# Supplementary material for: Fermentative Spirochaetes mediate necromass recycling in anoxic hydrocarbon-contaminated habitats
Source: PubMed Central journal article supplement (PMC6052044; doi:10.1038/s41396-018-0148-3), 2018-05-30
Supplement: 41396_2018_148_MOESM8_ESM.pdf [file 41396_2018_148_MOESM8_ESM.pdf]

>SPBIB\_v1\_10001|ID:27161763| protein of unknown function [Uncultured spirochete bib]  
VVDIRPVYHHLDDRIRAHVLCFIAMVLRVAERTLSMSWRDIAYTLTDIRVGHTKGPDG  
ELWLTSPLEMQRTLFTMLKVKHPPKVWDFKKSCKAPIGV\*

>SPBIB\_v1\_10002|ID:27161764| transposase [Uncultured spirochete bib]  
MGKVTKAEVSAILQGMQDRELYEKLLGLKEPWSVENVTLDLPSATVTVAISHPKGAKFPC  
PVCGTERPIYDHQKRRWRHLDTGFTTILEAEVPRIQCPEHGVKQVNVWPWGEPGSRFTAL  
FEAIAISLLKVASFSDVARHLRISWDAASGIMERA VRRGLARREAQPLRRIGIDETSFOK  
RHEYVTVVFQDQERSCVVDVLDGRKKETLKTWLAANQNALTALESVSMMDMWDAYIGAVREA  
HPDGEQKICFDRFVAQYFNKAVDKVRAEEHREFKTRGEQSPLTRTKHAWLRKGGAPDAAF  
SSLARSNLKTARAWRIKEAAELLRTKSHEEAARDWRKLLSWMMRSRLGPVVKVAAMIRQ  
YLWGILNAARLGATNAKNEAVNATIQLKVRACGFRNRSRFRKVMVILSHLGLSLLPEVMT  
\*

>SPBIB\_v1\_10003|ID:27161765|chpA| toxin of the ChpA-ChpR toxin-antitoxin system, endoribonuclease [Uncultured spirochete bib]  
MVKPKKYVPERGDIVWLDNFNPQLGHEQKGRPALVISFKEYNEKIGLALFCPITSKVKGY  
PFETEYKGIINGCVLSDQVKNLDWTVRNVEFIEKIEDEKLNIDIIDNILLIEK\*

>SPBIB\_v1\_10004|ID:27161766| Transcriptional regulator/antitoxin, MazE [Uncultured spirochete bib]  
MQTVVQKWGNSLGIRIPSVYAKEFNKLGNSVEIVKEGGKIIIPPKKTLEEMLSKVTKD  
NIHAPIETGSSLGNEEW\*

>SPBIB\_v1\_10005|ID:27161767| PilT protein domain protein [Uncultured spirochete bib]  
MLNSILIDTGPLIALFDKDDTYHNKVKDFIKNAKYRFITTA VITEVSHMLDFNINAQID  
FFEWIMKEGVILQEISQKDISRIIELTKEYSDRPMDFADATLVIAAEKTGIKKIISIDSD  
FDIYRLPGKVKIENVFHK\*

>SPBIB\_v1\_10006|ID:27161768| CopG-like domain-containing protein DNA-binding [Uncultured spirochete bib]  
MTTVRLPIEIEQRLEILARKKHKSCTDLIREALEKLFIEESEKDSYELGEEYFGKYGSG  
DGTLSVITYKDKLKDKINAKLNSH\*

>SPBIB\_v1\_10007|ID:27161769| Phospholipid diacylglycerol acyltransferase protein [Uncultured spirochete bib]  
MPISKSTNWGRKEKMITYTESLRGVSHYSLDGFCEGWQQLTPLQLRSILKHSTYRILAM  
DTEHTRIVGIITALSDKIHWAFIPYLEVIPAYQKQGIGKRLMELMIEKTKGIVCIDLTCD  
TEMQAFYEQFGMVASHGMILRRYMDEK\*

>SPBIB\_v1\_10008|ID:27161770| conserved protein of unknown function [Uncultured spirochete bib]  
LANFKIAETETFEKKIQSSQYKFLYKKIQHYIYPLLRENPFYFGPNIKKLKGEYKEIYRFR  
IGDYRLFYTISEETVIIFILDENRKDAYK\*

>SPBIB\_v1\_10009|ID:27161771| conserved protein of unknown function [Uncultured spirochete bib]  
MAKTITVRVEDTTYDIFKKA AEGQKRTISNYLEFAALNYTVNETVDDSEMKEILAFEND  
IKKGLADISAGRYKVIG\*

>SPBIB\_v1\_10010|ID:27161772| Ribbon-helix-helix protein, CopG family [Uncultured spirochete bib]  
MKKTNTITLRVPEELKERIENMATLQGVSMNQFALYAFTKELSELENSQYFKKYLGKGGK  
EEIIGFDDVFSKVKPRNVDQWDTL\*

>SPBIB\_v1\_10011|ID:27161773| Toxin-antitoxin system toxin component, PIN family [Uncultured spirochete bib]  
MKVVLDTSVLFQALYSSTGASHAILKLIREGALQLPISIPVFEEYREVLLRQSSLDL FEL  
STNDVQKIIDFIALIGVKTDIRFLLRPNLRDENDNIFIELAFASGAHYVITKNVNDFKYD  
ADLRFNEITATPAEFMKIWRNTYEK\*

>SPBIB\_v1\_10012|ID:27161774| Plasmid stabilization system protein [Uncultured spirochete bib]  
MSAKYTIVFSRYAEDDLSEIHKYAEKNSQYALKLLDTLETRVQELREL PARGRIVPELA  
QQNILEYRELIEGNYRIIYVIQDSMVVIHAILDSRRNLEELLMQKLMRFYS\*

>SPBIB\_v1\_10013|ID:27161775| Prevent-host-death family protein [Uncultured spirochete bib]  
MNVNLKDTIKPISYIKTNAADMMKFINDNKSSIIITQNGEAKA VLVDIDSYQEMRDAFSL  
LKIIKLSEKDIAAGNYKESDAVFSNLR TSLSK\*

>SPBIB\_v1\_10014|ID:27161776| conserved protein of unknown function [Uncultured spirochete bib]  
MNKKVFIDSDVILDLLSKRQPFYPA AAEIFTFGDYGLDLYTSSLVFSNVFYILRKS VGN  
EKAKELLRKLRLIRIPIVEKNIDMALNSTFTDLEDAIQYYSSCSFGIDVIVTRNTSDY  
KNSEELLIQSPEEFINIISIEKE\*

>SPBIB\_v1\_10015|ID:27161777| conserved protein of unknown function [Uncultured spirochete bib]  
METKLTCLKDQAIQRAKQYAEHNRSVSKLVEDYFRNLIVNRKDKTHYSPLVEELSGVI  
TPDDINNSDYTSYLEAKYE\*

>SPBIB\_v1\_10016|ID:27161778| Kinase domain protein [Uncultured spirochete bib]  
MENDVIKQIRKDYTFIRNIGRGATGAAILLKDELIDQLFVCKKYQPAMGIEPAEYYSKF  
VNEIKMMYLLNNRNVRRIYNYLYPKQYTGILMEYIDGNSIGDYISKNPKEKIDIFIQT  
VNGFYELQENGILHRDIRDSNIMVSSEGIVKIIDFGFGKIEFSDYDKSISLNWQCQP  
NEFNDGRYDFKTEIYFVGKLFKLLLDNGLSNFKYSDQLKKMIAPDPENRISSFKEIFSE  
AILKNDMENIFEDEIEIYRSFANGLSAIYAKIENSAKYEKDVELIISKMEECYKKNMLE  
QEIIDSNDLAKIFVQGA YTYKKRTIYLSCLKNFLQLLKGASSEKRRRIIMLNENRLDAI  
EHYRKPEDNFTDDIPF\*

>SPBIB\_v1\_10017|ID:27161779| protein of unknown function [Uncultured spirochete bib]  
LAYELDYVIFHFTLTREKSI\*

>SPBIB\_v1\_10018|ID:27161780| membrane protein of unknown function [Uncultured spirochete bib]  
MAIKEKKQRYFEYFTYLKTSINLAYRPSKLLDYSLKHSFTTLLFNSITLISIFSLTIVIV  
LALFNSEYSIENQIKISFAMFLISLLYLPGLVTSILFKNKILKTALKASFFICINIIVFY  
LSIPIFSLIIFKSEIYFFYYAYLFLCIIFFIYIILPILYSKGNHRINILLSIVIA  
LSFNISVSFIKNQNNNIAESIDPIFYELRSNNLLERSRYDYLDQDTGNIINSVNKYLN  
DNIKYLEELGLEEKPLLLLKESLLELEKKIHFRTNKQLITTSIEAADILRNISQTSRIT  
ELSDLPQSIQKGIAYINDGKELIEKNQKIVNEDMTKINTILDKINHLKDITTEYNQM  
LKESTKLNNDIININLDIKKIDALLKNADAELETTDQYIEYLNKKNSVIKEITILIEEYE  
KNINDRIKAVKKIEQIYKLKNVYFFP\*

>SPBIB\_v1\_10019|ID:27161781| protein of unknown function [Uncultured spirochete bib]  
MIDIYDLEKVLVSKISFKNLIDLRTKKYLM DINYPSLYVFWFNNDGAIKNLKRNFVIKK  
PGKFENNL\*

>SPBIB\_v1\_10020|ID:27161782| protein of unknown function [Uncultured spirochete bib]  
VMIVASFLGFAWGWLFLFVKMPGEKTPSEISEIDEEKTKKARISILFFQKVR\*

>SPBIB\_v1\_10021|ID:27161783| IstB domain protein ATP-binding protein [Uncultured spirochete bib]  
MIRTPQERERTRITIASMSRKLMLSSRVVELCESEATPRQEEFLKVLSEEIDRRERGKK  
ARLLNRAGFPVFKSFEDYDFSEIRFPPALSKEELLRADFIPEKKNLVLYGGVGTGKTHMA  
IALGIAACEKGLSVRFLTVTELVLKLEAYKAGTLERLIRDLKQLDLLILDEWGYVPVDR  
EGSQLLFRIIADSYESKSLILTTNLEFSKWGGIFTDEQMAAAMIDRLVHHGHLLEFEAKS  
YRMTHALMRQPGPTAKPKTTVEAGSRLGEGGA\*

>SPBIB\_v1\_10022|ID:27161784| Integrase catalytic region [Uncultured spirochete bib]  
VINMPQIQGIREQYREGSSVAELARIYGVDPKTVRKYLKQDDFSPKPPEKMTKESILDPY  
KPLIDSWLLEDQGRWHKQRHTAKRIHDRLISEVAGYACSYNTVQRYVKRVLQEQRVTRAS  
MELVWHPGESQADFGADFLERGTMRVKKYLTLSFPYSNDSFTQIFGGETAECVCQGLKD  
IFAYIGGVPPLVVF DNATGVGRRIGEIIHEAELFSRMRAHYGFSVRFCNPESGHEKGNVE  
AKIGYTRRNLFVPEPAFDDIEDYNRTLLSLHASKAQESHYKLLPIKDLFEEDTRALLPL  
PRTAFDPVRYDYLDKADGYGKVRIDSRHYSTSPYAGQEVLVAIRAHSIDILDDHKRLVV  
RHSRVYGERRSDSSDYRTSLAVLMNPNPAGWKNSGIRELIPDPLKSLMDRQQRTQLHATLK  
TMHTLSSEYGF EIAVQALEEGVQRSRTSFHDAAILAARIAGYGLNMAPERGQDLHVYDEF  
LEGVQV\*

>SPBIB\_v1\_10023|ID:27161785| conserved protein of unknown function [Uncultured spirochete bib]  
MNKKVFIDSVDLLSKRQPFYPAAAEIFTFGDYGLDLYTSSLVFSNVFYILRKS VGN  
EKAKELLRKLRLIRIPIVEKNIDMALNSTFTDLEDAIQYSSCSFGIDVIVTRNTSDY  
KNSEELLIQSPEEFINIISIEKE\*

>SPBIB\_v1\_10024|ID:27161786| conserved protein of unknown function [Uncultured spirochete bib]  
METKLTCLKDQAIQRAKQYAEHNRSVSKLVEDYFRNLIVNRKDKTHYSPLVEELSGVI  
TPDDINNSDYTSYLEAKYE\*

>SPBIB\_v1\_10025|ID:27161787| protein of unknown function [Uncultured spirochete bib]  
MIYGILVFLWCIIGYIFSLITEIPLGYVGPIAILLGIISMNIIRKKMK\*

>SPBIB\_v1\_10026|ID:27161788| protein of unknown function [Uncultured spirochete bib]  
MKSIIISHNKLFTICLHNMLNYLVKDNKNIIDNFVLIVIDATSIDSNILQKLLKYSDS

IYRILLIHDHVDDLTEKIVYNSRVVAVYNPRASNSTKFGHLLQHVLDGGVMLSKEKLFEL  
RHTESIHTKIVFTKREEEINQLLHNGDSIKVISSKLHISQNTVKVYISRIYKKLGIHSRA  
EYYINYDVLSGNMEVKA\*

>SPBIB\_v1\_10027|ID:27161789| exported protein of unknown function [Uncultured spirochete bib]  
MKKIFACVLIVLLVVSVPAPAFARPTARENADFVVDIIGISLGIVKRAGTALAVVYTAADF  
ITYAVTGKTIGGYANDGFEEKSKIIYADDNKPYRGWMGLGMQ\*

>SPBIB\_v1\_10028|ID:27161790| Integron integrase [Uncultured spirochete bib]  
MGSIIFDKAAAFMNYLMAKCNFSAKGTEWACIWVEKFLRFYDPDWSNREKAIAGFSEALSR  
RKPANIVNLALRSVQLFIAFIDFELGERPLARSTQSGEDATGSRSKTCSISASSEENPGE  
SKDREWQEFASRAMKQVRELIRLKHRSRTEKTYLGWTRRFLDFIRVRRLANFVDGAPKI  
TADHLRAYLSYLAVDVRSASMQEALNALLVLFMRVLHIEIEGLSSVLRKAKRRLPMV  
LSREEVSALLAQLRQPYRLMASLMYGCGLRLEECLSLRVKDINFENETIEVRAGKGGKDR  
LTMLPGVLKRVLHEHLRELRALWEEMRRRDLPGIFLPEALDRKYPGLSKEWSWFWLFPK  
SPCANVRTGEIAFWHVHPSVIQKKIRLAIQAAGIQKLASAHTLRHSFATNLIEDGYDIRT  
IQELLGHSNVQTTMIYTHVAMRNKRGVRSPLNL\*

>SPBIB\_v1\_10029|ID:27161791| protein of unknown function [Uncultured spirochete bib]  
MSQCGTRGACAVLWRICEQGSRLRHSNLFSDSDGESGRNRFTFQQIAFYHILLKSIVN  
RSEEVVNLILEKELEAK\*

>SPBIB\_v1\_10030|ID:27161792| Anion transporter [Uncultured spirochete bib]  
MNKNSAARKLAAIGIAAILFAVLAFLPLPDSVRRAGDALLDPKGQRAIAVLAGALVIWVL  
EALPFHITGLLAMVMLALVGAGDFATIVKSGFGDDVVLFFIGVLALAAIVRSGLGKRV  
LLVLSITGNSTRRIIFGFLAAGAFLSMWVTAIASSAIIMPLALAILTEEGAKPGESRFR  
ALMLAVAWGALIGAVGTPAGSGSNPLVVKFMGSLAHVDISFVRWMTIGLPIVALLLPSAW  
GVLVLFSPPEMTHLQKSRDDIKHEFSNQSRMSHDEKATLIVFAITVLIWVASPLFQSF  
WHIKIPISMGA VAAVLLFVPGMTSFKWKDLQKEIDWSGIILIAAGISLGMTLYQTGAAAWL  
SVVLLGGIGNLPLFVRLVLIVLAVLTVKIAFSSNTLTGTIIVPLVLALGPLLGTGAAGLA  
LAAGFTANLAILVTTSPVNIIPYTTGYFSIKDMAIAGLILTPLAALIALVFSILGPAM  
GIL\*

>SPBIB\_v1\_10031|ID:27161793|sucD| succinyl-CoA synthetase, NAD(P)-binding, alpha subunit [Uncultured spirochete bib]

MSILVDQSTRTIVMGATGSEGTFWTEHVMVNLGTHIAAVTPGKEGEHVGDIPVYHSHVHRA  
LDASALGSRSAAGAPADTYAPADAAMLFPVPHFTKDAVFECLDAGIKLIVIVADGIPLHD  
ALQIRAASRTEGALVVGNTSGIISPGKAMLMGMPYWIERYKPGRIGVMTRSGSLTNEV  
TAMVVRAGFGVSTLVGVGGDPVPGTRFAEILARFQEDSETDAVVMIGELGGTMEEEAEM  
IASGAFSKPLIAFIGGRHAPKDKRMGHAGAIISGGKGSALDKMRALEEAGALTAERASQV  
GILLAETLKSARGAVTSAKSARSPLSADSAPGASTRGSHNE\*

>SPBIB\_v1\_10032|ID:27161794|sucC| Succinyl-CoA ligase [ADP-forming] subunit beta [Uncultured spirochete bib]

MKLHEYQAKALFREFGIPAPQGEADTVEAAVNSAEHLGWPAALKAQVLRGGRGKAGLVK  
IVQTPEEACTAAQAIFASDWKVRKILVEQAIAHERELYVSFSADSRTGAHLLLASAEGGV  
EIEDLARTAPEKILKEHIDSIRGILPYQARTAAYDLGFAPSLAKGFASIIKLYRLYVQK  
DCELAENPLFVTLEGNFIAADAKISIDNLFHPEFEQDPADFDSDIAREAAAEGIPY  
LQFDGDISLMCAGAGLTTAVYDLVDFGGTVANYLEFGGPNYRKSVRAMKLCIKNNPKVI  
LIVTFGTIARADIMAEGIVEAIRCLRPDCPIVTCIRGTGEDKARETLLSAGLEPLTDEE  
AVKKAVELAHARSTATERPTPAAASKQGGQP\*

>SPBIB\_v1\_10033|ID:27161795|sauS| Sulfoacetaldehyde dehydrogenase (acylating) [Uncultured spirochete bib]

MNGQSILSEQASSEQASAGQTSSAPKTDSADGQAFIAEIVARARAAQKIAATWSQERVD  
EVCVAVGWSVYNDENIRKLAELAVAETGMGRVEDKITKHKNKVMGVLRDIRGVRTVGLME  
EDPARGLRKYAKPVGVGALAPVTNPTATPASNGLSILKGANAVIFAPHPKAKKSTTLAC  
TFMREALRKVGAPEDLVQVIEEPSIELTQELMRQVDLIVATGGSAMVKAAYSSGKPAYGV  
GPGNAVQLLEDADPEDAAKKIATSKSFDNATSCSSENSAVVHRAVWDRFLAGLQKEGGW  
LCTAEQKKALRHYLWVTGKNGQENLNPAIIAQDADKIARGAGFDVTKGTRFLIVQGEQPI  
ESDRFFWEKISPLTVLPCDSFEEGLRFVERITDLCGTGHSSGIFTFREDYIDRMGLYMR  
SSRIMVRQPMVSGNGGTFFNGMPSTVTLGCGTWGNNITTENIHWKHFINTWLAMPIELN  
RPKDEDIFGDYWKRFK\*

>SPBIB\_v1\_10034|ID:27161796|rpiB| Ribose-5-phosphate isomerase B [Uncultured spirochete bib]  
MPEKIVIAIASDLSGFPLKREIVKHLRENHPELEVLDGIESEDAPKPYIQAQKVAKAI  
QDGRAQKGIACGTGQGMIVCNKHKGIYACVADDIFSGERGRIINNANVLTMGGWITAP  
FLGCQIVDAWLSVAFTQKMEFKKDFLTNAFNNVQKIEEENFK\*

>SPBIB\_v1\_10035|ID:27161797| putative transketolase C-terminal section [Uncultured spirochete bib]  
MSDQKEMRAVYAETLISLVEEGKDIVVLEADLMRATGTTAFACKYPDRAVNVGVAEANLV  
GIASGLSAAAGKVPFAATFACFASRRAYDQFFLSANYAQLNVKLGITDPGVTAAFNGGTHM  
PFEDLTLMRVIPRLTIAEPSDPISLAAITRLGANLKGsfymRLQRKPAPVIYRENEFSI  
GKAKVLRGGDVTLVALGTMVNEALKAADMLAQEGIKATIIDALWLSPLDEETILAHSG  
CGCIVTCENHRVTGGLGSAVAEVIAEKAPGVRLARIGVAADLFGVGTLDWLAERFALTA  
PHIADAARTLIQQK\*

>SPBIB\_v1\_10036|ID:27161798| putative transketolase N-terminal section [Uncultured spirochete bib]  
MNTHEIQALERKAREIRGLTIEEIGYLGVGHHGGALSIVDLLVLLYHKHMNINPKEPGWP  
ERDMLVLSKGHAGPALYATLADKGYFPLDWLLTLNKGGTNLP SHCDRTKTPGIDMTTGS  
GQGLSAAAGLALGRAMDRKPGFVYCIIGDGESNEGQVWEAAMFAAHRKLSNLIAFADWNG  
MQIDGLTKEIIDMDDIVAKWTAFGWHARMVDGHDFAAMDKAIEEAKRRAAPGIERPSMIV  
LRTIKGKGASFCGQVTNHNMSYGIPQTKREALAALGVPARLIPELVHGA\*

>SPBIB\_v1\_10037|ID:27161799| protein of unknown function [Uncultured spirochete bib]  
MSKERAMGRMRVRVKRAAGMARLFTRALVMGLAMWVVTGCSPPAIESAVLGDIRPPMVKN  
ARLESGYEFIEFDEPVRVPKDSFSAEPKRLAAQAESSENVSVLFEPPQSPGCVVTLG  
TVQDMCGNSTRVQVQFKGYNDRPAGLVITEIQTAKNTSKKAPHRDYIEFLVKKAGNLGGI  
YVQWASSTKTMRFDFPACEVRAGEVIVLHLAPEGVAEEKNETGSELGLSGGIDATAQGRD  
FWS DAGGLPDASGAI VHEREGALPIDGIFYADSSKSGKLES AKLIALARELADAGLWKL  
DVPPLWENALLWKPSTSRPLVRTSTSPYGASAWGIGESGSQSPGIVN\*

>SPBIB\_v1\_10038|ID:27161800|trxA| Thioredoxin-1 [Uncultured spirochete bib]  
MSAEVTLTSENFKKEVLESKIPVLVDFWAEWCMPCKMIAPSV AQIAESYKDRIKVGKLVN  
DEQSDLASQYGIISPTLIVFKDQVARQKVGAMPRHEIEKLFDLI\*

>SPBIB\_v1\_10039|ID:27161801| MATE efflux family protein [Uncultured spirochete bib]  
MIGKQTEKMPNTTASPFARSLSLGPFWFYREALALAI PVMQLSLITGLVSLVDNFMVA  
GLGDAKMAGVNIANQVNFVFMVIINVVTIAGGIFLSQHRGAKNQEGMIQAFRFLVMGTG  
LSTAYFLVCVLAPEALLSLMVSNNAQGAVIVAEGARYMRAVSFSFIPIALS GAIGSSFRD  
IGEPKVPLL VSTAAA IANTIGNWFLIYGNFGAPRLEV VGAATATVIARGLEITAFIVMLK  
ARKPAFAFRLKTIFRINGKFFADVLSRSAMMFFSETAWV VSETIITALYNRRGGPETVAG  
MAAGWSVANLFFLVFP AIHTATNVIVGSTLGAGKLEDEGRAKARWIMAGSVFFGLAAGLFA  
ALSTAVVPLVFGNLS DQARIVTRSIIFVIAIYLPLWCLLNAQFGVSRAGGDTLMGLFVDV  
GVTYVLFIPAAFVIARYTSWGPVALFGIAKLS DIPKALVAGWWLAKERWVRNLTVASVFK  
AVL\*

>SPBIB\_v1\_10040|ID:27161802| Beta-mannosidase [Uncultured spirochete bib]  
VEIINLAGQWRLVRLADGSARPMEVPGDIYSALIQSGELKDPYYGESELKAQWPGREDWK  
IERSFTIPEHFLQLETIRLQADVIDTISEVYINGSLAGTSNNMFRSFEANPKPLLHPGEN  
FIAVIIRSPEQAAIREAARLHYPASLYPVSSPHRNLIRKAQCMAGWDWGPCLMTGGIY  
DSIKLIATDGPVIK YVQTRMKALGPFPA TEEEPASGPDFSLDIFADIEVPEEMDIETEFF  
LVGRHVSHDCHLVSNYHLAAGTHRISATMLVKKPDLW WPNGHGKPALYDLYLKTGSDPLS  
EISAEVHKKIGFREL RVVSEEDDIGRSFKFV VNGKEIFAKGANWIPADALPSRWTRARIA  
GLLDSAVEAHMNCLRVWGGGRYESDDFYELCDER GIMI WQDCMFSCALYPSSPEFLSNVE  
AEITHQVKRLSDHPSIALWCGNNEALGAITWY EESKKNPARYIVDYDRLTEGVLGRVIRA  
LDPDRCFWPSSPSAGPNDFSDNWHSDER GDMHFWSVWHEGKPFSEYLT VQPRFCSEFGFQ  
AFPSMRTIESFAPSDERNISAPALEAHQKHPRGNSLILDTMLRYFRLPKGFWELVYLSQV  
QQAMAIRTA VEYWR SAMPRCMGTLYWQLNDVWPAVSWSSLNYDGTWKLHLYEARRFYAPV  
ILALFIKDGI AQAHIVSEIPGEHTATITLQLLDFHGEPRGVLCTNSSTITNLT SQIVWHM  
PVSEL PYKPEEA YIEAALDVPDLGISTAILFLTEPKRCKLADPGLDVT LATNEKGQIEA  
TVHASEAPAFYVALELEGLPGQFEDAGFYCKKGARKK VAFISEETATTRKHASIATQRAH  
AEASAISMANASLQARLRV FHLQNSFEH\*

>SPBIB\_v1\_10041|ID:27161803| ROK family protein [Uncultured spirochete bib]

VSSRSDQWTRTATRIFRTIWRPNPNSRVDLAKKLGLDKSTVTKQVADLLENGLIEEKEEG  
EASARGGRKPIYLAVNKEYGRFIGIELQLGFFEAVVVDLAGDILETARGEVRITQENFAA  
TVADIVDTMQKRFCSDSLLLGVGVGTAGLVDSKKGRIKYSVPLGIQKTLDFAKAIAGKLK  
APAFIENDANCCAWGELAFNRDEELKDFLFALVEYRQDETSLIRYGGIGVGFVVLGGRV  
HTGAHGYSGEFRSAFCDPGELQFSLSREELMCLRGDKNLLHRTVDELARNMAMLINTMD  
FQHVIYIGGDIEALDIDLPAILRHRLEENWMPSPKDVEIRYSSLGDKAVAFGAAGMVFER  
LMAERSMPGLAVELKNLDQQIGA\*

>SPBIB\_v1\_10042|ID:27161804| Extracellular solute-binding protein family 1 [Uncultured spirochete bib]  
MKKGLFVFLALIALGSVMAQEKVTLNVLNYQQADQAGYQEDVAIWKRQFQELNPDITLNM  
EVLNFNEPYHQKLQAYAAAGTLPDVFYVWPTARSAVIHEKKLAKDLSKLLGPDFLKDFSGA  
ATDPNNQLGKYMAMLPQSFTYTSVMYVNNKLLADNGFDLPKTYDDLKMMVPKLLKAGGINV  
IMLPDKDGMWPMQSCFLSTVLGRMAGNSFVDAILAGKAKFTDKPFVDSLKVIDNLYKDGII  
AREDNQVGYGEAPGLFVSGKATIIYIDGWRVGA YITDKASGKALIPPAQESDFALLPFP  
AIPGEVNPGLVLSAIAAGTGWASASIPAGSAKEKAAVRLIKYLYSDEVQAIRYSTGAYVPT  
RKNVKANVEPLVAKVPLFYAANPKTCYVFDGMFDPAVYNVNDGLIAIGLGTSTPEKVAA  
DVQKAYETWKASQK\*

>SPBIB\_v1\_10043|ID:27161805| ABC-type transporter, integral membrane subunit [Uncultured spirochete bib]  
MVHLNRVHLEEKRAYWAMVMPAFALYLLVMAFPIILSIMLSVSNYSGGKMFGEKWFAG  
FSAYARVFTDPWFNALKNNLYIVLISVFGQLPLGFIFAYFIYSKIVRAPSFWQGVLYVP  
NIISVIVVGLLWQVIFSPHGPAAEIVNSIHASSFQQLKAIFDGAGGFSLSDDVIKKILH  
LAGPSGQAMFSDPPELRLDASYNQPISEIYTALSNLFVQKWSPAFLTKTDIAMPLPV  
FVILWMYTGMYLILFLANMQKIDAQIESARIDGANEGQVMRYIILPALS GTIVNSAILA  
ISGSLSSFALIFAMTGGGSPRVTEILSIYMYNNAFLGRPNFPLANAISLIMVLISVVLIV  
LTKAVEKRYGGKEE\*

>SPBIB\_v1\_10044|ID:27161806| ABC-type transporter, integral membrane subunit [Uncultured spirochete bib]  
MSEMIKETKLQKALAAVGRGAVYIVMSL FALMTLYPIFWLIMNSFKTTREFQVSQ LAFPR  
APTLQNYVEAWKMGDFGLLPNSVLYTLGATAGIIFLSLMAGFAFAKLKSRATKLIYNSF  
VIGILLTQTLMIPFLFVNLLGLYNTRLAVLLVYIGAGLPIGIYLATEYIKAIPSAVVE  
SARIDGAGFFTIFLKIIVPMSVPVATTLAMLNITGLWNEFALINILVSKTELKSLPLGIY  
KFSGSLSTDYGGKQFAALTIGMVPMLVFYMI FRKQITKGVAAGAIKG\*

>SPBIB\_v1\_10045|ID:27161807|bglA| Beta-glucosidase [Uncultured spirochete bib]  
MKRQDGFPEDFVWGCSTSSYQIEGAASEDGRGPSIWDTFSSHTPGKVVQGHGTGDIACDSYH  
RWREDVALLKELNAGAYRFSVSWTRIQPDGKGKPNQKGLDYYSRLVDGLREAGIEPWLEL  
FHWDLPQALEDAGGWRNRDTAFRFEYARIMYKAIGDRVEHWTSMNPEWCA AFLGHLTGE  
HAPGLRDREKTSRAVHLLLAHGLAARA YREGGFKGEYGLVINA AKPRPATLRPEDVEAS  
ERASIERTSLWDPVFGRGYP ELMQHFSGMQMPIEPGDMDIIA APIDFIGVNYYNEDAVR  
AALLSEENPYGFYVPTWQRKTEMGWDIEAQGLRRILMHIARNWPAKVLVY TENGAAFAD  
APSPDGVIRDYDRIEYLREHLAACRQVI ADEVPLKGYFVWSLMDNF EWSFGYTRKFGLVS  
IDHITKARRPKLSFYYYRDAIAGFGL\*

>SPBIB\_v1\_10046|ID:27161808| Beta-N-acetylhexosaminidase [Uncultured spirochete bib]  
MGCDLVPIPVLC EAKEGVFELGPGMSVQVSAGLEKEAALLAEWLSGIEGVGQVGISRAPV  
ANAATSISLSLDPGMQRAEEYELGIAPQGIRIAAKDAAGIVRGASSLYQLALSQSRALRS  
LRIQDWPRFAWRGFMLDCARNFFRVEFIEKLLDLAALHKLNVFHWHLTDDQAWRLEIASK  
PELTGRGAFRQDMRYEIEWEKGGFYTRADV ARVVEYAAARHIMV VPEIETPGHSTALLAS  
HPEFSCRGASDPSVLFKPEDHYGIFEDILCAGNDRVLA FIDEVLEEVCAMFPGEYVHMG  
DEAPKARWLSCPACRSRMDVLGMRKGGGQYEPERLQAWFMGRMAEMLTRCGKRMIGWDEV  
LEGGIQKDTLIMSWRGAEPGVRAASLG YDVMCPQTKACYLDHKQFDVPEEPGHLGVCT  
KDSYNFDPVPDGLRKEEA AHILGGQANLWSELVYFGRQAEYMLFPRLCALSEVFWSPREN  
RDFNDFSTRLATHTQRLDMLDVLYCRGKYF\*

>SPBIB\_v1\_10047|ID:27161809| putative Transcriptional regulator, MarR family protein [Uncultured spirochete bib]  
MSEHSELENALKAWISQIMRLSMRGFITFATEIGLSMPQIAVLFRLNGDKRCAVTELGDE  
LGVSGAAASQMVDKLVQLGLVDRLEDPHDRRVRLLLLTQK GKTIERSIEARQE WIGHFC  
SSLSEEKAKEAAGLFNQFAQIAEQLETALHTPSSH\*

>SPBIB\_v1\_10048|ID:27161810| Xenobiotic-transporting ATPase [Uncultured spirochete bib]

MRTLFRYLKPYWLSIVLVIALLFIQANADLSLPDYLSKIVNIGIQGGIEPDLQPVRIS  
SFEALGRLLQAEGAGEKFAALQKVYTHVTPGSDQAKTLSKKWPLANSEPVMSLDLSDKAA  
VDAARQVFLAEYPKLVVMSQLPNAAMGGAGALGGAVPSAGPSAGTLPSAGAVPGAAAPN  
MPAPSGQVPSGQASGAPAALSPQAILSQIDSLDPLAKSQLVVRGLQKEFEALGVDTVVLO  
TGYILSIGAIMLIITLISVASTIMVGFLGSRVAAGTARDLRRVFTKVEDFSLAEFDSFS  
TASLITRSTNDVTQVQMMIMMGTRMLFYAPIIGIGGVIRALGKASGMWWIIAAAVGVVIG  
IIGLVFALVVRFRVTVQKLVDRNLVVRENLSGMMVIRAFNRQDHEVQRFDKANRDLTST  
MLYVTRVMVVLMPIMTVIMNVVSVSIIWVGSHEVSAGSIRVGDMMAFMQYSMQIFFAFLM  
MSMMFIMLPRASVSADRIAEVVNTPVSIKDPEAPKLLPKPTRGEIEFRNVRFRYPGAQED  
VLHDSFTA KPGTTTAIIGTTGSGKSTLVSLIPRLYDVTEGAVLLDGTDIRTLALSRLG  
AIGFVPQKSMLFSGSIADNVRYGKDSAAEEEVKEALELSQIWSLVEESPEGLERQISQGG  
MNVSGGQRQLAIARALVRRAPVYIFDESFSALDYRTERAIRAALKTYAKDSTVFLVSQR  
VAPIRHAEQIIVLDDGHIVGIGKHEELMKTCDVYRDIALS QLKQEELA\*

>SPBIB\_v1\_10049|ID:27161811| conserved membrane protein of unknown function [Uncultured spirochete bib]  
MNGTQKPENIQKSASPAQTSHANS GM E P A K G G A P S S A P S S T Q G T A K I R P G A M M G R G G P G A  
LMPGEKSKDFKGTMKKLIAYLGPYRWAILAVMILATIATILGIMGPKVLGTATTTLFDGV  
VKKLSRTGDIDFAKIGSILLTVLGLYLSSAILQYIQGWVVS G I A I K I T Y N L R K D I L A K I N  
RMPFRAFDNTNHGEILSRMTNDVDTVNQTL S Q S L S Q M I T S V M T L I G A L V M M L T I S W Q M T L  
VAMVMIPSLVLVRFIVKRSQKYFKTQQEYLGHLNGHIEENFGAHTVVKAYGGESRAIKT  
FDSLNSTLYQSAWKSQFLSSIMMPLMNFVGNLGYVAVAVSGGYLA AKKMVTVGDIQAFLO  
YVRSFTQPITQVANISNVLQQTAAA A E R I F E F L A R E E E S P D S E A S A T L V P A R I E G K V E F R  
HVHFGYVPGEPHIKDFSATVLPGQKVAIVGPTGAGKTTLVKLLMRFYEPDSGEILVDGIP  
IQDLPRSVRSWFGMVLQDTWLFSGTVKENIAYGKHDA A E E E L V E S A K A A H V D H F V R A F P  
EGYNLVLNEETTNISQGGKQLLTIARAMLAHPPMLILDEATSNVDTHTELLIQKAMNTLM  
QGRTSFVIAHRLSTIRDADLILVMDHGDIVEQGTHEELLA K C G F Y A E L Y N S Q F D E T G E A Q  
VACS\*

>SPBIB\_v1\_10050|ID:27161812|groL| Cpn60 chaperonin GroEL, large subunit of GroESL [Uncultured spirochete bib]  
MAKQLLFSE D A R R K L L V G V E T I S K A V K V T L G P K G R N V L L D K K F G A P T V T K D G V S V A K E V E  
LEDPYENMGAQLLKEVATKTNDIAGDGT T T A T V L A Y S I V K E G L K S V A A G I D P M A L K R G I D  
QAVTIAVEEIRKNSKEIKEKEEIAHVASVSANNDIEIGNQIADAMEKVGKDG VITVEESK  
TMDTTIEYVEGMQFDRGYTSPYFVTNRDSMTTVFENPLILIHDKKISNMKDLLPVLEKIA  
QTGKPLIIAEDVEGEALATLIVNHLRGT L N V C A V K A P G F G D R R K A M L E D I A I L T G G E V I  
SDELGLKLENTSLNQLGTAKTVKVDKDN T T I N G G G K Q K D I Q D R I A Q I K K Q I E E T T S D Y D  
REKLQERLAKLAGGVAVINVGAATEVEMKEKKHRVEDALSATRAAIEGIVSGGGIALIQ  
AALALDKADISKLS D D E K V G Y K I V K R A L E E P I R Q I A E N A G I D G S I I A D K A K H E K K G I G F D  
AAKMEWVDMMKAGIIDPAKVTR S A L Q N A A S V A A L L T T E C A I T D L P E K E K P M A N P G G G M G  
GMGGMDY\*

>SPBIB\_v1\_10051|ID:27161813| RluA family pseudouridine synthase [Uncultured spirochete bib]  
VKAQFPILYLDDSIIDKPA G V L A I P D H W D P E V P V A Q Q M L A K E Y G T L L P V H R I D K D T T G  
VLLYARTQDAHRALNERFSTRQVEKVYLAI V S G E P E H D E W E I D A P L R A D G D R M H R T I I D M  
SKGKPALTRFEVVERFRGFALVRALPETGRTHQIRVHLAASRLPILADALYGD A E P L M L S  
KLKRRWKGDAFEEKPVIARSALHASKVTFLHPTSGMRLEIEAPLPRDFRAALNQLRKLRA  
I\*

>SPBIB\_v1\_10052|ID:27161814| protein of unknown function [Uncultured spirochete bib]  
MQSMHSRDSGGERMEK G E R S A F S M G E R D I Q A Q K V P F G L L M F D I D H F K K V N D T Y G H L A G D I  
VLKMOVAGTISGALRLLDTAARFGGEEFAVLVPNCNEEYLF L Q G G S F \*

>SPBIB\_v1\_10053|ID:27161815| Aminotransferase class I and II [Uncultured spirochete bib]  
MPLQISDLSDAVLHTHYAVRGPIVARAQELEHLGREIICYNIGNPQALGQKPLTYVRDVL  
ALCEQPALLERAPHAFPDDVMETARTILGQSKYGLGAYSESKGMRFVRKAIADFI A A R D S  
TGGVMQTSNPEHIYLTDGASKGVQAALRLLIASHKDGILIPQYPLYSATITLYGGRQI  
GYYLDEDSGWSLNEQM L E E A M H E A I K E G I R A R A I V V I N P G N P T G A V L T E E N I E M V I R F A K  
RHNLAILADEVYQENIYKPGARFLSFAHVMTKLSEHEVSLFSFHSTSKGFFGECGQRGGY  
MEVRNVPEEVIAQITKLQSVALCANLPQVMTYLMVNPPKPADPSYKRYVEERSHILSEL  
AQRAKILEEGLNRIPGIHCQPIQGAMYAYPSISLPAGKTDEEYCMALLEQTGVCVVPGTG

FGQKPGTAHFRTTILPPTTRQIEAVIDAVDAFQRQWG\*

>SPBIB\_v1\_10054|ID:27161816|hflX| GTPase HflX [Uncultured spirochete bib]  
MTSNTAQKNQNESVERAFLVGMATDKIRKAEARELLDELHGLARTLGLDIAGEMLIQLRD  
PTPSLLVGSGKADEIAAAAEAAHADSIIFDHILSPVQQRNWEKLSKKVYDRAELIIF  
ASRALTKEASLQVELAQLQYALPRLAHSYDDLMRQRGGRYGTKSGEQKIELDRREIERR  
IHEIQSELEAVRKERAVQRRRERASVPRAAIVGYTNAGKSSLLNALTAAASVRAEDKLFA  
TLDPTTRRLMLTRGQTLTLLTDTVGFIRNLPHGLVEAFHSTLEEASQADILIHVADASDR  
VDAHIATTIQVLSEIGAQDVPRILVLNKIDLAEPDVVQSFLARYPGSLAVSAKTGEGDLA  
LIEAIQESLTKDMKTCTLRIPHADYWIVSLVMREGTVLEERSDDAYTWLRCRVPQRMESK  
ILQYIAAEDPEVGKARESEGE\*

>SPBIB\_v1\_10055|ID:27161817| 2-dehydropantoate 2-reductase [Uncultured spirochete bib]  
MDRISSVIVGAGAIGASVAAMLSDSGHAEVQVCASGERQERYRKEGFVNGTRYFFPLA  
GKDTSRKADLVILAVKNYSLDEAIDEMKPFVGNNTIILSLLNGITAVPRLRDEFGADKVP  
FAMILGIDAHRHANEVQFTSKGQIFFGFEKERIAAGESKLRVLGDFLGVCNVPYRIPEDI  
VKEVWFKFMMNVAVNQWSALLRASYSLFHRSRHARALLEQTMAEVVNLSKKFGTGLSDDD  
IVRMLSILDGLPSFGRTSMLQDVEAGRTEVEAFAGTMVRLSKEAGIRCPYNEMLYQAIC  
ALEESYAS\*

>SPBIB\_v1\_10056|ID:27161818| putative Biotin--[acetyl-CoA-carboxylase] ligase [Uncultured spirochete bib]  
MFSLPVVSSTMDEARRIAEEGFPGAALVRADTQSAGRGRLAGRQWVDAPGSSLLVTMLMP  
SDFRTVEALPLRAGLGILRALES DTGKSLLKWPNDVLAPPRWGKLCGILCENSKGRVLI  
GFGINIKKSAHARANPSFPAASIEELCGFVPSAFSDLAAAQRVARSIMKALQDSGWHEA  
YESCLWARGSSVQFDAGHPDAPKRIEGILEGVDDEGKLILRVAGQRKTFASGELSHLRSI  
\*

>SPBIB\_v1\_10057|ID:27161819|glmS| Glutamine--fructose-6-phosphate aminotransferase [isomerizing] [Uncultured spirochete bib]

MNEKARALQAAYTVTNLAYAVPDSFCSAPLAANPLYDTIELQSCKNCIERKERSMCGIIG  
YTGPRKTAKILLEGLRRLEYRGYDSAGIAVGRENAEPRLEIIKSVGKIVELAKKMPEDID  
GSWGIGHTRWATHGGVTEANAHPHTDMSGKIVVVHNGIENHKT LR TMLEKKG VVFKSET  
DTEVIPHLIASYYEGDLLKAVLAALQHLEGTYGIACIHANEPGRIVGARNGSPLIVGVGN  
DEMFLASDITAMVA YTNRVIYLNDGEVVDITRDSY TITDRHSNMLDKQVDEITWELGAI  
KSGFMHYMEKEIFEQPDSIARAMSGRIDEENATAKLGGLNLSRRQLADVHRVRIIAAGTS  
WHAGMTGSYLLEQAARIPAQAELASELRYPVENDSLWVVSQSGETADSLYAMREVQ  
RKGATVLGICNVVGSTIARES DGGVYVHSGPEIAVASTKAFTSQLTAFYLF TLLMARMRD  
MSREEGQKFTRSLLA VPD MVRNALAQRDHIQAI AKKYCRAKDFLYLGRGILYPIALEGAL  
KLKEISYIHAEGYSAGEMKHGPIALISPEVPSVFLVSDDYLHEKTISNIREIKARGGPII  
AVGVEGDTEAMALADDFIAPKADPRFYFPSMVVPLQLFAYFCALELGRDVDQPRNLAKS  
VTVE\*

>SPBIB\_v1\_10058|ID:27161820| conserved exported protein of unknown function [Uncultured spirochete bib]  
MKNPAWRMLPIVVFAVAMIGALAFNIALVSRSRALASTILRN PATVRTARFHIAAIIPD  
AVDPFYGHLVEGLREEADRQNAALQVFYYSASAIGEGSNPSEEVWRWF EIALRSKTDGII  
LFQSKGMETS RFAAEAE SAAMPFVPLAMDAPAQWTRSGVSGDSFSQGKEASSLVLGLLGS  
AARIGIILSADTSQGYAQAEFPYRGV VEMIKNRPGA AIVAAVREESILGGEDACARML  
SSHDPINAILCIDAKATIGAAQVIIDRGIVGQVVIIGSDENSEVNRLIEKGVVHASIVRD  
AAAMGRSAVALAVGQRIGIRKPERISVGYHV KPERGTTP\*

>SPBIB\_v1\_10059|ID:27161821| Signal transduction histidine kinase, LytS [Uncultured spirochete bib]  
MIDLVSLARPWKPRRQGLRNRIIVNSIILLVLVIATS YTAFAFDLARSVELLFRNSI  
SMEELRATLRETQESLTGYLSAKNSESLKDFIRTSTSLSNMKLRLNKENKVDDVFLLEKD  
LAFLVDSYLVSAEGAVQAKRGRNVTQYVSLYEEARRTASLIEFLSAKMDTIHLGQSLKGF  
SSYRANISLALVSNVLLLA AFLLSIALIARYSYTITEPLARLSVAAEAVGRGEYDHPLP  
PYENEDEIRTLHDAFVNMQDSVQKAF AELTRKAELERSLMEERMRLVLT YQHRLKDAELLA  
LQTQINPHFLYNTLSAGWQLALAE GNEKTAEFLEKLA AFIRYALKPSTRFVLVSEEIECV  
RQYIWLLKLRFGERYRFRIEVQDEALGNETPALVLQPLVENAIAHGLRDIEEGGDVIVSA  
RIEGETIRLSVSDSGKGM AKDDIARALSAADPEDTTPQRGIGLHNVRRVALATGGLGKV  
EIESEPHGTRITIVLPV GKPI\*

>SPBIB\_v1\_10060|ID:27161822| Two component transcriptional regulator, AraC family [Uncultured spirochete bib]  
MKRVLVVDDEMPIVNGLLLLFKRYFQTEYTVVGVAQSGREAIEKAKELAPDIILMDVQMP  
GITGLDAIRELSRQKSATAFILVTAYERFDIAREALSMGVCDYLLKPVSRERLEIALRVA  
SDYLDRSRLFDKRELEFRDRQQLVPLIRTAFFCSVRWQELKKNLGLVKEMLKINEDAG  
VLGIASFSPMDGNAGALYERFCSLIQYKTVALVGPLEDNRYCAWFLPMKKAALSESIAA  
SEISAFILGILRGAFSSELATGEIVLAHGQPEILENLSWSAAVQVFAGSTLIPKKGSDI  
AGISAAVGSIVQPQVNLEIQLSEWEKNHASCALDAQFSEEIMEGQYAMAGQSLEKMLMQ  
IDCSHTAARDSLFRIIAALSFAALKLAGGGILSEQVYREFMDFSDIEQLWNQAACHLFAA  
KVRERFASLQKYAVAAGSHSPFVVRVRAIQYIENHYQEPITLESAAEAIGISAGHLTRLMSD  
ELKKGFARTLIDYRLQKAKEMLKKNVSVRDVSRLCGYSDANYFARLFRRMTGVSPSKYS  
ARKSGGEESDA\*

>SPBIB\_v1\_10061|ID:27161823|xylF| D-xylose transporter subunit ; periplasmic-binding component of ABC superfamily [Uncultured spirochete bib]  
MHNAKHMLQHGPKHVHQFGNFYFSLILFAASLSLNLVSCSKARKPIGDRAPIVGFSLD  
SLVVERWRRDVSFTKAAHDLGAEVVLRVANQDANTQISQVKELLNQGIDALVIIPNDAE  
KLTEVCREAKRRGVPVMSYDRLVHNADVLDYISFDNEKVGSLQAQAASEAVPSGTYYIIVN  
GAITDNNAFMINKGFHTVLDPLIQSGRIRLAGEIWPWDWISDEVTRTFETLLQPGQKIDA  
VLCGNDMLAETVISVLSENRMVGTIVTGQDAELAACQRIAEQSQFATYKPIDALALKA  
AGFAVMMARGEKVRVYDNKIDDGHYKVPYIALEPILVTAKTLGSTVIKDGTFHTREDVYRNV  
KR\*

>SPBIB\_v1\_10062|ID:27161824| Periplasmic sugar-binding protein [Uncultured spirochete bib]  
MKRTLFIALLFTVVAGFVFADTQVGIVLPTKDEPRWIQDQTRFLDALKSAGFSKVLFSQ  
GDSAKEKANVEALISEKIKVLIICPDGTAADLAHKAAGVVKVISYDRLIRDTTSDY  
YVTFDSFMVGKAWGDYLSKVPAGSKGNNLYLYAGAASDNNAFIFEGAWSALQPKIADG  
TYIVRNSDKAVALKNKAKLTRDEEAQIIGQVTTNWNFNDAKNKAEANLTAAPKEAKGTVY  
ICAPNDGTARAIADAFADKDVKTYITGQDAEIASIQYIIDGKQSMTVLKDVRTLVNDA  
INAAVAYMKGQTPPVTSYYNNGKKDVPKPTAIVTVTKDNVKEIVDSGYWPADKFTGLK  
\*

>SPBIB\_v1\_10063|ID:27161825|xylG| fused D-xylose transporter subunits of ABC superfamily: ATP-binding components [Uncultured spirochete bib]  
MSDNILEMRHITKTFPGVRALNDVNFVRRGEIHCLVGENGAGKSTLMKVLVSGVYPHTEF  
EGEILNGKKVAFSGIHDSEKAGIGIYQELALVPEMMVYENLMLGHEIRRGITIDTPEM  
IRKAEELLKRVRLSVNPSAKIKDLGIGKQQLVEIAKALSARNVSLILDEPTAALNEDDCD  
NLLDILRLLKSQGVTCIMISHKLKEVLEIAETITVLRDGTICTLDRQKDEVNEQVLIKH  
MVGRSINIYPPRTTKPSDEILLEVHNWSAFDVNLGRQVLHNVNFHVRKGEVVGLSGLVG  
SGRTELARSLFGNPDGYITTGEMIFKGGKQVFRHPRHAIRAGLAYATEDRKRNGLVLIQS  
IQHNISLANLQGVSKNGIVNEELDKQNAVNFVRSLSIKTPGIHQVMNLSGGNQQKVSVA  
KWLFGVGPDLIFDEPTRGIDVGAKYEIYTIINDLVAKGMSILMISSELPEILGMSDRIYV  
VANGTITGELDAKTATQEAVMRLATQY\*

>SPBIB\_v1\_10064|ID:27161826|xylH| Xylose transport system permease protein XylH [Uncultured spirochete bib]  
MNELLTVLKKNVREYGMIALAVIMAVFTILSKGLFISSRNIANLLNQTGYIAVLAVGMT  
LVIVIRHIDLSVGFLSGFLGAVAAIALTQWNWPVWL TILLVLLGTIAGLVTAFPVAQLG  
IPAFVASLAGWLIYRGALMLVTAATGTIIVPNESFNAIGNGYIPDLFASASFLPNVHKTT  
LLGAVAVLFIIGQISDRRKLQYNFEVLSTGLFTAKLLFISVVLGFITWILAGYNGMS  
WTVVIMVAVVLVYYFITQRTVIGRHIYAVGGNPEAAELSGIDVKRITMAVFASMGFLAAL  
SGILFTARLKSATPQAGQLFEMDAIAASYIGGVSAAGGIGSVTGSLVGALVYMSLMNGMN  
LLGTDISLQYIIRGLVLLFAVIFDVMTRKRKS\*

>SPBIB\_v1\_10065|ID:27161827| Major facilitator superfamily MFS\_1 [Uncultured spirochete bib]  
MKEKTKEIAVKGARSTFWIMFCMMLLHQADKLLIGPLTTQIMDTFKISRTQMGAVTTGAL  
IVGAIFYPIWGWLYDKFSRPKLIALASFLWGASTWLNIAIPTYPIFLATRAAGTGIDDSSY  
PGLYSLISDYPPKRGKIYGFLQVAQPPGYLVGMILALAFGAVYGVWRNVFYLTGSLGIV  
VSFIIFLVKDRPRGSTEPELSSVEHLERFKFSWKTVGGLFRKKSLILFVQGFIVFPW  
NVITYWFFDYKTERGYSDTQTLTMVPAVLILAAGYPLGGALGDRLFKKTPKGRVIVGA  
AGVAIGAVLLWITMNIPLAAHLPGFIMLCATALFIPFASPNVLSFYDVTEPEIRSTTNA



VQNFIEAAGSALAPLMAGIADKSTLGNAILLICTVAWAACFAFFIFAGRFIPKDIADLK  
EKLAARAAAGSV\*

>SPBIB\_v1\_20001|ID:27161828| Extracellular solute-binding protein family 1 [Uncultured spirochete bib]  
MKKNLAIVAVLMLCGAMLFAAPAKKITVLGVWGGQELDVFNAMCKAFTDKTGTGIQVDFEGT  
RDLDAVITTRVEAGNPPDVAGLTGPGKMIELANKGKLADLSKILDMNAFSKNYAQGWKDL  
GSVNGKLYGIFMKA AVKGLVWYNPKAMKAAGLEPKNGWTWDDMLAASAKIQAMGKTPWA  
VGIESGSASGWVGTDWIENIFLRQNGPQMYKDWYEGKVSWSPEIKKAWQTFGQIVADPK  
MAYGGAAYINSTNFGNAAAPLFQEPQAYFHMQASFIQSFIMNQFPNAKPVTDNFVGF  
SINTKYSKAMEVAADLFVAFRSTPEVKEFMNYIASAEAQAFWAAGTGGLGTNRNVALTFY  
PDALTKRAASLLNDTEIVVFDASDMMKPEMNAFWSAVVSYV NKPSDLD SILANLEKVRK  
DAYKN\*

>SPBIB\_v1\_20002|ID:27161829|ag|F| Alpha-glucoside transport system permease protein AglF [Uncultured spirochete  
bib]

MNSQTILMLAVVVLGVPLLLVGYITLSERLLGSAAHKRSSSVRAIFWIAPAVVLLVVFLV  
YPIITTIILSLKDAASRGYVGLANYKYVFTDRNMLLVLRRNNLLWLVFLTLVTLTFGLLIA  
LLADRVKYEAVAKSIVFLPMAISFVAAGIIWKFMDFQAPAGAPQIGTVNAVFS AVIPGYQ  
PQAWLFNTATNNIALIVVGIWMWTGFAMVILSAGIKGIPTDVLEAARIDGANEFQIFRFV  
TMPLLAAPTITVVATTLIIDVLKIFDIVYVMTNGNLNTEVIANRMYKEMFNHNYGRASAI  
AVILLVAIIPVMIMNIKRFRQGGANA\*

>SPBIB\_v1\_20003|ID:27161830| ABC-type transporter, integral membrane subunit [Uncultured spirochete bib]

MHKHTSSKRPLSRFILHLILVICAGWL VPSLGLLVSSFRPRNLISTTGWWTALLPPFKF  
TLSNYAYVLTRGHMGISFINSLI AIPSTVMPILIAFAAYAFAWMRFPFKETIFLVIIG  
LLVVPLQLTLIPVLKLFNALGMTGSFVAIWLAHTGYGLPFAIYLLRNFMQDLPGSVLESA  
YLDGATHPQIFFRLIIPMSVPAIASLAIFQFMVWVNDLLIALIYLGQTQSVAPMTVTMSN  
MVNSYGGGWEYLTA AAFISMLLPMLVFFTLQKYFVRGILAGSVKG\*

>SPBIB\_v1\_20004|ID:27161831| Transcriptional regulator, LacI family [Uncultured spirochete bib]

MGNRKRKSISQEEIARIAGVSR TTVSFVLNNTRGKSISEETRQRVIVA AAKEFGYMPDMSA  
VETATSRDGSICLIVCHSESAFSDAYIMRLIEGMSRPIHKERYDLRVLHFRVSRHDYLET  
ARKGSFDGAILLNTHADDPGIAELEASNLPFVIIGALPDKGLIQIDIDNSEAAAGVARYL  
LSLGHNRNIGVIAHAPETFFAVRARLAGFCGEMRRNGVEMCDSNIRFANFTEESGYEAARD  
LLSSKQPLTAIFGTNDVVAYGIMRAVEDAGLAIPDDISVVGFDYDLYSLYTNPPLTTVTL  
PAEGIGRTAAETLLRLIRGAPVHRGLRLLPTNL TIRQSCRKV\*

>SPBIB\_v1\_20005|ID:27161832| Beta-phosphoglucomutase [Uncultured spirochete bib]

MARCIAQTSFDPARAALYESLFMVGNGHFGIRGSDEERRHSVYRGTFINGFFEKKPIQYG  
EWAYGYARNHQ TILNVIDAASIELEVDGSPLDFSSGLKTYERCLDLDAGKLVRRLEWESP  
SGVLIRVNSERLASFEKAEIAAMRYE VSPDAACSIKLVSFLDGSVRNRP AEAGDPRVGS  
IDANPILWCKVEARDGALLAGTTVRSGLGLAVVRHVVSFSGSSILRAEHSAGGETLFS  
SYCADCAGGERFRLDKFVAVVNGSADA IAKRLADEARAAAEDAANRGYDEIAALQADYLRT  
FWAGADIQIQGDPKMEEGLRFNIFHLLQSAGRDGRTSIAAKGLSGEGYEGHYFWDTEIYA  
LPFFDYEA PAIARSLVRYRIGILGKARERARELSLPGVLPWRTIDGEETSAYYPAGTAQ  
FHIDADIA YALMRYVEATGERGILLEGGAELLFETARLWMGLGFFNPRKEKKKFCIPCVTG  
PDEY TALVDNNAYTNLMAEFNLRHAWKVATELQDQHPEEFSALAERIGLSPSEIGEWKKA  
ADMMYLPFDKETGIVPQDDQFMDRPAWNL AETPREQFPLLLHYHPLMIYRRQVLKQPDTV  
LAMFLRHERFSLAEKMRNFRFYEPLTTGDSSLSHC IQSVAAAECGETGKAYEYFAKTARM  
DLDDVHGNSRDGVHIAAMAGSWISV VYGFAGMREGRDCLSRPMLPPAWKRLAFSIGWRG  
SRIACEYTAETSTYSLVWGTEIDIEHEGKRYHLASGAPVCIDERPKPLVWIFDLDGVIAD  
TAVLHTRAWMRLADELGIPFRPETGELVKGVS RMASLCIVLGDHAAEYDAESLAELADRK  
NCYYRELVEHVGPSDILPGMADLLASLKN DGRMLVLASASRNAPAIKQLGLEGTFDGIV  
DAAA VSMPKPDPEIFIRAAEMAGARLKDCVAFEDAQAGIDAIRAAGIFS VGIGTKLVGAD  
IRFDSTSLVDRKAIEDAFYKRG\*

>SPBIB\_v1\_20006|ID:27161833| conserved protein of unknown function [Uncultured spirochete bib]

VVKSVVSTVHFDVMDL PFSRRGSWLAISWIKASDPTRHVPEGLYLRTVDRGDYQQLFRI  
DLPADGGREIRAEASPSIMHLFP GGTKSERSGVVDVCIPTTSSVRFRRGRGTLRLSSIPG  
PELSYAI PRGEGSWIVNMLGAGLRLMLT PLRGLKHVDAPWQAQGSQPMRFEMHPDIAGEF

DIVIEEFAQALTPKRLHPPFEDEAAAVEADFLAFAARHGEGPFSETADIARYILWSCIV  
NPEGAITRPTVLATKDRLTGIWSWDHCFTALALCPGDPALAWNQIMTIFDHQDEFGLPD  
AVFDRRVVQNFTKPPVHGWAIGRMLKLGCLDRAMKEEA YLHLARWTDFFWFSYRDYDGDGV  
PQYDHGNDSGWDNASPFIFRPPLEAPDLATFLILQMDTLAVLADELERSKEAIAWREKST  
AFLRLATSHLTRRGRMGFVASGTHEEIPNESLLPYLQLLLGNRLTESTRTSLLKSLEEEG  
YITQWGIATESTLSQNYSSDG YWLGPWAPSTFLMVDALFRSGENLAKEIGSRFLDLVE  
TSGFAENFDAITGAPLRDRAFAWTASTYLILARDISARP\*

>SPBIB\_v1\_20007|ID:27161834| Basic membrane lipoprotein [Uncultured spirochete bib]  
MRNISRFFLLMLIAIVAGSAAFAQSAPPAAGPNLTIGLVMVGPYNDHGWSQANYDGVQYV  
LAKVPGTKLVYIDKANSADRPGTTVSQLGESLVAQGAQLVIFSSDDMTDEAIKFAQDHKD  
IFVILTSGSQWKEGKDYKPLPNMINIMGRMEYMKMVAGVAAAMTTKTGKIGFLGPLIND  
ETRRLAASAYLGARYAWVNYLKKDKPAKLTFKVTWIGFWFNIPGVTSDPTQVADDFNSGF  
DVVISGIDTTEAVAEAAKYTAQGGKQVWAIPYDYSKAIDEGKGVSLGVPYFNWGPAYANAA  
KAAMNGTWKNHFENWNGPDWKNINNPDTSAVGFNKGTLSEASAAIDKFIDELGKGLNLWT  
GPLNYQDGSVFLKKGEKATDQIQIYLPQLLQGMEGQSVSK\*

>SPBIB\_v1\_20008|ID:27161835| conserved protein of unknown function [Uncultured spirochete bib]  
MERGRKKVAMHIELRGITKCFGALRANDNISFAVPPSSIHGILGENGAGKSTLMKILSGF  
YSPDSGDILLDGKKVRIASPADAIRHGIGMLHQDPLDFPPLKVIDDFILGSKGNLIPNHK  
SATREFRELAARFGFSIDPESYVDTLTVGERQQLEILRLLWLGARALILDEPTTGISLPQ  
KEKLFATLKKLASEGMTILFVSHKLEDVEALCNKVS VLRQGLVGSVDPPFATGALVEMM  
FGKEIALEPKAQLRFGSNVLHIKHVDLEGIRIQIKGLDLQVRAGEVIGLAGMEGSGQTLF  
LGACAGLAQPVGGSFCLDEDEKDMTGRTYHEFRKHGVAYLPAARLEQALVPGLTLTEHFI  
LSEGMKGLFIDRKKAEALAKSRIQVFNIKGRPDSTVESLSGGNQQRALLALMRDPLKLIL  
VEHPTRGLDIESTIYIWNKLKERCARGTSIIFISADLDEILKYSDRVLVFFAGRVSPPLE  
ASTLSVERLGRLLIGGKDWETLETEAHA\*

>SPBIB\_v1\_20009|ID:27161836| ABC-type uncharacterized transport system, permease component [Uncultured spirochete bib]  
MRDSRATRLLFKVGAILFALIVTTGVLFLAKAQPFAYKYITL GALGSWDVVTNVFVSWV  
PLLLATSGLLVTFTVGLWNIGIEGQITLGAIFTTWAMRLLHSGWNPTLILMLAVLAGML  
GGALWAMLGALKTFGGVNEIFGGLGLNFVATALNIWLIFGPWKRPGVASMSGTIPFDRS  
LWMPAQGSSRLTPATLVMAIVGILVVYAMIEGTYFGLRLKAVGKNARSAHILGIPTWQY  
MMSSFAVCGIFAGVAGAVQVTVAVYHRLIPSISG YGYLGLMVAMLVGYRASLAAPVALFF  
AALNVGSIQLPIVLKLDSSLAGVLQGTLLVLFVVLGQGVRSRILKKT KVKS\*

>SPBIB\_v1\_20010|ID:27161837| Inner-membrane translocator [Uncultured spirochete bib]  
MNNSALFVSLGGVLSAAPVLFVAVIGETISERAGVLNLSMNGMILLSAMGSFAVALSTGS  
VVLGFLAGALIGALVSLVVVFASLTLLQSQVAVGFVLALLCRDLSYFLGSPIMGQVGPRI  
SQLPIPGLEQIPVLGTILFRQDMMTYLSFILVILAWFFIFKTRPGLTLRGIGERPAAAFV  
RGANVNRLRYLYAVLGGAIAGLAGPIYSLSVKAGWKGTISGLDGIGWIVLSITIFGGWKP  
FRAAFGAYLFAFLQWLGLVLQPSLPSVPSQVLQVAPFLMILTLLFVNIGNAEWVERS LA  
RLPENVRRIA KVL RAMNATPPAALGV PFEKE\*

>SPBIB\_v1\_20011|ID:27161838| Branched-chain amino acid ABC transporter, amino acid-binding protein (TC 3.A.1.4.1) [Uncultured spirochete bib]  
MKKLLFAALAIALVLAGCSSGGKSDVIKVGWLGALTGDQAVWGENELNTVKMLFEEYNAA  
GGIDVGGK KYKLEVIGYDNKGDPQEA VNVTKRLTGQDKVVAIIGPNSGNAIPMAPILEK  
AKVPDIATVATNPKVTVQDGKVKPYNFRVCFIDPYQGA VAAGFAYDRLGART AALLYDVG  
DDYSQGLREFFKLNFEKKGKIVADESFNSGDVDFRPQLSKIKAA NP DVIFMPYFFKEVA  
LSANQARDLG I KQVLMGGDGWPSDQLISMGGKAVEGSYFVNHLDYADPAVQDFKTRYKAK  
YGKETELNGFLAHDAVLLLVEGLKKAGKVNGEALAKAFEGIDVQGITGRIHISPETHNPE  
GKDAAIKIVDGQYVFQEKYAAQ\*

>SPBIB\_v1\_20012|ID:27161839| High-affinity branched-chain amino acid transport system permease protein LivH (TC 3.A.1.4.1) [Uncultured spirochete bib]  
MVQFLQQLINGLSIGSVYALMAVGYSLVYSIMNFSNFAHGGVIMLGAYFGFFSLTLLKLP  
FVVAFLASVGTLAVAIIVERIAYKPLRERKAPFLYFIISAMGASILLENIVIA TIGPTF  
RTYPEVFSKVPITLGPLAIGRLDLIIFAISAVCLTLLILFIEKTKIGKAIQAASYNVKAC

ALMGVNTDRVILTVFGLGGFLAGVAGVFFGMKYTVYPQIGNITTKSFIAAVFGGLGSLPG  
AVLGSVILGTIETFVAGYLSSQFRDLIAFVILIAVLVLRPTGIMGKVTEDKA\*

>SPBIB\_v1\_20013|ID:27161840| Inner-membrane translocator [Uncultured spirochete bib]  
MSWTYIQGILMLAGINMIAVLGLSLLTGFTGLFSFGHAGFMAIGAYVGAWISASPASTPA  
GLGLPFILAIVGGGAAAGIVSYFIGRISLNLKGDYFCIATLGFGEAIRLIFNNVNRFGGA  
RGWPGVPRSTFLVILIADVIAILFLANLVKSRHGRNMIAVREEELAAQIAGINVFRYKM  
ISLIISAVYAGVAGVFFAHYMTFIQPKMFSLTKSTELTIIVIFGGLGSISGSVLGALVLT  
ALPELLRAFEIWRLVFYGA AVILIMVSRPKGLMGMELTPSGIRKVL AERNALREAKTKL  
LADAQSGEED\*

>SPBIB\_v1\_20014|ID:27161841|livG| leucine/isoleucine/valine transporter subunit ; ATP-binding component of ABC  
superfamily [Uncultured spirochete bib]

MAPILSIRNLTKKFGGLTAVGDVDFDVPESIVGLIGPNGAGKTTIFNLITGVYKPTSGT  
IEFREKSILGLEPYRIADMGITRTFQNI RLFKNLTVFENVLTACHMNASY SFAEAILRLP  
RFRTQEKALVAKAENLLEIMGLMGYRDLVANNLPYGLQRRLEIVRALALNPVLLLLDEPA  
AGMNPDETEQLMRLIGRIRNDFSLSVL VIEHHMDLIMGVCEHIVLNFGEKIAEGTADDEV  
SRSPQVIEAYLGTSLEAADA\*

>SPBIB\_v1\_20015|ID:27161842|livF| leucine/isoleucine/valine transporter subunit ; ATP-binding component of ABC  
superfamily [Uncultured spirochete bib]

MLEVQNLHVAYGGIRALKGVSLSVQKGEIVTIIGANGAGKSTLLNTISGFLKPVRGSVLY  
NGSALPRRPDLIVKSGICHVPEGR LIFANLSVQDNMLGAYLRNDKKAIQADLEKVF AIF  
PRLKEREEQRAGT LSGGEQQMLAMGRALMTNGEFILMDEPSLGLAPLLVQTVFEIIFR  
SMGKTILLVEQNAFKALQVADRAYILEQ GKIVKEGSARELARDPAVKEAYLGSRSRGGG\*

>SPBIB\_v1\_20016|ID:27161843| Peptidase M20 [Uncultured spirochete bib]

MNIAEKLSQLVKFRTVSSFDPEEEDDGPFAALIAALPELPLAHARLERICIGSRGIVYR  
WQGTDP SLKPAIFCAHFDVVPASETDAWDEPPFSGAIRNGYVWGRGTQDIKVQLACILES  
AEQLAANGFQPQRTL YFAFGGDEEVGGTRGAGAIKWFSEQHIHASWVIDEGSPVGQGLV  
GFVRKPLALIGIAEKGYADIIIEAQGGGHASMPPRHTALGA VAHALAAIEDNPF PARLT  
KTTDGF LAALAPHAIAPYKQIFALRRILSPFILKA FSAMPSTNAMVVRTTCAATMAQASPK  
ENVLPTLAQAAVNVRMIPGMSSAEVVEHFNLLASPGAKAYIKFPEHMVEASEESSTSSE  
GWIAIAKAVSEAFPEAVPAPFLFTASTDTKHYRALTDDIYRFTPLIQTQEDIAAVHNVNE  
KVSIENTLERCVRFYRSLMQGC\*

>SPBIB\_v1\_20017|ID:27161844| exported protein of unknown function [Uncultured spirochete bib]

MNSTRFTNPAAVILAAGRSSRMGATKPLMLIDDMPMLMYAANAFRAAGIDYIIIVVTGFDA  
ERVAALAREGALHPVHNSNFDKGMFTSVCAGIEAVPDEFDSAFVLPVDIPFVSPETLKR L  
QTSANREHGASAKERGAPSAGGIDGMPAAARSRPVIVPRHTGKPGHPPLIHR SIFGQLRG  
WRGPHGLGGFLKAQSSLVAYLDVEDPFILRDIDTPDDMQKIISDRNLHGVAMPHS\*

>SPBIB\_v1\_20018|ID:27161845| putative XshC-Cox1-family protein [Uncultured spirochete bib]

MSELRKWIAARLRRGETV VLA AVTRVSGSTSRGTDALLAMDSTGAMNGTVGGGFTEGQTI  
EAARRMLGLGGSQAGAQT TTAQPPGASQDLDFDLTPETNQTQMICGGRLRIHLEKLEPQS  
AAARALLACIDSVENGRPGAFVVVKTHCAQYSFALDNRGNDAVIPAPLLASLRANMPGF  
EGAAEFEIEDPSNAVHETAHVFWLGLLPDPVVYIFGAGHVGKAVCDFASLAGFRVIVTDD  
RPEMLTTERFPHASDLRLIHSFEDALTDASGAPAVSIGPQDCALVLRKPDIDKAMLAQV  
LHTNAGYIGLIGSKSKRDGVFAALKAEGFADTDIARVHAPIGLAIGARTPEEIAVSILAE  
IIAVRAGIPATASISPHSGAQAPASTKVASR\*

>SPBIB\_v1\_20019|ID:27161846| Aldehyde oxidase and xanthine dehydrogenase molybdopterin binding protein  
[Uncultured spirochete bib]

MRDYHTSTPPASTKELDATQKFNVVAHNISKVDGEGLVLRPAYTDDLAPQNALYVKLVR  
SPHAFARILSIDASEALKMPGVACVLTWKDCPRIPITRAGQGNPEPSPHDRFILDEYVRY  
VGDEVA VVA AENEATAEKAASLIKVDYQVLEPILDFEKALDNPIIIHPEPEIHEMFPIGF  
EPKRNIAAA YHMEIGDVEKELATSPVTVETT VHTQAQQHVALEPHTAFSYLDIQGRLVIV  
TSTQNPWHTRRLGLAFQMPLRQIRIVKPRIGGGFGGKQHIHIEPYVAMVTMKTGKPARL  
ALTRREVF EATFTRHEMRVKVRLGADPDGALRAIDMQVLSNTGAYGEHALTTFMVAGSKT  
LPLYNKVKA VRFGGHVYTNKVSAGAYRGYGAIQGLTGLESAMDELAHKLGMDPVELRRK  
NMLHEGETSEVFRIMGEGTEGVAMIIESCKLEECIRRGKELIGWDPHTLVQEVA PSK VRA

KGMAIAMQGSIGPLVDMGSARIELQDGGFFKLHV GATDLGTGSDTILAQIAAEELGVDMK  
DIVIHSSDTHDTPFDVGAYASSTTYVSGSAVLRAARSLKQKLEAVSLKFGVRPQDLTFE  
DKVVRTIDGSKELSLNDFS YDTLYHDGAKMKTIEATESFSGDKSPPPYLA AFVEIELDKE  
TGKVDVVNYVAVADVGT PINPNLAKIQIEGGLLQGIGMALYEDVRYSKGHMLSHNMMTY  
AIPSRVDVGRITVELVDSYEPSGPF GAKSAGEIGIDTPPAAIANAIRNATGVRLTQYPFT  
PERVLMAIRQA EKGGKQT\*

>SPBIB\_v1\_20020|ID:27161847|xdhC| Xanthine dehydrogenase iron-sulfur-binding subunit [Uncultured spirochete bib]

MIITLYINGK KESVECQPGEML TEVLRRAGYVEVKKGC DTGNCGVCTV LLEGKPVLS CSY  
LAIRADGKQITTIQGA AKEAEFAHFLTAEGADQCGFCAPGFALT VLAMKKELPNPSEGE  
IRHYLAGNLCRCSGYEGQIRAIKKYLEAEHA\*

>SPBIB\_v1\_20021|ID:27161848| Molybdopter in dehydrogenase FAD-binding protein [Uncultured spirochete bib]

MEILEFASPRTLDEALHLVRDRHGTAIGGAAWLRMNTKTMPLGVLDSELGLDYIREANGS  
IEIGAMTTYRELETSPLLEARFGALFRNTVSHIVGIQLRNITVGGTLAGRYGFSDLNTT  
LCALGAKVVFYPGKIADVASF IQDGE EWPF LIEKVLLPVSARASYQQMRITANDFP IINA  
AAAWTGSSWRIA VGSRPAASRLCKKAMVLLGN EPYPSDEKIGQA AVAAAEELQFGSDIRA  
SAEYRREILPALMRALMEVRG\*

>SPBIB\_v1\_20022|ID:27161849|dnaE| DNA polymerase III subunit alpha [Uncultured spirochete bib]

MLLAEVKNHLLPVFRIIAQVSKMGKLG YTGIMAEFVHLHNHTDYSLLDGAAPVQKLIKKA  
KEFGMPALAITDHGNMFGVMAFQDECRKAGIKPIIGCEFVYVAGGSRLEKTGTENGNKYWH  
LILIAENQTGYHNLLKLT SRSFTEGFYKPRIDDELLAAHSEGLIASTAC LAGEIPSLIL  
AGKIEQA AKKIGYYKEIFGPDHFYLELQDHGLDEQRIVN KELIRLSKLLDAPL VATNDLH  
YVEREDAVAQDILLCIGTNRKRNDPSRMRFPNDQFYLKSPDEMAALFSEVPEALANTLKI  
NEMAQLEIEFFGPLL PDYQVPESFSDPDDYLRHIAREGLAKRYPNPSPEATARLEYELDV  
ITKMGTGYFLIVWDFIHWAKEHGIPVGPGRGSGAGSIVAYAMRITDIDPLKYDLLFERF  
LNPERVSMPDFD VDFDFERRGEVIEYVAQKYGQNRVAQIITFGTLKAKAVIKDVARALDI  
PFEEANQIAKLVPDDPKMTLAKAFKMEPKLAALAE NPSYAELFSIAARLENLHRHSSLHA  
AGIVISKSELTDYVPLYKDPKTGLVATQYTM EYLENCGLVKMDFLGLKTLTLIRNTLDIL  
RRRGIDIDE EKIPDNDPKTFKMLSE GKSTSIFQFESQGMQSILKRAK PSSIEDLIALNAL  
YRPGPMDFIDQFINSKNGKMAIEYPHPSLEKYLKGT YGVIVYQEQVMQVAREVAGYSLGR  
ADLLRRAMGKKKPEILQKEEGPFIEG AISRGYSREDAKRIFEILTPFAGYGFNKSHAAAY  
SVVAYRTAYL KANYPAEFMAANLTNEISNTDKL TEYISEARAMGLSVLPPDINRSDANFS  
VDHGQIIYGFLGIKGVGEGIAKAIQLEREQNGRFSDFIDFLSRMSPAGLNRKTLES LILA  
GCFDSMKHKRREL VQNLERAIEYVEGKRAFEASRQGS LFELEDMPYPAFQFEP ADEFSN  
QEMLQAEKELLGFFFS AHPMDEYRTI WERSSTLDLGR LDQASANREYTVIGLLKEFRHTT  
TQNGKRMAFGKLEDYHGSIDIVFPDMLEKNEQAFIKDRVLCVSGMYDNSRRAPSLKIQA  
ILDPESLRKASWRELHIRLANSVRATGQAGFTDRAEPSQASAI FDETSLYQLRDAIYSLH  
GQCKVLFHVPLIKGGEAVIEAGPHTTCSANDSDLEFLKGQPAVAEVWRS\*

>SPBIB\_v1\_20023|ID:27161850| putative Ribonuclease Z [Uncultured spirochete bib]

MKIRILNGGGFYNEGLPYNAIAIDGHVLIETPPDILQSLNHSDMRPSQIDTVFISHIHGD  
HCFGFPFFFNWLYAGEADSHYEKGSMLAIIGPAGLREHLLALLRLAIPPEHQYIRDFSE  
RAKLVEVDEGDIIAVKGNIWFSFMRTKHSLPTLSLIAGATAGPPSPKRALKEALFAYSS  
DTAMFEGIH TLLES GAKLILCDTNGEKESDVHMSPAQLIAAARVHGLAGNSGRLLLGTHM  
SRRIVSQENLRFAQDGEEFSVI\*

>SPBIB\_v1\_20024|ID:27161851| putative hydrolase of the HAD superfamily [Uncultured spirochete bib]

LYIFLMQQRVRFRAV VFDVDGTLYPASALYLR CIDIFVRHPRLVEGFSVVRKELRTLQMR  
SDYTPRDAEELHQLQASLLAQRMHIPQDQVRKLMEFFFYATLPERFASIRPFSGVRNAIE  
TIRRSGLI AVALSDLPTEKIEALGLSDLLEHALCAEEFGVLKPHPWVFAALIERLGYAP  
SEILYVGNPNVYDIQGAKNAGMAAARCGRPTALADFSFTKWK NLADWVLTNRA\*

>SPBIB\_v1\_20025|ID:27161852|hndD| NADP-reducing hydrogenase subunit HndC [Uncultured spirochete bib]

MEEQLIEITIDGQNV RVDPSANIVEACAHAGVKIPTLCY LKGISQNASCGVCVVEVEGAK  
SLVRSCVQKPVPGMKIRTSSPRVIRARKTAV ELLANHPDDCLSCIRSDTCELHTIANIL  
EVRADRFPGYKKYMPD TTSEGIVRDDS KCILCGRCVAVCEETQGVHAI AFSGRGARTRV  
STFLDRGLAQ SACVQCQC SVVCPTGAITEKDESREVFSAIEDPRLTVVVQTAPAIRASL

GEALGLPAGSLVTGQMVAALRRLLGFNRVFDTQFTADLTIMEEGSELLERLSKGGTLP MIT  
SCSPGWINFIEGFYPDLLSHLSTCKSPQQMFGSVAKTYAKKAGLTPDHMRVVSIMPCTA  
KKYEARRKEMDGAWGWWKEQDPGKVPARPFVDVWALTTRELARMIKLAGIDISRLPEEE  
FDDPLGQSTGAGTIFGTTGGVMEALRTVYELVEKKPLENIEFTKVRGF EAIKTAEVVVG  
GSPVRVAVAHGLANARVLLDEIRAGKSPYHFIEIMSCPGGC VGGGGQPVLADLEKKLARS  
QALYEEDRKLAIKSHENPAVRALYQEFGLKPLGHL SHELLHTSYKARVF\*

>SPBIB\_v1\_20026|ID:27161853| NADH-quinone oxidoreductase subunit F 2 [Uncultured spirochete bib]  
MKNASDLGFLAQTGLARIHGDKPWISVGMGTGIGSGADKVWEILNQKAKASEILVRRVG  
CFGFCAAEPVMTWMPGKPVLFFTDVDEQKTRRILGGLENSASYDKIAKLAEAKIEEWF  
RTSKIEFGHGYAQLPAWKDLNFFKGQEKIVLRDAGLIDPESIEDYI AVGGYGS LVRALTS  
MPPEIIIEVRKSGLRGRGGAGFPTWKKWSIMRQSLDNPGEYIICNADEGDPGAYMNR  
NEIESDPHMLLEGMILGAYAMGATRGVVYVRAEYPLAVYRLTKAIEDAREHGLLGINILG  
TKFSFDIDIVTGAGAFVCGEETALIASIEGNAGRPRPRPPFPVQKGLYGRPTSINNVETW  
CNIPVIIARGGEWFAGFGTPTSTGTKVFSFVGKVRNTGLVELQLGSTLESVIYGICGGMG  
PKKKIKAVQCGGPSGGCVPASLFKTPIDYEH LAELGAIMGSGGMVMDQDNMVDVARYF  
TGFVVGESCGKCTPCREGTSQMLHILQKVS DGEATESDLDTLQDLALTVKDS SLCGLGQT  
SANPVLTTLR YFRDEYIQHIK GKRCPAGVCENLYIALCESSCPLHMNIPGYLQLLKENRI  
EDAFELTLRENPLPGTIGRICHFHCRMRCRRDMLDEPVSQGEIHRYLADTMYKMGREKQI  
YANIIKEKFPSTGKRIAIIGAGPAGLTAASYLVRLGHEVTVYEASDEPGGVLRWGIPAYR  
LPKDVLLKKEVSFIEKLGVRVYNTRIAEPEQWRRLSDSNDAIIVAAGASAELELGIPGED  
AQGVYKACNFLGMLAKKEKVHTGGEVVVIGGGNSAIDAARSALRLGATVTVVYRRSKIDM  
PANEEELKGALEEGIDLICMASPVEIVTKQKEGKKT VKA VRIQRMKAGPVDSSGRPTPIP  
TDKIDEISCSTLIVAIGE KVEIPGIESLGVERLKNGR IKADPFLVTSNPKVYAIGDATL  
GPATAAEAMGQAKTVAEIIDQALTGKKRFDQLFR RFDYRMEIPLKISKEKMTRAGMLPVN  
ARKSNFMEINLGYTGEQARIEANRCLRCDVREHRREPRGTLVRE\*

>SPBIB\_v1\_20027|ID:27161854| NADH:ubiquinone oxidoreductase 24 kD subunit [Uncultured spirochete bib]  
MTKTASNTKMPDIDSIVDSCKEKP GSLLSALEQAQQNDPRKYLSEATLRRISAKLGVPLS  
KVYSVATFY SFFSLKPQGEHVIVVCRGTACHTRGSLALLNESLSRLGIKEFK EEEENSAT  
SSDSFATIRTVACFGQCALAPVIMVDGKVLSRMTVGKLVSLIEKMKKGGEK\*

>SPBIB\_v1\_20028|ID:27161855| protein of unknown function [Uncultured spirochete bib]  
MVPPFRNRRMVRPLIILLHVAVFVKKKLSIKLYQAIFI\*

>SPBIB\_v1\_20029|ID:27161856| conserved protein of unknown function [Uncultured spirochete bib]  
MASFEWDTPGKPCSRPRWPSRFSHASVDIVARKLKKVFDQ NANTGYFSCAEIRDYSYYEN  
LLIQGLDGIDRKMTSGLLVPVDLSEYPKIIRADRGKIRACIYIGSFDPFQLTHLTVAVRF  
LASEMSTSDFVIVVPEGSPDPAKPLKTEYAFRLSIARMQVEGILDPFIKVL DLGMQADTI  
EIVRRFIGMHSGLSLELTHLIGSDVLPAAKYISEDMRIWKKEAQESGVDWRHCIHVVQR  
DEESAARPYLEKIEAENVCAMLDPHIVATPSSTDFRTKQAF TIVLPTASIRDKMEIIFRY  
RMHKSWSDDQE\*

>SPBIB\_v1\_20030|ID:27161857| adk| adenylate kinase [Uncultured spirochete bib]  
MKLVFLGPPGAGKGTISR MVSERLGIPQISTGDIFRTAVKEKTELGLKVQAILAAGGLVP  
DEL TIAIVKDRLSWPDAQRSYILDGFPR TIAQAEALAGFSSLDAAVDFEVKDELILFRLT  
GRRVCKVCGAIYHVVTKPPKVEGICDLCSGELYIRNDDKEETVKARLNAYHEETEPLIGW  
YGNRSLLLTIDGSPDAETVYN AFISEIGRFLRK\*

>SPBIB\_v1\_20031|ID:27161858| exported protein of unknown function [Uncultured spirochete bib]  
MIPKSSLAIRFLTIFLFLAAGAGGAVCAQMSSASQISPVPIAEIPAPEIPASETPVA AVP  
SFEAPAAQADTSAKIAPGTWAGKLILQP VQTGQSGNYSFDFVIRILSAGRMLVDIPEQG  
MFSYPVDRYSLNADSLSLVLDATGAE EELAFSGSYSGT FAPQGS AKKGGIVGTVRGRSWK  
GSFYVQKQEAQLKPGEMPFEVPAEGGLLPATITFPVHAAAELNPAAFASFPLVILVAGAG  
KTRNNGNNFEVPGKTD TLLQLAEGLRARNVGSFRYDRRGAAEAYMLEKSGHMTSFAQHVK  
DLAAVIRAAAALPREGR LILAGMNEGAWMALAALNQLGQDADLVDGLIMLDSSGQSPMEA  
LAGSLEDQDEEIRNTAMEAAQTLIKTGALIPVPEILADFFSPSRKEWLASWLA FDPVKEL  
KKVPVPVLLVYGENDMQVSREAF AKLADAKPSAAIKIVPGMNYVLKEVHGEDENYAAFTD  
PLFKVPAILVDLIAAFKAQAPQGLLPWSSH\*

>SPBIB\_v1\_20032|ID:27161859| protein of unknown function [Uncultured spirochete bib]

MMTFDSRNQHNQQDGEERSAEQRKYRIFALLFALTAFLVFSSCMSVPRDVAVSGLFDHF  
ERTPQVLARAESAFLRDMAASFDDSTIQALISMTSENPDNGQKPINRDRLDKTLARAEAA  
GIGISWNSKESPSIEAVFAGNFPSLFTSLSFSLDGNWKRIEGGYASKSGKLYVRDPYAGK  
LHFTTWAPEQLNNSISAASSIAERSGLLASASDLAIYLDAKSALVSQLPILDGVTLPFDG  
ILLTAERDRTSPKGANPHARYTAIFKIQMKDEQTARTYRPIRMVMWALVSGKLTALGIPV  
SPETSIEQQGSLFATTPISMSAREIVNVFLALSNMNGGKAASGLVAAPRQ\*

>SPBIB\_v1\_20033|ID:27161860| conserved protein of unknown function [Uncultured spirochete bib]  
MILRMNREFHYVVCYLARKAGFPPEHAETIALSSQMVDDSKLPWKIEGEQNSGHPHTLP  
ADQSASFMTVEVTQNYLFWDPKIARDVYLPFHFIQGDQPQLAAMKRKDRKLHPLAVTADSON  
ARALLVDALRSGNLFRIALHSYADTWAHQNFQTADPFNELEARNILPAVGHQAGTT  
PDQPQALWRDMRLAASYEDISNSARFLEAARMYRFLSTAQHKKFEDEAFVTGPLEELWL  
NRRTSKNDSLAAASDYVIYFDVPPYDPDKWFRSLEARQFDTRELLKAISAEGFGTEWLGA  
FSGQSMVVRTISISNYSDSMFAQWNAASAHRDAFMKLMHTKGIQVL\*

>SPBIB\_v1\_20034|ID:27161861|ndk| Nucleoside diphosphate kinase [Uncultured spirochete bib]  
MAIERTFAMLKPGVLSRRIAGEIISRIERKGFDIIGLKIMRITRELAEKHYAEHIGKPPF  
NELVA YITSSPVVAMVLEGDQAIKILRMMCGSTKPEEANPGTIRGDYAMHTNINIIHASD  
SPEAAAREISLFFKPEELMDWS DGNQHWI\*

>SPBIB\_v1\_20035|ID:27161862| Oligoendopeptidase, pepF/M3 family [Uncultured spirochete bib]  
MAETLNVPTWNLDDVFPGFSEKEYREAKVRIKAMLEKAKNYLVESSPPVGDAAFADWLWA  
LLAELDQIEVLADTLA YVYARFSTETKNPVVIAELNKIEELLVPATTVLVQFRNMLAQH  
EKQLKAAIASDARFAPYAFVLEEALFFQKHQMAPELEDLAADLGRSGADAWSRLQESILA  
NTSAVWDEATGERKTMVELRNLA YDPDRAVREKAYRLELGIWKS VEMPVAAALNGVKGTV  
STLNKRRGWESALEASLAQARISRATLDALIGAMEVSLPMWRRYLKAKARLLGLERVAFY  
DLFGPVERQGAMLPTFQWNEARDFIVRQFGTFDPDMAAFAAHAFEHFWIDAKPREGKSGG  
AYCTHFPAARQPRVFCNFDGSSFSLGTIAHELGHAWHYETIKDLPMLLSQYPMTLAETAS  
IFSETLVSNAAMAELDQSARLPLIEMHLQDACQVIVDILSRFYFEKAVFEERANGEITAD  
RLCALMLDAQNRTYGDAMEPELKHPYMWAVKGYHYIPSLSFYNFPYAFGQLFGVGLYQIY  
KEQGSSFARRYRELLRATGSLPAVEVARKAGFDIETPDFWLRAMSTFEEDVRFLEDEAQK  
SARE\*

>SPBIB\_v1\_20036|ID:27161863|lysS| Lysine--tRNA ligase [Uncultured spirochete bib]  
MEQKKAHWA DQTAEKIIQTWGEQERYTCASGITPSGTVHVGNFREMISVELVVRALRRL  
GKNVRFIYSWDDYDVFRK VPLNMPNPEMLEKYLRFPITMVPDPWGRDESYARHHEVDVET  
ILPEVGIYPEFIYQANRYRAGTYAEGMRRALEMREHLKTILDKYRDEDHKKIQGEWWPVAV  
FCSNCNRDTTEIDGWDGDWGLTYHCESCGHKETGDLRRTLKGAKLVWRVDWPMRWAYEKVD  
FEPAGKDHHSQGGSFDTSKHVVEDVYGRKPPVTFRYDFIGIKGSPGKMSSSKGKVVDLPD  
LLRVYQPEIVRYL FAGTRPNTEFVISFDL DVIKIYEDYDRTERIYWGTEKAKNEEIEALE  
RRIYELSQVESVPEEMPYQIPFRHL CNMLQIHQGNIDSVIALLPDLKPSQEARVRRRAQC  
AWYWITECAPEDFRFFLRKPGKAELSELEAAVCRLRDEVVAKLDQFAQENEVAEAIYA  
VAQASGIEPKQLFRASYQALIGKDQGPRLAGFLKAIGKEKVL SILEQY\*

>SPBIB\_v1\_20037|ID:27161864| conserved protein of unknown function [Uncultured spirochete bib]  
MMPASMNIEKISLEEAARIALAECIELKKQENVLIANPDTEQSEIAKAFFEQAEEMGAS  
PRLLFQPVKTQADYAEDEVIAIEA APPVILSISTEKL GKDRKRLSSPLKAPDGRSFDHI  
FHYLLHGISAIRAIWTPGITKDMFIRTVPVDY LKMRAAADRLSALLTQASVVMVKSPGGT  
DISFSIQGRKAMRDDGDFRSAGKGGNLPAGEVFISPAIKSAEGTIVFDGSSISDIEGDIVI  
QKPIACTVRGGYVMGIEGGEEADRLEKALMRGLN MASRLVHQQGMAPETALS YGTNARHI  
GEFGIGLNPAARIGGNMLEDEKVLGTIHF AIGSNYDEDAPALIHLDGLV KLPTVVLLMPT  
GEEITIMEHGALSMVAALTE\*

>SPBIB\_v1\_20038|ID:27161865|gcp| O-sialoglycoprotein endopeptidase [Uncultured spirochete bib]  
MRILGIETSCDECAAAVVEDGRHILSNVVM TQIPLHERYQGVVPEIASRAHIEWILGAVR  
RALAEAQLDIDDIDGVAATAK PGLIGSLAVGLSFAKAFAWARGLPFGKINHMLAHL YAPQ  
LEETIEYPFLGLLVSGGHTVICRADD FDSIAVLGTTIDDAAGEAFDKVAKYYGFGYPPGGL  
AIDQLAERGDENAFKFLPSLHKGEHRYDVS YSGLKTA VIHHLHSYL RPGASISPENIAA  
SFRKTAIDTLLSRLYRAVRDTGIRTIVAGGGVA ANAYLRRELASKKDLRVFFPPLSLCGD  
NGAMVAGIAWHYFCRGEADGWDLAPSSRVMDFKWRQNHP\*

>SPBIB\_v1\_20039|ID:27161866| Divergent polysaccharide deacetylase family [Uncultured spirochete bib]  
MNGARRGTIHSVGTQKRHTQKYSLVIAACAFAVFALFALINACTPKDSSKKQAQSSRYG  
TPEYVIELPPGYEDLKVIPESQKEPLTQPPANPESLSGSQPGAPGAGASVARLARPEGTV  
PSGAPVLIIVDDVGYNNGELKPFLELPFITFAVLPLQLPHSADSALSIQKAGKEMILHQ  
PMEALGGNDPGPHAVYLSMDEATIAKTVAENIDSPFYQPKGMNNHMGSAVTRDRNAMTPV  
LKLVKERGMYYLDSLTPGTASELCRELGTPLYMERNVFLDNKSDRESILAAIEEGKRIA  
RKRGAAVMIGHVWSTNLAATLMEIYPELVEQGYSLSTISQYMQLQAEENSGHADSWN\*  
>SPBIB\_v1\_20040|ID:27161867| RNA polymerase sigma factor [Uncultured spirochete bib]  
MTITDNDESLSLYFDSIRKIPLVTRQEESILASRIARGDKNALKKLIEGNLRLVVRIAKS  
MWMPPHSLMDLIQEGNIGLVKAAERYDASKNVKFSTYAVWWIRQAISRSLVNTGRQIRIP  
HRKEDALRRLNAIQMRKSLEISRAPTEKELADELGCSEAEVSNIMHLGDQPIALEQSGDE  
ELSILDIYEDWRYNPEREIERASISWQTAWLLSNLPSREREVLSRRYGFTEGRTESLKA  
GAVVGCSAETVRHIESRALKSLWHTAARVGLTA\*  
>SPBIB\_v1\_20041|ID:27161868| protein of unknown function [Uncultured spirochete bib]  
MNLQIQTDDAILEAEDILHKPLVSVMSGENFVVTTPAAPRYRSNKERPHYVPQNVPTS  
PKARAKNRIDFRTLFRLEKKNHAPRSGKPKQRNNNAGAINRFSVQPAMFPRTIVDVPSEL  
GTGVPGADKHRPFELGLVRRRPVARSTMRTLLQGKMLHAFKIRARWIILALVLAAGT  
GFLAASIINSHPHISLPNENSAQDALIAMLEPEPSAVQNSDTALPPLPSLLVERS  
YTVR  
RGDTLQTIARQFGLREDTIISANSLNSKTQLQVGTKLIPNMNGVYHTVKRNE  
SLSTISR  
AYGIEMVRIVDANNIASSALRAGDRLFIPNAKLDSSVLRNFYGDFTFIWPV  
RGPISPPFGY  
RTNPFSGERTYHAAIDIVVNRGTSVKATREGKVADTGYNAVFGNYVIIRHTD  
GYQSLYAH  
LDAILARKGARVNQGEVIGRSGNTGQSTGPHLHFSIFRNGQAVDPRKYVK\*  
>SPBIB\_v1\_20042|ID:27161869| putative Signal peptidase I [Uncultured spirochete bib]  
MWKRPPASAKSFDSTLITIVLVVIVAILLRFFVADAAIVQGKSMPLPHYRNGEV  
VVFIFKAA  
YGIRLPSGRYIVRWGRPVRGEVVAALRPGTNEIVIKRIGEIREQQPMPVYFLIG  
DNGIES  
IDSRDFGLVTFDAFVGKVIPQR\*  
>SPBIB\_v1\_20043|ID:27161870| Peptidoglycan glycosyltransferase [Uncultured spirochete bib]  
MENHAQARFNRLRLIFVLFTFAAAVLVRYAVLAIIEGPKTEKSTNTVTERGRIL  
DRNG  
NVLAFDIPKFNIAIRKNEIDPFRIHEDLRIVASALNTSADALEQKIRDSSQNFV  
YLAKRL  
DIDTVKPLLSQADKQLAGFLIEISGRIYPEGRLASHLIGFTGEGNRGLEGVEYK  
YDTE  
LSGAGSENVRGSDIYLTIDAHLQYALEQTARKAFNENHAESFLMAMDVNTGEV  
LAYVQM  
PDFDPNNFNGAFKEAEREDRMSVYSYEPGSVFKIFSMASVLDAGLITPKTQFN  
CDGAYRKT  
LPSGEQIIKDLHSYGMLDLAGILAKSSNAGAGYASDRMSEAEFYSRLINFGFT  
QKTGIG  
SPGENPGSLREPAKWSARTKPTVAIGQEIRVTALQMITAASAVANGGILLKPE  
TIQRIEQ  
ADGKILYNHKPVALRKVIAPETSRAIITAMESAASLEGTGWRAKVPDVRMAV  
KTGTAQMI  
DPKTRAYSETDFIASTLILPADNPKVAIYVAIVKPKGDSYLGQIAAPVLR  
EAAESAIS  
ILGLPRGKSQNAMHDGLVTIQEPAPAVIGAKMPDLGGFSKRQLPLLLRS  
DITVIINGDG  
YVVSQDPPPGTAEAGARIVLRLQ\*  
>SPBIB\_v1\_20044|ID:27161871| Metal dependent phosphohydrolase [Uncultured spirochete bib]  
MTRDQAVALWRQWNNDESLWRHALSVESVMRHFAHRYGENEEYWGLVGLLH  
DIDYQKYPE  
EHLRHAREILAPAGFDEAFIRAVESHGWGICSDVEPAHVMEKVL  
FATDELTFIAACAYV  
RPSRSVLDMEVKS  
VKKKWGSAAFAAGVRRSVIEQGAQMLDMPLEELIGETIVALRSVAAD  
IGLKGNL\*  
>SPBIB\_v1\_20045|ID:27161872|ffh| Signal recognition particle protein [Uncultured spirochete bib]  
MLEKISETFSDVVRTISGKASISEKNVEDALDRIKIALLEADVNVRRVRRFING  
ALEEAK  
GEKVLRSVTPGQQFIKIVFDRMVALLGDERQDLALKGTDTSVILLGLQGS  
GKTTTAAK  
LANMLKNKGRKVLLAACDLVRPAAVEQLAVLAGQVGV  
DIHREDSND  
AVQVARNALARARR  
EGHDV  
IIVDTAGRLQIDEPLMQELVRIRDAMSPVESLLVADAMT  
GQAAVDIAKAFDEKIG  
VTGVILTKFDS  
TRGGAALSLSITGKAIKFIGV  
SERIEGLEPFY  
PDRIANRILGMGDIV  
SLVEKAQEVYDQ  
KEALDLERKMSQETFTLEDYLDQIHKMKMG  
SVKSMLEMIPGLAGQID  
EDRIDLQEMK  
WEEAILLSMTKKERQNH  
LIIGPSRRSRIAKGSGTSVAE  
VNRLKKFEKSR  
SMMKKMVKNKGAMAKMFGGGNP\*  
>SPBIB\_v1\_30001|ID:27161873| conserved protein of unknown function [Uncultured spirochete bib]  
VHWF AFCPNPCPYHHEAPASWAYAIGWYATKAFGKVRFRCTRCGKSFSTQTFSTHY

LKRIVSYRDVLYXX

>SPBIB\_v1\_30002|ID:27161874| conserved protein of unknown function [Uncultured spirochete bib]  
MPAIGHDAQYRCVCEKKA AFEGGFFFCRTVDTELQPHALNADKIKNECVQKGIPMNRGKH  
IILALVVIVVLISIFPITVEAVEPVPYRLFPALYKKENFSRIDQTMSLVNYQAGGGFLWD  
RVPLIANNTIVAYYGSPLSDRMGILGRFPKEKIAQMVKETAQQYDEVNGKDGVIPAFYII  
YGTCWPGGEIGYLDEKVLDDYIKYAQSEGMLVFVDHQIGKYSVREAMDRILPFLRYPNVH  
LAIDPEWRTL VPMKEIGSITAKELNDAQDYMDAYIRENNIPGIRMLVVHQFADKMIQSRQ  
EVQAHRDRVILIHTSDGFGVPQVKKATYQRNANAANMPVKGFKLFFKSDFPLAGFDMPLM  
SPAEMQLDPRPSLILYQ\*

>SPBIB\_v1\_30003|ID:27161875| exported protein of unknown function [Uncultured spirochete bib]  
MNRARKANIAILLCAALSTVSA YDPPKGASLLGRIYSSWSMGGGMSLTEQGS AWAF  
NPASTAFEELPGLEFSYTG IADMSTGSPQGWGSAQAADFALPKAYGVWVGAVRLFSTPGA  
MTSMPLGTFVTVGGGFSK KISGRMSVGASAWLAMGDNGSFGWGWADLGVIQELGDVGF  
KNARLGFVVSGLGKEFN YQTPVGIAPGSLAATGFPQAFTPGIGFSADLLNEYDLRMRVS  
VDLRAPSFSDIEAETSLALSFRNIVSLRLAMATSLYDIQQKSGRSVWPSLTLSGRIPLGK  
KSANNAGVSSVAPAFGLMPL YDSLDAFSLGTRLSFGQADKSPKVK AQLPVSTSGLPAA  
ISPADGAQDWLEIPITVSDDQRTVAGGVFKIEDRSSGKVVRTITEQASPPETIKSFADL  
KEGFGFSRHNAFIPDALRWDGKDDQGNLVPEGTYIVSFHAWDDLGN TNMDYDSCMNVVVD  
RTPPSVNAWVLGDEQLYQGT DQLIFSPDGDNSKDTISFRTQGS IENNWKEYILDANDKAV  
RTKEIRERSAPRDFVWDG TDDAGKRVPDGYRFRLSAADPAGNVGSKTIGVAPDKSDWIV  
VDSRPAVRVAADRKA FSPIKEGKAGTIDVSFSLESLKNL VSWKEFIQDQSGKTLWSSG  
DSSNPPLTSFAFNGLDPSGKPFADGQYKAGIEMKYRNGYSPVVYS DPFILDATPPSAQIV  
LDDVRAIFSPDGDGSRDALAFKFAGSKEDLWNLSIRNEQGEVVYSQEYRDGLANRFVWNG  
LDTTGRRVDDGRYFLHLESKDIAENAFSTEYGP IVDTRTPRASFA LSRDAFSPNDGVA  
DVLKVGIMLESIEGLRAWKLDVASSAAQIAEKNA AISTLLSGDGSNPPATWQFDGKTD  
RGQLPEGAYR FELTIEYDNGWKTTVSSPEFVLDNTAPKAQVSR SRPYFNPRGSALQSQVI  
ISQLGSKENLWTGELRDAQ GALKRKWEFKNSEPGEILWDGRTADGALLPDGLYSYRLFCV  
DAAGNSFASEPIHIGIDTAAKQSSLSANYMAISPNGDGIQDAMAL AISVTSPESVQNWRL  
AILKGQETVMEWKGAGNVPQSITWDG TSLTRLPVPDGSYTAFFHADY PNGDATEASLGPL  
VVDRIAPQAEVKIARAIFSPNGDGVNDTLPIQQSSVPGDVWQGSILDVDGKVVRSWTDWG  
TVQSVEWDGRDNAGNVAADGKYRYKLESKDAAGNAFSYISP AFEIETEKKAVRLTVSDKA  
FSPNNDGIKDVQVLSAAIVAPEKVKEFVLQIVAQDGPAA LSAVRTWKGETPLSRYEWRGE  
TDAQIPAPDGHYAASMRVVYRNGDEAESATGTFL LDRQYPQIDVKVQGSIFSPDGDGRSD  
TITIAQSSMPGDDWKG TMKDSAGNVVRSWAWQAQASDFVWDGRNTNGSVVSDGFYTYTVE  
SEDAAGNRTMAGPFRIQVETGKRAVQLRLSDKAFSPNGDGIKDELVINVEADARDRIKQY  
SLIIRGKDGTAVRIWTGSAGLAREYRWNGTNDAGAA VPDGEYSVGIEVLYLNDAFAKDG  
IPVTVDRIPQASVRLSRIFSPNGDGRADTLEIAQSSVY GDRWNGQIISEVGKIVRTWE  
WYPMIADIVWDGKDQNGKIVPDGAYYELR SIDEAGNSFILPRQRIIVDAAQKNVSRVE  
PSAFSPNDNGVKDITYINISAPK PETLLSYAVSIFSGTKAVQGGQAPVRSWKGSTDIKTQY  
VWDGLTDAGLKVPDGNYSVYLMLEYANGDLFNIGPVPV VVDTVPPKISISADPMLFSPNG  
DGIKDYVTITQNSDPGDDWTGRIRSASGAVVRSYTWKGQAKTFNWDGTDANGRLVPNGAY  
SYEVVSVDAAGNSASASIKGLTVDSTKPKVYVTASDTGISPNGDGIRDDVSFSLTVENRE  
GVESWRFLIDSKGVERSFFGGSGSDVPTRLVWDGRDLQ GQVIEDTYTGKLVVRYLKGDV  
AEASSAKIIVKIAPPKVDVTVKPEYFSPDGDGVDDTLTFGIATEKNAGITEWKLEILETA  
VVESASMQEAKPTRSFKIWTGKGNPPAQITWNGKSDKGELVESATDYPFEFTCWDALGNQ  
TKVKGIIAVDVLVIRGDRLKIKVPSIVFRANHADFIGLDAETVARNQRVVARIAQILNK  
FPDYRIRIEGHGNNV GKMLGYSASRIQQEEINELIPLSTERAEVVRKMLVDNGVDSRRLT  
VNGLGSSEPVPFTDVENRWKNRRVEFVLIKNQ\*

>SPBIB\_v1\_30004|ID:27161876| membrane protein of unknown function [Uncultured spirochete bib]  
MHTIHDPAGVFVALLAALLFSAWLSDLLPMHIAAILPVLG IILGPEVLGIIEGGTVLQIL  
GSIGVMYIFFSAGLSANIASRTARRSIVPTS VILKQVFIWTIMPSMAGIAVGLAAGASFI  
RACAIGLFFASAGARSALKLNKAKFQE QASYGMPAFVPIFSALCLLVLDTLMSGADARSF  
MLVLAFSFIGGGLVWIVFPRLAALFLRHVKIKGSIEVWLLFLVFGAAYAGTFFSIPAWF  
TAFMTGVALSAAAAPSADSELN RIPVRDDIFIPAALLFMGVSARISGILPTGNWILVAVI



FVIGGLAARILIVFLSKRFALVTEPLIGLAVPFASFSLAISWILYGSGLFDSVLFLSALA  
LAISSIIISGISMKGSSGAEAPSAAGGDKSRLAIPNRILIALSKPSSIAQLVELSGILH  
GTANSSPIFPLVVRMPEETASQQSADSETLLATAVMQLSQMQKSALPLQIEALNAGLGII  
DSAIQKNADTIIIGWKNPPRLSHAFFGNVIDQVVSGTSQMVLVARAQFPWKQIKKIYVVA  
PVLVNRHPGFAAALQCIERLAEATYAHIHFIVAEENAEVQKIGKSLASFNSAQTSHFHS  
WRDIPSLIQVSSGSHAMIALISARPGEASWNPAPERLPHVLAEKNSAANVLMMLYMPAFLP  
EEAQASEYQQPLPEPLAESSAEALLAEA VRAGRIRVDMQTSADGIYELMFAALPHTEK  
NVLQSVADHFIEMVQRQPIEIEPGVLLHDRIENISYPIVCFGAHKKGFRLSTLDVPVQV  
IVIIIVPHNQGAEEHLRFLAEIAALFHSIDLRLERLIAANMPENLLSQH\*

>SPBIB\_v1\_30005|ID:27161877|murB| UDP-N-acetylenolpyruvoylglucosamine reductase [Uncultured spirochete bib]  
METLWQIAQKINTEQCSVTFDEPMSAHTTFRIGGPADLFLKPRSVEALASVLTLLRSARI  
PVFLLGGGANILVADQGIRGAVIDTCLLSSVRSASNSNIYAECGASVSTLCTEALVQG  
LSGLENFYGMPGSIGGAIYMNARCYEDDISLHINEITAISPTGELVSLSARTMQWSYKRS  
PFMRKGAFAGYIVAAGRFSLEPGEPLQIAAHMRSRMRMMDRMHKHHFDYPSAGSMFKNNRNF  
GKPTGKILHELGLRGYRIGNAAISPWHANIFINLGGATARDMRALILHAQAVVLAATGWK  
LEPEVLFVGEF\*

>SPBIB\_v1\_30006|ID:27161878|cysS| Cysteine--tRNA ligase [Uncultured spirochete bib]  
MHDMYLFNTMGRSLQRFEPLHDHKVGFYGCPTVYNFAHIGNLRTYIFEDILVRTLRRF  
YDVTHVMNITDVGHLTGDDDTGEDKMVRSARERGSVLEIAQFYTDAFFVDTQRLNINRP  
TIVCKATDHIQDMIDLQRIEANGYTYFAGGNLYFDVSKFEHYGELAGLQLDQLKAGARI  
EIDPNKRNPFDVFLWFTKSKFENQALLWDSPWGRGYPGWHEICSAMSMKYLGEQFDIHAG  
GVDHIAVHHTNEIAQSEAATGHKWVNYWMHAEFLVLDKKGKMSKSSGSFLTQTLVDKGYD  
PLDYRYFCLGGHYRSQLSFSWEGLDQARAARLALVDRVVALKEAAGQPAHSLARPEQIGA  
AAKAYLQAFDDALSDDLAMPRALAQVWTMLKDTEIPPADALACILDMDRVLGLSLDAAEK  
REASVDAETVRWIEDMIRRAAAKARDYAAADAIRNELKAKGIQLEDRPDGTSWKLTN\*

>SPBIB\_v1\_30007|ID:27161879| RNA polymerase sigma-24 factor [Uncultured spirochete bib]  
LFQRKDDSLSSDFRIFAQNIIDLLRIA VRITNDWESAEDVVQDAFGKVLEKRLQFPSDE  
DARYWLIRVVKNGAINWSKRKLREFKAYEHWWKAETTQAKSSSSAASNGEEQNQDAGTEQ  
SAHELLMKESAEEVREALAKLPENLRVVLILKEYEGMNYKEIAKVLGISEGNVKVRAFR  
ARQALLSLLSEGGTHVP\*

>SPBIB\_v1\_30008|ID:27161880| conserved protein of unknown function [Uncultured spirochete bib]  
MCPDEILLTAFVDNEVPSPWKERIELHLEQCERCRTVETYRELRVRLRSADSIDALQLA  
HAVQRIRLSLEETEKAAASMKGARRLVARYPILSALSSRRVSVPLPLLVASALLIVFFAGL  
AFGIFGAGRYANQALALSTRLPATTNANIESLVSTLSQTDPSQVVTIRAPGTMLAPLSSA  
APVYVIYNIGEQQKPTVMAVPAQGEAK\*

>SPBIB\_v1\_30009|ID:27161881| exported protein of unknown function [Uncultured spirochete bib]  
MRIRTLVVI AFLLAGAGCLFAQAPSAQPAQGTGIAPSQNPGASLPLPVFQFRLRAAFML  
TPVMVA AIQSA AIHSQNSKVNNAQPLDKDAVPAWDEPILRDVSLTSPGIIKIQQDQLIAM  
IVFMPVELVKKDLTMLVQNQIWAKSPDNSIQMNTSVHTIRVPLGALFYYPPLGGDNKQGA  
PVAIEILVNQK\*

>SPBIB\_v1\_30010|ID:27161882| exported protein of unknown function [Uncultured spirochete bib]  
MKRRAIIIIVCMFVLMMLAAGAIIFYVSRPVLIAIDPVSSKPNEVVSFLFRNFGEQPGHVL  
FDAAPLPSPAVLYWSPQLSIRMPHGVDTAIVRIQTRFGLSNPLMLADASKIPEISKSAP  
IPSIHPVISSMQPTTNAQIGKPLIVSGDHFDPGEEGSAVFFTRIASVSTLALDDPANFIE  
VNSVDKLVVWWTENKITVRVPDGAENGFVIRTKRGTSNVYPVVSISRAGRTWKGETAKY  
SIEQRIAIHVAASLPEGQLSLFLAKPPNQANQNAQIEVKSGAEYLVA DENNWQEFRLGQA  
DASKGKIEIVRGLQVDVSEM RADLASSSLQGIDSPWPAFLASSLAADTLVPSDDPTIQAA  
ALAIQKKEKNPFRQIVLVSQWVSSNVKLN DKSQGLSDEALVALKHKAGGTRALALLNCAM  
LRALGIPAVPVAGFLATGDNRLIPHFWGEYYLTGMGWIPFDPLLASGYVPQQFSGGFSR  
LIYYRGIDNRHIAMSRGYRLLPAVSREVQKKKQKVSWSFFEYDELSLGLSYSSTWDIAMIS  
WNANP\*

>SPBIB\_v1\_30011|ID:27161883|glyA| serine hydroxymethyltransferase [Uncultured spirochete bib]  
MSYIQSVDPHELHAAMLAEMDRQKNKLELIASENYTSRAVLEAAGSVLTNKYAEGYPGKRY  
YGGCEFVDIAENLARDRAKKLFGADHANVQPHSGSQANMGVLF AALNPGDTIMGMSLAHG

GHLTHGAPVSFSGKLYKVVSYGVNPDPTETIDYDQVAYLAREHKPKLIAGASAYSRIIDF  
DAFRRVADEVGAYLMVDMAHIAGIVAVGRHPSPIPVADFTTTTTTHKTLRGPRGGMILVGR  
DKENNRGIMTPKGDALRKWSEVIDSMIMPGIQGGPLMHIIAGKAVALKEALEPSFAEYID  
RVLLNAKAMAKALSAGGARIVSGGTDNHLMLVDLTPLEITGRDAEKWLDEANITVNKNGI  
PFDKKS PFVTS GIRVGT PAITTRGMGPAEMERIAGFIMDVLKSKGDAQVITRVKQEV LAL  
TKRFPLP\*

>SPBIB\_v1\_30012|ID:27161884| protein of unknown function [Uncultured spirochete bib]  
MVLEGGVGRWYAEALLRSAASQHFFSFALRKEEWVRVFRVQGVAE EEGGAHVDEGAPES  
GAQKSQNAPDSGSASQNSENLWARYQLDSAGAMLVVALRYAPDVEPESDEERAVRGLPPL  
PIAKEGRPAAAVGRFARANWYRETIARLADCVK SISDEARARGLPVFAPREWHRFSNSRF  
PEKALAVAAGLGTIGRNGLLIAQRTGNAEASDSGCAETSSWPLWSSAVVLGLMLLPFDIG  
KEAGTLHDEPIMPLALCGTCQRCIDACPTGALALAE LPRYERARCIQNYTSGAGPLPEDI  
EAAWGNQLYGC DICLEACPYFKP NSEACTALGRIGGAFDAAFIAAMSEAE LRAVFKGSAL  
DQKWIAPEALRRNVAIVASLFIGKSSDVPSRLL\*

>SPBIB\_v1\_30013|ID:27161885| conserved protein of unknown function [Uncultured spirochete bib]  
MYTLIYTASYEEKVRRFLK KHPEIEKQYIKTLKLELNPFHPSLRLHHFKTSNFE GYSIS  
INLMYRISLEFIMNGKEILLIDIGDHKAIYGKE\*

>SPBIB\_v1\_30014|ID:27161886| Prevent-host-death family protein [Uncultured spirochete bib]  
MAILVSANDLKVKGIRAI EENSNDREVIITVRGKEKYVILPIETYNQLREYELDAAILE  
AQKDYAEGRYHTGTIEEHLQRVH\*

>SPBIB\_v1\_30015|ID:27161887| protein of unknown function [Uncultured spirochete bib]  
MAESWKC ANVQIQILYLQ QKHFSIFVSEIDTKGLFCTCIRYIVLRVIRKEHSTKAKTVGE  
KLFFADPAFY PALGGDLGTSREAI VAFFLEQAGWNVEALADEQAGDFAISRTGPDTRTER  
YTLEVGGRSKKPKQAD FVIRDDIDYPAGNAIPLWLAGFMF\*

>SPBIB\_v1\_30016|ID:27161888| Lysine--tRNA ligase [Uncultured spirochete bib]  
MEVSILQARSRMVTATRDFFLSRGYLETDTPALAPSLIPESC LEVFATEYVHPTKGRRPL  
YLIPSPEIWMKKVIAETGRSVFQLCKSWRNAESVSR IHNPEFTMLEYYGVGLSSSDNIRL  
TEELFAALATDETPPQARPPFRVMSMKEAWHEFAHTDL DALAEPEAMREACRERGLLVPQ  
DAPWEDAFNILFLSFVEPALPQDQPLVLNEY PAGIECLAMDIPGTTYKERWELYVSGIEI  
ANCFTEMASSDAVRAYFASQSEKKRQALVPHHIDDSYASIFEHFPPCSGVA VGFDRLLMV  
LLGKRSLAEVMLFPFESFPETE QASLETLRNAAMHDSW\*

>SPBIB\_v1\_30017|ID:27161889|efp| Elongation factor P [Uncultured spirochete bib]  
MVRGGEIGIGTCLLINGTPHIVVEREFVSPGKGS AFARVRAK NLKNGNVITQTIKTADFV  
EDAQVDLVDCQYQYNDGEFFHFMNNETFDQFEVPVAAHEDRGPYLKEGETYTIVMWE GEP  
IDIKIPYKMVFTVVESENYVRGDTVSGATKPVTTETGLVVRVPLFIKQGEKILVNTESNE  
YVERVNE\*

>SPBIB\_v1\_30018|ID:27161890| conserved protein of unknown function [Uncultured spirochete bib]  
VLDAGCGTGVIGISLAASCPDMEVVMRDRDFRAVAF AARNASRNLAVKLQGLGGTELAQ  
CAKRPFKIKVQRNAALIAAPGLLCEPDPNAPYEAVVANLP AKAGPALLSQYFVAVGRE  
LLREGGTFAFVIVAPLAEQARAWCMEAGFEIQR TVATKNH MVCIARTGERRAGENA VKEA  
LAELGRGKADQWFKAYVRSHVKKSIAGASLVWDGIQGLPEFDEPSFATLCALALGRQVFP  
GSLVRRALVIEPGVGIVPLWCKGVLSSEITL KSHDVLALAA SGWNLRRAGFDNSVRILE  
PAFAKKENSAGEPVLDSAERGMEVLAPFSIDAA ILFPEDIPKFDSASYWPLLSRALKRG  
AVAVIASSATYIGRFVRQKPSGFSKLPQGEHRKGWEAVAFRRE\*

>SPBIB\_v1\_30019|ID:27161891| conserved protein of unknown function [Uncultured spirochete bib]  
MKKSEKLIIESATPDEYVTNSLKSRLKPAEKARLARMWMERTGYTRDDIIRARNRNAYWR  
KRKMEGAAERTKRRMQEHDYSEGTAIEWTRERIEEFITLNRKDAYGRYIHRDWELAQHFG  
TSIPSIQYMRRKY NKIRKMLGPGAKRDKVIDYMSCSELVLQHGGPKSRKRSR\*

>SPBIB\_v1\_30020|ID:27161892|recG| ATP-dependent DNA helicase RecG [Uncultured spirochete bib]  
VFLRELTQDVRILKGAGPATMRALANLGIHTVADLLLHLPRDYEDKTKIVPLSRFADAKV  
FTTARVIRHEWFGFGRMRTLKILIEDESSEAA LLCFNRPFLEQMAPVGS MIQVYVGKFKQFK  
YGEIQSSSFEIKRIDGELAAEKALSPVYPLTEHLNQ MAMRKMVTLALNKFASHIEDELPA  
YLLDRRQFLRKTDAIRAIHFSSWEDAKRAHDALAYEELFYFQLGIALRIRARRAKTIER  
KQSPGVLARRLRERLSYSLTDDQQA V LQEI VDDMHKPYPMARLLQGDVGC GKTIVALLAA

LYAVERGGQVAIMAPTELLARQHATIAAHLVEPLGVRLAFVTGSSVNAARPPLLSALKNG  
DIDIAIGTHALFSEDVAFKNLELVIIDEQQRFGVLQRIALYKKGHVPDLLMMTATPIPRS  
LALTFFGDLQVSTIKNLPPGRRPVVTHLAREDRCDRVYEFARKKLKEGRQAYFVYYPVISE  
SDRLGLRDAESMAAHLAKEVFPEFKVGLLHSRLGDDAKMEAMNQFAAGHIQVLVATTVVE  
VGVDVPNATIMVIEHAERFGLSALHQLRGRIGRGTYYQGYCFLIYSKELTEEGRMRLKALY  
DTNDGFAIAEEDLKIRGPGDLLGIEQAGELNLRADMRDFTDLLKEARKDAFAVIEKDWL  
LAGPEHEAIRQVLTRANPLRER\*

>SPBIB\_v1\_30021|ID:27161893| Thermostable carboxypeptidase 1 [Uncultured spirochete bib]  
MHKETARLLELDREHSLVMHIGAILGWDQETYMPKAIERSSQLALLEGLAHQKAVNPE  
IGELLAALEAKSDLSEDEKAYVRVVRDYDRETKLPEAFVTEYAKEASLSQAAWADAKKN  
NDFAAFKPHLSRMVELNKKRAHYLNPNAKPYDVLLDLFEPGSTQESVAAVFAKMKSYLVE  
ILTRIRERPQIEDKCSGRRVDKHTQERISQYFMKVLGYERDRGRLDVSAHPFTTTLGADD  
VRITTRYVEDYFSSSLFSTIHESGHALYEMGIDPNPDYRGTKLAEAVSMAVHESQSRLWE  
NIVGRSPAFWERHFPALSALLGEVGEGLDLESFVKSINRVSPSLIRTEADEVTYGLHVIA  
RFELESALFDGSLNVEEVPEAWRAKYRELLGIEAPDDRQGLQDVHWSMGAFGYFPSYAL  
GNLYGAQFWAALKKEIPDVEARISGGDTSAVLAWLRKNVHVQGSRYTPGELVKKVTGQAL  
DPVWFEKYLREKYSKIYGF\*

>SPBIB\_v1\_30022|ID:27161894|hisD| Histidinol dehydrogenase [Uncultured spirochete bib]  
MEKYTLKRITIEEPEPSMRLFDPEVDAVAIKAIEAVRSGGEVALRRWAQEFDGLAKGAP  
LVIAREEMKAAAYDSLPEETAALLGRAKGRVAAFAAAQRACLAPLDVPALGGRHGHEFVPV  
ARAGCYVPGGAFPLPSSALMTVIPAKAAGVPEVWCAGPKPTRETLAAAWLAGADGFLQCC  
GAHAIAALAFGIAVPRCDVIIIGPGGKYVAAAKRLLYGIVGTEAPAGPSELLVIADESADP  
DIVAADLLAQAEHSPDAMPALIAHSHIADQIDRILRAQLAALPEPNRSIAQRSLQNGFC  
CIEPDPARIADGANHCAPEHLEIATSEPRALAKRIKNAGAIFLGSGSAEVFGDYGAGPNH  
TLPTGGASRFAAGLSVLHFLRARTWLAIDDPAGLADDTAAFARLEGLEAHARAALIRTRR  
SSSTSLAGTSRTRPGPAPAR\*

>SPBIB\_v1\_30023|ID:27161895| conserved protein of unknown function [Uncultured spirochete bib]  
MIVPSIDIMNGRAVQLRGGKQPPLDAGNPLELAERYSRVGEFAVVDLDAAMGKGSNRELV  
LSMCKRWPVRVGGGIRTQKLALAYLNAGARYIMLGTAATPEFCAQLPRERLIAALDSRND  
TIMVEGWTKPREGSVEEAIQKLAPYVAGFLVTFIETEGDQCIGIDIERAKRLVKLAPDRKF  
TFAGGAAGGERGLADITALDAIGADIQAGTSLVLGDLSLADAFAPLHTDRPDGLWPTLV  
CDESGKVLGLVYSNRESLKHAIESGKGAYHSRSLGLWVKGESSGNGQTLIRADLDCDRDT  
IRFTVRQEGVGFCHLKRNCFDGYLEKLNRTISKRMKDAPQGSYTRRLFSDEALLASK  
LREEAQELAQSKTKDEAVAEAADVMYFALVKTISMGGSLSDIEAELERRSLRVTRRGNA  
KPEFEGSEGKNEWKSIH\*

>SPBIB\_v1\_30024|ID:27161896|hisF| imidazole glycerol phosphate synthase, catalytic subunit with HisH [Uncultured spirochete bib]  
MSGLAVRIIPCLDFKDGRVVKGVRFENLVDSGDPLERALLYEAQGADELAFDISATVEG  
RKTMAKEVARIRKAIAIPITVGGGIASMEDAARLLD SGADRVSVNSAAVREPAIIEAIAR  
RFGVQCAVVAIDATKSPAMPSGYEVKIAAGAVATGLDAIEWASEAAQRGAGEILLTSIDR  
DGTNLGYECNLIHLVSRAVPIPVVASGGASKPEHFLEGYRNGALALLAAGIFHRSEVSIS  
EIKQYLSAHNVEVRL\*

>SPBIB\_v1\_30025|ID:27161897|hisH| Imidazole glycerol phosphate synthase subunit HisH [Uncultured spirochete bib]  
MSQIRTPSLVIIETGVANLASVRALAERLGLQPIVTS DPEEVVRAPFVLLPGVGAFGPAM  
HKLREGLDAAIRSVAEGRPIAGICLGMQLFFEASEESEGVQGLRLLPGKVKRLSGGLP  
LPQLGWNRIEPEPGSRLLAGWVYFANSYGVGIEQKFN DGTADTSKAAFPRFDSISIATT  
TYGSAFISAIEAWRDDRPVLLLCQFHPELSGSFGKNL FARWLELASERRRV\*

>SPBIB\_v1\_30026|ID:27161898|hisB| Imidazole glycerol-phosphate dehydratase [Uncultured spirochete bib]  
MSEQSIQNEKGGQSQIARLRRTTRETDVTIALSFLPGAIDIKTGIGFFDHMLTQLAFHAG  
WSLELSCKGDLVDVDDHHSVEDCAIALGKAFKLA PSGAGRQRFYAYAPMDEALARAVID  
ISGRSYCVLSGTFTSPSIGNALSTSNIAHFFQSFAANANL TLHLDILRGENDHHKAEALFK  
AAALALKSALEPRAQAPSASTKGETTFSTPEEGK\*

>SPBIB\_v1\_30027|ID:27161899| putative Histidinol-phosphate aminotransferase [Uncultured spirochete bib]  
MLRLDANEGRCLLSEEDLKEILSPEIARRYPVRSLL EEP LAEMLGLPVSCVLATAGADDA

IDRTVRSLAGPGGLVMSTSPGFVEFLEAAKRSSAMFESIPKDPLGAFPVAEICEAVKSRS  
PQLLILASPDNPSGCVLAKSELEAVANACREAGTILIFDATYSDFSLRTAKPVDAIAFPN  
VLVSGSFSKSRGLAGFRIGYIAGGEEAAPLIARLADAGPPFSLSSAAIEAGRRALSDSS  
TVQAFVDEVREVALLTAQLRGLGFVSDSEANFVLLKSSASARVAEMLRREGILVRTWK  
GKTAYEGLVRITVPGEKSEFEKLANAIHTLARFKEAAE\*

>SPBIB\_v1\_30028|ID:27161900|hisG| ATP phosphoribosyltransferase [Uncultured spirochete bib]  
MREKKNERTELRIGLPKGRMQAKVIELFNDAGIPVSVDEREYRPRVGNKPKQALISKGIA  
YEAKLLKPQNIVEMLATGSRDIGFAGADWIRELGVDLVELLDTALDPVTIVAAPEAVAE  
AYGKCKGNIEVVKKVCGRTPIVASEYEGLAKEWIAKNLPGAFAFVRSYGATEVFPEDADI  
IIDNCATGTTLRANKLSIIDTLMSSSTRFYASKEAMQDPVKREAADSLILLFRSVLEARR  
RVMLEVNISAELLDQLVAILPCLRAPTVSPLGKGDAFAVKVAAPRDTLASLIPEIKRRGG  
TDIVVTQMSQLVP\*

>SPBIB\_v1\_30029|ID:27161901| protein of unknown function [Uncultured spirochete bib]  
MTDTRHPGFLTPERHQGEDAASIIYPVVSRRARGLSLGINLFPDSKHCTYNPCYCEVQP  
FSNPHARLSEGMIEAALREFFDKDWPAYAKSFALEDISISGNGEPTCSPFLEEALYAAAK  
VLSEQVSLDAKLFHVPIVLITNSTGFLSPQICELLHRFSQEARFEIWAKLDGGSSELHSI  
LSRSNYAFDRIVGDIAHFAAITPVKIQTMICRDACSGRVLFDAERYCGALMSLIGQGARI  
NAIQLYTTARPPAEPWIASIDDIEMAMLASIVRRCLPSEIRLECFGRSGELSIPNSGQEQ  
WPK\*

>SPBIB\_v1\_30030|ID:27161902| PHP domain protein [Uncultured spirochete bib]  
MAQVDLHHTSSASDGELSPSELMALAHKGLSTIALTDHDTVAGLAEAAQAAHAHGIECI  
PGIEIEIDFEPGEFHLLGYGIDPQSAPLLDATQRLGNARHERNEAILELFANAGFQLDTI  
KISELSRESYIGRPHLADLLVKARCVTRQEAFFDRYLKGRPFYIKKSCLPLEEALSVIK  
AAGGVVVAHPYSLFVSKSMLGTLFSRWKDMGIEGLEAYHPTAKFGQCVILERMARERGM  
FVTAGSDFHGKARPECGLGRTAGNMAIDSCYRDALVSALSHPAQK\*

>SPBIB\_v1\_30031|ID:27161903| conserved membrane protein of unknown function [Uncultured spirochete bib]  
MVVLIYPEITKTIISTMKTLPNRKIAFLFFLLFLLVARLFYFPFLTVILWSGLLYVFL  
EPLHKKLSGSVRVNGRKSFGSHLSALVLSVLGVLLVPMFLAVAVTRQLADLLKSAVH  
FFETNMDKLRIDPQSQLGATIQSFLGDSFDIRTLDPIRELQSLAAGANQALRLSSSLIK  
NVFRFVIAILFIMFTLYYLLMDGNSLGETFVSMMPIDPEHTRLFMRKLRETGRQLVKGYP  
LVALFQGLMMFILSLIFGFRNNLVLAVLTAIASFVPMVGTSLVWFPMGIFIAASGNIGLA  
LVFLITAGILVSTLDNFIRPVVLGGQLKVHPLFLFFSIAGGLVVFNGIILGPLVLMLF  
IAAGDLYRSISVEEDEGAKKSTELTSAPPDEKAR\*

>SPBIB\_v1\_30032|ID:27161904|rsmI| Ribosomal RNA small subunit methyltransferase I [Uncultured spirochete bib]  
MQYKTVSTLYMVATPIGNLGDITLRGLETLKAVDVVACEDTRHTLKLSSHFDIHKPLVSC  
HANDEQRGAERVAALLDEGKNVAYCSDAGTPGLSDPGAVLVREARSRGHVIVPIGPSPA  
ATLISAAGISGRTFLFDGFLSPKPGKRRARLKELLARGESFVLYESPFRVGLKLLDDIASI  
EPERCICIGRELTKIHEEIVRGTASELAPRFPADSAKGEFCLIVEGRGSEQPDSKRGKDS  
\*

>SPBIB\_v1\_30033|ID:27161905| tRNA/rRNA methyltransferase (SpoU) [Uncultured spirochete bib]  
MMDLAHLLNLHGRARVRKTVLILERIEHESTESIHAFFLLYLRELAVMLKESPEPDSL  
QAAGSFLQAIDREQLSSEGRDNDSTRSMLRALNQFRHALMRISGQTPADWDFVNAPRSS  
GFAQRKAGMRVYLEDVRSFPNIGSIFRTAEALGFEEIILSPECADPMHPRARRSAMGTIE  
RMAWRRAPVSSLAEMEGVFALEVGGSSALGEYTFPLPGVMVLGSEELGISSDALQYCTAGR  
VEIPLVGAKASLVATAFGIAAFAWFS\*

>SPBIB\_v1\_40001|ID:27161906|ycjV| putative sugar transporter subunit: ATP-binding component of ABC superfamily  
transporter [Uncultured spirochete bib]  
MAKVELKGMGKVYEGNVRAVTNANITINDKEFVVVFGPSGCGKTTTLRMIAGLEDITEGE  
LYIDGKLVNDVPPKDRDIAMVFQNYALYPHMTVYENMAFGLKIRKLPKDEIDARVKEAAR  
ILDIEKLLDRKPKQLSGGQRQVAVGRAIVRKPKVFLFDEPLSNLDAKLRVQMRAELIEL  
HDRLQATMIYVTHDQVEAMTMGDKIVVMKDGLVQQIGSPLYLYNNPINKFVAGFIGSPPM  
NFMTVNVVEEGGQIFIDEGSFRAPDEKQAGLLKPYVGKSVYFGIRPEDLPVADAAHRGQ  
KFDAKVTVVEPLGAEIHLQATTPTQVMVARIPPHLYKHGDTITFAPVMAKAIYFDKETE  
KSILPVKWNEQEE\*

>SPBIB\_v1\_40002|ID:27161907| Major facilitator superfamily MFS\_1 [Uncultured spirochete bib]  
MDRKKKGFPGPYLGITFLIGFGFFTMGLMDPLYDTYVPIFLSKYIGSMSLVGFIMTIDNILA  
IFLIPIVSAWSDRTNTRIGRRMPYILVLLPLTAIFFGAIPYAAGASLAALIAILLNVT  
KQSVRGPVVALMPDTIPADYRSEANGVINTMGGIASIVGTIGLARLMDLDTKPLLLGNTK  
DRLPFPLAGLFVVLAIILLFAFIREKKPDQTETSEQKIPMIESFRNVAAQKDKSALYILI  
SLFLWFLGYQGVLPFIGKYSVDVLKTSSGTAALAAGMVGIAAIFALPSGYVAHRVGRKK  
TIRASLLVISILTALFAHPWLTAAMPGLSLKASFWAIMFLFGIFWVSIITNSFPMLWQM  
AEWGTIGIYTGLYYTASQAAAILAPILTGLIIDVFGYSGIFLFCCTVCMLAARFVMGKVTK  
GPAESPAAEA\*

>SPBIB\_v1\_40003|ID:27161908| conserved protein of unknown function [Uncultured spirochete bib]  
MISQKIPHIRRADLSVTAQKNLDARLRLVSRLPGSIPGKMTGSQAELHYFSSPGRTELG  
GNHTDHNHGCVLAASVDLMDLAVARARADRIVTVTSEGYDPIIVDFSDSAARMHEQGTPA  
AIIRGLAAWLERSTPLRRGFDIAIDSEVPAGSGLSSSAFELLIAAIFDDDFGGLGLSPV  
EWAIAGQFAENEYFGKPCGLMDQIACAVGGIVSIDFAEPAQPLISSIAYDFASRNALALAI  
VDTGSNHEDLTREYAAIPNEMKEVAAIFGKQTMREVEKADLVARAAKIRAQCGDRAFLRA  
WHFVHETARPALMQDALERNDLASYLSLVRESGRSSWMYLQNIHAGDPRQQSLAVALALS  
EDLLGSEGAWRVHGGGFAGTIQVYVPEPEFFAFSGRMEAVFGRGCVRRLNIRPFGMCRII  
ED\*

>SPBIB\_v1\_40004|ID:27161909| conserved protein of unknown function [Uncultured spirochete bib]  
MSKEYLANIHKTPNTEKAAAYISPHAVIRGAVTLGQDVSVWHGAVLRGDMAPIEVGARSNI  
QDGAVLHVAENMPCIVGEEVTIGHGAIHACTVGNRCLVGMGAIVLNGTVVGDECIIGAG  
TVIPGGKNIPPRSMVLGNPGKVTRAITDEEAIHLREQAYTYIALARETAIEERKGS\*

>SPBIB\_v1\_40005|ID:27161910| protein of unknown function [Uncultured spirochete bib]  
MMRXXSLYLLGHNYLKPFRIRAXKXGHPRXHAEAAGIPXXLVQHFVQALXGXIXAFLSRCX  
LSETMXRTWEKRWKTGPKTKAEYIPKYALA\*

>SPBIB\_v1\_40006|ID:27161911| exported protein of unknown function [Uncultured spirochete bib]  
VLHKXXRNPRCLSMXTRMXSFXCANTKGLEVVVAKEVQAXAHHAVCDIAVETDCFPVVVR  
EVFAQLPVDVVGRKKGIAEX

>SPBIB\_v1\_50001|ID:27161912| conserved exported protein of unknown function [Uncultured spirochete bib]  
MKKILLAVALIAVSGIAFAQVDLSKVKDG VYFAQDNGFSSSGWKEQVILEVSKGKIVRA  
VWNGVSNLPGATDKKTYAASGKYGMKASKIKA EWDTQAKTVEDYL VKTQDINFSKFDK  
GHTDAISGATLTVKGFELAQEALKSSPVEKGSYKDGWYYAEDLNFDKSGWKN SVLVTVV  
NGTIVDVVWNGISKDPQAKSKYVQSQLGTYKMNAKNGEWYVQADRVAQAIVKAGDPAKIP  
VKADGKTDAVSGVSITVQGITLAEALKA\*

>SPBIB\_v1\_50002|ID:27161913| Aminotransferase class I and II [Uncultured spirochete bib]  
MNQLADELNALLSGTVADRLLSDMGRRMYFPKGILSQGAEASERAYRFNATIGMAYEHGQ  
PMMLNALRKELPGLTPTEAVAYASTGGVQKLRSVWKDSL YKKNPSLAGKRISLPVVVPGL  
TAAVSYICDLFVEPGDTVIVPDLHWPNYRLIVEERKTAAGITYPLFSGEGYNVEALLDGV  
RQAGQRRGKAIILNFPNPTGYSLTLEEADRLAQGLLEIAQSGTDILAITDDAYFGLQY  
EPNLLRESMFARLTDLHPNILAVKADGPTKEDYVWGFRI GFVTFGGCGLSDEQYDALFKK  
LAGIIRSSVSSSSLSQNL LKALQDSGYDAQKEVYRATLERRYRAMKNKLSTMQLPEGL  
VPMPFNSGYFMSFHCQGFSAEALRKLLDEYGIGTVSLLDRYLRVAFSSVEETDVDELCE  
AIAKAAASLISKG\*

>SPBIB\_v1\_50003|ID:27161914| exported protein of unknown function [Uncultured spirochete bib]  
MKCKAIPRFALAAGAALFLWLSCQSACAQSAHAESIPQAPPQAALRVATWNVHDCSASNK  
KTGQTFLLHAQIARTLHELKIDIILQEIQVEGRKGADIQLLQNALEHEGWPM SYAAWAK  
SPQADDLAILSRFPIAQNVVLEPSKAPWPRPVLEAHINVAGRELVLYNAHFKAFFDDAKS  
LAARRAQASALASLLRAQYGDRIKGAAILAGDFNTIMPEDMAPNTGTLDMLQLRDNEP  
SDDFLSASLKWRYPEPTFISARYSSITDHLIISPALAAHAGKNDIAIVDAPDSGYGFPLS  
DHKILISLLISDLPLLSR\*

>SPBIB\_v1\_50004|ID:27161915| Orn/DAP/Arg decarboxylase 2 [Uncultured spirochete bib]  
VKTAYSFPLENFMSREKFERIKEFAKDKETPCLIIDLDVIRKKNYENLQTYLPWATIYYAV  
KANPDDAVVSLLRDLGSNFDVASRYELDQLRLGVSPDRMSFGNTIKKEKDIA YFYEKGV  
RLFVTDSIADIDKLSRAAPGSKVFFRLLEGLGADWPLSKKFGSHPDLARQLMKTAMRFG

LEPYGISFHPGSQQRDVGVQSSALAIVAQLFNWARHDLKVDLKMINGGGFPANYLEPTD  
SLEQYAQDIKRFLDNSFGLVWPEKIVIEPGRSMAGDAGVIVSEIINIAKKS VHERYPWVF  
LDIGKFGGLIETLDESIKYPIYFEGQGSVEEVILAGPTCDSMDILYERTPYFMPSSAKIG  
DRVYILTGTGAYTQSYSSVYFNGFPPLKSYILPPA\*

>SPBIB\_v1\_50005|ID:27161916| conserved membrane protein of unknown function [Uncultured spirochete bib]  
MIGFFIKKSFDDGWDNL YLLAALNGIFLLVLLFFAVPVALGAPMWLIIIAVACAIAVLS  
IWDVAVSNAMEYAIADGKSVHFADIKAAIPRS AKLGLVMGGINIYGVALTVALPFYLSQK  
AMWGVFAGGVLFWTMILAMLILQYVPAIFARDGGTLRQIFRTSLYLFVDNPGFSIFLLW  
RIVTLAISALTMLLAPGPAGSALASAVAVRLRMKKYRYIKDNPGADRRRIPWNELLLEEK  
ELVGKRTLKGMIFPWKD\*

>SPBIB\_v1\_50006|ID:27161917| conserved protein of unknown function [Uncultured spirochete bib]  
MIEKSRREPGMKPPARGKGHAAALNPQKKVRS AEHGENSSTRPLLEAFEERKKLALSSIVF  
IRFDGKAAQSHIPEGIDPSIPYVQLQAPMVKLN PASITPESLLTGMLRVLA WDPDNANG  
ATYRAYVRAVRPELFEELIAAGVQKAESKEWLVAEEIFFAASGLDPERPEPFINLALMHE  
EHAKQLSDAGDEAQA EKEDELAKHYQHL LAAKQAFPPAYYHAAFFFLRKHNYDRTVSL  
TSYIGMNDDEERTNKAKSILEKLSSMGYLDTLFKEAYDFIQMGEEQKGLERAKQFVDFKFP  
SVWNGWFLVGVWAHRR LGNWSEGAQAFATALEKGAEGADVFNELAICQMEMGDLEAARSNL  
ERALRLEPENVKIIVNLGALS YRQGRYKEAEGFFRAALEFPEDRIAKEWLKRFDSAGGS  
AESTGEQNQ\*

>SPBIB\_v1\_50007|ID:27161918| putative Calcineurin-like phosphoesterase [Uncultured spirochete bib]  
MDHDEESSNGTLPASQELEKALEAVLAAAGTIPSSIRPRAPKGSYPGGLIQLPSDKPCVL  
VPDVHARPDFVESLLLSVFPGIEGTLDAALGKGLATLVFLGDIPHAEGELAARRWNRA YE  
RIVREHDAHAILCP EMDEEMGLSLAALLEVIDLQCRYPSSVFCLKGNHDMTNAADHGDL  
PFYKYADEGRMGALWLEMRYGEKIARLMRRYELSLPVVACSKNFCASHAEPAPPLDKERV  
ISFREHSEVVQALIWTANDEAKPGSVAKSLEALLDSMEKAQHSVWFSGHRPVRDNFAIRA  
NGQLVQIHNPD LWHIVFLSGNAKQADFYAVQRSGGEAAHVCSLILDPERRR K\*

>SPBIB\_v1\_50008|ID:27161920| conserved exported protein of unknown function [Uncultured spirochete bib]  
MAVRKKKRTSAKTGCLLWAVAFLLVLLVFLVKFNDIRSAVQKTGFLDALNHAVSKPASQE  
KPVQPSAPASPPSAVTQPPGSQPAITQGLPKDAEKPGQTPPQSAPQPEQKPEAQTSPSP  
AEPGQQIQKTRSAVL YFVHIGEDGTISSERVKRVLPLTDSPIQDTLETLLKGPTSELR  
NLISLIPSGAKLRGISM RGSTVLVDFSDGFTYNRYGKEGYLAQLKQVVFTL TEFQNTDV  
QFLIEGKMRPFISEGVPLDKPYSRAS F\*

>SPBIB\_v1\_50009|ID:27161919| protein of unknown function [Uncultured spirochete bib]  
MFVLPVSVQAEERSEEVS AQVFPHLSVALELLQAVNPVAESQQMAAKLVRTAVLVFPERQ  
VSKQRDSMHPENRFSVPRSEYH\*

>SPBIB\_v1\_50010|ID:27161921|gcvT| Aminomethyltransferase [Uncultured spirochete bib]  
MAPFAGYDMPITYPTGAIEEHLVTRRSVGLFDIDHMGQLEISGAGADAFVSRMVTAKVSD  
LVPPMARYSLLLDEKGGVIDDLFIYRLPQSWWIVVNASNRAKDFEFWKAHAPEDVA VVDR  
SDDTYMIAVQGPRAIELIDKVANMAVSSIQRFNWGNISIDGVPVLFGRGTGYTGEDGGELF  
FPAAEAQHVVWELL LAKGEALS IETRPIGLAARDLSRFEAGMPLHGHEISTEINPIEAGFK  
WACDFEKEFIGKEALLAIDKGVSRKLVGIEVFGGVPREGYEVTSPDGKDIGHCVAGMFC  
PTVKKYAANAFVLPDYAKVGTEASV VIRGQPRKAVVVKRPLYLPAYRR\*

>SPBIB\_v1\_50011|ID:27161922|gcvH| glycine cleavage complex lipoylprotein [Uncultured spirochete bib]  
MAIDKNARYLESHEYAKPEGGNFVIGISDHAQ AELGDVVVELPAVGKTIK GATFGTIE  
SVKAASDLYMPVSGTVVEVNEAVKNDPALVNKDCFGAGWLIKVAPSNPAEFD SLLDASAY  
GKAIGEE\*

>SPBIB\_v1\_50012|ID:27161923|gcvPA| putative glycine dehydrogenase (decarboxylating) subunit 1 [Uncultured spirochete bib]

VPFIPNTDAERTEMLNTIGVESVEELFSDIP AHLRIQKLDLPDGVSEMEALAALDALAER  
NAQTTKMDWVFGAGAYNSYIPSLVPALASRGEFLTA YTPYQPEVSQGT LQAI FEYQSM AA  
KLLGMPVVNASHYDGATALAEAVLMAWKAKEGRNRILLPADLHPEYAKVIATYLT SFDIE  
LAR YDGDPERASLDERTAAVVVA YPGFSGEVYPVEKAAARAHAAGALCIVQADPVMCAIF  
KSPGEQGADIVTAEGQSLGNPLNFGG P YLGMLGTTEALLRRMPGRIAGETKDKEGRRGFV  
LTLSTREQHIRREKA VSNICSNQGLSMLQTCIYLAALGKQGLRHVAKQSYDKAHYAAELI

GRIPGFRVATKQFFREFLVQTPKPAADIARALAKKGIVPGLPVSRYFPDKPNELLVCVTE  
MNSRPQIERLAIALKEASK\*

>SPBIB\_v1\_50013|ID:27161924|gcvPB| putative glycine dehydrogenase (decarboxylating) subunit 2 [Uncultured  
spirochete bib]

MNTMNMNRDEPLVYELSRPGRIGCTLPRSDVPEYALPEGLVRTDLDLPELDELTVVRHFTR  
LSQKNFSIDTEFYPLGSCMTKYNPKANAAAAHSGWKNLHPLVEPEHAQGALELLWRLQE  
ALQKIGGFAAASLQPAAGAHGEFSGVLMIIHAALKDRGELGRKKMLIPDSAHTNPASCTM  
AGFVTQTIPSGPDGNIDIAALRAALDDTVAGIMITNPNTLGLFETNIEEICRLVHEAGGY  
VYGDGANMNALTGVFKPGSSGIDVMHFNHKTFTSTPHGGGGPGAGMIAANEALAPYLPGP  
VAVKRGESYRLEMPAKSIGQVKAFYGNFGVLVRAITYLLMTGGNGLRRVAENAVLNANYL  
KALVEGVYPVPYKRHCMHEFVAKGTIVPGVHTLDIAKRLIDYGFHPPTIYFPLIVQEALM  
IEPTETESKETLDQYADAMLKIAKEAAEQPELLHDAPHNAPVARLDEVMAARCPILCYRG  
\*

>SPBIB\_v1\_50014|ID:27161925| putative undecaprenyl-phosphate N-acetylglucosaminyl 1-phosphate transferase  
[Uncultured spirochete bib]

MLWLSLATAVVLSSVLMPLIIQFCHRHQLYDRLNDRKVHSDSKMPRLGGIGIALAFILSI  
VIIRIFQIDEFHQLYDGYRLWPIIAGASIIFLTGLLDDLDLTAWQKLTLSAAAIMVML  
AGYRFKFLVVPFGSGVWNFGLFSYPLTFLWIVGITNAINLIDGIDGLAGGISGLAALAF  
LFFMFTSNVLPAEICLALVGSIIIGFLIYNLPPAKIFMGDSGSLFLGYVLAIPLLSQYKG  
FQGTDIGVLSAATVLSIPIFDLTMAMYRRFRAHKSFFSADRKHLHHQLLDRGFHTSEILL  
ILYSLTVVLAMVSLSMLFIPLSWSFVLNVAMFGAMLLYFLRFSRPDREKNMHGPL\*

>SPBIB\_v1\_50015|ID:27161926| protein of unknown function [Uncultured spirochete bib]

MLIIVRSHQILQCSLNILLKKPRAQRFRVSPNLKQSGQSRATFYVRRERMSAIITHRRL  
LQVFLRLAILGLVLASMAACAIEAPKSQGTLRICILPGEFTHYAAKGIPKGGAPESA  
SSAALRLIGPQSGWQIASYRLTCTSPERGEIITKTLGRASGDITLVGGWNILAEGLAADG  
SIIVENQTQIDVSAGRTINLPISHLAKGKGSVQITFSTTQTPNASWKYSLSLEFLGLPG  
DATAEGPPAYTAEFAATEQSFNAADLPSGYYRLTVQLKDNTQATLAGSVETILVLPGRIS  
AGNCDIVLADPSIDISLSPLELSAKAAIGVDRFLNKNKKMLVPLAVAEENANLIDWF  
ANGEAVGGGLETGNQILTGYRLHFGTIDAPGAFSFLKMDALLTDPDTKLAQVVTQKSTNV  
SPPLSAHAEWIQSMDYRAALTKALHDNGDPANQGTGVPSDAKWVTA  
STNGFIAIAGLDKS  
SAVHLFFSTAGQEATDSNGIPVVLPAESGWIRLWRDKVVIEKSERSPDRVSLANGLLLA  
AGSSSNWLRVYVLDTAGAIVAKKDIVSGKNGAPAFANIKALKFSPDTKKLFLVLTNSPEK  
ILVFNVENLTAGEPVLAEFLFASCENPPSSSLGMEIDLALLSDGWIAACSSNIARIFLV  
HYSNDQFSSATTYASGANGESLGDPKSIVFDEQNTLMYVLGYSKKLHVFSKIDGYTGYQP  
VSTISLTNEFDKARSLALARIYSSSFLVAGGGQSMGIIALDAAGQPIAQSSLASVDANY  
AGIASIMNIAALGDTIVAAAGTSGLASVFNIF\*

>SPBIB\_v1\_50016|ID:27161927|glgA| Glycogen synthase [Uncultured spirochete bib]

VKILFVSSEVTPFAKSGGLGDAVSSLATALSRAGHDVRILLPRYYFISKNTLRRTNGLLE  
IETAREHYHAFLYTTAMPNSQVKIYFLDCEPLYGRNGIYGYSSAQEFDPNPARFSVLSKA  
AFAACRSLGWIPDIMHANDWPTSLVPVYLNTEKNTFSDTAGVLTIHNLGYQGIYSRDH  
FPELGLGWEYFYGAGFEYYGNVNLKAGIVSAECITTVSPTYAREIQTPNGGFGLDGLLR  
QRSRDLVGILNGIDVDIWNPAADPYIPAHYSYKDMGKAACKAALQKELGLPSDPNVPI  
GMVTRLVEQKGISEVFGRTYGCMRKILETIHVQVAVLGSQDAWAEAIMNYSAYPQFKG  
VVGYNERLAHLIEAGADFFLMPSRYEPCGLNQMYSLVYGTLPVHRTGGLADTVVNYNQE  
LGEGTGFMFDDLTPQAVYDTVGWAMWAWYNKLQHIQNMVRAMQQDFSWARSADEYVRLY  
EHAISLRKAR\*

>SPBIB\_v1\_50017|ID:27161928| conserved membrane protein of unknown function [Uncultured spirochete bib]

MSEKTLTDYNKNEVRERLLRTFQSGTKEWAAADLARATGLPLAQINAEMPAIADEYRGRL  
KVSQKGDILYSFPNGLKSRYRGGFPMRKLGRALGRGAAEAGKALFKIWILVTLFGYFFL  
FIALALVAFFGSIAVQGGGSRDRGDRRGGGGLGGLWLTTSLFDSMIRLWFYSELKSSSE  
ARYRDSFARRERHPLHKA VFSHVFGDGNADWDTVLKKAFAVAFVQTHKGVITLPEFMAI  
SGLKPQEAEDRITRFLVEFEGSPEVTEGALYFFFPSLLAKAGNVSAAAASTFPLKKLKS  
FSSNNKKMDRTRWVNVNLLFGSYYAWNAMNIGTDVIVRTSQGLSLRGGLTFLYSYTVY  
LASQLGAAKPAVVIGWLLGAAPLAFSVLFFAIPLIRSWRLKRENEMLKRENMRKMLYSGV

LSSPQGFDRHRAVALPTEEVPRANPKSVVEEIQHLAAWSSAEIRADGKWWFKDVEFVQKEV  
EHVRAKESDYAADRTIFDTNAPV\*

>SPBIB\_v1\_50018|ID:27161929| protein of unknown function [Uncultured spirochete bib]  
MRNIMLFQAMQKIGARNTSIISTIEPVFTNVFMMMLLGEILTGQRIVGGVLLILAGVIVLD  
RLGYSPDSTISATSSIGRSSPISKSPGTDEGKS\*

>SPBIB\_v1\_50019|ID:27161930| UvrD/REP helicase [Uncultured spirochete bib]  
MMADRIDPYLQGLNPEQLEAVRFDGTRLLILAGAGTGKTRVITTKIAYLVREKGIPEESI  
LAVTFTNKAANEMRERAMAIEPACERAIIRTFHSFGAWFMRRNAQAFGLRSEFTIYDADD  
SAELVHSVFPFASRRDCSDYAFLIAKAKDYCLAPDSPTLGFISQHPEFRRIYAA YEERLR  
ATGNVDFGDLILLPALLEKDEIIRNRTRQFRVILVDEYQDSNVAQFRLLQQLASPEGM  
LCVVGDDDDQSIYRFRGAEVNINLNFQTIFFPETKIIKLERNYRSHQRILDLAHSIVVRNMS  
RLGKLLATRPGGTPKLAAILDDQDQIEFCASIIRQHVQNGGHWKDIAILYRTNAQSLG  
FERLFPKFDIPYRIVGALRFYEREEIKDMLAFLALLANPRDEIAFKRIINKPSRGIGASA  
ISAIVEYAMQKQIDLLEASDRQAQAHGKKEGLKYFVGLMDSARSMLMSGQLQDENHPKD  
LGALISDLAQRSGLIEFYRSKDRIAGTQKEENIEELVNAASEFPLSEEGLEFLDTIMLD  
QSQQNGDSNADSVTLITMHNTKGLEFPVIVVTGLEQGLFPRNDEEGDDLEEQRRLFYVAV  
TRAKEHLYLSACRWRRLHGRLFETMPSRFLTEIDPEL YELWGASRRFAGAQRQPDLP  
SAGSETGRRGYGQSMYVQSAANEYRSQEPAPKPEKPEWEPGMSVYHDEYGS GTIIKVTPSQA  
GLLVIVRFDGSKIAQFFPKYTKKLEKVEH\*

>SPBIB\_v1\_50020|ID:27161931|rimO| Ribosomal protein S12 methyltransferase RimO [Uncultured spirochete bib]  
MPAFFIDQHGCANQVDGEEIASRLVDAGFVAVDSPENAEVIVNTCGFIEDAKKESIQ  
AIEAKRQWPEKVVVAGCLSQRYPDALFQDLVDADGIVGNADLSLIPDSIQKVEGERVL  
VCPQQASLPSAYYPRKALDFPGTAHIKITEGCSNHCTYCAIPLIRGELRSRTIEDIVH  
EARTLLERGFELV LIGQDLGNFGRDLKGRCLLPDLLEALARLEGNFRVRILYIHPDHP  
ETILPIREDRRFAPYFDLPFHASEPVLRRMNRKGSATAYLELLASIRESLPDAMIRST  
FLVGFPGETEDDFEELLQFQKKAQLDWLGAFEYSREENTPA YTMKNRVPKSIKKR  
KALIEEVQTAITGAKLQRFIGSNDTFVVEEVDFDHDLCIARGWMQAPDVGVTLIHSRQ  
NPGSAVHARIISVNGVDFNAILDYTAEP\*

>SPBIB\_v1\_50021|ID:27161932| protein of unknown function [Uncultured spirochete bib]  
VVMGKVGNI FRDTRLGKGLTLDQVADETNIKRFLQGIENDNFDGFPGEVYIIGFIRNYA  
EFLGLNPAETVARFKAAEPEPEPPS QDKSPEKPSSETPEAIEPIAKSPDTQTS  
AETKPARKEPEVPLLFTEESEEA EAKASTLSSEHAKSGKMPRTSKKQAVAKHPSEPEK  
APPAAGPASVTESEAPLAKAQPSLTDSQKEKIALSHQPFFPARKNQKVHAAP  
IQLGHFLLYALAILIII VGVVSMPLRKLPSRASRTPADYRAEGLPFEQRLYPQDR  
VYLPLGNDFISVTLKSVKDKV VLDTPYGEFTLGLNEETVINPTADKDR  
LIVSIIDYAPNEPQNGALAHFDVKEALSQQETS SDITIPASAAAPAASKAEP  
APIVLFKSASGPHPFYVNVSFVSPVMFRYEADRKEWVEKYY RKGESITVNAS  
NSITFWTANAQAVKVSVFQ SAGKSTELMMGGPGEISVQRLSWSNSQGGW  
ALVAAPLD\*

>SPBIB\_v1\_50022|ID:27161933| Outer membrane lipoprotein carrier protein LolA [Uncultured spirochete bib]  
VKRKHFFVLMFIVGFYMA LSNIGAQTLLTADQFFSKLADRYASVTDYQADVQITAGRQPM  
TGKLIKFSPTLLRIDFSQPADQVIVFDGKTLLVYLPQYRAVLRQDASDQGISLGAATLAS  
KEGLSLLRRNYTIGWERSPNEEPLDPGSTEQVYRLMLSRKSVSEGYKNIRLSVSGDTMLI  
RRLEGWTVSNDKITFD FQNVLLNQGIRDDRFVYDAPASANVYNNFLFQ\*

>SPBIB\_v1\_50023|ID:27161934| Pyrophosphate-dependent phosphofructokinase [Uncultured spirochete bib]  
MLERSPLHTARYAYTPKVPEIFLEPLPHIKALPSEVIEPKDKKELLSIFPNSFGKPAVK  
FVKGEGVPSEKAFTVGVILSGGPAAGGHNVIAGLFDGIKKANPKSKLIGFKGGPSGLIDG  
KYLEINADMLEQYRNTGGFDIIGSGRTKIETPQQLKSFENAIKGLDALVVIGGDDSNT  
NAALLSEYFIQKGA PVTVVGVPKTIDGDLKNEWIEISFGFDTATKVYSELIGNICRDASS  
GRKYWHFIKLMGRSASHIALECAFQTRPNIALISEEIEAKQMSLAQIVATIADAIAARAA  
KGENFGVIIPEGLIEFIPEIKALIAQINEIIAAAGSEYESLPRGEAQRSFILSKLPAET  
AALFSQLPESIQ TQLCWRDPHGNVQVSRIETEKLLVEMVSRRLKEMSAEGTYTGTFDYQ  
THFFGYEGRCAPSNFDADYCYSLGYSACLLILHGLTG YIAAIRNLAAPPKEWIPGGIPI  
VSMMNIERRHGKEKPVIKKALVDLEGKPKFAFAQVRDKWALSSDYRIPGSIQYFGPPSIT  
DVPAILQLEQNS\*



>SPBIB\_v1\_50024|ID:27161935| putative LysM domain/M23/M37 peptidase domain protein [Uncultured spirochete bib]

MARRAVVIAISLLSLFFMPLGLCGAEQEYHVIQSGETLYSIAKSYSVPYEMLASINGITD  
PSKIRPGTVLLIPLVHVVAKGETFFGIKKYDVSIQELKTANSLSDSYVLRVGDVLPD  
KGVAAATPSQAAPAQPAPVAASPADTAPPSSAKPTSATPAASIPAAPPSAPAAASPADTA  
PPSSNSNSKNASAAASRTPDALSIWPVEGKQYMSGKLEGIMFQTTTRGAPVKAVASGTVV  
SAGPSRGGFDVVFIQSKSGFVYVYGGNESILVKTGENVEPGKTIGRVGIDAKDGTAIAYF  
FVFRNGQPIDPSLAPRD\*

>SPBIB\_v1\_50025|ID:27161936| RNA polymerase sigma factor [Uncultured spirochete bib]  
MSDLENCNTGSSSERPTRKNEDSMADLDPLSLYLRQISKYPLLDASREKEIGAHLADLGA  
QLTQIDLAIKPDNAELERERNRIAADIRATRELLITSNLRLVVSIAKGYQMRGVNLLD  
LIDEGNIGLIEAVSRFDYKRGYRFSTYASWWIRQAIKCLVDQSRVIRLPIHMLNTIRRC  
YASAKQLVQELGRDPNMLELAEKMGIPQNKVESAMQLAAGTSSLDAGLDEERNGSIGDSV  
KDEKAPDPFNQAFATIRELLRYVMCSLSEREQIVLQLRYGLNGEGPKTLEETGHALGIT  
RERVRQIQEQALEKIKQRQELSDCRT\*

>SPBIB\_v1\_50026|ID:27161937| putative ankyrin [Uncultured spirochete bib]  
MQKHTLRPTRLGFMILALLIAGCATSPASNKEVTLSDLVIKGDIEGIRKIFYANQEQLN  
KADSQGLYPLHYAISRGDAQIAEILIVLGAKPDNKDLSGKTALRYAVDRYPTEPAKQKEI  
IKMLVDRGADPFLPDVAGTSPAQVALKSDINILDAMFNKNINNTAADGRTVLHYAADAL  
MTKEVELLSKGVSVQIKDKADRTALDLVLLYDPKLEAAQIAEKLILKGANPSFPEFVWF  
AQTVRAPDYNAVRFANGNSPLHEAISRYQYGFASLLLKADPNKNLNKNGDAPHLAVKA  
GYVEGAKLLSMNANQDILDANHNTPLLLPIPAARRLEMIKLLLNFKANPALADNQGNTF  
LHKAIVIQSYAPEIVETLIQAGAPVNAQNANGDTPLILCVRSGRYEYAKPLIEAKADIFKM  
NQAGENALKLAISKGYQAVDSIVLSANVNQSDDNSNSVLMTAVSLKAPTDVLLKILAKGA  
DPNARNKALDSALHIAVRQNYAEQGIVLLDANADIFQYNSKQENPLFLALTAKPAPLEWF  
FRPNVIAARDANGDSVVHHAARKNLPDGIAYLVKKGADINVLNNAEETPLHTAAKYDAVD  
AIAYLARAGSSLEAADIKGDIPLQSAVLAGAARATQALLVAGSPIDNQNYSGETALHQAA  
KNNISAIVILLAANGAQTEILDSRGTPLAAAAANGAFESANELLKAKAQVDTRDNGST  
PLFQAVSGEHIATARLLLANGADMHALNARGLSPFKLSLMKNAQVTAEFFAPWLINKPDS  
NGDAILHMLAGSSAGPDLIEAALKNGANPNARNARGDTPLMVALKKNDIVTAAQLINAGS  
SVFASNADNISALSMIFGMDSGSRTKLLSAILSSIKAPKTDFAGESLLHYAVRANNKEAV  
ADLLALRADKSIRNRKGEAPLDIAQSKGFQDIVSLLTNN\*

>SPBIB\_v1\_50027|ID:27161938| D-isomer specific 2-hydroxyacid dehydrogenase NAD-binding protein [Uncultured spirochete bib]

MKIGSFMPLNSVWGPAIKQLRDEFPQHAWLEGLKPESSEIGSLDAMIAGRIPLEVFERAH  
SLKTLFQPFVTGNHLPASLLERNVEVYNVHSNAFDVAERALAMTLAFYGRLLIEYHNDLR  
NEIWHGFVWNRGAEDNWDSIYGKTCAILGTGAIGVALAKLLKAFDCTVYGWRKSSSTATVP  
EHFDAIFPTMREIDA AEIVFIALPATAETEGLSKEILAGMKGKFLVNVGRGSIVNEEG  
LYEALKNLILKGA AIDTWYTPKTGVIGAPSRYPHITLSNVILSPHVGGSTNQATRAVD  
DTLKNIRAFRLRTGKGIWRADLSRMY\*

>SPBIB\_v1\_50028|ID:27161939| protein of unknown function [Uncultured spirochete bib]  
MKLLFVQLPSQMPDWSSAPANVPLAAGYLAAYAESKILARREWSILEPEIANYGSDSSI  
VASIAAREPDIVSFTLYSWNLERSLFIARLASLLPHARLVAGGPEVVEHMPVTVRTPFH  
SLVFGEGEEAFVDLLRDVQQHRPLAPSYSANALADLEKVPNPYLAGTLRFDPSTQVHLET  
MRGCSAKCAYCYYGKNYNTLRRFPKHVLDVIRAASEAGVPEIYIMDPNFQTPDFAGRL  
RDIA YANHARTAIHTELRLLEGITEEIAAGLLKEAGIASVEAGLQSTNPKALEAVHRTFDRK  
AFERGAELLQKQKILVKTGLILGLPFDGYEQVIETFDLGMQGLGQEAELYPLSLLPGTE  
IRERADEYGMSAMEIPPYLVTSTHWISYDDMVDAIAAFEESEFDVEWAMPAPHFQFLKEG  
FVSFIDTRRPENIDWMRLNPEKLSNSMTLLVDSDDPEILVRIVRAARDLRKDNPFPLYQV  
VLTSETRIPSEKLVERVREAFLEHPEHYELANSFSPDPQTSYQTRMFFATKNFALAYRAL  
EEAQDMETMVVLNAKGGYNAERLAELLPYVVFQKQTLPFDRLYELISYADFPHMLIEAP  
EGLF\*

>SPBIB\_v1\_50029|ID:27161940|aat| Leucyl/phenylalanyl-tRNA--protein transferase [Uncultured spirochete bib]  
MRWITMPAYLDEAEYRFPASGASRNGVVCYGGNLSPGVLLSAYRQGIFPWPSTPDTLR

WCSPDPRFVIPRGFLYITESARKALKKALRRGSPYTLTDKAFIDVISNCAAIPRPSQPG  
TWIFPNLVNAYTELHGRGYAHSVEVWKNALVGGLYGVSIGAAFFGESMFSTESNASKIG  
FLALAITLFEQGFDFIDCQVYTPYLELMGGIDVPRELYLEMLQGALQKPTIKGDWSRYFQ  
NFPEVNLIIAAKRNIETITHNA\*

>SPBIB\_v1\_50030|ID:27161941|clpA| ATPase and specificity subunit of ClpA-ClpP ATP-dependent serine protease, chaperone activity [Uncultured spirochete bib]

MKVSPEVQAIFNAAYNEAKLRNHEYLMPEHILFASLSFEKVRNILENCADADLEQMRHSIE  
AYFEQKMPIVRNAEPIQSAGFQAVIERAVMQSQSAGKEEVQISDLVVSLEYDEERTYAGYL  
MRKLGIKRLQLLEVLSHGMSDEIDIEAESLTEEETEEHPEEGGKERRAARPGTLERFATDL  
TALAAAGKLEPVI GREAEIERTIQVLCRRLKNNPIHVGDAGVGKTAITEGLAQRIAAGKV  
PPKLQGYTIWSLDMGALLAGTKFRGDFEERVKKVIDLLLKKEKSILFIDEIHTIIGAGAV  
TGSTLDASNLLKPALTSGLRCIGSTTYDEYNKIFEKDRALSRRFQKIDIVEPTIPETVE  
ILKGLRPKYEEYHDVRYSDETLEIAAKLAAQFITERKLPDKAIDVIDEAGALARIQAYKQ  
NQDAQVKTIELTPHDIEVVIKARIPERTVTSSEKDKLATLESTLKLEVFGQDQAI EAV  
VRAVKRSRAGFRAPDKPIANFLVVGPTGVGKTELARQLAKHLAISLHRFDMSEYQEKHTV  
SRLIGSPPGYVGYEEGGLTDAIRKTPNAVLLDEIEKAHPDIYNILLQIMDYATLTDNQ  
GRKADFRNVILIMTSNAGARDIGKPLIGFGDQAVSVSALDEAVERAFSPEFRNRLDAVVH  
FNNLPMDIIRIVRKAIDEFRVQLAEKNVTLEVDDEVVHFLAERGYSREFGARNINRLIE  
DQIKTVFVDEVLF GKLEHGGTAVAHIEGDKIAFDITPHVS\*

>SPBIB\_v1\_50031|ID:27161942| ATP-dependent Clp protease adapter protein ClpS (modular protein) [Uncultured spirochete bib]

MGTRVTNATGTQELTQHDLETNEPEEYRVYLINDDFTTMEFVISILMTIFHKSLAEATKL  
TLEVHRKGRGMAGVFPYDIATTKIQQVHAMARQGRGFLRCIMEKA\*

>SPBIB\_v1\_50032|ID:27161943|thrS| Threonine--tRNA ligase [Uncultured spirochete bib]

MSADIDRIRHSLAHVMAEAVLHLHPGVQFGIGPAIQDGFYDFLFPQSIANEDLPAIEKE  
MRRIIAQNTFVREEVSKAQAREIFRDQPFKLELIDGLEEGTISIYRQGFVDLCRGPVH  
ESTKELRPDAFKLKTIA GAYWRGDETRPMLTRIYAYAFATKAELEAYLRMLEEAERRDHR  
KLGKELDLFSTHEEAGPLIYWHPKGGRVRVELEKWWREEHYKNGYEILFTPHIGKSWLW  
ETSGHLGFYKANMYAPMTIDEDDYIKPMNCPFHIMIYKTTSHSYRDLPLRWAE LGTVYR  
YERSGVLHGLMRVRGFTQDDAHICTPEQIEDEILEVLRFSLSMWKTLGFSKIKAYLATR  
PADSVGDPERWDQALVSLKKAIEKEGLPYEMDEGGGAFYGP KIDLKIQDAIGREWQMTTI  
QFDFNLPERFDMTYVDKDG RQKQPYMVHRALLGSIERFFGVFVEHYAGAFPVWLM PDQVA  
VIPVAPTFDEYAKEVTAFLRGKGVRAKAMLSEERMNAKIRDAQNQKIPYMVILGQREKDE  
RTVSLRLRTGSQENGIPLTFASRVLGKIEAKALDL\*

>SPBIB\_v1\_50033|ID:27161944| putative dihydropyrimidine dehydrogenase [NADP+], similar to dihydroorotate dehydrogenase [Uncultured spirochete bib]

MADLGTWLMGLRLRNPIIVGASGLTSLPDGVEKAAHSGAGAI VLKSLFEEQILAVLGQEI  
AGLDIDSYPDAAFISRTAWEESTDEYLKLIDESKKRTSGVPIIASINCVGPGN WASF  
RIEEAGADALELNIA YVPFSPHISGQIEHKV LSTVKEARLATKLPIMVKLGNNY TSLPH  
TVHGLSKEGANAVVLFNRFFRDFNLD TMRLTGVQPLSSETEYHESLRW TAILYKRA GVE  
IVSSTGIHTADA AVKCILGGASAVEVCSIIYQKGWKAITAILEEMDSIVESMGYSSLD AI  
QGKLSAANAERPEEYLR LQYIKAL TG VY\*

>SPBIB\_v1\_50034|ID:27161945|ytsJ| putative NAD-dependent malic enzyme 4 [Uncultured spirochete bib]

MKLNRLDNLSEAFPDDLTPDQRARAQTLFLKALSEKAHRFYEGKIQVVPKAGLYGFNWF  
NVWYTPGVSKISTAIRDNNDQSFALSNRGNLVA VVSDSTRVLGDGDCTPPGGLGVM EGKS  
FLMKYLGGVDAIALCINSRGKDGKPDADKIIDFVKMLEPSVGAVNLEDISQPNCFKVLDE  
LREACDIPVWHDDAQGTACVTLAGLLNALELAGKKLSDAKIVLLGAGASNTTIARLIMAD  
GGKGENMIIFDSKGLHRNRKDIEQDTRYR KWELCQATNPQCIETEAEALKGADVLIAL  
STPGPDTV KREWVRSMAPKSIVFACANPVPEIWPYAAKEEGAYIVATGRGDFPNQVNSI  
CFPGLLKGALLVRARKITDNMAIRCAHSIADFAKSRGINTENIIATMEETE VFAREAADV  
AMAAIEEGVARVTD TWENVYKKAKEDILES RSLTKDLMDRGHIAPIPEEMLKEAFDYAVA  
EVRKK\*

>SPBIB\_v1\_50035|ID:27161946| putative amidohydrolase [Uncultured spirochete bib]

MKIALAQFRPEFGESDRNIERLLRLCKENPADLYILPELAYTGYQFVSQEEVHALADSVH

SRRIEAFRNAAKELDACLIFGFPELAGAVIYNSALAVLSDGREYLYRKTHLFYKETLYFS  
PGDTGFPVFEYRGARIGMAICFDWFFPESFRTLALKGADIIAHCNSLVLPYCQTADFAAA  
VQNRVFIATVNRVGAEQREDEQLAFTGESVLVSPKGEYLLRGPIEDEAVLVAEIDPEAAR  
NKSINPYNEVFKMRRPGMYTLQ\*

>SPBIB\_v1\_50036|ID:27161947| membrane protein of unknown function [Uncultured spirochete bib]  
MRLFPRPQNGWLKRALILLGAMAFLSVFATIDTSEHFRTWRTARMWTSEQKVTAQAEDAA  
AMFAIASASVIFNTAIVAFSAVGALALGISVALDNRKWLVSWSAIGLCASACGILYSFTV  
IYKIRIGERHILKGPFDYNLALQPPVIAIVGYILVFILWIALMRSARANQAGQGGQ\*

>SPBIB\_v1\_50037|ID:27161948| protein of unknown function [Uncultured spirochete bib]  
MNEEKGTQMADIQKKKPHHLKRPVLTACMATIFALTIAVLTDASHFRNRSSDILFIEAIA  
LVIGAWASYLKSRLSFLVMHPFRRKNLAESWIDRVPEKFGVSAQEMDAEARSLQIQRSR  
EFRDLAIASGILLATGLIVQYI\*

>SPBIB\_v1\_50038|ID:27161949|aliB| Oligopeptide-binding protein AliB [Uncultured spirochete bib]  
MYKKIALALVALVLLSAATLGAATPKSKDYVYVFSTDPRSFNLYLNDQRATNTQHITNFVD  
ALLEHTRYGILRPALAESWKTNDDFTVWTFNIRKGVKVVADLEPYADVKAQDWVDALKY  
MLDNKSTLTYLIDGFVKNAGAYLQGGKITDFSQVGVKAKGDYVLEYTLEKPTPYFDTMLTY  
NAYYPVNGEFLKTKGKDFGKVDKNGILYNGAYILSNYTSKSVIEYDANPTYWDKGNVSIQ  
HVKFVYFDGKDPDSLNNFDAGVYVAAPVYTDNEALFARAQAKYKDYIFRARQDSTTFVY  
AFNYDRNAFASPADPTKKGKSPKSKAKEDTKKAILNRNFRKAIFFGIDRPTILAQRNGDV  
NKLAAAIRNSYTAPELSFDIAGKDYVKYVEDALKSRNPADFPASFKLDDAQPYYNPTKAK  
AYMAKAKAELTKQGVKFPIELDVAADVSYTKGMKMDQSLKAGLEALFGTDTIKVNVVEMD  
SDNYDASTYYAETGAQSNYDIGNTTGWGPDYGDYPTFLQTLEPVVGALLTPIGLDPVDEG  
SDKAAATAIGLYEYAKKVEAGNAEYKDYSKRFKLFADAEAQLLDDAAILPYMSFGGAFQV  
SRVIPYTAPRAAYGADEYKFKGVIVSDKVVSLAEREKYRQEWKQRQAEYKKNLAKG\*

>SPBIB\_v1\_50039|ID:27161950| ABC transporter, permease protein [Uncultured spirochete bib]  
MRGFMKGYVLKRILQSLVSVFLVSTLTVFLVFSCIPRQLVFKGDQMLQKLANRPDEYQDY  
KFRTWESLGYLDYITMKEYAQSIYGNDSQVSTALQSGSSFYERFRAELQAKRYTVEAQP  
VTGYLYAYKDIPTMTRVLRWYANLVQVDHPWRVKDPNPNLKRGGYYFTKDWSGMPALAAS  
GTLKYQIWIWIDGSPFLHQNIHLYMGRSYPTYDGIPVLEVIGMGQGRARREVTTKVGG  
QEVTFYTSIDEHTLKYKPDLDRLDKNKFEDNYADGNNIYQDPSMLGISFRIGIMSLISL  
GIGLTIGVVAAMRKDKMFDKVTMGYIVFISSIPTLLYIALFARFGMKILGLPDKFPFLGA  
QNFLSYILPTLSLSLGGIAGEALWIRRYMVDQMNADYVVKFARSKGLTQGEVFFRHIVRNA  
LPIVHSIPMAVIGTLAGALITESFYAVPGMGKMFSSISDYNAMIIALTFIFTFVSVF  
AIFLGDILVTIVDPRISLAARKEAR\*

>SPBIB\_v1\_50040|ID:27161951|amiD| Oligopeptide transport system permease protein AmiD [Uncultured spirochete bib]

MTDKTAEKFTYATFDILQSEHIAGPKYSYWKSVFQTFKFKKWSVFWLVLLVMTLMAFIQ  
PLLSGYDPAIAPNINKPETWYLKPSAQHWFGTDDRGNMWNVWVWAGTRMSLSIALIAAAI  
NIGVGILVGAIWGYSKRIDPILLGIYNVVSNPVILRSMMLMYIFGRGFVQIVLAMTITG  
WLGVAFFIRTQVMIIRDREYNLASRCLGTPLKRMVTRNLPYMVSVIATLIYQEIPGLIN  
TETVLSYLGIGLPTTYPVSLGRMIDTYWSFVDYTPHMIVFPGIVLGLITISFYIVGQLFAD  
ASDPRTHR\*

>SPBIB\_v1\_50041|ID:27161952|oppD| oligopeptide transporter subunit ; ATP-binding component of ABC superfamily [Uncultured spirochete bib]

MDTPNIILSAKDLVVKFRVRNKELTAIRHISLDFEGETLAIVGESGSGKTVLTKTFTGM  
LENGRIDNGSIIFEGQELTKLKTQKQWETIRGAKISTVFQDPMTSLNPLKRIGIQITEV  
IEKHQKLPSAEAKKIALNLMERVGKNAEQRFDTYPFQYSGGMRQRIVIAIALACKPRIL  
ICDEPTTALDVTIQAQILDLIRNLQREYGFYIYTHDLGVVANVADRVAVMYAGQIVEY  
GTVREIFYDPKHPYTWALISSLPTLAEKDKPLYAIPGTPPTLFSDIKGDAPRNRALK  
IDFEEPPFYQVSPTHFAKTWLLDPRAPQAEPDAVKIMRERGRKNTKQTSEAQQ\*

>SPBIB\_v1\_50042|ID:27161953|oppF| oligopeptide transporter subunit ; ATP-binding component of ABC superfamily [Uncultured spirochete bib]

MNAAVNAAANARNNEPLLSVKNLEVTFKNGNTSFTA VRDVSFDIMEGESFALVGESGSGK  
TTIGRTIIRINPASKGEIYFKGKRISGIIDKETDSWVIRNIQMIFQDPMASLNERATIDY

IVSEGLYNFNLFSSSEERREKAFRALRDVGLLEEHAERYPHEFSGGQRQRICIARVLVME  
PNFIIADEPISALDVSIRAQVLNLLKDLKKERGLSYLFAHDLTVVRYFADRIAVIHQGE  
LKELARTEELFSRPLHPYTRSLLSAVPLPDPDLEKNKLLVYDPATMHDYSKGLPSWREI  
FPGHFVLANDKEAEEYQEMYR\*

>SPBIB\_v1\_50043|ID:27161954| AAA ATPase [Uncultured spirochete bib]  
MDTVSVNVDGYGEVAVPAGTSAELVLEQANIEAASRPKKNAPPLAVLINNELAPLSAPI  
GAPCSIKPVYPPDSPMGTEVYRRSLCFILALAAAREIVPSRRLTVSMAIGNGYHYHFDNEP  
VSAQLLEALSRRMRELVLSDLPIRIVTRAWEAELEYFKTSNQSDTLALMEYINDPFIQMN  
ECNGFRDFHIAPLVPRTGLLSVWELVPYRRGMLLRFPHTKTPYEMDPFSDVPVLYDIAEE  
YEHKARILNAESVGALNRINQSGNIQDFILVAEALQNKKLALIADRIAEEKSDKTKVVLIA  
GPSSSGKTTTAKKLAIQKVLGFRPIHIELDNYFVDRSRTPLDKDGKPDFECLEALDIEY  
LNQQLDLDFDGKEVELPLYDFKSGTRKASGRKISLSNNEILILEGIHGLNDRLTPHIPAE  
NKLKIYVSALTQLNIDDHNRVRTTDYRLLRRMVRDYNFRGHSQAATLGMWSSVQRGERLY  
IFPFQGSADIAFNSALDYELGVLKVFAEPLLQAVKPDHDEYPDARRIQAFISRISPISPO  
YVPSDSILREFIGGSVFKY\*

>SPBIB\_v1\_50044|ID:27161955| Transcriptional regulator, LacI family [Uncultured spirochete bib]  
MSKVTIKDIAQRAGVSKTAVSFALNYPGRISKKTYEKIMAIVEELGYVPNPFARTLTTKR  
LGAIGLLLQKIGDIFGNPHMAQIISGIGEECERREFSLAILPLIRGKIIEAARKSYVDA  
LITIGVGPDHEVVDLLKKNHIPFVTIDGEESENTINIGIDHKNAAKEIMLHVLQQHRDI  
AILALEADTKPIESTHTSIVLQRRFQGFQEALEEFSSISLAEPSVQILNCKSSMQAGHESV  
QILLSNAKRPTAIVAMSDIAAIGALVAIKENGLRVPGDIAVAGFDDIPESLSPALTTI  
FQPGRQKGTEAARMVLNMLDGAQGTHIKLPYKLIVRESTLRA\*

>SPBIB\_v1\_50045|ID:27161956|yjbG| Oligoendopeptidase F homolog [Uncultured spirochete bib]  
MAKAIPARSEVPAEHKWNLSLFFKDDAAWEEGLAALGAMLQDAEACKKAGIGHSAEAFLA  
ALSAYEQYLILEERLGYSHLRVTEDEGNSTARGMFARFVGVSSQGQAAWSWFSPAIVL  
DDAFLQACLADPKFAGYRVFLEKLRRFKPHVLSEAEERLLALQAEPAQTAQEAQSVLTVN  
DLNFGTIDTPEGPKPLTQSTFASFMRMPDRSIRKTAYLQFYTFESHQNTLGSLYAGSVK  
LDKYQAQVRKYPSARAMALFPDNPESVYDNLIATLGKNLPSLHRYKLRKKILGLDEL  
HYDVYVPLVRESRATHSYEEAVDIVTEALKPLGEDYISVLRKGLTSGWVDRYENKGGKRS  
AFSAGTYTGEPYILLNYKDDVLHDLFTIAHEGGHSMHSWYSSRSNPFMCYNYTIFEAEVA  
STFNEQLVFSYLYQHSTDAMQKAFLIANRIDDTLATLFRQTMFAEFEMRAHEIVEAGQAL  
TVDVLRKEYRALLEKYFGPELVFESVSDLEGLRIPHFYNAFYVYKYATGLSASIALSERV  
MKGGKEERDAYLGLKSGGSKFPIEALKLAGVDMSTPQPIEAACRFADDVNELARLLSI  
SLD\*

>SPBIB\_v1\_50046|ID:27161957| putative Ribosomal RNA small subunit methyltransferase E 1 [Uncultured spirochete bib]  
MNLCLDSGDEFQALPVSDRRAQHILRVLEKRKGDRIAGTSDGRLGYAIIAIGNDEIT  
LHFFPESLAPPLRPLTVLLGTVRPIQGARIVKDLATLGVASIVFFPTALGEKSYTQSNFY  
KRKEYIQHALDGAEQAGNPRLPEISIAWSLKKALEAIEHAEGTKLVCHPDIAALPLSQIQ  
VEQTPVILAIGTERGWTQDELALFERANFSLCALGDRILKTETAIAIAAVSVILSKLNL\*

>SPBIB\_v1\_50047|ID:27161958| putative reductase TDE\_0597 [Uncultured spirochete bib]  
MILKPMVRNNICINAHPPQGCRAEVRAQVERAKAFRDRLAGFGKNGSNVTKPFHVLVIGCS  
SGYGLASRIVAAMAYGADTVGFSYKAPSALKPATPGWYFNNEFDRLAAQAGLFARTFSD  
VDAFSYEAKTKAIEVARERNFRYDLVIYSLASPVRTDPTGELYRSVIKPIGRQYAGRSL  
DVFTGKISEATVQPATDEEIAQTVMGGEDWQLWIDALNKANVLPAGAITLAYSIGPS  
FSWPIYHDGTIGQAKLHLEKTAHALTSCYQENGLRAFVSINKAVVTRASA VIPVIPLYV  
ATLFKVMKERNIHEDCVDQMLRFLSERLYRKDAAQIPTDQEKRIRIDDLEMGSSVQSEVS  
ARISRIDESNL YLLADPEGFKSDFLRAHGFVPGVDYDQEVSSFE\*

>SPBIB\_v1\_50048|ID:27161959|fabZ| 3-hydroxyacyl-[acyl-carrier-protein] dehydratase FabZ [Uncultured spirochete bib]  
VNHIETYLPHRPPFLFVDDAHIEGETIIATHTFHDDDWFFKGHFPSFPIVPGVLLVESMA  
QAGGVGAKLMGIYPKSLFMFAKIKEARFKRPVRPGDTLKMELNVRASSVFLHQKGVGKV  
GDEIAVEAEWISSSGVPE\*

>SPBIB\_v1\_50049|ID:27161960|fabF| 3-oxoacyl-[acyl-carrier-protein] synthase II [Uncultured spirochete bib]

MKEEVAVTGLGIISPIGNSIEEFWKNCVNGVSGIGPITHFDASNVESKIAAEVKNFDASL  
WIDRKEARKMALFSQYAVAAAQAWNDAGLPATMDSQSAEKSASIDPYRIAIVIGNGIGG  
LEVFTESHAKMLQDGPDRIPPMTIPLMIANEAAANIAMRFGIHGPALTQVTACASGTDAL  
GQALDLIRSGRADIVIAGGTEAAITEFAIGAFCRLKALSTSYNDRPELASRPFDRDRDGF  
VMGEGAGILVLERMESAKARQAPIHAVFAGYGATCDAYHLTAPQPEGLFGAKAIEIALKD  
AALAPEDIGYYNAHGTGTELNDQMETRMLKTAFGPLAQSLQISSTKSMTGHCVAAGAIE  
AIVCIQALKTGILPPTIHLNDNPDLENGCDLDYIPNSARTHKINAAMSASLGFGGHNGVVI  
FAQP\*

>SPBIB\_v1\_50050|ID:27161961|fabH| 3-oxoacyl-[acyl-carrier-protein] synthase 3 [Uncultured spirochete bib]  
MSVLIRAISAYVPPIRISNEELASRIDTTDEWIRSHGTGIGARHIAPDGVQTSDMAVSAAK  
SALEKAKISIEHIDYIIVATATPDYFGFPATACIVQDKLGAYGASAFDVTAGCTGFIYAL  
NIASSMLETSHGRNALVIGAEGLSRITDWNDRSTAVLFGDGAGAAVLSRIDETGRGCLSF  
ILGADGSGAKDLVLVQPERAKAFERQPLVPVISMNGKKVYDFAVKSITVVIERLLHKTA  
YRLEDFAWIIPHQANARIVQAAAKRFSIPMDKIFLNIEEYANTSAAIPLALSEMDEKGL  
LKPNDLIMLVGFGAGLTYGAAVIRW\*

>SPBIB\_v1\_50051|ID:27161962|ftsH| ATP-dependent zinc metalloprotease FtsH [Uncultured spirochete bib]  
MPSKGNKNSWSPNQNKPKDNQGDPNKKPGMPEGFKFRFSLGYVLIALIAVSFFNYFLFRS  
DNTVVPYSTFKDKIRTGEIKRVEIDINYTYGTDARSSEPASPLPATAKPGVVYKTVPV  
DPEFTALMDQKGVVYSASPREGSAILLLLLNWVLPFAIMFFLWRTVMSRFMGSNSNVLAF  
GQNRATVVAEGDIKTRFTDVAGVDEAKAELVEVVDLKNPQKYTEIGGKIPKGVLLVGPP  
GTGKTLARAVAGEANVPFFKMSGAEFVEMFVGVGAARVRDLFKQAREKAPCIIFIDEID  
ALGKSRMSGMIGGNDEREQTLNQLLVEMDGFSTSGLILVAATNRPDVLDPALLRPGFRD  
RQVLVDRPDMIGREEILKIHTKTIKMDPSVDLSKIARSTPGFVGADLANVVNEAALLAVR  
AGRKKVKEEDFQNAIEKVVAGLEKKNRMINPKEKQIVAVHETGHAITAFTPGADPVRKI  
SIVPRGFGALGYTLQMPLEDRYLVTKEELLGQIDVLLGGRAAEELVFHSISTGAANDIAR  
STDIARRMITDYGMSEKFRNVALTKRGGSSIPGMPQIADPYATKEYSEDTRQYIDEEIASI  
VDERYKHVQNLLIQKKDMLDRISALLLEKEVIEETEFAALTAELTSPSAAAASSKA\*

>SPBIB\_v1\_50052|ID:27161963|groS| 10 kDa chaperonin [Uncultured spirochete bib]  
MTVKPLGDRVLVKIKESETKTAGGIIPQTAQEKQTGTGVVAVGTDSVIVKVGDEVMY  
DKYAGTQIKIDGAEHLIVKMSDILAILE\*

>SPBIB\_v1\_50053|ID:27161964| putative PTS IIA-like nitrogen-regulatory protein PtsN [Uncultured spirochete bib]  
MDLKNLLKPELVSLDLKGNKEAIIRELVELAFRSGKVLKKEAIRSVFEREDRMSTGMK  
HGIAIPHGKTTAVRELVACIGISPEEIDFDALDRKGCRIFIMTLSPIDKTGPHLQFLAEV  
GMLFRSEEKRQALLAAKTPEEVVSILVGNNS\*

>SPBIB\_v1\_50054|ID:27161965| putative transporter [Uncultured spirochete bib]  
MLLGTMKLWLKYAFGIAMGAILYALPPSMVRGTAAITFISEISLKIGGYALVFMLASGI  
PVSFVRLSEAHRFWKIFSQSFLLVGLSIVAAGLGLAVALIFKSAPLPLITDSGLTPTID  
PAEMVVRSTFPFISFSTFAGSGTWLLPLLVFGFAFLAVAHDPVMARPLIPVLDVISRTAY  
LINTFISEILGILLIAVSLNLFVLRNTGLPVEYRGILFSAGVAAVVVLFVGFPLAYRIL  
GGKANPYVLLYGMLGPLLAAAGSGSIFSSGSAIRHLSESLGVKRDTNATIFPLALMTGR  
AGSAFVVASAFIAMFLYSRNGPGLAQLLLLLVLPFSVFVASAGIRSDISVMLSLVCML  
FGQGFQNGASLLVPVAFPLSILAAILDSAWMMFAVALIGDRQGERTTKRARNFI\*

>SPBIB\_v1\_50055|ID:27161966| protein of unknown function [Uncultured spirochete bib]  
MKDFYAEKRGKVYYIRFKDPLTGKILSARSSGQRNRDLAIKWAALYEKMKSQAGMPTGK  
FGDWANLFFKEGCPHITRLLNQGKSYAESTRRDNRRYVDMFLKDPISRMKLGEIGRDI  
IDLQDRIVKAYGRTRSAQRIYQAFHILNEAVIRGKLSANPSNGIAKISYQPKVRKPLTK  
AELDRFLDPKHWPNRTHWLMTMMARYTGLRAGEIRALYWEHLNPEEGSIMVLQNLPKNVS  
LEALRPPKWGKTRKAVYPKQLQVLEKERKPTGLVFQEKDGSVDYWLWHDSVKHARKAS  
NITHAGIHALRHSLDTILAENGINQEVKAIFGWTNAKTEQIYNHPEMYDVGKLSKKIQR  
VLKSGNSTNGELSKAGSD\*

>SPBIB\_v1\_50056|ID:27161967| conserved protein of unknown function [Uncultured spirochete bib]  
MNACIRFGTCSWNYPVSWVGLVYSEPQRRAAAYLREYSQKYDTVEIDSWFYKIPNPREVAD  
YLAQVPPSFRFTCKVPQELTLTHLRGKAGAAIGVVNPSFLSPELFEQFLEVIEPMLPKID  
AIMFEFEYLNRDKMPSLEAFLKKLDDFLAAMGERGKHLPLAIESRNKNYLTAAYFSFLRE

RHLPIFSEKLYLPHIYDLYRQYKDSIDTDVVIRLLGGDRTEIENKTNKQWNTIVEPKPD  
KEAIVTMARDITHRGHMVTINVNNHYEGSAPLTIKAMQKMLH\*  
>SPBIB\_v1\_50057|ID:27161968| conserved exported protein of unknown function [Uncultured spirochete bib]  
MKKLTVIGIVVALVFGGCTLFPTVTFDDAKGEWDFPDTTFNNSTITSIHLSVMGENQAAC  
RIDLSWNNFNFFYYGDGTMNGNVFTGEYNVGGNSSDTTYSITVTFSLSGSTLKAVFNGQ  
GPLNGLILEHG VKAAT\*  
>SPBIB\_v1\_50058|ID:27161969| exported protein of unknown function [Uncultured spirochete bib]  
MWKRRRLGCGFLFLFRLRQPSALPSDWRQLDTKDLLQEAAALAIERLQALNETLTQQAASE  
KQSKELAAQLETLTKEKEKLLNDIERLQAALATLQADWTESERMKALEHTLTSLQASLQ  
SCREEAKKTRRAGIVGLAVGVGVGMMIGIVSRR\*  
>SPBIB\_v1\_50059|ID:27161970| protein of unknown function [Uncultured spirochete bib]  
MKQPSIFQEQDGAFSMRRTLALLYALSSNGCLWLATLSGSMAGVWAGLAALVAVLILTGY  
TTIEGLKGLAAAIKGTCEGKED\*  
>SPBIB\_v1\_50060|ID:27161971| conserved protein of unknown function [Uncultured spirochete bib]  
MRQGIQTLFAELGEAGCLALCICELGKPGISEGEAVGLILEGIARGFILYDENDRQNPNN  
FFVQDRDGFMALVTGQKGWSSTKESGYPKPGERIIECWKWDETLAGNVVSHQHFRPLA  
WDPIKEARTVRYGQLESYRVFRKAA\*  
>SPBIB\_v1\_50061|ID:27161972| protein of unknown function [Uncultured spirochete bib]  
MQSIVDKLLDAAAGIAAAAITGTLWLNLRWLFSSKRSMEKVLSEVVGMRSIAVLYTLQG  
PILLGMKASLEALRDGTCNGNVDEALRLIAEKKKFFDEHLLSAITGDTEERAK\*  
>SPBIB\_v1\_50062|ID:27161973| putative Phage related protein [Uncultured spirochete bib]  
MTMNVPSLRILTNTLELVADLDRYAELYYTRSLSEPGDFAFSLPIEADSEGAVAEGNLLL  
IGNDGRRIGIIEEVERKALDKGSEWLIARGHEAKAIFARRIILPPAGAARIDMDAPAETV  
MKALVESQCGPSAETRRRFPALKIAADLGRGCRYLSSGYASLLSELCSIAKASGLGFSL  
SFDPGGQKLIFELIEGIDRSAGQKENPRALFASEYDTLSEARLIQGYGRHASILYVLGAK  
LAEGRPVALAFDGTPEGFGRFERTLDAPSFDTLERLFAYGQARLSAYPTTFFLEAVLPE  
GSSLVPDRDFALGDLCTVHAYGQWYTVPIHSIEEHWTKDGQIRLGFGRPSPGAFSASLH  
VTNELLEAFRAR\*  
>SPBIB\_v1\_50063|ID:27161974| protein of unknown function [Uncultured spirochete bib]  
MSEESGFFTSVAGDRKYTAQFMNEKLHEAMQRAEGVVRHADGELMVSTDGSLSDVAAGV  
ALKGGVYYKNPAGLHLALAAPTGLTQRWDRLAVRIDRMRRTMQAVVIQGSESDPVVPA  
NPSDDIPLAKVLVNRVEDPPVTVADEREFRPLFLTDRNSLDDLGEDEVYGRVLKEKAEA  
LNAGQAGLSFRQFGFVSRPWSAAQIECALLPLGSGTLFVGRSDTTKLSYSTDSGISWADV  
AGITIDNKIMSIVFTGSSYLAAGGSPARIFRGSPMGTWSKVFEDTTQEFVSALVVLSPQ  
ILAACGDKIYASTNGGSSWSQRGTLPGSYLMTAMANLGNVLLAAGFSTDKIWRSTDSGA  
TWTAVKTTDCYEKRPFGFIQVGNVLLGYNDGGLLYRSTDWGLTWDSGRQVAEGGLFTG  
ILADGEMLYLPQGKALYESADFGQSWSLKYPCANYDSIVALGKSDGNIITLGYQSHLYW  
GYPVAA\*  
>SPBIB\_v1\_50064|ID:27161975| putative Phage-related tail protein [Uncultured spirochete bib]  
VTLITYISAEDNELAIGTGRLTLLSAEGLDAPPVHLSIAKGGPGVDGAIAAHLQLEPRRIT  
LEALLDLEGLDEAGMAEERAGICTTMCPAKEGGSLRVTRGTRTRSIEAVPAAAPAFAKKR  
WNEAWQTFRLEFVCLKPSFKSTEPVISSVRYASLTFEGEIEFGEEGFECSSIEHSGE  
RTTTIVNDGTAPAPVRIRFTGPMVNPFFIRNRTTGEIIRITQMIRAGEYLEIDTEPGRRQI  
RLWKAGTEQNGMHYLDLASSFFQLAPGENIEELGDESAGEGSEAFFECYGHYLEA\*  
>SPBIB\_v1\_50065|ID:27161976| protein of unknown function [Uncultured spirochete bib]  
MSEESLQGANRRDDVEQILSVDEEELPGLLEEKRRREELSRQIAFGEG\*  
>SPBIB\_v1\_50066|ID:27161977| protein of unknown function [Uncultured spirochete bib]  
MSEGARIAALLDADEELSALLGPGTHILQGSALAAQPPYPLPLVLSANENIPLLENEDGV  
VAEGCRCTIGILAEGGLEALESRTKEVMEEAGYRCEMRKRLPAGRPEWHCCAMSFSGARL  
RI\*  
>SPBIB\_v1\_50067|ID:27161978| protein of unknown function [Uncultured spirochete bib]  
MKRRQIVKLFKRGLTLDGNFALSASWEDGGSFEASLWPARKTGQREGQRYLLVAKAGIGL  
EPYDRIETAQGLFRVLWVRIFPKHTEALVEKEVV\*  
>SPBIB\_v1\_50068|ID:27161979| conserved protein of unknown function [Uncultured spirochete bib]

MIIEDGTGLSGATSYIGLEEADGYHGERGNGRWTEAGEAEKSAALVRACDWLERAYGRLW  
DGTKRVATQRLSFPREEMDGVGEGEIPWWLKEAQCEAALELSEPGVLAFDASEGGGLQR  
EREGERFFAPGPGSVRKFPEIYRLVAGHLRSPAQVIGIGRA\*

>SPBIB\_v1\_50069|ID:27161980| protein of unknown function [Uncultured spirochete bib]  
MGRRAKGISVGPPAAGLAMAVHG\*

>SPBIB\_v1\_50070|ID:27161981| protein of unknown function [Uncultured spirochete bib]  
VAFDSEKAGILDRLSPDGQKALLGQELLRLGQEASLQALVALGAAVSGLETAVGSLEA  
ALARRQRFFARTGVLQAALAGTRVAILSESELGAGEKAYPLGFFLALGGEVAWSGGTGR  
LYLADSGTDLVYRFASVEARVLAAPGNFIGVGAEGVALEAEFGLGLGGRAGKGIDIVADGN  
FAEGSDLAVTVYGYIG\*

>SPBIB\_v1\_50071|ID:27161982| protein of unknown function [Uncultured spirochete bib]  
VAMGVGVGRAVALDVGKRAVTLLLG\*

>SPBIB\_v1\_50072|ID:27161983| P22 coat protein [Uncultured spirochete bib]  
MANLFTALAPILFSAAQEVS AEDTGALQAITLNFDDKQVAKDDIVAVPIASGGTPVDFVP  
GNVSPQGDSDTASTVDVTRITASKKRSWHLTGEQRRSLENAGTDKEWLRLKLMQEMRSLRN  
AAEADCVA AIVQGASRATGTAGTTPFSSSLDELIAVRRILKDNGCPMADAQFVCD SAAET  
NLLKLSAIQQA YAAGSDEERRSGVIK RQGF EIRTS AQITQH QKGTGTNYLT NATTPMAK  
GDTATTL SGASGSGTILEGDILSFE GPDNLYVSHAGISAAQQVLRIGRPGVRQAIGTSTP  
ISIGNSYTPCLGFDRGAVV GIMRPPVMPENPTMQQALISDMRGLTYLLEIAQY GQITWE  
LHLAWGFKVVMHEHVALLLG\*

>SPBIB\_v1\_50073|ID:27161984| protein of unknown function [Uncultured spirochete bib]  
MTSLNDIISHLKFELGKEGPLSKETILPLVEKIEPLAARDWARIKKLERKVEAFSGKSPE  
ELETSMKELETLKAELESTKLLGEKDELLKTLTKERAEKEAALAKSLSEEKAAVARLLL  
DAGLTAELSKANVKPSLLGAAKALIREKGILDVDGEGEVRTAVARIRRDGVEQTMSLADW  
VREFVASDEGKEFIAAKENAGSGAGEHRASASTASANSIPAERFWSLPAKDRSAFILKGG  
TVTED\*

>SPBIB\_v1\_50074|ID:27161985| protein of unknown function [Uncultured spirochete bib]  
LGSDPWGFTHCPCMIYYTLVGVRADRTTRTGGVTPARALLS\*

>SPBIB\_v1\_50075|ID:27161986| conserved protein of unknown function [Uncultured spirochete bib]  
MVDYLLHIYRKGS RPFQTLSDLP EAMALQIMEQLYIEGAVFWERFKEPRSYQSFRKQVEQ  
TMRAAFKNKGGKPKINKHPIYLIVGRPKWMDIVSDEKTLQTTEILRVPLSMIKRESVSFA Y  
PDSMVSALMAAEQNPDY YEPEYHGKVFTFDEIMDIIEKKGLPGEGWETRM PKHYAHYIEA  
QVWDRSILESIG\*

>SPBIB\_v1\_50076|ID:27161987| conserved protein of unknown function [Uncultured spirochete bib]  
MEQDIRGALPKSQGKRKRILILEDSEVDADLIIRILKKNLDFEFLRIENEA EFLRQMD  
AFAPDLILSDINLPGFSGFKALEIVKQAYPELPIFVSGMVGEDLAIKMFNEGAVDCINK  
SSLSRLPGSVVRALEDSSQKKRRLAELALEKNLRMTHEILIASIKALATAMEMRDPYTA  
GHQRRVADLAVQIAKRRGFSEDKIEGVSLAAAVHDIGKIYVPAEILMRPTRLTSAEYELI  
QVHSSAGYEILKDIEFPWPIAKAVYQHHERLDGSGCPRGLKNEEIIVEARIIMVADVVEA  
MASHRPYR PALGLAAALEIRK DAGTRFD PDIVEACASLFADGYQFPQRTS\*

>SPBIB\_v1\_50077|ID:27161988| Response regulator receiver protein [Uncultured spirochete bib]  
MLEHEQINLLLIEDNPDDADLALRALRKRHLLNTIKVLSDGEEAIHYLLRRGPYEGTELP  
SSIKLILLDLKLPKLN GFV LHAIRNDERTKRIPVVILTSSQEDPDIQKAYALGANSYVV  
KPVDFDNFSKCVSDLGMYWFLNKP PSHG\*

>SPBIB\_v1\_50078|ID:27161989| putative Histidine kinase [Uncultured spirochete bib]  
MKKEARMQDVAERYLSIAAEVILSLDAHGNITMLNESGHRLLG YAQGELIRKNWFDECVP  
VDVRNKLKTVFAKLMAGEGSDVSTYENQVITKSGETLDLLWHNTVLRDPDGHITGLSSA  
EDITQRKKMEEELRNSEEQYRMLFTGMDIGVFFFKPGGTISYANPAALDILGVTEEEITS  
LVPTDSRWKNIQEDGSEYPDDL PSTLAMHTGQAVRDKVIGIYNGREKRYRWVIGSAIPR  
FHTGEKAPSLVYVTMMDITERKMLEKEVAHMASFPAQNPSVLEVGTDGAVRFANA AVMA  
TLERLGLPPDARQFLPGTPEELALLRSQCEQSHQVRELRLGGATFLEIISAPEQHSLRVY  
ITDITEQKKA EELQKSLFLQVQEEKERLDLLIASMSDEVWFADTAGHFTLENPAACKAFG  
LEKPGDIDIQSFAQSLEVFRPDGSPRPVEEAPPLRALRGQTTIEQEEIVRLPKSGQLRYR  
LVTSNPVRDFEGNITGCISVVHDITDKKQAE LRIEREKAFFDHLIEMAPEGIAITDKTGI





VAGGAVSDLWDRNRHVIQAFQIPKGWYIDRSFDWGSSKPFSLGWWAESDGSPAILPNGQQ  
KTWPKGTLFRIA EWYGWNGKPNEGCKLEDTAIGKRMREMEVAMRETLGIEGVNAGPADGM  
IFEAQPGKPSIAQGI EDGYGRKDLFYPADKRPGSRIKRLAIFRRMLAASEHEPLEEPGIF  
FFDSCVYGAIRTIPTLPRDPRNPEDIDTRAEDHAWDDIGYRLTTVRPIAKSIQIEAA\*  
>SPBIB\_v1\_50087|ID:27161998| conserved protein of unknown function [Uncultured spirochete bib]  
MTNKGQFKKGVSGNPKGRPKTGEAITELFKEYLEGIDETTKLERKRLLEELYARAMGKK  
TISKRGKQIQLPGSDELLKYIVNRLDGMPKQAVDLEAFVDGEETLTVFIERPSGAPASRA  
DERREGTKDAEDQPA\*  
>SPBIB\_v1\_50088|ID:27161999| putative Tyrosine recombinase XerC [Uncultured spirochete bib]  
MTNEENKYQWYAAMLDEL RARKYSTSTRKRYLAICLQIAQAYPDRDLRSLKKGESFLA  
AMERGGASASTINQAISAATFLWRNVFELPFPIKVRPLKDRQLPTVITRYQVMQLIAAAN  
TSKTRLALALAYSAGLRVSEIASLQIGDINRE RGVHIRAGKGRKDRVVP LSQLVSDMLD  
KYLAQHPTKRWIFRGT TGGSHVNV RSLQNA MA AARAKAGLSSDVTMHTLRHSFATHLVER  
GENLVVVKELLGHSSLSTVQQYVHIAKTGILATKSPLDSPPLY\*  
>SPBIB\_v1\_50089|ID:27162000| protein of unknown function [Uncultured spirochete bib]  
MARRMRHGLDYFPLDTSWDL SMRLKAKYGLEGLGTVIQLMQMIYREGYYIEWSSETRQL  
FCAENQIDEPKLNAILFCLGHGLFNQDLFKQYSVLTSQAIQRQWIKICLYSKHKNLGD  
ARLNLCPENSDAYGQKREYLDSTSGKNAQNSESLRDNFNGDFPDNDGDFPDNCGKFPQNPR  
NMQEIGTEIKEKENKEKSTLAEFCAQPVENKREIQALIKALAQKKSAPNGPPASK\*  
>SPBIB\_v1\_50090|ID:27162001| protein of unknown function [Uncultured spirochete bib]  
MSAIDKCLCMVPEQEAFLQFHYPNIYELKALANKDRARGEKSLDIQKLLARIHDP  
ERLRQERTDAAILCHYRALLESDFCLWKMFRSGG\*  
>SPBIB\_v1\_50091|ID:27162002| protein of unknown function [Uncultured spirochete bib]  
MKILHTADLHARRESSREFFISYDSIRSAAMRHDVAMIAIAGDIWHGPVQNSAGSLFPDF  
IEAIRSLGDIAPVAMIYGTPSHDVEGSLEIFETQEC SHGIKILRPGTAYVLKKGKIEELN  
GGNEEEAELLISGIPEPSKRWIISAASEPGSRDADLAANEAFRMLCMATGCMRERYPRLP  
SLVLAHGQVEGATTGHGRMLGTGDGLHFTKDNL KSLKAEYIALGDIHQPHIEGTRAWYA  
GSA YPLDFGETHRAGCWIVDIHEPGKPV DVVRENFPHTNRHLISHASCAMEIPTMHNQK  
VWYEVQGTQELAPLDADIILSRLLAHGA AKGSKVTFDITDSDPVRASEIRTKKSLEEK  
STWAQVSGETL TESIEKARSLERETAARNAAAGNARYRIDRLILRGATGLWAKSRKDEI  
DLDLSSRGPVIALIGANGAGKTTILENLHPWPRLLTREGPLRDHFRLADSFRLDLYLTDE  
ATCKYRCLIRM RADIPSGTTEYWLFRDAGQGYVPLPGINGRLEPYQEWIERLFGSLALY  
QRTAFTAQNSKSCPDLSAATKGERKELFSEL CGIDWLEAYREAAKEKEDALSESLSKLE  
AKHSILAGSQARCAALQKEIEHAAYADEKSREEKEIVRKLEEAKDELAKIEKMNQERTR  
LIREREEARMRMLELTKKENECMGSIESLRASRLKPEMQSIINRAREIENRREALAAEK  
AAHDARQKQEMKDYLLAMTSYTTQRNDLVAAMNKIKVEIATLKERAH TIEERLAMPLGEN  
CPACGQKLPPEQLARQKELRIADEASLESYAKLIDMLASKKETE QKLQNLVLPSYPAQM  
EYPGTEELKSLSKFAAIDLVRAYDIVQRAEIAEGTIAHLRIELKKLEEEIGKVNRIDED  
SKAKLDRMPPKHEEEKLMEAI STLAEELTNTKLDIARAQTRREEAEKQLAEAKRNLEEYE  
RLGEQLKALTQEICEWALLGRATGKDG IQALELDALAPSISAIASRLLAASGNEGSIAIQ  
TLRLAGKGSRQHAIEDFEIMYISARGDEQEISTLSGGEAVVWRKAIYDAFELIRAQNTGI  
QFRTVILDEADGALDHESRLRYLRMIDAAHRESGRYQTIIVTHSLELQEMADMSIAIADL  
KPHADRQNAKDIAIPA\*  
>SPBIB\_v1\_50092|ID:27162003| protein of unknown function [Uncultured spirochete bib]  
MTKSQALEI IKRYPDAKNYIKQSHLEQLSPLVEVAIEAITCKKEDFHCLPGNTYMPRKET  
IDRFAMAAGISFNPLEESTRKENDCYIGRSQAMVMGPDGKYCYGDVCEYEYDVTIRHEEE  
MLIDRNSRTPRLHAGAKPVEDRARLAYLTLRKTARQ RANTGARSRAILSILGMQTGFKDL  
FPPDAPPTAEKTF LFSRIIVNTKNEMVLHRMLDSL TAPAKALYGS DARNLEAQPLHLALP  
EQPEPEEDPDPATDEHEEAIASIQESLDSGLLGPRATLAARDALLNHQSDDAYLADIAAR  
LKAAIENRKHTQQNNQ\*  
>SPBIB\_v1\_50093|ID:27162005| protein of unknown function [Uncultured spirochete bib]  
LLDVVLGVGVALDDLKRLAFGHFLSLLCYWQGMALGAVLFLQGRLLVLLFDPGVEVCDAEE  
DAGADAHVGD SA VTGFPVDVGF\*  
>SPBIB\_v1\_50094|ID:27162004| protein of unknown function [Uncultured spirochete bib]

MESKIPVNNPMPFRRERILISVNEAAQMLNLSKSYIYRETRNRTIPHVRIGSRILFRVT  
DLNAWIEQQNQPALQEQDCA\*

>SPBIB\_v1\_50095|ID:27162006| protein of unknown function [Uncultured spirochete bib]  
MKNSLLKRLALTILKIKIYGGYYYSLWHTHEYPIGEDKRGRRNRFLVAIAFFLCFQKKW  
\*

>SPBIB\_v1\_50096|ID:27162007| protein of unknown function [Uncultured spirochete bib]  
MDSNRYYLTTYGIDGNPLVEVDFSIIDQIKKSMNILAIIRTIIEQYDIVVGNYKELLKEI  
FEVTIDNNLYSPSDIIFLHEFSRKINIRLLNFLNSAKMYQDHLHASLLKIDNTKGRSYIQ  
RVGQLKKQNISICILEALRNHIQHYGIPTFTSEGTKRITRNTEDIIVHYLLIIIEVEYFK  
KDKKVRDTIPKEILSQNIELNSHIKEYFSYLSNEIEEVRQLFIEEYSSSTILIDRMIEMY  
SKVYPEIMEKWQKILCIIRNEENSVMVEFNRRNIDLIEKLRSRNKKGINLINRFFTDFTD  
LALNRL\*

>SPBIB\_v1\_50097|ID:27162008| TPR repeat-containing protein (fragment) [Uncultured spirochete bib]  
MKRKIRVFFASPSDLVDEHKIFGEAITQLNVGFGDGANVEFEPFGWEYSLASTGRRAQSV  
MNDKIDICDVFILALYRRWGDAPDASPYSSYTEEEFYRALDRWERTSAPEIFVFFKRVD  
AESEADPGPQLRKVLDFRKHLEETHQVLKYFDSQPQSFIDLVDCHLRAFAKDELPKPDKR  
RDVVILPMSILQQVEKAKEIALQKTEEAKKAKDAEQRHQLEALQLEIADDASQFSKEG  
KIEFAREKLTKLVTETTNLHILYLGFDFFYRTGDLDSAIVLKKWLSLSGDENKTEVTAM  
AFEMLGILYQTRGELDRAEMYQKALAIIEALGLKEGMAADYXX

>SPBIB\_v1\_60001|ID:27162009| Methyltransferase [Uncultured spirochete bib]  
MENYKSIYLTADFEIDDGTLKIVNDYLAKQPEPRPFVKPNSLGYVFYFHTLDVSLRRNI  
EALQSLDLFSGNGSNSSKAGEILRIIYDEVSKIGSYGVKSGKRQYVDFNLERKVQNRKD  
KEKNRSQYYYAQNNSFSETNNPLPENLTNKIICGDSLEILRVIPDNSIDLIFTSPYPNFG  
LEYDSQDDAHKWELYFEKLFADFECIRVLKFSGRIVVNIQPLFSDYIPSHHISNFFIN  
RRMIWKGEILWEKNNYNCKYTAWGSWKSPPNYLKYTWEFVEIFAKGTLKKSGBPQNA  
TPDEFKEWVVAKWSIAPERKMKFEFGHPAMFPEKLAERVIKLSFVGDVLDPFNGVGT  
TAVAQKLGRKFGIDISQEYCDVAQKRVKSMLL\*

>SPBIB\_v1\_60002|ID:27162010|ddeIR| Type-2 restriction enzyme DdeI [Uncultured spirochete bib]  
MPYNIGEIQKAYNILVGGIDDKANAENDEGSRAYGGVRSKAGILVEGIAKNLVEIAWNE  
LGGHPSRSLSFQKETIRIPLKPEYLKRVPAEVAEYIKAHIQQYFYGHKTDVHVSIDGQFV  
MGIECKAYTENAMLKRILVDFTLKQVVPNLKCVLLQLESQLTGDYSQPLKPIIYGSPSS  
HTLLSYFNVDLNIIVTLLEGERKVDEPIHKKPYFKPMTEQALIKAVETLKKLLSEFVVRK\*

>SPBIB\_v1\_60003|ID:27162011| Integrase domain protein (fragment) [Uncultured spirochete bib]  
VEQKNSQYVRQFVGYARYDTTEEFALREVYRVLCPNLFYFSTKLIKHXRENATIHKT  
YDTPQTPFSRVLASPFVSLTAKEQLSALKAGYDPVVLRYNLDTALDKLHHAHSNKT  
LIEVLYEKE\*

>SPBIB\_v1\_60004|ID:27162012| Integrase domain protein (fragment) [Uncultured spirochete bib]  
MGLSMKERHRVIAETAGRYRAASKKEKSRILNELTALTCYNRLYAMHLLTWWGKT  
VQRVIGGTRLKIVIGSPRVRKRRNGKKKYSEALYESLKRIVATFDCMCGKRLAVSIRE  
NLAFALHEEYAITDAVRAELAAISPATIDRLLAKEKQTXWXXKRHSTTSEANHYKTKI  
PIRTYYSSEEQRPGYLEIDTVFHSGVTVHDEFCCCTLDATDTMTGWVELRALPNRAQR  
WVKEALVDIKETLPFRLIAIDSDNGSEFLRQAGL\*

>SPBIB\_v1\_60005|ID:27162013| protein of unknown function [Uncultured spirochete bib]  
MDSVNRALDTIIVERFWRSLKYEDIYIKDYRTLAEKLGVSRYIRFYNSAHCL  
IENLSETIPMPHHKI\*

>SPBIB\_v1\_60006|ID:27162014| protein of unknown function [Uncultured spirochete bib]  
VALEALKGEKTLQELATIYAVHPNMIALWKKQLVERASMIFEKEGKDKEAEAAERTQ  
DELFRQIGQLQVENEFLKKLQTAVWERTEAIEPEHPELSIGRQCELLGVS  
RSTFYRPEEAIRYGVPGIFNTVKGVSSPLMRFSQSWKPMEYRSVWIV\*

>SPBIB\_v1\_60007|ID:27162015| conserved protein of unknown function [Uncultured spirochete bib]  
LNNEEVVGHTPSNRMNPEVDAAYLRDTKKWQEELAKLRTIVLDCHLTEELK  
WGVPCYMFQDRNIVLIHTFKDYCALLFFKGALLKDDKILIQQTGNVQAGRQIRFT  
NVREIVEMEPILKAYINEAIEAEKAGLKVPFKTAEFIPEEFQKKLDEIPAL  
KTAFDALTPGRQRAYILYFSA PKQSKTRALRVEKCIQQILNGKGLNEGE\*

>SPBIB\_v1\_60008|ID:27162016| AAA ATPase [Uncultured spirochete bib]  
MAAYNKYMFKREYEPLDQYLSPNKVLVIYGPRRVGKTTLLQNYLKQTPLKYKLDSDGNIR  
TQQLSSQDFAQILSYVEGYELLAIDEAQNIPNIGMGLKIIVDQIPGIKVIVTGSSSFEL  
TGQIGEPLTGRKTTLNLYAMAQSELLSVYNRFELREKLEDFLIFGTYPVQLQAPNQRTRI  
DILTEIANAYLLKDILALDRIKNSRTLLDLLKLLAFQIGSEVALTELATQLSVDVKTVKR  
YLDLLEKAFVIHRLNGFSRNLQRQEVNTKSKYYFLDNGIRNAVIAQFNSLDQRNDQOGLWE  
NFMLVERLKYRTYYSLYANMYFWRNYRQQEIDLIEHSGNLFQYEFKWSHNKAVRPPATW  
TENYPDATFTVIHPANYLEFILP\*

>SPBIB\_v1\_60009|ID:27162017| protein of unknown function [Uncultured spirochete bib]  
LNMYLLYAAMGYLSNAGNMADYFDVKY\*

>SPBIB\_v1\_60010|ID:27162018| Extracellular solute-binding protein family 1 [Uncultured spirochete bib]  
MKRIALAFMVLMAATAAFGAGKLTLMQNKPEIDAQIKAYAAEWGKKNNVTTVIKSIGGTS  
GGMGPQLKADYAAGDMPDIFAFDGLSEYKEWEGVILDLSKEPWVSKTSVAFKYNGKVYGF  
PVAVEGWGMAYNADLLAKAGIDPKTLTNYDAYKKAFEKLDKSMKKELGINSVVSMAASVEM  
GWVTAHNFNSLLSNGLPYGDLVVDNLLAGKVDMLQRLQEYADWVELLFKYADKTVLLTG  
NYDAQVGAFATGKAVFLHQGNWVDPNLKAANATFKMAFAPHGSMKKTDDGIFVAAPSFYA  
INKDSKNVALAKKFLNDLVTTPPEGHTYMKDAGMIPAFSGINLNPEGQLSKSVQQWSAAG  
KVYSWNQYYFSGDFRDKVLTPIYNQFAAGSITKAQFVDLMAKAFKDNAKK\*

>SPBIB\_v1\_60011|ID:27162019| amyD| putative starch degradation products transport system permease protein AmyD  
[Uncultured spirochete bib]  
MTKKTESSLVFWVFLAPVLFAFIMVMVIPFFLGSYYAFTNWSSARVDGGLRFVGLQNFA  
ESFRDPAFLYSFGITFAYTILNMIANVVAFALALLVTGELRLKNVYRVGFFVPLNIGGL  
ILGYIWQFIFNNAIPSLGRIIPVLGFLANPGNMLSKNTSALAAMIVVGTWQYAGYIMMI  
YVAAIENIPQELLEAAKIDGATPWIRLKSITIPLCAQAFVTMFLTLVNSFKQFDVNVSL  
TSGGPSTMLMGQPILGTELLALNIYNTAFISNKLSVAQARAFVFFVLAIIISIIQVYVVK  
KREIEL\*

>SPBIB\_v1\_60012|ID:27162020| ABC-type transporter, integral membrane subunit [Uncultured spirochete bib]  
MKQLRSRKPGMIVAEIVTALLFILFLFPFVLVLLNSAKTSFEVTQYPLAWPSRWGNIIDN  
VVKIWTSESVRYPSSLLTSTIVTVVSLVLINLFSAQAGWVLVRTKSRISIIFFIFVASM  
VIPFQIVMFPLLSWFRTVTVATGIRLLRTYQGIILAYIGFGAPLSIFMFHGFIKSIPLEL  
EEAATIDGCKKYQIFRYIIFPILTPIQATVVLNNGIWIWVNDYLLPLLVLGKGNNDIMTIPL  
AVSNFAGAFVKQWDLILTALMAMVPVHIFFLFAQKYIVKGMVAGAIK\*

>SPBIB\_v1\_60013|ID:27162021| putative integral membrane protein [Uncultured spirochete bib]  
MRPMKVLQPKHKIEHATPAFIFLSVIYATLLIISNITVVKLVKVGPFLLTAAFFTYPAVY  
VISDIMTEIYGYRLSMKAIWANFAAQALMSAVLAFATWLSGTDNAINDAMKTLFSSTWRI  
VIGSLAAWVGDWMNSAILSKMKVAQKQKWFLLRAMGSSLPAHFVDTTLFNIVAFGLVWT  
TGDIVRNALSESSLATVYELALFPVTFVLVVKLWKRIEGIDVFDEGISYAPF\*

>SPBIB\_v1\_60014|ID:27162022| exported protein of unknown function [Uncultured spirochete bib]  
MPGRLRRFFESLGPAAASSAISAKNAAAMGQYAAVYNQAASDAETCLAFFKKISPDEL  
EAEKSAHACMDQIRLLATTLNELDGLVASMPLRELEKDRAAIEAKKRTAPPALAADYDKS  
ISEIDAQRQAHQSLLEKESLEIKLHSMNSQFRQLSLDLASAHAVDAQTKLDSQHAALAT  
LSKRAEEIRASIEDLRTGSDDWLSMEIEKLSQNGA\*

>SPBIB\_v1\_60015|ID:27162023| protein of unknown function [Uncultured spirochete bib]  
MSGEEIRLCAIMHAEIAKPDALLALGKEEAGAAFAQFRETIRAAAEKSGRFLESSHGGGA  
VVAFDTSAAASALLIQQNLKPQIKAKIGINVDVLTSSGGAIGSAADIAEELVRVLP  
AGGICVSAAAWHASPSVDARTIHVQLELPSGKTLDAYRIETGENSLQKCPDA\*

>SPBIB\_v1\_60016|ID:27162024| putative enzyme [Uncultured spirochete bib]  
MLAETKYITSVPAKQCILWSTIVYRHFPDYKQVMLPINSLVMYKGRPAIVVAADLDRISI  
RTIDAEKRVPRPKDVAMAHTGPISRFPENRAPDEVMEALELLQTEHPEGIPLISWKDFAE  
LAWSDPKPEHIVIAWHELNNPAVETLDEGIRIRSEEEQHKIRDKLQKKKEAAEAKAFL  
VAFRAAWKKKDSSPIEGNSAFQPFLEELSRVARGLADDSPIARELGIKLAPQAVHEALLS  
SGYWNLANPWPENGCIMSEPEAPSALEERKELRIDRLDLRALPSYIDNAWSKDPDDA  
ISVEGENVWIHADPASIVGPFRLDAEAMERGSTLYLPEKIIPMLPDALVQKMGLGLSA  
ESKALSFRITLRGDGKIADISILPSMVAVQRLTYEQADTMLEDNPVLQKLSKIASVRAEL

RRRQNAVVIDFPEVAVHVVDGLPTFLPVPQTRSARIVQELMILAGEAAARWAFEKGIPIFP  
FATQDPPVSENLAGCGAGPSSSLAENFMRRRSMRAALVSSTCSAHAGLGLSFYSQVTSPL  
RRYQDLLAHYQIHAVLAAANKLDRNNAPSEPDLLISADTMNERLFRYSNQAAKNRQAERD  
SRAHWTLVYLSMNPDRGEGIVLDAEAETGQIFIPQFGYEFQTRIPRGIHVDSRVSLALR  
RVSVPDLFASFDILPQGT\*

>SPBIB\_v1\_60017|ID:27162025| conserved protein of unknown function [Uncultured spirochete bib]  
MTALLVGIGLIISVLMVLPGLVGGWVNDVLAFLRGAIPVFAVLIGALAVFIGIADIKDKI  
EEKKEEEKSKNAENEQETKEEKD\*

>SPBIB\_v1\_60018|ID:27162026|rpIM| 50S ribosomal subunit protein L13 [Uncultured spirochete bib]  
MKTVFVTAATAERKWIIDAAGKPLGRVAVKVASILRGKNKPTFTPSQETGDYVIVINAD  
KVAVTGRKRQNKMYHHHTGFPGLKDYSFDELIDRNPVSPMEIAIRGMLPKGPLGRKLFK  
NVKVYAGPNHPHAAQMPIAIDL\*

>SPBIB\_v1\_60019|ID:27162027|rpsI| 30S ribosomal subunit protein S9 [Uncultured spirochete bib]  
MRKGNEMVKNINLGIGTGRRKCAIARVFLREGTGKIINQKELKEYFPIEDLVAKVRKPF  
LVTDSENKFDAFITVVGPGPTGQAGACAHGLARALAQIDPANHVSLKSNGLLTRDPRMVE  
RKKYGQRGARRRFQFSKR\*

>SPBIB\_v1\_60020|ID:27162028| protein of unknown function [Uncultured spirochete bib]  
MALRIESVREKASGTLELALSGLLFHFSTDVRLCGMRFDSSSRMLITDDGSRLEFAPE  
AEVENEMLVSLRRLDQLHAARKVALGLVARAEQASIQLEYKLAKKGFTKETARIAVQWMC  
ENGYVDDRRYVRLLLQSHLVRGQGERLKAIAWPRIGLFENPRIIFAEAFSSIEEENLL  
EAMRRSTENLLKRGKIPAGYRRTILDDENAENPAAPLSRSRKLAFRLSWFRQEGFPNYAI  
DRFLESWEIENKDES\*

>SPBIB\_v1\_60021|ID:27162029| putative PTS IIA-like nitrogen-regulatory protein PtsN [Uncultured spirochete bib]  
MDDDILTIEEVAKYLRVSERTVYDWAQKGEIPSGKIGTVWRFKKSEIERWVNERLSSNRP  
VALISSVRIQNIISPDRILFLNYPKRDALMALAENLASAPQIKNKQELISEILRREELM  
STAIGKGIAPHVRLNSVTDLVVSIGISRCDIQDFQTLDDVPVRLFMIAAAYNQHAYYL  
QTLSSFFSARLKVVELRDGLLSCKSAQEAYDLLIRQDE\*

>SPBIB\_v1\_60022|ID:27162030|smc| Chromosome partition protein Smc [Uncultured spirochete bib]  
MASLRVLFILQERNDFVFLKSLEIFGFKSFADRVRIEFSPGISALLGPNCGCKSNIVDAI  
KWVVGESAKSLRAESMEDIIFNGTENRRPLSVAEVAITLANDGEVLPDVPDVEIEIKRRL  
YRSGENEYFINGKQARLKEVRELFWDGTGKSAYSVLEQGRIDQILSSKPEDRRYLFEEA  
AGITKHKVRAREAEQKLAKTEENMRQIESIVAEVKRSYENLKSQADKTIKYRLLKEKIFE  
TELDLYLVRLRQHVRERDRNSALFDQKKEREELVQRIERMSEAMSQGLDLVNELEAKLV  
EMQKLLYGLAVEKNGKEKQKILLAEVRELKAKIEQLEGRDRAIASKIESLRDEEKEA  
EYAGYRARVREVDANIHTFDENINAAALSVKANEETIRQNASAEIAQKTSQLRQELDA  
ITERIAELVDERLRQSESQIEARQNLEAQIHRAILEISASTAARAQRLEDLAKTLPAMNA  
QERAQQIDTISADLRALSLLSKSLEQDFTRYIAIAPTFLNELVAPEGVMTQKRRIDAAIL  
AHAVRLKEIEAENQALSSRNGDLSRKIETYRKTLEEARLEKAKIQAQMEAAQEALSVLRR  
EIAGQEA YRHEIASELAGEQKRQQLQEEIESLEELAEIEQGRRLSEEMAELEASISQ  
RTSDLAERRKESSELEQKMQALQELLENLHMAVAQSETEIRNLKDTFTELYSRDLSFES  
RMYEIRKPISEIREELTSIKATLAALGSVNLMAPEEFEEVKQRYDFLSGQYEDLVHARTD  
LVRLTDEIRTESAQLFIDTYNRIKKNFHNMFRLFGGGRALRLDTHVLESIEIYAQ  
PPGKKLENISLLSGGERSLTAIALLFATYMKPSPFCFLDEIDAALDEGNIIRFVNLLRE  
FGTASQFIVITHNKKT VAGADTLLGVTMEESGVTKAIAIRVQNDNGVVRPVYLPDEPFQE  
EEVEYEDGRQLDDQAKSANAPA\*

>SPBIB\_v1\_60023|ID:27162031| putative Threonyl/alanyl tRNA synthetase SAD [Uncultured spirochete bib]  
MNVHALSERLFYQNPWLQEADAVIKAEYAGPDVSADASAAKSGVETLRVLLDITVFYPE  
GGGQPPDTGFIDDLRVIDVQEIDGHIWHFVELPGNPSSPLKPHDPLKPGDRVHLRIDWQR  
RLDHMQHTGQHLLSAVLEQEYGIHTLSFHLGTEYSTIDVSAKNPEELPLPDIEAKIEDW  
IGHDVSVLVHYCPPEDIAAFKLRKKPPANEAVIRVVEIEGYDWSPCGGTHVERTGQLRAI  
KILSLERYKGNVRVYFAAGARAVRLLSATYEETKKTASALGVGIGGISARVFDILGKIAA  
LERALKQSTQTWAAAEAKLAASQAAPHEVLEFRLDEEGADSAEELAKAAAEELGRAAIAIS  
LSDKTIIQVPQVAGFLSLAGMLKPKLAIEFGGKGGGGPAFFRASFSSESELARFAEEAKQ  
ALAALSD\*

>SPBIB\_v1\_60024|ID:27162032| Thymidine kinase [Uncultured spirochete bib]  
MQPNDETGEFLKSLGFPQLNIHSMRHHDFESAGKRVLVIGPMGSGKTEFSARIWRDSRV  
ALKKKGAAAQLTSSGVVDRRDIFVVRSALDKSRFPDYPDDALAYRGGYERCGDRIGAAHD  
SFSLEMLIAENPQVGTWIIDEAAFFDERIAYLMKDEAESRGLSFILPTLVLNFRREIFNQ  
TARLLETATDIPLTAYCEHEECLKDSLTYTRYLIDGEECPALYFDPLIIIGDRTKH  
DGKEPNYCTRCDEHHYLPGKEYTFFTLKPFGELAARGNIAPLLAELNALVGNIEESRLYA  
SISSRCVEGPGREVQMNALRVPCIAERALVYLYAEQNLLSEEQMRYFIDELNLDREYLSQ  
RLADNRRPLAL\*

>SPBIB\_v1\_60025|ID:27162033| ABC-type transporter, periplasmic subunit [Uncultured spirochete bib]  
MNSRLALAVFAIAALLAPIGAQETEFVTVYGAQLPQLDPQRALFSNEAQIHTALYEGFLT  
YDPQTLEPVRALAQSWRSIDGKVYRFSIRENAQWSDGTAITAEDFVRSWLRMLDLNAEY  
ATFFDIIAGAREYRLGTDVADHVGKAIKIDPMTLEVTLVRPAAFYFTRLLCHQSFALIHPS  
MIGVKDWRAAIPYPVNGPYRPISTMTDSELVLEKNEKYWDAASVEIPTLRMMFTDDDNLAT  
SLFNTGHVHWLDGPGNYEQVLLQTAIQVFPIYSTHYWFFNCFAPWNDQVRRALALLP  
WDTIRSSDTYRLPAKTLVLPLPGYSKTKGIEKADKEEAKKLLADAGYPNGQGLPEIVIAF  
ADYKQPRAIATTFKTEWEKALDLHVTLPKMAPSSYYDSITNRADTTSFTLAHETWIGDFA  
DPEAFLQMWTGAPLNVAGYEDKEFMDYMNQSYAANDDTRMQLLSKAETELLQGAACLPI  
YHNFAASIIDAIEYVQGWYQNALDIHPYKYLHFGTPSVSPNVADANMPAKARPVSAALQ\*

>SPBIB\_v1\_60026|ID:27162034| GTP-binding protein [Uncultured spirochete bib]  
MGLEKAFVPERLVVGVLSDEAAENAALAEMIERYGQLCFHSAKELFLWTRYCPEMGDT  
ILRSYWAFEQLVDPMLAAIKRQTNAIELKLARNKRTVNLDPGMLGSARFCLATTKDHS  
HRIPLSDGIYAELTLMFEHGEFRALPWTPDWASQPVRQMLSELRTALLADLKRLTSALN  
LV\*

>SPBIB\_v1\_60027|ID:27162035| protein of unknown function [Uncultured spirochete bib]  
MGGGSSAFRPADTVGLXVVVPHKVGPEAQHAVCDIAVEADTLTMVVRQVLSELAIGVVR  
KEX

>SPBIB\_v1\_70001|ID:27162036| putative Histidine kinase [Uncultured spirochete bib]  
MTNLGSSVRKRSGRIFAVSAIALAVAALLCFFIAKNYNPAVGVITLAIFAIFLFAFTFRS  
IVSMYQMPLDAISQQADEIAKNLQSRTOEVAELTTKLQSIFDTTEEAIIVIRAPNELLSA  
NTSAYRLFGLSPGAGYTTESFFFSPAILGLIETCLKEGKASIEQFSMLKDKNEIILSAR  
AQRFAVSQSDAAVIVISDITSSKRTELTKKNFVANVSHEL RTPVQIVRGYAEMLNADIP  
EENKSWAEIILHQLRMERIVSDDLMLAKLEHDPASWIVRERFPIKPILEEAAQTVKLQY  
PEISRISIDCPDELEIEASPLIEQA AFNLISNAAQHSGSHDKIIVGAMQENEDFVLRVR  
DYGAGIPPKDLAHIFERFYRADKSRSSQSSGKSGSSGSSGLGLAIVKHIAFAHGGTVHAES  
WAGEGALFEFRIPARGSEYCSQPCVKT\*

>SPBIB\_v1\_70002|ID:27162037| Two component transcriptional regulator, winged helix family [Uncultured spirochete bib]  
MDTILLVEDDRDIAQMISTSLGRAGYRVIVMPDAEHAHAFLKDGAVSAILLDLMLPGMDG  
FAFIRKLKKNPALSAPVIITSAKDDDDTDVVAGLELGAEDYIVKPFSLKVLEARLRAVLR  
RSDASYINEGTSRRVQKSGILLDSARHEVRCQDIPVDLSATEFAILEVLLKNPGMVFSRD  
RMISEIRGGDVAVTERSIDVHILSIRKLGEGSLIETVRGVGYRFRDE\*

>SPBIB\_v1\_70003|ID:27162038| Phosphate-specific transport system accessory protein PhoU [Uncultured spirochete bib]  
MPREAFERSIEEINKRIISMGAASVEALQKAMHAFRERELDAAKKIKKADADIDAQQLQI  
EDLVATTMATQQPVATDLRLLCSIKMAAELERSADYAAHLAKATKFFAGEPQWRQTEMI  
EQMVQIGATMITGTVQAFISRSALQARQVALMDDQIDHIHKSNIKEMVMMLLGSRPEDA  
EAKVAKFIQVSGYLERLGDHMTNACESIIMVEGIHMELNL\*

>SPBIB\_v1\_70004|ID:27162039|pstB| phosphate transporter subunit ; ATP-binding component of ABC superfamily [Uncultured spirochete bib]  
MPEETKSPDSFIIETKDLSTITYGDGHEAVKHVSLGFPERNVTAIIGPSGCGKSTLLRALN  
RMNELIPNTRTSGEVIYRAQNIYNSSIDPVIIRRQIGMVFQKPNPFPKSVYQNIWA  
AAKVHGYAGDMDDLVEMSLRKAALWEEVKDKLKNALALSGGQQQLCIARAIALQPEVILMDE  
PTSALDPIASSYIEDLISELRKDYTIVIVTHNMQQAGRISDYAFMLMGDLVEVGPTRKL  
FISPSDERTERYLTGRFG\*

>SPBIB\_v1\_70005|ID:27162040|pyrD| Dihydroorotate dehydrogenase B (NAD(+)), catalytic subunit [Uncultured spirochete bib]

MKNPEQEQQSKKNEILAGPPPSVLNLGYDLNLSVRIGSLIMPNPVGVASGTFGYGEEYDEL  
VHIDALGALYTKAVTLEPREGNPPRLVETPMGLINSIGLANPGVEKFLREKLPSLRLRL  
CPIIVNVAGSTEDDYIQVIERIEAHLASTDSGRPGIDGYEINVSCP NVQKGGMSFGIDPR  
LVERLTHSLRQKTSRPLI IKLSPNVT DIAE IARAAEAGGADAISCINTV VGMVIDTEKKK  
PAIAMGTGGLSGPAIRPIGVAATYKVGKAVRIPVIGLGGITNASDAIQYLLAGALAVQVG  
TALFSDPRAPLKVLDGIIW MKRHSVHSVSDIRFMLR\*

>SPBIB\_v1\_70006|ID:27162041| putative Dihydroorotate dehydrogenase B (NAD(+)), electron transfer subunit [Uncultured spirochete bib]

MRQFNATVAINRAIAPDWMHMAFEWPSDLPAPKPGQFF TALPPVVELRAGTILRRPF AFA  
GFEEAQIEKDSSMLSRPAYAHSIYQVRGPGTRALASM QPGSSLDI IAPLGNAFPYPERGE  
RAIIAGGGIGIGPMLFLAEQLGAGTYASSAILVLGFRSALLIPFSGSFSAAGLPSWKLL  
EKAFFSTDDGSAGTPGTVRDALEALWLQASDLKGS GTKNLAQKKWHL YGCGPGPMLASLA  
QFAAQNHMHAHFSAEQWMACGVGACHGCVLPAASGGFLRVCADGPVFDARTINWEANVQ\*

>SPBIB\_v1\_70007|ID:27162042| conserved membrane protein of unknown function [Uncultured spirochete bib]

MLRMIQILVLLAFLFGGALAASIRLAPKPRVVEVSITAALWLLFSM GFRIGNNPELVHS  
IGTIGLLGFASAVFTIAGSCIAVVLVSHFAPAVG SVRKIGTAAQKENG FSAASSGPADSE  
FVVGASYSVLARLKPPAILLSVVVAGFIAGIALPRLAFDPGLITEWTLNALLFLIGMQFR  
QSQVPLASMLRSPAVVALPLATAVGSMAAGLLLVPFFSLRVGKALALASGFGWYSLSGVL  
ISNLGDPVLGSSAFLANMIRESLGLILIPVLGQTRVPTMAISVAGATSMDVSLPLIEQTL  
GPEAVPLSFISGAFLSALVPVLVPLFMKL\*

>SPBIB\_v1\_70008|ID:27162043| conserved protein of unknown function [Uncultured spirochete bib]

MNQDRVHEILEAIEPAPAPFTLVFSGRTNKKVNGLYKPAKAEIILHNRNFDS DNQLIYTA  
IHEYAHLIFVRHGGLPMRPHQTQEFWALFHELLEKAEQKGFYTSVFDSVPEFASLTMEI  
KNRCLAGNGSLLELGRLLVQAEELCRIHKARFEDYVERVLGLPKRTASTAIQAQTLNLD  
PSLGWDGLALVASIRDPEARSKAAEALSNGATPLIAKR VAMPPQDDSGDPVETLLAEHKK  
LERSIASMTERLQRIEDKLRTMGISEDEISS\*

>SPBIB\_v1\_70009|ID:27162044| transposase [Uncultured spirochete bib]

MFVQTLFEKKTGRTLLFYYTARRVKGKIVKTKVKRIGYLDEF LDAYPDPLTHFRQEAKRL  
TQEAQLKTLTVTFMDEHFSFGAGFAATEDAAVEKADRTFHYGVLPLLQLYRELKIDAF  
RIKAQYTKVDFNHNHLFQMLVFGRILFPESKLATWRDRTRILQHSDFSDDAVYRALPFFA  
QIKDALVQHLHEQVQRQYHRDTLLYYDVTNYYWEVDREDEL RKRGVSKHRPEPIVQLG  
LCMDNSGLPVTYGLFPGNTNDVATMRPMMQH LAESLGTKHLIYVADKGMGMGMNIAQIL  
EHNGYVISSSVRKADAELRRYILDHEGYTELAGGSFKYKSRLVPCTLYVDTPDGRKKQIR  
INERQVVFWSEDYWKARHDRDMAIAKAMARAGY GENTVLNNHAGNRFIKKEIFDPDTRK  
EVDHPEFSFALDQELLDSEEELDGYLIRS NVVGVREGDAPFNQPYRWHAKDNL FELNRP  
VVDLDIIDMYRGLWRIEESFKITKSQ LKARPAFVHRQDSIEAHFLSCFVALLLLRLEKR  
TGEKIPVATIVESLRKAQLVQLEDETYVNACCDNVIEAIGQALELDLTKKYYTKGELKAL  
RGKTAKS\*

>SPBIB\_v1\_80001|ID:27162045| conserved protein of unknown function [Uncultured spirochete bib]

VHWF AFCPNPCPYHYEAPASSWAYAIGWYATKAFGKVRRFRCTR CGKSFSTQTYSTHY  
LKRIVS YRDVLYXX

>SPBIB\_v1\_80002|ID:27162046| Uncharacterized glutaredoxin-like 8.6 kDa protein in rubredoxin operon [Uncultured spirochete bib]

MSVAIYTTPSCGYCRMAKDWFRQNGIPFTEYNVAADMRRAEEMVRKSGQMGPVIDVNGR  
IIVGFNKPEIERALHR\*

>SPBIB\_v1\_80003|ID:27162048| protein of unknown function [Uncultured spirochete bib]

MKNNIYKVVQRDIERQKMKQASNCLRLVNVGIKEYCLISAWVVAFTCGSGCLGLGGRISL  
SASTSSTRTYFQYELSPA FQIQAAIPLAIRNEVLTQSVFAESAFAAKGKIAGAEFAAGKL  
AINDAAGFLAKADAISNRGSSTLSVSSPGSVNDPWGLSVGAGKWALFAAKGPLYSDAAFQ  
YVLADRPGRLAVAAGFLMDAQQEIGTALRHASPWIAISAGYFHHSSILARIQMLPNFQS  
ARQIQADLDWAKGAAARLDFSRKGNSSVEGFAYAEAGDFISASGDVAA YDALIYSHYDA  
VFPGPSPIIKSVSLRAGIYSKQGAVSPKTGSLPAWGQYDPDLLRYWPKADINFKINTE

RRFNIFNSPGVLDSAFSAGISIEPSDWRARLQMDLHTRHAGKTYPQYGINLAIQGSFALP  
EDKANAASEPENAVENAEENAADGNFYEYPEQQGRAISYLDRFLGRMQISLSFLFEKFSS  
RLAVAIPMNAEESRTYSCKIQIGLKTEPLHLEGLTLEYNPEAMIISLPYARVFASFAL\*  
>SPBIB\_v1\_80004|ID:27162047| protein of unknown function [Uncultured spirochete bib]  
VRVLLVEALSEILPPRPRHPEPHVNATTHAEIKQYSLIPTFTRRKQLLACFIFWRSIS\*  
>SPBIB\_v1\_80005|ID:27162049|pncA| Pyrazinamidase/nicotinamidase [Uncultured spirochete bib]  
VESALIVVDIQNDFCPGGVLAVPDGDAAIIPAANSLAAYPISVLTQDWHPLNHCSFASAK  
SLPPFSLDTSAEPPNVLWPDHCVAGTKGADFPALQSWKARFIIRKGRKELDSYSAFFE  
NDGVTPTGLSGLSSLGIRVLCGLATDYCVKATALDARRVGFKVVIVEDAIKIDANP  
GDIDKAKTQMRDAGCVFAKTHELLAKI\*  
>SPBIB\_v1\_80006|ID:27162050| Nicotinate phosphoribosyltransferase [Uncultured spirochete bib]  
MNCLYQSALFTDFYELTMAQGYWKRRTMPVVFDFYFFRRHPFGGGYSVFAGLATLIEALE  
DFAFSREDLDYLATLGLFEKEFLEYLSSFRFKGTIYAAREGEIVFPQEPLLRVEADLITA  
QIVEGLVLNVLNFQSLIATKAARVWNASRRGAIMEFGLRRAQGADGALSASRAAFIGGAV  
GTSNTLAGKEYGIPVLGTMAHSWVMSYASELEAFNAYADIYPKNTVFLIDTYSNLESGIV  
NAIEAGKKLKEKGLSFGVRLDSGDIDYLSRMIRSRLDEAGLQDVKIVVSNELNEEIIESL  
VDDKAPIDVWVGVTNLVTGGDEAAFTGVYKLSAIDPEGEKRPVMKFSNDPEKSTNPGVKN  
LWRMYDEKGSARLDLISCSEEEIQEGTEYIVHPSADWRQLKIVPARIEPLLFKVMDHGV  
RVLDLPIKECQAFMKERIKSFDSTYLRLLNPHIYKVSITDRLYDLKVSLLINAFKQKLS  
KS\*  
>SPBIB\_v1\_80007|ID:27162051| conserved exported protein of unknown function [Uncultured spirochete bib]  
MSKNLSGTDMSHTAPRSRKLKICVFCGSSMGNSPVYADTAARLGRTIAGQGM TLVYGGG  
NVGLMGIVAESAMKTGGKVIGIIPERLFALVEQQELTELLVVKDMHERKALMQKKADAFI  
SLPGGIGTMEELFEVWSWRYIGYHQKPVALLNIEHYDQLLSLLRHMVNEGFLHKEIYDD  
LIVD TDM DRLIESLVAKIGKGA AVPFKKPERS\*  
>SPBIB\_v1\_80008|ID:27162052|aroE| Shikimate dehydrogenase [Uncultured spirochete bib]  
MPNRNYKAELGVFGYPVAENPTVMMEEA AFRALGLNWRYLTIEVKPDNLADAIRGLVAF  
GMRGINLTIPHKIEVMKYLDEIAGDARLIGAVNTVVAENGRRLRGENTDGKGFRLSLKEQG  
STRIAGSRVFLGAGGAARSAVELALAGAGHIVVANRTRTRGEDLVRTLNEATQCHADF  
LLWDRQLAIPEDTDILVNATSIGLFPDIEAVPDIDYRTIRPDLVVC DVIPNPPHTAFLKK  
AEARGAKTIDGLGMLVNQGVIGFKLWTGLEAPREVMMEALSKEFAG\*  
>SPBIB\_v1\_80009|ID:27162053| Carbohydrate kinase FGGY family protein [Uncultured spirochete bib]  
MQHYFLGIDNGGTVAKAALFDETGAEIAIASETVPFSA PKPGFAERDMLELWQANCR IIR  
EVLQKSRIPSKLIAGVACTGHGKGLYLWGKNERPAYPGIVSTDTRAWEYPLRWEKDGT AQ  
TVYAKTFQKILACQPVSLVAWLKDHASEVIERTKWVFEAKDYVRFMLTGEAYAEITDYSG  
SGLLNIRDRSFD SALLEAYGLGDLYDKLPPLVHSTDLCGKISASAAQATGLVEGTPVAGG  
MFDIDACAVASGVIDEQYFCVVAGTWSINEYLSRRPVT DGNIMMNSLFCMPEYYLIEESS  
PTSAGNYEWFNFFLDKEKNEAAEAGLSIFEFAERMARHIAPEDCDLVFLPFLFGSNYNP  
EARACFAGFSARHTRAHMIRAVLEGIVFSHKTHIDKLLATRTPPLAVRLTGGAARSREWV  
QMFADVIGLPVETVLASEPGALGCAMSA AVASGTYRDLREAAAHMVKLGSRFEPDSAKAG  
MYLK KYKLYKDIADSLDHSWKG FSPQTPSTELPS\*  
>SPBIB\_v1\_80010|ID:27162054|ulaE| L-ribulose-5-phosphate 3-epimerase UlaE [Uncultured spirochete bib]  
MKHESSRNQYSLGIYEKAMPSSLILSEKLLAAARHGYDFMELSIDESDEKLARLEASAQW  
KRELVNAAQDAGIRILTMCLSGHRKYPIGSADPKTRARGMEIMEGAILLAADLGIRIIQI  
AGYDAYYEPSTETTQALFAENLAKSVAFARYGVCLAFETMETPFMNTVEKALRFVRKID  
SPFLQIYPDVGNVTNAFEGDITRISQDILGGAGHLVAVHLKETQPGIFREIPYKKGHVNF  
DTCVEA AFSAGARIFTSEFWYQKGADWELDIGRAHAFLRKKLDRISSGE\*  
>SPBIB\_v1\_80011|ID:27162055| conserved protein of unknown function [Uncultured spirochete bib]  
MMHTAADVERIAYFGRNSVLLSNEKVRAIVDDLGGMMPEFSLKKGKGA VNAHWIPDFRGN  
SGLPWSSHEHGQYWKANILYILAGDFPCSPNFGPDCTVDGVGLPAHGWTANERWNLASSG  
AIQDGNAA YAKFTLESPDVRMPLSYTKYDVVQAGKPA YYSAMTIENHGDAPVSINLARHN  
TLGSPFLQAGCRIYVSAERCMTAPKGT EFD D TGR LAQGA EFDSLLKAPGRD GKPVDLSIV  
PGMIGY TDFVTGAIPAHKALGWSCV VNPVLKLA YVTF FPGPRGLPNDEIALGFNDLWMQY  
GGRNFTPWALHEGGADRTFCLGTENAVGAFANGLAYSRAHPELLGTPTMVTIPAKSARTL

NYGTALVELEDALAAEAITDIEAEGDMLVLKTARTYQRVSLDASFSGLRELVSRLK\*  
 >SPBIB\_v1\_80012|ID:27162056| conserved protein of unknown function [Uncultured spirochete bib]  
 MAHEKQLVEKALNEGNGVFRLEPAWVPRSFCIPGRRLKLHPNDYYAYGANRGGIDERWFA  
 STTKADNGPLTTPFEGLSFIWVDEKQHVLLKDAIELAGREILGDAVMKKHGGWRAYSKFF  
 DNQEPLPHHVHTDKMAANIGQMKGKPYFPKQLNNHGGWFPYTFGLNPGTTREQIKQ  
 CLADWEKKDNNILALSRAYLLQPGTGWDVPPGILHAPGSLTYEPQRASDVFAMFQNIWV  
 NSYTPKELLQKDIPEDKKDDLDYYVELLDWELNTDPLFYEHFRFMPPKPAKPLEDMRAEGY  
 EEHDIVYKSEYFSAKELTILPGRSALIKDKGPYGAIVIQGHGKFGSLDIESPAMIRFGQM  
 THDELFTERAAREGVLITNTSDTDDLVMLKHFGPEA\*

>SPBIB\_v1\_80013|ID:27162057| putative HTH-type transcriptional regulator DegA [Uncultured spirochete bib]  
 MPCLKDVARLAGVSTSTVSRAINGTIPVSEETRLRVEKAVRDMGYKPNLVAQSLRIKSTR  
 LLGLVVPQMHEFISFIRFTEEAEEAKGYNLIIGSTNSDPDREERFIENLIRRNIDGII  
 FSRVSDKSHVLKILDRTKIPVVIDRTLREDDIPSVMMDNYESGKLVAEHLSSLGHRAFA  
 CITGPLDIANRDLRAGFRDVLGGGTLEDKCIYEGNFKFESGKKGIAYLLDTGARFTA  
 LWAQNDYMAVGVNLLSDRGIAVPGEISVAGLDNIQSSWMMRPSLTTVAQPFREMCTHAV  
 DIIIDRAGREDDNREKIRVMLKPELIVRETTARPEGSFAAERKEVERK\*

>SPBIB\_v1\_80014|ID:27162058| rbsB| D-ribose-binding protein [Uncultured spirochete bib]  
 MKKVILVALVVIALVPVSVFAQKQIVIGMTVPGLQFPFFVTMKQEAEEAAAKLGVKINFI  
 DAQNASDKQMAAIETFISQKVDGILISPMTEDSLVAIEAAVKAGIPVATVDRKANTDKV  
 LIHVGADNVEGGRAAARFIEKLGKGTVIELEGTPGSSAAIDRKKGFDEVMKASNKIL  
 VSQTADFTRSKAQSVMENLMQVYPKFDAVFGANDEMIIGAIEAMLAAGIKPATKVTIGFD  
 ATTAFTYMKEGKLNATIDQFPGKQAAMALEALVNKIKNNVNPQKVVVISPLPVTK\*

>SPBIB\_v1\_80015|ID:27162059| rbsA| fused D-ribose transporter subunits of ABC superfamily: ATP-binding  
 components [Uncultured spirochete bib]  
 MDDIVLSMKGISKSFPQVQALKSVDFDLKKGEVHALVGENGAGKSTLMKILSGLYRADEG  
 EIWLKGGKITTRGIKAMINAGVSVIYQELNLRQLSVAENIFIGREPMLPGGFIDWKKMY  
 SDVHTLLKPFNVNINPRTKVYMLSPAQQVVEIAKALSLSKSDILVMDEPTAPLTGNEVDK  
 LFEIHNLLKSEVSIYISHRLEEIPKVAERVITLDRDGEKILTKPLAELTTAEIHKHMVG  
 RTLTEQYPKISIPIGEEVLRIEGLSKKGYCTDVSFSVRKGEIVGFTGLVGAGRTEIMQTI  
 YGRMKKDAGRIYIDGKEEHIRGVCDVVRKIGLPEERKHQGLVLGLSVQDNATMTILDK  
 ESVFGFLKQKLSALVGKMIETMNIKTPSARQLVRYLSGGNQQKVILAKWFLHNCKVYIF  
 DEPTRGIDVGAKVEIYKLMQNLAKDAGVVMVSELPEVLNMSDRIEVVFGGRIVKEFRR  
 DEADSETVMEYALGLRENASQQTPEAGAES\*

>SPBIB\_v1\_80016|ID:27162060| rbsC| D-ribose transporter subunit ; membrane component of ABC superfamily  
 [Uncultured spirochete bib]  
 MKVKFVETLKNYGIIAFAFIILVVLISFSPVFLTVNNINVIQTSIYGIMAVGMTFVIL  
 TGGIDLSVGSVLGVSGAICAGMLKAGNPILVIIATLGVGIACGFASGIFITKARITPFV  
 VTLGMMSIARGLTLIYTKGYPISGFSPAFRLIGGGYVLGLPIPIIFLVIVIIAYIVLTQ  
 TKLGRYTYAIGGNEETVRLSGINSNFYKTLVYVISGATAGFSALILTSRLNSAEPVAGTG  
 YELDVIAAVVIGGASLNGGRGSVWGTFIGSLLIGVINNGMNLGISPYPFQQVVKGLIIG  
 AVWLDQLRAKED\*

>SPBIB\_v1\_80017|ID:27162061| conserved protein of unknown function [Uncultured spirochete bib]  
 MKTEALWYLGERSIELRKMEIPEPKAHEVLVEMEICGMCSWDVLAFAAGKFGKFPYPPFAA  
 GHEGVGRVIKVGDNVASIKVGQRVACHEVPIGTPGGALMARHAIRTEDKATVIPENPIPL  
 KYWVVEPVVCIVNLVYAGIQPGDSVALVGAGYMGLIFAQGLAKTLAREVVAFDVDEKRL  
 SLAREFGVTRTVKIEGDAIPEDYRKHFVDIIETAGKPSSMQLALAVAKTGAIENFAWHH  
 HMHEFDLDAWHINAWRILNIQPGVNSHFSDFLQRTIDLMIAGTFSNEKLITHWAPVEQAK  
 EIFTTALERRDGYMKGAILFS\*

>SPBIB\_v1\_80018|ID:27162062| protein of unknown function [Uncultured spirochete bib]  
 MVLSIMGVHWFRPVRVCAAGGVATLLKVAKPLSANNGAFALAA\*

>SPBIB\_v1\_80019|ID:27162063| mnmA| tRNA-specific 2-thiouridylase MnmA [Uncultured spirochete bib]  
 MEAMEAMKAINTAIVAVGLSGGVDSLAAYLLKEQGYAVIGLTMKIWKGA YKIQEDLKHA  
 CFGPGEEDIAACERLCARLDIPYHVIDLSEEYERFVIEYFRKEYLVGRTPNPCICNRE  
 IKFGFLIERAHQAGLEFDYFATGHYVRKATIDGITYLKTARDAGKDQSYFLYGLDSERLS



HIMFPLGEMTKEQTRAAARTHGLEVAEKPE SQDFVGGGDYAPLFENDKPEAGDIVDIKGN  
VLGRHRGLPFYTIQRRGLGISIGTEPLYVLALDAKLN RVIVGHGKGLFSSGLISNSFRL  
QNPCDLGKSFACRVKIRQNHKPAPATV L VQSNGEARIEFEIPQRAVAPGQSAVLYSDDGL  
VLGGGIIDEAIPDEDIEE\*

>SPBIB\_v1\_80020|ID:27162064|gcdB| Glutaconyl-CoA decarboxylase subunit beta [Uncultured spirochete bib]  
MAAVEYIQSMQDVFIFGTSITWKMLVMY GIGGLLIWLAIKKQYEPMLLLPIGFGSILVNL  
PLAIAWEHEGVPGFLHILYDAGIANELFPLLIFIAVGAMIDFGPLFRNPLMIFFGAAAQF  
GIFATMIIATLLGFDLKTAA SIGIIGAADGPTAIYVANKFARDYLAPISVAAYSYMSLVP  
IIQPPVIRLLTTKQERGIHMALHEKPAPHWLRILFPIVVTMTAGIVAPISVPLVGSMLFG  
NLIRESGVLERLSQFAQNELAYLV TLLLGITIGGSMSAEKFLNWQTL LILAMGLVAFVFD  
TAGGVLFKAFVNLFLPHERKINPMIGACGISAFPMSARVIQKMANDEERGNIILMQAIGA  
NVSGQLGSIAGGLVLALVPLLVK\*

>SPBIB\_v1\_80021|ID:27162065| protein of unknown function [Uncultured spirochete bib]  
MENLIETLKNASPAVQAIGVSAGGLIGVFATIAFFVFLIVAADRFGKR\*

>SPBIB\_v1\_80022|ID:27162066| Beta-lactamase domain protein [Uncultured spirochete bib]  
MKVHSITPRIYAIHADIRSDDLFEGIWPIPYGVSLNSYLVKGEKIALIDLVRDWVVGAPGE  
LAGQLAAARTSLSDIDYLILNHLEPDHTGWLGEFLEINKKAILATAKGIELVNNFYFEH  
ERVRAVKNGETLDL GAGQVLQFFETPNVHWPETMMTWALDGGVLFSCDGFSGFGALGDRV  
FDDEFSAEEHEFFEAESLRYANIVASFGLFVKRAVDKLSNLQIKVVAPSHGIIWREHPE  
MIERYLRYADYLEGSREKEIAIVWGS MYGNTENGLQHVIEGIEEEQVPYTIHRVPNDNV  
SWVLADAYKSEGIVIAMPTYEYKMFPPMAYVLDIFERKHVWYRKALRIGSFGWVGAKKE  
YEAKIAQLK WDSLEPVWAGAPDEETAELLRERGRELARLVKGA\*

>SPBIB\_v1\_80023|ID:27162067| conserved exported protein of unknown function [Uncultured spirochete bib]  
MTKRFIAIAGIVLFLSMAVQFVSAQEGGTDLDSLFGEEVVPENPAGQTAQPDQTGQGGG  
AIAANPLQGLLKTEAVRIGGSITGTVGISGTWNDPWTKGFDITAPDAQQLSPALSSLVYF  
DARPDEEFRVYGSVKTA WPFSSKYSVLNSATLVNSTLSTTSTSTITVPDVSIFELFSDFQ  
LGDKAYFRFGKATVKWGVGYFFSPADIINLEQINLFDPTAQREGPLQFRVLM PFGPSQNT  
VSFYTIFDTSNPDFSTTALAGKAEFVLGRYELGVSGYYRDDTAERAALTLTGPLGKFDVF  
AEGVISRGS PKTFYSFSTSAPYYSTSASKDHR TTYPSATAGFLYNDQNNNITAI AQYYY  
NGEGYADSERSSSISALNALLSMPLPDATKTALTGLSKLFAYGSGRHYGAASISFSEIGG  
SDFSASLLGLANFSDLSGLVQPSVSWQVADRLKLTGSALFFFGASDTEYGILRPNNPMTL  
SLSLSAGTGNF\*

>SPBIB\_v1\_80024|ID:27162068| conserved exported protein of unknown function [Uncultured spirochete bib]  
MNVFFRKRNPKFVKAASLAVMMLAGLLAAVPTVFAQAKPDPVALLKELDQLSDFSGKDFS  
AVFTIVTQKPGEKDSVTQARIFRRDTKKQFLILILLPEVNKGQGYLREEDNVWFYDPTSR  
KFSSHSSVKENLQNTKAKNSDFTLSSFADDYA V TSMTEGTLGKFPVWILDLKAKTNEVSYE  
RVVLYIRKDR TMLLKREDYSVNGRLMRTTAYPKYIELDGKLLSTQILILDEINKGEKSQI  
TMAEQSVAPLPDKVFTKAFLEQVSR\*

>SPBIB\_v1\_80025|ID:27162069| putative ABC transporter, permease protein [Uncultured spirochete bib]  
MNMVLPRIAARNLLRQKKRTILLAGAIAFGIMIVTLINGFAGSFIQNVSENFAYLMGGHV  
FVSGSEYTPSGKRISVIRDDSVIMKALED SGQKWASIAKTSQATASLIFEGKSVSQNLTG  
IDITHSKMLKERLVLV KGSWEDASQPDAIIISQSVANKLNVLP GDKIVAQLQTVTGQNNV  
GEFRVA AISVDSSIIGSRMTYVQLEYLNNLIGL GKGEYMSLGIMLDRLDLS DGFATSLYT  
SMKGNIGIQLFDRNAKQESTSTPFQAMISEQNSETWSGTYR VYTIDDVLSQARQIVVAL  
DTASVAILIVLFAIVMIGISNTFRMSMYERIREIGTMRAVGVQRGEIRAMFLYEALFLAL  
AGAIAGIVLALVIMGILGLFSFDPQSAIFLILKRGHLSFYLPPLRAIGNIAIIAVLTLVA  
VYAPANAAK LAPAEALRTVK\*

>SPBIB\_v1\_80026|ID:27162070| conserved membrane protein of unknown function [Uncultured spirochete bib]  
MAVILRMAFRNIREHKS KSLIIGILLALGALILVVGTA FIDASQAGIRSTFSDVYTGDI  
ISGISSEGPVSLFGVSSPGGLAATPIIPNYEKVLSIVKSTPHIAGHSSLATGFAQLTRED  
STPQQANALKSTIQS QDRFLFLFGVDAASYWNLFNQVEIVQGERLQPGQPGLMISESRQ  
KFSDWLGKPLSIGDTLLIQGFSSAGMRLRELPIVGIFQLKEQGASPEQLAYIDIESLRVM  
SGMTVGANEP IQLKPEETSMLSTDNADSLFGEDVTVTQGSSTGIDVNAIAAQIAQESA  
AK PLQADEGAWQFIVAKADSPRN VQRTIAALNASFAKEGIPV VAGDWQKAAGPYGQSIDVVR

IVFAAIIILSIVAIIIIMNTFVISVIERTSEIGTMRAIGAGKGFVRGLFTAETALALV  
SSVVGAGLGIAVTSILRALHIEATNQFFLILFGGKYMNPVIVSAGNMITAIVVMVVVGFIA  
HLYPVSLALKIQPVRAMQEE\*

>SPBIB\_v1\_80027|ID:27162071| ABC transporter, ATP-binding protein [Uncultured spirochete bib]  
MQIIELRNAKKDYLLGKVTVPAIKGVSFAIERGDFVSIAGPSGSGKTTILNMIGLIDIPT  
SGEVIIDGKNTSGLSDQELTRFRHEVLGFIFQSFNLIPVLNVWENIEFPLLLGRTRVPKN  
EWKDWIDFLIGEVLGDWRDHKPNELSGGQRQRVAIARALVTKPSIVLADEPTANLDSAT  
GEQIIDLMKKINREIQTTFFIFSTHDATIVSIADHVIRLRDGTIENRRNGEDINGSGA VG  
APVED\*

>SPBIB\_v1\_80028|ID:27162072| putative enzyme [Uncultured spirochete bib]  
MQDFSKYLSANANNMKKSVIRELLKLTNQPDIIISFAGGLPAPETFPVEELREASDRVFRK  
YGDKILQYGTTEGDNDLKAQLVAYESAQGIKLGPENLLITSASQQALDMLPKLFLDPGDY  
VIAGRPTYVGAIQAIQSYQGNVGLGIPFSTADDGDFMVELEKRYERASAKKRIKIYIYVIP  
DFQNPSGICWSLEKRKALLEFAYREGLFIVEDAPYREIRFMGEPVPSIYQLDQQMQNRGI  
VINLKTFSKILAPGTRIGWIIAREDLIQKMVIKQAMDLCSTVLTQKMIAEFMATGKDKD  
IVARTCGIYRNKRNFMLEMFEKYMPCRFDLAWTKPEGGLFLWLSLPRYIDTDKMFYKAVE  
KKVAVVVGSAFYFDEPETNSMRINFSYSSFEQIEEGTKRLANVISEEIEAHEAGPRGQTS  
PEDI\*

>SPBIB\_v1\_80029|ID:27162073|ychF| putative GTP-binding protein [Uncultured spirochete bib]  
MPLNCGIVGLPNVVKSTIFSALTSAKAEAANYPFCTIDPNVGVPLPDKRLDRLCEIFKP  
RRKVPVAVVEFVDIAGLVRGASKGEGGLGNQFLSHIREVGMIAHVVRFCDDPDIHVAGKVD  
PADDIDVIHTELALADLDSIDRRLDKLNRQLKVQDPNLKDKTEKEIAVLQKVRPALQEGK  
PAFTVDLEPEEIEFARRSFLMTMKKELFVCNVDESQVHGNKYVDIVKEIAEKQGSEAVVI  
CGKFEAELADIEDPAERAFLAGIGLEAPGLASLAHAAYRLLGLRFTFTAGEDECRAWTI  
LAGDKAPAAAGVIHTDFEKGFIKAEVYHYDDLIQYGSEAAVRAAGKMRQEGREYVVQDGD  
IMFFKFNV\*

>SPBIB\_v1\_80030|ID:27162074| conserved protein of unknown function [Uncultured spirochete bib]  
MSEPLEKGEVVGQGSIEQGFSPAGDESAPRLALGSFSPSIRSKEKGEYYGHPRNHFWPIL  
AAFAMERGIVLPPGSLDNYSAKIALASSLGLLIWDMVQSCRRQTSADGELEIVALNDIRD  
LLGQYPSIKWVGLNGALAASLFMRHVSPENRLLARKALRMAGGRISIEIGQMRSIMYL  
PSTSPVPSRNRSTIDKQHIWFEFLGA\*

>SPBIB\_v1\_80031|ID:27162075|uvrA| ATPase and DNA damage recognition protein of nucleotide excision repair  
excinuclease UvrABC [Uncultured spirochete bib]  
MDKLIKGAAREHNLKNIDLELPRNKLIVISGLSGSKSSLAFDTIFAEGQRRYVESLSAY  
ARQFLGRMDKPDVDYIEGLSPAISIEQKTTTRNPRSTVGTVTEIYDYLRLLFARIGVPHC  
PSCGREIREQSVDQILDVILSWPSETKLQILAPVIRAQKGEHRKVLEDALKQGFLRARVD  
GQFIELEVPPALEKQKKHTIELVVDRI RLSEESRRRV AEA VETALGIADGIVTVIREGSG  
AQEGQLKEEFFSQQGACPVCGISLPEMEPRLFSFNAPQGACACAGLGMNMEFDPDLIIP  
DKLSLNFEGGCIPYNPTSAWNRSRFEALAHYHFSLDTPFESLPEKVMHAILYGSDEDIH  
VRYDNRDRTGHFEYQSKFPGILADLRRRYMESTSDEIKDWLESFMIEKECEVCHGKRLRP  
EALAVTIGGKNIYDITCMPVGEAVQFFESLKLTPTEAQISKLILKEIVARLGFLRNVGLD  
YLTLERKAATLSGGEAQRIRLATQIGSSLVGVLYILDEPSIGLHQQRDNQRLIDTLTYLRD  
LGNTLIVVEHDEQTLRTADYLDLGPAGEHGGYVVAQGTVPVIAHPDSLGTGQYLAGTL  
RIDVPKVRQNGAYITVKGASEHNLKHIDVKIPLGKFCITGVSGSGKSTLLSDVLYPA  
ISNRIMRSSHREGAFEAIHGLEHIDKIINIDQSPIGRTPRSNPATYVGVFTPIRELFASL  
PESRARGWKPGRFSFNKGGRCCEHCQGDGTIKIEMNFLPDVYITCEVCHGKRFNADTLDV  
RFKGNADVLNMTVEEASGFFAHIPSIAHRLKTMLDVGLGYIRLGQSALTLGGEAQRV  
KLSLELAKRATGRTLYFLDEPTTGLHFADVRQLLEVIHRLVDSGNTVVMIEHNLDIHKQA  
DWVIDLGPEGDRGGMIVAEGTPEDIARCKQSYTGQYLGPMLEISGPR\*

>SPBIB\_v1\_80032|ID:27162076| exported protein of unknown function [Uncultured spirochete bib]  
MRRILCIFGLLFIILFLPAQEAVNQSSPAEESTAQQTDTQSIPTAISASPVPEDFARKT  
LRFRIAAAATYELRDIAAEYGLSADGTADELRLRFAHFGEPIPKVKGDVSMTIEKAGN  
VQYFTIENGTKAIRVNGPLEIRFADSQGTIHRISAQYLVFNRDTNEVQAAGNVEYTRET  
TRTDIYKQSQIAVNLDDESSGVFVDGGSFNMEPTGAESRTLIVHFGTLISKSEEVVSLANGS

LTACDAIDPHYILRAKKIWLFGSGDWA VVNATLYVGSIPVLWLPFFYYPKASVFHPVVG  
FRSRQGGFVQTTTYVAGTQGAEARQSSAFSLQQGATGSFGTYVSRQTTEQSDTSSLAV  
LVDAYSSLGAFAGLRGKSASRLPVNLSWL VGVGLSRSVFLESTGYYSYDWAGNYKSVWN  
DWKFGSIALPVRVTSFEASSRRNASGLSWKVSLPFYSDPFIDQDFLDRKESYDFFSIFG  
GASSTVSERTSFVQKASLSWSWRAKNTQKPLTFNLSNLSSLSWKSXYASTSGMTAAQLR  
LNAVNPQRHFFYPENARVVDTTFSASGIIARSNAASLGWTTSNAMYIEDRFYSFAWQKPQ  
DIDFKSWYWLLGSRNNASLNSQLSVEKAALDFQFSSGVSGQVQYRPYLYDERVSPTTVHP  
FKLADYGYNTASWNAGTSIIWSPLRNIDMLAASKLQYSLSGKIAMVSYEGLDGGSGVNPANP  
VYKLNWLSWDDTMIRDHSILAELA KIGSTSERLSFKIALPPLENYTFSLSAAGIASF  
GAAYIISRQSSLADLKSTSLAGNVSLQPLKQLRFAANA AWFDFANAPLSVSADITAWSFN  
ARFTAQKANGYTFKSGSWIQDGTQYFRPSTVSLSWKPVLMKPPQDISDKLVWYFEFGSA  
LSLSQNLIQYTNAIFGSDFRISLKNSSGGLSLDLSVSSINKSFWRY YAGLLPVAGDLDPEI  
YKRNFFNDLLDSLSIWD SARLQRTLFLKQLSLTLAVDAHDWDLAGSIAAGPTLITPDTG  
RPYYQMDVSFSIAVTWKDISAIKSSINYSEGA FRE\*

>SPBIB\_v1\_80033|ID:27162077|ybeZ| putative enzyme with nucleoside triphosphate hydrolase domain [Uncultured spirochete bib]

LSPSHIVLEDTRLLAELCGANDYNLSVLSLLGARVLSRGNELFIESENDEVVGLFSQLV  
SAIGTSIEDGVPATPELIIALHAELTPEGKQPDDRGDQSAPEENESGISKFLDTCIQIPN  
GFGKVFPRSSGQSLYLQGIAMHDLVFAIGPAGTGKTYLAMAYALRELLAKTRRKLILTRP  
VVEAGESLGYLPGDLEQKINPYLRPLYDAMEALVPYETIRRLEESRAIEVAPLAYMRGRS  
LTNCIVILDEGQNTTKEQM KMFLTRLGDHTKAIVTGDITQIDLPKKNESGLVHAVTLEH  
IDEV FVSRLDARDVVRSP LVRKII EAYEKE\*

>SPBIB\_v1\_80034|ID:27162078| putative 7TM receptor with intracellular metal dependent phosphohydrolase [Uncultured spirochete bib]

MKKNNDELFFSSLLRQLASMAPSMWYFLAAIVIAAVGLVFLGPSALGSRNSLRSIQPGKV  
ADSDVYAGKDTVYVDKEATQRKILAEERLVLAVFVLDDKITS AVREKAEAFASYRQLAG  
EPGGVDALSLLRSRFPDLFQPELYTVLVRAKLNAQAFVYVSDIVESMLGKGVVSLPDGV  
FDQFNPNYYELVRTLGTRQESEQLPVNGMITLANLGNRLDDEMDARHVPESMKQYVRLLG  
KALLRENVFFDQGLSEKRIAAARARVEPVTRFVSRNEILVRKGELVTPELYQQIKTIRSA  
ILVSDVGVLMTGLGLLLVASLLGFLARVKDLSDFPSDRSSLLFLLSLLILLYWILVIQ  
NVIDSKSLSRGALFVPASLFAGLVSLLYGPRTGIFFSLISFFLTGAATNLNAQFMIGILL  
AGISATLTMRTARTRIMLARA AIFQAIQALLAIILLLNQKPNA AELIQSMGLGALNGFA  
GGSFILLLLPLFERLLDRATQFRLMELADINAPILKEMLSNAPGT YAHSIQVAHLAEAAA  
KDIGANPLLARIGAYYHDIGKIEHPEYFTENQKGVNRHDDINPSLSASIIRRHVKDGV  
GREIGLPKEVIEIIGQH HGNSVMEAIISKVKDSVSEADVQSFSYQGEHPKSKEAAIVMLA  
DTVEAASRSLKNPSSAKLEQFVHQLILHKLNTGQLEDSEL TMRDIRITEEAFSRILQSQM  
HTRIEYPGQEQ\*

>SPBIB\_v1\_80035|ID:27162079|ybeY| Endoribonuclease YbeY [Uncultured spirochete bib]  
MNGNEVFYSVIGTDEPAWAQRAANYALS VLDALKKQNWQISLTFCDATMQLNRD YRNI  
DAPTDVLSFTLGELEHVNDGEDVFIAGDVVISVPALYRNAEDFGVSADEELRRLIIHGIL  
HLSGMNHEDNEPDQPMHLQEQLLGGQSGNSIL\*

>SPBIB\_v1\_80036|ID:27162080| conserved protein of unknown function [Uncultured spirochete bib]  
MSLLSQIFKPRAKTELSSNESVEEQREMI EGVEHLPEKIVKDVMPRTD TVCVDNTTSID  
EILAILVESGHSRIPVYSDTIDNIVGILYAKDVLAALVKKEPELEKRLIRPPYFVPETKR  
IDSLLEKFKRRHVHIAIAVDEYGGTAGIVCLEDIIEEIVGEIQDEFDEETE QVIK VSENT  
WRCDARIRLEDLNEAIGAQLPIGEYDSL AGYVFDL FERIPATGEQVTAGDLQFTVEAMEG  
HRLTIVRIDRILVS\*

>SPBIB\_v1\_80037|ID:27162081|gdhA| glutamate dehydrogenase, NADP-specific [Uncultured spirochete bib]  
MNSYIKEVLDGLRARYPWESEFLQATEEVLESITPLIEAEPKYRQQKILERIVEPERVVM  
FRVPWVDDKGEYHVNRGYRVQFN SAIGPYKGGIRFHPKVTLSTLKFLAFEQIFKNSLTGL  
PMGGGKGGSDFDPNGKSDNEIMRFCQSFVTE LFRHIGPDTDVPAGDIGVGGREVG YMFGQ  
YKRLANQFSGVFTGKGLSFGGSLIRPEATGFGAVYFAEEM LKLRGETLEGKTVSVSGFGN  
VAWGACIKASQLGAKVV TISGPDGYVYDPDGVGTQEKWDYLEEMLIIDRNKVET YVKKFP  
KAVFYKGGKPWEQKVDIAMPCA IQNELNGEDAKMLIANGVKTVVEVSNMGCTPEAWKLF I

EKEIPFGPGKAANAGGVATSGLEMSQNSMRLAWSAEVDHRLHEIMTNIHKSCVETA AKY  
GFEGNYIVGANIAGFKKVADAMIAQGLV\*

>SPBIB\_v1\_80038|ID:27162082| RNA-directed DNA polymerase and maturase, group II intron origin (fragment) [Uncultured spirochete bib]  
VTRTEETNPETTKLIERLVERGTMREAYARVVGNGKAAGVDKMTVEALKPWLQAHWVEVK  
GRLLRGTYRPEVVVRGVEIPKPNGGKRQLGIPTVVDRFIQQALHQILSPIFEPEFSANSYG  
FRPGRGAHDAIRKAKEYQLAGKRWVVDIDLAKFFDEVNHDLLMARIKKVRDKKVLRLIR  
RYLQAGIMKDGVVWDRDKGTPQGGPLSPLLSNIMLDALDKELEKRGLSFCRYADDCNIYV  
GSERAGMRVMESITRFIEGTLKLVNREKSAVARPWERKYLGYSTNERKVRIQVSASSI  
ERFKEKVKALFRGAHGRNLGRFIRETINPFVRGWIQYYSLADTKQFAEELDGWLRRKLRC  
NLWRQWKRPWTRLKRLMERGLPEETA VRSAPL TSAARGGT LAPST\*

>SPBIB\_v1\_80039|ID:27162083| protein of unknown function [Uncultured spirochete bib]  
LDSVLQSRRYKAVCGRAGWMA PQETTVQPLAAVEETVDAPETADGAWLARRNGSPFRAF N  
QRGPWWNSGAQH MNYAFP KKYFDSMGLVSMIDRLCLSR\*

>SPBIB\_v1\_80040|ID:27162084|aroA| 3-phosphoshikimate 1-carboxyvinyltransferase [Uncultured spirochete bib]  
MENRIVYSSKVG GTIRAPASKSALQRAIACAVLAQGKSRIIGDPLCDDAQAALHIAEGLG  
ATVHVSDGAIEIEGSEQFLQEDGTGTT SLEQQEPLMLSCGESGLCMRMFAPVAALLDRPV  
QMEAEGSLRKRPMAMVESALHAFGADCAAQEGLPPLFVRGPLQPKLATLDAKGSSQLVTG  
LLISLPVLHG DSELGVENLVSAGYLDLTLEICSQFGVHIDKVS SDGRTARFLIKGNQSYR  
PASLRVEGDW SGA AFLAVAAAIAGKPEGLRIQGLKNDSLQPDRAIVDVLALAGARVQFDG  
SDVIVQPGDCLPFEFDATDCPDLFPPLAVLASVAKGISSIQGVHRLSVKESNRALALQDM  
LANIGIHSKIVDDALQISGGHFSGGRVESHNDHRIAMAAAIAGLAAANPVAIEGAECVAK  
SWPGFFEDLQSISSAPNLVPELK\*

>SPBIB\_v1\_90001|ID:27162085| putative membrane protein [Uncultured spirochete bib]  
MTGTKQDAKVSQKSAIKIGKKAFLLSAGIILV LMLVSGILTIVLPSGEYQRVIQDGKTLV  
VNGTYHEVPKPNYP AWRWLTAPVEILFAQDNVALITIIIFIFCVGGSISILEGAGIMEEL  
VKTLVQRFSKRKYLLIAVIIFFFMAISSFIGVYEGMVP MIIIFIVPLAIFLGWDSL TGLGL  
SLLPLAFGFASA VTNPFTIAVAQRIADLPLFSGSWLRIIFFIIVYGIVTTFMIRHAKKVE  
RNPASSLTFKEDEAIRASLAAGEAEAAHNTAAPNGGKHTDTASSRAKTKGLIWFASCVGA  
AMAIVLVTARMPGLSDLAFPVMALLFLIGGIGGLLAKVRPGNIGATFIRGAGNLLPGIV  
LILMAYSVKHIIISGKIMDTILHGAATLISQAPPLSAAFLVYL TTLVMNFFIGSASAKAF  
LMMPLLTPLADLVGITRQTAVLAFDFGDGFSNMIFPTNALLLIALSFTVVSYP RWMRWTW  
KLQAILVVT SIFLAI AVGIRFGPF\*

>SPBIB\_v1\_90002|ID:27162086| Prephenate dehydrogenase [Uncultured spirochete bib]  
MRIA ILGAGRMGAWL TEELCWHHDVMVHDTDLLKMKYFIKVHRALSIEEFAEFEP ELPFIN  
CVPLGYTLEAFDKTLPYLPKTCIISDIASVKTGFKEYYEQSGRAFVSSH PMFGPTLANIR  
DLHEESAIISSESSKEGA AFRNFYAGLKIRIFEYSFEEHDKTVAYS LATPFAS TMVFAA  
CMKKQDAPGTNFKRHL SIAKGLLED RLLTEIMFN PYTIRQLELINSKLAYLTHIIRQR  
DYEEMKKFLDSLRRNIGE\*

>SPBIB\_v1\_90003|ID:27162087| Prephenate dehydratase [Uncultured spirochete bib]  
MNLDDIRTDIDRVD AKILSLLNERMEKAILARRFKTSTLDTAREQAILDKVRRSSQCLLD  
PAFSVKMYEQIMAESRRIQEAGLQTVAFQGEHGAYSEVALRVLMPNAATIPCREFS DVFE  
GVEKGIYDYGIVPVENTLGGIVGPVNSILYITSLKIVAAIDMPIRHCLL TLPGADHRELR  
TVWSHTQALAQCRNFLYRNHLDPEPY YDTAGAAKALAESRPGIAAVASKFAADLYGLEI  
IKEDVQDTPHNRT RFFVISTKESDAEGDKCSAVFTAGNKAGSLFAVLRVFADEKINLTRI  
ESVPDTPGKYAIFIDFEGALLSAAVQKAISKVSALAE GFKILGCYKEMRVEE\*

>SPBIB\_v1\_90004|ID:27162088|aroC| Chorismate synthase [Uncultured spirochete bib]  
MNTGGTIFRVS LYGESHGPAVGVIIDGCPAGISLSENDFAADLGRRKSGAEGTTPRVESD  
APLLSGVFRGRTTGAPIHIEFRNENTQSEDYADFMHIPRPGHADYSAMMKYAGWHDPRG  
SGHFSGRITIGLVAAGVIAKKILAHCAPI SFDTRIIAAGGSEQIAETIRAAKEAGDSVGA  
LVEIRIAGVPAGWGEPFFDAAESVIAHFIFAVPAVRGIEFGDGFAAAAMK GSEHNDFPID  
QNGKTARNGAGGINGGITNGNELVIRVAVKPASSIAKQRTLD FSRNEPTELEIKGRHDA  
CIALRSVVLEAAAACALADLALVARARKSWESNIPWRKS\*

>SPBIB\_v1\_90005|ID:27162089| 3-dehydroquininate synthase (modular protein) [Uncultured spirochete bib]

MQTDRTILFGPFSSLM EIVPLDKAIFITSRALRQRAEALLASSNATHAAASLKDMPHAA  
QKESGLRWIEVPDGEPCCKTFPVLESVYHALLNLDANRDTVLVAIGGGSVSDLAGFVAHTW  
MRGIRLVLAPTTLLAMIDASIGGKNAIDVGYAKNIVGSFHMPHILCDVAWLHSLSPQDL  
ASGMAEAIKHALLDSEDHVEFLERIAMSGKALPELEAGAFKELVQRSQQVKLRVYVQADFL  
DAHARHVLNYGHTFGHAIELLTGLPHGFAVSAGMTAANRFAVQRGALSLAAAERIERLLA  
RFGLP TSMQA AFNLADRPIDKKALFELMRADKKRRSDIVDFVMPHAIGDLRIEEVTL PQL  
EAALEWLTKSASEDSTTRSAL\*

>SPBIB\_v1\_90006|ID:27162090|aroF| 3-deoxy-7-phosphoheptulonate synthase [Uncultured spirochete bib]  
VIKNIKLAARKPGQKTTIIDVNGIRVGEGLVIIAGPCSVETERQTIETAIKVKNAGAHML  
RGGAFKPRTPSYAFQQLGLKGLKILDKARKETGLPVVTEVVDTRDVSWSVGEYADV LQIGA  
RNMQNFSLLREAGKSGKPILLKRGMYSTLEEWLNCAEYILAEGNPNVILCERGIRTFETY  
TRNTLDLSMIPAVKRESHLPIIIDPSHG TGILSFIEPMSLAAVAAGANGLEIEVHIDPAS  
ALSDKDQQLTVPMFESLMNKLRLRAFMDPEMSSALQENMDTPAGKSAVQENNAQNAAP  
PLPGAFSEAVD\*

>SPBIB\_v1\_90007|ID:27162091| conserved protein of unknown function [Uncultured spirochete bib]  
MYFNELVSA YDRQRRE RNIYHDLMRDRVREVLLVGSLYDSFVVEDGVLTEQIYGEYFKL  
NLNTIPRVTCAYTEESALDLFREGRFDLVIIMASLD FDMPLRLAALMRSIWPDIPLLLMV  
TNNSSLAMLDMERPELSAFNRIFVWNGYSKLVGMIK YIEDWRNVEADTRACEVRVILLI  
EDSVRYYSRYLPVLYKVVLRQTQALVEEEHITETYKLMSIRARPKILLASTYEEALRIFE  
TYKPYLLTVITDIRFN R GACDENAGFDVRF AKQELPDL PVLVQSSEPNVREKAF AIGA  
SFIDKNSESELEMELASFLQTNLGFNGFIFRLPDGREITRARNMSEFVQKLNEIPESLLY  
HAEHNHFSAWLMARGEIHVAKILRPYKITDFSSPVQLRQFIVR MIDQIRSTRSRGMVPYF  
DPEMVEYQRYLCKIADG SVGGKGRGLIFIHSLLENLDFSQYIQGVRVSM PNTV FV GIDEF  
ERFLELNLG L WAWAYYGDSASEVRKVFVEKSLTLQLQDRLRQFLAVSTKPLAVRSSGLFED  
MLMVPFSGVYD TYILPNNHPDPEVRLKQLCDAIKLIYASLFSKEARAYFEAANYNLEER  
MAVVIQELV GSPHGGYFYPHAAGVAQSYNYYPVSYVKPEDGLCIAALGLGTYVVGGSAY  
RFCPKYPKLDV LSPDHALESTQRYFHALSLEDEAPDLLKGEMASLSELPVSAAEKDRYFP  
MLASTWDSADQRFVPGVQAKGSRVIDFANMLKYDAYPFAKAIEVVLDVASKSMGTPVEIE  
YAFNFDAGKEEPVLYLLQLKPLIHIEDRIEIDPASILPEVCFILSRNCMGNR DVSIRNI  
IWVDPRTFDRSETLEIAAEIDELDAIARQESFN YLLIGPGRWGTRDRWLGIPVSFSQISH  
AKAIVEADLPGFAVESSQGSFFFHNLTTMRIK YIKVTQSSADNFVDWEWLYQMPTRIRTK  
HCALTELEAPMDLRFDGRSGIGAVIKSAGLSNNGSSR\*

>SPBIB\_v1\_90008|ID:27162092|pheS| Phenylalanine--tRNA ligase alpha subunit [Uncultured spirochete bib]  
MIDQSAARALHPLEVKILLAFKVGDTIDSALVREKLG FREGDQQQAFSWLMAKGVLEEAD  
RQTEVFYELTPLGQEWLEKGTPIRRIFSLMKEIGPMSLPDIAQALGFDQKTVGS AFGSLS  
KEGVCAMDEARRAILTKSALPQLLDIEALLKAAAANAGSLPEKSLTQQQKALMAQIAKK  
RGAQDAPFRIAERAKVLFRLTSLAEDYRQAVTALGMTGEEFGAITPDMLEKGTWKLGTFR  
PYNVQIPPARVIPGRRNPYVEFLDSVKDKLVSLGFEEFDGNMVETEFWNSDALFMPQFHS  
ARDIHDVYYIDEPTHAKFIEPHLSRVAAAHENGGNTGSRGWQYQFDRDFTRRLILRSQG  
TVLSARQLPKAKVPGKYFGIVRCFRYDRVDATHLSDFYQTEGIVLGEDVNLRTLLGFLEM  
FAVEVAGAKEVKYVPGYFPFTEPSIEVHIKHPVLGWFE LGGSGIFRPEVTRSLGIDVPVL  
AWGIGIDRMALMALGLNDLRELFSPDLESVRMRRS QYKIQ\*

>SPBIB\_v1\_90009|ID:27162093|pheT| Phenylalanine--tRNA ligase beta subunit [Uncultured spirochete bib]  
MPKIEVNEELFFRLAGKTWS DKEAFEQDLTVAKAELDEWDTSLPADSERTIKIELNDTNR  
PDLWSTAGLARQLRIYRTNIPSYPFFASQKKKIAAPYRVVVERS VKEVRPWL A GFVAKG  
PAISDALLRDMIQTQEKLAWNFGRKRKGV SIGIYRISLIEWPVRYFGVDPHKVSFVPLQE  
TRRMTLNQILEEHPK GIEYASILK GKPIHPLLTDSKGRVLSY PPIINSADLGA VQVGDTE  
VFIEVTGSDYPSVALSSSIMACDLADMGF EIKNVQVDY EYDTPFGSSIVFPYFQGEISV  
SIEEANKLLGSLDVAQAIDALTRMGLCAYSEDGRTIRVAPPEYRNDFLHPVDIVEDIMI  
GHGLENFPPERPRDFTIGRLTPIERFSRKAKSIMVGLGYQEMIYNYLGS GKDYAEKMQIP  
ASALVKIANPMTENYEYVRNSPLPGLLQTESVSSKASYPHRTFEVGKVALKDVDANYGIV  
TRQYIGFLTSHAQADYNEIASHVAALMYFLGKEYTVREASDPRFV PGRQVEVLAGGKRAG  
VFGEVHPAVLEAFGIMMPCAASELDLDM LIEE\*

>SPBIB\_v1\_90010|ID:27162094| conserved protein of unknown function [Uncultured spirochete bib]

MEIYAHEPLGFDGFLVRVEADIRNGIPA VEIVGLASTSVREARERARIAVRNAGFEFPQD  
RILVNLSPADLPKEGSAYDFPIALKILSQSGQIADVPPVFLAMGELTLEGEIQPVRGILP  
AARAAVEKGIGTCIVPIENASEAMVVSSMQVWPISHLSQARQILIALREGEKPGMFLDGI  
LLGHGFGHDLQADSAPDSMPDASHMNYSPGAWHEHEQSLDFRDFKGDKEKFIKALVVAAGGH  
NMFLAGPPGAGKTMAANRFPSSLPLDLEATEALDTASLYSLWGQKQARFTKRPPFRAPHHS  
ASLEGILGGSKPLRPGEVSLAHHGVFLFLDECPEFRRDVLQALREPVERGYVDIVRAGRVI  
RFPSDFQLIMAANPCPCGNLGPVKTCCTPEEIRRYWKKLGGPLDRIDMRVAVVPPGP  
SRLLRASISHSDLQKKVLNARIQQRERLQRADARNARTNARIPPGHISELCKVTGNAEK  
LFLSGVSSYGFSARAGHSILKVARTIADLDGRQEIGESEIEEAIEYRQLGDGDAIWPG\*

>SPBIB\_v1\_90011|ID:27162095| Oxidoreductase domain protein [Uncultured spirochete bib]  
MNKKLRFGLIGYGKVAALHARALAAAPHCELVSVSUGHNKEKRDAFASQWKLASRDGVHEM  
VQKDGVEAVLITTPHPRHYFDAMDAFSAGCHVLVEKPLSLSVSEAEEMMRQAQATGRFLS  
VISQRRWYPACIRIREAIDQGLLGSPLLGQLTILGWRDEEYRSDPWRGSWEHEGGGVIV  
NQAPHQFDLLCWYMGEVAEYVGAWANVNHPYIEVDDSAVATVRFKSGGLSSVFISNSQKP  
GIYAKVHIHGSSGASAGVQTDGGAMFIAGRSVLEPPYNDLWTVPGQEALREQWHKEDKA  
FFAGIDATWYFFSLQEEDFARAILEGRTPAVSGRDGLQVARIIEGIYRSNKEGKPVRY\*

>SPBIB\_v1\_90012|ID:27162096| Alcohol dehydrogenase GroES domain protein [Uncultured spirochete bib]  
MKALVLEDYMRLEVRDIPQPTISAPDDVLIQIKAAAICGSDVHGIDGSTGRRRPPLVMGH  
EAAGVVAACGSGVAHFVPGDRVTFDSTVWCCECYFCRRGEVNLCDRRVLGVSCEEYKRD  
GTFAEYVVPERILYHLPNSVSFEEAALTEPISVAMHAFHITNMQPGERAAVVGTLIGL  
LLIQIIRAYSPHLILAFDTPDRRAAALQSGADIALDPADPLSTSMVLKATDGRGVDRAF  
EAVGASASIATAISVARKGGSVTLIGNISPKVEIPLQSVVTREISLLGSCAISGEYPASL  
ELIASRKINPRSVISAVAPLEEGPVWFERLYKREKRLKVVLP\*

>SPBIB\_v1\_90013|ID:27162097| PfkB domain protein [Uncultured spirochete bib]  
MSALQIMPAEKAELDFLSVGGVLRMDPGVVPFAFADRYDVHVSNGEYNVAANLARCFCGK  
QTAIASAMVDYPLGEKVEASVRSMGVRGIYKRFKYDGVVGNIALVWSDRGQGVVPPVVF  
YNRANEAALLKPGDFDFRSIFEKGVRFHSGGIFSALSATPELVIEGMKAARAHGSIV  
SFDLNYRAKLWAAADTGKKPSDILERVEHVDVLLGNEEDLQMGLGLPGPDIHSASKLDP  
ASFLGTIEQVHAKWPNVKVVATTLREVKSTNRHLWSAVLWIESQHWLAPTMELDVYDRVG  
GGDGFAAGLIYGMLEGLDPEECLRLGWALHAGALITTPGDTTMATLEQVKTAKGGSARIQ  
R\*

>SPBIB\_v1\_90014|ID:27162098|gnd| gluconate-6-phosphate dehydrogenase, decarboxylating [Uncultured spirochete bib]  
MKADIGLVGLAVMGENLVNLMESHGFTIAVYNRTVEKVDAFTSGRGAGKHHIIGAHSPKEL  
VAVLKKPRIVMIMVRAGSAVDDTIAQIAPLLEPGDIIVDGGNSNYQDTMRRLAELEGKGL  
LYVGTGVSGGEEGALNGPSLMPGGSEAAWPHIKPIFQIAIAAKVDDGSPCCDWVPGGAGH  
FVKMVHNGIEYGDMQLIAEVYHMMRDQLGMTPDEMADVFEAWNKGELDSYLVAITRDILR  
FKDEDGLPIVDKILDAAGQKGTGKWTGITALDFSVPVTLIVEAVFARCLSAMKDERVRAV  
KILGKPSGARFKGSRGAFIEDLGKALYAAKIISYAQGFMLLREAAAEYGWKLNYGSIALM  
WRGGCIIRSRLGRIKEAFDAEPSLSNLVFAPFFAAQVLENESALRNVVGEAVASGIPVP  
ALSSALEWFDGLRTERLPANLLQAQRDYFGAHTYERIDKPRGEFFHTNWTGHGGSTAAS  
YVV\*

>SPBIB\_v1\_90015|ID:27162099| Transcriptional regulator, RpiR family [Uncultured spirochete bib]  
MEKPKSSNCLYLIHSLMEDFSDRERRIADYILANPAKAVHPSIEELSESIGVSVSTLVRF  
VKKLGFKGYQQFRISLASEALAPEAKIYETIVDRNDPQIAFSSAQKALELTSSMIDRS  
ALAALASRIIEAGCVHLFGLGSAIVAKDAVHKLIRTGIHCVNAEDYHLQLMIASQLGEK  
DTAIVISHTGVNKDTRLIAEIAKNAGAFLCVITTYPRSPPLARMSDRLFISASSGSQMISE  
AFSARIAQLAMIDSLYIAIMEQLGECGIQKVEKMRAAIAKRRM\*

>SPBIB\_v1\_90016|ID:27162100| Extracellular solute-binding protein family 1 [Uncultured spirochete bib]  
MKSKLMLVILVVLTVLSVGAQQKEIRVLLANHPYGDLLKAAIPEYEKATGVKVNVESSLQE  
SQLTTKLTTEFATRSSTVDVFMTRPLQEAKMFYKNGWYEPLADYDFSDYPKNALDVATFG  
NKAYLVPLVTEWEVLYYRVDLFKKAGLSVPTNFTELEMAAKKLNSADIAGFASRGKGA  
VTQLSSYVYNYGGTYLDKKGKAVFNSKEALDAIRFYGKMLANYGPAGITNMSWENIMPLFQ  
AGKVAMWTDASVFGYQIVDPTKSQIPAENVGIANFPAGPKGNTPIYVVSWSGMAIAKQSKN

KALAADFIKWATSKELAKRGM LANITMARN SAWKDSEVRAKIH PGLIATQEYAAKNGIPY  
DRPYMSAVGEARDLIGEVIIESINTGGSSAKLESLARDKVAAVNSLLEDTGEYGVY\*

>SPBIB\_v1\_90017|ID:27162101| Permease component of ABC-type sugar transporter [Uncultured spirochete bib]

MAIKRPKGSFLEKNLHIFPLPAVVFVIVMMLFPVLYTLFLSFTNWNLTSGMPLSIVFLK  
SYQKVLREPRFIAALGRFSFTALAVAVETILGMIVALILNREFRKGFTKLIMLLPLVS  
TPVAIGIVNLFYDPTIGLANFVLRTRFGLPRQAWTGSAA TVIPSLAIVDIWQWTPMIALI  
LLSGLASLSSEPYESARVDGASEWQIFWRITLPMVTP TLLTALILRTIDALKTFDIYAM  
TGGGPGYASET LNVMFAKYSFEYFRMGQASVILVFLFMLVLFMSLLIVRMRKSLEL\*

>SPBIB\_v1\_90018|ID:27162102| Binding-protein-dependent transport systems inner membrane component  
[Uncultured spirochete bib]

MRTALIRKILFFLVILAIVVPVLPFLWMLTSSFKTQVDIVAWPPRLVFSPTLQNYERVF  
REQNFLKYFTNSSIIGISAVSLSLLMGLPAAYSIARYKQKRLSMFILARLMPGISFLMP  
WYIIFSRLLKLMDSYIALILSHMLITLPIIVWIMSSYFETIPIEMEE SAMVDGATRQRAFL  
SVVLP IAGPGIVTSVTLAFIFSWNNFMFSQVLSMERTRTLPIAIYNFVSYAEVDWGAVMA  
AAVAIMAPAILTMIFQKYVVKGLTMGAVKG\*

>SPBIB\_v1\_90019|ID:27162103|trpB| Tryptophan synthase beta chain 2 [Uncultured spirochete bib]

MRIKATLSDELPRQWYNLAADLPETPNPLAPDGSSLRPEQLSALFPEPLIEQEVSSDR  
WIDIPEEVLEILARWRPTPLVRARNLEKALGTPARIYKKNESLSPAGSHKPNTAVPQAYY  
NKITGTKRLTTETGAGQWGSALAFASAQFGLECQVFMVRSSYEKKPYRKVMMQW GASCT  
PSPSQLTRAGRAVLAEHSDSPGSLGIAISEAVEAALEDRTGKTHYALGSVLNHVMLHQTV  
IGLEAKRQLALFGEKAPDTIACVGGGSNFAGLSFPFVKDKIDGANIDIVPEPASCPSM  
TKGLFAYDYGD TAGMTPLLAMYTLGHDFMPSPSHAGGLRYHGMAPLVSHAARHGLLRPVS  
VPQLECFSAAVL FARTEGIIVAPETSHAVAQVIREAIQAREEQKEKVILFGLSGHGLLDL  
QGYEEYFAGELGDLSLSEEELARSLASLPKAGPAK\*

>SPBIB\_v1\_90020|ID:27162104| Cation diffusion facilitator family transporter [Uncultured spirochete bib]

MQESFRKLG YAEGIASAIINTILFGLKIWVGIKASSIAMTADAWHTLSDTLTSLVVILGF  
WISGRPKDEEHPFGHGRAEVIAAVVIATLLAVVGASFFRDSIRQLIERKNAAFSTLSLII  
FSISVLVKEALARFSLWAGKKTQSQSLVADGW HHRSDALASLMIVVGA VVGKYVWWIDGV  
LGIGVSALILYAA YDIAKSAFHALMGESAGAFLSGEIRRIAAETSPQLKDIHHIHVHRYG  
DHLEITLHARMNGETNIQDAHNLSSSLERELKKELNADTTVHIEPEKHA\*

>SPBIB\_v1\_90023|ID:27162107| putative DegT/DnrJ/EryC1/StrS aminotransferase family protein [Uncultured  
spirochete bib]

MIRVFSSYITRKDMDLVLSRMVEDAVGPGDFNSRFAKAIKDQFGFEYAVALRSPYTAMQR  
AFKICGLGQGSKVAISALAPSWHLAAVEDAGYVPIVLDVEEETLHPSKEAIESANPSTVL  
LFDALGKMPPSSLLQSLGFPVIEDISQVSGNIAESTSSNTFA YFAVWGLENDSP IATGGG  
ALLCARGKRDGQILRSMEE SLPSEL RMTDYNAA LGVSQLKSVSQMVERRKAIQEILSRQL  
ARTRHAGLKIAESEATPIYAFAVFAEGSSKEIIEYAKKHGVQAE LAFSSSPAIMGDDAAA  
CFPVARSIARCVLFPMHKLSNQQVDQIGKIVATLP\*

>SPBIB\_v1\_90024|ID:27162108|ppnK| putative inorganic polyphosphate/ATP-NAD kinase [Uncultured spirochete  
bib]

MQESKSALIFANLNKDDASNAALVIKKGLLERGWQADILGFRSSIGERPDFSRYALLVSL  
GGDGTLLYAASFAAPLGLPILPINLGT LGFIAANKIDTWAATFDGWCSGSIEVSKRLMLR  
VRAYRENELLYNGIALNDIVVSSEGNARMIRMCLYVNNDRFGHYRADGLIVSTPTGSTAY  
NLAAGGPAVHPEISAIINPICPFTLASRPLVIPGKLPVEIVIDETRKSGALLTVDGHDM  
TPLKKGDVAKIEKYEKHALLVPPGNAFFSALR TKLGWSGDNDA\*

>SPBIB\_v1\_90025|ID:27162109|recN| DNA repair protein RecN [Uncultured spirochete bib]

MLEQLSVQNFAIIEQVDIDL SHGMTVFSGETGAGKSLIVDALGFLLGAKADNSIIREGAA  
DCTVSGLFSIRDNPEVQRWLEERGISESESSILIRRTLKQNGRSLAWIQNRQVSRAELV  
EFTQFLVDIHGQHEHQRLIDPATHIEMLDAYASLDQDLKAYQKIYQEW RDSVKTYQSLLE  
EKAKRAQEMDYLEFVIKDIASAKPRAGEDIELAAEEKILSQHEKLF AAISEASSMAAGD  
STDALHLLKRARADLETARAIDARLGPFADRLAAAYYELEDISESIAEYRSGLRFD PARL  
EAIQNRLAELQRLKRKYGPELADVLRFRDRARSTLDTLAHADENALELEKRTKALKEKVL  
SAAAEISEKRMAAAAATLSSSMEAIVRRLGMPDARCIVRVARIVDDRGSYRPGPF GFDEVE  
FYIAPNPGEPDRPLSRIASGGELSRFALALKA VLA AHDVVDTLVFDEIDTGIGGQVGVAV

GEYLKQLSEYRQVLCVTHLATIAARADQQCKVMKYISEGRTSTEIRYLSDEREAEIARM  
LSGSAESDVSRSHAAELLSKAQIQQ\*

>SPBIB\_v1\_90026|ID:27162110|cdd| Cytidine deaminase [Uncultured spirochete bib]  
MQPEYSSLFDLAEACEHSYAPYSKFRVGAALLCEDGSVITGVNVENRSYGLTICAERNA  
IAAAITAGKKKFKALVIATPDADYPVSPCGACRQVISEFMPPSAPVVFGNSQNSYMTSSV  
GELLPHDALHELSELD\*

>SPBIB\_v1\_90027|ID:27162111| exported protein of unknown function [Uncultured spirochete bib]  
MHHRNEMKKRRFHIFAFIVAAVLFVLLSVRGTKKQEISEAIFLFPSSALDPASISRQNP  
SPSLISFLGDGYLYGIDSANNQLYAAQFSDRAAIDSSGWISYDRLATALQAFSLGSKPST  
IAGYGYPWFKSSRRFLIRADQMGAEMHADGSIVWEIEFPMPITAIDATPTTLGIGFLDG  
SIRFLGKKAENLYSEPHDSQQDSQHIRTVYGIALSGDGRSAAVLRGMSPQKIESYRRAGT  
GFVKSSERELPSGAPLQATMCYAEDGSHVIAQGEQLIYNTKKNYVRKLANGAALGNVA  
SGAFVQHFLVGLPTGGNTIAVLQVQSQNPTTKVLILKHGIIEREPEGAVSASAGK GALII  
VFRDGV EIVKGWQQ\*

>SPBIB\_v1\_90028|ID:27162112| exported protein of unknown function [Uncultured spirochete bib]  
MKSTKLIACFLFSVAFLGPLGAIDFQVPAATDIAGFGTILATQGSSNAKELQTKPGFV  
PRSDIALKTEYPEIKAPSSGTVIYSQRESPVASVFSFPLGGAVAILHPESYISLVSGLAL  
DTVIFNQAGRQENSVKKGTSMGQAIGSGIYPERYFGLRFLDLKNSLWINPLFLASWLQD  
RTAPVIQNVWLNENMRGNTPIELKTTAPKGYIECQQATYEVSVAAIDSIIPGSRFSFA  
PYKIVIMLDGKTSIDTSFIAATCKSEGLSFLGNPAPSSKAILENGAYRVGRIPLQRGQHE  
IEVQVSDYAGNQSILKASLMVN\*

>SPBIB\_v1\_90029|ID:27162113| Pyridoxal phosphate enzyme, YggS family [Uncultured spirochete bib]  
MPMNDSQIADNIARIQERILRAAERAGRAPQSIALMAVTKFHPAEAILDAYHAGIRLFG  
NRVQEAQTKYPPLRDSL VGSR LHMIGTLQKNKINKALGIFDALEGIDSVEVLEAILARLS  
SRTEPIELFFELHTGEESKAGFP SLD ELLRACDLLASFAAENREEGR LVVLRGLMTMAPF  
TDERAIRHSF SMLAAAKAEVAQR FDFVHFTELSMGMSNDFEIAIEEGSTLVRIGTALFG  
ERA\*

>SPBIB\_v1\_90030|ID:27162114| membrane protein of unknown function [Uncultured spirochete bib]  
MRWPLLRCIAFLVIVFFVGSFAFSAQDMQEVLPEDQTNPTQETIPQTEDTTGAF PQTEGG  
QAEQTQAKPPAVTLPSFSYKTTKESMAGRALILSIGVFPFSYFYTGFLVDVTRFVSNNFD  
TAYAPWPFKTQNSVALTNSEMWLKLGISAGLSIGFGILSAILK\*

>SPBIB\_v1\_90031|ID:27162115|apt| Adenine phosphoribosyltransferase [Uncultured spirochete bib]  
MANDSAIHEEDEGFNLDDAIRKVSDFPKPGILFYDITSILANPDAFQYCVDSMLKLYKDM  
EIDAVAAIESRGFVFAAPFCYKRGIPLLLVRKKGKLPGKTISCSYELEYGSAILEMHVED  
IQPGARFLIVDDLIATGGTINATCDMITRSGAVPVRAFSVVGLPFLNYGEKIKDIGVDTL  
IEYFGE\*

>SPBIB\_v1\_90032|ID:27162116|gpmI| putative 2,3-bisphosphoglycerate-independent phosphoglycerate mutase  
[Uncultured spirochete bib]

MVAALKKNPQWKGRRGPLVLVIMDGVGYGEYKEGDAVQAADMLHFRKLEASCPVTKLKAH  
GTA VGLP SDDDMGNSEVGHNAIGCGRVFAQGARLVNLSIETGAMFQGRVWRELVANVKNS  
RGALHFIGLFS DGNVHSHIEHLKAMLIQAQKEGVQRARIHILLDGRDVGSQSALDYVIPF  
EAFLAELRTKGV DYRIASGGGRQYITMDRYGANWKQVKRGWDCHVLGLGRRFSSAEAEIT  
TYRKEIPGVIDQDVPEFVIADEKGPVGTIEDGDSVIFNFNRGDRAIEITA AFEQDNFDKF  
DRVRRPKVYYAGMMQYDGLMVPKNYLVSPPAIDRTVGEYIAATGLKTLA ISETQKFGHV  
TYFFNGNRSGKFSDELEDYVEIKSDRVPFEQRPWMKCAEIADYVLD AIGSGKYSFIRLNF  
PNGDMVGHTGVFQAVVCGLEGMDLQIGRIKEAVEKAGGILILTADHGNSDDMF EHDKKTG  
KVTL DANGE PKVKTSHSLNPVPCVIYDPEYKGEYKAALRSGLGISSLAATCIELLYEPP  
ADYDPSVLEM\*

>SPBIB\_v1\_90033|ID:27162117| putative Adenylyl cyclase CyaB [Uncultured spirochete bib]  
MDQPDRAHMVEIELKARIADRKA VEAQLASFMRFAGDIDKRDEYWEVSGWNPLAPAAFRF  
RVRAEPARTTITFKEKTFDGDIEINRESEFSVDNEAVFRKFMEKLEARFVYTKRKIGTRW  
ESA EGLVAE VVEVEPLGLFLEVECVCEQLDSEALDEAKCRLYEVIDRCGIPRVNLEPRPY  
SQMLGY\*

>SPBIB\_v1\_90034|ID:27162118| exported protein of unknown function [Uncultured spirochete bib]



MIPFAKKLISSFKFRIFLFLVLAAIMPAFLLSFLQLHYERNRELSEMRYTTHQIVELIAQQ  
ESDVFQDTRQLEAIVAAMPEIRNAAYKEIAIYLRKLASAFHRYRNFLLDAKGTILANAF  
PADDAKTDDKIPALAEIAASKSPVMSGFHIDPDDHSPSVYFGYPLIDRSGYVSGALAAVI  
DLSYLNVEQAIRSKLQPEAVLTKIDREGIVLIREPDPEAYIGKKYQEQAVLMQIGTQQD  
GVLLQTDQGGQKSVFAFSRMPSKIYASDIYVIVSIPEHSFAFAGINQRFYRELLILGIGMI  
LISLLTMLS LDPFLMHDVQELIAAAKKMQKGLTARARHFKYSSIELQQLVRAFNTMADS  
MQKSQQQLLDSYEATLEGWVRILDIRDNETS GHSKRVTDLALQFAREAHVKEDEMPNIRR  
GALSRS AVQIRQRP\*

>SPBIB\_v1\_90035|ID:27162119| protein of unknown function [Uncultured spirochete bib]  
LKLEMSFFAKGIIIVSRASEPDYTICESNYKESLVSDYQIKPKGALNDSRRKKTEVLQMYD  
PYYKEGLGTPIDAPAFPRKCVRVSSCGTLQVKKRAGGTCAR\*

>SPBIB\_v1\_90036|ID:27162120| conserved protein of unknown function [Uncultured spirochete bib]  
VGLVYSEPPQRRAAAYLREYSRKYDTVEIDSWFYKISGPEEVADYLAQVPPAFRFTCKVPQ  
ELTLTHLRGNAGASMGVNPNSL\*

>SPBIB\_v1\_90037|ID:27162121| exported protein of unknown function [Uncultured spirochete bib]  
MRKAFFLILAVLLIFSSCNLINPVKKPSDIDTVAEINSSDIQSSGATNVPTTESEIVAI  
SGIGSNASSDQVIQDLGNSFAEKLSAAKILKAAKSLSSSFQQQIDKIQQDFDNFPTTKK  
IDETISLSGENIGTYFALTGTGEAAFSLNAVTTDGNPIDMQGASNLSSLAGEGTLKIAINP  
TSALSSLQADASAIKDFKFRNLNAGGSASISTKAGAGMERIPDKITLDYAESMAIAFSARV  
DTNGGKFSFKIDSKYSGTIDYSNIQSATDPEEVLNNTLVPSITITVKVYDDSGNVTFNKTY  
TSIEAFVAAFTPAT\*

>SPBIB\_v1\_90038|ID:27162122| exported protein of unknown function [Uncultured spirochete bib]  
MKKYALVALFAVAVFGMAFAATTQSGPASISGLAAEVFSLTVPGTYMGTIANGSTAETWN  
LGIITVNSNVRNWQLSVSSANSGLVNTADNTEKIAYTITVAYLDITDWSLSRVAVSPPQ  
PRTSKTGNIPVQLKFGPSADYYQAGTYGDTLTVTISHN\*

>SPBIB\_v1\_90039|ID:27162123| conserved protein of unknown function [Uncultured spirochete bib]  
MRTNIVIDSLMNKAKSISGYKTKKQTIIEALKLLIAQKEQSEIRKLRGKLNWEGNLEEM  
RLDR\*

>SPBIB\_v1\_90040|ID:27162124|vapC| Ribonuclease VapC [Uncultured spirochete bib]  
MIIVDTSVWIDYVRGIDTPQTDLLDYELLHDRVATGDLIIVEFLQGFREEKDIIKIAKQIM  
DRLEYYDFLGKEMAIISAENYRKLKRGHVTVRKIDVIIGTFCLEKGFELLHNDRDFDPM  
EQYLGLKVKR\*

>SPBIB\_v1\_90041|ID:27162125| protein of unknown function [Uncultured spirochete bib]  
LKDEKAPEQAPS NR MNPKVDAFLRNAKNWQEELAKLRTIVLDCGLTEGSIVITSNRPPED  
WFSIFPDQIVGGAIMDRLVSGAVKLIVTSGRSFRKEGTLRNQISEPAA\*

>SPBIB\_v1\_90042|ID:27162126| exported protein of unknown function [Uncultured spirochete bib]  
MITYKTKRIVSLLILTAIFLITFGCSEPIVYRTILLYLTSNYGLFSTGEKTD AKIYSISD  
GYITTLKPGDMANYTTYVGDRIIAIYSKKVNNTWVDVSKTMIVGEDSSVFYLD\*

>SPBIB\_v1\_90043|ID:27162127| transposase (fragment) [Uncultured spirochete bib]  
MYFKKDRAIHLVAGMTDMRKQINGLAQIANEKKADRMFSGDYFVFLGKTRKVMKVLYWDR  
TGFLWHKRLEEETYAAPVKVGLNFPVLV\*

>SPBIB\_v1\_90044|ID:27162128| protein of unknown function [Uncultured spirochete bib]  
MKYRKAERGSMKYPLELKQKVLKDYFEGKDGIRGLERTYGIQHQLILSWIKTCQQPSYRM  
RQKVPKEAALHLNEPPVFNDPRKELEYLRAENAYLREMLMLSGVRKNGRKKKALPPSND  
SAHEATP\*

>SPBIB\_v1\_90045|ID:27162129| transposase [Uncultured spirochete bib]  
VKLLCSIAQVSRSGYYRYLLITQKPNKDARLAEKVREVQEA VCYSYGAKRMAHVLSESEQ  
VPINHKRIARIMQKYL LGARILRRHPEYWYRQRHKVRLSDRQCAPNILNRDFLAPCPLK  
KLVTDTVWISCADGTYLSAVMDL FNRQIISYTL SRRNTTATALSPILELVGSYNLQGT  
VHSDRGPAYRSEYQALLRKHGIVTSYSRAGNCWDNALMECFHGMKCELGFVTGSQKKQ  
RVAQVSQKIHEYL VFYNKTRIQKNL GWVSPMGYKMLYTSSIESNNVST\*

>SPBIB\_v1\_90046|ID:27162130| protein of unknown function [Uncultured spirochete bib]  
MGLVQTKTGKLSPTVTVDRLAHHGHILLFEGENYCMKHALMRQKDQIKLPMA\*

>SPBIB\_v1\_90047|ID:27162131| protein of unknown function [Uncultured spirochete bib]

MPRRIAMIELREIILQLRRGCGIKHIRTGHHRTVIRALKAI AEAKDWLNPQKPPPDEA  
AVHAAWEATITSKKPHQLDGIQDQLLRSHHEGISFVVMHRLIAGQVSCSESTLRRYIQKM  
CPPTQ\*

>SPBIB\_v1\_90048|ID:27162132| transposase [Uncultured spirochete bib]  
VIDRLYIPGDCMDVDFWLLGLVDDEQDGRMRKAWVFSARLRSRKA YRTIVFSQHQDSFL  
ACHIEAFEWFGGVPATVVLNKLKAGIVKASWEDPLVTRAYHALAEQYGFTISACRPSTPK  
HKGGVENDMHYLRKRSFWPEIRAREAQKGHAVPRLAKVVAYLSEWNATVSEVRLVAKVGKT  
VTALFAEEKPYLQPLPSTRWEPERWAFATVQADWQIQFDKAFYSVPYRFIGQRLVQATR  
TTVRIFHESDEIAVHERAEHHWQHRVVVDHGGPPQAAEYLATSTKGLLMAAETIGPATGRF  
AKAIYADRAVDSIRPLWALVHLSERYPCDAIEQQAERLLAYGLASYTSLKNELKFAKEKA  
TRFSPSFRFARDPAYRDAAGVCHG\*

>SPBIB\_v1\_90049|ID:27162133| conserved protein of unknown function [Uncultured spirochete bib]  
MADLAVLKPKLTRLKLSGMLDSLQQRFD EAVAQKWSFSDFLEHLLQDEVERRDSKQLAYR  
LTKSGLDPHKT FESFDFSNPKICEPAIREIASCQFLNDKENVFFVGPSGVGKSHLAQAI  
GHEAVRRGHEVLFRRRTAPLFRWIAAGHGDGYSRRLKSVIAVPLLIFDDFGLQTLSD EQQ  
NDLYEVL CERYESASTIITSNRDFGEWPSVFSNPLMSSAAMDRLVHHAVK FVIEGKSYRV  
ESFSSRQRLTAGN\*

>SPBIB\_v1\_90050|ID:27162134| protein of unknown function [Uncultured spirochete bib]  
MNSSILFLSFIIIIIVFVILLLVKNRNRKKQYVIPSSNISHTREAEDLQLDPASSYSAS  
TKTIVKQDIPELIEIKNSPSPVDSQMIDESSINDNKT MENLVNPRLESSIYFTSIYFIRN  
DSQKTRKHTLEPIKRGGRPRDPNRDPKYL SLRQTLNYIAKPEIVCWEK GSEWKVGVEIPD  
EILANQDISILQNGIYLDRDSNIDNCWNLA AISGEIIIQWSNNEINN KIVITNENTYLIF  
RLVGEDQKRGYLVSNPSMGSYLIIAPEIWEYSNISTVNRIALPEPSSLVGYLAHFCEFKA  
DKENSVAFKTS ENKIITIKPVKPKFELVGN SLEDSS ENIGPLFGDSMPQIKAITKNTWND  
ISVIII GEEGRAKKRWRKEFIPDLSQNPQYIPDSFYEK GSGWYYVRIYNKENELVESMNF  
RYIELLKKINIPKHLHPAQNDGYQTAKIELIHSPGFVIKSANRRDNIQIEQESSEKTIK  
IPADPDYDNSHWLVEIDNNKFIPLTISLKRIWWALGEENKTPLEWIDKAILLQRSDFTAL  
SNKALWIRCPQDFKSKSISISMGENSRDRHYKISDSLAMIPIREFSDVTEMLQNNLEIF  
ASLPQDNIRIKICEVLRKLQCKFCDFTS LNEQDIIAHAIANHL DQMFIPLN YDELKANDP  
NLPHRIYQCIYCGFYVTSDDIENPTSKIIHHINNDCKKAPRNDGPPRTDFKIISNVDEIR  
ENIIAELPNIEKCYFCGKTFERATDNKKKTHLKECHMSLLYKLL\*

>SPBIB\_v1\_90051|ID:27162135| IstB domain protein ATP-binding protein [Uncultured spirochete bib]  
MRRPRTNRTLLREEISQLLKKMAFSQTA VQLCEE EGTAPMEQFLNLVLQSEMASREQARR  
ARFLREAAFPVYKTLEGDFDFTSVSLPPALS RDELLSMQFVAEKKNLV MYGPVGTGKTHLA  
TALGVEACNRSMRTKFFTAELVVRLSEAHKEGMLDKLLKAVLRADLLIIDEWGYVPVDH  
QGAQLLFRVIADSYEQRS LILTTNLEFSK WGSIFTDDQMAAAMIDRLAHHGHILLFEGES  
YRMKHALMRQKDQIKLPMA\*

>SPBIB\_v1\_90052|ID:27162136| Integrase catalytic region [Uncultured spirochete bib]  
MNQIDQIKELQRQGYGPGEIASRLRIDRKT VRTYMKREDFNESLEAHTTWPSKLD RWKPL  
IDEWLAEDQRMRFKQRHTAKRIHQRLC GEHAGEYDCSYPLVQR YVKAKKVAQRQMDGFLE  
LVWAPGEAQADFGAEVMEAGVRKTIKYL TLSFPYSNAGFTQVFEGETAECVAQGLQDIF  
GYLGGVPRRIVFDNATGVGRKIQQHVALNQLFLRFKCHYGFVSFCNP NAGHEKGNVENK  
IGYTRRNFFVPLPVVDRLVDLNMQLFKKALQDHARKHYKKGQTIAALFAEEQTALSPLPA  
RPFNVERYERLRTDGYGKFCLDGKHWYSSAPEYASGEVTVGIKAREIVVYGP DGEVRGEH  
RRIYGEERSDSIDWHTSIAALMHKPSAWQNSHFRAATSPSVRQALDALPRDRLRDVLKGL  
VQSSERFGFEVALASLEEAVSVARLDSYSVHAVAARHVYDGLYGIPAAGPDLGVYDRAFI  
GEKEHTP\*

>SPBIB\_v1\_90053|ID:27162137| protein of unknown function [Uncultured spirochete bib]  
VLADIPLPDEILYGKSYMALMDRIQ\*

>SPBIB\_v1\_90054|ID:27162138| protein of unknown function [Uncultured spirochete bib]  
VLA YDGSSMKRIDAAGILGMAMSGTTATLLARRWESALLVNVDNDTLRRLMSNEEAMRAL  
MGIVSVNFTPLGKNRKRKFHTV GQKSV\*

>SPBIB\_v1\_90055|ID:27162139| transposase [Uncultured spirochete bib]  
METALSELPDDVESLKKLVVEKARRAHELEATSKQLKEENAALQLKLEVTDKYETLQQK

FFGSSSEKRRKKEDDNPQALLFNEAETYAEAPPKPEKSIPVKSHERKVRGRKPLPANLER  
REFVYELSEAERTCPCSGAVRPEIGQEVREELEFIPARFVVNAHILKKYGPCQCASCSDP  
IVQAEKPAKLIPGSSFSNTTIAFFLTSKFVDSQPFYRMEGILSRWGIDTSRASLCKVAVS  
AGRAIGELLDELRKDLAASPVLQMDVTVVQVLHEKNRSAQAKSYMWVARGYAEGKPVVFF  
HYHPSRAKEIVQKFLHGYHGFVQTDGYAGYNEVGFSPGITHVGCLAHVRRKFFAEQQGS  
TEASAFLERIAELYHAEKLVRRKFEEGVLTTEEFLAARTKEQGPRLSEMKAWLIKQGGQ  
PPSLSFGKAVHYALGQWDRIEKYLQHELLTPDNNAVENAIRPFVIGRKNWLFSTPLGAH  
ASAGIYSMIETAKANGHEPYKYLCYLFNALPKARSLEEKRALLPYKLAPNSY\*  
>SPBIB\_v1\_90056|ID:27162140| conserved protein of unknown function [Uncultured spirochete bib]  
MYFKKDRAIHLVAGVTDMRKQINGLAQIANEKKSDRVFSGDYFIFLGKTHKVMKVLYWDR  
TGFCLWVKRLEEETFPWTRKQKGIITLKREKLKLLKIDIFREHTEKRYVSVL\*  
>SPBIB\_v1\_90057|ID:27162141| transposase [Uncultured spirochete bib]  
METALSELPDDVESLKKLVVEKARRAHELEATSKQLKEENAALQLKLEVTDKYETLQQK  
FFGSSSEKRRKKEDDNPQALLFNEAETYAEAPPKPEKSIPVKSHERKVRGRKPLPANLER  
REFVYELSEAERTCPCSGAVRPEIGQEVREELEFIPARFVVNAHILKKYGPCQCASCSDP  
IVQAEKPAKLIPGSSFSNTTIAFFLTSKFVDSQPFYRMEGILSRWGIDTSRASLCKVAVS  
AGRAIGELLDELRKDLAASPVLQMDVTVVQVLHEKNRSAQAKSYMWVARGYAEGKPVVFF  
HYHPSRAKEIVQKFLHGYHGFVQTDGYAGYNEVGFSPGITHVGCLAHVRRKFFAEQQGS  
TEASAFLERIAELYHAEKLVRRKFEEGVLTTEEFLAARTKEQGPRLSEMKAWLIKQGGQ  
PPSLSFGKAVHYALGQWDRIEKYLQHELLTPDNNAVENAIRPFVIGRKNWLFSTPLGAH  
ASAGIYSMIETAKANGHEPYKYLCYLFNALPKARSLEEKRALLPYKLAPNSY\*  
>SPBIB\_v1\_90058|ID:27162142| conserved protein of unknown function [Uncultured spirochete bib]  
MYFKKDRAIHLVAGVTDMRKQINGLAQIANEKKSDRVFSGDYFIFLGKTHKVMKVLYWDR  
TGFCLWVKRLEEETFPWTRKQKGIITLKREKLKLLKIDIFREHTEKRYVSVL\*  
>SPBIB\_v1\_90059|ID:27162143| protein of unknown function [Uncultured spirochete bib]  
LRLGIEGFRSLNQDIETIINKFEAVKCLKREANDRQLAKEEKLVLSEEEKEYKSKRKQI  
QEKLIKFAIRIPAFMYLTDYRERPLKDVITQLELGLFKKVTGLTVKDFELLVSLGFFNNV  
SRSV\*  
>SPBIB\_v1\_90060|ID:27162144| protein of unknown function [Uncultured spirochete bib]  
VPDATLRKLTGHLTPAMTDHYDHTTIDDLRLLAKAQDEKLLGTIEATKEE\*  
>SPBIB\_v1\_90061|ID:27162145| IstB domain protein ATP-binding protein [Uncultured spirochete bib]  
MIRTPQERERTRITIASMSRKLMLSSRVVELCESEATPRQEEFLLKVLSEEIDRRERGKK  
ARLLNRAGFPVFKSFEDYDFSEIRFPPALSKEELLRADFIPEKKNLVLYGGVGTGKTHMA  
IALGIAACEKGLSVRFLTVTELVLKLTEAYKAGTLERLIRDLDLQDLILLDEWGYVPVDR  
EGSQLLFRIIADSYESKSLILTTNLEFSKWGGIFTDEQMAAAMIDRLVHHGHLLEFEAKS  
YRMTHALMRQPGPGTAKPKTTVEAGSRLGEGGA\*  
>SPBIB\_v1\_90062|ID:27162146| Integrase catalytic region [Uncultured spirochete bib]  
VINMPQIQGIREQYREGSSVAELARIYGVDPKTVRKYLKQDDFSPKPEKMTKESILDPY  
KPLIDSWLLEDQGRWHKQRHTAKRIHDLISEVAGYACSYNTVQRYVKRVLQEQRVTRAS  
MELVWHPGESQADFGADFLERGTMRVKKYLTLSFPYSNDSFTQIFGGETAECVCQGLKD  
IFAYIGGVPLVDFDNATGVGRRIGEIIHEAELFSRMRAHYGFSVRFNPNESGHEKGNVE  
AKIGYTRRNLFVPEPAFDDIEDYNRTLSSLHASKAQESXYKLLPIKDLFEEDTRALLPL  
PRTAFDPVRYDYLDKADGYGKVRIDSRHYSTSPYAGQEVLVAIRAHSIDILDDHKRLVV  
RHSRVYGERSDSSDYRTSLAVLMNPNPAGWKNNGIRELIPDPLKSLMDRQQRMQLHATLK  
TMHTLSSEYGFIAVQALEEGVQSRSTSFHDAAILAARIAGYGLNMAPERGQDLHVYDEF  
LEGVQV\*  
>SPBIB\_v1\_90063|ID:27162147| protein of unknown function [Uncultured spirochete bib]  
VLELGASNPHGSEGFLIYGANPGARLDRAAIERAFDKALIKPSLEGRYDTSSKEEKESVF  
NIS\*  
>SPBIB\_v1\_90064|ID:27162148| protein of unknown function [Uncultured spirochete bib]  
MKRQKQEKIDFRVFSRTVWGTKKKYIRFLFCGKAFLTRATDAPTAAGAGIAAKIMATED  
LEAVAKAKEQKKVIKLDEIDRLAELPVIEFLRFLWNPSRSPYLQDMAAAGRPLSGSYIRD  
NARNANTYWAIAPLDSLPMQDLKLDKHSRIRSMRQKGSRYTISAAIDCIRTPCSWLLS  
RGVMEKIDFSAIVLPKAAVKERGILTNEELDRIVHLEVVGWQDSNLKTHISVRPRNRM

GGEKNEGMAPVGWREKLIILLLAYTGARVGEARALMWKNVDLEKGLIRIEINYTDTDGLK  
EPKAKSRRTVPIAATLEPFLLEARRVAQEIGTANPDGFVLLNAADPIRPIAMTTVKRAWE  
RVLRAIGISYEEQKARNLVIHGLRHL YATRLVDAGLTPIEAAKLTGHRVIATLGRYSHT  
QPETLKKSSREILDGIKN\*

>SPBIB\_v1\_90065|ID:27162149| putative Adenosine kinase [Uncultured spirochete bib]  
VKAESRGFLFGIGHAMCDVSARLDDEGWAAFEKVFVGFSAASCRPHHIDIEAALKALAFIEK  
LAGEGHADLVYSAGGSALNAVRAASMLGAKASFAGCIGADALGDIIVNDIEARGVRSLE  
RREGHTGVFCTVRHGDSEDSKPEAPPIILASPAGARKIREMPLASFIPEGSGVVHAEG  
LLADREGLLEEYVFSKAKGLAVSIDLVSAEMARRYRAPILNLIERFVDYVFCTKAEFEA  
LGADIARMRRDIAWIVKADKEGVDCYFQGGSVHEEAPRGPVVDLGGAGDAFAGAFLYGRT  
LGWPLEACIKLGSAAAACALRAKGSVPDAVCMRSLQA\*

>SPBIB\_v1\_90066|ID:27162150| protein of unknown function [Uncultured spirochete bib]  
MLNRFCVYMAWHNYAKPFRIKANRKARMTHAEAAGIPREL V ATGRAWMFRERAFSLRSL  
DLLDQKLWKRAFSTPLKTSAEYLPRYALA\*

>SPBIB\_v1\_90067|ID:27162151| protein of unknown function [Uncultured spirochete bib]  
MGHTRLSVRFDPGLCVVVPGHVDAEPIEHIGDIAGKAXX

>SPBIB\_v1\_100001|ID:27162152| putative Radical SAM domain protein [Uncultured spirochete bib]  
MMHEGKIVTAAVAADMANPIFELASAKILIVRLSPFRDIEVSYSHL VLFDEARRALPDAF  
IDFAFLPTAPDRLLNAKCGAWFFGRASGRSPSEFDIILVSCSFTLELVNLPWLFAQSGI  
PTSRAERLRNNTIPFVFLGGSSAVTSGALLQIREGLPVDSLVD AIFFGEGEGRIAEIVRT  
ASEGQKQNAAKQVILSEIAAQVKGFWPCSPWKTTERSICEDRPAVLTSPLVLNGEYAGHA  
KLAITAGCTGHCSFCLEGWDRRPFREKPFLELSNAASALKKTTGASDVELFSYNFMHHE  
ILNIVPVMGRYFMHVSLMSQRIDLLARIPHLLAAEFAAGKRSFTLGIEGISARMRQYYHK  
GISDEQIADAISAILEGNARELKLFFILSGYEKPSDFDELHTLFD AIGRFKEQTRASTRI  
IISAGYLVRLPFTPLQFAPLACDRDRLERISATIESLCNERKLEFRLAASFEDYWTDQLL  
SIAGPQAHDWLCACAESGFVYDTHISRQAAASLDAFLRRKKEFSALLDEKTS DYRPCFSF  
LESDAHWNLLRAHYERAASYLEFSHAPKNQPKLGKRRTQSALQSTSTHSALSIAAEKTQA  
VSTIAALMEAKSHFQPLVVR IREDPALAFATLAYESSWLIRAISTLVPNAERALFECRQI  
VPGNAWDKVFSTRAGIEYGLSGEKWFALYGPDIRTLQKIVDAASRKIKASLQSGQSTAALP  
SAYLLDIEPQDPEITPEECVLSFSLPQEYNSFVGRIIEIWLEKQDIHFTGKKIENGYEYL  
VAHSSLNKRILLNAEYHTSSSGSFVTMRIGKRADMLLLSDYLHKEASDH E LIFNIEYWE\*

>SPBIB\_v1\_100002|ID:27162153| putative DEAD/DEAH box helicase domain protein [Uncultured spirochete bib]  
MEAFISLGVDIRLTKALDAFGFVAPSEVQKRAIPVLAKGQDLIMQSETGTGKTFAYLLPI  
FSRILGSAARLSGLDWPSALIICPTQELAVQVARQAALLAQSASVPIKSLALLGGTHFSH  
QKEDLKAHPHIITGTPGRLADLVRMRFFDISCIEFLVDEADRLFSKEYIEPVEYLLSKT  
PASCVRALASATIPEKTRKKAYPWMHNPVVVDLSGEGILTDAIEHWVFYAEHRKKIDLLK  
RIIAAVRPQRCLIFASD TYRVQRATERLQASGLKCHSILSRMEKQSRHSAIDQFRQGIIP  
FLVTTDLGARGLDISDISHVISLDLPEDSNAYVHRAGRTGRAGKKGISILVADGLELERA  
SRAAVKYGFVFRTKWLESGQVIEPEVEEFFERVQTMEDERSRRLKS\*

>SPBIB\_v1\_100003|ID:27162154|rnz| Ribonuclease Z [Uncultured spirochete bib]  
MNLEAFVLGSGGMMPLPYRQLTSM LVRREGELFLFDAGEGTQVSIRRLNLRWKKITAI  
SHMHADHVTGLPGILMLSSQVDREPLYIFGPPRLAEYIEQNRRLDMYINYDIVVREIS  
DREVWQGEDYSIRAFPLKHTKMCFGYALEESPRPGIFYPDKAMSQGVPRGPLWSELQSG  
KTVTLSDGREVRPSEVMGEP RSGRKFYSYVTDLSYFPEIAKEVSNSDLFICEGMFEHGLVD  
SAIEKRHMTARQAAQIAQDAGNVKQLGLIHYSRYADRELKVLLEEAREVFPNTVLTKDR  
MRFPID\*

>SPBIB\_v1\_100004|ID:27162155| exported protein of unknown function [Uncultured spirochete bib]  
MKQIFRIILFVATLVLIAASVMYVAMKIGEIRLNGEQSASAEY TILRNAVAPITSEQELG  
DQFIRDRLKSLYNASAHLLAVQVLDNRNGLVLWKMPDESAYFGSPATTPGSVFRAPGLSTV  
IYMTPLPDGMKMMALYSILSQRDIANTLLLPIALAVWIVLLVILQFVLKEKPAAYAALA  
AAPPVAEPQAQSEAPPEGETESASQAEMPAPPSEIAQPDEEIIAENEEIPATKEKPSQEE  
APHYPEPEEQGVSEEA E VPEMMPEPELQPEPEEPIRPRIAVQEPEYDLEHAEFVSPPP  
SQQEEKILHDFPSIASGALERALESQLQTRQDEEISLMLIHCVLAGEGDPSALALGVT  
IREYFASDTLVFELAKGCHAAILPGVDTGSCLKLAVDLDDVLT TTTASLYKDLSAEPFFYF

GISARYGRTVSPARLYKEAYAALQKARESESRLAFKPVNQE\*

>SPBIB\_v1\_100005|ID:27162156| conserved protein of unknown function [Uncultured spirochete bib]  
MSVGMKIRKRLLPAGWYPENADEIRSLVAEWTKLQKSLSAYAAVAPHAGWYFSGDLAARA  
VWSLRECDTVVVLGGHLGYGDPVLYASEDSFDCTVRIARNDTVLLDAVKKELIDVGINEF  
ALDAGMDNSVEIILPLASLRFPEAKIVWLRVPPDFKARELGSALARAASSCGRSLSVIAS  
TDLTHYGPNYGFMPHGVGESACDWVRNENDRGLINAALSMDAERVLSHARERFSACSAGA  
VAAAISYSLDSGAKRGILIGHKLSYDVHPDRSFVGYAGIAYVK\*

>SPBIB\_v1\_100006|ID:27162157|murD| UDP-N-acetylmuramoylalanine--D-glutamate ligase [Uncultured spirochete bib]

MSITEDITEFRSKKVTIMGLGLHGGSISSARFFARAGAHVTVTDLRDQNTLAPAIEQLQG  
LDIRFVLGAHREQDFSDADIVIKNPAVRRDSPYLKVAKRIETDISIFLRYQSPLIAVTG  
SKGKSTVASAIWHVLSQAGKTALLGGNITVSPLDFDKTAPDVPVLELSSWQLGDLRGM  
GLLKPQIAVLTTLIPDHLNYYGSMDAYVADKRVIIYQAQDETCYTICNADQNWGRSFAQET  
RATVLWYSEKPLEEAIGAGARGGWLALDILSQTKEKNAEAGAPHSGHVLDPKEHPELYAG  
YGTFTGTDYSHELLVPQHIVVPLGHQKKNLLAAAVALCAFGLSAKEIAPALGSFPGVPHRL  
EYVAEIDGVRWYNDSTATIPDAAIAAINSFSFCPVVLIAGGSDKSSDFSFAFAEKARSLKDI  
ILLAGSGTDRIIALLEKEKISYKGPYNSMRDAVDSAAQSAARSDVVLLSPGCASFGLFLH  
EFERGDLFKKEVFEISARAHSARLSPAQEQSEQSK\*

>SPBIB\_v1\_100007|ID:27162158| Pyruvate/2-oxoglutarate dehydrogenase complex, dihydrolipoamide dehydrogenase component [Uncultured spirochete bib]

MNRIENHPILQSRKDRRQIRFYFDGDEIAGFEQEPVASALIASGHHVFSHHHKDGAPQGL  
FCANGQCSQCTMLIDGIPKKSCMTPLSEGMDVRTLYGLPHLPAEDEPLVQAERRSVRTDI  
FIIGAGPAGLAAATELGRMGYQVLVADDKAQAGGKLVLQTHKFFGSEADCYAGTRGIDIA  
HILEDEAKRHPSVTILTNPVVGIIYKDRKAGIYLNYESYLLVEFTALVVAAGAREKALHF  
PGWDLPGVIGAGAFQTLVNRDLVKA YRKILIGSGNVGLIAAYHALQAGITVAGIIEVAG  
RVNGYQVHADKIRRMGVPISLNSTILKAERDKVERAIVAAVDEKQPVAGTARAYEVDA  
VLIAAGLSPCNEFLEQARRYGIMAVAAGDAAEIAEASSAMYGGKTAAMD LASMLGKKIIV  
NPEWETTRKVLASRPGDSYERSPVVPGSEWRPVFFCSEEIPCNPATVCPVGAIQLRPMH  
GNIMDLPYFEGNRCTGCGSCVAVCPGLAITLVRRIPGEKALADKASGDKASGDRAQVVLP  
WEFNADFDIGTELVDLVDQKGFVERAPVVSRRVSSRNTWLLTFHV DIAHASKIAGIRVQ  
PQEASAFQSAEIPADGAADTVLCRCERVTLGEIVEFIRNNKVRDINQLKSLRVGMGACGG  
KTCSQLVGKAFRLAGTDPAEVEPATQRPLFMEMPMGA AVNEGLHKLGGKEAGARGAP\*

>SPBIB\_v1\_100008|ID:27162159| putative oxidoreductase [Uncultured spirochete bib]

MKHFDVVIVGAGSVGVPLAWQLAARGLKVAVIDQEASWGRGQNRAAIGGVRATHSDPAKI  
RICLESIEIFSSLKSKYGLDVEWQPGGYLYVAYDEATEMQFRSLLKKQKTAGLEIDWISP  
EKIARLAPGIRTEGLLGGTFSPYDGYASPLMAATAFHKLALDAGVLEFFNRRVESIRKAD  
NTIISLTAGQEEFSAEFFVNAAGAEAADIAKIAGFDIPVFPDCHEAGVTEPVERFMQPMI  
VDIRSDAESGNYYFYQARTGQVVFCTIPRPQIWRDKDSTSTFLPICVRRMIELYPRLRN  
LRVRRRTWRGMYPMPDGLPIIGYPDMAINFLQAVGMCGQGFMMGPGLGHILAQTIMAGGS  
HANPAGATEYNFIFDEFINSRFDHAELLK\*

>SPBIB\_v1\_100009|ID:27162160| Rrf2 family protein [Uncultured spirochete bib]

MFQVPTKTQYAIRALVHLVHAGSASVATIAEAEHIPAKYLEAILSQKLSAGLVISDRGRS  
GGYRLARAASIIQMSEVVQATEGEIRPVECVDNATICVVSEGCLPRRFWLGLKKTVDEYL  
ASVTLAEIAEPGLSDSLSAFRKRPPAPARMNRSN\*

>SPBIB\_v1\_100010|ID:27162161|iscS| cysteine desulfurase (tRNA sulfurtransferase), PLP-dependent [Uncultured spirochete bib]

MNARYVYMDYNATTPLRPEVRDLMVRTLDVYGNASSMHELGRVARAEIEEARAHAHVAALIG  
AQNPSRVYFTSGGSESNTVFNTMFLIGNQKRRKIITTSIEHPCVLNSAAHLRDEGFPV  
VFLPVD RDGRVMDAYCAELSPDVLLVSVMAANNEIGTIEDIKTIKLAKEQGALVHTDA  
TQAAGKIPVSVEDWGV DYLTLSCHKIYGPKGIGALYVRERAPIEPLIRGGHQEDGVRAGT  
YNNLGIMGFGEAARLARAELAEYGQNVSRRLRAMLRGLILRVPNVRINGHPTEVLPNTLN  
VSFPGAEGESILLSLDLEGIEVSTGSACASGSLDPSHVLM AIGLGP ELAHG SIRFSLGKY  
TTEDDVRYVADKLPIIARLRMSTVPAEEIIGEIRTEGAHPEGAK\*

>SPBIB\_v1\_100011|ID:27162162| IscU protein [Uncultured spirochete bib]

MDAFQWLYSDIVKDHFTNPRNVFDPDKDKDFKPD AEGMVGNIKCGDQMMFMLKIQNIIA  
DVRWKTYGCASAIASSTMLSETIRGMNIRDAYHIKPADIASRLGGLPENKIHCSVLGDKA  
LRAAIDVYLEQHGRAGEFKGEDAQIICKCLNITDKDIEEA VRQGAHDWHSLQEATKIGTV  
CGSCKTKAEELLHEFVHIYS\*

>SPBIB\_v1\_100012|ID:27162163| Endonuclease III family protein [Uncultured spirochete bib]  
MNLSTAEDIAGARTFILEKGREHYRDL PWRKTSSP WAILVSEVMLQQTQVPRVSKIFP  
LWMERFPVPSALAAVPLSEVLRAW SGLGYNRRALNLQKAARILALEYKDAVPPSEEALRS  
LPGVGVYTARAVLAFANIASVFLETNIRT VFIRHFSAGLSRET DGTVSDRDLEKIGQRL  
LDRQNPRAWYSALMDYGAWLKQNEGNFGKQAKKYRPQPPFN GSMRQIRGAILKSLETS  
LPVDIVAERLLTDPERIYSCALQLAQEGFLEIQTTESAEGPESARWPESAAADSILLNLP

\*

>SPBIB\_v1\_100013|ID:27162164| TRAP dicarboxylate transporter, DctP subunit [Uncultured spirochete bib]  
MKRTVYTVLALMLLLVPSAVFGQITLKL AHLNPQQPYDVASAAMA AVFKSEVESKSNQI  
KVELYPNGVLGKEAETLVQVKSGVVQSFIS SSGMAQFYPLIDVTNMPFAFSSYNVGYKV  
YDGDGFKELAADIEKKAGFHVLF GFGESGGFFAITNSKKPIKSPADMKGIKLRTMALPLHQ  
AIVKALGASPTTIAWAEVYTSLQTG VVDGQMNPIIIAMAKLQEVQKYITLTNHL YAPYV  
WVINPKFYNSLSDELKNVDDAARTAI VAGRGLSRIIDSTEKGLPTLAEKLQVYVPTKAE  
MKLFRDATVPAAREFMLSQYKDEGKI WVDKFFDAIDKAEKELGY\*

>SPBIB\_v1\_100014|ID:27162165| membrane protein of unknown function [Uncultured spirochete bib]  
MENEKPVSRSVRRISALIDKIVSFLCAI VFGAMTIDVLLGVFFRYVLNSPLNFTEELARY  
LMIWGASLAISLGV SAGEHVGLTVILDSMKKPNARKALAMLVNFFVFAFLVFM SVYSAGA  
TIEAKSQMTQALGISMVLPKLA VPLAMILATIQQIILVSIMILADPNGR LTTSTTG YIDI\*

>SPBIB\_v1\_100015|ID:27162166| TRAP dicarboxylate transporter, DctM subunit [Uncultured spirochete bib]  
MIVSVLIVFFAMLVIGVPIGFTLGIAGV VGLLLMGSGVGLLSMAPLQFFTGLDMFTLMAM  
PFFILAGELMNKAGITRRLVHFANVL VGHWRGGLAHANILASVFFAGMTGAAVSDTAAIG  
TMLIPAMVEDGYD VDFSAAVTAASSIIGPTIPPSNMMVIY GSLMNVSIAGLFAAGFMPGF  
LLAALLMVMSAYLSFKRGYPKGPKTTFKEKLIATKDAIIPLLMPIIILGGILSGLFTPTE  
AASVAVFYALIIGFFVLKSIKLRDIAPML VKTARVTGTVFLIIGTASILSWVLAINQVPQ  
AIAAFLISTTRDPKLVMLLILLMLVVG MFMDIAAALIILGPILHPIAVSLGYQPIHFGI  
IMVLSLNIALMTPPVGACLFVAC SISKISLAKLSKAIFPFIIMEVIALFIVAYIPEISLF  
LPRLLG FVK\*

>SPBIB\_v1\_100016|ID:27162167| D-alanyl-D-alanine carboxypeptidase [Uncultured spirochete bib]  
MKYFRSKRLDGVRKFRQFIAFLFFFELFA IANASALSLEYSQFGVEIARPPSLNARSAI  
LIDAATGTVLYEKNADIALPPASLTKLV TLHLAMEEIKAGRLSPDEMVEIDARDCSPYIP  
YGSSLMYLRPGMKVSIRDMLGA AVVSGNDAAYALARRIAGSNERFAEMMNKAVAEMGFD  
RMTFVPSGLSEKNLVTARQFALFSKRY IELHPEALKELHSVKSIFRPEHATTEYHPD  
GIIIQYNRNPLIFS YDGADGLKTGYIIEVGYNMAATAQRNGTRFIAVLLGGSSTPYANGT  
AVRTKDTKALLDWAFSNFSTARPGYIAPKPLR VWFVKTIQLLPEPNGEAAITVPSSLKDR  
VWARIELPKTVRAPIQKGQKIGRIVYEIDKKEIGSVDL VAPTEIQRGGFFRILIDTVLRF  
FAFILGKV\*

>SPBIB\_v1\_100017|ID:27162168|asnS| asparaginyl tRNA synthetase [Uncultured spirochete bib]  
MTLLPTIKQLLAMEPIGQEVTIRGWVRT KRETKQSTFIEVNDG SCLSNIQC VVESALLEN  
EALKSMLARIATGASVEIAGKLVPSAKGQKAEV SVIRVKLIGEAPADRYPLQKKAHSLE  
FLRELAHLRVRTNTFGAVARVRNRMAFAIH QFFQEHGFYVHTPIITASDAEGAGAMFQV  
TTLDLDALAKSGGPVDYDKDFFGKRAYLTV SGOQLNVETCYQALS RVYTFGPTRFRAENSNT  
TRHLAEFWMIPEMAFAELSDNIALATEFIQYLVA VALKDCAEDIAFFDERIQPGLRESL  
EKVAQTPFAHMTYTD AVRELESANTQFEFKPYWGCDLQSEHEKYLTEKVVGGPVVVTDYP  
KEIKAFYMKQNEGDGKTVAAMDVLVPRFGEIIGG SEREWRDLVLEKRIEELGLSKEVYSWY  
LDLRRFGSTPHSGFGLGFERLLLYVTGMTNIRDVIPFPRAPRQAEF\*

>SPBIB\_v1\_100018|ID:27162169| TM2 domain protein [Uncultured spirochete bib]  
VRYSLSTAYLLWFISGFGALGFHRFYLGKTGT GLLWLLTGGLGGVGCYDLFTLPNQVRE  
ANIAAAREALGYDAYGAGSGFIARVRPAETPERVILRIAKANNMVTAGEVAIEANISI  
EEAQKQLDSLAKKGIAQVRVRSSGVLVYFFPEFSKENADFID\*

>SPBIB\_v1\_100019|ID:27162170| putative Peptidase C14 caspase catalytic subunit p20 [Uncultured spirochete bib]

MYFESGKALEQHRLKPVREK GALT MQRLRAKRHLSGIGSLVPLL VLSVILMLTGCELPK  
SASSSPGVKYAII VGINDIYI LPYGRNNDLSYCVADANS MKTMLEEAGWTVKLITAESNE  
STNRFATKSAIESALNNVPSDAESFMFYYS GHGSGGFDPGEAYIIPSDWDPRAFNFTRM  
ISTSEFASLLEKVP AKNKIVILDSCYSGGFVNPAESSDAVPGNVSSQ QISSSIDMFLKFG  
ELLALNAQYRSADASLAPLTISAAGWDEESWEQGSPIYHGLFTY YLLKAAEVNVEGRMPG  
DADGDNVLSCLEAYNYAKKALEKTNYRYLPHISGGLRDFALIDNRGN\*

>SPBIB\_v1\_100020|ID:27162171| exported protein of unknown function [Uncultured spirochete bib]  
MQRFMGKTRKAGLVAAFIILLFYANAMNAEAQPTLEAQFLYANA WTWTSATAFSRHTGYA  
FSLDAQWLFPLRLSSSAQEENRGISLMFAAGVHAQHVNMGASVWLADGSRYRAWNALGFG  
PEVGVGIQFAGLSVGRKQIFALSAGPIANFANYTSTTLYNAYWSGYL KLSWEAEIDRHW  
LDVSLPVEIGSRSDGTSVIAALGAGVQYVF\*

>SPBIB\_v1\_100021|ID:27162172| exported protein of unknown function [Uncultured spirochete bib]  
VKKIAAILSLIFASSLLAGMAACKPRIRLPEDGSITGSAKWLVISSLYCQMKAEPASAS  
LDKGILRKGTVLKIEESRFSTAENEQGTLWFKVQNAGQSGWVSIRDAHTYPTETQARNA  
RRME\*

>SPBIB\_v1\_100022|ID:27162173| protein of unknown function [Uncultured spirochete bib]  
MDFIRSWIIPPLIGAIIGYFTNWLAIKMLFRPYKEIRIGGIKVPFTPGILPRERERLAES  
LGDTVAQELLTPKVITDRIHSPQIQKTA AKAVSIAIKGFLDQDAERLFLMRHSEQISS  
AEAALDSAAGSSLAHQIIESLRRLVASADIQTAIQHIFAEFITRLGRLKFQSLVSKQQF  
VAGIMKAAGSIGSQSVSDIVHVQSTDS ENESGY SRLRPILAALLQLPPDATIRVATDSL  
VPPAYALFLPELKQFLRSKEFRSRLEVEGRSFVKRALDRLGPVQRLFVSLAGYETRISQS  
MPETIEDLIKTIELLLDDPEVPERLAEACATIVSRRAKTGPASTAASMQRENIASAIGQ  
SLKESDELKLRAERVYDDIADLSLEELAGGRMNAEDISGFVLSAFVRAIDSEKEISSST  
IGTLFIDVLKESAKGKTIAEFFGIQE QDIEQISYTLANALLQLIETRMPLLVEAMDIRGM  
VAERIDSLDMKEVERIVLQVVSHELAWITWLG GILGAMIGFIQSLIALL\*

>SPBIB\_v1\_100023|ID:27162174| FolC bifunctional protein [Uncultured spirochete bib]  
VNQLHFKSIDEVYDFVLGYVNVEKGQATEFKLDRMNW MASQLGDPHLGRMTIHVAGSKGK  
GSVATFIASALERSGIPTGLYTSPII SWKERITRAGKELPDNIILRAADEVFELVEGKT  
ADNFFGGELPTYFELTTLIAFCAFRMAGFQAQVIEVGLGGRLDSTNIVSPDVCVITPIEL  
EHTQFLGSTIRLIAGEKAGIIKKKVPVCTIQPKAEALEVIEAKAAAMEAPCLV VGRDIHV  
SRVEVDTEGTHCVLEADQNAPSAVHNFLGGRPCPVQTQLV GSIYAGNMALAGLALSQLPV  
SIHSEHMQEGFAKASMLARFEIASRNPFI VLDGAHTPESVRTILSTFLELAPSPRILLFG  
CAYDKRHDDEMADLLAPSFEDIIITRPGSFKQSTPEIVFESFHKRKTDSVIIEDTALAII  
AVRRTQEKGGSLVTGSFYLCAEYKKLLSKS\*

>SPBIB\_v1\_100024|ID:27162175| protein of unknown function [Uncultured spirochete bib]  
VRIIHA AEIGPSAKPSGRRNRGTAFSQKPPSQA EESVRVDQPLHLHDKQIIVIESEGA  
VFDIHYWHETAYLPSFIGCFGGNVDP SLSGEVWRTVALKSSLRGEPPLVILLAALRVLN  
TLSPSMQRAVVIKTLEKYSLSSESSTEDLLRLDEKHPVEMMVIDWLSMAEGLIQETGRVPH  
FSTAEFLRSVSYIAPQSQVLVYSTLAESSAMRMWQSSGLGECFFRIAGKERGKPGEYLR  
AAMSAGFERSSIVAIGASAAMFRAAQLAGIRFFPIVPEQEEESWKILAEQWFPAYLRGEA  
WKIDMQAERFYEQMCHEFNVRETAE EIGRKFGLQQSKPKFV\*

>SPBIB\_v1\_100025|ID:27162176| AAA ATPase central domain protein [Uncultured spirochete bib]  
VAGQPNMPSHPLFSPGAVAHSPESGEPLASRMRPRTLDEFV GQEHIVGEGRLLRRAIQK  
DQLSSVIFAGPPGTGKTTLARIANTTKSHFITLNAVLSGVADLREAI EQAKTYRDMYGR  
KTILFIDEVHRWNKSQQDALLPWIENGTAILIGATTENPFFEVNRALLSRSRVFLKQLT  
RDDLFRVAQMTLGDKERGYGLYTVEFE EGALEHLVDTADGDARSLNLELA VETSTPQW  
PPPEGSKIFVSMASAEESIQRRAVL YDKDGDYHFDTISAFIKSVRGSDPDASLYWLARMV  
YAGEDPDFILRLLILASEDIGLADPQAINVVSACALAFDRVGLPEGQFH LAQATLYCAL  
APKSNSTLGYFDALQAVQSEQAEPDHLKDANRDKA AFGHGEGYQYPHAYRDHWVAQQYL  
PASLAGKLFYFSPQIGFEGTRRAEVLVRREAQLAVLPSDIENESSQSLVWSKEGESRTR  
WRIRSEFSATERLLAIRKAVFDFVLPAPVDNITDPRLGFYAMEAIRRSSEGKVFAVLN  
DESARMQLENLSKAITEILQPEILLYDECNNGSEGPKKISAFLEEAQP AFILVCEVERIP  
LSVIETLAFQAKQAASKTARFFAFDIDASRSSMLSGALS AVANLGKEETKFLERLREFEL  
ERQGGPTYAAKPHTQQNRSNWRDVLPHPFPEAILESITLNGAFTRPIDDEELA QWLDPGT

AYGKVFERSIFNQKDIKMMEGIVQRYNRSPSWPIFVSLYELRL\*

>SPBIB\_v1\_100026|ID:27162177| protein of unknown function [Uncultured spirochete bib]  
MNIYGYSIKLTKLATGRAKQKNAALSRKGSDIAGLYAALALTLLVLFAGCDNSFSIFKS  
ISQETKQVGVDFLKNVTVRAMANDAANYALLGQVVWRPIDGSASWNVLSVNGSTDYFAA  
GLASDGAKVYVAKANSNNVLVDVYKTIDSGATWTAMNAAASIGSSAAVDWLKCANGTLFV  
AFHASGTYSLYYYDGAAFKSAGIANISRPLIDIVWDGSEYWAISDSAAYHGSAGAMTEDT  
APALAQGLIGLATDSAGRVLISRSDGLVYSLQSGAWTQITIKASTKLGPLFLTQPAATK  
TIMVVGKIATYGYEYDETGTSGLKENGSNYISTSSSVYLSTMLSKHVIGFWQPSNDANI  
LYVMLAAGGTDSYALYKNIFDPTANAGAGAWSGWTAE\*

>SPBIB\_v1\_100027|ID:27162178| exported protein of unknown function [Uncultured spirochete bib]  
MKKKLVAAAIVLLVLCIGMVWAQDSADPFAANRKKGSQSIEISPGGFLPLFVLDNSNFAMI  
STPNMSPGAAFSVLRYRMLGKNLGVGGSIAGSFVTTVGGRTLFLAPVCVSSTWVFGTDPM  
EFDISAEIGMNMVRLSGNGIISPIAKLGGGISRYISESWSIGGKLMWWFVPELHLGSYAN  
LNSYASFLEFSIGAQYLF\*

>SPBIB\_v1\_100028|ID:27162179| protein of unknown function [Uncultured spirochete bib]  
MLLVRPHGNLIQQIRALKRLAMNWETDPLPMALPEGFICGWFDSQLSQARAINETFSEE  
GYPGAGSKASNEQFFQQALVQHAQEICAALPDVFRFESVVQRGGEIILEFSRDIDSGKLQ  
EAMHQFAHDAGLVCRESAGTYNGIWLGSGSLPELQSPLSFKKYELVLYLAELPESPLNG  
YYFKTIARVHRKMPSHARSRKE\*

>SPBIB\_v1\_100029|ID:27162180| conserved protein of unknown function [Uncultured spirochete bib]  
MKRKTEELAAFLDITISRWGVDICVLDLRSQNDDELDPHYALVFDVYRRGVPSAEKREQ  
LFKNPGAFESAPGGMKDRFFLDEIPIRVEYKHIPVVQDMVERPLHHIKLLKNTGTYPYLR  
LLKFPLVFSRSDWIDRMRAQLNSFPPEEAWKGLFDSFSAKMEHYLSDFGAAAVSENQFFRL  
MSRAGFLRFAGASIFMFNHAFEP SHAEYEAQLKDLTNLPANLASLWDAISGERNDLTEFR  
KFELARLLAREIFELQ\*

>SPBIB\_v1\_100030|ID:27162181| exported protein of unknown function [Uncultured spirochete bib]  
MSIPVEAHRSTSFALFAALFFVLAMIAGCKSGEVKSFALWDEKGLRLSFRSTAPYAESAG  
SFTKQGEKQRYILSRSAIPDGFARLKLAAQSSSVDFQVSYGDEKKGKNASVLCMPQTG  
QVAFILPFEQLKNLQWLEIKLQKFDQAQKTSIAEKQPASQNGPSTLLQLQEIRLVPQMRGF  
RKDADILEISPOFSFQAGKSANRYEIRQPFSSGSEAEKLNQARLEVVLEGDAGLATLFW  
GEQKIIYRHSAGASQLVIPFALFGYDPAKVSLEIPVSMQAKVFCADVYPKDNSLFLSLDPG  
LLLYHAPLTEQNYFLARWDLMPDVLFLFKDYATQDRYLKRLAFFVEKIGFVGR LAPDSE  
IVNLHGWNAHDYRPEDIARFFDA AASQNFPLAAEEIELRELLKQGILIKSGSMYLPQGG  
AIVSITQESPSYLQSKFLVHELHALFFTDNR YRDLALS LYQNLNDEEKWFLIQYFRWMR  
YNIDSAYLMANEMQAYLVQQPTRDLEKYFSVTLGERLAQEHPELQKNIESYMQNH LAALV  
RAANQLNSYLHTAYGFEAGMLFRVR\*

>SPBIB\_v1\_100031|ID:27162182| protein of unknown function [Uncultured spirochete bib]  
MEKDKNKSPSANYSDDVPEGLFISPLDDSESFRKMEAEAEAKILSPPRAIPANSNTSDEFA  
PSAARNNVEQEDATHLPPPKSAEATPEQLIFRFAGELKSIKQDLSIKQHFEALKKPQPA  
AALQPATLQAPAAQQA AAVTQPAAGQADPDTIALLNDVKLLLYLDRLLLES LPEEKIEE  
FANSEYFSLYRNIFEHLGLS\*

>SPBIB\_v1\_100032|ID:27162183| exported protein of unknown function [Uncultured spirochete bib]  
MRLPRINIRKGVVLTSLAYGFFSLLIAYCCVSAIAGKAGVLAYQDILLIQKQEIQAIDY  
LQAQNLQKSRAIEDLKNNSVVAEAGAAVLGYVRQGEMLIVLPDSWRASVKDGEGELRLPV  
VMGDSTGLPDAIIRFMAAITGLFALLAIQLFHFNPEAKERKHISLEKQE\*

>SPBIB\_v1\_100033|ID:27162184| Penicillin-binding protein, 1A family [Uncultured spirochete bib]  
MRSHKVRVYIFIAVILMFTAILGAGLGLALS GTANAI RTENFTEFESALPTKIYDINGR  
LITEFFAEQRI PVFIKDLPNYLVEAFITREDQAFYSHRGFSLRSILRAAIGQILGKNLG  
GGSTITQQLAGDLYADRKVISLQRKLELWWALQIERRFTKEEILEMYLNRTIMGPAVYG  
VEAASRYFFGHPAKDCTPAEAAILAIQLSSPSRYNPFRNPMLARDRSKEILDQMVARHVI  
SRAEADESFDAYWASFDYSRVAVSAFYNREDKAPWFSEYVRRQLEDLFYGSIDIYSDGLS  
VYTTLDLQKAAADLYMKRGIETANASF KATNSQRLTEAENTYVPIVELLGLAFDLPTLY  
APQSRSETDSQKYFLNVINPVL DATSLLLNIASLKP YVGAASAKIKTELEKTTVEGALVT  
IDNSTGYILALVGGSNYSQANQLIRATQAKLMPGSTFKPLYSSAAIDSKKITEGTYIVDE



PTTFYNEDGTPYSPQNFKGEWKGSVLAWQALANSMNVPSVKVLQTVGFDAAISRAAALLD  
ITDPIEIRKTFPRYYPLALGVIGVTPLQMARAFSVLANGGKAVTPIAIRYIEDRYGNVIA  
EPEKDALQALRQKSPQVVSPQNSAIMIDMLKR VVSAGTLGATQSGSIFKQTS PDGKQYV  
IPIIGKTGTTQNWADAWTVGSSPYTTAIWLGFD RPNLSLGVVSQTGATVAAPVWANYMRD  
IHLGLPYKNFSKPESGLVSVTVCAKSGQLPTEYCTDGT VNLMYLEGTQPTTEVCTLHGPSV  
APEPVSPPGPSIARPEESPIFQNR\*

>SPBIB\_v1\_100034|ID:27162185|gapA| glyceraldehyde-3-phosphate dehydrogenase A [Uncultured spirochete bib]  
MKVAINGFGRIGRLVFQSIVDQNLGK GKDKIDVVA VVDIVTDASYFAYQLKYDSVQGKM  
KAEITSKKS DPKAEDDILV VNGHEIACIMAEKELKNLPWGKLGVEYVIESTGLFTDEKS  
WGHLEAGAKKVIITAPAKSKAEDKKIPILLMGV NQDKYNPAKDHVVSNASCTTNCLAPLV  
YVLLKEGIGIETGLMTTIHSYTATQKVVDGVS KKDWRGGRAAAINIIPSTTGAAKAVGEV  
LPEIKGKLTGMSFRVPTPTGSVVDLTFRSVKETS IQEIDALMKKASETYLKGILGVTDEE  
LVSTDFIHDNRSSIYDSLATLQNNLPGEKRFFK VVSWYDNEWGYSNRVVDLLRYMASKDN  
F\*

>SPBIB\_v1\_100035|ID:27162186|pgk| phosphoglycerate kinase [Uncultured spirochete bib]  
MIKTVRDISLAGKRIIMRVDFNVPMKDGKV QDDTRIVASLPTIKYILDQKPRSLVLM SHL  
GDPDKDAAKAKEKAEKEGKPF DLEAYLSAKHRM KPVAEYLAKLLGKNV VFLPSCFGQKAA  
IDALPNGAVAMLENTFRHKEETA KDPAAQEVLARELASYGDIYV NDAFGTAHRAHASTAT  
IAKFMNFRVGGFLMEKEVANLEPMLHNPPKPMVA IIGGAKVSSKIAVLENLLKNASSLVI  
GGGMAYTFLKAQGIAVGKSMVEDDFLD TARQLLDHAKAQGVEV VLPVDHIAADHFAPDAV  
PVAVNAQAVPDALMGLDVGPKTLELYAKVLAGAKSVL WNGPVG VFEFDAFAKGT EKVAQL  
VAEATARGALTVVGGGDSVA AVNKFGLASKMSHVSTGGGASLEYLEGKELSGIACLEQK\*

>SPBIB\_v1\_100036|ID:27162187| protein of unknown function [Uncultured spirochete bib]  
MREKGRPKGRPF SFDVRVFCMRATVRKGDATGANGTQAPGKDVAYRAKFCDFIL\*

>SPBIB\_v1\_100037|ID:27162188|cysK| cysteine synthase A, O-acetylserine sulfhydrylase A subunit [Uncultured spirochete bib]

LRIYNSILD LIGNTPMVYLNKLAASLLARIA VKLEFQNP GHSVKDRAALSMILEAERTGL  
LQPGMTIVEPTSGNTGISLAMIAAARGYRCIIV MPESMSLERRTIMKAYGAELLLTPKSK  
GMAGAIEEARALLSKDPAHYFMPMQFENPANPQA HRLGTAQEILSDTEGQVDIFVAGVGT  
GGTLTG VGEALKTQKPSVRIVAVEPSASPVLSGGKAGPHGIQIGAGFVPSILNTKIYDE  
IIAISVDV DAYAMARRAAKEEGLLVGISSGAVIHA AVQLASRPENKGLIV AIAASSGERY  
LSTPLFADLQDK\*

>SPBIB\_v1\_100038|ID:27162189|cysE| Serine acetyltransferase [Uncultured spirochete bib]  
MHMEKREKNNTPKERASAGPLSLFKSDIEAILQRDPAARTKIEAVLVYPGLHAVWLHRLA  
HHLWNHGSKLTARLISNISRRLTGIEIHPAARIGQGLFIDHGMGVVIGETAIVGNNVTLY  
HGVTLGGTSLDKKRHPTVGDRTIGAGAKILGDIHIGADSRIGANAVVVKVPPNSVVV  
GIPGQVVHRHIPHTASDEPDLHHEKIPDVLGQRVHEL SARVAALEEVIARMRAGCEDGTR  
SDAAL\*

>SPBIB\_v1\_100039|ID:27162190|tpiA| Triosephosphate isomerase [Uncultured spirochete bib]  
MKRYFIAGNWKMHK TIAEVALASELKDKLADCKEKLMIAPPFTALQAVSKIVEG SNILL  
GAQNMGPEESGAHTGEISV LMLKDLGVRV VILGHSERRHTYGENDELINKK VRLALSHKL  
EVILCVGETLEEREHGMLENVIRRQLSEGLKGVELSALKDVTIAYEPVWAIGTGKTATPE  
DADAVHAFCRQVIAEMYGKDAAKAIVIQYGGSVKADNAAALMSKENIDGALVGGASLKAE  
AFVPIAKFR\*

>SPBIB\_v1\_100040|ID:27162191| Preprotein translocase, SecG subunit [Uncultured spirochete bib]  
MGFFGVLLL VV FVIVCLLLIFLVIIQDEDS DSIGGIFASGSQS AFGSRSSNVVIRITYVL  
GTLFFITAFALAVVNKSSTGNVEKVVEQNSAQ TATSEWWNNQTQTDQTSQTQPATEGQTP  
QTGQPAAPASK\*

>SPBIB\_v1\_100041|ID:27162192| protein of unknown function [Uncultured spirochete bib]  
MVRRSFAEMGHEAAIVSDSPYGLSAYDFLV FITEPKSMFGGIASSLPQTLAKSEGLIGKR  
CLALVRKSGFRSGNTLRKFMEALEHEGLVV VQGEIVSDASSAAA VARGTPLNRR\*

>SPBIB\_v1\_100042|ID:27162193| putative Chaperone protein DnaJ [Uncultured spirochete bib]  
MKNYYEILGVHPDSSPQDIKSAFRKQAKRLHPDMHYS AENARPRESSATLRESAMRLILE  
AYKILSDAEKRRAYDRELRRRERDNKGFDYHEFLQQRSDDPESQAKLIVYDLLHDLDEEA

LAIYERSKTFADFRLERWLERGEAMDAEYCIAEEYEKRGKYIKAYQIYKLLIRMELEKPW  
FRYYFEVVALKFRFLILQKMPGRVDEEDYLDRLDEAIELKIAPRETAQYLRKKVEILLHR  
GEAEAAEEALNQISLIYPKLAGFAALRSRVQRAVDQPLAQNKIS\*

>SPBIB\_v1\_100043|ID:27162194| putative PpiC-type peptidyl-prolyl cis-trans isomerase [Uncultured spirochete bib]  
MKRIASWLILFVFAAFPLIAQTSIDKPAATFKLTKQEVISVRQLRADVDRLNATGAKLT  
VEQRKDVLDARINSMLFLQFCEREKISVSDAQVNSALAQLKAQLGANATDADLEKSLRAS  
GVFVDPKVYVVKQRLLEAYVQTKRLDDMKANLKPPTADEILKAYDLAKASLVRPDTIRLS  
VIYTDTRGKSDADIKTKDLMNSISAALKANPSKFDEYVLRAGDAAGYKAIPSLYLEKTQ  
QSKSIFGAEFFDAAFQAKVGEITSVIQTPYGFRIVRVNEFIPQKQLTSLDTPVPGNQNLTV  
QEFLAMQLASEKEQAFFNKVEAEVIDSLRKEATIKIYTENLSW\*

>SPBIB\_v1\_100044|ID:27162195|nusB| N utilization substance protein B homolog [Uncultured spirochete bib]  
VASRRKARILAVQALYAWDLAGHSLPELLSFAWLDEEKKLHYDAEILDFSRLMITGTIEE  
IDRIDAIKKHLEHWAFERLRKVDLAILRVGCYSLLYQKDIPAGISIDEAIEIAKEYGSD  
DSYRFINGVLDGIQKEIVGGLHDSNKE\*

>SPBIB\_v1\_100045|ID:27162196|map| Methionine aminopeptidase [Uncultured spirochete bib]  
MIRIKNKKQIEGIRASCQMLSALYDALKPLVQPGATPKDLDRFAYDFIVKNGGKPAFLGY  
EGYPATLCISVNDVVIHGIPGSRPLEEGDIVGIDSGIDLGGFFSDAAFTLPVGKITTEAQ  
KLLDVTKECLDLAIAQIKPHSRISDISRAVFSHATKNGFKVVRQYCGHGVGLEIHEDPQI  
PNYVSAGPNPRIMGMVLAVEPMINVTSDVRVLDLDDWTVVTMDGSLSAHFEHTVLVTDS  
GCEVLTRW\*

>SPBIB\_v1\_100046|ID:27162197| Protease Do [Uncultured spirochete bib]  
MSFGKCLYSKNFFIANLVILGIVIGFALAFMFRANPSASSTALPIVKAETPPMVAGSDTE  
AAISQAEAVQEAFRNIAKTVLPVVELDVVEGAQKNQPPQQTPQFPDFGGPDTSPDQ  
FPPQEGLGSGVIVRRSGKTVYVLTNHHVAGNATKITVKLSGDREYEGKLVGTDERKDVAL  
VKFETDDSDIVIAKLGDSKLVGDWAIALGSPFGYVSSVTTGIISALGRRGGPDGNIND  
FIQTDAANKGNSGGALVNIRGEVIGINTWIASPTGGSVGLGFAIPINNIKSAIDDFIVH  
GTVKYGWLGVSLSNITQDKASAKELGLDGKKGAFIGHVFMNGPADKAGLLPGDFVTAVDG  
KSVASTDDLVRMIGDIKAGTAAKLDIIRRGSMQTLAKIELRDATVASNNANIFPGVTVI  
SLKSDSVDQKQVPAGLRGALVVDVLAKSPAATMGLRTGDVITKINGKNVSDLKQFYETLA  
KEGRNKL VFTINRDGQTVETLAYVGK\*

>SPBIB\_v1\_100047|ID:27162198| Phosphoribosyl transferase domain protein [Uncultured spirochete bib]  
MHKEFVPYDMIRNNAIKLAYRIYKDGFIQDVIYVSLRGGAYMGNVISEYFKFVKGNRPV  
FYAAVVARSYSGFDQENIKIDGWTYNPDFLRHGDKVLLVDDVFD SGR TINHLAKVIMDR  
GLPRSDVKIAVHDYK VREYLPQHLPTPDYWCRKIEVKSKEDELWIHYMSHEL VGLTEAE  
VAQHYNDDPDLAEAMRLVTSRN\*

>SPBIB\_v1\_100048|ID:27162199|glgC| Glucose-1-phosphate adenyltransferase [Uncultured spirochete bib]  
MTEILSIVLGGGKGRFLPFTKERSKPAVPFGGKYRIVDIPISNCINSFGFKKIYILTQFN  
SASLHLHISRSYNFDHFSKGFVEILAAEQTPAHSGWYEGTADAVRKNLIHFRPHKPSHYL  
IVSGDQLYRMDLADMFRKHTEACRLTIAGTLVSREAASSLGIKIRPDGCIDSFLEKPG  
PTKDIRDFAVPEELKPKDADPNKPYLASMGYIFDAPLIEDALQMDANDFGKEIIPAIVA  
KEKVNTYVFGGYWEDIGTIRSFYEANIELTDINPQFNFYDEQMPIYTHARNLPASKLNYC  
TLNQALASDGCITNASITRSIVGIRTVIESGASLDGVVCMGADYETEAEKAENRRKHI  
PNIGIGGSIIRHAIIDKNGRIGSNCRIGIDPLPREDGEYKTHYIVDGIIVIPKNQIIPD  
GTVI\*

>SPBIB\_v1\_100049|ID:27162200|yprA| Uncharacterized ATP-dependent helicase YprA [Uncultured spirochete bib]  
MNSETANAICDELASWLSERSEIAWSTKLPARAPDFVPLPQDLHDVLSLSESLAARGIHALY  
RHQKRSYELARAKRDFIVVTPTASGKTLCYNLPVMQTLLEEPEGRALYLFPTKALSQDQQ  
SALGEIMLAGSIGMAINTYDGDTPTEIRAKARTSGRIIISNPDMLHSGILPNHAKWVKFF  
SNLKYVVDELHAYRGVFGSHVASVLRRLIRIAKFGSEPVFIFSSATIANPQELAERYI  
EREVALIEESGAGSGEKVLFVNPPLVDPVQGIRRSSALEAESVMLWLLKKGVRTILFSR  
SRLQVELLSSYLNKKLENAYNRNFGLVVKPYRSGLLPSEERREIEKGLRDGRIHG VVSTNA  
LELGIDIGGLDAAVITGYPGSIASFWQQAGRAGRLGVSLAVYISSSAPLDQYFAAHPEY  
FLSRAPEHAHIDAYNPYIFTDHLKCAAFELPFAESEPFSPDPSNQKAAELTKEALDYLEE  
EGIVRHTAGRYFWSAEGYPGEKISLRSATTENVVIVDATNGRHVDVIGEMDRPSAKELLFD

KAVYIHLGTQYQVKSLEKRVCLVERSDVDYWTDSIVKRDIEVLTIDSQAEHSECTMML  
GDILVRSQVEKYKCLRNFNTHENIGYGEIWLPPDEMQRSLIITIAQESSESGKLLGALVPE  
KADAVLSGVARLMRQLAPASVLCVDHIGVASRRDLFFKNPALYFYDMYPGGTGIAEAL  
YANVQEIFAALERLGNCSCKAGCPCIGVESADKDSKAISLQFLKLLQGACAK\*

>SPBIB\_v1\_100050|ID:27162201| protein of unknown function [Uncultured spirochete bib]  
MNLKERLALIKNEKTKLKPSAPRKRFIPEGWQEIAPLVWAREVSRPFRQVPETLSPSIMR  
PLVPAYDEAMHVEPGSVAGYIAFFDLETTGLSGGAGTIAFLCTTATFEGSSLFLKQIYL  
EDYPGEPEFLKKVIENTLSAAKWIASYNGTAFDIPLLQVRCVLNRIAMPQLRHIDLLHDCR  
RFWGRSVQSCALQSMFAFLGKERESDIPGALVPKVWLDLVKSELPSSEEQKALMVLVWKH  
NLEDVVSLEAELFLAEMAYRDPVSGVARYAIDPAAIASRLLKTGRTEEARKLLLMVRDQN  
SALDCQGEKRMRALRVLASLARREKNHRLFAETILAMDNSAYGCVAKAKLFEHVYKDPQA  
ALEWAKSAREILASQKELSKELWEGQEPRQLPYLTIESLQHRIARLERKAAKQKGL\*

>SPBIB\_v1\_100051|ID:27162202|rlmN| putative dual-specificity RNA methyltransferase RlmN [Uncultured spirochete bib]

MSGPALSNHMKVYPSGLSLAETAALLPDQPPYRARQVYEWFSKGIASFAMTNLPQSLRE  
RLSGLYGGQVRSSIEKELIDEDGSLKLQIRLRDGAAVECVLLEDIEGRKTACLSSQVGC  
PMGCAFCCKTGTGLGFLRNLPDEIIEQFHFLRDRRGFISNVVFMGMGEPLLNLENVRKAI  
VLSSEPIGMSLRKITISTSGIIPGILDIAQSGPKIRLAISLTSAPENLRTRLMPVNKTW  
PLDELKSALLQFQATRDRITLEVVLIGNMNASETDAEALAAWITPLKAQVNLIAWNPIQ  
GMPFEQPSRQMRIFSEILERKGVITVQRMSRGRGVMGACGQLGDTLQTTNPPSA\*

>SPBIB\_v1\_100052|ID:27162203| Tetratricopeptide TPR\_2 repeat-containing protein [Uncultured spirochete bib]

MSDMPSLPYNDDFFEVPEEIQSENTEIAETSKKGYQLKENRFDEAVECFIQILEKDKEN  
NYALVGMGDSARKQGRFKEAADYYRCLVFHPGNSYALFGLADCYKALNQFQKAIEIWEQ  
YLLHDNTNITVLTRVADAYRKVHDFRKSIAIYHRVLELNPNDHYALIGLGHLYDFKEYK  
EALS YWQRMVELEGNVDIRVLT AIGNCYRKLKHFDPKIPYFEKALEKEPENFYALFGIA  
DCYRGVKGQNMSLVYWNKILEKDPKNK VILTRAGDAYRNMGDYDKAVEYYQNALNIEFDI  
YAVLGLAVIARQQGKYEEAIASLRSLLQNDPKNYRIYIELAQT YLMNNQRQQAIDVLTEF  
QHMGIKNPIIQEALAKLTGKA\*

>SPBIB\_v1\_100053|ID:27162204| putative Methyltransferase [Uncultured spirochete bib]

MRITGGLYSGRIVKMPEGDLKIRPAMDRMRESVFAVLGDLTGFSFCDLFSGSGIIGLEAA  
SRGAKPVVICIEKDRKKFPVLLQNATIAEPPLFCRAMPAETFIMRNKTAFDIVFLDPPFDY  
KFKLQLLERLDCSASLHEGSLVLIHFPHEDRLEPQVGALKSIDTRIFGRSTVRFYRKGPA

\*

>SPBIB\_v1\_100054|ID:27162205|smpB| SsrA-binding protein [Uncultured spirochete bib]

MRSQVPIKIIAQNRARFDYEIEENIECGIALQGSEVKSIEGRVSFGDSFAEIKGEEVW  
LNNLHIAEYAQASMFSDPDRPKLLHRQEIKRIDRRVREKGYTLVPLSIYKHLVVL  
ELGLCRGKKEFDKRAIDKARDIDREIRRDFRLKDW\*

>SPBIB\_v1\_100055|ID:27162206| putative PEGA domain protein [Uncultured spirochete bib]

MKDADKITEQEIQAQAVTLKPVLGVRPRVYVPVLYSAILVVLFFLLVNPGLSHPGARLQ  
FSGHPDAAA VYIDGAYAGNTQDGAHAKPGPHQIEIRKQGFSSKVLQTTVPNRIFATLIFP  
PAVHLGYALEPQSQEAIMLPFAFKDFASWALSGKPSAIYQLPMTLSEASRD LASIQNIDRA  
ALSDALLAAGISLSMNAASLRDTVYASTAIAAPAGSPLGVLCTARNLAGMLASSKNSAAM  
VMETIPDKASDAIRNAAAALKQETAALRINPLQANGLRSVGPHSFIMFKGGLLDLVSSTP  
EGSKTLFQSTLPEFGLASTEVTQREFARFLAENPDWKPENKAVLIEKGLADSSYLKDFDL  
AAADNR PITGVS WYAANA YCQWLNRQAPAGYEVLPTEAMWEAAAAVSSRSISL GIFKN  
HASTGPLVGSAGTDSL SFSDFGNVWEWTS DGFRPYAWIQKDSSAFDELIG AISQKTVK  
GGSWANSPDQISIDSRGPVPAAHGSEFLGFRPALRKK\*

>SPBIB\_v1\_100056|ID:27162207| Signal peptidase I [Uncultured spirochete bib]

MKKTDFFDRLVAFSEFLTRRKQKSLRAKMKQKRHPVVDWIYAILWAACVVLVINQYLF  
QAYRIPSGSMEKTLVGMIFVDKLSYGPPELLPGVLKTPGVSKPERGKVIIFENPSYLSR  
GPLYTIFQQLYMTFTLVDIDREPTGEPRVHYLIKRAIGVGGDTIHVVNGEVYIKPRGS  
SEFMSEKSLMQGLGLAVKTQRLVSQSEYAEITNVGIASAYSELNLAFPASLGTSPVQSAN  
KDAFH YDMSRVTTLRDANPSEARNAQIAQRYENGWYIADSRVFPMDNRDNRDARYFGP  
VAEKKVLGHALFIYFPFSRMGSIR\*

>SPBIB\_v1\_100057|ID:27162208| protein of unknown function [Uncultured spirochete bib]  
MFARRPVRYAEKVERKKNRLRAIWFVVFIILSSFIRGVVIQSWQIRDQTMNPSLVVGDV  
VLAVPFWSIFSSAPFSFSGPLHQDGLVLIDDGASEVTPPALLTADAVLRFFTLQRFSILE  
AQYGRNFGVPEVMRIKSIIRENRENKRVLTYLEYDARRMSADAPADKEVQASRIRAKLV  
FRIWPIRRVGPLT\*

>SPBIB\_v1\_100058|ID:27162209| putative Oxygen-independent coproporphyrinogen-III oxidase-like protein YggW  
[Uncultured spirochete bib]

MSAEHFTDKKPFPTSLYVHIPFCAGRCAYCDFFSVPRGSCSPSTLASVSAVLEQAAEW  
TKIFEAGEFATIYIGGGTPTVLGTELLGTLVRGLEPYAANECEWTIEANPESLDEEAQVM  
LAETKVSRLSLGVQTLSONQWPILGRVGSVEDSLRAIELLGSSRFEVSVDLLAGIPYRAS  
DPAGAPEYIEAQLQLSLSALSGKVPHISMYDLTIEEGTVLQRRIVDGELVLPDSDLARA  
RESADGLLAAHGYYRVEVSNYALPGHECRHNLA YWNMDPYLGLGSGAVSTLAYPADAHQR  
MLGSMVRLNGTKNLKHFARPAEIPPEVEIIDKPTAAFEVLMMGFRTARGVDATRFSALF  
GIPILELIPSSLERWGGEIQKDNHIAIHPRNFDILNRFLVECFEEMDENRAMLKT\*

>SPBIB\_v1\_100059|ID:27162210| conserved protein of unknown function [Uncultured spirochete bib]  
MTLFQYAVVASILHDEKQKQELLSKFEQALIEAGGELQSVGTHTLCPRNTNLPLFIFVLT  
GGTEAEAMQLIQEKEMIEQGTVPVLLAHPFQNSLPAAMEILAKVKQDSGKGLILQADASG  
VFDAALGNIIAVSQSMRTLQASRIGVVGKPSDWLIASSQHPDIAKKA WGLTLIDIPFAE  
LMHDIEAIRAKPERAPDMPGLRAKAEFFSEADEADMRKSAEILQALKGIVARYRLTALTL  
RCFDLVLQDSSTGCLALSALADEGIDAGCEGDIPSIIALHWMRTLGMTGWMANPSRISI  
DKEKGTAAQALIAHCTAPRSILSSYGLRSHFESGLGVA VAGITPEGPVTLVRIGGKNLERV  
WFSNASVIGSPRQEGLCRTQALLELPEARAEELLTNPLGNHLMIRGDWIKRIEAFIRLW  
QS\*

>SPBIB\_v1\_100060|ID:27162211| Metallo-beta-lactamase domain protein [Uncultured spirochete bib]

MKIYQHYSIFGFSNSYMIGNEKLGKAIADVPAELTPTMIEKIEQNHFDLCAIFITHNHTH  
HIRGLSTIMKIYSPHIYASNAKILEFQCKKVRDGESFEEAGFSVRAIAVPGHSQDSIVYL  
VDESFLFTGDVLAHAGLIGKTSSTFNTNALAARIQKQLFSLPQETVIFPGHGPPSTIFSET  
RANISYQEGFAEHIKSNYDFFV\*

>SPBIB\_v1\_100061|ID:27162212| putative Pentapeptide repeat protein [Uncultured spirochete bib]

MFKVVPCSVEGCHRPSFSLETLCFDHLKND AERMRSLEELRSQTLIMNRVFDDATIMGM  
DFSRYRFVGC SFRNVKMHAMFTGASFHLSFLDGSEFISCDFSGTDIDFC SFGSSNFLDC  
SFENSELIQTNFNGSHFSDCTFSGSNLYNSRFMLCDLDTVNFDNCFKRAFYPAKESNV  
TFVGSNIAEAVRDLEHLYL\*

>SPBIB\_v1\_100062|ID:27162213| putative Glutamate racemase [Uncultured spirochete bib]

MQSNNDALHVCVFDSGIGGLPFLKAIHQEW RGVVTISYVADDAGFPYGTKSPEAIRDILFE  
RVRRIRARLDPDILVISCVTAVQIGLKDLQAAHRPMKIIGAIPPIAQAARETQSHRIAVL  
TTARAAEDAFLDDMIARDAPEIDVFRIPAQDLVDYVEQHL PFAEQESAEEAVEPYIAYAL  
EKGADRLVLASSHFV FLEEAI RHVITARGMDDVHCLDSREHVL SALRRFLFSEPAEEAAN  
EGGFYLTGDRKPCPSYIAWANRFGTAVPELL\*

>SPBIB\_v1\_100063|ID:27162214|rsgA| putative ribosome biogenesis GTPase RsgA [Uncultured spirochete bib]

VGTSMLGIVLSFSNHYARVRCEDNTVRLCTIKGKRIRSLDGWYNALAAGDRVSVQIISDG  
EGVIEKLLPRRVFGRFNEKGGADQAFANIDMVVCVTSANSPPFRPRFIDRVSVITEQC  
GVPLLILFNKIDLGSDEHAEARLSVFESLGYKVLRC SALLQOGLNALRESILGKTAVFVG  
QSGTGKSSIINVLMPGIDRKVA AISEKYNRGKHTTTLAELFFSPEGDIAVIDTPGFRRLA  
MRNIEPDDLSAYFPDMMPFIGKCAFGASCSTHESGCAIMDAVQNGIIHYDRYESYLIR  
SELESRQWKKEETGKFRKTPKFRLEDEEGW\*

>SPBIB\_v1\_100064|ID:27162215|mutS| Endonuclease MutS2 [Uncultured spirochete bib]

MVMHEHSLARLDFRRLRERLEGYCLSYEGRALMRNTLPCSNPESVRR LKRDLYLLSEGLR  
EREIPALPFPDL DVVVQKAKKEGLALDVELFALGIWATS YEQIVGLVRSILEASDRAKR  
AHQPEENVPM TAFDSSADTEEWAMLGIETA VFSAPSLALLRERIFAILTPEGEIRDLPRI  
RALKRAIHTA QLENQRLVSQYLSDPDLQDALQSNAATERDNRTVLAIKANFKGRVKGIVH  
EFSSTGQTVFIEPLELIERNRLLLELETRLNEEIRAILRETTEAIRPLVPSFERARQHLA  
AIDARLARAIQLRREDLVNATLLDEGLHLYQARHPLL GKKAVPIDVDVDPDGTRVLIITGP  
NTGGKTVSLKTIGLLALLNQY GAGIPALSTSGFAVFDTVFADIGDEQSIDQSLSTFSGHM

RVISDIVRAATGRSLVLLDELGAGTDPEEGCAIAMALLDFFLERKSLTIATTHHGILKNY  
GYTKPGCLNASMEFDAQSLSPTYRMCMPGIPGESRALEIARQTGLSDEIVATATSYLDDER  
TDYSALMRS LG EKQRELDRL EQEK RKQLKGAQESRRNADLQNLKVRQRELELRRQGVAEL  
NRLLESRRTFENLVREIRESGRKVEEASSAREFLNELSEEAKRENDEL SRFEAETKTLA  
RSLSDGNAPSRRIDPASASVGEKVL YAGREAIIVRKLDEKRVLIQAGSLRIPVAMEDLSI  
PPLHKKPDSETKLVYQVELSSPGE GSSKPLPEIDVRGMRLAQALET LAHQIDAASLGGLG  
VFSVIHGTGEGILGKGIHEWLKTQPSVADYYFARPEDGGFGKTWVHLKP\*

>SPBIB\_v1\_100065|ID:27162216|yebC| conserved hypothetical protein [Uncultured spirochete bib]  
MGTSETIKDLQLTPIYAAWYRYAAFLSAKGVFMSGH SKWATIKHKKGALDAKRGQLFTKL  
IKEISIAARMGGGDPEGNRLRTAVLKARAANMPKDNIDRAIKKGTGELEGTIYEELFYE  
AYAPGGGAMLIEVLTDNKNRAAAEIRNIVTRSGANLGTAGSVAYLFRKRGVLT YDGEKYT  
EDQILEAALDAGADDV V NEDGSIVVFTDPASFEDVLNAMNAKGFETLGAEISMV P DTYIS  
VDAETA AKIQRLIDKLEENEDVQNVYHNIEMPEIEE\*

>SPBIB\_v1\_100066|ID:27162217|ruvC| Crossover junction endodeoxyribonuclease RuvC [Uncultured spirochete bib]  
MAARRAIVAIGIDPGIAAVGFGVVRTREGSLELIAHGCIQTESSVPMGKRLAHIFNEIKR  
LLQQYAPDVGGIEELYFFRNVS SA FPVAEARGVIRLAFEEANIELMQHTPNAIKKSVTGS  
ARADKLQVQEMVRILLGMKEIPKPDHAADALAAICTLHSIGPAGYTL\*

>SPBIB\_v1\_100067|ID:27162218|ruvA| Holliday junction ATP-dependent DNA helicase RuvA [Uncultured spirochete bib]  
MFNRIRGILNGHADDALHVATGAIWEIFVPVRDPAFFSRV GEEIELYTWLHHYEDGMRL  
YGFISAPERQLFLDLQKVEGIGPRQAFKILQGIAPRALATMLDTS DLVSLQKIPGIGPKT  
AQKMMLALKGKLI ALEGEVGPAPAVQGRFRDVIRAL IEMGFDRREVERVVAQLGADVQQ  
GPESEKELFRKALLELSTGAGA\*

>SPBIB\_v1\_100068|ID:27162219|ruvB| ATP-dependent DNA helicase, component of RuvABC resolvasome [Uncultured spirochete bib]

MNSEIPDDESIIHSPMNPGYDPSEDEKEATLRPRYLSEFQGQERIKDNLLIFIRAARERA  
EALDHLFLMGPPGLGKTTLALVVASEMGVDFKPTSAPAIEKPKDLAGILT NLRPNAVLF I  
DEIHLKPAIEEMLYIAMEDFELDWVIGQGPAARTVRIPLPPFTLVGATTKAGMVSAPLS  
SRFGISLRFDYSAEELERVVRRSSRILDIKIDEDAVKLLAGTSRGT PRIANRLLRRMRD  
FAQVKGAGVITKDIVIDGLARLEVDFLGLERLDREILKAIILRFGGGPVGAETLAVSVSE  
SVESLEDY YEPYLIQIGMLARTPRGRIVTPAA YRHLGLEQMNENG\*

>SPBIB\_v1\_100069|ID:27162220|queA| S-adenosylmethionine:tRNA ribosyltransferase-isomerase [Uncultured spirochete bib]

MKTDDFN FELPERLIAQYPPEHRGESRLMVLDRATEKTFDAMVADIASFIEPGTLMIFND  
SRVRKARLYGICEQTGSHVEFVFLSPADEAEFDEQQFRGSDHAAQALNMPGSDKPVV PKH  
KLPSSQRWL VVCSKAKRQKIGRKYLFPGELAGTIISDRVDEKIIEFSAPIGDEYFDRYG  
HVPLPPYIKREDTKADEQRYQTVYAKRTGSAASPTAGLHFTPEILSSLRDRGIEIAHVTL  
HVGLGTFLPVRTENIEDHRMHEEWFEISPEIANRVNAAKKEGRAILAVGTTSLRALES AW  
YDGALHSGSYSTRIFIYPGF EFHVVDQLFTNFHTPKSTLLMLVSAFAGRERILEAYRS AI  
EKQYRFFSYGDAMLIR\*

>SPBIB\_v1\_100070|ID:27162221|tmk| Thymidylate kinase [Uncultured spirochete bib]

MHSINTDELK KRFIVIEGIDGAGTTTQMNL LAGSLRARGLS CVTTAEPTTSPIGMLIRSV  
LSGKNEAAPSTVAHLFAADRNEHLYGKEGIAQKVEEGALVISDRYV LSSLA YQGVTCGPE  
IPWQLNSRFPAPGLTLLFEVDPEVCIKRIDTRSNKEIYETLEFQKRVDHMYAVMADRLEQ  
QGWHIERINADGDIETVRQRIEAVVFAFLGVPSCGITGSASRLHS\*

>SPBIB\_v1\_100071|ID:27162222| exported protein of unknown function [Uncultured spirochete bib]

MRTKRPAIAIALISLLFAIYSTIVIVNLLRLEVQQA VGRSLDSVQSVVDQATGLSLDYDY  
LSIDAVNRFTMHGIRLV RKDAPDVSPVQVRSVSLRISY WALITGRSTEV LKEVSASDLQV  
DLVLPEDFIVQKLYKILFEGPLIVLPRFQLNIEPVHVHLKQNEPLADGTI HIESFQLST  
LGGFPEIVAPSISADLGGFFGLPKDLSSKIGIDGSLAADFSTFD FSVNISAGAPSVLLLP  
QQFVVSKRGSRIEARRRGKGLELVGWYEKGRWGLQGDMLGYRVSGDMEGKGEVWEVVKGV  
RGDGHIEAWGEGKVLGGYRVDVKGA VDEGVRWGKYALGGLAVVLKGE GDSAGYRGVVEGV  
HAGYGVRYEGEVGYASWAVKGSYTVSGAGVRV RGTVEGSGDRY GVEVAEGNVRGLVLGEG  
AGQVKLTGEGYEVGYRGGV GAGRVSGEGSIGKDG GFEGVVEVEKVDVASVVAATGLKLQG

VEGVVSGRVYGLVRGGKVSALNGGEYEGRVQGVGVKVGLEGVGDEAGYTLKRAQGVVGG  
IAVGLEGKGMVYRGEVFRGQVTVGGIGYGVQVGVKEGEVGTITVGDTAEGKVVFGGSRIEQ  
VRLKGFVGVGGGVVWLKGGARGWYEKDAWGLELTVNGVRYEYEGEVYPQLEVSGTVDAKG  
AKLTIDYFEYNARKLKGELTITYASIESIIRDFDASYTLSSIDYERAKIEGTIKSKDGII  
DAAITANALPIEQFIPSSLKIAGDLQLKGGKASASLNGDKFSLANFSLLEVQFKMQKGEIN  
GLPFSASGTADLKDSVLSIKDGSFAYLNHKIDAISANYDIKSGSAHFQAQVRSVIAEKL  
TAYFNGDGKIAQDNPNWDLQFSGQIAKAIYNSRNIDDIGYVAAFKNGNIDLNLNANGSN  
AHASITSMSEFEVSLNFFKLTGTAKGSVKENAVEADVSLNKFDLAALQMFIPENYIKDM  
SGSASCSLKISGDLNDPAIDGNIALKAVSFSSNIYLLKVGPFADMKVSEGIIELGPAI  
IKVGTESISLAATASLSRWEIGDIKAFISTQETAALRFKGTIAGLTAKDIRAKTDLTATL  
SQSGLEIKGNIFLDNGTLEVNPAAGFVVSPEAKATVPLSLNIALTLGKNVELYLPQDFP  
LVSGMSSPNSALNILYDQASGAFSVTGKVELRSGYVLYLLRNFFIKQCTIEFSENQTKFN  
PLINAVAEARESSKDGMIIVTSLADQTPFENFKPKLSSIPPKSEIELLALLGGGLALSET  
SDNNPLTIREAMIASSEFLTQNSLFRSFEQRVQKALGLDVLVYVRSSFIQKWLLDITGQST  
KGLANYLSGTELVFGKYITDSAFAHFILRMAQNPLEETGVLQLDSELGLEFQSPFGLLEW  
GLSFGKEGTPLNNQKISLSWRINY\*

>SPBIB\_v1\_100072|ID:27162223| Outer membrane protein assembly complex, YaeT protein [Uncultured spirochete bib]

MRLHRALFAALILFFAFQTTMAQDTPDEWFWNKPIAGFQWEGLHYANRNDLDSMLRSYID  
VAFTDTVWTDIQAALYALDWFDSEIPVALPAGDSKDKVIVKFIIVTEKPSISSIRIIGNSA  
LRTSELLDAASSKNGAIFNADKAKSDTVAMQKLYLEKGYPDAKVEFETAPSPQDASRIIL  
TFKVEEGTAVIVRKILFSGNSVVSQAQTLKSQVTLKEAGLFQKGAQFQESKLAESRSAIEDY  
YSSKGYVDAKVVDILRTYTKKEKTSKNYLDITFVISEGKQWVFSGVSFDFGNTIFSTERLS  
SFISLKPGDPLNLKRLSDKQKIDDLYESGYIFNSISMSQTRDEQAGSISFKISIIERD  
RAHIGSISFKGNTKTKDYVIAREIPLEVGEVFSKTKIIDGLRNLNLQYFSSIDPEIHQ  
SVENLMDLVINVEEMSTAQIQFGLTLTGLGQSNTFPISGFVKWNDSNLGGTGKNLQVNMT  
LSPDEQSLDTSFGQNWLLNKRISQSLSFTIKHAMSQTAQDSIAPFSSDIPDPYTALGS  
GANEWNGLLSSVPDNYLMKYDDYTFSLGYSYLYVYKIPRGDIGLSGGVSSGLGMSSYDAS  
KYRPEKEMRDYNGQWILKNSIFGRVYLNRLDYWYNPVGKGYFLSQRFTYTGFSLNERQFY  
IRSDTKAELYATLFSIPFSPSWVFSPPVGLHSGVQTLAQPWTPSVTKDWVYLDGTFSV  
RGWKSLYGSKGTLVWENWLELHLPVQVVS LDGFLDAGAMQTQNGWVNMALDSPAEGE  
WNLQWKHFVAFSTGLGVRVIAQFPFRFYFAKRFVFDGSAVTWKTAAGSDFVLSITQPLY

\*

>SPBIB\_v1\_100073|ID:27162224|mutS| DNA mismatch repair protein MutS [Uncultured spirochete bib]

MPESSMTLEQYRRIKSQHRGEILFFRLGDFYEMFNEDAQEASSILDLTLTKRQGQPMCGI  
PYHAAKTYIARLLKAGKKVAICEQKTIQGRRLMDRDVVEVITPGTVVEDDFLEQSANNY  
LADICLLHGRLCFAYLDVSTGEFRAHSLPFDDRSKEVLRAELYRLSPRELLVQQSLDQA  
NFLQVIRESAAMIEPQPDWYDVFHSAFMLKRRFGVASLKGFGFEDNDPALAAAGNLLEY  
VQEMVHQSCPHIRAILRFEQKDYVLLDEATKRNLVKNLSDSSRRDTLIEILDKTKTAG  
GARMLRQWLFQPLRNKARIEARHEAVSFLYHNQILLGDARKILASVLDVERLISRLAMDK  
AHAKDLRALRDSVEAGLALFQLIEAEHPPMALIPRVS AEDKAECNQVIATIDSAIQDDPS  
VLLTEGGIIRDGYNSELDELRLNLHNAQAVLESYLEEEKQHTGIQNLRIYNRVIGYYLE  
VTKGKLSNVPSHFIRQSLVGGERYTTDRLAELESKINGAQERIIIELEKRLFLEVRENK  
GNVAALLECAHAISEIDCLASLAQAATENGYTRPVMCEEPVIDIVNGRHPVEMCLPYGD  
FVPNSISLSRDNQWFALITGPNMAGKSTILRQTALIVLLAHMGSFVPAEAARIGLVKIF  
CRVGAQDNLARGESTFLVEMHEAAFILNTATANSLVIMDEVGRGTGLDGVSIWAVSEY  
LVERVGCRTLFATHYHELTTMGLSGLRNMRMAVIEHDGTVSFPKRLEDGASSGSYGIHVA  
RLAGLPDGVISRASEIEQHFHQLERGLGQEQQVEENDA VPGRIPAYSFSPKPSKEAYIP  
DAESKKEKRAQMRRTGELFSPEDLVSELRSINPNEITPLGALQILSELVEKLLKQ\*

>SPBIB\_v1\_100074|ID:27162225| conserved protein of unknown function [Uncultured spirochete bib]

MGMRFHFCVADCVD AIFPVRVLCGSLVSKSPWWPAPLCTSC EKTLECIGGLRCERCGRP  
LISEQGLCAQCKNEQYILMHILPVFAYKGNAA RL VQCYKIEERASLAKYFSLRLAEMVPL  
FAETSSDIAIVPVRPEKIWAGKFDQV GILANYLSRYGYRIWKGLVRRKGGAEQKTLAR  
ADRLKNA YQSYMLRAGSMDIPEKALLLDDVCTTGSTLDACAEILAGKGTTLGAVLAAD

\*

>SPBIB\_v1\_100075|ID:27162226| putative Ribosome maturation factor RimP [Uncultured spirochete bib]  
MVEMNGKELEKEIDDLLRAAGLDLLEFSVTRHRGKTHVRAVIYSREGTGTDECAKAHRLI  
LPRVQMRLGDQEPYIEVFSPGIDRIIRTEREWQAFTGSIYIMILTSVPEWRKGRLLVNFVK  
GVVQIEMNETVVDIPIASIQKAKLDSSEHEGKTHGI\*

>SPBIB\_v1\_100076|ID:27162227|nusA| Transcription termination/antitermination protein NusA [Uncultured spirochete bib]

MASEMAEAIKQLISEKGIPEELIKTLEDSILAAAYKKKFGTSENAIIRFKENYEGIEIYA  
KKTIVSDDDFEDEVLEIPLEEARLAEAEIGDILEIPVDPSEDFQSVMLAKQTARQSL  
RDISRDTLYAEFKSKVGEIIIIGYYQRRNGTIFVDLKGVEGIFPRKYQSPRESYHVGDR  
KALIVEVEKTKTGFQVLSRTHAEFVRKLLLEIPEIYDKTIEIFKIVREPGYRTKVAVY  
TKRTDIDPVGACVGPKGMRSQLISQELEGEKIDFIRYDINPKEFIRNALAPAQIKEVYIV  
DDARHMALAVVEEHLSIAIGKSGQNVKLANRLCDWNIDVMTEEQYLQDSRNVELKKAAD  
SLFSAEEEEQGEELLLKDLPGMKPEWILALESAGIQSIEQFLEAESEMPQRTSIAAEDLA  
RIREIIEENVEIVQEEAEEEEETEAYSCPECGAPITMDMDHCPSCGVALSFEVDEGRDE\*

>SPBIB\_v1\_100077|ID:27162228|infB| translation initiation factor IF-2 [Uncultured spirochete bib]  
MTDSTDKDPKKVHLIKQAKQASQEQPIEPVAAPQPDQGTEKKKVVVVVKKKVVTAKKVQA  
KVISPAGSAQGGAEETNKEPAASASAQVEAHAKLEIARPTPESSAHIAHSHKQEPGVS  
GAVASLATQESSGKSEESSAEKKAETKPDAPRSPAHTSPSQSHRPDSSYNPQRRYSSD  
GRAGNLAQGRPAPTSRYNQDRNESRPPAGTYPTRTSYGQQPSRSYPSTQTRPGQGPSAY  
NRGPRPSGGSQYPGSSQYPGAPGGANRGYPSARSGQKPGSRPGGYAGSRPSGAGGYGGS  
PGGSGGYGARPAPAPAGENRPTSTRRQPAKKKGTGFKREEEIELEKQIQLKKKAEAKLAAV  
PKSVDIMENISISDLAKKMNLPADLISKLMSLGVMATINQKIDADTAAILAAEYGCVR  
VVSLYDETVIEKAADKPEELKPRPIVTVMGHVDHGKTKLLDAIRKTDVVSQEFGGITQH  
IGAYMVDTPRGKISFLDTPGHAFTKMRARGANLTDIVILVVSAREGVMPTKEAIDHAK  
AADVPIIVAINKIDLPEANPDRVKTQLSELGLIPEEWGGTTQFVEVSALQKKGIPELFA  
ILLQAEMLDLKANFDRLAEGKVIESRIDQGRGIVSSIMIQNGTLRIGDPFVAGIYPGKVR  
ALFDDKQQRVEEATPAMPVEVLGFEGMPEAGDPFEAVEDEKFAHQISAKRQELKKYEEGR  
NVKKVTLNLYETISQGEIKELKVIKGDVHGSVEALKGMLEKLTSEVHLNVIRAAAGA  
ITEDDVMMASASNAIIIGFNVNRPPTSAKQLAEREKVDVRKYNIYRAQEEIKLAMEGLLA  
PELKEQEVGKAEVRSIFRVPKVGIVAGCQVTEGIVKRNCQVRVIRDNIEIFQGSLSLKR  
FKDDVKEVAAGYECGIGIENCNDLQEGDILEFYETVEVARTLESNNNGSDTKASS\*

>SPBIB\_v1\_100078|ID:27162229|rbfA| Ribosome-binding factor A [Uncultured spirochete bib]  
MDQIRRRRLEELIREEISRMITFGEIKDPRVNSFLSVTRVEAAQDGSHAKVWVSSLEDEE  
SRLDEAITGLSHAAGFIQALLAKRVRLRLTPVLTFFPDRGIKEGFEISEKLDLLK\*

>SPBIB\_v1\_100079|ID:27162230| tRNA pseudouridine synthase B (fragment) [Uncultured spirochete bib]  
MSCSGFFLVDPKAGPTSNRVLQEIKRAFASKAYPTLNVKFGHAGTLDSEFASGLLIVLTGKC  
TRLTPWFMHQTKYEAVFRFGEETDLDPLGRIIGHAELPSKDMLEQAIPRFQGDILQIP  
PSYSAVHIGGKRSYKIARDGETPDLAPRPVMIEALRMHSYDGEAAHFSIRCSSGTIYRAL  
ARDIAQACGSRAVFKSLRRTRIGPFAVDAALRPDMCSAKTMMHFTSEVAISLGLGAGLLN  
PAYFDRFLHGSDDLPLSAIESRGKALDLFAGRSLADSPLALFSQSDAFLGIVQKSESGWAV  
KVMAADEAKE\*

>SPBIB\_v1\_100080|ID:27162231| putative riboflavin biosynthesis protein [Uncultured spirochete bib]  
MKVLTWQDFLENVPHARIAATVGVFDGLHLGHQALIETVRKEAPQLKPCVITFRENPKKI  
LHPASYRGSLLTTEQKLSAIEASGIEYCVLIDFSGKFATLSGREFLAALYVANVRFVAVG  
ENFQFGHRLDTNAVKLEVLSEEIGLRPAIVKNVMYRGHPVSSSRIRHAVQEGRLEEADM  
LGRPYQIIVQRGAEPGVMVAEDDLLLPPDGEYEGIANDGGAMQYCRVEIDHRNLKFLGLRM  
QSEVVRFAFVDTATQEKENLVWL\*

>SPBIB\_v1\_100081|ID:27162232|rpsO| 30S ribosomal subunit protein S15 [Uncultured spirochete bib]  
MALSKEDKAQVVLEYGKDPKNTGAIETQIALISSRISYLTEHFKTHKKDTNSRRGLLKL  
GQRRKLLKYLQRTNLESYREIVEKLQIRK\*

>SPBIB\_v1\_100082|ID:27162233|pnp| polynucleotide phosphorylase/polyadenylase [Uncultured spirochete bib]  
MINKLECQIGNETLVFETGRMAKQANGAVFATYGGSAIATACCSSTPTEGLDFVPLTVE  
YSEKYYAAGKIPGGFIKRETRPKDREILVSRIIDRPMRPLFHKEFGREIQVVPTCISADQ

INPPDVIAANAASAAVHISDIPFEGPIGCVRVVALVDGKYIVNPTYEQIEHAKLEIVVAGT  
AKGITMVEGGSHEASEEEMIEAIETAKEPIARICATIEELKHLAGKEKLPLAPLQVELNN  
KEEIRAYAHHELLSKALFTKVKQERAKAVAQAIAAVKDKFKDALTDIQAQKLFKLMDDLQ  
YEILRSSILDKQLRVDGRGLEDIRPITCEVGVLPRTGHS AIFTRGETQVLA VTTLGTVFD  
EQIFDDIEGDRRERFMLHYNFPFVSVEVGRGTGRREIGHGDLARRAIEPMLPPKDKFP  
YTVRVVAEVLNNGSSSMATVCSSSMSLMHAGVPVAKPVAGIAMGLITDETRYAVLSDIL  
GDEDHLGDMDFKVAGTKEGITGFQMDIKISSVSTEILRKALEQARRGRLHILSIMEKTIS  
APQSEISPFAPQVISARIDPEKIGLVIGPSGKNIKALSEKYDVQINIEEDGSVTVYGKDQ  
KSAFNARDAILGMVEEPEVGKIYIGTVKRIMDFGAFIEIIPGREGLCHISRLAKGHVEKV  
SDILKEGDTIQVKLMEIDHLGRLNLAIDSLENGEARERPARSDSRSSDRPRDSRPSRR  
DFHRDR\*

>SPBIB\_v1\_100083|ID:27162234| putative Peptidase, M16 family [Uncultured spirochete bib]  
MPLLLKSAAGTMLAADSMPNASSVSIGLWLPYGSRNEKPQNRGFFHFIEHMFVKGTISK  
AQALARTFERTGGFVNAFTERSTTCFHCTIPAKWKYACTTLLEMAFLSIFPEDEFEKEK  
IVILSEILQTEDDPEELAHHEFFRLFWKDQPIGLPIAGELADIQTISREKLFSFYLEQFK  
PEISFISIAGAIDENEAARFVEAELTRITSLRQKLFGTIGLAAENCEIIPVSAVPHIFS  
AYEKNHASLSYVIQCMQVPPPQNVRRYLLNALMNEIIGGSTISRLFQSLREKEGLCYTVF  
SSFETETLEALWIIHLQTGGKQLTRALDVLDDDEVKLSKGYPSAMEFEDARSRVAGLLQL  
ASEDTDFRQRRMARSYFAHGTTEGIEQELALVQSIYDEVCSAASDFGSLNRARFVFGTA  
KEKELLKRGYLEHE\*

>SPBIB\_v1\_100084|ID:27162235|dut| Deoxyuridine 5'-triphosphate nucleotidohydrolase [Uncultured spirochete bib]  
MSDSFAKQIEVSISLSGNAQMPNYATAQSAGADLCASLSEPVVIQPFARALIPTGVRIAL  
PEGYEAQVRPRSGLAFKHGVSLNTPGTIDADYRGEIQVLLINLGDKPFTVTNGDRIAQL  
VIAPCSRARFSQVAHLDETGRGTGGFGSTGL\*

>SPBIB\_v1\_100085|ID:27162236| putative Permease YjgP/YjgQ family protein [Uncultured spirochete bib]  
MKEKPPLTFWRMMFSEMMLSFLAFFFFFFIVFLINQVLLFAEDILSRGADLVSVAKLLFY  
SLPTIIAIVPFSVLAATLMTSSRQHADNEFLASSTLGIPLWIYIPFLIVGLGIAVGSF  
YANDWFIPRAANGFKTVYAELIRKSAKVELSPYTISKYGDKLLVTGASNAALIQNLLIVD  
QKQGADANVVTADDVSIQSDSMDAILKMNNITEEKKLPGGEPGDFSMTTARQGDRIQ  
IREQIPSYSSSTAPSEMSIASLARQIREKESRLASRLREKESQKATALDRLRLSYAQSSAA  
SSALASFKSLASQKTEDTSLQIYRLEYQKKFVIPSACFFFAFLAFLPLGIGSRRAGRTAGF  
GLALLLAVIYWALLFAGQTFGYRQGFDPALSMWMPNFVMFAAACLIWISRKI FTGHFL\*

>SPBIB\_v1\_100086|ID:27162237| conserved membrane protein of unknown function [Uncultured spirochete bib]  
MNEELVKSRFASLDLSQGPQKPFLLWKELTSKVLLWTAGGTLFSLVISLAELFSMLWKF  
LARNASFIDILKWIGFGIPKHIVDAAPVAFLFAIVFILSEWHANNELEAVFSAGISLQRF  
VLPLLVSVLLCATEYFVTDQIAIPFLRERSTLQSGILRESDSRYAVPALMADKGGKVVY  
YRFYDEKKGRIYDISVIERDDSGALLRKISAKYASFENELWVFSDAIYKKS RDVWEFAE  
APRFSDFAFDEPPASFMRPTMDVRFMNAELNGHIAFLKSAGLPAEDAEVEQQRRISFAF  
TPLVVVGLAAAFAGRFRKSIFLLSLLSSSATLYYVAQMLASLA AKARMSSAGLAIWSV  
MLLFAAASTVSYFKART\*

>SPBIB\_v1\_100087|ID:27162238|tgt| Queuine tRNA-ribosyltransferase [Uncultured spirochete bib]  
MANSIFIEKHRDPSCRARTGTLFLPHGEVETPTFMPVGTNATVKA VEPADLDAMGFNIIL  
ANTYHLFLRPGPDIIAKAGGLHGFSGWKKNFLTDSGGFQVFSLSQFRKILQEGVHFKSHI  
DGSSHVLTPEKVVDVQVAFNSDIQMALDICAPWGETEKKAFFRAAMLTYDWAKRAKSQWIM  
HRENGYQGNLFGIVQGNFYEELRKL SAEQISELDLPGIAIGGLSIGEPKEAYIEYLELTS  
ALLPLDKPHYLMGIGTPDYIIEAVRNGIDIFDCVYPTRTARNGLLFTSKGQITIKKAIKF  
EDFSPIDPECSCHVCKTYSRAYLHHLFRNNEILYSMLASQHNHFTAD FVGKIRRAIEQD  
RFEAFARAFMSGYSEAAAAAE\*

>SPBIB\_v1\_100088|ID:27162239| Transcription elongation factor [Uncultured spirochete bib]  
MAESPLNEKLQMLNEEKWTRTLMANYSVASLKELDRLVEDAVQQGVTDIIKTCTDHLS  
QTKNSVIALYVAGILNIMRQPADES YLVQLMDL FADSKKT NIVEYICNRMLDYGENRIAL  
MRLAECYAEDEKIEQRYAVWERLVRIDTEEAELAQLIAEWKEKNGRTEE AIDFYKKALIR  
YINKSLFANIKDIWLKLDLSPEDLDFLHAQKKIAKQISPEKAAMLLMDLYAWYKKNEK  
WETALDILKLSIEYDERNPALRKEFLDCYTAIYSGHSMFDECVRLSNLTQTYRSLHEAIA



DFEKRIAFDKGNFVFHRTWSIGRISNVTNDEIVIDFSKSRNHHMSLKMFGDSLTTLSKDH  
IWVLKATWPKEKLRDKVKADPAWAIKVIKSFNDRADMKRIKAELVPSILSTSEWNSWSS  
RAKEILKTDPMFGNASDDISTFIVRDRPLSFEEKIYAQFKAENFFARAQYFRDYIEMSD  
IDSDYFEDMLS YFV SFLKIGQVNEYVVGSYLLKELSTRYPRLQQHVTIRFPDLFAQIKD  
SIVPIYLGLKDTTELKNQFIQNIKTLPNWPDIYIQLLPYARSNKMLEALENADQEEKLKR  
LAMYIVENYKDMREAFIWLAKDLKDKPWLKELGIVREKILTLHILDITFKEIDSHKDT  
TENRKINKLVQNILFKEKDLEEFLEDAPQQVTERVYSMLADIKEVDP AIKLNKIKKIGER  
FPDIKFYDGNERTVSHGLMVTASKYEEKKRLLSHIMEIDVPANQKEIAFALSLGDLREN  
AEYKAAKEKQDELNSKVGKLNELDRAQIIGPEHVDTTISFGTKVTLKNLASGQEELFT  
ILGPWESDPEKQVISYLSPLGKHELLNHKVGETLNFTINERKFSYKVLKITKAEF\*

>SPBIB\_v1\_100089|ID:27162240| Tetratricopeptide TPR\_2 repeat-containing protein [Uncultured spirochete bib]  
MAIQPQIKNASAASDLLIAYESLKNADIQSADFLERALKTDFEHPEVLFAMKCMQFWKE  
QLLNMPDTKNLLDRGDFLCASWKKFMVFLGHIGESFETTRYAFKRIFIGLALDQYLALPD  
EQKESLGAIDLRLGRSRKATGDIETAIVHLERAAQSQRNDAAILSELADAYAMAGEARL  
SKALFREAFFIDPQAVEIDFLESEFILKIIENVRNLGYSNDIAEWIPVYAEIWGVFNLK  
RELSTAEYNRISASARQIEIELRESPQRSSLLPRLNRYFWMADYLKAQGDEAGWHSVS  
LKIKILDQSIHALYVG\*

>SPBIB\_v1\_100090|ID:27162241|rpe| Ribulose-phosphate 3-epimerase [Uncultured spirochete bib]  
VKIGLAKAADLHYSVDCMKMPIIAPSILSADFLEIGA AVESIESSGAEWLHLDVMDGHFV  
PPITFGNKMVSDIRKRTGLFLDTHLMIEEPERHIHAFLDAGSDAITFHAEACIHSRLLQ  
TIRHSGKKAGISIVPSTPVSQILPLLQAVDQVLVMTVNPYGGQKLLPFCLSKVDEL RDI  
RKKEGLDFLIAVDGGTNLSTISQVAIHEPDILVIGSAFFAAQDKQAFACSIRSAWNE\*

>SPBIB\_v1\_100091|ID:27162242| exported protein of unknown function [Uncultured spirochete bib]  
MKKYILGLLLLLAGISLSLHAQGNDEIFAKFSSAFDLFKKENFQKAGSEFALLYETWSES  
SLASDSCFMAAQSYFNAGDYPTSYLYCVQFIQNYSDHPNIPDMKFQLGRIFFKTGRFKDA  
IIAFDDFLKAYPGSPLFASALFWKAESYYQLGDIARSFPLFNLKEKWPDSKASL VSWR  
LNVMGLEAREAKFSRLMAYETEKAAQMEIGGMQKEALQEQQYIRVYYLLKTLRVRNELPG  
SSKLPYVQYTPQNAPEVDSNLKSRLNKLNVLLEAKKRILELLAKIDAYMREISP\*

>SPBIB\_v1\_100092|ID:27162243| exported protein of unknown function [Uncultured spirochete bib]  
MKRSFALLAVIFCFTSAATALDLRSGLVRIATDDLTLRPLYRLVDIAGKKKYEPIWYSD  
DPRTSFIVINVDGRIYRMGSSQEYQTSQKQIANGIEIEYRSIINRVTQRIQFASLAGSRV  
ANGFLVEIEVENFTSRDMKIMLKEVC DTWLGEKSGNHIALASNPKVIDEMYLTPDSQEPY  
IVSPGEYASVALLFDSEPRPDAVVIANWKRLSDSMFAYDSSLMRGFTLSPYSINDSALGL  
YWNERIVPAKGVIKVSSRWLTGGPGNEFLAWLADNYPPKAEQQTTEAQQNSTEQMSLPAL  
DVEAIRSLLARIDSAIQNV DVLSD EDLQILSELDSLEQGVANPIPQN\*

>SPBIB\_v1\_100093|ID:27162244|dtd| D-tyrosyl-tRNA(Tyr) deacylase [Uncultured spirochete bib]  
MRAVIQRVSEASVTMQPEDNSGERLCGRISNGILVYLG VGVDDTDEDASYLAEKIAHLRI  
FMDQQQKMNL SVLDLGYEALVISQFTLYADSRKGRRPSYSQAAEPARARYLYELFCKKLR  
NQGLHVQTMGFQEIMRVRYTNEG PVTILLDTKN\*

>SPBIB\_v1\_100094|ID:27162245|ppdK| Pyruvate, phosphate dikinase [Uncultured spirochete bib]  
MPKKKFVYSFGAGVAEGDGMKELLGGKGAGLHEMTKIGLPVPAGFTITTEVCDLFFKSG  
KKWPEGLEKEVQKHLKQLEKTTGKTLGDPRDPLLVSVRSGAPVSMPGMMETILNLGLTDA  
SVEGLAAKTGNRRFALDAYRRFIMMYGSTAMGIEREEFDKAFDEIKAKRTRARLGIPADQ  
KVNDTDVNEEELDELKMFKKIYREHIKVDFFQDPWEQLKG AIDAVFNSWMADKAVTYRK  
VEKLVGIKGTAVNVVQMVFGNKGETSGTGVCFTDRPNSENVFYGDYLVNAQGEDVVAGI  
RTPIRLAELDKRDPKVYKQLVDIRRKLEKHYRDMQDLEFTVEEGKLYMLQCRTGKRSPIA  
AFRIAVDMVKEGLISKEEAILRIKASDIEGIFYPMIDKSKPEELKKAFLVQGIDAVPGAA  
TGKVVFNADAEWAAGKEKVILVRKETSPELVGGMHAAQGILTATGGKTSHAAVVARGW  
GKTCIVGCEKLDIDYEKGIFAVGETVIKEGDYITLDGGTGNVYKQQLKLVKPEPPKAYTT  
LMSWVDKIRTLKVRTNADTPYDAEKARQLGAEGIGLCRTEHMFDFSEERILAIREMIAD  
DLESRKKALAKLLPFQTKDFEGIFKAMDGLPVTIRLIDPPLHEFVPHDEEGQRALAKAVG  
VSFEKVVQRVEQLHEANPMLGHRGCRLAITYPEILDMQVTAIITAACNMTKKGIKVLPEI  
MIPLVIDDKELKILETRTREVADAIKSGIKLSYMGVTMIEVPRAALLADRIATVAEFF  
SFGTNDLTQMTLGLSRDDAGKFLPDYVDEK KAGVFKADPFQSLDQDGVGMLIRMGIEKGR

SVRPKLKVGICGEHGGDPASVKFCHRVMNYVSSSPFRVPISRLAAAQAVVEETASAKKP  
GKNRGRPAKKASAVAPKKTSTRGRKPASAVRAVSASSAASAAPKRRGRPLGSKNKNK\*  
>SPBIB\_v1\_100095|ID:27162246| exported protein of unknown function [Uncultured spirochete bib]  
MSRIPGVAKAFLFAAVISIMLASCIGIEAATKMDAKGSGTLSMEYQISNEFAQIGALET  
PSLPLPLSREDIEKSLQRIEGVHLKSYSQNSRANNIISFTLLFDSPSHLAYYLDPAGKF  
VQYSQEDGISHLKLTLGDAIQPLDKQMKDALYEKVKPYNFKFTFEASQAAPPEISMQNADF  
FKTATSGKKVTLESSMADLLTSVEPPRIDISWR\*  
>SPBIB\_v1\_100096|ID:27162247| conserved protein of unknown function [Uncultured spirochete bib]  
MLRMVLRLEASTIKDKRRVVLAIKEKLQHRYKLSCAEVDLLDSVMFAEIGAALVSNPQ  
HGETVLRDAVTFVEDHYPVELYDVQTHYEIFG\*  
>SPBIB\_v1\_100097|ID:27162248|metG| Methionine--tRNA ligase [Uncultured spirochete bib]  
MKRRLITSALPYVNNVPHLGNLIQVLSADVFAFCRLRGYETLYVCGTDEYGTATETKAL  
EENLSPRELCDFHALHRDIYSWFEIAFDTFGRSTSPDHTEVTQSFIFLDLDRNGYITSQS  
IEQLYCDSCRFLADRYVRGTCPCYCYEGARGDQCEMCGKLLDPMELINPKCATCGATPK  
PRTTTHLYIDLPAILPKLEAWMKEASIKGFWANNAIQMTQAWIRDGLHPRAITRDLKWGI  
PVPKKGYEDKVFYVWFDAPIGYISMTVSLAKEKNFDWKSWWQNPDKVELFQFIGKDNIPF  
HTVIFPSSLLGSGKPWTMLHHMSSTEYLNYEAGKFSKSKGIGVFGTDAMETGISADVWRF  
YIFWNRPETS DYTFTWADFQEKVNGELIGNLGNLVNRTLTFVSRYYNGVIPEGEPDAAFW  
KEVLKLEENVAEHLERAELRDAFRSIFAISDLANKRFQDEAPWKARVEEPAKAASLMRDL  
CYVLKDLAIMTYPYMPKAAENLAGFLGLSFGAQGLSWRELGPAGLPGTVRKPEMLFQKLE  
DDLISALRERYSGSQKERQERDAQENAEGPGVQGPAAPPSAPPSEPPEQRFFKLVDLRVA  
KIVKIERHPKADKLYIETLDDGSGKERTIVSGLVPFYKEDELLGKNIVLVNMLKPAKLRG  
VESAGMLLAASVSAPDGTESVEVLAAPNASPGDRVILEKTEGEPASSEIPSAIIDVDAFF  
SIPIVAKDGS AWVGTKRLVNGEPIALRRVLNGEIG\*  
>SPBIB\_v1\_100098|ID:27162249| Methicillin resistance protein [Uncultured spirochete bib]  
MNVLPHVAFPTISSASDCIPEFEYSSFLQSKFWGLFKARTGWQAYSCSYDFEDDGPHGNL  
LVLRRIA KFLSFLYVPHGGGELSRLPDRWNALSMLGRALSES MGKSDAFVRFDLPWERM  
LDEKTEFELTS GPTGSKRLILHKGTDVQVADTVVLDLAKSTEELLSGMKPKWRYNIRLSE  
KKGIVTKHKGKEGLPLFMKLYEETAKRDKIAIHPESSYYATLFDTVLEVSDLMKEQGIPQQ  
DRPILSLYIAHHESDALAGIIVLKHGPVATYMYGASSNLKRNMPAYALQWHAIQESKEQ  
GARMYDFFGIPPQGDASHAMSGLYLFTKTFGGKIIHRYGAWDVPIHPWLYAIFRSAEKM  
RAFWHKKVKK SIRKISPTASAAHPSAGERDDSEKTNPSNP\*  
>SPBIB\_v1\_100099|ID:27162250| conserved protein of unknown function [Uncultured spirochete bib]  
MKFSIDIDDQKALLKYARKVIQA ALEHEPEPEPPELSTTLRCGAFVTLREDASLRGCIGR  
MQSNDPLARTIAEMALAAAFEDPRFTSVAAEELPRLEIEITLLSPLKPILPEQVVVGKHG  
LLISALGRSGVLLPQVPTEY GWDRETFLEQLCRKAGLAAGTWKSSLAQLYGFEGFVFS  
SLSPAEG\*  
>SPBIB\_v1\_100100|ID:27162251| putative MEMO1 family protein Asulf\_00361 [Uncultured spirochete bib]  
MHTDKLIRSALLPGIFYPADPEQLKSEVRMLAMQTEQMPHSGCAIISPHGSFRYSGLLAA  
KAWGSLVGANPSIILAGPAHLPYEEGVFLPESSQFDIPGAVLNVDVSFAEYLLARIPEL  
KKNDLVHLEEHSIEMQLPFAEHFFPGVPILPFIVSGRDEKTVATVEQLFEEIRVCVENQG  
VLILSSDLAVSNTPEECDKLSNEFIAALSCGSTASFS AHDVSRHSFCGEPAIRAFRHAYP  
ESKSRLAYANSAPFREGSDEL VVGYGAISSFR\*  
>SPBIB\_v1\_100101|ID:27162252| conserved protein of unknown function [Uncultured spirochete bib]  
MRISRILIWYRMESVIQALLYEEKMLHNRLQRLNECASRPKGS IILKRRFHMVYAYLQW  
REGEKVVSRYLGKSDSWKCRSMQAKIERRKYE QEMREVQNKLKKIHHLLLEEAKKLG\*  
>SPBIB\_v1\_100102|ID:27162253| putative galactokinase (Galactose kinase) [Uncultured spirochete bib]  
MNSMKDIFAIHLSEYETAPDCTVAAPAIVKILGEHTDFTDGLVLA AALSFEV RVAVSFRK  
DNSLRFYAGDFNERKRANIATLKYKREDRWANHIKSICDYFLRVFELEPKGLNVTIQSSV  
PLGLGLGISSSLNMAAAFIFKTIYNLDIKPDELA AHACKAQSVFFEKDFPITNYLAITAP  
AGRSFSVVDLRTRKRRGIQFLPEPWEMVLTDSKVPRLSVEAELEQRTSDCNA CLSVLTPR  
GNRSIRDIAPRELDELLGIVPERKRRRCLHVLEEVRVSEAEDALARQDYAGFARIVNKS  
HASLRSLYEISCP EIDWLAKRALELDGVLC SRLVGQGFGGSTLTILNNDVKEAYRHRLEE  
YERIFGFRPVVYEVSPGSGLRILEH\*

>SPBIB\_v1\_100103|ID:27162254|surE| 5'-nucleotidase SurE [Uncultured spirochete bib]  
MRILLTNDGDIQSDGLFALVDSLGLSKNDRGEQLHEIWVVAPEHERSGVSHAMTLKKPTK  
LRKLGEHRYSCSGTPADCVIVAGLGLVHEAPDVVISGINKGPNLGTDIISGTCTCGAARQA  
ALEGIPAIAVSCASFGDNLEYGGLTSFVASNLEKLIALWKPDSFININGPSTSTCTDLCAV  
WANPGKNRYLDNLKCFDGADGYTYCFLAEGRQERTPDIYSDHHA VSQGFIALSLVEIHPR  
ALHDTALNGTSVFEAPNLHSGSEVKH\*

>SPBIB\_v1\_100104|ID:27162255| conserved exported protein of unknown function [Uncultured spirochete bib]  
MEQMMKMPNLRKIMQFSLLSIGLLVMAFSILMVVAPFRRAPAEVKIKNGATLSSVSRDLR  
AANVIPSSKIFALYMRLAGAERAIKPGTYRFEPSPPYEVARKLIRGDTIALKVMPIEGR  
TARQIAQILESQKIVDASAFLAAVNDPVLTEKLGIPAKSSEGYLEPDTYFLEPGSDAEQI  
VVQMVANFRAAMKKIAGEMQDTLNAQALYEKVLASMIEREYRVPEDAPLIASVFNRLS  
KNMPLQSCATVVYVLTTEHLGRPHPSIVYYNDLRVKDPYNTYLNRLGLPPGPISNPGEVSLK  
AALFPSKTDFLYFRLDDSSSGKHRFSRTLQEHNEAGIIPKGL\*

>SPBIB\_v1\_100105|ID:27162256| DNA primase [Uncultured spirochete bib]  
MARIPPQTRQEILDKTDYLSIYQEHVRLQRKGASYWGLCPFHSEKTPSFSVSADTGLFYC  
FGCHKGGSVIQFLMDIDKLSYTEAMEELAQRAGVTVHFESEKAGEAERERQALLELYDR  
LSRTFHWFMLQHPGHRALEILQKRGIPDDLIERFSLGYAPASRSWLFSFLKAKGYSDNF  
LKRSGLFSRNDVAWPLFADRMFPISDAKGRIIAFGGRAMDQDGPKYINSPETALFRKQD  
TLFAFAQALESIKKTDEAIVCEGYMDVLSFHAAGLTNAVAPLGTAFSTYQAMALRRKASK  
VVLCFDTDEAGLRAAERACSIATAVGLETSVLLLEGGKDASEILERQGAGELTRMAKNTI  
NSGLFLLTRASQLFDISTMEGKAKAVAFLPFLDAMDSDVRRQEYMKEIARTLGVSAHAV  
EMDYAKAKASGSYHQRDSANPSVPMGSSGSARTADLVFIAAVILSNNPFLPSVLQLDSED  
IEDARAKDLIAALKEAEKEGIRDIEGILSFCPDDAAVRFVHEIDASGELSEGLEKIIDG  
LARKRKKALEKERSRLVASLQAKCAEDRMQEKSILEKIMRIDEELKKTGGDLDE\*

>SPBIB\_v1\_100106|ID:27162257|rpoD| RNA polymerase sigma factor RpoD [Uncultured spirochete bib]  
MSDLELDPAILKLEYAKEKKTISFDELSDMLPEQILNSDKMEAIINLLVSSNVKIEEEV  
QIEEEPLPKIVAIPSKNKMVANDKEIASDDPVRLYLRDIGRENLLTAEQEVELSRTMEQG  
ENIIKNTLRKSGMLIPEFYQIIVKATRKEPKDLSLQKENTEKIAERRRLNQFYKDLIDS  
CAADLKAVIDLKKWVIAKGGDVFEFAQLKEIRERLYPIINEADIHPEEITAFSEKFIAAA  
KKIIRNRKEQDRIEGILQVSSAKDLRALGRNLTIKEKREEIEQRLGLSAEEIKDRIRQLQ  
VNEKKLKDIENNFETPIDRIISMAREVNRGRKMMKSAKDKLIKANLRLVVSIAKKYTNRG  
MQFFDLVQEGNIGLIKAVEKFEYRKGKGFSTYATWWIRQAITRSISDQARTIRVPVHMIE  
QINKVVRESRQLMQKLGREPTDEEVAEQLGWEIDRVKAVKNVAREPVS�DTPIGEDSDSL  
LQDFIEDKEVENPAVRTDYNLLQEQLRMVLATLPKREQEVLRMRFGLEDEGYSLTLEEVL  
YFNVTRERIRQIEAKALKKLRQFKRSQKLRDYIDH\*

>SPBIB\_v1\_100107|ID:27162258| conserved protein of unknown function [Uncultured spirochete bib]  
MPMRMDEVFETLRKYQELLSQRVELESQLEAMPKTIDIQNQMLSRRERKSWAEAKEQYEIS  
ESNLRELRLQEELEEAEMKRENAEKQMDGITTQREYDAVNKEIREASEKEQELRRRIQEEER  
RFAEIDDRLHRIEISVSTLEAIEAQKRTEIEAKTKIVLDEAEKIKSEETSLTSELDEDLK  
FKFERIIRSKSGMGIVPIHGVVCTGCHMILPANFVNEVRQADKIVFCPYCSRILYFEEAE  
TDESIEEILAGSLVDLNDEEAEESESESNDESEETVSKAKRPSSRKKKNQSEPLIDNDF  
IIDNMDE\*

>SPBIB\_v1\_100108|ID:27162259| putative Tetratricopeptide repeat domain protein [Uncultured spirochete bib]  
MFNAFFRKISTRFRPLWIAAIVFVLIGCISTGLFFILKNSDAKGVISHREIAKLWNEG  
NIEKTIAESRKATEAFPDEYYLSMRGISAYYSALDAQDEETRQQLLEESVISLRKALVI  
GVPSGMKAQIFYVLAKAYYQKGEPWFDLAERYFLLARNSGSKEKDLPPQYLAVVYAGKKDY  
EHAIEWFELSLKGDTSILLSAAISYKNIGKNDKARELLASLETHATDAKIRLKAKLLL  
AQDSYESGDFSTALQRYEELKEDPLNADAWYGLGLVYAKKNDQLGARA AFRKVVQIDPN  
HADARKRLAEKL\*

>SPBIB\_v1\_100109|ID:27162260|mreB| cell wall structural complex MreBCD, actin-like component MreB  
[Uncultured spirochete bib]  
VGILDMFSPDIGIDLGTCNTLIYVKGKGIVLNEPSVVAVERGTNRIVAVGTEAKNMLSRT  
PTDIIAKRPLRDGVIADPDTTEKMIKYFIQRVFPKNLFFKPRVVVGVPCTCITKVEENAVI  
DSTYKAGARQVKVIAESLAAAIGAGIPITEPAGHMICDIGGGTTEISVISLKGMMVVTSIAI

RIGGDEFDDAIKHIRNIHNLIGDQTAERLKIEIGNASPERTIEKMEIKGTDAITGLPR  
RFEVDSVEIREALMDSVNIIVEEIKKTLGKTPPELAADIVERGIVLSGGGALLKGLPKLI  
AKETGVPVILA EKPMECVAIGAGKYFEIMQRNIGSSSVYESLNL\*

>SPBIB\_v1\_100110|ID:27162261| putative Cell shape-determining protein MreC [Uncultured spirochete bib]  
MKNNGFHRPSRTVHRKAALFILLSLSILFVSTSTVFRVPDLFHGYVIGNIQKAFAAVSSF  
VSRTVGAVSELRNKKDYEALLAKMQEYELKEREFTSLIEENKRLKDLLGLTSFPDAKKI  
AAHIIARDPGNTYSSSFVIDKGYNEGIRKYPVIAFQDQVEGLVGKIIDVKASTSTLQPLY  
DQRFFAAARLAKTRA EGLANGRGRDAPMTLLYIPKTEM DTLKQGDIVVTSGLDQVFPQD  
IIIGRVGSYQLNEFSSSLVIEVQPAIDLSRVEYVFAIENQGALTPYAGGKQ\*

>SPBIB\_v1\_100111|ID:27162262| putative Rod shape-determining protein MreD [Uncultured spirochete bib]  
MRS LFISLSASILMLFIQSTWLSHGIVFGIIPDLAMSIVLFSSFINKDGGQGIIVAFIAGL  
IADMLSAAPLGYAFLYVSCAYLATLLSYVAEKDIFIIPFLLGTGAAIARGILTRFVSWI  
FAANINTYQIFSAEFGIELLADGFFT VLVFFILTFQPLENSPRKALP\*

>SPBIB\_v1\_100112|ID:27162263| Penicillin-binding protein 2 [Uncultured spirochete bib]  
MAVLKKKITNRILRALV VVLLAIYALNLFMQILRKQLFTSEAERISLQSTRIPAPRG  
EIYDRTGRVVLAGNIEAYS VYITPSELPA TKRESVILLSSKLLNISAEDIESKLPTGRLT  
SYGRVAVAKNASLSAISEIAAHIDEFFGVS WTSQPLRDYADLRSLSN TIGYVGSITRDEY  
KLFYNKGYTLEDLTGKAGIELIYEDLLKGKDGWIAKAVDVHVGKDISRNKARIEAPEPGKR  
LILSIDSNIQKIAEDALGKRQGSVVVLKPATGEILAMATYPY YDSRVFMSDNAGQEYLKL  
LNDPQKPMLNRAYQSSYPPASTFKTVLSTAILEEGFISPDKTIYCSGEINYGGRSWSCWI  
KKPGHGAVDLKNALAQSCDIYYWTVGRDYIGVENIVSYAQDYGYGKLTGIDLPGENPGLL  
PTPTWKEEKYNDSWTPGDTMNL SIGQGYMLASPLQVANMMAMIVNGGVIYKPHVLKEIRD  
PGTGALINEVQPEVLQKSSISEKTFETMRSLLRGVIVYGTARAPISTKAVQIAGKTGTGE  
IGLKDRWHSWFASFGPYDAPAKDQIVVVTMIEASNPEWVWGPYAANVIYQAIYAGQDAKT  
AAATVGVKLDGIAVGGRE\*

>SPBIB\_v1\_100113|ID:27162264|mrdB| Rod shape-determining protein RodA [Uncultured spirochete bib]  
MNLQSLRRLFGNIDYLLIATILLCAIGIAAIYSSGVDAEGRLVSNEYVKQLVWFVIGFF  
LLAGAALFDFSRFKDTSWIFFAIAIALLVLTRVAGR VVNGARAWIGIGGFGIQPAEFAKI  
ATVLMMLGRYLD SA EYDSSFKKL VMTGLILSLPLMLLILIQPDFGSALVFFPAALIMLTLAD  
VDFRYILFGVISILGIFLFLSLPLYA ANHYSQDNILNVIIAKTDILVLIFVILFIAVIA  
GVGWLKFKKRYYYWLSYAFAILAFS IAGAFAAHKLLKPYQIERLLVFIDPSIDPRGSGWN  
ILQSITAIGSGGFWGKGYLQGSHSHARYIPQQSTDFIFSIIAE EFGFFGCLVLFALY AII  
FIRCFVLIETSKDRFSQYIVGGILGIFAFHFMINVGMAMGIMPVTGIPLYFISYGGSAMW  
SSLISIGILTGISARRYSA\*

>SPBIB\_v1\_100114|ID:27162265| Radical SAM domain protein [Uncultured spirochete bib]  
MRKSFIDPLRDFGDALFHIQKPARYVGGECDAVPAIDQDDQRLRIAICFPDLYEIGMSNN  
AIRILYSMLNEKRSSLICERVFAPAPDFENLLREKNIPLYTLESGIPLSECDILAFSIGY  
ELLATNVLTVMERGGVPIESIERSDKDPIVLAGGPAVTNPLPFERFFDAVWIGEA EAGFV  
ELMDQVAELKKSQAQRTDILRHISRHPSVWMSSASCKALGIEKKRVVRAIYPDFPKTAY  
QPSFPYPVLNPNVHSHGTVEIMRGCPNGCRFCHAGY YRPQRSKYPGIIQKEVEDLVMQKG  
YREITLSSLSSGDYPGIVELFETLNSKWSAKKISFQLPSLKVDSFTLPLEKISEVRKSG  
LTFAVETPLDEWQCSINKRVPLEKIELILREAKAKGFRSAKFYFMIGLPVSGRGMNEAEA  
IVEYIKKIAAVERIAIHVNVGTFIPKAHTPYEREEQLSEEEALECINYIRRNFRYMRNID  
VTYHPPFLSVLEGIISRGDEAVGDLIIDAYRSGARLDAWEEFMNRDVWRAALKKFNETRG  
EGAWQAYLHKRSLREELPWHTISLKV SQWLKHEKEKAENGIIT AACNEICTNPCGICDK  
YINIVSNSILVEPIFDNIEFVGSSNKKIRKIDFEWAKAKEDNRIRMKLVFTWSKRD L AVL  
YPMHEVANAFSRAFQILGIPMQYTEGFNPQPKLELSPPLPLGVESERDILGVFISVDKDA  
QQLRFREISESSLAVLQSINENLPKGLAVDSIRLAQ GKHTIGSLFSAAEWKYAFIDQESY  
SIACAALCSNSADFISWKSFDDSRELFVLENFEPASGKIKNFYKTLKTFSESSKGKEIKF  
RACRTKCFAKDEAGNLLPLEEAL\*

>SPBIB\_v1\_100115|ID:27162266| exported protein of unknown function [Uncultured spirochete bib]  
MRGRKKYFFDNPRIVAAGAKRKS YIFRALLFASAAISSFLMFSCGTPSAEYL YHPIDFTS  
ETGILRLLPNPSNIDDSYVAALFKGYEIIYHVFD TNDAAALNSLSLLQSLSSYDPSYFMSI  
ATSSTYNYYP LLHRFDYLIDPHRPLIVVSN TTNNTYLEFDLNMEINKSWSITS GTDIIVD

SVVRNLANNTSADFFVSAYYNSKDQDYTGSDSPKTVYIVFFAVSYGISEASLGNALYSEP  
VIIDAPVEYTPNS\*

>SPBIB\_v1\_100116|ID:27162267| conserved protein of unknown function [Uncultured spirochete bib]  
VNQQEKQPRKDMNVLNKNEKKAFFSDKLADDFISANRILFIGIAIGIVVAIAAVGIYTAVSE  
NVATASSRAMELAEQKLQQWSQETDEQKKADSEKALLVDLDTIAKKWPHTIAAQRALLRK  
AAILNQQKEYADAECTALDALARNKNSYAAPIALELAAVSAEEAGNKDAAIAHYTQLAKD  
YLKDNVPAPHALFNLGRLQEEKSDYKAAMASYNQLVSAFGGSDWALLAKNRIIYLKAKGL  
AE\*

>SPBIB\_v1\_100117|ID:27162268| Transcriptional regulator, NifA subfamily, Fis Family [Uncultured spirochete bib]  
MTAMVSAIDPDKFRTLIDINARLNSSYTNFRSLLKAIVESAARLVGAEEASLALFDAATE  
TLRFEIALGPRGLELQKKSIPATEGIAGWVYQNSKSIIVNDAAHQRFSPSTISKEIAYST  
NSILAVPLKVKDKTEGVIELINKTSHGLFMADDLEWVEIFAVQAGIAFENAKQFERTEHE  
LTYLQQKVQEEQGWHPLVFSSKVMQERLDLVKRVAPSDASVLILGESGVGKELIAEQLHL  
LSRRAEKPFVRVNCALPENLLESELFGHVKGAFDTAISNRAGRFEAADGGTIFLDEIAE  
LPLRLQAKLLRVIQKTFERVGSSETIKVDVRIIAATNRDIEKLVQNQEFRSDLYRNLV  
LPIHIPPLRERLDDIPPLAEHFLKYARETNRGIMHFSDSA VQCMMGYSWPGNIRELENA  
IERAVLIAKGNLITADDLMIGNKAEPSYKQFEGKDLKEAIIKFRHYIQASLEQNRWNQT  
ETARHLQIQRTYLSRLIKELNILQNKE\*

>SPBIB\_v1\_100118|ID:27162269| 30S ribosomal protein S1 [Uncultured spirochete bib]  
MAENKEVEMDVTEPSRDDIQTQLQEYQLKSLEGLEEGDLIDGKVVQVAGDTVFDVGYKS  
EGKLSLEEFQDNPPKAGDIVK VILIRKETHSGDIVISKKKADEKLFWKSIAAFKDHLPV  
EGTITKEVKGGFEVNLGHGLTGFLPLSKADIQRLEKGSSELVGTQAKFYLERLYSDKKINI  
ILNRRKLMEEEEIEQHRASFFQNTQIGDTVKGIVKSFTSFGAFIDLGGFDGLLHINDMSWG  
HVTRPKDFVRKQGIEELKVIRLDPEEKRINLSLKHFTPDWNSFEEKYHVGDVVKGVTK  
LTDYGAFFIEIEEGIEGLAHISEFSWVKKVRKPEDMLKAGDIVDCMILGYDIPAGKVSLGL  
KQVQPNPWTIDERYPAGTRLKRKIVKVTNAGAFVELEEGIDGFLHIDDYSWTQKIKNPS  
SVLHEGDEIEVIVLESNAEDRNVRLGVKQLSEDPWRSFAKTYKFGAIVEGTVSSVTDGFGV  
FVKVPGEIEGLIKKQDLVSDRSESYDDALKKYQPGMQVKA VVIDLNPDRQKLGKLSVKDLI  
QKQQREEISRFIQEDEGEAGYTLGDLLKAKDKEND\*

>SPBIB\_v1\_100119|ID:27162270|cmk| Cytidylate kinase [Uncultured spirochete bib]  
MKVAIDGPAGCGKSTIARMIADNLGFLYINSGNLYRAVAYLALREGVSWQDQALTALMR  
QHRFDYKPDGSLVDGERLLAELRTPQVDAIVAQVSAIPSIRVEVNAIIRAISEGKDVIS  
EGRDITTVVFPDAEVKFDYLDASSQVRAERRFRERQEARSHAFSQPDSQQAPRDMIAQTIP  
APQSAPAIEEIRKNIEMRDQIDTQKSVGALKIAKDAEYLDTSDLTIQQVYEKVYNKIISA  
RKAHGRK\*

>SPBIB\_v1\_100120|ID:27162271| Pseudouridine synthase [Uncultured spirochete bib]  
MSDLQAKPIRLHAFLAAAGIASRRACEELIKQGRVEVDGQPASIGQKVYGTEDIRVNGQP  
IPVLSQKRFRYILLNKPKGYLSSIKDPQGRPCAIDLIAPSIPDRLYNIGRLDQWSSGLL  
FTNDGNFAAQLMHPSSSEIDKEYFVQTDQPIPPGFAASFMRGIILEGVRYRAHAVRVVAPD  
KAHIVLIEGKNREIRR VLEHFGLRAKILERIRIGPLSIGELSPGQWRDLTEQEIYALKAY  
MSSRPSNKGPRK\*

>SPBIB\_v1\_100121|ID:27162272| Segregation and condensation protein B [Uncultured spirochete bib]  
MNEQLDAEAAALVGAILFLENPVSEERLAKISGLTDEQISLALQRLCAEYELPVHGFAPT  
QSAGGWILAPKLSLWEQLKDHYGKKNEMKLSRAAMETLAIAYSQPITRAEIEAIRGVNV  
DGMIRLLLSRNLAIEIGKRDAPGKPMQYGTQDFLKYFKLNSIADLPKLDEIENARFSKP  
ETPEG\*

>SPBIB\_v1\_100122|ID:27162273| ScpA/B protein [Uncultured spirochete bib]  
MMQDFDNDANGEPISVSSTGRTFHLSDFEGPLDLLLYLIKKNEMNIYDIHISSITEQFLQ  
CLNSDPSASLDELSDFYQMAATLLYIKSRMLLPNSQDELDEIDPRRMLIDQLIEYHRYK  
KLSELMEQREMEVEWFVERSSSQRTLFPADNPDEPWIPADSWDLLRFTFASMIRHFDSER  
IIDLYEEVSINEKIALIHELLDKKGNFRFDDLISRHSSALDLACAFLAVLDSTKNRIISI  
RQHRLFGDILIPYSSPEAPHERTA\*

>SPBIB\_v1\_100123|ID:27162274|folK| 2-amino-4-hydroxy-6-hydroxymethylidihydropteridine pyrophosphokinase  
[Uncultured spirochete bib]

MEKVWLGLGSNMGDSAQILELAVQDLSKMLSDMHVSGLWRSRARYEYEEQEDFYNMVVCGM  
TELNPRQLLDSIHDIACYGRNRSREIKKGPRTLDDIDILLYGGKIITEPDLIIPHPGLAE  
RKFALLPALLEIDPSLIHPVLGVPLKMLAASLPPQGIYPASESQYDEPYE\*

>SPBIB\_v1\_100124|ID:27162275|recA| DNA strand exchange and recombination protein with protease and nuclease activity [Uncultured spirochete bib]

MAKRQIRAAEETVSEREAKFSQESNAASKQDSGIDPEIQRERDQKLKALEAAKLQIEKQF  
GQGSLMKLGAHVIAQGIEVVSSGSILLDEALGIGGYPRGRIIEIYGPESGKTTLALHAI  
AEAQKKGGAIAFIDAEHALDPVYARNLGVDINELYISQPDNGEQALDITESLIRSGAVDI  
IVIDSVAALTPQAEIEGEMGDAHVGLQARLMSQALRKLKLAGTLSKSKTILIFINQIRMKIG  
VMFGNPETTTGGNALKFYASVRLEVRKIETIERGQDEEAIGNKVRVKVVKVKNKVAPPFRKA  
ELEIIFGKGISWSASLLDAAVKCNVIEKKGAWYTWGAEKIGQGRENAKAYLEQFTEEAKK  
IESQVREILFHPEKASNANPDQGASSEAFIAVSADELPSADTASDTGRIRAEDLF\*

>SPBIB\_v1\_100125|ID:27162276| conserved membrane protein of unknown function [Uncultured spirochete bib]

MHQVKNPNIRPLTFVGLRLLFGRPANEQYNDLYRARHSVFWGAVLGIGISLVPLYIVLVFV  
SNGMIQGITDRYLETKTSHLQMSLPFSFDATQRNALTQDVSRMPGIISTSFEDVDGIGLAA  
SQNGSTSAQIRGLDGA VLQDKGFNRFSVDEGQMYPNRQNEVVLGRYLARKLEVKTGDSV  
TLITLRSNDSTNYLPKLA VFRVAGIISGYRELDANWFIIQSDAALRLLNSATAYAFMGI  
KISKPYGSDLRIASEVSRAGQKYGLTSEQGARVRTWREIEKSLFQSFSTRSVLVLIMV  
IAIIVAALNLASALTTFVIEHRAEIAIIRSFGVSRTQAALIFLLGGTATGAIGCIAGSLA  
GIAISIFINQIISGMQAILGFASRLLSADRQTIQLLNPDYYLEHIPITMDWRFVVLILLS  
GIALSAIASILPAMKSTSIAPAELIRHE\*

>SPBIB\_v1\_100126|ID:27162277|lolD| outer membrane-specific lipoprotein transporter subunit ; ATP-binding component of ABC superfamily [Uncultured spirochete bib]

VSEPIIFCENLTKTFSSSAEVLRLDNADFVLEKKGACTILGPSGSGKSTFLAILGSLER  
FDSGTVKIAGYDLGQAQEKMLHIFRREVIGFVVFQFHLLNDFTALENVAIPAYMAGVPRA  
ESWDRAKLLDLVGLNLRATHFPSQLSGGERQRVAIARALINQPSVVLADEPTGNLDPAS  
ASAVKELLKSLPEIARTTLVLVTHDPELAGIGDSSYLLKGGHFECIR\*

>SPBIB\_v1\_100127|ID:27162278| conserved membrane protein of unknown function [Uncultured spirochete bib]

MAANEHGTFEPLQTRKRAGFMALFRIARWTTITGRKTSHRSTSFLFSVIGIAAGIVALIVV  
MSVMNGFQRQYIDSLETSSFHVRIMPESDPSILAQSLRENSLVRSVTPFIETNLLAEG  
AEGRQNVVRAMWISPDLDGADKGFNCALHISERAAEDGIRQIGIMIGTETARLLGMYNGQN  
LVLRGAVVNPDEGVQQYEIALPVGGLFKSGYYEIDAGLVILPMASASKLKTLPASLVLGI  
KLKNPEKVDQFIASLAHTPGIGRTESWRDYNRSFFSALRTEKVVMFILVSIIFAVVAINI  
HYAMRRNIARKSRELAAILAIGTDRRSIGSIFMLEGLMAGILGALGGIGIGIPLAKNIDH  
VINFAVGIAEAVVSFLYRVGIAKSVPDLSLFSPTIFYIESIPSRVYASDIGFIAFFAILF  
PALAVYAAAYRRFRNASPLEVLRSE\*

>SPBIB\_v1\_100128|ID:27162279|ftsY| Signal recognition particle receptor FtsY [Uncultured spirochete bib]

MKFAEKIKALFRRNKLSEETFEDLADLLIEGDMGAALAFEIVDSLKAACKKEGISDPDAA  
KAKLKELLRPYIKTATFELDPGKLNIVLILGVNGVGKTTSCAKLAQWAGRQYPGNNVILA  
AGDTFRAAAIDQLKIHGERLGIRVVAQQHGSDPGAVLWDAIDAAAAGAQLVIADTAGRM  
HTRSDLVKELAKLDRVVSQRADQANYRKLVLVDATTGQNAMRQAETFHEAVKVDGVIMTK  
YDSTSKGGMIIAVSRQFGLPTLFLGTGEKYENLQPFNIDAYLEDFVGE\*

>SPBIB\_v1\_100129|ID:27162280| membrane protein of unknown function [Uncultured spirochete bib]

MKTFKGSALLAALVFLFLTSNVFCQTPANIALAFPVRIEMSALNHLIAENSSEWDI WAS  
VRQGLASNQTLNNGSPLPEAGSFVRLKESFQTRIETRISAVLDDLAMKVLGEKSNSTLL  
EAGELKGAQFFVCTVYAVEGSAFRFGMALLEKSGKSTYFSDPVDVFSISKAVQAATESM  
ILRGTFSAKTVIAPSMANASANLPKTEPWILKSRYEKANNTFKFAIGGVSSISLSAAFLSA  
GLWQTYQEAAIRNSAFNSAVTISGIAAGASIAATAVFLTAIWNNAVITLQTTR\*

>SPBIB\_v1\_100130|ID:27162281|prfB| Peptide chain release factor 2 [Uncultured spirochete bib]

VLAEIKTLKERLESWKKLHDDILGLEEMYELVRDEGHQDMEGELLANLNDIRNRFDKALI  
LELLSGEADRND AFLTIHAGSGGTEACDWASMLYRMYTRWAERHDFK VETLDFLEAEGGI  
KSVTIQISGEYAYGYLKGETGVHRLVRISPFDANARRHTSFASVSVMPVLDDSIIDIRP  
EDIRIDTYRAGGAGGQKVNKTDSAVRITHLATGIVVTCQNERSQYKKNKDVAMSILKSRLY  
EYYKAERDKETAKFAGEKKEIAWGSQIRSYVFQPYTMVKDHRNKFSVGNVQAVMDGDIDP

FLDAYLHWQWKGGTIVEGEDEDI\*

>SPBIB\_v1\_100131|ID:27162282|mro| Aldose 1-epimerase [Uncultured spirochete bib]  
MGIEKKHFGTLASGEDVSLYVLKAGDFLAAFTDYGATWVSFIMPDAHGSFDDILLGFSTL  
SGYAGKHPYFGSTVGRFANRIGGARFELDGKEYKLWANNNRNHLHGGRRGFDKYLWNGEL  
SSISGDPALMLTRESPDGEEGYPGTLAVELTVSLSPSGSLRLRYQAKTDDKTLVSLTNHA  
YFNLAGEGNGTILDHELLMHSSMYLPVDSSELIPTGAIASVDGTPLDFRTMKPIGKEIRNA  
NDGDFDFCFIIDKEYSPLKPF AEIREPKSGRIMTAATTLPAVQFYTGNNLNGIAGKRGSVY  
DRHS AFCLETEMYPDSPHHPNFPSAFLLPGEKWEHETIYNFSVMK\*

>SPBIB\_v1\_100132|ID:27162283| Short chain dehydrogenase/reductase family oxidoreductase [Uncultured spirochete bib]  
MEKSDDRPVALVTGATSGLGLAIAQSFIDAGFIVFGAGRQNPENLPAGLIYVRTDVTSN  
DSVEECRNYILSNAGRIDVLCGAGSGISGSIEDTPISEAQAQLDVNFFGVVVRTVQAFLP  
AMRQQKSGKIIVIGSIAGRIGMPFQAFYSASKFALEGFVESLRHEIRAFNIQACIVEPGD  
FRTGFTSARRKLVPRGSAYTSQFEKAIGVQEHDELHGALPALAGKRIVQLASARSLPVRV  
TIGPLFERFAVWVRRILPDSWFEAFYKIYYKL\*

>SPBIB\_v1\_100133|ID:27162284|cmk| Cytidylate kinase [Uncultured spirochete bib]  
MGIIAISGKSGCGNTTVSRMVADRLGYTPVNYTFRMTAAEMGMPLLEELFRKAQESLEYDR  
KLDEHQTMLARKGNTVIGSRLAMWMVPEADLKVYLKASPSVRVSRIFAREGGDRKEIERF  
TLERDARDRQRYLALYNIDIDVSV AHLVIDTERWSASQVADIIDAYNISLYGEQHGKI  
R\*

>SPBIB\_v1\_100134|ID:27162285| conserved protein of unknown function [Uncultured spirochete bib]  
MKSMTGFAHRTISAKGFLGSITLKSNNRFFDLSLSIPASASGIEPNIREFLGSRISRK  
IECTLRLLKKTEATLDDITMNFQSAKTLTEQLRNLALACGLNDTPSLDVLTRFPGVIELNT  
DIDSELWQILFPTMEETWREFEESRIREGLATQQNITNQMNRFSTKLDEIEQNAGQLEQ  
LVHDQITARFKELLGDNYDESRLQELAVQLVRLTINEEIQRLKAHISAFKAIAAEPSCG  
KKLDFLCQEMNREVENTIGSKNMLVAVSLAVVEMKDALENIREQLRNVE\*

>SPBIB\_v1\_100135|ID:27162286|murC| UDP-N-acetylmuramate--L-alanine ligase [Uncultured spirochete bib]  
MELKQFPSNLYGLQIHLVGAKGTGMTALAEILHSRGALLTGSDVPDVFYTD SILRALNVK  
LFENFD AKHIPDACDLVIYSAAYSRDANPELKA AAAHNIPIYSYPEVLGALS LHSTSAGI  
AGVHGKTTTALTGILMEALSMPATVLAGSAISNFNRCTLIQGDYFIAETCEYRKHFL  
NFKPSWIVLTSVESDHQDYFPTYESIRDAFVEYVLSLPSGGTLIFCADEKGATEVADIAL  
QQRKDINFVEYGFSAQGWKIRSLRTL AGTNTFITGNYPVDISLHVPGQHLVLDAVAALA  
LADSIFKAETS RDIEPHEWKMMANALSSFRGSKRRSEVVGEYGGILIIDDYGHHTAIAA  
TIEGIKKFWPHRRLVVD FMSHTYTRTIALQDAFVAALDQADAVVMHKIYASAREQPIQDF  
DGQKLFQKLCERRKDLLVPDDSHLAATSIGHGESTLRARTGFALYTEEPLDALPMLEK  
KLKPGDIFLTMGAGDNWKLGRALAELENKKA IKHGPERKHTE\*

>SPBIB\_v1\_100136|ID:27162287| putative 4-alpha-glucanotransferase [Uncultured spirochete bib]  
MQSFRVVLGMYNSLPYNASDTLYEQAYQGAWRPFLSGLYKFPSIKAVIHFPGNIFAWIEQ  
NHPEYL YLLIEMVRKGGQIELLGGGFYSPLAPL VSTQDMTGQVEALS AFIRKTIGKRPSGA  
WLYEYSWTSSLPAILQNSKIQYTFLPAAQFKEIAPENLSCQP VASEDHRKMVLIYPAFES  
HSDDSAFVPYEATLLKLQQDNPQISAFVIMADGNAISSTWERSGLES PDVLFERSFAWFQ  
KNCLEYDTITASQLYKSSKAARTIYFAQCYSRRFRDYCERIIQKADIPRFECVQISKQSV  
VDHPLVHLLYQKLN FVSAMTNLFRGDKSRKKA SLDDIWRAQSGELFWVSPTGGILRSEAR  
LGAYASLIEAEKTIRQNRFHFMAYDDLDFDGIKEVLYQSSVYNCYLKS DSAVAELDSL  
RTGRNYACGWNAEHFSTGCFKDEIRAAGTFETRLFPDYEA WNLVENAKESLNATFYREFH  
GKIDNLGAFFGCRKSYQFENDYFSIN YELTNKGSNPFPIRFACTISEIIALPSLKDHKVQT  
LAHRQSRQLPADQSFAADAIDGVEIGDVLGA EKMIIRSDNPFSLDGVPNFAESP KDGRI  
TEKEAQDARIFEGFTLTIGWDFSLPPEGTVLFSVSVHIEH\*

>SPBIB\_v1\_100137|ID:27162288| Acid phosphatase/vanadium-dependent haloperoxidase related protein (modular protein) [Uncultured spirochete bib]  
MHFRLDMRGLFPHTFSVEASSHNLP SLLANPIFVSGALSIFLAQVLKAILAFLKRHKLKA  
KEIAFIMLWKTGGMPSSHSALV VSLSAIAAFVEGFDSL FVLSFFLGLIVIRDALGVRRSA  
GLQSKALNILGKQMSERFNIAFTPVKEIHGHRWQEVVVGAVLGM AVSILVCWNYIFHAVS  
SSLQ\*

>SPBIB\_v1\_100138|ID:27162289| Pseudouridine synthase, RluA family [Uncultured spirochete bib]  
MLKAPETKIGFARRDGRLCDDASTLKVCGKSPRMSSLKCIADCLRIDLKSLWHYVNVNHE  
VKKFSLGADDDGRRADRIVRKILKNIPLSLIYRLFREGKIKKNGLTAEASERVHSGDFME  
IIGLDDTAFKKNPPRNKEFSARSIDEQPSVIWQNEHLIAMHKPRGMLTHDGEASLDAFVY  
SLLKDNLSPSVSFLPGPLHRLDRNTSGIIIFSKTRLGAEKFSSAIRRREVQKLYLALVEG  
TMDGPLRLQDTIERNRKAHVSVLNQGDKGGR LAVMDAIPLFARERYTLVLVDLHTGITHQ  
IRAQLATHGFPLAGDTKYGGSPLPLQTGYFLHAYSLRMEHPVFEDMPNSIIAPLPELFGK  
TVASIFELDYHDLYKTMQRLTEDI\*

>SPBIB\_v1\_100139|ID:27162290|hflK| Protein HflK [Uncultured spirochete bib]  
MANSTIFKKPPNITIRWPLVLIVLIAIGVIIFLSTSFIIVDQTEKAVITTFGKYTKTLGA  
GLHYKLPFGIQKAYMVKTQVIQTETFGFRTIKPGIVTQYSDKKYPEESTMLTGDLNIVDV  
EWIIQYRIANPEAWLFAVTDREKTIRDTSQTVLNMLIGDRAILGVIGPDRQTIQDSAVVM  
MNELFTKYGLGIVVTQVQLQNIVPPEGVQA AFEDVNKAIQDMNRFINEGREAYNAEIPKV  
QGQADQILEVAQGYAAERVNVAKGDVARFNAVYDEYRKAPDITRKRLYEMMEEIFKDQK  
NIDLIDKSLQNILPIKNLTQTTQPQEATK\*

>SPBIB\_v1\_100140|ID:27162291|hflC| Protein HflC [Uncultured spirochete bib]  
MKKIPIIIAIVA VLAVLFIVIFGPLFVLNEGEQAVVVRFGKIVAVHTEAGLKWRSPFVDT  
VMKYPKKLMSWDGEPQRIPTKENQFIYVDTTARWKIVDPVKFYETVGSIDVAYGKLDDVI  
DSAVRTIISNYLREAVRSSDEILNATKIETFQTGEVENSSTLQQLAITPTQYEKIEKGR  
RLLADEMRRLLVSNIVPTFGIEVVDILPRQIKYSDELTESVYQRMKERNQIAQAFRAFGE  
GKKAEWLGKLENEKRSLSSAYAKGEIIGKADAEASKIYADSFSDPSFFFEFWKAIESY  
RKTMPAFSKTLSTGMDYFKYLYSPTGR\*

>SPBIB\_v1\_100141|ID:27162292| putative Metallophosphoesterase [Uncultured spirochete bib]  
MSTLAIADIHGEIEVLEKILEEHPNAQYILIAGDLTNFGREKEAKKVLAAALERRFPQS  
NLYFVAGNCDTV SARNVFSRHPGYIEGKCAQILEGRAIASNASNPLYVIGCGGGLVHTGL  
TPFERKDEEMASSLQAGFLQCNFSNPSAEQKEGGPKPLIVLTHTPPNGTYADMRHMRHV  
SSSFISFLYEYKPLLWICGHIHEGRSQAEDETLVINPGPAAHGSAALISFEQREGSYHA  
VAELRGI\*

>SPBIB\_v1\_100142|ID:27162293| conserved protein of unknown function [Uncultured spirochete bib]  
MSKKAWQIDRALRLTAIPLDRRVHTSNWYTSETIFPTGDDLIQLFWDSKVPGSGAPEIPY  
VEMVQAMGNKGYDVSAAEELLPEGIELARKGERADLRVLTARLLHAIHTAPVDP AHTYWT  
YRHPERWDDVRAAMPAHADDDKPR TIPRDIEEKILEGWTGQLAGGAFGT AIEGYHTDQIEK  
VYGRIDS YVTEPETVND DVVYELVFLDVFEQRGRALSSRDIGLEWVRQIPFGWSAEWIAL  
HNMADGILPPESGSWHNPYSNWIGAQM RGMVCGLVAPSWPMEAAARLAHIDGLVSHAENG  
YGEMYAAAL TSLAFAMDNPRELVEQAAGFVPAKSEYAAVLEKCLRIVKEHKSADA AWRVL  
DDHFQKYNWIHA YPNIAAVIVALWYGQGDFTESFRILAHAGLDVDCNAGLVGT VLGVMRG  
VPSKWADPLGGILETYIAGKEKLSIRELAARTARLAQRRA\*

>SPBIB\_v1\_100143|ID:27162294| putative ABC transporter permease protein [Uncultured spirochete bib]  
MNVLIGLITGMISGATPILLAALGGTFTFYAGVFNIAMEGMMMLMAAFFAVLGSFFFHSWV  
IGLAFGVLGSLTLALIFILFSVKLETDEFVTGIALNLFALGITT YFLRQIFKVKGVFTSK  
SIVPVPQLHIPFIEKIPFVGPVLSGRNLIVYIAVIATVFCYYLIFKTRFGLRLRAAGYNA  
DSL DSSGVRTSRIRMQALLLCALFCGLGGAFLSLGYVTLFAENMTAGRGWISLAAILVD  
GHPYGIAAISLLFGFFDGLGLFLQNYGVASQFTAMIPYIATL FALYVYAQRREKRRKRV  
\*

>SPBIB\_v1\_100144|ID:27162295| putative ABC transporter permease protein [Uncultured spirochete bib]  
MKRRLWSGLVGVVVALAVGALIMLAQGYKPLSTYVALFQFSLGGIGPFTTTLKNSVPLVL  
TGLSAAVAFASGPVNLGQPGQFVFGAL AATLGGLYIRLPVLEIPLLLLLAIAGGALWSS  
IAAFLRRAFEMSEFIVTLMLNMIADFFTA WVIAFPLMDRKAFSPMTPQIAKSGWMPDLGL  
LSSSTLVM LGAVVLVWFV FHRWRAGYEWRTGQNSVFARLGGCDIHRNFLAVMLVTGALA  
GLAGGLVVMAGPHRFIKGLGANYAWDGIMIAIMANNSIVGTLVYGVFIAAIQTGALGMEL  
ITNVPSEIAQVLQAVLVLIIVATREYTNVLLDRLSARRQAKERAA\*

>SPBIB\_v1\_100145|ID:27162296|tsgD| Glucose import ATP-binding protein TsgD13 [Uncultured spirochete bib]  
MNDLIALHNIVKVYPPNVLA VDDVSVSFCCKGEIHSIVGENGAGKSTLMKLLYGLVPFDSG  
RIEFGGVNVRFRKPGDAIAMGIGMVHQEIVLIPQYSVWENVVLGAEPVRTLGRIDSRTAI



DAVRSKIEEFQFNLDPLAIVDDISVAARQKVEILKLLFRNVSVLILDEPTAVLTPQEIPQ  
LFAELKRLRDRGHTILFISHRLDEVLELSDRITMRKGRKVATVEASETNKESLATMMVG  
RQVIFTSKRTPHQRGELVFEAQHVDWERGDGLKLLDDVSFSVHAGEIVGIAGVEGNGQFE  
LVNSIMGLEQPTRGSFLVKGKDITSLILERRKLISFVPQDRGKMGASLSASILDNAIMT  
HHRLEKRFSRWHGLVLDYRKARDFVDMLKERFSVQMASRQSDFRSLSGGNQQKVILAREL  
LLATPFFLMDQPTRGLDVGSIEYVHGEILAMREADRAVLLISADLEELFLVADRILVMHR  
GCIVADLMTEKTIEEVGAYMLGGRASA\*

>SPBIB\_v1\_100146|ID:27162297| putative basic membrane lipoprotein [Uncultured spirochete bib]  
MKGRKYVLLGALFLLGAALTAYSQTPKINTNRVVYLINGALGDNAFYDSGEAGIKNIGR  
TYKVETRTIECNFDAGKFQPALDAAVQYADIIFVISYGFEDQLKAIADKYPNKIFVNIDT  
VVENPKKTITSVFFLAEQSSYLAGMTAALLTTTTSLKGVNKDKIIGVIGGDTDPVSAFV  
FGFQNGARAVDPGVKVLTKSLGGAWDDSAK GKQAALQLYDQKADVVIYQVAAAAGIGVLQA  
AAERGLYAIGVDTNQNDLEPGHVVASAVKNVGATIEKVFKTIKDGTYKPGQVINSGLADG  
GVDLDFATAKQQVLPKSIIDKVMQARQQIIDGKLTVKLYNGENVVWQ\*

>SPBIB\_v1\_100147|ID:27162298| protein of unknown function [Uncultured spirochete bib]  
VGSFAFQNTSQMRAILKGYRKIRGKGNPGWAIRNASSSGIIGRSMLTARE\*

>SPBIB\_v1\_100148|ID:27162299|deoD| Purine nucleoside phosphorylase DeoD-type [Uncultured spirochete bib]  
MHEKEIHEKNLANYRNGTPHNAAKAGEIAPVVLMPGDPLRAKRIAETMLS DVHQFNAIN  
MFGYTGM YQGKRISVMGSGMGAPSMGIYSYELYSFYEVQAIIRIGTCGGLAPDVEVGDLV  
IAMSASTDSNYAHQYELNGTFSPCCSYELLEPAVQLARARNMRFHVGNV FSSDV FSLYSA  
LPPERGWQKWGRMGCKATDMECYALYCNAAWTNKQAL TLLTCSDSNITHKEMTPPEARQNS  
LDAMIQIALDIA\*

>SPBIB\_v1\_100149|ID:27162300|tyrS| Tyrosine--tRNA ligase [Uncultured spirochete bib]  
MNRALVQLQERGFVQQCTDFEGLSRLMDEGPVTFYIGVDPTGPSLHIGHMVPFFALRHLR  
DAGHVGIALLGGGTARIGDPSGKTEMRKLISYEEIDENTRRFIKQLDRFVGFVGHVHAFTA  
NNKDWLADLNYIEFLREIGRHFSVNRMLSFEAYKQRMEAGLSFIEFN YQLLQSYDFLQLY  
RRHNCRLQIGGDDQWGNIVAGIELIRRVEGAECYGLTFPLVTTSDGKKMGKTEKGALFLD  
PNMTSPYDFFQYFRDVS DSDVERFLLMFTFLPSEECRRLGSLKDAELNQA KERLAWEVTA  
LIHGKEEADKALAAARA AFRGDGAAQLPTIAIKRARLEAGIGVLDL FVEAGLVPSKNEA  
RRLVQQGGASVNGQKVENEKQVFTIAALQDGAMMLRAGKKRVARVISKDN\*

>SPBIB\_v1\_100150|ID:27162301| DNA-binding protein HRL18 [Uncultured spirochete bib]  
MPSTGKPLTKVEIINALAKKTGFTKKDVGLVLDELAKLSYSEVKKSKKFTLPGIAIMKVV  
KRKAKVGRNPATGQQITIPARDVIKISVAKPCKDAVLGK\*

>SPBIB\_v1\_100151|ID:27162302|glyQS| Glycine--tRNA ligase [Uncultured spirochete bib]  
MADTTVTMDKIVSLAKRRGFVFQSSEIYGGLSGAWDYGPQGIELKNRIARFVWKEMTQLH  
DNIVGIDAAILMHPRVWEASGHVENFTDPLVDCKKCKTRFRADQIPPENLAARKCPEC GG  
ELTETRKFNL MFKTTLGPVEDESGLVYLRPETAQGIYVNFKNVQQSNRMKIPFGIAIQIGK  
AFRNEIVTKNFIFRTCEFEQMEMQFFVKPGTDEEWF EYWRDQRWNYRKL GIDMKNLRWH  
RHGPDELAHYAKDAYDIEFEFPMGFKELEGVHNRSNYDL SRHQQYSGKDLQYIDQDNGNE  
RYIPFIIETSAGLTRQLLMLLCDAYEEQKVADKGNEDDWRTV LHFHPDIAPITAAVLPLM  
KKDGLAELAQDIRAELKEDFVTDYDQAGAIGRRYRRQDEIGTPFCVTIDYQSKEDGTVTV  
RDRDTMLQERVSRSHLSEYIRAKIKSYKRAERIS\*

>SPBIB\_v1\_100152|ID:27162303|glnS| glutamyl-tRNA synthetase [Uncultured spirochete bib]  
MPEVNEKTEYMDFIREAVAEDLRTGRFKEVHTRFPPEPNGWLHIGHAKALFVDFGVAQDF  
GGKCNLRMDDTNPEKEDMEYVEAIQRDIKWLGFWDWEDRLFFASDYETLYELACKLIRKG  
LAYVDDLDEEQIKEYRGTNVPDKNNITYTPPGKNSPWRDRSIEENLDL FARMRAGEFPDG  
SKTLRAKIDMAHPNLLMRDPVMYRIRRM PHYRTGNTWC IYPMYDFAHPLSDAIEGITHSL  
CSLEYEIHRLPYDWFVSNCEVFPSRQIEFARLNITHTVLSKRWLLQLVREKKVSGWDDPR  
MPTIAGMRRRGYSAAGIRDFLGRIGIAKTDSMVDIQLLEHCIREDLNASAQRYMAVLNPV  
KLV IENWPQGRVEWLD AVNNPENPQAGMRKIPFSGTLYIERDDFRENPPPKYRLYPGNQ  
VRLRYGYIITCTGFDKDPATGEVTEIRCTYDPATKGGDAPDNRKVKG TIHWVSADHAVPF  
EARLYDYLF EAERPMEVSEGKTFIDNLS DHSLTVEKRAVAEPALRELA VGQTVQFERLGY  
FCKDPDSTNERAVFNRTVTLKDSWTKLEKLLANG\*

>SPBIB\_v1\_100153|ID:27162304|glxX| Glutamate--tRNA ligase [Uncultured spirochete bib]

MSVRVRYAPSPTGNQHIGGVRTALINYLFKAKSQQGGSFILRLEDTRTRYSEEVVQNLVYDT  
FKWLGIFYWDEGPDIGGPVGPYVQSERLDLYKKYAEDLVRMGKAYYCFCDSERLEKIRQEQ  
IAAKKDEIGYDRHCRYLPKEELERNIAEGKPYVVRKIPLEGVTVFHDRLGRTIEWKNED  
ISPDVLLKSDGFPTYHLANVIDDHLMGITHVMRAQEWIPSAPLHKIMYDAFGWEMPELC  
HLPMLVGGQDGHKLSKRHGATAVNEFRKAGYLPQALINYIALLGCSYEDGRDIYSLDELVS  
LFKIERLNKSPA VFDYQKLEWFNGQYIRQTSDSLALVVRPYLVDAGLRKAQDPMDRLE  
LAAMPLVKERLKFLSDAPVIMSILYKRELPVETFLPKKADAKETAGFLEESKLLSEY  
GLDDIPA VEEKFRSRAAEIGRKLGDLLMPLRVAITYTRVSPPLFESMKILGLKECIERID  
EAIRYLRGY\*

>SPBIB\_v1\_100154|ID:27162305| membrane protein of unknown function [Uncultured spirochete bib]  
MKGESGKTEKSLFTKIQKFAEILIFAVWILAIVLLILDGSEFFRLSMEILSIALLGVGLF  
NVCMMVGFSAAKRSHFQFGLFFIRIAYILLSAASLAISLFVAGIRIR\*

>SPBIB\_v1\_100155|ID:27162306| Histidine triad (HIT) protein [Uncultured spirochete bib]  
MEYLFNFNKIAYLKGKRPQGCILCLIRDGSQDVENLVVYQTERFMVSLNLYPYNPGHLLV  
FPKRHIVDIRQYTEGEKAELDALVPACLDVLDAFGNPSAYNIGYNMGLSAGASIEHLHLH  
IIPRYPREIGIVELIGGSRLVQDPKDTYAKLKELFNISAGGRN\*

>SPBIB\_v1\_100156|ID:27162307| Thiamine diphosphokinase [Uncultured spirochete bib]  
MKALIITGGGCPSSGIIRSLSQGAGLVIAADSGLPCLSDLDPDYVIGDFDSVETALLA  
KIPEERIMQYPEDKDYTDTELAIDLARKKAGDRIVLAGGGAGRLDHLAVRALFERTEPI  
HEWHTGAESAFLPAGEKLFSSSIGTVVSVFPLSKGAEGMSSEGLKWPLDGLRWDCGNF  
GVSNKTIAPNAAISSGRNPILVILPLGIQALISSAS\*

>SPBIB\_v1\_100157|ID:27162308| Polynucleotide adenylyltransferase/metal dependent phosphohydrolase [Uncultured spirochete bib]

MLRYTPLAGMRIPRIDPELRIADSLRAGKKA YLVGGAVRDTFLNRQVTFDIDATNAT  
PEECMQIFPRAIPTGIRHGTITVIPRSRRFKVEITFRTEGSYSDGRRPDSVAFIDDIAM  
DLSRRDFTINAMAFDLSNNHFVDPYGGKDLAAKVIRAVGNPSEFAEDGLRTLRAIRFA  
AQLGFAIEPATLKAIEECHEKLSVSRERIRDEFKSIICAPKPCGIRLLVDTLILDL  
PEILSCKSVPPKNNHHLDVFEHLLATVDAVNPDLSEERLLVRLAALLHDIGKPCNLN  
ISEDDTISFYRHEIESEAIARKTLQDLKYPNEIIDRVCHLVRHMFNYEPGWTDAAVRRF  
VARVGQHAIPDLFALRLADTIATTGEPVSWPLSEFQTRIDRILEEKQAISLRDLAVNGE  
DLASIGIPRNREMGALLSELLEAVLEDQSLNTRAKLLEIAKAKYFNVAR\*

>SPBIB\_v1\_100158|ID:27162309| rnc| Ribonuclease 3 [Uncultured spirochete bib]  
VAGGVKRSKSGSTHTATSTSRLLSLDSFQRRLGISFQNPPELLDIALTHSSFSNEIHINE  
PNNERLEFLGDSVLGLCVAHILYERFPNRQEGDLARMKSVLVSEASLGIAQALGLAEYL  
LLGKGEEISGGRQKQAILADAMEALLGAYYLDSDFFENVKSFIQQLMAPKIEELS VTSGKD  
YKSIIQEYAQKQGMNLPKYELVKTEGPEHARRFFVTCTLAGEIFGPCEGLTKKAAEQNAA  
QYTFEKLHARGGELARMLDVIAAPLPQSTSLH\*

>SPBIB\_v1\_100159|ID:27162310| acpP| acyl carrier protein (ACP) [Uncultured spirochete bib]  
MDELFEKIKKIIAEKLEVDESKITMDASFRQDLGADSLDITYELVYGIEEELGIQIPDEKA  
NEFETVKDAYEFIKTQVK\*

>SPBIB\_v1\_100160|ID:27162311| coaD| Phosphopantetheine adenylyltransferase [Uncultured spirochete bib]  
MLLLTIAFAYSKVCHMSTAVFAGSFDPTAGHLVDVIEGALGIFDTLYVVVAMNPEKDGMF  
TVEERVAMLKAVNTYGDRMKIVTWKGLVTDFAREHNCSVLVRGIRNAAELPYESTMAYMN  
RRLDPSIKTVFFLYDAKHVDISSLVRDLVSHGRLPDGIVPDGVA AVLKDILHARGQPLS  
\*

>SPBIB\_v1\_100161|ID:27162312| Int| Apolipoprotein N-acyltransferase [Uncultured spirochete bib]  
VRLAFIVYSNYMREQMNTSNTYLSEIERGPSAGFSQRILWVAAA VLSALSQPNELFLYG  
NWLAGLVCLVPLYFALTNTKSGEASVLGAVFGALHHALTSYWLFFYKDFAFWTLGTTTI  
AYAVVYGAAIMYGWFMLQHSGSMKPIVFALAWAAFEYAKSTGFLGYPWGLLPYSFTA VPI  
MLQTADIWGVYGISAFALSSAACAEMISSLQVRQSRGNRWWAVAVGYGLVLLAYGAW  
AVAHPWPVRSVRLLLAQQNTDPWISGENAALESNIELARKALDLNRQSGGRKPDLMVFS  
ETSLRRPFTEFRSWFEKNPPTSPLIPFLQQEDIPLLTGLPVVKDWNTYEASNSVGLISPN  
GVLETYAKMHPVPFAEAIPFWEFKWFRSFVQNVIGLESGWVMGDKPVLFKLTLQNRGSV  
CTDIHVLPVSVQFASPICFEDAFAGLSRDVIIRGADLLINLTNDSWSRTKSAQIQHYAVAR

FRAIESRKTLVRSTNSGVTCVVGADGKNIAELEQFKADSIIVDVPIYAVPMTFYIRFGDW  
FALLSASFALVFIWGIRTEKLKRRIL\*

>SPBIB\_v1\_100162|ID:27162313| conserved protein of unknown function [Uncultured spirochete bib]  
LSISNYVSADFFETLEEAGNIVKYREHPAFDAVPFLGSIKKHPYDQEKCLVLLLQPQKRM  
PWFKGGEEIHLKTRDVQALDELPSAIDLGTGTAISVFRIWVKRGAIAVRFEPFEVTDEEYR  
PFDTDSISRLLAQRD\*

>SPBIB\_v1\_100163|ID:27162314| Radical SAM domain protein (fragment) [Uncultured spirochete bib]  
MSASEIARYWRKMPQKKIQCFCLSHACIIEDGASGHCSARLNDRDGEMSLPFYGWISLAI  
DPVEKKPLRRFMPGTWTYSVGFWHCTMNCPCFQNWIEAHPLRIVQEIISPEKLIELAVES  
GCPSISFTYSEPTLHIEYVIEAMQRAHARGLKTILVTNGNVLDQPAHEILAHTDATNVDF  
KTADAGIYKNILGGDIKVVQNFIHVAYELCHVEVTSLAVPGILDSASQIHSIAQTLAAIS  
DEIPLHITHYRPAWKYHKPPLPSEMIQSMMAEAARKHLKHVYAYI\*

>SPBIB\_v1\_100164|ID:27162315| protein of unknown function [Uncultured spirochete bib]  
LTDFADFGIVSIADCTVGVAVQVVECQTVDLVVVGSIPITHSPSPSLGTEPERVRSSA  
G\*

>SPBIB\_v1\_100165|ID:27162316| protein of unknown function [Uncultured spirochete bib]  
MGNFSNGPLAQLAEQQTLNLRVEGSNPSRLISVKALKMLQALTKRRCSATMRHA\*

>SPBIB\_v1\_100166|ID:27162317|tig| Trigger factor [Uncultured spirochete bib]  
MEITEKKIEDLEQSRVRMTLTIPSRDVRAEYDAMMNEYAKNARIDGFRKGVHPVFLERK  
FGDSLKTEAMGRVIEKAVEEGLKDATRQPLTYEPPAVEGEPQFNLDSDFTFSVTYDAYPA  
FELPSLEGIEIEVPAVSVSEDIARELEEIRQRNAIVVEKDGAETGDIVTADFAEIAED  
GTEIPGTARKDFAFELGKQLNIYKFDDEIVGLKAGDEKTFKTFPADFEYSEYAGKTVTI  
KVKVTKVKRQDLPELDDELAQDVSEKYKTLEDLKA AVRNLNEALEARLRSTKENAIVDE  
LLKRTSVSIPRSMALAEAMRWESLKQQMGVDNDERLEMLLRISGKSRDQLLQDWAPLAE  
KALASRILLDKLVEAGSYTATDEDVDAEIAKEAAHTMSPAIEKAEYEKRGRTLEYLKDDI  
KVRKLFDAILASAQVKEGTA VSYLDFMKENQ\*

>SPBIB\_v1\_100167|ID:27162318|clpP| proteolytic subunit of ClpA-ClpP and ClpX-ClpP ATP-dependent serine  
proteases [Uncultured spirochete bib]  
MSEHMSSLVPIVIEQTGLGERSYDIYSRLLKDRIVFIDGEINDLTADLVIAQLLFLESQD  
PSRDISIYINSPGGMVTAGLALYDTIQYIKPEVQTICIGQASSMAALLACGTKGKRSAL  
PSSRILIHQPWGGVSGQASDISLQAREIIRLKKLTIDYFAQHSGQALEKVAQDMERDFYM  
SSQEALEYGIIDTIMEPRKHGKK\*

>SPBIB\_v1\_100168|ID:27162319|clpX| ATPase and specificity subunit of ClpX-ClpP ATP-dependent serine protease  
[Uncultured spirochete bib]  
MAKNKQFDLEQETYCSFCGKSSSYVRKMIAGPGVNICDDCVRICSQILDEEEQKVTAEFL  
TEVPKPREIKEFLDQYVVGQEQYAKRVLVAVYNHYKRLHLKVSATAPDVEIEKSNVLLIG  
PTGTGKTLARTLARKLKVPFAMADATTLTEAGYVGEDVENILLKLIQNAGGNIQAERG  
IVYIDEIDKISRKSENPSITRDVSGEGVQQALLKIIEGTIANVPPQGGRKHPNQEYLRID  
TTNILFCGGAFVGLDKIIESRVSSHMPMGFGADVRAKHEKNLSQLFAELQPDDLIFGLI  
PEFVGRLLPIKVALDDLSKEELKRIIEPRNALLKQYKASMKLDNAELEFEFEAIDAIAEK  
AIAQKTGARGLRRAIVEKIMIDIMYSLPSDSNVKKVILTRDAVEGNGSCIIYRQKTA\*

>SPBIB\_v1\_100169|ID:27162320|thiB| Thiamine-binding periplasmic protein [Uncultured spirochete bib]  
MMRRKPLIAIFLGVGAIFFASMSLWGQTQPSAGAGAPELVVWYDSFVSEWGPAAQIAEG  
FQKQSGAKVRFVSKGDGGALFSSLLDIAKKPNADIVIGLDDRQLEKALTSDFAPLKLVN  
LADIQKDLLDPSNRLVPFDGQFAFIWDSSESNIEPPRSLEDLTKPIYRKKVIIMDPRTS  
TPGLGLAWTQAVYKAGWRDYWKRLSPSILAMTPSWDTGYGLFTKGEAPLVLSYSTSPAY  
HKAYENTERYKALKFSDGHPQQIEFAGVLSTSQNKLLAQKFVDYLLSQECQSFLPETQWM  
FPANRSKLPASFSVSKYPSVNAKVQDIDRDPDAANILISSH\*

>SPBIB\_v1\_100170|ID:27162321| putative ABC-type transporter, integral membrane subunit [Uncultured spirochete  
bib]  
MQSGNGSFEQRLGKTEIILSIALIAILSFSLAPLVAFKNAIVGAGHASLLASLGSISVP  
VIVRSLQFTLLQAFASTALAIIGLPGAWLAAFRFPGRALLALAAVPCFPPIVILA  
FILYYGKEGYFSAFLALVMGQKNEYRGLLYSFWGLVLVHAFYNFPIAVHQISALWMRIPE  
SQKEAAKTLGANRIMAFRTGTLPWLLPGIAQAAGLIFLYCFFSFTTVLVFVGGRTGSTLEV

SIYQALRYQANAGLALLFSVIETGFALLGIWFITGMTQKKQHALRDFGRRRELSSPKGSQ  
RVLLAIYGILLIFFIGPLVSIVVEAFRVPASLGGASHFGFGNFERLLKGFQAPLLKAIR  
ATLTLSGSAALLATIAGVIAGISVFIGKKAGKLHFTNRIVEALQWLPLAVSPA VFAYGWL  
FLSPDR TISAALIAAQA VIA WPFV SRAVSASLQSLDPRMREAGRTL GASPLRAFLTIDLR  
VIAPSVAAAAFAFSITAGDVNVPLMLGMSEIETLPLLLFRLTAA YRFNEACAAGLVLGL  
MTGIVFFLKEKAIDVA\*

>SPBIB\_v1\_100171|ID:27162322| putative Fe(3+)-transporting ATPase [Uncultured spirochete bib]  
MSLEVRNLEVVRDGFVLKADFALQDNKVLVLLGPSGCGKTLLRAIAGLEPIKQGEILLK  
GKRIDALPTEKRHIGFVFQDLALFEQMKVRDNIA YSLQIRRENKAHIKERIDYLAMRFRI  
DHLLERYPSELSSGERQRVALARALASDPSLILLDEPLSALDAPLRREMRRFMRVQLTQG  
YLTAIHVTHDVEEAIDLADEIIVMRNGNMIARGTISDLENSPGSGWLARFMNFGLTLHVD  
AVSRKKGANL VMAHCKAGDILCSAHDTAQSAQIESGASYCVYVPFSSLSALDSKKVLARA  
PGGILHATIVRCIGILSSTMKLLLSLGENEQFFEMTLAMGGGILVPKEGSEIELEVDPA  
KCRLLPEEPRLPKA\*

>SPBIB\_v1\_100172|ID:27162323|aroK| Shikimate kinase [Uncultured spirochete bib]  
MKIALIGMMGSGKTKIGQLLAAHYGIDFLDLDHIIQRVGLSISEIFAQKGETEFRKIEE  
STLAEVVGLGKPLVLACGGGVVLMPSNRELLESECITVWLDVPLRELARRLAGEKDSRPL  
LASSNWQETLKEIYDARHMLYKETASIRYVWKENC SIDTSIQRIAQLIDSKKA E FQRTS\*

>SPBIB\_v1\_100173|ID:27162324| Membrane dipeptidase [Uncultured spirochete bib]  
MTEQSEDFVVIDAHCDTLMALNGRSMNKKETDPRDFADNPDAHIDLPKLLRGNVRCQVM  
AIFLEDNQLANAPEETMHMIDIFDEVCKKSN GAVCLATNAAEVRRRAINEKKLSALLSIEG  
AEALGSSLDMLDTYYGRGVRAIGITWNRNRAFRGRGLRGE GEGGLTPLGKQLVEKMQLVLM  
LIDVAHLSEEGFWEVADIAGPFIA SHANARAVLDHPRNL TDAQIRAIADHGGAIGCVFV  
PSFIAKDPNDSNLEAFLHVDQVVKAGGIESCAIGSDFDGFPIDASVIRNTSEFPLLYE  
GLRKRGYSHGDAAKILGENWLRVFDEVLS\*

>SPBIB\_v1\_100174|ID:27162325|uvrB| excinulease of nucleotide excision repair, DNA damage recognition component [Uncultured spirochete bib]

VKPFKVVAPYGPAGDQGQAIESIVNALQNGERYVTLKGV TGS GKTFTMAKVIEAIQK PAL  
VISHNKTLSAQLYREFKGFPPENAVEYFVSYYDYQPEAYVPSKDLYIEKDSDINEEIDR  
MRLAATAALMERRDVVIVATVSCIYGLGSPDLYRDMRLYMDKGSTVDLDEIKRTLVS LQY  
ERNDMVLERGRFRIRGDVLEVFPAYLEEAYRIELDFDTVVRIRRLNPVTGEAHDELEEAV  
IYPAKHVMPENMVQRAVERIKAELEERHRFFLEHGKYLEAERIKARTEYDIEMLEEMGY  
CTGIENYSAPLSGRKPGERPGVLLDYFPKDFITFIDESHVTL P QIGAMYAGDRSRKLSLV  
EYGFRLPCALDNRPLTIAEFESIVPQTVYVSATPGEIEFKRSKTVAEQIIRPTGLVDPEI  
QVRPTEGQMEDIYARVRERAQIGERSLIITLTKKMAEELSEYLSGLGLRVRYIHSEIETI  
ERVEILTQLRAGEFDVLVGINLLREGIDLPEVSFIAILDADKIGFLRSATSLIQIIGRAA  
RNAAGLVVMYADTMSDAMRKAIAETERRRAMQTQYNKEHGITPQTIHKKVQDILERHREE  
KIEASQDELALLKRTHNIFVPEQRKAMIREMEKLMFEHAKNLEFEQAALIRDEIAKLG N  
RDV\*

>SPBIB\_v1\_100175|ID:27162326| Peptidase S1 and S6 chymotrypsin/Hap [Uncultured spirochete bib]

MKLYSRTQIIIAVIVSVAITSLSIAGIVLLLNQPSRPKVSSSSSAAGAINMPAAQQGAA  
QNGTASGLTAISPVPASAEAKSANLTQYLSGYSPEETENISYIYKYNESVVNITTEVLG  
INWFLEPVPQSGSGSGSIIDERGYVL TNNHVVEKAYKLYVSLSDGSRYEAKLVGADPES  
DLAVIKFTPEPGKCLKPVPFGSAKNLKV GQKVLAI GNPFGLERTLTTGIVSGLGRPIQKD  
ETLILQNMIQTDA SINPGNSGGPLFNTKGEMIGINTMIYSPSGG SVGIGFAIPVDTAVRI  
VPQLIKDGKVRRGWIDMQAIQLFPSLVDY LKQSGKGAPVESGLLVSTVTQGGNADRAGLK  
GGNMAVRYGSTVFYIGGDIVVSDGKPVTSIAQLYSALEDSSPGQVVVEFYRGTKKMST  
TITLSERKK\*

>SPBIB\_v1\_100176|ID:27162327|yvcqK| Cob(I)yrinic acid a,c-diamide adenosyltransferase [Uncultured spirochete bib]

MSIVTKTGDDGSTGLWSGERIGKDSL RVEAYGTIDELSSALGMARHLCFQDNVLYAIEYI  
QRLFRVAGELASLGTSFDRPITEEDEKTIEAKTSEIEARIPLRGFVVPGMTQGSAA LDI  
ARTIARRAERRVVALSRTDEISPVLLR TLNRLSDFIYMLAREEEAAQ GK LTFV\*

>SPBIB\_v1\_100177|ID:27162328| putative Arginyltransferase [Uncultured spirochete bib]

MYNEFKAGIRYASRCKPKTKAYKETSMLSSRQSPIQFQTR SICQYLPDHRPSLSDHMIFA

PSVDPALYGSLISHGWRRYGRELYRMACPGCNICIPLRINA EKIRLSSSLKILRLNSDL  
QIVVKPPSFNAEHFELWKSYSKLGKHFSGPGDLTEEVYCYGLFEPWSLILEYREMAAQNRLV  
AVSHLDPLPDGISSVYFSFAPEAKDRSLGFFSIMAEAYIATSAHLLNGKLVSIETA AVV  
SYYSNRENTKNSGWY YLGFVWPGSPKMEYKARIAPFEIALPEWHEFGSRLEALEYL RDV  
RMPGLGPFLQI\*

>SPBIB\_v1\_100178|ID:27162329| putative PpiC-type peptidyl-prolyl cis-trans isomerase [Uncultured spirochete bib]  
MASSENKKQTTNNGKSPIEKKAENKKTESLKRNFNPFVYIGTIVILVLTIIAFVLIPG  
VSTGTSSGGQAPSGFTWNGKRIEYSSDSYFADQVSQINDYLKQQGMDQSQSQLYAYQVWR  
LAFQNTVVRTALLDSAKRAGMKVSEQTIDEEDIAKDVQFQVDGKFSLEKYNKTPLATRLSI  
RNRLRDDMLIQNYGDLMAVAPSTAEIEFVSSMAKPQRSIQYVDISYANFPEDKTIEWAK  
ANESLFRSIGLSKITITSSQKDAEKVLSQIKANSLSFEDA AKSHSKDSYADKGGDMGTRI  
FYDLKNEFQNEKDADAVMALKKGEISPVYKISNNAWAIYRVNSESSAPDFSKQSVLDEVK  
SYLFDREKSVMESWALAKADEFAAEAPKSSFAQA AKKTGLEAKTAGPFILNYGKPSFYFY  
GQQVGLFQEPYRSLDNDLVGAENETFLTTLFSTPKGAIKPVVLDASVVVMTVTGDTEG  
TEQETS YTKFA YPYFFQTALESQIRNTILSSKKLKDEFNTTFARLFTPAAK\*

>SPBIB\_v1\_100179|ID:27162330|lepA| GTP-binding membrane protein [Uncultured spirochete bib]  
MIEPSRIRNFCIIAHIDHGKSTLADRFEIKAHLVDLRKFQDQMLDNMDIERERGITIKSQ  
AVSLPYTAKDGQTYMLNLVDTPGHVDFS YEVSRAIAACEGAILVIDATQGVEAQTLSNMY  
MALEHNLEIIPAINKIDMPAADVEGVRRQIEKDLGLDGDSALAVSAKLGIGIDELFEAIV  
ERIPAPEGKPEDSLQALIFDSHYDPYRGAVVHLRLKQGTIKKGMHIRFMSNGIVHEVEEV  
GHFIITATPSEMLIAGEVGYCIAGIKTVKEVHVGDTLTDDHEPCA HPLPGFREV KPVVFS  
SIYPIDSADYEELRDSLEKLVNDASLIFEKDHSLALGFGFRCGFLGLLHLEV VQERLER  
EYNQSIHMTAPSVRYKILLKNGTTVYIDNPSEYDPARIESA EEPYIRAQIITPVDYVGN  
VISLCLSKRGTQQSFTHLDEKRVELVFEMPLAEVLFDFYDKLKSTSRGYASFYDITGYK  
PTELAKLDFLINGEPLDALAMLVYKQSA YERARLICERLRNNIPRQQFKVPIQGAIGGQI  
IARETVNPVRKDV LAKCYGGDITRKRKLEKQKEGKKLKRIGNVELGQDVFLSVLRASE  
EEER\*

>SPBIB\_v1\_100180|ID:27162331| Glutaredoxin [Uncultured spirochete bib]  
MNLQNLPPVAKDGSRADHEIMVYALSTCGFCKRALAFLDAHQFA YRYLYVDLIPIDTKNA  
IKQELKQRFKENVAFPFAVIDDKKYLIGFIEADWKMTLGV\*

>SPBIB\_v1\_100181|ID:27162332| Ferredoxin thioredoxin reductase beta chain [Uncultured spirochete bib]  
MANQKTREQTIIFTQMVAKKQGWVLPD TAFYNSLVDGLTQNYNRYGYHHCPCRDSEGSR  
ELDAPAICPCVWSKEDILQYGH CYCALYLSKEFAASGKEPQAIPDRRFKK\*

>SPBIB\_v1\_100182|ID:27162333| Aminotransferase class V [Uncultured spirochete bib]  
MTQPVYLDWAATTPADPELMRRALELSLAAYGNPSSSHWAGKQANSILEESRTRLLGALG  
MKQGS LIFTASGTEADHIPMLALLKHFNRVASQGKKIHIIISGIEHA AIDCQARMLQKTG  
IEISWVAPD TYGHIVPEAVASHIRKETALISVMAVNNETGAIQDIRAVSTLIDDAARTLK  
IKKPWFHVDAVQMLSKLPVAEYCMGADSI ALSAHKIRGPKGVGALWLGRPLESFVCGGGQ  
EKGIRPGTENLFGALAFSLAGEKAQQLLET YVAHAQSLELRLLEGVARIKGAVVPERKP  
KDNGFVPSIVSLSPFGVGETMVRALS DRGIAISTGSACSSRHKEKGRRILKAMGVPEDI  
SFSSIRVSTGILTSEHEIDIFLEQAEDLYRTLKT\*

>SPBIB\_v1\_100183|ID:27162334|thiI| putative tRNA sulfurtransferase [Uncultured spirochete bib]  
MRTFFLIKPGEIELKLG NRREFVHRLKEQIQKRLHGIHFDLEEY PGRFFLSVEEKDT DFA  
LFVLQHCPGVNGIAQAIKSEK RTERILKAAIEIASKEAARGARRFKVETRRSDKSFPLDS  
YGM SAAAGDAVTQALSSLSVDVHNPDFIIAIEIRERAYIYASTSPGPRGLPVGSQGGV L  
LLSGGIDSPVAGYMMARRGLAIESVYFHTY PFTSEE AQKKVEQLARRIAIWTGSMHAWIV  
SFTEVQLKIKKGGREEANTLMLRMAMMKAADV IASRIKARAIVTGESLGQVASQTAENLR  
LSQSM TSLPVL RPLIGIDKEETIATARRIGTYTISILPYEDCCVLFSPKHPVLKPDFEDL  
RAYFSSLELESEILKAVDKAEKFFSFGDALREYGLDAYAEFWNAGGPRA\*

>SPBIB\_v1\_100184|ID:27162335| RelA/SpoT domain protein [Uncultured spirochete bib]  
MSDIENSIPDKAALAEIYANNRANYEEALARA VHDISKLLQRRGIHPTIKSRIKDFESLF  
AKKIRLLKTA WDEHRDPLPNDV LAMRIICPFLRDLDEVENALAEHYEIIIEIERKGGQDRS  
FREFGYESIHVLVHIPPELQPLCKGLERDVIEIQLRTILQEAWAEVEHEL VYKAEFTPFD  
EPLKRKLAALNATLTLSDIIFQEILDYQK KLNDA LKRRREAFYGKIEQASAKVFGIEEEL

SSTIPRPVRLKKTSGKAIPEARSNQDRWASLDDITLLLSALDAHNASDFDA AISIYTEIL  
SRKPEATIAAVVYKHRGMAFFAQSDYPDALSDFTS CIMLDPECYKAFYYRGVVKSIQGEL  
QQAIDDFNKALEIHPYHFFSRYRRALCWWQLGDYVQAHADCEIALRIKPENKLAQELQKK  
IGEHLARDEI\*

>SPBIB\_v1\_100185|ID:27162336| protein of unknown function [Uncultured spirochete bib]  
MSTDSTRRHAERYVIAALILGAVIFILLRGPILQFNGMRLYFPDEKQNLKLEMRHIPI  
GSLEEKASDVIRELLGLPLTRNLQPLVHSDISLLRVVAGKNSIYLD FSTVSLEEISASYK  
LFKEAIEKSLHETIPGNYHVYIYINSILTR\*

>SPBIB\_v1\_100186|ID:27162337| Cell wall hydrolase/autolysin [Uncultured spirochete bib]  
MIVARRRLKGRGLWQTRRALVVLILSVTWFNPAFAAEPAEKDITLSSLAQSLNAMLEY  
DPLTRSGTLEKNGKTARFALDTPYVLFWDWTALKTLPPPVEDQDSIRVKKEFDIALRQFFD  
TKQAPLSKYSVKAIVIDPGHGGKDPGAIGEFENFKIQEKDVNLAIAHRLAELLRIRYPER  
TIQLTRTDDTYP SLEERVDMANKIKLAETEAIYISIHANASFNKNTHGFEVWYLNPSYR  
RTVVDEQTAKEKEDIAPINTMLEEEFTTESILAQKVYQRMGKMIGDQSPARGIRAE  
WVVRNAKMP SILIEVGFVTNKNEATLLSQAGYLRIADAIYNGVCFIEHFEY\*

>SPBIB\_v1\_100187|ID:27162338|nrkJ| Vitamin B12-dependent ribonucleotide reductase [Uncultured spirochete bib]  
MKIKRLFTKAGRGPYEGIEWEKRRSEIRNPNGTSVFSMDSVIVPSFWSPIASDIIAQKYF  
RKAGVPKDKALDWTKFVPSSQTTLSEADVGDSEHDARQVFHRLAYTWCLWGRQANYFDT  
DEDEKAFYDEICYMLAHQIAAPNSPQWFNTGLHAVYGIEGPAQGHYYVDPATNQVVKSES  
AYQRPQPHACFILDVQDDL VNEGGIMDLVTREARLFKYGSGTGSNFSRLRGANEKLSGGG  
VSSGLLSFLKIADRSAGAIKSGGTTRRAAKMVILDADHPDVSEFVRWKTEEEYKVA CLAA  
GSAMLNHYADEMVAIEDMGADDENS YLLDRNILLRKVVKQALDAGVPSSWIHQVLT FYS  
QTGKTPRLPL YNTAWESEAYNTVSGQSSNSIRVSNAFMQAVIDDLDWDLIARTTGSPFR  
KVKARELWNEIAEAAWLCADPGLQFH TTVNEWHTCIADGEIRGSNPCSEYMFLDDTACNL  
ASLNLISFYDEKTNTFDDAA YRHAIRLWTIVLEISVAMAQFPSKEIARKSYDYRTLGLGY  
ANIGSLMVMGLPYDSKGR TVAAALSAILTGESYAQSARMAKEFGPFARYNPNKDHMLR  
VIRNHRRAAYNAAPQEYESLSVLPKGIEAHLCPENLVKAARQSWDEALELGEKYGFRNAQ  
VTAIAPTGTIGLLMDCDTTGIEPDFALVKFKKLAGGGYFKIINTS VPPALRSLGYSEDKI  
GDIIAYALGRGTLEGAPGISRESLLEK GIPESALLKA EKALQNSISLEGCFSPYVIGYDV  
LEKLGISKEEADVPGFSLARLGYSENDIEAAELYACGTMGLEGAPHLAEKDLAVFDTAT  
PSGKRGRTRISWQAHIAMMAAVQPFITGGISKTINMPNNVSIDDVKGAYMLAWRSM LKSI  
ALYRDGSKLSQPLAALAPGSDLIAD SIVALQTNQLSESAASQAADNTAGSTIPARLQTAP  
EPELPGMPFAPRGIRRALPNRRKGYTQKAKIGGHSIFLRTGEYEDGALGEIFLDMHKEGA  
AFRSILNSFAIAVSLGLQYGV PLEEVDAFTFRFEPNGMVNGHDY LKMATSVLDFIFRD  
LAISYLHRYDLGQVKPEDLISTSTQSILDKGSQAFESGKKQTPAKSENVVSEPRPKKPSA  
AAPAPAKDQTVLLIRAARQKGYEGDPCPVCGNLTLVRNGTCLKCETCGSTTGCS\*

>SPBIB\_v1\_100188|ID:27162339| Arginine deiminase [Uncultured spirochete bib]  
MESVRIDSEIGKLRRVIIHNP GSEIEAMTPREAERDLYNDIPLFAVQREYAKLRDFLHK  
VTKTYELADLLAECLANENDKLEFLKEYSHINPIAHIVDQLALLPAQQLAQSLLAGIIP  
KESLAQHLNPHSFIANPLPNAYFMRDSVAIIGNQVISA AFTFDVRMAEAYITRFIFK KHP  
AFRNGLLDIDGPAERNRLFTIEGGDIHVLSSDVLAIGISERTTAF AIDRIAQRIARAEAR  
PMTIFAIDLPKERATIHLDMVFTMIDRNAALAYKPVMLGAGRAQVYKLDVQANGSVRYSE  
EKSLFEGLRGV GIDLEPILCGNGHSVFQEREQWLSGANSFAFGPGKILMYSCNAYTLEAL  
NAKGFAILPAQDFLDGKANPDDYARLAVAFDGIELARGGGGARCMTLPVERDSL\*

>SPBIB\_v1\_100189|ID:27162340| conserved protein of unknown function [Uncultured spirochete bib]  
MKKRKIIIIGAAGRDFHNFNTRFRNDESVEVIAFTA AQIPNIDGRKYP AELAGPLYPKGI  
PIFAESDLPNLIK NYEVDECVFSYSVDPYSHVMKLSAIVNAAGASFTLLGPKDTQIKSSK  
PVIAICAVRTGSGKSQTSRKIVQMLMKRGLKVVAIRHPMPYGD LVKQKVQRFATIEDLAR  
HNCTIEEMEEYEPHIARGNVYIYAGVDYEA ILREAEKEADVILWDGGNND FSFYVPDLMIT  
VADPLRAGNEVSFYPGEVSLRTADVVIINKIDSASPEQIQIVRENIARTNPAALVIDAAS  
PISVDHPELIRGKRVLCVEDGPTLTHGMMKYGAGIVAARKFQAAQIIDPRPYISGELIKT  
FQTYPEIGTLLPAMGYSTTQTRDLEQTIDRTDCDA VIIATPIDLNRVVKIRKPTVRVGYD  
LQEIGKPD LNEVLDDFCARHKL V\*

>SPBIB\_v1\_100190|ID:27162341| conserved protein of unknown function [Uncultured spirochete bib]

MAQQQFCSNKEGAMHIEFSFPVKS DIKPRAILSLKDAGDMTYKPKSESPSRLAFFDRFGI  
EPTRIAGIELKHSRNVAFVESIQELSHACAANRDGFDGIITNPWL VPSITVADCMPIWL  
FCKECGAFGLHSGWKG TGILKTAVDGMTNRYRCNPNDISVIFGPAIGSCCYLVDEKRAR  
AFKNEFGSQAVDEHMRNGTRVFYLDLLAANLAI AEKIGIGSFFASG SCTSCDGRFGSYRR  
EGASSFTRMIALCIFGNAEAENRQRSM\*

>SPBIB\_v1\_100191|ID:27162342| protein of unknown function [Uncultured spirochete bib]  
MPFSEQKEPSIITIAHGAI AVFKPAGWHSV FQGVELKSPRALNERSAADFEDMVS WLSSH  
ADLLPASELKDAKAWQARFAGLQAQVQPKAADRFLSELGMLYRLDRETSGIMLFALDRA  
TMESMRAAQNAFMLKKRYILMSEASDIELAGSLPRSRSAEREVLLSALYEGNTMPIVSYF  
RSYGPRGGLVSCIEPSFRLKAKKKITKDRYQTDLSAAKPMQWPAAGAICIEAEIRKGFRRH  
QIRAHCAWLGLPIIGDLQYGGGSSKRLWLEAFSVSLMDGRQCVAEWKLHDGPTAILQQ\*

>SPBIB\_v1\_100192|ID:27162343| ABC-type multidrug/protein/lipid transport system, ATPase component [Uncultured spirochete bib]

VAEFFDAEPVTKGYDSQITRILAYLKPYRLFALIVLITLSVSTAGELLSPTLIRQAVDE  
ALVREWYGLDPSAASRFRSKNGSREIVINNRIYVRTSQLAGITEKERTAMEKQGLLDASP  
SYIFPLEPDREKKEALALRYSQITISGVWGIVPYSLTSLSPDDAYLLRSQDSPVLGHYA  
LLLLLVL SIVLLSTFAMTWYTNHIGTLIMKDMRLQYRHHVIEQSLAYLSRQPVGRLVTRL  
TSDIEVISQFFTDVLSAFIKDATIMLGLSVLFLVFNWKLGLVVFATVPLIFVAAA IARVK  
ARDAFRNQRYWTSKVNSFLSEHISGIDIVKLFVQEKR VSEKFGENNRNLLKANIAEMYVY  
ATFRPFVDFMSTIASALAIFFGAILFLRLDISIGTLIAFINLISMFYSPIKDLSEKYILL  
QSAMASGERVFGLLDSDDRLEQLPVLADKEAPS VIRGHIELSNVWFAYKNEEWVLKNIS  
FTVNPGEKIAIVGYTGAGKSTIANLLARFWDIQKGAILIDGVPIGQYPLKRIRKFIQVPV  
QDVFLFQGSIRENIALGLDLSQEQLETA AKAVYAHEFIMALPKGYDTLLSEGGLNLSLQ  
RQLISFARVLAHEPSIILDEATSSIDTETEKLLQK GIEGLLKDHTSIVIAHRLSTIRDA  
DRIIVLGQGHVVETGTHSELIERRGLYWNLYRLQNREME\*

>SPBIB\_v1\_100193|ID:27162344| ABC transporter related protein [Uncultured spirochete bib]

MFKEYATLLPHLKQYRFRYIAGILCLIAVDASQVLIPRYMKT AIDTIVSGSFQLREIVQP  
LLIMIALAVLISVGRFFWRYFINV ASRRIEAEMRDRLFAHILNMSGGFFRTNTTGDLMAR  
ATNDISTIRQATGMGFVALVDGVFMTAMILVAMFANNARVAAWIILPLPLITALILLFGR  
IVGKLFKKIQDIYGRLSNIAQESISGIRVVKSFVKEDYFFGRFAQANSEYKNAIMDLVKT  
SGFFFPFITFLAGLSTVLLVLFGGNASIRNKMTPGSIIAMLSYLEMLVWPMMSAGFTVNI  
VQRGAASLKRINEILNTKPEIPESKNLVN GEPLGDIEIRLSYAYPGSSRMALENVSVHI  
PHASMLGILGKVGSGKSTLLKMLPRMLDPGEGHIFIGGTDIC SFKLDTLRAAFGMVPQES  
FLFSDSIRANILFAAPGLDSARFEEITRIAGLDRDVS LFPHGWDTIVGERGITLSGGQKQ  
RIALARALANPSILLDDALSAVDGETEERILSALLEERAGKTTLV VSHRISTLRNADQ  
IIVLDGGRITQKGTHEELLEDSEGFYAKIAALQQL EQESCASC GDAGSGEALGEEAAGG\*

>SPBIB\_v1\_100194|ID:27162345| rnhA| Ribonuclease H [Uncultured spirochete bib]

MQEKSIVVYTDGGCKGNP GPGGWAYIMRFGERYREAWGGELQTTNNRMELTAVIRALSFL  
KERID AARASCIRRYIPLPAWISTPIHIFTDSMYVKN GISGWIHDWKKRGWKTA AKKPV  
NRDLWETLDILCAELNPQFEWVEGHAGNPDNEHCDTLV GQAVEELLQHVAPAVYHESEKE  
EDLATDAPL\*

>SPBIB\_v1\_100195|ID:27162346| conserved exported protein of unknown function [Uncultured spirochete bib]

MKKITFAGALVVALIVSSCASTPSIPEWVSQKPAPDARYTYFV GSSSAPDSATAANDATA  
SLIAGIMQYMGVSVSVSSSAEARASLDDYQAQITQTVKTESKGR LAGFEVVEKYIQKDPK  
TGQYTVHVLARYETKELQKEKARIEAIFQEERDAVAIPEKKGDQA ATEGRLMDAIRSYAE  
AMSAAGGSNLEN AKIKLERNAKKASELAASLKL TIVSESSLVALGSKLPASKVALISNS  
GGMKQRVAGAPLLV TYPKKLASGRVGTGMQVFTDTNGVT AFEVPPIDIAGNYRVAIQLD  
FSSISDLLSSLPSWALPYSDAVENELSGIVAYLNYKVISTAKNVPMAVAAYLKDTESARN  
ADPAVFLSGLKETLLKEGFSLSDAKLPSGYQTPIDLSVLRAIAPADAQR FALASLDV KSI  
TKDGSYFIATAEGSLGVFELASGRTLYSATKSAQGMGLSESEAVSNALKTLG SQAFGKDL  
LSALP\*

>SPBIB\_v1\_100196|ID:27162347| conserved protein of unknown function [Uncultured spirochete bib]

MRVGKFLALMAVVLVISC GTKPLRKGEVLIEDKGTAYGIKTPK WVELAIIGGYRDIEK  
LPDYKDKVVFIAQFEAQNLSAQLLAERMQADTEIARYLSTRVKDAFKGANVADADSKNF

GAYGERFVASVGEAKFSGYRMEADWVVKVQTYTPENKPKDKQIYRVIQLWAIEKGMLQKQF  
DILFSQLAGTAQPTPEQKRAIDLQNTVTKDFFGENK\*

>SPBIB\_v1\_100197|ID:27162348| conserved exported protein of unknown function [Uncultured spirochete bib]  
MSDNTNVMKKKKYFALVLAAYAIAALLIGCASKPASPAVSAESQQAQKNIVQSTSTPDMPA  
TPPAPSPSAQDPSAAAKSVVGSQPMGQAQAPGAVPGTPQAGTASYEALTPDESHFLQNY  
LGRLSYL VYYNEASGLDPQLAKAAVSQANRYLIEKLGLSVIDFDQIQKNKKDQMSAYQAE  
TGGSIDIIITYIAQKLNADVVEIDAKTSYSGGPGNWSGSAQGS MKIFDASTAALLGSISF  
MSPQTFSPVSADAAMMNAIAGIVWQSMPKVTEQSKALMSASVSRGVRYELVLQNTPDAKA  
ISQFEKNLSKKVREIERLSYAPGETRFALYAFMPASRIQEAIYDAAAAAGYPCYLLYMR  
GRSYTFNTGL\*

>SPBIB\_v1\_100198|ID:27162349| conserved membrane protein of unknown function [Uncultured spirochete bib]  
MRRQKTSYIIVAGIILFSFHAAPFVSPQNASRPEMQGTFTETGCNHCDSFLYIQKPRLE  
ETYGIHIALETHDILSTKGYELCVEMLEQRGLKFTVFPVLFIGSNVYRGSNAIEENMPKE  
IEYFLSHGSYMPTIRQTDQSALAAKNSNAFAASALPTIFAGLLDGINPCAFSTMLFFLS  
FMALKRKDQRSLLWVGLAFIVSVFIA YFLIGLGLL GALRKYLSENRF SIYINIFISAIAA  
IFAVLNVRDAIAASRGRAFDSVLQMPFFKQLNHRFIRYFNQLPL YILGAAISGFLVSFI  
ELACTGQIYLP TLA YMNQSMRSSKSILLLLMYNLA FILPLSLVFV LFFFGLRHEKIRHWY  
GSHLALVRLLSAVFFVALAVLVWAS\*

>SPBIB\_v1\_100199|ID:27162350| putative Maf-like protein TDE\_2348 [Uncultured spirochete bib]  
MYGDPILLASESPRRASILESLHIPFITVVPRIDEQIFDHLDPGERVVALAATKARRGKE  
RWIEGKKLYSDPLPEPMEKPAEPRFALGADTLVAFRTPEGWHTIGKPIDEQDAYAMLTME  
AGNRQYVFSGLCLDMENDVPHVALSVSEVQFSPMSAADI AWYINLGEWKGAAGAYRIQG  
AGSYFIEDIKGSFSGVMGLPIRELYGILRQSGYLSSEEIQG\*

>SPBIB\_v1\_100200|ID:27162351|rpsB| 30S ribosomal protein S2 [Uncultured spirochete bib]  
VAVVTMKNLLESGVHFGHQVKRWDP RMKKYIFAERNGIHIIDLQKTIQAIKEAYDAVQKV  
VSSGKTVLFGTKKQAQSAIQKEAERCEQFYVNSRWLGGMLTNFSTIRKSIQRLKKIERM  
EVDGTFSSLTKKEIASLLKEKTKLEKNLGGIKEMTSLPGILFVVDTRKEAIAVAEAQRLG  
IPIVAIVDTNCNPEGITYPIPGNDDAIRSISLFTQIIANA VIEAGASEGLKIIETLPAEE  
EQELAPPAKTEEDEVEIDLETYSNVPIAQEKEPEEPAEVEAPIIDEDRLYEEN\*

>SPBIB\_v1\_100201|ID:27162352|tsf| Elongation factor Ts [Uncultured spirochete bib]  
VEIKASDVKALRERTGAGMMDCKKALTESNGNFEEAEKLLREWGMAGVEKRAGRATNEGR  
IFVAQNESELSLVELACETDFVARNKDFIDAGTKIAATALGQKASSQNESLESMVKDIAS  
LIKENIALKRVA YFNAGMNEHLH SYLHGEGRIGVVVKFRASDPNAFKNEKVASFVHDVAL  
HVA AAFNPMFLDESKVPASWLAEQKDIFQKQVELDEKMKS KPAKVIEGILAGKVKKLLSEV  
CLMNQGFVRDEKVS VADALAQISKETGFS LAIVDYYFAKVGQN\*

>SPBIB\_v1\_100202|ID:27162353|frr| ribosome recycling factor [Uncultured spirochete bib]  
MESIKAA YEERMKKT V SALHDEFNAIRTGRASPALLDKVRVDYYGQKTPLSQVATISVPE  
ARLVIQPWD RSLFSEIEKAILKSDLGLNPSNDGKVLRIAIPPLTEQRRKELVKTARNIA  
EQSRVAIRNIRRDGLEELKQLQSAGGVAEDAVKKEETELQKLT DAYIAQIQILETKERE  
IMEV\*

>SPBIB\_v1\_100203|ID:27162354|ispU| undecaprenyl pyrophosphate synthase [Uncultured spirochete bib]  
MNENRVPSHVAIIMDGNGRWAKARGLP RTEGHQKGLEAAKRIVLAARKEGVKFLSLYTFS  
TENWKRTTQEVGFLMSLIRVHLTKELDFYRENEIRIVHSGDRAGLPGEV IELD KAIEDT  
KHHHALTVNLAINYGGRDEIVRSVQRLCRTDSPHIDENAIQQSLDHPEIPDPDLIIRTGG  
EMRLSNFLLWQSAYS ELYFSPKYWPDFMPEDFHAALADY AHRERRFGAAH\*

>SPBIB\_v1\_100204|ID:27162355| conserved membrane protein of unknown function [Uncultured spirochete bib]  
LNANTRSRLLLFFGGIPLFALV LFFLPFGHYALLALLVLAVQYLSSLELRAML RKSERAD  
PGNFVTIVGLVQSLAVYIACVAGARPLEAAAVMFLISILCLMIVLSPIAFS KKE SFPLLL  
STAGSISLAHFYTGILPGFLMLIVAGFPDAKNAITFALLTFGNDSLAWLFGKLF GKRRN  
VVDVSPNKS VAGFIGGAIGSIAGAF LGLGPLAGSWKPEGSRYLVL SLILGAGMAFFVIAG  
DLFESALKRSAGMKDSGVIVPGRGGVLDSFDSL YFSAPFFVAFSYLARLFFL\*

>SPBIB\_v1\_100205|ID:27162356|dxr| 1-deoxy-D-xylulose 5-phosphate reductoisomerase [Uncultured spirochete bib]  
MPKRIILGAAGSIGRQSIEVIRQSAATEEPLVLAGFSVHHNAKVLLSLKNEFPHARAAY  
TGDAASAPTGADWAGPEALAQLLSAVQADIVVNGIAGAAGLSASILALQNRMH LALANKE



SIVMGYRLKQLADDNDLSIIPVDSEHAALFQLTQKIGMHAIAELTITASGGPFRTLPLE  
RLAEMTADDACKHPVWKMGRKISIDSATMANKGLELIEASKLFDMPQEHIRVLIHPQSYV  
HAMVRTFDGALYAQISEPDMRLPIHAALHWPHTYPSFGHAELAGKTLEFFEPERNRYPL  
VWLARNAMDAGDAACIAYNAANEIAVARFDAARIRFTQIAQVVSETLAHSWNLPVSSFED  
IFDIDMKARQISEELVEHIAW\*

>SPBIB\_v1\_100206|ID:27162357| Membrane-associated zinc metalloprotease [Uncultured spirochete bib]  
MVTIILGLIGLSLVVIVHEFGHFLIARTVGVDFEAFSVGWGPALLTHKGKKTEWRLGVLP  
IGGYCKLKGEDGFRAAIEQKLDIFPADKGSFYAAHPLKRIAIALAGPLFNMIFAVLVFTF  
VVAIGTTIRTAPNRIVLSSETGTTMQAGSSNPADMAGLQTGDILQSIDGRTIRDYSDLQE  
IIASNPGKALSQVQLRNGSIQNLVLTPLRDANTGAGVIGVYPWIDPLVSSVKEQSPAIA  
DLKPGDKILSANGKPIRNTIDLMNSFKAANGPVELTLERNQNLSTTHIAKSLEETGIAF  
VSITRTDKASSLPDAIAKAKETMSTFALTIRSIGLLFRGVNIFKAVSGPARITYLIGTA  
ASEQIKVEGLAGLVPVLSFLAFLSVGLAIMNLLPLPVLDDGGLLVFFIELARRRPLSAKT  
LYRYQFIGAAAFVLVLFVVATMSDIFFFAAR\*

>SPBIB\_v1\_100207|ID:27162358| protein of unknown function [Uncultured spirochete bib]  
LRLQREEVFMHFFHFCPNPACAYHQHAPKERWFVAAGFYVTKTFGKVQRFRCQACXX

>SPBIB\_v1\_110001|ID:27162359| protein of unknown function [Uncultured spirochete bib]  
MFRERAFVSRLSLDLLDQKLWKRAFSTPLKTSAEYLPRYALA\*

>SPBIB\_v1\_110002|ID:27162360|dnaB| Replicative DNA helicase [Uncultured spirochete bib]  
MAGPSLKDKLPLYNADAEQACLGALLIDPESMNTVLRYLRPESFYEPSNQETFEALISMH  
EKGQKPDILTSEELRSRGLDRIGGTAYIASLASFTPSAANVEYYARIVQEMATRRRLI  
QLSAEMAAMAHEETMDIDRVLDELQAKIFEISQNRRTIDYHSAKEIVTETMLLIEKLSTN  
PEAFTGVPTGITDLAMTSGLQNSEFVVIGARPSVGKTALALTIAAHASIDLKIPTAFFS  
LEMSESAIMLRLISSEARIPAERIRTGRIRTTDYDSLMEAAARIYEAPLYIVDMPNMKLL  
ELRTMARRLVLERGVKILFIDYTLVTHENADLPRWEQISAIRSLKALARELNIPVVAL  
SQLKREAEGKQPTLADLRESGSIEQDADLILFLHREREMNKAHDQQSDQVETDLIIAKQR  
NGPIGKTSVWFKSSYAKFVNMERHEHK\*

>SPBIB\_v1\_110003|ID:27162361|rpII| 50S ribosomal protein L9 [Uncultured spirochete bib]  
MKVILNQDIPNLGEIGDIKEVAAGYARNYLLPKKLVVMVYNEKSAAMLQKRQAEILAIKEQ  
KRLASRSLKEKLEADTLVISMPAGSNGKLYGAVTNHTIADLKKGIEVDRKKIEVPGRS  
IKSVGNKYKAVKLYEKDEAALRVSIEAQAVASAEKKAGEGEAKKHRPRRQRTETEPATA  
EEQAAAFEAAVNRGQLS\*

>SPBIB\_v1\_110004|ID:27162362| membrane protein of unknown function [Uncultured spirochete bib]  
METQNSMDPILVRANRRKIPVWVSAGVLSGLFYASGFIAVAFLVPVQFAFAKDGKKEGLL  
SMLASLAVIGIGNAMRLSSLGFMQFSVLVQTFLPPLLLCGIGALNMLAVDSWKKVIAVS  
VILAGVFGFLLKASIGTQEVQQAIAIILQLLGSSGTQLPDAATIARDYVAPAVEVILDC  
YGALLFLMLAASWSIGNRLGEKGTGADGTMQKGSIRSIVVPRWLLWPSILAWGLLLLVLVY  
GHKQGALAIVAWNASLAAASWYALQGIGLISYFFESKGMHRTTGLMLVLLILLILLDRKV  
GLAVAILMPVLGVSEVWLQYRIRKGA\*

>SPBIB\_v1\_110005|ID:27162363|rpsR| 30S ribosomal protein S18 [Uncultured spirochete bib]  
MDEMKDIEDVKVSRPEADQQDSRRDQDDRNGPRKKGKGFRRKVCRCFCTQKVVIDYKDADM  
LRRYTTERGKILPRRITGTCSKHQRELAVNIKRARALALLPYVVK\*

>SPBIB\_v1\_110006|ID:27162364|ssb| Single-stranded DNA-binding protein [Uncultured spirochete bib]  
VSDINVVVLVGRLTRDSELKYTPSGY AICRFSIAVNRSKKQDEGWVDEPHYFDIEFYGKS  
AEGLSKYLLKGRQVAVQGELRQDRWEKDGQQRSKVVVASTIRPLGSPQGTDA SNRRYA  
PDSVPAKPEPSNGQASIPPGVDEFTDDIPF\*

>SPBIB\_v1\_110007|ID:27162365|rpsF| 30S ribosomal protein S6 [Uncultured spirochete bib]  
MRQYELVTVLNSEEDQFKAGKQAVADLLAQFKAIDVKEEDMGDRPLAYPVKMMRAHYVL  
YRMSIEPASIVALERAIMLSPAILKHLVVKVED\*

>SPBIB\_v1\_110008|ID:27162366| transposase [Uncultured spirochete bib]  
MFVQTLFEKKTGRITLLFYITARRVKGKIVKTKVKRIGYLDEFDAYPDPLTHFRQEAKRL  
TQEAQLKTLTVTFMDEHFSFGAGFAATEDAAVEKADRTFHYGVLPPLLQLYRELKIDAF  
RIKAQYTKVDFNHNHLFQMLVFGRILFPESKLATWRDRTRILQHSDFSDDAVYRALPFFA  
QIKDALVQHLHEQVQRQYHRDTLLYYDVTNYYWEVDREDELKRKGVSKHRPEPIVQLG

LCMDNSGLPVTYGLFPGNTNDVATMRPMMQHLAESLGTKHLIYVADKGMGGMGNIAQIIL  
EHNGYVISSSVRKADAELRRYILDHEGYTELAGGSFKYKSRLVPCTLYVDTPDGRKKQIR  
INERQVVFWSERYWKKARHDRDMAIAKAMARAGYGENTVLNNHAGNRFIKKEIFDPDTRK  
EVDHPEFSFALDQELLDSEEELDGYLIRSNVVGREGDAPFNQPYRWHAKDNLFELNRP  
VVDLDIIDMYRGLWRIEESFKITKSQLKARPAFVHRQDSIEAHFLSCFVALLLLRLEKR  
TGEKIPVATIVESLRKAQLVQLEDETYVNACCDNVIEAIGQALELDLTKKYYTKGELKAL  
RGKTAKS\*

>SPBIB\_v1\_110009|ID:27162367|hisS| Histidine--tRNA ligase [Uncultured spirochete bib]  
MPTITPRVLKGFDFLPDAEMARASLVKKLEQVFAVSGFVPIIDTPVLEYAEILLGKGGGE  
TDKQVYRFLDHGERDVAMRFDLTVPFARFMAEHVDEL YLPFRRYHIAKVWRGENTQRGRY  
REFMQCDFDIVGTDSASADADIVLTAQAAMTKLQVGFSLRVNHRALFNRFLAHIDASDK  
SVDILRAVDKLEKIGQATANALSSLVGSPLASDILEFIRKEDSFEATLTKMHRFCAQKD  
QAADMAKDRMLKIMECVSAAGFENRMVLDPSITRGLDYTG MVLETTLAALPEIGSVCSG  
GRYDELASLYTDKPLPGV GASVGLDRLMAALEAIGKPVVSDESTQILINQDDIQLPEMH  
RLANLLRADGFAVEVFPEPKVVAQYTYAERKHIPLALFLGNASKPYTLRVLGRRENIEI  
ADFAIGDAARKELDGS\*

>SPBIB\_v1\_110010|ID:27162368|trmB| tRNA (guanine-N(7)-)-methyltransferase [Uncultured spirochete bib]  
MARDDAKPLEGDQLHNSSPLEGSQLLDGVSRSFVVRSGRLTEAQRRAIEVWGPTYIIPFT  
PVPLDFAKLFDEQRPVILEIGFGMGQATWQIARDRPNYNLGIIEHAPGVGRLIMDLREH  
NIANVRIIQHDALEVLRTAIPPELAGLHIFYPDPWPKKRHHKRRLMQKAVICLMAEKLA  
SGGYLYFVTDIEEYGEFAKNALESCKLLANRYEGFAPRQDWRPVTKFEGHANESGRNAFE  
LMFIKS\*

>SPBIB\_v1\_110011|ID:27162369| Helicase-associated domain protein [Uncultured spirochete bib]  
MMNPHDLPIYQQRKILDALEKNQVIVVESPTGSGKTTQLPIILYEAGYAARGIIGVTQP  
RRIATLSVSDFIARQLGSAIPGIIGYKMRFE DATASNTVIKIMTDGILLQEMKLDPFLSR  
YGVIMVDEAHERSLNIDFILGLLKKVLEARSEFRVIVSSATINAEIFSEYFSECPVIRID  
APMFPVRVYDAIKPVS DLPQPAGEHEAGYRSSDDALYDKILSIVGRVLDGDAGAEPGD  
ILIFLPGEKTIKGLQQLIASRWAAKLYCIPLYARLGKDEQERVFDPPPGKIKVVIATN  
IAETSVTIDGITVVIDSGLAKINYNPKTFTASLIETPISKASCNQRKGRAGRTRPGICY  
RLYSIKDFESRPLYPTEEIHRTDLSEVLLRMAELGITDFEHFDFITRPPKSAIRGAIEVL  
NLLDSLNPDRTLTRIGEMMCAFP LPKLSRMIVEAILKYPDVIAATLIAS AFLSTTSPYI  
LPPGEETEARA AHHQFRDPMGDFASYLRLYEA FVAARDKTRFCERNYLDERTLHEIVRIR  
EQLELIVSDLGVPISGGAIADYICAVSRGLIQFVCARQGRGMFRSLTAERI QIHGPSVM  
FRQDADFIVAGEIVRTTRMYAMSVSPLSKAQLYRISPELADQLIRLRQKTSMPPRSRED  
AYRSRNHKEQRGGRKSEISSHDLPOKEKLESLVLGGEVFP IEGKKPSLRTVVL DWNRLK  
RIASQIGPADEDLGKGLKAKIEWGKYQLFGNEKFSTVLKALKWMDIEKDLSSGWP KHKNY  
SFEADKSESEEDSLEKRRRTLEELADSLGSVLHVTKV GKTGKLGFIGLYSDEAGNFWFQP  
TRSFSEALNQLASAE LLVDYAKDLGLEAELKDKIGLLYRRLN DFFSSL\*

>SPBIB\_v1\_110012|ID:27162370|xseA| Exodeoxyribonuclease 7 large subunit [Uncultured spirochete bib]  
MHADDWLADSVQSSSPLSVS QLTLLIKNDLENKYPDVTVEGEISNCKVAASGHLYFSLKD  
DQAVLQAVMFRDMLALS FVPRDGMKVWARGGISVYAGRGQYQLIARTMRAAGLGDILAM  
LEERKQKFAKEGLFDQDRKKQIPAFPERIAV VTSATGA AIRDIIHVLRRRNPKAHILLP  
AAVQGEAAASIAARIRQANQWSIADV LIVGRGGGSIEDLLPFSEEIVVRAIAESRIPVI  
SAVGHETDWALSDYAADLRAPTPSAAAEMASKDLGLVQKEIEHFETVLAQSMRQIIEHAR  
QRLSLVSPRSMESMLVRRHMLLMQRFD TATEAIEQGMRSKVD AFSHRIALAA SAIELSNP  
KAIMKRGFSIVRKS AEIIRSAEMIKPGEEVHISFYRGEANASILSAQAEDARSKNDEGL\*

>SPBIB\_v1\_110013|ID:27162371|xseB| Exodeoxyribonuclease 7 small subunit [Uncultured spirochete bib]  
MKDFEKKIARLEQLAEQMRD TDLPLEKSFEIFE EGITLARSLKKEDELQ GKVEVLLNSL  
EEDESPRTAAFEDQAQNIQP\*

>SPBIB\_v1\_110014|ID:27162372| CTP pyrophosphohydrolase (fragment) [Uncultured spirochete bib]  
MSYRWEFPGGKVEETETDEEALERE FLEEFGARIQVVRYLGETMF AHRGRMRILAAWEIR  
MQPKDVAMLNEHSEAAWLPFESITKMDLADSDRSLLPLVQA AFSALQQKM\*

>SPBIB\_v1\_110015|ID:27162373| protein of unknown function [Uncultured spirochete bib]  
MRSLVSMQSLLLDASTRELFNFSADGLMEV ASLRLWYALQ QEMLSLGALTGKSKDTIAI

AALCGKGDNAGDALAMLRHAKMDGFQRLSVFIPDPATMKENARLNLCRAERC GIDIIRYD  
LAPDELEKKLTAQDILLDAVLGTGVKGAAKEPAAALISALASAKKAAVSEKSHFPYLSI  
DVPSGLSDEWEPGFPCVQADATLCIEPMKEALFMHAARPYAGKIIPVGGIFPLWPNEAHP  
RVWEIESADLPEFLPPISPWAHKMQRGRVAIFAGSAAGAGAAMHCVRGAAASGAGYIALY  
CDEELYSAYLSALGDYAIVRVYSDDTFSAEWDALVIGPGWGIGEKREGQLARLLQSKTP  
IILDADGVRLFAHLAEQHSRNGTLRFFKAPLVLTTPHPGEFSALQKFISQEEAAQFQSSGM  
VNQVCSLAQKFGIVVALRASTTHIAFPDESCAICDGSTPGLGVAGSGDVLSGLAGGLAR  
WRAARELRAASELNEGDHGMWKDPLSAAIISAVLVHAAAGRSLFDAQGWFNPEELARTCA  
RISSWQLDCLKAQ\*

>SPBIB\_v1\_110016|ID:27162374| exported protein of unknown function [Uncultured spirochete bib]  
MNRRCRTRLLLLGVLLVLASCKVSSDEAKTHALFDIGYGKTDFTLDSASEKNNIGLSIN  
KGIFHILSRGEAKILSISSYGQTLAMWYDPARGSAPMILKDVKIDAGSSKEDMGRFATQV  
SFVDPWPMAADSRQTLVADRKSQVVSANGTENSAYGAEPDRIVRRFDANGKELGPLGQE  
GIAGSPFPEIMRLEITENDTLAVICASETETLVYFYDRNGVFLHLLKLDNTLPIPAQIL  
KKNPEGKGLRIIPSLESIIIPAYVAGKTEVILKINYYLENYDVGTVLTSIDQLGGWILQI  
DASAGSILNAFPLQSGMSETGVNLQLVAACKDSFLTRWADQYLG GELLKFDSSGKVTGK  
LSIRCPDEAAAFVAMTVGDDGYLYLLASLPSALRMYAWKIPGM\*

>SPBIB\_v1\_110017|ID:27162375|secA| Protein translocase subunit SecA [Uncultured spirochete bib]  
MSGNILAALLGSKKEKDIKAVLPLLHRINELEPWALSLSADDFPKMTTKFKDRLSKGETL  
DDILPEAFALVREAARRRLGERPFDVQLIGGIVLHQGKIVEMKTGEGKTLSSVTAAYLNA  
LTGQGVHVITVNDYLAERDSQWMGQIYTFGLSVGCILSSMDNVARKTSYACDITYGTNN  
EFGFDYLRDNMVWSLDQKVQRGHAYCIIDEIDSILIDEARTPLIISGPADDDTYKVNEVN  
RLALSLVEAKKNPETGEYPDESKGEVLEGGDFKIDEKSKRVMFTSEG MNHIESLLQKRGLI  
KGS LFD PANFEFVHYFTQAVRAQRLFNKDVDYVVDNQQVQVDEFTGRILHGRRYSEGLH  
EAIEAKERIKIARRNRTLATITFQNYFRLYK KLAGMTGTADTESEEFNKIYNLDV VVIPT  
NRPVVRDENDLVYLNTEKFDAILNEIKTLHTKGQPILVGTVSIEKSEKLSAMLTNGI  
RHEVLNAKNHAREALIISEAGAKGAVTIATNMAGRGTDIKLGGNPEFRARRKAGTEAPEE  
KYREALLHEYDLWARDYEEVKSLGGLCVIGTERHESRRIDNQLRGRSGRQGD PGRSIFFI  
SLDDDLMRLFGGENFKQLMSKAGMKPGEPIYHPLL NKSIESAQKKVEERNFEIRKHLLEY  
DDVLNKQRNFIYEQRNAILADTDLIERVRTSATEMLED RSDLLDQSIKENQNKAIADFCS  
WLFDTFGIDLSPKQVADLHRSGTIIQEIQLLDQDLSAKIESAGAESLNFFIRFSYLQEI  
DEKWLDHLESMEALREAVYLRSYAQKNPLLEYKLEGS DIFESLILSIRHNIASKVFRVRI  
QQKVEQTATIPSRAPRIEVAQTSHQSVGSFAGESEA VRQESAIAAAAAPPAATVIRQQGK  
IGRNDPCPCGSGKKYKHCHGR\*

>SPBIB\_v1\_110018|ID:27162376| putative Fibronectin-binding A domain protein [Uncultured spirochete bib]  
MSLNCEEIELILSEPLEGMKIQNIFQPSYDAIVLELYGRGNRLFYLISIAHNACRIHPL  
TAPPAKNERPLRFMECLRSRIKGGTIIHAEQISKDRIIKIEITKADEKGS PAKLFLYARL  
WSGAGNVLLVSEEGIIIDALRRLPSRQEISGA AFALPAPRDAASQSAKPYTIRDLQGP  
FWQRIEHFYSEHTGQLSRDALIAQVREIFSRKYSSLENRLSALS AKQNEYQQAERFRQIG  
DILIGGYAIEMQGTKTFARALDFYENREILIEIEPSATPAQNAARYYEKYHKAKTGIDDI  
AAELERCRTSMSQLKTWLSKLEAEPDPIVIAQALRKGGAARTKEKMRFP CQHIEYKGWTI  
LIGKSGKENDEILRHIARGSDLWLHARDYSGSYVFIRA IKNKSPPEVIQTAARLAIYYS  
KARKNLGGDVHTTYVKNLRRAKDGPVGLVIPYLEKNIYISFTEA QIKDILDESLSGEEIE  
Q\*

>SPBIB\_v1\_110019|ID:27162377| conserved exported protein of unknown function [Uncultured spirochete bib]  
MKRAGSVFCVLLVLAFACTAPAIAQQKSKVVVSVLKGPSGLSSAWMMSELLKTSPDEF GF  
ITVASADMVVAKLLNGEIDAGVLPVNIAAKL FNAGAPIRALAVVGNGMVKFLT TDPDLAS  
LADVKGKTIYIAGQKATPDFLFQYLCAAYGLNAGSDYTPVYNL AYPEIAAGLAAGKIRYA  
VLPEPFASQAILKNASIRAAVDLKEWQLRTNQEDY PMSL FVARKELVESNPEKARILLD  
SYRASLRKAKEDPSGTGKLAESLDLGVSAQVAASA IPLSNFVFIEAPAARHSIETLLSVF  
LQFEPASVGGKLPDSAFYAIIR\*

>SPBIB\_v1\_110020|ID:27162378| Binding-protein-dependent transport systems inner membrane component  
[Uncultured spirochete bib]  
VENCLIVLSMQSSARPSWTPLAWRLLGIACFLVAWQAASSIVKSELILPGPPIVLKALAN

LSTTAKFWSAVSGSLARVLESFIISIAIGLLSGFISGISQPAKAFLSPFITGVRATPVLAL  
LILLAMFWFPSSQVPVFSVFLMAFPVMHTSAEAGIRSV DQNLLQMSRLFHVPKRVMLWRL  
RVPSALPYILSGAKNALGLCWKVVVAGEVLSQPRMALGSAMQESRLMLETADVFAWALVT  
ILLCGLSEYLFGLLSARANLVYLSVAPQVSRQSSI\*

>SPBIB\_v1\_110021|ID:27162379| ABC transporter related protein [Uncultured spirochete bib]  
MSMAIQNLKRFGDLLVLDSVSFEMQASSITAILGPSGCGKTTLLNILSGILAADAGAMA  
GLEDKRFSYCFQEPRLAWLIAEDNMRYAMASLQDTNTIEQRISRFLEEAGLTEFRHFRP  
HQLSGGMQKRLSLARAFAPSDILLDEAFSAVDLKQKIELMQAFLKLWKDERPTAVIVT  
HDIHDALFLADQVVVLSQRPARVRGILQINTPHEARLFGSNELAAEYEQQLYSLGFASTLD  
QDANMPAN\*

>SPBIB\_v1\_110022|ID:27162380| putative Multi-sensor hybrid histidine kinase [Uncultured spirochete bib]  
MPKIAVLEADAVIALDIKSIEQANLASVDVFESFGALEPELTEQHFNLLVIDIDDNREE  
DIQTATRVRDFGIHCIVISDHASASLVKLEAEPLGMLVKPFSSRELIANVETGLYRV  
SMEQKLRDSERRYRNLFAYSLSARCISAFDGAILERNNAFETQFGLPQKIRNIQELFTEE  
SIWNRVLDLSLEKQVQLQEELRTRDSGEGARDVLSFSYFQDEQNETRVLCEFIDITESKR  
LRDELFSQKLEAIGRLAGGVAHDLNNTSMIGSLEMIKLDAGTSKEISEDIAGMEHVI  
QKTSALTRQLLGFSSRRKSFSPA VLDLREVLSDSHKMLKRLIPEKIYISLSPDPCPVIA  
DAGHIEQILLNLVFNARDALETADNPHISILLSHTAVKREKAGKSLVPEGNYALIEVKDN  
GIGIEPAVMEKIFEPFFTTKGEKGTGLGLSIVSSLVDLNGGYIGAESTPSAGTTFRIWL  
PLAKGSQTSEVSEASSVLP TENIYNHYASELKGKRILVDDDESVLATCKRTLERAGCLT  
ETCVNAGEALLLEHHTFDLLVDIVLPGVYGTTELWQRLKKGNSVVSCLYMTGYEPHSLG  
VETEPIPKPFAPAALIEACA KAIKRGRA\*

>SPBIB\_v1\_110023|ID:27162381| exported protein of unknown function [Uncultured spirochete bib]  
MKREKRFIISLIPVLVLAFLFQSLTADEASIAPEPSEAMAGNIEQLAANDPEASIAML  
SDLFEKQREKGEPLENSIIGGKAVELFGKSASTMLGLFRKALQEGDIVTAKRLSFAHTI  
SRYASLYESLKNVLPADFSAMGEPAVRLQLIFLEAEAKFKKNGYVAGKAVLAAALSAEPS  
LLSIRDVPSAISKEIDSAQEPALFFLSWAERAKANNDIEAAA WFGAMAGQIKFEAVSPQG  
EKEDWIASAVSGVTVYVDRGFKIQGGYSVPDRVLGTGFQIAPGLYLTNHHVVQSEVDPS  
YKGYRSLRSPDNPQARVPAKVIGWDEEMDLALLQSEEKLSVIYIPSSMKFQAGDRVF  
AVGSPIGLENSVTAGVVSSLSRKIISYGEAAQIDVPVNQGNSSGSPFLANGLLVGMVFAG  
LPSFQNFALPVQWIVSSLPALFSGTSSVHPRLGIVLGGKSGQNPVVLSDLDKVSRAFR  
AGDVLKEINGVPAKDIASIQQLAAVPPDALCMVEAQRDFQPVRRLRRIQNTGGASLIPA  
WDTIKRITYILEGILGARLEQLEDSSKVGGLYSVSWVCPAEAADETGIAENDTINIHKIQL  
DRKNKVFIFESAKSRLSGYFERTIRLELPAESAII\*

>SPBIB\_v1\_110024|ID:27162382|ftsH| protease, ATP-dependent zinc-metallo [Uncultured spirochete bib]  
MSDQNDNSNDKRPELPPAVKGNRAALAVFFSLIVLFGVYLFFGQKENSREIPYSSFLSYL  
DLGEVKSVRIIDQRDIDGYLIGKNGAEMSFTTKIPYFDSELMARLQNKGVSVTGAVSGTS  
PFQILFELTPWIFGFILWIMMRQMGGNKAFFSGKSKAKLYNDSEKRVTFDDVAGQKEA  
KYELMEVIDYLNPKKFKVKGAKIPKGVLLVGMPTGKTLLIAKATAGEANVPFFHMSGSD  
FVEMFVGVGASRVRDLFEQGRKHAPCIIFIDELDAVGRTRGSGLGGGHDEREQTLNQMLV  
EMDGFDTKDG VIVLAATNRPDVLDPALLRPRGRFDRQVVVAMPDVQERKDILKIHMSKIPV  
AENV DVERLARATPGTSGADLANMVNEAALFAIRKSKDIVEMEDFEDARDKILMGVARKS  
LVIADDEKRSTAIHESGHALLHYFLPNSDPLHKVTIVPRGRALGLALSLEPKDTYSRTYG  
WLYDRIVISYGGYAAEKIVYGETTTGAAQDIKQATEIARKMVREWGMSDAIGPVSLGDEE  
EPIFLGREIAQHKDYSEETARKIDAAIQSLSSALEKAMSILTREKDRLLALADRLMQIE  
TLEDSDVRTLLGLQDGKFVEEGAVKC\*

>SPBIB\_v1\_110025|ID:27162383| putative tRNA(Ile)-lysine synthase [Uncultured spirochete bib]  
MRGEAVDRLELRMRILLALGIKPETPLALAFSGGLDSVLLNLLVRCGLRNIRAVHVCH  
NIRPADELAREKVLIKETCMKMHVNL TIVNVKEGAIDQYASKARCGIEAARHFRYRALV  
RSAQRFGIRTVATAHHADDQVETFLGMVRGGSRLALSGIEPVRMLSASQGIYIIRPLLS  
FERVELFQYAMRKGIVWSEDSTNADTAFMRNKIRHVLIPLLNAEFPSWKTSVLSYVEQIR  
EEHEFVERSQAQKILHLLAQVEGEELLDIELLKKERRLMRLAVIKLYLARLGGGIAASRE  
AVEELDQAISSNKKRIEAGGFEDLAEGFLKFCGKTRGSSAQAVRAISPLDSYEKDDQYF  
LMVPAAGTYRCGPYIIQISEYEHGSTLHDTTPPATANSLVCAFFPFILRNRRAGD TVLGPA

GQKAVDTYLKEIKIAARLRHAVPVIEDKDGIAAVIPSAFGNAASARPLLRLDPALCQNKKM  
KYILLSMKGDSTINVRSKR\*

>SPBIB\_v1\_110026|ID:27162384|rpLY| 50S ribosomal protein L25 [Uncultured spirochete bib]  
MEHIELKVSPPRGKLTGELNKRKEGKVPAQLYGKEISPVIFIDREEFGSAARRITESM  
IIDLNLEGKKYPSLMKEIQKANISGDLHIDFNLIERGHKIHVKVPLHLTGSAGVREGG  
ILEHAIHDIEVECDPMLPEKIEVDITDLEANHALHLRDIAIPEGVKVLTNPETVIAIK  
FARAEVEKVEAPEAAEAEAAAAAAQPAAEAGAAETAEK\*

>SPBIB\_v1\_110027|ID:27162385|spoVG| putative septation protein SpoVG [Uncultured spirochete bib]  
MEVTDIRIRKVSSEGKLYAVTVTFDECFVHVNVKIIIEGKSGMFIAMPSSRRTKTGEYKDI  
AHPICPDFRSKLQEKILAAYNDSKANDTTVPEFD\*

>SPBIB\_v1\_110028|ID:27162386|ispE| 4-diphosphocytidyl-2-C-methyl-D-erythritol kinase [Uncultured spirochete bib]  
MILLTKNPFAYTVWLMEETNITAFKINIGLKIFDRRKSGYHDIESLFQNVDIADSLRIR  
PNNVGKIVIEGDIGCAPEQSTIYHAAKHFCMEFEDKSPITGVTIKVEKGIPSGAGLGGAG  
ADAAATLFGMNELFEKRLSRAELARIGSHVASDVAFFLYGGAAIVRGRGEYVFPIEPRTD  
FGLVILQPTWASSTPAAYAALDNYRAIRGIEHACTSEDAAGYSINLPNEQLEKIYRSPIQ  
KWGFENDFLPVLAEKKKQYSEMLSLLEAGAAAYVNLTGSGSCVFGVFDNAEAAQKASCTC  
SSLLFGEGDRAQSFAAHIIAAKPLARSMIVSYIQDCNEDTRSDKERPCYGSY\*

>SPBIB\_v1\_110029|ID:27162387| protein of unknown function [Uncultured spirochete bib]  
MNHKTTMTADPQEDFEIITLTHGNSANTIYSLRQTVRFDGAYDDEFDYDSDDDFEDEDL  
EDDEDDEDDEDLDDDFEDDDEDLDEDEDLDEDDFEDDDFDYEDDTDE\*

>SPBIB\_v1\_110030|ID:27162388| putative Ribosomal silencing factor RsfS [Uncultured spirochete bib]  
LDSKAFAYQSAEILARHNALDVLVMDIHDTAGWADYFVIATSTSAAHMRGLERHLEEFFA  
NAEISLLNKPEVTDDQSWLLLDGGNVIIHIMTNEARAFYDLESLWFNAPRFSVTFNGKKE  
S\*

>SPBIB\_v1\_110031|ID:27162389| conserved protein of unknown function [Uncultured spirochete bib]  
MNELQPGIFKRSVLPDLLLVLAAISAFIVVRLTQKGTVEAVIKKDKAMGILFIFEQEKK  
PVSNQLLIWYPSRRKAAIMDIPGSMGIILKSANRMSSIDSVYDSRNPARYVKEISDYLR  
PIDGWLTYDERGLSKTVDLLEGIQIFLPEPAMGNNALPDVSLPGGSVLLDGEKASQYLY  
ACSADSYTEEISRKQRLVLSLSQLSQKSGVISSSKGLRLIASKPKSNFSLETREEIFRH  
FVQIDVEMTITQFISGSFRTFEGRKLLFPYDYGELARDIVSQTAKALGTENSTNLQKSAV  
TIEILNGTGSKGVAGAASVLFESYGYKVVSVGNASSFDYAKTVMYDNEGDKSALQQVADV  
IGCKSFGNPDDLPGPRKANVTIILGKDFNGRYCVGQ\*

>SPBIB\_v1\_110032|ID:27162390| conserved protein of unknown function [Uncultured spirochete bib]  
MDYIGISEILSQVEKTVEIELSAKRLAHCSTAETSFLCERFGLDVEKGRLAGIAHDMC  
RELVYEEQERIIAQFGSCLDRFHASPSLQALLSDPVYRKKMIHGPAACMLCHEFGVDDA  
DILEAIALHSIADNGASDLAKVVYIADKLEPLRQRPSDAEEMLHTLNLDALFVYTLANVV  
RWFQESGKSLSPYTAELYNRMLQP\*

>SPBIB\_v1\_110033|ID:27162391|nadD| putative nicotinate-nucleotide adenylyltransferase [Uncultured spirochete bib]  
MRIALLGGSFNPPHIGHIILAEIILGTLDYDRVLFIPANIPPHKEPQGDPGTDMRLAMLH  
ATLEGWSEFAIEPCELKRPGISYTIDTLREISRKYSFDGKPLVIGDDLAPDFLKVWKDP  
ELILEYADIIVAHREHAEELSLPYAHRYIKNLLIPVSSTLVRERIANHGAWRSLVSPGVQ  
EIIETYGLYRNI\*

>SPBIB\_v1\_110034|ID:27162392|obgE| GTPase involved in cell partitioning and DNA repair [Uncultured spirochete  
bib]  
VIKFADEAIITVASGKGGDGCVAFRREKFIPFGGPAGGDGGRGGDVIFVVKRNLRTLAYL  
RYRQNFRAQNGQPGMGKNMHRDGEDAIEVPPGTIIRDAETGEILKDFSARTWKALQE  
GERWVFLKGGKGGWGNTHYKNSVNQAPHFAQPGQPGQERKLIKIELSLIADIGLVGFPNAG  
KSSLLDYFTNARPKIAPYPFTTKIPNLGVLTVNDRDIILADIPGIIIEGAHEGAGLGIRFL  
KHIARTACLAFLIDLSDDNWRSAPPTLLHELEMFSPELAKKPRILLGTKLDLPEAQEHK  
DFYAAFPEEQAYCISVFSGAGLDQLKQVFFFEKVEAHEASELHSAETESLFETIDFDDEE  
LPE\*

>SPBIB\_v1\_110035|ID:27162393|rpmA| 50S ribosomal protein L27 [Uncultured spirochete bib]  
MPHKGVNGRDSNPQHLGVKAYGNQHITAGTIIVRQRGSRINPGKNVGMGKDDTLFALADG  
MVSFREHKGKKFVDVEPVTNA\*

>SPBIB\_v1\_110036|ID:27162394|rpIU| 50S ribosomal subunit protein L21 [Uncultured spirochete bib]  
MYAVVEINGKQYRAENGKNLLVDRLDAAPGESVVFKEKVLLAGENTAFGTPYVKGASVKA  
TVNEEVKGDKVVVFKYMPKKHYRRTHGHRQQYTVLTVNEIVGA\*

>SPBIB\_v1\_110037|ID:27162395|argS| Arginine--tRNA ligase [Uncultured spirochete bib]  
MEHYIDQWKTIIAAHLRTIADKKGIVDFSLTLNDIIAEKPPKPELGDIGFPMFAFAKQFR  
LSPAQIASEVAQSEQLLDENEKRDWPGNLKAVGPYLVNLYLERTRAVTFLLSNAANPDWG  
SSAVFSGRKMIEFSCPNTNKPLHLGHLRNNVLGESLSRIMKAAGAENVKKNLINDRGVH  
ICKSMLAYLAYGEGRTPEDGLKSDHFVVGKYYVLFNKLKEEDPQAEQKAQELLQKWEAGD  
PEVIALWKKMNDWAVDGMETYRRQQVSFDEYHFEHETYKLGKKEVLEGLERGVFYRGED  
GAIWIDLEDLGLGKKVLLRKDGTSIYITQDIGTAIMRHESWPFQQLIYVVASEQQYHFV  
LFEVLKRLGYDWASSLYHLSYGLVNLPTGRMKTREGTVVDADDLIDELARLAAVEIAEK  
RADAVGDIQSVAGQIALGALHYLLQISPAKDMLYNPEQSLSFTGDTGPYIQYMGARASS  
ILRKHDQGGEGNAAQGIPKANLLSSDADWPLVRTLMELPSIIEESAKGKDPSILAGYAHAV  
ASEFSAWYRDNVPLINEDPNLSASRLALVRAVKSVMRASSELLCVPFLEAM\*

>SPBIB\_v1\_110038|ID:27162396| conserved protein of unknown function [Uncultured spirochete bib]  
MTRMPGAISREKFAQIAPAVHQEKEGFVSVTVIPRAPKNEIAGFRNGSLLVKVTVAPEK  
GKANEAVLAAIAEFLDIAPSNLRILRGHTCRNKMVLLQNIG\*

>SPBIB\_v1\_110039|ID:27162397|ligA| DNA ligase [Uncultured spirochete bib]  
MPDTSRLESEKNARVNELEAEIKRHQKLYNNGEPEISDEEFDALWDELESLDPGNPLLK  
AVGTDRSERWPKSPHRMTMGSLSKATDPESFLAWAAKVQYPLYLVQYKLDGASMEQYDE  
GHFVRGVTRGDGVIGDDITPNVAKMNGVPKELPEPFTGAVRGEVLMSSRMHDAKYADKAN  
CRNAANGLMKRKDGVGAEDLDIICYDAVSSLATGTPFDTERKKAWLERMGFKVPTVEC  
ESPEAVIAYRAKIMDIRPDLEYDIDGLVVKGDRIDREDASKLRPELQIAFKFSPEEAVTT  
LREVEWSESGATVTPIGIVEPVRLAGTTVQRANLANPDMIRSMDLRIGSKVVITKRGEII  
PKIESLVENPPDAVQIEIPTHCSLCSAELIDEGTSLYCPNPACPGKAYHRLEKWLSVIDI  
KDLGSALLKRLFDSGKVTRIPDLYRLSVQDLLAFERMGEKSAQKIIRNVHARNEVSLSDF  
IAGFDIEGIGVLMADKLIAGIDTLDKLFAASPSDFEKIDGFAEITARSLYDGLRVVEKD  
MRELAEQGYVRILPAARSSGEEAAGVAGKSFCFTGELESIKRSEAEKLVRAAGGTVKSSV  
TKDLDYLVNTDPTSGSEKNRKAQEFVIPDETQFLALLGRK\*

>SPBIB\_v1\_110040|ID:27162398| conserved protein of unknown function [Uncultured spirochete bib]  
MRYFAIQVATRHEDDWLDRIQDQIEHVKFHKIMKKMYIRKRGKTKLEEVPVLPFYIFFEH  
PEEELPLEVLSKIRHSRFFIRFLPSNEAPRPLDRHDSDIIRHFVNFGLIPPSLVKFD  
QKIKVVQGPLQGIEGFIVKVDRRKHRAKVRLTIAESVMILDLSFEVMESDSTEAEAKGSR  
HAEKRVHSV\*

>SPBIB\_v1\_110041|ID:27162399| protein of unknown function [Uncultured spirochete bib]  
MQKNEYIPFDQLEVPGMLYACMIRATAQIGHILAIRPPALPSGYSILTADQLPLRNLKI  
SSVSIPVFASDTVSYAGETVGLIIGPDPLLVEEFASSTAVECDGDSVHRDWRMFSSRIA  
ARLNLQRGNMPEVSQNDSPVFNYSVSIPEGFEFSFNSGIGALAEWDYDKLKLACPTLWPE  
HVRSSLASILEASPSDIELLPVLMNDSSEFYFWYPSLLAARAFAAWTLKRPVKLIVSIK  
RERQYLPRVQGISLWFKSIWSSKTSRLLGIECRFSIPTGTYSVFANKILRKTAAHLA  
PGLPVSITGFAIRTNVPMGAIESPASAAIYAMLQAHIAQAARALDRDVFELSQSTLSRM  
DTSKKAGALGIAEIPFAKIAKPLLEKTDFMRKYAAYELVHKRNPGGKEALLRAISFLAY  
QGASDFLPESARKSEVRLSLDRNLKAHVESDAAFASERLKAALTTLIADNLKIPPAHIF  
AMQKSPHPDSVPLMSSSGIAMLGDIVRRASARVQRLRFREGLPISAHAFSSVRAQENSTN  
VLSKIERPSLGAAIEVEYDTRSGIFQFIRIHISVNAGKILSPLNAKSAIRAASINAMRS  
CLVSTSPNAAERNDMYDHILSRSTIAIELLDDEKSTIPRPVGDIVHSLVLSCFLGIMQQL  
NETNRFILPFRPVSAIAEGAQQ\*

>SPBIB\_v1\_110042|ID:27162400| putative FAD binding domain in molybdopterin dehydrogenase [Uncultured spirochete bib]  
MNLSEIHFPQTIPPELLTISREKNIQLIGGATTFGYLQPTRYLSFPNTIAITSRIPELHA  
IHKTERMISYGAACLTSELEHVYPFEHPQSASLLRTVATSAVRNVATIGGHLMYDCSFLS  
LWPLFACLDAELEFRAASQSHIKNIWYLVDENGRHCAAGNELLARIRIPLLSIDHIYIKR  
IGGNIFPGGDGAHLVSLTSVDRRSINFFRLVLAGARAFRDFEAEQRIISASHPLSPKIAQ  
TVLHMYAESLRKTNFWNADLILPLIGQVLEDLQR\*

>SPBIB\_v1\_110043|ID:27162401| putative Tetrapyrrole methylase family protein [Uncultured spirochete bib]  
MENKKKESGSLYLIPTPIVPYPALWKPALLRAMISPAILDRLFRMTHFIVESEKSALRL  
LSRILPADRLNELVFMLLDEHSTSNLDNAPLAALKNGNDCALLSEAGMPCADPGSALVA  
AAHAENLRVVPMMGGESSMLALAGSGLNGQKFCFLGYLPVREQDLRKMLVAEGTKASSDG  
AARVFIETPYRNAKTFKACIESLPERLHFSFACAFGTQNSLIKSMQVARWRNFLFEPPSQ  
PAVFCFGLPAVLPQPQQHRGCRA\*

>SPBIB\_v1\_110044|ID:27162402|mfd| Transcription-repair-coupling factor [Uncultured spirochete bib]  
MKVHTLQALFDRISRNAALKEIRVHLELGRLPLHLQNSENSALAMSLALLSRQTKRRFIV  
VLPSDQETEEFAQDLALTDKVLNFPSPWPGAPYRAIPVRSRIFERTSALAKLAENDFEI  
MVVSARTLAIIVPPKSYMLAHTLKLEERQLFDPTKISERLAEFGYLRVPSVSLPGEYALR  
GEVLDFSMPEGETAIRVHFDRIEKITRFDPATQSGHERIQIILRPLKEVIWDTSTIA  
RLKEKAVELARTDARMEQIIEALASGQEIQGEFVFPFAFDSMHSIVDYADDHTVVFVVA  
RERIDALAENIRKEYASMYRLALREMLVPPPDLIQLNDSLSSISRALFCYALKGVDES  
SSRIALGAEPFRSYFGNIRLFREELAGFEKDG YQTWIFASSEPAERIASLIQDDSIIV  
HGPISSGFIFPELRLRAVSEHELFGRRKHVPRSLGKTKSAAIESFIELSPGDYVVHVNYG  
IGRFSGIERLTVLGLERDYIRIDYAGEEKVFPVIEQANLVQRYIGNEGEAPHLDSLGSRA  
WENRKRVRKSVEELAERLIRYARRKAAKGFAPPD TDWQM QFEATFPFEETEDQIRCI  
EEVKRDMESPKPMDRLVCGDVGFGKTEIAMRACFKAITAGKQVAFLAPTTILAEQHYENF  
LERVGEFPVRVELLSRLIDKKNQMKILKGLADGSIDM VIGTHRILQKDVRFKDLGLLVID  
EEQRFGVKDKERL KEMKAGVDCLTLTATPIPTLHMSLLKIRDMSVLQTPMERQSIQTF  
VEEFPELVARAIRNEIARGGQIFYLHNRIETLPEVEQFIRQLVPEALVESAHGQIDPRD  
LESIMHRFIHGAFHVLVSTTIENGIDIPNVNTIIDRADNYGVSQLYQLKGRVGRSDRQ  
AYAYLLYPDKRALSELAMKRLQIISDFTEL GSGFKIALKDLEVRGAGNLLGREQSGDIYA  
VGFDLYLKLLEAVSRLSGVEGEEEEPYLEYSGFIPDSYISVPMIKMEIYKRIASVSN  
QDEIDSLHMDLEERFGPIPEEALSLLALAEMRVLCKLAISSLRERENGLVTVEFSKVSKI  
SVEKILRLIRESSGAIRLSPDKPNAIQIQTKAIGLKEKSAYLKERLSFLAG\*

>SPBIB\_v1\_110045|ID:27162403| protein of unknown function [Uncultured spirochete bib]  
MFALILIEDTSVADLVLRLDQESGISAISYRDPKVIDHIAEIKPDVLIIRQKDFPLHIP  
LIAAMVRFSESLQRCRIVVIGDEVPSFMQCWQITEEKLQKDASSLARLVFSGAVSPGHRG  
SRLVAKAQRMVKE\*

>SPBIB\_v1\_110046|ID:27162404| Regulatory protein ArsR [Uncultured spirochete bib]  
MDTTPKPCNEEQ LTPYAQKFKAIGHVPRLKILCLIVHQEVPCVGDIVRCLDQPQPVSQH  
LAILKRYGIVSSEVKKTRRIYSISDPFIKNLIDSMICEIGTSAPEPKK\*

>SPBIB\_v1\_110047|ID:27162405|ispG| 4-hydroxy-3-methylbut-2-en-1-yl diphosphate synthase [Uncultured spirochete bib]  
MAANISGGVPAERKAVKVGDVLMGQGWVPSIQTMWKDPLPAFSSPDDERLQPILKRLVAL  
KAIGCQIRFAVPDIAAAEALGMLAGFSPMPVADIHFDWRIALRCMDFPIAKVRINPGN  
IGAEWKVREVAAKALDKGPIRIGINGGSLPKDLDGEPDLALAALCAAAREIEVLESMHF  
SDIVVSLKLNPEPETVIRANELFAAQYPYPLHLGVTEAGPLVAGVVRNTAALVPLLKKDIG  
ATIRVSLSDTMEQEVLAGKEILACAGKMGARIVSCPRCGRATFDTHAFTARWMERLYS  
IGVDISVAVMGCVVNGPGEARHADIGITGSGNSVLIFKHGEIVRRIAKEEADKAFGEELD  
ALVREKSM\*

>SPBIB\_v1\_110048|ID:27162406| conserved membrane protein of unknown function [Uncultured spirochete bib]  
MNIALIGAACVLGLAATGSGIGAGIAGMAAIGSWKRSYLNNKTPSFLVAFAGAPLTQTI  
YGFILMGRMLNSSKDPLLLL AAGVMSGLAIGMSAVAQQQAAAAGCDAFGETGKGFANYIT  
VVGLCETVALFVLAFTFSAV\*

>SPBIB\_v1\_110049|ID:27162407| putative V-type ATP synthase subunit I 1 [Uncultured spirochete bib]  
MIVPMKKFYLIVLDKDRSVPERLRKLGVAHVEELPGSGETYQALERKSEAETVYYLLS  
NYEDKKS KSKHPAREGKGLSQIEAAKLLVQEVSA LKHEFDLNERASQLAREMDRIATWG  
EVSVSQLAEVSEKTGLSIHFFEAPSKEAAHIPEELEYVRLAAPK GKIRLGVLIEEGK KLP  
ELPAIFQEFLPPEMPLSSMRQEAASIDRRKKEIEAELRARTVHASVLKSYLDELESNITL  
ERLRSGMPSQAQFAYLQGFVPARDCDRFKKMVAR YGWAAAFDDPSDEELPPTLVENPPAI  
RIIDPVFEFLGTVPNYREYDISLWFLMFFSLFFAMIFGDGGY GSLIVLASLVSIVLGK RK  
GQKASDAQKLFLLLGAVTVVWGALTASWFGIQYNHLPYILQNISLPLINGQNPNSSESNIK

VFCFIIGLVQLSIAHIKNIKRDFFPNLKFMSQIGSLLLLAGMFNAALNLVIDAQRFPISRW  
ALICIASGFSLVFVFGNWNKGIVPSLVECLKGLIPTFLGTVSFADIVSYIRLWAVGLAG  
LAISQTVNGMAAGILGGAAGFLLGFILKLLIAVMLLAVSHSLNFVLTVLSVVVHGIRLNM  
LEFSGHLGMEWSGYKYNPLREAKSSPAPMQSTLEETGV\*

>SPBIB\_v1\_110050|ID:27162408|atpD| V-type ATP synthase subunit D 1 [Uncultured spirochete bib]  
MAKIKLTKNELKKKDALKMYQRYLPTLQLKKQQLQVEVRSVQTRLEQLLARKATLEKEY  
DPWIAVFSEQEKARKSNGEPLLRIVSVRTDEGNIAGVTIPVFQDIEFERSVYDLYAAPVW  
IDSALTLMEQLLRTQMELEIVTRQRELLAHELRIITQRVNLFEKVKIPETIADIRKIRIY  
LGDQQTAAQVVRGKIAKRKVEGAGR\*

>SPBIB\_v1\_110051|ID:27162409|atpB| V-type ATP synthase beta chain [Uncultured spirochete bib]  
MNKIYSRIESIVGNVIAVKAQDVAYGELAQVKTRYGMSLAETIRLDKEMVFLQVFAGGRG  
ISTGDEVRFGLGHPMQVSFSDNLLGRIFDGAGEPRDGGPMLSDNLITIAGPSVNPYKRIVP  
REMIRTGIPMIDVFNTLVKSQKLPIFSVSGEPYNQLLARIAMQAEVDLIVLGGMGLKYDD  
YLFFRDSLEQGGALSKTIMFVHTAADPIVECLMVPDISLAVAERFALKGKNVLVLLTDMT  
NFADALKEIAITQEQVPSNRGYPGDLYSQLAARYEKAVDVSDAGSITILAVTTMPGDDVT  
HPVPDNTGYITEGQFYLHGGHIEPFGSLSRKQMVNGKTREDHRSIMDAMIKLYAAYRDT  
LEKSMGFQMSVWDRKLLKYGELFEQRMMDLVNIPLKALDQCWETLAECFEPRETGLR  
SDLIQKFWVGRK\*

>SPBIB\_v1\_110052|ID:27162410|atpA| V-type ATP synthase alpha chain [Uncultured spirochete bib]  
MTEGIVTAVNGNMVSVETDGNVTMNEVAYIETGTRSLKSEIIRIRGNSVQVQVYEITKGI  
KVGKNVRFNELLVELGPGLLQIYDGLQNPLPEIAEKVGYFLEPGLYLKALSRETRWH  
FTPLAKVGDTLQRGMAIGWVPELHFRHIIMVPFDLYGEWKLADILPEGDYTIDENVAHVV  
DAKGNTKPIKMWFSWPVKRAVDCYSERLKPSEPLVTKTRIIDTFFPVAKGGTYCIPGPF  
AGKTVLQQVTSRNAEVDIVLIAACGERAGEVVETLKEFPEIIDPKTGRSLMERTVIIICNT  
SSMPVAAREASVYTAVTIAEYRQMGLDVLLADSTSRWAQAMREMSGRLEEIPGEEAFP  
AYLESVIAAFYERAGIVQLYNGQKGSVTIGGTVSPAGGNFEEPVTQATLKVVGAHFHGLSR  
ERSDARKYPAIHPLDSWSKYEGIMPQRAVQYAHSLFERGAEVGAMMKVVGEEGTSLEDYV  
VYLKSEFLDAVYLQQNSFDPVDAAVPPDRQKHMFSVLKILASQVKYKDKEDAREFFYDL  
RQTMMLDLNGTPEDSEMYDSLAKVEQALADRNPENRGLKAISALE\*

>SPBIB\_v1\_110053|ID:27162411| conserved exported protein of unknown function [Uncultured spirochete bib]  
MKRYWYFASTLPSFPFGAPPPFAQEFDALCERLVDKSDRELIQAAGAAVRGEYTGTEK  
SPFLKAFFEWERGTRNALAMLRAREFKWDPEPWIRPGSTNTDALQAAQAIHSASDPLQAE  
LTFERERWIAVERLSALSAFELDYILAYKIKLLIATRCISFQRDRGAEGFRIFYQDIVDA  
AADVASSALDTGVAT\*

>SPBIB\_v1\_110054|ID:27162412| putative V-type ATP synthase subunit E [Uncultured spirochete bib]  
MEIQVQELLERIRNEGIEATAKKQAEIIEKAQAQADEIIRAKKEAEEALTEAERRIASM  
DAASRESLLQASRDTMIALKQSVRMFVESALNADIEAFAFDKMAAQVIPEIVRILASSQS  
GDIEVLLPPTLEEKIDASIAARLSKELARGITFKPYPAIDAGFRVAVEGSAVQFDFTSES  
IAQILSVRVNRLLAEYLKEASGSLT\*

>SPBIB\_v1\_120001|ID:27162413|mgtB| Magnesium-transporting ATPase, P-type 1 [Uncultured spirochete bib]  
MTKLPLLLPFLKKRGSSANGGISSDEYRLISLCSVVQSTLSELETSARGLSEKEVDKR  
ISEFGRNELSQLKLSFWEDMFERFKSPLVIQLLIATVSAIIGEATSSIIVGAMILLSV  
GLSYILDSRSNKEVEALGKRVSRTYVLRDGAETEIRMSEIVPGDIVLLQAGAIVPADVR  
VISAKDFFVSESALTGESMPVEKTANPPAEPVKSAMELPNACFMGTSVTSGTARAVVTT  
GAHTLFGAISKKLIERREETSFDKGVRSFTWLMIRFMLVMVSVVFLIVGITKGNWLEALL  
FALSVAVGLTPEMLPMIVTVNLAKGALAMAKKKVIVKKLPSIQNLGSINILCTDKTGTLT  
QDKVVLEHHVDIIGNKSDEVLYAYLNSYFQTGLKNLLDRAVIEHVDLNVDECHLVDEL  
PDFQRRMSVVVEYEGDNVLICKGAVEEYSCCTHYQIDEEIYPLIDMIRADLFEEVQKL  
NQEGFRVLGIAAYREFRPTKTTFTVQDESQILLLGYIAFMDPPKESATEAIKLLAKAGVGV  
KVLTDGNGLVTEKVCRDVGIPTSAITGAELGALDAAAFSEKVRSCVVFVKLTPSQKEQI  
VKELRRQGNIVGYMGDGINDATAALKAADVGISVDSAVDVAKESADIVLLEKSLVLEEGI  
MEGRRIFANIIKYIRMGASSNFGNMFSVLGASYLLPFLPMQPLQILTNNLLYDFSQTGIP  
MDNVDSSELITKPKWDINNIKRFMIFIGPISSIFDYATFALMWFFFKASAYIDPGIAAAQ  
KDAIARLFQTGWVFSLLTQTLIVHIIRTRIPFFQSRASGPMLLTTLAVMAIGAWLPYS



PFAAMLGLVPLPGVYWLWIAGFLITYSVLTHKVKRWFMRREFEGA\*

>SPBIB\_v1\_120002|ID:27162414| putative PTS IIA-like nitrogen-regulatory protein PtsN [Uncultured spirochete bib]  
MDSILDALQEGRLFELPENDKNHALQFLAHIIEAFPQIPTGTDIVGNVMAREKSMNTALG  
KGWACPHARVDFEEDLMCVVGWSPSGIDYGAPDQGPVSIITMYLVPSNQRNHYLREISIM  
AKVLKSSPEIDKLSSIKELNDVRNYLLDLISASKETVGPDARARMIRLQSKAALATQPVA  
DLSNLVIEPVSIIAGTGFKPLALTQNLLELLNFVESTAGLAERLDSGTYQNGIWRIVRRS  
ATAYQGGRTVFDCAIMPAKASQKA\*

>SPBIB\_v1\_120003|ID:27162415| Translation elongation factor G [Uncultured spirochete bib]  
MSYTTEKIRNIAIIGHGGTGKTTLEHILFQGGMISKPETVDSGKTVSDYGEDEIARKIS  
VRSSLTHVNTNDCKINLIDAPGAGDFVGEAILAIRATETAMLVIDGKSGVQIETVKLWRI  
LERHQKPRMVFVTRLDEDRASFASALSDVKEKFKAIKVPVVTIPMGEFTAFCGVIDVLNRK  
AYPRPASHDQKEEATEVPPEFSEAVEAARAQLFEAAAEGTDELMEKYLLEGELTQEETLQ  
GLQKALAMGKIVPAFAGSGIANSFTAFAISFAVQSVPSPLLRTPKALDPEGNEIEVSID  
PSKQASGFVFKTQIDQFSGRLCYVKVMTGTFQPDMDMVTREAHKERIGKLYTLQGKKLE  
EVPFLPAGDIGILAKLVSLKTNDTISQFDQLISYIPLRPLSPVHMLAISAVNKKEEDKLS  
ELLYKAAEEDLTFRVNYNAETKEMVIAGMGEQQINMILDKIKAKIAAETRVPRVAYRE  
TITKKAGAETHKKTGGHGQYGRVVFIEPLERKGYEFENRIFGGA VSKGFMPGIEKG  
IHQAMEAGVLAGYPVVDVKTAVDVGKEHPVDSSEMAFKLAARGAFREAMKQANPVILEPI  
MNLVSVFVEEKYLGDMSDLGRRGKISGQNPIGGGIVQIDAQVPQAELLRYAIDLRSMST  
GTGSFEIEFSHYAPISGKIAEDVIKAAQAFKTQEAEIE\*

>SPBIB\_v1\_120004|ID:27162416|nrdR| Transcriptional repressor NrdR [Uncultured spirochete bib]  
MKCPYCGSLEDKVIDSRTLANGEAIRRRRECLACGLRFTSYERIEEKPLMVVKRDGRREP  
FERQKIERGLVRALEKRPVSQMSIENLINEIEDEAAEQAKASNEISSEDLGRMVLRKLYA  
LDKVAYIRFASVYRKYDTLNEFIHEIERLEKGGTE\*

>SPBIB\_v1\_120005|ID:27162417| SPFH domain, Band 7 family protein [Uncultured spirochete bib]  
MSYIFVGFALAAWWIVFIIVGIARKQTPIAVFLIILFFVWAVPEVLLLLSNPEFASVLF  
IVPFILLVQMMRVIPEYQRGVLFRLGRMQKVIQPGFNLVLPFGIDILRKVDMRTFTIDVS  
KQEVITRDNPVIVDAVVYFNVPVLA VVKVADYTKSTSLLAQTILRSVLGQHELDEML  
SKRAELGQILQRLDDATDPWGIVTAVEIKAVELAETMKRAMARQAEERERRAKVIAA  
EGELQASEKLAQAADVLAQSPASLQLRYLQTLTEIAVEKNSTIIFPLPMDFLKALTKLAG  
KDQE\*

>SPBIB\_v1\_120006|ID:27162418| conserved protein of unknown function [Uncultured spirochete bib]  
MTFSEKLLKFMETSVDASKEFLEKAADQAQVWGEMGKLKIEILQLRSKAQSLTAKLGAEV  
YNLLIEKNEPMIGASTPEIEPLIKELEQLGSLIDEKEALYRSKGGKDSLDNEKEK\*

>SPBIB\_v1\_120007|ID:27162419| HAD-superfamily hydrolase, subfamily IA, variant 3 [Uncultured spirochete bib]  
MQRYPALIVFDLDGTLADTIKDIADSVNRRIAMYGFEPHNVDA YKRMVGDGFLSLIEKA  
IPNDAARNSELVQEILARAVQEYAAHSLDATKPFDGAKETLKLSDRGIQLAVLSNKPQD  
LSASIVGALFRDIPFIAVWGNLPDRPRKPNPAAVLQICELANIAPQNCAVFGDSSIDMKT  
AKASGMTAVGALYGYRSRELLDAGADFLIASPQDLIALFGAE\*

>SPBIB\_v1\_120008|ID:27162420|pgcA| Phosphoglucomutase [Uncultured spirochete bib]  
MNHEEILARAKEYISFETDQFFSDEVKALLEKGDWKELEDRFYRDLEFGTGGLRGVIGGG  
FNRMNTLVVTRATQGLCDYLKEQFPDKPLSACIAYDSRRKSKEFSLATALVFAANGIKAY  
LFSSLRPTPELSFAIRKLGADTGVVVTASHNPPQYNGYKAYWNDGSQVPPHDTGIIQKV  
LKVRDVKLMPESEARAKLLVNIDKDIDEAYVAMVKSHLLRPELFSKMADSVKVIYTPLH  
GTGAMLFERIMKDLGLNVLTVPEQREPNGEFPTVSYNPEEAAALSMAIEFGKKTADVV  
MATDPDADRLGIAVPDGS GGFTLV TGNQLGSLHLDYIALTLKELGRMPPRPASIRSIVTT  
EFQKAIKAEKHGIA SFELTGFKWIADLMRQFESNGYDFVYATEESYGHLEQEVDRDKDGI  
SAAALTAEMTLYWRSSQKSLDRLEDLYREFGYFEEKGLSAYFEGEKGMQIMSGIMDAYR  
REQPKQFGGIPVWTRDIKAGTAWDRAGKISSISLPKSDVIQWRLEEGTLLTVRPSGTEP  
KIKYYILCHSVGEDLAKTKAETKRKIAAIEADIKAVIDAHRK\*

>SPBIB\_v1\_120009|ID:27162421| Exonuclease, DNA polymerase III, epsilon subunit family (modular protein)  
[Uncultured spirochete bib]

MTENNGAPLWASLFSDAQPKHEPPSPWYRKRNGAWEGVSWPDPVCGGEPWEMRTYVALDV  
ETTGLNAATERIVEFALVPFAFDAEGALIEIQRFSALVNPGIPIPLQASRIHGIRAEDVA

NEPLFGEVAPAVLELCKNRVIVGHNVMFDIGFLEGELEGGRAGYALETEECADSFGMAKIAF  
PAMQSYNLGKLAFAALGLPSDATHRALGDALTCMRLFAAAARTLANRCV\*  
>SPBIB\_v1\_120010|ID:27162422| protein of unknown function [Uncultured spirochete bib]  
MRFAAKCALFGIAGILAALLRFTMKMIAPYPTISGVVLPETSALVESTIAQSKPALNFF  
EELASLDIDRMQNASVAEVRARVRDFISTGLALGMEPEALAAELIPSSGHIIAMLIDSGD  
SEEFSDIDGVSLPAKLSYQRIALNPLMASLRSQFEAIFDSAYAILKKYGRITPFRWLEP  
EAARWKGGITLPGKFSRPRISDLDYSHTYALDIFLQDVQYLPGDIQRGPIVHSLSDGIVV  
AAETGWIGFPRTSEGLSFLAGGISPKSGNGIIISPDEHKYYSYFHLVDVFRKQQLVRA  
GQPLGHGGNSGINARKQGGGEHLHLEVFDANAGRFLRNTQLIALLKASIKKRPVAPQE\*  
>SPBIB\_v1\_120011|ID:27162423| putative Glucokinase [Uncultured spirochete bib]  
MSKTFLVADIGGTNTNLALARHDGKTIELVFKERYSTQDERSLLEPVQRFLKAASSLGFS  
EAIDFCCVSGAGPVQADETIQLTNAPWSISASELSALLGVPVRLINDFTALS AVTLLNY  
KNEAEITRPLPHLDGSLGEPADGLMLIVGAGTGLGVGVDRHKGKSVTAYPSEGGHSELPCF  
DALSHYFSEWLSERYGYPAGAELAISGQGANIFEVCTEKL DARMIAAEYGIPQPGSGS  
GLGSGLDAGLEASLDAGPSELSKGILKTPRTAWPAAIAANSRTDAHCA LTMELFVRLYAL  
KAANLVSILLPRGGVWL AGGSSKNETWLENHRFMRWF EKNYAPHIREFLSKTPVLIVK  
NYDISLLGAAEAHQFSEHG\*  
>SPBIB\_v1\_120012|ID:27162424| UDP-glucose pyrophosphorylase [Uncultured spirochete bib]  
MMKEAQLHQEIHPDLRADMLAKHIDIELALSILD RYNRGEFDHVEKIVPAGVPPVDGIHV  
VDVRNRQANTTLFKFPKREALQNL AERNVKLPEGIPETTESGAAYLLDAAKLEAIGRQI  
VPCAYGVLNNGSATSADLRKNRAIDEALFSALKPAFERYSGLCRDLPKGLTPAYINPD  
GSPGASFLELKMRARLLAANRAGFAASDALV VAPENGSA PRSSMLSTEARAGQPERLFMP  
LYQMTSMGNHDQLLSAYAELSSSPFLSTLSLRTGLDAAQWLSGKQPLIAAYTHSSEGM PK  
RIFDRAYGKEHSSLALPGGHGQCFMVLADTFRALQQGIRYAMLSNVDNLGAFIDPVELA  
ILAISGRPAGFDFA YRTPIDVKG GILVRTQDGTKNVVDIGPAIDIKEVETLEKQGEAILF  
NCATGIFDLEWLVPNLENIAHSLPVRFTDQVKDAGSYSQAEQVTWEIVSLLPDFVAF AVN  
KERRFLAAKMLAEMLLTSGFGNDVPSVPEVLRQVGAALHDGQSWLLQNVYGLELVNGCWV  
PPEIFKN\*  
>SPBIB\_v1\_120013|ID:27162425| putative Trimethylamine-N-oxide reductase [Uncultured spirochete bib]  
MGFLPYFCGKDCGGDACPLLA EVEAGR VVGMHHPAAGQWIRACGKGMRAHIEHYSPHRI  
TKPLVRRGPRGSGDFVEASWDEALALVARRLSEIRAEGGPGAVMSIASAGSTGALHNTEV  
LALRFLNAIGGAVHVSIGNYSSNAANYALARIFGASVGETGFDPASTAFSNLIVLWGANPL  
EARLGAELPSRLVEAKKRGSRIVAIDPRYSRSARGLGAEWIPVRPGTDPALGYALLYEIV  
NSPQYDHEYVAERTEGFDALVRFVLGEIDGIPKSPQWAAPICGIEESMIRRLVHLWWQDQ  
PVMLIPGYSIQRVEYGEEAFRLTVAIQLATKNSGKLGASSGSINNRLPGITIAKMREIPE  
SIPSETVYSKVPVLRWADAVLNPQQYGLGKIRMLYSAGGNFLNQGANIQKNIEAFEAVD  
FAVCHELFLTPTARYSDVVLPAADPF EKEDIGIPWAGDYVLYKPKIFEPEGMARSDFQIF  
SELAERLGAKEIFTGGKNESQWIAYLMAESGIPDIEAFKQSGFYAMPQRLRAGLDAFFAD  
PGSNPLQTKTGKIEFSSPLWTYEMARFWEQRNGAKEDNAKEDDTAPKGNADPKAPKKGG  
GELSAGSSFKLLTPKVAEYVHSQRGAFPSAKKARVHMHPEDLALIGATEGAVLCIRNDY  
GAVLAVASLDANIRRGTVWLEEGAWAEPENGLDPNGSANMLTSDRGTTLESTSCIMHGIEV  
WIELPPGARS\*  
>SPBIB\_v1\_120014|ID:27162426|lon| Lon protease [Uncultured spirochete bib]  
MSTSELIPIDQILPNKLPITLVGKPIFPGIFTMIGKEPDIQLVEQAISTDGMIGLVL  
QKDDTDEPSAGNLYQVGTAAKVIKKINLPDGGINIFISTFKRFKVKKYMSKEQPIIAAVT  
YLDDTNYDTDEVKALTRALISEMKQLSEN NPLFSEEMRLNMINIDNPGKIADFIASILNI  
EKKEQQEILETL DVRRERMEKVLIHISKEKELLRIQKKVQAEINEKIEKSQRDYFLREELK  
AIKQELGMAGDARSSDYQRFREKIDSFNLDGEIKEIVEQELEKFNLMEPSSEYMVTRNW  
LDLVCSLPWNAPLSADFDIKHAQKVLEEDHYGLKDVKDRIEYLA VRKLRDSRGTILCL  
VGPPGVGKTSVGRSVARALGKQFFRFSVGGMRDEAEIKGHRRTYV GALPGKIIQGLKLT  
SRDPVFMIDEIDKMGISYQGD PSSALLEALDPEQNFSFRDH YLDLPFDISNIFFIVTANT  
LDTIPRPLDRMEVIQLPGYVDVEKIEIARHYLIPRSLERNGLAKNQVKYTRDALLAMID  
GYAREAGVRNLEKALDKIHRKIAKAI VIENKQEERFVIDKHA VEKYLKPIFRDDELKRA  
TRPGMAVGLAWTSMGGDTLIEAVANPGKEGFKLTGQMGSVMQESAGIAYTYVRNIAAQK

YNIDAQYFESRQIHLHIPEGATPKDGPSAGITMATALLSLVLGKRIKDRLAMTGELSLTG  
QVLPIGGLREKTVA AKRNKIKEIIPA ANEKDLDEIPEHVKKGLVFHPVTRMEEVIDIAI  
GS\*

>SPBIB\_v1\_130001|ID:27162427|queD| 6-carboxy-5,6,7,8-tetrahydropterin synthase [Uncultured spirochete bib]  
MYHIRVEAEFAAAHRIVHYNGK CERLHGHNKVRVWVSGATLGDGGMLIDFAVVKNALKS  
LIAEKLDHRDLNEIREFEDDPSAERIAKYIFEQLSKALPDVPLSAIDVFETDASMARYVP  
DR\*

>SPBIB\_v1\_130002|ID:27162428|murE| UDP-N-acetylmuramyl-tripeptide synthetase [Uncultured spirochete bib]  
MAKFLSDLIAGLDILEIRGKVERPVSGVAYDSRDCKPGFLFFALPGIHTDGTKEYIGDAIR  
NGAIAVVHEGALKSCPADITTLRVADCRWAMSAISSTFYENPSSSLCVIGVTGTGTEGKSTT  
VFLIYQLLNLTGFRAGFFSTVMSDTGEGEKPNPQHQTTP EATAVHEMLANMRDNGLRYAV  
VEASSHGLSLRTARLAHVAFDIGLVTNVTHEHLEFHGTWEQYRSDKANLFRHLGENSSKK  
QLVGLSCAPYGIVCADDPSASYFIEQSAVPCKTYSSKGF AADLIAADIKSDLEGSDFSV  
GTVNSQRTRIRARINLPGAFNVQNALGAILATS AATRLHWSAFIPYLPKLPVGRMQR  
ITGQPFVDIIDY AHTPSSFKEILPLRSTTKGNIICVFGSGGERDRAKRPQQGRIAADYC  
DIVILSDEDPRGEDPRALLEEIAAGCELP RGERLFLIPDRPTGIRKAFSLAKAGDLVLL  
LGKGHENSIIYADR TIPYDEEATALSILAEMGFCRKGKT\*

>SPBIB\_v1\_130003|ID:27162429|ddl| D-alanine--D-alanine ligase [Uncultured spirochete bib]  
MMKTIAILYGGRSGEHEVSLISASSIIAYLEKSKYR VLPVGITKKGEWYLQHLPEWAFVP  
PEKGIMRSLPAIEPGERVVA VPGDGLWVEQAKGLKKLDIDIVFPVLHGTFGEDGTVQGLL  
ETADLPYVGADVLGSAVGM DKEASKRLWLSAGLPVVDYISVGEEDISDGNLQALTRRIET  
RFGWPCFIKPCSCSGSSVGT SKVSQPEMLKNAVASALRWSERALVEAYVEAREIECAVLGN  
EHPVAFPPGEVVP SHEFYDYEA KYKDPNGATLLIPAPLAEETRTRIMSLAVAAYKYASIK  
GMARVDFVVEKLTGAVFLNEINTIPGFTAISMYPQMCIQGGLAYPDLLDKLIELGLENYS  
KKRSLEYDFSKS\*

>SPBIB\_v1\_130004|ID:27162430|rocD| Ornithine aminotransferase [Uncultured spirochete bib]  
MNSQDYITLDNRYGAHNYHPIPVVISKARGCKVWDPEGREYYDFLSAYS AVNQGHLHPHI  
VAAAKA QLELVTLTSRAFHNDKMGLFLKKLCDYTGYEKALPMNTGVEAVETALKAARRWG  
AEIKGIENGKQNIICAAGNFHGRTLTA VSMSSDPESYVNYGPYVPGFVRVPGDAEAARA  
AIDKNTVAILVEPIQGEAGVVVPPDG YLSALRKICTENGILLIFDEIQTGFCRTGRRFAW  
QYEGARPDIMCLGKALGGGIMPIS AIVADHEIMDVFTPGTHGSTFGGNPLADAVGVAAIE  
VLEQEHLEENAYRLGEHFRKAVRAVSSPKIRLV RGKGLLNAVVEENFDA YPAACLALKEN  
GILAKQTHGNIIRFAPPLVITEDELEDALARITGVLASV\*

>SPBIB\_v1\_130005|ID:27162431| exported protein of unknown function [Uncultured spirochete bib]  
MLKRLYIAAFLVAFALAAWLVALQRQETLQASIPIENRTVMLESSNEKNQVQQQSAVQQR  
ARIAPVPEEIFLKTIDLNLDDDEDFEQVIISRKSTSSQALSIVIAKFSPALGIYFRYFDG  
EIAATKSDSIIVQPEDVTGDGIVDLVVQGLDASNNQTLTIFRRLSDRGYAKVFSGRGASV  
VLQENTETEK PRAASILETREIGSNVLLQSKYIWNRLSAFEKTSEIALDQKARPIFAG  
PSGVDVGAFLSWMDRLWTNSDNTAGARFLYLD AKNQELIFSDQQIQQRWIMKSSERNR  
LYITCSTSESSDLDRVVVIEARAENEIAVSVIDQQIATFRRDEGWSSIYRTASMPNAVAT  
EHPKMPQFDQSFLFRYLGDEGSVLV LSPVKSILVIKGYREGIARLYEYDGRQVLDLFLQ  
IQQNGLASERYFY LISIEQSKDGSVERLHLEPATMSADGVSISYLSPIYIFKKTS\*

>SPBIB\_v1\_130006|ID:27162432| exported protein of unknown function [Uncultured spirochete bib]  
VSMRGKARNGTGDFWRPRAYLAFLFLFIASSVWGQTYRNL SQARQAASSAKTADSLTTVL  
KTAITQLPVRDSIALCEEFE PKVPAAFKAELRGTVGGLYLLL GQINDAKSWYAKAAGLDK  
KYTMQALRLAIMAGDQKT V LQLL KSESLSRESQEIAAIWISLLDGEYSKASATANQALSS  
TTDPQSRREILFLKYIADFGLYGTANSSILKEFPLSIEADMIQGVFSSAPLILSVGLSW  
LGSPTILADLAQKNLAKQDNKSDSGQWLQVGYFSAKENAERLSRNL SAKGYQTRIVETK  
NSNGDSRWAVHVA AKDDWQKTQSM LKDQGYESYLVQP\*

>SPBIB\_v1\_130007|ID:27162433|miaB| (Dimethylallyl)adenosine tRNA methylthiotransferase MiaB [Uncultured spirochete bib]  
MKQYHIETYGCEMNKAESAAMEATLREHG WKR VSEQDADLVILNTCTVRTTAENRAWNRI  
SQLSARKKERAFALAVVGCMAEQHKGAIQKKAPGVDYVLGTFQKQSFGLMLDLVAKGEKI  
DVLEETPTYVFGASYHEPGA FRSFV PIMHGCNNFCSY CIVPYVRGREISRNP SNILKEID

QLEDLGVREITLLGQNVNSYRWEEQGHVLDLDFPGLLKLARHLHDRQSSDAHGRIGWIRFL  
TSHPKDLSDSLIDTIAEDPIFCRHIHLPVQSGSNSVLARMNRKYTREYYLSLVDRLLKAAM  
PDLTLSTDILVGFPGETDDDAEQTLDMRQVRFAYSFMYHFNARGGTPAASMPDKVPDKT  
KKQRLARVIALQKEITSALMRERLQGTDEVLIIEGVSRRSKKEVLARTARDEMVLPAQAQ  
RIGQFARVKLVSIISGNTFRGEEV\*

>SPBIB\_v1\_130008|ID:27162434| membrane protein of unknown function [Uncultured spirochete bib]  
MESNLPVDPKNLTDKGTAKVMSTAAGLGMGLGNALLGIPVVGTVISAGLLGLGAIGLFGK  
SKTDKASGTVLAAAGIAGLTTLFIPGVAHSLLSLGGIGLLGFGVFNLSFLKGLKSKK\*

>SPBIB\_v1\_130009|ID:27162435|foIE| GTP cyclohydrolase FolE2 [Uncultured spirochete bib]  
MVDVQSFQDDRHIQKVGKGLRYPITLLDKTEKYQHHTAVVNLVANLPRELKGTHMSR  
FIEVFDEYRHDLSPNVIRMLRKIRTELDAQSAYTDIHFPYFINKAAPVSGQTAIMS YDC  
FYEASCSEKGRFIAGVIVPVQTVPCSKAISDGGAHNRGLVTLQVSLGPFWFEDLIR  
IVEESGSSELFTLLKREDEKFITEKAYSQPRFVEDVVREVYLKVDALNRFPWFSVEAENF  
ESIHNHSAYAYVEKSERSKIEPVHEGHGKIDTFMLD\*

>SPBIB\_v1\_130010|ID:27162436|foID| Bifunctional protein FolD [Includes: Methylenetetrahydrofolate dehydrogenase  
; Methenyltetrahydrofolate cyclohydrolase] [Uncultured spirochete bib]

MSAVLIDGKIAEEIRSELGKVSALRTAGVVPGLAVILVGENPASVSYVTAKEKACEEI  
GIQSFETRFPENVAESVLEKIAACNRDPKVHGILVQLPLPRHIDERRVIGRIDPSKDVD  
GFTPINLGRMLLEPCYIPCTPLGIIELLRSGVPTNGARAVVGRSNIVGKPLANLLIR  
KSVNATVTVCHTGRDLAAHVKEADIVACAGKPGLVSIDMIKPGACIIDVGVNRPDPPT  
KKKGYRLCGDVFEEASKVAGWITPVPGGVGPMTITMLLSNTIDAAARISDIALQ\*

>SPBIB\_v1\_130011|ID:27162437| conserved protein of unknown function [Uncultured spirochete bib]

MGETEPNELAKIRAQYLGNETIKELSQSNPTKVGLKRSSEFYRLDAEGNCIYNPEPQGL  
TAAREALSMHFAEKGRGISPDNLFFCASTSEGYAWLFLKLLCDPGDVVLIPKPGYPLFEHL  
AMLEFVRTSAYPLEYSHPSGWHIDIAAIARYLETQQGRRAKAIIVINPNNPTGSYIRASE  
RAAILELCERYELALIADEVFFDFPLSDSIECASFIGEERVLTFVLDGLSKRLGMPQMKL  
GWICVSGPSMLESRAKKRLELIADTFLSAGTPIMNALPRLSSEDSFLEEMRRRIRENYA  
IYRSILEFNESPHRVLACQGGWTALVESPSYMDEEKTAALLLLQKGIAAQPGYFFDMEKG  
IHFAFSLILPQDSAAAWSERYDRFFENLEAR\*

>SPBIB\_v1\_130012|ID:27162438| CoA-disulfide reductase [Uncultured spirochete bib]

MRLVIIGGVAAGATAAARARLDENAEITILEKGPYVSFANGLPYRISGDIQKRGLLIL  
QTAEGFFARYRVNVMNLNTEAIGIDRQNKVNRVVRTKDGSEVPYDKLILAQGGSPIRPIE  
GLDSPNVFNLWTIPDTEKIEAFIKEHAPKHAIIVGGGFIGLEAAEAFQKRGISTTIVELM  
NQLMPPADPEFGAQIAEALAEHGVDSITGKSVVRIDWNARTATLNDGSTLPADIILLAVG  
VRPNLELAKQAGLEIGSSGGLVVDEFRLTSDEPIYAAGDMIEVIRKPDGAKVRIPLAGPA  
NRQGRIATNALGGSMYSGALGTSVVKVMDYTFMSMTGLSEKAAAAAKIDARAVTIHKAH  
HATYYPGYEDLSLKIVYRREDGKVLGAQAFGKEGVEKRIDVLAVAVYAGLTLQNVAEIDL  
SYAPPYSSANDPMQMASFAALNDMQGFSKFVSAQEAIALIKQGS AKVLDVRTYVEYLNH  
IKDSMHIPLDELDRIEEIPDENLLIVSKAGFEGHLAYRQLSQHGRNAIRYITGGYMSLR  
LLKEAQNIIEEGE\*

>SPBIB\_v1\_130013|ID:27162439| Rhodanese-like protein [Uncultured spirochete bib]

MALNPVEELIKNGAIVDVRTEEEFEEEHYPNAKCIPVNEIMQRANEIGPKDKPVVLYCA  
SGARSA YAARILKSLGFAKVINAGGLYDMPNY\*

>SPBIB\_v1\_130014|ID:27162440| Extracellular solute-binding protein family 1 [Uncultured spirochete bib]

MERLRKGLLDFLGFALVSILLVLSGCGGGSKSKTLYIFNWTYYTPDSVIQKFEKEYGVKV  
VYDTFASNEEMFAKLKAGGSNYDITFSPGDYVSIMIKEGMLEKIDKSKLKNYGNIDPAVL  
ALCDFDPGNQYSIPYYMGAAGVAVNKTQVQNYDKSWSIFARKDLANRMIMLDDMREVMGD  
ALKYLGYSVNTVDQKQIDEARDLNNVWKPNNLKFDAEAFKSFSAAGEVWVAQGYAESIF  
AEVDKANWKDVDFIPKEGGPSYLD SMVILKGSKNKDLALKFIDFIHRPEIYA EFCDYFG  
FPSTANV PARALKKGESWYRPEDLLNCELKKDVGADLEKYNAAWQAIRVGK\*

>SPBIB\_v1\_130015|ID:27162441|potC| polyamine transporter subunit ; membrane component of ABC superfamily  
[Uncultured spirochete bib]

MHALKKPKAIRAILWRTRRMLRKGGAARKFMPARSSLSNVIIYVWVIGFLFLPLFVLVL  
YSFN SGRQATWQGFSEWYQKLVMA SPELWRAFLNSVIIAFGSAMMSTIIGTLAAVGTAR

YSFKLKS FVSTMSFVPMILPEIVVGVSLLIFFAGVGLKLG L AT V W I A H T T F N L P F V Y L L V  
SARLEESDPSIVEAARDLGANEMQILFRILPMALPGILSAFLTA V T L S L E D F V I T F F V T  
GPGGTTLPLYIYSMIRFGVSPVINALSAVMVAGTVLLIYPMRNFLKVFAAR\*

>SPBIB\_v1\_130016|ID:27162442| ABC-type transporter, integral membrane subunit [Uncultured spirochete bib]

MKKQVGLYYSLPQIMWLLVFFAAPLGIIIAYSFLKKGLYGGVEPQFSLEAYTAMANPNIL  
IVTWRTLKMSVIATILTLIIALPCGYSIARSQNQAMRFLVIVPFWTNFLVRIYAWIAIL  
GNEGFLNDIIRALHLRSESVQFLYNQTA V I L V L V Y M Y L P Y A I L P L F S T I D K F D F T L L D A A  
RDLGASRFQSYVRILLPNIKSGLVTAGLFTFVPIFGAYA V P L L I G G K D S Y M L G N I I A D Q L  
TKTRNWPLASSISMTVTILTTGLVFLIAMRKPREQKQVFDADPGLITPVASGR\*

>SPBIB\_v1\_130017|ID:27162443|potA| polyamine transporter subunit ; ATP-binding component of ABC superfamily [Uncultured spirochete bib]

MKGADV DIVGVSKFFGFSFQALKNVSL S I S K G E F F S L L G P S G C G K T T V L R L I G G F E E P D S G  
TIAIEGKNVIGLPPDKRHCNTVFQSYALPHLSVFENVAFLRIRKIPQQLVREKVMRYL  
SLVQLEMHAACKPSQLSGGQRQ R V A I A R A L I N E P S I L L L D E P L S A L D A K L R Q H M L M E L D A  
IHDKVGITFIYVTHDQQEALSVSDRIA VMNMGEVLQIGTPRQIYENPATEFVARFIGETN  
VFSLKILSIDGTKIYGEVDGLGPMFVDD E T D A K P G E T V L A T I R P E K I R I S A D L P N T N G G R  
INVLHGIVA E P I Y S G F Q T K Y V V Q L D T G M M V T V Y R Q H A N W S E G I P D I E W K D E V Y L S F S A S D  
MVIVEMHEQ\*

>SPBIB\_v1\_130018|ID:27162444| Glutamate formiminotransferase [Uncultured spirochete bib]

MGKPLVECVPNFSEGNDRAKIEAIANVIRSVPGVSLLDVDPGADTNRTVYTFVGGSPDAVK  
NAALEAARAARELIDMRMHKGAHPRIGALDVCPFVPVSGISMEECVALARDFGQKLAEEF  
DVPVYLYEKAATRPERQSLADIRAGEYEGLSAKLSDPAWQPDFGPARFDPRWGATVTGAR  
EFLVAYNINLNTKDKKIANDIALAIREAGR T T K D P N G N T I K V P G R L A A V R A I G W Y I D T Y Q  
CTQVSINLLDFRKTPLHLVFDTVREEAEARGVYVTGSELVGLIPLEAIRACGQYYRKKMG  
KSPGLADHELVEIAVQTLGLRSVQPFEPK K I I E W A M S E I S P L V T M K V A S F V D T V S S D S P  
APGGGSVAALAGALGAALAAMDANLTVGKKGYENVFEQLSALAVRAQELKSALLEIVDED  
TKAFNAVMDAMRLPKSSDSQKKMRDVAIEAAGKQAALVPLHTARLCLDTMKLSLEAARSG  
NANSATDAATGCNMAHAGLQSAIMNVRVNIKT LADEKFKS Q L A Q E C V A L E E Q A E A E K A E L  
DRFMTSVLAG\*

>SPBIB\_v1\_130019|ID:27162445|tatC| Sec-independent protein translocase protein TatC [Uncultured spirochete bib]

MTYIEHLAELRKRLIVVIVFFLGF SILCFGWSKQLATFLVSPAQPVDVFLSPPDLFMTY  
LSLSLYAGFILSLPIILYEVGMFIWPGLEKRERRAIFLSLLL GALLFIGGA AFGFFVMLP  
YMLRFFLGFGEIKPMISIRDYLG F V G Q I V L S F G L A F E L P V V T T A L A G L G I I T S A Q L K S  
ARKIAVLLIFIVAAILTPPDVISQLLLALPMLVLFEGSIVLASLVEKKS K S K V Q E A A \*

>SPBIB\_v1\_130020|ID:27162446|tatA| Sec-independent protein translocase protein TatA [Uncultured spirochete bib]

MFGRIGPMELILILVIALVIFGPKKLPEIGKAIGDAFKAFKKTQEDVTKEVDKITS D S P A  
KSSDAKESVQKDADKNETAKS\*

>SPBIB\_v1\_130021|ID:27162447| protein of unknown function [Uncultured spirochete bib]

MEGKEKLAFSAVILNGGQGVRFGGIDKQLLEIDGVPIGFALAKTLVQSCEEVLIVGKKNA  
IYKPLEVQQIEDAVPGLGPAGLLAGMMKARADWIYLC A V D M P F F S Y S L S K Y M Y G R A L S K  
EADIIVCQYKGELQPFFAFYRKS L A G A L A S F V T S G V K P S L R R F I S S R S Y D L V S L K E L Q D I  
GEQEAIFCNINNSGSLDAARQIALEHGLFIDTRL\*

>SPBIB\_v1\_130022|ID:27162448| protein of unknown function [Uncultured spirochete bib]

MPSLSTFMQILKWADWDSPEQMNCAMPFGEILQTIAQLLPVLDAAPERMDTISPDQAKD  
LLDSAIRLYILAPSIVNVLLNYKICVEHGLPLHPTVYYELKEARKYRISHSLGEIQRANE  
LFWKSIDVARACCRLDQRACQDLANFASEL P F S V K S F I Y T A V Q D T Y T W I G S Q P S L L L A L A  
DKIRTSYTPHLVVA A A H G S I M P A L V L A E L L Q V P L Y F V R F S M F K R H D E E P I V S L S D Q A W L F  
DFRDKEVILYDEDVAGGRTLESFLKRLSPLFRQSKTAC SIRHAGSSI Q P D F F G K I W W E \*

>SPBIB\_v1\_130023|ID:27162449|rex| Redox-sensing transcriptional repressor Rex [Uncultured spirochete bib]

MKMKLSYAPSIRRLPSYLHIIRTFQRTGEPYISGTWIANELNLEPIQVRKDLAITGIVGK  
PKKGYPVEQLISAIEHYLAWDVEQKAIIVGAGNLGSALTGYQEFRNHGLHIVA A F D S D P A  
KVGKSVHQIQIYKMDQLKEIVEAMNVT L A I L T V P S P Y A Q S S C D A L V A A G I R A I W N F T N V K  
LKVPDDVLVQREDLSSGYAILSVMRTRSEHLS\*

>SPBIB\_v1\_130024|ID:27162450| protein of unknown function [Uncultured spirochete bib]

MRILVISGQRGAGKSSLCRYIAEYAKARSIACYGCIETSLRGKNGVPYQIGLADLASGQT  
YLA AERPRDRTDVVPFQFHTEAFAHIQASHEEFLHRTSASIQTSAPERFGQSHEKEICIID  
EIGPLELERHLGHADFLKMVLNRRCDVLTVTRSSLQNALLAQLNENIPQYDVLIIIEID  
KKSRRAAQNAALS YIGLA\*

>SPBIB\_v1\_130025|ID:27162451|iscR| HTH-type transcriptional regulator IscR [Uncultured spirochete bib]  
MIEKEVPMRATTRGLYALKAILTLAKTSDGQTPVSLHQIASFEGLSPEFLQQIFYRMRK  
AGIIQATRPGGGGFYLSKKPEEISVYEILLAAGETLEIVPCAPERSRRRACEQFSSCDAG  
KFWSKMEILIEYARSKHLSLMTAGGI\*

>SPBIB\_v1\_130026|ID:27162452| Orotidine 5'-phosphate decarboxylase [Uncultured spirochete bib]  
MDFFERLESIIETRDSVLCIGLDPAFSAEEIAAKGKHACADQALERNVRIIEATADCVAA  
YKPNIAFYEALGDAGMAALRKTLD SIPKEIPIIIDAKRGDISSTAAAYAHALFGELHADA  
VTLNPYLGLDTPFLEWKGKGFVLCRTSNPGAGFLQDIIIIEGKPLYIEVAKRCAALQK  
KVGLVVAGNDLEALRKVRAVAPSQWFLSPGIGAQQGQADLAFAGARDGKILVVAARS  
IADASDPAKAAVALRDAMRTARDTMLKQNK TENIQAAPA AAKAAQKAIADLKKAFVDALL  
STGCFRLGEFTL KSGKKS PFYIDLRKL VSDPRAMKIAAQAYASLASECEYDRIAGIPAAG  
LPLATAASIEIGKPMIWRMPVKEHGTGNRVEGEFRAGEHILLDDLITGASKIEAIDI  
LRSEGLIVQDLVVLIERGAQGRQDMGSAGVNLRAFIHVKELFDVLLQNGTIDSRKYEQLM  
EYVAQE\*

>SPBIB\_v1\_130027|ID:27162453| conserved exported protein of unknown function [Uncultured spirochete bib]  
VRRIALFLVLLTILTPVFAQDNQSKGFDL GIVLGTDLLPDPKDTTIPPAMD SWTKVGF RP  
EVAFGKLA VGLDLTFRFKFASGSTTSFEIYEPDWIPQPGKTTILDVYLPKLLYVRYGFQ  
IDPFYFKAGSISDFNLGNGLIMDNYSNMLFLPQRRIFGMQVGV DGNLFGFPYVGIEALSG  
NLAKFDVIGGRVYIRPLAFMNKSLFGRLQVGAIGVYDRDPLMYADDTAYGTSFGTSSPTY  
VIGVDVTLPIQLNPLFSLTTFAEGAMEVNKAMGAMTGVRGRL LGFISYGLQLRYLQDNFI  
PAYFDTNYDLYRAERFAFIRDNPAGTAYTPSWLASAGVDIFKSLINVRATVDAPFKALPS  
PATSNPADYPHLLGRLTLNKGLIPNFSVAARYEKYFLGKKSGNIFSDLIDPTDASIGMTV  
SYWAGAAVVSLDYIYSWNPTKNDFDVSSGLSIGFQL\*

>SPBIB\_v1\_130028|ID:27162454| putative DNA mismatch repair protein MutL [Uncultured spirochete bib]  
MMGVIRILPQETSRRIAAGEVIDRPASALRELLDNAIDADARDIAISIAQGGIEEITVTD  
NGFGMTKEDLELSVLEHATSKIYEPDDILKARTLGRGEALASIAAVSRLEIASRPRGSN  
EGWLLRSVPLQPPAIDAFCKEGTRVTVRGLFESYPARKQFLKRPQSEALLCRTTFIERA  
LSHPHLTFRWQSANDA EVFLPGTHAERIARCYPDLAHAPLFD AVSEAQGLHIHIVYADIS  
VYRRDRKYIQVFNRRKVPEWGVLSLVEYEF AKYLPGGAHACAFLFLEIDPGLADFNHHP  
AKKEVRLKNAQEVHAAIHALLSSELKARYSGSTQDLSARFSDMQEPEFFAADRSQPQLNF  
AASAFETRREQEWGARWPSFSEAQNQKRAASNSLPADFWQKIRANNENGPRIYGRGPGPF  
LLFELDGILFIMDQHAHERILYDRLKAKEGISQSLVPYLIDPEDNEHFLEEAQALEF  
IGYRISKEESA WAVEAVPAIAASQALEALVEWLHQPSVESTPLDSIAAALACKAAVKDGD  
ILDQAAERLIAEALALKEPRCPHGRPVLIAPREKLDAMFGRTLA\*

>SPBIB\_v1\_130029|ID:27162455| Metallophosphoesterase [Uncultured spirochete bib]  
MKKKLRILCVADEVDLLVYSSQINERFADIDL VLSAGDLPDEYLEFIASMLNRPLVSVAG  
NHDRSDSPRDRESLRYISDQQRPG LGRIRFSIKKESGISILGLPGSIRYNNNGQNQYSDAW  
MTCKIICMLPRLLIRLLFGRSVDIILAHSPPRGIHDGGDPAHTGFSAYRWLIRVAKPYY  
FIHGHVHLYDLQSLRELNVGDTAVVNVYGH SVITLLKEDRDAG\*

>SPBIB\_v1\_130030|ID:27162456| conserved protein of unknown function [Uncultured spirochete bib]  
MPDDFHTQAEMDFYRAKTKALTARIIGMLKPSVTDLMPFEEAKQLLK PQSETYRGITTV  
LDKIIGSEGRYRDFTRFFFPKKEHLKARWTGIDTLHYKDIVLPPILYEMGGVYFVRDGN  
HRVSVARSLGQEYIDAEVISLQSEIRLNADMSIDDIKHAVIEYEKKRFYQETNYPHIVGT  
DDLDFSEPGRFD TIREHVYVHKYYLNQHMTEEIPFHQALYSWHENVYQPLGQAIEAENLL  
SLFPGRTVSDLYIFLVAHWDDLKRKYGRYVEIEEAESFKSQARSARKK PAGMLKALILN  
FAKKVKNFFEKS\*

>SPBIB\_v1\_130031|ID:27162457| putative 1-acylglycerol-3-phosphate O-acyltransferase [Uncultured spirochete bib]  
MSMLINSAIVIGALLTLFALEFSLVLEYIFAPRSRKNALCSRYEQYGAKLLFGLFRIFRG  
FNVDIRNPRKLHIPKHCLVIANHQSLLDIIVLIYMLGFERMPRFVAKKELQFGIPLVSFT  
LRKGGHCLIKRRGAPIDTMR SISKMAR SCKLEQASPVIFPEGTRSRDGR LGVFYAAGVRK

ILEIEAIPVAAIAIDGGWRVATIRDFLRRFGKEPYVVEIVEIYEAPRGKHEIARVLDDAH  
KKIGMSLETMRSLI\*

>SPBIB\_v1\_130032|ID:27162458|rpsT| 30S ribosomal protein S20 [Uncultured spirochete bib]  
LSARNLSAEKRQRQNEKRRLRNKSAKTAIRSAAKKVVVAATEKKDTTAAKEALLQMIKLI  
DSAAHKGIVKKNTAARKKSRMQKLVNRLG\*

>SPBIB\_v1\_130033|ID:27162459|hup| DNA-binding protein HU [Uncultured spirochete bib]  
MADKLTKAELIDALYESLSPSSRTTRKEIHELIDGLFSEIKSAILEGKIVELRGFGTFEV  
KLRKGRSKARNPKTGEIVSVSDHG VATFRPGRELKKASWEMNTDRIPKSFRKRD\*

>SPBIB\_v1\_130034|ID:27162460| protein of unknown function [Uncultured spirochete bib]  
MKVLSFEPPEPFATQIGQSVILNGKLRSNLPLSLRCTLRGSIEGTFVRIERSAHIEANSC  
TVQNAVIAGCFTGRIKAVDSL VFLPSSHISADIYTARLQIIEGATFEGGIEMPGFSATDD  
VTGTSH\*

>SPBIB\_v1\_130035|ID:27162461|rho| Transcription termination factor Rho [Uncultured spirochete bib]  
MAIYRRKKSAPAQPESPDTTNYDSSLTKEDRIMNESQVEEQFSANNGTLFDEHTVQPPED  
KDQNHTDVHSTDSTRNQTQKARRPVAKIRLKKKPSNTHIEQEESEQIVEETEPESAIESS  
NGFVVASLPSDDHQHQKFAEASRLELESRADQRNETRARLSINDLSKMGIVELRELGAKN  
GINHDLLITLKKQELIFNILKAHTEHGIIYAYGSLEILPDGYGFLRSPQNSYLPGTDDI  
YISPSQIRLFNLKTGDTVYQGIRSPKEGERFFAMLRIEQINFNEPSVAQNRIPFENLTPL  
YPTQKLNLETATEEISTRIINLFCPIGKGQRALIVSPPRTGKTILLQKIANAITANHPEV  
YLIVLLIDERPEEV TDMERTVQAEVISSTFDEQATRHVQVAEMVLEKAKRLVEHKRDVVI  
LLDSITRLARAYNQTVPTSGKILSGGVDSNALHKPKRFFGAARNIEQGGSLTIATALID  
TGSRMDEVIFEEFKGTGNMEINLDRRLSDRRLFPAINIKKSGTRKEELLTEELQKIWV  
LRKVINPMDDIEIHELLDRMMKTKNND AFLKSMNTPYQGMD\*

>SPBIB\_v1\_130036|ID:27162462|rpmE| 50S ribosomal subunit protein L31 [Uncultured spirochete bib]  
MKQGIHPKYELTTITCAGNVFETRSTVKNIQVEICSACHPFFTGKQKLVDTAGRIERFN  
KKYGIKSSSENK\*

>SPBIB\_v1\_130037|ID:27162463| Non-canonical purine NTP pyrophosphatase [Uncultured spirochete bib]  
MELIATNNHYKAHELKPLFPRHALLLPADLGIADFNPEENGTSFFENARIKAEALYALV  
HKPVLADDSGLCVDALDGKPGIESARYGSVNGHLLSADEKNSLLSQLAGIRNRQCAFVC  
CLVLYLGKQRFIAVEETLEGQIGDAPQSGHGFYDPIVFLPSYGKTVAELSAQEKNRISH  
RGKAAQRMAAILDALEGNLLD\*

>SPBIB\_v1\_130038|ID:27162464| protein of unknown function [Uncultured spirochete bib]  
MDSKNYIELVRRMYAHPRLYGFFSEDEISEALSRYRSRIETILDRAEKESITREAYLLSS  
MRFVAKSVHRHYSSNLSENAYVYSHFSEDAVLEVPADAFFDRNRRRIQDADTSGIGFSP  
QVFIGKLAPERRLLYLVIKCAWDIDEELLGKCSYALGMPEQYLFNLIELVKRRTEASRS  
QIHLNEKLNILWIRMRVLELRDLTAIAKSDREEVRSCLERCRCRKYRQLLEKRSRHKSSI  
SNEFISDLLNVPKGSVDSGLYLRKNAQSRKPLAEYQELG\*

>SPBIB\_v1\_130039|ID:27162465| protein of unknown function [Uncultured spirochete bib]  
LCDRVEQKSFCVVLSDPVQALSVAEDSRICPPNIMPFPIAKLEPY YCRVRAEISLFRP\*

>SPBIB\_v1\_130040|ID:27162466| DHH superfamily protein, subfamily 1 [Uncultured spirochete bib]  
MKPAPKSLLEFIEGHDCFYILGHREPDGDCIGSQLALASMLQSMGKRAHVLSSGPFNRIE  
ILPFEARFKSEVPAERDFERTAALVLD CSSMSRIGNIAERMPDIPAAFIDHHATAGAVGP  
YDWLDESAPAVSAMILLMEAMNHAPTKEEAELLFFGLSTDTGFFRHLDEHSSETFRIAA  
RLVDAGVSPKR VFMAINGGRTLASRRMLGELLRIQPY YEGRLLVSWVTIDDQQKYGMSS  
RDSDLLYQLMMGIVDCEVCFVVKQETDDMCTVGLRSRDSVNVAKIAEKYGGGGHRLAAGL  
SMNGKVNQVVHTLVDAFSSVFS EDTEGK\*

>SPBIB\_v1\_130041|ID:27162467|argF| Ornithine carbamoyltransferase [Uncultured spirochete bib]  
MNPSALKGRSLLTWIDFNPEEIRYFLELSKKVKEEAKKGVKQRFKGKTIALLFEKRSTR  
TRAAFETA FGEEGHPVFLSNQDIQLGSKESIEDTARVLGRMFNAIEFRGFKQEYVEILA  
KYSGVPPVYNGLTDL YHPTQALADVLTIEESFGSCKGKQLCFVGDGRNNVARSLMVISAKL  
GMHFTIVSPKELWPDNELKNCETYAKDSGSKLKITDDIEEGVKGADAIYTDVWVSMGEE  
ALKAERIKLLSSYQVNAELMAKTGNPNCIFLHCLPAVKGEEVTFDVIIEGPQSRVFDQAEN  
RKHTIKAIMLATI\*

>SPBIB\_v1\_130042|ID:27162468| Endonuclease III (modular protein) [Uncultured spirochete bib]

LCALACCNMAIVDNLMSTQNSRPSKILASYSVPALLDEVYGRVPIWPDAPHLLHYRSC  
FELLVAVILSAQTTDEQVNSVTDELFNRYPDAHSLAHAEISEVERIIHPVGGFFHVKARHI  
IEAAQMIEARFDGKLPSPFDQLELPGVGRKTANLVAACHEVPGIIVDTHVLRVLCRLG  
ISPKKDPPLAESIVRAHLAPEKHTHFSYSVNRHGKFTCTARKPACTQNGAPCPLDICPK  
IGITSLKNDAE\*

>SPBIB\_v1\_130043|ID:27162469| protein of unknown function [Uncultured spirochete bib]  
MESEYPESSEEIQEIPDPVAKLARERFKIDHLAPLQRFVIANILDADTENLLPYRQLVL  
FPTGFGKSVCFQLPSLVLEGLTVVYVYPLLALMNDQKRRRLDEAGIPCALFRGGLADEEWRA  
QETA VSSKKARIVIANPEILATSRLRQFLSRCRIAHFVIDEAHCISEWGETFRPTYTLTG  
ESAEKLAPHVMSAFTATAGPDIVSSIEKRLFRGNA YRLVTSEADRPNIHYAVVQTLSPTR  
TLRRLSSCQKPAIFERSRPGTRMKAEFLRSVGFAATRFYHAGLSRAERNEIESWFQKA  
EDAVLVSTNAYGMGVDKKNIRTVIHTGLPDSAEAYIQEAGRGRDGKDSFAVLIHNAER  
AGPVGSDLPLQEQRKARFAPYPLIETCRREFLLHLLGETETPVCGACDNCELEMKMARSF  
SSDGSPPRWRDMSIHQRGMPCMPHWRLLQAEGFLETLLLVAANQRRWTMSECIRMLG  
PHGIGRGNVTGGLYGWSRTEREEMVSSLLALSIIIPRRGIWKGSIKLSKEGREFLSVFK  
RFAARSAHHSWRAELEV\*

>SPBIB\_v1\_130044|ID:27162470|pgi| Glucose-6-phosphate isomerase [Uncultured spirochete bib]  
MVTYKNLDRCSSFDSLKKIQAIKLSEKLSAQRIASFWRHAAAMSICYAFAPVDDQIIEK  
LQALTDEQELVEKYRLLVEGEIMNTGEKRMVLHHMARGRLGKTVRWEGQDMEAFYSQEKQ  
RFYEFARKVRDGSIRSSVGTQFAQVQVQIGIGSDLGPRACIALSRWAVSHKRARLAPWF  
ISNVDPDDADSVLSHIDLESFLVLSKSGTTQETLANETLVRERLRASGLNPDLHMVAV  
TSKTSPLAGNPHYLD SFYIDDFIGGRYSTSSAVGGVIISLAYGPETFEFLQGAHEADKL  
AFEPSLRHNPVLM DAMIGVYERNVLGWPCTAILPYAEPLSRFPAHLQQLDMESNGKS VSR  
TGEPLSYSTGPVVFGEPTNGQHSFYQLLHQGTDIVPLQFIGFLQNQISPD MHSEGSTSR  
QKLLANLVAQMLAFAIGKSDSDPNKMFPGNRPSTLIIGDELGPRQLGALFSHFENKVMFQ  
GFAWNVNSFDQEGVQLGKVLAKKALGAISKGESTFDARLDALISAALHTSLKAQMOPDTA  
GKE\*

>SPBIB\_v1\_130045|ID:27162471|murG| UDP-N-acetylglucosamine--N-acetylmuramyl-(pentapeptide)  
pyrophosphoryl-undecaprenol N-acetylglucosamine transferase [Uncultured spirochete bib]  
MMSAEIAAQPGETQHAATQAGANAQPCIVFTGGGTGGHIYPGLAVIDELRRLGFTGRIAW  
IGSEKELDRSIVASHGIEYFAIPSGKFRREISFQNLTDLGRIVAGYFRAKSVLKMLRPAL  
LFSKGGYVSVPPCRAATALGIPVFTHESDASPLATRLNSAHAERILTSWEDTARCFPQS  
LRSRIIRTGNPTRPDLFEGDKARGLKLLGFSDDRPIFLVGGGSGAKEVNRLVLSLRL  
CPTVQIVHQTGQAHYEDVLHAIPDDPAIRAA YRPLAYIGKEIADIYAASDIVAGRAGAGT  
VWEAASLGKPMILPLSGTGTRGDQVENAALASKAGAAIVLEGDKATPEAFVA AVQSFLN  
PEAYSAALNACRKLAVPHDFADPNLQSLDVANSINNAGSQYATEFIARLILARIGWR  
ETQ\*

>SPBIB\_v1\_130046|ID:27162472| putative Colicin V production protein [Uncultured spirochete bib]  
MSTMDWVFS AVVVILAARCFVRGVFHEVLSVASVAVGFLAGLLSNTVIVQVLPKVGANS  
LPYQAQYIIAFVLCFIAGFIIMKIIERMIREGLEASSLDIFDRVLGLALGIIEGFIIVGL  
FIVILQIQPFDTKALLAGSLYAKLLGPIEPALGGSITPLLKNGDLPGVIQNLKKGK\*

>SPBIB\_v1\_130047|ID:27162473| putative DNA polymerase III domain-containing protein [Uncultured spirochete bib]  
VFENLLFQDKAKEQLLAMIASGTVPPALLFAGAEGSGKLTAALEFARVLSCEKEALWNCE  
CAQCAHHRSLTHPDL LFGPRSFPQEPSAAADYFLRTPNATSYYTFVRAVRKLLKRFDPA  
LWSGEEARLSKAASSIEAIEEQLDISSMLASGHTQKLGDTANRIVETALSLEPLVPDGI  
PVFMVRNMAAWASLTPAGKRKTIILQNADTANESARNAMLKILEPPESVRFVLTASRA  
TVIATILSRSLISFDARTSEQAQQIVSRLFR TQEKVEDVSEFFRKKSPFPDRAESAAA  
LFVGALLADAMRGDEAISGELASALVSKARESRSVLDVLRVSEETGGFGLKNAKFADA  
PSVFLRAVARQLARISSDASSAALVMLVDRLSSKLRDVA VQNRTYNRSPELLLEAFANI  
FGVSHESV\*

>SPBIB\_v1\_130048|ID:27162474| PAS/PAC sensor signal transduction histidine kinase [Uncultured spirochete bib]  
MKA VYENALRRIDRIPPEGLKQIINLSAENSIYE AALNSTLD AIIVC DLEHKPLFINRT  
AEKILKLP SWTGEFFIWEQLKDDEIVGFFRKTLLADENILNREISLNRPGGTRVLSISIS  
ALLSNGRISGNLVHMEDITEKRRREAQLRRAESLAALTTLAAGVAHEIKNPLASIRIQLG



IIRRIEKNCKKTESIFHNISLVEQEIDRLNAIVVDFLFAVRPMDITLIHDEVAE  
VAELMSKEAESQIRVITKFDADLPNVMIDRKYKQALLNIVKNAIAAMPEGGTLTISVS  
VRNDELLIAVSDTGIGIPEELLAKIFEPYFTTKESGTGLGLTITFKIIKEHNGEITVESS  
PGIGSTFTIHLPIQPPEQKSLPPWEDGVKIDGSHTED\*

>SPBIB\_v1\_130049|ID:27162475|atoC| fused response regulator of ato operon, in two-component system with AtoS:  
response regulator ; sigma54 interaction protein [Uncultured spirochete bib]

MRATLLVVDDETNIQREGLAQLFSMEGYDVRTAKDGLEAKTIVDREDIDIITDYKMGRMS  
GLDLLQYVSTHPGIPVILTAHGSVDKAVEAMRQGAFFVAKPPNTDHLVNLVRRALLET  
RELYRTNIELKAEVESQRARSYIIGQAPSIKRIFDLIRKVAPTKASVLITGESGVGKELV  
ADAIHNLSPRKDKPFIVHCAALAESLLESELFHEKGAFTGAAARKRGRFEMADGGTFL  
LDEIGEINQNVQIKILRVLQERKFERVGGEEETIEVDVRLIAATNRDLKKEIAEGRFREDL  
YYRLNVVNIHVPLRERREDIPLLAFLKEFSEENGKQIEGFDPKARQALYTYDWPNGV  
RELRCVESA VVMASGKLITIDDLPPGPRSSGQTRNICIPALSSMEDAERILIAETLALV  
GGNKSAAEILKIGRKTLYQKIEQYIGIGSQEAPASSASGE\*

>SPBIB\_v1\_130050|ID:27162476|whiG| RNA polymerase sigma factor WhiG [Uncultured spirochete bib]

MDYASLEENRLWELYRRTADIRDELVLRVYCLVVKYVAGKVSVTLPMSVEYRDLVGYGN  
FGLLDAIEKFDPKKHVKFKTYAVTRIRGAIYDHLRELDWVPRSVRRKTKQIERIAKLES  
HLGRPATDEEIAAEMGIERKELMKIMAKVASSILSLQEIWPMGAESEGGTIGDTLES  
SANPDVTLEREEIRRVIVEAIQELPDKEKKVLVLYYYENLTLREIGRILEVTESRVSQLH  
TKAILRLRAKLSNRRKGIL\*

>SPBIB\_v1\_130051|ID:27162477|hslU| molecular chaperone and ATPase component of HslUV protease [Uncultured  
spirochete bib]

MAETDTLTPHRIVEELDRYIVGQKKAKKAVAIALRNRIRRQRLPEEIREEIAPKNILMIG  
PTGVGKTEIARRLAKLSGAPFIKVEATKFTVEVGYVGRDVESMVRDLMASAVSMVKEEMET  
QVAEEAKRRAEDRLLLEILLPGIASSDEPVGESQATVIVPSSGTETREKFRLLREGKLD  
REIEITVPAQGPQIELFAGTQFEEMNIALGGLQNLFGGKKKKKTTTVAEALPLLEAEERE  
RLVDQEKIVQEARRRTQESGIIFVDEMDKIANREGKGASGIDVSREGVQRDLLPIVEGTT  
VNTKWGPVDTTHILFIGAGAFNVAKPQDLPELQGRFPPIRVELDALTGEDFVRILTEPKN  
ALVTQYTQLLGTEDVTLEFTEDAIARIAEIAAANRQSENIGARRLQTVMERLLEDVSEF  
ADKYAGTKVTIDKAYVDEHFKDYVQQQDLSKYIL\*

>SPBIB\_v1\_130052|ID:27162478|hslV| peptidase component of the HslUV protease [Uncultured spirochete bib]

MEIHATTVLA VRKDGHVAMAGDGQVTMNNVTLKSNARKIRTIYNGKVLGCFAGATADAFT  
LFEHFEAKVQEYGGDLTRASVELAKDWRDTRILRKLEAMLLVADQTKMFLSGTGDVVEP  
SEDAIAIGSGGTYYAAAIAYLDASRRVEEAAGAQQVSDLTSIPGYFSAREIAQKSLEIA  
SSICIFTNDRIVVEEI\*

>SPBIB\_v1\_130053|ID:27162479|xerC| Tyrosine recombinase XerC [Uncultured spirochete bib]

MDARLVDYLEYLEAVRGLSPKTVEVYRRDLAQYEVFLDGNVDAADATDIRAFAGSLVMD  
KRAPASVNRALS AVRGFYKYRVRFHQNEADPAREVENVPAGRPLPSFLFEEETKTL DLSL  
DGNAFRDVRDRALLEVLYSTGSRVSEVCGMELPRLNLSAGSVRVKKGKSKERLVFLCETA  
RAALKRYLPYRAALMMRRGIEEHDRFLVNAKGLPLGPRGAEKIVERRRVQAGIKKHLTPH  
TFRHSFATHLVAAGADMRVVQEMLGHSSISTTQVYAHVDMERLRRVYEQAHPHGSKGK\*

>SPBIB\_v1\_130054|ID:27162480|topA| DNA topoisomerase 1 [Uncultured spirochete bib]

MAASKKEMAGVSAKPAKQKTLVIVESPAKARTIEKYLGTHYRVLASNGQVIDLPKSRMAV  
DVEHDFEPEYITVRGKAAKLKELTDEAKRSTAILASDPDREGEAIA YQIGKYLKEKTKD  
TPIRRVTFNEITRPAVQEAMAQPRDIHMSLVEAQKARRVIDRLVGYTSLPLWKKVKSGL  
SAGRVQSVALKLICDREQEVEFSPIEYWTIDAHLRAHQHLVRAELALFDGEKPSIRNES  
QANSIIAALS GKP AVVTDIQYTDRSIKPKPPFTSKLQQTAANRLGFTSTKTMKVAQQLY  
EGIDMGHQRLGLITYMRTDSTRISESALRETHEWLAQYFPAQTPDSPIRYSVSNAAQDAH  
EAI RPT RVDITPDEAARYIKGDHLKLYTLIWERFVASQMKPAIRTYTADIQVGEGLFRA  
SASSFLEEGFYK VIRLGASKEERTSHQLPLEKGQTLVAEKIQGLQHFTQGPSRYTDATIV  
RALEELGIGRPSTYAPTITLIERYYVQRDKRQLVPTALGKIINEILSKNFPEVINTSFT  
ARMESMLDKVEEQKVDWVSELKKFYFPLKDKVADVMHALEDMHGTLDEATNETCPKCGKP  
LVKKLGRYGYFLSCSGFPECTFTKSVPLAKCPKCGGDIVPRVSTKGRKRFYGC SNYPEC  
DFMTLYKPTNATCPKCGWFLVEKYDKKKGMHKACINPDCDYLHSSDDGKEGA\*

>SPBIB\_v1\_130055|ID:27162481| DNA protecting protein DprA (modular protein) [Uncultured spirochete bib]  
MKAACAELRVNLHGGISKMAHRKPRVEMRSSLVHAELERIAENIPLLD AVELPLKLALHR  
LHFLSWQERLLILENIHCKEDFLSLGLAEIESFLYRSIRAREPDMARIWEQAERDAEQLV  
RMGAKFVCVTDKEYPPLLREIHRAPFGLFVRGDSRCLGLQAVTMVGTMRPTWAGVRAAVH  
LAREAADAGLCVVSGLARGIDAAHRGALQSAGKATIAVLPCGLDRVYPPSNRPLAAGII  
AAGGCLVTEYPPGVSLDRYRFPERNRILAGFSRLTLVIEAPEHSGALITAEFALNEGRDV  
AVAAECSSSRNAGADALSKEGACQVRSAGAEIMAIMSGSGAWDWANGRSIIIGRD\*

>SPBIB\_v1\_130056|ID:27162482|xerD| site-specific tyrosine recombinase [Uncultured spirochete bib]  
VSILVRRFQAYLLSTRRRSILTADVYIREIEMLETFLLYKGYKTPLDASGEDLLTYLVYRS  
QSGLRQTTMARIVASISFYRFCLNEKFRTDDPSIQIRTPRQDRNLPDVLAPESVEYVLD  
SIDISTPNGLRDRALFELIYSCGLRISEAAGLTFQQLYLEEKLLRVLGKRHKERLVPFGD  
EALYWLKKYLAEARPLLEKNGKSDVFVFNQEGRGISRKGIWKRFQIRAKSGIKAKVHTF  
RHSFATHLLAGGADLRTVQELLGHTDIATTQIYTHIDEASLGMYPHKEYFPRK\*

>SPBIB\_v1\_130057|ID:27162483|ftsZ| GTP-binding tubulin-like cell division protein [Uncultured spirochete bib]  
MAIELVDDNGIGSPTVIKVIKVTGGGGSNAINRMIMAGLKNVQFIAVNTDLQDLGRSKAEI  
RLGIGSKITKGLGAGGKPEIGEKAAVEDRDKIEQALRGADMVFTAGLGGGTGTGSAPII  
AQTARDLGALTVAVVTKPFTFEGRIVNRIAEEGFSKLKQAADTVIVIPNQNLKIVDKKT  
PLKEAFRIADEVLRQGVQGISDLITLAGDINIDFADVRTVMMEGQGDAIMGIGVNGENRA  
QDAAEKAVNNPLDDARIEGARNILVNVTCGEDFSLTEYQDVIDLITSKAAEDAHIIAGV  
VSDSSLKDEVVTVIATGFGAARQKFSKTPSKSGISMPLGSARPSEFLGPNEWPLREDR  
PGQDRDRPAADRDRPAPKENFGKISFDPESDNDELDIPTALRNKRLMSEDFGRR\*

>SPBIB\_v1\_130058|ID:27162484|ftsA| Cell division protein FtsA [Uncultured spirochete bib]  
LIFNQALWCIKQRRPSLADTSIVALDIGTSVTKAIVGAFDENGFEFIIIGITALSNGLRR  
GVVLNIEGTLNSITSALDAELMSGADIRAVSLALSGANVESFNTNGQVAITGRGREITQ  
EDIVRVHEAARAVSISMDREILHVIPRSYTVDEQKGVNPLHMTGVRLECGVHIITGSVS  
TVQNMFKCVTRAGYRVEQSYLGILGSARCVLTDDELDLGLLIDIGGGTTDFMVFADSEP  
VFTSAIPAGGSQITGDISIMLSIPVDAERLKKESGASWADAIDPEETVIVPGFGAREPV  
ELERRKLVSIQPRVEEIFEMVNERLVKNGLKEYIKAGVVLTTGGSALLPHIDDCARAVFG  
VPVRIGTPLAIQGLDAEYRSPAFSAVVGVALLEAERTGAVSESSGRKKVRKKGKQGSFSLF  
KWIKDRFF\*

>SPBIB\_v1\_130059|ID:27162485| protein of unknown function [Uncultured spirochete bib]  
MTEIEMRERQLAEKQTTQTERTPTRQPQAKQPQAKQPQASQSQNERSLLSVSDTYSVNII  
HSTTRRETSMPGTAASKGIANKLAAEPARGASGRAAFPAGRVAPEPGPVAPASGRISFPS  
GRVAPASVKLTESADRLSALTRAKKAKKPSGLRILAAALALFCVLAASVVALPRLTKIE  
SIRISGLETLTENAIVSAIGAIGDESLLTLNLKEIKARIEQNPRVAQARVFRMLPSALGV  
DVRERSAVAVIMISSDQGSKLALIDGEGTAFALVEAEDSKSPDLPVISGVHFEQFQPGQR  
LPDMLGPLFADLQKIRNESPELLAFSEIRIVRISEYSAELLMYPVHMKTAVRMPLRLSA  
DALRNSLVVLDILRSRGYGNQPSEIDFQSGTVVYQTKEAVSG\*

>SPBIB\_v1\_130060|ID:27162486| putative cell division protein FtsW [Uncultured spirochete bib]  
MQKESRTDRQDLQQRQTDWQMIAAIIVLSMIGLFALWSGSIGFAIRNGGPNIIIGKQAIL  
YAVSLVFMALVAVLPVRFRLRGVLPFVVAIGIVGLALPVFSPLGVMINNARRWIRIGSFTL  
QPSELWKPVLVLYLASFLEKRKEHIVESGMATFPALVLVGLSAFLIYLQQDFSTSILVVA  
IALAMLYLAGTPLVFIASLGGFSLLYGGLMIFSSQYRIERLVGFLMPDHHHTVNYQMYS  
ALRAIRAGGLWGKGIGLGLSKISSIPEVQSDFIFAAFVEEAGFIGVTVVLALWAFIMVRA  
GKGLARTDYFSKLAGFGLITLSSQMLLNLA VVTGIVPTTGLALPFFSSGGSAALMTSIT  
CGVLINLSGSHERIAHSEMSFVMKGAHD\*

>SPBIB\_v1\_130061|ID:27162487|mraY| phospho-N-acetylmuramoyl-pentapeptide transferase [Uncultured spirochete bib]  
MLREIFLPLVKYFTPFNIFRYLTFRSAYAAVTALVICYLIGPWMIEKLRVLKFGQSIRD  
GPQTHLAKTGTPTMGGILILAVVVS VVLWIDVKSGYSWIALLSLVGFGLIGAADDLLKI  
KKHTSDGLSPIQKLALQFVVS GAAAYAIYRITGPTATKLYVPFFKVHVIDLGAFWLPIAM  
IYVTAWSNAVNITDGLDGLASGLVIFAILAFSILTYITGRADWSQYLGIPYIKQASELTV  
FNFALLGACVGFLLWFNAHPAEVFMGDAGSLSLGGVLGVLVSLMVKKELLLL VIGGVFVMEI  
GSVMLQVLYFKMTKGKRLFRMAPLHHHFELLGLKETKVVVRFWILGGIFALIALSTLKIQ

\*

>SPBIB\_v1\_130062|ID:27162488| UDP-N-acetylmuramoyl-tripeptide--D-alanyl-D-alanine ligase [Uncultured spirochete bib]

MANPDLPTAELPVLFRAGELAGLIGGACKGFLDAPIRSVVADSRAAKLDSMFVALKGERT  
DGHLYIKQAIENGARVVMMAEFSSRRDMALDAIHASNMGEKICLILVDSTMKGIQQAACEYR  
RRNSLLRIGVTGSSGKTTTKECIAAILSACYPPESVAMSPGNLNSDIGLALALFDLRPQH  
TIGVFEMGINRKGEMDELASMYEPDIAVITNIGTAHIGMFGSRDEIAKEKKGKIFSHFDGH  
QKALLWEDDQYRQFLASLVRGTVHYYGLKSTEGIEKIENLGLKGWRIGWKQQTIEFGFPG  
QHNLLNACAALSANMLELDPAQASRGLSSVKPLFGRSEIREGRITVLQDCYNANPDSIA  
AAIEFFSALPSDNRKILVLGSMLELGEESERAHENVGLMAGNSGAEAIPLFGQEMAAAEA  
ALKGRSFKGMLMLTDSMNELIEAVSGFVQPGDLLLVKGSRGMALERLTKALEEKGFLLSPS  
GKASGGSHAS\*

>SPBIB\_v1\_130063|ID:27162489| putative cell division protein FtsL [Uncultured spirochete bib]  
MNARRFWILAIITCLFIGLLVFQTSRYAALKSNVISLQRMEMDLIKTGKELDANIAKLVS  
LERIEKAALKNGMQIAAPEQRIIVTDIQAGNKQEASTNGKP\*

>SPBIB\_v1\_130064|ID:27162490|rsmH| Ribosomal RNA small subunit methyltransferase H [Uncultured spirochete bib]

MPEQIEGKAAELFLHVPVMLEEVQGLAAKIQPLSLYIDCTLGAGGHAEALLSMYPDLRCV  
GIDADPDACERAFGRLSRFAERLSIINAYYDDALADLCVCSSAGKVLGANLSDLCNSSHA  
PRASFILFDLGLSSYQLGASGRGFSYSADEPLDMRFSPDAPASAEELIHLSEAKLADLI  
YAYGEERYSRRIAHAIVAARKKESIHSAAARLASIIADAVPAQYRHGRIHPATRTRFQALRI  
AVNDELGRIERALVSALELLAPGGICAVISFHSLEDRIVKHFFAEKAKTGRFSLEWKKPR  
GPSLEEIKANPPSRSAKFRAIRAVAMRSEQAQQGASA\*

>SPBIB\_v1\_130065|ID:27162491|mraZ| Protein MraZ [Uncultured spirochete bib]

MKLLTGEFKNMLDEKGRSLPARLRSDDLPSLVLTQGVDTCLWLFAPPEWEELSQRILAS  
TSLFQARSRLIQRRIIAPAQEVVDKLGRISSIPQSLRDWAGLSKECIIIGISRYVEIWDS  
QRYQAYLAENQSEFLSAAEELGGLTLS\*

>SPBIB\_v1\_140001|ID:27162492| putative PP-loop domain protein [Uncultured spirochete bib]  
MNAILAGKREPWFERLLLQMAAITQYSMIGREDGILVGLSGGKDSLALLALLAVWNRGV  
RPLRACYVENRQFPQNKGSLEALGTFCALLRVPFSIREIETDVRGCFPCSHARRKALAE  
EAVERGCTRIAIGHTRTDLVQTAILNLAHHGTLQGLLPIRQYFENAFVVRPLIFLDETD  
IWRIVRRLDLPVQKSSCPLADNSERAKAAAILKALESMPGAAANIARAANSALNLV\*

>SPBIB\_v1\_140002|ID:27162493| conserved protein of unknown function [Uncultured spirochete bib]

MSEISLLNALVHHFDVVVRDPVWGDVHMDAPLHALFQSKSFMVLDRIQLGPVALVYPGA  
THTRKAHSLGVYYIARRMALALVEKGEIDFVSKTGLRSFLVAALCHDIGHFPYAHSLKDL  
PLSRHEALAGEMIVSEPLRQYVSSCGADPEQTAAIIDPDRSAGESRETLFRSFLSGVLD  
PDKIDYLTRDAFYCGVPYGIQDADYIMRRLVHDDRLAIDLKGEISIEALIFAKYQMYRA  
VYWHPTVRAATAMVRKAVYLGAEGLVLPNSLYGLDDTSFGRLMNHSHKFAFPKLAREAE  
KHIFRLADEHAFDEENPVHADLLDISKRIDAESTLAQAAELPETDVVIDIPERIKLETDL  
MVKIDDHFEAFDQRSTLFPQETVAKVAGALRTIRVYLRPQSNPDLKIKIQLVQALLG\*

>SPBIB\_v1\_140003|ID:27162494| Methyltransferase [Uncultured spirochete bib]

VLTSRLDFSDYEHVDFVSGYIFHAADGFLGHLLEEVPAVTRVDGELVSSWNKNGKAPFDL  
ASHPVFWTRNVWVEPFLLEFGSISEAARTLKAIQRNWSSVPVRFARRTVLISEQLPHIPT  
KPRRFPELPSAPMGAFLLDEHLILGSAKCSNPFPGGAFEFEEKNNDPPSRA YRKLWEA  
LILAGKMPRGERCLDAGASPGGWTWVLASLGAVLSVDRAPLEPRIAQMNPVWEMKHDA  
FTLKPEDIGRVDWLCSDVICYPEALWQWISKWLASGLAKNYICTIKMQGNTYDRATTLKF  
ASVPGSRVVHLWHNKHELTWIKLDAARTQTELSATQQA\*

>SPBIB\_v1\_140004|ID:27162495| UvrD/REP helicase [Uncultured spirochete bib]

MDIDFRSELDPQYAAVTA AEGPVLIAGAGSGKTRVITYRIAYLLARGVPQEAILALTF  
TNKAAKEMVERAHSALTGLALKNLVSTFHSFGAWMLRKEAAVLGYRPNFSIYDEQDRTRA  
IRECAHELGIAAENLDPVRLSQLFSALRSGYGKPGELSQRELELYALYRKTLLKIYNAMDF  
DDLIALPLELLQEHEEVREKYRSRFRYIMIDEFQDTSLLQYEFIQQLSEGNICVVGDDDDQ  
SIYSWRGADYRNIERFETDHPGFVEIKLERNYRSTGSILTAANTVIAHNVRKKEKELWSP  
QGTHGTPISFFEAEDDDAEAEKIEKIRELRFSEHADWENFGILVRTNALADAIEDSLVE

HNIPYRVAGGPSFYQRREIKDIIAYLKAAANPDDVSVLRVNLVPRRGIGRATVEYLSNI  
AKAHSTSLHHAEEAARQAVFAPKESHMOKALAEVFSFFDYLGELRSALLEKILVSRAIR  
TIVEDVGYWQYLLDEHKKNDKAAVWKFRNIELLAASAERWEKDPDTFEKGIFAYLARISL  
TVRDDANEEEGRLSLLTIHAAKGLEFDYVFIIPGCENGILPHARSLEEGGGDIEEERLFY  
VAVTRAKKQLFLSRALHRKKNGSLQETLSPFLSELQNLMMVMADAQKPAVSEEDLKKEF  
FSRLKSRLGA\*

>SPBIB\_v1\_140005|ID:27162496| Small multi-drug export protein [Uncultured spirochete bib]  
MNAPILMTIFFSILPISELRGAIPYAVYQGLPILAAAISIAANICVPLIAFLFLNSIHK  
LLYKFSPYRSFFDRVVERTRKKVHAKVEKYGYWGLLLFVAIPFPVTGAWTGALGAWILGL  
SYKKAFFAIAGGVLVAGVIVSILVALWGAGTQTIFFKTMH\*

>SPBIB\_v1\_140006|ID:27162497| protein of unknown function [Uncultured spirochete bib]  
LYKSLWMLFKNKKAMSGTHIFAAIEMAAAARIGRPWYTA YGIAPLSSEIGKMEKKIVMRI  
GAFIATIARDSLDCLGKAEMC\*

>SPBIB\_v1\_140007|ID:27162498|miaA| tRNA dimethylallyltransferase 1 [Uncultured spirochete bib]  
LTKPLATNCLPVDVAVILAGPTASGKTDLLDSMFGAGVAEWLPRLRDAWSIDLQSVHVLSA  
DSMQAYRFMDIGTAKPDSGLKKRLVHHLIDIKNPDEQYTAGEFVARADALCTELTEQHIL  
PVVSGGTGFYLMNFCGLPSAPPSLPEIRAQVAQELEHAGTAALRAELARADPEIAAKIH  
EHDVYRLTRAVEILRSSGKPPSFFAPQKVPRQGRFVVLGVTRPRDELLELRIHARVEAMM  
KAGLAE EVAQLVARGYSREDPGMQAIGYREFFELSGRPLETISEAIELHTRQYAKRQMTF  
FRALPGIQWIAPEPEQLFRALAEAN\*

>SPBIB\_v1\_140008|ID:27162499|rpoZ| DNA-directed RNA polymerase subunit omega [Uncultured spirochete bib]  
MIMPLEALINYSNGSYELAAAVSMRAYQLAVLQTPVEVEKNNGKVVSMATQEILDKTIGYK  
LLAG\*

>SPBIB\_v1\_140009|ID:27162500| protein of unknown function [Uncultured spirochete bib]  
MSSISSDQRMHIEILGQSFSIKTDDSPEYIQSLVSELKQRYAVISTRMGVADPLRVAILA  
GLFLLDDLKKTQGQKLSGAEARENTSARSTLSELDEEQILAQLDKRLGELGI\*

>SPBIB\_v1\_140010|ID:27162501| protein of unknown function [Uncultured spirochete bib]  
MMLNLEQIRALESRVEKAVVLITKLRQENADLEARLADVLRSAELLKNQKEELERQLAAQ  
TRAANESSRLEGLIARAKEAEEKAANAELKAAEAEERAAAMERKAQAADDEISHYRERA  
LTAERRVAELESKAEEELRTEQERIEQGLMHASKLDSFEDMVLEMSLGAGARSES AVKPE  
AQHIAAPLQDVGQESDEQAASDISEPDSGGGEGEKEEPDDNSSPDLKSRDAPFRGGENELDI  
F\*

>SPBIB\_v1\_140011|ID:27162502|rpIT| 50S ribosomal subunit protein L20 [Uncultured spirochete bib]  
MPRAVDGTRRKDHRKILKHAEGFWGRRHSNYKVAKDAVAKALSDAYKDRRDKKG VFRRL  
WIARINAACRMRDISYSRFIGLYKADV CIDRKMLADIAVRDPAAFDAVVEKAKAALQG\*

>SPBIB\_v1\_140012|ID:27162503|rpmI| 50S ribosomal subunit protein L35 [Uncultured spirochete bib]  
MPKMKTKKAAAKRFTLTASGKVKYKMNLRHILTKKTTKRKRNLKAGFLDVGVPVYQIRK  
KLLPYG\*

>SPBIB\_v1\_140013|ID:27162504|infC| protein chain initiation factor IF-3 [Uncultured spirochete bib]  
LAEKDLRINEQIRVREVRLLIDDKGEQRGIVSTLEALRIAREAGLDLVEVAPQSVPPVCRL  
LNYGKYKFEQEKKVKDAKKRAKVTELKEIRMQP KIAEHDLD FKANHVREFLEDGNKVKVT  
IRFRGRELAHTEIGEEILKRILAKLEGAFVLERPPLMEGRFMSMVLQPKAGAVKKQPEGD  
TVNTASGPEH\*

>SPBIB\_v1\_140014|ID:27162505|fba| Fructose-bisphosphate aldolase [Uncultured spirochete bib]  
MTSYKELGLVNSKELFRKAMEGGYAIPAYNFNNMEQLQAIQACVETKSPVILQVSSGAR  
KYANATMLRYMAKGA VEYSKELGYAIPVHLHDHGDSFELCKDCIENGFSSVMIDGSHLP  
YEENVALTRKVCEFAHAQKDYVTVEGELGVLGVEDDVSAEHSHYTRPEEVVDFVSKTGV  
DSLAI SIGTSHGRAKFRPEQCTRTADGVLIPPLRFDILEEIEKRIPGFPIVLHGSSSV  
VEYVRMIEQYGGKLPDSVGIPEEQLRKAARSAVCKINIDSDGRLAMTAMIRKVLFEHPEE  
FDPRKYLGPAREDELKLYMHKNSEVLGSANRA\*

>SPBIB\_v1\_140015|ID:27162506| exported protein of unknown function [Uncultured spirochete bib]  
MKS YACFRRSAFAALCFILAVAGSLGLLSGCSHPPVSAMLDEAFALVYPDLSARLVREFP  
VPSSAAKTA AKATSPYLSYPVQPGKIESLAQSI AQSWPSGSTSSSAHIFVASPAVAHAFP  
VKLLDEGSTCVSLFSRAEPALPEIAQLAESPSGRTLAIMWDSEWAYRQIGLIAGYRIGIE

RKNGNTEVNAAILFSSGLGRSEADLDAFVEAFRTAMETAGARDSDNGQALLPFNIDHMNL  
PGDKLEQALSALAQIKDKKPSLLVIAAGSRTALEKAQEMKDIELAADLRGLGQGIPTRNL  
FAAIGENNSAIIAIRNAAQLIEKKDVMPPHIVKPALQFSKEAARIDAILKRTAGQ\*

>SPBIB\_v1\_140016|ID:27162507| conserved protein of unknown function [Uncultured spirochete bib]  
MSTIIFYISKILRPVVASPLFIAIIFSTIALFLLRAKSRLQRVIKALALVLLLVAVISK  
PFVATGLARLWEYPRSDLDDCLSKGPYAAIVVLGGSLDPVASKPGAIEGNDSFERLVAAA  
ELYRKGAAPIVIASGGTGSLSYADRREAPFMAEFLELMGVRRNAVVEDKSRNTFENAVY  
SKAYLEKREGSGNAKPGRILVTSAWHQRRASAIFRKAGIDFYPPYSVDSLVAFMLPSDL  
FPDAWALTRSTRILIEMAGFVAYRIMGRL\*

>SPBIB\_v1\_140017|ID:27162508| conserved protein of unknown function [Uncultured spirochete bib]  
MRLVTLVENVVYNTQLSAEHGLSLYIEYGGHRILFDTGQGDRFLKNAEVLGIDISLVDAL  
VLSHGHDHAGGLETFCRANKNARIYIKAGFFEPKFNKDRKFIGIHYNESLFAGRLLITVK  
SRTEIFPGLYIMTDIPITNAWDTHFEDLYVQGEHGLVLDQFNDEQFLVLKENGASVITG  
CAHRGISNIVRAAKSAFDLPVRLVLGGFHLSKSSDDMADRLLIQELSTFDIEKLGCCCHTG  
VEKYARIKSFFGERAFYNCTGTDYAGTDYKGAEYKSAAPLQ\*

>SPBIB\_v1\_140018|ID:27162509| putative Uncharacterized deoxyribonuclease YcfH [Uncultured spirochete bib]  
MSAVFTDSHAHLEIVSQRLGKEVLEEVLAA YGRAFGAGARAE EEP AIVLDVGT EPGDLEM  
RRALVRQCASQRSAQFVKFSAGVWPGLEALADPDCAMSLLERDIERGVDAVGECEGLDYH  
MAASPQAQKVLFSAQIELALRHRLPLVVHSREAFEDTHSLVAPAASRIPVIIHCFGYGPE  
EARAFLESGCFISFAGNMTYPKASRLREALALVPPDRLLLETDAPYMNVPVLRGKASSPL  
DIARTYALASELLHIDIEELRKRITKLNLRILGNSQ\*

>SPBIB\_v1\_140019|ID:27162510|clpB| protein disaggregation chaperone [Uncultured spirochete bib]  
MNYEQFTLKAQEALRDAAIAQKNDHGSIEPEHLLSALLEQEGGVVSSILERLGADRGR  
DRGLQDLLSHLPKAYGEATQVYFSPALQKVVAKAEGESKAMKDEYVASEHLFLAMLSVES  
RAASLLKSAGITREGVLSVLKSIRGTQSASDENAEKYQVLEKYTRDLTALARSGKLDPV  
IGRDEEIRRMQVLSRRTKNNPVLIGEPGVGKTAIVEGLAQRIISGDVPDSLKDKKLLAL  
DLGSLVAGSKFRGEFEERLKAVISEIVKSEGKIILFIDELHTLVGAGAAEGAMDASNLLK  
PALARGELRAIGATTLDEYRKHIEKDAALERRFPVFCAPPSVEDTIAILRGLKERYEVH  
HGVRRDDALIAAAVLSDRYITSRFLPKAIDL VDEAASRLKMEIESQPTELDQIQRKL  
QLRMEADALKKETDPASVERRGKLEKEIADLSEKRDAMNARWQDEKRLIEEIRQLKQRIE  
EYKVEVDQLVRDGQLAKASEIKYGKLVDTQRKLEELSKKVQEEKDKPRLREEVSDEDIA  
RVVSLWTGIPVSKMLSSEMQKYVELESQAKRVIGQERALRAVADAIRNRAGLSDP  
LGSFLFLGPTGVGKTELAKALAEFLFNDERALTRIDMSEYMEKHSVSRLIGAPPGYVGYE  
EGGQLTEAVRRRPYSVVLDFEVEKAHPEVFNVLQMLDDGRLTDGQGRVVDVFRNAIIMT  
SNIGSEFILEMKSMDEIRSRIDELKTYFKPEFLNRIDEVVVFDRLDET MIRKITDLRLA  
ELAQLAARSIALEVHEAAKDYIAKEGFDRQFGARPLKRAIQNLL ENPIAKKLLAGEILE  
GDTVTVSLAGRELAISTKRPA\*

>SPBIB\_v1\_140020|ID:27162511| conserved protein of unknown function [Uncultured spirochete bib]  
MSQKEKEQELDQLLPAIPEDFRAVIMYGMTKEEALAIMRAVKS V G P S M Q E V A F A M S T E T N  
IQWPLGQLVAELSEEHRMMKEYRAAHGKESIVS\*

>SPBIB\_v1\_140021|ID:27162512| protein of unknown function [Uncultured spirochete bib]  
MHFHFCPNPACAYHQHAPKERWFVAAGFYVTKTFGKVQRFCQACXX

>SPBIB\_v1\_150001|ID:27162513|argR| Arginine repressor [Uncultured spirochete bib]  
MKERAERLKTIKAIKENRVDSQEKLLQLLEDHGYSVTQATLSRDLKFLKVGKLS DGRSG  
YYYSIPSEERRESERHYIQDFLRGYVSIDWNQSLVVVRTFSGHSDSVALAIDNMGFDEV  
IGTISGRDNVVFIALKQGIGSDEFIRSLKAKIPDFEET\*

>SPBIB\_v1\_150002|ID:27162514| putative L-lysine 2,3-aminomutase [Uncultured spirochete bib]  
MHDVIAQGGPLPFRATRFWFLANEPENCKKNENGVPVDPILAQAIPSPSEALVTSWELR  
DPLGESSHTIFEHAVRQYHSRVLVRATGQCFLFCRHC FRRSLLPSERSFMDSKAIKALAA  
YLAVHQEVREVLISGGDPLTAPDASLASLFEAVRSVPRPILIRLCTRTPVVL PQR L T S D L  
IALLSKMRPLQMVLHINHPKELSQEFMEKAELLRAGIPLHSQTVLLRGINDAASVLIEL  
FSALNRAGIHPYYLFGQDLAAGTAHFRVPLSKGLALYENLRKELSGLELPRYAVDAPGGG  
GKIYLPEDIAERRADLWILRAPDGS LHEYPEEG\*

>SPBIB\_v1\_150003|ID:27162515|guaA| GMP synthase [glutamine-hydrolyzing] [Uncultured spirochete bib]

MDKIVILDFGSQYTLIGRRIRELGVYSEIVPGERKPDSSALLEGCKGIVLSGSPYSAWQE  
GSPAPDLAMLGTGLPILAICYGIQWLTMHAGGVVERCETREYGSMRVRFLPAVQDSGRAA  
TLLEGLPDSFLSWMSHGDSIVRPGEEDVVGISESGVPAILAHRARPWFGLQFHPEVSHC  
EHGMDILANFVFRICGAERGWSMEAYLEQEARLLRERVGKEPVLLISGGVDSTVAGAF  
LKSLLDPDQVYLLYIDTGLMRKAENEEVMHNLSRLGARHLEAVDAEAQFLSALKGVADPET  
KRHIIGDMFVKVQQDAVVRGIPDAFLAQGTLYTDLIESGKGVGNKAQVIKSHHNVRSP  
IEKKRAEGRVIEPLDRLYKDEVRLGRVLGLPEEIVGRHPFPGLGVRILGDITKEKCD  
ILREADSIFIAELRKRGLYDRIWQAFVLLSVRSVGVAGDERAYKYVVALRAIQSEDGMT  
AQPFAFEPKDLFEISAAITNRVQQIGRVVYDISSKPPATIEWE\*

>SPBIB\_v1\_150004|ID:27162516|purA| Adenylosuccinate synthetase [Uncultured spirochete bib]  
MNVVVIIGAQWGDEGKGIKIVDFLASDAQIVVRFSSGGANAGHTIVLGGEKYALHLVPSGILY  
PDKIVILGSGMVIDPEALFQELAGLEQKIDWKGRVFISDRAHIVFPRYRELDKQAEAGR  
ARPIGTTGRGIGIAYSLKASRDGIRLADIDDERLVNLPGDDRAWLSIWKERLLPLRIDL  
AAYLQRHRNSWRLFEGAQGALLDIDTGTYPFVSSGMSCAAGAAAQGGIGPRHIDRVLGVF  
KAYTTRVGNPFPTEFADDSPLSLSQYIRNVGNEYGTTTGRPRRCGYLDLVALRYACTVN  
SIDRLVLTHIDVYDGLLEEFACVGYKIGDKVIEDFPASVRDLTGARPVLRKFSGWKTPLG  
KCRTYEELPLRAREYIEFIEEFTETSISIISVGS DRKQ TIVRESPWIK\*

>SPBIB\_v1\_150005|ID:27162517| conserved protein of unknown function [Uncultured spirochete bib]  
MKHSPSIALVLNAHLPFVRKPQYAQFYEERWLFVISETYLPLLRMFRKLELEGVPPFKLG  
MVFSPDLLSMLSDPLLCDRYVAYLDSQIELALKEKRRLGSDAAFAPLADMYEMYRRSRD  
EFENLHGRNIIRAFDYYSKKG YIELMTTAATHAFLPLYS DIPEVINAQIETAI IHRSEF  
GKNPAGFWLPQLGWYKGLAPRLRAYNINYSIVTTKGALLGSPLPFYGSFSPVMTPAGLAA  
FIRDAGATKAVWSETEGYPHPVYRDFYRDIGYDLDTGYLAPHLSGVERGYTGFKYWAVT  
GKTDLKRPYEAASAQAVAHAEYLSSRKVQARAASFWMKDKPPIIVCPYDAELFGHWW  
FEGIQFLEAFFRAASRRDEEAI RLVTLSEYLAENSELPESEPEFSSWAEGGYAEVWLDGR  
NDWVHRHTRKAAERMRELTVRFPNETGLRERILNQAAREVLLSMSSDWALLRSGKAADF  
ASRQIRESIYNFNHIYEMLSAHTVETEWITSLEKRHNIFPHMNYRVFSPKQ\*

>SPBIB\_v1\_150006|ID:27162518| conserved protein of unknown function [Uncultured spirochete bib]  
VPVRILTSGALLSHYSAVDPEKLSLLSDDELRLLAEKMGYVPDELERVFLIEEIIIDAFE  
EDTSEKVFSDHTPGHVEEKLAGHGFIPSQSEEIVIPDHYNETYISAIVRDPLWIFAYWD  
IAASLREKILAEFEKPLLRVSEIADSEKAFHYDVSVSFDDRKYINVPYPKRSYRIDL  
CIAKTQKAKVIARSNVVRMPAQYMDMPSKLPQMTKSLILSGSEDLNLIEPREENSLRIL  
NMDGE\*

>SPBIB\_v1\_150007|ID:27162519|fhs| Formate--tetrahydrofolate ligase [Uncultured spirochete bib]  
MSVQRINPVPQDVDAIQSANIQPISEIAARYSLDEKYLEHYGVDKAKIHLEFLADPPKQA  
KRAKYIDVTAITPTPLGEGKTTTTIGLAQGLGYIGKKSIA TIRQPSMGPTFGIKGGAAGG  
GYSQIVPMTDFNLHLTGDIHAVSAAHNLC AALDARMYHESRWADSYFEKLGKLNIDP  
YAVLWRRVVDMMNDRTLRSIIIGMGLENGPLRETGFDISVASEVMAVLALATSLDDLKR  
LGRIVVALDKSGNAITTEDIGVAGAMTILMKDALKPNALQTLEEQLAFVHAGPFANIAHG  
NSSIVADLIASQIADYVVTESGFGSDMGFEKFM DIKCRASGLMPDAVVLVATVRALKMHG  
GGPKVTPGKPLASSYTQENLELLQKGLCNLQEHIRIIRTYGLPVVVSINAFPTDTEA EHA  
LIKDAALKAGAFDAVISKSWALGGEGAADLAMA VDKAASMPHEPKLLYPLDMSLKDKIEI  
IARQIYGAGSIVYTPEANA ALEKYTALGYGNFPICMAKTQYSLSHDPALKGAPKGFEPV  
REVRLSAGAGFIVPITGEITTMPGLPSKPAYIGMDIDTATGRITGLS\*

>SPBIB\_v1\_150008|ID:27162520|appC| Oligopeptide transport system permease protein AppC [Uncultured spirochete bib]

MIARRSQKIVFSLAVLYLLMLVAAAIAAPLLSPYSPSEQYLDRRFHAPSLDNLLGTDNLG  
RDILTRLLYGARSALIVGLVAVSIAFSLGGLVGLLAGMGPKHIDSVLMLLMDSLLSFPTI  
LLAITVVSFMGYGLVQVMVALGVISSPVFARLVRAETLSVKTEGYVEAARALGTPPAKIV  
VKHIIPNIMGKVIVQCSLTFAQAVVIESSLSYLGVTQPPAASWGLMLKDARNYLAQAPW  
MAMYPLCLALTVLA FNIIIGDSLSEFNPRLG\*

>SPBIB\_v1\_150009|ID:27162521| Dipeptide-binding ABC transporter, periplasmic substrate-binding component [Uncultured spirochete bib]

MKKVPRIASLCLFAFSAASLVVAQTKGTLVFGLSGNPDTLDPQKTAGTLTFQVVKSFYD

TLVEPNTDGTIVPALAESWTVSPDGLIWTFLKRRNVVFHNGQPFTSKDVSRASLERIKDEA  
TASPKRSEFAAIKEIRTPDAATVVIVLSQPYAPLLASLASGWGAILPSGLIASGHNFGAE  
PVG TGPFKFEKWIRDNKITMVRNDTYWMKGLPKLAKVEFQIIPERAVQVQGLSAGVIDAV  
EFIDPEDLPLFSSNPKVSIIKELTSLIMVMAMNCSREPLNDRVRQAVNYAIDKQVVDV  
AYGGGKVGSTFLDTGNAYYTDFSYLYPYNPKARQLLKAAGVDTREFTITVPQNYPLHVK  
AAELIQQMLEKVG MHV KLQLVDWSTWLSVYNGGNYDFTVIGHTGKLDPDGTLAGYGTGK  
YVKWINATAAQKIKEAAISDFAARKKLYTEVLEIMAKEVPFVYLGTSYRYVGT RSNVVD  
FRMTPNLDTFDFRWTELK\*

>SPBIB\_v1\_150010|ID:27162522| D-ala-D-ala transporter subunit ; ATP-binding component of ABC superfamily  
(fragment) [Uncultured spirochete bib]

MQCRNIVKIHRGRGVEGERHGFRAVDNVSIEIERGRIFGLVGESGCGKTTLARAILYLDP  
PTSGSVLFDGVELGSLKPPMLRKYRKRMQIIFQDPHSALDPRMTVYDSLSEGLINIGVDK  
ARRDKKIRELLDRVGISSTYSRRFPHEFSTGQRQRIVARALTMDPEFLILDEPVS NLDV  
SIQAQIINLLMDLKKDLNLT YLFISHDLNLSYMCDDVAVVMFGGRIVEQAPTEALLAHPG  
HPYTRLLASIPGGAGR\*

>SPBIB\_v1\_150011|ID:27162523|dppD| dipeptide transporter ; ATP-binding component of ABC superfamily  
[Uncultured spirochete bib]

MDESAPLLKIENLNVRFSHRGKSVHALRGIDISFYKDEIHGLVGESGSGKTVTATSIMGL  
LPRPSAEIISGSVFYKGNLLMPEDELRTYRGRAISMVFQEPAYLNPAFKIGGQIEEM  
VMLHMGLSKVA AKARARELLKLVGLGRDGRVLDAYPHELSSGMKQRAMIAIAISCNPDFL  
IADEPTTALDVTLQKQILKIRTLKNIENMGVLFISHDLGVIREIADRISVIYAGKIVES  
AGKESL FNKPMHPYTRLLMLSIPDARHRGRKLATIPGQVLDATSTPEGCLFAPRCPLAEQ  
RCFSLTPELVEHEKGHLAACHFAGKSWNL\*

>SPBIB\_v1\_150012|ID:27162524|gsiC| Glutathione ABC transporter, permease protein GsiC [Uncultured spirochete  
bib]

MDLARFI AKRLLRLVLT VLLISTIVFFVIRVIPGDPALLIAGIDATPSDIAAIRAKLGTD  
RPLSAQYFDLW KVAHLDFGNSMISEEPVTALILQRFPLTLALAVLGMVIGTVIAPIGI  
LSAVKPWSAWDYVGLVMSQLGMAIPSWLGFLLVFAVKIPIFPLFGAETLASLVLP AF  
SLGFARAAILLRHTRASMSEELSKEYIAAKAKGLTDRMIKYKHALKNALLPIITVAGIE  
FGYMLGGAIIEQVFSLPGLGRLFLYAIYQRDFPLIQGGVVFIAIVFSLVNFAADVLYSV  
VNP KIRLE\*

>SPBIB\_v1\_150013|ID:27162525|pcnB| Poly(A) polymerase [Uncultured spirochete bib]  
VRIRYFRNTKGG LQAKARVYDNTEHNIDPSLVDRDASAIVKRLVSHGFTA YIVGGAVRDL  
LLGKRPKDFDIVTDALPNRIRKIFSNSRIIGRRFKLVHIYANHKIFEVSTFRSLSTGTIG  
NEYGTIDEDVQRRDFTINALYDPLTFELDLFGLEDLRANRLKAIIPLEKIFREDPVR  
MIRGVKYAAVNNFSFSFALRFAIHRDAALLKEVSSRLAEFYKIIASGKS AIIIQWLD R  
YKLLQYFLPEVSNLRRSKDFKDTFFQHLES LDALARTPEDASLLNNASAAEIVQTDRRL  
ISPFVAWFVRQRLRDFARREDVPKEPPAFRQA AFADIREFLAPLNLPRVALEEAMEWVLQ  
EDSLMPAPPVPKRRKRSPRRKKSQR AEAHIEISDANLQ\*

>SPBIB\_v1\_150014|ID:27162526| conserved protein of unknown function [Uncultured spirochete bib]

MKKFQASDGKELAYLRYDPKEKPKAVVLIGHGMNDHKERFIPLAEALTPIGISCWIPDLR  
GHGDTDPDVNKGYLADSDGFERVVQDLVELGDYASKEMGGLPLFYFGHSFGALVGMALIA  
VNGKYFDGAILSAPPAQPNPFLDKIGGLIVSIGAAIRGLHAPAKLANQMTFGDYAKTPN  
ARTRFDWLTRDASIVDAYIADPKCNFICTYGFYRDLIHGLRKVY GEGFLESIPPTLPLFL  
FCGSADPVIGMQAGCEKLAQQFRSLGIIDFETKCYEGGRHESINEINRMEVLNDIADWFS  
RHIR\*

>SPBIB\_v1\_150015|ID:27162527| protein of unknown function [Uncultured spirochete bib]

VHIDAYRLADEEEFFQTGGEELLGAPGTL SLIEWSERIAHILPPESQIITITVEENGARL  
IMLEGDWIEALRWGHFTIPACKETSL\*

>SPBIB\_v1\_150016|ID:27162528| putative tRNA threonylcarbamoyladenosine biosynthesis protein Tsab [Uncultured  
spirochete bib]

MTIL AIDTSTPILKIGVYKGLIQATIVQPPLTHAEQIIPAIEETFRKAGIAPANAGLIA  
VAGGPGSFTGLRIGIATAKGLSLALGIPLVLVPTLDIYGF AWREMGGIVVPVIDARKHRI  
YCARYSHGQNMGELMDIEPDQLLPKIDAE EEVHFIGPDADLLESICLERPGWIIHEPDAE

KEVAIAELGLRIFEEKGPADDAARPIYLREPEIGIPLAR\*

>SPBIB\_v1\_150017|ID:27162529| conserved protein of unknown function [Uncultured spirochete bib]  
MAVEIRKVESGKDLRQFIDFPVRLYWDEPNYVPAPRLDEMRTLKDKNPAFEFCEAEYWT  
AWKDSKMAGRIAGIINHRYIEKWGNKYARFGWIDFIDPEVSKSLETTVERWAASKGMKA  
VHGPLGFTDLDRGMLVEGFDQMATLATIYNYPYPKHLEALGYRKDIDWLQYQIFTPKE  
IPEKVQRVTELLAKRSGVHL YEWTDKR VIVQKFGKELFKLIDETYSGLYGTTP LTERQVE  
TYIKQYLG FVEPRFTKILVDEEEHLIGFGISMP SLSEAFYKSRGRLFPFGWYYILNALKH  
PKVLDL YLVSVKPEYQARGVLAII MNAFQRSAL EAGVEYAETNLELEDNVKVQSIWKDYP  
KRQHKNRAYIKEL\*

>SPBIB\_v1\_150018|ID:27162530| conserved protein of unknown function [Uncultured spirochete bib]  
MAEWHEIKYQEIFEGTLTGLKRRREVDPVFSIEDAERQLSHLYILDGNDWLGRGELGDIV  
SQATIAAYELFIQEWKVEIGGEHGG\*

>SPBIB\_v1\_150019|ID:27162531| Cystathionine beta-lyase [Uncultured spirochete bib]  
MLHKSATIRQTDIALNPIDVSYIPHHMNEDALSEHAVSPPIFQTSNFCFSSFV ELKAALE  
DEVGSCLYTRGNNTVNLVESKIAALEHGEKAKLLGAGVAAISNAVMAFVRQGDHIIICVA  
DSYGWMQRLLTYLERFGVSHTIVDGTRTEDIERAIRPETRIIYLESPTSLTFFIQDIPAI  
TAIAKAHGIRTIMDNSWATPIFCNPIDFGVDLVVHLSKYLGGNSDIIGGVIVGKAEDID  
HIVWQESLQMGAVADPFMAWLVMRGMRTLHIRMPVHYRSALAVAQFLENHPRVASVNYPM  
LASHPQHELAQKLFRRGSGLFSFRLKTHSVEDVARFVDSLFLKRAVSWGGYESLVFPEA  
AHYAGSVPADRLNLIRLHIGLEDASLLVQDLAQALEGV\*

>SPBIB\_v1\_150020|ID:27162532| conserved protein of unknown function [Uncultured spirochete bib]  
MDRLETLRILSQAADWDAAAPSTRIEQSSCAPLDSAHTKAPSCPASEASRAGSSSPDSA  
VREDAAYGICRVKRLGGGSVPILKVLLSNACSYNCAYCVNRRSSNVRRASFQDELARTV  
SDFDARGRIHGAFISSGVLGTPDETMEQLIWTARSLRERYGYQGYLHLKVIPGASPD LVR  
LAMRYATRVSVNIELPSEESLVRIAPDKSPDAILSPMSLIAEHMRELQLNKADKPADDSL  
STIAASPLTAGQTTQMIVGASPEPDSTILALARHLYQSFNVRRVYYSAFRPEGTDPSLPH  
PAAPPYTREFRLYQADMLFRWYGFEPDELFEQSEYLDLDPKAAWALRHPGLFPVELMT  
ADFLQLVRVPGIGPTAARRILEARKKGGDLDFQHLQKMRIRLRNAAWFITLRGKTPFMEAG  
FDAFLPDDPGFGVFAPGFAVSRALDHPEILREIHKDKKPPVPPTQQELDFLS\*

>SPBIB\_v1\_150021|ID:27162533|lipA| Lipoyl synthase [Uncultured spirochete bib]  
MTIPKPSWLKVQLPHGREWRHVEEVLASKGLHTVCDEARCPNKGECWGAGTATFMIMGDT  
CTRGRFCVAVKTAHQGQPLDPAEPLHLAEAVKALGLKYAVITSVDRDDLDRGA AHFAAC  
IRAIRELSPGTLVEVLIPDYVGTELSTVLDKPDVLAHNVETVRRQLQSVDRRRASFDKSL  
QTLREAYAAGIPTKSSLLLGLGETEDEVLDA LRELSTGVSIVVMGQYLRPTPQEIPVTE  
YITPTRFAEYAEKARALGFASVISAPFARTSYHAREAWGAVDKSARKTGSGPRRGHEAET  
EGNTQGGSKS\*

>SPBIB\_v1\_150022|ID:27162534| conserved protein of unknown function [Uncultured spirochete bib]  
MKLDLIGKPGGCKLLRMTLEVEPLSPASRLQRISIRGDFFAVP EEAFFEEVEHELEGTAL  
DELGARFDALVLEKGIQCAGIGGAGLAELVQNLLVQKEQQHGT\*

>SPBIB\_v1\_150023|ID:27162535| Biotin/lipoate A/B protein ligase [Uncultured spirochete bib]  
MAHEFRLLLETGFHTAAFNMGLDEALLGSVAEGKSLPTLRFYGWKPPAVSIGYFQGLHEEV  
DVDACRAAGVDVRRITGGGAVFHHYEVTYSIVVPLSHQLARPNILDSYRLLGGIIDGL  
ALLGIEAEFAPINDIVTGGKKISGNAQTRKRGCILQHGTILLDVEVDLMFSLKVPQEKA  
RGKLIEDVKERVTSVQHFFKNRGQTPIFKFLYEETVAALKQGFASALDLSLVGSSPDEAE  
LAEAQR LADEKFA SRHWTELR\*

>SPBIB\_v1\_150024|ID:27162536| putative Histidine kinase [Uncultured spirochete bib]  
VLTALFQNTILISISVLYHFISRSLKGPWAVSVLNGVLLGVTAILTMLTPFEIEKGLF  
YDARSVVIGIAGFFGGPLTAAIAATIALAYRIPRGGAGVIPGSLIVFPAILSI IAWQAR  
QRYPANPQGRKPHMVLETWFLGLIIHASV VLAQLALPGGRWHQIPLMLFPFLVVFPLVF  
SLICLLFFDNERITKAALDLAESEARYRSLFENHHTVMLIIPSTGRIVDANPA AVEFYG  
WDRATLISMRIQDINTLSPEEVEAEMARARMRDNVYFYFKHRRANADPVDVEVFSGPITI  
KGT ELLYSIVHDNSLRIRAERELQALTQSLEQQVLDRTVLLEAQSRRQLQELNKEYEAFAY  
SVSHDLRAPLRAIAGFSAILGESLQAQGILKPAPDQKSAGSEANTIEAPDFGHLLDRIQS  
NVS RMQQLIDDM LMLSRAGTRKMNPQPIDFTQMAREILGELTEQQKGRHFECTVQDGMTA



IADPDLARILLVNLISNAIKFTKDRDIAHIEVGIEQNSDVPRFFVRDNGVGFDDVAAAGDR  
LFAPFQRFHSEASFEGTGIGLSIVKRVVARHNGRVS AESVPGQGATFYDFDFGEVKQT\*

>SPBIB\_v1\_150025|ID:27162537| Response regulator with CheY-like receiver domain and winged-helix DNA-binding domain [Uncultured spirochete bib]

MTATTSHESILIVEDNPDDAELVVIALRQKGINLPYLIARDGEEALDIAFRRKPLPDQKP  
IEPGLILLDLKLPKNGIEVLKELRSSQRTRYVPVVVLTSMLEEDMIQSYENGANSFVR  
KPVDFATFQHYIELICHYWLHTNLHPALAISQRPTS\*

>SPBIB\_v1\_150026|ID:27162538| protein of unknown function [Uncultured spirochete bib]

MTIVPQETDLNILIVEDNRDDVDLLMYRLRKSFKSVSYTHVSTLEQYLEAVRHLANGKLD  
RTSYNIIISDWA VPGYDGFVALQALQDVDETIPIVVS GTIGEPTAVALIKAGAYDFVLK  
DQSAHLPYVITKALEWADQRRIEQEQRRIEMQTKALSCSPIAMAILDNEGTFEWINPAY  
EVL TGWTLAELKGGHLLWEFTALASQSDCSQVFEELHKEAHQCEGMETRKDGSRYHELRLQ  
LAKLLDTNTTSQR YLLIRQDITFLKEYRTRLEIDAELPQILANCQTLHALYQQAAYIRR  
TFDIERAGFIRLDEQGTSVPPWYGDDMSQSLSLGIIQGTRFPVIVSGTTKALCVVEWKPS  
FMEGSALLLSYALEKMEQPLARLEAQENAREWMKRLSLLDVFREYFGSGRNFGAAISKVI  
RLIRETLRADSITLYISNNDGTAFACRNYDGFRTDLIKGAIQAGQKNVGLAVKELRIVAA  
DDLAQDSSYVPQFRELIAREHFVSQYCVPVILFNEVQAVLELFFRHPFKPDETWLFAQA  
AA YQTGLALEFQSVIEELDGAYQELQSANESIEGLSSALEFRDEETEGHTLRVTALFMS  
FASRFIQDENELKKLRIGSLLHDIGKIGIPDAILNKPSPLTPEERA VMQKHPLISKEILS  
RIPSLGDCVDIPLYHHEKYDGTGYPYGLKGEEIPLAARIFAVIDVYEALTS DRPYRKAWS  
KEKAIEYIRDNAGTHFDPEIALRFMELNL\*

>SPBIB\_v1\_150027|ID:27162539| Transcriptional regulatory protein [Uncultured spirochete bib]

MTVRGIAEKAGVSIGTVDRVLHGRGRVSPETKERILSIVRESGYTPNPIARHLKLNKHT  
FAIVMPDLDEDSGYWRIA YSGVQKAQKELAAFGVNIKRFEFNRYNRSSFAKAMAAFD PGL  
FSGLLIAPVPEESLLLLRRMPTDFPVVFFDAQIPSFTPLTRIGQNAFQSGMLAGRLLEA  
FSKRKGPYIIVSTHSEDIHQKRIEGFQAYFALAPHTIVLRECFDIEHKEKREFFVRQLL  
SEFPSIDGIFVTNASVHGIAARINSRAESPHVAIVGYDLVPENVRQLQAGTIDCIVSQRQ  
DHQGYQGLYQLYRKVVLGQDVEAEIEMPIDIYLKENLLQQALPEPQKIIS SPAPAIAPSA  
RLQGI\*

>SPBIB\_v1\_150028|ID:27162540| Periplasmic binding protein/LacI transcriptional regulator [Uncultured spirochete bib]

MKKLLL VVLVLSLLVPIAVFGQGAKKPVFVMVPKGVHPYYP EPCYEGFKAAA AKYGVTVQK  
VDPQKFELPLQVKVIEDLIAQRVDGIAISALDDAGLVPVIADAIKAGIKVITFDAPAPSS  
AALTYIGTDNETAGYEAGKKMADLMNKEGEIII LQGGLGAANLNLRTKGFKRALAEVAPK  
IKVLDVVDVQGDFAVATNKTEAILQTYPNLKAIFAVSAEGAPAAANVLRQQK KSGKIILA  
GFDDLKDTLEGIKDGTVSFCLVQKTYKMGWLSVEKLLDAMAGKQIPKVIDTGVLVFTKSN  
VNTYMDMKKEFNP\*

>SPBIB\_v1\_150029|ID:27162541|rbsC| D-ribose transporter subunit ; membrane component of ABC superfamily [Uncultured spirochete bib]

MVAQEKK SILATLFSYRESAIFLALIILMATVTIFAPNFMSGSNLYLVSRQISFVA VVAF  
GELFVILTGGIDLSVGSVMGLSGVVAAGAMAGGQSIILSVLLGLATGIALGLINGLLISY  
VRIAPFIATLGMLSFARGVILIVTKGW PITNIPKPF LIVGQGD FLSLPIPLWVMIVLAAV  
AHFLLSRTAFGRRTYAIGGNEQATFLSGINVKKIKVFLY MISGF MASVVGII LIARFNSA  
QADTGTGWELDAIAAAVIGGTSLSGGSGSIFGVII GAAIMGVIRNGLVLMRVSPYWQTAV  
IGIII VLA AVLDR IKNK\*

>SPBIB\_v1\_150030|ID:27162542|rbsA| fused D-ribose transporter subunits of ABC superfamily: ATP-binding components [Uncultured spirochete bib]

MSEPLLALKHISKSFPGVKALDDIDFSVQKGEVVGLLGENGAGKSTLMKIISGVYTPDSG  
DIFWQDKKIKLKSIMDAQEKGIAIFQELNNCPNLSALENLF LGHEIRTSANFVDFRAMK  
KKAKEIFS YLDVQIPLERPVGKLSVALQQMIEIGKALLADAKLIIMDEPTSSLTDKEVQK  
LFQIVKELKERGIAVIFISHKLEEVFIITDRIVVLRD GKHV GELK TSAATQDELVALMVG  
REMHSFFSKRTKEASDETILKIENFSGPPYIRGVSFYLRKGEILGLAGLIGAGRTELALL  
MIGAEQKTSGNMVLHGKEIDVRSPWQAIQHGIAYLSEDRKMKSLVLQMPVRANITMAIHS  
AVTGALGMLDRKKELEITNSFIRLLDIKTS GPEQTVNNLSGGNQKQVVLAKWLATKPSIL

ILDEPTRGIDVHAKAEVHKIITDLADKGTSIILISSELPEIVALSDRVVVMHEGQVKSVL  
EKKDISQENIMSTVFS\*

>SPBIB\_v1\_150031|ID:27162543|araB| L-ribulokinase [Uncultured spirochete bib]  
MEAVHNPQYVIGIDYGTDSGRAVITDASNGHEMASAVAPYPRWSKGLYCDPAKNQFRQHP  
LDYIESLETVMQKLAQTGTELLPHVKAMAIDTTGSTPCLVTEHIEPLAMLPEYSDNPDA  
MFVLWKDHTATDEAFQINELARKWKVDFTMYEGGVYSSEWFWAKLLHIAKAAPDVIRAGF  
SAIEHCDWMPALLTGTRSLSQVKRSRCAMGHKAMWHESFGGYPGDEFGLALHPPELVRIKK  
TLGTETFTSDTVFGALTGEWALRLHLSAGIPVAVGAYDAHMGAVGGGVEEGVLVKVMGTS  
TCDMIVGPKPAEENRAGKPSSEEHAGGARAGGGGRATGDHVGEAQTEGGRAAAGESEHLVK  
GICGQVDGSIVPGMLGYEAGQSAFGDVYAWFKNLLMWPLRELGTVEVDQGTVEVDAQAARAF  
IEELDSRIMLMLEKAASQINPGESGVLALDWLNGRRTPDANQKLKGALTGLTLGTTAPMI  
YRALIEATAFGTRAIVERFELEGVQIRKIRAIGGVARKSPLVMQIVADVLRPIEIVASD  
QSVALGAAMFAAVVARIYTSVPHAQAAMKPNIEAVVTPNAANTAIYDGLYRQYLKLGFSI  
EKELT\*

>SPBIB\_v1\_150032|ID:27162544|araA| L-arabinose isomerase [Uncultured spirochete bib]  
MKAFDSYAFWFVVGSTLYGPKVLEQVNAHALRIAFLNQNAAIPATVVPVAVVTSPEEIT  
SLFRKANADPSCAGIITWMHTFSPSKMWIQGLSENAPLLHLHTQFNRDIPWDSIDMDFM  
NLNQSAHGDREHGFIHTRLKTLRKVVVGYWQDELVLNRIAAMRAAVAFADGKTAKVARL  
GDNMREVAVTEGNKVSQAQIQFGWQVNGYGIGEIARRYAEASPRDIDAVLEQYQSRYVILD  
SVRHDSQFKQVREQAAIEVALRQFLADTRAGAFITTFEDLAGLPQLPGLAVQNMADGY  
GFGAEGDWKTAALVRAMKTMARGLEGGTSFMEDYTYHLEPGNELVLGAHMLEVCPTIAAV  
KPQIEVHPLSIGGKDDPARLVFEAKPGMAVAATIIDKGDSEFRILNEVEAVALPRAMPKL  
PVARALWKPLPNFKSALELWILAGGAHHTSFSYVVTSEMLEDYARMAGIEVVVIGKETS  
V  
PLLRKELEKDFLR\*

>SPBIB\_v1\_150033|ID:27162545|araD| L-ribulose-5-phosphate 4-epimerase [Uncultured spirochete bib]  
MLESLRKEVLQANLELSDRGLALFTWGNASAIADRARGLIVIKPSGVPYERMTAGDMVIVD  
LDGKVVVEGTLKPSDDLPHLVLKYAFSSAMGIVHHTSTYATAWAQAGQDLPAEGTTHADH  
FYGSVPCTRLTDEEILGDYELETGKVIVETFKSRAIDPSSVPAALVHSHGPFVWGTSAL  
EAVHNAAVLEEVAKIAILSRMIAPPSPMQASLLARHFERKHGKNAYYGQK\*

>SPBIB\_v1\_150034|ID:27162546| protein of unknown function [Uncultured spirochete bib]  
MNIKIILNGGLKTCKSYSKEYIHEAVKSWLTDKDVLEVVDVREQAYKLDELAAYAKQFF  
QENTFPVYIDRLIAIGQIPDKNSLFEVS AKLDEYQITREAIYKAAKEYELVPAEQEAE  
EV\*

>SPBIB\_v1\_150035|ID:27162547| Extracellular solute-binding protein [Uncultured spirochete bib]  
MKRVLLAAMIALVALSAFAQQKVTLTIESWRNDDIQWQDQIIPAFEKKYPNIHVVFAPT  
PPAEYNGVLNSKLEGGTAGDLITARPFASLALYNKGYLADLTNLPGMNNFSNVAKSAWI  
TDDGKHVFAVPMASVIHGFFYNKDIFKKNLKVQTKAEFMQVLEAIKKDGRYIPLAMGT  
ADMWEAATMGFQNIQPNWKGEEGRLLALLAGKQKYTDEPYIKTWKELASWAPYLPKGYQA  
VKYPDAQQLFTLGKAAIYPTGSWEIWLFEKDAAFELGIFPPPVEKKGDTVYISDHTDIAL  
AMNAKTKYPEEAKKFLWMTTAEFASLYSNALPGFFTLNHNKITLKDPLANEFLSWRATC  
KSTIRNSYQILSRGDQYGAPNLENELWQVSAAVINGTMTPEEAGKRVQAGLDKWYKPKK\*

>SPBIB\_v1\_150036|ID:27162548| Sugar ABC transporter, permease protein [Uncultured spirochete bib]  
VLDIRGSRKFPFLVFLGPAACIYTLFMIYPLAESLILSFFSVQPDNSYVFSGFANFVK  
LFTSDTAPRFWGALKNNVLFIIHMLVQNPIGLLLASLLVTKGKARGFYRTVLFMPTVL  
SVVIIGFIWQLILNPLWGVAESMMRAVGLGKLFQPWLGLPQYALPAVALISVWQFIGIPM  
ILFYTALIGIPDELIEAAVVDGCTETQAFWRIKFPILPTIGIVSILTFVGNFNADFLLIY  
TMKGAFAGPAYSTDIMGTLFYRTFFGQQLQGNPTMGATVATMMFLIILTGVLIYMFLFQ  
RRVKTYQL\*

>SPBIB\_v1\_150037|ID:27162549| Carbohydrate ABC transporter membrane protein 2, CUT1 family [Uncultured  
spirochete bib]  
MMKRRASRSRDLARQRFRLQLQHILVFFSLIALFPILLILMNSFKLKKYIFAAPFALP  
NAKTFSLIGYDTVLQRSNLIVNFGNSIIVTVASLFLILLFGSMAAFALSGYKFRGNAFLG  
FYLSIGIMIPIRLGTVSLLKLMASLGLVNTLTGLLIIYIAQGLPLTIFILTSFMSQIPDE  
LKDAGRIGDASEYRIYALVLPLVRPALGAIGIFTMIPIWNDLWFPLIVAPSAKTATITLG

VQQFLGQYVSDWNAVLSALVLAMVPVLLLVLVFSRQMIRSVTAGAIAKT\*

>SPBIB\_v1\_150038|ID:27162550| putative dehydrogenase [Uncultured spirochete bib]  
MKIGIIGTGFMGSTHAGAWKKTGAKIAGFLADPPSEAEQIAREYGAHVFSLSLEELIESVD  
VVDICSPHTLHSDMAIAAARAGRHIKCEKPLARTVEQGEAILDACRIAGVRLVFAHVVRVY  
FPEYALAAARVHAGDIGKVGTAQYRRLSYRPPKPVGNWFLDEEKSGGILLDLMIHDFDIA  
RWIAGDVVSVYAKKVSSFRKESPADYGMVILTHASGALSHVAGAWAYPPPVFRTGFEVCG  
DAGVIQHDSSESPIEALLKQEKSEAPDVGLPASPLAESPYDLEIADFYRCLIEGGEPV  
SAADGLAALKIACAAIESAKTGQVIALDSRREARQAELELTGELATSKGGQR\*

>SPBIB\_v1\_150039|ID:27162551| Oxidoreductase domain-containing protein [Uncultured spirochete bib]  
MKIGIMSAAHVHADAYIGCLRSIPEVDIVGIADHDNERGALFAQQYGLHYFASYEALLGQ  
KLDGVIITSENAFHIELAKKAAQTGVHILCEKPLATNVRDAKEIVDAAKKASVILMTAFP  
MRFVSPVVRTVKEELVSGKLGALLCFNASNQGQLPPRDRAWFTDPVLAGGGAIADHVVHLA  
DIMRWYVGTEVVEVYAAANRIFHADEVQVETGGMVSMQFENGIFATIDCSWSRPDSWPSW  
GGLSFDLITDKGAVRVDAFRQNLTIYPAPKASASSANAKTAPADTTGVASGAGADHDWTT  
AHSHGDRGFGPRWLYWGS DANQAMIEEFISAIQEGRQPAVTGEDGLAAVRIIEAAYKSIQ  
EGKAIMV\*

>SPBIB\_v1\_150040|ID:27162552| conserved protein of unknown function [Uncultured spirochete bib]  
MHFNLYKSGTA AVDLDDSRIIDVVLKPKRPLADALESVRRVLAKPEGTPPLAEMLAAR  
KPKKLIVVNDITRPTPYSVLMPLLEVIQKAGIPDSHVTLVTATGIHDPHTPEQNILVY  
GEEICRRFRVISHNATDPAGLVYKGLPSGYDFWLNKL VDEADFLITIGVVMPHYFAGFS  
GGRKSILPGVAGKETVQKNHARMVELMDNLPPIRENPVSLEMIHAARLAGVDFILNVVVD  
DNEQVVEVVAGDFEKAWYKAVDVSESMYMIPIKEQADITVSAASGFPRDINLYQSQKALD  
HADRATKKGTTILVAECREGYGEKVFEFEMNRGWTPQHIMAEIKAHFVMGGHKAYGFAK  
VAAEKNIIMVSSLPEKIVASCFARKAGSVQEA VEMALKEQGTEARFIIMPEGSVTPVIA  
AKDG\*

>SPBIB\_v1\_150041|ID:27162553| conserved membrane protein of unknown function [Uncultured spirochete bib]  
MTYEVLMSQLTSIFTVQNLLYMIIAIVLGIMAGALPGFTATMAVALMIPFTFTMSPVSGL  
ITIGALYCATIFGGSFSAILLNTPGTPSSIGTTFDGYPMAKKGRGMEAIYTATIGSGVGG  
ILGTFLILFAVPLAKAALKFGPPEFFWVAIFGLTISSISEGSLKGITAGVLGILVSM  
IGNAPVGGDMRFDGLVSLQGGVEIVSVLIGFFCIPEIFRMAMNPSSKYTDENVVSLEKG  
SLKRAFHHVFGHPLATLRASIIGLFVGILPGAGGNIANLIAYNEAKRASKHPETFGTGEP  
QGVVATETSNNAVVEGAMVPLLALGIPGSPPAAIHYGALLQGLSPGPQLFVRNASLVYA  
FMLSFFVANILMVIIGFFAGKGMVKTVIKVPVRVLIPSILFLTILGSYAIRNNAMDVIIM  
FLSGIIGYILKDLGFNTGAFVLGLLGPPIAERGFVQGFMLGMNMSVKMPWIIFFTRPLSI  
VLIVLSIISGAWPIFRAAMKKRDRSAIAEALAFSTSGSGTDVDGSQKKTINSYIGAAI  
VFGISALFYLQIGKWSKYAIMAPRSILILLIALGVALLVKGRIPKPEKVIPSFAINRSLV  
FLVVVGLLWVFLMEKVGFVVTSM AAYTAILIAYYPGKGARRVIESLLIAGVIVFGMYLLF  
EKLLNVTLPLGILI\*

>SPBIB\_v1\_150042|ID:27162554| conserved exported protein of unknown function [Uncultured spirochete bib]  
MKMVKRVAMVLI AVLVLGSAFAQFPQKPLSYVIPFNPGGESDIFARAQQPLLEKILGQK  
VVVSYKIGGGGAVGWAELVRTKPDGYTFMGYNLPHIILQPLSLANAGYKTNEIVPVYTFM  
STPNILAVSANSFPKTLDDFVKFAKANPGAVTVGGSASASANEIGTVLNFNKLGIKTTYI  
PFTGSGDAIPALLGGHVSALMTYTTMGNQYEGQIRVLAVASEKRVSSLPNVPTFRELGYD  
LVEGAYRSAAVPNTPEGVKKVLADAFDKINKDPEFAKKMEANGFKLEFYGPKESEKLVE  
EKIKVYTPLVSELGK\*

>SPBIB\_v1\_150043|ID:27162555|leuD| 3-isopropylmalate dehydratase small subunit 1 [Uncultured spirochete bib]  
MKITSSLVYKFGNNDTDQIYPGRYLELTDHEEIGRHAMEGADPTFPSRFKKGIIVAGT  
NFGCGSSREHAVITLKNIGVA AVLAKSFARIFYRNCINLALPAIMPELDSFGLEEGQSI  
DLDLARGVLT SNGVSHHFVPLPEDILELIDRGGVFALYKS\*

>SPBIB\_v1\_150044|ID:27162556| protein of unknown function [Uncultured spirochete bib]  
MRVSLYFDKFERGSVIVPLKADAAVAGETT\*

>SPBIB\_v1\_150045|ID:27162557|leuC| 3-isopropylmalate dehydratase large subunit 1 [Uncultured spirochete bib]  
MHAIEKILALASGKSQVSAGEIVTAEIDVAEVNDLYLQVVKSFYELGGTEVKFPDRTTFV  
FDHYSAPTIKAADNHRQMREFCKKMGIKALFDIGKGVCHQVLIESGFVSPGSLVVETDS

HTTTLGALGAFGTGVGATDMALILRNGSLWFRVPEVMKIVLDGELKPGVMAKDLILHVIG  
 KLKQDCAIYKCVFEFAGSAVDAMSIDERLVLCNMSVEMGAKAAAYIQPDEKTYAYLARYGIQ  
 HAKREVFTDPDYRYSAEYHYDVGTIEPSTALPGSVDNLALVREQEGIHIDQIFIGTCTGG  
 RLNDIETAARILRGKKVAQGTRLVVIPASEVVFVKQALAKGYVQTLVEAGAVFSTPGCGPC  
 LGAHEGVLASGETCLTSSRNFPGRMGSTEAKIYVVPATAAASALSGETITDPRSNLSK\*  
 >SPBIB\_v1\_150046|ID:27162558| Sigma54 specific transcriptional regulator, Fis family [Uncultured spirochete bib]  
 MAIVFIAPDGHIERVEKLSGASREKIIVAQGLLEN AISVARKYQEEAEVFISRGGTVLV  
 LRQADLNIPVEMQVTARDLAVALKKAELVKKEKFRIGVVSFPNMIQQLKDFLPFFSLD  
 ITCYELSIGEDVEKKLKLAMNDGMDVLLGGVTTYAFAKRNGLPVVLVESGETSVKYALEE  
 AKRIVAAQRLKERRAEELRIITESISEAIIAIDEKGAISRMNNAARQLLSKSQYSFRDHG  
 TRGSSSSPRMGTEDASLPAALRNVIHEKKESRKIIELGNKRLLVNVIPVTVKGA VASSVA  
 TLQDVSHIQAMEEEIRREMYFKGYTAKFHFDIVAHDPITQKTIDLAKRFASTNAAILIH  
 GESGVGKEVFAQSIHSASMRSSRPVAMNCAAIPESLIESELFYVDGAFTGARKKKGKPG  
 LFELAHGGTIFLDEISEMPFHLQARLLRVLQEHQVMRLGDDKIIPVDVRIIAATNRDLPM  
 LIKSGQFRNDLYWRLNVLNLYLPLRERKKDILPLIHHMLHESDGCGLAPQISDDCKLYL  
 ESYWPWGNVRELKNFCERISAICDEPILTTALAASLLQADNRAAERSEQKMGTELGSTFP  
 PQPKDIFSSSESLRNLVDSFGSIQAAAHYLG IHR TTLWRHLSKPD LAKRKQSGV SQ\*  
 >SPBIB\_v1\_150047|ID:27162559|parE| DNA topoisomerase 4 subunit B [Uncultured spirochete bib]  
 MQSKTWRISGSKAKLAVRGSFGDGGFGQGLHIIKNKNTNGIHNAQRFWGQRLKSPVPRPP  
 AHVSIYVNGKNPVYDESKIKTLSSLEHIRLRTGMYIGRLGDGSSPDDGIYILLKEVIDNA  
 VDEFIMGAGDHILVQIDGSRARIRDFGRGIPLGKVICVSVINTGAKYDDDVFQFSVGLN  
 GVGTKAVNALSKEFRVVS YREGRFFEARFARGILIDTREGGSREKTGTLVEFIPDEEIFG  
 EYSFIFDFIEKRLWNYACLNPG LILSLNGKEFHAEKGLFDLLSAELGESPLYDIGWFRGD  
 RIEFAFHTHTKEYGEEHFSFVNGQYTS DGGTHLSAFREGFLKAINDFEQASYRGEDVREGL  
 AA AVAIRIKNPIFESQTKNKLGNSDIRPWILQEVKKG VDEILRRNPQAAKILQEKILTNE  
 KLRTELNIVRKEAKEAARKIELKIPNLKDCKAHLGDGGLGERSTIFITEGQSAAGSMVST  
 RDVHTQAIFSLRGKPENMFDRPRSAIYRNEELYNLMMALGIENNVENIRYARIVIATDAD  
 YDGFHIRNLLLTFFLTYFEELIVKGRVYLLETPLFRVRTKKQTRYCYSVRERDEAIKELG  
 PGTEVTRFKGLGEISPAEFGQFIGKDMRLVKVDIQTLSVPELLGFFMGKNSPERRKFIM  
 ENLVTEL\*  
 >SPBIB\_v1\_150048|ID:27162560| DNA topoisomerase (ATP-hydrolyzing) [Uncultured spirochete bib]  
 VAYIKKLLTDNFLYYASYVIMDRAIPELDDGLKPVQRRILHSLFEMDDGKFHKVANVVGH  
 CMKYHPHGDAIASALVYLANRGMFIETQGNFNGNPITGDEASAPRYIECRCTQFAKEIFY  
 RPKITRYVDSYDGRNKEPVVFPKIPVVLMLGAEGIAVGMSTKILPHNPVEVLKAEIACL  
 QGKPFALLPDFPTGGIVDCSEY AEGTGKVRVRALLDTS DPKKIVIKEIPFGSTTESLIAS  
 IEEATRLGHLKIASISDFTTDKVEIEIKLARGVYAQDIVDALYAFTECERSISCNCLVIR  
 DEKPTLTTVSEIVRYHAGKLLNLLRQELELERDELRAEIFARTLERIFIEERIYKSIESK  
 RTSDSVIKAVIDGFKPFSKELKQAIGTEDVEHLLKIPIRRISLYDIERAQNEMEKIQQQL  
 SEIDKHLNNLVEFAIDVLKTYIKMLEANWPRRTKIKTYKKIEARAVARHDIALRYDAEAG  
 YVGTEVS GEKVLEVSAYDKILVLRKNGIYTVLPLPDRIFV GQELLWIAIANKELLSEQPI  
 TMIYKLLPKGAYIKRTIIDS WLTGKDYSLVPENAEIIGFSTEKEFSFQLEYKPKPRIKK  
 IKEIFNASRYPLRGKQAQGIKLTDREIANFIIIPSSIGKSNSLEPENLLPINLCMSQNK  
 KQNTGTEDNSLIQIDDSRRESRKKQAKEQSPSQSSLKEKRNQTIQSKKEQPAIISVKRA  
 KSKKMTTKMIEKNPSESQSIQQNEAKVSQLELGFSTSVPKNSSESKEQTRTDNAASHSRG  
 LLEAALKKHKNDR\*  
 >SPBIB\_v1\_150049|ID:27162561| protein of unknown function [Uncultured spirochete bib]  
 MVRVKIAITTYEPALYTDLYPVFEDSPHLIIVDEYNRIQKYSPEITAKGTIRGKTEWIS  
 RGAKVLVTGSIEDEHYEKLTKAGIAIDWVGFGNAKDLVERARKSAAFLVDKLT KVKVVRT  
 RFDKRLRPKSYTTCYEIPYIGNDPQFIEELERKAKRQGKKRLLKPKEEEDLDEGFDEEDD  
 DLFQ\*  
 >SPBIB\_v1\_150050|ID:27162562| protein of unknown function [Uncultured spirochete bib]  
 MRKPRFTLPGARYHIIARANRGEFIFQRREIKDLFLALIRKAKKRYKFAIETFCIMDSHI  
 HLIIRPLEGESISRIMQWLLSVFALRFNRFFGLIGHVWMDRFKSFILFTDAQRMKAHAYI  
 ANNPVSAGLVHSPYHYSHSAAKFILAGDFSIIKPPNLLEFYCNLEMTYHS\*

>SPBIB\_v1\_150051|ID:27162563| putative Malate permease [Uncultured spirochete bib]  
MTLSRVVSIFLLL VVG FIAQKRKILSDGIKTISNFVLRVFLPFTIISFSDKSISLSAAG  
DLLKVAIFAIGVHALAIFISKLAYSRFPDPKRKILTYITVFSNCGFMGFPVAESVFGKIG  
LMYTSIYVMVFNIFVWTYGIALLESEGKEKKNIWHSILLNPGNIAFAIGFVLWVLPFGLPE  
TLNYAVLLLGNCTTPLSMIVVGATLANLGIKGLFSGTEVWIGSIMRLFVVPALVLLLFI  
LIGIRSDAAKVANFLAAMPAAAQTVIFAERYDADVSLASRIVFISTVLSAITIPLASGIIA  
G\*

>SPBIB\_v1\_150052|ID:27162564| conserved protein of unknown function [Uncultured spirochete bib]  
MRLIRCEYDQKGVYHGRIEKDEVILFEYFPQIEMKDGQKRILLAEKGRVPLSVVHLKAPC  
VPGKAVCVGLNYRDHAKEFGLAIPASVPLFIKSTSLDPDEKILYPSISSRVDYEAELV  
AVIGAKARNIEKKDALNYILGYTCGNDVTARDLQPKDGQWTVAKSFDTFMPLGPWIETEL  
DPSNLRIQAILNGEVRQLSSTENLIFNVADLVAYVVSQIMTLEPGDVMITGTPSGVGMQK  
GDRIAIEIQGIGRLENIVA\*

>SPBIB\_v1\_150053|ID:27162565|yeiN| conserved hypothetical protein [Uncultured spirochete bib]  
MNPYLDITEEVADALHAGLPVVALESTIISHGMPWPRNLETALAVEDAIRKEGAVPATIA  
IINGRLKVGLSREELTLFSNSSLHPAKVSRDLPIVVAQNGNGATTVASTMIASMAGIR  
FFATGGIGGVHRGAELTWDISADLDEFARTDVAVVCAGAKAILDLAKTMEYLETKGVPVI  
GYRTSELPAFYSRESGVMLSQRADDPMEIARLLHAKWSLGLSGGAVIANPVPIEYSMTKN  
EIDAAIEQALEELAEKRIKGAAVTPYLLARVAEITGGDSLETNIALVINNAHLAARIAIA  
YEQMSEK\*

>SPBIB\_v1\_150054|ID:27162566| protein of unknown function [Uncultured spirochete bib]  
VHRIEESSEPYCVVIGGINIDIQGFCAAHIEKDSNPGVITRSLGGVGRNIAENLVRLGV  
RTELITVLGNSPAWEALISRIEHLGIGVSHSPRLADVPLPMYLCILERDGLVSAVADMR  
AIERLQIEHLENQDSSLRKAACIIDGNLPKACIEWIAQQYHAANSQNKKTIPAALSSTE  
RENVFVSRDFADPAGKDQNGDRGFQNAVQSQIAVSQHPILIADPVSSSKAVKFRDCFGL  
FDIAKPNLAEASTIANFGPTATPSQIIAALKAKSILPNELYLSLGEKGMVIEDDSIHEI  
SLPASNLRPPAANRSGAGDAACAALAWVSIRSMFSERLKNGQFSNLRPSAKAKFALSAAL  
LASASKRPVNPKLDPRMLCEKIKFWYPELSDLVEYMMQNGGII\*

>SPBIB\_v1\_150055|ID:27162567| putative Heat shock protein DnaJ domain protein [Uncultured spirochete bib]  
VDQIFDRLERLVRAWTSSAFGEGFGRNNFGSSDIFKDQDLADAWEELESYLDPSKTESER  
EAEMRRRSEFRSQASNDQDPRKAIERQAVQDAYRFLGLEPYAPFAEVKARYKELLKKHHP  
DRHTASPEDMKTATAVSAKINAA YQLIETWEEARAQKAR\*

>SPBIB\_v1\_150056|ID:27162568|polA| DNA polymerase I [Uncultured spirochete bib]  
MNEKDPLYVLDVYAFIYRSYFAFIRKPLRNSLGENVSAIFGFFRFLFSLFEQRKPILFAA  
ALDSIGPTFRHEQFLTYKATRQKTPEDLIAQIPKIESILRALEVPTIRCEGYEADDVIAT  
LATQCSREKRACFIVSGDKDLLQLVGGFTKALRPSEGFSFREINENGVLKEWGVLPDQIR  
DYLSTGDASDNIPGVKIGDKTAQKLISQFGLDSIYQHLNEIEPESLRKKLEAGREDA  
FLSKDLISLCDNVSPCPSDVASLRASLNMAAAAPLLLREEMKSLVPESLRNKKGVQTSVP  
KASTRTSAEADKNEIQTSVPNLSNKLKPEVKHGEGLASIEAQASQQSPSLFSRTDNVPVY  
QAILEEEKLEEIIDAALAHGVCAFDTETNSLDSHARIVGFSLCYEAGKAWYIPLSPDS  
KCIPIHKKALAALSRLVSATQMLLVGHNLKFDINVLAAGGTEVTSPCFDTMVAAWVLDAEA  
PSFSLSSVAARFLGLSGLEYDQVVPKGATFADVPLATAVQYAAEDADFSFRLYQRLSKEI  
DSAQLHNVFYDIEMPLLPILAEMERTGIRVDADKLRAYGVELENELAKIQSEVFHLVGH  
FNLGSPKQLADVLFVERKLPVQKRTKTGFSTDTSVLEELAPLDPVPQLILRHRLTLKLN  
TYIEPLAALAETSGRVHTTYVQTGAATGRLSSRDPNLQNIPIRDEEGRRIREAFIAEPGH  
KLISADYSQIELVVMHLSKDPNLKAFKEKVDIHKRTASFIFGIPEDQVDASQRRIAKT  
INFGVIYGMSAFRLARDLGISNALAKEFIDSYFSTYSGIAEFIKRTIEEAQETGITSTLF  
GRKRRILGINSRNKTEQQAHRVAVNTPIQGTAADIVKIAMIKIHRALATQMPEVRMLLQ  
VHDELIFEAPESSVPAIDLIKEEMEHAVQLDVPLRVSVESAISWGMHL\*

>SPBIB\_v1\_150057|ID:27162569|coaE| Dephospho-CoA kinase [Uncultured spirochete bib]  
MHIIGLTGGYCAGKNEVAKILSA YGWEVVDVDKLGHAALSLSLAIKHAFGSHVMNEDGS  
VDRTKLQIVFSNAQQMQILES L VHPAMLSLLDREIQRAREQKKEKFCINAALLYRFPQL  
SLCEAVIEVQAPLFLRVSRAKKRDNLSATRALKRIFSQRELWKLPRKGAQVIFILLNSGK  
KEQLENKTKKLIKLSQDLQR\*

>SPBIB\_v1\_150058|ID:27162570| putative Sporulation repeat domain protein [Uncultured spirochete bib]  
MSDRSKKILWIAVAVSGFALVVFLAAFLFPSEASESRPFDLTRRSPSKPLSPNDFSAF  
PSIVVQPSGESSQLPTDSQANSTSEKKSSSTVIVVPAPAAQTNMNASQTEGESAVASSA  
PKPASSVSGQSAVKTPQTSVPAKPPATSVAPVPAKPPSPSPSTKAASSAEYWIQ  
VGSFSAKGTADKLRDEFTARGMTSIIA VKEIGGRNYYQVKVGPYPYSADEAKKWLSTVKAV  
QGASQDAFVTTR\*

>SPBIB\_v1\_150059|ID:27162571| Purine-binding protein BAB2\_0673 [Uncultured spirochete bib]  
MRKIVLGLIAILMLVSLVLPATAQAKKPLKVA FVYIGPPGDLGWTYEHERGRLAAQKYFG  
DKIETKYIENVPEGPDAERVIRQYAIQGYDVIFTTSTFGYMDPTYAVAQEFPKVIFEHCSG  
YKTAPNMATYFGRIIEARYLTGIIAGRMTKSNKIGYVA AFPIPEVVRGINGFTLGVRSVN  
PNAKVQVVWTNTWYDPVKEREAVALLDAGCDIIAQHQDTTEPQKAAQERGLSIGYDSD  
MGKFGDVLASAVWNWETYYIATIQNILNGTWKTHEFWGGLKDNI AKLSDSLSPRVPANV  
RKEVEDAQKKILSGWKIFSGPIKDQSGKVYKAGEVVPDDKQLSMDWFVEGVVGVKQV\*

>SPBIB\_v1\_150060|ID:27162572|yufO| Uncharacterized ABC transporter ATP-binding protein YufO [Uncultured spirochete bib]

MSETVIPKVEMRGISKSFPGLANDCVLMLHRSEVLALLGENGAGKSTLMNVLCGLYRP  
DKGEIYINGSYADIHSPRDAQKYGIGMVHQNFKLVDSMSVLENILGLKDEPFIPDFKRV  
RQRLVDLAAQYHLKVDPNANIWQLSVGEQQRVEILKLLYRNAEILILDEPTAVLTPQESH  
ELSRVVHAMKQEGKSAVFITHKMEEVMEFSRVMVLRKGVVAEARTADTPKELARMMV  
GREVLFQIEKKPFCPEVLELSNIDALGDRGLLALNNVSFQLRAGEILGIAGVAGNGQR  
ELA EVVTGLRRSTKGALRIGNKDMTNKSPLEIIRQGV AHIPQDRSSVGAVGDLSVASNLA  
MKQYRSRPLAAGIFLLPKRIVDLARALIEKFHIATPSPQTQVKFLSGGNVQKILAREIG  
AARTVMVA VYPSRGLDVGATETVRRQLINQRDGGGLVLFSEDLDELLQVSDRIAVLFEG  
RIMGIFDADKADIEQIGMLMAGMSKEATA\*

>SPBIB\_v1\_150061|ID:27162573| Inner-membrane translocator [Uncultured spirochete bib]  
MKFVFEKRKSTSPALILVPLISFAVSLVLTALLAIFGADPFKTYAAMA V GAFGTSHGF  
AETLVKAIPLMMTGLGVAIAFRLKFWNIGAEGQLTLGGVAAAGVALFMERYFPGRSLLFA  
ALFGLLAGALWAGIPAILKTTLKVDETLVTLMMNYIAILYSEFLYGPWRDPKGYGFPG  
SRMFSANAWLPRIMGRAHVGIWVGIALAILWLVLKRTRWGFELQIIGASQKAARYQGIA  
VERNILAVMLSGALCGLAGAFEITGISHRLQQLSIGYGYTAIIVAWMSQLNPLAVPFV  
AIALAGLSVGGDQVQMVMGLPAAMGVVMQGLILFPMLAGSLFTEYRFLVVKPEPRAACPE  
PSQE\*

>SPBIB\_v1\_150062|ID:27162574| Inner-membrane translocator [Uncultured spirochete bib]  
MDFLTSILTITIRAGTSLTIATIGEILTERSGILNLGVEGIMLMGALSAFTAVFYSHSIA  
IGLLVAIGVGGLLALLHAFLTTTMRANQVVSGLSITLFGTGFSSFLGQRLGPVANNFRLV  
GLRAERIVPLAPEWVKQIPIISAFFNQDIITYLVYILLPLAWFFLYKTRPGLWLRVSVGED  
PQTADAMGIDVTKTRYLYTILGGMMIALGGAHLSLSYTPGWSENITGGRGWIVIALVIFS  
MWNPARAVWGALLFGGINAVQFRLQASGTSIPANFLNMMPYIGTIIVLVVMTWWEALS  
VGAPAAALGTSYMREDK\*

>SPBIB\_v1\_150063|ID:27162575|ade| Adenine deaminase [Uncultured spirochete bib]  
MNRDVIDAATGKTICDVNYTNCTVVDVLSGRFLPNSIVSVKGGFIAGINDGLDAKESINL  
EGMFLAPGLIDAHVHIESSLLTPAEYARVVLPRGTTTVVADPHEIANVMGYDGMRYMLNV  
SRDIPLDVYFMVPSVCPATDFDTAGAAALYASDMHQFLQEPRVLGLGEVMNYPGVLARNPQ  
LMDKIALFQSNRPIGDHSPGLRGASLSAYVVAGIGSDHECTTPEEAL EKVEKGM YIMLR  
EGSTAKDLRPLLPAITRENASRFMLCSDDRHCNDLRDEGHMDFSLRMMLEGGIDPIDAIR  
IASSNAARWFGIPGQGAIA PGYKADFVAFPSFEYFEAKIVVKNVIVARN GALVQEFATV  
GTPIRDSVNIKWLTIDDFVIPDKGKPV RVIEVNRESLLTGNGISRLEGIRGRLSADIERD  
ILKIFVIERHTGSGNIGKGFHGLGLKRG AIGSTISHDSHNMIAGVDDVSIFKAARHLN  
KIKGGLVYAVGDEILLDLPLPVAGLMSDKPADFVIERLTA FEKLF RQEGLTATSPLMTLS  
FMALPVIPSLKITDMGLVDVDRFERVSLYVD\*

>SPBIB\_v1\_150064|ID:27162576| xanthine dehydrogenase, Fe-S binding subunit (modular protein) [Uncultured spirochete bib]

MALLYIKVNNAWRGLASAE GMPVLDVARGELGLTSTKEGCREGDCGACAVLVGEQIANTV  
RYRAVPSCLLALGELK GKHLLSLEGLIEGTEDGLTPVMRAFIEENASQCGFCTPGFIAL

TSWLAEPQVPDLGALRAVDGNLCRCTGYAAIRRAAARLVEQFRDLPLEPIARLKALVSA  
QVLPQSVLKFIEESKSSSLQTSVPNGATIGTGLDMAGHDNKKAVASTLDPVIVGGGTDF  
YVRNPDPEDEGFSPLLTRMIPEFALVEYRDEPQGQWLEIGAAVTVRDFVVSPLVQREIPGI  
GRFETMFASTLIRNLATVGGNIVNASPVADITSMLMALGAQLVIVPEARAYEPQAPIRLC  
PLEQFFLGYKKLDRPGEVLKAIIPAGANRKFSEKASKRKNLDIAAVNTAIAFKIEEK  
HFKDVRISLGGVAPVPMGLTAAMEVLEGAPCNPADRKTLASLAMKTAQAASASISPIDV  
RGSADYRRRMVHQLMLAHFVRFEEASGIAEELFP\*

>SPBIB\_v1\_150065|ID:27162577|xdhA [H] Xanthine dehydrogenase, molybdenum binding subunit [Uncultured spirochete bib]

MKEADMKVDDKKSMAFLDEADARSGTAHHEAISIPDAASVIPESLPNVLGQTQYIDDIPRP  
AGCLQAAVRLSDSAHARILAIHTEEALSLDPSVRVILAKDIPGTNQIGFNKPDEPLLPEE  
EWEYWGQPIAIVVAKTRSLARKAAGLLRVESEELPAVIDPREAAAKGDFILPPRTIACGN  
VEEAFKCAYYVEGRVDSGGQEHVYLETQGAIAQVIDGRRMHVISSTQGPTGVQRAVAQV  
LGLPMNMVEVEARRLGGAFGGKEDQAANWASMAAVASWVCGKPVLYLNRKDDMRATGKR  
HPYTTDFRVGADADGKLLAFEADYYQNSGSTCDLSAAILARTLLHATGAYQIPNVRVTGY  
MCHTNLPSFTAFRGFGAPQAFFVIEAAMDALAQKMGTEVVELKRRNLFREGDRTYYGMA  
ERVRASESVERLLAKVDYPALSQRIKTFNATHRLQKKGLGFIPVAFGISFTKLQMNQAGA  
LVHVYTDGSVVVSTGAIEMGQQVARKIALVTARTLGVPVSYVTVQRTTTLTVANTVPTAA  
STGADLNGMAAKIACQEIRGRLVQKAADLLKAAPEKIDIREGIILCDGKPASLTWKQLVE  
AMHAARQDLSAHGFYATPFLEYDMKAERGRPFAYHVYGAALVEATVDILRGTSTLDSVSI  
VHDIGDSIDPAVDRGQIEGALAQGLGWSLLEDLRFPGDKPLSDTLSTYKVPDVTMPEN  
IDIEFLPIENPTAPYNSKAVGEPPLQYGIAGYFAVLDAIRAAIGKPIVYYNLPLIPEKI  
SDLLAEMGSDPLEPAGKRDTALQAH\*

>SPBIB\_v1\_150066|ID:27162578| putative Allantoinase [Uncultured spirochete bib]

MIIANVAAALPGERDFHLVDILIKEGKIAWIKEAGSFQRDSRLANEYAAEEMLDAKGLLA  
FPGAIDPHVHFDEPGFTHREDFLHGSAAEARGGVTTVIDMPCTSIPPVTTPHALEGKLSI  
VRDRALVDYAFFGGINGTMLPEEISDVVQSLANRVVGFKCYFISGMDTFPAVNDTQFAAA  
AKACAKEGRPLLLHAEDSNVIAEASQERQSLRGSQAPSWADYYTSRPMEAEIAAVHKALK  
LAGQYTKYLHIVHVGTKAAIAASEKGASCETCAHYLAFDETDFARFGAALKTAPPVKSP  
EQKAILWRLLAEGRLSFVASDHAGAPEYEKFTDNPLTAYGGIPGTGTLFPYLLSEGLFAK  
RLSLERFLEATSGGAARRYGLWQKGSLMPGKDAADFVLVDPDHTTYLDPSHMMSKSSITP  
FAGMRLSGRIEGTFVRGSYVYASVRLAAALRHQANPAFSNEVGMILAKPGFGKFLTWGYR

\*

>SPBIB\_v1\_150067|ID:27162579|ygfK| putative oxidoreductase, Fe-S subunit [Uncultured spirochete bib]

MSKVMKTTSLPALLTRMAGEYLAKRTIFEIPEATWLDVFAQESSESPGITVMSANVSIPLG  
PAAGPHTQIAPNLVAAYLSGARVFELKTVQENDHLDIDKPCIDALDEGHNVWSTELSLD  
QAREEYINAWIAINLLARIFSRKPGDFMFNMSVGYTLDGIKSEKMDAFIEGMRRPEATEY  
WEKAIDQLKAFIEEPIFAEAFGQAALERARPIAEHMPVRPVHSVTLSTMHGCPPDEIERI  
GRYLIEEKGFDTYIKLNPTLLGYNRARVILNQLGWTDIILKPESFSDHLQFDAALALIQS  
LTETAAARGRRFGIKLSNTLANINDGRTLPGAERYMSGRALFPITIHAAKLARALPDFP  
ARFSYCGGVSAFNAADLLKAGLGPLTIATDLLKPGGYQRMAHMVKDVLGALTSVPERPDA  
DALDQLAKDALEAPYYRKEWREGTAAIGRQLPLFDCFAAPCIEACPVHQKAPAYIAATGS  
GDADRGMVILSDNPLPAITGVLCDHVCQEHCSRVDYEGAVRIRDVKLATVRASEAALAA  
EVAPAWPHAPKGTAVIGAGPAGLACAWYLAQYGGQKAVVFDTSVPGGVANFIPSFRIA  
REDIAADIARLEKLGVEFRFGVDVRSAEKKAEGFERIVIASGAHTAREMHLKSGSVRVV  
HALEFLGVCMAKGAEHFAGAKNVLVGGGNTACDAVRMATRIPGVKSVLWSYRRTRKEMP  
ADLEELTNAIEEAKALQHNKAAALFNGGTSNILVELTLPEVMQPGSITLRRMKLAEKDAS  
GRRAPVPTEETFDLPCDLMITAVGEKPDPTFLAAGFIEVKGKGLPAVDEGTMETSVPGIY  
VCGDARRGPSSIIASEADGRAAMAILKNLGIEAASADYRAPAWSSEARASRGKILPSLD  
PGDPGFAAREAERCLACDTACLRCVEVCPNANMVIDTDRLFDQPAQILHIDRLCNECGN  
CGLFCPWNGEPYSGKPTLFDKDDLHNSQAGFAFAGNKARPFLVLRRAEKGGAVLELPYL  
AWSGAISVPAQRPMIALARTIWADHRYLVEVHE\*

>SPBIB\_v1\_150068|ID:27162580|ssnA| putative chlorohydrolase/aminohydrolase [Uncultured spirochete bib]

MILFHNVRILELEPPSVSEPTDVAVYESGEGDRAGTVAAGPNLAVQYPTAKVAGEGGYL

SAGLVCGHTHLYSALARGMLVDIKPSKDFQAQLLDHLWWRLDRAIDPVILRSSALVGCSDA  
LKAGVTSLVDDHSHASPECIDGSLSIIEAIEAVGVGILCYETTDNRNGMAGARASVAENVR  
FAKEIDAIRASGAKPLVEASIGAHASFTVGNETLEALAEAVRSTGRGIHIHLAEDKFDV  
DARHRFGKDPVERIDAVGALNDRSIIHGHWLSPSEVEIMNARGAFLAHNARSNMNNSVG  
YNILLPTFANVVLGTDGGMADMLEEFKFAVFRHRESQGPWWPGDFLKVLRGNALIERHF  
AQDFAPGTTTRASTPAVAPTSTLVTSGEGGFPGFGAVQVGAPADLVLDYDSPTPLVGDNI  
AGHFAFGMSSRSARTVMVAGNVRILDHRPLYDDATIQAEEAREQALRLWKRMEER\*

>SPBIB\_v1\_150069|ID:27162581|ygeY| putative peptidase [Uncultured spirochete bib]  
MDSKKILEKAREYRDYTAQNLSKIIQVPAFSTTEKERIYLLKQLSEEAGMEDLWIDGLGS  
LLGRVKGKSKKIVFDAHIDTVGVGDETQWKLPPFSGLIKDGLVHGRGASDQLGGAASMIT  
AARILKELGYSGDYEVWFSFTAIEEDCDGMCWKYLIEEEKFVPDLAVSTEPTSCRLYRGR  
RGRMEIQIDIKGISCHGSAPERGDSAAKYAARAALAIEKLNRLQPDDEKFLGKGTIVVS  
QIDVHGSPQCAVPDQAMLYCDRRLTWGETDEIAIKQVEDALREAGVNNFTVHMPEYRKP  
WTGTEYHQELYFPTWKIPADHMLVQSGADAYKSLFGKEPVVDKWTFTSTNGVAICGRHKIP  
VIGFGPGDEAQAHAPNETTRIDDLEIAAAFYAALPYMLEAHK\*

>SPBIB\_v1\_150070|ID:27162582| putative threonine synthase [Uncultured spirochete bib]  
MQWLYRCPACGRTYPIEPGRYLCDHCAKEQRPDEPLRGVLECTWEGGNPEPGSVPLPVEE  
RFFPPIPVGQTPLWAPERLRAELSMPLWLKDDTCNPSGSYKDRASWLVAAFARKFGIKE  
IVLASTGNAASSMACIGAAAGIKIKVYVPKSAPIAKRVQILQYGAEIEVDGTYDLAFDQ  
SLAYSNATGMLSRNTAYNPLTIEGKKTASFEIARDLAAGASRSAPRYLAPDHVFPVPTGDG  
VIIAGVIRGFEDLVRLGWIDKMPTIWAQAEGSSAIARALATGRFEAVPSNTIADSISVD  
IPRNGYFALDKLRRHSGRAVVVSDAEILEAQRYLSRASGLFAEPSSACAFAGFLKARAE  
DPNAQVVVMLTGSGLKDIKSAALGVGLKI\*

>SPBIB\_v1\_150071|ID:27162583| conserved protein of unknown function [Uncultured spirochete bib]  
MKSHIEKILLTEKETLLVPLWSKAMESRRQNPIFFDRTSKEILDRIEYDFANLKIPRKT  
AVMLCIRAKKMDYVKEFLASHPTSIVIHLGCGLDSRYMRVDNGEVEWYDLDMPEVIELR  
RKFYEETSRYRMISSSVNNGWISAIASQGLAMVIAEGLFMYLKEEEVKALILALKEAF  
PGCLLVFDAYSVLARSVREHPSIKKTGAVIHWGIDDASAIEQLSEGIRLKEEWYFTQAD  
DIKKLGFGRFALFGIAGLFSAAKKAHRILYYSL\*

>SPBIB\_v1\_150072|ID:27162584| Pyridoxal-5'-phosphate-dependent protein beta subunit [Uncultured spirochete bib]  
MIDLNVNESQRKKNIERCRQKIGILLPTFAQMRDPAKIPESIKKELSNIGLWDVHPRNLF  
VTWHNEPKFEGGGYGPVNYIEIPRAITGTKARIVGLAGKWFPTGAHKVGAAYACLAPELV  
TGRFDPTTKKAVWPSTGNYCRGGAYISRLACPSVAILPAEMSRERFEWLKTIAEEVIAT  
PGCESNVKEIFDKCIELQRTRHDVVIFNQFDQLPNHLWHYAITGPAMEEVFRAIGGQNAH  
VGGVVLSSGSAGTLGSGSYIKEKFPKLA VGEALQCPTILENGFGGHRIEGIGDKHIPW  
IHNFRDTEAAVGVDDDELPMRFIRLFNEPAGRKLLIDAGADPTVVNKLDWLGISGVGNLIA  
AIKFAKYELGEDDIVFTMFTDSMAMYQSRLAELTAERGPYDQRQADRDRYDRLQGLSVDY  
VFEMTHIDKRRAHNLKYFTWIEQLGKDLSELRAQWDDYRTYWGGLHQQADALDRLIEDFN  
AEVLK\*

>SPBIB\_v1\_150073|ID:27162585| 8-oxoguanine deaminase [Uncultured spirochete bib]  
VILLKDCFVAVPADAGADGANSRRRFLAHGVDILLDGNRIAKIAPNIEAPEGATVIDA  
SRHVVPGLVNTHHHFYQTLTRNLPAVQDAKLFDWLVYLVEIWKYLDPEAVYWSSMLAMA  
ELAKTGCTLTTDHHYLYPAGFGGDIPSLQFRAASDIGLRFAPTRGSMRSRKKDGGLPDT  
TVQDEDTILAHSEETLRRFHDPAPDAMRKVALAPCSPFSVSERLMKDSAVLARKYGARLH  
THLAETSDEDDYCVQVYGRRPLQLMQDCDFVGPVWYAHGIFNDEELDFLAKTGTGVAH  
CPSSNMRLGSGICRVHEMLDRGVPVGLAVDGSASNDTSDMLGEARQALLQRIRYGSAGL  
TAGEAMYIATEGGARILGFDQAGTIAEGRADIALFDVMKLEYAGALSDPLAALLFSGYN  
HEVDHLIVGGRQVVRHGMLVSADEEMIRRNALSACERMYRKAGIV\*

>SPBIB\_v1\_150074|ID:27162586|ygeW| conserved hypothetical protein [Uncultured spirochete bib]  
MDKIHSMIQLRAKKIDMAGKDFLLTWEKSSDEIEATFLVADILRAMREQNISPRVFDG  
IAVSNFRDNSTRTRFSFASACDLLGLYVQDLDEGKSQIAHGETVRETANMISFLTEAIGI  
RDDMYLGEGDRYQREVGKALDEGVKAGVLPSPRTVVNLQSDIDHPTQSMADFLHLAHYFG  
GLDKLKGKIVMSWAYSPSYGKPLSVPQGVIGLASRFGMDIVLAHPKGYDLIPDVVELSK  
KQAQASGGSFTYTDSDMDEAFKDADIVPKSWAPYDVMLRRVPLLHAGDKDGLKALEKEAL



ANNAKFQDWECTEEKMKLTKDGKALYMHCLPADITDVSCKAGEVAASVFDYRDDTYREA  
SYKPYIIAAMILGKFRNPASMLESLTARGKQRVYGI\*

>SPBIB\_v1\_150075|ID:27162587| Cation diffusion facilitator family transporter [Uncultured spirochete bib]  
MQRIRTI RLASWIALVGNFILAVTKVLVGFISGSLVLSGDIDSSTDVLIAMTLFAAR  
ISAKPGDKEHPYGHGRAETVASAVIAFVFFAGSQVLVSAIKAILSGERAVMPAPIALWV  
TVFSITGKLALSYSQFHFGKKAGSNMLIANGKNMRGDVVTSVAVLVGLGLAFLTGPVLD  
KILAILVALWIIKNAIGIFLEANTELMGTADRGPYLDFNAISSVPAAGNPHRVLRRI  
GSMLVADLDIEVDPHMTVAQGHDIALAVEAAIKDAMPEIYDVIVHIEPNGNVEKERYGLT  
ASDAGISE\*

>SPBIB\_v1\_150076|ID:27162588| putative Hemin import ATP-binding protein HmuV [Uncultured spirochete bib]  
MKTKLQPIGGIADSATGTATGTEDQATPILQASELSFGWSAERQVLDSISLEIARGQTLA  
ILGPNAGKTTLLSILTGKLAPLRGQVVLEGHPLSDYSARERAWRIAFLPQLEKLPFNFR  
VLDFVLMGRTPHMEALALPGTEDEKAARDALDSLGMASFEERNIGELSGGEFQLVRIARC  
LAQGASILVLDEPVSMLDAPAHARQIADALAGLATVVGKTIITYTTHDIGLGLFLGGRALILA  
QGRVQWEGESSGLRDAEMLARAFGITFSMREMPVSF\*

>SPBIB\_v1\_150077|ID:27162589| Transport system permease protein [Uncultured spirochete bib]  
VSSKVEKEPKGAQGSEGKESGAQRSGQAQLAKGATRSDWALRSGGTARSAWAHRHLS  
ALLVGLLLIVFALALFIGRYPKPGFLNPAALVSDPLARQIVLNSRLPRMLGAVLLGLVLG  
GAGASLQAVFGNPLVDAGFLGVSQGAAFGAVALVLGLRAYSLIAVLAFGMAVLALALS  
WLAERFRYGGQILRLLAGLAVSAFFSLLAMMKYVADPLSQLPDIVFWTMGSMVPMGWK  
RLESSAPIALAALAVLYAMRWRVNLSSLDDTVSHSLGIRPGVERKIVSVAAGVGMVTA  
VCGVVGWVGLVVPQIVRAIDGPDGRSVLPRSM LGGAIFVLVSDTLARSLFSGEIPLGIVT  
SLFGALSFAILLTMRKVELAR\*

>SPBIB\_v1\_150078|ID:27162590| putative Periplasmic binding protein [Uncultured spirochete bib]  
MKRYKLFLLTALFLVAAFGAFAQQRIVLGGRAVPMLADAVYLFPKTSSRVVAFASDQGL  
GIFMSAIDPDFKSKERFDKSAGAEVYASFKPDVLILKSMMNQLKAPLDALGIPQLYLNL  
ETPEQYYEDIATLGKVLGNEKRASEVVSWFASHEASIVSRTSKIEPAKRPKVLIMQLAVS  
GESVWQVPPDSWIQTIMAERAGGQAVWKGANPGSGWATVSIEQIAAWNPDFVFIISYSGN  
SSGAAEAFKDLRLSALKAVRNGSVYGFPLDFYSWDQPDTRWILGFTWLAKRVHPELFD  
ISVARTTREFFSFMYGFDDAMFRTIIQPKIAGDLGEQF\*

>SPBIB\_v1\_150079|ID:27162591| putative ABC transporter, transmembrane region:ABC transporter related  
[Uncultured spirochete bib]  
MNASKRTQGRGQAAGKGLQGSATKAKKARANRSNTAASPSTAKSGPLSHIRWIREVWREK  
QGLIWLLLFLTLLSSAVAVAFPLLTQKLFLLERAIDTHMNKGAAMAQVKRIALYFVAIG  
LAGFVAGTFPGIRGALNMVFDYIVRKRYFSEVMQKDIRFFSYFRSGDVITRLTSDISDFP  
KLSWFLCSGIFRAVESASKVTFCIAAMLSLDWRLALASLASLPIMLLVFTRTQSAIYDRV  
NKNEQAISAINNQLMSFSGVKVIKAFASEEKYTRFFDDALARRFETEMGVIKLETILQL  
IYQYIDYVAQVALVFGGLMVTRRTISIGTFYAFYNYLNM LIYPVLDIPQLFVFGKRAFV  
NIDRLEEMRRYATESAAAEGA VPEGSLQKSTLAETEMEGAQNPPSQHASKPAPLPVSPA  
AWLTRLQSLRFEKATVYYERKHKPAIAEIGVEVRAGDKILVIGPVGSGKTTLIK TALGLL  
EPRSGRVLLNGRPVRELGPLERRGLVGYVPQDPLLFSGTIRENILLGLKEGQTL SQLEME  
RILEVSRLSDELA AFPEGLETRLGQRGTSVSGGQKQRIAIARALAGYPSLLLLDDMTASL  
DTNNEEALWKSLAEMPEFTRA AVIAVSHRLSSIQYVDRVLFLKNGRIAGFGTHAELMAEN  
AGYREFVAEHVQMPGA\*

>SPBIB\_v1\_150080|ID:27162592| Xenobiotic-transporting ATPase [Uncultured spirochete bib]  
MANQLMTNQPAKNDYLR TILSYLSRYRMLALPGIGVMILIAMGQLAGPYILKQIIDVAVP  
KEDTSLLLGYAFVAVSVTGALS YVGMMLLARLGLSIVTLIKQDIFSHLLKLPASFFD  
SHPVGELMSRTETDTERVRDMFSNLGANLIVNVL TMLGIFAVTFALVPKLALIMFGVSVT  
LLAVMIVFFSKIFPMYEKARSLYAGIAAKVAEFVQGIEVLKAYGRTGWAEAQLDAAAKQK  
VALDVRISLIEYSMMSALNALIGPLFIVALLLLYAPKVLAGTMTLGMILLFVEYGARLLR  
PIAEIAESLRSMQQARTSLSRIRKLMATEEEPNRGTGKAPSLQHEIRFDHVWFAYNDEDW  
VLRDLTFTIPKGSFAAIVGASGSGKSTTIGLICGFMHPQKGCIRIDGTPLDEIDIVAWRK  
KIGLVLQEAYLFPGSVLENTLYHDEIDEKTVWSAISMVHANEIDSLEGLSTNLWERG  
GNLSSGERQLISFARALTMNPELILLDEATSNVDMATEKRIKESMEVLRKGR TMVVVAHR

LSSILKANTIFFLSEGRLIAQGSHESLYENLLEYRQLVDQQFPAGKGGRA\*  
>SPBIB\_v1\_150081|ID:27162593| protein of unknown function [Uncultured spirochete bib]  
LPECRKARYNISVWHFRTFYRRYAKNYTEKLGLLTFYQGQSTYDQSTSKK\*  
>SPBIB\_v1\_150082|ID:27162594|fucI| L-fucose isomerase [Uncultured spirochete bib]  
MAENKDFEMQQARNRLKGSAPKIGIRPTIDGRLGGVRESLEAVTMGMAKAAAKLISENLR  
HPTGEKVECVIADTTIGGVAEAAACA EKFAREGVA VTLT VTPCW CYGSETMDTDPLTIKA  
VWGFNGTDRPGAVYLA AVLA AHSQMGLPAFGIYGHVQDLTDTDKIPADVAEKILRFAKA  
GLAAAWMRGKSYLSVGSVSMGIAGSIVNPDFFREYLGMRNEYVDMSEITRIEIKIYSEA  
EFRRAMEWVKTYCKEGPDNNPPEKQHSRARKDRVWEMSVKMAMIVRDL MVGNPDLRRKGL  
GEEALGHNAIAGFQGRQWTDHFPNGDFLETILNSSFDWNGIRQPYLVATENDSLNGVS  
MLFGHLLTGSAQIFSDVRTYWSPEAVQRVTGWKPTGLAEHGFHILNSGATCLDGTGCQR  
LDGKPAIKPWWQVEANEAKACL DATQWRYANLGYFRGGGYSSDFLTEGGMPVTMTRINLV  
KGLGPMIQIAEGYTATLPQEVHDTLDR TDPTWPTTWFV PRLTGTGPFKDVYSVMASWGA  
NHGAISYGHIGADLISLAAALRIPVAMHNIPQEKIFRPSYWN AFGMDPEGADYRACAALG  
PLYR\*  
>SPBIB\_v1\_150083|ID:27162595| Transcriptional regulator, LacI family [Uncultured spirochete bib]  
MARETVTIRNVAQRANVSTATVSRVLNNDPRVRYETKQVVLEAMESLGYKLNIVARSLKT  
SRHTHTIGVLAPDLAGDFFMFIAESMNRELTLHGYSLVVSTSRDSEEEEEAKRIRHLAERLV  
DGIVLIPVGSSSAYLSQVSALHIPVFDRALEGFESDQVLVDNEGGA YEAVCALIGEGH  
RRIGFLGGKPEVTTAKERFAGYCRAMEEAGLEIEQKYVRFHGPTLPFGYRTMEEIHKDPD  
SPDTWFIVNLF AHLGATS YLVTEGGERAQHITFAAFDEMPYSPLLR YCRYAVQQPIAEMG  
KAAANLIIDRIEGKGPPEPQILRFTRLIQHPLVR\*  
>SPBIB\_v1\_150084|ID:27162596| Auxin Efflux Carrier [Uncultured spirochete bib]  
MEQASGSLFSIAILMTAGYMLAKRGWLGERAIDGLKKIITNLTLPLLLLRAFLRLTPDGR  
NVILALGVFASCAIMGLAGALLAGIARLPRPETRLLFQGF EAGMLGYALFAGFHTAERLP  
AFAALDMGQVIYVFTVLMVQMSMRPEGEQGASKTAVFPWWDI AKSKVLWAIGAGIVLSLL  
TPGFADMLAVRSGFAGAVFDTVGG LTTPLVCLVIGSSLSTGIVFDRDLLRVVAFRAVLGL  
GLGLVFAYLIVPALGFSEWHSRAAIVL FVLPPPFI PVYHKGKANFVSSVLTSTVVSIA  
LIAVLAIAGVA\*  
>SPBIB\_v1\_150085|ID:27162597|fucU| L-fucose mutarotase [Uncultured spirochete bib]  
MLIGIKPCISAELLSVLYRMGHGDEIVLADAFFGGDALNARVIRADGIRIPDLLDGILRL  
INLDSYVEAPVIMMQPSVGDVLDPEVERHYREVIDRYWPDTPPIARLERFAFYERTKKAF  
AVVMTGETVKYANIILKKGVPVSD\*  
>SPBIB\_v1\_150086|ID:27162598| PfkB domain protein [Uncultured spirochete bib]  
MIVACGESLIDMVP AEHGSKLFEACPGGCPYNSAIAAARLGAPTWFLGKTSRDFLGDTIV  
SKLVDSGVDVSLARS DQAVTLAFVERDQAGNAKYAFYSADAADRFFLPSDIPAKLPDSA  
VFLLVGSISLVQEPCSTILALIEREHERKLISFDPNVRPNLISSKSEYRARFEWICRRS  
AIVKASDSDLEWL YECPANEAA NKVLGLGPELVALTRGEHGLALTKQVRIELAAAKVAV  
VDTIGAGDSFHAGLLAALGWLKVDRKDLASLSEQNLSAALRLATSVAALDCTKRGA EPP  
TLHELAVFDPEAVLIAPGIVPQFNAKERIC\*  
>SPBIB\_v1\_150087|ID:27162599| ABC sugar transporter, periplasmic ligand binding protein [Uncultured spirochete  
bib]  
MKKRTVILALALMLVAAASLAAQTYIPLISKGFQH QFWQAVKEGALKA AKDFNVNITFE  
GPESEAMVDKQIDMLAAALAKKPNALGFAALDSKAAIPYLQQA KAAGIPVIAFDSGVSDS  
IPLTTCATDNVAAAAYAADKMAELIGGAGEVA VIVHDQTSRTGIDRRDGFVNRIKSKYPK  
ITIVSVQYGAGDHLKSTDLAKAIIQAHPNLKGF FGANEGSAIGVLNGVKEMGKIGKIVVI  
GYDSGAQQIAAIRSGEMAGAITQNPV GIGYKTVEYAVKALKGEKFPKFIDTGFYWDKTN  
IDDPKIKAVLYQ\*  
>SPBIB\_v1\_150088|ID:27162600|rbsC| D-ribose transporter subunit ; membrane component of ABC superfamily  
[Uncultured spirochete bib]  
MADKSNGT PAIASIAKITAGTKGAAARQKILAFSSLVLLIIAFSLLSPNFFQPYNLIAIM  
LATAVNGVLAIGVTFVIITGGIDLSVGTMMTFTA VMAAQTVAVWNLPVILGVLMA LFVGT  
ICGLASGVMI AKFKLPPFIATLGMSMLTKGLSLIIAKSKPIYFTNAPSFAKISMGSLPFP  
MKDFQIPNAV IILFGLAILASFVLNSTIFGRYTFAIGSNEEAVRLSGINTDRWKIAVYAV

NGLICGIAGILIASRLNSAQPALGQGYELDAIAAAVIGGTSLSGGEGTILGTIIGAFIMS  
TLTNGLRILSVPQEWQIVTTGIIIFAVYVDMLRKRR\*

>SPBIB\_v1\_150089|ID:27162601|rbsA| fused D-ribose transporter subunits of ABC superfamily: ATP-binding components [Uncultured spirochete bib]

VAEPIIVVRNLSKAFPGVQALKDVPQFDLYPGEVHTLVGENGAGKSTLMKILSGVYQRDTG  
EILINGKPAEIHNPRAAQKLGISIIHQELNLMNHLTAAQNIYIGREPRKPGGFVLDEKAL  
NAQARKLFETLRMDFDPRVKVGELTIAKQQMVEIVKALSFNARVLMDEPTAALNETEVE  
ELFDIIRHLRSQGVGIIYISHRMDELFRISDRITVLRDGGQYMGTFRASETNLQIPLMV  
GRKIDETARRIPEGKLGEEVVRNLRNLRGRLVRNVSNVRKGEILGFAGLMGAGRTETAR  
AVFGADPIDSGEIVKGGKVVIRHPRDAVRHGIGYLSERDRKRYGLAVGMDVLDNICMTDL  
PTFMNAMGVLRPKMQAAAEKQVETLSIKTPSLMQKVKFLSGGNQKVVVAKWLVKNCDV  
LFFDEPTRGIDVGAKQEIYLLNKLASLGKAVVMISSELPEILRMSDRIIVMCEGRITGE  
LDGARATEEEIMKLATQRETVMKTA\*

>SPBIB\_v1\_150090|ID:27162602| Transcriptional regulator, DeoR family [Uncultured spirochete bib]

MLYDLSDRERAILLELADRYSVSEFSSILGVSEVTIRGDLSALEEKGYLLRSRGGAI  
AIHRNIIERQKLHVAEKQKIARKAAELVHDGDRIMIEAGTTTALITRYLVGKQDVQIVTN  
SMLAFSYARVNPQINLITGGSFRRRETESLVGPVAVQSLGSFNARLAFVGTGDFSLARGM  
TTQLTEGAEIVRAMSKRAEITWLIADSSKFDKIGFVSVLPLQAVHGIITDAGLSQEAVQA  
LQAEGLEILLA\*

>SPBIB\_v1\_150091|ID:27162603|acoC| TPP-dependent acetoin dehydrogenase complex [Uncultured spirochete bib]

MATTIIMPKLGNTVESSVILSWKVKPGDAVKADTVLCEIETDKATMDVPAGLEGTVLALL  
HKEGDDVPVLEPIAVIGAPGEPIGEPTPEKKSSSESEPAQAQTARPAQPSLADHSAPTAEPA  
VAEKHASPRARQAMFQLGVDIEAIPLGSGPQGRIIERDVIAASFAEPKAADGIASQTTQA  
AAQEAQPATAAQPAAPAGQSPTQPAQEYETISLIGIRKRIANRMRESIQTTAQYTEH  
GSADAERLLALARLKAQKNPELSGITIGDLVLAAVIKVLPEFPEFNAHLEEGTLKLYKP  
IHLGVAVDTPKGLMVPVVRNAQALSLSALSKEVKRLAQACQNGTIDPDSLSGSTFTVTNL  
GAYGIEQFTPVINAPETAAILGVCAIRPALIQKEKGIETRMRIGLSLTADHQVIDGAYAAR  
FLARLAEVITDIDFLFMSF\*

>SPBIB\_v1\_150092|ID:27162604|lpdA| Dihydrolipoyl dehydrogenase [Uncultured spirochete bib]

MAHYDVAILGGGPGGYLAAERLAEHLRVALIEKGDIGGTCLNIGCIPTKTLNSAKLYT  
HAKESSPFIETEGVRVNWQRTLEWKNEVVTRLRRSLELTLKKAGVEIVRGSGLTGAKT  
IEVRPETKNQKALSEPAGTASANLASADLAPTGPLQLEADQIIIATGSSPILPPIPTAG  
NPAIKDSTGLLSLSEIPQKLCIIGGGVIGVEFASLFSALGSMVTVIEMMDEIVPVMDPQM  
AMMLRNALKQVTFLRSTKVTAVNGNKVEYQTKTGEQGSVEADIVLMSVGRKANIEGWGAQ  
EAGLEIKNRSIATDEHMRTNLPGVWAIGDVTGKSQLAHAA YRMAEVAVADILARRTGQHG  
PQIFVPETVPWALYSMPAAAGVGYTESEAKAKGYEIEVIRSPYGVSGRFIAENGFSAPGS  
IKIIMEKDSQRLGIIHLLGPYASEHIWGLALALERRLPWSALQNMVFPHTVSEVIREAA  
WNAHK\*

>SPBIB\_v1\_150093|ID:27162605| Pyruvate dehydrogenase (Acetyl-transferring) [Uncultured spirochete bib]

MPKSLPVEPSQVRKSGTLKIPEIPLNQYTRNIDVERARFGNEGLRAILHDMIIVREFETM  
LNSLKTMGAWEGIEYNHKGPAHLSIGQEA AVVGQAAALDPEDFIFGSHRSHGEILSKCLS  
AARKLDEPRLQSVMTSWLDGETLEFAKRMPHSDTFSLARNFIVFGTLAEIFARKAGFNRG  
MGGSMHAFFTPFGSMPNNAIVGGSADIALGSALFKRINKKPGIVIANIGDASMGC GPVWE  
AMMMASMDQYRTLWPESAGGAPPILFNFFNIFYGMGGQTYGETMGFGV LARAGAGVNPEA  
MHAERVDGLDPLAVADAVLRKKKILLEGKGPVLLDTITYRISGHSPSDASSYRTKEEIEE  
WQKNDSIAELSQYLLKHSIIESEDLAAMRNEIHSTIFEAVKLATNESACPRADGKFIESV  
MYSNKKILKLEDREPEVLQAGEDNPRVQAIARRARYAFDADGKALPKNKVYQFRDGFIEA  
LLYHFKADPTLAAWGEENRDWGGAFAVYRGLTEALPYPRLFNSSISEGAIVGSGVGYALS  
GGRAVVELMYCDLGRAGDEIFNQASKWQAMSAGVLKMPLVIRV SIGNKYGAQHSQDWSA  
LVAHIPGLKVYFPATPYDAKGMMLHALSGTDPVVFLESQLLYDIGEQFEKDGVPQGYEL  
LEGKPAVRKPGKDLTIATYGATLYRALEAARILEEKYGISTEVMDLRFLAPFDYEPLIES  
VRKTGRLVLASDAVERGSFLHTIASNVQTLAFDWLDAPVAVVGSRNWITPAAEMESIYFP  
QPQWIVDTVHERVLPPLPGHTPSSVQTAQDIARRYRAGV\*

>SPBIB\_v1\_150094|ID:27162606| conserved protein of unknown function [Uncultured spirochete bib]

VQPDYPRIDIKIAESIIADPARSPGERLEALSAIARAMGLRLQTGPARRPPARSGESNNH  
IHTCYSFSPYTPAGAALAARRAGLDVAGSVDHDSYAAAGEMRAACAMLDLGVVTGFELRV  
SLKAAAHEFPEATARLLTERKLNPNDSAGIYMTIQGVPASARAEVEAFLEPVRSARYAR  
TERMVERANALLSSFGLPSINFKNNDIVDRSKFAEGGTITERHLLAAVSRSMLSAMQGP  
LVDWLEAKLGLALSASQRRLLSDPENPFIMYDLLGSLKAGFLDRIFIQPDDEECVDRDAI  
ALARRIGAIAYA YLGDVAESPTGDKKAEKFEDEVLDELMPALKELGFPAITYMPPRNTK  
AQLSRLQKLCAQYDFMEISGVNDINQPRQSFRCPELLEPEFRHLDDATWAMVAHEALSSID  
RRFAFFANDNPFARLPKERISLYSKAGREIDFADPYSLERITNSLLKEKFL\*

>SPBIB\_v1\_150095|ID:27162607| putative Sorbitol-6-phosphate 2-dehydrogenase [Uncultured spirochete bib]  
MKIKVTPSAIPIVRGLMLSASFSCMVKTRPESFACPGERTNESADGPIDRRPEERAEE  
HIRLVLDGILPQSEIEDAELAQALQHSLTQPQAQAIRRQLRIGDVCLDIMGAAGASIAL  
DLVPLEPLDRRYQMMVQSPGDASLLSSASRASVVRGKIALVTGGAQGGFAEIARGLAHS  
AVVWIADINLPAAQSFQTLSSSETGTPSAFAIDIDVSSEASVQRAFEIIALTTGGLDLVI  
SNAGILKAGSLLTQPVQEFRLVNEVNYVGGFNIAQHAARLLRLQWLGAPDWFTDIIQINS  
KSGLQGSNKNSAYAGSKFGSIGLVQSFALVEYRIKVNACPGNFFDGPLWSDPQRGLF  
VQYLNSGKVPGARTIEDVRAFYESKVPMGRGCYGPDLKAIYYLVEQVYETGQALPVTGG  
QVMLN\*

>SPBIB\_v1\_150096|ID:27162608| Carbohydrate kinase, FGGY [Uncultured spirochete bib]  
MTDAIAVLDIGMTNKKVLYSTELALLDEKRVFAPLMLDGLETHDLAAMERWFLSTLRE  
YSQRFHIKAIAVSTHGATFVCTDSEGNPAPCIYYTHEPSQDFHERFFALAGERKMLQAT  
TGTPDFSALINPAKGLFFLNERYPKFTSARWVLSYPQYWGMRLTGKPSAEGTYIGCHTF  
LFDWERGTYSVADALGIRDKLSLPIGQAWEVLTGKPEIAQQTGLPPDTIVTLGIHDSN  
ASILPHLASAAGRDFVLNSTGTWCVLMHPVEKYGFEPDELGKVFFNRSANWNTPIKTAIF  
LGGKEYEAWIQIISLQGHASKDLPAQTQEDYQRLKEQRYFILPEIVPGSGQFPFSIAR  
AVENGKVFLSEIEQGRDVPVFLKEPRIGQAVLNLIVLQTEVALQRTGLAEGAEILTEG  
GFRNNSDYNRLLASAFPENSIYLTDLKEATSFGTAMTALAALNHIDPKELTRFIHIEKAL  
VAPMLPSETLGAYRNAWHARMQKI\*

>SPBIB\_v1\_150097|ID:27162609|yggP| putative dehydrogenase [Uncultured spirochete bib]  
MKTKAVRLYGVNDLRLEEFDLPPIKDDEILARVSDSICMSSHKLAMQGDKHKRVRAPLA  
QNPVIIGHEFCGEIVEVGKKWAHKFKPGMPFAIQPALNYKGTLWAPGYSYQYIGGDATYI  
IIPNEVMEMDCLEEKADAFFMGSLEPVSCIIGAYHAQYHTKPGSYVHEMGIREGGSLA  
LLASVGMGLGAIYAIHGGKRKPARIVVTDIDQARLDRAQTLITVESARQKGIELIYINT  
KDMADPVAALRELNGGKLFDDVVFAPVRSLVEMADKLLANDGCLNFFAGPTDPNFSAML  
NFYNVHYESHHLVGTSGGNTDDIRESLALMAQGLLRPEAMITHVGGNAVAETTINLDKI  
PGGKKLIYTHKKLDLVAIADFAERGKTEPFYAALAEITARHQGLWCKEAEDYLLANAPEI  
\*

>SPBIB\_v1\_150098|ID:27162610|yugJ| putative NADH-dependent butanol dehydrogenase 1 [Uncultured spirochete bib]  
MDEFVFNPTTIYFGKRYEAEVGRIAAQYGKRVLLHFGGSAERTGLLPAIRKALTEAGI  
SYFELGGVQPNPRLSLVYKGIELCRKNSVDLILAVGGGSAIDSAKAIAGTVYEGDVWDF  
YTGKAFPTKALPVGTVLTIPAAGSEASPGSVITKEEGLLKRAVNADCIFPRFSILNPERA  
FTLPPAQIANGVTDIMCHLMERYFTNSKPVEFTDRLIEATLRTVIAAAPRVLANPTS YDD  
WAELMWAGTVAHNELLNTGRVGDWASHDIEHELSAIYDIAHGAGLAIVTPAWMKYTLKHD  
VARFAQYAVRVWGVEDNYFDPERVAREGIARLEVFWRSIGQKVRLSEIGIDDSRIAEMAR  
KCTDDDAHTVGHFVPLRSKDIEAIYRLAL\*

>SPBIB\_v1\_150099|ID:27162611| Argininosuccinate lyase [Uncultured spirochete bib]  
MATLWQVGGGEGLDPAVDRFLSSLAVDARLVFEDIECSQAHAIMLGEQGIIPQVDASALV  
DELA KIRKDLQSGALAVDQSAEDVHSFLEAELTRRLGDIGKSIHAGRSRNDQVAAAFKLH  
VRNACRQTRARVLDASACLVAERNIETLMPGYTHLQRAQHVTLAHHVLAWCAALERDA  
DRFADAATRANESPLGAGALAGSGLSVDRETAELIGFSRVSMNTMDAVADRDAIEYAA  
SAATLMMHLSRACEDIVLWASSEYSFVKISPRASTGSSIMPQKRNPDPaelIRGKAGR VF  
GNLQALLVMEKGLPYAYNRDLQEDKALFFEIEETINGALEAFKVLVQSIEPDAGRMRAL  
DEGYLEATDVAEFLVKAGVPFRTA YQAAKLLVQRCVDEQKSLRAITQADLAVHEAFEKAG  
ANAAELAEYLEPQACVARRMQTGGPAPLRTREQIDRLRAWLHLATR\*

>SPBIB\_v1\_150100|ID:27162612|argG| Argininosuccinate synthase [Uncultured spirochete bib]  
MKKKIVLAYSGGLDTTVIVPWLKENYDCEVIAVCGDVGQEAADFDAIGKRAIASGASKFIK  
LDQKEEFVKEYLWALVKAGTPYEKKYLLGTSAAARPLAKGLAEVALAEGADAVAHGCTGK  
GNDQVRFELGVKAFAPEMEVIAPWRIWDIQSREEEIAYLEARGIPVPMKKS SDSYSRDDNL  
WHISHEGLDLEDPANEPHFEGMLKMCVTPEKAPDKPEYVTIGFQNGVVPVSVNGEKLDPVS  
IVSKLNKIGGANGIGIADMVENRVVGMKSRGVYETPGGTIIMEAHDRLEMLCLDKKTLSTF  
KMTVAQRFAEILYEGEWFSP LCKALCAFVDSTQSTVTGQVTLKLYKGNIFAGATSPYSL  
YDASLASFTTGPLFSHKDSTGFINLFLPTKVRARLNERIKKDG LAAGPDVVKPGSSGYT  
APAGD\*

>SPBIB\_v1\_150101|ID:27162613| protein of unknown function [Uncultured spirochete bib]  
MKNTISCDFMQVYLNYYVIKQRAFKKERPGLVSWSCGPVSLAGQRLFLFFAFLS\*

>SPBIB\_v1\_150102|ID:27162614| putative tagatose-6-phosphate kinase (Phosphotagatokinase) [Uncultured spirochete bib]

MLQNSNISRTSIEAGGQNQDNQEQESHNQNSQIQDGHSSAGPREPSFLCVCLNPTIQKTL  
VFSKIHAGEVNRTAQWRIDVAGKGIPTRIFTQLGERAVHLTQLGGPNRDWFLSMCAEDQ  
IPIEWWESDAPIRFCTT LIEESEGHATELVEESHVPVAPGTSEAIARFSELVQKTSAVLL  
SGTVATGIVPGTMARLAEIASKAGARLYLDIKKQDLLECFHPLCVKPNLEELAQTGLI  
PYDEVREETTARRLVAETGRKFYERFGTYLVVTRGAKSTLYWDGRQLCEQPVPNPVNRNP  
IGSGDAFGAGLARILERGGSIHDAVKEGTRLGGLNAAQLKPGSIFP\*

>SPBIB\_v1\_150103|ID:27162615| Sodium:dicarboxylate symporter [Uncultured spirochete bib]  
MVEEKKKGVLDWYFKTNLLARILIGLILGAI VGIILGFFPSSVKPFVDNSKFFGDLFIRL  
LKMIVVPVVLFSLVAGAASIAPSRLGRVGVKILVYYLLTSAFAVLIGLIFANIFQPGAGF  
NVVGDAAIKKEATAPTLVQILLNIVPTNPFESLMKGDVLP IIFFAVVFGIGLSYIKDSK  
QQALAKSGTVLLDGVNAAAETMYKVVRGIMQYAPIGVFV LIAQVFAQQGPKAIGPLLMVT  
LAVYVALIVHLVVTYGGLLSVYKLGFWKFLKGANEAMITAFVSRSSSATLPVTMRCSEEN  
LGIPRSISSFTLPLGATINMDGTAIYLGVCAMFIGFATNQPLTINQQLTVIITATLASIG  
TAGVPGAGAIMLLMVLESIGLKVTEGSAVAAAYAMILGIDALLDMGR TSLNVTGDMVGS  
IVAKTEKELDMAKWK\*

>SPBIB\_v1\_150104|ID:27162616| Aspartate racemase [Uncultured spirochete bib]  
MKRGTIGILGGMGPDATAAFFSMLVRLDVAPRDQDHLHIIVDS DPSIPDRTRHLLEGGEN  
PLPVMLSSARLLAAGADVAGMPCMTAHAFLPNLRRNCTLRILSAFEETSKALDSFT PPI  
RALGILGTIGTKQTRLFETAMPDKTILWPDEDTHRAKVMEAIYGKNGIKAGNLGEEPHQL  
LIQAAHRLIAQGADAI VAGCTEVPLVLSQRDFEMPFI DPMEYLARALIVA AKGVYSDHQS  
K\*

>SPBIB\_v1\_150105|ID:27162617| Cupin 2 conserved barrel domain protein [Uncultured spirochete bib]  
VIIRANERTFETRHEMRGGKGDVSLAMLSNEALAPHLR LRFSEL TIPPEAGIGTHTHSGET  
EYFFIIIEGNATVNDNGVTTIVHPGDVLITGGGALHN IENHTAEPVRLVAVIVTEA\*

>SPBIB\_v1\_150106|ID:27162618| Ring-hydroxylating dioxygenase, large terminal subunit [Uncultured spirochete bib]  
MIPNQWYVIASSNEVG I KPVGMTRFGEKLVLYRTASGFLVCLSDMCAHRGAALSLGKVCN  
GDQIQCPFHGLE YDPSGKCMVIPANGRSTP VPSNFRVRSWPVYEAHGFIWVWYGSEPTP  
EIPEFFDDIPKDAKYATVADHWKAHYSRV IENQLDCVHLPFVHYNTIGRGNRTL VNGPAV  
EWVSDHKFFMYVYNETDNGQKPKKPDEVPMPSPNGYKIEFLFPNLWENRIADKVRVLA AF  
VPVDEENTLLYLRFYQAFARIP IIGTLIARAAMPFN VYVAHQDRRVVQTQVPKASGLKIG  
ENLFQGDLP ILEYRKKRQQLQESARPR\*

>SPBIB\_v1\_150107|ID:27162619| conserved protein of unknown function [Uncultured spirochete bib]  
MLFRDRCDGKRITGQH ALNALMPYMMRGRNESAVYYGREINIENALAYLKL I KKAQADTE  
AQERFTL FSLILTAALKTIALY PRLNRFVHRRALYQRKHIAFSFIVKQRFDHDAPEVNAK  
VFFDPEDSFETVSMKINAAILDAREHGEGDGERFANIFHRIPGGKALIMGVYRILEYFNI  
APWSLIRMDPLYSS IYIANLGSIGLNAPFHHL YEWGNTSIFMVIGKIFSKELWHGATRTR  
QRYIDL RVTLDERIADGLIFAEAA SVFSRLLS SPDLLNLSIEELKQALS\*

>SPBIB\_v1\_150108|ID:27162620| Type I antifreeze protein (modular protein) [Uncultured spirochete bib]  
VRLFTFLRFIAIFCIYFIYIFSLREVIAMPTYEYECRVCSYTFEAFQSINDDPIKTCPLC  
GGEVKRLIGGGTG VIFKGS GFYITDSKKSSSASTSAKKSASSESSGSSAGCGAGCACSP  
AKESA\*

>SPBIB\_v1\_150109|ID:27162621| protein of unknown function [Uncultured spirochete bib]  
LAGEQAHPAPQPALLPELSLEDADFFALVDAEEDFFESVI\*

>SPBIB\_v1\_150110|ID:27162622|kb| glycine C-acetyltransferase [Uncultured spirochete bib]  
MYGTFKDELAKKLEAIKAEGLYKDERVIITPQGA AIRVADGKEVLNFCANNYLGLSNDPR  
IRAAAVEAMERFGYGLSSVRFICGTQSQHKDLERKIADFLGMEDAILFSSCFDANGAVFE  
PLLDEESAIIITDSL NHASIIDGVRLCKAKRWYKHADM RDVEEIDPETGKPLKGLERCLK  
EAQGS HVIMIATDGVFSMDGDIANLNAICDLAEKYGALVMVDDSHATGFMGVHGRGTWEY  
CNVAGRVDIITTTFGKALGGASGGVIAARKEIVEYMRQKGRPYLFSNTLAPAIVGGTLKA  
IEILTESTELRDRLESNTALFRRLMTEAGFDIRPGEHPICPVMLYDEKLAHRMADALLDE  
GIYVIGFSFPVPRGKARIRVQISAGHSEAQIRKA VDAFKKIGKRLGVI\*

>SPBIB\_v1\_150111|ID:27162623| Rhomboid family protein [Uncultured spirochete bib]  
MRIRYNAPVTLTFTLLAAIVLVLSQTIAPSLIPTVFSTPAPFHSNAFVDYLKLFTHVLGH  
ANIQHFIGNFTMILLGPILESVYGSFLLLSILITALATGLANTILFPNVVLLGASGVV  
FMMIMLSSITNFSKGEVPLTFILIMIVYLGQVWDALTKQDNISQFSHIIGGLVGSFLGF  
YRKK\*

>SPBIB\_v1\_150112|ID:27162624|exoA| Exodeoxyribonuclease [Uncultured spirochete bib]  
MVKIYSWNVNGIRACAQKGFLEWIAASDADFVCVQEIKLQGDQLTEELRHPVAGSGKRYH  
SFWAFAERKGYSGTGIYALREPVSVSGMGGQEFDSEGRTVVADYGGFVLVSAYFPNSQEA  
GMRLDYKLR YCDSMLDFCERMRRARGKHVIVAGDYNIAHKPIDLARPEQNEGNAGYLPEER  
AWMDRFTAAGYIDTFRWFCKEPGHYSWWSYRAPKAREKNIGWRLDYHCVDPEFAPALSAA  
GIHPEVMGSDHPCVSLFLDV\*

>SPBIB\_v1\_150113|ID:27162625| putative ROK family protein [Uncultured spirochete bib]  
MTHEEQHPERAHLIRERNQRLVLR LIFRTGILS QSKAVQRTGLKAPT VFRIFSDLEREG  
IEAVSEPPSRSPKNRKKGRRPVNYRIRSSAA YVVGIDFWARSAAAIQDFAGNLVAERGV  
CFASPPSAEDALDIANLIRDMLVESSIDRSKLLGIGV GAGPSVSVSSGVVQFYARIPGM  
NEFPLGERLRLSFSVPVIVTNNASIVALAEERYGQARGVSSLFLFLVRAGVGGAFIQNGK  
LVSDRSRTAFEVGHLSIDPSGLACSCGNRGCELYLNEETVCTALSQIEPCAGIEDAERI  
LSANNPEVDAALKPILEISAHAVRDIRLLAPEAVLIVTRSKSLSEHIAQAASADFERND  
QRFGPPGARI IASEYNPVLACKAACDLVYEEYFAHGFGEGSGFPGGGFMGGSQQRSAGQQ  
PSGAQAE\*

>SPBIB\_v1\_150114|ID:27162626| protein of unknown function [Uncultured spirochete bib]  
MNQEF EKNSALFFGSTRYVQPRWRAMPAQQKFSHSLNEESDRYVHALAKLEQEDEEIP  
SDRGPIVFRDGLFQIDMSQIEEKGDIDIELKKLIDSIIGE\*

>SPBIB\_v1\_150115|ID:27162627| putative ATP-dependent helicase YoaA [Uncultured spirochete bib]  
MGKKQTAIVDAVQRFTTQAQQELKNAISDMEGREVF AIGALDSRGLIKKLEILARGSEGA  
VPAPFRDRDSAQVLIHNHPSGELFPSDADVLVAEAAADGLGSYVDNAVAKVLVVAEPV  
RAKLIRPLNPDEIAAVLDDGGKLSLKMPEFEPRTS QVDMARDVAALISDGGILIAEAGTG  
VGKSFAYLIPSLAWAIGNNERVVVSTATINLQQQIFK KDFPVVSSLFKKPAKAAVVKGRG  
NYLCKRRLYEAIEEDALFSDTSIKLRQILEWDNNGGSGDKSDLSLPDDDPIWNRVCS  
ESDYCLSSRCPYHEKCHVVRVRLEAASAQLIIVNHVLLADLEAKRTREGVLNTILPSYKALV  
LDEAHAIESSATSLFSESFSKRSIQRLLGRLVRKKKRTQTGILPSLRRLPDIPAALLDTA  
SKQADAAAAAADAFNASALASYPEKESLLIKNLESFSRSAFLSALQSLERDLAMLVTRL  
GEILEAMPPEFEDEESVVELKLT SRSIEEAAALVPRFKNPDAEPQTIFWMQIDRKNPREA  
VVICTATPLEVAPLLAERLFSKVRTCICTSATLTINNSFDWWRNRVGLPTKKDGETSKAM  
STMGATAGTTEGAIDAPIRNRQYPSFPYRRNALLAIDTSAPPPDGTQFQAYLNTAVARL  
LHASRGRALVLFTSHKALRDYDYVAPLLEKEGILALRQGQKDRYSLLHTFINDISSVLF  
ATESFWEGVDAPGETLSLVIITKLPFRVPTDPIQASRAA AIDARGGNSFAEMSIPEAVIL  
FKQGFGRLIRHSNDRGVVAVL DVRIA KKA YGNLFISSLPECKLETGPLDQLCTSVAKFLD  
SEG\*

>SPBIB\_v1\_150116|ID:27162628| protein of unknown function [Uncultured spirochete bib]  
MTDMEATLPCAAFLNPVQQYAWGRTEGIAPFIEIPPLNGLPAGEVWVMGSHHRAPSKAIF  
DKGAVPLDELVRAAPEHWLGSKAARHYGDL PFLFKVLAAGAPLSLQLHPDAKAAKQGF  
EAAAGIPLLAPDRSFKDPNHKPELAVALTPFKALAGFRPLEHIAQFLGPELCRALSWSNI  
ARTEDLRLFMRRLEFARGAGFMPLNMLLESRAQTLA ASTASEEREAGLLALDLKARYPGD

PGQFAPFIFNILSLEPGEGLFVPAGVIHAYLTGSILEIMACSDNVIRAGLTIKHIDIELL  
CDILDPDAKPLVVEPYITHAEGVEHAVWNTPADEFRLERLDDLSSANFAYAPEGPEILLC  
TQGKAHIQAGSAFDLKARSSLFVAGSCEQVAVKGPATVWRAIGPAPKAADAAGNSLTIWV  
DGDSLPRDLRPLLVKRVLSPRKYGEVLVNVHFVAARALSGVPAHCMTLVEPGEGAADRCI  
ESLAQPGDIVITRDIPFAERLLAKNIHVINDRGNVFTDRDSIAERRSIRDVMAELRAVGIA  
QSSPKGSQRTSAETKRFADALERTIVKAARLKKAAAR\*

>SPBIB\_v1\_150117|ID:27162629| Glycosyl transferase family 51 (modular protein) [Uncultured spirochete bib]  
MSDRPQGERPHKERARGKNRKPRSLGVRIVRVVVLAVLIAHLAYIGITSALILVYKFANP  
PTTVLMIYRSIISHWKVQKPIPLPLANIPLSVRRMLVSVEDGKFYEHHGIDMEAFKRAKA  
LNEKIGKPMYGGSTITMQVARTLFLVDPKSYVRKYLEVIAALELEFILSKNRILELYLGY  
AEWGKGIFGIERAARVYYGTSVRNISADQAARLIALLSSPIKYTPDTLYRSLILRERYAY  
LVQKYVSPIAETKSEAEAPPPAGIEPSADIEPSADVSAEVESAGPPSETAVPAEPAAPSE  
PAEIVAPEAPAGDTP\*

>SPBIB\_v1\_150118|ID:27162630| putative Major facilitator superfamily MFS\_1 [Uncultured spirochete bib]  
MSDQHQRSAKSGMSVSGKHYSIILLAVITRFLQWGILGILIPVSNLLRMSKGLTLPGLF  
AAAITAGIVVALELPTGVIADRIGRKRITYLASLAFMAASCAALLFASGFAMVSLAFALYG  
VSRALSSGSLEALMIDRYIEANGDSTLHRLMSFVSAADTAGLALGCIAGGYIPGLWTAIA  
LNSNRYQGNLLVMLAFLFLTMLVVFSVAEEKPDPQKQATLRRFMAESLSFIRFSPALLA  
FLGAGAAWGIAFSAIETYWQPQVASIVGSAGSDRLNGFLSAGYFLTALIGSLAATPBLEK  
TKKNPGLLLLILRLLMVALALQTSAGGFAALYLSMFFWNGMASPPEATVLNRLPSDKRA  
SMLSAVSLAVQLGGLVGSVAFGLVVKSSGIRVAWFIAAGVLA VSSFLFPFAASHYGGQTK  
NSSQSTPGV\*

>SPBIB\_v1\_150119|ID:27162631| conserved membrane protein of unknown function [Uncultured spirochete bib]  
MKKFTWLACLGLAIVLVAGIIGFSVQTAGGKVQIRDVRFVGSNGTVMSALLYVPKNATAK  
TPAPGILAVHGYINARETQSGFAIELARRGYVVLALDETGHGYS DSPAFANGFGGPDGLA  
FLRSLDIVDKNNIGMEGHSMGGWTLAAAATMPDAYKSVVLEGSSTGKPYAAEGSTTWPR  
NLAVVFSTMDEFVLMWGVPRGKDAPKSPKLQAVFGTTDPIEPGKIYGSIEDGTARALYQ  
PVTTHPGDHLSNAAIGY AIDWFAKTLSGGNPIPSSNQIWFVKELMTLAGFIGFVLFILGV  
GGLLSVPVFAPVAKVPPAGKPAKGAGLWIGALIAAIPALTFFTFMGWGAKWIKAGSFW  
PQNITSQLAIWALLNGVISIVLFLWHFVLNRKNGAKAEDYGIGL TWSDAWRTLLYGFVAV  
IVCGVFLLGVADYLFKIDFRFVWLALKFPSQIQARIALAYAPVFFLYYLVASLALNSQLK  
LGGKGAARYWFAIGTASAGFLVLLLEYIPLFAGGTLLSAAQPLNTIIAQFLPLMIVT  
SLFSTWFFEKTGRIYAGALINALFISWYIAAGQATHFLVR\*

>SPBIB\_v1\_150120|ID:27162632| protein of unknown function [Uncultured spirochete bib]  
MNTKVPALKGLKIIEFMLTASEPITMSQIAERLGYKVSEVQRTVTYLSAEQYLIRNGAG  
SYMPGPKIYQFADQNRETILINRAEGPMRSFAEKTAASVHLSVLVEEMLHVIFEIESKEI  
VRISIRPGLYKAGSTASGRLLAYAQSPILAATERQKIMELGYAFKDDIDCVQGVYALAVP  
ICTQSGSCIAALASPYVLPARGAKEAFRQELVEPLKRAANDIASLL\*

>SPBIB\_v1\_150121|ID:27162633| Pyruvate/ketoisovalerate oxidoreductase, gamma subunit [Uncultured spirochete bib]  
MTEKTFIAGFGGQGVISLGLWVYSAMKEGLKVTFFPFYGAEKRRGGIARASVIVSNDEIT  
SPLVTSADSVVMNQDSVEIGEKVCKEGGTIFVNSSLVKKDPPARDANIVHVPCNDIALK  
LGDVRIANMVMMGALSKVTGAVKLDNLETVLKSFFPASKHSLIALNIAAVEEGKKAV\*

>SPBIB\_v1\_150122|ID:27162634| 2-oxoglutarate synthase [Uncultured spirochete bib]  
MELAYGHPKSLKPIQTKYCPGCGHGVHRLIAEVVDEMGLQTKAIIITNPVGCISWADLYF  
DFDSVQPAHGRTPAAATGIKRMLPDHLVICYQGDGDLAAIGTAEIIHAANRGEKFTTIFV  
NNAIYGMTGGQMAPTTLVGQHATTAPGRDPGVAGMGYPIRVCELLATLEGTKYLARGSV  
NNMVNIRKTKNYIRKAFEAQMRGEGFTMVEILSQCPNTWQMNPVQSVLEKNMITYYPL  
GEIKNTLNATAGAPATSPAKAN\*

>SPBIB\_v1\_150123|ID:27162635|vorB| Ketoisovalerate oxidoreductase subunit VorB [Uncultured spirochete bib]  
MAEEIRLMKGNAAIGEA AVRAGCRA YFGYPITPQNELTAYMAKHMLAKGRFTIQAEESEVA  
AINMVYGAASTGARAMTSSSSPGVSLKQEGISYLCGADLPAVIVNVARSGPGLGGISPSQ  
GDYFQATRGGGHGDYYTIVLAPKGVQDAADLTYEAFSISEKWRVPVLILADGLIGQMMEG  
VVLPEPIDPATLPRKPWAVGHAVEMGRPNHVTSMNLPDELEAANHARYARYERIKKDI

NRYEEDVEDADVVFVAYGTSARVSHGALQMARAKGMKVGLFRPISLWFPYARLHELAE  
 KGKRFVEMSMGQMIEDVRLAVNGKAPVYFYGRCGGNIPSQEEVFAEVARLMGK\*  
 >SPBIB\_v1\_150124|ID:27162636| conserved protein of unknown function [Uncultured spirochete bib]  
 MAIKGSVEIDRERCKGCQLCIRACPTKVLGVDTEPNSWGYFPAKVIADKCIACGNCFAV  
 CPDVAITVYKL\*  
 >SPBIB\_v1\_150125|ID:27162637|ptb| Phosphate butyryltransferase [Uncultured spirochete bib]  
 MKHISEIIEKAKTFGRKLAVASAQESSVLEAVVDAYNEGIAEPILVGDPAAIRAAAKEA  
 NGGKGVDISRFELIEEANLSAAAARAVALVRSGEAAFLMKGIIDTSLLLRAALNKESGIN  
 AGRASHVAVMEVQTYHKLLVLTDAALNIAPDLPAFVDIINSVAVVANALEVKTPKVALL  
 AAVEKVNPKMPCTVTASILTQMNRRGQIKNCIIDGPLALDNAISAESARIKKIQSDVAG  
 DADILVAPNIEAGNILYKCLLDLAGAKGAAIVMGAAPVIVLTSRADTAETKLASIALASL  
 LGSTSLRA\*  
 >SPBIB\_v1\_150126|ID:27162638|buk| Butyrate kinase 2 [Uncultured spirochete bib]  
 MSLAILVINPGSTSTKFAVFEGGTRILDQSISHSAEEIARFPSIAAQYEFREKAIQDVLL  
 QKNFDACKLGAUVVGRGGLLHPIPGGVYRINEGMKADLLAAKYGEHASNLGALIADAFARP  
 LGIPAFIADPVVDELDDVARVSGNKLFRNSIFHALNQA VARRFAKERGRSYEELNLI  
 VAHMGGSVSIGLHRQGRVVDVNQALNGEGPFSPERSGTL PAGDLAKLCFSGRYTQQEVLK  
 MITGKGGMVSFLGTNDMREVERMREEGNKEADLYYRAFVYQVGKYIGSLAAAACGKVDGI  
 ILTGGAIFWKELTDRITEMVSFIAPVVVYPGEGELEALALAGQMALSGEIEIKEYVP\*  
 >SPBIB\_v1\_150127|ID:27162639| protein of unknown function [Uncultured spirochete bib]  
 MREPGVFCDALRTLAKVSIEMAFQNLQISLAFHLHISGILHILLYISGVAACHWLSSS\*  
 >SPBIB\_v1\_150128|ID:27162640| conserved protein of unknown function [Uncultured spirochete bib]  
 MIGFFEHLFLIRGVKTYALVGSSGTGKSFRACLVAQKYGIDLIIDDGLLIRGDQIIAGR  
 SAKKDPYLGAVKTALFDEREHREQVSRALQHERFRKVL VIGTSERMVQKICERLQLPHP  
 VKVIKIEEATKAEIEKAVQSRKVEGKHVIPVPALEIKRNYPSIFYDSVRVFLKRSFGVG  
 ATLPKLYEKS VVRPEYAKRGRVAISEAALSQMVVHCVNEFDPNVRIMRLAIRNDTQGYRI  
 TVVLEVPFGTRLASKIYSLQEYIVDSIEKFTGILVAEVNIVIDRLAVRPQKEQKWGRAID  
 ARRQSV\*  
 >SPBIB\_v1\_150129|ID:27162641| Phosphoglucomutase/phosphomannomutase alpha/beta/alpha domain I [Uncultured  
 spirochete bib]  
 MSRIHPILGLPIADPNKIPLSRENLPSEDIQNAARSLILSASGWRKVFADPSTEDTYA  
 QWAYDRSAENSLSRTISSADAVIVAGMALVFASFIKEQCKGRAPIVLLGIDTRPTGPAIA  
 DVFARVLIGEGCSVRYLFI VPAPEIMAFAAQTTSPLDNEAHADAFAYISASHNPPGHNG  
 LKFGIGGGVLTGNQIAPMIAALKSFIADPDSRSLAAISKADPRALAQCYESVAHWKRF  
 SQSAYMLFAHRVFTDEDSL ERQEEVLSAIA TACEKRPLGVVAELNGSARTQSIDQDWLSA  
 LSLQTKMLNVEPGIFAHRI VPENDSLED CRAALAEAHQENPAFMLGYVPDCDGRGNLVY  
 HSRMLQSAVPLEAQQVFALACLSELA YLKWKGETRPVAVVVNDATSMRIE AIAALFGA QV  
 FRAETGEANV VACA EKL RSEG WVV RILGEGSNGGNITHPSKVRDPLSTLGSIVRLRLRGD  
 ANSGKTCFNLWLDAIGASDRYRPDYLEDIIDS LPQWATTS AFEPYAALKIASNDKVALK  
 NAYQRLFLEEWPRMQPQLAARFGIAAWKALATIGANEQEIGSDFGASGNGGLRIVLFSHA  
 GEARAFLWMRGSGTEPVFRIA VDIKNGSSEDEAWLRSWHTRL VMQADLLVSKAQDIVG\*  
 >SPBIB\_v1\_150130|ID:27162642|rnhB| Ribonuclease HII [Uncultured spirochete bib]  
 MKKSTNYCTFETVLKIPVHL VCGIDEAGRGLAGPVAAAAAILSPDFPMEILNDSKRMSK  
 ARRENAFQVITEKALDWSVGWATVEEIEQRN ILGATLLAMERAFQGLRKMPALVVVDGIF  
 TPTLMADGAAVEAATMPKADGVVPAVMAASILAKVARDH CMDCLDQTMPGYGFRVHKGYP  
 TRLHREAIAALGPSRYHRLSFQLLAQESPLLFDPSGE\*  
 >SPBIB\_v1\_150131|ID:27162643| protein of unknown function [Uncultured spirochete bib]  
 MWTSARALLMEESILSFLRTREYECVQAGEAVQSARSVPAGPPLFQIYVHRHSRTAAFEA  
 IDGIAVQWLDGAVHLILPPSPHDDAGL VALLKDTSNIRRIAGTKHAVMRITGKMPSMNWN  
 HALFLLMQLPHAQSSHSQQPHSLLRQKHVSDTPRV DGEVRCVDASFEDLNALVSLHLE  
 YEREELALYSADASETEMRMRSLLANQIVCMAWAGNEAIGKVNTNARGIYCDQIGGFYVK  
 KEWRSMGIGTNLLLYLLKKIEA EGRH AVLFVRHDNLAALRVYQHLGFLAVGEY AISVARQ  
 HI\*  
 >SPBIB\_v1\_150132|ID:27162644|trxB| Thioredoxin reductase [Uncultured spirochete bib]



MSQPYDFAIIGAGAAGLAAAQYGARANLKTUVIEEMAPGGQALLIDALENYPGIEEPISG  
YDLAERMRVQAERFGASFIDASVSNVRKENGFRVETSNGPVESLTVLVATGAKHRQLEI  
PGEQEFMGKGISYCATCDGPFKFKRMLVVGDDAACDEATYLSKLSAQIVMIHRRDRFR  
AQKALAQRVLSNPSIQVRFNTVAKEIRGDTKIRSVLLENVLTHEITEEPFEAVFIFIGSI  
PQTEFLKDTGVALDETGYIITDCTMQSSIPGLFAAGDVRATPFRQVITAAADGAIAAHAA  
ANYIDEQRGQAYR\*

>SPBIB\_v1\_150133|ID:27162645| protein of unknown function [Uncultured spirochete bib]  
MNDPDSRSLLEMARGQVRHLLSSLPDIVYILDEQGHFVFLNEAAALLGYEPSALIGKHFS  
VIIHPEDRPNISRDIVVEKIRQANKFPEIAPKLFDERRSGERMTRELEVRLVHRDGHIIY  
GLVNAYGERDIDVPLLADLVGNAHTIGVIHDISAMHLYQQSLEESLAAKEQLLREIHRV  
KTNLQLVASLAHLKQLDSARRDTSEVLRELEAQVKSIALVHEALYNSEQIDRISAGKFFA  
QFCHAAEEALESVGVSTVHLRFSSTDCSLDPDRLVPLALATLEILGGAYRFAFEKRAETEI  
RLDYRCLENGEQVLELEGEGLMSAADSMVLHALLRQANARLETEVKEGARQRCRMVLLNH  
SEKDAENREQGRAE\*

>SPBIB\_v1\_150134|ID:27162646| Histidinol phosphate phosphatase, HisJ [Uncultured spirochete bib]  
MAFSFHSTHSTFCDGKADARTMAEAAFAHHYTHLGFSAHAPVPFKTRWNLPWERAQSYVET  
VRALAQEFEPKGMKIFLGLLETDYAPGITMPDNPAVDVFLDYRIGSVHYITAPGEEPFTV  
DEPQEEFARNVLRWEPDGDYRRIWKRYWQYMSEMIARGGFDIIGHFDLVKKNPDGRWFD  
EQDPAYLDAAFQAVELAAEKQLVAEINTGGIARGKHHEAYPSVRILKRMHERGLRLTLGD  
DAHAPSHIGTYQHAAIDAARRAGYQSLWYLDAPGVWKEISIDEAARSR\*

>SPBIB\_v1\_150135|ID:27162647| Transcriptional regulator, TraR/DksA family [Uncultured spirochete bib]  
MDNAFIERMKNLLLTQRQEILDITIAESNEQLRTVLSETDPKDSADIASDDIDRIMIEALI  
SQDLKRYRAIEAALLRISQGRYGLCAKCGKKIPQERLEAIPYAVLCVECQKSDERRNR\*

>SPBIB\_v1\_150136|ID:27162648|infA| translation initiation factor IF-1 [Uncultured spirochete bib]  
VAKEEAIEVEGIVKEALPNTMFRVELANGHIILAHLSGKMRKHRYIRIVPGDKVKVGLSPY  
DLNRGRIIYREK\*

>SPBIB\_v1\_150137|ID:27162649| putative 1-acyl-sn-glycerol-3-phosphate acyltransferase [Uncultured spirochete bib]  
MIHARRYHPTNFKFFTWLMRYTYGLWLRRA YRIVAINAELFKELKPPFILVGNHTLLDP  
FIANAFVFPPIHWVASDGNMRSPIMRFLIKLVGSIPKSKAIPDIETVNWIVDIIRKKG  
VVGMYPEGQSTWTGTTPFAFYSSAKLLRLLRVPVVLAKTQGGYLTKPRWSHVRRPSKVEI  
AFSVLFTPEQLRTTPIADIDAALNNALAYDDTEWCKREAIRFESARGAESLELALYICPK  
CGAKASLHNGNRFACDRCDFSVEYGADGSFALPPGSADPVFLPPFSSEPFLESIAHWK  
LQSAFMQAELAEWLRAARWDPIFSDENIQLKKGKRIDSMTMLRGRIDL FIDRLEFRDAH  
KPGGATGPLIFPLDTVEAEGVLKWNFFEFYQGMNVYRVVFGDPKASGRKYADAIGLLHEL  
SHSHLPGR\*

>SPBIB\_v1\_150138|ID:27162650| Na<sup>+</sup>/glutamate symporter-like protein [Uncultured spirochete bib]  
MDFSWKFVIDAGLISIALVFATFLRSKITFLQKYLVPNALTAGFLLPIYNYLLPSIGYA  
TNRLGDLVYHLLNISFISMSLRSSPPKIKGSRNNGVVLGMSAVILFGYASQAILGLLLTL  
FFLPKIHAFGLHLPLGFALGPGQAY AIGKGWESMGFEGGASVGLTFAAIGYLWACFGGM  
LLIHKGIRKGMKSDQLTAMSDKAMLTGIIPREAEKPIGAQLTTDSEIDSFSYHAALVV  
FVYFLSFLFLKGLTLVLGFAGKAGMELATNLWGINFISAIHAIIVRKIIDALKLGYVLD  
DNSLTRISGMAVDYMVAGALAAISLVFVGKYWFPIVLMSTLCGFMVYYTLPWVCSRIFRD  
FRFERMLMLYGVSTGTLSTGLALLRVM DPEFKTKVSSDYMLSAGLTFVLALPFILAINLP  
AKAYTSGSMTPFWIFIAIAAAYLVFVAVVYWILARKRRFAMPSPDNFYRPGK\*

>SPBIB\_v1\_150139|ID:27162651| putative Transcriptional regulator, Crp/Fnr family [Uncultured spirochete bib]  
MNDREIAKLATCNLFRNVSIERFADFMKAARYREHEFRKGE LILLQGCMYASLYILLDGS  
AYAEMTDDEGRMRVETFAPVEALASAVLFSKPVLPVTVGAQSDCRIISFPKEEIKMC  
MSEKAILEGFLADSGARVQFLSERLRLTRFATLRQRIADWLVRKAQAQHTMLRDSSETAQ  
SPSPAQQNPVSIRVEPSFEKMADLMGVARPSLSREL SHMRS DGLIDMEGRTILEDIEAL  
KNIRNSKSRQP\*

>SPBIB\_v1\_150140|ID:27162652| putative NAD(+) diphosphatase [Uncultured spirochete bib]  
MKKDPQRFMLFRGQDCLVPAQAAGQLQ SMAELADSTAASGAHFPNFPEISPGSVSWPAGA  
IPLSLFSAKPDGYSYSVVFVQGVVYGAVLLKDDDEPFAEVASLGAFVPPFSRQLALSFS  
HLGRFVLLARAHAQWAAVSRFCGACGAPLVDANGNEDVREPLDDHAYGTRFCPRCKRLFF

PRMSPVVIVLVRGKEILLEHNVRFPGNRHSLVAGFVEIGETLEEAAREIREEAGIEVK  
NLKYVRSQPWPFPSLMLGFVADWAGGEARPDGKEIDHLDWYTADNLPELPMKGSARWI  
IDTFMAGGFSNF\*

>SPBIB\_v1\_150141|ID:27162653|upp| putative uracil phosphoribosyltransferase [Uncultured spirochete bib]  
MEQRVSKILKAEDLDGYLSAKDLDYLSQMDSLYRHAMVSFNILATSTSESQKHREEQTL  
IDLYNRMGSLMQEICAAEPRIQVYSFVSPQETHGEVSRLIAKLRDVTSTGRQEFVYYIQRA  
FELLFTLAFGGSGRTNKNYLIVRTPVTIPVQNFAVHKIPNVDDAVHDTVMCMVLRGALLP  
SMILSKEIQEYSSTGYITPFALFKIKRDDTKSETTMEYVLDLDHSYFDLAQLDGKHLFFA  
DPMNATGGSLVTVVKYLLEQGVKSPASVKFFNVISALKGSLRVVRAIDNITYTLWMDPSL  
NERAYIMPGLGDAGRINGSDEEGHPRDMLRLVADYGTNITGLYRSQRLRIIEETVLRHRS  
\*

>SPBIB\_v1\_150142|ID:27162654|pduL| Phosphate propanoyltransferase [Uncultured spirochete bib]  
MLETKMIVNLSNRHIHLSHEDVEALFGKGYQLTKTKDLMQPGQFACAETVTIKGPKGQFE  
GVRILGPERKETQCEILASDVFKLGVPVGPVRESGQLEGSFPFEIIGPKGSVKKEKGLII  
AKRHIHFDPESAKRFGVVDKQLVALKVGEERGAILLNVCVHPTYAALCHLDFDEGNAL  
GIGSGVTGEIVQV\*

>SPBIB\_v1\_150143|ID:27162655| DhnA-type fructose-1,6-bisphosphate aldolase-like enzyme [Uncultured spirochete  
bib]  
MNEGAILRMQHIFREDGRTVIVAADHGAIAGPLKGIESPRLARLCAEGGADAILAHRGF  
VRAGLEAWKRQLGLVLRASGGFTTLGGRFEEELIAGAEDAVRWAADAVAITVKFGHAREG  
EFIKNAAGLISACEPCSLPVMIEAMAFEKGEFSTRADALAIAVRAAEEIGAAFIKAAMPQ  
SIDDFVQIARGTHVPIVLLGGERTDSLPALESIARAMDLGASGVAMGRNIWGQDRPREI  
LEAVVGLVHGGWDIQKVIHCEHHT\*

>SPBIB\_v1\_150144|ID:27162656| putative Pentulose/hexulose kinase [Uncultured spirochete bib]  
VIFAIIDFGTSRAKGAIFDALGACLGMAEVELTEDSRSSGLIHEIDARGWLTAMAEIAGRL  
LDPLDQTARATLKALVICGNGPTILPIDEHGEPLANAITWLDRAFFESEESAALGYSL  
DAAFNLPKILWIRRHMLRLYEASRYFVSCPEFVAGRLTGEWTTCLPNRGYTKIHWDEAAL  
RALALDERKFPPSIGIGGIVGHVQAQAAEAYGVAPGLPVVMGGPDFIASLLGTATVAPGR  
TCDKGGTSEGINLCAATDLANAAPSASRAASSGLLVMPHIIPEYYNISGVISTSGKALAW  
FKDRFLPEESFGAIYSRAERAKPGASGLVFLPYLAGERSPHWDPDASGVFLGLRLEHDL  
AMVRAVMESTAFAMRDVISVMEAGAHVEDLRSTGMPAQSAIWNQIKADITGKPVKVPAP  
SEPELAGCLAIGRFALGEEKSLAQAAEHVFAPRAIFEPREYAALYDELFSVYRETYRRL  
ADLFPLLRRAGHTAGSAQEEKP\*

>SPBIB\_v1\_150145|ID:27162657| Theronine dehydrogenase-like Zn-dependent dehydrogenase [Uncultured spirochete  
bib]  
MKA AVL VAPGRFEIEERPRPEPKENEVLVKLEACGICTLEQRLFTGAMRLPLPLVPGHEA  
AGLIAAMGSKVIEELSPGQKVALDLVERCGECYYCRIGKSNLCLNRYKNPARMLGGFSEY  
IVVRPNQIFVPDSVSYEEASFAEPLACCIHSLKRLKVAMTEDLLIIGAGTMGLLHVLA  
RSMGLRITVSEPDAVRRDTAKALGADFVIDPAKTDIVEFGREITDGIGFSSCVITSPSPA  
ALEPAIRAMAKAARINIYAYEDVMQIPLDLNTIHRNELLITGTEGRVQEDFFQAVRLLS  
FGKIDVKPLISARTSFSTIEEGFRTALSGKAYRVVLMHSLP\*

>SPBIB\_v1\_150146|ID:27162658| putative Mercuric resistance operon regulatory protein [Uncultured spirochete bib]  
LTERLLKIGELASLFGVTSRTIRYYEELGLIEASNRTEGLHRRYPADVIRLKRIEELKR  
LGLTLGQIREFFMLY AEDPSGEKCRLLMLQIYEDQKKEEEAKILEARRHIAQIEENITAI  
KEKKSFFSFCPGDECKDCSFDGFCDES VYNQLKE\*

>SPBIB\_v1\_150147|ID:27162659|tpn| Membrane lipoprotein Tpn38(b) [Uncultured spirochete bib]  
MRRFLVAFVLAIVAGTALWAQAPRIGVFIPGVREGSPIYDTMAKGAERLAAEISGASIKI  
FEAGFNQAEWEEKLTSFVASGKFDIVITSNPSMPELVNNVSKSFPKQKFCICLDGYLPGNP  
NVYSALYNQLEQGYVTGYLAGLVVISGMKGTNPDKKIGMIIGQNYPVMDKMIIPGMQGL  
KAADPAFQLDIRVLGNWYDAKAADLSRSLYAAGADIILPICGSASQGA VKVAQETGKYL  
VFFDDNEFARAPDNILGCAVLHQEDLAYRSLKAAIEGKLPFGKADVVMGMEGYIEFLNTN  
PAYIKNVPEPIRKKVDAAIQSIKSGQLTFQVPSL\*

>SPBIB\_v1\_150148|ID:27162660| putative Uncharacterized ABC transporter ATP-binding protein YufO [Uncultured  
spirochete bib]

MQPMIAVRMRGISKRYFSPGIRANDEATLEVERGSIHAIVGENGAGKTTLMKILAGLELP  
DAGTIEIEGKPVHIQSPAARELGIGMVHQHFLMFDDLTTAENIFFGLEPLRVSKIPGVL  
GILDRQSLVEQTRRIAADYGFVLDPMAQAGDLSISARQQVEILRQLARNLHILILDEPTS  
VLTEQETTALFEKLAEIRRMGHTIIIIVTHKIDEVMRIADRVTVMRQGKTVGTYDIAATTA  
NELACLIMGTNVCEEISPRTEPAAQGPVVFQIEGLSARGHHHGETGVTDLHFAVHAGEVL  
GVCALSGNGLAELEDALGGFLVPSKGFICFDGSRDLDIRRIHEYRQLLKKGAIGYLPSTRM  
RRSMALSLTVRDNFMAVSRTRYFQRGWLESTLATRQTQDALHSFDISAQPEQKTVELSGG  
NIQKLAIARLFSIQLPKLLILCEPTWGLDIKSTENVHRRILDAKAAGSAILLSSDVDEI  
LALADSIMVLYRGRAVLLASNSGELNRERIGEYLLGARSE\*

>SPBIB\_v1\_150149|ID:27162661| putative ABC-type transporter, integral membrane subunit [Uncultured spirochete bib]

MHSERELPAGARIALAVALSITLAAAVLALFTKDFSPALGQFFFEPPFANRYFFGNYSIADS  
VPLMIAGLGVLIAFRSRNFNLGGEGQIYAGAIAAGMLALSPPERIPPAQAWLFAALAGMV  
AGGLIGALSILKALWHVSEMISSFLISAIVLNVGDYLLITGPFQDPASNFQTTTRQISSQL  
LLPRILAPSKLDISVFIGLALIAVLAIMSKHTRPGFELRVCGENEEFARYCGIPVALYQS  
AAMAISGALYGLAGALIVMGPQARVMRGFSSGLGWSAISVALLAQSSEAGILPSALFIAY  
LKAGSDHVMIGSGVPSEIISILQAAAMFFITARHFPVRKRRRP\*

>SPBIB\_v1\_150150|ID:27162662| putative ABC-type transport system, permease component [Uncultured spirochete bib]

MSTPITILADILKYTIAAATPLLFA SIGGLFSQLAGMLNIALEGLMGLGAFFGMAAAGAS  
GSLVVGAMAGVAAA VVGSWLMGIITIKFKANL FITGLAVNLLAVGITAVLSQSWFHTKAV  
VAFDIPRVMLAFPAFLGRIPFIGPVLFSQNILSASAWLWVIAAAFIIRNTRHGVRIRATG  
MNEEAVNALGYRDPDRYHMAALIWSGVGSGLGGFALGVSISAFVFNITAGRGWIALVAMYL  
GRGKPLWIAASCLLFALAESLSNYVQGFS AIPPLLVLALPYAVTLVSLVAAAAGKKD\*

>SPBIB\_v1\_150151|ID:27162663| Pyrimidine 5'-nucleotidase [Uncultured spirochete bib]

MIRALLFDLNTLYSEATGLETGVLQRMNQFVADIFNLPFSEAGKFRREHAKPYGTTLEW  
LMREKGFAPER YFSYIHPEGEEDCLEPDHVLRLMLNSIPLPKAVLTNAPREHAERILAK  
LGAIECFIGVYDIWFNELLGKPNPKAYLRALDASGFALQETL FVDDL PKYVKGYADLGGP  
AVLKDEMNRFPDLPCRRIQTIELPEVLDEIGMKAS\*

>SPBIB\_v1\_150152|ID:27162664| Peptidase S54, rhomboid domain protein [Uncultured spirochete bib]

MIPIGDDNSGRRGKAVVNWILIGLNVFVFIQKFALDDYATLALAAIPEEILSGHRLFT  
LITSQFTHAGFAHILGNMIFLAVFGDNVECRIGKLR YILLYLLSGTFGMILLQILLALMAG  
GAALQMPLVGASAAISGVLASYLVLPGNKVVVLLFYFIPTALSAWVVIGFWFVLQVLGG  
LSGLASIQSGGTAYFAHIGGFVSAYLWSRGYKKKELERILAWRKRLAGDSDGFHWWIVD  
D\*

>SPBIB\_v1\_150153|ID:27162665| protein of unknown function [Uncultured spirochete bib]

MAERNERYRGLFLHAKDTARGDRIVTFLCKEGLSLFLFGGPKSSLRSVATPYILADIEV  
YHRRNDFSKLTGATILETFDSLHTSFSHMQAAAAAAEFVIRTSAFGGEYGLALQMITTL  
LRELPSIEEDSAPYAMYAFLWNALAPQGLAPDISACEHCGKRFTEEGALPGRLLAGERSF  
LCARCAEERRREGFPASAMILIDAMVLQCLREILDVSYQAARCMSVNPSSLHIEAIIES  
LAESAAEGPLQSLRLFH\*

>SPBIB\_v1\_150154|ID:27162666|pdp| Pyrimidine-nucleoside phosphorylase [Uncultured spirochete bib]

MRAVDILMKKRAGETL TEAEIRFIIDGYVKGEIPDYQISALLMAIFFRGMTAKETA ILTE  
TMLDSGDRMDLSGIPGPFVDKHSTGGVGDKISLPLAPMVAACGVKVPMMSGRALGHTGGT  
LDKLESIPGYRTGLELSEFRKGLIEDGFAMTGQTARVVPADKKLYALRDVTATVESIPLI  
TASILSKKVAEGADGIVFDVKCGSGAFMKTYNDAKALASSLVATGTAMGKR VVA VLTDMS  
QPLGYKVGNFLEIEETLDCLEGKGPQDVMELTFRLGAWMLVLGGAAETIEEGRARCEEAI  
SSGAALERFYRN VVRQGGNVGQMLKRRGSWRSDFARELKAENDGYIESIDALDIGLAGVY  
LGVGRNRTE DNVSPTAGFIFEKKRGDLIKKGDRIAIAYGKDEASLDPAMALARKAVSISK  
EAPQPLSLVIEITAP\*

>SPBIB\_v1\_150155|ID:27162667| Single-stranded-DNA-specific exonuclease RecJ [Uncultured spirochete bib]

MKWTKKEIDPTLVREIARRYQIDTLTASILVRRNITEPEQLRFYLEDLQLLHNPFLFAS  
MEDAIDRLLMAHDEDEKVLVFGSDTDGITSTALMTELLRDFGLEVFHKVPEGEEPYGLS  
VSAIDFAAENNISLIVTVDCGISNHDEVAYAQRKGIDVIIADHHHLQAPAPPEAIAVLDP

KLPDCGYPPFRDLGCGVALKLAHALAIARLGMYPKPFALLYAGSALSLEAAGLADDAGG  
ADSAMVADSVSALTIEAVRLDNLIETSRLKIRSGSDGVFSPDTLEKLEKFLRGRVIAWN  
KKEIHSFFREHFGNAEALDVMDLGQLSAGFWPAMARSPFASLVRASRLKKYAGSAHSAID  
TLKGIFSA YVLQTLQSQNLLTERMFQLAALGTIADLMPLKDENRIIVRKGVESINASPSN  
GIRELKSGLGLAKPLGAIEIAWQITPTINAAGRLGTPKLALDLLQAKTVESAITAASALI  
QANSERRRLGTEAWENIREALNQSLEKSGGKYAVVGSSEIKPGITGLLASKAANIMKVPV  
IVAVFKADGTCTGSIRGGANFPLTRLLAHCADLFLDYGGHDSAAGFTLKTERWQSFLERL  
SEFMAQTEYNAEPELSIDAELPHAYVTPELVNLCLRFEPFGEENDPLVFCSRQVSMIDA  
QVVGKNGKNHLKLTDFGTYKWPAMLWDGAERLERDFSFRKGDRAVDILYKVTMNYWNGEE  
RPQLELYDIRRAEG\*

>SPBIB\_v1\_150156|ID:27162668| exported protein of unknown function [Uncultured spirochete bib]  
MRSTCPVKFLLLGLLLGSASVPRAFSQTVELPAVHIEETLPFDLLAPSAGTTIIEEHAIQ  
TSAAPDPLSLLSSVPGVILSPTGSEGAQASVSLRGSTSNQVLLVLDGVRVTDPATGLTDF  
SRLGIPLDQIVQIEVQRGGLSAQYGADAVGGVIHHTRRGSKNLSARISLENTSFLPSSI  
TIGNGLSAITVPFVGSALIDGQSLSLAENQWLSAWAKISRAANGYPYDNTNGERRRREN  
AGLLAASGGLQTRFPLSAGEISSAKVSYRSVGGIPGSLDIPTPEAHQEDWNANLTMQFRT  
DALLAGALALELSPYAQAGGIRYQSSQTSAVDSHISYRAGLDSSLSWLPWNNGEVKAGAS  
FRYDRLESSVVKGAGGSAPERFSGGIFAEPSFGFGTWTAVPALRFDMTNDFPSGVSASF  
LIHDFSKQTAIRATISSAYRAPSFDDLYWPASGGAEGNPSLKPESASISGDISLTHKEDAC  
TWSVGTAFARYARDVILWQPDDAGIWKPSNFGNALYPGIEAESSWKAGSWNLGANYTFLYS  
YVLSGNLSLSDRRVPYVPVHAASLSASRRTTKAFKSAFLFTYQSLRFTTTGNRAFLPATL  
IANAKLTWELGPRSDFELSFQNLFDERYEA VKGYPM PGFSLSATVTLRFEGARPGQN\*

>SPBIB\_v1\_150157|ID:27162669| exported protein of unknown function [Uncultured spirochete bib]  
MNKLWQRIGRPVLFAGMIAVLLAGLAGCDLFLSPQGSSAVVFAVDSKNGNVYEIDADKAE  
SAAVPLVSTQQNATGKMIISGTFKAFKAVASWQNTSPGLYWFDLSSKTPAVAQIGPKISAQ  
YICIASSTKGYVSSADWAGTYANAVYFPNPPSSPSAGFGTAISGFDAGFYQDVAYVDDGN  
GTGRV FVADNGNGKVYRLNAEGTLVEKSFAASAGGTTGLLAGEFDSNGDGVAEAGV FVAN  
SGGYDANWNPLPGSIDFIPLGASSDADV VVVQSDLSATALAFLDATHLAATSYGHTWLID  
LSKLASDASRLTEIKTSSGASFGSMDIAVREGYAYVPDGAQT VYRFGLNSPTTAIPTGKS  
GEMITNIAVRQ\*

>SPBIB\_v1\_150158|ID:27162670| protein of unknown function [Uncultured spirochete bib]  
MRQRRNQLFVYRAAGLALSLAIHALIIFAPIGMRAVRQPFFVSLNIDELREADVLSREAP  
KVIQDPGQIKQIKQELALKQTEAPETTQPFEKEAVLPQAEAPETTQETFGKKAAPPQT  
ETPKIQVPDKSAVSETIAAKEPQERLSAQAEIAREIPEPSALEEAPAPARAMSEMPIEA  
SATLPAAPAVPIAESEVQFAPAEPKAPQAAQAFQAAPQAARSTEPTLSDVPADAL  
QPTPSQALSVPQAEKPLPAKPKPILSREGLASSLIALLQSISGDVPAGQKQAKGAISRSS  
VSTAQSSAAIAPQEGVFHDDAEIIRAEHVNDFLAKRKSGLAAFQGEQKPESALVPASLH  
ESQLQPIAQGSAAESSAGSLEARAEGSASLTNQHAIQNDSGSANAVVEVREQSRADGALA  
RSDASEPSGIDAPESPKSAVSASDLDTESPLILEKPLERDPLEPARAEPVQAEPARSKSA  
SMESAPASYDTVESLAAAIAAGKLAAQKQYPAAALKRKSSEGTVRIALQVAPDGTLASLAIQ  
SRSGSAILDEAALQLVRSIFPLHIRLETA VSLIPVEYRIPR\*

>SPBIB\_v1\_150159|ID:27162671| conserved membrane protein of unknown function [Uncultured spirochete bib]  
MSNKKEQKKQASLQSGALQPHVSQPEAQKKQPEPQKQAPGLSSFAFPILLVLFV VAGFL  
LRGALAPLLSKKEALREWVLAFGAFGWLVFISLQILQVVIFIPGEVMQISGGFIFGFWG  
GLALTIAGIGIGSAINFLGKALGPQFLMAILSREQYEKLQRYAKDARTFAGLILLFLIP  
GIPKDVLCYFAGAGEREFLYFIVASMLARMPGIIGTTLAGSAVYKDKLGLVVVLA VVTAI  
AMILGIFFRNKIEAAIKKLLHRKKA\*

>SPBIB\_v1\_150160|ID:27162672| Transcription factor [Uncultured spirochete bib]  
MPNDQTTDFQIDQRVVYPSQGVGRIMEIREKAFNGQKTLYYIIYLEFSDMTVMVPVDKVE  
ALGIRPLVSREEAETALEYISQAASTIPSDWKLRYQMNDLLKKSIMDIAAVVRSLYQR  
SKIKELPILERKLYESALNLLQDEIAFALDRPKEEIVKIIRANLDK\*

>SPBIB\_v1\_150161|ID:27162673|ispDF| Bifunctional enzyme IspD/IspF [Includes: 2-C-methyl-D-erythritol 4-phosphate cytidyltransferase ; 2-C-methyl-D-erythritol 2,4-cyclodiphosphate synthase] [Uncultured spirochete bib]  
MSTSLSKPIAPSLPLDGRVFALITAAGSSTRFGGQKKELEQFEGCTVLERAIEPFIETC

SGIVVTCPPGARAEFEAFFAQSALSPVIARLERGFAIVEGGSTRQDSVLFGLGALKELGC  
DRDIVLIHDGARPWISADLVRTTIEQTRMHGACLPLAPLVETPKIVKGQVVHTHPSRAHV  
MTAQTPQAFSFEILAAHELAAREGYVATDDAMIWDHYVGPVFWIEGERQNRKITYREDL  
FGSPAMPEAKPAAAPTTRTGIGYDIHPLIADRPLLAGVQIESDRGEAGYSDGDVWLWAL  
IDALLGAAALGDIGTHFPPGKPEWKNADSTALARKVAAMLHRQDWHIVNIDCTVILEKPR  
LGPYREQICSAIARALNIPQGSVSFKAKTKEGFDAVGRGEAIEAHAIVLIAR\*

>SPBIB\_v1\_150162|ID:27162674| membrane protein of unknown function [Uncultured spirochete bib]  
MTSLAAYFLALFGNLLSLGFSLQKKYVSWLSAKRRGVRIKRGEIIGWLSGFTLMNLQPI  
FNYLALGKLAPNIVAAIGGSNIVFTIILSYFLLGERIPAGKIPWIALMAGSLALAGFVGQ  
ESSKQFQVEAFWTAFFIPTGFAMLVLLANRKMTPAQVGIFLGSAAAGALGGFMVLALALR  
MTRGSDFMWIFSPYL VYIFCGISSFSIKQVAFERGRMAAVAPSFYGLLVLYPSIATYF  
VSSVPLHPQQILAFGLISVSIILISL\*

>SPBIB\_v1\_150163|ID:27162675| protein of unknown function [Uncultured spirochete bib]  
LISFENWKEGFLVTVAGQRLWHS AKRPAV FVHRAGEMRSAWRSAGTCLPTMASGRSALF  
RFSGGLVMREELRDARSVA AFADYSSAYSTAFSLYFSCLDKEIDSVRLRFHDMPKAHWN  
GLGPREQHLARGTIALPLGARSAAFAMDGRFILCSSS GERKLR FSEAEMLFDLDLPAEVH  
FGYARTPAEACRLWRY SFGSLDSFFENPDES YRG AHSGKSQTLIAAEARAH SVVIPQEA  
GLLGSLSFSGAGPEDYQQLNMAVAQAVREGSIWKYANLMLCQPDIALPAQFRREIGNAFI  
SLGDILPARLKNRYAKIRAGLEKYWEFCRMRWTE DGIPALLHPSLLYPQDVALESRDDLL  
MAGADMV FAPNLKEK GELASL VLPEGEV VHF WTSRIYPSGRVT VHAPAGAPALFYRAESE  
YSWLFDSVRQVASRL\*

>SPBIB\_v1\_150164|ID:27162676| L-fucose isomerase [Uncultured spirochete bib]  
MKETITLGVVCLARTTFDYAAAKELWDGIRSNLEAIENVRIVAPHALVFEVDEAKAAASQ  
LARAQVDGLVIISGTFHLGHLALEL VKT VHAPVLLWGLPELPYNGGKIRLNSVCGVNLNA  
SNLYKSGVQNYHV TIGEHIDMNWVDAIRVLKVL SRSHIGILGYRAHGFFNLSVADLALYR  
QTGILIDHYELSEVWNFPASDEAVQARATQLRGIFDVSGITAEQLHKVAMLA VKLQGF  
KYALDALAIRCWPEFAAEYGISPCAAMSL LQSEHRILACEGDVEGGLSMLMHRVGAETP  
FLDFESQVDFEKDFALFWHCGVAPCNLWDGRCVRS LD TYFAGGKGV TAD FVLKEGELS  
VLRLDSSEGKYRVFLQRARAIPMEKELKGTYLKAKFDVPVKQVLDK VIGKGV AH HASV  
VYGN YIEPFRIA AKIAGWEVIE\*

>SPBIB\_v1\_150165|ID:27162677| bcsP| 31 kDa immunogenic protein [Uncultured spirochete bib]  
MKKIFAIALCLVLATSVFAQQRFLTIATGGTAGTYFPLGGALADIWNKNIPKMNATAQST  
GASIANINLLKGGNVDVIFTQNDVANYSYNGTELLKDQAYKDLRGMVCLYNETIQLVALE  
SSGIKTLADLKGRVSVGAAGSGTEANARQILEAAGLTYNDIKVQYLSFGESANNMKDG  
NIDAAFNTAGIPTAAIQDLSVSKKMVLVPVDKEAASKLMAKYPFYAVQVIPAGTYQGQTQN  
VTTVA VKSMLAVSSKMPADLVYELLKTMFDHTDRLIAAHAQGKNVKLETALEGMSIPLHP  
GAEK FYKEKGILK\*

>SPBIB\_v1\_150166|ID:27162678| protein of unknown function [Uncultured spirochete bib]  
MNDGAGQSVPRRLDKAGMERTKR SRWFILAAVILGTAIAGAALLAFLFNVLVSALII  
KDSTGAIIVRLPLQDQGQFVHHYIHSIHKTPVDEYFEVHGSSLDLTKVKYDTYGVGMPSDA  
GEGFSIENGRFVVVLRHSFSSIPRVSIVPDHGVIIIGTLPFTRWVPQESAITLSAGRM  
LIFRNGRISPK\*

>SPBIB\_v1\_150167|ID:27162679| TRAP transporter, 4TM/12TM fusion protein [Uncultured spirochete bib]  
MSDSRKT VPEENAAVDAQEILKKFDKEANYRTYVGGFAKVISAIAISFSVFQLYTAIFGV  
LDAMIQRSIHLSFGLTLIFLLYPTS KKWRSRSLHPVDAVLA VIGALAPMYIIVNYQKLVL  
RAGTATPLDIVFGVIGLLL VLEAARRVVG VPMV VIALVFIA YAFAGPYIPGKLAHRGASF  
ETLIQHLYFTTEGVFGIPLGVSSTFIFL FILFGAFLERTGLGQLFIDL ANAVAGWAAGGP  
AKVAVLSSALMGTVSGSSVANVVG TGSFTIPMMKRLGYKPEFAGAVEATASTGGQLMPPI  
MGAA AFLMAEFTNIPYARIIGAAVVPAILY YFGVWAGVHFEAKKSGLRGMNRDEL PKLKN  
IILERGH LIPLVAIIYLLVTGFTPMKAALWAIILSIASSWLKKSTRIPPIEIVRGLEAG  
ARAALGVLAATAACAGIIGVVTLTGLGLKLGSTLVELAGGRIVPTLFFTMITSLILGMGV  
PTTANYVITSTIAAPA VIMLLSKQAGLDPYAVAPASII LPAHMFAFYFGIADVT PPVAL  
AAFAGAGIAKANPMKTGINASKLAI AAFV PYIFVLNPQMLLFNVNAITFIWMLITSLVG  
IIAIAAAVNGWLITTLWYERLIGFAGGILLIYPGLTTDLMGLALVAVMAISQIVRARA

RALKAR\*

>SPBIB\_v1\_150168|ID:27162680| Aspartate kinase [Uncultured spirochete bib]

MKILKFGGTSVSGSPDAVRALVGIVKDSGERIIVVSAFSGITDSLLEAAKLASGGGEWRAI  
FETIANRHHSMIDALLEGSFSEPATAYVRSLLDELSSLLYGISLVRDLSARTLDLVASFG  
ERLSAFIVAQALSQAGIAAEPVDARQFIITDARFGSAHWLQAETERRALAFFSAFPRVAV  
VTGFIAATADGITTTLGRGGSDFTAGILGACLDAEEIQIWDVDGILTADPRAVPDAFVI  
PEISYLEAMEMSHFGAKVLHPPTILPAMAKGIPVRILNTFNPSPGSPGTKIVREAAPSSWPV  
RGIAAIPISISLLLLQGPGLPGVTGIAGRMFAALASAAVNVILITQGSSELSICCAVLPQD  
AENGARALKEEFKYEISTGTIQKPAIEKDLIIAVVGGEMMKHRVGISGRVFKALGRNGIN  
VVAIAQGSSELNISIVVSAQDRGKAMSAIHDAFFLAGVRTVNVFLVGTGLIGGTTLLAQVK  
AQHERLFDHSIRVRVAGIANSRLMLIDANGIDVSDWKTALAEERGEPTHLETFVRQLTHL  
NLPNACFCDCCTASDAPIRYETLLAASISIVTPNKRANSGLPLVRYQRLMRVAREMDVPYR  
YETTVGAGLPVIGTIQDLVASGDEIFKIEAVLSGTISFIFNNLGSDFEFKFSALVRQAKE  
LGYTEPDPRDLSARDIVRKTILAREAGFPLEEAGVRIEPLISKRIAQAPTVETCMVLL  
PEMDAEIEARRSNAARHGTVLRYVSAITKEGASLSLSEYGPESPFFSLTGTDNMNVITSK  
RYSQNPLVIRGPGAGADVTAGGVFADILKTAESYL\*

>SPBIB\_v1\_150169|ID:27162681|gcdB| Glutaconyl-CoA decarboxylase subunit beta [Uncultured spirochete bib]

MEAFFSHFISSTGFIAMTWGQLIMLTVSCILLYLGIVKEYEPLLLVPIAFGMLLANLPAS  
GITDGPKDGLVGGLIYYLYQGVLGIYPPILIFLGIGAMTDFGPLIANPWSLLLGAQAQLG  
IFIPFILAYYLGFDLKSCGSIAIIGGADGPTAIYVTSRLKPELLGPIAIAAYSIMALVPL  
IQPPIMKALTTKKERLVKMAQLREVSKAERVVFPILVTILIGLLLPAAVPLVGSMLMLGNL  
FRESGVTERLSDTAQHALINTLTIFLGVSVGSTASAVRFLNPQTLMIIGLGLFAFSCGTA  
GGVIFGKIMYWITKGVNPLIGSAGVSAVPMAARVSQVVGSKEDPTNFLLMHAMGPNVAG  
VIGSAVAAGVLLTVLG\*

>SPBIB\_v1\_150170|ID:27162682|gcdC| Glutaconyl-CoA decarboxylase subunit gamma [Uncultured spirochete bib]

MKHYRITVNGKTYEVTVEDLNRPGHSGGAAAVSQAPAAVSSAASLPAAPSAQPAAPSNG  
ETVVTVKSPMPGTVISFKVIAGQQVQRGDVLLLLLEAMKMENEIVAPQDGTVVVALRVPASA  
SVNTGDPLVDLA\*

>SPBIB\_v1\_150171|ID:27162683| protein of unknown function [Uncultured spirochete bib]

MTNPWMIMLVGVITVFVALFLIILFLLGFPKFFSALKKKEHKKLAPLPEIVEVTKKKAQA  
GLLSQSPAEDDEELIAVLTAAVAARGSELGSFAIAQVKQAAAEGGGFNTPVWGRVERLS  
RK\*

>SPBIB\_v1\_150172|ID:27162684|pccB| Propionyl-CoA carboxylase beta chain [Uncultured spirochete bib]

MEEKLRELEERQAKVRAGGGPKRVAQAQHDKGKMTARERIEMLLDPGTFVELDAFVEHRAT  
ELGMDKIDAPGEGVVTGYGLVNGRTRCVFAQDFTVIGGSLGEMHASKICKIMDLAVKIGC  
PCIGINDSGGARIQEGVDALSGYGEIFYRNTLASGVVPQISVIMGPCAGGAVYSPALTD  
VFMTEGTSNMFITGPQVIKAVTGEEVSSDLGGARVHSEVSGVAHFSFPDEQSTIEAIRK  
LLSYLPQNNVEDPPVAETGDDPNRIDEGLADLMPDSPNKPYDVRDIIARLVDAADFFEVQ  
PNYAKNIVTGFARLAGRAIGIIANQPKYLAGVLDINASDKATRIFIRFCDSFNIPLLTLD  
TAGYLPVGVQEHGGVIRHGAKLLYAYSEASVPKLTIVILRKAYGGAYIAMCSRHLGADQVF  
AWPTAEIAVMGPEGAANIIFKKEIEEAPDPAARKDKIEEYKRSFANPYKAAARGYVDDV  
IDPAHTRMRLCNALNMLLKGKQSMPSRKHGNIPV\*

>SPBIB\_v1\_150173|ID:27162685| conserved protein of unknown function [Uncultured spirochete bib]

MNTLKLHDHIGIAVEKIDAALPVWEGILSLPLHGIEEVADQKVKTAFMPIGESEIELLEST  
DSEGPICKFLAAKGQGVHHLAFRVANIEAALAELKAKGVRLIDETPRYGAGGARIAFIHP  
KATGGVLVELCERA\*

>SPBIB\_v1\_150174|ID:27162686| putative enzyme [Uncultured spirochete bib]

MYDLIRRCIEGDVRAVARLITLLESGDREAYAALYRLKDHAGRAQVIGITGPPGAGKSTL  
ADKLIAQFRSRGLKVGVLAVDPSSPFGGAILGDRLRMQGHATDPGVFIRSLAARGSLGG  
ISKATHAAIRVLDAAGYDIVLVETVGVGQSEIDIVRVADMVVLVSVPLGDDIQVIKAGI  
MEIGDIFVVKADRDRGADRVRREIRAMLELQAQLKRGQTPEGGPDTLAARAPEFLHHTGL  
AEGWQPKAGNESGAPGEKESITPKPGVLPEAGTVSAALVNQEAGTISAALIIPPVLKTI  
AETGDGVKELADAIFFSHFETLSRTGELERKRLESIRYQLGQFVSNEIVHLMSLPELAAAQ  
DELAHKVFSRKMVDVYSAGIALFHTIIEQGASHEHPQA\*

>SPBIB\_v1\_150175|ID:27162687|yliK| fragment of methylmalonyl-CoA mutase (part 2) [Uncultured spirochete bib]  
MERKIRVLIKPLDGHDRGAKVIARALRDAGMEVIYTGLRQTPEQIVSAAIQEDVDVIG  
LSILSGAHNHLFPRVVELLKQSGAENVLVFGGGVPEEDIPFLKSKGIAEVFGPGTPTSK  
TIEFIRANLKRPLN\*

>SPBIB\_v1\_150176|ID:27162688|yliK| fragment of methylmalonyl-CoA mutase (part 1) [Uncultured spirochete bib]  
MTDLEKLEQDFNTWTTKVEKANEEKYPERKKQFVTGNSAPVKRVYTPLDQKDFDYEKKGLGL  
PGEFPYTRGVQPTMYRGRWLWTRQYAGFGTAESNARYKYLLEQGQTGLSVAFDLPTQIG  
YDSHPLSEGEVGVGVAIDSLADMETLFGGIPLDKVSTSMNTINAPAAVLLAMYIAVAEK  
QGVASADKLNQTIQNDILKEYIARGTYIFPPAPSMRLITDIFEYCAKNVNPWNNTISISGYH  
IREAGSTAVQEVAFTLADGIAVEAAIKAGLDVDEFGPRLSFFFNHNDLFEEVAKFRAA  
RRVWAHIMRDRFGAKNPKSWMLRFHTQTGGSTLTAQQPDNNIIRVTLQALAAVLGGTQSL  
HTNSRDEALALPTEEA VRIALRTQQIIAYESGVAETVDPLAGSYYVESLTDRIETEVLQY  
IKRIDLGGAVKAIEQGYIQQEIQDSAYAWQMDVEKNERIIVGLNKFQVKENPPKGLLRV  
DPAVGERQKQKLAALRSSRDQGAVNATLAALRNAARSADNLMFPILEAVKAYATLGEICG  
VLRREEFGYKPNVMF\*

>SPBIB\_v1\_150177|ID:27162689|korC| 2-oxoglutarate synthase subunit KorC [Uncultured spirochete bib]  
MRVEFRLSGSGGQGLLLAGIVLADAAIQDGKNAVQTQSYGPEARGGSSKAEVVISDGDID  
YPKATEPDFLLALTLDAFRTYGPLMKKGIITDTSVAADLPSAGTRLEALTAGVPVITLP  
ILETASKKLGRAVVANMVALGVLGGLSGV ASPKALREAVRSRVPKGTEDLNLAALEAGLA  
LAEEAKAQLAASGVRPRA\*

>SPBIB\_v1\_150178|ID:27162690|korB| 2-oxoglutarate synthase subunit KorB [Uncultured spirochete bib]  
MAEFLSYFRQDRLPHIWCPGCGNGTGTGALVRAIDKLGIDKNNIVMVSGIGCSSRSVGYL  
DFDTLHTTHGRAIAFATGVKLARPLKVVITGDGDSAAIGGNHFIHAARRNIDITIII  
NNDTYGMTSGQASPMPHGMGLTTPYGNVEYNFDLCELAKAAGATYVARATTYHYVLE  
ELISKAIMHKGFVVEALSQCPTYFGRKNKIGGPVETLNWIKDQNTINVKAAAALPPEKRE  
GKILIGELHNVEKPEFTQQYLEVIAKVQRANPTYARNKGVPGCELNSD\*

>SPBIB\_v1\_150179|ID:27162691|korA| 2-oxoglutarate synthase subunit KorA [Uncultured spirochete bib]  
MAEKAKLMQGNEACTMAAIAAGLEFFAGYPITPSTEAEMCAEELPKVGGKFIQMEDEIG  
SISACIGASLTGAKAMTATSGPGFSLMQEAIGYASLCEIPVVIINVQRVGPSTGMPTSPA  
QGDLMQARWGTHGDHPVIALVPGNVKECYELTFRAFELSEKYRVPVIVLSDEVIGHMREK  
VVLDPDPANYKIPVRAMPASPAGYKPYAADPNGGVPLMAPFGMGYRWHCTGLFHDENGAPS  
SKPEVASTLMRRLHVKVGSRAEELADYFAEGLDDCELA VVSFGSSAMAALSAVRRARSEG  
HKVGMLRLKTVWPFPTKTVRGLLSSAKKIIVPEMNLGQLALEVERAAGCDRVPVIRLGKVN  
GELFHPDEVFAAIKEAL\*

>SPBIB\_v1\_150180|ID:27162692| conserved protein of unknown function [Uncultured spirochete bib]  
MAKYIKIRDVTLRDGQQSQFATRMNNEQVKA VLDDYRASHFYAMEVWGGAVPDSVMRYLN  
EDPWHRLGTIKQGIGDASKLTALSRGRNLFGYNPYPDSVIEGFCKNAIASGVDIMRIFDA  
LNDIDNMKSSIRFVKEAGGLADCAVCYTVDPHFSFRDRVNALFSGKKIPPKIFTVDYYVK  
KAKELAALGADMITIKDMAGLIDPVA AQAQLIKALKNELEIPVDLHCTHCTPGFGVASLLAA  
MVNGVDIVDTAVLSFGGPAAPAYEIIIRVFADRLGIATGVDNAAVARIDRRLREIRKELS  
AYDQYKKLPPELDLSKDSLPPQVSKLFDDALEAAVGGKYQKSLAICQEIEKAFNYPEPDE  
IVRHAQIPGGMYTNMMAQLKEAKLEQHLNEVLHIVPRVRLDSGLPPLVTPTSQIVGVQAV  
NCVIAINQGDLYTNVSKNFAELIAGSYGKTPWPVDPEFRFKICGTREETPYDTSKYKPQ  
PNPPVAEAGGALLAMNEKEQLLLELFPVATKFLRNKRIE EWKAAHP EEA AKAEASA AVR  
AAGMAAGSAPGGQEDSVLSIYESADYEPADGESPEFWEEAPGWAGG\*

>SPBIB\_v1\_150181|ID:27162693| conserved protein of unknown function [Uncultured spirochete bib]  
MQQFPFCPNPRCRWHKEAPKGWAKAKGFYTTKAFGRIFQFCRACHTTFSSQTFSLSY  
VKRPIPLPDVLRITSGESLRAISRNLVSLRLVTNRIDRLARQAIGLHAQALSARVSTD  
DICIDGFVSFDGSQYFPSEIPIAITAHSQFVLD FSHASRRRS GSMTPAQKEKASLLYARC  
PLERGAIAQSFRETLESALALQPPSPHRPFVLITDEKPDYRRVLRLEAFRNQTEERRLV  
HWTIWSKLPRTIHNPLFSSNYIDREL RKDLAHHHRET VCFNRNV ANGMHLALYLLAHNY  
LKPFIRAPRGRSGSHAEAA GIPASWVRQFAHSLTGGMRMFLSRLRLSATLKRTEWEGW  
KTPGKEKTEYLPKYAFM\*

>SPBIB\_v1\_150182|ID:27162694|rtcB| tRNA-splicing ligase RtcB [Uncultured spirochete bib]

MQIERIDPFTCLIPAHGDMRVPARLYVSDQLFSLKQDKALDQLVNVARLPGIVSYALGM  
PDMHQGFAPIGGVAAFDVDEGVVSPGGVGFINDCGVRVILTSLREEEVRPKLDAIGKKL  
FARVPSGLGSKGLIRLSAKEARAAMAEGVPWALGKGFAEPADLRAIESHGCLGSDPLAV  
SDEAVNRGKEEFGTLGAGNHFLEIDRVEQIFDPETAQKFSLFEGQVLVWIHTGSRGLGHQ  
IATDYIARMRPKMAQYKLELFEHDFVSIPLRDPLAGEYLAAMAAAANFAWINRQMITHAV  
REVFSEEFGKPADSLGMRLLYDVAHNIAKFEDHIVGKSESQTRGTISAALTSRLLVHRK  
GATRAFPAGHPELLDLAHDAGQPVLLPGDMLRGSYILVGTERAMRESFGSVAHGAGRKMS  
RHAAAKEVSFEALS RQMGQKVRLLAADKRLACEEAPAAAYKDVDVAVVETVTGSGLARVVA  
RTRPLLVIK\*

>SPBIB\_v1\_150183|ID:27162695| putative Glutamate racemase [Uncultured spirochete bib]  
MGGLTVVRSCLAGVPLDIVYVGDNANVPYGNRPLTEIVALTERMLDVLDRRGVEAVAIA  
CNTISATVDMLESRSKIPLVDIIRPAARAMAGLSELHVGLFATEFTVQSGLHAKLVRELN  
PSVEVHGVASARLAALIDSPWDEAAIREEIASMIKMRRVGPVRTVLLGCTHYPIVQNV  
FEELAPDMRFIDPAGLQANEVLRVAVGATAPAKSPQLASEESAISLEVITSGDPAA YRQM  
LDKLGIPPAQRFTQL\*

>SPBIB\_v1\_150184|ID:27162696| conserved exported protein of unknown function [Uncultured spirochete bib]  
MKTFKCRGQTPIFYFMIAALMLTG VQGAWAQMPGSPAPQLPSSPSAVEKRSIRVQGGQASM  
SVEPDIAMLT LGVETQSDTAAKAQQLADRASKVLAALTGAGIDRAKIKTSYYRVSPVYS  
TKQDKQNVIIQYKAETTIQVEISDIPAMAGLVDLTMNAGANAVRSLNFRKNMEAFKAQL  
IEAACKDAQLKAQAALRGLAGNGAGLRLGAPISVDVQDSFSARNAGEAMMFKAAASPDFV  
SAGELEISVAVAVEFEILVNSSH\*

>SPBIB\_v1\_150185|ID:27162697| putative Esterase/lipase [Uncultured spirochete bib]  
MIFIHRQPQSARSMLLERAFRRAGVKESSDSEQPRFITRQYAKSLLSAEPPLHIRARLGV  
QSIAVAGSRVHVLTPRFEGCARCILYLHGGSYVATFTRQHWNFLAKLAERTKSVIIAPDY  
PLAPEHRWADAYRMLFALWESIGLALPHKDVVLMGDSAGGGLALGFVQALRDAHLTMPAS  
VIMLSPWLDVTMENPHIQTLDEVDPFLSVEALRKAGAAWAGGSNPRRMEISPIYGHFEG  
PPMSLFIGTKDILWADCRRLRDICLV TGAHLDY YEYEHMMHVWMLMPIRESKQALDQIAG  
ILTTQPECASHDAVQKFKTWGQTPS\*

>SPBIB\_v1\_150186|ID:27162698| protein of unknown function [Uncultured spirochete bib]  
MSRERFFDDRQRIIDAAVSLISEIGYENFSTRRLAAKLGISPMTLYNYFENKEEIVQATI  
ADAYGKALSAIQNELKEYFEGDVACPLKGFVEIGRKLKDFSVQYPKMYALLFMMDLRPYT  
DHPSIQSRYEYAFRKTAEERLLDKSIEEELHRHIYLYEVLGALVRNFHSGCGPVDEQTFE  
AHLALAYDRLLKPFEQYFAECEKAR\*

>SPBIB\_v1\_150187|ID:27162699| YbaK/prolyl-tRNA synthetase associated region [Uncultured spirochete bib]  
MIPEKVQKILDRHNLKALEFEPGSTPTAETAQRIGVQTGQIAKSLLFKGKSGRVAMIVC  
AGDARISSRKMALFGEKMSMTDADETFALTGFRPGGVC PFGIENIEIFIDESLARWDTI  
YPAAGNDATGVPITVQILIQATNGQPCDLCE\*

>SPBIB\_v1\_150188|ID:27162700| conserved membrane protein of unknown function [Uncultured spirochete bib]  
MQYSVVVTSAMLSALTMPFILNFAHSRKL YDIAGGRKNHNGNIPRLGGLGMFLAFATMVA  
AFSIVQTGPVSRELWSRGDKLWPFVAVGLMHTIGLMDLKAQPAPLKLGVQVLAALVVA  
LAGYRFRGFGFRADVLTESWSWLSIVLSVGWIVGVANAINFIDGLDGLAGSISFIAAMAF  
GIFYYQSGDASSFLCLSVAGAAVGLFFNFPAPRAKIFMGDSGSLFLGFCLAVMPFLGQ  
AQAGAVGIGAGTQGAQAGLGLIPSITLLGLPVFDALRVIALRVREGVSPMKADRQHIHYL  
FADSGYRPLAVIGVLDVAAIMLVAAVFLAASMPQSLGYLLMLISIGILFILFRYAMSLKP  
DKAS\*

>SPBIB\_v1\_150189|ID:27162701| conserved exported protein of unknown function [Uncultured spirochete bib]  
MRRRITQAAVFLALIAILAACQISSPVVPTKISLKPFLSLIVGESETLTPVVEPANASV  
EDLDWESDDSSIATVDSTGKVTAIAEGD TVIRVATQYGLKAECDVYVATVSVRDVTLDKT  
SLTLKESHMYTLVATVLP SNATNKNVTWSTSNASVVKLVKNDAGKEDGTIFANAEGTAVI  
TVTTVDGNTATCTVTVIKEQ\*

>SPBIB\_v1\_150190|ID:27162702| protein of unknown function [Uncultured spirochete bib]  
MRLKKGLRLIFVGGTTGLEIWHAAANIAIKARKTAACVILLRMVFALLIEIFYLLNKYIGT  
LRISS\*

>SPBIB\_v1\_150191|ID:27162703| protein of unknown function [Uncultured spirochete bib]



LGKNQYELGASLYGNNARFSSKLLXX

>SPBIB\_v1\_160001|ID:27162704| protein of unknown function [Uncultured spirochete bib]  
MKSTLHESEYSLLEAIYASIAQKEASGALSQRELAQASGLSLGMTNALLKRFVERGWIKL  
SHLNKRKMLYALTAEGIEEISRRVVDYFSRASHNAALYRKRIDAFVRAVAEQGYTALELV  
GPDELDFLFDYACEKNGLSFLKDRKGRHFSFASDQKLIVVMTGDSEIESAALPAGTLAVE  
FSEILALSEQDS\*

>SPBIB\_v1\_160002|ID:27162705| putative Soluble ligand binding domain protein [Uncultured spirochete bib]  
VVEVSKAVRIVSIEGEVRRPGRYQLLPGEVVKELVSYYGDALESGKTDLVVLTRKATSQ  
KPESESVVF DLGGKGLPELMDGDRVRIPSREEYLPVYIEGAVAGDQLALSGANTAQTLS  
SNNQTL SNKNPTLSTTDQTVSGTDQTTT SKDQSLSSANQTLSSSNQNAVQATYAIRAPF  
RKGLSISLLRPMKDKILSSADLAHAFIIRKGNQDQNYIDLERLLYANDLRYDFELQPED  
RIVIPFGSMSVFVTGEVTKSSWVTITGLTRLRDVIQPFTRYSSIRDVTVKNQDGIKTY  
DLFKADRYGDLSDPPLRPGDEIRILPFKNLITIQGEVKRPGTYQLLPGEGLKELVERYA  
DGFTEKANLSRLTIVHYLSDASPVGKAKQFDYTKNPNMPLRLYDEITVPSMQELLPVVWF  
EGAVGVGSGTSTPETSQRTPYTFPPGETVSSQAALANRKLFSAVSDLSNAYLLRSDGSRK  
VNLARFIYDYDLAGDVALQPGDTIIVPFRQFFVSVSGAVRYPGRYPYIPDREWSYYIGLA  
GGFDTEKNSGQKITIYDAKSQKVDQANRMIQPEDNIVAASNSFTYQLMRISTILSTVLSL  
VAIIVNLTGLKL\*

>SPBIB\_v1\_170001|ID:27162706| protein of unknown function [Uncultured spirochete bib]  
MHSRHLGGLFPCDSRRLHRRIDRQNPQGRDGGEVQSDQLRKGEYVMKKFLILIMALAVA  
VSAWGQFTLPSGTTSTGTTSTGTTSSQSALGGQSTQGIDTTQLLQAAGASSSTSQKTSLS  
VTVPE SQVRAMLAMSTPEYPVTPGDVYALS YLRATQQDTISLLVEGDGSINAGFLGRIQT  
SGMTFRALKEMLEKVIASYPSSNPSLVIVSTGLFSVNIRGEVLSSQIFTAWGLTRLSEA  
VKGLATPYASLRDVIVRGRDGASKAYDLFKADRFGDPSQDPLLRPGDVIEVKKADRILL  
EGQVRRPGIYQLLPGEVVGELVRVYGDGTLVSAKTDITVLTHKASAEKPASESIVFDLIG  
SSLPALVDGDTV RVVSREEYLPV VXVEGAVQAGTVLISESAVSQAGTGGTSVAQGTXX

>SPBIB\_v1\_170002|ID:27162707| conserved protein of unknown function [Uncultured spirochete bib]  
MTEQNECMDNAMNRAPAAQPAPSLQSPEDDDEISLVDLAAVLWKRKWLIVGITVTA VIGV  
LAYAIGSLMLPPEKSYLPNVYAKATMLIQTSSSSSLAAALSSSGLASLAGLNASAGNTN  
GALAEVLATSNSTLDALNAKFNAERNKARKPKTKDEKPLISDIRESIKKNSAKLDAK  
TNLFVVS YTDIDPAFAKEVVDEVVRLLSERFAVLGGNKALEQKALLEKLAEVDTA VKNL  
EAQVKAFQNKYGVIVQVEALATEQITILARLRSELIMKEMEIANYQKISNINDPVM TQLKN  
ERDGILAKIKEIETGVGSGSRVMPSQKELPTIAFEYARLQRDLAVQTEVFKMLTQQYELA  
KLNASGQEPVFQILEMAEVPDKKSGPSRGMICIVATLAAFFLAILVAFIAESIDKIRKDP  
ETVARFKAISSGKESM\*

>SPBIB\_v1\_170003|ID:27162708| protein of unknown function [Uncultured spirochete bib]  
MSILTRLFFVLLADERIELFELDFIFGADEGGVWGVDDDDVLAAEKGDDEV RG VGGDGEV  
AGTFDEEGFGSVLGGWCALGVPGAARRGEHGAV ALRIGVREGAVGVVP\*

>SPBIB\_v1\_170004|ID:27162709|manC| Mannose-1-phosphate guanylyltransferase [Uncultured spirochete bib]  
MSRYAVILAGGSGVRLWPLSRESMPKQLIPVLKGSLLAAFERLEGVIPPERRWACGGA  
RYETVVRTKIPAIGRYIGEPEGRDTLAAIALSCALVRKEAPDAAVAFLTSDHVIEPVERF  
REALRAAFATAEAHPDTLMTFGVAPTFAATGYGYLELGEQLRKRGS DPFLQMAAEEAGAN  
AAIRRVRRFREKPD LATAERFVAEGPAHYLWNSGMFVFKASRLLELLAKYEP AIAEAIER  
IARAESSEEQAALMRDIYPTITKKSVDY GIMEPASQSDSVTIACVPLDLEWKDIGSWNAY  
GSLADPDPQNGAMLAAARSPRHAEGTPTAQDRPETL FVESTGNLAVTTDPSHLIAFLGC  
KDIVVVHTPDATL VCPKNKVEELKKLYPFV SQQHKE\*

>SPBIB\_v1\_170005|ID:27162710| conserved protein of unknown function [Uncultured spirochete bib]  
MTTLIPRPALMERIENAFAITPIVTL LGARQCGKTTIARIIAQKTQAPIFDLED PADDAA  
LSHPMLALS DKRGLIVIDEVQRRPELFPILRVLVDRPDNAARFLLGSASPHLVRGVSES  
LAGRTSFVDMQGFSLDEVGSEAWQKLWLRGGFPRSWLADSDAASLEWRKGFIRTF LERDI  
PQLGISIPAAGLSRFWTMIAHYHGQVWNSSVLARSLGISDKTVTRYLEILEGTFLVRRLP  
PWYENLGKRLVKSPKVYLRDSGILHALLGIADMDGLLSHPSV GASWEGYALETLLSRFPG  
AQASFYATYS GAELDLVLDLGTTRYGFEMKLNQAPTLRSMTIALEDLGLSHLYVVYPGT  
KTYPLAESITAVPLQSVPEIAE\*

>SPBIB\_v1\_170006|ID:27162711| conserved protein of unknown function [Uncultured spirochete bib]  
MIPRIELASLLDDLSVFPVAVALLGARQAGKTTLAMEVQKLRDALYLDLESERDRAKLAEP  
ELYLSEHLDRVLILDEIHRVQVLPVLRGLIDQRRRAGRAGLFLLLGSQSPELLRQTGE  
SLAGRIAYRELTPFWVLEVPKGQDDRLWVRGGFPESFLAESSARSLRWRQDFIRTYLERD  
IRQFDVRLMPETLRRLWVMLAYLQGSVMVNAQLARNVDVDVKTINRYLDLLTDLFLLRRL  
QPWHVNIKRLTKAPKLYIRDSGLSHALLGIEDREALLSHPVVGPSWEGFVIENLLTAAG  
ANYQSYYYRTASGAEIDLVLVPPDQRLWAVEIKRSLTPKPERGFYIACEDLKPAQRVYVY  
PGDERFPLGHDTEAISLRELAGLLRGG\*

>SPBIB\_v1\_170007|ID:27162712|mazF| mRNA interferase MazF6 [Uncultured spirochete bib]  
MMRGELWWADFGLPFGSEPGFRRPVVILQDDAFNTSNIHTTIIVPLTTNMALAEAPGNV  
LPKDESSLKDSVLVVSQLSAVDKQRLIERIGTLKRQTL EEVEEGIKLILNLT\*

>SPBIB\_v1\_170008|ID:27162713| Ribbon-helix-helix domain protein [Uncultured spirochete bib]  
MKT AISLPEGLYKEAEKTA KSLGIPRSQ LFAKALQE FITRHAKDNIT EDLNKVYSNQKQD  
VHNLNVENASIESIRELTKND AW\*

>SPBIB\_v1\_170009|ID:27162714| putative ATPase (AAA+ superfamily) [Uncultured spirochete bib]  
MIQRPLYLEKIRPFMNTDVVKVLTGIRRCGKSVMLELIQQLVQNGIAPSQIIAINFESQ  
ALPFPRDIQGA YTYIKA AVAKAAVTATA ANGEATRSGRKIYFLDEIQELEGWERLVNSC  
MIDFDADIYITGSNATMLSGELATYLGGRYVEIKVYPFSFREVLDMLSAGGSQ LSEAEAF  
RRYL VFGGMPFL YRYAFDDASTLQYLNDFDSIILKDIAQRNHIRDIDKLRLLILYLVAT  
TGNTFSARSVM DYLNKNEKRSISTETIYNYIEYCKEACL IHMVPREDLIGKRLSTQEKIY  
LVDHGIREALYGN NQRDINQ TLENIVF MELVRRGYEVTIGKQRSLEVDFCARKGGTKVYL  
QVAYLLADDATVEREFS ALETIPDNYPKFVITMDEIDRSRNGIQHYNIRRFLLEAR\*

>SPBIB\_v1\_170010|ID:27162715| ATPase (fragment) [Uncultured spirochete bib]  
MELRRLTSDIYFFD NAAECDFV VNAHREKPLCMQVCSHLNHDNEAREIKGLMKALSFFD  
LAEGYIITAAARDEIITQGK KLHVIPAWEDLAATCGLSR\*

>SPBIB\_v1\_170011|ID:27162716| protein of unknown function [Uncultured spirochete bib]  
MSIDNKVAFSRVVKKIIDVAGEAAQFHEYEIFMSFISL LLEYMFQ\*

>SPBIB\_v1\_170012|ID:27162717| conserved protein of unknown function [Uncultured spirochete bib]  
MPKVRPNPGTRSVQWRLVLCEGAKDKSESAYFKALINDRRNPDRLEVKVVDTKKNTAR  
ELVREAKKLKATNKDQVWVVFDDKDG YTLHAQAFDQAAANGIKIAFSSICFEY WLLLHFGY  
TTRPFANCSELIA YIRTEYGYDYDKSSPLTYAKTKHLLAQAKTNAQRCKRYQLQSNPADF  
PIYEMNPYTNVDEL VTAIEQFSVEEA\*

>SPBIB\_v1\_170013|ID:27162718| conserved protein of unknown function [Uncultured spirochete bib]  
MLIDFTLENYLSFKDKATISLVVPGWKEPEHTRYVLEVERGKYALS PFAAIYGQNAAGKS  
NVIKALMDFVNLVLYSHTLGIDAPIPSYKPYKLDISRQSAPILFETEFIAEGIRYLLNVI  
FDRNSILQEELVYYPQGR RALLYSRKKGESIRFGTGFKGTTKKGLEQFLRPNALFLSTAVN  
LSNEQLRPVYKYFQTKYRFHVAMDSSEHPIMGTTLTLLAEDPIKREGYKKAILSFLNAAD  
ISVKDVVIRKDETLIKNIVFPDIPQVVKDKFIENLVNRPFLGHTLYKGAESMGENVLFD  
LGKEESGGTIKMYELAGEVIESLKS GGVLLIDEFSSGLHPQLCEFIVGLFRDRSINTKGA  
QLIVTSHDTNLMARDDIYRDELWL VDRDSHGTS ELYSINDFSKDEV RKGNTNLEK WYLDGR  
FKA VPSIDPSAFKLEVSD\*

>SPBIB\_v1\_170014|ID:27162719| conserved protein of unknown function [Uncultured spirochete bib]  
MPTLQVRDLPEDVYVQISYLA EKEHRSLAQESIVLLKEGIAAKLGNKERRRKLLEKMSDL  
TVDGKAFPDPVDLIREDRER\*

>SPBIB\_v1\_170015|ID:27162720| conserved protein of unknown function [Uncultured spirochete bib]  
MIIVLDASAAVEIALNRAHSTQLREILRKADLV LAPDTFPSEITNVFWKYASFSAMPIDQ  
CEKGIDYCIDLIDEYREIKTMCREVFSESLNNNHPSYDLFYLV LARRFNASILTIDKKMK  
ERAQAMKIKLAYEDS\*

>SPBIB\_v1\_170016|ID:27162721|rmlB| dTDP-glucose 4,6 dehydratase, NAD(P)-binding [Uncultured spirochete bib]  
MRSLSLILVTGGAGFIGSNFIHWLFAQPEFAGR VINLDALTYAGNLENLADIEARYGKGA  
GGLGAVPRYVVFVQGDICDRPLIERLFAEY GIDTVVHFAAESHVDRSILGPEAFVRTNVLG  
TYTLLDVARQAWCAPTGGMREDVLFHHVSTDE VFGSLGEEGYFTESTPYDPRSPYSASKA  
ASDHLAKAYHHTYGLPLT LSNCSNNGPYQFPEKLIPLMILNMLEGKPLPVYGDGRNIRD  
WLYVEDHNEAVWTIMRKGQSGRTYNIGGENEWENIRLLERLIELVAEEARLDIARLRGLI

TYVKDRPGHDRRYAIDCTRLKTELGWHQRATFDEGLRATVRWYLDHREWVEHVRSWAYRA  
WLEQNYARRV\*

>SPBIB\_v1\_170017|ID:27162722| conserved protein of unknown function [Uncultured spirochete bib]  
MATNLAIDDRLLNEALEIGGYKSKKDTVNAALEEFIKRRKTNDLINIFGTIEYDSSYDYK  
KMRSR\*

>SPBIB\_v1\_170018|ID:27162723| conserved protein of unknown function [Uncultured spirochete bib]  
MKRVLVDTSVWVSLALRKKKEWTKEEQLVVDHLSKLRNLNVVLIGPIRQEILSGISQKEKF  
DLLKEKLSIFEDHAIDMHDYELAAEFYNECRHHGIQGSHIDYLLCAFAVNHDLTIFTLDK  
DFQNYKEYLNIQLENFV\*

>SPBIB\_v1\_170019|ID:27162724| putative Glycosyl transferase group 1 [Uncultured spirochete bib]  
MKIAFLTQYYPVSDSTRSLYSDLMDIEISSFGHEITVFRSEEERVFGRPEVSSRKNITIVS  
VPTGRVTKTNIMIKTANILLTEPRYL GAMRMHYAGSIPDMIIVTTPITFCSAASYRKK  
GSMVYLLKDIQPQNAVLDGMMKKEVLSYFFRAKEKKLYKNADVIGCMSEENKKYLLHH  
NLFLRNKKIEINPNSIKPSTFQIDAKQGDELLREYKIPREKIKIYGGNLGKPGQIDFLL  
EVLDKSKEIENVHFIICGSGTEYSKLEKFKVTHPDHPITLIKYLKNSRYRLLLSQMDIGL  
IFLDRRFTIPNFPQRLDYDFDLPVLAATDKNTDFGKMLINNKCGLWLESGLDIDAFMKN  
LEYLVSNPDIRISMGKNGRALLDSEFSIKKSAQLIIDKFNLLSDPIS\*

>SPBIB\_v1\_170020|ID:27162725| putative UDP-N-acetylglucosamine 2-epimerase [Uncultured spirochete bib]  
MKTCLKVVTVIGTRPEIIRLSEVIRACDKAFDHILVHTGQNWDTLNEIFFKDLELRAPD  
RYLNVVGADLGETMGNIIAASYKMLKEIQPDALLVLGDTNSALCAIPAKRLKIPIFHMEA  
GNRCFDQNVPEEINRKIVDHIADINLPYTEHSRRYLLAEGFRKEHIFVTGSPMPEVIHRN  
MEKIKSSKALETYGIERNYFVLSMHREENIDIEYKFNGLVKALDAIAETYGLPIIFSTH  
PRTWKRLEAAGIKLNPLIKQVKPLSFTDYCRLQVDAKCVISDSGTLSEESAILRFPVLL  
RNSTERPEAVDKGSIVIGGYTAESLVQSIALAIDFFDRKDHRSADYVDEDVSAKVVKIIG  
GYTPIIKKVIWNK\*

>SPBIB\_v1\_170021|ID:27162726| putative NAD-dependent epimerase/dehydratase [Uncultured spirochete bib]  
VRILVTGANGFIGKNLLARLGREKDFEILPFDVENREEDLYEYLKNADRIVHLAGINRPL  
TPEEYMQGNFGLTSRIAFLKQNKQIPVIFSSIIHAERDNEYARSKRAAEDRLKLYAER  
TGASVSVFRFANVFGKWCPRPNYNSAVATFCHNIAHELPIITINDPSASLRLIYIDDVDAI  
VRELEHPYEGFAFVDAGPVYETTGVKVAEQICMLHEYRPGKGFVPDFSDFLKKLNTTYLS  
YVETDKLALPEIKSDNRGWLFELMKSPHAGQIFVSTTRPGFIRGNHYHDTKVEKFCLVK  
GRARILLRKIDAHEKIIYDVDDSRIRIVDIPPGYTHSIENTGSEDCIVLFWANEIFDPSR  
PDTYVLEV\*

>SPBIB\_v1\_170022|ID:27162727|capD| UDP-glucose 4-epimerase [Uncultured spirochete bib]  
MKASSTLMITGGTGSFGNAVLRKYLKTDIKEIRIFSRDEKKQDDMRHLYKDPRVKYYIGD  
VRDIESVRSIAKGVYIFHAAALKQVPSCEFYPVEAVKTNVLGANNVLTAAIEEGVKRVI  
VLSTDKAVYPINAMGMSKALMEKVMIAKSRELDNGKQVFCGTRYGNVMASRGSVIPLFIE  
QIMQGKPITITDPEMTRFLLHLDEAVELVEYAFEHGKNGDIFVKKAPASTLADLATALKE  
LLHADNEVKIIGTRHGEKLYETLVNREEMAKAEDLDGYRIPADTRDLNYDKYFSNGDRK  
VQEVVEYTSHTTRLDVEGVKLLLLTDCVQDAMKERGLL\*

>SPBIB\_v1\_170023|ID:27162728| conserved protein of unknown function [Uncultured spirochete bib]  
MKILQINSVFNYGSTGKIVEQLNSLIMKQGWTSYVAYGRHFHNSILKFKFSSTLEVIIN  
ILETRIFDNHGFQTQHATKCLVSYIEKIKPDVVHIHNLHGYYINIQLFKYLKNSSLPVI  
ITLHDCWTFTHCAHFDYIGCEKWKHEHCMKCPQIRSYPASFFIDRSYKNFELKRELFNSI  
SNLTIVPVSEWINGLVQQSFLASKSRVVIKNGVNLDFKPLNSRQSIINKYNLQGRYIIL  
AVASIWSARKGLNDILCIADNIGNEYLFIVGDRINKVASKRSNVKIIRKTEDQEELVEL  
YSAADLFINPTYEDTLPTTNIHALACGTPVLTNTGGSPETIDSETGFIVPKGDIDAMIQ  
VIRSFQKQKDSMTVACRKRKAEKYFNKDERFMDYIKLYERILKGEK\*

>SPBIB\_v1\_170024|ID:27162729| putative glycosyltransferase EpsF [Uncultured spirochete bib]  
MINKIKILHIVSDLNSGGVENMLYNYINYIDNSKFDIAFVSHSYGGMINDQLLKAGFRVF  
YVTPRKKNFKNILDLWKYMHSDNWDIVHSHINQMSAIPILLARISGIRVRIAHAGSKI  
YNDKIKKIIYNILSKIILYNANYLMACGTDAAVRVFGKRIVRQKKVIYLNKNAIDLEKFSY  
NKKSAQYLRNLGINERYIILHVARLSEEKNHIFSIEVFCCLIEKNPNMRLLIIGEGPLK  
EKLKQKVLLGLDNKVSFLGARKDVSSFMSLADCLLLPSFHEGLPLVPIEAQANGLQCYL

SKNVPEEVVLTEKACRLDLSLGPVWAEYIYNNLSKERISDKKIIQKAGYDIKLAACKLE  
NFYIVSATKMGKILYLSTLFNC\*

>SPBIB\_v1\_170025|ID:27162730| membrane protein of unknown function [Uncultured spirochete bib]  
MSNIYNIKKEKISYYLSILCMITIFNTDSIRVFGNLSIFYIILILYLFYELFSGKIFLKH  
INKYINIIGISSVGFIIINILISDLFAKELNIFVIIGNIYPLIGTIIFLFLINEDNKKYFV  
DYSVYTNIFYISCQIHAIYGLLQAILFIFFGIRTNNVRSILNLRVSGLFPDANIYSFSV  
LMALSFLLSKENKNSNIITIFRKILIIINLIVIFLTGSRTAFIVAILIIILNFYFKIKN  
IKYKIMFIFFLLFLIIININNIINLIDYYTYNILGRNIDVESDIRISILWKTALEIFFKH  
PLIGAGTDAVMRQTGTLAHNMILALLSDRGIIGTLIYLFPLIYFLKAKKGNKENILMVI  
SYLLASMGISNWNLRIPILLFFNIWELEINRK\*

>SPBIB\_v1\_170026|ID:27162731| conserved protein of unknown function [Uncultured spirochete bib]  
MKVLLISYFFAPQNTIAAVRTTKIAKYLRILGYDVEVVCGPPTFIDPILKSDLKEIKKLN  
VVHGLKMYEKKSKEFINNNVYKNSILKKILRKIKSILYKVLNPPPVYLAFLNSLIWVY  
NARKILTNKIFYDYDISSYGPISGSHILGLYLKLRHKKIFWIADYRDPMIDDKQKSTIRF  
IYSIYQYLSLKYADISLCVSKGLKEELASLQANAKLYIITNGYDNEDMSFLNQEQLNKNK  
LIFSAGSMYAGKRDLSPLFSILNELAIEKKIDIKLIKILYMGNEFSTIKEMAKPYELDE  
ILVDLGFVSRDKALNILNSDVLLLASWNTKKSQGILTGKIYEMILLKKPILAFINGYAK  
NSELKEIIVKLNNGGFVYEEGDKDSYNSIKDKIASLYKQKFESFFISQEYNMEFRAKYDYK  
NIVKTLNIIHDNKK\*

>SPBIB\_v1\_170027|ID:27162732|wbpA| UDP-N-acetyl-D-glucosamine 6-dehydrogenase [Uncultured spirochete bib]  
MTLSEQLLEKIEKNTVKVGIIGLGYVGLPLAVSFARKGISVLGFSEKKAQAVNEGRNY  
IGDVDDTELARLVQEGHLSATIDFTRIAECDAVIICVPTPLDKFKKPDMSYIERACVDIG  
RNMHRGTFISLESTTYPTTTEEFMKPIIERESGMKEGVDFWLCFSPERVDPGNKTYKTDN  
TPKVVGGLGEEAQKIALALYGKAIQYLYPVSSPRAAEMVKILENTYRLVNISLINELALL  
AGKMQINIWEVIEAAKTKPYGFQAFYPPGIGGHCIPLDPFYLEYVAKGLNFDLTMIDAA  
GKINNLQPYRMMNKIAFALNRHKKPMNGSTILFLGVA YKPDIDDARESPALEVMSLVAHK  
GAKVQYHDPYIPEVTDEHGRHWQGVLSDEILASADCVVFTTNHSCFDIEHIVEKANLVV  
DMRNAVERVNIENEKVFKL\*

>SPBIB\_v1\_170028|ID:27162733|wbpD| UDP-2-acetamido-3-amino-2,3-dideoxy-D-glucuronate N-acetyltransferase  
[Uncultured spirochete bib]  
MRNNELIEMPAAGGGIYYRHESYVDEGAQVGEGETKIWHFHVSHVMAGARIGARCSLGQNVN  
VGGRAVLGNTVKVQNNVSIYDDVIIIEDEVFCGSPMVFTNVINPRAFVERKHEYQETRVKR  
GASIGANATIVCGVTLGEYCFVGAGSVVTKDVPA YGLVYGSPARQHGWCRCGVKLGEDL  
VCPECGKRFKNEKGLEERV\*

>SPBIB\_v1\_170029|ID:27162734| putative nucleic-acid-binding protein [Uncultured spirochete bib]  
MAKR VYLDANVLMAMFRGTHDIAHKA FEVINDNEIEIVCSDALWLELMPKPLFNKNQEEV  
EFYQAIQFDQSEYAKWDLVDLNDAKNIAKSYGIAAMD AIIHISTAINKKVDVFYTNERDTP  
MFRVSDIKIISLATA\*

>SPBIB\_v1\_170030|ID:27162735| protein of unknown function [Uncultured spirochete bib]  
MNAVSYKEKDMSSFFDTSRIYAYAFHRNKEVSKVYHFVYDDAFDDLSTNATSIRYILSKN  
VVNRESNIPTSIVPKTELVRKLLAIRKKYMEGGKLLSLEEIAEEIQNRRGGLNNGQASI  
P\*

>SPBIB\_v1\_170031|ID:27162736| conserved protein of unknown function [Uncultured spirochete bib]  
MEVKDLPAYLERSPLVEAIWEIRFNVPALSIGDLLPGIVFVHLDASHKGYVLNQLPFVQ  
IPRDIIDTNEFNKFKQAKYRIESTKSPYLHYHIGEHMVSLNCRKPYEGWGAFKNKIIELIGI  
LKRAPFEFIEVKPSLR YINFLPQNVIPSLPWLRIKLNIGDFLITMTPLQIRAE L PETEC  
THTVQIVHPAQLVMHEAD AENKGIIVDIDSVLNNTQHSLDDTVAQIEM LHAKNKEFFFHQ  
ILTEDAIEKFGPKYTEEASV\*

>SPBIB\_v1\_170032|ID:27162737|degT| Pleiotropic regulatory protein [Uncultured spirochete bib]  
MNVPFYTTSTREYQNRKA EFDAAVRGVMERGFILGEEVA AFEREA AEFLGARYAVGVASG  
SDALVIGSDILDFKDGAEVLTPTFTFFASTSCVARLGGKPIVDMDPKTLNMDLADAERK  
VTKKTVGIIPVHLFVQPTPMQKVMDFARAHGLKVLEDAEAEAWGMESRVDG SWKKAGTIGD  
IGIY SFFPTKTLGAYGDAGLMVTNDEELYKKIKSYRVHGSSVKYHHDYIGYNSRLD TLQA  
AILRVKLRQTKEAIAARARHAAHYTERLSRLPEVRIPRVAGGNRGVYYVYNILVPQRDDL

AAFLKEKGIGTSIYYPLPLHLQKCFSYLGYKEGDFPVAERVCKEILALPIYPELRDDEVD  
YVCDIASFYK\*

>SPBIB\_v1\_170033|ID:27162738|wbpI| UDP-2,3-diacetamido-2,3-dideoxy-D-glucuronate 2-epimerase [Uncultured  
spirochete bib]

MLEIMTIVGARPOFVKA AVFSRQVRARPYADKIRETIVHTGQHYDENMSDIFFREMEIPE  
PDVNLGIGSGTHGAVTGAMLAGIERLILERKPDLLVYGDNTSTLAGALAASKLHVPVAH  
VEAGLSYMMIMPEEQNRRLADHLATWLFCTNTAVENLAKEGIVHHGLAHPADNKAVL  
QCGDIMYEASRYRPKAMEQIEARLRALPDRFALLTLHRAENTDDPTRISAIVRALNRFD  
SIEFVFPVHPRTRKILAQYGLELKSHIHAIEPVGYFEMLALEDKCSFVVTDSGGVQKEAY  
FFQKPCITLRDATEWRELVEHGWNTLTGADETAILAALASMPKYGDDVTLYGDGTTAARI  
ADALLSWQKVR\*

>SPBIB\_v1\_170034|ID:27162739| conserved protein of unknown function [Uncultured spirochete bib]

MIKKKNSTSKSWIVRNMAEIMKSIAIIGCGRISFKHIEAAIKHADRI SLVAVCDPIIERA  
EQRKTEYQKAFFGAQVAVYADYRQMLEQEKPDI CAIATESGYHPRIAIDCLEAGAHVICE  
KPMALSTQDADAMIASSRRTGKKLAVCFQNRFNAPVQKARRALEAGRFGRL LHGSIQVRW  
NRNESYYAQAPWRGTWELDGGTLMNQCTHGIDLLQWMMGEDAVRVQAVTRRFLRPIEAED  
FGAAIVEFASGAVGIIEGSADIYPANLNETLSLFGERGSVIGGLAVNRIETWRFADAPQ  
VGDTEEA VLNPDEKDPPTVYGFHGSALYADFLDAIEQDHEPLVSGEKGGKALEIILAIYK  
SQKTGRPVELPVDFFTLEMKGTFDA\*

>SPBIB\_v1\_170035|ID:27162740| conserved protein of unknown function [Uncultured spirochete bib]

MITIYIPNNKKECEYIINIFFREIFDIEYCINYEYS DYYEILIDNDRKIYIKDSFFSK  
FLKEKEYLDKKYIPLDIKFAESNLFHTEKLPVIYGEDLIRIGDDNCTIYCDIDIFASAFF  
MLTRWEEYVNKARDQHDFPGIESIAYKYGFLDRPAVNEYAELLWSMLKFLGYNRPRKEH  
QYQMMLTHDVDEPFEIAYKPLGLILKNIAGDVIKRKEYAIAVKKAMD LFEKTENKLSFDN  
FFSFDYIMEQSEKRGLES AFYFLPSGPEMQFRPKIENPTMKNLLKSIHQRGHEIGIHH  
YETYRNEKAFLDDVELLKKALNENRIEYQIKGGRQH YLRWEMPTTYNYQNAGLEYDTTL  
SYADVAGFRGCICYEFTPFDFLKREKLKIKERPLIAMECSIIDER YMNMGYTERALDYFK  
KLKDQCRKYNGNFVLLWHNSRLRNDQEKKFYEQVLDC\*

>SPBIB\_v1\_170036|ID:27162741| protein of unknown function [Uncultured spirochete bib]

LGKNQYELGASLYGNNARFSSKLLXX

>SPBIB\_v1\_180001|ID:27162742| Glycosyl transferase [Uncultured spirochete bib]

MNTNNPALSIIPYNSKEFIEELLSSIPRNKQNEIEV IIVDDKSDNDHVLYLEKLILKY  
NNYLNINLYFNKG VKSAGTCRNIGLDFAKGKWVLFADADDYFKKDFYIIVSRYFQSDYDI  
IFFTPDSFNIRTRKRGIRHISYENLIWEYLKNPNKENTLKLKYFRTP TSKMIKMKVITD  
NKIRFDEVIVCNDDMFSVKLGKTIKKICATKESIYIITEMDNTLSKRRGKNYYLAFLDVN  
IRVYDYLKRNLLENF KILGYDSIAINILIIAYRIYKINIYLLIYTLKRLKENNIPLFKP  
IVQKIKKYFFRALPQ\*

>SPBIB\_v1\_180002|ID:27162743| protein of unknown function [Uncultured spirochete bib]

MSYENLLEILIPTYNRKRYLEKNL KILSNIIRNINAQNEISILISDNSSSDGT KEMLEIF  
KINNSDIKINIYIQKENIGLKNNSL FVLKKAIAKYVMYLGDDDYISEEYLLKIKNIISNT  
NCVTCIVPSNIAIDLQGNIPKRGRDFKKSTKIYKKG YLTASQFMWRGHQLSGIVFKRKD  
TLGNYYKNCEDNIYLFMYFVGFNAIRGDLIHLTEY PVKVTAAPQELKDWNYGKDGLV SER  
FKNSYCLFKNKLIYKFIAEYYLTMNNNRGFLYKILKNDIFS FMIYFSNYLKCKYVSIIGK  
IFFIMLTIYDSCRILNKIIKEVIKRR\*

>SPBIB\_v1\_180003|ID:27162744| putative O-unit flippase [Uncultured spirochete bib]

MREKINLSNINKLFTKDVISTYLNQIWRIISG PLSLILLPMFITPEIQGFWYTFSSISAL  
AVFADLGFTTIILQFSAHEFAFLQFSESLDLLGPEEYKKRLASLFRFVLK WSTSIVIIAF  
PVIFIIGYILFIQKANIFVWLAPWMIYSIGAAIGFYTNVISSFIQGC DQVSNVQKLSLQT  
SIVGTLSMFLSLVLFHGLYSISISLLLANLYNLGEILIKYQKFLKTLWKTEPDKTNWKHD  
ILGLLWKYALSWSSSYLIFKIYTPLMFQFHGPVEAGKVGISISLITSM TSLANVWISANI  
PKINILIAKKDWIQLDRNFKKILILIVVTYIFEIFVLIFIMIFKQNIFFIKIFSRFVSI  
VPMTMLITGWFFQIIISCLAA YLRGHKQEPYVLLSITHGIIIALSTYVSAKYLPVNLYFS  
GFFLSYLIIFPWAIIYIFIKKRKEWHL\*

>SPBIB\_v1\_180004|ID:27162745|rfbE| CDP-paratose 2-epimerase [Uncultured spirochete bib]

MTYLITGGCGFLGSNIAAYYINRGEKVIVFDNLYRFGSEKNLEWLHSLNGYFKYIKGDIR  
NIYEIEPVIKENKPDIIHFHAGQVAMTTSIENPYLDFEINVKGTINVLESVRKYIPETII  
CFSSTNKVYGDLKYIEFEEQDLRYIAKKYTNNGFDETMPLDFHSPYGCCKGAADQYMLDYS  
RIYGLNTIVFRHSSIFGDRQFSTKDQGWVGFQKAYEIKNGILKEPFTISGTGKQVRDI  
LFNSDLIECYNLAIQNIERTRGQVYNIGGGMENSFSILELKFVLENDLNKIMIFKLPWR  
ESDQKVFVADISKAKRDFNWFPKIDKYEGIKRMYKWVEAINQ\*

>SPBIB\_v1\_180005|ID:27162746| NAD-dependent epimerase/dehydratase [Uncultured spirochete bib]  
MDKLLIVGGFGFIGKNLVEYLYEKYNIVIIDKKIDKEFFIKFKKELKFYQYDFITEEMFK  
LHKIIKENPNYIINLISIVTTERNLEIFEEMIKINLNVLLKLFNCSKKLSSLKLFIQFG  
SGEEYGNILPPFKETDRENPNSPYALAKQLTTNSSIMLNKNYDFPIVVVRPGLFGKYQN  
ANKFIPYTISQLLKNEEINITLGEQKRDFIYTLDFSRGIELLMENYKYFIGEIVNLSSGK  
SISLKEIVLFSKEYIKSNSKINFGAISYRENEIKNFLDISKFEKGVKQKFEIDIMQRIK  
EYIDYLGKD\*

>SPBIB\_v1\_180006|ID:27162747|rfbG| CDP-glucose 4,6-dehydratase [Uncultured spirochete bib]  
MIDHDFWKGKRVFLTGHTGFKGSWLSIWLNELGAGVYGYALEPPTDPSLFVAADLENKIH  
SVKGDIRNFENLKKAVLSAQPEIVIHMAAQPLVRLSYEQPLLTYETNIMGTANLLEAMRG  
CASVRSVVIITTDKCYDNKEWLWGYRENDTLGGYDPYSSSKACAELVVGAYRNSFFNPKD  
YGRTHHVAIATARAGNVIGGGDWAKDRLVPDIVKAISEGRKVLIRNPEAIRPWQHVLEPL  
SGYLILAEERLYTKGTEYAEA WNFPGPYDADAKPVRWIVEKLCMSWPDAAAGFEIDIAPKPHE  
ASYLKLDCSKSMNRLGWKPTWNLETSLSKIMDWNLAFLRSEDIYEVSQISDFEADNTN  
NINLKT\*

>SPBIB\_v1\_180007|ID:27162748|rfbF| Glucose-1-phosphate cytidyltransferase [Uncultured spirochete bib]  
MKVVILAGGYGTRISEESDLKPKPMIEIGGKPIWHIMKIYSHYGFNDFIICCGYKGYVI  
KDYFHNLYLHQTDITIDLGNQIEYHDSSEPWVTLVDTGLNTMTGGRIKRIQPFVGD  
PFMLTYGDGVSDIDILALLNFHKQHKRLATLTA VQPSGKFGALGIDSQNAVIQFQEKPKG  
DGAWINGGFFVCEPGIFDYIRSGDETIWERQPLEDL SRDGQLSAYKHENFWQPMDLRDK  
NELERLWATSNAPWKVWE\*

>SPBIB\_v1\_180008|ID:27162749|rfbH| Lipopolysaccharide biosynthesis protein RfbH [Uncultured spirochete bib]  
MAKTEKELRAQIAELVKEYYDIKFAPKPFEPGKSMVRYAGR VFDEKELQSLVDASLDFWL  
TSGRYSEAFESAFCAFTGAEY AFLVNSGSSANLVALASLTSPLLGDRLKRGDEVIAVAA  
GFPTTVNPIIQYGMVPVFDVEIGTYNIDVRQLEKAISP KTKAIFLAHTLGNPNLDAIM  
KLVEKYNLWLIEDCCDALGSTYKGRLAGSFGHIA TCSFYPAHHITMGEGGCVF TSDETLA  
RAARSIRDWGRDCYCAPGESNTCGKRFSATYGTLPKGYD HKYVYSHIGYNLKV TDMQAAI  
GVEQLKLPKFIARKANFKAWTEGFKKFGDAFILPKA TEGSDPSWFAFPVTVSENA GFT  
RTELT DYLNHGVETRNLFAGNLLRQPAYIGIEHRVAPGGLERTDRIMNDTFFLGTYPGL  
KKEHIEYTLGIVEEFLKSKGVA\*

>SPBIB\_v1\_180009|ID:27162750| putative Nitric oxide dioxygenase [Uncultured spirochete bib]  
MSNPVKLKA EVLFIKSFDPDYSVKFKPASNPPRFKAGQFLHLAIDDYDPAGGFWPESRV  
FSIASAPGMPELEIVYSVKGRYTRRMADHLSPGREVWLKLPYGNFNIDTSIAPGQDVVMI  
AGGTGISPFLPYFHGLLANNQKGR TVRLYYGIRENSMLLAELIEHCARAGLIEASL FVE  
NEKPNLHLPSFIRQESGR LDIRQIHAESSNLNNSAFFISGPPAMITAFKDALSQAGISPE  
NIKIDEWE\*

>SPBIB\_v1\_180010|ID:27162751| protein of unknown function [Uncultured spirochete bib]  
VRARLPDIPLRSFTLDEIHELADYTTLYGSLLKDAYAEYLTFGGYPGPVLAPAPLRDLIL  
KELLSTYLHKDVAGYQRVEHIGGFNNMVRLLSAQIGSQLNKSELGSTLRLNAETVNR YLD  
ILEGTFV FSLVPPWFSNPRKEVSKMPKVYVNDPGILLATGARPAIRSPYDLLDGHAVENA  
AFLTLARRFERIRYWR TTGGAEIDFIVETNRGPLPIEVKFS AATSTEPVALRNFRSTYPD  
ARQGIIVSRDAISSKGVPLIPAYVMD FVEV\*

>SPBIB\_v1\_180011|ID:27162752| conserved protein of unknown function [Uncultured spirochete bib]  
MQRTLMMKLLLEWKARPSRMPLLLYGARQV GKTYLLQEFGR TCFQDTIYINFETDSRLASE  
FSGDIDPHRLIGVLELYFN RKINPDSTLIILDEIQACERAL TSLKYFCERAPQYPIVAAG  
SVLGVTVHRNQHSFPVGVKVEMLTLYPMDFE EFLRALGQEALIDVIREAYANHAPLP GALH  
EKALELFKTYLMVGGMPGAVLAYLKDGRMLDALS VQSLILSSYVADMSKYASPAETTRIL  
ACFDSIPAQLAKENRKFQYKVVKKGGSATIFGPSIDWLVAAGVVLKCDRIEHPFIPLAAH

RDLSAFKLYMADTGLLLCKSGVPASIMFSGWDNSTFSGAIAENYVAASLKAKGYPLYWE  
SKGTAEIDFILPRGEEVIPIEVKAGVHTKSRSLGVYRAQYKPDHVIRISHRNFVNGIQ  
AVPMYAVFCM\*

>SPBIB\_v1\_180012|ID:27162753| conserved protein of unknown function [Uncultured spirochete bib]  
MKNRKIGSSILEIADKPGSRILVITGARQTGKTTLARHLFP EYTFLSIEDPVLRSYANL  
TALQWKDLYPHAILDEVQKEPRLIESIKSVYDQWEEPRYVLSGSSQLLLEKVRSLAGR  
CSIIDL YPLTIPELETESWNDPVADSPFQSM LRFPEEIPARIQSLLPDFRLDPNHARIMH  
AWNHYVRFGGYPALTNPDMEDEDRYRWLAN YVRTYLERDVRDLASFRDLEPFVKLQRVIA  
LQTASLVNHS AIGQQVGLSSKTVQRYLRYLEMSYQVVVLPASGNERKRLVKSPKIHMLD  
YGV LQAVVQKRGSP TGLEFESMVVAEL YKQANTILSDARFTYLR TLDGREVDLLIELDAG  
YLA FEIKTTEHASTADIRHLRDLGDILDKPLLHAFVLSNDPTTKTLAPGMTAVHAA YLLG  
SETG\*

>SPBIB\_v1\_180013|ID:27162754| conserved protein of unknown function [Uncultured spirochete bib]  
MRTISFDVPEIDYLQLMEKLG YAYPRDKVTKLLRSGELVRIRKGLYLSTTTPVPYSKEI  
LANLIYGPSYVSLEYALQRHGLIPEAVRIITSVT TGRKKRYSTPVGIFDYVHLPERCFAP  
GMQYESLDRRRSYLIASPAKALFD TFLRYP AVRS AEIESHLFENMRIDEEEF SRIDFSG  
IELLLEQCHRPSIRALRQLVQRRKPHG\*

>SPBIB\_v1\_180014|ID:27162755| protein of unknown function [Uncultured spirochete bib]  
MADTLSVLVEKRHPQSLDEYDSA EVMYRIREGMDGMGVRRDDGIGQDKRDGFWGRFLK\*

>SPBIB\_v1\_180015|ID:27162756| conserved protein of unknown function [Uncultured spirochete bib]  
MMDNEEITRKIIACAFQVHNSLGGGFLESVYRNALLIELSGAGLSVIKEKPISVFYQ NHL  
VGSFYADIIVEDSVVLELKAIEALAKVHEVQLVNYLKATGYDLG LLINFGPLRVDV KRKT  
RVFMPGLDRARRDEQDGTG\*

>SPBIB\_v1\_180016|ID:27162757| conserved protein of unknown function [Uncultured spirochete bib]  
MMKFETLLALFGDQVIFDFTSVL VLCGESRESTRVALHRMKKAGKIIELKRGLY AFAAPY  
RRVPLNAAALANLLYAPSYLSERWALS WYGVPEKTAIYTSVTTRP TRSFENAMGVFQYR  
TIQTTLFGPYRTDTIMGQQVSIAPPEKALFDL WYLEHGEWTQARMEAYRFEPRAVDTAAL  
RALIAASDLPR LARAMRVWEDYAREAAQGVII\*

>SPBIB\_v1\_180017|ID:27162758| conserved protein of unknown function [Uncultured spirochete bib]  
MKNDALGLVHSIADPTDRLNVLREYIQALILRSLHESQAFTSIAFFGDTALRFLFNLPRF  
SEDLDFSLELEKEYRPV VWMQKIKRDLQFQGYEVSISW NDRSAVHVAVWVGIPHLLKEAGL  
SGHSEEKLSVKLEFD TNPPKGAVCASTLINRHTLFAVRHYDLPSLMAGKVNALL TRSFCK  
GRDWYDLVWYRSRPPVEPNLELLRNAL AQQGVHLDGDWRTLVRDRIKHTEFEVITKDVA  
PFLESHEDAKLLRPEYITALLEEGLG\*

>SPBIB\_v1\_180018|ID:27162759| conserved protein of unknown function [Uncultured spirochete bib]  
MIKDMILRQKYEKEKIVKGN YVERKERSTAKKWLESDLIKVITGPRRAGKSVFAFM LLKE  
SPFMYFNFDDESIRLRNEFN TDELIKSLHEVYGQSKIVL FDEIQNL PQWELFVNRLQRQG  
YNLIITGSNSKLLSKELSTALTGRHIPIEILPFNFREFLSAKHFD FKEEFLQIPQKKGEL  
LRLAEEYLLTGGFPEIVTKDLELKEYLRTL FDSIILKDVVQR YRVKYTSEISDIGTFLVN  
NFASLLSFRKIQNALSRSITTTK KYINYLEESYIFFELS QFSTKAIERMKS PRKMYIVD  
NGYITAKSVRTSFD RGKLENLVFIELVKQKKEPN SDFYKTRNGREVD FVIRENLHIS  
ELIQVSYDTSNIETTQREIKSLIEAREELNAQELEVITWDEEKEIEKNGKTITFKPILKW  
LLHS\*

>SPBIB\_v1\_180019|ID:27162760| AAA ATPase [Uncultured spirochete bib]  
MKRYALEMLRKWKNEPNRKPL VIRGARQVGKTELVRIFAKEEFDTLIEINFDEHPGKASL  
FADEDILSVIRYIEIDSNMKISPGT TLLFLDEIQAAPS VLSRLRYFYERIPQLHVICAGS  
LLDFALSEPTFSMPVGRIEFL YLGPMTFGEFLLARGQGELEDYLESYSLTRTIPEAIHAK  
LRSSLRDYFLTGGLPGVVKASVQSNCDLEDVAREQHSILQTY YADFGKYKQKVNVPFLQG  
IFRNIPAQVGKTVKYTSLNSQARAAQVKENLELLEKARLIYRVFHSDGNGIPLGAEINPS  
YFKLIFLDTGLLSAFLGLRLTDFLPNAEYTLIHS GAVAEQFVGQHLLYSAEPWAEP SLYY  
WNRQSPGSTAEVDYLMQCRGQVPIEVKAGSRGRLRSLHMFVQEKQVPLAVRFNTDLPSI  
HSTHTAIAGKEARPFVLLSLPLYLVEQTQRLVEGMGDWTGLQDGTG\*

>SPBIB\_v1\_180020|ID:27162761| protein of unknown function [Uncultured spirochete bib]  
MEFGLFASIRWTQRIRDSLLVIRLLSTIDEFHYSQGLGMLEDGMYIFDADKTVQDEF RV

ELDVPVENEYTFG\*

>SPBIB\_v1\_180021|ID:27162762| putative DNA polymerase subunit beta [Uncultured spirochete bib]  
MNSSAVRSKEETIARLREYCGAQDDILLILHGSAAHQDLRAESDIDIALALRHPISIDE  
KLDYILIFSICGREIDLSDLRTIGGLFLHQVLSKGILILNRDIELYTKLVLSLICIED  
IHPILQHAQTL\*

>SPBIB\_v1\_180022|ID:27162763| protein of unknown function [Uncultured spirochete bib]  
VVYATTTMSTSKKRYEVFENFAKEMGATFSTNLSLSEGERSLLEEFARHIHEINTVDDP  
LFTPGERFRLADTYNLSVDEGDIELFTVELSRLFDKTTLTKKTLASDTAMRDQATERA  
LNRVLTGIQYTGISEPHQRELRESGAEASDILDAFKPSILKNHTVNILREDLMDIYERF  
LLWMRMTRDGMALSTRDRHRVEALLKKMIDLLNLAYVLNEPTPSSDPLVQRLIASSDAR  
MEQTVVYTSALKELESIMPSRQKSDDNWDWLDI\*

>SPBIB\_v1\_180023|ID:27162764| protein of unknown function [Uncultured spirochete bib]  
MQTQYRVFLNQRVTARVAQMOPAERRRFAEKIRFLALGIWEGGVLVKKLSGTTRKVLFEA  
RLTKGDRLLFTLGKIDDQSAVYLWALVKHDDVTRAARAGFPDNAPFLDFPIDTEETIEEL  
YLDTAPEQWHTQEGIEEKVVADYGPQKWNVLDDDEWERLLAAHTLSELDFHLYLSNAQYA  
ILARDPPLL VSGTAGSGKTTIALYYLSRKEFLGASRLFVTYSPYLRDEASKLYRGLVKGN  
PLEDRPPFPDFLTIEELQRQNIDPHSPLQNPATFVGLNEFTSLIAAHPLAKNYDPELLWE  
EIRAILKGAMPYSLKRLETLARELGSGSICLSHRQELAAELARYRQLSFGGRDAICAA  
SSAFSTMEDFSNALGMRPQEGEFQVVSRLVLEFLKKKKEFLTRPLLSLEEYEFGLGKKRAPN  
FIYDRKELYALATYYEKKREEQGLYDEIDLAKRALIERKRMQDPRVWDLVICDEIQDMTD  
VHLELLFDLCKNRDHVLFAGDERQTINPSGFRWEAVRARFFESGARVPEISRLSLNFRST  
GAIVELGNALLDLKKTFFVAGKFEARES WKFTGKPPVIEGIEEARILHIVRQSGTNRSI  
LVRSPEEKRRLIAQLGTEL VFTIQEAKGLEFDTVLLWKFIEDETSNALWSTMTHGATHGA  
PEALLPHLSHELNLLYTAIMRARSILTIYDGLKPSAVWGAGRLSSLVITNDTSLLEESW  
SKASSPEEWNRRQGMFFARGYYAAAECYRNAAHREKEKEARGWAA YQAHDYLHAAPLFE  
QSGDIARAAWCFEQSGELATAMALYTQLGDKTSHTRLSILALEREGRYAEAGRVLKMG  
VDHALEDWRRGGEYELLADYYKKKKDYHHC AHFYEKAGNYEKA VFYKKNHEEAHAFELI  
LARATGPGADPAAVEFLRKEADRCMATRRFAQAATLYVSLNAHQEAAEAYRMAGAHHERAA  
LEFSRAKMYHEAAHEYS LVPNIERALAEWKA YVPETHDQRLAKLQGIDTLQWKL IARNPS  
PEKAYNQAMANALFDEALQTLERGEYLNALALFIFKEQKQMLECLRHHDDMLALYTV  
RVAHFTLWSQYRAHKARVVDARKAIGYLSKIYMSELTGHAHALEMARGLVLLLEDILDA  
ADRSMLPQLKNEMLFSLSMLADFCRSSVENLVNAGKDLLRLLARLRDYSRISTAGLDWMS  
RFKETPAMRSVVGYLDELALSNDPLLTVCSSLVRKASFDPEILATQAVDESNEWQFLSAI  
PETKDKVVAYLLAQHRIQDAAATLRFNRAHLEAAELLESNGYFKDAAQIYEYLNWEHAF  
AIYTRIGDQHRIARMYEHKGDYLA AIELWKQLGFPTQVQRLTRKYQKTIANSHQTHLDFG  
D\*

>SPBIB\_v1\_180024|ID:27162765| conserved exported protein of unknown function [Uncultured spirochete bib]  
MMKKIILALGIASLCIACTVNPKD ATITEKFVISDPCVKLTDQLASIIHAEDLQGANDAET  
AQNILNWQHEYMKYADPGTQEDASYAMRWNYFLPGIFPVSEMI SERTMQEDGKTKIYGVC  
WDFAAVFISVAKSYQLTTRMTAWKEYMPGVTGGQNGMGPT EYNALPKPLLAHGVDFDFTQDQ  
INAAAHETWKHYRAEVFIDGTWKAYDGTDPDGTGDYVNDANYTLVSWDEGAKAALT TKE\*

>SPBIB\_v1\_180025|ID:27162766| conserved protein of unknown function [Uncultured spirochete bib]  
MLFSCIMERKSILDLQIWQKKS DRKPLILHGARQVGKTWLLKEFGKRCYKNVAYINFEEN  
ERMAALFASNLDVGRLLTGLRIEAGCPIEPASTLLIFDEVQANPRAL TSLKYFAENAPEY  
HIAAAGSLLGIAMHAGTSFPVGKVEFLDLYPLSFEEFLWALGEQELAEMLGGRDWQFIEA  
FREKLIDYLYKYVVGGMPECVSTFVATGDLNKARELQERLLNAYEQDFSKYADPAMVPR  
IRAVWNSIPSQ LAREQRKFMVGLVREGARARDYELAIQWFC DAGLLHKVYRVSKPGIPLR  
AYQEDNAFKLFMVD TGLLAAHAHIPISTMLRGSDFE EAKGALTEQYVAQELRLRNDIDV  
FYWSSDTSRAKVD FLIQC GESLYPLEVKAAENLQAKSLR VYRDKFAPPRCYRTSLSPYRE  
ESWLNIPLYALAGLRF CQ\*

>SPBIB\_v1\_180026|ID:27162767| protein of unknown function [Uncultured spirochete bib]  
LFSTRHIMKSTRAELQSAKVAQGESGCTVQISWMLGAQSAREAAWPYILECAARQPAC P  
TGPTCLTCLQLPAHR SFEGGEVVAADGDGEAAQVGLAGAEVKEGGEVLFWRQGGFGGGS  
PAQFADAARLMQSHPTGVAPPLRSSRTRRMASRRSFM TGFKI\*



>SPBIB\_v1\_180027|ID:27162768| protein of unknown function [Uncultured spirochete bib]  
VRLHQAGCVRELRRGGAPKAALPPEKDLASLLDFFRARQSYLSRLTIPISRDYLA AFKTA  
MGWEL\*

>SPBIB\_v1\_180028|ID:27162769| protein of unknown function [Uncultured spirochete bib]  
MNGIETAAQLPPGTAIIFITA YDRYAIKAFELHAFDYILKPVMKDRLEEAI RRVRELRRG  
GATPVGCD CIRRAASANCAGEGPPKPPCRQKRTSPPSLTSSAPASPT\*

>SPBIB\_v1\_180029|ID:27162770| protein of unknown function [Uncultured spirochete bib]  
VGTGKRTGPLLDHIVPA VRVLA FNAAAATNKA EFKKLNPGVKVYIINPGGTEAMIKKL  
EAEKGS PQADIMHSGDSSNYLYAKKQGLLLPSKHIFRRASLPAQKGFHAISPQGSRLGTA  
LNTIIPSFSSNPTSSSSMSKCPK\*

>SPBIB\_v1\_180030|ID:27162771| protein of unknown function [Uncultured spirochete bib]  
MGNKTAGIGRWRIAVMGTLLQLCLGTVYAWSYFQKPIMERFGWSNSQTAWTFSIAIGALG  
LAAAWSGMNLAKYGPRGALEKLWARKVQRDRARADGVRLTRVWRLPARAQSRRC SVPGKF  
GARFSPRDSCLCGSCFSSTSRRASCSSAFSHP\*

>SPBIB\_v1\_180031|ID:27162772| membrane protein of unknown function [Uncultured spirochete bib]  
MELFPEAHNGAIRLVQQSDGVDVQHRDRGAWARRSLERDEPCKIRPARGLGKALGSEGSA  
GQSAGGRGAANQGVAPAGQSAEPALLSSREIRGAIFSARFVLMWL VFFLNITAGIMFIGF  
QSPMIQDMVHAQDPGKSAELAGVGATLIAISSMFMNGFGRLFWGGLSDRIGRTRVFRIL  
GSQVLVFVELLFVRSPMVFGMLVCYVLLCYGGGFGAMP SYIAIVFGPRMMAV VYGAMLTA  
WSAGGIVGSQIVAFIKDRWPGGAVAASAAQAGAKVAQVAGGAAAGVNTGAAAAGAGPGVR  
VAAGAANVAAAGPAAMTAASWIFLIGAALLALGFGLSFLSDGENLRKGV\*

>SPBIB\_v1\_180032|ID:27162773| conserved protein of unknown function [Uncultured spirochete bib]  
MSIEKEYDARIDKKKRLTIRGARYSNYHVCEYENGTVVLEPRELVPPFEVSKHTLEMMS  
AMMNFKN GKASAPVDLSAFSEK\*

>SPBIB\_v1\_180033|ID:27162774| conserved protein of unknown function [Uncultured spirochete bib]  
MFSIRLGVPEMEALWAE LSSKAKMGT LGKNEAKLYIKMGKAMGLLSNNPKHPALHSHEIE  
ALSRRYGQKVWQSYLENK KSGAGRM YWVYGPEQNEITIIGLEPHPEDKKSSGYEKIRLSA  
TGQKEA\*

>SPBIB\_v1\_180034|ID:27162775| conserved protein of unknown function [Uncultured spirochete bib]  
MKNRKSALSIMARKDKPGSRIIVLTGARQTGKTTLARHLFP EYQFLSIEDPVL RNAYASL  
TASQWKELYPKAILDEVQKEPRLIESIKSVYDQWEEPRYVLSGSSQLLLEKIKESLAGR  
CTIIDLYPLTIPELETESWDDTIADSPFQIMLSHPGDISRQLESMLPDFRLDANYAKKMK  
AWNHYVRFGGYPALTSQLNDEDRFEWLKQYVRTYLERDVRDLAMFRDLEPFV KLQRYIA  
LQTATILNYS AVGHNIGITTKTVQRYVQYLELSYQVLILPSWSRTEGKRLVKSPKIHFLD  
YGV LQAVVQKRGSP TGLEFESM VIAELYKQAKNILSDARFWYLRTFDGKEVDLLVELSQG  
YLA FEIKTSEKVS IADARHLRDLSDVLDKPLLHSFVLSNDTATKNLAPDITAIHPAYMLG  
\*

>SPBIB\_v1\_180035|ID:27162776| Toxin-antitoxin system, toxin component, RelE family [Uncultured spirochete bib]  
MAYIVRISKQADKTI AKAPKAVQ QKFALLDDLEKYGPIRKDWPNFSALGNGLYHCHLSY  
SWVAVWRNEKASVLVEVEYAGSRESAPY\*

>SPBIB\_v1\_180036|ID:27162777| protein of unknown function [Uncultured spirochete bib]  
MRVVEKAHHIEDSKLIAVSAEEAGKILEYAKQIDPHAHFVEETPLSDGFISP HESGWYQ  
DVKRSWHPGITLRIRRENAGLTQAQLSRMTGLAVANISAIENGRSMGLNVAKKLATALK  
RPVSEFIEKS\*

>SPBIB\_v1\_180037|ID:27162778| conserved protein of unknown function [Uncultured spirochete bib]  
MSGYEK FYEESLYPLQNGILRTLAPVCGNVL SLTGGTALSRIYFHHRYSDDLDFGNSVE  
HFNEIVEASLSALENAGYQFVKGSIIRHEA YTVAVVRNGGTNLKLDVNDVAAHFGECIA  
HPLYPRIDSVRNILSNKLTALYRLEPKDIADLYFIACSYQFDWAVALQEAESKEAGLDAI  
TIADIISTFPRDMFKA IKWITPDPGDFFKSLTIMTRDILHASPNSLAM\*

>SPBIB\_v1\_180038|ID:27162779| protein of unknown function [Uncultured spirochete bib]  
MFTREKLELLAGIVWDYDTPETLLAVLEGRQEKAGGV DKS AIYRLLRALPWQNI VGL  
IGADEAIAMLT TENIAHLWPRELKEHYERLRKILRGEPVSPSEWDS PNACARLRQRTFSH  
RWYRAQ\*

>SPBIB\_v1\_180039|ID:27162780| protein of unknown function [Uncultured spirochete bib]

MSQSSNSPKAPTSKPPAHVPEGASFLVRLDPLECAKKVLIPSHRFEPFHSYRISIPRLEI  
RLPDASPLPKKNIVLPYNEILRFHNLLNFMDFYMLEEMYPGNFPADLAQASQAFDRLIR  
LSVFDLEPLFPGGIQGSYVRLSVQRYQKGIFTAAPVTPEEASRLDREAWFSTMDAAFAR  
AFDELKFPRRNDTLLSLVYRYGGEALYGNPAAALIDYLDKRAAEIIFGGENLIWKKGV  
DPEHIVLSGLDAYGTGSRKPGKASPAARTTSTPTSAPARAENSAAPAKTSNSASAAPPK  
TAPAQTNGAPSEARPIAPVRAPAKPRKGRKPSLKARLNRFEEAYEFANADEIKALMLD  
MAYRGTTLQDLWDRFFESSPQWTVFPEAADELIDLIEDYCDALANYDPERDGFGEEMRAA  
LVDIYANYIAWMRRLDTKLRSPEDLPIEKFTELANLISSLNEFMLIMNSPAKRGPGDPSE  
REVLEQFFDSVDYMRQAVTDLEHEIETIALRKKKGV\*

>SPBIB\_v1\_180040|ID:27162781| conserved protein of unknown function [Uncultured spirochete bib]  
MSSVTANVLMIGDIVGAPGLRALFTFLPSLIKKTEADLVIANGENALKGFGIGEEIEAAM  
RSYGVVDVITSGNHVWERKEAADLLEAEPALLRPANYPRSLPGRGVAHIEGQSAPGLPAPT  
RASGASGHFEWLVVNLQGRREL YDIDCPFAKADQILANAARENPGALIVVDFHAESNEEK  
EALAWYLDGRASVVAGTHTHVPTADERTLPKGTGYLTDLGMTGPVDSVIGMNGDICVRRF  
LTQIPYKMETAECSAAMGALFRIDPESRRRCVGIERYVYKSL\*

>SPBIB\_v1\_180041|ID:27162782| rny| Ribonuclease Y [Uncultured spirochete bib]  
MAPFVWYIVLPLAGLILGWMIRWLYARFQLSSAEREAEHVLQDAIKEAEAKKKELLVEAK  
DQIIRERNQQERELDRRIELQKYERRVLLKEENLDAKLASIERIEANLKSRENAIAEKE  
AFLAGQEERYAAELERVSGFTAEEAKKLIQNMENEARHDAQVLINKIDQEAQLTADKKA  
KDILLTTIQRATESTAESTVSSVSLPSDEMKGRIIGREGRNIRTLETLTGVDDIIDDTP  
EAVVISCFDPIQREIAKISLERLIADGRIHPARIEEMVQKVTREITQKLYDEGEKVVFDL  
GLHNMAPELIRAVGRLYYRTSYGQNVLMHSKEVAVIAGLLAAELGLNREIAKRGALLHDI  
GKGIVTDSMDMNAEIGTEIAKKFGEDPRVINAIAAHNDVEPTCPESVIVQIADAISAAR  
PGARRETLDNYIKRLEDLEAVAESFSGVEKAFAIQAGRELRIIVNNEQISDDQAKDLCKS  
IAKKIESDLRYPGRIKVTIIRETRIVEYAR\*

>SPBIB\_v1\_180042|ID:27162783|rbpE| putative RNA-binding protein RbpE [Uncultured spirochete bib]  
MAKKIYVGNMNYNTSERQLQDLFAQYGEVSTVNIIVDRFTGKAKGFGFVEMENAEAADAA  
IAALNGQEFMGRQLRVNEAQEKPRYEKEDAGYRSRRY\*

>SPBIB\_v1\_180043|ID:27162784| conserved protein of unknown function [Uncultured spirochete bib]  
MSMEHLIEQFRHKVARTPMHFVRSIHDSIQWNARLIGIRGARGVGKTTLLQHIKQTFQAQ  
DLNKVLYVSLDNLWFSHLSLELADSFACKGGTHLFLDEVHRYPSWSQILKNLYDDYPEL  
FITFTGSSLLHLLDAKADLSRRAVVYTMQGLSFREYLALANMAFPAPFSLEKILSEHEAV  
SAEIVSQFKPFQFFPAYLQTGYYPYFAEEPDTYPLRLEETINMTLELELPLLRRLDIAYI  
PKLKQLLSIIAESAPFIPNISKLSEKIGLNRQTMLTYLGYLSEAKLIRPLYRDAHGVSA  
QKPNKLFLENTNLMYLFKQSVDIGNARETFLANQLACGHELFSFADTGDFIVDGSITIEV  
SGKNKTRKQIKDIPDSYVAADNIEYGFGRKIPLWLFGLY\*

>SPBIB\_v1\_180044|ID:27162785| protein of unknown function [Uncultured spirochete bib]  
MVKKVKKRGQTPFLKSDGHQLSVWEGTASLSEPV RADKYLSETLALMSRSQLKARGACLF  
CNGKEVKLSHKIKNGDHLRLEWTEAPSEEITPEPVPLTILYRDADVVIDKPOGMVTHPA  
AGNWSGTLANGILWLSLHGEDARATGLQTENEA EAKNELELNRESRAISESKSEPEPEPN  
STSKREPENEPIPFYTSFRTLPLSPPRAGIVHRLDKDTSVVIIVARTARAHEFLCRQFH  
DREARKEYLAIVRGAPPTTEGRIDTWLARS PRDRKKFAVSPSGRGKHALTLYKVRAIWEI  
PARAESATRAALSRPNTASRAAASCAESA VPTATPPGRPITASRAAASTRPGTACASEA  
PQSLSRSPSKKATSPQRYTLVALYPRTGRTHQLRVHMAHLGCPILGDPIYSKKDTLFPD  
ATLMLHARRLKIRLPADNEFHIFAAPLPEHFHMIAMMLDAQGIRRRAST\*

>SPBIB\_v1\_180045|ID:27162786| protein of unknown function [Uncultured spirochete bib]  
MLEVLGKGRGKDVFEVIGGQADFKAPGVEHEGGIGKESVFFAVDWVAKNGAAEVGHVDAQ  
LMGAACAGIEGDEGVALGRSGLLGAAPRKALGRFGGAGGPGAGAGCGGAGSGDGAARRR  
GGWDRRFGTGRGSAGSGIGAR\*

>SPBIB\_v1\_180046|ID:27162787|truA| tRNA pseudouridine synthase A [Uncultured spirochete bib]  
MQQNPDFQQPPVKASARPD SMPSRAS TLRTIKLVLAYDGTDFSGWQRQKNGRSVQEELE  
KALSKMHGHEIRVNGAGRTDAGVHAMGQVASFYTDIQSIPADRFTLALNKLMPRDVRLS  
SEEAPADFHARFDASLRRYRYFLVCGGTPDPFALRCAHFVPYPRVAVLNAMA AVVLGEH  
DFSTFASAQDKSPSRSRHISES VFFFEGEKLVYQIAGNAFLWKQVRSLVGTMLELERIAE

SPAHGESLMRELLDSRDRSKAGATAPACGLFLWNVEYGQRVHGHPRRHSEEAYG\*

>SPBIB\_v1\_180047|ID:27162788|acpS| Holo-[acyl-carrier-protein] synthase [Uncultured spirochete bib]  
MISGIGIDIVHIDRIRRWENPGILVRFHFAEIETARSRSKGMALSLAARFAAKEAFGK  
ALGSLAHFALKEVAVVNDSAGRPYMELEGNARREFERHGGGTIHMSTHEGDNAAVAVVI  
IEKGN\*

>SPBIB\_v1\_180048|ID:27162789| putative YbbR family protein [Uncultured spirochete bib]  
MSLDARISKLEENWPAKVISLVIAIFIMFLYNLTRLDQRLITVQLNISEGRSFPSTDYP  
KTVRVVIRGERDQIYRIREADIVASLDLTRYQSEGVFRVPVKLERRGEARDIDPLELRAD  
PAEPIGFERLAAKRVAISPTFKGFLEQGYELISYEIVPSEIAIEGPSNLIANTKDISTD  
VIELSGKTGDFSLTVPLSKPSDLINLIDVNTVRFRTARIQKQERRITLNNVPIKAVNLDDPA  
LGFAETMPTGKMTLLPRQGQDAAAADAHLQADFKGITKPGQYTVPLTPVVPDGYDVEAY  
DPLVISVHVRTAQSVQSVLPGLLAPSGSSGLPAFPAPAAPSTQP\*

>SPBIB\_v1\_180049|ID:27162790| conserved membrane protein of unknown function [Uncultured spirochete bib]  
MNAPALVNFLVTVYVRPVLDAVAILAFLIYKTYQLVMTEAVYLIRGLLILVAIYGAAFFLN  
LSTVTWIMNILAPGLVVSLAILQPELRRIFIQLGRQSIKQKAAARTSWIDAAVSAAVY  
LAEKRRGALIVIARKVGLSSYIEKGIALDALVSTSLIAVFEHDNPLHDGAAIISQGRLA  
SAGCFLPLSDQQDIRKTFGSRHRAALGISEESDAVVLIASEETGALSLEYDSKLYYDLSA  
DEILERLRMLFSESRSRSMTSEADYEP\*

>SPBIB\_v1\_180050|ID:27162791|folP| Dihydropteroate synthase [Uncultured spirochete bib]  
MSDSPASAHQCNEQTELTRITLKLPRQRSLLYGAQPLIMGIVNVTPDSFFEGSRKYEPQA  
AVEAALAMVSHGAHIIDFGAESTRPGSIEIDPKEERARLLPVIERFRAASDAVISVDTRH  
PEVARAALEAGADILNDIEALAAPGMAEIAAKHHAAVVLMHMQGTPATMQIAPAYADCLE  
EVYTFLRAVTKGAIAGVSAESIILDPGIGFGKLEHNLALLRGIGRLRSLGFPVLIGLS  
RKRLVGELTGREIPERLAGSIGGALAAWMAGADIIRVHDVAETVDAFRVFTAIFPARPSG  
KEFSREVS\*

>SPBIB\_v1\_180051|ID:27162792|dxs| 1-deoxy-D-xylulose-5-phosphate synthase [Uncultured spirochete bib]  
MVQYIDMALLDHISGPADLKELSLAELRRLADEIRSRIVETVQLNGGHLASNLGVVELTI  
ALHRVFHSPQDAIVWDVGHQCYPHKILTGRAERFHTLRRQGGISGFPKREESEHDIFDTG  
HSSTAISSALGLLAARTQTGKQGRVIAVVGDGVLTSGMAMEGLSNAGQLGLPLILVLNDN  
RMSISRSVGSISRYLSKLSASMRYSQSFRAHIDAAVLKIPRIGKPLSEFINRSKRAVKAIF  
FKENLFVDYGFYVGPIDGHSITAMIDAFHVRLNLRPVVVHVITKKGKGLERAEEDPES  
FHGLGPSCPDIPGAGESHGESFSSCFANSLIELAEHDARVMAITAAMASGTGVAKMLER  
WPQRFVDVGIAEQHAVTFAAGLAQGGLRPVVAIYSTFMQRAVDQVFQDVSANVPVLFAL  
DRAGAVGEDGETHQGIYDIALFKAMPNLIFFAPADGDELAAFMKLSLSLDAPCMMRYPKA  
FSPCANGAMRPLEVGKGTMMRERAGARILVCAVGPLAYSAADASDALEKKAVLADVYNVR  
FLSHIDEEYLASLCARYDAILTAEDGVRVGGFGETLAAILARRGVRAGIRSLGFENTPLA  
QASRDALLAQAGLNTKGIQKALEELQRSLGPESKKNAYAASVAAATARATPIPVGVEVQ  
HVR\*

>SPBIB\_v1\_180052|ID:27162793| protein of unknown function [Uncultured spirochete bib]  
MHMLIDIKILHLHRPIYYEKIELVSDEIQNNAISALAAARYGECLLVFRNDNLLILSDDGP  
HLASKLVPSTAYRIAVRDGGKGSTDTASAIPDESQGNIVGRSAPRQLSADYSIARFTLSA  
ADYAFFQWRAESAPQPSIMFEEFAREIWWERLETEGAWFLRLVLEDGKTSVQALRLVLST  
LCKRGH\*

>SPBIB\_v1\_180053|ID:27162794| protein of unknown function [Uncultured spirochete bib]  
LGRYSAFSFPVGRHSFFQLLAMVGLKGLRVRNARSSKLLYXX

>SPBIB\_v1\_190001|ID:27162795|alaS| Alanine--tRNA ligase [Uncultured spirochete bib]  
MITIHELRRKYIEFFKARGHSEISGKSLIPENDPTVLFTTAGMHPLVPYLLGEPHPAGKR  
LTDYQKCI RTGDIDAVGDPSHLTFEMLGNWSLGDYFKKEAIRWSYEFLTSPEYLGIDPA  
KLSVTVFTGDEGVPRDEESASIWRSLGIPEERIYFLPREDNWWGPAGETGPCGPDTEMFV  
DTGKPACGPDCRPGCHCGKYFEIWNDFVMQYNKKNKNDGSYEPLAHCVDVTGMGIERTVAML  
QGKKSVEYETEAFTPIAVLESITGKRYGALDNNPETDRSFRIIADHIRAATFILGDPKAV  
LPSNIGAGYVLRRLIRRAVRHGRKLGIDGIFLAKPAEAVIEIYKEPYPELLENRARILEE  
LEREERKFLETQKGEHEFEKMLPNLLRNPEKIMPGRALFRLYDITYGFPIELTEELASEN  
GLAVDRAGFDEAFKKHQELSRAGSEQVFKGGLADHSEVVTRYHTATHLLHKALRIVLGEH

VAQKGSNLTAERLRFDFSHAPMTQEQAIEVERIVNEQIARDLPVSMTMMPLEEKASGA  
IALFGEKEYEPVVKVYTIGDFSKEVCGGPHVTHTGELGKFKITKEQSSSAGVRRYIAILE\*  
>SPBIB\_v1\_190002|ID:27162796| protein of unknown function [Uncultured spirochete bib]  
LKCIFITQVRSRAEKAHARLLIDSIRAFGGPMRDCEIWFATK PANEP CDDLEGLQVKVI  
PLSVQRKFM DYPF GDKVFTCATAEAMAASDTGSLIWL DPECLVVQPPLFDLGGEEFAAAL  
RPVHVHNVGLLVSEPLDPFWKGIFRTVGIEDIEFAVESFVDRQAIRAYFN SHGLAVRPGN  
GLFRKWLKSFERLVSDREFQLEACCDNFRRLFLFQAVFSAVVVSDVEREKIRILPETYNY  
PYNLHEQIPAAWRAAALDDL VCLTYEGRTLAPCRVTDIEIHEPLRSWLETRKGGQAFETAH  
\*

>SPBIB\_v1\_190003|ID:27162797| conserved protein of unknown function [Uncultured spirochete bib]  
MRVVFVSGGFGNVGISTVRALLSAGHEVCVFEHPSAKEKRSARLRELLKASGSKLKVVFFGD  
ITDEAALSEAMACFGIDGSSEGLDAVIHLAGIIPPLADRDPELAYRINVGGTRALLAVCS  
ILPRPPRFV FASSIALYGDRLASPWIAATDPLLNDTYSKTKQECEALIKSAGLDWVILR  
LSYVVSSDWLPFD PMLFEVPPATRF EVLHTEDAGRAFAAACQNPDAAGRIFNIGGGAACR  
TTYRAYLDRLMRLFGLGSSSFLPDELFAKCNFHCGWFVDSDEAEAVLHFRSKTLEDYYSE  
VQWRTRFLRPLASIAAFVVKPWMRSLSPYRVS PGRVRS PQLV\*

>SPBIB\_v1\_190004|ID:27162798| protein of unknown function [Uncultured spirochete bib]  
MPRPKTEEKRLILD TAKRLF ALEGVGVSMNEMAE AIGIPV GSIYTYFDSKQVLVETIIE  
EGWNEYRLWLEEGIAAIQLGNQ NADARLIALKILSFLVNKALPKLFS DVELIMLLLAEAG  
TTARLEEKLYFSSMITKL VSECQVSGAAENDPRQYNTGITVLLLGALET LRLSSKTDLK  
LGADDIQAFFRLIVENALGQGLPDTD\*

>SPBIB\_v1\_190005|ID:27162799| Asparaginase/glutaminase [Uncultured spirochete bib]  
MLEYLCAAWYYTVIMNPEAIRIIVTGGTFDKHYDEIKGELTFTETHVPEVLKRARVSPV  
QVELNQLIDSLYMQEANRQSVLDACKRAPERHIIITHGTDMAETA KLIGSARLDKTIVL  
TGAMIPYKILDS DALFNFGTAFAAVQLLPAGVYISMNGRIFD WNRVRKNKTLGVFEEIQE  
\*

>SPBIB\_v1\_190006|ID:27162800| protein of unknown function [Uncultured spirochete bib]  
MLEFLFFVLAKILESNNVTEDEIRKNEAIQKEAAITSLAAFFLVKNTDFFSDCTLKILPK  
KPKYSQ\*

>SPBIB\_v1\_190007|ID:27162801| exported protein of unknown function [Uncultured spirochete bib]  
VQSEKKS VFLTRKKAARLVIAASFCIASFFLISSVTLFDSSIFASTKNKNSSIMFAVTL  
KNNGSYSDPVSRLYINDKTKNQVLKFFSAITNSMPVAKAILDNSIAHNVRPSLAFAYV  
ESRYNPKARSVNTSGSLNSGLFQLNSSVFDKISEKQVFDPHYHNARIGISHLKEYLILSED  
EFTALAAYNAGITRIAEQGIPGVTFKYISEVSIMERKIMDLFVASMALSGNPL\*

>SPBIB\_v1\_190008|ID:27162802| Transcriptional regulator, TetR family [Uncultured spirochete bib]  
MMYEK WGIWYNNISTEGVILSGQVAHEKRRQEILEKALDVFIEEGYEDTT FQKIAERCGI  
TRTILYLYFENKKQIFAESLKRFLGSVEIEIAVVAHDESMNSEEKILKIGEMVVEACEKE  
SKLLSVVLDYLLRLKAAGGNPDEK VRRRTVRMRHILADIVIEGKKRGEFSETSSVKGTV E  
IFFALVEATVFRLVVLGRKEATGLAEALTPFVQSMRP\*

>SPBIB\_v1\_190009|ID:27162803| Alpha amylase catalytic region [Uncultured spirochete bib]  
MALQISRSLRSVNVPPKHLWMPSGAIAPDSVSARVVAQKFQLPASELRALS LIDDASRI  
IIDLYRQQLSKMLRHITESAMGTEKDRSALADVLKELALEFPPEVFDGIADASDWLESS  
SQA KDGKMLSHREAALEQLILVRLFNENPACVSYRPLFDDGVSPAGTAAAGSLAAKTPYL  
AVFLKLEEALKALPGLSYEK GKALDLISFLREPAKRAPQSLKAQLQWIVDNWGELLGDFR  
LALLAGIDMINEETAPRFPAGGPAHAYHYRSSLHEYEKFSADR NWMPSLVLLAKNTLVW  
LHQLSVIYGREISRLDQIPDEELITMAERINGLW LIGIWQRSPASEKIKKLCGNPEAAA  
SAYS LFDYEISPELGGWEALDAFREQCRQFGIRLAADMVPNHTGIDSFVVRTKPELFMSV  
PYCPFPSYTFNGPDLSSDPSVGIWLEDHYYSRTDAAV VFKRLDRHTGEVRYIYHGNDGTG  
MPWNTAQIDFLNPAAREAVKERILHVASHFSIIRFDAAMVLAKQHIRRLWYPAPGAGGA  
IPSRSEHAMSD EAFDKAIPNEFWREVVDLCAEKAPDTLLLAEAFWLMEGYFVRTLGMHRV  
YNSAFMNMLKEEKNSLYRLTIKNTQEFDRDILKRFVNFMSNPDEETA VAQFGKGDYFGV  
ATMLATMPGLPMIAHGQIEGFTEKYGMFKRSYKDETPDRDFIARHEREIFLLRTRPLF  
SDIEHFFLYDYMRADGTIDENVFAYTNGQGEQRALILYNNCWERTSGRIHNSCAFTQKSP  
SGKKHLETITLAKALGVEPSPDNYLIMHEIRSGLWFIYRSEEIASSGLQVALEGYQSKVF

LEISSVHDTEGRYARLYEIVDSKGIADLDDALLEADQPDLFRALHNAIVSLNGVEAVESL  
SKSEAIARA AIFSEMFFSRLCATAGCEYTHPASRAESIRRAVSWMSSVLSGLYNPEILDE  
APLAAYRIGAPRKRLTLLVYAFISALAKSFAADGLEDIGRVVEEYRITKKLREFAVALS  
RTIPDEPENSIDPSAEAEIAIAWALRADAKLFAASAVSNSGKKESAVGASPSAHDILEWA  
FSNALMRAALGVNHYRGTEYFNRRERFEAFIGLLPAFGWIDSITQIFPEGDVDAVEFWHLR  
AELLAHEADSGYLTKTLENVLAHASP\*

>SPBIB\_v1\_190010|ID:27162804| protein of unknown function [Uncultured spirochete bib]  
MDRRAARYAELLKTPIGSDIERYVRDNTVIFAFPSQDAADSWARALLASKVFKAVALDRF  
LGFPELLRTIGLDDERERESERAGTRMAQHADRWA WAIRALES LKGSEAQHSLVLRILP  
TLPGGESYSISHLRLVRLVPALYEIDAYARQSRKEPLGSAEKQRQFAFLREELEDL KAL  
ARHYRDFLNDQNIIDYHFLAQDQSLSSGHHVRAYGLKRDFARLGLGIEHEQSRLYFPESA  
LPDFSEIRLPPYIQFDSAIDEIEYVFASISEEIEQGLEPEDIAISVCRLNPQKAAWIRQI  
AADCGVPVSIRSGSPLSSTPFGRLRAIQQASREGLTLDALDSLAAFTSIQNRDPEAWRQ  
LRITAARAHIPSPSPNAAYVHGLWKESAQIGMSVLNLVQKYDALWKDITEVAQSKNFSGL  
YLAILRFLERWVDTTKLSAESYTDRSMRMALDELQAFVEREDAFQTSHFSPFEVYLAALS  
TKNYIPVMAENAVRVDFGTAGLAAISQYIIGASQDGLAAYFENQTALRSELASLLGLD  
GTYRIEELVALHSLGDAHFSFARESFDGYEVAHPFFGAALAEANANAMRNGTASVLSRVPR  
RVERAIWQSTTMLASDTPLALTKGQKQRFSEGFSAFPGLAFDTRTYAHPAPLDAPIAKR  
FLKATDSFDFDRDFAIFSPHSLRDRMRCGFRWFASRIGAADMYALDDL SMILGNFLHTTY  
QRIIRALMQHASASTSSEVTDDIFLDIFKQAAKTAEEMFASKGPGIRPALMTYFDRARH  
RLKTLQEFELAFQPYRREGFELPFEHVFDSEKAILRGRIDCIFSRIDESAGNAQCLVII  
DYKKNSIPKASAMRPRGQESSGVVDDSDIEDTASSMAVQELQVPLYALAEELDGKLVEG  
ALYWSIEKAEGVAYIAPPALPPGYGLAKAFKTA SETADVRAVLRQTLAAASMAVRNGELI  
DLALDRASCDCPFRALCRYWYFLES\*

>SPBIB\_v1\_190011|ID:27162805| protein of unknown function [Uncultured spirochete bib]  
MNKLDLDDAQR LA ACTKSTAVVTAGAGAGKTRALVGRFLYLVEEHVEPESILALTFTRK  
AAAEMFQRVYEALGRPENARPD LASRLSNAHIQTLDSFCREIVAGCATLYGYTPDFVIDE  
TACAEVAHKTA YRYVLEQM QADGLRELLGAFGFDAVVSDFASFSGSANVEPHWIGQH VCH  
RSFEIGMREFEQTGTSVVQQMQAIAARILDEAGKGTISDFKEGSAKTVRVAQVLEALDT  
DASKDGASPEPGTGSMQQFSRLKAFLDYIDKPENSVNFQRVGKKDIEIAIKEQGQLLLRD  
KLLKLRQIIDFELFLPQYRAAMERLDEYADALCEEKRRANIMNYKDLGALAVDILSRQ  
KDIREYWASRFYILIDEFQDNNAIQKRLLLLLSQEPGIEPGPASAESSTGAGRPAKIAE  
GKLVFVDEKQSIYLFRGADVSVFKALASELAAERFALARNYRS AKALIDFFNEVFAVVL  
QPADPAQPQAFEAIYERMEASPEPEPPGFVPRIEYHLVSDEVPLEGTSLQEEAGPGSSAA  
TSSGAAARVAKLGSALSARESMAFRMAMWIRNA VESSPLYIRCKDSL RKAEYSDIAILM  
RTTSRQYEIEKYL RMLAVPFVTETTASLFT EAPVNDLYFILRLLLD SHDLFATAAVLRSP  
LCRITNDGYVSILTEKLSLAELRARS PS GALAGLSAEDQAAVQRMVFFYDAFSAIADHLP  
LMEISFAWERAFIGLSILSDPQRHPYLEHWN AIRSIAAETEAQGGHVPEFLRTLRAFID  
QKRLFDSSTIQKEEAQGVRLMTIHKSKGLEFPVILIPWMEAGTNKSGGSDLWGVL DAPPD  
TNQDRYFTIDIGFHDRADNGSNILQTQARTLRVEKEHAETKRLFYVACTRAIDHLIFGA  
APRSYDTSFHALLFQSTYKLHPSAAGYPEAERQQTENPQEERPAAEHAEATSSRHLAR  
IKLSFEPLAFEQEVHRERRATQKPD LAQVAAMYERARIVDLKRPARKLTVSAVKAHVRS  
EAPVPAFSPRII QETCFEPASEVFEKKRAAQEGTSDPAAFGTLVHELFAHLASGKPFETF  
SPSAMYRTARNSLRADTAGIASVSRNPTGTELQKKPSDEIARAYREL VPLLNSDCFKTLL  
QGNTVSIEYPFLLSIPPWMLEGRIDMLIEQSSEVILDLKTDARFAPIDYALQLGIYQKA  
IRELFPDKRVRAGLVYLRFGTFAWIEGELEESAIARYCEALAAAQE\*

>SPBIB\_v1\_190012|ID:27162806| Chromate transporter [Uncultured spirochete bib]  
MRMPARAEDITKTEPTWHIFLVLAQINTLTLGGGYVIVPAIGNAFEKQGWIEEEEFYRI  
FSRAQVFPGPALSTAF LASYRIAGVPGAIAAVLGTVLPPFFALILVGGFISLYGNTELF  
KRFLGGAGAVVPGLVASMLWKTTKNRKWSVRAVIEVVGLAILLVFPSAAFFLLLGGIAV  
FYIGRLVWKS\*

>SPBIB\_v1\_190013|ID:27162807| Chromate transporter [Uncultured spirochete bib]  
MEILSVSLAFFKIGIVAFGGGWSVVGLIKHEIVPRWMNAEAFNSLIAIAQSTPGPIALNA  
ATLVGWQKAGFLGALAATFSVILFPLLAMSSALAF AKYIPLKRSLADESLRSGSMAMILM

TLWTLLPRTALPMPWIFALAAFGITAFTKLNNAVYVILGAGALNMLIGALH\*

>SPBIB\_v1\_190014|ID:27162808| conserved protein of unknown function [Uncultured spirochete bib]  
MTEMANTHDIAKTAGTAGAPNAARAASAANAINAAPLFEAFSMPESPVDESMRRALFVQL  
TAQLLRSFAGRALSITFLAGAGTRWKASLLKARENPGAWPAGEVAASFPLDAPRGLFPV  
PDFIHGEKGEGRIAMAAYAVEAVRAIKEHILVVRGWEREIEAQVLNPLEMPHSRIAFFTQ  
KEGPDGQVSGHGDAALQCMSLWQNARYVVTNFAGDANSPLTVELALRAFAAFDAKGLIEIG  
VIIPVAMTEKPAYPVFLEENGLPAGFWHEKLAGSKPNAAPTSLTNVGIRVYRADWLRRAL  
LLLKERYYVEGQGPDAAGWHIPGNDPSKRECALDNVDNLLAEMRLARVMPVSLPRELTPLK  
SLGEYPAFVQAVKEVQREWREIRRE\*

>SPBIB\_v1\_190015|ID:27162809| putative ABC transporter, permease protein [Uncultured spirochete bib]  
MIPTYPEFAPLELDAREALYPNLNLLPDGISEFTFAGLYLFRHTYNYRISRLPDGNLVIS  
GHRREKSFFYLPCCFPSVDLFDKLMHQYDYMRHMSETQANQHRIELEARGYLVFEDRDNF  
DYLNRDLAMLNGRAYHKKRNLVNGFVSSYSCEQRAFTKARIKDALAVLEEWRTAKGVD  
GDYAAARDALEHFEVLGLRGAVYYIENEPVGWCLGEPLAKGKMFIAHFEEKACDRFKGIYQ  
FINQAFASLAKHYRYNREQDLGDEGLRQAKMTYRPVGFVKKYMFHPDRADFAPQPLE  
PPAECGPGTVHECSDD\*

>SPBIB\_v1\_190016|ID:27162810|pepT| Peptidase T [Uncultured spirochete bib]  
MNRTIEFLSRPYADEVMNRFVSYAKIDTQSNRHAEEPTTKGQWDLARTLERELREMGVP  
DVELDDRCYLIARLPASPGKEQAPCIGLMAHMDTASDVSGSGVKPRIIRDYDGKAVQLSE  
QYILDPAEFPDLAEHVDDTIIIVTDGSTLLGADDKAGVAEIMTAIAWLIKHPLEHGPIDI  
YFTPDEETGKGMDHFPLKKARAVACYTLDGGKAPEIEAECFNAYAVKAEFFGKVIHIGAA  
RGKLANAVAMAASFIGMLPRSESPEATDSWYGYCYPIEVSGTIDHAWTEVYLRDFSSDRM  
QERIAALKAFAAAVEVQFPGGQVKLAITQQYLNMKQKLDQAQPAVLEKLERAIKTAGFEPV  
MKPIRGGTDGSRLEMGIPTPNLFTGGYNYHSRFEWASVSEMALAVETIINLVLIWAE\*

>SPBIB\_v1\_190017|ID:27162811| NAD(P)H dehydrogenase (Quinone) [Uncultured spirochete bib]  
MNALVILAQPKKQSFNSAIAAEIVRSLGQOGYDPVGLIDLADAFNPVMPQEELPRKFSF  
DETLRYQERIQAADRVVFPDWGGPPAIMKGFDRVFRPGIAYGFREADFKNADAPG  
LFSQKRFDVFITTDAREPESGILNDWPPVMVWKENVLTFCGVTEADVHVFWNLRHSTYAQ  
RKAWLDSIHSMLAIQPRSAQD\*

>SPBIB\_v1\_190018|ID:27162812| conserved protein of unknown function [Uncultured spirochete bib]  
MAEKTEKFLEALLEMLKAVKDPELGYSDVLDGLVYRAEQTEDGIEVDFTLYIGCPLEA  
QLRRDIERTLQKKTGIRPVRRARLVWNPPWTIDRASDEIRLNMGYAIW\*

>SPBIB\_v1\_190019|ID:27162813|sufC| component of SufBCD complex, ATP-binding component of ABC superfamily  
[Uncultured spirochete bib]  
MQEGLIIRGLSAGLENKRIIDALHLEVPDGEVHALMGPNGHGKSTLANILMGHPGYAVEE  
GEVLFDDGENLLDLEVWERARKGLFLAFQYPAEIPGVTVSKFLKRIADLRRNPPRNTSVFL  
SELKENLRMLDIEPAFVNRYLNDGFSGGKRRMEILQLLTIQPRFAIFDETDSDGLDIDAL  
KVVAAGINHMRRGPGFSALVITHYRRLDLVKPDKVHILEKGHIVACGGFELVELLERDGY  
DGIRRIVANPANPEVREAVYEH\*

>SPBIB\_v1\_190020|ID:27162814|sufB| component of SufBCD complex [Uncultured spirochete bib]  
MSTESAALQPDSIRAIGEGYAERFGFSMPNRSIVKTSQGLTEETVRAISKTKDEPEWML  
RFRRLRALHLFQTLPMPTWGANLSQLEFGSMTYYSKPTESAKDSWDALPADIKSTYERLGV  
PEAERKFLAGVGAQYDSEMZYHNIREDLKKKGILFSDVETAVREHPGLVKRFFGTVPVPPD  
DNKFAALNSAVWSGGSFVYVPPGVHVDIPLQAYFRVNSQAFGQFERTLIIADEGSFVHYI  
EGCTAPVFSKDSLHSAVVEIILPNSRIRYSTVQNWSSNMYNLVTKRAFAYDNAIMEWVD  
GNIGSKVTMKYPAIFLMGPGARGEVLISIAFAGKGQEQDTGAKIFHFASNTSSVITSKIS  
KDGGTASYRGLVKVEAGLTNIKSKVECDALILDPHSRSNTYPTMDIRSEQATMEHEAKVS  
KISEEQFLFYLSRGLSEEEAAMIVNGFIDPLVKELPMEYAVELNRLIELEMEGSVG\*

>SPBIB\_v1\_190021|ID:27162815| SufBD protein (modular protein) [Uncultured spirochete bib]  
MSGTILDTLKVSRREKANDAAALLFPADSKSSGLKRLDIAISSPASGALSGAPQEPKEPA  
EYEQYREASIALGAGAEAAVLVRFVAAGAASQDRAADEPARMQDARLARAENPETPGSLR  
LTTSLHIRLAHAHARLNLYVLSNLPASFSREALSHAALSEGAVLWTVNVFDEGNGLYTTR  
IELEGESELDFAAGYGARCTTEGEHALSIHHTAPHSKSRTILKSALKDSAHLAFRGLIH  
VENTARGTDAYLANRNLVLEDGARAESFPQLKIETDEVACSHGATTGGPRQEELFYLSMR

GLDRAAAKNMLVLGHLGSVLNRLPPDLAEEMEDIAASALGLNAQGSCI\*

>SPBIB\_v1\_190022|ID:27162816|sufS| selenocysteine lyase, PLP-dependent [Uncultured spirochete bib]  
MKTTFSALAEGADISINAAVARELKKEYPIFRTLPNLVYLDNAATTQKPLSVLDAERDFY  
MQSCANVHRAIHTIGEEATARYEKARSSMARFIGAAPKELIFTRGTTESINLVARTFGET  
LREGDEILSVMMEHHANMVPWQQLAERRGVVLFKIPVTDLGELDLAEYEKLVSPRTRLVA  
VTMVS NVLGTINPIDRIVATARSAGVPVLLDAAQAAPSMPLDVKALGADFVAFSGHKMYG  
PFGIGILWGSETMLDRMPPFLGGDMISEVRLEGFSVNELPYKFEAGTPPIAQAIGLEAA  
AEWLSSVGLEALGEYESALARRFLDAIKDIPGLRVMGSARQRAGIVAFTLENAHAHDVAA  
YLDRRGIAVRAGHHCAPLARRFGVVSSARASFGAYNLPEDADAAARALADAQEAL\*

>SPBIB\_v1\_190023|ID:27162817|SUF system FeS assembly protein, NifU family [Uncultured spirochete bib]  
MSDPYQAIYEEIIHEHYKKPKYRRILEGLPYAENPSCGDRVRISIQVGDDGHIAAFAFDG  
SGCSISMSSADILAEDLIGKTPEEARAQVERFLAVLRGELDVDELDAYGDAAAFKGIARL  
PVRVKCAALAWRAALAQLDAIKSKGNKAAAS\*

>SPBIB\_v1\_190024|ID:27162818|atoA| acetyl-CoA:acetoacetyl-CoA transferase, beta subunit [Uncultured spirochete bib]  
MPEYIENKEIIAQRIARFFKTGDVVNLGIGLPTLVGNYIPKEVTVILQSENGLIGLGPEP  
APGGEDKDLTNAGGKAVTILPGGCFDSATSFGIIRGGHVDTYTVLGVLEVDQEGNLANYK  
IPGKMVPGMGGAMDVLVAGSRHVIAATTHFEKSGASKLRRC SLPLTAAHEVDYVVTDLGF  
FVVS GHSFILKEVFAPWTAEWIIAHTADVLAEDILLWEPA\*

>SPBIB\_v1\_190025|ID:27162819|atoD| acetyl-CoA:acetoacetyl-CoA transferase, alpha subunit [Uncultured spirochete bib]  
MIAKPVISAREAAALIQPGSVVHIGGFLGCGSPDAIIAALCEAHIGELTIVCNDTAIYDP  
KTGRTTGLAPLILNHLVRKVITSHIGTNAETQKLMSSGEIEVELVPQGT LAERIRAAGFG  
LGGILTPTGAGTEVEQGHVFEVNSRKYLLELPLPGDV AIIKAKKGDRA GNLVYAKTARN  
FNPIMAPACSLVIAEVEELVEIGTIDPDHVHTPSIFVDYLVTA\*

>SPBIB\_v1\_190026|ID:27162820|Na+/H+ antiporter NhaC-like protein [Uncultured spirochete bib]  
MENFGILALLPPVLTVLLAIWTKDVIVSLFLGIFAGAMTVAGGNPLQALVRLTDLLA EML  
ADGWNIRIILFCALLGALVGMWHKTGAAYAFGSWAGKKAKSKTSVLLLTWIFGIIIFIDD  
YFNSLTIGACMRPVTDEKKISRAKLAYILDSTAAPVCIAPISSWVITVMSYTKGSEGFD  
KLGISEFTYFIRTI PNLYALFAILMVAFVAFKGRDFGPMARSEARA EKGLGLFDEKKYG  
IVAGKLDQKAATTNATWFDLPLLLLIVCAVVFPPVTTWMGSIDGENIHNMG EAMASMS  
LGEAFNNTDASKALFYSIMFAIVFSYIYFLLRLLNISQSAEAIVDGIKSMVPAIVILSL  
AWSIGFIIKKSPEDGGVGLANYLAQAVRGGNFPLWLLPLIVFLISCVISFSTGTSWG TMA  
IMIPIAMPIAVALGEKMGLSGNALINITVYSTASVMGGA VFGDHCSPISD TTILSSTGAN  
CPHLEHVATQMPYAVFVAICAAFGIVTLGITDSTILALLVTA VLFVAVGIAVLPKVWGVQK  
YKLED\*

>SPBIB\_v1\_190027|ID:27162821|kamE| D-lysine 5,6-aminomutase beta subunit [Uncultured spirochete bib]  
MAHIIRPYGDTMDDGKVQLSFLPVPAGSRALEAARRIALAWGFHEAEV VHMAMPMSDEFT  
FFVVYAATQHGDWDTVEGDRDDSEKPMTMDEINAFIRAHIGR KVVVVGACTGFDAHTVG  
IDAIMNMKGYNHHYGLERYEMIEAHNLGAQVPNETLIDYAEAHNADAILVSQVVTQKNSH  
VHNLTEFIELLEAKGERGRFICIAAGPRISNKLA AKIGFDAGFGHGTYAEDVATFIVKKM  
VQEGRK\*

>SPBIB\_v1\_190028|ID:27162822|kamD| D-lysine 5,6-aminomutase alpha subunit [Uncultured spirochete bib]  
MVTNKLNLPEKIDRARELAKNICAPVLD FIDAHTT V TVERATL RLLGADGVSTEGAPVP  
NLVVDALRDKMSEGA AVWYANALVQTGLEQ GELDRRIAEGFN IATLPMGDRQKAKELAAA  
LARRQFSRIDANRAYRESKLEEFKGRSHSPLL YLIVATGNIYEDVKQAQAAALAGADVIA  
VIRTTAQSLLDYVPYGP TTEGFGGTYATQENFRIMRQALDEVMEREQR YIYQNTNYASGLC  
MPEIAAMGALERLDMMLNDSMYGILFRDINMYRTFVDQRFSRMINA YSGIINTGEDNYL  
TTSDAFEKAYTVLASQFLNERFAYAAGLKPWQMGLGHAFEMDPSIENGILYELAQAQMAR  
EIFPEHPLKYMPPTKHMSGDIFKGLVMDNMFNFVSKATGQGIHLLGMLTEAIHTPFMMDR  
HIAVETALYVMNGIESIMDEIEFRPDGLIVRRAHEVLDRTLGFMEEVERIGLMESIEKAM  
FADISRRTGGKGFEGIVEKGEYFNPVESMLERSLGLA\*

>SPBIB\_v1\_190029|ID:27162823| protein of unknown function [Uncultured spirochete bib]  
MKKPLPVPPHVL SFSQADSLFARLAPLSPYGKERVAEIGFFTD FEALSFYDDIEAAGAA

LDSLEHSARRDKLFWHLSRLTRIPESLAGTSGNSAPGSSGAANFSASNSAAKKISASSPS  
NADAWGLMELFLVKKFLVHYKGIFELLDDEARTRFGFFFSTQELLDVLSAGGSDAESFSI  
SERHEPALAAVRARIARLSETALERRRKLQEAARTAYGIDFAGREMLILPVDKALDAMGK  
GRLGQGPLLAADPYDSRSMIRLVPDTELLEAEEARRKARDEEKLEQAAIVRLSALVVA  
AKDALQSYCRAVKRFDYSLAQWKLAEQELGMVRPRLRARGTACIQCHGARFIPLEEECRER  
GVAYMPLDFELDTPVGILSGSNMGGKTCVLQTLVFLQLLAQCGMFVPAAAFETVVFGWID  
VIGAAGESRGRGLSAYGFEIRRLIEVLHAAKNEPGFAVFDEFHTTSAKEAQALMQAAVE  
QLASLSGTVALFATHIECSLPEGKGTAYRMAGLDSEARARSIIESTPAQSERSLDALLAQI  
NSLMQYKVIRTGKASAHAKSDALAVARLLGLDKDLVDRAQELLAESDTRRAPPAQDKQKE  
RGAE\*

>SPBIB\_v1\_190030|ID:27162824| exported protein of unknown function [Uncultured spirochete bib]  
MSLNAALFAGRNVNFIAGFAAASGKTMLAKAILALLREKGLKCALISAGYEGGGREPAGAP  
ALKMPSLEMPTFEVEKGEVFSTAANALPFLDCMPELIAGPVGSSALGPVILARAERSGSA  
ILAGPARSEALATLVEAARHLRGIDAVIIDGTLDRLTQISVLPDPQLYCAVRADRADCQQ  
IAKRMATFYQLVHLPKWDASRAREGEALIFEGALSSATLEKHKSARDIPILIKDITRVFL  
RPDEIASLSARGRLFIQQEISFRGFVVALRDIEPEEFMFYLPHDVADSILSWNPYEHEEG  
SRFAQQAQAADIGRSARYKRGDV\*

>SPBIB\_v1\_190031|ID:27162825|kamA| L-lysine 2,3-aminomutase [Uncultured spirochete bib]  
MQEFPDFWRRIPLYKEVTAKEWYDWHWQMAHNIRDIDTLAQVVPLTDKERHDISEVLKV  
FRMAITPYASLIDPANPVCVRLQAIPRIQETHFLASDQVDPLHEDVDSPVPGLTHRYP  
DRVLLLATNICSMNCRHCTRRRFVGHEDAHQSEELIDAAVEYIRKTPPIIRDVLISGGDPF  
VMSTERLERIIAKVRAIPTVEIIRIGTRTPVVMMPMRVTDELVNMLKKYHPIYVNTHFNHP  
KELTKEAKEACEKLADAGIPLGNQSVLLRDINDCPVLMKKLVQKLLVIRVKPYYIYQCDM  
SLGISHFRTTVSKGIEIENLRGHTSGMAVPTFVIDAPGGGGKIPVMPDYLITSNEKRVI  
LRNYEGVITSYEETPYHEDCGQCRICYDEPWLNPTCGVAKLLSGEEKVLEPKNLKRGKC  
\*

>SPBIB\_v1\_190032|ID:27162826|kce| 3-keto-5-aminohexanoate cleavage enzyme [Uncultured spirochete bib]  
MDRKMVITCACTGAETTKAQNPALPVTPEEIIADAAAYDAWRAGAAILHLHVRDGGKGNPTMS  
PRIFKKTMEIIRKCDIVIEITGGAVGDSPEARLAPLVELEPEMASLDCGTVNFGNDYI  
VNPLPVMRRFAEAFRKSRRVPTLECFDVGHVYASRILIDEGLVEPPFHYGFVLNVPGSV  
YSIENLLAFQHALPSGSFFTVMGIGRASLPAQYGAIAAGGWIRVGFEDNVYYAKGQLAAS  
NAELVERAARIAKEAQFGIATSDDVRSMLKLR\*

>SPBIB\_v1\_190033|ID:27162827|kat| 3-aminobutyryl-CoA aminotransferase [Uncultured spirochete bib]  
MAAKEYPRLKDRSMQMYTEAKEICPGGIMGIRRPYNFVEGEYPIFLERGYAGHIIDVDG  
NDYIDMLCAYGPILGYNEPEITQAVQAQLEKGFCSLVQPIQNELERRLVSLIPCAEQA  
ILVKTGSDATSLAVRIARGYTDRKYILRCGYHGWHDWCVEVQGGVPEEISSLTIEFEYGK  
LDDLEEKLAHKGEVAGVIITPVGHPNAKPVMAPPGYLEAVKELVHAYGAVLIFDEVRT  
GFRVSMGGAQERYGVTPDLGTFGKALANGYAISAVVGKREVMQVAEKKVFSSTFFPNL  
EMVAAMKCLDILEREKVPDSLWKRGTQFLARLREIERSGMPVTVSGIPPMPYMTFNPHP  
ADKEKTYRARREYFYTQTIRRGFLIQPYHHWYIAHRHTDADLEKALAAIEEALELTARRF  
PIGS\*

>SPBIB\_v1\_190034|ID:27162828|kdd| L-erythro-3,5-diaminohexanoate dehydrogenase [Uncultured spirochete bib]  
MPMGDKYGTTHRVIEPAGAMPQTAQKLDNDMSKLFNDNEILVDVIALNIDSASFTQIENEAA  
GDEEKIKAIIMNIVSTRGKQNPVTGSGGMFIGRVAKIGPALASRDLPKPGDKIASLVLS  
LTPLKIDRILAVHKDIDRVEIEGQAILFESGIYAKLPDDMDERLALAALDVAGAPAQTAK  
LVKPGDKVLVLGAGGKSGLLCCYEAMKRVGPTGRVVANIHSERSRTYIQDMGLAHEIVVA  
DATKPVFELTQVLSANKGHEFDIAISCVNIQGTEMAAILPVRDGGIVYFFSMATSFTRAA  
LGAEGVGKDVLMIIINGYTKDHAIEITLWELRENPKLRAFFESQYVK\*

>SPBIB\_v1\_190035|ID:27162829| protein of unknown function [Uncultured spirochete bib]  
MHDDLEKGRMLSSFNFKEYETVTANSNAFKGVEIDLMIELKDWKQSPGDPYTLLELRD  
GKTLVAFALIHRVSGRNFTDFIRFIVLDQDYRSSSAIQHLFDMIDAELLKIPFAVIRVE  
ISSVKRDSLGEQALENAGYSLIGHIPTYYGENDDFYFYIKAIFRNPPNFIKISKPFEDQA  
ASAAPLEEIHTLEE\*

>SPBIB\_v1\_190036|ID:27162830|yvgM| putative molybdenum transport system permease protein YvgM [Uncultured



spirochete bib]

MFDLSPLYISLRAATLSSAIVFVLGTVVARLCYTMQGRKATIVDITLTLPLVLPPTVLGF  
FLLVLFKNGPFGILLAKIGQRGILFSWKASIIAATVVSFPLMYRSALGAFRQIDQELLW  
AGRTLGMSEWKLFFVHVMVPEAWPGLIAGLALSFSRSLGEFGATLMIAGNIPGKTQTIPMA  
IYFATAGGDMQTAWIWVGIIVASCVSLALTTHFDSRRKG\*

>SPBIB\_v1\_190037|ID:27162831|yvgL| putative ABC transporter substrate-binding lipoprotein YvgL [Uncultured  
spirochete bib]

MKKRFFVCLFVLLSVVAGFAQGSSRQKTELLISAAASLMDCMNELKAVYMAKNPSIIRC  
NYGSSGALQQQIEQGAPADLFFSAGLKQMQUALIDKGLMDTSTVRNILENYVVLVVPKNGI  
KLSSFDDLNRNPSVTKIGLGDPKSVPAGQYAVQVFRNLGLSDAIAGKLVLAADVREVLFWV  
ETGNVDAGVVYSTDAQISDKVTVSAIAPENSHQKIVYPVGVVKDSAFPKEAKAFEDFLFC  
DEAARIFAKYGFVSVI\*

>SPBIB\_v1\_190038|ID:27162832| Molybdenum cofactor synthesis domain protein [Uncultured spirochete bib]

VQRGMKAICASSEKGTPKRPMKEATLKNWGLEGDAHAGTWHRQISLLSADTVDAFNRQ  
GANVADGDFGENLLAYGLDFPCLPVGTAALVCGDVVLRMTQIGKVCHSGCDIQKRMGKCM  
PTEGAFARVLHGGILRPGMPIEAYTAQRVFLCASDKGYAGERKDESTPALHHLVTEEGY  
EVVGTALLPDDREQLSALMARICDSYTADLLLTTGGTGLSLRDVTPEATIDIAERMVPG  
AELMRLRSLSVTARASLSRAVCATRKQTLIVNLPGSPKAAVENLQAILESLPHGLAILQG  
TQGECAVDSHI\*

>SPBIB\_v1\_190039|ID:27162833| Molybdenum cofactor biosynthesis enzyme [Uncultured spirochete bib]

MTDGDAGLRDSFGRIHTYLRSLVTEACNYRCRYCGPGVVHRGLSDDQLVFLCSLFRSMGI  
RALRITGGEPTVRPGLIPLIARLSSLGFERLALTTNGTSLVRDARALKEAGIQSVNVSLD  
AVDADLYASLTGGFPVRPVLEGIAAALSEGLAVKLNCLVLLADTYRNQVRQLMAFARKLGI  
PLRFIELMPFGD GARWEGVSTATLVAFLEEEYGEESPRGPKGSEPWGS GPAEYRRFVGGV  
DVGFIGALTSCFCSQCQRLRLTNEGQLKTCLYHPDRLDIRQLLERGSPPEEICRRIEAFV  
LRKQLRHAFQTGPVEWPLSSVGG\*

>SPBIB\_v1\_190040|ID:27162834|moaC| molybdopterin biosynthesis, protein C [Uncultured spirochete bib]

MNGAMTHVDEDGKAIMVDVSAKVDTKRTAIAASGRIFMSRQAFDAIAGGTVPKGDVLAAR  
IAGIMATKQTSSLIPLCHNLLTSAQLDFRLLSEECAIEAVCTVASTGKTGVEMEALTA  
TISLLTIYDFCKAIDRSMHVEDVHLQFKDGGKSGCYDRR\*

>SPBIB\_v1\_190041|ID:27162835| Molybdopterin biosynthesis enzyme [Uncultured spirochete bib]

VKLIRTQDAVGHILCHDMTQIIVGVTKDARFRKGVVREEDIPVLLSMGKENLYVWEKQE  
GMLHENEAAEILCNATKNDHMERSEVKEGKIELKATCEGVLQIDLERLLRINSLGDVIA  
TRHNYARVKKGDKLAGMRVIPLVIDAAKMDQVAIAGVSNPVLVSIKPYVIRRCTVLVTGN  
EVKKGIIEDTFSRVVEKKLAEVGVSVSRKILTDDEVYISSCIKQAVADGEEMVLCTGGM  
SVDPPDRTPKAIRNSGARIVSYGAPVLP GAMFLVSYIGDVPVLG LPGCVMYEDRTIFDIL  
LPRFVARIPVTAHDIASLGNGLCLKCRCTCTFPNCGFGNGGI\*

>SPBIB\_v1\_190042|ID:27162836| Molybdenum-binding protein [Uncultured spirochete bib]

MAFSFYIRIPFTSDGSFFGPGVNELLHNIDTAKSLSAAANMMGMSYSKAWKIIHVAEKKL  
GYPLTVKSIGGAAGGSSLTEKGRSFMERYDAFVADSYKAVEACFQRYFPEAQQ\*

>SPBIB\_v1\_190043|ID:27162837| UbiA prenyltransferase [Uncultured spirochete bib]

VTFRQFSGIVELRTKIVSASTYSIGLLYALAVKGSVDPLKALLLGVAGLLVDMGTTGFNT  
YFDWYRNVDDPRFNREEAKVLIHEGVSPGSALGISLICFGLAGAIGFALTWMVGLPLMVL  
GLCSMLVGGFFYSAGPKPISSTPFGELFAGGFLGSVYFCICLYVLTGTISGRFLLVSLPQT  
LAI AAILSANNACDIEGDSAAGRWTAVVLGKALAPLLIYVEMGSALLLLMIFGFSGILP  
LYSAWCAMLGIGVVFILNRMHRIGYSHETKGPIMGKISLAFMVQSAQAIALSLMLIFS  
KGFLN\*

>SPBIB\_v1\_190044|ID:27162838|guaB| IMP dehydrogenase [Uncultured spirochete bib]

MGFESFSGGAEGTLFDDVLIVPGYSEVLPSEVDISAELVPGIRLKAPVLSAAMDTVTDSR  
LAI AAIARIGGIGIIHRNMSPEAQAAEVYKVKRSESGMISDPVWLPETATLAEAEHLMETY  
RISGIPVVDPPQTERLVGIITNRDRRFCGPEMOKPISEFMTKQNLVTAPAGTSIEEAKAI  
LRQHKIEKLPLVDSEGRLKGLITIKDIFKRDEYPDAATDSRGRLLAGAAVGVGADLEERV  
ALLASRGVDVLVVDTAHGHSKKVIDAIRRISAAPHIPVIAGNVVTAEGTRALIEAGASA  
VKVGVGAGSICTTRIISGAGMPQLSAIYECAKAARAYGIPVIADGGIRYSGDIVKAI AAG

AETVMLGSLLAGLEEAPGELVLYEGRQFKSYRGMGSVGLALQGYGRDRYSGSQSNGKLVPE  
GVEGMVYPYRGKLSHYMVQMLGGLRSGMGYAGARTFTELKARMVRITAAAYAESHPSIV  
ITKEAPNYQKRD\*

>SPBIB\_v1\_190045|ID:27162839|purH| Bifunctional purine biosynthesis protein PurH [Includes:  
Phosphoribosylaminoimidazolecarboxamide formyltransferase ; IMP cyclohydrolase] [Uncultured spirochete bib]  
MPLALISVYDKKGLEQFAQRLARLGWTFLLASGGTSAALRGAGIEPVDIAEYTGSSSELLSG  
RVKTLHPAIHAGILARPEPADLEELRAHGYPIDLVVVNLYPFKTAQAANASEAEIIEQ  
IDIGGVALIRAAAKNFARVCVICDPEDYERIALEAESGGIGAETRRELAAKAFAHTAAYD  
RAIAEWFAQKAGGAAEREAATGAALASGILPASFEFRGIVERTLRYGENPHQKAFFVIPV  
GDWGGSFVSMRKEGSFASEGGSAVSPIVESGGPSPGQPQVRGSIGGSSESIQPIVRGPLG  
GRSDSIQPKVRGPLGGQVLGGKELSYNNLLDLDAAWRAVLSFEQPAAVIVKHLSPCGAAE  
AENLKDAYEALACDPVSAFGGIVALNRPLDVSTAEALRELFLECVAAAPSFEEDARDVLK  
AKKNLRLVEADPLVFSTLCKELRSAAGLLVQEPDRGDPIDTTWRVVSARQPTEAEMESL  
RFAWKLQHVKSNAIVLAKGHASVGIGGGQTNRVDAVRQACERAGARAKGAVMASDAFFP  
FADGIEAAAEAGVTAVVHPGGSVRDVEVLAADRLGLAVVHTGVRHFRH\*

>SPBIB\_v1\_190046|ID:27162840|purN| Phosphoribosylglycinamide formyltransferase [Uncultured spirochete bib]  
MSNVLRLVVLASGEGSNFQALLDAIESGIRGARIEGLVCDVPGAGCVQRAVQHGIPSI  
LPGPARAKRGSPERLAYDERLAVIVRSWRPDYVLLLGWMRLLSQAFLQHFPERVINLHPA  
LPGTFPGTHAIERAFEAFLAGSIEKTGVMHLVPDEGVDAGPVLRFVPIYKEDTLEIL  
TARIHSVEHREVVAMVEDLARSKSINYFYEKEIANASRADFGL\*

>SPBIB\_v1\_190047|ID:27162841| phosphoribosylglycinamide synthetase phosphoribosylamine-glycine ligase  
(modular protein) [Uncultured spirochete bib]

MNVLLVGSGAREHALAMAIAASPLCEKLVIAIPGNPMDVGEAAVALGDIEGLVSLAVA  
MQADLVVIGPEAPLAAGLADRVRQILCFGPSAAAARIESSKAFKAFMRRHGIPTAEG  
KSFSDAEQAKRWARNFVRPVVVKASGLAAGKGVIVPSSLEETEAAIDTLELGGDIVIEE  
KLEGEELSLIALCDGTSYKVLPAACDHKRLDGDGKPNNTGGMGAFAPACTIEEAEQLARI  
VIEPAMRGLAEEGTPFVGALYAGLMLTEEGPKVLEYNARFGDPETQAILPLIRSDVLVLL  
EACARGAIRVTPLDLRVSSAAVCIVLASKGYPERPVTEKPIRIGVLPERAFCLHAGTKKP  
GTKKPGDELVSAGGRVLSVVGLGASLEEARAVAYETVTQIHFDGMQYRSDIGNRADRVAK  
AICAAALGRVESHDSGAESAYAKAGVNIDAGNRAVELMKEAVRSTYGPVVAGIGAFGGQ  
FDASVLKGFVKPVLVASTDGVGKTSLSLGLALGRLEGLGMDIVNHSINDILVQGARPLFFM  
DYAAGKLDPEHVAEVVSGMAQACREAGCALLGGETAEMPGTYQAGEVDIAGTIVGAAEA  
EKLLPRADLSEDDILLGLASSGLHTNGYSLARAVIAGMDLEEVQPELGESEADALLRPHR  
SYLPLLERALEAQSPVKALAHITGGGMVENLPRILPHLDARIRADSWTWPPLFMLLQA  
WGSVSDEEMRRVFNLGIGMVVIVGANETDRMRALLPEPAFVIGKLVPGSGKVLV\*

>SPBIB\_v1\_190048|ID:27162842|purF| Amidophosphoribosyltransferase [Uncultured spirochete bib]  
MNLDCERFSHEPRHCGGSANGWRSKPRGPEYPDDSQPRESCGIVAVIADEAARVAFFG  
LFALQHRGQESAGIATLDKGSIHMHKDVGLVSQVFRDQNLALAGSIAIGHTRYSTTGKS  
SARNAQPFVIDTQYGPLALGHNGNIANAPALRKTLLSRGLGLMTGSDSELLAMMLAGTQG  
SDWIERIEAAMKEWVGAYSLVILTAEGVYAVRDPWGFRLAWGRIDAGGFVASETSLR  
VMGCSFYEEISPGEILHFDTKGLVQRARADIDVSHAACSFEYVYFSRPDSVWNGKNIHAV  
RRRLGEILAEAPAAADIVIPVPDSSIAAIGYARQSGIPFGEGLVKNRYIGRTFIEPTK  
ALRRQGVALKFSPLRETLEGARIVLVDDSIVRGTTTAPLVKLCRQAGAREVHLRIASPRI  
LHPCYMGVDMGTPNELIAVGKGEDEIARLLGADSLAYLSIEGLSEAIGVKGLCRACFDGQ  
YPIPVDEGFTKESFETERSAEASGHPETIGRGQV\*

>SPBIB\_v1\_190049|ID:27162843|purE| N5-carboxyaminoimidazole ribonucleotide mutase [Uncultured spirochete bib]  
MEAEMVQGRVVILAGSPADMAHVDAIQRALGSFGIMSLVRIASAHKTPCRLDMIGRYEA  
EEIPTVYITVAGRSNLSGLVDAATPYPVIAACPPPSEQWAMVDIWSLRMPSGVAPALIL  
DPANAALFVAKLFALENTELRGRIASFQKQNADRLIEEDEKVLKAGRAE\*

>SPBIB\_v1\_190050|ID:27162844|purC| putative phosphoribosylaminoimidazole-succinocarboxamide synthase 2  
[Uncultured spirochete bib]

MVSENLIQMLLPKAFNSTGRAEGEGKVREWWGLEGGTRFIATTDRLSAFDRVLARVPFKG  
QVLNELSAFWFRQTADIIDNHLISVPDPHCSVVREARPLPVEVVVRGYITGVSTALWRR  
YELGERVIYGQRFPEGMRKNQKLPQPIITPTTKGGPTGHDERLEPREVVEKGYLDARTWS

AVQDAAIALFERGTEVA VRAGLILVDTKYEFGLNSDGTLMMLIDEVHTPDSSRFWLASSYA  
ERFEAGQEPESRDKEFVRLAYAEKGYRGDGEPLMPDALWVQASLVYQELYERLTGMDFV  
PSAYPVEGRVLEALARERAVRRGVEAGAGKSRRG\*

>SPBIB\_v1\_190051|ID:27162845|purQ| Phosphoribosylformylglycinamide synthase 1 [Uncultured spirochete bib]  
MKALVLKAPGTNRDYDVAEAEIYAGGTTVLLPLSELRERPALLLDYGMVIPGGFSYGDA  
LGAGKLLALDFECFFAEAVMRFVEEKRPVLGICNGFQALIKTGILPGAPFERHTFTLAQN  
ARGNFECRWVRLRASTNSIWTRGIEGFSCPVAHGEGRFASLPNVVESLRVAGCIALEY  
ANERGEPAQGSYPDNPNNGSIGDIAGICNSDGNVGLMPHPENAVFPWQSASMPGWAEDGA  
LRLFRNGIEYARS\*

>SPBIB\_v1\_190052|ID:27162846|purL| Phosphoribosylformylglycinamide synthase 2 [Uncultured spirochete bib]  
MDMATRNFLYRIEVRNKGSGGPRIEALQADVRLSMGTLRSARQIALYFVEGEIAPEEMN  
LLGLFLFSDPVEQEFRWEVVGQGRSEIDAGGARTGDFGGAAAAEIVSLAPAEIAGAGAS  
SPRVVEICRKPVTDPVAIEIVRAAQELGVKGLKRAATGVRWELEADWLDEQSVARITKM  
LLANPVIERWEFGEIRPVFPQESARVPVETYDIAAMDDAALIALSAERRALDLEEMCA  
IRTWFAGAGRAATDVELEMIAQTWSEHCVHKTFKADVEVRGELWQKDAAGAAGKLENA  
QPHSPYPPVHGFSTYIKKTTEEIAAPWVRSFVNDAGIVSFDGQWDISFKVETHNHP  
AIEPFGGANTGVGGVIRDIMGVSARPIAVMDILCFGPPDMPEEELPQGS�HPRMIARGVV  
AGVEDYGNKMGIPVNGAIHFHPGYAANPLVYCCGVGLAPAGVHHHEPKAGDRVIVLGG  
TGRDGIRGATFSSMRMDGSTGDVAGASVQIGDPIVQKRTLDVLLAARDAGLYDAVTDCGA  
GGLSSAVGEMASELGADIELEKIGTKYPGLAPWEIWLSEAQERMVLA VPEVSVGAFALC  
SRFGSEFDIGSFRGDGRLVIRMRGEVLDLPMFVHKGIPQKRLVAEAPVKNRGQTTSL  
PKGAPQKVKKRGLTPFFKNVSCERIVRRYDYEYVQGGTVVKPFAGPEGDAPQDAAVLKPQG  
TGGAWGIALSNALRPDYAEIDPYRAAWAVVDEAVRNAVAVGSDPERIAILDNFCMGPND  
PAVMWALLESARGLRDAALAFGTPIISGKDSFYNEYLGPDGRRHAVPPSLLVSALGFVPD  
VSKAVTSFLKSPGDSIWL VGRFEPFSLDKDAAGAEADLGA VPGVDPGAQVVYKALFEAMQ  
AGEVAAAHDLSEGGLTLALAEMCMGRKGDIVLPPSQEPAGRAMKECAASPLGLHGMVR  
DLLLFGESAGCLLVEVRAGQDEAFGRHFGEQAFRIGAVSQMPVMRIHDGDSEILSVSIS  
DMLKAWKDSAGEVLP\*

>SPBIB\_v1\_190053|ID:27162847| Citrate transporter [Uncultured spirochete bib]  
MGRQDGAYASGLCEPFTGTSETVREWPCGLFLCTAEFRIANMGVRAVNVFILVVLVLYA  
GIIAMQDKKAWVSLGAGLVLVIGGATSASHAISSLINWNILLIYLGSVLAEFIYSRVP  
AFLAERIVERSPSVGVAVAIILLTGLVSAFVENVATVLLVAPVMIELARRTKKNLAQLM  
IGLAVMANLQGTATLIGDPPSMIFADFAHYSFNDFFRAGRPSIFFAIQLASIVGALYFF  
FYFRSMEGDGRSLPAERIVSWVPAGLLGLMIAGLAGLSALSAGGGIHSASGIFVVS  
LAGVGLGWLGWVRKERA EARNMVRHLDWGTLAFLVGIFVVVGTVSESGLLDGLGIALAKWTGGS  
AALGFSLIIAFSVLVSGFVDNVPYIAAML PVA AKFAATMGGRPELFMFGLLIGSCIGGNL  
TPFGASANIVAVSLSEKNGAKVNVWSWLKIAGSFTVLTVAAGLFWVWFVWR\*

>SPBIB\_v1\_190054|ID:27162848| conserved protein of unknown function [Uncultured spirochete bib]  
LRLQGEVFMHHFHFCNPACAYHQHAPKERWFVAAGFYVTKTFGKVQRFRCSFCGKYFS  
TQTFSLDYFAKRKIAYPQIETLLSSSMSIRALSRRFFSASCSTIQNRIDRLAXX

>SPBIB\_v1\_200001|ID:27162849| ABC transporter related protein [Uncultured spirochete bib]  
MNILSLKNISLSLKSGLPFESVRMDIDERDHIGLIGKNGAGKTSLLRLIAGLVEPDRGTI  
SRTKNFTFSYLAQNTEFDPSLSLREFLYQGESTEIRMLVQGPTLHGRDSKRDHEAQPPIS  
VENRYFALLRELGFSDFDAPMQHLSGGELKKAALARALAPYSNFLILDEPTNHLDVETIE  
WLESRLRSAQA FILVTHDRWFLDATVNRIAEIERHTLTLYPGSYAKYLEKKSVELASLS  
RSENKRLANLKIELEWLNRGARARATKSERKKEIEAMRASLIEKPAAYTFMSQEVRLG  
KKVCVLKDVSLAYGDRALFRGFSHEFLPGSKTAIIGPNGSGKTSLLSLIAGLRKPTAGSI  
TLGETVRLSFFRQTNEAVNPEMSILDYIQEHADHFRLPDGSSLDVLLERFGFERTFQM  
QKLRTLSGGEIRRLMLVRLLAESPFLLLDEPTNDLDIETIERLEEYLSDFSGSLIVVSH  
DRLLVDRLAQDMLIITGKTIERFTGTIFYFEWNIRKQQAETQFESKQKESALQKQKQSP  
KSQGGQFTLQSRKPQSTPARTKLN YKEQKELEHLTEHIEQMEQRKKALEEAFQGP KPGS  
SLAHAKKEYDEL CRLIESDLLRWEELADRL\*

>SPBIB\_v1\_200002|ID:27162850| putative Branched-chain-amino-acid aminotransferase [Uncultured spirochete bib]  
MTTDKENKGSRFESMCVPGSLEPADLASLDWSKLGFSVTVTPYMGGSVAGPDGVFEPCAV

VKTGVLRVPPQACALNYGQSIFEGMKARRGVDGKIRLFRPEANAARFARSAERFMMPAVP  
QDLFIETVTKVVKANRDYIPPAEKGSLYIRPVLFIGIKTLQPAPADTTMFVVYVQVGVY  
FKGMATISIKADDTFQRAAARGTGWVKAAGNYAPCFLPAYEAKHEGFSDVLYLDHDGVNV  
EEVGSANFAMVKGKLYVADSPSILKGITRDSVMRIAMEMMLGIEVVFAPLELERVLGLGK  
YASEGPADEAFCTGTAAAIPIGSMKWKGQSYTFGGGAIGPITQKLFDAIDGIQTGRRPD  
PYGWTVVVE\*

>SPBIB\_v1\_200003|ID:27162851| protein of unknown function [Uncultured spirochete bib]  
MPRSAKAIRWEIYSRPNKQKGPVYYVRAVDIQTKKALLTRSTGSDSRKAARELIAELSA  
KMDFTRLAAAKTGNVDAASASQMENMPLSEYFVLFWNKEKSFYLLARADSGKPLSSAYVA  
AQYANVKTHAEPFEGFKTTALRDANLFLIETYIRHLRAKGVSGNVVGDCLNAIRTPLSWA  
MKRGLVLEPFSFSGIIRPKETYRTRGMITREELARIIALDVADTIQPRPRLKKGETHETP  
GPVDLRIKVGVLHLGAMRAGEIRALRWAIDFEQNRHIEQNFVEGDGLKAPKRESYG  
IVPLAEPLREPLQALRTLAFKLGRYNINEYVLFSLTPNKPISIKGLEHGYSRLLEWIGI  
PPEAQKARRLTLHGGWHFAASLLADEIGPALARKITRHRSLQAFKGYDHESAEALDAARK  
ALQFEPKNEKAAE\*

>SPBIB\_v1\_200004|ID:27162852| transposase [Uncultured spirochete bib]  
MYRTKEKVPEFEKFDMMVFGGKLNQRWVILANLIPWDRVEEKYAALFVSNNRGPALPVR  
VALGALIIKEKSKLADEELVEYIRESPLYQYFLGFEGYKDELFPDPSMMVHFRKRLSGNI  
LKEINAMIIRQKEEAESHDDQEPPEGNGKGLIVDATCAPIDIRFPHDVTLLDEARRK  
TEQIIDTLHEQAPTGYEKPRTYRKIARKEFLRFIRNRKPREQTIRKALKKQLQYIERNLR  
IINDYKGLVGLGGLSRKQYSDLVVIHEL VWQQRHLYTKKSHSIEGRILSISRPHVRPIAR  
GKARGMYKFGAKLSVSLVNGLVEVHRLSWEAYNESQDLKGQIEQYKRRYGHYPEVVCADK  
IYRTRENLYQCQEY GIRLSGPKLGRPFAESEKNRAILREQRRIEREDESTRIAVEGKFG  
GKRRYSLDRIGTKFRKTSESAILMVLVLMNLMVLYRKKAKAFFVSLLDGLFKIVREHLED  
NTGCLLRDLTVKRGFFRNPYVQLYA\*

>SPBIB\_v1\_200005|ID:27162853| conserved protein of unknown function [Uncultured spirochete bib]  
MAIIRLEKVKKTYPLGKTVVPAVKGVDFEIQKSDFISLAGPSGSGKTTILNMIGCIDTPT  
EGVVEIDGVKTSDLNDKEITRLRHRTIGFIFQSFNLIPVLNVYENIEFPLLIGDTGISQK  
EQKKWIQFLIEEVGLGQWQKHRPNELSGGQRQVAIARALVTKPKIVLADEPTANLDSAT  
GETIINLMKMNKELGTTFLFSTHDQKIVDLADHVIRLKDGLVSENYRPAV\*

>SPBIB\_v1\_200006|ID:27162854| putative ABC-type transport system, involved in lipoprotein release, permease component [Uncultured spirochete bib]  
MVILKIAFRNLEHKVKTAIVGTLIALAVMFMVVTGNSILDTIRTGMKQSYSANYTGDLIV  
HGTSKDSFLLASGPGAASGSDIPQIPEFQTVRSSIEQMPQVQSVLPLLSGSASISLNEE  
TAGFTMLWGANFDEYALMFPDSLEFTQGGFPEEPGPYILLSVREAAEKETGKPLHIGD  
SITLAGFGASGSRLEATIAGFFRFKRGNEQLNLVSLIDANILRSLKGMTRNPMGVDIAS  
SSLGANGTTEAATTDELFGNGGSLVQTIQPVQSGALVNYDAILGDT SIRNRYTELDPNA  
WNFLLRKDSASIPATQESIQTMLTTGSIDAQVSDWSWGAGTVATLAMALQFIFNIIIA  
IILVVAIIIMNTLVISVTERIPEIGTIRAIGAGKGFVRRMILWETLTLVAVGLVGLLI  
GSVLLL VVNRVGIASSNMFFAILFGGSTLRPVLMSGSLVWVSLLAAVAIGLVSSLYPASIA  
LKIAPVKAMQKI\*

>SPBIB\_v1\_200007|ID:27162855| putative ABC-type transport system, involved in lipoprotein release, permease component [Uncultured spirochete bib]  
MLQMIRIALRNISRQKRSILLGSAIAFGFLVITLVNGFTGGLLKTTKENLSHLFGGHIY  
ISGSIVSPLGSELPMIQDSFAAEEAIIKASDRVASVQYRSKTTGTLYFGNKEQTQKLEGV  
DFAAEQSFRTNIDISKGLADIDKPGSLILPEATAKKLGV EIGETLLYRASTVTGQQNIG  
EFTLIATTTSSSVMMVMDTGYTSKAYLNTLIGLDEGDYQSINIFLKDVAEVQTVADRLYSN  
LASNAPVSPRISADSTSSPRNMSAMRSSLMGMNQIVQVAKEEQWKGTKFSVTTIEDLMSP  
ILSLLSIIQAVAFVFIILLVIIMVGMINSYRMVMIERTEEIGTMRALGVQKSGIRTIFF  
TEALSEAVLGTASGFVLALLIGGILSLINFGSGSFLSLFLARGHFVLQFSIPEALKNMLI  
ICVMSIMAVYLPARSAANLEPAQALRATY\*

>SPBIB\_v1\_200008|ID:27162856| conserved exported protein of unknown function [Uncultured spirochete bib]  
MRKRYALVSLVIVLLLVPMSGIFAQAASAVPDFKAMLKTIDERSNFTGRDFSAKIKMVSE  
DPEKGTTRVAKTFRRDRDDSFLILFMEPADQLGQGYLKLGDNMWVFDYDPQSRKFTHSSLK

ENVVQGTDAKNSDFRQSTYSVDYTVTSWTEGKLGAYDVWILELQGATNEVTYPYKKIYVTK  
KDQLLLKSEDYSLSKRLLRTSYFTSYAKIGTSYIANSVMYVDALVQGKRSTSITFTDISLD  
NLPDSVFTKAYLERVNR\*

>SPBIB\_v1\_200009|ID:27162857| exported protein of unknown function [Uncultured spirochete bib]  
MNMRTLFYSIVSAGLLMAGLFPLQAQTDDDELFGSSESLVTEAPLVKPVESASDISTGLL  
KTETVKIGGAFTFSLAGTAAGDSTIFSDYPTPSVVSADLYADARPADNFRFFIKGRFSY  
PYTSDSSGNNPFSREAYADIEPLSGINARLGKQTANWGVGYFFSPGNLLDFGTIDPENP  
TEERTGPLAVKFQRSQRTSNYYLYLLDLSAYSGGPIGLAPKAEWVLGSESLGAYWQND  
KPWAVTGSITFPMGPLDMFVEGAVKGNIDKNFLVLNGPALTAETRQDKIFGQGTIGFSWS  
MDDSEGRYSLSLRGQYYNGLGYENSDFIAYPMQVASLLQKKTITVQDLKERGQHYGAG  
SLGISKILSSDFGLSFFWLGNLSDSSGKTSATLSWSGLDKLNCSIAYSYAYGQEGTEFRP  
VGSVASSITLKVSLSMATF\*

>SPBIB\_v1\_200010|ID:27162858|regX| Sensory transduction protein regX3 [Uncultured spirochete bib]  
MKARVLVIEDDQALADLMVLYLEREGLECHIAPSAEAALPIMEQNEIDLILLDINLPGM  
GFEFLQELRTHCTVPIIIVSARETEEDIITGLSMGADEYITKPVAPRVLVARVRALLRRM  
HMQNNDEAGRRETQFGPYTIDFDACMLMKGSERVPLSAREFDVLAFLVENAGKTYAPEEI  
YTQVWGQQYGDITTIGVYIQRRLKKEANPAEPRYLITVKGKGYLFSYDN\*

>SPBIB\_v1\_200011|ID:27162859| putative Integral membrane sensor signal transduction histidine kinase [Uncultured spirochete bib]  
MTIKTKLLVIVLVIVLLPLISGGLLIAYQRFTAGTSSYFLLMESVQNVSRRVQLFLDSGN  
YDAFSKLPDGTIVIKSDDGRILFQNPITLDISAFGKDTKQDYHMFRRFSSKSGSGTVYLS  
YSSDVKTRDLYGLPFKIVFAIILFIIGTALGILKGLDVSIRKLENATKKIASGDLDFP  
ADEFITSDLASLGQALDQMRIQLKEDRERRDRFIMGVSHDLKTPLAGIQGYTAALRDGMA  
DTPEKQQAYYKIIADKASILEGRLGHLINLAKVTTNEWYQTL EEQDLNSFLEETGRSLAE  
YASFHGGFFLEIKNELPKPCPLFDKDMIRRVFENLVSNALAYGDKTIPVLIHGRRVSDSE  
TLEIIVENGGTPIPEHRDKLFEPFRGDRSRNSSGFGLGLASVKSIIESHGWTINLDTQ  
AMNRTRFVIQIP\*

>SPBIB\_v1\_200012|ID:27162860| Alkylhydroperoxidase like protein, AhpD family [Uncultured spirochete bib]  
MAQQFYKKMYSLEPGYIILYQALRTMKYMVKGKRRKEISPEFIERIMLAVTEVNGCEVCT  
YGHTKMALEQGMSSNEEIQKLLAGVTDGIPDDEVKAVFFAQHYADTRGHPSAASWQQIVDT  
YGTTKALGILGAIRAIMFGNAYGIVLSAFRNRIKGPVEKSNLLYEISMMISIVVFLPIA  
AVHALVSSLLGVPIIKGE\*

>SPBIB\_v1\_200013|ID:27162861| conserved membrane protein of unknown function [Uncultured spirochete bib]  
VKTFKGILLIFGILGLTLLIWILATPSIEIPLDRLSHILAGLSLGLFLVFILSTRNKR  
IETWFGGLQNVYVFHKYLAIFSVALIFIHGRLSESVAEISNGGEKTL SAAFSGFGQILFI  
VLVLIALFSKKMKYENWRIFHRLIIPYALGVYHTYFSSRYNLF EFSPLSIWVGLTSLMG  
LSAGLYMLFFYQKAQFRYKGGKITDIKRV SASSIEIAIKLETTLVYQSGQYVFLKIFQKGI  
EKAPHPFISISGGDGSIIYLTIKGLGDYTKQLYSELKEGTAISLDGPYGHLD FEKGRDKQL  
WIAGGIGITPFISYLKHTADKTITL FYSFRGEEEA VYKDFLEKYQKDNPRFSVHFVDTA  
KSDRLHFDGYELEAGTDVYICGPEKMIKQHSRYFKRHFKNARIFYEGFKFK\*

>SPBIB\_v1\_200014|ID:27162862| TRAP transporter, DctM subunit [Uncultured spirochete bib]  
MTLVLFSGSVLVLAVGAPIATAMAGSGLITILLSGLFN PENAINPVQAVQSFFSSIDSVA  
LLAIPFFILAGDLMNKGGLAKRLVNFAGMFVGRITGGLGMTAVLSCMLFAAISGSGIATA  
AAIGGVMLAGFKDHSYPKSYATAIVASASPVGIIIPPSIAFILYGTLSKASVGS L YKVG  
PSGILIIALLVTYLTAKKHKIPRPVRLGNKSVKEVVIDTLVALGTPV IIVGGVFLGI  
FTPTESAIAAVIYSIIVGVFVFKEIKLKDLP SILMQSAISSAGIMIIIAAASLFAWVMY  
LQIPQKAFAEAVLSLGMNKYTLLFAVNITVLFAGMFLESSAIQVIIVPLLLPILEALHIDL  
VHFGIILTTNLAIGMVTPPFGLTLLTSSRVLGASLKDSIAEVWPFLLSLIVVLFIIITYFP  
SVIMWVL\*

>SPBIB\_v1\_200015|ID:27162863| putative TRAP transporter, DctQ-like membrane protein [Uncultured spirochete bib]  
MKLLFKISDTIDRICGWAIVSLFSIMIISFALQVILRYFIGTGFKWTEELTRYANVWAVM  
IGFAMIAKRRNHINISVLEEILKGRNKKWLIIVQQLISLVIFTIMFIISFRLIKLAGSQL  
TTNMRLPKRWVYWIYPPAFS V FVFQTFIGILQGIQDVKMTSEVQA\*

>SPBIB\_v1\_200016|ID:27162864| conserved exported protein of unknown function [Uncultured spirochete bib]

MKKRLIGGMIVATMLFVVVGGGAFAQKEIKLGHIAAPNTAYDNWAKEFKRQVEEASNNKYK  
IIYGGGQLGGSTALMEGLQAGNIQLAVITTSINQFVRELDVLDLPLFRNWDHVEKFL  
ASDVNKKLLTFGDQYGLHFLSNMPRGYRHVTTSAKVGPIPKPEDLKGVKIRVAESSLYID  
TFKALGANAQAMAWGEVYTALQQGTVDAHENTIVTTRDYKINEVQKYMSETGHVFAFATL  
MAGYDWRKLPADDQIIFQKAANDSAIKLGIIQKNDEAKAKADLISKGMIFNSVDTAPFI  
EKVKPVIDKYAKGEIKKLYDEIVAIR\*

>SPBIB\_v1\_200017|ID:27162865|mhpE| 4-hydroxy-2-oxovalerate/4-hydroxy-2-oxopentanoic acid aldolase, class I  
[Uncultured spirochete bib]

MSRISITDTSLRDGSHSVSHQYTSSDVEKVVAALDDAGIDIIEVTHGDGLGGSSLTYGYS  
VENELDLVSTAVKVAKKAKIAVLLVPGIGTLELLKEAHKRGASVVRVATHITEADVSEY  
IKAAKQMGMFVVGFLMMAHMADIDKLEQARIMESYGADVIYATDSAGALLPDDVYARVA  
ALKNALRVPVGHHAHDNLGCAIANSLAAKAGATYLDGSLGGMGAGAGNAGTEMLVAALK  
KSGYEIGADLFKTMDAAEKVLLPLVVEKQKQMPHDSNSLIMGYAGVYSSFMLHARKAAE  
RFGIDVRNVLIEVGRKAVGGQEDWIIQVAYDLAKATGKAI\*

>SPBIB\_v1\_200018|ID:27162866|mhpF| acetaldehyde-CoA dehydrogenase II, NAD-binding [Uncultured spirochete  
bib]

MAKKIKSAIIGPGNIGTDLLFKLQRSPLLEVA YVVGKESPGIEIARKFGIPTTIKGUIDE  
MLAVDEIKIVFDATGAIPHLQHAPKLKAAGKIAIDLTPAAVGPYVPSVNLDESIFALDN  
VNLVTCAGQATTPIVYAINRVAEVYYAEVSSVSSKSAGPGTRQNLDEFIETTTKALQTI  
GGADSAKTIIVLNPAEPPILMRNTIHTVRKPDLAIRASIDDIIKKLRIYVPGYRFLVE  
PILQDDVTTVIEVEGLGDFLPKYAGNLDIINAAAVFIGEQFAQRILEGRR\*

>SPBIB\_v1\_200019|ID:27162867|mhpD| 2-keto-4-pentenoate hydratase [Uncultured spirochete bib]

MALSKYEIDAAANDLHNAWVTANPVTLSDRFPNLDVDSA YEIQMLNVERALAAGKKISG  
KKIGLTSKAMQNMLNVDTPDFGHLFSDMEVKDGRIERRRMIQPKVEAEIAFVLSRDLDMP  
GEILVEDVLESTEYVIAALEIVDTRIKDWKISLVDTVADNASSGMYILGNVKKKIYEIDL  
KAEKMDLDFKNGEKMNSGSGTDVLGDPAFCAVLANKMRNYGTLKKGEVILSGALSAAIA  
AEKGDTFKATYSSLGEVEVTFY\*

>SPBIB\_v1\_200020|ID:27162868|todF| 2-hydroxy-6-oxo-2,4-heptadienoate hydrolase [Uncultured spirochete bib]

MEEKNQANPEIGESIITGGFKTNYHDVGSQDPVLIHGSGPGVSAWANWRLVIPKLAARR  
RVIAPDMVGFYTERPENIDFNMDMWGKQLVDFLDALNLEQVDLVGNSFGGALALWMAIY  
HPDRIHKLVLMSGMGTEFKITKGLDHVWGYQPSLEAMRVAINSFVYDKAIATEDLVKMRY  
EASIRPGYQETFGRMFPAPRQKGVDMMASKYADIAAIRHETLIHGREDEIPIETSMTL  
FQLIPNAQLHMFQKCGHWTQIEQNLRFVAVVEAFLAGEF\*

>SPBIB\_v1\_200021|ID:27162869| Transcriptional regulator, IclR family [Uncultured spirochete bib]

MRRLSELCSALYNHGMPRKPKALSTASYKEDKSTDATPTVTQEPNRAFTPRPSGYIQSVD  
RALSILEIFSSRKPEIGVSEIARLLNLNKSTVFGLISTLERRGYIEQNPDNGLYRLGLKT  
IELSQNKLSAFSTAEIAHPILRKLVDTVKETVHLAIYDRGEVVYIDKVECDNALSIAFI  
GKRNPAYCTGVGKCLLAFQTDEEIERVLRPLEKRTPKTITEIKRLKDELATIRKSKIAIY  
DDEEFSIGLKCFAAPVIDARGAVCAAVSISIPTIRLDVERESFLETSVRGAAKASEALG  
YQNQ\*

>SPBIB\_v1\_200022|ID:27162870| protein of unknown function [Uncultured spirochete bib]

MRFPGSEDKFSYVLGMPFGTEYIKAITSTKPFATMEADFSDLQGPAAAITRGLSVVSD  
STRAEALAVYAIMP\*

>SPBIB\_v1\_200023|ID:27162871| conserved protein of unknown function [Uncultured spirochete bib]

VPSLRISFQRTDEQIQPGSEIKINWNQIFASDDQILQNPSTLLLRPKYTVAMFMGEKELY  
SHEATIIIAFSVIDQSAFEKAWENDEARKIFHEKQIMKTLWPILRQQVLDGMTRLGLPGI  
PLPWII\*

>SPBIB\_v1\_200024|ID:27162872| Acetyltransferase [Uncultured spirochete bib]

MNITIRNETPEDFRRVEEITREAFWNLYVPGCVEHYLAHVMSHEDFMRELDVVALADGR  
LVGNIMYTRSFVENEQGGRLTITFGPVSVLPEYQRKIGSALIRHTIQKARESGHAAII  
IYGSPYNYCKHGFKSGRDFNIGNAEGRYPFSLVLELKEGVFAGHAWKYHESVVFIDPA  
AAEFDRTFEPKEKGRWRYTQEEFSIACRH\*

>SPBIB\_v1\_200025|ID:27162873| conserved protein of unknown function [Uncultured spirochete bib]

VRYFISIERIKLVRVSWLLYIQVDVDEHPDERGRYIITGSHQLHIRAKVSQSLAGRTALL

ELLPLSIEELNAGIAMDRDEYLVTGFLPRIYQEGLDPSMLYRNYQTYVERDVRQIASI  
RNLLAFETFLKLLAGRVGQILNLSDLANSTGVSSTLSEWLSILEASFIVYRLKPYFRNF  
GKRLIKAPKLYFLEPGLVNYLLGIRDVQQIPTHPLLGGMFENLVVSEAIKACLNARMNPN  
LYFLRDSKGLECDLLVERENRLMPIEIKASRTFSADFCKKFSAIRKLDPAFETGVVYGG  
DRSFEYAACKVIGFADTAQLFGGKTPADQQVIMK\*

>SPBIB\_v1\_200026|ID:27162874| protein of unknown function [Uncultured spirochete bib]  
VNIHTAGSSTSIQVKEMYIFYQRIFSILTLHQMD\*

>SPBIB\_v1\_200027|ID:27162875| putative Metal dependent phosphohydrolase [Uncultured spirochete bib]  
MRFPQLNYAPKKIQGFYIFLFMLVLFTSLYGFYRLKSHDFSMYIESIQHSSQIIVEQTAN  
IVSYGFFQWDQMRHAIATDNIQFYQEQFDKIKELEPKYIETVTIQKEALNVEQMYQIAKQ  
GNALAIRFRIFDDLGNPLEGVYVLAEFNYKKLLSQLDSRHVLKIADQGYPLPFGFNAAA  
SKSLLGIGHYLSAISVALLVLLMTTFEQQSIRNHYHEDGLYRIISLFEKDSYATANHSR  
KVALISEFIGKKAGLRGAALRNLTIAALLHDIGKIGVPEHIIDKQDKLTDEEFKIMKKHA  
NLGAEIFRLYPEISHLSDIVLHHHERIDGSGYPEGLKGDPEIPFAARIIAIADVYEALTAD  
RPYHKATSPEQAVRTMASMPLDPMLEIVKNDFQELEAMLRKKQEEA\*

>SPBIB\_v1\_200028|ID:27162876| ThiamineS protein [Uncultured spirochete bib]  
MKITLEYIGFLKIEGIKSGTVVEAPNGSTAASILDMCKLTGSYRKYIVPIINGERSSSHDR  
VLKDGDRMFIYLPVGGG\*

>SPBIB\_v1\_200029|ID:27162877| Thiamine biosynthesis protein ThiF, family 2 (fragment) [Uncultured spirochete bib]

MVAANMHGPKTAKPGGQAKGADFLARNPPALEHIAGKRVGIIGLGGLSNIAMMLARAGI  
TSFRLADFDTVSLENLNRQHYFSAHIGLAKTDALAAQMKALNPGIELELWPTRIEEEDLD  
AFAQDCDVLVEAVDDAATKAMIYAWFRQEKRALWLVTASGLGGLEPANTIRTMHLAGKLI  
ACGDFETSSSENGNGVCAPRVMLVAAHQALAVLRILAGVEAEA\*

>SPBIB\_v1\_200030|ID:27162878| conserved exported protein of unknown function [Uncultured spirochete bib]

MQKISRFTLSLLAVAFIAFVPLAAIAGDNALTITGTVVEVQKYGNLTVDIKPKALYDAG  
FALGDVLNVTIGGNVLKIPFCTSYSDVDTGSLVVRDDQKNNLLVVAINMGNFSTKYNAKV  
GDTLTFGLAEKAGYLSEYLIRQLKRTNVRSDYATDSIFANFRSIATTGIKPLVYRSSNP  
INNEIGRAAYADALAQAVGIKTVLNLSDSEADIQKYLAAPGFKSNYYKSLYEAGVKALN  
MGVDLTAPEFGAKLAEGLRFLIQNDGPYLLHCTEGKDRAGFVSAVLESMLGARLQEVVAD  
YMMSYENYYGVKKGTDQYTAIANSNIVTSLTTAMSGLPKGTDISGMPLAKFAQWYLSIG  
LSSDEIAALKVKLSASAVLKAPNVTGTVTQIEKYGHAVTDITIADFNALGFKFGDMVTVV  
FDNGFVLEAPYLDGYVNNGDPLVRAYPGQTNIAVCINYGKLNVAQVDVGSKFTIMLSR  
PGAYLTQYEIRRLVRSNKREDYTSDEVFANFRNIALGGIAKGVLYRSSPIDNQLGRAAF  
ADRLIKEAGVRTIVNLSADSADNMKNYLAAKDFASPYAALAGSNQVIFLNMNLAFADEF  
RANVIKGLVFMAEHNGPYLVHCTEGKDRTGFFAALVEALMGASKDEIVADYMQSYIDYYG  
VKKGTDQYTLISQDVLGMLKVIAGTNDLKDADLAAGAKSYLLQGGMKAEQIEALKAKLST  
PIAASDASPAGTLISAI FNAMRHQSREVFVS\*

>SPBIB\_v1\_200031|ID:27162879| Oxidoreductase, 2-nitropropane dioxygenase family [Uncultured spirochete bib]

MRAINSKLLHVAVKEITLISRELKALVIGDLSARIPPIQGGMGVGISLSGLAAAVANAGG  
IGVIAAAGIGLLEPDGFKDFLGANIRALRREIRKARSLTKGVLGVNIMVALSNFADMVRT  
AIEEKIDIIFSGAGLPMNLPEYLHGSTTKLVPIVSSGRAATLLARRWLERYNLPAFV  
EGPMAGGHLGFKAEQLEDPAFALENIVPEVIQAVRPFEKTGRKIPVIAGGGIYTGADIR  
KFIEMGASGVQIATRFVATNECDASIKFKNA YIEASKEDLRIKSPVGMPPGRAIDNKFLD  
DVEQGGKKPFTCPYHCIITCDVEKAPYICISLALLNAQKGNLENGFAFAGANAWRIEKIVP  
VQDLMDELVEEYEASYKG\*

>SPBIB\_v1\_200032|ID:27162880| Ketol-acid reductoisomerase [Uncultured spirochete bib]

MNTTFKSRVFAVEKVQFGPNEEYVVRGGRHLFLLPKAFDQIRQIGVLGWGSQGPAQAQN  
LRDSLEGTGIRVKVGLRQNSSSWKLAEEAGFRTEGTGEMMDVARESDLVLLLISDAAQ  
AELYPQIFKALKPGATLGLSHGFLAVLKIHGDKFPANINVIGVCPKGMGPSVRRLYEQG  
KHINGAGINTSFAVEQDIDGKATDYALAWSIAIGAPFTFQTTLEKEYLSDIFGERAVLLG  
AVHGIVEFLFRHYQAQGMSPPEAFVHATESITGPISKITISRKGLIGVYNSLSEKDKEIFR  
KAYGAA YRPNYEHREIYDEVASGNEIRSVILANKRIEAMPMAKIDGTFMWKTGEKVRAQ  
RNEAAIPLEPFTAGVYIACMMAQIDLLAEKGHAYSEIVNESVIEAVDSLNPFMHFKGVAY

MVDNCSITARLGARKWASRYDYILMQEAEPLWAEGKGEDEALMQKFLQHPVHGALSVAAS  
MRPSVDIAVQ\*

>SPBIB\_v1\_200033|ID:27162881| exported protein of unknown function [Uncultured spirochete bib]  
MKHSSLFKHYWWAALVSLFLAMSCASAPSAQAPSAPQSQAAVASSSGALPAPQQAQAQP  
GVAAPKSDIWPKIYDDETYLTTFDSSWSEGEAVGAIKNLQNAMVEFTAGIPFSELDVDPY  
GLRAKWSWTEGSFIKSANLIIPFDQVSYLLEHYPLNKEYKWGLLVGIANANPASIRTP  
TRDAAERLGKAILVLAKARGAKVSLPNVRFVGFASLSPLSEAQAQAAGILQSGGIIISWVFK  
ESPAEKAGFSPQDIITKADGKPVQKSDDLFSAINDAAGKSQIKIDGIRRSYRIDNKMY  
VEIFVPVTFTLAIEQAGGAK\*

>SPBIB\_v1\_200034|ID:27162882| exported protein of unknown function [Uncultured spirochete bib]  
MNRKRIACAAALCAVFAGALFAQGADPKVTPAWVTEKQIAQQTQTQTQAQPEAPKAKGF  
NVFFIGYDYPTLSGALAPALAAWNSPFNFSLGFESANSAGSSMLSGLELEFFIAAPSKGL  
RLQMNELVMIGYSLALKPVRFNIGARLGLSLLDVTDNNSASNTYTGLGGLVGPEASLYAE  
LAPDFWLWVRGRYALS YFMSLISNGASPLDTGSNSLNTLSLEAGLAFRM\*

>SPBIB\_v1\_200035|ID:27162883|aroQ| 3-dehydroquinone dehydratase [Uncultured spirochete bib]  
MKNLNIAVIHGPNLNLGTREPGIYGAETLDQINKEIEQEAKKCGATTEFYQSNIEGQLV  
DYIHSKAGKIDGIVINAGAYTHYSIALRDAIAAVNIPAVEVHLSNIYKREEFRHTSVIAP  
VCIGQISGFGAYS YILGLHALLHALGQAS\*

>SPBIB\_v1\_200036|ID:27162884| Methylase involved in ubiquinone/menaquinone biosynthesis [Uncultured  
spirochete bib]  
MNHRRERHARLFNRIAIPYSWFFAGQTRS YARCFDIGRTALPSPQGKRALDIGCGTGAFTS  
ALRAEGWDVEGIDVAQEMIAHA AKSGLRCSVVDILGAHSIADTSFDLVSAAYVAHGLPLE  
DRLILYRECKRISKDTVLFHDYSENKRLLSIVEYLEGGDYFNFIRTVRQELADNFSDVK  
VLRVGPQSAWYICKP\*

>SPBIB\_v1\_200037|ID:27162885| protein of unknown function [Uncultured spirochete bib]  
MRPKDIDHRTAKTGFCMRNHFLSHINAFDIPSFSPQRRRERPCAADIERPLALRRRQG  
CSSDIETSGIGSRLAGKKPAVGYGDAVEKPSMALAMIHVQTIYL VVSAKSG\*

>SPBIB\_v1\_200038|ID:27162886| putative Membrane-bound serine protease (ClpP class) [Uncultured spirochete bib]  
VHRSGKRNLRLRYAGWLPFFMMLITLPAAHAASPRDIIFGGIAWGLRQTSGPVDPGPNTF  
SNSPDQVWVDEQGRAHLTLQKRDNVWTASEMMAKKDAGYGT YRFTVSSSVSSLDPNIVFG  
FFTWDKAPEAFNREIDIEISRWGVKDGPNGWFTVQPYDVPGNQHAFNLPKAASYTFEMRW  
DKGLVEFVLYCDGKLSEYWKYAGRVPEPGRARLRINLWLFGRKAPQGPYPYEVVISDFSY  
VPSR\*

>SPBIB\_v1\_200039|ID:27162887| protein of unknown function [Uncultured spirochete bib]  
MRKRVA VMGAGISGRHSLNRNRWGK WYRWLRRSKKRMRLRMGILYYVLRSGHIPLKTKLL  
GSLALGYFLSPIDLIPDFIPILGQLDDA IILPLLIAFTLRSVPKELVRDCARKAIREPVS  
LSKNWRAGAVVVL IWI FILALLGCWIIKCIHA\*

>SPBIB\_v1\_200040|ID:27162888| conserved protein of unknown function [Uncultured spirochete bib]  
MDMTKDGEKMKLTARIFFIAGFYV VRYIIYGIKISGTKNIERCKSPLVFVSNHEGAFGPV  
SLLSTLPVRAYPWVTHEIMSRRECAAYLQKDFTEAALKLGPRLNAIVSKIICYACVAIMQ  
ALRAIPVYRNSRKILGTLQYSLNMLEQGNILIFPEIPSTAKNTQLGDLYTGFLHLARMY  
YSRHSQPLTFVPIAVNKKARRV SIGSPVIYNPDNPFWLEKERLKQEISGEIQDMFSSMEE  
ARISG\*

>SPBIB\_v1\_200041|ID:27162889| FAD-dependent pyridine nucleotide-disulphide oxidoreductase [Uncultured  
spirochete bib]  
MKIVIIGNGIAATSAATKIREFDASCEITMLSDENTPFYSRPRLLDYL AGKVSFEQITIK  
SEQWYNKLNIELVSGAKVFSITPQENKIITSKGDISYDALLV ASGASAATPPFFRPDLKN  
VFRLRTKEDADRIIAAAQHVRTAAIIGGGLLG IETGFALTSRGLTTTVIEIADRLLPKQL  
DAESSLLLKASLEEKGLRFLTGKQAAALDADREGLCITCTDATVLRADIIVVSAGIRPNV  
GFLEGSVNVGRGIIVDEKLRTNIGNIYAAGDCAEFRSTLYGIWPAAKEQGEIAGAIAG  
QDAVYNGSIMSAKLVVGVIEVASIGDIAVGLGTRTESQREGSSFRKLFYENGR LKGAILI  
GDTSDYFKLQKEIALPAPRQSA\*

>SPBIB\_v1\_200042|ID:27162890| MATE efflux family protein [Uncultured spirochete bib]  
MELAFHLHQSTAQRDRILNGPISQTLFLAAPTMLGIVQALMPLMDGLFINNIAGTLVA



SSVTFSEPVINMAMALAQGLSVAAMAIIIGQLNGRGSFDESKRTSTQIVVMGSILGCLSAP  
 LLVVAIIISARINQQISHNVFLYLSLYALVLPFSFLESIYNGLKNANGKPEAPFIRMVL  
 MLALKILFNFVFIYALRLGIVGCVLSSLAANILITVWMFWELFVKKGPDRLELRGFRFDM  
 MAVRQLFQVGAPAMLNTFILNLGFFLINTEVEKYGPVVLNGQGIANNITQVAFILPGAFS  
 SAVTTMVSMNIGAENPGKAKKSLVGGAVLSAITAAIVIAVIVPLSSHLTILFTRRADVLE  
 IANRALHIYTYSVIGFGVTITIQGAFIGLTKTRVPLVLGVLRWFLRYLFILATEKYLYKY  
 YAVFWGNLFSNYTASFAIAFLISRTRWESAIRQKEPKSS\*

>SPBIB\_v1\_200043|ID:27162891| transposase (fragment) [Uncultured spirochete bib]  
 VTDRQGKRTKSLVNERQIVVYSAQYAQRARMERALAVEKASGQIYALSKDAKPSAYGAAK  
 YLKKVPFDRSTGECMPETEYLVMLDEARIEKEEQFDGYVICTNVIGREQGEAPFSGPYR  
 YTPDGGFFQLNRTVTDDDIIEIKGLWRIEETFKVMKSELKARPVFLSTESHIRAHFFICF  
 VSLLLMRLLERYLDWQYSAAAMQALASACGTSVGKNLYVFDYYDAVLEAIGKNLGDIFS  
 KQSRTLQEIRHLLAQTKRKH\*

>SPBIB\_v1\_200044|ID:27162892| protein of unknown function [Uncultured spirochete bib]  
 LLASNDIGADDIVAVELLLLFDPGFIEHHQVLSLGHAFAGAAVEGHLLEVLRRPIGAWFC  
 ILRERIDLSRGFLDRERALHAGTLGILRTIDDNLPFVHKALGPFPLAVGHPYLSGRIATL  
 VFGKERA VRIVDGSIAXX

>SPBIB\_v1\_210001|ID:27162893| transposase (fragment) [Uncultured spirochete bib]  
 MFLGTYEKKTGRTRLKIVEAYRQDGRPKQRMIDLGYLDELQKIYPDPIAHFKQVAQQM  
 TAEKKAQKESRQVQLDPYAALRPFDPAPATISRKNIGYAALSFLYHELIDTVLNNRQR  
 GTKFSANLNSIFKMLVFSRALFPDSTRGAWENRGIFFEEADYSHDEVYRALDYFLAWRPA  
 LVRQLHERLKTRYGRQTLFFYVDVTNYFEIDEPSLRAKGVSKHEHRPNPIVQMGLLLDA  
 QGLPVS YEL YRGNTNDGTTLPSMLDDAVLDLGMHHLIMVADKGMMSGDNI AKLRLGHG Y  
 VMSYSVRGADKAFQEYVLDEEGYTA VYD TDGTL LAKHKSRYAPREIWVTD RQ GKRTKSLV  
 NERQIVVYSAQYAQRARMERALAVEKASGQIYALSKDAKPSAYGAAKYLKKVPXX

>SPBIB\_v1\_210002|ID:27162894| protein of unknown function [Uncultured spirochete bib]  
 MXEYSTVLNALQCITYNIMKNIVKKFLAAYAKRNYFSVPLKETAKVRRREKFI\*

>SPBIB\_v1\_210003|ID:27162895| conserved protein of unknown function [Uncultured spirochete bib]  
 MPLLQVRDCPEDIYKKIVLAARRKNRTIAQQTVVLLGKSLGQEE SNIERRKRLLEKIQTR  
 NISSETTKEIDAVALLREDRDR\*

>SPBIB\_v1\_210004|ID:27162896| PilT protein domain protein [Uncultured spirochete bib]  
 MTAVLDVSA AIELLLQRDKKDLFTATYEKASWIIAPDLYIIELSNVLWKHYKAQKISHAE  
 CMQYVEDGIDMIDDFFEVKELWKEALGEGIRNAHSIYDMYYAVLARRNDALIMTNDEQLS  
 SICKKLNIEVVG\*

>SPBIB\_v1\_210005|ID:27162897| Mannitol-1-phosphate 5-dehydrogenase [Uncultured spirochete bib]  
 MKPMP TLVQFGAGNIGRSFIGQLFATSGYEVIFIDVAKPLVEAINARREYNIVIKRSSAA  
 DEVL TIRNVYALDGNDAVAEAVADTDYVATSVGLGALPHIFPVLARGIELRAQRYPRG  
 PLDIIIAENIHDGARYFRQSLEELLPPGFPLAENVGLVETSIGKMVPIMRKEDLATDPLL  
 LFAEYNELIVDKHGFRGLLPQIPTLNPVENIKA YVDRKLFIHNLGHAAAAYFGFSQSPG  
 TRYIWQALELPGLASKVRTAMRQSAAALVREYPNDLTLASLEGHIDDLLRRFANKALGDT  
 IYRVGRDLYRKLARNDRLIGAILLAARHDL PYSVIAEA VRAAISFRAVDEEGRL YPRDTE  
 FIANEVPKGLAGILRDVCGLRES DVIDREVIARILY\*

>SPBIB\_v1\_210006|ID:27162898| PfkB domain protein [Uncultured spirochete bib]  
 MLTISGTGCALMDYLYADVRLDSEAFVRYRSRQSGDGGLEPGKLVFVEDLERFAGKPFAG  
 ILEELTGGAKPDRANLGGPSIVALIHA AQMLEGHNAHIRFLGARGNDASADEIMNIVARM  
 PLDVSGYRAFEGHTPFTQVFS DPTYDQGHGERTFVNERGVADLFAPEHLPDSFFDSDIVA  
 FGGTALVPQIHNNLTALCKRARAGGAVVVVNTVYDFRNEAKGGRWLLGESDETYGFIDVL  
 VMDKEEALRLSGTESSEAALDFRAKGTGAAIITDGV RDILFYSDGSLFSVPALSGLRFL  
 APGKGS LPACSLPVSAEIRRVLASPKPKGDTTGCGDNFAGGLLASIAIQLEAGQKRGS L  
 DLVDACSM AIVSGGFSCFYIGGTYQEARPGEKKQEIEHYKLYREQLSANAADRARGE\*

>SPBIB\_v1\_210007|ID:27162899|zraR| Transcriptional regulatory protein ZraR [Uncultured spirochete bib]  
 MTKTATILIVDDEEGIRHGLTRLFE GEGYAVAGAEDVAQA EKIASAKKIDIAILDVRLKG  
 SASGLDLLARLKNEDSDLPV IIIITGYGSIESAIEAMKRGASDYILK PVDNEALLALVRRN  
 LEVAQLKRDNRYLKKELLQKTYQRHIITKNPEILNIARLDSVKDSTASILITGESGTGK

EVFARYIHFTSTRSAGPFVVSINCAALSELLLSEFLGHEKGAFTGAIERKIGKFELADNG  
TLFLDEIGDMSPSVQAKLLRVLEESSFERVGGTKRISVDIRVVAATNNDIHELIRTGKFR  
SDLYYRIAIVEIKLPPLRERIEDIPYLAEFFINMYAERYKKHIDGISSEVMQRWLSYRWP  
GNIRELQNVIHQAVLLCTGNRIEADTLLNCGDEAAGIGQGTPVASGAGAFRPERYPSLKE  
LGEAAAAYYERQRIESALAKANGNKSSAARALGITRKTLLLEKLRRYGIC\*

>SPBIB\_v1\_210008|ID:27162900| putative Histidine kinase [Uncultured spirochete bib]  
MRFFARTFNSFISVILQAILVILLVSGSITRSQEEDSKKELKTEALNVYDNFNSWKRAL  
WGTIVDLNKSSELRHMAAQKHIAPEPLEAYLRKAASQAGAEFLIKNNWSTFSAVRPL  
TEKPVSPKAQDFYIDRPHYPYVEMVLADNTLYFCGSVRVSADNGRYLDIFIVKRVDEALM  
RQLSFNSRVRALVSLNSHFVVGTIAGTGFLWVHMGRSFSTSYTVVNELVEEGVPYAVVIQ  
QSGNARLAGSQTDSPASLGNVPAKTEATLYICTFSLSEYRARVNFNRSILLVSLVAL  
FTILLSAGLSKAVTDPVSQLRKAMIRLKSGEKALLSGPKKGEIADLFQGFNDMSAQIAE  
DSRALSAAHQEITRIKEYNDKIFNSIQEKILVINAQFAVEKANRAFLEYCGQAEDAVALGR  
NIDELSLALFDEPVHTSIRAIISGGKSSDAQIRRTSSGHSFEIKFYPLLEHEAATTSIHC  
IMVIEDITAKVAYEEKIRQAEKLASISMLSAGVAHEINNPLSSILTNVQNLIKAERDLER  
LKDLQVEQETKRIARIVRSLLFSSSTRTEKPATDINAIRNIVQLVGYSFREESSIVI  
EPHNGENLPPAAIGEDECKQIILNLIKNALEAIGTSGRIRIETAFLPSESMVQCVCVSDTG  
KGIPNALLPRIFDPFFSTKAESGNSGLGLSVVYGLVSKFEGLIDVESEVGKGTTVRIKLP  
AAPSGLRQ\*

>SPBIB\_v1\_210009|ID:27162901| ABC transporter [Uncultured spirochete bib]  
MAHLLAKNITKRFGLTAVDNVSFHVDEGEVVALVGDNGAGKSTLIKISGVHVKPDEGE  
IFLNGQEIHIDSPIDAISHGIETIYQDLALAENMDVPSNIFLGRERTKKILGFVNVVDYE  
HMSSESARKVLDRLDIRIPSLKSNIRNLSGGQRQAVAISRSIYWNAKVLIMDEPTAALGIS  
EQKKVLELVSSLRQGIAMIIISHQMYDVFSVADRIIVMRRGIKAGERLVKDTSTEEIVS  
LIVGAESVEKRSQ\*

>SPBIB\_v1\_210010|ID:27162902| putative ABC transporter permease protein y4mJ [Uncultured spirochete bib]  
MQTETAEKQGTLPPELLGRNWIALFIVLLVFFSVVARSFFSFDTAQLIFFNGTEVFLLA  
AELFVIITGGIDLSVGFVMGFATVVSSKLMVACVALGFSPFWSILAASVVTLLIGLVPGL  
VNGWLVAACLRVPAFIATFSMLGVTHGISELLTQGIPTKNLPALAGDIGNGSFFYVAPGGA  
ISFFSRPQVARGQTVLAIIPNMVIFAFILFIFLFAFILGKMKFGRHLYAIGGNIDAAIRSG  
INVKRDLIKAYVISSLFASLAGLSYVMKYITGKPDAGANMLLEAIAAVVIGGASMAGGSG  
TVGRITL GALVIAIETGLRIIGMQTFMTYILVGVILILAVIIDQVFPNRNR\*

>SPBIB\_v1\_210011|ID:27162903| putative Ribose transport system permease protein RbsC [Uncultured spirochete bib]  
LAAESTSNGERLKGAPGGGGFFQTAIGRFSARNWALIFLFIMIVIFSLGSSGFFDIVNF  
QNIHLSGTGAFLAAAEELLVITGGIDLSIGYVYGLSSVLGAKVMQILYAGGAGGAGSMP  
VWQVIALGCLAALSVSILPGLANGVLVTRFRVPPFIATMGMWGICNGITLFLADGFMPVM  
GAPSEINAIGNSYFLYIDPSKISFFAKPSYITQANIRSVLRLVPNSLFLSLAVLLVLGF  
VLGRTRFGKHTYAIGGSM DAIRSGINVRHLVMIYVIASFSVSGVAGLFLNFQTGIGNYT  
PSGANYELMAVA AVVIGGASLTGGKGRILGTA VGVVLVLA VLENGLQIIGVSAFYRYIGV  
VLLTIAVIIDRAFPDLF\*

>SPBIB\_v1\_210012|ID:27162904| putative amino acid ABC transporter, substrate-binding protein [Uncultured spirochete bib]

MKKRYSAVFAILLILLTVAPVFGQAACKQLTFLFMPGVQDPFYTTMEKGVRAKCKELGVN  
LIVAEYPKAWGPEYQVPILQAYAQRGGFDGLLIAPTSVDALKAPLKAIYDKGVEIITVDT  
FLGDGDYSKPNTDYNFPLSYIGSDNYLGGKMIAEHLAKLVGEKKGKVFCEATNPDASSVAA  
RVKGF RDGIAQFPNMKLVGVVEWCLDVQQAQEQTLAALQKDKDIVGIFGTNVFSAQGANQ  
AVVNAGLVGAIKIASWDATITNIENLKKGVIDLVLAQKPGEMGSLGVEWLYKYLTQKVQV  
PKKVIPGFEFFTKDNVNDPNMQQYIYQ\*

>SPBIB\_v1\_210013|ID:27162905| PilT protein domain protein [Uncultured spirochete bib]  
MLNSILIDTGPLIALFDKDDTYHNKVKDFIKNAKYRFITTA VITEVSHMLDFNINAQID  
FFEWIMKEGVILQEISQKDISRIIELTKEYSDRPMDFADATLVIAAEKTGIKKIISIDS  
FDIYRLPGKVKIENVFHLDFHFRGSFE\*

>SPBIB\_v1\_210014|ID:27162906| CopG-like domain-containing protein DNA-binding [Uncultured spirochete bib]  
MTTVRLPIEIEQRLEILAQKKHKSKTDLIREALEKLFIQEESKDSYELGEEYFGKYGSG

DGSLSTITYKDKLKDKINAKLNSH\*

>SPBIB\_v1\_210015|ID:27162907| protein of unknown function [Uncultured spirochete bib]

VYAEDSGWGPSRGRNFVQVPAGVGFIEVREGQSQTGIELSDLRFVGEF\*

>SPBIB\_v1\_210016|ID:27162908| conserved protein of unknown function [Uncultured spirochete bib]

MIYRACEPYLRKIASQFPVVLITGPRQSGKTTLARYAFDPYSYVSLENLDTADRAREDPR  
GFLAQYRLKVIFDEIQRPLSLLSYLQQIVDEHPQPGSFIITGSQQFNLMAAATQSLAGRI  
GRLELLPFSTGEIYSYNPSLLTDSTTSIRRGWYPPIDRSLDADLWYENYIATYLERDVR  
QIDNIRDLLTFRRLSLCAGRTAQLVNLSELAGECGVSHNTIKAWLSVLEASYLVKLVQP  
YYRNFNKRIVKTPKLYFLDTGLAARLLGIRTDDQLANHPLRGALFETYVFSSELLKKRMNG  
QAPWEIYFWRDHGGIEVDFILESGGTLIAVEVKSGATFHPDFTTNLSRFAGFAGSDLTHA  
ALIYGGMEAFTFKDVSVPWNQMDLL\*

>SPBIB\_v1\_210017|ID:27162909| protein of unknown function [Uncultured spirochete bib]

VKTGEVLGRGTTPDFGVDFDRTKPNAFIRPSRYEPLMRYAQPPFGYLKEDISSRMLSLISR  
TGEPKGGSFVYDQEGRLIGNWFAVPDAKLHEMSWDDMLAFAPHYLDTRRIEMGFSGRLWS  
AFTSASPST\*

>SPBIB\_v1\_210018|ID:27162910| Major facilitator superfamily MFS\_1 [Uncultured spirochete bib]

MSERAPAHWFVAMATLLMICLGTVYAWSYFQTPIMKAYGWNTTQVSLIFSFTILFLGV  
AAAIGGVVLPVGPRLALSILSLGYAVAALALSISLALLYIGYGFIGGTGLGLGY  
VTPVTIAKWFPDRKGLATGIVVMGFVGFALVMSKVLAPLLSLTGSNLVTTFLFAVLF  
FAITMTSSSFLRTPPPDWKSGASPSKTDSVGNAPSAMLSQFPRTAANVPSPLEAFRAAKG  
DILSARLLLWLMFFCNISAGITVVGFGQSPMFQKLLAQSNPALTSVALAAMGATLIAVTS  
IFNGVGRFFWGAVSDRVGRIATFRIMLGSELVIFILLIITHQPILFAALLCWVLLCYGGG  
FGIMPASVAELFHPNKMTVIYGAALTAWAAGGVVGPQITAFIQDSVPERASTLSFIVGAC  
FVALGFALSLIIQIRAKKSGRRA\*

>SPBIB\_v1\_210019|ID:27162911| protein of unknown function [Uncultured spirochete bib]

MQYIAFDCHKRYTYAVVEDQDKGRVMEQRIHRKGEIREFLSRHEPGSPVALETIGSWYW  
IVDEIEAAGMLPRLVNARKAKMMLASSKKTDRDLAKGLNTLQRAGTLPTVWIPPGAVRDI  
RELFRTRMVLTREVTURLKNRILSCFSKYGISFNDDTSDAFNVKGRASLESALSLLPSHTCF  
AVQNLLGQLDAVKHSIKEFEARINQVKNIAPR\*

>SPBIB\_v1\_210020|ID:27162912| protein of unknown function [Uncultured spirochete bib]

MRHEALHFRHVQLYERLTKATKGGHVAIGAVARHLAEATYVWLTTKSAYREPNTKCSSTV  
VSSRKG\*

>SPBIB\_v1\_210021|ID:27162913| conserved protein of unknown function [Uncultured spirochete bib]

MSSKAMSLKGRINHYAKKNIAAQVVLQNYMFERFLERLSKSEYQEKFVIKGGMLVAAIV  
GLDTRSTMDLDTTLRNLPLTEEQITQAIQSICGIDLKDEVAFKVSVASIRKDDRYGGFC  
IRMDAVYDTIVTPLSIDISTGDVITPSAVLYEFSSIFDESVRIRLWGYNIETVMAEKVET  
ILSRGIFSTRPRDYDIYILGTTQKYDKALFLEALSATAEHRGSKAILSAPAEIFENISE  
SRDLRQMWAYKYQKKFPYAQDVTYEAIIIEVLRSLLFQ\*

>SPBIB\_v1\_210022|ID:27162914| putative abortive infection protein AbiGI [Uncultured spirochete bib]

MGINSEILQEMKKNNVITTSQVLQLGYSKALLTKYVKAGLLERSGHGVYILPDAVNDDM  
YALMLRSSKIIFSDHTALFLNGLSERTPFRHTVTIPSDSALPASIKDECTCFYIKPELHR  
LGMIEKKTTFGNTVRCYNMERTICDFLRSRNRCDDETVISAVKNYAVSKGKNLNLLEDYA  
KRLRVEKVLKRYMEVLL\*

>SPBIB\_v1\_210023|ID:27162915| Phosphonate-transporting ATPase [Uncultured spirochete bib]

MISVHDILVSFSLGGGAEHTVLRNLTLEVKRGQTVSIIIGSNGAGKSTLLNAIAGTVPLQA  
GKILFDGQDVTPLPEWERAHVGRVVRQDPLAGTAGDMTVLDNLALAARKGPRRFRIATPP  
KFAREMAERVAELGMGLENRLHENVSRLSGGQRQALTLMAVLSRPSVLLLDEHTAALDP  
ANAEIVGELTRRFIEEFQLTALIVTHDMKRALDQASRVMMHEGSIIADLSGPEKDRMDV  
PGLVRLFKQARGAEYAEDRDLLS\*

>SPBIB\_v1\_210024|ID:27162916| ABC-type transporter, integral membrane subunit [Uncultured spirochete bib]

MIEGILVEGLIYSILALGVFVSFRVLDLDFPDLTVEGSFPAGAAAGAVVAQAASASPLPLVH  
ALAVPAGLLAGFIAGGLAGFVTAGVHHRLKVPPLLAGIVTMTGFYSINLRILGGKPNLPL  
ITNNPMLAQARSFLSLLSPEGALLASCVLVCLVLFGLLDLFFHTEIGIAMGALGDNENA  
VIQAGIQPNRLRTWGIMLANALPGLSGAMAAAYQGFADVNLGQGVVAAGLATVMLGELVV

HSQFIDVQLARVFLGSIIFRALMYAARSWGYYVAGITPNDLRLLTALLIIASVAISRYGRK  
KR\*

>SPBIB\_v1\_210025|ID:27162917| ABC transporter substrate binding protein [Uncultured spirochete bib]  
MRRTRMFFVALAIIGMVLLSCAPKNAKVIGVAKFVSHPALDAIEKGIVDELSSKSKSDYKI  
DLQANADMNTAAQIAQRFKQEKVALAVGIATPTAQALANQIKDRPVIYSAVTPVVSAGL  
VSSWDKGGANITGTSMDTPVREQLDLLRSLKDVKRVGNIYSSGEANSVAIAAIVKQYCQE  
NGLEYVESTITNSSEARQAILSIANRIDGLYLGNDNTVFSALSGIAEVALEKKIPVVTAD  
PSSAETIPVLAALGYDYRMYMGVATGKIVVRVLNGEKTADIPALLPKDSEDMSFVLNLDTA  
KKIGISVPQAVVDKAKVIISDGQVTRK\*

>SPBIB\_v1\_210026|ID:27162918|braC| Leucine-, isoleucine-, valine-, threonine-, and alanine-binding protein  
[Uncultured spirochete bib]  
MKRTYMLLAVFALAGLMVFSGAQNAFAAPTIKIGVAGAHTGDLASYGLPSVNAAKLVVKN  
INDKGGINGQKVELVIEDDQCKPELATNAAAKLVSAKVAVVIGHICSGATKAALGIYKDS  
KIVTISPSATNPPLTQSGEYPNFFRTIAPDDAQAKLAATFLAKTLKLLKIAVLHDKGDYG  
KGAELVKQYAEYGVQVPLFEGINPGAPDYSAVVNKISNAKVDGVDVWGGYHPEASKLVQ  
QMKDKGMNIPFISDDGVDNTFIEVAGKYAEGVYATGPTDTSTNALAIKAIEEHKKTFTGT  
EPGAFFLNAYAATQALLNAIEKAGSTDYNKIVAALKSNYVDTPLGHISFDQKGDIIIGFGF  
SVYQVKNGVFVELK\*

>SPBIB\_v1\_210027|ID:27162919|livH| leucine/isoleucine/valine transporter subunit ; membrane component of ABC  
superfamily [Uncultured spirochete bib]  
MEYFLKFLSGTAKGSIYALIALGYTMVYGIQLINFAHGEIYMIGGFTALILGGFFFSN  
GMPVWLVLFSVLLSIYASAFGYTIEKIA YRPLRGKPRLSALISAIGVSIVLQNFVLLA  
QTEKFMPPSYLPEFSWLQPYKEYINSTQLIILGVTAIMVFLTLIKFTRIGKAMRATA  
QDMHMAQLVGVDVNQVISVTFIIGSSLAAIGGVLCISYMGQINYYIGFVAGIKAFVA AVL  
GGIGSIPGAVLGSFILGWTESLGTGYISSDYEDAFVILIVILLIKPDGILGRTQRQKV  
\*

>SPBIB\_v1\_210028|ID:27162920| ABC-type transporter, integral membrane subunit [Uncultured spirochete bib]  
MKSRSLLADIGKSFLIAIWFMVLLFPLMVMKVNVSKGVAQVQFRWNMLPLVGIAAFVLSL  
LWRFALEWNEKRGNDSTRAGGPLAKLKALTSQYLGIAAVRKGALFILLAFALAYPFLFGMY  
HTNVMITAFIYIILALGLNIVVGLGLLNLGYAAFFGVGAYTYGLLWKYVGHFSIAAGID  
PGWLFWISLPLAGIATLFGILLSPLVRLRGDYLAITLAFGEIFRMVMQNSGDITGGA  
TGISLIPRPWLFNIKLTPQKAATYIYFIAIVLVLITIFVRRIEDSKVGRALEAMREDEI  
ACQAMGINLVRNKLITFALGAFWAGIAGVMAAQTTYINPDSFTLWESIILMAVVIGGT  
GSIPGAIGGAILLKLPEYFRALAQYRMLIYGIAMILVIIFKPDGLIPRKRKQYTFKEKE  
LAK\*

>SPBIB\_v1\_210029|ID:27162921|livG| leucine/isoleucine/valine transporter subunit ; ATP-binding component of ABC  
superfamily [Uncultured spirochete bib]  
MSTQQLQSKQSILEIENLSMAFGGLRAIDGVSMHIDEGEIAALIGPNGAGKTTIFNCITG  
VYKPTTEGTVSIRNKNQIEHGHGLKPDIIHNHGLARTFQNIRLFNNMTVLENVMIGRHNS  
LKAGIFKAIVRDSSTKEEQRVIEESYLILKLLKLDMYINETAGNLPYGEQRRLEIARAL  
ATDPFLLLLDEPVAGMNAQETKELEETINIIRDQEHITILLIEHDMSLVMNVSERIYVLD  
YGRLLAEGTPHEIKRNPDIKAYLGE\*

>SPBIB\_v1\_210030|ID:27162922|livF| leucine/isoleucine/valine transporter subunit ; ATP-binding component of ABC  
superfamily [Uncultured spirochete bib]  
MALLELKNVSTFYGNHALKSISISVEEGEIVTLIGANGAGKTTTLMSICGITPVRSGEI  
LLKGQNTKVS PNKIVQMGVSQVPEGRRIFFQLTVSENLDMGAFRRDKEGIKRDMEEVF  
SIFPRLAERRNQLGGTSLSGGEQQLAISRALMANPHLLLDEPSLGLAPLIVQSIFEI IQ  
RINKERKTTILLVEQNANMALKIASKGYVLQNGVIKMADTAAHLENEEVRKAYLGL\*

>SPBIB\_v1\_210031|ID:27162923| putative signal transduction protein with CBS domains [Uncultured spirochete bib]  
MKVGQRMTRNPITITPDVTVPEAQAIMRREKIKRLPVLDNKGKLVGIVTTLDLIHASPS  
ATSLDIYELHYLLSKLKVEMTRNVITVDEDLPIEEAARIMADNGISGLPVMRGNVLIG  
IITETDLFKLFIELFGARHKGIRLTLLPEKKGELAKVSNATKAGGNIVSFATFEGEDP  
TNA YCAVKVTGVEKDALIQALTPVVEKVVDARET\*

>SPBIB\_v1\_210032|ID:27162924| Resolvase domain-containing protein (fragment) [Uncultured spirochete bib]

MRIGYARPSVLQPDAELQVKALQDAGAEEKIYTENVLSNEADRPAFEEALGSLGAGDTLIV  
ASLDRLARTTTTELFYIIIEIIRGAAAFASLKEALDTSADDGEAGRVFLRTLGAITEFERA  
ILKEWQRESIEAAKTRRGHESKSGRRRR\*

>SPBIB\_v1\_210033|ID:27162925| putative transcriptional regulator [Uncultured spirochete bib]  
MELSELFKALSDPTRLLILRLMIEEQQLCVCEIVTILGIPQYQVSRHLSVLKQADLVQF  
QKIGTWAYHYFNDSTPINQMLAELLRKAMPVEKYQTEFNRLRDLRALRFNGKCVVGFEEE  
KGTAGIKKPARKS\*

>SPBIB\_v1\_210034|ID:27162926|arsB| Arsenite resistance protein ArsB [Uncultured spirochete bib]  
MEGAKKLSFVDRYLTLWIFLAIGAGIAIGYFWPGFGQFISAMSIGTTTPIAIGLILMMY  
PPLAKVKYEKMGQVFNKLLALALIQNWLVGPLVMFGLAVIFLRAHPEYMIGVILVGLA  
RCIAMVIVWNDLAGGDRELGVGLVAFNAIAQVLFYAVYIWFLLTVLLNMFGLANGIQINI  
SMWESAKTVLIYLGIFFSGMGTRYILQKIKGSEWYETKFIPKISPLTLIALLLFTIVVMF  
SLKGEFIVKQPLDVLIVAIPLVLYFVLMWFVTFFIGKAMGANRQTISLAFTAGSNDFEL  
AIAVAIGIFGISSGEAFATVIGPLVEVPVMILLVNAAIKMKGLFKQKPSFEV\*

>SPBIB\_v1\_210035|ID:27162927| putative OsmC family protein [Uncultured spirochete bib]  
MNEHPQSKKYEISLSRENGKIALASAHGSTLRMSLVGTEPELGFTPPETVIAAYGACIMS  
NINKVAQAESLKIDDIRIDFTAQKRNDPLGLEHHCIAVKSSAPKEKLQQLLTKATTDG  
TATNALQEGLKADFQFEV\*

>SPBIB\_v1\_210036|ID:27162928| protein of unknown function [Uncultured spirochete bib]  
MEKIKQNSAGDASLGVLDRIQPLLLVAAIAIGLLLASIMPAFARRLEPSAT\*

>SPBIB\_v1\_210037|ID:27162929| protein of unknown function [Uncultured spirochete bib]  
MSDTIRVRVIAPPAAPNACGDTWEHAVQLIETRISARYPGTVTFEFVPLFSKAFFDMPLV  
VQALGDGTAQMPVILVGDRIIQSGGKISESKIRAEIEGILHGKDQTEQRG\*

>SPBIB\_v1\_210038|ID:27162930| protein of unknown function [Uncultured spirochete bib]  
MEARLQQAADRISTLGNPKVSTFRNANDFFNDSELAALRKRYNENLIARKKQYDGT  
LTQEELNTIRTLQAQVSNHPITQRFVQARAELVDVLTECNLSAISELLGFNYAQAAPPAN  
CG\*

>SPBIB\_v1\_210039|ID:27162931| conserved protein of unknown function [Uncultured spirochete bib]  
MTDIMLEAESYVQASRLAKAIAATGNYAIFEKARDRLSTDAEARNMLKQLEAAEQKAQL  
SASWGGLSDHERRKLERMQQETFKQPTILAFLEAQKSLIAELQELNRYMTEKLGIDLADM  
TKPQTGCCG\*

>SPBIB\_v1\_210040|ID:27162932|arsA| putative arsenical pump-driving ATPase [Uncultured spirochete bib]  
MKAQYIFFSGKGGVGGKTTMACATAVHYAESGKKTLIITTDASNLDVFEFESRIGHKITPL  
GIENLWGMEIDPKATEEYRERILAPMRAVMPVSVMKVMEEQFNSPCTTEIASFDRFVDF  
MVMEQSENEIPYDVIIIFDTAPTGHTRILLELSVDWSKHIEESAKGGGNTCIGPVASIQEN  
KKKYDEATRLLGDPSTRDFVFLQPEGTSLYETKRSKAELEGIGVKSIVRLIVNGILPQEV  
CTHPFFRSRYEMQQKYLQIRQDFKESITYMRQRDGEIKGIESLRAIARDLFSKDRTTSS  
YRLSTSFETPTQGGLVQAASLFDLINPTPGKTKAVFFTGKGGVGGKTTVSTAVAYGLGQKG  
YKTLTLLTDPASHIGQVLQQS VGSSISKIEGAENLWATMIDQKQAAEYKARIADAEEK  
YSPDTLAAVREELESPCTEEMAAFDKFMGYVESDEFDVFVIFDTAPTGHTRLIELPFDYE  
DQVGMMVATTAESASVKSETQHRFEKIIARMKDPEHSLFAFVVPESTPVVEAYRAMLDL  
KDAGIETKFVVANQVLP AEICTNEFFMKRRAMQVKYLAEIETLFFKPKITIMPLLDTEITG  
LPMVAEASELLLAERKTESA\*

>SPBIB\_v1\_210041|ID:27162933| Arsenical resistance operon trans-acting repressor ArsD [Uncultured spirochete bib]  
MPAKIELFDPPMCCPGGLCGPAIDPVLLDLNEAILRLKKEKGIAVERYLLSQGKFMEN  
PEVLALLQHQGTEILPATAVNGHVVKTKNFPTYEELKQWASEPAPITQGASA\*

>SPBIB\_v1\_210042|ID:27162934| conserved protein of unknown function [Uncultured spirochete bib]  
MKDKDMVDEYDFDKSIKNPYIKNLKKSVTIRLEPDTVNYFKSLSRDIGIPYQTLINLYLT  
QCAKEKKKPEVVWQ\*

>SPBIB\_v1\_210043|ID:27162935| Oxidoreductase, short chain dehydrogenase [Uncultured spirochete bib]  
MLRTRPCLDPAGGLPYPVDIMSWLSLGGKVVWITGASSGIGRSLAVEAARRGAWLILSGRN  
VPAL EETAALCERARLASENQNAQKDEQEASPGARNHA ACTLLPFDLADPEARLEAAQK  
ALTIHGRIDVLM LNAGVSQRAK FVETSADVFN LIMETNFFAAVDIVRAVLPQMCSHSSGV  
IACVSSVAGLMGAPWRTAYSASKHAQAGFFSSLRTELYGSGIQISIVYPGFVRTAISENA

LAGDGTRHGKLDPLQKFGQNPEVTARTIWDKLETGKLDIKVAFELKARLGVFLSRYFPAL  
FVRSISRHGGL\*

>SPBIB\_v1\_210044|ID:27162936| putative type I restriction enzyme HindVIIP M protein [Uncultured spirochete bib]  
VARQKRNAQEAEVSGATIGYEAQLWKMADALRGSMDAAEYKHVVLGLIFLKYISDAFEEH  
HATLQAERAQGADPEDPDEYRAVNVFWVPPEARWAHLRAQAKOPTIGQLVDDAMAAIERD  
NPALKGVLPKDYARPALDKQRLGQLIDLISNIKVGDEAARSKDVLGRVYEFYFLSQFASAE  
GKKGGFEFYTPRCIVKLLVEMLEPYRGRVYDPCCGSSGMFVQSVEFIRAHANGNGNGGKAR  
ADISIYGQELNYTTWRLAEMNLAIRGIEGQIAQGDTFHNDRFPDLKADFILANPPFNVS  
WGGERLAGDKRWQYGVPPKSNANFAWVQHIVYHLSPTGVAGFVLANGSMSSNQSGEGER  
KNLIEANLVDCMVALPGQLFYSTQIPACLWFLARDRQDGRFRDRRGEILFIDARKLGRMV  
DRTHRELTDKDIKKIADTYHAWRGEKECGQYADVPGFCKSAPLDEVRTHGYYVLTTPGRYVG  
AEAQEDDDEPFEEKMQRLVAQWREQQAEAAKLDAIAANLKLGYGE\*

>SPBIB\_v1\_210045|ID:27162937| conserved protein of unknown function [Uncultured spirochete bib]  
MANKSRKPEQNARVPEQTEARRLDAGIAGDLPADYATLLTELKQRIREERVRVLAANAA  
MVLlyWDIGRTILQRQAQEGWGAKVIDRLSADLRREFTDMQGLSPRNLYMRAFAAAWPD  
RHIVQEVLAQITWYHNIALLDKLDAPEVRLWYARKAHEEGWSRNILVLQIERRLHERQGK  
AITNFAATLPPADSDMAAQIFKDPYLFDFLTADPRRERELEQSLIDHIQRFLLELGGAF  
AFVGRQVLLLEVGDREFFVDLLFYHLKLRVYVVELKAGPFDPAYVGMNLYLSAVDDLRL  
HPDDKPTIGLLLCKGKDRLVVEYALRDVTKPIGIAEWETRLMATLPEELKRSLPTVEELE  
AELENVAHKTQEEGYGG\*

>SPBIB\_v1\_210046|ID:27162939| protein of unknown function [Uncultured spirochete bib]  
MGGEVRPFGQLFVEPTRNGLTRPKTVRGNVVKMVMNMGELFAYPRLCNAPMERVPLRPSEY  
ERFLLKEGDLLFARQSLVLEGAGKCSIFLGDDEAVTFESHITRVRDPTKANPCFYFYF  
QSHHGAAIRSIVEQGAGASGIRGSDLESVDVQWCPLPEQRTIANILGTLDKIDLNRRM  
SETLEQMARALFKSWFVDFDPVRAKMDGRWRRGESLPLPDLYDLFPNRLVDESELGEIP  
EGWEVKPIGDLADVVGSTPKTERSEYWEGGTHHWVTPKDLGLSMPVLLDTERKITDAG  
LAQISSGLPEGTVLLSSRAPIGYLAIAEIPVAVNQGFAMKPRRDMSNFLLRWARSAH  
EDIVSQANGSTFLEISKSSFRAIRTVAPAASVMDAFDRISRSMYRKVVEHERESRTLAVL  
RDLLPKLISGELRVKDAEKFLKERGL\*

>SPBIB\_v1\_210047|ID:27162938| protein of unknown function [Uncultured spirochete bib]  
VVRLKIVKVEAGVGFSSRIKPDTGYV\*

>SPBIB\_v1\_210048|ID:27162940| conserved protein of unknown function [Uncultured spirochete bib]  
MSEDNANEIDRFEIGGENLLSKVSMGFFQTSNDTLPLGTETLPREELDDIRVRIGTLLKT  
ETVSFLLGAGASVDCGGQLIGLVPLAVERDLHRKDTAGTTEAQAQWLKVFYLAVSHSGG  
GDTPVSEDEIRSQQKLEGKEVKSLLANFEQVLATLHRWRSALPSTGGRLRVSTSTVT  
LDANAEDLDECLRRATRALAIACNLPTEDKEGGISTYKAFIRKLLTRPLNLKRVNIFTLN  
YDTLVEQASDADGVLLDGFVGTYRRVFRPESYEQDLYFPAETTEGRVHRFDRVLHLYKL  
HGSITWRATKPSINNPYGIESERFNLNDTQPVLIIYPTPAKYGETLGMPYAELFRRFAAAV  
VRPQSVLFVIGYGFGEHVNAIIRQALAVPSFTIVIVDPAPNSDFVKALRKQNDPRVWIS  
EGSRIGTFEGFVKEVLPDLREEEILKKVVATHQSLSKKENTGRGDMSDDN\*

>SPBIB\_v1\_210049|ID:27162941| ATPase-like [Uncultured spirochete bib]  
MTTDFEIGRVVAVDTAQVTIELNSDLKGMRSRSTYEGPHEVGRINSYVIIPVGARRLVAMV  
TRVVLVEEAEMKADRTMVTLPAAARLMKATLIGTIDGDKFRQGVSLFPVLDNPVYLAGRA  
DLDAIFGPIESKQTPPNMDEPGYCIPIGESAVVQGRPIRIDPDVFFGKHAAILGSTGSG  
KSCTIASLIQSIRKQPTVKRTTFVILDTNGEYRSFQRQKKGDTWEDIGSRKVLVYPSDP  
SKAAERLVIPYWFMAEDFVRIFQASKGVQRPVLLSLRLARNEAGSASPLATLREELIL  
ELNRIWLSLGGDEKTSKDVRDLAKGLKTRIEQEDLSQGWTDASTEFSLNKDEVAKALDNV  
IKTADNNIDNGTYPKVLPAADARKQIRDAIDPIYQNLGTGTHIGDSTNVAGRSADAPSYFDK  
LKFRSRHLEQVLRREESGGARARDYTGTMLLRIDRLLADTRFDFMFGPVDGVLPNPVHAL  
ASFLRDTLIGISLQNGDLSKVEDIPTGRLPFYDRQRNNEGPDVVDVILDLSLLAAEVLNV  
TALIGRLILEFLQRLGEYGGEEARGSLPVILVLEEAQNYIQPRSAEDESISR VFERIA  
REGKRYGLSLVVASQRPELSKTVLSQCSSFIVHRLQNPEDLRYFKEIVPAIYGPMMLDQI  
PALAPQATALVLGECVSAPALVKIRTASPVPRSRDPKFYRYWVSDNPPEVDFESICEKWE  
THNEIDAVPSKQKRNEEDNTR\*

>SPBIB\_v1\_210050|ID:27162942| putative type I restriction enzyme HindVIIP R protein [Uncultured spirochete bib]  
MNSFTESTVESAAALAWLESAGWQVAYGPDIAFGMPAAERADYGEVLPQRLRDALARLNP  
GLPAEALEDAFRKLTRPEGADLIQRNRALHRLLEIEGVNVEYREPDGSIRGAQAHVISFDF  
PLANDLLAVNQFTLIENKHERRPDIVLFVNGPLAVIELKNAASENATIWTAFHQLQTYK  
TEIPSIFLTNAVMIIVSDGLEARVGTLSAGREWFKPWRTISGEALADARLPELQVMIQGLL  
APHRLALVQNFIVFEDDGSRIKKMAGYHQFHAVQAAVQETLRAAGLGQLEYVNDRSGG  
RYMAGPNHAGKRGDRRVGVVWHTQSGSKSLTMVIFYAGRIIREPAMANPTLVVLTDRNDLD  
DQLFRFTSRCQDLLRQPPLQAESRAHLRKLSSVDAGGVVFTTIHKFFPEEKGDYRYPVLS  
RRNIVVIADAEHRSQYDFIDGYARHMRDALPHASFIGFTGTPIEKADANTRAVFGDYISI  
YDIQRAVEDGATVPIYYESRLAKLALNEAERP KIDEDFEEVTEGEEVERKEKLKTKWAQL  
EAIVGAEKRLRLVAQDIVTHFEQRLEAMDGKAMVVCMSRRICVELYREIVSLRPEWASEA  
DEQGAIKVVMTGASDPIDWQCHIRNKKRREALADRFRDPADPFKLIVRDMWLTGFDCP  
SLHTMYIDKPMRGHGLMQAIARVNRVFKDKPGGLVVDYLGLAHELKAALATYTESGGTGS  
TAINLDEAIAVMREKYEICCGLFHGFDRSTWTTGTPAERLGLLPSALEHLLAQENKRF  
LHAVRELSQAFALAVPHEEALAIRDDVSFFQTVQTALSKRVPGDTKPEEELDHAVRQIIS  
RAIAPEGVVDIFAVAGLEKPDLSILSDEF LAEVRGMPQRNLAVELLQKLLKGELATRRRK  
NLVQARSFAEMLEQTIRRYQNRAIEAAQVIEELIQLAKEMREASARGEQLGLTEDELAFY  
DALETNDSAVKVLGDETLRSIARELVNIVRNNVTIDWTLRENVRAQLRVLIKRLRKYGY  
PPDKQEKATQTVLEQAALLSAEWTA\*

>SPBIB\_v1\_210051|ID:27162943| conserved membrane protein of unknown function [Uncultured spirochete bib]  
MSDILLILFTLLFPVLLLYLKERVRFMAKWSTLIVCYIAGLALGNIGILPASASALLDTL  
SSVAVAISIPLLLFSVDIKKWKELSGKAILAFVLAALSLSLVSGLIYAFFRTKSAESANV  
AGLLVGLYTGTPNLAAIKTALNVDKNVYLAVHTSDIVLSAIYLLIVMSIAKPILKHILP  
LKNWDGNIASPENLSFTTRFSYFRKGLWKKIVSGFGLALAIVGVSLGVSMMLVPPDFQTM  
VTILLITSMALAASFVPRIRTLPMTFATGEYFLYVFAVAVGAMGNITQIFNSAGTYFIYV  
AIVLFGSFLVHAALCALFNIDVDTMLIVSTSAICSPFVGVVAVSLKARKLILPGITTGI  
IGYAVGNYLGIALAQLFKAIGG\*

>SPBIB\_v1\_210052|ID:27162944|fumI| Aminopentol aminotransferase [Uncultured spirochete bib]  
MSGEMGNPGEQSEGPSKAKQGQSRRAEKRFETSIAYFERAAKVIPGGIYGSKSPGFLVPG  
HFPYYLSHAKGSRIVDVGNEFIDYLCGYGSQIVGYGNPAVDEPALAQARKGDLLNQPH  
VMVELAERLIGLVDGMDWAVFVKNGTDATTLATSIARADTGKQIIIAEGAYHGAANWCS  
TNVFPVFTLAEQRDVRYPYNDVAALAEALFRQHREKIACVILTPYHHPTYKPPQLPTPEF  
IATVERLCHSEGAYFIMDDIRANFRLSMKGSHSFFGAHPDMITMGKALANGYPLSVLLGT  
EGLKKTASSFFITGTYWMSAVPMIAAMATLDEMERTLGGTERLAQLGRMLKEGLES LGREA  
GFSARISGPPAIPYLTDEDPDLFLNQRFCAMADRGVFMHPHNWFISLAHTEADIAQT  
LEAAKGAFALRDSRKPVTLHQSFQSGSEH\*

>SPBIB\_v1\_210053|ID:27162945| protein of unknown function [Uncultured spirochete bib]  
MNTKLSQLSSEEKAVLARLKAWLALQLAAEAVRNDEGLRQACPAAGISLKLAIKRGAGAM  
QLVVKNGIARVYVSGWPQLVLFPPGSASAIRVLSGSKGTAVPLPLRPGAFKALGFFRKAS  
SRATELLRGAETPEDVRARLLLAATLYGLEAVAGDTYLARRMQIIPDGVVAVRAGEIEYF  
VEKRGNAIHVIEAQQRPDVLSFADYQSAIDVLSGKRQAVVALGSGKVRIEGLLPLVQGL  
FVVLDRLSWYLGVAL\*

>SPBIB\_v1\_210054|ID:27162946| protein of unknown function [Uncultured spirochete bib]  
LPALPGGAQGAMLASGLTNEYKVVSIERRKGRSGEVEGVAGIAARC\*

>SPBIB\_v1\_210055|ID:27162947| DNA mismatch repair protein MutS domain protein [Uncultured spirochete bib]  
MKVFLMYKDRDFDPQAPLAPQTDALMQDFDVIDILLKAMSAGDRFLYDISKSALFQSLMDE  
GTILYRQQVLDSDIRNEKIVRDIYALADEAVEAKRKNWFGVFGAYPGSILHGAVRMLEAY  
LPMLERLRVIAREKQSVFRSKGFTRFFAMIQNELNDEYVRTVSQYLKDLRFDSGVMISAK  
LGEGNELTGHALRKNPKDKNWIRRILGPKTPSYAFSIDARDEAGTRALGELRDRGINFA  
ANALAQSAHDVESFFRILKNEVGFYIACNLREKLASIGEAVCFPVPSAPKSLQLEFSGL  
YNVCLSLFSGKKS VGNDVCANGKNLAIITGVNEGKSTFLRSVGIAQLMMQAGMFVPATR  
FRADIRSGVFTHYRRKEDRDMGSGKFDEELKRMNTIVDQIKPHSLILFNESFASTNEREG  
SEIARQIVSALLES GAKVFFVTHLYTFAAQFREKANKTTILLRAERRQDGRTRFRIVEGA  
PSQRSHGEDLYYKVFEEEV\*

>SPBIB\_v1\_210056|ID:27162948| DNA mismatch repair protein MutS domain protein [Uncultured spirochete bib]  
MIAVSMFLFENPEDTRRASAFDMPEYFVDLNLQILEGINGGLSEYGLQHIFYQHLSNARE  
VQFRQAIMRDMKPDFLAKIKAFSSRFRRSMRRSLASLEKLYNLHHRQGWFLVAAYCES  
VESLAGTLRDAELGSVGLRSLRDYLIAYASSEFSLTKSEMEGLMQSLGEIHYSIIKLN  
TVRVKKEFENEIDYSADIDDTFSRFRQGATKSYLLKIPSSIGLNHVEAQILDCVAKLYPEI  
FASLDEFCKAHASFIDETIDTFEREIQFYISYLDYIGPLRRAGLSFCHPEIAESDKNTYA  
QGFFDLALAKKVSMTSTRVVPNDFSLQGKERMIVITGPNQGGKTTFVRAFGQLHHLAIG  
LPVPGTGVRLFLYDAIFTHFEREETIKSQRGKLDHEIIRIHNSLERATPSSIFILNEIFT  
STTVKDSLFLSRKVLEKILALDAIACVTFLEDELASMDDRIVSMVSCVDPQDPSIRTFKV  
ERRLADGLAYARSIAEKYHLTYESLKNRFARAQGGRNPREMRGNDSMARFGEALS\*

>SPBIB\_v1\_210057|ID:27162949| exported protein of unknown function [Uncultured spirochete bib]  
MRKKKALGRLLAAFFLVMCASIAFAQPQEPTLADLPSILDHMLDNHYMPSAQVGLGSFTY  
TDTQLPTPFARWFEDELRLAFAKTAKMKLFDKQVAAAMDPAIRALYGDFFGTDRADSILY  
GKYAQDDRGVLTMTLTDLSTGGLISETRYAVPASAIPSNVNVQPSVKMVQTAALSOLF  
TSSGAGGQAGSGQQGAAQDFVVTLSTDRGQAVYRDGERLTLLVTSSKDAYLKIYHVDVN  
GVAQLIWPNRFGGSGKIKAGEALKFPGPNDKFQYVLGRPYGTEYIKAVASTKPFATMEAD  
FSDLQGSAAVIAISRGLTVVSSDTTRAELVVYEILP\*

>SPBIB\_v1\_210058|ID:27162950| Major facilitator superfamily MFS\_1 [Uncultured spirochete bib]  
MSIKDRPALASRDYRLFVVGQGISVIGTWLQNTGQAWLVKLTNSPLKLGILTSVQYLP  
SLLLSLFIGPILDRYPKRSILLWTQSLFAFSAALLAAIVFSGREQYWHVLAIAAFTGLVT  
AVDWPARGSFVSEQVEDKDAVVNAIALNSTIFNIARVIGPAIGGALIAAIGIPWTFALNA  
LSYLAVIASLWAMRSGRVAYAPKSGHYRSDIREGLAYIKKRKISIGLLAIVGVITTFLLN  
FNILIPSYAKLTLGLGADRYGILMSAMGVGAMLAGILMALGGRALQPKPGFIFGAGFILS  
TAMILIGLQRNFIISAILLAACGFGMSSFATMCNTSVQIQSSAMRGRVMAAYNLVFGS  
TPFGSLYTGQISDMLGSDAGFLISGAIGLLFLLSMRLFIAPKVFSGVKSFAQLKDSEG\*

>SPBIB\_v1\_210059|ID:27162951| Phosphoglycerate kinase [Uncultured spirochete bib]  
MQGPRLKIRPVTELELHGKTVIFRPDINSPIDPTTKRIVNTNRIEKTVPPTLNMLERGAK  
VALIAHQGDTLDYQNLPLAEHAEILSRLSGHRVSYIDDVCGPAAQAAVKALSPGEAVIL  
GNLRYLAEIESTFETVVKLTAEEMTQTWLVRSLAPLADYYVNDAFAAAHRNAPSMVAFQE  
ILPTAGGIQLMEEYTALKSVMENPRRPCVYVLGGAKISDAFDMMRKVLTDGSADYILTAG  
VTGIVMHIARGVDFGPTITKFLADRALDTFIPEAKSLLKEFSSHYVLPVDFAYDANVGQG  
APSSAQAGTKPGQSTSHNSKPVRAEAPVGSPLKDRLLPDVGRQTIELFKEYIGKAGSIFV  
NGPAGMYEHEPWSGDTREIWQAIADAPGYTVIGGGDTITAAATRFDTLSKYGYVCTGGGAM  
VRFLAGKRLPLIEAMERAFERNLQAPLRR\*

>SPBIB\_v1\_210060|ID:27162952|gap| Glyceraldehyde-3-phosphate dehydrogenase [Uncultured spirochete bib]  
MAKVKVGVAGYGVIGQRLADGVALQGMELVGVADVAVTSLVRALREKGMYPYKFFLAPE  
KREEFDKAGIPVSGTLEDLVQQVDVMLDATSAGVGAKNRLLEYKYGKKAIFQGGEKNSVA  
DVFFHGYANYEKGIGAQFLKLTSCNTTGLIRAVDCIDRKVGVEKVAITIIRRVADPGDYH  
RGLTNALQIDKAPSHQALDLMTIMPHVDATGILVHTPVTHGHIITVVATPKKSVTPENVI  
EFFREHPRIRVVSIAEGFLGNASLFRYARDLGNPRGDMYEIAAWEDTVVMSGKDVMFAIN  
VPQEAUVIPENMDAVRACMRMQLDRIEATDTTNRYLIGIGKWRNPG\*

>SPBIB\_v1\_210061|ID:27162953| putative NADH oxidase [Uncultured spirochete bib]  
MSESKYVNLFKPIKIGNFVAPNRICHVPTDISSANADGSVNQRVITYHEEIAKGGTGFII  
VGASTPDKATGRPTVTCIAVDEDPLIPGLAELAEAMHRHGAKCAVQIQHPGRQSAWPRHD  
MISATDMVVDLPGSAGHEVVYAESKAKGKSIRAMSVEEIIDLIEKFAEGAWRVQQAGFDG  
VELHGAHGYLEIAQFMSPYVNRNDRFGGSFQSRMRFPLEIARIQQKCGKDFPIGIRYSG  
DEFIEGGRNLEESVKVAQVMEEAGVAWLDISAGIFELPGPTMDPMYYPQGWNTYAAEEIK  
KHVHIPVITSHSLREPDYCEKIIAEGKADMVGLSRQLIADPYWANKARASQTEEIRKICIS  
CLVGCWQESLMIKRHMRCAINPAIGDERFINFGPASKKMKLAIVGGGGPGGMEAARIATLR  
GHDVTIFEKGEELGGAILYCCTVPGKSKMRWYADWLRRQIANLGKVVYSTIPSAEQLKE  
FDVFIATGGKVEKPDIPGINSSRVFTFEDVLRCKVKGCEFVWPKDGKKAPADVGETVLIW  
GDHFGAADTAELGMEGKKIIIVTENSQFAAWMEPCHKDVFDKHLKGGQGEGLKGVFAH  
PAQVITDSTVLEIKDDGSIVLLSGKFEKSVVKADTVVLAKVVPNDSIAEEYRKAGLLVTV  
IGDAKKVRNLRNAVADAADRAFLGENAQLNANKEIIANLPTGISL\*



>SPBIB\_v1\_210062|ID:27162954| putative Transcriptional regulator [Uncultured spirochete bib]  
 MGIETFRPASRLSLSEQVSKHILAKISSGELLPGDRVVEAQICKELHVSSIPVREAIREL  
 VANHILEYVIHRGAQVREVSMTRETIDALEVKSVELEPLAANLAGLKNLRNQLKLRKYIPQ  
 MRKALEANDHVAFAQSNQEFHRHIVEAAGNAILLRLWEQLAFDIRTKPLMDYLRIADPEQ  
 LIGEHQNVDAIEEGDTKKIGYMLEIHSVHLVNHLREKMAENAEAEKHILVINKRRKQV  
 \*

>SPBIB\_v1\_210063|ID:27162955| Xylose isomerase domain-containing protein TIM barrel [Uncultured spirochete bib]  
 MKLGFVSAILPEYSFEQVIDFASENGFKCVEIMCWPKGKAERRYGGVTHIDMDLMDKQKA  
 DYIFEYISNKNVHISAVSYYPNNMDPDPQERQFYNEHLKKVIIGARMLGLHNVNTFVGRD  
 QNKNLSDSIADFRKIWPDIVKFAEDNDVRIGIESCPMYFTMDEWPGGKNLAGSPKIWREL  
 FSIIDSRYFGLNYDPSHLVWQRMNYIAPIYEFKDKIMHVHIKDAQLYQDRLDDVGALAPP  
 LEYHYPKIPGLGDIQWGWKFIASALRDIRYKGAACIEIEDYSFEDSLEDRLALRQSKAYMN  
 QFIL\*

>SPBIB\_v1\_210064|ID:27162956| putative ABC transporter permease protein y4mJ [Uncultured spirochete bib]  
 MKAQAHVSTALDSSFFSKYKLLIVAALLIIFLVLGEIIVSDFLSVGQILLTIKLSFFIA  
 LFGLCQMIVIAAGGSGLDLSVGYTATVTAVLTAKLMDGKNENIWIAILVALALGFIIGVL  
 NGFFVSYIKLPLLVVTLAMSQMIQGAINVYTAGKNITGKPSILQLIAAKTTGFVPIIIF  
 LLILLTIIVMLILNKTRIGILLYGVGANPTAAHLSGVDIKRVRFLSYVVSIGLASFIGLL  
 LLGNMGIAFKDMGSNYVMPSIAAAVVGGSVLAGGDGNYLGVVVGAIQLTLTNLLVALGW  
 GDAGKWTGFGIVLFLLLIVYVSNRRKR\*

>SPBIB\_v1\_210065|ID:27162957| putative Monosaccharide-transporting ATPase [Uncultured spirochete bib]  
 MQGKSMETKRTLDRDFTSKPEFSSLLILLVMFALTAILQKNFFEIKSIMRNINAFAPLIL  
 VTMGQAVVIISGGIDLSSGTALSLLTCVLTSMKKNDPITGLYGIIVAFIVALLIGLING  
 FGIGYLRIIPVISTFATSFIWLGIALFLRPTPGGESVSWFGVFYNFDTLKDIFGFFGTLS  
 GFLPSSLIIIIGCILWYVISKTKTGRYIYAVGGNSESAYESGINTAKTQMIVACMINSIF  
 IFLAALFFVGGQTGSGDARMGDPLTLRSIAAAVGGIALSGGRGNVYFALVGALILSFVVK  
 IIFFANIPYAYQTLVGGAIIVVAIAGSQAYISYSTKTKEIKIG\*

>SPBIB\_v1\_210066|ID:27162958| ABC-type sugar transport system, ATPase component [Uncultured spirochete bib]  
 VNILEAKNIKKNFVGGVAALSGASLTCREGRITLLGANGSGKSTLSKIIAGVYAPDDGEI  
 TYLGKKIHYKNPHEAKQQGIGMVYQNLVPELTVWQNIIVLGDERNAGYFLDDKNARERT  
 TDIVHKLLPTLDIEKKVFELTPSEMQVVEIAKAVSRKPKLLILDEPTAALEKVVQVTSLFN  
 MMKELASSGVAIIFTSRHLWEVVEICHDLTIFRNGRNVGSMDFDKDEKDVKKIIFYITGS  
 QSETSIAKTAETCGETRLSIKNSLGTILRNISFDLKKGEILGVGGLAGQGQELMLAL  
 AGNFPKIGCDARIDGKPIKLTKPSKAIRNGIVLVPGDRETEGLFSKHSVFSNLIFSIGV  
 DKKIFIIPHRKLLKKECEQIVDILALKAASLDAPVSTLSGGNQQKVVIGKWLGLEIKVLLL  
 SDPAKGIDIGAKADLYSYIVNQVRSTGMSVVLASDTKELIEYCDRLLIMYEGSIVATLG  
 TEEITEENIIRASMHVEKE\*

>SPBIB\_v1\_210067|ID:27162959| putative Periplasmic sugar binding protein-like protein [Uncultured spirochete bib]  
 MRRKGFIVCILLVLLLVGVVSLGAAPKKAPVVGISTGSSGTSWRNIMIDALQTVGKEYK  
 AAGKIADYLIVNNVTNGDATEQANIIRDFISRGVDIILVNPNSPDALNGVIKEAQAAGIL  
 VVAFDATVTAPNVLNVTLDHYA WNLKNVEYIASTLKSNAIQIYGLDGHPANNDRIRATA  
 DVLKKYPNIKLIANTTGYWDQTKAKEVAAQIIGSGKQIDAVITQDGEAYGVLSAFLDAGK  
 LPKVMFGDPGTAFKKEWKKLRDCKADFKACAQPNPPGIGGTAFRMLNLNNGKTFKPGVL  
 KDNTYFYKVGMFITDDNFEEGWALLKDKPDDYLLSEIMSQKDVDFALFQ\*

>SPBIB\_v1\_210068|ID:27162960| conserved protein of unknown function [Uncultured spirochete bib]  
 MKSSVQAKPVVESGFRNAVALGNGIFRVLVDAEGGMPELSRKCCGDTFINAHWLPWFRGM  
 APSPEAGNLQSHELFQKIPLLERIAGNFPCVPSFGSDPVDGVEIPPHGWTANEQWQLES  
 AGTDENKRYAWARFQMTSPSDRMKLEFEKTDLVFADES VHYSILRIKNSLTKDIEINAAW  
 HNTIGFPFLTKNCKISASAKNFSTPPKGSEFDMTGRLAIGSKFTDLDRAPLRDGGTVDLA  
 IVPDMIGYTD FITGAVPKEAKLGWSACVNSELSLAYITWFMGPDTVQTDEIGLCFNNFWM  
 QYGGRPYAPWAMYEGAPDQTFCLGMENSIGAWANGLADSIKHELLGRPTTLKLSCEGQK  
 TLLYATGLFDLGSEALDEPVKHIEPTSAGLRLEFNHVAISVKADGSLERLRSIARSND CF  
 A\*

>SPBIB\_v1\_210069|ID:27162961| putative dipeptidase YkvY [Uncultured spirochete bib]

MCRLPENVLMLSGHWPLCGDAVLVFP AEGNMVCIVPETQVEEVSAEIWDAQILAYAHGRH  
DSPDQEREIERCLIDLANKNSWKTIGYEGTFEGIAAPGNVAEPRVPSKRFEQLLKSATSK  
ATFIDAQELLDLLRKTKTAWIEKIRLANEIANIGFEVFFEMVDAGRS AIELAAAVEQAI  
MVKGTGYKKARRVRAFAQVAVGKDETLAGWRPFVTTNRKLQKGELAILAVVADGYWA  
DRTRVRVAGSASPELQRLSDIVKQAQDAAISAIYPGVCASKIDKQARGIISKNGLENEFV  
HITGHGVGFRYHEGYPI LAPGSSQALLPNAIVTVEPGVYLPDFGGIRIEDDIVVTSEGE  
ILAPFSRQLS\*

>SPBIB\_v1\_210070|ID:27162962|gdh| Glucose 1-dehydrogenase [Uncultured spirochete bib]  
MSAEQYSPNEAPKRKIYEV LKQGKALVTGASKGLGAGIAAALAEAGCDVLVNYASDRKG  
AEETA AVVEKFGRKAHIFKADVSKEEEVLAMFGEMKRIFGRIDILINNSGIQVNAPFHEM  
TLDQWNKVIGINLTGQFLCAREAVKAFMKQGINPEISCSMGKILHISSVHDVIPWAGHVN  
YAAAKGGIMLLMK SIAQEVASLKIRVNSLSPGAIRTPMNV EKLVSPEEYKRILLDHIPVK  
RIGEPEDVGRAAVWLVSDDSDYVHGATLYIDGGMTLYPEFASGG\*

>SPBIB\_v1\_210071|ID:27162963| Uncharacterized oxidoreductase HI\_0048 [Uncultured spirochete bib]  
MLENLSSLFSLKERVAVITGGGGDL CGTMSRALS IAGCKVAVLDILLSKAEAVAEAIRAE  
GGIAQAYACDVLDEASLKSAYEAICSSLGVPDILINGAGGNNPKGSTKA EFLDPEKLDDP  
ESSNFFDLDFDGV RKTDFDLNFLGTFLPTKVFSRGMVEKGGK GAILNISSMGAFNPLTQVGA  
YSAAKAAVANFTKWLA VHFARTGVRVNALAPGFFMTEQLRFLHIDQKTGEPTPRSRKVIS  
HTPMGRYGNPEDLLGAVIYLLSDSASFVTGAVLPIDGGFSSYSI\*

>SPBIB\_v1\_210072|ID:27162964| Xylose isomerase domain-containing protein TIM barrel [Uncultured spirochete bib]  
MISLGFVSAILGDKTFEEV VDFASANKFACVEMMCWPVGKAERRYAGVTHIDVDRLDDAK  
VAYIKNYLSQKKVFISGLGYPNPLDEDETKRGVYIEHIKKVIHGAARLGPV VNTFIGR  
IPLKDPEYNFSLFKEIWPDIVKYAETQGVKIGIENCPMYFSKDEWPSGKNLAYS PAHFRK  
IFEIIPSKNFGLNYDPSHFVWQQMDYLKPIKEFKNRLFHIHIKDVKVDKDR LDDVGILAT  
PLEYHSPRLPGLGDVDWSKFFSVLVESGYRGPACIEVEDRNYEKFPE DVRTALLQSRNYV  
SQFLVLE\*

>SPBIB\_v1\_210073|ID:27162965| Oxidoreductase domain protein [Uncultured spirochete bib]  
MKELNVGIIGLGFIPVHLQALRKIPHLNVVAIADKAGSSIKEKVEALGVEK WYENYEDL  
LARKDVDAVHICSPNHLHAEMAKKALLAGKHVVCEKPLAVSSAQAKELVELATQKNLVNA  
VHFNIRYYPLIRHLRTMVQKGDIGRIFSIQGSYLQDWLFYETDYNWRLESKLSGESRAVA  
DIGSHWMDLIEYV SGLKIKQVFADFATIHPIRKKPLKPVETFAGKMLKPEDYSDVPIDTE  
DYATILFRFENGERGVLTVS QVSAGRKNRLYFELDGSRQSAVWDSEVPNQMWFGHRDGP  
EIIIMKDP SLVYPESRKLITLPGGHQEGFNDTPFQLFSEFYEDVRNGKPS EKPSYPTFKDG  
LRELVLCEHILKSNRSGSWVTVE\*

>SPBIB\_v1\_210074|ID:27162966|xylA| D-xylose isomerase [Uncultured spirochete bib]  
MAEYFVGHKEYFPGIGKIRCEGPKSDNPLAFKFYNPDRKVGQKTMREHLRFAVAYWHSFG  
ADGTDPFGAATHIHPWTS DARNPMEA YEHKLDA AFEFFTKLGVDFYCFHDRDLAPEGQTP  
IESERNLAHMVSLAHERQKATGV RLLWGTANLFSHPRYMNGAATNPEFGVVAHAAAQVKA  
AIDATIELGGQGYVFWGGREGYMSLLNTNLKREKDH LARFLTMARDYGRAHGFKGTFYIE  
PKPMEPMKHQYDFD VETVAGFLRAYGLDKDFRVNIEANHAELAGHDFQHELETAALGIF  
GSVDANRGDPRNGWDTDQFPIN YD TTLAMLAILRAGGFTTGGLNFDAKIRRN SVDPADL  
FEAHIGGMDAFAAGLLAAQR IIEDGKFDAFVSQRYSSFDTGDGKR FEDGRMKFEELAA  
PAGPDVGR TSGKQERLENLIMQYVVLGVE\*

>SPBIB\_v1\_210075|ID:27162967|xylB| Xylulose kinase [Uncultured spirochete bib]  
MYSVCGIDLGTQ SCKIILYDPGAKRILAKAQAPLDIIAENNGTREQKA EWYEAALADCFA  
AIDPGLRATIAAIGVSGQQHGFVPLDAEGKAIRPVKLWNDTSTAVECAELTSSAGGQAAL  
LAETGLMLPGYTAPKILWLKKHEPQAYARLRHVLLPHDYVNFL LTSNYVTEYGDASGTA  
LFDVRVRRWSRRISDLIDPQLIDFLPSLIGPKPAGRVSAKAAQRFGIPEGALVAAGGGD  
NMMSAIGTGTVRDGF LTM SLGTSGTLYGYSDRPVVDPEGNLA AFCSSTGGWLPLLCTMNC  
TVASEQVRALLGMSIEELNARAEAAPIGA EGLVVL PFFNGERIPNLPNGRASINGATAAN  
FSKENLARAAMEAAIFGM RIGLESFRKLGFAAQEIRLAGGGAKSRLWRQIAANVTGLPVR  
VPEEEEEAAFGAAIQALWC FEQASGKKKGIEELVDEHVALRDGSTVEPEPESVARYEEAY  
ANYSKYLAALSLLYR\*

>SPBIB\_v1\_210076|ID:27162968| Transcriptional regulator, AraC family [Uncultured spirochete bib]

MKIKDAVYVYRLISGERLAWHGRYHAHARGEYEFHYFMEGQGALLINKAKYIIDGGQIYF  
VRPREFHSILPEAVEKPISYYAILFEPEAGNPVDEDIIALMGHIWRARTRALPADTKDRF  
LLDDLRLSKSPSNQSRKAAEHALLSILYRWFDHFDSPPALGSSRAKNEHVERALSIMS  
KLVREKLSDDLAAKGLGLSEEFIRLFRHHLGMSPFQYFTRLKIEAASAVLVDNQLTISD  
VAYRFGFENPFHFTKVFKKCTGLSPREYRKMFFEAGKPPSAAVAEKT\*

>SPBIB\_v1\_210077|ID:27162969| protein of unknown function [Uncultured spirochete bib]  
MNEPETTLEFAVDSLLEVLPSVWDRIRSNFRAAGTSKFGITLEQFHTLRHIYKGCCYTG  
IAEKRVSCSAVSQAVDVLVTKGLVTRAQESGDRRQFRLELTPYARRVLDENYEMENRALI  
KQKIARLSREQRAIVVQSMEILKAVFISA\*

>SPBIB\_v1\_210078|ID:27162970|yfiB| Uncharacterized ABC transporter ATP-binding protein YfiB [Uncultured spirochete bib]

MKEFKLLHYAKPYWKLALFSLVMLVAMVGFDLAVPRLVGRIIDKGIRQKDLQVVLTSSA  
VMLGLSLLSALVAVLNSISSIRVGESIARDLREAMFVKIQHFSYGNIDKFSTAKLMVRLT  
SDTAAVQRLFQMSLRIGTRAPLSMIGSIVLMFVTSKTLALAMMPILVAGGIVIVYFSVRL  
EPIFRTVQQRDLRLNTVLQENIAGAHLVKAQFVRGPYESSRFEKANKNLADENIRVMQLMS  
SMSPILTMLINTGIVLVVWLGGGQAIHGNLSLQIVAFNTNYLMATLQPLTMMTQLSNNWA  
NGLASAKRINEVLDAELEVSEAPDAVSLPEPSRGEIEFEGVSFHNGATDLAVLEEICTR  
AEPGKTTAILGATGSGKSSLVNLIPRFYDASSGRVRIDELDRRLRSDSLLEHIAVVPQD  
TVLFTGTVRDNIRYGRPNATEDEIIAAKAAQAADFIMRMPKGYDTHIEERGVNLSGGQK  
QRIAIARALVCKPSILDDATSSVDVETETQIQNAIAKAAALGTTVIMVAQRISTVLNAD  
KIIVLDQGRIVAEGTHKVLKSSPIYKEIYDSQLGAGVRHGL\*

>SPBIB\_v1\_210079|ID:27162971|yfiC| Uncharacterized ABC transporter ATP-binding protein YfiC [Uncultured spirochete bib]

MAYETTPSVQDVRASFQRRAGRPKFEKAADPRKAMVRLKYLGPFKSLLILVVGFIYLY  
SLLGLAGPYLMGRAIDKSIGGKDLHGLLVTALLMLAAFLSNFFNIANLIMARISQNAL  
KNLRGDLFAHIQTLMSRFFDTHPAGGLMSRLTNDIDAINQTVSQNIISLIASILTMIGIL  
ASMFILNHWLALASLVVIPIMYWFSNFIKYTRKGFRELQKDLGELNAVAEETVSGFKVI  
KAFFRNESAIETFRQKNNAVFKSAVYANSYAMLLMPLTGVLGSAFFVIVLASLGGWLALKE  
LVSIGMIATFINYAQNFTSPLRQLSNLYNSIQAALAGAERVFEIIDTKPETPDLPAVPA  
GRFKGEVSLRNVVFGYNPERVIIRNFSLEIPAGQTIALVGPTGAGKTTITNLLTRFYDIQ  
EGQIRIDGIDIRAIRKADLRRNLALVLQDTFLFADTILENIRFGRLDATDEECFEARMA  
EADHFIRQLPRGYHTNLSERAGNLSQGQRQLLSIARAILANPSILILDEATSSVDTRTEL  
RIQKALLRLMEGRTSIVIAHRLSTIRDADSIVVINNGEIVEQGNHEELLERRGFYHHLYM  
SQFKGNEI\*

>SPBIB\_v1\_210080|ID:27162972|crcB| putative fluoride ion transporter CrcB [Uncultured spirochete bib]  
MAMKDLLVFFGGGLGALSFRVFSRGISMRFFTAIPSGTLFVNVTGSLLMGFFFNLLNAS  
LLPAGYRALITVGFAYTTTFSTYALETVALLRKEYLPAFWNFFLNVLTFVAIVIGMV  
ISSALYSVIRSEGILHR\*

>SPBIB\_v1\_210081|ID:27162973| conserved protein of unknown function [Uncultured spirochete bib]  
MHFEEDDMLLRIRYIGESDTYKGGKPVYEQIVLKARALKLSGATVIRGEMGFGAHSMSAN  
VLSLSTDLPVVIEIVDKEENIEKLLPFLDEVLLLEGLVTKESIHVYRYQAR\*

>SPBIB\_v1\_210082|ID:27162974| conserved protein of unknown function [Uncultured spirochete bib]  
MERRDIPIDQFHYDPAQLREHWLVLCAGDFEAGAFNTMTISWGSYGQIWNKMFFQVFRP  
TRYTFEFMEKYGTFTLNAFEPKYKPAISIIGSKSGRNGNKIAEAGLTPMVS RVVAAPCFK  
EASLVIECRKMYWQDLEHAHFLDPSIEGNYPKKDYHRMYFGEIVHVSRI\*

>SPBIB\_v1\_210083|ID:27162975|ltaA| L-allo-threonine aldolase [Uncultured spirochete bib]  
MNYIDLRSDTVTWPTTEAMRKAMAQALVGDDVYGDDPTVNELERLAAEMTGKEAALFVPSG  
TFGNQLSLFTWCPRGSEVILGEQCHIIQHEAGAASVIAGVQTRPIFAPDGILPLETIEER  
IRGNDIHYPTSLICIENAHSLGRVIPLSYMKEVAQLAHAHGLPVHLDGARLFNAAVSMG  
VSAIEISSMVDSVMFCLSKGLCAPVGSMLAGSREFIEKARRRRKIMGGGMQRQVGLAAAG  
LIALKDMTRRLAEDHENAHYLAQLAWIPGIEVEKEALDINMVFFKLPAGIDGSALVRYF  
KERGVLINPPEQGWCRFVTHYWIHKEDIDKVIGLMNDICIGTL\*

>SPBIB\_v1\_210084|ID:27162976| conserved protein of unknown function [Uncultured spirochete bib]  
MANKGLLMCVCQGNCPFSFQQMNIFDVGNAIRREKLVDYVGIHPQLCSTDGDKFLSTLLKG

ESTDELYVAACDPTMQVKMFRDALESAGFSKEHIHGVDIRNMTTEQAVGSIKNMLGADKK

\*

>SPBIB\_v1\_210085|ID:27162977| putative Dinitrogenase iron-molybdenum cofactor biosynthesis protein [Uncultured spirochete bib]

MNIVVMAKGAGLGAWVDDDFAHARQIVLVKDSGGFEAAANPFASSAGAENSAKLAQFILS  
KFQDIGAIVAGAFDEDAKANLQEKEISMFIAAKGSVMELAEAARAGSLTRA\*

>SPBIB\_v1\_210086|ID:27162978| conserved membrane protein of unknown function [Uncultured spirochete bib]

MSISTIYILVAAGLLVFSFIKNREKTTKALMVAGRVALMVLPVLLFVFLMGILEVFPVPR  
EVFTSLGSGHGVLGIVLGELLGVFALIEPAAVFPFAGFLHQSGASYGAVVGVFVMSAILI  
GIVTLPLEIQQFGARFTITRNVVALLIFGLGLVFMVAL\*

>SPBIB\_v1\_210087|ID:27162979| conserved membrane protein of unknown function [Uncultured spirochete bib]

MKMTHENAASEQHKKNHKGSaelVKSaiIYVALAVVWVLGTTIITPQGGVHVAGIVYKTF  
SGVLAIIAAVFLIGLIQVWLTPEQVSKVLGKEAGWKGLLSATLPMILGGSFLVIFPLL  
KTLREKGARTSSVVAFLFAWSAKAPLLPLEIKFLGLPFAALRLVSIPVLAAILGLLAEWI  
IDKPLRDAGLEIPER\*

>SPBIB\_v1\_210088|ID:27162980| conserved protein of unknown function [Uncultured spirochete bib]

MNLLLEIQNLSLFKEGRPILNNSMIDIWDGHVHAIIGPNGAGKSTLANIMGLSGYRDFEG  
DILFEGESIKALSVDERARKGITLLFQEPARFEGGLGVSQFILAGAKEKSRTVVEEALQKA  
GLSPEKYVKRAVDKTLSSGERKRIELASIAMKPRLLMDEPDSGVDIDSIKIFAVIKE  
MRHMGSTVILITHSPEVLKHADHAFLICAGTLVDKGMMSRMFDYFNGKCVPCVHVGVQPS  
NTLLSGSSAPAVAVS\*

>SPBIB\_v1\_210089|ID:27162981| SufBD protein [Uncultured spirochete bib]

MSEQATADKEKLLAELLASINQHSFAPDVAHVEIHGNQVLNKNLVEGLLVESETIEDGVK  
VHIRVRKGVTLKNPVNFCFGLIPDNGIQRIIIIDTVIEEGAHAKFIANCTFPNAVNIQHLM  
NAVITVEKGASLSYFERHVHGPKGGVTIVPLTKVIAREDSRFSTEFELIKGAAGVIELDY  
EAEVEKNATVDMKTRIFGRSSDRIHIKEAAHLSGEGATGVLTSIALKNTASANIENEIV  
ADAPYARGHVDCKEIVQDEATARAIPVQVNNHLAHVTHEAAIGSVDSKQLETLLSRGLN  
EDQATDLIIQGLLGSDPFS\*

>SPBIB\_v1\_210090|ID:27162982|dppF| dipeptide transporter ; ATP-binding component of ABC superfamily [Uncultured spirochete bib]

MADIILSIKNLKKYFEPHQSFQAQSIIGGGQKKLIKA VDDISFDIRRGEIFGLIGESGSGK  
TTTGKLVKMLIEPTSGQMIFNGEDVTRLDKEKLKEYRRKVQMIFQDPYASMNPRFKIKDV  
LEEPLIIHKVKATIEERTKMIVKALEEVKLTPAEYEMGRWPHMLSGGQRQRVATARTLIL  
NPLMLVADEPVSMIDLSTRAEILYMMKEVQKELGLTYLYITHDLSTARYFTDRIA VMYLG  
RIVEIGRADDIIDNPLHPYTQALIEAVPEPESEGKVNIIKELPIYGEIPSPANIPRGCRFH  
TRCPYATDACKTEPEPELMLDGEEHYHACRRAYEIKAEERSAKAAG\*

>SPBIB\_v1\_210091|ID:27162983|oppD| oligopeptide transporter subunit ; ATP-binding component of ABC superfamily [Uncultured spirochete bib]

MNSLLKVENLEMYYFTSKGAVRAIDNISFELMPGETIGLVGESGCGKTSLGTSILRMPTP  
PGRYVGGKIFVDGLDVIPLPEKEVRKNIRWQKISMVFQGAMNCLTPVYTIGHQMMETLNE  
HADMSRADADSLIKEYLG YVGLPPEIMGRYPHELSSGGMKQRAVIATALFLKPEIVILDEP  
TTALDVIVQAQIINLLKLLKQFNLSFMFITHDLAEAEVSDRICVMYAGKIVEFGTNEQ  
IYGRQGPAHPYTERLLAATPRLFKKVEKLHFIPGTPPDLIAPPKGCRCRFSRCNKAFGRCF  
EEEEPLIEIEPGHMAACWLHHRG\*

>SPBIB\_v1\_210092|ID:27162984| ABC-type transporter, integral membrane subunit [Uncultured spirochete bib]

MTFGDIK YRLNEFWSEFRKERSGLIGLIGILIIALLIVIFEPLILPWKDVNTKWRSIDYWQ  
DNSANAPPAWTFNAFTKLKAPVTMRLEDAKKEETELDGGIKLVTYTFDYHYTADKAPLDVI  
LHITGHGDIPFQVAIERPDGETIDLAQRFEQGLSGQDIRLSIDNDGREAAFTFVKNYESQ  
EALQFSGKSLRTADVLFNIAQPGMAKEFKPLKGTYKLIKAMLLDPENSSVEEPIVVT  
GSVSGILGTDDSKRDLFSGLIAGLKWALLIGFLTSAISVLIGVMYGIISAYFGGAVDSVM  
QFVYQIVNSMPVLPVLIVISAIFKPNYMLILVMVLFVWTGSVMTVRSMALQIKEETYIE  
AAKALGAKKSRIIFKHMVPILIPYSFASMA SVPSAIVYESSVLLGLGDATIVTWGQIL  
HDAMQGAAILKGIWWWILPPGLLIAIMGMTFAFLGFSMDKILHPKPKTR\*

>SPBIB\_v1\_210093|ID:27162985| ABC-type transporter, integral membrane subunit [Uncultured spirochete bib]

LHAKNDEYFDILFNQKEQVAFMYKWFALKRVLKGIIFTYIIIFIMSVLFNTVNEQTMRAS  
IEDQVRAESMRLKNMQPSAIQRFFQQRRDELHLYRLDRPLLERILFRTWNTVTFNFGKS  
TIKSSRGERDVITIIGEAI PRSLILFTLAAAIEIAVGIILGLKKAQKPGGTLDRTTSL  
TMIVYGMPTFWLAMILIMFFVYQLKIFPSAGMHSVPPPQGIMYFIDLLWHMTLPLLTLL  
IGFWGVSVFVRNIVLSILQEDYIMAAARARGIPENRVLFGHTLRTAAPPLITISVLSLLAS  
ISGAIIFEGIFSWPGLGNLYWIAVQQNDIPVLMGDLAVTVGLYQLGLIMLDLTYGFMDPR  
IKVGGKA\*

>SPBIB\_v1\_210094|ID:27162986| ABC-type transporter, periplasmic subunit [Uncultured spirochete bib]  
MKKILFVSVLAVAVLFSAAAQAKNGPIADKVIYDVRMDQTIAIKDTAEGKTDVFFTGLDG  
KTFKGIQPADA EKLSAYAVPSGSWSLLL NPIP NKAPYTFVHKDGR TIFNPLAIREVRYAI  
NWLIDRKKIVDEILLGAGEPALTAQTGPGPGTYKFNLVPAKLGMTVRGNEKKALADIEAA  
MKEAANLPENKGLVKSGQWWTYNGEPVTIRFIIRVDDPSGRLLLEGRYIADQLEKAGLKV  
ERLEYDRSKAGKLVYSGDPAAWEWSMYTEGWGAGATRAWWVDVTISQMYAPYYGYMPGGMT  
DGFWNYENKEIDKIAQKNINGWFLTADEYWNNDNMKVQEMALKEAVRIYVCSQVQYYVANK  
ARFNSRMLYGLGDGLNNWSVRSADV KPN DKGEKVL RVTQYSARGGLFMSSWDPVGVGDGFS  
DVYSA AIVEACTDPSTFEAPNSAKDTPLRVKYDLKKVETKLAAGKEGEPVGLIDVDKAA  
LIYNSKTKKWETGVEFKDVGDKYDYVKNNAIKSYSKLSDLQYIYGKWHSGQPVTLADIM  
YATAFAYEWANKSDDDDKYDEAYASQYQSTLPISKGTVLNKDGTFTTYFDNWPMDKDR  
VAATGTVSPKAGNPGRQTMVSWEIYEALAKLVAEGSKSGTQYSFSSDPSVTEVDVINPKC  
VADIKAKLQDFVAAKYVPDTIKQWVTPEQAVARYNAAIKFIDTYGHA YISNGPFFISKVD  
YNANYIELSAFRDYPKSDYFPKLFRTTITRIDDVKVPATAQRTADAKIDIQVSAVTPD  
DTAKAADSKAKVTVSMILADNSEKLYTAKYVSAGNFQVVIPAKDLGVLKPGAYTLVVQSV  
LASESPSVQASSLVLF\*

>SPBIB\_v1\_210095|ID:27162987| conserved protein of unknown function [Uncultured spirochete bib]  
MEGNPMNIAGAENGHFVDANGRWLILRGVNLGGSSKIPKVPDGRTHLREGFYDGAHISFI  
GRPFLEEAD EHFARLVRWGQHFRLLVTWEAIEHEGPGIYDVQYLDYIEGIAEAAARHG  
ISLFIDPHQDVWSRWTGGDGAPMWTLEAVGFEPRLHASGAAMLHQEMGQQYPQMWFNS  
HLRLGCATMFTLFFAGNDFAPGVLASGEPIQDFLQRHYIEAFGALARRLTAYPNVVGFD  
LNPEGEGFIGLS DIRKNRSDFVLPGLAPTPLEAMSAGEGLTTFANEIRIKGLGLQNVGRK  
PLGTPGKRAWKDGEVCIWRRAGVWDIEGGTAVAKKPQWFALKDNLAGGSPHAFFNEKYLK  
PFIERYAAHIDAASASSRKRTRRFMMFIESSPVGDMPTIKQGAAWN FVNAAHWYDALTLTM  
KRWTGFIA YDSATQKVIIGPRAVRHYFKEALARIANHSKEHMENAPT LIGEFGLPFDING  
GHAYRTGDFKIH ERSALSAYYDGLDANLLSATIWN YTADNTHAYGDGWNGEDLSVFCREDG  
GGRALAGFVRPYAMAVAGKITLMEFDHARGTFVLEFEPNKRIKAPTEIFV PGLQFLHGAD  
IVLSGGELMDLSNSSPAALQEEKLSGLSAKAGKRYVLSGMERESFLILRIEADPDAQVC  
RLSILRR\*

>SPBIB\_v1\_210096|ID:27162988| conserved exported protein of unknown function [Uncultured spirochete bib]  
MRVLCLMVAIIALVAFPLMGQEKNLVLEGDWEGILKVGSASLRIFHIASAQGRYTATMD  
SPDQGARGIPVSAVRLDGSSVLEVASIGGSYTGSDASFSKIEGKWKQSGMAFPLVLNK  
SKKGAQAQQNTPELQDAPALQGAPAPQPQNQSVQVSQEPTPPFPYAKDVEFINEKAGIV  
LAGTLTVPNGAGPFPAAALVSGSGPQNRDEEILGHKPFVLADYLTRRGIAVLR YDDRGV  
GLSKGDFQSATTDFDADDAEAAL EFLARQP GIDAHRLGVIGHSEGAIIASMLGARDPDVA  
FIVMLAGPGIRGDALLMQNTALGRASGLSEAQIAQANELNRRLYDIALEDGDAAILQKK  
ILDVLENAIDTAEELTQE QKTAQKEKASLIAAQLVSPWMRSFFAIDPSEY LKQMRIPVLA  
LNGSKDLQVPASENLAIRA ALESAGNRSATVVELDGLNHLFQHATTGLPSEYGEIKETF  
APEALALIGDWILKMNVR\*

>SPBIB\_v1\_210097|ID:27162989| Ribokinase [Uncultured spirochete bib]  
MRILNFGSLNIDYVYRVDSFVKPGETKAAQSLSVFPGGKGLNQLSLAMARAGLAVAHAGKV  
GKEGGFLETLQKGGVDTRLIETSAIATGHAI IQVDDKGGNCILLFGGANQDIDEHYDR  
ALAGFGSGDMLVLQNEISSMASIISKAKSRGMAIALNPSPYSESILSYPLELIDIFIMNE  
IEAEGISGTHEPEAAASLIARSFPQARIVITLGENGLCLYK GELVRQKAYKVQAVDTTA  
AGDTFSGYFLAGLVEGLSTKNALDLAARAAAICVTRKGAADSVPWRKELE\*

>SPBIB\_v1\_210098|ID:27162990| Aldo/keto reductase [Uncultured spirochete bib]  
MIPQIPFGRTGHNSRLLFGAAALANVSQAEADSALNLVLDSGINHLDTAASYGQAEERM

GPWLAQHRHEVFLATKTEKRTKKEALAELESLRLLHTDYIDLWQMHVLIKDDDEWDIAMG  
EGGALEAFVEARQKGMVRFGLVGTGHGKAAPAMHLRSLERFDSDVLPWNWPLAQDTAYA  
AAVRTLLYVCKKRNVAVQIIKAFLRRPWCDRPHMRATWYEPLEAPADISLALGWAWGIEG  
AFVNSAGDIHLLPTIIQEAARQPARPTDEAMAQMALRLGMQDLFA\*

>SPBIB\_v1\_210099|ID:27162991| protein of unknown function [Uncultured spirochete bib]  
MSRTDGAEAGKLKIGDHWNVISIIALSQNNPLKAVAEFVENSIDASARNVAIIRGKQKNE  
YYLRITDDGCGIQDFRYVATHIGDSIKRKLKVQSGDIQGEFGIGLLSFWTIGETLTLTS  
AGKDGVARTMQLVKGPNPSYAIRETGMLFARPGTELLIHPLLPGIRSISAEKIQNFLASEL  
RDRIARSGVHIAIIDHTTRRELVVEPRKFRGRLIHQLPEARCPFGEIYVELYLAESPQEA  
AVGLYKHGTRVIADISRLERFARSPWDSRCIEGIIDASFLQLTPGTRDGIVQDEVYDSFC  
VALEPVEEALGALLEEQKRALEEEASRQLLNRVTRAFREAFLYLPEEDYSWLAARVREPR  
RAPSAGTSSQSGAGEASANGEGSDYRESSSRTEEQNPATHASSESSDSLGDSENAALGEY  
IPEPNRQQSKTVQKSFDEFAGPLHKLMLSPSSSVIGTSEERRKFKAIARDRAGRLIDSGID  
FAWHLSEGGGALDGINSPIAEYIAPEEPCVATIELRASQGDITLTATAITVTAEIKRA  
SGTGSAQRRGLPGYTYKKAPGELWRSRYDAENAILINNAHADFIHASRQPMTKLRYIAR  
LFAKELVLANFPEASREEILERLVELTLYTEENLK\*

>SPBIB\_v1\_210100|ID:27162992| conserved membrane protein of unknown function [Uncultured spirochete bib]  
MLEIPALAKILVIFALIVVAAARRIHLGLAAAVGGIALAIWQGMPSAIALAVAKELTNP  
DLILLVILLTGIMMFSAMKKSAMDASFNAIAESAPSRRIALAVAPLLIGTLPMPGGAI  
ISAPLVGAMNDDDGRRPETLSAINYWFRHVLELVWPLFPFILTVGLTNLSVMQLVLLNL  
YAPFAVFGLGLIFILPKNGKTAATMPASKTAVNNTFRDTAKFGRLVRGIAPLGMILGSYV  
VLDLIWELVAPGVALDAPTKSLIGRYVPVLCGLLIGSLYLKNTKGEKIFKHSITASTIE  
LIAVIVGIRLFSALMSAADLAHAASMEANAGIPAIFVIALLPFISGIVTGVGMGYVGLS  
LPVGLGLASSDIPFKVGVVIAGAFGYSGMMLSPLHVCMVVTAQHFKTTLPATIRKFALP  
LGIFLVIAIAYTALLSVVLR\*

>SPBIB\_v1\_210101|ID:27162993| conserved membrane protein of unknown function [Uncultured spirochete bib]  
MLLPYSFYNSAWKFLSIALVVGLAVGGYFVPELGLGVIALILFALLTNARSSRSFCAGFC  
PNGRSLSVFEKTSKHKRKLPPFLASREFRMLCALMMFCVISLLSQSNGSLAAIGKVFWA  
IYLASIGISTIAGLLWKPRAWCAFCPMGTLQDTIKGH\*

>SPBIB\_v1\_210102|ID:27162994| HAD-superfamily hydrolase, subfamily IA, variant 3 [Uncultured spirochete bib]  
MEGSWRPDDSSLKGYAMSDIIFKAVLFDMDGVLVDSERLIAESAVRMFKERYGLSVRHED  
FVPFVGAGENRYIGGVAEKYGLAIDIEKAKAWTYEYIGKLAKAHAAGMRAIPGAVDYVRQ  
CRAHGLKTALASAADRKVLINLEYLGLGPDEFDVLVTGGDVAHKKPHPEMYLKAAEALG  
VLPSECLVVEDAVNGTIAGVRAGARVLGITSSFPEAELRKAGASWIAADLARAPLPWELD  
\*

>SPBIB\_v1\_210103|ID:27162995| Cupin 2, conserved barrel domain protein [Uncultured spirochete bib]  
MFGKHS DAGFHQPIPGNHKTLCTYGAHTLLVEVRLNKDALLPEHQHPYEQTGYLVSGRIR  
MFIDGKARELDPGDSWCIPMDVLHKVEVLEDAVVVEVFSPTREEYLKYENPEDIIR\*

>SPBIB\_v1\_210104|ID:27162996|czcD| Cadmium, cobalt and zinc/H(+)-K(+) antiporter [Uncultured spirochete bib]  
MVMDAHDHHDHSDSEALEVEESGGKLLASILITSATLIAEVVGGILTGSLALLSDAAHVF  
LDIFALGLGYIAVLMSKRAATGKHSFGFYRMKVLAAFINGATLLIVSFEIIREAIGRFAH  
PQPIIAGPMLIVAIIGLVANLIVAFVLKGHSHDDLNARAFLHVLGDALSSVGVIAAGVI  
ILFTGWYWDPLAGILIALVILRGAFSVLKEATHILNEGSPENADSAEVAEIAEIEGVK  
GVHDAHVWALEPGYRVLSAHVLDLDDQPLSATAEIMDHKIDMLHDHFEIKHTTIQFECGDC  
GQCGSAIRA\*

>SPBIB\_v1\_210105|ID:27162997| conserved membrane protein of unknown function [Uncultured spirochete bib]  
MSVKEWSPNKKLLVLFVFLAA YFIPFQAPRVSGAINEAFLMLSEYAQQHVILCLIPAMF  
IAGAITVFLNQQAVMRYLGPDAKRLMAYGVASVSGAILAVCSCTVLPFKGIYKKGAGLG  
PAIAFLYSGPAINILAIVLSAKVFGGLKGIARTVTAILFSVVIGWLMAQIFKKDDEKRAA  
DARLFKAPLGEERPRTLGTQSIYMASMIGILVFANWANSRGGSPVWDIAIYHAKWWITGGFA  
AVLAYTVIRWFNADDRMAWVVA TRDFALQILPLLFGGVLVAGFLLGRPGHEALIPNSWVA  
GLVGGNSIFANLFASAAGALMYFATL TEIPIVQGLLGAGMGQPALALLAGPSLSLPSM  
LVIAGEIGWKKTLTYVGLVVALSTLAGLVFGAIA\*

>SPBIB\_v1\_210106|ID:27162998| Redox-active disulfide protein 2 [Uncultured spirochete bib]

MKIQILGPGCPKCRILLEQHAREAVNELGIQAEFEKIEEVDDIMAFGVLMTPALAIIDDEVK  
VVGRVLTQDKIKALLS\*

>SPBIB\_v1\_210107|ID:27162999| Regulatory protein ArsR [Uncultured spirochete bib]  
MKQLERRYERRAEIFKALANPLRLVMLEKLADKPWCVCALADELGVDKSIVSKYLSQLKS  
AGLIEDTRKGTLEVEYRLVAPCILQVASCHEETIQEQKKKLLSEE\*

>SPBIB\_v1\_210108|ID:27163000| Citrate transporter [Uncultured spirochete bib]  
MSPNISAVYVLILAFVGIASGKFPRLAMNRASIALTAAVLLVVLGGLTTQEALAVVDTE  
TLALLLMMIIVANLRVSGFFLIAGGRVLSIARSPRILLAIIVVLVSGVLSALFLNDTICL  
MFTPLVAEMARRSGRDGRPYLIALATSANAGSCATSIGNPQNMLIASQSGIPFGTFVLAL  
GLPSLIAMLLSYWMTVLMFPSEFRANTMLRQPVGCVTADAEAGHAEMSPYLMYKSLAASA  
LLLVLVLLAGVRTSHAALIAASILLITRRVHPERIFAEVDFTLLVFFSGLFVLTAAVARTD  
AFAMAMQWLTPHLQRPGLFAAAIALASNLVSNVPAVMLLSPAARAMANPQPAWLMLAMA  
STFAGNLTLLGSVANLIVAEQSEKSGIHIGFVDYLKVGLPVTLLSIAAGTLWLGIIIL\*

>SPBIB\_v1\_210109|ID:27163001| putative NADH dehydrogenase/NAD(P)H nitroreductase AF\_2267 [Uncultured spirochete bib]

MDLNDTLKTIFSRKSVRAYAEGAVSKEQLEMLVRAGMAAPSAVDQRPWEFVVVTERATLN  
ALASRLPYAKMAAHASAAIVVCGDLRRQWGGPDSVMWVIDCAAAAENVLLAAESLGLGAV  
WTAVYPYPERIRSVRELLGLPDYIQLALIPVGIPIRGGEKAKDKWNPERVHWEKW\*

>SPBIB\_v1\_210110|ID:27163002|arsC| Protein ArsC [Uncultured spirochete bib]  
MVKVLFLCVHNSARSQMAEAFCKKYGEGKFVAESAGLEPGKLNPNYVVRAMAEVGDISKN  
ATKSVDFHNEGRTYNVVTVCSKEAAERCPIFPGAPITLHWPFDDPSSFKGTDEEIMQK  
VRSVRDAIEQKVMEFVSQWPRVSE\*

>SPBIB\_v1\_210111|ID:27163003| Dihydrolipoyl dehydrogenase [Uncultured spirochete bib]  
VESKQYDFVIGAGPGGYVAAIRAAQLGLSAAVVEKDLVGGVCLNIGCIPSKSLIHAQL  
FAQGKALLEKTGAKVDLSNFDYSLVWKASRLAADRLSKGVNFLLRKNKVDLIK GKAMLSG  
ASTVDVETPGGSVQLKAKAILLATGSRPRPIPGFAFDEKKIFSSTGMLMSDKLPKRMFIL  
GAGAIGMEFAYVLNAFGVEVTVAEELLPRVPLEDEEASKIVEKEFRLRGVTMYTGARASG  
AEVKDDHVVIHLTDAQGAPLDIEADAVLVSVGRATNTEGLGLENLGVRMERGIYITGDYH  
ETSCAGIYAVGDITTPQLAHTASKAGEIVAERVAHLLKGTNPRTVDRHLHVASAVYC  
EPEVASFGLSEASAKEKIRHEVARFPYRGNGRAVATEAPEGQVKIVFDPDTKAILGASI  
VGEGAADTIHELLLASKAELTIEDVAELVHAHPTVSEAIMAAKAALGRAIHI\*

>SPBIB\_v1\_210112|ID:27163004| putative Lipoate--protein ligase [Uncultured spirochete bib]  
MPIVAQSYKVVSDSPLDIISFEECLVNSWAGEEALLLFYVNAPTVIIGRNQNYWREVSPS  
CKVPVFRVSGGGAVYHDEGNLWALIVPRAIHSQDDELA AVASAIGTLGVYARPGARGG  
IFVSLGDGETQGKISGTARRFGTQNVLHHGTLLVSADIAALKASLGGIKVFEDSSIASVP  
GHPVNL SRFLSSLSVEELMLHLSRTLGSAPATIELADFWNKEKTIARRVFKNPEDLERE  
FDFCVECEEFEAHRKQFGSKEWIIDRSPFVSVVVSNGRAKAVVRVQEGKILQVVPLEAGD  
SVSARYADELNAHFEGMAFD FRMPEIMGKEYQRGIEAI\*

>SPBIB\_v1\_210113|ID:27163005| exported protein of unknown function [Uncultured spirochete bib]  
MKLVKVI GLLVALTLFSCAPKLAQKDLDAANAAFADAQNAKADVYAPDEFKAAQDAKAA  
LDAELAAQDAKTSKSYKQANDLIKAFADASKKAKDAAATNMDKVKGEVAQLITDIDAQY  
AAVQALAAQASKDAKKA AKAKLNVKDINARVEAAGKSISDAKATNDSQDYAGARDQLNTV  
KATLDELKASLEAAGFVAQ\*

>SPBIB\_v1\_210114|ID:27163006|speE| Spermidine synthase [Uncultured spirochete bib]  
MKKIIERLNPCHGCFYYDITKVLVRVRS AWQTIELAESPEFGKVLLLDGITQVALKGEERY  
HESLVIPAMLSHPDPQRVLVIGGGDGGVLREVLTFTGTVRNAMVELDEAVISFSKQYMPE  
ISAGAFDDPRAEIVVGDGRAYVEQCPDTSFDVVIMDMTPDFGPSEKLYTREFFA QVKRIL  
RGAEGVFAMHGESPIARPAAYACIEKTLRKVFSCVKS AFTYVPMYGTLSFKFASGTTDC  
ASLSAKDVGSLLNARCERMPKYCMPQTYKAIFAPEPAAIEALFHPEGRVIEDRRSHFPDA  
FDPQGA\*

>SPBIB\_v1\_210115|ID:27163007|speD| S-adenosylmethionine decarboxylase [Uncultured spirochete bib]  
LVRRVKGKTLKLEGFNNLTKSISFNIYDICYARSRESQIEYLEYVDEEYNSKRLEEIVEN  
VTRMINAKLVSVSTQDYDPRGASVVALINEGSPVADEHIKSDKEQTGPAPFVIGHLDKSH  
IAIHTYPEYHRLTGLASFRVDIDISTCGMISPLSALNYLIESFDSEVVIIDYRVRGFTRD

HKGRKVFIDHDISSIQDYIDQDILERYITYDINILSDNNFHTKMRKKEIRLKDFLFGDEV  
TSLDPKEKERIRRALLHEIQEIFECRNLNMRSGR\*  
>SPBIB\_v1\_210116|ID:27163008|potA| Spermidine/putrescine import ATP-binding protein PotA [Uncultured spirochete bib]

MSVRLVNITKEFADPEREGGKLVAVRDFNLEIQEGEFVTLLGSPGCGKTTTLRMIAGFEM  
PTTGEVWIGGKNVSNPPNKRDTSMVFQSYAIFPHMSVEQNVGFGLELKGPKAEITREV  
RQIMEVMGIADLAHRRPDQLSGGQQQRVALARAIVNRPSVLLFDEPLSNLDAKLREQMRV  
EIRRIQQTFKITSVYVTHDQAEAMTVSDRIVVMSKGRMMQVGSFPEIYSRANRFVADFI  
GRVNLLSVTVERLEQEKNIVRGTDGSRYEAASAASGVAEGGKALLMVRPESLSVESSAGA  
APAAEGRMAFAAQVIDKTVYLGATVEYEIDAGYERPILAVSHDPVDAGFWRTGDRVVRLY  
SPRAAHLPPPESE\*

>SPBIB\_v1\_210117|ID:27163009| conserved membrane protein of unknown function [Uncultured spirochete bib]  
MAHGISKAAAEELRRAARDPVLVAGSLIVFVLYPLISVGAASLDVGGGKTGLGVY  
RDVIRSAYLKAFYNSLMMSTLTALVGTLLIGFLFAFAVTRAKVPLSKFFNILAIPIVSP  
PFIGALAIIMLFGNGLITWNLLKIQNFPIYGFNGLFLAQVVTFFPVAYLTLKGVLESMN  
PVLEDAALDLGGSRWKVFTKVTPLAFIGIASSVLLLFVETLADFGNPLILAGSKFPILS  
VQAYLQIVGMYDLKGAASVLLLVPSLIFFYAQRALVNRKYYTTVTGKPPQSTTQIVSP  
GARIALFVFLFVALVVGLIYFSIVGAFKVVWGFHDHLLTLDHFKFVFGVGFKAVRDTLM  
IAGIATPFAGLLGMVIAFLVVRVKFPGRKFVEGVSMLSFAVPGTVIGIGYILAFNHKPLA  
LTGTLAILLNFVFRYIPVGIESGKALLASIDPSIEEAAVNLGADSRKTFSRITLPMILP  
AFFSGLVFAFVRAMTAVSAAIFLVSSRWNLMTVHIMAQVESGNLGAAAAYSLLLVLIVAA  
AISLIRVALKSQYSKYGGAMLHF\*

>SPBIB\_v1\_210118|ID:27163010| conserved exported protein of unknown function [Uncultured spirochete bib]  
MKARRMILYMLAIIAIVPAFAKPGQTLVVYSSVDEVNAKKIFDAFTADTGITVQFVQLS  
SGPAYARIKAEASNPQADVWFGAPSENHIIAKEEKLTPYKGPVDFDKLSKEFKDPDGYWR  
SFYMNPMFAFVNKEVLARIGAPKPTSWADLLNPAKYGQIQMPSPQSSGTAYNIVASLVVM  
MGEDKAFDYMKKLSPNVQTYTSSGTAPSKAVQLGQCAIGIQFTPAFFEIDKGFPIEVIF  
PKEGVWFEAPAVSILKGAKNLEAAQTLVDWLTTKGQSVYTEKKTYFYPVLPVPLGAGM  
PAFESLKTIDVDIAWAGEQKKRLVERWVNEVLTAK\*

>SPBIB\_v1\_210119|ID:27163011| putative Beta-lactamase [Uncultured spirochete bib]  
MRSTVSSMSNEIQRLTIDAIEHQWFAGAVIRLEQEGEVLYEGAFGSAIKTAQLQAPMSAT  
TQFDIASLTKLFTTTAILKLVSEGRDLDAPLVTVADGKLA VLLGAEESGSNRRVADVLE  
KVSTRALLTHSSGIHYWYPFYAARESIKASARSAGSPAGSPVENPAASPAGEPYSAFDS  
IFETVLARFPLQHTTIYSDINFMLAGFIVETVSGPLHEAIPKLVCPVPLGLERCAYLKDA  
SSARNAFEAGGDSTYAATEFGNRIEMKMVADLGLHFSGWRSIDQPIVSAPNDGNCHYFFH  
GVAGHAGIFTTARDLCRLGNLYAGVDNANYIADDLLEEA VTDHGNRGLGFQFGPRYPQG  
CGHTGFTGAYLFVSRNRHLSLSILTNRHLVPEPRDIDPFRKAI AELAIITI\*

>SPBIB\_v1\_210120|ID:27163012| putative GCN5-related N-acetyltransferase [Uncultured spirochete bib]  
MQIKIEDAVPGDIAQCARIACDSEIGQRYGFVEETLAARIQMRLQEGDVVLVARDMGAIE  
SASSSNGAPSDIIGFAWIDTKGGFGQAPYLKLI AIDASRRSTGAGSLLLSAFEERTRGAG  
RAWFLLVSDFNDRAIHFYKKGHYAVVGTLPDFAKDGITELIMYKRQEA\*

>SPBIB\_v1\_210121|ID:27163013|oppF| oligopeptide transporter subunit ; ATP-binding component of ABC superfamily [Uncultured spirochete bib]  
MNTIQPLLEVKNLKVYFPIEKGIVIRKRIGWLKAVDDVSFLVQKGEAVGLVGESGCGKST  
TALAIAQLQRITNGQILFEGRNLSALPPSELYAERNFQMVFDQPYSSLDPRMTAFDSIA  
EPLRIQVRRGSLNLSEADIRKVKVLDLMDKAGLSRTFAHRYPHEFSGGQRQRIGIARALAL  
SPKLVIADEPVSALDVSISQILNLMKDLQAEGLTYLFIAHNLA VVEYFCGRIVVMYLG  
TIAEIAPSEMLYHEPLHPYTKALLSAVPIPDPPRERQRSRILLKGDVPSPEERVGC PPF  
ERCPSAMDICNAQRPLLREAGAGHMVACHLYAREGDSHANKN\*

>SPBIB\_v1\_210122|ID:27163014|oppD| oligopeptide transporter subunit ; ATP-binding component of ABC superfamily [Uncultured spirochete bib]  
MIIGTEPVLSVRNLSTRFMTSSGTVKAVDGV SFDVRKGEIFGIVGESGSGKSVTNLSILR  
LIPMPGQIAEGEIMLYGKNLLAANEHELQMVRRGGSISMIFQDPM TSLNPLLRLVSLQIAE  
ALELHHGLSRKEAEKKA VELLKAVGIPDAERRAQEYPHQFSGGMRQRVMIAMAIGCNPD L



LIADPTTALDVTIQAQILDRLRRLSDTRTMSVILVTHDLGVVAGMCDTVAVVMYAGKIVE  
QASVDPLFREP KHPYTOGLLASVPRIDRAWSERLYSIPGAPPNLVDLPPGCAFAPRCEHA  
MPICSQSYPPQIEMDDGSGNKRTVRCWLHADNVPVHR\*

>SPBIB\_v1\_210123|ID:27163015|yIiD| putative peptide transporter permease subunit: membrane component of ABC superfamily [Uncultured spirochete bib]

MARLLKNPIALVGLAIIALYTLIVIIISQFWLPFDPLQMDVAHILES PFR TGH LFGTDEF  
GRDILSRIMKGTGISLLIAVLATAIGATIGTFMGVWAGFLGGAWDHWIMRLADVLFSFPS  
LLLAIFVMAILGENTYNVIAISIVYIPQFARVSRGAVLAIKNNEFVRAAFSSGADRRFV  
LSRHLLPNIMMPIIVQSSLSLSVAILLESALSFLGLGVQPPHPSWGNMLSSARKVMMLAP  
WTAIYPGLAIMGLVLGFNLLGDGLRDILDPRLRNIK\*

>SPBIB\_v1\_210124|ID:27163016|nikB| nickel transporter subunit ; membrane component of ABC superfamily [Uncultured spirochete bib]

MGRYIFRRLLSLIPVLLGVSIIVFFLVRLIPGSALQMYLGTQVEATPEQMEELRRIFGED  
RPVPVLYVEWLGRLLRGDLGYSRLTGREVLDPILQRLPLSIELTFYALFLSLIIGIPLGI  
LSALKHDPVTDVSIRITGLLGLSLPQFWLASLMVIAFSGFRGWIPMGNYVGLFKAPLDNL  
RMLFFPSLAIGIGLAAVIMRYTRNSMLEVLQMDYIRTAQAKGLAKRIVIVRHARNAILP  
VITVAGFNTGYLLGGAIIVIEVFALPGMGRLALYAIYQRDYSLIQIVLVIAATLFLVNL  
VTDLIYAAVDPRIRLETREG\*

>SPBIB\_v1\_210125|ID:27163017| ABC-type transporter, periplasmic subunit [Uncultured spirochete bib]

MKRLLAIGLALAMVAGIVPAVFAAGEEKVLTIGVDQEAIGLDPHIVTSFSSHRRVDLLYN  
KLVRH DENL KIVPDLAESWEIPDNQTYIFNLKGVKVFHDGTELT AQDVEFSLNRILDPKT  
ASPGRSYISSIKSIEVLGPYKVKVTL S APLASFL EGLASNNCAIVSKAAVEKYGNLQKVA  
VGTGAFMLKEWIPDNSMTLVKNPNYFEKGLPYLDKIIFRVIPEQASLLAGIKAGTLDMAQ  
INDASTILLAKRDSNIVVMQKPGINVRTFGFNTTRKPFDDARVRQALS LAIDRNEIVTVA  
EFGMAQPTGPIAGATQWALPLSKLPYTPDYAKAKALLAEAGFPNGFTFKIVTANSFEG  
GLSVAQVIQNQLKKIGVNAELEVVEWGIYDRWVKRDFDSMVELRGGSGEPDRFLYRTH  
STGGVNNFLFKDADVDRLLDKGRVLT TYAERKPVYDELQV VLAEKAPIIFLYCPFETHVL  
SKQVKGFQVGYGSLYYLIQTQK\*

>SPBIB\_v1\_210126|ID:27163018|anmK| Anhydro-N-acetylmuramic acid kinase [Uncultured spirochete bib]

MESEKTASSLFRLSAYQSRHERALIGIMSGTSFDGIDAVLVRIITDERGHASLAMEGHY  
SLPYSQELQKRLALCSPETARIDELVYAHAA LAE WYAGAVEGLLGMAGRKAQDVYAICL  
HGQTVWHAPVPRAFPGPSGQSV AARGTLQIGSAPLLHERTGIPVIYDFRSRDMAAGGEGA  
PLAPFVDALLFGSLERGRIVQNIGGIGNATVIPAGAGNEAVFAFDTGPGNMVMDELAKRF  
SNGALAYDKDGLLAARGRVSHELLEPLEDPYFSRKPPKSTGREVYGAEFAARFAVRGRA  
LGLSDADIATATAFTAETIVRAYRDFVFLVPIDDVIVGGGALNPSLMAMIRERLPAH  
ATLRTTADYGIPVLAREAIAFAVLGHEALMGHPSNLP AVTGASHEVILGSLTL\*

>SPBIB\_v1\_210127|ID:27163019|rbpA| putative RNA-binding protein RbpA [Uncultured spirochete bib]

MGKKLYVGNLSYNTTEDSLKERFEAFGHVESVRIITDRDTGSSKGF GFIEMGTDAEAQAA  
IASTNGQEV DGRMLKVNEAMDKPRDDRSRDNR RRGSSYSY\*

>SPBIB\_v1\_210128|ID:27163020| NADH-quinone oxidoreductase, E subunit (modular protein) [Uncultured spirochete bib]

MAMNGKKGAGETDDAVGNTSILPNTTAPKTQIKYRDTLLFRLHEVQNRTRGKTWITKEEL  
AGIAQDYGIPLAELDGIVSFYTMFSRERRGRHVIRLCDSLSCRICGSLDIYQHLRKKLGI  
SRGMITTGDGAFSLEIVNCLGACSTSPNIMIDHLSGLSLAEIDAMLDRLAKEEV\*

>SPBIB\_v1\_210129|ID:27163021|nuoF| NADH:ubiquinone oxidoreductase, chain F [Uncultured spirochete bib]

MSNIQYITGFATLENPLDIDSFVAKGGFSLHLSALAMTPAEVISEVKRSGLRGRGGAGFP  
TGLKWESVAGDDERYLVCNADEGEPGTFKDRFVLEHAPFLVLEGMAIAAYATGAQTGYVY  
VRGEYPHVVASLSSAIASAVKAGYLGEYILGSNFSFNVEVRKGGGSYVVGDETALLNSLM  
GNRGYPFLKPPFPTEKGLWGKPTIVNNVETL A YVPYIFTHGAEAFASIGSPDSPGLKLF  
ISGHIAHPGVYEFPMGTTVRELAAAAGGILGNLKA VQIGGTAGPIFDTAALDYPLDFASM  
RKAGGALGSGALVFMNTTVNMAHVLEVTMRFFAEESCGQCFPCRYGTRQLAFMANKIASG  
QGKLEYLDLMRDTTHVMVGASFPCFGQSIAPLESLLDRFGDEIVSFIKQQEFLKEAAV\*

>SPBIB\_v1\_210130|ID:27163022|hndD| NADP-reducing hydrogenase subunit HndC [Uncultured spirochete bib]

MKNVTLTINGKKISVPEHTTVFSAAEKAGISIPALCRHEDLEPKGACGMCIVKIEGQPGY

KRSCVTAVEEGMEVLTSTAEIRDIRRGILELVLAHPADCLQCIKHGKCELQTLAERFEI  
RDLRYDRYTRGLPVDRSSFGIVRDMNKCIGCGRCVQVCNEVQTVASIFFHGRGSNTIVSP  
AYGTTMGDSVCVNCGQCIVYCPVGALYEKEAIEEVWKAIDDPDKVVVAQIAPAVRVAIGE  
EFGLEPGELSIGKLYSALKALGIDVVFDTNFSADLTIVEEATEFLERLKESGPFPLITSC  
SPGWIKFGETFYPELLENVSSCKSPQQMLGALIKTHYAESRGLDRNNIVSLSIMPCTAKK  
FEAGRPEMRSSGARDVDYVLTREIARMIRQVGDIFRNLDPGTPDPLLSRYSGAATIFGA  
SGGVMEAAALRTAYELATGKALEKVDVFDVVRGMTGVKEAEIDVDGTPIKVAVTNGLANARK  
ILDRVAEDKRRGRSSYHFIEIMACAGGCVGGGGQPIPNTLARRARRIEGLYREDRSLPLR  
KSHENPEIRALYAEFLGSPGSEKAHALLHTKYSPREQYQFSE\*

>SPBIB\_v1\_210131|ID:27163023| protein of unknown function [Uncultured spirochete bib]

MFILKIDIVLVGYTLYGAVHVPFRFRVSPGIQRTVL\*

>SPBIB\_v1\_210132|ID:27163024| PilT protein domain protein [Uncultured spirochete bib]

MTKILLDTNAYTAFMAGDQHVLSYMVDSEVVYISTIVIGELFAGFYGGDKVLQNKEELKI  
FLSKDSIKIIDVTMETAEIFGELKSALARKGRMIPLNDIWIAAHAIEYGSKLITYDEHFK  
NIDGVRIWEYLN\*

>SPBIB\_v1\_210133|ID:27163025| conserved protein of unknown function [Uncultured spirochete bib]

MKSITIHSIDPDLKKISEKSKELGLSQNRTVKAILQNALQSDNKAARKEMFSDLFGKWK  
PEERAAFEKQIIDLEELNDSWAK\*

>SPBIB\_v1\_210134|ID:27163026| exported protein of unknown function [Uncultured spirochete bib]

MVKAKKTKEKIVKQKSFIVAALALVMVALAVGVAGAQTREPLVPQKAREK\*

>SPBIB\_v1\_210135|ID:27163027| conserved protein of unknown function [Uncultured spirochete bib]

MMKPAIVYVTRTGHCRTLAEMASRIAGGRVWEIGDKERRNGFFGFIRSGRQSTFNMATPI  
EDPNADLHDIDTLILVTPIWAGKLAPPVRTWMRSHVEEVRGKRILLIASNSGGSTVRLQQ  
SFEKEFLPIDGLLSVPIQLSEEQKLEKLEAFLGKS\*

>SPBIB\_v1\_210136|ID:27163028| ABC transporter, ATP-binding protein [Uncultured spirochete bib]

MAQLKLVDTVTKKFGDVIAVNKLNLEVEKGECFSFLGSPGCGKTTTLRMIAGFEDLDEGEL  
SVDGKVFSSSFKKYYLPPEHRDFGMVFQAFVWPHLTVYDNVAFPLQIRKIPRHEIAKRV  
KMALQSTGLTHREESYPGKLSGGEQQRIALARAIANPKVMLLDEPLSNLDAKLREEMRF  
EIKDLQKKFGFTIIVYTHDQAEAMALSDRMLVMDHGIVQQVGHPLIYNKPANKFVFSFI  
GLSNFIPVNIIEGKAVIDGSNETASFEAPLELGKKAFLACRPSEVDFVEEPTGANQLPP  
AIRARVARRTYLGDIVDYKVAVGNAEIRIQKPRRVQGPIEGSLCTIRINRTLWYPLE\*

>SPBIB\_v1\_210137|ID:27163029| ABC-type Fe<sup>3+</sup> transport system permease component [Uncultured spirochete bib]

MNTGNKLSTANIVLLFSILILVVIVAVPVILIFITAFFENGKFNIAGIAKILSDPPTYQA  
LLNSLIIAAGTTLVSTTVGTFFAWLVARVDLPLKTKMKALFLVPFMLPSFIGALAWKVLL  
SPRAGYINKLLMAIFGLSKAPIDILTIGGIIAIESMYLFPFVFLQVEGSLERMDPTLEES  
ARISGANLFTITRKITLPLVMPSILAGALLVALYSLAHFGVPAILGTEKGIYNIPTKIYE  
RIYASGGSFNIRVGTILSTILVISAALILKLQDMLLKKGQYQIIAGKSMRPMVMKLRGL  
KIPLLIISILYIGITVILPTVTIFLVGGLKTYGLSFELKNMTWNNYLKIFQWKMTKDAIW  
NSLYLSLGAAFVTMLAGTMISYVIVKMKVVRGKFIQLFLGVLPSLPGTVIALGVILTWGS  
RFGINLYNTPWIIFVAYIARYMAFSIKSNSASLSQVSDSLEEASRACGATHWQSLKNIVI  
PLIKPGMISAFFLIFLALRELTTSVLLYGPTTRTIGVAIYALNEDGETVRAAALASIAL  
VIIFAGETIIRKFLARLDQAKVKVQE\*

>SPBIB\_v1\_210138|ID:27163030|potA| Spermidine/putrescine import ATP-binding protein PotA [Uncultured spirochete bib]

VADLQLSAVSKSYGTHRVLDKITFKVNSGECFTLLGSPGCGKTVILRLIAGFESPDEGEV  
SIGGHVVATAKHSLPPEERHIGVVFQDYAVWPHKTVYENIAYPLEIAKMPHEQIKSAVSD  
AIDQVNLAGLAQRYPYQLSGGQQQRVALARALVTKPDVMLLDEPLTNLDANLREEMRFEI  
KELQRKTGTTIFYVTHDQEVALAISDKMAVMDDKGIIRQIGSPDEVYERPIDAFVYQFLG  
IPNFIPVAIKSGQAFIDTDAVQGAELPLQALADFPSPQRFPGPKGKLACRPMDVILRSI  
HPETMVKAKIVRLSLLGPIVDYLLDIGGIAIRAQMOTEAAMAQDLLIEEGQECGVRFAEP  
KWFSEDGEAIR\*

>SPBIB\_v1\_210139|ID:27163031| ABC-type Fe<sup>3+</sup> transport system, periplasmic component [Uncultured spirochete bib]

MRRALLVLMALLVTGIVPVIAQPKEKLMVYTSMKEVLIGEIRDAFTKKYPNIQFDYYSAG

AGKIMAKIAAERQSGKLVVDVLWTSEIPDFYSLKKEGVLQRYESPEAKYVVSPLNDPDYE  
FTPARLGLTGITYNTNKIKTPPTQWSDLLGPA YKDGFAIANPALSGTSMVSVGMIANNLG  
WDFIQKLRANGAKMGQSGQVDDTAAGDLAACIGVDYITIDKIKLGAPLGFAYPKEMLV  
IPSPVAIFKGTPLNAAAQKFVDFLLSKEGQTHANNYTLPVRKDVPIVQGVGLVAPDEAV  
KRAMKIDYLLKLMVEKQAVIDKFTEIMQKK\*

>SPBIB\_v1\_210140|ID:27163032| exported protein of unknown function [Uncultured spirochete bib]  
MPMALGIAVLRGLEKPKPFSKRIVAGISLALISFAVMVVDIQRSIKQEDPAAAYAAILVLR  
SRRIAELAASIEAISFQFFMNRLNNTLSAYVNDAERYDISKWNTVFSQHMEGLAQTVP  
IEDAIFFAIPDPNKIPLMMDLSTRATYQPVRSIIMQKAIASGKSVWDVCMGASKSAAQ  
NVNKLVCARLITNIDTHVPLGVLLVNPDRARAVSGSSWDEDANAAPKTDYTLIDE  
NSKILVSASLSQIGLQAQAQVPGFSEHFPLNKAASPSGKYKARALSGAKATQGLFWVIYE  
RVPDRLWTLVSVILPVSVDPLPLFFRIFIIAGFAASVWLILSVLRGGEATPDQSQPPAQL  
EAIPDWFKALAPREKVVMLLLKGLSNKEIAYHLAIREQTVKNYLHGIYKKGVLGVQDRFSA  
LLLMQNAHLNIETIKDYAEKNPSEFSVSIDILA\*

>SPBIB\_v1\_210141|ID:27163033| protein of unknown function [Uncultured spirochete bib]  
MQNQNRGFRITIQFKTIQSGACFKSYGLSRYHGNGTIFQVLQMKDFLVKFIKRSPLAVGLVS  
ANAVLGAAGAAGFLPWL VVVPLFLVISGVELLLTLRSEAGAKAILAEEDRERKERDAAI  
LADVAQARKRLALLRIAEPEVKA AVERLVYAAGMYLESCAKGNERDPFAEDAVLSVTKIV  
DEYLRLADAERMGARLKSESEDFVRASEFSSEIGPSSSSNPDKPDRSATTDNDSAAQEP  
EPSLAQRMVRLLDKAAS TISERLALPLGGMEGDHAVLDAMKAREELEEE\*

>SPBIB\_v1\_210142|ID:27163034| conserved membrane protein of unknown function [Uncultured spirochete bib]  
MKRAGIVFVFLFIFGMVLQPLGALEARLVSAEIYTLGSDGKAVVQHSLVWNVSSGTMGG  
FYFQGEKAPFVWDMERCWADLPDGTRQPLEIKRAGDKWDILLARGKRTNGLSTWVLTGYT  
DLLAADMAGLTQKADGEKLFHFWAPPEWDQALDHRTVTIILPIEVSREGESGDSRERLA  
DLGFATEKQVNEKNKIDWYAADGSDGKSYLAIRFHQEKPAAYASQELQFYLSASKVEAAF  
GPLFGALAQGTGAASGGAARSTSASGSSANAGKGRSASPGASTQNFWDWQRYPLLALFLC  
GGVAVLGVLLYRKKVLGFPKAVAKAEGIAWAGDSWTPPRIVEGTYAVPGKVAEDLHPVEV  
ALLFELPLPRVAVVMIKILEDEGTARIVQEAPLRLEILKASSADPYGDIFLKAFDSEGWW  
LSGFMADFFEEALKRLQEKTWDCDIEATKAFYRKKIEEEEEAAAGAESEAAADARRRRSYW  
YPFMYVYSHPYCANLGLPKFESGSYASFMASACFSGCFSPKNLSGTAGACYSACHNAC  
HSACHQACHSACHSACHSACHSACVSGGPH\*

>SPBIB\_v1\_210143|ID:27163035| Radical SAM additional 4Fe4S-binding domain protein [Uncultured spirochete bib]  
LSLRIGRSLVGRASAFPIPGSPEGTGTDLAWIDDFWSKAGEHIFCREDDGALILPPNR  
VYKVNATAASLIAYLKRGGKVAKLKLP SAEAQRTALFFGDLASLYRGDEPVNGTVSAET  
YSFSFTRLPLVGEIALT YRCNNACRFCYAGCGLTKSLTPFLTRPARPTADYKHIIDIFA  
DEAQIPFFSFTGGEPTLRSDLEELIAYAQQK KLITNLVTNGTLIDAARAHALKEAGLGS  
QVSIEGPSADIHDNLAGRPGAFTETLAGIKALQEAKIPTQTNTTITRANLAVIHQMPAYL  
ASIGIHRFAMNLFIP TILGEEADRLFVSYEEIGPYVDAVAKEAKKLGMTFFWYSPTPCFN  
YNPIARGHGNKSCAAADGLLSVAPDGSVLPCSSWDEPIGNLFSQSFRDLWFSEAARFYKE  
KRFAPAPCTSCSFVACQGACPLYWRYTHSEPSGFKKT\*

>SPBIB\_v1\_210144|ID:27163036| membrane protein of unknown function [Uncultured spirochete bib]  
MNPVTVQYRIRGLSTEARLILFGAASLCGILLQVFWPVAGPLVGTLLLLLPLFLLSAQPW  
SNKPKDKGEEDWQPVGDAELDRIADAFKSAREIKIPLWYRPGFGIPFTVALAILTSIFGT  
GLTLPGLLAMDALILFWPALNFLKIKIWPKEFEMVMQAIQAARSVPLPDGILCTPYLRL  
DRDDQGLRIPENARLML EPRRKPEDLVGAQLQVAINKGPNPVPYLYAVVLTHGKGQSWQ  
KARSLRIPGFEVEPGGDADYGTVVIRQSTDRGGYHTKPEDCRRLVQVVVQVLKEL\*

>SPBIB\_v1\_210145|ID:27163037| Cell wall-associated hydrolase (Invasion-associated protein) (modular protein)  
[Uncultured spirochete bib]  
VKGEDAGLLYPRSCVPNYLIVPKIVMKVLASLA AKSIDALRLAALGIAVCLFASSCSIFI  
SYEIVPASVEIRTAIRYAQKYAELGAVYEWGGQDPLPRKIAVDCSGLVIRCYEYACGDY  
GASLLFKDTTAKGLRQYSSLIASPEKGD LIMIGDNNEISHVALFTRKEDGRLYFIDATSL  
TGMVSMRSYAENDPKFIEFRRMNVINKK\*

>SPBIB\_v1\_210146|ID:27163038| exported protein of unknown function [Uncultured spirochete bib]  
MRLPSKPESLFWAILAMVMLLTACTMNNEDDIWTWGNYPELGTGPVEFKVVPLEDGTFN

EITPMGHMNLPHIPTSAGGFSFLSNGYSQPVKAPADGVITAIRYTHVFNVDGTKSFPD  
YAVRIYHTNTFITWYDHLAIDDTILAKTGLAEGWTKAYVPVKAGDVFGKTAASSEQVT  
GLGMYAYDKEKTLDFINPEKYGPFGAHAVFAFDYFRNDIKTQLFAYIKRTAEPGGKIDF  
DVAGTLSGNWIVEGSNVISSPNPWNWYLSFSYDMYYPESRRISIGVELGTTIGKSNGLT  
QPVEGPDYTAARTGSDPVRYKLADAMEGLSSLPATSDIKYTLAQQVVEENKIKVELFDGN  
IDNPSFTENAKYYTR\*

>SPBIB\_v1\_210147|ID:27163039| Fe-S oxidoreductase [Uncultured spirochete bib]  
MDGLKKVFAKRAVNLTLYLEGDPQENLSKAVNALMPLAKRDGIKQLESQAKQIMAEKDN  
PYRNILRVFHEIAPNVRRRFVTNFVNASMIGPDRAQMLKYKHDCNIPWAILMDPTSAC  
NLHCKGCWAAEYNKTDSDMDYALLDRIIREGKELGVYFYIYSGGEPTIRKNDLIKLAQVHN  
DCMFLAFTNGTLVDQDFALALGEVGNFALAFSIEGFEEATDFRRGAGTYTKVIEAMQYMK  
QIGAPFGFSAVYHGKNTREQVGNEAFLDFLIEQGCMEFGWYFTYIPLGKDADTALIASPSQR  
EYMFHWVREMRDCKPIFLDFWNDGQYVDGCIAGGRSYLHINSAGDVEPCAFIHYSNVNI  
RNVSLLEALKSPLFKQYKELQPFKNHLRPCPLLDNPEALSAMVKASGAHSTQPIDKEDV  
DELTAKEKAKEWAPVADGLWAEELPEYSKAKARREERKTQE QIMKQLKTMRPLKTK  
EDKKKIFSLRL\*

>SPBIB\_v1\_210148|ID:27163040| protein of unknown function [Uncultured spirochete bib]  
MPKIVDHDNRKREILEKALELFSLGGFHASSFAEIAESCGLSRTNMYNYFKSKEEIFFYA  
VEDIFNRISVEIDRIARQKNVSIVRKLSSIYEIFTDNSAIGRYSFIITELAQKLNENAE  
FLAKLQEAALKRQKIESLLYREGNPILAPQVPVIATLFFSLVESSISHSLFIDKGFION  
NIASLLNLESFV\*

>SPBIB\_v1\_210149|ID:27163041| conserved membrane protein of unknown function [Uncultured spirochete bib]  
MQRNLLFAAVFAIAMAYLEAAIVVDLRKLYGITDIMASLSSFDAQISRIEIGREAAATLV  
MLWALGWIAAGKQLQRIGFFIFAFGVWDIFYYIWLHIFIGWPHSLLDWDLFLIPLPWWG  
PILSPVLIALIMAIIGVQLVSEARGIAIQPKTAEWLLLVSGLAMLYAFMADALAVRHL  
NLEMLGMLRPSSFQWPIFLVGFILSVASCGKFLAAVKSDDKAGGRITT\*

>SPBIB\_v1\_210150|ID:27163042| conserved protein of unknown function [Uncultured spirochete bib]  
MMLQKETKTDDTEAFCLVLGGGGAKGVYHIGVWRALKKLGIVDCFIGTSIGAVIAAFLA  
QGSDEILEQIGHIISLDNLDLPEDFIKNGELKFNLQSLRSLPDDFISVINNRGLDTKPF  
RQLIESNLDEKALRNSGKDFGVVTINVSCLKHQEVFIEDMEQGSVVDYLLASSAFPGFKN  
PKIEGKSFIDGGIYDNIPYAMARKRGYRRIIVSDLSGMGRTRKPDIAGCITVYIKNSIDM  
GWVLDLNRNFLDSFMLLGYLDTLRTFGHLAGYSYFIEFDTNAEKNFAPKISIPFSQSPKY  
MCYDRRKLIALECAASVLNVERIRTYTYAELRTAIAEHRYEVENKIAAATASSRKGIMN  
LAKVVSEAVATRQFTECPYYYYCLVNKLFPKSTARILKNTLVRIFPELPVGAAFIEGMES  
DSLNF\*

>SPBIB\_v1\_210151|ID:27163043| putative Phospholipid/glycerol acyltransferase [Uncultured spirochete bib]  
MSFDVVHTEKRIAQSAGVSGPRNAEDYDPEKELDANRYALIVQQSKVPIIALFNAAVKED  
TSFLLPLMLLATIRTMRRIPRTFFIRNGPEYERYVFKTIHWWARRICRIGRIRLQVSGAE  
KIRPDRAYLTVSNHRSPADIPVLFDAIPQNAAFVANGMFRMIPAFSFWMRASGTVFIEQG  
NQKAELAAFKTMIRRLKQGRSLILFPEGHTHQGPGIDTFSRGGIYAAVLAGVPIVPVCLS  
GTDKVIKPGSLHINRRSRVIVEFGAPIETRHLMGMAAKKNIDTILHDTIAGMLDRQTSKQG  
GRPRQA\*

>SPBIB\_v1\_210152|ID:27163044| GtrA family protein [Uncultured spirochete bib]  
MNAARVIAGFAKAQVSAFLGGIVDYSVMILFVQLFHIHYAIGIAGGIVGAAVNFAINRY  
WSFYSPKGRYSDPVTVQGMKFPVCMASIAMKATGTYWLVQAVSLDYRISRLAVDAIISL  
AFNYQMQRWVFKKVRSEKKH\*

>SPBIB\_v1\_210153|ID:27163045| conserved membrane protein of unknown function [Uncultured spirochete bib]  
MKRPIHSVTEILDIAIAQGRQRTNLLRKYEQRFIAFLVRFIPSWVSSNMLTAVGFLGNVLV  
FLSFVLAAKISGYWFLGLIAGFAISWFGDSLGRYAYRNKPRKWKYGFALDIAVDWLGIV  
LIGLGFILYANGYLKIVGYAFITFYGLEIIIALMRYKITGNYSIDAGLLGPTARIAISL  
FLIEIVFKGTLQYMALVAVAVLISSFSELKLLDAADAQDREKRAQDRESKNIVELK  
RAEKR\*

>SPBIB\_v1\_210154|ID:27163046| transposase [Uncultured spirochete bib]  
MAITKEVLDELLKEYKGPEDLTGPEGLLQKLTALIERAMDAEITTHLGYEKHDQSEKDT

TNRRNGRTKKTVRSDQGPLEIEIPRDREGTFEPAIVPKHQREFKGFDDKILSMYSRGM  
REITEHLKEIYGTEISPELVSRVTDEVKELLEAWRARSLETSYPIVFLDALMINVREDGK  
VVKKSIMYALAINWEGRKELLGLWIDQAEGAKFWMRVLSELKNRGLQDILIAVVDGLSGF  
PEAIATIFPKTEIQLCIVHMVRNSLKFPYKDRKAVAADLKALYASPSEEAAALDIFA  
AKWDSRPFMISRWRMRWPEVVTYFKFPEMIRKAIYTTNAIESLNYTVRKVTRNRLSFP  
AEAAMKLVFMAQNISKKWTMPIHEWKSALGQFIIFYGDRVPL\*

>SPBIB\_v1\_210155|ID:27163047| Phosphoglycerate dehydrogenase [Uncultured spirochete bib]  
MSKRVLITSRSFGQVSEEPNIFKENGIEVDFQNDYNEEKFSIIGNYDALIIGAHEFS  
PKAMEKAKKLIICKKHGAGLDNINLEAAKKYNIRVTNPATNSNAVADLAFGLMLDVARK  
ISFAASRVKDGLWERVIGTDVCYKTLGVIGFGAIAKNVAKRAGGFGMKVLAYDPYVTDLP  
DGFPHVSLVTFEDVIKQSDFISVHVPLNDATRNLIGREQMEMMKGAFIINTSRGGIVNE  
EALYEYLKNGHLAGAGLDVTEKEPPTGSPLLTLDNVTVPHIGMYSKEAINAVSVICARN  
VVKMLNNEQPDIHV\*

>SPBIB\_v1\_210156|ID:27163048| conserved protein of unknown function [Uncultured spirochete bib]  
MYNIYFDSGTSNTRVYLLKDEEMVDVAQKNVGSKDSSIAGSNQVLLQGLKELYDRILDNN  
GLNDAQIEGVYASGMVTSFPGIKEVPHLSTPITVEKLYSSMYTHYEGEFFKRDIHLIRGA  
KTIAEGFKVDKYNISVANMRGEEIEVFGILSDLSDEWKRGNATIFLPGSHTHIVYVKQG  
IFHDILSTFSGELFHAISTSTILSSISSEVDQLDEEMVIQGYRNLNEYSLNALYIAHA  
MKIFNASNKIERKSYLEGVINGGVVLGFENTVKKRWKEVDRVIIASSSNIKAVYEILLKE  
LERKFEILTLVASGKESFAVKGFIEILKGGVLCQKECL\*

>SPBIB\_v1\_210157|ID:27163049| putative 2-dehydro-3-deoxy-6-phosphogalactonate aldolase [Uncultured spirochete bib]  
MASNIKDEIFKGGKIVAIIRGIGSDRILDTVGALLEGGIKLEVTFNQEDESALDITLKL  
ELIKSKYDQVCLGAGTVITEDQVQKAVDAGAEYIISPNTDINIIRRTKELGKISIPGAF  
TPSEMVAAYNAGADIVKLFPAJILGIEYIKAVLSPLSHIPVVAVGGINVDNVNQFIKAGA  
KGVGVGGNLVDKKAISGEYHKITLVAQTYLKKLEES\*

>SPBIB\_v1\_210158|ID:27163050| Putative KHG/KDPG aldolase [Includes: 4-hydroxy-2-oxoglutarate aldolase ; 2-dehydro-3-deoxy-phosphogluconate aldolase] (modular protein) [Uncultured spirochete bib]  
MQNLKELFFATGVIPVIKIESAERADGLAGALRAGGLRVAEITFRTKAAAGVIEKFASRH  
PDIVVGAGTVTTKTEVDSALSSGAKFIVSPGFNPEICAYCIEKKIPVFPVSNPSLIEQA  
MSLGLTILKFFPAEVSOGTKALKAFESVYQAVTFIPTGGIQENNLNEYLTIKNVLACGGS  
WIVPTDLIEAGKFDALIALIQSCRRSMLGFLPLTSEMKLDNASGADADRLSSPVLELKT  
SIRRTLAMLGMNEETSSSAKSIIISLGDTRIRIIE\*

>SPBIB\_v1\_210159|ID:27163051| conserved protein of unknown function [Uncultured spirochete bib]  
MDVIKELLEGIPLPKMVKVKMAFSAKKVADVEAAVRQELAKPGICDSIKPGMHIAVGVGS  
RGLANLPTLVQVLVDELKKGAVPFVVPAMGSHGGATAEGQTEVLANLGVTEASAGCPV  
SSMEVVEIGRLDNLPLVYIDKNACADGIVFIARVKPHTAFRGPNESGLVKMVAIGLGKQ  
KGAESCHSYGFKYMAEHIVAMTKIALARTPILFGLATVENAYDEIARIVAVPAADIIETD  
CKLQVEAKANMPSLMFKQIDVLIVDQIGKDISGDGMDPNITGRFPTPYASGGPDVSKLVV  
LDLTDKTHGNANGMGLADFGTHRLANKVNFQMTYANGLTSTVVLPTHMPTILES DYDAIR  
AAIKTCNARDYSRVRVVRKIDTLHLGEIMISEAMLAEARTIAGITVVGEPQAMKFDAAGN  
LVREED\*

>SPBIB\_v1\_210160|ID:27163052| conserved membrane protein of unknown function [Uncultured spirochete bib]  
MKLELVTEIGILAFGIATLVQSFHIRILKFGGSMGGDVFPKALSIVLIILSAIVFIIDL  
KYLQNKYLKKTASATEGASVVKSAKERGYLNVLFFTVLFAIDIFSIRYIGFVMAMIPLI  
FANYLLQKKEIRKTDWLIALVYAVGVTVAFWALFEKVFEVMLPQGIWF\*

>SPBIB\_v1\_210161|ID:27163053| conserved exported protein of unknown function [Uncultured spirochete bib]  
MKKIALSMVAFLVMFSAFFVAISPAAYDPKPVTVVVPYSPGGASDITARLLAEYWKY  
GKEMVVTNVVGAEGAVARQVLNTKADGYTVLWYHQAILGNYYLGVADISWKDLTPACVV  
MKTSRVTVTRNSSPWKNLREALDDAKKNPKKYIYGAGAGGIALEYGPLEMDAPGAFRVV  
PNEGGAQRIAALLGNHVDAIPVALISVVQYLKSGDIKCLALHDVESDPFIPDVPTASSQ  
NIKNLVFPMTNTFFFPKNTSQNIVNDFNGIIAKIVVDPEFKKKLADMAYTVPFKTKGDL  
EKFWSDQDSVYKEVAKYVK\*

>SPBIB\_v1\_210162|ID:27163054| conserved membrane protein of unknown function [Uncultured spirochete bib]

MDAFLQVFTFGMHVTFQPLNLVIAIGTLWGMIFGAIPGLTATMGVAIALPFTYKMDTAS  
SLALLSSIYIGAISSGGFISAGLLNMPGTPSSIATTFDANPMVKQKASLAMSLSLASSFA  
GGILAVFIAIVATYGLAQVALKFGPFEYFSVGLLAFAGCVGMFGDKLFKSIISLVLGLVL  
AMIGSDVLTGVNRLTFGIPNLAAGIDILPLLMGLFGMSEILFALDNKESNVVPPDARNNL  
MGWKSFFSAFKLIISRSHIFNFIRSFIIIGFAIGVFPVGGATSSVVAYGVAKSTSKHPEK  
FGTGIPDGIASETANNATIAGALVPLLGLGIPGDSVTAVMIGGFIIHGLFPGPLLFREN  
PQPVIYVIFASQIIANLVMVLLGVFLMKFLIRTLSEIKSHILLPVITAAMIIGSFALYNRVF  
DIGVTLVFGFVGYIFKKIDFPTVPLITSFILGPIVEKNLRQGLASSGGSLPLFTRPLSL  
GLLIGAVILFAIGMYVSFFAAKRVESQK\*

>SPBIB\_v1\_210163|ID:27163055| conserved protein of unknown function [Uncultured spirochete bib]  
VVVFFETVGAANVAAAPKPITFKFAIIDDESSSHYRGAKKISLEMAAAIKTQINIEIANS  
GALSGETVVEIAMSCVIDITTADNFVLTGTFMCCMS\*

>SPBIB\_v1\_210164|ID:27163056| conserved protein of unknown function [Uncultured spirochete bib]  
MNKPVSLLEFAYEKIKEDIMHGKYTPGEKLNIGEIAKDFNISCTPVKEALNRLASEGFIE  
AIPRHGMMLKVLVSKDIEDMLNVRKMIEMYSAKLAAANVQKHPEIIRMKKLLPLMEALG  
DHEYVEATKLEQYHGLFVVKLTENNRLIEMYEKLFVGSFAFYVYSIGNFPLARASEASRE  
HMQMYNYLLEAKGDELSELMGRHMQATIELLEDLISKDTEHRFKIN\*

>SPBIB\_v1\_210165|ID:27163057| conserved protein of unknown function [Uncultured spirochete bib]  
MSVLILETSTSSAKALLYDEIKGIVSTKIIPYNKEKNSIAMQDCDDVCRSVLEAGRQIAF  
SQDVEAIALCGTWHISIVVCDRSMKPVSPSYSWAYTDSMPEIANIRKDHRLTDLYHRTGC  
MVHSTYGFYTLMLKNSGMEFRDKLFASQAGYIFYTMTGERVESSTMAGTSLLNHVKQ  
YDPFILSMLGLDAEQFGRVLYTYRDTFPLKNIADALGVKPGIPVVPAYPDGAMNQVGS  
LEYGIMTMSVGTSAALRFTVDKPMIPEEPSTWCYVGVDSWVSGAAISGAGSCVDWLRSSV  
FNGNMSFKTLESAAASQESTPVFLPFVFGERSPGWQDDRLGGFFDVRPQHGYGSMYRGLL  
EGICFNLRQCYSLTISIAGEPKEIRLSGGIINSPFWTQMLSDVLGRELIVSRFDQASSLG  
SVALALFALGKLAKLSDFKVDSTYTKVLPRESQEYKNKYERYLYWYNLTR\*

>SPBIB\_v1\_210166|ID:27163058| Phosphoglycerate dehydrogenase [Uncultured spirochete bib]  
MFNIIVTARSFGQANPEPIRLLENGCRIEKLNMNPLSASELLALVAEADGIIAGLDQY  
DALVIENAKRLKVISRYGVGYDNVDLEAAKRKGVAVTFTPGTNENSVADLAMTLLLCASR  
NIVSMDKYVKSGLGSRVIGSEMWKKTGLIIGTGRIGKGLARRAVGFSMNILAYDAYPDTA  
FAQQVGLTYCSLDRLRESDFISIHCPDTETRSLIGAAEFVAVMKPTAVLVNTARGGIVD  
EEALYNALVQKKIAAAALDVTVQDPPTGSPLLGLDNCIITPHIGGYTRDAVLNMGMLAAR  
NLIAVLKGEPCFRVV\*

>SPBIB\_v1\_210167|ID:27163059| protein of unknown function [Uncultured spirochete bib]  
MRTARHGPNMSPITHVVNIHVDLAAQNVSIQEWSGTEPRNLVIQGLKEPKHVLLVIFLG  
IAEYSNGYVCANEKLG\*

>SPBIB\_v1\_210168|ID:27163060|rhIE| ATP-dependent RNA helicase RhIE [Uncultured spirochete bib]  
VNFSSFSFDGTITKAIDRAGYTDATPIQAQAIGPILEGKDVGLAQGTGTGKTAALFALPML  
QRLLTGKRCTARALILSPTRELAEQTRKAFEALGKETNLYALSIYGGVSTSAQIRSLKRD  
MPEILVACPGRLDLMGQRVVSLLKDIEMLVLEADQMFDMGFLPSIRQIEALPTGHQTL  
MFSATLPSEIRSLAREFQKDPVRIEIGNSRPVETVNHIVYPVMQADKYAVLASILQENAT  
GQALIFTKTKHRAQKLATQLLDAGHSAAALHGNLSQGQRDKAMLFRTGKARIMVATDIA  
ARGIDISGISHVINFDMPDTAEAYTHRIGRTGRMMHSGIALTLATPDDRSMLKIIERLIG  
KPIEHKIVSLAEIDVTASIEEHQKVAWNQRGSYRLEHGERSDRRPDTHEARPGMHTNRPE  
ARKSRPDSRGLKPFKQSGAQNGVSHGKTHDAAHNAVHFRDTRNSAPNAALRSRDSRNAI  
RSAAPRSGGRYPKEYASIP\*

>SPBIB\_v1\_210169|ID:27163061| conserved membrane protein of unknown function [Uncultured spirochete bib]  
MPYCPDCGVEIGNAPRCPLCGSPNPKAVPDAQNPCKDADITGKHPAANIIFEGGEGIFSK  
EEKRTVLWEVLSVAFIAIVVLGAVNLFESRRLSWSLYPVVSILLWVEATAFLVLKNMQ  
VLRIVLGAIAAPPALLALGFVSGSPRWAFLAIPAVLVESLTGALVLAIGKSKRKGLNL  
VAYVLAVALCIGLEMFIDLFARGVVVFDWAPICAIALLPIAGFLLYLHYRVVKATNLR  
RLFHL\*

>SPBIB\_v1\_210170|ID:27163062| Elongation domain-containing protein [Uncultured spirochete bib]  
MHIWARRSREQQFIHTRREDEQGEWYALDAAIIMPAVANEITSLFRFEAELDAPIDVD

VMGKALELTVRRMPYFNVRLRRGFFWYYFEPCHTLPHLYPDSPPSPSQLWDINKRGTRMFR  
IRCEANRVAGEFSHALTDGTGGMTFLKTLANYFLLKGIAPGAELSEGEFRDILTSQSFI  
ESPSIPSDEFEDAYQRYFPKGLPFPDTGPNAFHMKFKCLPKGQYRVISGELNLTEALGEA  
RRHGASLTELMATAVYLDALQQIWHETVPRPKEHYIAVEVPLNLRMTMFPSKTFRNFSFLV  
IAEDMRLGMRSFEELVMRTHYQMKLEYDRMSIAKHLRSNAGSARNPVVRAVPLFIKDIFA  
RIFFAKFGESMLSGFISNLGQVKMPPGFTPHIQRFQGFIPAPSLTTLTNASMLSWGDKLIV  
DFGSLTESRELERLFFRRLRSLGLQVRVSCRLDQAEAKAQSKEEPNAILS\*

>SPBIB\_v1\_210171|ID:27163063| conserved membrane protein of unknown function [Uncultured spirochete bib]

MIATFINAAAVIVGSLIGLLIRKGIKEEYRKVVFTAAGLTSLTIGIQMALKTSHILSFAL  
ALMIGGLLGTLLDVEGGIERFGERLKQRFASKSEGAFAGFLNASILFCAGAMAIVGSFR  
AGTEGNYSLIFTKSVLDGFVSIIFAGAMGIGVAFSALSILVYQGALTLLSVYIKPYVSDL  
MLAEITGIGGALVIMIGFGLLEIKSFKTGNFLPALIIIVLVLVMPVLKFL\*

>SPBIB\_v1\_210172|ID:27163064| conserved exported protein of unknown function [Uncultured spirochete bib]

MNRRIFRAFALITLALLVSIFASCASSPPPAPPDASAQKIIQLAQERYDAYDLNGAQYYY  
QVLLERYGSDPEYMLNAKYEMAFIEYKKGNTKAIAGFKEVIARYDAPDGQTLSQTWKVL  
SEKLLAKLTGGK\*

>SPBIB\_v1\_210173|ID:27163065| conserved protein of unknown function [Uncultured spirochete bib]

VRRFRCTRCGKSFSTQTYSTHYLKRIVSYRDVLYRLAGGESLRGMSRALGCSLSLLTNR  
IDRLARQGIALHARMLRARRGKEDICIDGFVSFDCSQYFPNEIPIAVGRTSGFVLDVSHC  
TRKRSRSMRQDXKAKAALYSTIRLERGGIXRSFREVLAATSLAVQPPQPXXPFVLITDEK  
PDYARLVKLAAYWGEGXGRLVHLXISSHXPRTIHNPLFSSNYTDRELKDLANHHRESV  
CFNRNVANGMLRLWAYLMWHNYLKPYRIRWPKGRPXTHAEASGIDATXLEXVYRSFFEE  
RAFLTRSPXLMARSWKKEWRTPGKEKAHEYIPRLALG\*

>SPBIB\_v1\_210174|ID:27163066| ABC transporter related protein [Uncultured spirochete bib]

MAFIQLSGVALSFGARDIIRDATLNLQAGSRAALTGPNGAGKSTLMKIAAGLLKPDAGDV  
IISKGARVVYLPQTGIRFEYGTVHDIAEEGFRFFRNLVEEQERIGRQLESSGLSEKETAR  
LLDQHHEIGETLENAGYWRREEKIADVLRGLDFKHRDFDRPAAELSGGWQMLALARILL  
EDPDIMLLDEPTNYLDLEARTWLENFLKDYRGAVLVVSHDRYFLDVTVREYELFSGLT  
RYAGTYSQYEARRSQELALFEAWERQQEEIQRIEDFIRRFYKESKAPQVQSRIKMLEK  
ITPIEPEGMKRIHFSFPPAPRSGQVVVRIRDLKAYGNQLVIGAFSLEVERGQKLALVG  
PNGAGKSTLMRLISGSDPYLTGSISLGANVQIGYFSQESAELMESSATVEEEAASVCPD  
MLPKLRNLLGAFLFRDDDIEKPIVLSGGERSRLALLKLLKPSNLLVLDEPTNHLDLTS  
KDILLEALKKYEGTVIFVSHDRQFLDELADRVLLESCGTSPLRYHGNAYYLEKKAQEAA  
GETLSQSASFSPVENVGQNSPPVTDWENKARKAHLRKLKRREEEISTRIGAIAAEKQQL  
QEQLAHPATYMNGEKTRATLASIEALEQEAENLNEEWMEIAEMLSAEES\*

>SPBIB\_v1\_210175|ID:27163067| protein of unknown function [Uncultured spirochete bib]

MSLNSNENMHAARFLLIGLVLALVFSTLGIGCARLEGWGVVIWSVKGTTAKAGAVVPVYL  
KSNISKTYVIGLPDDSKAKIEVPLSTLEFFSSKNAAEKRAKEFAPFASLYLSAGRDGLPV  
REKPSVSTRRVYRLRLGESVVKVLSRVDGEAVFTGGRALPGEWYFVQATDGTGRGYVFSNTM  
VLYEEKENAAAPVIGTSPAPSAALLDMIYAQPWRPAYYQLMLDDDAVDPDLFALQYGLFA  
DAKNSQVRIELPGYSSVFRFSSVSQGGDWLIFEGSKLRVRFENESTIVADWSGTDSVLPD  
EGWGSNAQSARFIKLDTSIPVVLSENSRRDSELKAFFQRSAMAQSNATSASTSTSTITF  
LSDLAGILSIDARGTFEWSHTDQLPAGFAPEILAGSAGAAIPGAPATGAPTTAGPASNAP  
ASSAATASVPIKGIKIRFGLHLGTSLSA WMGGFSLLVGDKPDREDYVYRFENGQLVIKA  
SPVTLRGTTESLDSRFSFVNYL VVK\*

>SPBIB\_v1\_210176|ID:27163068| Ppx/GppA phosphatase [Uncultured spirochete bib]

MSDTQPKDTARASTQTPRLHAAIEIGSTGIRLIVAELDAKGLRILDRASKQSRLGRDVF  
TMGSISRDLRETIAILGSESELLQGYGLKPDIIQVIGTSALREANRDTFIDRVNLQTG  
FHVRIVEDIEENHLMYLA VQKALQDERSFLSRANAMILEVGGGTTEVMLLKKGQMVSSHS  
LSIGTLRMDEQIRESARQPREFIEMYLESNIKTACDVLAEPLDSVRTFVLIGSDARFA  
AYCLSGKNFDHYAVLDRNQFVEFADSVASMSLQECMAQYHLSWSEAEGYAAGLTIERMFL  
EKTGADIVIVPNVSIREGILLAQVQGMQKIEQELRRQVVASARSLAKRFHYDEDHATHV  
KNLSLELFDALKKEHGLGKHERMLLEVAAILHDIGTYLRTSGHHKHGEYIVANSEIFGLN  
REDINIVSNVRYHRKSPPLATHVNYIALPREARIVVLKLAAILRVADALDRSHSGRVRE

LSFERTEDRFLMRPSQSLDFSLEKLSLAEKGDMFEDVFGLLPVLI\*

>SPBIB\_v1\_210177|ID:27163069|ppk| Polyphosphate kinase [Uncultured spirochete bib]  
MNKLPMLNRELSWLDYNARVLAEGLKPSTPLLEKLNFMRI FASNLD E FFMV R VAAVKSAL  
LNKQTSEEWAGMHPDLLDAIHQKVQQYDTLYAHLHEIVLPGLAANAHLSSQDAWSSR  
EWRYLERFFAEKVYPLLTPLRLEPDYFYPSTGSLQVHVAFRLEGEQSIAIVQVPKNIDRFI  
ILPQDLTIAAEPEAGQPQGNVLRALLEDEVLAFGSKLFSGLKVQHGLIFKVN RDADFSV  
DEDRDDDFLAAMEEVL TGRQNSTPVRM VYTGSDQILVDALMRSALGPLDVYHVDWLLDL  
GRTTALCDPEFYRGHGLVPAPSLFFSQWKPVRSFDEKGSIFDWIDEHDFVNL PYESFDV  
VQRFIEESANDPSVLGKITLYRTSGMGSPIVHALAKAARSGKQVVVVLEL KARFDEEKN  
ISWATELEQAGAI VTYGVARLKVHAKAALVIRRRQDGS IARYLHLSTGNYNEKTARSYVD  
FCLFTAHESLCTDVALFFNILTGYSSIQSLSFIAVAPFDLKQRIIALIDREASQSTPESP  
GLIIAKLNALSDPDIKALYNASAKGVQIMLNVRGVCTLIPGLPGISEHIEVRSVLGRYL  
EHGRMLYFRNAGSEELYLSSADWLSRNMEKRIELFPVLDAELRARCKDILMAYFKDNTH  
SYRQDQLGEWEDLSQTGTGGEARLCVQERLYKLAKKALHSREEKEEILQVRRSKSATAAP  
ASKNPGD\*

>SPBIB\_v1\_210178|ID:27163070|nagD| Ribonucleotide monophosphatase NagD [Uncultured spirochete bib]  
MKATEETLKNIRKKQAFIIDMDGVIYHGNVLLPGAAQFVDWLRRQKKRFLFTNSSERSP  
EELSQKMARLGIDVGP GHFYSSALATAAFLANQKPNGSAYVIGEPGLIHALYRVGYTMNN  
INPDYVVVGEASSYNLDTLIKAVRLVIGGAKLIGTNPDLTGPGEGGLVPACGALVAPIEL  
ATGRKAYFVGKPNPLMMRHARTLGATREETVIIGDRMDTDIIAGIESQIETVVLVTGVT  
ARQDLPKYAYAPDHVLEGIFEIPEAIEHTPDEAAAGKM\*

>SPBIB\_v1\_210179|ID:27163071| Alpha amylase catalytic region [Uncultured spirochete bib]  
MISSETDAIYQIYLRNFTKEGTFRAAIPQLAHIASMGFTWVYLTPIHIPIGKEARKGLLGSP  
YAIYDYRAINPELGTLDVFEAFVEAAHANELKVMIDVVYNHTSPDSVLAREHPEWFLKGP  
DGKPARCEDWSDVDFDYSASPHLWVELISTLAMWRDRGVDGFRCDVASLVPAEFWKQA  
RTRVNQYDPGVRKELRPLVWLAESVHPAFLRRMRSEGYGAWSEPELHAAAFDLTYDYDGW  
ERLEVKKFKKRGQTPIFKYFEYLYAQETLYPKGAKKLRFLNHDQERAASRFGRGDMLKA  
WTVLYQFLPGVALTYMGQELALEHRPSL FERDPIEPSGGDPHFEQFFVSSLKATTEAKRD  
APFFSWSIFDDDVVFC LRSTAPAREATPIEEAMVKS GNYLLIARAGGGGRGQTSRAARLL  
APFDIHGTELLSGEPVNYPRGSDIPSPALLVRLGN\*

>SPBIB\_v1\_210180|ID:27163072| exported protein of unknown function [Uncultured spirochete bib]  
MNKGIYDKNSGPAHNIAVASLAMAAIWLITPLRPAVSANEQKTAMLA WGGDLVVQTVYGG  
RIAEPSPRGTRKK\*

>SPBIB\_v1\_210181|ID:27163073| conserved protein of unknown function [Uncultured spirochete bib]  
MSDAKSPSFAENRPLDTETTPFPGGPRAPETDFDDAFAAAAARDYRMLLDKEYPVDASLK  
LVGDRYRLSHNGRMMLYRGILSRSASQINLAKLVRASWEGAELGIDGYNVLF TLTNYLHG  
HPMFIATDGFLRDVGGAHGRIADHRGFERMAEVVAEMLSQLNLSKVTFFLDAPVSSSGKQ  
AAFLREAFARCAVNAEVRL ENGVDHFLACWEGELIATADSAIIARTSAHVFDLARYILER  
QFNAHFPPPLASLIA\*

>SPBIB\_v1\_210182|ID:27163074|plpC| Outer membrane lipoprotein 3 [Uncultured spirochete bib]  
MKGSWMKGTKVSGKAAA AVKRAPSLGRTLIAFAFLALFVASGFAQTGGKLVTLKVGATPI  
PHGDLLQLVKPDLEAQGIKLEIVELTDYVTPNILLA EKQLDANFFQHLPYLNDFCADRKL  
QLESAGQVFVAPLGLYSRKYKKLEDIPAGSVITLPNDPTNEARALILLENKGLIKINPKA  
GLKATIRDIAENPKRIVFREIEAPQLPRTLDDAAA IINGTWAMQSGFIPARDSLILEGA  
ESPYANIVAVRKGDANDPRVVALVKALQTQKVVDYLISKYNGSFVPAF\*

>SPBIB\_v1\_210183|ID:27163075|metI| DL-methionine transporter subunit ; membrane component protein of ABC superfamily [Uncultured spirochete bib]

MNEALSLLAKPLGETLLMIAASTLIAGILGGLVGIFLALSNDRFAGKHRGARFAKRLAD  
RAINMLRSFPYIILMVLVLPLSRLIVGTS LGTLAAIVPLSVA AIPFLARIVESALSEVDS  
GVIDA AISCAASKTRILFAILPEALPSLVSGTLT MISLLGYSAMAGVIGGGGLGD LAI  
RYGYQRFRGDVMAVAVVTIILVELIQFSGTAIARSIRAKR\*

>SPBIB\_v1\_210184|ID:27163076| DL-methionine transporter subunit ; ATP-binding component of ABC superfamily (fragment) [Uncultured spirochete bib]

MFHAGRPEEAANQALIAHPPYQAPLAGDRTPMPGAVFQDIPVSASIFPRTALRLDAISKA



FGSHTVLDEISLNPVKGQIHGIIKSGAGKTTLIRIAGLLDKPDRGSVFFEGINAPVHEL  
RGQELLEARRKVGFIQSFNLFASRTAGENIAFFLEAAGWPSAKIRARVQELLDLVLGLAD  
KADRPSSRLSGGEKQRVAIARALANHPSILLSDEATSALDPETTRSVLDLIRNLRDMLGL  
TVVMVTHQMEVRRICDSVSVIASGSIVEEGLVSEIFAHPRSAAKAFLKEGQHE\*

>SPBIB\_v1\_210185|ID:27163077| putative Positive regulator of sigma(E) RseC/MucC [Uncultured spirochete bib]  
MKEAATVTKIDGMVTIAVKMQEGCGVCGNNGTCKIRMSNLLAYNKNHISIKEGENVIVE  
VPSVEQAKSAFWVLGLPLIMLFVGYGVGALVFRAPTEGPAVASAGAGFVLALLVGMMVQR  
RKRLESFPYILAKEGEGLY\*

>SPBIB\_v1\_210186|ID:27163078| Phosphoesterase family protein [Uncultured spirochete bib]  
VAITIVFFGEIVGKTGVFTVKSTMAEIRRRFQPDFVLANADSATGGAGLGIQHAVYLRKL  
GIDCITMGEAAYYKPDMEFYKAGWVLRPANLPEGDPGRGWKIFQKEGKIAVVALLGQ  
SGFARVHADNPFPAVDQLSHILHRETSCIVVNFHAATTAEKLSLARHADGKVSALLGTGG  
KVLTA DARILPKKTAITDLGRIGSILSVGGFDPEVKVKEFLTGVPAWGDASAQPEAQG  
VCIRFDDEGVALSIESFRIQGKEIVDEGSSDSNQN\*

>SPBIB\_v1\_210187|ID:27163079| CMP/dCMP deaminase, zinc-binding protein [Uncultured spirochete bib]  
VSDYRRPTWDEYFMEVANAIKCRATCDRGRSGCVIAKDNQILATGYVGAPAGLPHCDDVG  
HQMCKMLHEDGTITEHCVRTVHAEQNAICQAAKRGVAINGATLYCRMTPCRTCAMLIINC  
GIVRVVAEYRYHDAAESEEMFKMAGIKLEYVHNEVLKYDRQ\*

>SPBIB\_v1\_210188|ID:27163080| Peptidyl-prolyl cis-trans isomerase [Uncultured spirochete bib]  
MKHRSVFSAIILVLSSFSIISCQAQESRPDGMAYAILKTNKGNIVISLEFEKAPLTVGNFV  
GLAEGKLDATKGPYNGLTFHRVVADFVQGGDPIGDGTGGPGYRFPDEIVPDLKHDAP  
GVVSMANAGPNTNGSQFFITLEAAPWLDGKHSVFGKVIEGMDVVKQIQQGDRIESVTIQR  
FGAKAKAFDASQKAWDQRLSAAYATLNALNAQKRESDLALIAQKWPDLKPDEKGFQKTI  
RKGFGDTPKTGSKVSVIYKGMLLDGTVFDQSSLSGGPFSFTIGKGEVIDGWDSVVSTMQK  
GEKRFVIPPPELAYGAQSIGDVIPPNSFLAFEIELVSIRE\*

>SPBIB\_v1\_210189|ID:27163081| protein of unknown function [Uncultured spirochete bib]  
VQHRNPYFGTIGDIEYLQPIINAIGDFGNSDSRISLIFMIISF\*

>SPBIB\_v1\_210190|ID:27163082| exported protein of unknown function [Uncultured spirochete bib]  
MKGISRIAIRSFLAILLILSLPFAASAQTPGKTSATIQLAVYVPPVLQSLDFAPNGAAN  
IVGYLGTNPGGFRNGFELKPYSIFNLGAARLVSNLTSSYSIVVQSMNGGKLNQSSGSEI  
AYDLLIGGMPAARYGDSFRMVTAMKTARDGTDLPVSIALGNIPASASYGVYSDSLLFNVM  
AN\*

>SPBIB\_v1\_210191|ID:27163083| OsmC family protein [Uncultured spirochete bib]  
MTKEIQMNWLDGMAFQSELDGHTLVIDADDSVGGTNRGPQPKGLLLVSLAGCTAMDVISI  
LKKMREPVSWFNLKVSGLDTEEHPKKFTSFKVIYQFKKSDGLNPDNVQKAVELSQNKYCG  
VSATLRKAADLAWEIEYI\*

>SPBIB\_v1\_210192|ID:27163084|fusA| Elongation factor G 2 [Uncultured spirochete bib]  
MAFDIQMMRNIGISAHIDSGKTTLSERILFYCRKIHAIHEVKGKDGAGATMDSMDLERER  
GITIQSAATNVQWKDYAINLIDTPGHVDFTIEVERSLRVLDGAILVLCSVAGVQSQSITV  
DRQLKRYHVPRLAFINKCDRTGANPFKVKSQLGEKLGPNPAFVTIPIGLEDKFEGVIDLI  
DMRAVYFDGPNGEELRFAEIPAHLVKDAERYREELLEAASMFSDELAEAYLEGEVTKDLL  
LAAIRKGTIEEKFPVPFVGSAYKNKGVQLLLDGVVDFLPNPSERHNVALDLSNNEAEVEL  
KADDKAKTVALAFKLEDGQYGQTYVRIYQGMIRKGDELYNTRARRKFKVGRVLRMHASS  
MEDINEGSCGDIVALFGIECASGDTFCHPDLNYAMTSMFVPEPVISLAINPKDTSKSSDQM  
SKALNRFTKEDPTFRTYVDPESNQTIQGMGELHLEVYIERMRREYKCEVTTGMPQVAYR  
ETITQRADFNTHKKQTGGSGQYGRVAGYIEPLKDEHYEFVDMIKGGAIPAEFIPSCDKG  
FRAAMEKGTIGFPVTNVRVINDGQSHPVDSIDIAFQLAAIGAFREAYEKAKPAILEPI  
MKVA VETPNEFQGNVFASLNQRRGIIMANTEDGTFSRVEAEVPLSEMFGYSTVLRSLTQG  
KAEFSMEFEKYAKVPTSISEQLRKDYLEKRKKDQK\*

>SPBIB\_v1\_210193|ID:27163085| conserved protein of unknown function [Uncultured spirochete bib]  
MLKEEFIRKSPVRIFENSIEGGLHAGDIGVLASKKGIGKTSVLVQIALDKLMQGEKVIHV  
SFNAHTSYIISWYENIFSEIARRKNLENIDDIKEQLVRNRMIMNFTQEGVSVDQITRTIK  
ALINEGGFNAKTIIVDGFDTRATAERFEKVKAFLEAEMQLEAWYTCTLAEAEPLDPPQGI  
PVVLR EIEPLISVIVVLEPKKDFIHLRVVKDHERRNPSDMNLLLDPRTLIAEA\*

>SPBIB\_v1\_210194|ID:27163086| conserved exported protein of unknown function [Uncultured spirochete bib]  
MTYAACFLLGAAPAGADAKASRTTSGRGCWRSALIFFIIAARSLFAQTLQRLSFSGF  
E WYVRQTTEPEGPMNNLFGGTGTSVDVLPDGLRLSITYREGDWYAAEVWTTKSLGYGTYT  
FRIRTPLAQLHPDLIFGAFTYSRALGYFHREIDIEFSAWGKKVSDLRGQYVIQPFDKQGN  
MHSFPAKPYAGPSSQQFTWLPDRIEFASWLGYGKPPAGDPRLIDAWTFNDAKSIPKPSA  
AIHMNLFLDGRPPGKKDGLQLVIIDGFEFKAAPK\*

>SPBIB\_v1\_210195|ID:27163087| putative 6-phosphogluconolactonase [Uncultured spirochete bib]  
MILHVYTSDDVWLRAASEFIFSGLSEAREVRNAREAPQRSLLHCLAGGATPKPIYEALAR  
DPQCAEIANARSIHLWVGDEREAEPGSGFRNSEMIAAAFYKYSPTAFVLHQWPPGRRALAA  
RTYEEELSTFASERVRANQPIFDLTILGMGEDGHTAGLFLSDDFQSPADSLKRATILPNS  
LVMLTEAPQEPKSRMTLAPEILRSSRRILVLMQGLTKVRVLIANLVGEREDPIKHFLNET  
CEVIARI\*

>SPBIB\_v1\_210196|ID:27163088|zwf| Glucose-6-phosphate 1-dehydrogenase [Uncultured spirochete bib]  
MNIATDMPYCRLDTRFSPQPALFIVFGASGDLANRKIFPALYDLYLEKQLPDELLMVGA  
ARRNYSTKEFREILRASCLAHSRHQDEALHTDAWHAFSQRVFIQNDVADPQSYEPIRRL  
VGEQDRSVLEGLAPHIAIPHNILYYLAVTPEFFPVIENLGRMGCGSNASAPGWRRLVVE  
KPYGKDQRSAAASLTEALHKWFEERDIYRIDHYLGKEAVQNLLHFRFANTIFEPVWNRNYI  
DRIEITVAEQEGIGTRGGYYDGFGAARDMLQNHLTQLLCLTVMPEPATLSPEHIRDEKVK  
ILRAIPDYSPQEILARARRGQYAVGTNARGEVVPDYLNKAVRPDSTTETFASLTLSVEN  
WRFSGVPITLRTGKALAEKYSEIVLYFKRPPSALFAAQCGDLLAPNSLTVRIQPDEGIWL  
SFNAKVPGEPAIRANSLRFSYREVADYFPEAYERLILDALSGDSTLFIKRADESELAWQVI  
DKLEAAWASADPKAAPESGGLLKYQAGISLRDLIAQVREPVLREPVLREGLV\*

>SPBIB\_v1\_210197|ID:27163089| putative RNA methyltransferase YpsC [Uncultured spirochete bib]  
MRAIAVCAIGLEKVLARDLAHLGFREVGRSAGR VVFNVSTNALAEDLTKANIGLRTADR  
V LLVVGEFKAFDFDGFYQGIYSLPWEAFCAKDTRVLIERARANGCKLHAQATLQSMQA  
KAI YAALMEHFHVRNMPETGRMLEVRIYGDNDWWQIVIDTSGEALSRRGYRRFTHEAPL  
KETI AASLLFLAGWSRSRPLIDPFCGSGTIPIEAALYACNAAPGLKRRFAFEDFPEMDQ  
NKVED MRLFFRQQVRRDIRDIRASDLDTKALELARRNATLAGISEFIKFFNADAREL  
VPPEAAI RSAEVRGDMAQSGIVTAGAASPGAASGPPAGTRGIMLANPPYGQRLASP  
DEARALYRELS PMLKRYLDAGWECGFLSADKEFGAIGVEPTSVRMIVSGQETIFFN  
WFSAGIAEAGGHAP RSSNEHRRSRAPISPNEHRSRPSGSPQADPQRRPSGSPQEIR  
QGRAPRSPSQ\*

>SPBIB\_v1\_210198|ID:27163090| Iron-containing alcohol dehydrogenase [Uncultured spirochete bib]  
MQNFEWVTPTKVFFGAGILNRLGLETSLWGKRALFLYGKGSIKTSGLYNTVVAQLR  
GANI FFVEHADVQPNPRIAHATEGARKAKEHDLDCIVAVGGGSVIDEAKAIAV  
GALHDEPLWDF YTRKAVFRDALPIAVQTLPATSEMNGASVMTNEETHEKFSIR  
GEMLYPKLAFLDPSLT LSIPVQYTA YACTDILSHLMEGYFTATADFP  
LQDGMVEGVCRAVMGSLETILKTPRDFEA RSTIMWAGALAWNGLL  
KAGVEGASIPNHMIEHPLSGMYDIAHGAGLSIVIPAWLKYMKSH IAHRIVL  
FGQRIMGLEKQLDGKPAIEASDIVIEALEAWYQHIGTPIRLKEAGLQALDIDA  
CTKQAMALSKLWGVPGYTEADIRAIYRLMA\*

>SPBIB\_v1\_210199|ID:27163091| exported protein of unknown function [Uncultured spirochete bib]  
MRIRRMYSWAVMLLALVIAMMSLPDLLAAAQEISNLKPLLHVQTRWFDIYAPHELEAQA  
WRLSSFADNTYSKLNFFDTQPSRHRIPVLISDIAHSLNGYSTLLPSNRIVIFLASADPR  
GQLASMADELESVFLHEL VHCITLNERKGGWKALAWLGGDWVAPEGWMMMPQAL  
VEGTAVW AESRLSAENGAAGESRAEDDVAGRENQASAKSGRLNDPAALQIVRIE  
REWQNRLLWDVS GLADFYGSGSLAYLYGGLFADYLAERFGPEILGQLWHDA  
AAGNIFRFGFDGTALSKGILEV KTGVRPQTLWADFLSWIDSGMEKAGEVRDA  
VELFSGYIGAFDVGEGVVYYFDGDKKGVYA RAILDGQRKGVESQ  
GKEAESRGQTEPRRLFAADENLRNIRFNVRFHALDIDWIRPLPDG RTIPARY  
QFDFETKTL SYIRDLPIPPAGAALAVAQNGSSRENIFLYDPWTDPESGTDYGL  
VRLGSTILPARRTAEGKTEMIDIPGYAVRWISPGFRLDSEGSAAARGIRFALT  
LIPENGI SRLGILEEEHGSWLLL VQNAPEGGICQPVYANVTKIVYLSSKKDGL  
KALNVL DIGEIDK QSTSASSLSTIPVEWQDAVRWAQLHYLEAMQEPKQTA  
AIKKTDTLFPALFSSSRIPYAE GNTAGLVL TGSDLSEAAWQVFAGWDFSN  
WRPSESAHIQLGAGEWHVLFVSADQSVLYAS LGRVSSVSAVLK WERSFV  
PLFRSLSADLHGIFAGFQDAYPLAEVFLSPDSTSWAIGLDA QYQSLYRSR  
KPPYDQYGFALAAAGADYEVASRSGFGGMSLGGSSITVPGRVGLSAYGAYAPF

GGVAFSPALRLLASGSSIMPSAVQAPYPSYREYSSLLISLSNWWYAFGEVDVRLFSIEAGWM  
LRMPLSPSWALRRIIGRAGVRGAGLEIDSTPSALCSAFARVEFDLAILAGMVATSHTMFS  
VEAAWAFMAQKVGGSPHINIGINAEL\*

>SPBIB\_v1\_210200|ID:27163092| HAD-superfamily hydrolase, subfamily IIB [Uncultured spirochete bib]  
MKNSESRLQCLRPIASLTPQEARAIRYVLMDDTLTTDGLKPPESYAALWALHKAGLIV  
IPVTGRPAGWCDMIAREWPVDGVDGNGALVFWESEGRRLKSMTHPDAVPNSDPRLAALR  
DQVLAQVPGTRLARDQFSRLYDIAIDFAEEEPILPLTAAQSIKALFEGGGAHAKISSIHV  
NAWMGEYDKLSMVIRYLSARFSYDDDRNRATVVFVGDSPNDEPMAHFQMACGVANILKY  
RELISQLPHFVTRRESGAGFAEFTATLLERRAAKASP\*

>SPBIB\_v1\_210201|ID:27163093| conserved protein of unknown function [Uncultured spirochete bib]  
MAVVISASRRTDIPSYADWFFERLMEGFVDVRNPNPKLMRRVLLDPESVGCLVFWTRD  
ARPMLSRLDELEPYAFYFHITIIIGYGAALPSGPLASEAVEMLKALASEIGQNRVIWRYD  
PVLLAGCYDANWHIRNFAALAKELSGSVRHCVISIYDAYRHTDVRLKKAGFLPLCGARGG  
EGASEKSSAHYQLLAKELTEIAASEGIFVSFCAEPELQQVQPSLGLGCIDSAIISELTHQ  
SFSSRKDKNQRPACKCIESVDIGSYGTCPRGCLYCYADRTGKKQARNSSG\*

>SPBIB\_v1\_210202|ID:27163094| Phospholipid/glycerol acyltransferase [Uncultured spirochete bib]  
MDTIKSKYAHLIGEIIAHVPQNAHVSEENVYQQGIAALLPYIDTIIHDYIDDCSDIEGIE  
NLASLHAHAKRGESCLMLMEHYSNFDLPVFHYLLRRSGQKGEEIASDIVAIAIGIKLNEEN  
PAVHAFARAYSRIVIYPSRSMQIIKEKYKDPKELYQEIKRSISINHAAMKALSAAKESGK  
LILVFPAGTRYRPWDPSKRGVREIASYIKSFSKFLVSVNGNILRINPSGDMEDDILQK  
DRVIYNVSPVHDSKEFLASVKYDLHFRDDKKQAIVDTIMDLLDAMHKETEDRCKG\*

>SPBIB\_v1\_210203|ID:27163095| Rhomboid family protein [Uncultured spirochete bib]  
MQTNSILRRPFRFRFFNATLYLIAANVLIFALGYVWPMVTYALALSPQAVMAGWVWQVFT  
YMFAHANLTHLLVNMLGLFFFGTPVERTLGSLEFLLYLLSGTFAGIASFAIYAFSGAWN  
TMLLGASGAVFALLAFGLVYPKAMVYLYGIPIRAPLMVIGYTAIEIVFTLLGAASSVA  
HLTHLAGFVAGAA YFPVRLGMNPFKRLRER\*

>SPBIB\_v1\_210204|ID:27163096| conserved exported protein of unknown function [Uncultured spirochete bib]  
MKKYALVALFAVAVFGMAFAVVPPTTQSGTVSISGSVAEVFSLVTPETYGTIANGSTA  
ETWSIGNVVVTSNVKNWTISVSSANSGLVHSDNTEKIA YTM TLGSLVTDQSLASAWTS  
AAQPRTAKVGNSYALS VKFGPSADYYQAGTYGDTLVTISHN\*

>SPBIB\_v1\_210205|ID:27163097| protein of unknown function [Uncultured spirochete bib]  
MKTEPDSEGRKGSTFSIALSCVLCALAI FSFLMLRESAYRSESALLKSVSEKVAGQISAK  
IQTILEIGEQRQLLLTDSGKTYASLKL LADESLAKLQYIDSITVAPGAI VRYCFPEEKA  
SGAIGRDLLDGPDRMQALVRAVSRKKA VLQGPTLSADGRNLAFLRVPVFNGADLWGFVSV  
GFDTRMIEYLELGAAFPGLIAVASSEPEESGNSVFWGDQSAVQGYPARVKAGVENVSW  
TVYAASNYPARQAIWWGVALVALSILSLGLFVSRI FTGRHLPERTMGVNIKAELALKEAS  
FAVAPFVPQEKVEKVWPGASEAECDELPRQAALAEDEADARIPGAAPSSEQPGPPGSP  
ISMSGAPVSPAQPGTNETIRLAPERPVSVLVVDDSEVNREILLRMLALKG YEAEAVDSGA  
AALSTLKKRTFDVVLIDCIMPDMDFALAREIRKSEASTGDKKKPVALIAMSPRHDL EEA  
ERSSQAGFDSLLVKPFTMTALDQKIGERVL\*

>SPBIB\_v1\_210206|ID:27163098| exported protein of unknown function [Uncultured spirochete bib]  
MKKFFLLVLAAMFSGLPVFAADSVSTTLQATVGAALSITTTIPGTKALDPTQTS AALGSV  
TITSNL TNWKIVIHSANGGKMVRS GSTDVYPYL VTFGATTGIDLATDY EIIKSAPQSAVT  
TNVSVTYQTAATLGISAGTYEDVLTISLVAI\*

>SPBIB\_v1\_210207|ID:27163099|secF| Protein-export membrane protein SecF [Uncultured spirochete bib]  
MKRLIRFSKFFLPAMIISSTIIVLGLIGYFTKGFNLGVDFQAGINETIQLAYPAGEVSFT  
GKGNAELTVSETQLMLVFSGAEAQKRTVALDYKSYPTLADIKAA LGKETGISVKLSEGS D  
ALPSSSIVPTYQGNTLLSVNPVKLYRAPINDSERFASIDIVREALKPLGQVSVQTINPVT  
SQRYLVRVRDDGKNPQFTTMIPQTIRQLIEDKVGKDRVVVVKTDYVGP RYSQTLGQQSAW  
LVLVTL LLLILLYSTIRFKIEYALGAVLAIMHDALIMVAFIVWTRMEFNTTTIAAILTILG  
YSINDTIVQFDRVREERKIHPSERFVDVLDRALTLTLGRSVITLTTMLAVLALFLFTTG  
SIKDFALALLIGMTSGVYSTIFIASAFVLMWENRRAGKERKQAKLQKDV PDKAPGKAPAG  
V\*

>SPBIB\_v1\_210208|ID:27163100|secD| Protein translocase subunit SecD [Uncultured spirochete bib]

MSKFRLLVVI AVLAVAFMFLFPSIQWYFLTPKEDQAI AVGSREQIREYSRRMTYLIITD  
LKQKATAKDTTDL SGQKMYSVAIESAKKAYSLAKKPAPKTWDAI AILSAFSGERSMFD SI  
ESRYREHVL SLKNVHSNAVQLGLDL AGGMSAVIQADLKGLSEKLG HDLSSAEKEDAMKRA  
VEILNSRIDKFGLTEPVIR RQGEDQIYIEIPGAADPERLNSIIMGKGNLAFYLVDSEAST  
AVSSYLATNPV GIDEQTMVVDK PGLVPEGKIVRKVYK KDSYGLDEFTGEYLVLEGK PGLD  
GSHIQSATVSSDPITGKPETNFVLDKEGGDLFYKLTSENVGKTMAVVLDDR VKSYARIQE  
PIRESVRITGFSSDEAESLALLLR TAALPISLSVVSQQAIGASLGEDSIAQGR TAILVGI  
LSIFVFMFAYYKWAGLNATIAQVLNLYLMLS VLTAFKLT LTLPSIAGFVLT TGMAVDANV  
IIFERIKEEIRAGKTRAAAIDAGFHKAFWAVMDSNITIIAALFMAQLGTGPIQGFAISL  
AIGNITSLFTSLFV SRLIFDFETDVLHATHTSISWRVR\*

>SPBIB\_v1\_210209|ID:27163101| Preprotein translocase, YajC subunit [Uncultured spirochete bib]  
MNGIQNGLVLLQGT TAANPTGQLVSTIVTFGLVFVIFYFLIIRPQNKKQKDMQKMIAGVK  
KGDKIVTIGGIHGVVA AVKETTVMVKVDDGTRIEFSKSAIASVSPAKAE EKASEPVEEAA  
EKAEDK\*

>SPBIB\_v1\_210210|ID:27163102|yqeA| amino acid (carbamate) kinase [Uncultured spirochete bib]  
MAARKTIVVALGGNAIIEEGTEGTTEQQFENTR KSMKAI VGMIAEGHKVVLTHGNGPQAG  
VHLIRNEAASAQVPPSPLNVIVADTQGS MG YMIAQSLANALRAEGIEKDIVTVVTQVEVD  
PNDPSMQNPSKYVGP FYKAEQVEKLRERGWIKEDPMRGYRRVVPSPKPLDVIEKDTIKD  
LIDDGKVVI AVGGGGIPVKRDTDGMLSGVDAVIDKDRASALLASLIDADELIILTGVDKV  
AINFRKPDQQVFDHLTVAECEKYMAEQFPKGS MGPKIEAACDFIRRGGAKVIITSMENA  
TAAVDGKAGTVITA\*

>SPBIB\_v1\_210211|ID:27163103|ispH| 4-hydroxy-3-methylbut-2-enyl diphosphate reductase [Uncultured spirochete bib]

MCMGVRRADELARQA AQEAANEGARVFTY GPLIHN PQAVAELEALGVHVLDTKEVEDGSA  
SIPDLNDAIVVIRAHGASLAAISRMRMGCRIIDATCPRVIKSQRLARHYEKL GWQVVLI  
GDPRHGEIAGILGHTSNAIVVDGPTTALKIARKLKDKPCALIAQT TIRQEDYDAVIAIFQ  
ANVPTITAECTICPATRERQQALVELCGQVDAVLIVGGKNSENTKRLYASAI ECGKPAWH  
IETASELTAEMARYERIGITAGASTPDFIVDQIQEVLGAMASRRKFTLAGGQS\*

>SPBIB\_v1\_210212|ID:27163104| Nitroreductase [Uncultured spirochete bib]  
MNILHEIEDRRARRGLSEEPIDERIAAELVYAATLAPSCFNNQPWRIVMVSNEPGSAQAE  
GIRAALTPGNAWAQKASWFFVLCTAAHLDCRMDEGRDYAYFDL GQAAMAIELQAQHEGLI  
AHPMAGFSPSKVRAALSIPKEIVPLV VLAIGKPGPTDALSEQQKASENSERIRKPLGEVV  
FLGSFGNPLQG\*

>SPBIB\_v1\_210213|ID:27163105|udk| Uridine kinase [Uncultured spirochete bib]  
MPPVKIIGISGGSGSGKTTIVRKISEMVSD FVFLPQDNYYKSAEFINNRNITAFNFDHPD  
AFDNDLLIQHLTSLKNGESIDMPVYDFVHHRRT EQTIHIQTCKLVIFEGIMIFTNKQVRD  
LIDLKIFVDTPDDIRFIRLSRDIKERGRTVDSVVEQYLT VVRPGHYEFIEPTKAYADII  
IPEGGFNERALDVLVTFINSVVYP AEGREKADSVPERKPPAVL\*

>SPBIB\_v1\_210214|ID:27163106|msrA| Peptide methionine sulfoxide reductase MsrA [Uncultured spirochete bib]  
METGEKTEKALLAGGCFWCLEALFKRVPGVLSV TSGYCGGAAPHPTYEEVCEGTTGHAET  
VEVVDLAVISYREILDFFWKFHDP TTLNRQGADIGE QYRSVIFYLDANQRELAELSKSA  
AQAAFDRPIVTSIEPAGHFWPAEAWHQKY YERNPDAPYCRFVIAPKLAKLR\*

>SPBIB\_v1\_210215|ID:27163107| ABC-type transporter, integral membrane subunit [Uncultured spirochete bib]  
MNILTFVNVLSIGIPFSVALLLASTGEMFNQRAGVFN LGCEGIMSMGAFLAFMPAHL LQ  
NTSLAPYANLIGIAAAIAIGALFGLL FALVTVTFRAPQGIAGIGLHMFGWGVAGTLFRYF  
VGGVTGVPGLKNLPIPLLSRIPIIGPLL FN L NGLAYAAFILVPASWYILFKTPWGLKVRA  
VGTYPRAADTMGVNVSRTRYQALVAGGMLAGLAGAYLSLGQA KMFADDIVAGRGFIAVAL  
VYFGRWNPYLILGGSLLFSVAQSFQLAIQVLGIRFPYEFAVMLPYVLVIVVLALTPGSVT  
RGP AELGKPFDRKRV\*

>SPBIB\_v1\_210216|ID:27163108| ABC-type uncharacterized transport system, permease component [Uncultured spirochete bib]

MKSTYRALYIFAISLAAALAAILLGAVVLEILGKDPLAVYK VILTEPLKDLFGLTEISVR  
MVPLILVALGIAISFRSGILNIGAEGQIQMGVIAAAAAAIYLPPLPKIVILPLVLVAGAL  
AGAIWASIAGWLKAKLNVSELLSTVMLNYIAAQLYGFLLRGPMIDPAELQVGS GTPQSVR

LPKAAWIDRIIPGMRLHYGFVIAIVLAILVYVFLWRTKWGYALRAAGAGPKAARYGGIKV  
ETCLIAAMALAGAFAGLAGAIEVTGLHRRRAIEGISSGYGFSGIVVALFGGLHPAGIVPSA  
FFFGLLLIGADMTQRIMSVPANMVLVLQGAVILSIIAAKMLIADQYLFERFARMLEKRGR  
KAAGGKTKAGAGKAGAAKVDRRREQP\*

>SPBIB\_v1\_210217|ID:27163109|yufO| Uncharacterized ABC transporter ATP-binding protein YufO [Uncultured spirochete bib]

MNNEPIHSLAVEGITKRFPGLACDSISLDVGEHEILAIVGENGAGKTTLMNILMGLYQP  
DEGKILINGREVFHFRTPVDAYATGIGMVHQHFMLVPNLTV AENVLLGMREFQKFLWQDME  
GVRKRIREISERYNLPVQPDAYIWQLSVGEQQRVELVKTLC LGARFLILDEPTSALTPQE  
TDDLIALLLKRMSSDLSIIFISHKLAEVTALSDRIAILRQGKV VYRGTTSQSVSNLASLM  
TGHEVVLPCNECTGGSGETILEIRNLKVRSDRGFFALDGLSLSLQKGEILGLAGVSGNGQ  
RELADALAGLRKVESGSILFRKKELANKSPRSIIEAGIGYIPEDRNEEGIVPPFNVRDNL  
ILKDFRSKHFKGPFRRFDETRQNAEELQKRFDIRCASL NVAAGSLSGGNIQKVILAREL  
ARKPEVLI AVYPTRGLDMGAEEFIHERLLELRSQGTAILLISEELDELLNLSDRIAVIFK  
GKILATMPTRETSKKKLGLLMAGISGEGAA\*

>SPBIB\_v1\_210218|ID:27163110| putative ABC-type transport system, periplasmic component/surface lipoprotein [Uncultured spirochete bib]

MKRFLCVLIALCLIAGAAFAAPKTKVKIALIVESTVDDK GWCQSMHDAITAVQKKYGTAL  
VEYSYSEKMKPVDAGSAARQYVAKGFDIICHGAQYKNLVLEMADDFPKTTFAFGTSGEI  
GPKNVFTYMPSEETGYINGIAGLVTRTNKIGLVGPVDGGDAARYNRGFILGVKAVNPN  
AVVQVAYTGSFGDFVKAELAHTQIKAGADVLTGSAQQALGALRAVAEYKDKPIWWLGQD  
TEQLKVPESYKVIAAASYAYAAVVEQLIDKRQSGVLGGEVIPLNFANGGFIYKFNDNVGP  
VLTADIRKQAEKALADITASKLTIAWQSVK\*

>SPBIB\_v1\_210219|ID:27163111| PP-loop domain protein [Uncultured spirochete bib]

MKHARSTLAKL TEVAIRRYNMIEEGDRILIAVSGGKDSSCLAWDLALKRQWWDVPFEIAA  
CHVATDLASAGYSNPVDDSWLKAKMADWNIPFVRIDVPVAGRLKPSETMNCYWCATQRRT  
ELMKY AQANGFNKLALGHHMDDILETLLMNMMRKGEFATMPPVMPYRKYPLTVIRPLALC  
EERQIIACADELGLTSHCTCSFNLDGERKKT KRLIDQITGGSSHVKNIFASMSRIRPD  
YLA\*

>SPBIB\_v1\_210220|ID:27163112| putative 2'-5'-RNA ligase [Uncultured spirochete bib]

MRLFAALPLPAAAQHRIA EYCRTIAPSFALARPSWVPEENLHLTLHFFGELDQKNAATLQ  
NLLEAEAINCPSLTLRIGNLSVLPSLRAPRVL YLHTRIEPAAPLFLSLIDRLRIIAAQIGA  
ETDSRPWKAHLTLARLKEPWIPELSSLPAAPEISFAIDAFELMQSRLTREGAMYS CVRRY  
AFLTCSR\*

>SPBIB\_v1\_210221|ID:27163113| putative Diacylglycerol kinase catalytic region [Uncultured spirochete bib]

MKPDDLAEGLNAIFARSPVFPEKSLIIDVIANPKAGGFSRIHHSRKR FNELKEIVRRSLQ  
LPERASPYALKMHLTERCGHAAIVQRILDRSPSNGKDSCHLIITAGGDGTSLETAERLT  
KLPESEKDRFGLVRLPFGTGNDGSEGRDLLVALGRFLGSAAFERRAALRVTPSEEGGLP  
RYSFNIASIGLDA YVADMTNRLKRHFPGDSYRFWVNIGTLFYDRIYNVGD MHLKAWGEDG  
KIVMDSTGPRLLVAMGVSGNRQYGSNKKILPNDTNCVAVSQTSLFRKLILKGPIEQGRHE  
NIPELVHFSAEKLMIEYGERIPLQCDGETNELAKCDFPLIMERVRNA YNVVVPVLA\*

>SPBIB\_v1\_210222|ID:27163114| Multi-sensor signal transduction histidine kinase [Uncultured spirochete bib]

MILDASSLIPALSFCIYIPFIVFGLASKKERNVNSFLEYMGFMALWSFGSFM MHANTGLF  
TPLIWNRVMLVGLLGGPITIFGTLIYFSRTEKRRYRILLYFGYIIYIFLL YLNFSGKIIVT  
DAGFEGNVFHYSLGPGAPIAYSLSYFYLLAILLILWELRTNPDRFLKRSLRLV VAGVVI  
MLLGVAANLYAPLGRYPVDLLAATINAAIIFSVYKYRLVHYSAVMLNIFL TLLVIIFAS  
VIYMLFFVPVFALDRVIPFSELALLSVLLGIVSALLSPLRTATQALLERI YGGKSFLYY  
QELRKFSADLTSIVNLEDLAKLTVDNVISTFKLEWAFVLINDYNARNFRII ASTGLAF AE  
TYGETTDQHVI VPRTDQFVQAYQLRTIQNQAA YQRTISIKLSKGEINETVQASLVLPLK  
FKERLNGFIVLGPRIEKDYNNQYDLEILQFLTDQASVAMEN AISFERLRQQQKRLQETNE  
ELTLNRNKLEAFFDGIATPISIQDINYNIVTANYAARRYFEKPLEELV GSKCYKVYFN RD  
RPCAECLAQDCLHTKLPFSAEKQDSRTQLTFALNFYSIPTPKGSVGSFIEFFQDITKQKT  
LQEELIQSEKLAGIGTLVSGIAHEINNPLGGILGTADLMLPETPESSTLREY TLDIIRYA  
QSAAEVIKDLMTYSRKTRTSAEPINIITILENSLKMAMRGIDFGTIIVRKSYDSVKEILA

NPTELQQVFLNLIIVNAVQAMNSDGLTLSCRQEEDDVIITVQDTGTGIDKENLDKIFNPF  
FTTKEAGAGTGLGLSIAHHIVTKSGGRILLDSQEGKGTTFVILLAASQDKDRHLIHAKE  
ETRFEDSFYLQRKVLVGEKGYQEETIRRKCDDEVAFHILAYKGLQPIGTVSLHLSEEEGR  
VPIEENFSIAHYLDGSLYAEIDRLAVAKEERGSLIPFSIMALAYLYARGRGAKKIFLDVF  
SDEVKLIKMYEKLGFEEIGSYSKPLPCTVMMMDHVSRYEQEVSMEHFVKPFFSRLVPKI  
DFSGQDLHYVMKAMDEISAKFPKESADEQQVGEAM\*

>SPBIB\_v1\_210223|ID:27163115| conserved membrane protein of unknown function [Uncultured spirochete bib]  
MVSIIIFICGFAVLMFAEWRYVHFSSRKSQRALRGKTPGLLPGHHTALQAAGYIAVAAGMLI  
SLLHEGLALHIPPLVRTISLCIGLLGGALLVWTVFIEIPVGAKKHAVEPGCAYHYGSYGM  
CRHPGFWWFLIFTLGIALWKSDFYAFLLFFFENALNLLLILLQDKYTFIVQFRDYQEYQK  
KVPFLLPGPKQDG\*

>SPBIB\_v1\_210224|ID:27163116| Response regulator containing a CheY-like receiver domain and an HD-GYP domain [Uncultured spirochete bib]

MTTLQKRTVLIVDDDVSMMQKVLSSLMSKKGIEYAIKNGREAIIDLLESGLDISPDAILLDI  
RMPVMPGLAALPQIRSILPSVPVIMLTAFGDLETGLAAMKSGAFDYLKPKSSIDKIQETL  
EKALSYRDIMEMKAEERKREYRLELEHRVESSYQELGDVYRKLKQMNIAAYALAETI  
EAKDRYTQGHCEVRWLSSLLGKVMRLPDEEIEQLEYAALLHDIGKIGIPDSILNKEGPL  
DDRERDVIRMHPIIGAQILSTVEFFAKAAAAVRHHHERWDGKGYPDGAQGEQIDHLARII  
SLADTLDAMATSRPYRTALDFDEVISELKSMRGTQFAPDVVDAFFAAELDKAYLKRLEE  
TGKNII\*

>SPBIB\_v1\_220001|ID:27163117| conserved protein of unknown function [Uncultured spirochete bib]

MTEALSFAEREQRKRTIISYAVAIGLYALLFGAGLLFDLFRPPIMDLNKTIVNIQGPV  
VNDTGKGGSPVEKKDTVATERPAPPPSPAPKQAQTAAKTAPATPSPAPQAEA VPVPVTPA  
VQQPVEPWTPGERGPGSRVSSSESVLSPGEGQVPWGTGQAIKIMKAEKGNTVETTLGGS  
SETVQGSLYVPIYLGMPPLSSVSADLFNAIPDEIIPHTVITSADARKRAFLNYYVKNGN  
EYVLKNPAPLDVREKLWEMLEDAGYNAELADYKAGRSLSPVVIGFSITKDRQLRGVELLQ  
SSGDPDIDAAVLYGFKRASFWNKSGDTIQGRFVYRF\*

>SPBIB\_v1\_220002|ID:27163118| conserved protein of unknown function [Uncultured spirochete bib]

MARDHRIQPKINFDLTPIDIVLQLVIFMTTTTFRTAPGISLQLPGSKTAQSIATPELR  
VIVVSANEIYLDKTKTNLAGLELLLKRKRVSGSSASQIRAVLEGQSGAEYQLIISVLDALR  
MNGIENVGLITRKEKVVQ\*

>SPBIB\_v1\_220003|ID:27163119| putative tolQ-type transport protein [Uncultured spirochete bib]

MLDFISKGGPILWVIMALSVVALAIIERLLYLRRISIDEEKLFLRIKTSLMEEHYSEAL  
AICDQNVSPFSALLKVGIENRNQPEYLQRELLKDAAMESINLERGLPALGTISNISTLL  
GLLGTVTGTMKAFGVLGKFGAVSDPSALASGVAEALITTVGGLVVAIPVIMFYNYFASKV  
NYIITRLETQVNSLVDLISTYAGESSANTAEPKPAKEG\*

>SPBIB\_v1\_220004|ID:27163120|purB| Adenylosuccinate lyase [Uncultured spirochete bib]

MVFLIQFLGHNCYYVRMQNFDQFQSPFSWRYGSQAMRIIWSETYKRRLWRRVWVGLAKAQ  
SRYGLVTSSQIAELEHAADIDIEKAQEIEQSLRHDLMAELRTYASQCPIAGGILHLGAT  
SMDIEDNADALRIRDSLNLKDKLADLLSVLVDKIERYAAVPAMAFTHLQPAEPTTLGYR  
YAFYAQDLADTYERFNDALRNIKGGKGFKA VGTSASYAELIGVEHLDEFETALSEELGIR  
FFDVATQTYPRIQDYRVLSLLAELAAVLHKMAFDLFRILQMPILIGELSEPFGRQVGSAM  
PFKRNPIEA EKIDSLARL VASYPGVAWGDAALSGLERTLDDSANRRVILPEAFLACDELL  
QSMKKLIEGQSVDETAIQRTAQAYAPFAATERVLMALGKKGADRQEAHERLRDLAMIAWN  
AVREGEPNPLRQLIQSDEFFASRLSSDAIESLFDVDTYIGAAEKRARIVAARIRSLFR\*

>SPBIB\_v1\_220005|ID:27163121| Single-stranded DNA-binding protein [Uncultured spirochete bib]

MNHLNSILVEGNLVRDPNLRGTPSGNQVCDFTVATNRSYKVADQKYENEVSFYDVEAWSR  
LGAACAQNLKKGGRGVRVVGRLKQDRWTDTEGKPHARVKIVAEHIEFKPMTKANKEETSKS  
DEFIEEAKRSEASMAVF\*

>SPBIB\_v1\_220006|ID:27163122| putative HTH-type transcriptional repressor AllR [Uncultured spirochete bib]

MSESAGKALDILFYLAKEGEGVSLARLSKETGMNKATALRYLTVLESKGVVERCLAGWTL  
GLSLFELGSKVPVRQLVAEKVRPIIERLARETGESSNLAYLAGDTAIYLDRAEANRSLRM  
RSMPGDRLPLYCTGVGKAILSQTEERIRAILGPGPLPKITDSTLTDPEIIHEAMRARE  
LGYGVDREEFEIGLTCYAMPLRLPGSDFVGAISISGPTARMKNPEIRERFLAILRQAVQD

ATDMLSPYHYFENLPENRGD\*

>SPBIB\_v1\_220007|ID:27163123| Peptidase U32 [Uncultured spirochete bib]  
MNYNTRSWGGGAGPQPRPGPSGRIFPLHKVENTTKCLHQRAIHDIKDTVKRIELLAPAGS  
PEALDAAISEGADAVYLGLRSFNARMRSANFAFNQFEAAVYACHDRLRKVYVTVNTVFEE  
READRLYQLLEYLVSVPDGIIVQDVGVAKMASEYFPSLHLHGSTQMNVAASSAGCNQLSR  
SGFKRAVLARELSMEEIRHIRQYTSLELEVVFVHGALCVSASGLCLFSSYLGGKSANRGM  
TQACRRLYEGENSTGYFFSPDDLQIEYLPALIDAGVNAFKIEGRMKS AEYVGTVVVSAYR  
YLIDNYEIDTERAVLKAKAMLQADFARSKTNFFITGAPDIYIHPDQAGGTGIHLGRIRDA  
RTIDDKRWALMNTYEGLAERDSVRIHRADDSGRITAKIQAIKYGVDGMLLQLDGDWRQND  
DVYLIQTAGMARRYKSILPKNLDRFRKFPSTHAAPQVLPVLDLKKLDAALPLGTYVLAG  
KVADLHAALTFRPKRAMILFDKLNAEVMRREEATL PFKRERLILWLDPYCTETDLAWLQL  
ELEHWIEKGVSVIVANNQAHFSLLRGKDVCIAGPWL YTFNQWALAYYLEQGAQAIVPPY  
EISRQDL YRLAEYLPAQIFMPVLFAYPDLFRIRADLSRTY GQTHFADRDGNFELVGRRD  
YSVVIPEQPFSLVLDLVPNLKKQGFSR FILDLSNAEPARGLYRDIARAAEQFKPLPNTSRF  
NWKDGFWSEEKMHSADEAPKAPASRSSQPGQLARRSATKASAPARSGKKDNEKSKPPRSA  
KKAARGRFSPSKKPPRQP\*

>SPBIB\_v1\_220008|ID:27163124|fusA| Elongation factor G 1 [Uncultured spirochete bib]  
MSLEKIRNIGIMAHIDAGKTTTTERILFYSGKTYKIGEVDGGEATMDWMDQEGERGITI  
SAATTTFRDHQINIIDTPGHVDFTAEVERSLR VLDGAI AVFCVGGVEPQSETVWHQAD  
RYHVPRIAFVNKMDRLGADFEAVLQDMKAKLGAHPVPLNIPIGKEGGFEGVIDLIEMQEI  
RWNEGDGEMTRTPIAPEREMAHWRRENLLDAVSSHSDIVTSL YLEGASIPADIIRPEIR  
KACIAQRFPVPFAGASRRNIGVQPLIDAIVDYL PAPDEVGAIKAFHTKKEEEVDIPCQTS  
GYPLGLVFKVQYDREAGSLCYVRMYSGLHNSSTVYNTS KKKRERITRLLRMHANKSEPI  
DSVSAGDIAV FVGLKLAQTGDTLGTEGYV LLEKMHFPEPVISVAIEPKT LSDRDKLKEA  
LEILAREDP TFAVHEDEETGQIIIRGMGELHLDV L VTRVVREFKVQAKIGNPQV TYRESI  
STKVQHTERFHKVIAGKENTAGITIEVEPLPRGSGN QYKKAIRAHEVP EEIFDAIERGIT  
SAFSSGIQYGYPAVDIGVSLV SIEYSEL TSTPFAFEACANMAYDAACRAASPV LLEPIMK  
VDILTPKEFVGEVMSLVSQRGGFIHGSESKA VAEVIHAQAPL ATMFGFTTSLRSVSQGRA  
SFSMEFSHFEPKR\*

>SPBIB\_v1\_220009|ID:27163125| protein of unknown function [Uncultured spirochete bib]  
MHIYTIGFAAVLLMLSGPGAQIKENIIDAILPRQSDPQCGYAVAAALIN FVKT AICLAD  
IQKGSASPTFSLEKIQAASLMHSYGKTPPLSLADLEKLLSMEGISSTPFRVPKDESLKL  
IAGAALPVV VHIGEPYPHFLGLGGDEEHILFFDPG SGLVALTHEESIALISGYFLIPEK  
TIAARPLEDYEKAFRKLKQLIWNVYWDCAQN\*

>SPBIB\_v1\_220010|ID:27163126| conserved protein of unknown function [Uncultured spirochete bib]  
MPMDFVNSPRVDTLVTESEKKVFELFETMVRTTGQERVQSAIALANLLGNPGEFSFYIDC  
TEDQRIIRVFHLLRVFRENMTLLIHKTWVDGSEN LQQDQLLGD LARFIQEFRDGRIVSAF  
RSFVGISRQIPSLFLGSLGKANDFLEYAFRIDPKFGLFFWYIAEIDLQLRNIESIPEHRE  
LFELEVLIGTFVISCF\*

>SPBIB\_v1\_220011|ID:27163127| conserved protein of unknown function [Uncultured spirochete bib]  
MAKEIRILPETKVGEGFIPPQYLGPD ETEYRIRDEQLRLLGKDPSDYRSLTTHELEILVR  
NNNTCNDWSHFLVKDPFCPELVRNNLFSGLIRISKLEHVSLEHHDIA MAAGIFNSQIIAC  
DIGDNCIISNCAYLSHYIIDDHCILINNAEIQVSNHAKFGNGIVMESENE SVRITLDVMN  
ENGGRWIYPFNGMLSGDAWLWAKFRDRTRLQERFRQMTDARFDKRLGRYGIIGRNSVLKH  
NRIKDTYIGESAYIKGSNKLKLNLTINSEDAPTQIGEGVEMVNGILGFGCRV FYGCKAV  
RFVMCDSSALKYGARLIHSVLGENSTVSCCEILNNLIFPAHEQHHTSFLIASLIKQSN  
LAAGATIGSNHNSRAPDGEIEAGRGFWPGLCTSVKHSSRFASFCLLAKSDYKHELNIKFP  
FCLVDSDETHGRLMLSPGWWWHSNSYALMRNEKKFKERDKRVDTSIRFVYSPFAPDTMSE  
IFEGLAILEHAAGEAAMRAISSNDSGSMFGDRIFALLAKISDAAVEPKAGTEEELKLV  
QLGALILSSSKDPLPFEVTVRGFENS NR PQVIKPCAGWRSYREMLLWFAIQTVIPALEA  
APLSSDPYEYLSSLLSASACKNIETEWENLGGFLVRRSKLEDLIERIESGNIQSWDALHE  
EYRRLSAEYEH DALAFAWCILGYLSLAIEESA IWDHNEAHLPEPSRETFIQMLRDAHVLA  
SEIAQRVFATRAKDWANPFRKATFRSEAEQIAVHGKVEENSAIQAVKKDMHEVQRAIDRA  
LERLGTALNLG\*

>SPBIB\_v1\_230001|ID:27163128| Urocanate hydratase [Uncultured spirochete bib]  
MNSSPYTISLDFDELPPPEPVFEPGIRRAPRREAELSPAQERLALKNALRYIPQKWHEKLA  
PEFLKELRERGRYGYRFRPQGRKGLPIDQYPGKCLEGRAFRVMIDNNLDFDVALYPYE  
LVTYGETGQVCQNWQMRYRLICKYLEILDENSTLVVESGHPLGIFASHPYAPRVIITNGLM  
VGMFDNQKDFNIAAAMGVANYGQMTAGGWMYIGPQGVHGTYNLLNAGRLKLGVS KDGD  
LAGKLFVSSGLGGMSGAQGKAIIAGAASIIAEVDRSRIDTRFSQGWVSRVADSLEN AVR  
LAI AARDKGEPIAVAYHGNIVDLLEYLDAQNIRVDLLSDQTSCHVPYDGGYCPVGITFEE  
RTRLLAEDRTYFRALVDASLRRHFEVIMRLVRKGTFFDYGNSFLKAVFDAGVKEISKNG  
VDDKDG FILPSYVEDILGPELFDYGYGPFRWVCLSGKKEDLIKTDHAAMECIDPNRRGQD  
RDNWIWIRDAEKNKLVVGTQARILYQDAFGRMNIAHKFNEMVRKGEIGPVMLGRDHHDTG  
GTDSPFRETSNIKDGSNVMADMAVQCFAGNAARGMSLVALHNGGGV GIGKAINGGFLVL  
DGSERVDRVIRMALS WDMGGVARRSWARNPHAMEVCDEFNRERA EFGVITMPNLVDENL  
LDAVISALNLV\*

>SPBIB\_v1\_230002|ID:27163129|trxA| Thioredoxin [Uncultured spirochete bib]  
VTENLNKETFLEKVFNYEKEKEWKYNGELPAIIDFWAPWCGPCRMVGPVLEKISDEYAGK  
LIVYKVNTDEEQELAAAFGIQSIPSILFIPVNGQPQMAVGALPKSTIESAIKDVLGVEAA

\*

>SPBIB\_v1\_230003|ID:27163130|mdh| Malate dehydrogenase [Uncultured spirochete bib]  
MDNDVTWWKFDEVEAFMKAGFEAVGVAPEVA AVCADVLISADKRGVDSHG VGRYKPIYLD  
RIWAGILNPKTTTFD VVRETPTTAVIDGHNGMGHYIAKRAMELAIEKAEKYGIGMTVCRNS  
THYGAAFYARMAVEHGMIGLTTT NARPAIAPTWGVEPMLGTNPLTWGMPSEDEFPFMLD  
CATSVTQRGKIELYDRLGKELPDGWVIGQDGKYRHDTHQVLTDLTQDKAAL TPLGGLGED  
LGGYKGYGYAMVV ELLSSALSQANFMKALADIGPDGKKKPIELGHSFLAINISAFCDLED  
FKHHVGEVSRQLRASKKAPGAERIWTPGEKEHEIWL YRKDKGVPFNPPLK KAFKEVKERC  
NLNIELPF\*

>SPBIB\_v1\_240001|ID:27163131| protein of unknown function [Uncultured spirochete bib]  
MARTPYREIWGIERAAEEVWNWEKVVISALNLV\*

>SPBIB\_v1\_240002|ID:27163132| conserved membrane protein of unknown function [Uncultured spirochete bib]  
MAKSRLHKL YRSILSTLSFSAELRKMRELNAKIDQPESITPPPPFHPQGANRWFKRRRI  
TIAESYLMVVRDLDSRHSSARLDALRKLADVAFHSANIDYPLNTARVQSALIKEVVKHRS  
NKRRQLELLYDFSMSTRGQH QVIRKLCDELNIELPEKGMQIGDLGYGWDGHVHDTATSG  
RKNPTQLIIDAFIKGISRVTVAYGSVSDLDMMEEALEAGNILGLHVSIALEFSVMVDGAR  
YHFMAELPRFNSKEELRGFFSSHASDLTSFFQGLDINRENRLDAVRRLLET FNADTLPTI  
NEGFEHKPEYCLAPLSDEL LATIPNMNITPLHLAEFMYMR YRPVLQKR VWFYKVLREKI  
RSSSLADPARKAEKDTIEK KYAELRKELRNLSPDTLLSEYFEDPHAISYQTVFEDIESLS  
DMLHQAGCTIKFIH PLEYGVEKATRVLEQCSHCIDSAEVYNTQDCAGRSPEEVEAFARIF  
NERNKRAHSGR KVIIPVCGSDATGRNPKIPGMGFVFEDRIIGKLRQR YIKRHVALPPLV  
SAMVRAEDAPVDEEHL DLRVPCIISM GKVSAGEGYTSTSEDEVIGPVRAWRYFNPAFKN  
TIRTLIGFFVAT SFIGPWYALLWLGITGFRNSIADLISYRGTRLN QWKLKSINFDNVAQS  
LFWTGFSPILGFVKANFD AIWPVHDGFVFNLVKFFFISFANGLYLASHNTLRGFDKSV  
VRANIFRSILAWPLATV FAPLGNALAI PSIVQTKIWSDVVAGFIEGGNKYRKVLRQRQKT  
LEEIPTIIHSGSTQYIAML DILYLFSEPRMQSIIKAVLSPYVLFTRRLRKNSSLRLT  
LLVELHKTMC EERVWTELIDYIVANYDEEMADDLVDL VADALPDLQEWLGHLIAKYGESS  
GLLKKFGIGRK\*

>SPBIB\_v1\_240003|ID:27163133| protein of unknown function [Uncultured spirochete bib]  
LDSVLQSRRYKAVCGRAGW MAPQETT VQPLAAVEETVDAPETADGAWLARRNGSPFR AFN  
QRGPWWNSGAQH MNYAFP KKYFDSMGLVSMIDRLCLSR\*

>SPBIB\_v1\_240004|ID:27163134| RNA-directed DNA polymerase and maturase, group II intron origin (fragment)  
[Uncultured spirochete bib]

VTRTEETNPETTKLIERL VERGTMREAYARVVG NKGAAAGVDKMTVEALKPWLQAHWVEVK  
GRLLRGT YRPEVVRGVEIPKPNGGKRQLGIPTVVDRFIQQALHQILSPIFEPEFSANSYG  
FRPGRGAHDAIRK AKEYQLAGKRWVVDIDLAKFFDEVNHDLLMARI AKKVRD KKVLRRLIR  
RYLQAGIMKDG VVWDRDKGTPQGGPLSPLSNIMLDALDKELEKRGLSFCRYADDCNIYV  
GSERAGMRVMESITRFIEGTLKLVNREKSAVARPWERKYL GYSFTNERKVRIQVSASSI



ERFKEKVKALFRGAHGRNLGRFIRETINPFVVRGWIQYYSLADTKQFAEELDGWLRRLRC  
NLWRQWKRPWTRLKRLMERGLPEETAVRSAPLTS AARGGTLAPST\*

>SPBIB\_v1\_240005|ID:27163135|serC| Phosphoserine aminotransferase [Uncultured spirochete bib]  
MKRVINFNAGPAAIPLEVLQKAQEEMLDWNGTGMSVMEVSHRSKEYEAMHNEAQDLFRKL  
AGMGPEWKILFLTGGASSQFFMIPMNYLFGGRKATYLV TGHWGKAAIKEAKHFGPFDVLT  
TENPDGTFTRVLRQDEIKIDPSSTYVHMTSNNTIFGSQWHYWPEVGKVPLVCDMSSDIFS  
RPPFADKFSLIYAGAQN LGPSGVTVV AIREDFYNLAQEQA KLPTMLSFRTHAENNSLYN  
TPPCFSIYILNLT LKWLNTVGGLDKMAKINEEKARILYQAIDNSDGFYCGPVEKDSRSQ  
MNVVFRLATPEMEETFVKEAKAADIIGVKGHRSTGGIRFSTYNANLVENVKKAADFMEEF  
RRKHR\*

>SPBIB\_v1\_240006|ID:27163136| D-isomer specific 2-hydroxyacid dehydrogenase NAD-binding protein [Uncultured spirochete bib]

MVILLADAFAPDLPGR LATFG EVTSDMSRLGDAEVLIVRSKTKVDKAMIDAAPKCRYIIR  
GGVGVDTIDVEYAKSKGIAVDNTPEASSLAVAELAFALMIAMPNHLVRADNSMKEGKWLK  
KELERTELNGKTLGLIGRIGHELALRAKAFGMSVIA YDKYVTSSEVASLVSLDEVYAK  
SDYISLHTPLTDETRGMINAASI AKMKKG VYLINTCRGQVVVEQDIADALNSGKMAGYAT  
DVYNKEPPEGSPLLKAPNVLMTPHLGASTEENLLRLGDSIVARLKKYSGK\*

>SPBIB\_v1\_240007|ID:27163137| conserved protein of unknown function [Uncultured spirochete bib]

MIGARERLERMGVTVPEIYLPSAGIDYRKWAVVACDQYSSEREY WEDANREIGEAPSTLR  
LIFPECYLEDADKDARIANIQR TMREYLEKGILESKGYAFVLVERTTPFEAKPRLGLVVA  
IDLERYQY GKDSKSLIRPTEGTIVERLPPRMAIRRGAALELPHIMILIDDPARTVIEPMY  
ERRQYFERAYDFDLMKNSGHVVRGWL VREENQLARVAEALERLADPKAFRAKYGKDEVLLF  
AVGDGNHSLATAKAIWEETKAA YAGSPGAEAILAQHPARYALVELVNL YDEGLPFHPIHR  
VLFNIDAQDFLKKLVEAGANIA YMPDAAQAFAAVDASA AKDAGSSHVFAFVSDSRAGTIT  
FETPRARLAVATI QEHIDAYRASHSEVGIDYIHGTASTETLGRKKGNLGLYLPPVDKSSF  
FSVVIHDGVMPRKTF SMGEAPEKRFYIEARRITND\*

>SPBIB\_v1\_240008|ID:27163138| exported protein of unknown function [Uncultured spirochete bib]

MSKMPANKGKIVL FVLGATAANL VLMAACFALLMV FYSLALS KILPPEALIWAIAVAFLL  
ALVISTLVYRKLLKFLRDRYHLDEYLGIPSK\*

>SPBIB\_v1\_240009|ID:27163139|spA| Lipoprotein signal peptidase [Uncultured spirochete bib]

MKKAIFWAPLVCAVLIIADQIVKALV VSHIPEGRIYARFFGDFVWIVHARNTGAAFSLG  
ASSAPLVRFLFFIALPVVVLGGVLVYYFRAAHLTLLLRWSMGLILGGGIGNLIDRIFRPE  
GVVDFISLKMYGFLGMERFATFNIADSAITIGEILLIIGLLIAELQRSKVHPS\*

>SPBIB\_v1\_240010|ID:27163140| putative GTP cyclohydrolase 1 type 2 [Uncultured spirochete bib]

MTITEFDAWARSFLEIDQLQQIDDSLNGIQVSCSSAKQIKKLAVAVDACAESIRRAHAAG  
ADLLFVHHGMFWGKPEPVSGSLRERLKM LLEFDMGLYACHLPLDRHPEVGNNAQLVNLG  
VTERRPFGIYHGITIGWAGTLPNPM SLDEILKILPDRSSPKSVIAAGPSEINTVAIVSG  
GAPFESLEALAAGIDL YITGEPSSHVYHYMLEGGMNFVAAGHYATETWGVKAVA EKAHAE  
LGL ETIFIDLPTGL\*

>SPBIB\_v1\_240011|ID:27163141| protein of unknown function [Uncultured spirochete bib]

MIYWNADLAAKISCSRQEMETLLPYIDHLVDVSRTLHQ TGIQPSADQFSSEKDIFFRYGL  
LLVSEGLAGDILEEILAVLLYVSEEKGIAFLRQCVAAEAILSIANGDDQDTLLRKLLPYC  
GVDRALAALAKGKTEHAD\*

>SPBIB\_v1\_240012|ID:27163142| protein of unknown function [Uncultured spirochete bib]

MLIERLGHMYALWGPSGKAPER NPRIDQTIQSVRRFIAAIQETS EDRKALFTQSQQSRRK  
AMKLAYLLLASESDAAAIRDAFLSSGLSSGQRASKLDALIWL AGTEAASRGIHYPY TIFL  
IMTAFFGPAAAETELRWLQEKAKATIPTLEEFIVPGDLTD TIEEALKEPARLQRTIRIAG  
MPLSASAFAGCSLYYIEKILVLIGPIGASILAEMIHSARQLMSDEISTAQQAFDLFAQ  
EEGETEAPENQRIKGLEAFEEEEVFADPDLIRSTTKIVMLAEAKVLKATLSSMSDNEIAS  
ILRCMEAIAHERLLSLISPRGQKHVLTVIQKTGNTTNSRMLRDAQLFAQKLLASYAPKNL  
KPGESLSIPEEVRALISSLLSRE\*

>SPBIB\_v1\_240013|ID:27163143|proC| Pyrroline-5-carboxylate reductase [Uncultured spirochete bib]

MRYKLGII GAGKIGEAILAGSLAKGLLAPSDVILSVRTEQHRQNLEEKYHAATV LHNREV  
AKQSEILISVKPRTIFEVLQEIADIIPDES VVVSTAAGVTLESMQTRLARKIALIRAMP

NLGVSVCEGMTALAPARFTEEDKVEKVKQLFESVGRAIVLDEQYMDAVTGLSGSGPAYVY  
LIIERALADGGVVKMGLPREVSIELAAQTVLGAAKTVLVTGEHPAKLKDQVTTTPAGSTIDGL  
MELEDGGLRVTLIKAVVKATERAHQLLHK\*

>SPBIB\_v1\_240014|ID:27163144|dapD| 2,3,4,5-tetrahydropyridine-2,6-dicarboxylate N-succinyltransferase  
[Uncultured spirochete bib]

MNSAADELKRIFEESGSFCDAHWVFLDALEKGEIRVVEQQADGSWKVNSWVKTAILS GF  
KKGGLSAWPWPASSPAAALGSDPGSASPSGKTIKSSGSRGEEENGFFDRPAFPFRHFE  
IGDGVRMVPGGSSVRRGAFVASGVVIMPPSYINVGAWVDEGTMVDSHVLVGSCAHIGKRV  
HLSAGVQIGGVLEPPQASPVIIEDGAFIGGMCGIFEGIIVRKRAVLAPGVIIITKGTKLFD  
LVNGRELSGEVPENAVVVS GTRPAHGEFASEKGISLSVPCIVKYRDEKTESSVVLESALR  
G\*

>SPBIB\_v1\_240015|ID:27163145|dapA| 4-hydroxy-tetrahydrodipicolinate synthase [Uncultured spirochete bib]

MKQKIEGLGVAIATPFDDAFNVDYAGFERLLDFLCGRDFESAAGEYAEAAFRDEAARAKF  
QRFWQAESGGADFIVVLGSGTGEATVEPDERRELIRRAVKRILGIPIVVGTSNSTKAAV  
RLTEEAVDLGADAVLVVVPYYNKPTPGGLNAHFEAVAKAARGKPVVYVNPGRGTGLNLVP  
AVLNQLWQISGVEAVKESGNLAQIGEICRTLPQGKTVLSGDDGLALPAI AVGAEGLVSV  
AANILPRRYKALVDAARAGRREAKALHARLLPFTDALFLESNPIPLKAALKLTGLCGEA  
VRLPLAPAVQTTRERLASVLAALGARELA\*

>SPBIB\_v1\_240016|ID:27163146| putative 4-hydroxy-tetrahydrodipicolinate reductase [Uncultured spirochete bib]

MQIGIFGAGKLATAIAEEANALNVKAGSSADVVRFDIVWMVDMGDPMPSRHADVAIDASV  
PDAVEAHLAWAIDTGTPIVATTGWEIPDIAARVVGQKTA VLVSPNFSFAVTFMRRMATQL  
ATFVDWYGEGLAVFEHHHA AKKDAPSGTAKSLAQAIISGSKRYAGWNASGWEQWDMSKV  
PIASLRAGTETGVHEL VFDAPHEQLSIVHRARNRRVFASGALCAAQWIQGRKGVFGMDDV  
LESLLGNA\*

>SPBIB\_v1\_240017|ID:27163147| Aspartokinase [Uncultured spirochete bib]

MTALVMKFGGTSVGNAERIREVARIVQSRQGRKRIVVVSAMAGITNLLFEMAEARQHDL  
DRAVQILSKIEQMHLASRLDLATPDIIGRIKEIVENLQRRIHGIDLLGELSPRTMDEV  
ASSGERLSSILVAGYLGCPDLLDARKVIRTDSHFGTARPKLAAIKKLAALHIVPLLESYDI  
IVTQGYIGSEDAGDTTTLGRGSDYSAGLIGAALQADEIEIWT DVEGILTADPRLVPSAR  
TVEVLSYQEAELASYGAKVLHPATVRPALDAGIPVTIRSTFKPDGMYSTISPGESSGRP  
CVAIAMRRNVVVISVTQESMTDQAGFLAKLFDVFGRRGVSVDLVSTSEICVSVSLDKSAP  
LEALTQDLEKLGQVSIARERAVIAVVGDLLRKTPEVLRKTFIAIDGIPVDLISMGANAIN  
LSLIVQEAQADRAVQNLHAAFFEEGER\*

>SPBIB\_v1\_240018|ID:27163148|asd| Aspartate-semialdehyde dehydrogenase [Uncultured spirochete bib]

MANIQHHS AFSPKKKIPVTILGATGVVGRFLRRIAHPWFYPAFLAASDRSAGKTYSEA  
CQWHLPLPYAGCGDMVVVPCSPAAAFSPVFSALDAGPARDIEPLFAAKGAYVFSNASA  
FRMDEDVPLLIPELNPEHFGLLENQKAKRGWKGAIVTNPNCCTVMLAAPLAALQSRFGID  
AVMVTSMQAISGAGYGPVPALDIVGNVPIRNEEPKVESES NKILGTLTAGLGLAITP  
APFVVSATCTRVVIDGHTLSISVRLAAKATIDEVAEAFTLFEPKTAPYSLPSAPEKFLQ  
FLKAEDRPQARKDVEEDSGMRISVGRRLRTPILD FKFISLGHNTERGAAGASVLNAEMAL  
AMGVLQGVGE\*

>SPBIB\_v1\_240019|ID:27163149| protein of unknown function [Uncultured spirochete bib]

MSLSISNAMNSFSRALLRSDEPGIAIGEYLNELSQLRPLSYAACGRSTHQESLRCIVLG  
GDEQVYGSNIAVGDEVRLGAAPCGFALEVDEC VQKRIREGIVIEAPAKQNGSTAFVLSMM  
FSADAPELLLSASQALRTAAQLVEEYLSMRARLAEIERDSGRPVGSDPVL TWCGIVGN  
SDVMREVFTMVEQVAGTDASVLLLGESGTGKELVARAIHQKSSRANNPFVAVNCAALPES  
VIESELFGEKGAFTGAFEQRKGRFEQANGGTLFLDEIGELSPGLQVKLLRFLQDHRFER  
VGGNTSIEANVRVIAATNRNLQESVDQGD FRPDLYYRLNVFPINIPPLRERADILLAD  
HFVAKFNRENTK KIQRISTPALDLLMIYHWPGNVRELENCILRAAILSTDGVIHAYHLPP  
SLQSAASTGTEPSTGLDAAIARLEKELIIEALKLENGNAAAAARRLGATERRVRYAMQRY  
RIDARRFKTKL\*

>SPBIB\_v1\_240020|ID:27163150|glnA| Glutamine synthetase [Uncultured spirochete bib]

MNDASSTFSLPDHFGSRCFSNDVMRERLPRSAFEAILEIQAGKRELTDIAEIVAAAMKE  
WASDLGATHYTHWFHPLSGLTAEKHESFVSPQPNGGMLMEFSGKELVKGEPDASSFASGG

LRATFEARGYTAWDVTSPAFLKRNADRYVLCIPTAFVSYAGHALDKKVPLLRSM EAINRA  
GLRLLRLLGDTESERIITYAGPEQEYFLVNAELYRKRPDLLCGRTVLGTMAAKGQELED  
HYYGAIEEKAAAFMNELNSELWAMGISAKTQHNEVAPNQFEIACIYSQANIAADANQLVM  
ETIRKVAEHHGMAALLHEKPFAGINGS GKHNWSIGTDKGANLLDPGEVANAPNEKDAAY  
KFMRFVLFSLAVIEAVDRRAGLLRAATATAGNDRRLGGHEAPPAILSVYLGDP LHDLFDS  
LETQNGAQKIANAFLELGIRSLPKLPKDFSDRNRTSPFAFTGNKFEFRMVGSSQS VATPL  
TMLNAVAEAEIEHIALDIEQELSKGISILDAARLAARKSWQEHRRVVFNGNGYSAEW TRE  
AEKRGLPMFRSAVDAIQELTKADNVRMLTSLGIFLAEETEARQVVYLERYSKQIKIEAGM  
TIDLVRRSVIPATSEAASTRYSAACTNIASLGAPSVIQETLAKRIAQLTGKAAEALDRLEK  
TLNDASHIEDELERAKAFRDSVVPRTDEVREICDELERLTPKDLWPLPTYGELLFTL\*

>SPBIB\_v1\_240021|ID:27163151| membrane protein of unknown function [Uncultured spirochete bib]

MKFLRSLVPWILVIVILAALYLPDLGPENYKDFDSFFANERIRQGIAGYEVAIIKDGEI  
AFNKAYGFDGERKTLESATPLYLGPASEILTGTLQCQVNEKKITLDAPIAQFIPELASL  
KARRASSAALDMPLTLRQLAAHRVAFPEKDLAAFDPGTTGLEAGLPDPELFLKSHFPTEK  
YTRSRLSYRIVGAILEKATGKPYSDLLES MITIPLGMYLTTAKPSSIAQI AVGSGSFFGL  
SFPYREKVPIDAAASDGIVTTSADIAKFLKFV VSPQRGQAIPGLSSSQTPLLYQPLYKDG  
DTGFGWRILESKDGRFIFQGSIRGYASRIVIYPERNAAILSSQNGILISNFILPMLV  
TSAEQILFNGESRPPFPSWRAELVAGFIFFIYLLS IILQTLSSYSWARDLLKYRESSISQ  
LYARFAFARTIGLLLRVLA VVLAPFAAGYLVGRAVPYQELIAFEPGIASVLMTAMLFGV  
IRNISRIILYMRLRRA\*

>SPBIB\_v1\_240022|ID:27163152|livF| leucine/isoleucine/valine transporter subunit ; ATP-binding component of ABC superfamily [Uncultured spirochete bib]

MLEIQNLSVHYGGIHALQGIDLSVPEGKIVTLIGANGAGKSTTLRTIVGLVKPTGGKVLL  
RDNVISGRQTQEIVQMGIVLVPEGRRIFPNLTVEENLLGAYARNDKEGV LKDLHDVYDL  
FPRLRERRLQKGGT LSGGEQQLAVGRGLMSRPKLLMMDEPSLGLAPLIVKMIFEIIRQI  
NAEGTTVLLVEQNAKAALEIADYGYVLETGRITLQGKGRELLSDDRVRKAYLGEAQ\*

>SPBIB\_v1\_240023|ID:27163153|livG| leucine/isoleucine/valine transporter subunit ; ATP-binding component of ABC superfamily [Uncultured spirochete bib]

MSENTSDLMLSTAHLTMKFGGLTAVSDLNLEIRKNEIVGLIGPNGAGKTTAFNVITGMY  
PTEGKVLFKSRDITGLKPHSITALGIARTFQNI RLFKEMSVLENV LVACHMSINTGIFGA  
TLHLPGYRSRESEARRFSMELLEK VGLVHLAYEKGTSLPYGQQRRL EIVRALATKPKILL  
LDEPAAGMNPQESRELMDFIRKIRDEFDLTIFLIEHHMQVVMGVCEHMYVLDYGV TIAHG  
DPASIQKNPKVIEAYLGVD\*

>SPBIB\_v1\_240024|ID:27163154| ABC-type transporter, integral membrane subunit [Uncultured spirochete bib]

MKATTGKQPFALTRNKLLTIIALAAFAVLAIANSFFDAFTLRVFNMC AIYIVLALS LNL  
LNGFTGLFSLGHAGFMAVGAYVCALLTMTPEL KEMNYFLVPIVPWLRNITIPFLPAILIA  
GLASAFVGF LIGAPVLRRLRDDYLAIATLGFGEIIRVLITNAQPITNGA QGLKGLPRYATT  
FSVWVAAGLVTLFMVLLMRSSYGRAMKAVRDELA AEAMGINVFRVKVTSFTVSSFLAGV  
GGALLGHMITTIDPKMFTFMLTFNILLIVVLGGIGSISGSVISAI VVTILMEALRFLDEP  
MNLIFFKTEGLPGLRMV VFSILLMVMVIYRQRGLMGNKEFSWDMLQGLFVKKGRKGGDHV

\*

>SPBIB\_v1\_240025|ID:27163155|livH| leucine/isoleucine/valine transporter subunit ; membrane component of ABC superfamily [Uncultured spirochete bib]

MTLSLLFQHIVNALSLSGLYALIAIGYTMVYGILRLINFAHGDFMLGAYVAFYGITLVS  
LPWWAALLVSIAFTALFGIGLERVAYKPLRDS PRISIMISAIGASFLLES LAVLIFGGRP  
KGVVPDVL SKVIHFGSVSMITISLIPLFTFALLGVLVWIVNKTKTG MAMRAVSTDIEA  
ARLMAVDVNKVVSFTFGIGSLLAAFGGIMWSFKYPQLNPLMGMM PGLKCFIAAVIGGIGS  
IGGAVMGGFLLGIIEMIVAFPLT LSGYRDAFAFILLIVVLLVKPTG LLGKRQAEKV\*

>SPBIB\_v1\_240026|ID:27163156| Extracellular ligand-binding receptor [Uncultured spirochete bib]

MKKAVGCMLLVLGIAALIVACGPAAPKTVKFGVFEPLTGANAGGGALEVEGIKLANEMYP  
TVKVGDKYKIELVIADNKSDKVEAANA AQRLVDKDKVNVVLG SWGSSLSMAAGPIVKNA  
KVS AIGLSCTNPLVTKGNEY YFRVCFIDPFQGTVMANYAFKNLNAKKAVIIREVSNDYSV  
GLAKFFADSFKQLTG DENAILAELNYNTGDTDFSAQLTEVKKFKPDVIFAPGNYTESALI  
IKQAKELGIKTQFLGGDTWETPEFIDVGKQAVEGVVSTFFATETPITDTSKVFLDAYRQ

KYNKEPAAVTALGFDGYLVARDAIQRAGSLDKEKVRAAIAVTKDFPGATGMITL NEDGDA  
VKS AVIKTIKDGKFTYMATVQPY\*

>SPBIB\_v1\_240027|ID:27163157| conserved protein of unknown function [Uncultured spirochete bib]  
MERYDVVIVGTGPAGLGA AFELLGRKPSLRILLDDKLQVSSGGLRNDCKMNFTWPIGFPL  
ECWDEATGTYYLKRVEAFLEPRIMEKRNIDVYARRAEKIGVKLIDVRQSHLGT DGGLELI  
KALTARLTALGAEISLGEEMLSVDQATRTVQTDKRAVQYRYLLVAPGRGGFAFLQQLMEH  
LGVEYRDNVVDIGIRVETREEHYPIVRDYYDPKFLFPKTRTFCTNSRSAHV VQEKEYGDE  
KGGYWYSVNGHAWSEQRAANGLVNFILKTVTLTQPLASGQEYAQMLGRLAALLGGGRPI  
MQRIGDFRLGKRSFADEFTGDLYDFKPTLP SCTPGDISLCIPAKTMRAIWNAMKLLD TVV  
PGVMHPSTIMYYPEIKLYANRPVFIDEYFQVVPGIFFAGDGAGTSRGITAAWASGLRAAD  
GMLKEFDF\*

>SPBIB\_v1\_240028|ID:27163158| conserved protein of unknown function [Uncultured spirochete bib]  
MSEHFMIDKDKQKQLQNIILKLHQGASVAEVKKEFATLIQGVSAAEVAQMEQALIDNGMP  
VEEIQHLCEVHVEVFKASLDKEKISSKVP GHPVQTMLDENKAARARLRALKKAVLAWRFG  
LGQKEQVLAALDDMSKIIVHYTRKENQLFPYLEKKEFTGPSRVMWGKHDEIRALFKEAHS  
KVEQNDKSAISSLHPLAGKISRMI FMEEHILPEAVRRLSDEEWAHIRIGEDAIGFAWIR  
PGAVYDPYLVLAGAVTAKPQPA AAIPESTAIPAVGATHHASPVPASDLVELATGKVPAGL  
LSAALATMPVDISIVDAQDKV VYYSDSPDRIFPRSPAVIGRAVQNCHPQKSVATVNRILD  
AFRKKEKTRARFWLEMGRFILIEYRALYDAAGAYIGTLEFSQDLTELRTLQGQRLLDW  
D\*

>SPBIB\_v1\_240029|ID:27163159| protein of unknown function [Uncultured spirochete bib]  
MKAFDSADLAGISIGSSLDGFQK KLAGSGISFTDYVRESHIRKWTGEALAHALKIRTALV  
LGLQEFLVSQNILNIDRVSMSPVTDPLCHNVEHAPVILFQNTPT YRTTHSMIYSKMLACMN  
PFVPGVYIDSPNIRLELPSETARHKYLIDFSQMDIELKRSRKLTPEDYFDRPEVTKAELE  
QERDRALDFEDLIYAVKKILAFAPESLRALGVT LAVPQKPFPRFFKDEEEDHDASSLE  
ERLGQKAGVQFFWVLGLLRENYDLVYPYLSRDGKRPPKASITSRQIFNYDLCAAPLYQDG  
SLGRAYEVLSSGGLREWVYEAIVARLLDNGILREEPQFDDHGNLLNMATLDGYGPFLTVAR  
MCDEKGEGLFPETFGGGLGIERTL FALLHGPSVKDIDELTCFGKNPDKVLPFLF\*

>SPBIB\_v1\_240030|ID:27163160| protein of unknown function [Uncultured spirochete bib]  
MMNIFCNTIGTGVPGIGIAIYAPIEINA AKRHAIIFVLSLFSMLSIGRTMAKKYV FVNTA  
QRGTA\*

>SPBIB\_v1\_240031|ID:27163161|bioY| Biotin transporter BioY [Uncultured spirochete bib]  
MESMNERLTNAIIACLFAALISIGAYIAIPIPGTPVPIVLQNMFI LA AFILGPWWGLAA  
VVFYLVLGAVGMPVFSGGTGGLVKFAGPTGGYLVGYIPAVVAMGLLSRLGKSRWYFNMLA  
GIAGMAIVYLFVARLKA VLHVDWAKALATGLIPFIPGDIAKIAVAGILAPPILKALSQI  
EQSTNA\*

>SPBIB\_v1\_240032|ID:27163162|cbiO| Cobalt import ATP-binding protein CbiO [Uncultured spirochete bib]  
MPELFRADALRHVFPDGTAAIDNVSL SIAEGEFLIAGRNGAGKSLLMRHFIGLSKPSSG  
AVFYRGQPVPAQIPLIRREVG YVFDTEAQIFGQTV EEDLAFGPANLGMQGDLEDAVQH  
ALKEAHLEGMENRRPNTLSGGEKRRLAIAGV LAMSPRCVILDEPFANLDFPSVQEILAVL  
EVLRAEGKTLIVLTHEIEKVFALATRLVILDKGHIVFDAPPGEAQQSDFGSSGLVCPYQE  
CYPWLMTH\*

>SPBIB\_v1\_240033|ID:27163163| membrane protein of unknown function [Uncultured spirochete bib]  
MADDTLNPFAFEAGKSWLAVFHPVAKLAFLIAVASAAMRSEPGLLAALFLIAFIGQFSMP  
RAGKGALYSISVLILFSALVRGILPGDGRIFDVGTLSDSAIYALRLLTVYLYSRLFYATT  
RVSEIGDWMTAFTRTMRRIVGVGQRDVSAQSSAAA AVNNRPTIHSNNIRQASILSDPGML  
FSLVLLFLPRIFD TYQRIKEAGEVRAINLSRRNLRRSLAMLEQLIIASIVQAWRTAAAME  
IRAYSPARTLRLQKFAWGDWAMAGAAIALLFLAKL\*

>SPBIB\_v1\_240034|ID:27163164| putative Adenylate/guanylate cyclase with Chase sensor [Uncultured spirochete bib]  
MEHDRSSMPEFHSAMSRKARFFWALAVGLGIMLVFLWLGATEHLGMAIYDSQMRAHAAPT  
KRSAMSSGGAQSAEHGKIALVMIDQSSLDWVQKELGLGWPPRELYGILAGYLRDAEAQ  
AYDILFTEPSTFGPEDDAKCAQAMTEAGNVV LATLASKKPVLDV PNALSGHVAAIVDSDG  
ICRKYQAWMSQDDRRLLSLGLAAVSKSSNPKEL AASLPADGAVLLKFGSPARFERYSAAQ  
VIAAAMDSVQGNAKGSATGEASPQSPQIDFS GKVVVVGLSAPGLMDRQATPIDPALPGM

EIHATFIDNMFNHTFMQRTPIWLEMLV GALGAALMAFAPMVHKRLIAALAVIIAVGTPIA  
LCLVLFGNLVFFNPISALVA AFAALVA AIGLGYQA EGRQKAYLRR AFAQYLSPEVISSLV  
DQPETLQLGGELKTITTLFTDMVGFTSASEKLNPTQLAAFMNEYLGIISEILAMGGTLD  
KYVGDAVVAFWNAPLSVDDHAYRALATAVRIQARLGAASKELEQRYGIAPRTRIGVATGK  
AIVGNLGSRRFAYTAVGDSVNIA SRLEAANKAIGTSILTMRDTVQHAIRNAEPSSSTE  
EIALGLPEGGAMIVRRLGLASVEGKEQPVELWSVEHSHGVSVEPWGVRRIPK\*

>SPBIB\_v1\_240035|ID:27163165| putative Peptidase, M48 family [Uncultured spirochete bib]  
VHVVSLRSRSLVAVLAGLVLALATLLFSSCTVSPEALQLFLNQALLQGMITPEQARLIRE  
AARSFQTESRPFTYEEYEAIGRVVAAA VLSQYPVYNQPELTAYVNKIGQGLSFFSARPLL  
PQGYHILILDSDEAHFAAPGGFVLVTRGLLSLATSEDMLAALLAHEISHTALGHGLVSL  
ASYRMGDLAMYAALSTQAANTENKETAALFSAAVHDFVSLISVQGY SQAMEFEADAEAM  
HILYEAGYRTSALKELVSALADTQNEHIQQYSMQHPLPADRLARIAVLEQQYEQA AELKA  
RRAAARNTAGMFRLESQFSDIGYPASEGSVLEASINAFGPRPQVFGTVAPLELIRRERFE  
AMKRLF\*

>SPBIB\_v1\_240036|ID:27163166| conserved exported protein of unknown function [Uncultured spirochete bib]  
MKHRFSILIVLVMVIAAVTYAQGKPAETTMLIRVEKTAVRATPSFASPVLLFAAYRTPVA  
VVQIENGWVLGFVQGLSKPGYIHISALAPAKVSLSSDAASAPPLQESEIVLAGKGFSS  
LESALKEGNAFNDAVDEMEKLTYSFAECLAIFIQIGIDFSPGEL\*

>SPBIB\_v1\_240037|ID:27163167| Exonuclease I [Uncultured spirochete bib]  
MPATMLWYDLETFGRDPQH DRIAQCALIRTNEALEE IADPIVLYCRLPPDYLPDPEACYI  
HGITPQEAERKGISEYEFALRIMHEMAVPNTTVVGYNSIQFDDEFIRRLFYRNLLDPYVR  
EWKNDNSRWDIINLMRAVHDLKHEGFEPVNGDGNPSFRLEELAKANNIAHETAHDALFD  
VRATIGLAKKVQHTY PRLYEWYHHRRRENLA PLVNL SLREHMLVHTSQLYTRPNGCTTV  
IAPLGLVEADRHALVAYDLRFKPEPFAQMS EDEL RDLLF TERLEGATGPQRPPITMIRLN  
SCPYLAPVKALTKDSSKRLGIDIEQCRQNLRELEA VPGLKERLIAAYRHEKKTSEELDPE  
YALYGGGFYPDEDRKELERFHEVLREQGPHAAKNEFLRITYRDQRIPTLMGRLLARNFPE  
TLTAEQHVS WRKHASGWVQLPLEKGATALADYAQLEAQIAQMREDDPRKPIARALLDWKA  
HIEDFIRER\*

>SPBIB\_v1\_240038|ID:27163168| conserved protein of unknown function [Uncultured spirochete bib]  
MKRQELVYQLISELANYLLHGNPKKMVISLHMEADGFHIAAIDDRPRTDSEIAEIEHSLM  
IQRPELASYYGTMVGHDL LGTARLEMIGWQIKGVKLERIPEGGIMINLWIGSEGFDPKM  
FTLEQGT\*

>SPBIB\_v1\_240039|ID:27163169| conserved membrane protein of unknown function [Uncultured spirochete bib]  
MVQGTKTLKVFAVTVMVLVLLAGIIDGDVGPVQGFIRLQVTPARLVSD FVAVEGVGATL  
FNVAAVGFLGYFFLLNGL EITGAALALFTMMGFAFFGKTLFNCIPIMAGVSLSALIVK  
KKPRDYALIAMFGTAMGPLITFLAFEVGVKPVFALPGSFLIGLIGIILPPIAIAMLRLH  
QGYNLVNVGLTAGFVGLFTASLSHAAGADILPLSMWGTEREPLLIAIVPAIVLIAVVCIV  
AENPGHGHSNIGQAGR DMLKIMAMSGRLPSDFSD FVSSKGALLNASIIGLLFWIFMVALG  
APLNGPVLGGLFTLIGFAFFGKHPKNVFPVVLGIIAIFVFGKSILAPGPLLAILFGTAL  
APLAGEFGPVIGFVAGFLHLVIVDRTGAWHGGMDLYNNGFAAGLTATLIVSIIDWYKSSK  
SD\*

>SPBIB\_v1\_240040|ID:27163170| NAD-dependent aldehyde dehydrogenase [Uncultured spirochete bib]  
MNNGIFHIPRPVNEPVFN YAPGSPERAALKQEIERLRKDRMDIPLIIGGKEVRTEKTAPI  
RRPDAHNEVLGVYHIAGEEEARMAIKAALDAKAEWAALPWEERA AVFLRAAELISVKYRA  
LMDAATMLCQSKTAHQAEIDAVCEVIDFLRFNPWYMEQIYNQ QPDNAKGEWNRSA YRPLE  
GFVYAVTPFNFTSIAANLPTAPAMMGNVVWKPASNAVYSNYMLMKLYMEAGLPPGVIN  
LPGSGGAISNVVLS SPDFAGFHFTGSTE VFRSLWKQISSNLEQYYVYPRIVGETGGKDFI  
FIDPSAELANTVTAVVRGAF EYQGQKCSAASRLYIPASRSKEFIDALVAEISAIPMGEIT  
DFRNFGAVIDEAAFNTICGYIERARTS GEAKVIAGGACDKSRGWFI EPTLILTENPRSE  
SMVNEIFGPVLTAYVYDDHDMEAA YRLVDSTSPYGLTGAIMATDRQRINRALLALQNAAG  
NLYINDKPTGAVVGRQPF GGARASGTNDKAGSYLNLLRWVSAVAIKENFAPSSWRYPFM  
LGDD\*

>SPBIB\_v1\_240041|ID:27163171| conserved protein of unknown function [Uncultured spirochete bib]  
MKINEVVAVVTGGASGIGETVAKYFAAQGAKVVIGDVVQE QIDRVVGEIKAAGGKAVGVK

TDVTKDADVAALMDTAVTAFGAINVVVPCAGIIRDGVMINTDKETGKVKRVMETDQFRAV  
IEVNLIGSFITLREAARRMVDNKWQGVLFITSSVNVKVGQVQINYSSTKA AVAIWPRILA  
GEFQMKGIKIRVMGIAPGYVGTMPVKGMNQDALNEILKDVHIGRLIEPEEIARAIAMVV  
ENEAFDGTCLFITGGVTFGARAIK\*

>SPBIB\_v1\_240042|ID:27163172| Regulatory protein TetR [Uncultured spirochete bib]  
MVEKPPLSKRKLQARETRKRILESALSLFREKGFQVDSIDEITSAAGVSKGSFYTYFQTK  
SDIIIEFRLIDDYYQKKESAIMRSPEAVSRLIAFTKYQLDYIHKNLGFRTLSILYINQM  
SAFYDQKILANRERTLVRLVSKIIADGQASEHIRQGDPIELAEWMNRCMRGFFLDWAISK  
GSLDIRKDGMRFFSEFVLPALIAHPARQS\*

>SPBIB\_v1\_240043|ID:27163173| conserved protein of unknown function [Uncultured spirochete bib]  
MAHYRNLVFKGGGVRGIALYLGALQYLYEHNYMQHVERVAGTSAGAITALATALNLGSFDE  
LKRISDSLDFRKVPAEEDERSIRNNPPRLIALTDYRELALFKNLQCSMRLVQEKGWYSS  
DYFYKWLRALIAGQFAVEKEFYTFADFRDASLHRDGREFLNLYVTGTDITNRMARVFSFE  
TTPEMEVALAVRISMSIPLFFEAIEYQYPGTDSPQLYADGGVMWNYPVNIFDEPRFGRLQ  
ENGINQETLGGFFITSPDRTHYKPVKNMIDYVSALFESLLLQVEHLTATGEKNFGRTVFI  
DDCGVRPTDFDIDTRDDRYAALFESGYEATKDFFSAKTDWASFFRGLRARLGWKEIG\*

>SPBIB\_v1\_240044|ID:27163174| putative Methyltransferase type 11 [Uncultured spirochete bib]  
MREQRFAMSMMLTVILLFSATFTARSQTPAMAPTASTWMPHADACKEHTMALYENMASVFD  
MLFPLDRNCITALEMLVRSESGSPGSPMVLDLGAATGTLVAALNEKGNVAVGIELNPAMA  
ARAKSPVIEGSMRDAVEIARRWFSAATDTRPAADAFLDAVLCLGNTLPHLEPGERAPFF  
SNIRSLRPWAPFVIQILNYGRADIGPGFAFPEISAVNVRFSRRYAPGPAPGSLSLTRL  
RIECEIYEDTTVLYPISPSTLAALLGRAGFSHIDFYSGWSLQLFDEGKDMYCICIARL\*

>SPBIB\_v1\_240045|ID:27163175| ATPase-like, ParA/MinD [Uncultured spirochete bib]  
MSFVPEKKPNPSIKRVIGVVSQKGGVKGSMVASLLAESLASRGLRVGLLDADITGPSIPR  
MLGIDSFRAESDGEHLYPIENEDGIKVLINLFNEKEDEPVIWRGPLLAKAIDQFWSDTI  
WGDLDYLIIDFPPGTSVALTAFTQIPFSGIVVVA TPQDYVSMIVRKSVMASMLKTPVL  
GVVENMRTMVCPHCGNEVALFDDGTQNGAQRMGPLLLASLPWRKELAQSRALRWSALSEA  
ARKDADSLANEVELALASSTGAAATNTGASNVGTGASSSASPQT\*

>SPBIB\_v1\_240046|ID:27163176| Dinitrogenase iron-molybdenum cofactor biosynthesis protein (modular protein)  
[Uncultured spirochete bib]  
MDDDKLARELFAGADLVVLESDEAEALRLADLENLYQGKAAQLMGISRQTFGRILDRAHR  
KVADALLNGKALKIEQARAPCLERPPFNEKFKSGGQTPFLNLEETSMKIAFVSDDGTTIS  
QHFGRAAYYVVLTIENGKVIQKEKRSKLGHTQFSLHHEHHEHG TAGAGHGFEPGAMERH  
ASMAQAILDCKALIVGGMGAGAYQGKIQAGIEPIVTDLESIDEAAAAYIAGTLKNHIEYL  
H\*

>SPBIB\_v1\_240047|ID:27163177| Serine--glyoxylate aminotransferase protein [Uncultured spirochete bib]  
MKGKRLLMIPGPIEFTDEVLAEMSLPTLSHVDPQFIEEFGQAIEKMRKVWLAPNGQPFV  
AGSGTLAMELAAANITEPGDNVLIVHTGYFSDRMADIFRLHGANVDIVPSEVGDLPVSEV  
VRAALTIKKYKILSITHVDTSTGVRADVKNLAAA AHETGTLVVVDGVCAVAGEELRMEEW  
GVDIALTASQKAVGVPPGLALLVASSRAIDAFKARKSPVRAYYCDWQYWLPVMEAYEAR  
AA YFGTPPVNLVRALNVSLGQILSEGMDARFARHAKNARAFRAGLTAMGVKFPAREEY  
ANTLTA VWYPEGIDASVLGYIAAEGAVLAGGLHPAIKTKYFRIGHMGMSDASEILATLGA  
IERGFARAGYRFSPGSAVAAAQAVLAKG\*

>SPBIB\_v1\_240048|ID:27163178| conserved protein of unknown function [Uncultured spirochete bib]  
MYEYPMWNYFEPKDTRWYRWKLDGASIW MRKNGEWRFTLV SIPFKVIQSDARGPEQADP  
PADVSISLAVASGKKVALRPYSPPIPYLVSARNDVKIHPGTEAWFTIALPPIMRIELEG  
HALFEGSPFTTTSTWFGDKTSGNLCLSLPVELDPECKNEQGYAASSISRDEAIPADPLLQ  
ESLQKAARYLACKSLIQCRIVRNKSKEVLDLRLAIFTDL MNVYEKDGMLISDTVVITG  
TADGSLQTNIDDTSCKKLKKIYSAPKTGLNEVLIKRGVSFLRSITGL\*

>SPBIB\_v1\_240049|ID:27163179| MscS Mechanosensitive ion channel [Uncultured spirochete bib]  
MKSSILPDFFTRLYNEALTPAFWQKAIGIAFAAILLAFRILQVIVSR TLRKTMPEPKA  
QLIRKTIRYTGYYVAIASILQSMGINLSALLGAAGIAGIAIGFAAQTSVSNLISGLFLIS  
EKSFQIGDVIQAGDITGIVMSIDLLSVKLQTFDNKFVRIPNETI IKTNNV NITRFPPIRL  
DITVGVSYNSDLKKVTELLKDIAAKNMYALDNPEPLILIDKFDKSSINILLGVWFEQSKL

VDLKNSIIIDIHERFDKEGIEIPYSKMDIYIKEKP\*

>SPBIB\_v1\_240050|ID:27163180| Glyoxalase/bleomycin resistance protein/dioxygenase [Uncultured spirochete bib]  
MQFCWVTLNVNDMEKSLWFYRDIVGLPLNRTFSPAPGDQIAFLGSGETQVELIRNEKNAP  
TPFSQNIISLGFKVDSLEKTMELLKANGVPVHAGPFQPNPSVRFYVLDPNGLRVQFVEDV  
KQG\*

>SPBIB\_v1\_240051|ID:27163181| Pseudouridine synthase (fragment) [Uncultured spirochete bib]  
MPIPVMQHRKERRAPPVSKAPAGHLPAGRAQFLYEDSDLIVVDKPAGLPVIAPEGSRKT  
LYDIVTAHMQKTNPGRAAVVHRLDRDTSVMLFAKNARVKKALMDNWNKLVRRCYTAL  
VEGLMPSETGTLDSWLIENRAGQVYETKPGTRGALRAITNWKIIAAAEAGAPYSLVELELE  
TGRKHQIRAQLAAIGHVPVAGDARYGARTDPASRLCLHAHLLEFEHPFTHKVLVFESPVPK  
VFYQSENPGRPHGRL\*

>SPBIB\_v1\_240052|ID:27163182| Glucose 1-dehydrogenase [Uncultured spirochete bib]  
MSTISDLDFDTGKTVLVTGASGGLGAGIARVFAAAGAAIHFHSGRERAENLRDSLPGP  
GRHECIQADGSSENEIGSCMEQVARLCGESGLSVLINNAGVYPSSALLDIDLATWHAVMD  
TNLSSMHLFTREAAKIMRPGSAIVNIASIEGLKPVRAHAHYAVSKAAVIHYTMAAALELA  
PLGIRVNSVSPGLVDRPGLVEDWPEGYKRYVSAAPLGRVGTPEIGYSCLFLASKAADWI  
TGVNLVVDGGASVVPQ\*

>SPBIB\_v1\_240053|ID:27163183| protein of unknown function [Uncultured spirochete bib]  
MEERALWRHRASHGIHGMRLKSCEGFDELSAVWVAFKQFGPPYEREVLQGKRWRHGSAEQ  
GPSAARRETRTLNNEGWNWDFARPKI\*

>SPBIB\_v1\_240054|ID:27163184| Purine nucleoside phosphorylase (fragment) [Uncultured spirochete bib]  
MNEAVQKAINVIRPKLSSVPCLALVLGSGLVLAEEGKHATTISYADIPYFPVSTAPSAI  
LFFMEVYFDVAGLSRRHHPYPGS\*

>SPBIB\_v1\_240055|ID:27163185| Basic membrane lipoprotein [Uncultured spirochete bib]  
MKRIFITALVLSLVFALGAGAQSAPFVAMTTDANGLDGSFNDGVWAGLKKAEAEGLAR  
VKVVEAHAMTDYIPNLSGLAEDGAQLVFGVGLMVEQIQEAAKMNPKTFYAGIDHFYDDP  
IPPNLIGISYKEQEAGYLAGIVAGYMTNKYSKNSKLLNDKNVIGAVLGMDDIPPVERYLAG  
YIAGAKSVNPKVDVRYIVAGTFSRAKGEAALALADQGADIIQLIAGLTGMGVIDAARE  
RKFFALGADVQNSAAPDYVLTSALKGTTMSAYITIKDLAAGKLKGGVNRVFLAEGAID  
IAPFHQFDSIVPAEVKNAVAKAKADIASGKVKVPASLAELGIKK\*

>SPBIB\_v1\_240056|ID:27163186| Inner-membrane translocator [Uncultured spirochete bib]  
MIDFFAALLTPQLFEATVRLATPVTFAALAAVVCERSGVTNIAMEGVMLVGAFFAAWVGW  
ISGNPWLGLLGGIAASALFSLFAWVVSLLHINHVVGTAIMNILAFGLTRYLMMVFYGRQ  
GTSEAVAKTLHHYKFAIPLSDIPYVGPFFNQTPLVYLSISVFAWAWIFKRTRLGLSL  
IASGEHPMALETLGRSVYRVRYLAILISGVLCGFAGAFLSIENSNSFTEGMTNNGRFIAL  
AANIAGGWRPVGVFASLFFGFVDALQMRVQSLGIVKIPSEIFIVFPYVATIVAIAGLVR  
KSRPPAAVGKDFNIEGDGE\*

>SPBIB\_v1\_240057|ID:27163187| Inner-membrane translocator [Uncultured spirochete bib]  
VSVSAPRRIRMVLKALSLILAVPGVLLYLASYFWGAWLLCAIALYAADRFLAVGSAVFG  
SEARKLLSRAIVPVAGIGSALLIGAVIMAITGYNPISSYGALFYGGLVRNWHISVLNATP  
LIFTGLAIAFAFQGGFFNIGAEGQYYIGVIAATWMGLGSTLPGIIAIPAIFAVAAIAGAA  
LNAIPIILKVKVTKGAHEVVTMMFAVVRTLSPMFIRAHGGDPALTSHPYTTDLISESVWL  
PMFKDFLPGANYRLHIGVLLAIGAAFLVRFILMKTDLGYKIRAVGHNPVAAMTQGISVAR  
ITAASLFISGLAAIAGATQVLGLDHRMFQDLNAGYGWNGISIALLARNNPIGIIFTSLL  
WGVLDAGGQYMARTTQTPNAIIEIVKGIIFLMLAEVIYKRAGSVFGRWAGRFTAARKG  
AGA\*

>SPBIB\_v1\_240058|ID:27163188|yufO| Uncharacterized ABC transporter ATP-binding protein YufO [Uncultured spirochete bib]

MPKSDESPLVLETRGITKRFDHIIANNISIKLRKGEIIAVLGENGAGKSTLMNILFLGLY  
KPTSGSILIDGLPVSFDSPRDAIAKGLGMVHQHFMLVPTLTVTQNIIVLGKEPVRLGHVLY  
KRARRSVVELSKRYGLTVNPDARLEDLSVGLQQRVEILKALYRNARVLILDEPTAVLTPG  
EVEELFAVLRNLAADGTSIIIITHKLEEVKALSDRVYILRRGELVGEERTASASAAELAN  
FMVGRDVVLAVERPAPRPKPEPIFSLESFVHSSRGLPALKGVDLAVGRGEILGIAGVEG  
NGQKELCEVIAGLITPDSGKILFKGEDVSRWSVRRRMDAGMGYVPQDRRVSGLVLPFSVE

ENLALGRSDRPLSRHGFMKFAALRAQALQLMENYDIRTSGPEARVSTLSGGNQQKIILA  
REFSRNPDFLLISQPTRGLDVGAIEYVYRRILELKERGVAILLISMELEELFALADRIAV  
LHGGQVVFESPTATTNEAQIGEYMIRGRYSIS\*

>SPBIB\_v1\_240059|ID:27163189|mtnA| Methylthioribose-1-phosphate isomerase 1 [Uncultured spirochete bib]  
MNDSGSISASSVPRSLRWEDEEGGELYILDQTKLPGEVVEERQDSAEQVWESIRQLKVRG  
APAIGIAGAYGLVIGLKPLVDLRLREFLTQAERIAAYLNSSRPTAVNLSWALNRMLAFAR  
SNAEKAGTSAVLYKLLVGEAKLIHAEDRAICRGIGESGEVLLNEGCGVLTHCNAGALATS  
ELGTATAPMYLAFSHGKRFRVYADETRPLLQGARLTSWELKRAGLDVTLICDDMAAYVMS  
KGLVNL CIVGCDRVAANGDTANKIGTLGVAILAKHFSIPFYVACPSSTFDFATATGADIH  
IEERSAEVTSFGARETAPKEIKVMNPAFDVTPHELISGFITEKGIVRPDYRKNLERAFR  
\*

>SPBIB\_v1\_240060|ID:27163190| Transcriptional regulator [Uncultured spirochete bib]  
MLAIERRNRILEKLRNQGIITVAEMAAEFSVSEETIRRDLYKMEVTDGVRQRTYGGAYIAK  
AVRTDIPISIRENIYLPKGETIADLCATLVDEGDTVMLDSSTTSIHIADHIKTKRNIVVI  
TNSLKIVDTFANSADVKKVICAGGTLRHSQLSFVGPAERTLEAYYADKAFVSCVGLDMEK  
GATDADELEAEVRKMLNNAEKILVADATKFGKFSLSLIYPLDGINVLVTDRQPDVAVWL  
RELTAKKIECLYGTGNPE\*

>SPBIB\_v1\_240061|ID:27163191| Class II aldolase/adducin family protein (fragment) [Uncultured spirochete bib]  
MLNGMSGSIKEDICEIGRRMYASGFVAANDGNISVRVSDNQFVVTPTLVSKGFMVNPMLI  
TVDLGDHVVVEGSFKPSSSELKMHLAVYRARPVDGAVVHAHPPAATGFAVAGKALDRPYMPE  
LFVNLGVVPLAPYATPSTEEVPRSIGLIAEHNAVLLANHGVLAWGRDLAEAYSRLTIE  
LYAKILISSFAVGEPPQIPDNKLRALAQIREALGVKGDISTAM\*

>SPBIB\_v1\_240062|ID:27163192| protein of unknown function [Uncultured spirochete bib]  
VWVAGLQENAVASWLSAQAAARFTLTARSLCYFIRAPYEHVGHFGQ\*

>SPBIB\_v1\_240063|ID:27163193| conserved protein of unknown function [Uncultured spirochete bib]  
MYTVTKIVYSESAPDPEIACFLEDIYQECNRRERLELDPLAIVRRYSEPADIEVAGLVCS  
TLAFGSVELILRACEKALVPLGEHPAVALAGMRPEEISQAWGSFQYRFCFPKDMIALMTA  
IQRVLIDYGSLEVLFSGKDDGAGDRDGGGMSAAPSILSAASAFVGHRLRQFASEA VPGGLR  
QNLLPDPARGSACKRFLFLRWMVRHDEIDSGCWKSVDPARLIVPMDTHMVKTCRERLGF  
LPAASGAQVAPGGSRKGLKTSIPTLADALRVTAARLYAPDDPVKYDFALTRPGIDPRP  
GDERFGCL\*

>SPBIB\_v1\_240064|ID:27163194| exported protein of unknown function [Uncultured spirochete bib]  
MKFRFRFSIAIRRYFRAWIIIVFVMSAGTPLITEAQALPKIDTEQLKKISGESAEIEGL  
IIRATPQSITDARARIETSPYLSAPDKAALGAIASGVGLILYGPKDSRFEIPVAAQ GASQ  
KYITYLVGLVDVFAGKNPQIFASEPCSTMTELISLSYFRSAKSEVREKVN GALSRFDAL  
GGVSVVPM LIRGQTALDSKEYSIAEKEFSSALLD TKSEKSACGFARASLALGK PQA AKN  
ALDPIAAGIITSSTSAEFKALYGLTLYNLNNVLD AEA WLASALNDDPGRTEVLVPLA QAA  
IQRDYS AASRYLESAAKAFSQDRTWLVLKSQYALENS RQADAERFARS AVRYFPKDPVA  
LSQLIQALEKSTDEARHAEAADLAKAVLDLAMEDTALVPLEEARRAQAKN QALQFLVSE  
SYNHQDWARAAAYLQAAGSLPLDKNMVATILRKS GNVQASIQFASSWYAQEPGSEKA VEA  
YLRSLAMATGGGLASVAPASDVHTGLGIALSALGVGKEGSANSALLDLVLK FIAAPYSKE  
LKSFLYYMSASLQSDENKAIDQLKNAL AERADNVEALVSLADIYLARYNRQFDKRDTTNR  
DRAMRYLGQAKALSPTDKDLLARISQLEAQLK\*

>SPBIB\_v1\_240065|ID:27163195| conserved exported protein of unknown function [Uncultured spirochete bib]  
MKSANKGRGVVVFVFTSLCVLFLCFALFLSSCSNDLLAPLGIGSNDFISISNKAQAKDLRD  
ALEILHSPRLKKS GYYPVQRMLAARRISTILIEDGQQARAARFLSSLAEHDA YEAWYLF  
AAGAVYESMGSAPIARILYERIIETVPDMTIDGQSIHRTCLVKLIDSDNPPEKKTAWFKE  
FIQRFPDADEIGPFHFLLAKEYEALGQWTQAIEEYRRFLPYFGVSVPGYSDAHDYARKMV  
EFNDSPKDWTYADLGELVAGIRKAI AARSPTLRKYMSKAGFFAMS WYKEGGEDS NSNVL  
FNFSNFMTKGPIYVAPALDPSFNDSEAF LRTSGWTGYIPVWYLCFRKVNFPADPKVHGNW  
EWAGIYFGEKMQ\*

>SPBIB\_v1\_240066|ID:27163196| putative Gamma-D-glutamyl-meso-diaminopimelate peptidase [Uncultured spirochete bib]  
MIRKCCLCMLASLCIAVPLISATEAEGAFHISAVSTEGSSSALSETPSSSSAAHTPLAPA



PTSQAAPDSASIVPPEAPEELPSSPLEESQEPIDLSQLVPEELSLEEHAKSLQYDIPMPW  
GHELFEKYRQYYLSDRGRKILLSTMEKAAPFMDYIESKVAEYGAPQELAFPLVIESAFSP  
FAVSRSGATGIWQFMKNSINGYGLTITEWVDERRDFMKSTDAAIKKLIDNYNDLKDWPLA  
IAAYNAGLGALRRAVNAAGGDTDFWNIYDKGLVSKQALDYVPKFLAVASILRYPDLYGLA  
LPPRQLKWEAIPLDRQVDLKLLASKAEIPLDTLKLGNELHYTITPPDDSHLLKVPAEKS  
DQVKAILSDPNAPLVRDYIYKVKQGDTLTAISRHYGVSISMIKVNPNGLNPDRLKIGQTL  
MIPLSLQPLNPSMSSNASSGSASAQSTSHTVQKGD TLYGIARRYGTTVQKIASLNGISVN  
SVLRIGQKLKVPTQP\*

>SPBIB\_v1\_240067|ID:27163197| Acetylornithine deacetylase / succinyl-diaminopimelate desuccinylase [Uncultured spirochete bib]

MTELAQISKFLDLQEKGIIELSLTAYPALAPESGGIGEIEKAAALEKWLKAEGIQNIQ  
HYDAPDERVPSKVRPNLVATIPGKRKDSPVWIMAHLDVVPEGERSLWSDPWKVVVKDGGK  
VYGRGVEDNQQLVSSVFAALAFVKLGIVPERTIKLLFIADEEVGSKFGIQYLLEHHDLF  
SKDDIIIPDGGSPDATEIEVAEKNICWLKVTTKKGKQTHAAMPDKGANAFLAGCDLALRI  
HRLEKTAFTARDALFSPDRSTISPTKKEANVPNINTIPGEDVFYVDMRLLPVYPVSMAL  
EISRLSHAIEAEYGVKVSIDVVQSNESRATPATAPMVEMLARAARQVYGVEAKPIGIGGG  
TVGAYLRKAGYDCVWWSKMNETAHQPENADIANIIGDAKVFATLAMME\*

>SPBIB\_v1\_240068|ID:27163198|galE| UDP-glucose 4-epimerase [Uncultured spirochete bib]

MNVLVIGGAGYIGSHVARYFADRGLKIDVLDNLSTGTDKDNLFDPYSFFEEDILDYKAVAA  
IMRRGYDAVVHLAAAKAAGESMLKPEKYAVQNLGTINILNAACEAGIKKFVSSSAIY  
GEPKYLPIDEAHPKEPANFYGFTKLEIERMLEWYDRLKGLKFAALRYFNAAGYDPEGRVR  
GLEKNPANLVPVIMEVAAGLRPHLDVFGTDYPTPDGSGVRDYIHVTDLADAHYRALLQLD  
AHAESFAVNLGSEGLSVLEILEAARRITGRPIPAHITGRRPGDPATLVASSAAARKLLG  
WQAKFSDMETIATSWRAYAQHSHSHIH\*

>SPBIB\_v1\_240069|ID:27163199| protein of unknown function [Uncultured spirochete bib]

LSLTTKALISERCAECQALSSVTNLA YEFEVKASFLASIRRGGFHASFSFLPKPGX

>SPBIB\_v1\_250001|ID:27163200| conserved exported protein of unknown function [Uncultured spirochete bib]

MHRFGLHCFTLKYRKTFLATFLFLLGMSAFAFTFMPMSISISPSGAQSIASFRLTNDGGQ  
QIAIVIKAMTRDIDENGNEINPADKDFTIFPTRVVVQPN SFQNIKVQYKGTPLAKEAA  
YRIIAEQVPIDFTQQQTSGVKVLFRYIAALYVTPTNV AHKLSVSKVEYAEQEGKKGFLVT  
ITNSGTRHALINDPVLKIAGGTGISITLKDDAVKAIQQQNLLAGNVRRFFVPSDDAKPNT  
TYTGTLSATIE\*

>SPBIB\_v1\_250002|ID:27163201| exported protein of unknown function [Uncultured spirochete bib]

VFFRKLMSVILLFFVMGISISFAQTPPSQAISNAPITHDTIVPDLEITIALSINGKPAG  
EVNAGIWQNQAVLYKKLAAQLLIEHLRPDIYSVIFDSVFRDLTWLTADDFALVGISFEFD  
SAQLTISITIPPEYAPVVDIDFVPEQVPNYKPI LRAAPFSGFIQNESALQISNVTSNTLN  
YSTQLLAMIDLMGTHLVGSGNISVSNAALSYSVDNAYALWSDFARKLQISLGKISIPVVG  
AQTQSTLYGISIGTSDFEKYIVRQGFIDDMTEFTIHKLARVSVEVNGKPIRTMMLAPGNY  
RILDLPFTSGLNEFVLRIEESDGNVQVLRRIIPRESNILQVGTSKFALSAGTGIQDWKEL  
FASGYWLFGISPAFSGGFNIQADIRSAMGGLTWVSALPIGTINGSASLVGRWDGWGEMFA  
PAASANYVFSMPGNSSIPSLGLSFSYRGKGFMP PATSAPDSAPPSLLSFSASLYSAIFS  
RTNASIGYSLNRILSSPTAMTHEIYASISQSFIKGGNLSLSGRLSFPSSGSPTFSAILTF  
SIMPRESYARSLNFMQTTDGTSLGILDKFSAFGQVDFDNINTSSFLPGSGESSVFNIGV  
RNTSEFYDVSAAGSFAHDSSLNTDTLTGNLQFR TTLAFVGS HVAFTRQIPDSFIL IATSP  
SLKKESALYRLSSGAQYFAAKGQNIILPLTSYTTT VLSVDLVESPINLNPRYPFVLVSPA  
FRSGILFQSDVVKRYMLYGRVLDVTTGKPV EYLPGLDIYDLGGSMVTSTFSDEM GHFEIYDI  
LPGTYTIEWPEGYGTTQFELSESGEDTIDLGDV VVHVRGK\*

>SPBIB\_v1\_250003|ID:27163202| exported protein of unknown function [Uncultured spirochete bib]

MSRKLLLLAVIYVGVMAAGSQTLSLNPITAPATV TYDPDSSSDTTGPQFSITVRLSKKP  
RYTFYFFVTINGSPTVNSRDLVLT DNSALSILSKFYKDS AFTQEILGGNGSGMTSTQVLY  
GQFNKNTSVLTQTFTVYPWIGKNQVPYGT YAGTFTARLYQGT VGVAGTLRDSNFYTA  
IVNQKVDVRIGPATGSYDTGSAIYNINLGEVSS GASGTF AIFLKANTAYTLKMSAASGGY  
LTSTTTSDKIQYMLTIDGASKTLGPDIIIDQ ETAKQLYSKVLLGAISVAAGQDVEAGQYS  
DTISFTISAN\*

>SPBIB\_v1\_250004|ID:27163203|malQ| 4-alpha-glucanotransferase [Uncultured spirochete bib]  
MQIPRSCGILLHPLSLGGPWPCGTMGEEARAFVDFCAHAGIGWWQVLPPLGPTAYGDSPYQ  
SPSAFAGNPLYLIDPKALMDEGLLAPEEVEGYLTGFNGAESSRASGVSTGSSTNYIDYAL  
LFRENARLIEAAWRRFGSREGGARLAKFQQFGNAQASWLDDYALFAAIKEHEGHRPWNEW  
PEAFRCREPDIAIRFVSEQAERIGRIKFTQYIFWTQWQKLRQYAHERCVRIGDIPIFAA  
YDSADVWAHPELFQLDAEGMPHVAHVPPDYFTATGQLWGNPLYDWTAAHAKTGYAWWKAR  
VQHTLSLVDVLRIDHFRGFEAYWAVPAGEPTAEHGRWEKGPGLHALFNALKEALGELPIIA  
EDLGFITTEVIELRDSLGFPGMRILQFASFESQTDNNDYPHNYPQHICIA YTGTHDNDTAMG  
WIEHAAPQARKRALAYLHGGRRTFSWDLIRAAWSSPAMLA VAPMQDFLGLGSEARMNYPG  
TTGGWWRWRLPEGALSPALARKIKRLSKIYFRI\*

>SPBIB\_v1\_250005|ID:27163204| protein of unknown function [Uncultured spirochete bib]  
LYSFSRSLVGKRTCPAIARGPLAQLAEQRPFKAWVPSSILGRLISNIFYKQLAAAFARA  
AYLFFGDMRIFYEKGSVRKAKKVKKRGQTP\*

>SPBIB\_v1\_250006|ID:27163205| exported protein of unknown function [Uncultured spirochete bib]  
VEYRVNRAVAIMALAMLSSFSLAAQTVVPGLPKDARSMGMGGSFKVFAEGYSSLWGNPA  
GLAARGSLTVADSATWAYVQPTPLNIKNIIRVLGQQATHDES VATLDGLINENDFGMGES  
LGFSGWTGNLGLGLTSIVDALVTGDALAGSKLAITSQTNAVLMGMAWPVNLGPFGRIGAS  
ARGFYRIETLPGGWPFDSLAEALNRQDLYSIIKVYNVQGGFGIAIDAGATFSIGPFSIG  
LMMRDYGDKFAMNESTIEDIANFSMVPSSGGIDTYVFKPVYTAGLALKLYQDFLFSFSFYV  
EADDPLALFPLVTRDIDAMFSRLHIGVDLKFLKFLRAGFNQGLFSFGAGLDLIILEVD  
AALFSEPIAAGGRIGRTGIALQGAIRF\*

>SPBIB\_v1\_250007|ID:27163206| protein of unknown function [Uncultured spirochete bib]  
LLTDQWYNSKVERIVILEQQAAGAMGQRLVVCFSMLFFAFVQLFHPIL\*

>SPBIB\_v1\_250008|ID:27163207| conserved exported protein of unknown function [Uncultured spirochete bib]  
MKRKAMIFILLIMAVLAATAQTTLQFTSPMPKDARSMGMGGAFRVFSEGYSSFFGNPAGF  
AGMSSLTLIDMSTWAYLAPTSNLGRVQSIISGSASNSDILSWAGDWLAKNNGLGAGASI  
GAGWVGAKGISLGVNLVTDELA YGNLLGAKLLSTTQANGVLGLAYPIHLGPVWFKIGVD  
GRVFYRVQSKPTTGWGFNTILDFLNDTFSASSL TLLGGYGFAADAGIILGLGPVMLGFT  
ARDFGMFEKVGDFTAQDVIDKQFSALPLSGTTAALTPSYTAGLIRLFENGMEFPEPVYA  
EVDNPISLVSSDILSDVLNSLHAGAQLRMLRFVTVRGGGLNKGWYSLGAGIDLAFVEIDA  
AIFTEELGLYAGDKGRSGISVQAAIRFGR\*

>SPBIB\_v1\_250009|ID:27163208| exported protein of unknown function [Uncultured spirochete bib]  
MRSKYVAYAALLAIIVLFFTGCDALITNVFKDANLGQPSAATIQNQDAATLIQQAGITSG  
AVSDTFIQTVISDETTKNQVLATLQGTVDGTGPAEAQAAQALILDIKLADIGADAVMDNL  
NAAVQGLATLANSNEQLNPQDIINALLPAELANNPANLASFIDNLAGLGTVDVDTLAQKID  
ANNGTVADGLDIATIAQTAALVKFVEIVEPASEYSTGEAIANAVEDLKNDSNADVTKYFA  
AQPDIASLADNTTLQTLFDAAGLSALLDKMKSGS\*

>SPBIB\_v1\_250010|ID:27163209|mtaB| Threonylcarbamoyladenosine tRNA methyltransferase MtaB [Uncultured spirochete bib]

MTLLRVAFQTLGCKLNQLETESVADRFLATGAKIVPFHEEADLYVVNTCTVTSKAEQKAR  
HDIRAALAKVPHAVVVATGCYAQMEPGALALGERVIVIPGDLKASLLALAEWLSNWQG  
HGELLHAVQEWQEEIQSAAGVAAAGTPLAAGTSLGALVGAQSAPVNASSVPGTSLGALPT  
DRFAFNPERFAMHSRPAKIQDGCNNRCAYCRVCLARGPSVSLPAQEALARVRKLEQAGK  
AEVVLTVGNLAQYRDSALGLDFSGLLAFLIQGTERINFRISSYEPERIDDAFLAVFANTR  
VRPHMHLVQSGCTETLRRMARPYS AERVRAVLDLRASRHPFLAADIAGFPGETDAE  
FEQTFSLSELDFAWIHAFPFSPRPGTRAADMKPRIPERIERIARLIALAHSGKQSYI  
ERWIGREVEMVVEHEGFGQDDAEQFDQALTRRNADTHRGLPKVGQPEADSSSVIAALS  
RIIGTTENYLKAEAVQKGSGRQSGIPAEAFKTRKALEALGLRPGDTRILIQNVLADNN  
AEVSAFFVDTWTS\*

>SPBIB\_v1\_250011|ID:27163210| putative TPR protein [Uncultured spirochete bib]  
MMHKRLKQAHILVFCVLLLLGGDIGYVFSQALPSSIAAPYGMTGSDLLRMSQEGKHNEVA  
LLAPEVLRKNPQDLDAYIAYAWSMNALKEYTKARDIAQGGYAKFNDARLAQALGEALYYL  
GENAAALS NFQEYLAKFPEGNKVASTYYLCGELFVRMGKFNHADI AFSTALQYNPSNARW  
WERLWVREKTSRYLAALKA YEQAISLNPSLQDAQSGRMRMLAKIKD\*

>SPBIB\_v1\_250012|ID:27163211| conserved protein of unknown function [Uncultured spirochete bib]  
MSEEEVKLSVVDEEEVDTVIGSEIEFDGEIESSQSLMIKGGKISGSIRCKTELYITEQAEV  
NATIHAATVVVRGKVRGDVSADSLIAVLDWGHVEGDLSAPDIYLSPCFFNGKTVFTS\*

>SPBIB\_v1\_250013|ID:27163212|rsmA| Ribosomal RNA small subunit methyltransferase A [Uncultured spirochete bib]  
MTINFDSPVSIRTFLEAQGLAVSKKFGQNFLVDRGMRRERIEALDVQPGMSVWEIGPGIG  
SMTEIILQKGADLTTFEIDYGFVRVLEEMFGSDSHFSIVKGDMLKTWRSVSRPDRIFGN  
LPYSAAFAIADLLEQDCVPTRMVFTLQKEAARRMAARPGTKDYSSLSVLCASVCDVRIL  
FDIGASAFWPQPRVTSSVLLVPKDPVAPEKRKDFSDFVRAAFSSRRKTLRNALHVWAH  
THIPSMNETEFESLLAACLAKIGARPDVRAEALPPRQLWDL YDLLASASNSASTGTGACT  
STSTNASGSPA\*

>SPBIB\_v1\_250014|ID:27163213| membrane protein of unknown function [Uncultured spirochete bib]  
MRVEPACIAAIGLWLGFLVGGSGLLDLVLA WVGAAFAIAMECWPRKTRGMPRTLMIAGAL  
CFGLAMSAGVRLRYQAQQGSMAQQISTMQKSTAQAALLEGGLHLEAIEGVLVGDVTQVTSK  
ENRRFDVSVQAAEFGAPGIKVRCEWKRAVFLKRPAPSLALITGAGERMLAGTTIRAERLK  
GGDFVWVDERDLKVSGLTPLLARLRAAIAARFASALFAVAGRAGPLTQALLLGVKDELDT  
EFKGLFQSAGCAHMLALSQHL SIICTLAALAAKRVLHREKLARRASFVFAWLFVWLAGP  
GPSLLRAVFMLTAAEVGRMLDRPQSSFALLSLASLMLALFDPSSITSLSSIYSFAAMAGL  
VLFAGRFDYALRPYMPARISQAFASCAAVCGTAPVSILVFGTFVPAGILAATIAAPVML  
VFMWLGLGAGLIGVFLPIVASVSAPLLGTLQDVLLAILSFGAWLPALQTGTGMVDRALFC  
AGIVSIWVLIYAVPMLQWKKSRMQMQRMLILPSISPWGGLSL\*

>SPBIB\_v1\_250015|ID:27163214| membrane protein of unknown function [Uncultured spirochete bib]  
MADLSLKRFSGYIIMLLAYITAWADILLAIPEPPAFSALWFISVLLKNVIRIAFVLYIAS  
QLTLFAKSKWKEALVQAPSRHDARQALVVMFISLGCAGVGVLVSWLSGIANPLFIAHNRL  
PLLVLFPILLSSLSVGYAEELFFRFFMIDGLMEAGAPVNAAA VVSILIFALSHHAQGF  
GIGFAAVLAAFYTSRFRKGFGLHSLALGHALYDGIILLIVLA\*

>SPBIB\_v1\_250016|ID:27163215| protein of unknown function [Uncultured spirochete bib]  
MKPEVRAINSLDLSALAGRAWTEKDLSLAIDKWLPMLPRSTREALTGLAVEKLKTDPA  
RMPLAIAATFAGVLLKEYDGTPLTAEWREL RDVISDCADELDMDNVTYAMSLIMDYGAL\*

>SPBIB\_v1\_250017|ID:27163216| Methyltransferase type 11 [Uncultured spirochete bib]  
VKRSVKKPVKKHEWFEDEGFWD AFAPFMFDETRWALADPEVEHILALTGIQPPAKVLDLC  
CGVGRHSLAFARRGFQVTGVDITASYLEAARESAEAEKLAIEFAQADARQFVRPGEFALC  
VNLGASFGYFSDAREDFGLLKRCREN LAPGGALVLETIGKETAARDFVEEEKIARDGWEA  
SARYSIIGEWKLG NFWKAQKGALVFERSFAIRLYSGTEL RALLRKAGFTHIEIYGDLDG  
RAYDQHATMLVAVAKLR\*

>SPBIB\_v1\_250018|ID:27163217| exported protein of unknown function [Uncultured spirochete bib]  
MKCFSAMLLAFVVCVAPFLAALDPESP GSSPGSSVLQVPQASETPEAPSQ LPPQMLPI  
LTEPADPSGFFFAAEQMRMQAGDAGLAPEQARLAEFMYTLAFRFAKGPAALEAGRSLFLL  
LSTQGRLEAASTAREWLQSFDPDWTMYRNL YDTLMAQGSFPDAFALVSELSKAMPSTAK  
SRSTELSWMEYNARFGMQDYSWAANGPPFIKTRTPDSYIAKIYRLYAAVPNV PQNQAALA  
LFRAAAATEKNYADAIA YARPILPTFSGSDTPRAWISELGKSFY GAGLYREGIDFFLAALG  
FALPAPSPAPSQSSLEAPLSAPVPERTPFMNSAPIIDRAHVSTELSWVMAFY LARMYQGL  
GENQTAASVFIDLVPFAFSS ESDSALWYWLDITMNAIAATDSTLGD LGQDDANGIQAKR  
SLELSALSQAAALWKSPSYFEDIVANYMRLLREGAWNDVVRLCVLMSQKLTASMKGPLL  
YLSGRLIETGRASADLSTESDFWKWLAPT NQNQSSPNAATNAVSQNPPDSGSNSQIPSAP  
SAPLALNTSPLFFQSLLRENGIEEHYRTLAAWRLGKEPILADTPVLDKNFDIVSAITSQ  
LPQSDTPPV SDEKLKEVDFITQSLDYGLEALAAKQVAVLSPFSTDSLLWLA AKFTEHEQ  
YYPALRIGSEALTRKPA AKPELAYALLYPRAWPEHFSELTAPRNIAEPLAYAI VRSESMF  
NQRAVSRSGAMGLS QLLPGTAAETARGLKMSQYALFDPKDNLTIGLTY YGYMLQRFDGRP  
ARAAIAYNAGPSRMAQWARDWGNLEDDILIELYPVAEPRQYTKNIIAALNYGKMY YGIS  
SKDMLDFMLAGKALPQPASVQPAQNAATSAPASAPTAQSLSEPA PAPAAPAPDTSQPTLA  
PAP\*

>SPBIB\_v1\_250019|ID:27163218|sua| Threonylcarbamoyl-AMP synthase [Uncultured spirochete bib]  
MEILSTSEADLAKAARALREGKLV AIPTETVYGLGANAYDERAVARVFEAKARPTFDPLI

VHIARIEDLNEVAREVPPSARALANALWPGPLTMILPKKPEIPDIVTAGLPTVAVRFPKH  
AIAQRIIALAGVPAAPSANPGFYISPTTAKHVIAMLRDKVDFIVDGGPCDVGVESTVID  
MTGTSPILRPGGMALESIEAIIGNVSIQAQPGRSPGTTNTLDTAGVPEKGLPSPGQTLS  
HYAPSTPLYLFDADSLPRSAKESEIPHSVALVFDSSIRAKELESYHIFEQVVALAPSGDM  
REAAARLFSLLHEFDARGYEAIFAERVPEAGLGRAINDRLYRASKK\*

>SPBIB\_v1\_250020|ID:27163219| B3/4 domain protein [Uncultured spirochete bib]

METKLIFAQDTGLKKLRLALIELEGLHWERAEEVAPPEALFEIILEQARASGTEARVSQPQ  
SPARDSRLTESRTRAVRDMLRNGSYKPAGRAKPSSEYLLAAALDGDGDFPRVNPFDVAVNLA  
SLKYLPMISFDADKAGGALVCRLGAAGESYVFNSGGQIIDLEDLLCVCAPAVESGIS  
RRAAAPEAGAGGIPIVNPVRDSMATKLFECANAIAYIYAPSGAEGADLEQAAADIAAWC  
GRACDRTAIRLF\*

>SPBIB\_v1\_250021|ID:27163220| protein of unknown function [Uncultured spirochete bib]

MNVAIVCEKVNGRAQMAGQARFYEKHKLGSTYGETPVCCYNIMPWKPN\*

>SPBIB\_v1\_250022|ID:27163221| protein of unknown function [Uncultured spirochete bib]

LKACGIVESVLAISSCHKLLIQYLKDFWTYETSPYVREKHLNGQCIGRRYVLESLHRGS  
SRTPKYESVCRCVHGPLL\*

>SPBIB\_v1\_250023|ID:27163222| exported protein of unknown function [Uncultured spirochete bib]

MRRLIAIRLAFFSLIAVIALPLCAQQYEALDRIALVIGNSNYEGTAKLKNPVNDAQDIG  
ATLSSLGFDAEVLTDADLYSMEDSVLRFDRDKLAKSPNSVGGFFYYAGHGVQSGGENYLIPV  
DARLNSESMLRTRAVPLQFVLDSLSEAHNKLNIIVLDACRDNPFWARSSARGLAVVGGQ  
PPASIVVYSTSAGRVAQDGTGRNGMFTTELLKHLPTPGLDITEVLRRTGEGVQAKTDGAQ  
IPAIYSQFFGFLRLAGEGEGGGLAQGSAAQSATYGSAQGGTQEALGDASLDYLPAFFDDA  
PRNTKLAIAKAEELTWDEKWLAWRLLEKTDPNDRDPYILAEKIRTALDGNSYTDNYRGF  
SFYDTPPDGDVVKARADGTIDEEYFDFDPHAAVQVLLDRGVEIPPVLALALGDFYYNVYN  
YYPYYPDDWSLTSDEILADGLRWFDLANENYIVVDTTSVIHYAELLMKAGRNTDAVAILS  
DQVEWEPDDRILRQTFVDALVRAVQIDEALGQLDMLIANTGSKEEALDYKQAAQIAFDN  
QKSAQLEHYLAALEKDYPPDDWFGPAMRHRLAVNTGDKLRAQKIAEDLLTHFPPSVSTDAL  
ESILTNWLLDPAGPSAGLSFLDSSILAAKKGKPRELGIFLYRALYRYFTVEKDPFAFKARD  
AAIQRSFEDIDSAEKYLQAGPEPDMLESIKHIREEWGKGGK\*

>SPBIB\_v1\_250024|ID:27163223| conserved protein of unknown function [Uncultured spirochete bib]

MIRRPWWEARIRALWERKPIVWLSGVERRAGKTVLCKSLEGVQYYDCELPSVRREMOPES  
FLRAANGKFLALDEIHLRDDPALLLKIAADHFPDVHIVATGSSTLGASAKFRDLAGRKA  
ELQLTPLCEADSNFPQYSDRTRRFLHGGLPGFFLSMDRDDRYSSEWMEAFWARDILELFR  
LERRSSFLKFAELLMASQSGRFNAASFAASCGVSRPTIMNYLAILEATHLVLVVRPYHGG  
AAKEIVATPCVYAFDTGFVAWAQGLHEIPAKEKGGFFWEHLVLNELDAILQGSPSIMHWRD  
KEGHEVDFVLAPRGAPPIAIEAKWSADAFEPEGMQAFRALHPGIVNLVVSANVDQPFERE  
MKGLAVTFCPLSALANLKTGSDPDF\*

>SPBIB\_v1\_250025|ID:27163224| conserved protein of unknown function [Uncultured spirochete bib]

MLGKSGSDPDLQIIFKFRGQTPKLLKNSKPRPAIAICKFNFQLAKAKHFYYHSYMIPRIA  
EHRIRSLCAQFPAAIITGPRQSGKTTAKALFPDRPYLNLELPDPTLERISHDPRGTYPL  
RRSGAVIDEAQRFPEISSWLQGIIDEEPKAGTWILTGSQDQGLRQSVSQTLVGRAAYARL  
FPFVSDLSGNPIFSSSSTDEIIQRGWYPPLFDRPFVPSDWYEQYVALYLERDLSRLINI  
KDLSQFRKFFSLCAGRTGQLNLSDLARDTGTSHHTARSWLSVLEQSFIVFELQPFYRNF  
QKRIKSPKLYFYDSGLAAWLGIREPGQVTNHPLRGNLFETMVIADIIKRSEAIGTGER  
FSFWNAPSSGEVDLVIERGTEISAIEVKSTATFRPELASGLEKWSRLASLPPERLAIAYD  
GNERFQFKGINIIPWRAFGQ\*

>SPBIB\_v1\_250026|ID:27163225| Putative oligopeptide transport ATP-binding protein YkfD (fragment) [Uncultured spirochete bib]

VVLDESPSALDVSIIHAQILLLLDSFSKEKNLTYFFITHDLGVVVKHFCDRILIMYLGNVCE  
LAPTKKLFHKPLHPYTTSLAAVLRPVVHKKSTQESILQGEVPSAVAPPPGCPFHTRCPK  
RMEICTQAKPELAEIEPEHFVACHLYSKAERAPSRENALARQ\*

>SPBIB\_v1\_250027|ID:27163226| ggt| Gamma-glutamyltransferase [Uncultured spirochete bib]

MNFDPTYLPYASARYPIYAQHGMVAASSPQASAAAGLEMLRRGGNAIDAAVAAATTLTVVE  
PTANGIGSDAFALVWIEKERRLYGLNASGWTPRDISIEKVLAAPGSATGGSEMTGGARGA

EARSTEASGAAQSGKMPTYGWWSTMVPGAPKAWAALVARFGALSLSEVMAPAIDYAENGY  
PASP NLARMWQRAFEKYRKT CVGPAFEEWYRTFAPEGRAPAAGETVRLPNHARTLRAIAE  
SSADAFYRGELADRIVADSREFGGFFCKEDFAEYEAGWVEPISVNYRGYDICEIPPNGQG  
IVALMALNILKEFEFTTRESPETFHLQWEAMKIAFADGLAHVTDPAAMRVAAADLIQPGY  
GSLRAREIEPPGGPARLYTAKTPPKSGTVYLCTADSEGNMVSYIQSNYMGFGSGVVVRGTG  
ISLQNRGADFSLDP AHPNCLAPRKKTYHTIIPGFILKDGRAFGPFGVMGGYMQPQGHVQT  
VTNLVDFHLNPQQALDAPRWQWILGKKFMVERAFP AEIAEALTRRGHEIEVSPDSTPFGR  
GQILRLPNGTLVGGTEGRTDSNIACY\*

>SPBIB\_v1\_250028|ID:27163227| Major facilitator superfamily MFS\_1 [Uncultured spirochete bib]  
MNDTIENKNLSFRFGLNYFLLLAIYGISSPYLQLMVRRLGYSPA AVGIFLGGFFELVGIT  
GPIFLAQKADRFGRLKPFLFASGIMAIAGLALLAPFRIPLVTLISLTFLSLGLKTPILL  
DTSLLRAIEKSAELGKKQPNYGLLRGIGSIGFVVVAIIVQSIPGFDASSAGTIAFAQGIL  
ILLFLAGL FALPEVGH TQPRNEKIAFSFKWLDSTFMLGLAVIALGRLAMASVGSFFSMYL  
TEELHWHAVGAMWALSATVEIPFIMLSWKFIQRKSPMLAVAIASGAI VVRLLIYAIFPTP  
AGAITGQLLHSLCYGLFQPA AIAFVN LKTPPAERATGM AIYMGLGIGLPSFLGSALGGTI  
VEALGYRWLFASYTLFAIASLVLFWRHREELTGVR\*

>SPBIB\_v1\_250029|ID:27163228| Cupin 2 conserved barrel domain protein [Uncultured spirochete bib]  
MLSIVTPMVRHESEIESVEVKGEGISGVRKQILVGPNDGWQGYMRVFALEVGGNTPAHRH  
PWWHVNYVLEGEGETVFIDGVGHVVKAGSVAHIEGGKLHQFVNTGAVPLKFI CLVPPEGDHY\*

>SPBIB\_v1\_250030|ID:27163229| putative enzyme [Uncultured spirochete bib]  
MNTVRWGVLSVSNHYRLRVHHLQLAGSELSKVVAIASRDTAKAETAACELGIRRSFGSYEA  
LLADPEIDAVYLP LPHLHA EWVKKAADAGKHVLC EKPFA MNAQAADAIRYAESKGVKV  
MEAFMYRFHPQWAHAKEVVQS GEIGK VLFVHVQFTFNK DPNRINRILEVGGGAIMDIGC  
YACSSSRFIMGKEPVRAISLVSRDPEFGTDALSSGMLDFGDARALFTVSTQAFPVQQVDI  
VGTSGSISIFIPNMYGDVPAEMRIVTGIGPRTVRLGPAGQYRLMFD AFSKSIIEGTPVP  
TPPEDAIANMRALDALFRSEKSGSWEKII\*

>SPBIB\_v1\_250031|ID:27163230| NUDIX hydrolase (modular protein) [Uncultured spirochete bib]  
MKKTKEQNELQPD DSTQVSSDA YIRSL EDKMNHALERLGGIGAAASAFHFCPS CGSPKLY  
SVRSRMWK CPTCGFEYFHN VATAAGIIIESRGAILMLRRHKDPMK GKFALPGGFVEPGER  
AEDAALRECYEEIGWSPAHINFLATFPNVYQYQGV PYATCDVYFFSRGNIVDFDDFELDP  
EETESLQFVNVT AIPWADIAFESA VRALRYFLLHESIGIPPQMPDFE\*

>SPBIB\_v1\_250032|ID:27163231|uvrC| UvrABC system protein C [Uncultured spirochete bib]  
MSMKTREGVPAVSTVGESKEVITRPVNPAAPVGRDPNAPEIPHPETDTERRARKTLVKQ  
APQNPGVYLMRDETGEIIVGKAKHLRNRLSSYFSGKKDIKTRHLVSRIHQIEWVLA AHE  
YEALLIENNF IKEHSPRYNINLKD GKTYPSIRITSEEFPRVFRTRRIINDGSEYFGPFPS  
AETIDTYLDLIKRMFPLRRCVKMKKRATPCMY YHIGRCPGPCAGKISRE DYLERVDEVK  
LLSGD TESLVKDLEREMRRAAGELRFE EAARLREAIKAIQSF IGHSNAVDFNNDARDYV  
AWEAEGEQVS YVVFQMR EGKLRNRDSFIEHLVSDELETLDAFLARYYEEGRTPPATIFVR  
RADSTDAIARYLSERFDSRIDVRVPDSE RHWAVMNLAVQNAKEELAKRRRMHGDF AALAE  
LKEALGLGSMPLRIEGFDIAQLGGKHTVASLV SFRNGIPDKKNYRYFKIRSVEGQID DFA  
AMREAVARRYTRLINEEAELPDLVLVDGGTGQVSAAKEILDDLGLDIDL AGLAKRDEEVW  
LPGRSKPVVLAKDSPALRVLVAVRDETHR FATGLSRKLRISDATFRVLQEVPGIGDVRAK  
SILREVG SLEAVAQAEPGYITSIAHVNEETARKVIDAARKTV DVARRTVDTEEEPETED\*

>SPBIB\_v1\_250033|ID:27163232|tktB| transketolase 2, thiamin-binding [Uncultured spirochete bib]  
MNIPALQSI ALSVRSLTIDAIQKANS GHPGMPMGAAELGAYLYGVELRYNPGDPKWLNRD  
RFVLSAGHGSMFLYSLLHMAGYDLSLDDIKAFRQV GSKCPGHPEYGVTPGVETTTGPLGQ  
GISTAVGMAIAERMMAAHFNKPGQEIIDHYTYVVAGDGCLMEGVASEACSLAGHLGLGKL  
IVYYDSNHISIDGSTNIAFTEDVGKRFEAYGWQVLKGS MYNFEELASLTAQAKADTSRPT  
LIMLESVIGK GAPS KQGTSGVHGSPLGEE EARKAKEALGIPLDKPFWVAPEAYAYFKAHR  
MALEGEYQSWQARFEAWRNANPD LAAELERWLEGKPAHELDLPAFKLGEKVATRNASGKC  
LAAVASAWPNLVGGSADLTSPNVTQLPANS DGMPLVFGKENPAGRYIHFGVREHAMAAIA  
NGIAVHGGLRPFVATFLVFADYLRPSLRLSALMRLPVIIYLTHDSIYIGEDGPTHQPVET  
LASLRAIPNLKVIRPADA EETA VAWRIAMERTDGPTALVLRQNL PVLEKADPDWPYTMV

LGAYVVQNPARSPEVTLVASGSEVSLATAAADIVRKQRPELAIRVVSVPDRQAFYAAPAP  
VREAVLAPGSLVFVAEAGVAQGWEHLAPPERILSIERFGESGPGDKVAEHLGFTAQAFAD  
MILAQFSNF\*

>SPBIB\_v1\_250034|ID:27163233| putative Histidine kinase [Uncultured spirochete bib]  
MSDENISGSSPFSHIRKLRPHERAMFAGIFFVLVIVLGA VGYFSWQSILRDKKLYTELAS  
RFKAEQIASWYNNHMEAAEISASSVIFDAVADAIADPGSPCLKRIENYLTPILRSFN YA  
DSAVMTPDRKILVSLTGFAQPDCDMIQKELAARNNSEPFMTSLHLVSPYAKPGLHIVIPL  
VDKKTQKPIAYVVHTVFSDDFLYPMLAQWPGNEHTGETLLLKRTDGMIVLNPLKLVRI  
AFSLQISASDPDTVEARAGRGETGFLSGKDYRGKRVLAVASRVPELDWTVL SKIDISEAF  
SGWFLTLVILILFGIIFVALVAGAYVLLSSRAISTYRARDLLQRTERNEALLNAILER  
IDSLVVIPGKNLAVQFSNQAYQARFGTEWPKDLPDPQQATPEGPKPEQARKIDIVDKNGN  
HARLLIFPIKIELRGQEPLLGYVMRDITELESALDVVQQLNQELS QKVQEQTQRIIDADE  
ELRAIAATISHDLAAPVRSIESFSELLYQEISERSSAEAMDYLMRIRRASASMASLTSDL  
ITFLSLDTVPLSLSEFDFSLAAQEITSDIIRNPGRRYQITIMPGLKMQCDRKL MNIALR  
NVIDNAFKYCSDN TITAEIGKIGQSGIFVKDNGIGMMPDEIKKIFTPFSERKDERYKPG  
FSVGLAVTKKIIERHGGRIEIESELGKGT TVYFKF\*

>SPBIB\_v1\_250035|ID:27163234| conserved membrane protein of unknown function [Uncultured spirochete bib]  
MKQSFLSVTILLILITDPLGNIPLFISLKHVPGARRPFVILRECAIAFLVLVGFLFFGH  
VFLGALGLSDQILRISGGVILFLIALNMIFPGTGGRLVEDEV DGEFFIVPVAIPLIAGPS  
AITYVMLLMKSDPSRSMEWVGAIFVAILVTMVSFFLSGKLKEWLGPRALSAIERLMGLVL  
TAIAMEMLLGGLAQYLG NLPR\*

>SPBIB\_v1\_250036|ID:27163235| conserved membrane protein of unknown function [Uncultured spirochete bib]  
MRRDIKGILAMVGT AIFWSLGGLFIKLLIDWHPVTIAGARSLIAALFILAVARKPKLNFSR  
NQVLA AVAYSITMLLFVYANKHTTSANAILLQYGAPVYVMLLSGIMLGERPLPEQIGALV  
AIVVGMGLFFADSLSLGHLVGDIAAVLAGITFAIHILFMRRQKEGSPLESLLLGHGMTAV  
IALAISVFLPAPVMSGKAIAAIFGLGIVQIGFAALLFSYAIKRISAIQSSLIAIVEPALN  
PVWVFLAIGEKPMGRAILGGTIILAAVVMSSVVSISEASRNGRAANAEGSA\*

>SPBIB\_v1\_250037|ID:27163236| fused putative transporter subunits of ABC superfamily: ATP-binding  
components [Uncultured spirochete bib]  
MAGDERNLSIRGDLAVWNGTNCIENAQRERGRHGM SIAQSKGSVRTQTLKNQCLPLYLKL  
GRSVRPLTQTSIFRYSVRMPTTDDK KIIYSMYRLSRRYGTQVLKDISLSYFYGAKIGVI  
GLNGSGKSTLLRIMAGLDTEYSGEVACAPGYTIGYLPQEPHLEPGKTVRDIVAEGVQEIM  
DLHAEFERVNEAFGDPDADF DALAVKQAEIQEKIDALDAWDIDAKLEFSMDVLRCPDPDQ  
VVDTLSSGERRRVALCRLLLK KPDILLDEPTNHLDAETVAWLEQFLRSYPGTVIAVTHD  
RYFLENVAGWILELDRGEGIPWKGNYSSWLEQKRQRLEEEEEKGSSMRARTLDRELEWIAM  
SPKGRHAKSKARIERYERLLNQDTKEKIRDVRLVIPPGPRLGDIVIEAKGLAKAFGDTV L  
FEGLDFTVSPGAIVGIIPNGAGKTTLLNMIVGKEKPDAGTLRLGETVRLAYADQMRARL  
DPEKTVWETLSEGLDIKLGRIE VPSRAYCAWFNFSGADQQK KVGILSGGERNRLNLAL  
MIKEGANVILLDEPTNDLDVNTLRAL EALDDFAGAAMVVSHDRWFLDRVCTHILAFEGD  
SQAIWFDGNWSEFAEWRRAQLGIEADRPHRLVYRKLER\*

>SPBIB\_v1\_250038|ID:27163237| Methylated-DNA--protein-cysteine methyltransferase-related protein [Uncultured  
spirochete bib]  
MATALTLRILDAIRAVPYGKVASYGQIALVAGHPRGAGGARDVVRILASMSEKQNL PWWR  
IVRKDGSIASPGSGAELQRALLAQEKVEFTKDKKATPGAFWNGQPAK\*

>SPBIB\_v1\_250039|ID:27163238| nagB| glucosamine-6-phosphate deaminase [Uncultured spirochete bib]  
MRVIIQNSYELVARWAA YHVMQRINEHPANAPFVLGLPTGSTPLGMYHELIRLCSE GKVS  
FQNVITFNMDEYVGLPAADPRS YHHFMWENFFSHIDIRKENVHILDGMAPDLDEECRRYE  
EAIQHAGGIDLFGVGGVADGHIAFNPEGSSLSRTRIKTLTRDTKLANARFFDGNPDRVP  
SYALTVGVGTIMDAREVMILVSGIEKARALHNAVEMGVNHMWTL SCLQLHPKAILV CDDD  
ATSEMRVGT VRYFKEIEGPHLVNWA\*

>SPBIB\_v1\_250040|ID:27163239| N-acetylglucosamine-6-phosphate deacetylase [Uncultured spirochete bib]  
MRKTVHSAFCIH NATVIAGYARMDRS AVLVEDNAIADIFSERRFAQKTFPPEVELIDAQG  
AYLTPGFIDTHIHGIGGYGTEDLSADSILEMSRILPAWGVTSFTPTIYPMPEEDMIMAIR  
AVVSAMGREPGA EIVGVHLEGPFISPAQLGVQRVEFVRPVDLGLMQRLWDASEGNIVSMT

VAPELKGMRELALFCIRLGIVLQAGHTDASYENMIEGMQAGIRHSTHMFNAMSRLHHRNP  
NAVGAFLIQPDLSCIEIADGLHVHPDLIRLLFRDKPEGNIVLVTDSLKPTKQASDTPMFA  
NDEEVYLANNFLFYRASDGVIAGSSLTMVEGVRNLISFGVPLESAVKMASANPARIFGLHA  
RGMISPGYRADIVLADSEFDVQMTIIGGEIKYSCAAGGTTGGAAAGA\*

>SPBIB\_v1\_250041|ID:27163240| exported protein of unknown function [Uncultured spirochete bib]  
MKRFAVVALAFIAAIALLGAQEPQTPASFYAEATQDTQEVINASRLQSKGQWSKAWNLL  
AAFDADNKNNGYVLAEKIRLALEGNVANGMLISFGFVDLAEGQNLDELTRANPPEKQNMADF  
NPLDLAGALEKSGEAVPPVLSYEMGNLYQVYKDFGDNWIQDSQTIQQA AVENYDRALAY  
ETYTDRSLSNQAELLINLQQYDGAEKVLRKAIAAYPEELNFQVNLASTLNDLGRFDEVYP  
IVDAIIAKPDTGDATYNAYVEGIKAGLNSGDEAKTDAYVEAMIARFPDEYVPMLIQHLLIA  
VRMGNEKANAADA VTAKFVDPNVVRSLLSTWLNAQDPAAGFAYLNRAYEKEYASEDKA  
AGTLIFYRALMYAQTAATADDLKLALADLQEANTRFSTVYEPDNPIFQTINQLNDEWKQA  
LEQPAPAEAGTAPEAAPADQSQQPAQTPEVAPGAQDEPAGASSSDATSGATE\*

>SPBIB\_v1\_250042|ID:27163241| protein of unknown function [Uncultured spirochete bib]  
MLLIRHNQAFWDTTVGQQILTDLIYRKISDAQRTFIDSASQHGIELACPSGCGKCCHGF  
MPDVLPIEADYIAYYLLSNSKVFSAAEAPSLQIASSAENSPPCPFHDPDRPGENCRIYPA  
RPLVCRFLFGYSAIKDKNNRSLYRLCRYMPAPQGLDARILDQDTIISKV GALPPLMTDFAM  
EVLSDLPSQAAERKPLIEAIRPALARIGTTLQYCPEPNA\*

>SPBIB\_v1\_250043|ID:27163242| Deoxynucleoside kinase [Uncultured spirochete bib]  
MSRKYVVVAGNIGAGKSTLVNLLAEHLGFIA YFEPVSENPFKDFYADMPRWAFQSQLFF  
LANRADMHRRLSADPHSVVQDRSLYEDAQVFAKNLYQQGIMGEREWRVYQNL YETLAEIL  
PHPSLVIIYIRASVPTLQARIARRGRDFEAAIPDSYLEGLNRLYEEWISSFTLAPILTIPG  
DSLDFVAESRDLQVILRTVRKRLLEDNQPYLFPFEM\*

>SPBIB\_v1\_250044|ID:27163243| conserved protein of unknown function [Uncultured spirochete bib]  
MDTIVTGLFNDGYVPIMDGVTVTVRNYALWLRKKGPTVYVITPFVVPNYKDTDPFPVIRFL  
SIPTIVRPPYRIGLPDLDIRLQFILKNRDFDIVHAHSPFAAGNLALRVAREKHIPVIATF  
HSKYRDDLMRAIAFKPIVDEQMKRIVDFFYSDHVWVPQESVALTLREYGYKGPYDVVEN  
GIDFEPADITQCWARGAEYKLPEEYSVGLYVYGQHILEKNLEFLVRS LPAVMDALPNFR  
MVVVGKGYAKETLVDLARQLGISDRVIFHDVIYDRELLKDIYARADIFLPSLYDTSGLV  
VREAAAMKTPSVLIRGSDAAEFIRDQENGFLCSEDKVDFFAQTVVRALS DKDSLKKVADQA  
QKTLCRTWENIAEEVAQRYSSILERWAR\*

>SPBIB\_v1\_250045|ID:27163244| conserved exported protein of unknown function [Uncultured spirochete bib]  
MAKLALS LAVVCALSTAPGFAQSWPEGKDSDRFDAGQGALEIAFLGHGSLVLLYKGSYIY  
VDPVSQYANFSKYPKADLILVTHEHGDHLDAGAIAVLSKNGTRIILPEASRQKLGKGEAL  
GHNHTVEAAGARVMAVPAYNVTPNRTGYHPKDRKDNNGYVITAGSLRIYIAGDTEPIPEMA  
NLDPIDITFLPMNQPYTMTPEQAAASARVIKPKILYPYHFGSTDTAALQKLLAANPEIEV  
RIRNLQ\*

>SPBIB\_v1\_250046|ID:27163245|mntH| manganese/divalent cation transporter [Uncultured spirochete bib]  
MALTDRKTQAGAHPGTHDEANPASSHPNGHKSDAKLIK SATDVLEGKSKKGF FARILPF  
MGPAFIASVA YVDPGNFATNISGGAQFGYLLLWVIVASNL MAMLIQALS AKLGIATGKNL  
AEQCRMRYPRWFVVALWLLMELVAMATDLAEFLGAAVGFNLLFGIPLWAAAILTGITAFI  
ILALERYGFRSLEAVITGFVS VIAISYVIEIFLGKPDWGQVAHHA FVPEFKGPSSILLAA  
GILGATVMPHAIYLHSSLMQNRVVVREPALLKCLFRYEIIDVVVAMGVASLVNGAMLIMS  
ASTFHAQGLTEVGSLEEAYRTLEPLLGKAASWVFAISLLFSGLSASVGTMAGQIIMQGF  
MNFEIPVWLRRIITMVPSIVIIALGVDPTKALVISQVLLSFGLPF AIPLISFTSNEKLM  
GVLVNRKTTKALAI FVTGVILLN VYLLYVTFAGG\*

>SPBIB\_v1\_250047|ID:27163246| putative UspA domain-containing protein [Uncultured spirochete bib]  
VYKNIMVPLDGSSTAETALPMAMYLAQAFEADITLFHAI EKNPPEQI HGERHLEHAE EAR  
RYLEEIARRFQGYAFKGRILSHVHLEESADVATSIADHMT ELGPDLVVMC SHGRSNFTQ  
VLIGSLATRVI GLGSAPVLLLKSDA AERSATKSGAPGIAHV VVALDN ASIHDKAIDY GKE  
ISEAVHARLVLLSVPTFSSLKGDGGWGLMSPATSSAILDIEEQK LREHLSAHQKSLAE  
AGIACSISVLRGDP AHEITGVAKKLDQPLIVL GTHGRSGMKAFWKG SVA AKIVSLSSAPI  
LLVPLHE\*

>SPBIB\_v1\_250048|ID:27163247|tpx| lipid hydroperoxide peroxidase [Uncultured spirochete bib]

MATITFKGNPVQTSGLTPAKGTKAPDFRLTGSDLKDVGLADFAGLVKILNIVPSLDTGVC  
AASARAFNKAAASLGNVILTISRDLPFAQKRFCEAEGIDKVVTLSELRDREFGKTYGVE  
MITGPLAGLLSRAVVVLNKDNTVVYTTQQVPEIAQEPDYESALLAAKKAL\*

>SPBIB\_v1\_250049|ID:27163248| protein of unknown function [Uncultured spirochete bib]  
MIQPMELQYVVRGYDCGYGGPLKPFALANFFQEAAGAHALALGIGMEDMWAKGLTWMLAR  
IDIRIERLPPEGQTVVVRTWPVGTKRLFAQRCIELVDSSGVKCAGAMYEYIVVDIKTRRA  
VRPERTLPIDLRTDIPWFPDLEPGIDGAFAALAQALQSANFGQHEEADIPSADFIAAQ  
GFMPAFSIEARARHIDHNGHVNNAHFINWLCDAVPMPPGAHLSRIKIDFVHEILKGEHVH  
AWAKANDLATFESSLSSAPDGSLHNPAPQSENTHAQTWLTALSVGKELVARGMLSITTAE

\*

>SPBIB\_v1\_250050|ID:27163249| putative glutamine-fructose-6-phosphate transaminase [isomerizing] (Glucosamine--fructose-6-phosphate aminotransferase) [Uncultured spirochete bib]

MCGIVSLVYKDENPSMGKEAEALLKRLEYRGYDSTGASFIGKDKRITLRKQVGAPSKVCP  
LLNIPSFSGQRFQVWRWATYGAVTDVNSQPHHVRCVELVGAHNGNISNTDTLKAWLTA  
RGHAVVSDNDGEIIVHLIEEQYAAAQSLASSELHLRKYANAGIIEGVPDGVLRMIEAI  
RKAESLAEGSYAAAVADPQLPGVFAIKSGSSLYAGMGSDSHGDFIVLSSDLTSVLSKTRA  
LIPLSEGEIWFDTKQYLIFSLQGQPFSSHPRLKRSLSIKDTQLSPEYQHIMEQEISS  
PNNINQVLRYYFRDPSIEPLAELFEERKDDCKETADKIASLSERFGSEALISGMREVFDS  
SAWNEVEARVQNAGAAHFVGLDFISDEAELLKELALDPLSRDRLLLMDKVIVWRKRRAV  
LRYTGELKNAIHEASHSGGRIYLVASGTSYHAALTAFFFNEMAHIPVYPCNPGIFRSMY  
FNCLSSNDLIIGISQSGETKDLVDIFQDVKKASPSVRLVSIVNNENSRIPOELSDFYLLP  
LCGPEIAVAATKSFTSQIAILYLIAASFMSPEQRIRDNLLKAKDLMTETIETRMGDIETV  
AAHLFAAPSIHILGTGLIGLAREGALKIREVVLNHTEGYDAAEFKHGPNTILGRNTILSL  
ADIEKLVGTEPIRGIGNELFEKLTNNYPLVFICPPEERDRRITISQIHTHKIRGADIVLI  
AEPQQELALAVEGKPMGAESYWSKYIPLPPSGDPCLFVFSATIVLQYLA YRMSVRKMEWL  
DSLGIQNHGVHPDAPKNVSKSITVD\*

>SPBIB\_v1\_250051|ID:27163250| UTP--glucose-1-phosphate uridylyltransferase (modular protein) [Uncultured spirochete bib]

MGRIIKALRYTASGFVVKVRGWIEGQSAAAGAASGAARPGLVRLGIARNVRIAGARPGFR  
FFSTKLHETPPQVHSGRPELQRAAPPVTIIMKGIIVAAGYGTRFLPVTKTIPKEMLP  
VTPSIA YIAKEFVDSGITDIIVISSRRKKALEDYFDREIELEELFMREGREDRLEKIRPF  
PARISFVRQAEMKGTGHALMQVSHLLGGEPICIVAYPDDIVIGTVPLARQLMSVYEQTGKC  
VLATYEPGDVSRYGVIDPAPDGVSVRGFVEKPAAGSEPSHEVSIQRFLYTPEFFGWLAQ  
GWEHHGSGEYHYVYALNKMIEKGVAYARVDGTRLDTGELGGFFEAQLYNAMQEPALKLV  
LARFVAEHGAELGLGGSRPDRK\*

>SPBIB\_v1\_250052|ID:27163251| Major facilitator superfamily MFS\_1 [Uncultured spirochete bib]

MRPIRKFLNVYSGLPSSLYVLF AATVINSVGMFVFPFLTLYLTGRVGMTQQEAGFFMIV  
NFA YIPANFIGGKIADTFGRKMLMVA AQVLSGLCYPCGFAGIGGNVRWFLLASVFFDGL  
TDPARSAMMTDLTTPETRRRAFSLTYLGHNLGFAVGMMIAGFLFEKSTSWLFWGNAIAIL  
AAVSLVALKVPETKPSREQVEASFGSGATDEAHRGNIIQALLSRPYLVMFTILTGLYGFV  
YAQHRFALPLQTKEFFGARGSVIYGTLMTLNATMVIVLSTPIMALTQRWKPINAVALAGI  
LFALGFGLIGLAPSULLMYLTTAIWTLGEIVNATNEGTYVANHTPISHRGRFQAVLPLIG  
GLGWSVSPVVGWFTDRFGLKTA WPYLGIAALACIGIWYLGIIENRPGRKLGKARAM\*

>SPBIB\_v1\_250053|ID:27163252| Phosphatidate cytidylyltransferase [Uncultured spirochete bib]

VRIDHVVTRADRIDHEQNRIHFQSPAEEIKIELTRKSLHLLIICIPLLDISPAVPIVA  
LLIGMLVYSTSEWLRHRGIIVPIIAPITEHAARRRDGNRFVIGPITLALGALLAIIIFDP  
LQAKVAILALAIGDSFSSLIGKSFGRIPMPLSGGKSFEGSVFCFLTVLVA VVFTGKFI  
ALIIAAATASVEFWPTKDWDNLIPLAAGIIASIVL\*

>SPBIB\_v1\_250054|ID:27163253| membrane protein of unknown function [Uncultured spirochete bib]

VTRNFRFTYWFISIVSLALAGSILLAIRTGTDKRLPFFLADARLYTEYFFFGAPVGIQ  
LAAALQICFLLCSSAVLIIVLFTFQKTVSAEVYLIALWAFVDAEALRLVMLIISQRST  
SIGPLVSLTRVVYGARFTGLISLFISGLYAVGIGHERPQTGYLLAILFGAMIAMLIPISI  
DRFQSSFMLAAGYRDITMIVTISLIVINFIDYVVAARLKEDSSYVFAGIGLTIAGSWVW  
LWNRPLMGGIGIALFAAGLFGVIKRLHKIYIWK\*



>SPBIB\_v1\_250055|ID:27163254|proS| Proline--tRNA ligase [Uncultured spirochete bib]  
MAEKITPREVDYSQWYIDIILNAKLADYSPVKGSMVIRPRGYAIWEKIRDEFDRRFKETG  
HENAYFPLLIPMSFLEKEAEHVDGFAPELAVVTHGGGEKLEOPYCIRPTSETIIWAMYRN  
WIQSWRDLPLLINQWANVVRWEKRTLFLRTSEFLWQEGHTAHETEKEAREETLRMLEVY  
RDVVERYLAVPVVPLKSESEKFAGAVDTYSIEAMMQDKKALQAGTSHFLGQNFQAFADV  
KFQSRQGELEYVWATSWGVSTRLVGAVIMTHSDDKGLVLPPTLSPEDAVIPIYRNDTKA  
AVTAFAEKLQAELRAAGFKIVLDIDDSSSPGWKFAEWEMRGTVPRIEIGPRDMQAGQVVM  
VRRDTGEKLFVPVGEAGARLRELQTQIQASLYERAKAFHDANTVPVSTLGELIEFFGVET  
AGTSGAKGGFAEALWCGSAECEASLKEKTKATLRCIPLGKQDHIEGKCAICGAPAKHRAI  
FARNY\*

>SPBIB\_v1\_250056|ID:27163255| protein of unknown function [Uncultured spirochete bib]  
MSSAEKKEIYLDALKDAAMSSAPSPDFADVRYKAEQRPRKVRRIAFSAAITAVAAAAS  
FWIGIAWNSQTSRDIALIDSWTVSAAAPVAVSVSTTQGAQNEIVLTAYQTSPVNLVQDLW  
ESSAGTGL\*

>SPBIB\_v1\_250057|ID:27163256| putative RNA polymerase sigma-H factor [Uncultured spirochete bib]  
MNSNELLVRAMSAEKKEFGRLKPDDSAATAQVSLPAGDDPVDLSLAEHAAKGDKGAFERL  
MWRWWDRIIRGYCATFVAFDPELAEAAQESLIRIYKALPRWRKESLGGYLYGICRTASL  
DVIRSRARHSARMSVEDFDSLSESPHSTGEANVLQEEANQMLAKAMQRLDPEDRSMLY  
LHEVEGKGLAELGAMYNLPVGTVKSRLFRVRDKLSVMLKEMGYELR\*

>SPBIB\_v1\_250058|ID:27163257| exported protein of unknown function [Uncultured spirochete bib]  
MKSNAKLLVMLFLIAAVALVSAQGGPGMGMQGVMPGSAVREWFKSLNLTNDDLKLEKT  
LAARELELVKAQNEIKILQTKVANMLLEPNPDMAQIEDAVAKSLEWEKTVRMIQIERQVE  
IRKILGEQRWQSVLLLVREARMSEKAGKFANSFSAKGLSPDEADRYTRLLKVLRRIM\*

>SPBIB\_v1\_250059|ID:27163258| exported protein of unknown function [Uncultured spirochete bib]  
MRTSRKAIVFLMVGAMLVAVTAGAFQAQGFGRMGPGVAVPGYGFNRATPVAPSYGYGARG  
WATVPGTAVPRTWNNKSFNPSLGFMGMMGSSGYGALHYFYQKLSTEDKAKVDKLVQ  
DTAEQILPLQNELRSLKLALNGYVWDTNPDKAKIDETIAKIADLQKKIQELRTNSILEIN  
KIFQTAQ\*

>SPBIB\_v1\_250060|ID:27163259| protein of unknown function [Uncultured spirochete bib]  
LKKHRLGLLAGMKARMKAQQVLSVPKTVLRACLKGIKAVELKKEKLRDRSMHLRKNRSL  
LPARTRAATAKLGVALAQTADSFVLVALMK\*

>SPBIB\_v1\_250061|ID:27163260| protein of unknown function [Uncultured spirochete bib]  
MTDSAARAVYCGYENGGMEKVTAKRIWHKKTMTISTSFACIAMAVLMLSAPSLFAQE  
VEAWFKKPANAALYSQVREDVIAMASQMQUALGLSDSILASRLEEGARKKVSPNILQASLQ  
GDLQRAIAAALILKENGLFSPDKKATAAVEQILILMRAGTSEDEFRLSKAAIAKSGKR  
ESALSRAISALSVVAEAQATYQLNGTDRERLALALIASDMNEKRFDLSILASMNFAQAGY  
RGSEALTKALEKASLGASGGHESADEGATGSVPGTQNGSQGMPQGNQGGGAQEGKTQGSQ  
HAPTEKPQPPASTNQGSHGKTGGSPGSNSR\*

>SPBIB\_v1\_250062|ID:27163261| protein of unknown function [Uncultured spirochete bib]  
MMNCTTTHAFVDSWEKGVPEGSVAEFKVHLEQCQEQCAQQFSILLPLIERDTAALQGQY  
TAGMRITSGQDQFVDNVMAAIAATRNPSIEPAHRAPVRRALTRQARVLRFPALAAAAAAI  
FIVGLGLGLFFGTRNGWTVTVRFVLNAPDAQSVQLAGDFTSWSPEGYALKKIGAEGTWEI  
TVPLKKGHIYVYNFVINGTTWIADPKVPAMVDDGFGGSSLLRL\*

>SPBIB\_v1\_250063|ID:27163262| putative RNA polymerase [Uncultured spirochete bib]  
MEKEAASSVQSTMSKAKANQGSFDEKVVVEEILAGNSNAYRRIVETYSARVLAFCRSRMR  
SEEDARDAAQEVFIRAYASLASFRSNENFASWLFIAAANNVRTHFRLFSSRKHKKEEFAK  
EIAVAPIPDPAEEAEQNLRAEALRQAVASLPLDLRKPVELYYFAELSVEETASVLKLGQE  
AVKSRLFRARKALRQAIEKNKAPSHPFAPAEPEAAHQRADHVQPKQSS\*

>SPBIB\_v1\_250064|ID:27163263| exported protein of unknown function [Uncultured spirochete bib]  
MIPKQKLLVFVLVLA VGFGLYSAAAQTAETTPATTTDSTDLQDEIAAVDEAAQIDNTAL  
LTKLSAQFQVDLAVLQDLNAQGYTTGQIWLALALEISLQSGKPLADAVAQAASMNTSGHGWG  
VLAQALGIDPGSQEFFALKEKLQIRTRTMASEVAAEHGNRVMTQQQTQNRQAQTGADQDNA  
HGAGSGKSGANGAGGAIGAGGAGGAAAGHGSANGAGASGNDPKR\*

>SPBIB\_v1\_250065|ID:27163264| protein of unknown function [Uncultured spirochete bib]

MRGLVEDSVRTGDGNFLIDTGNLNLATLSEYLRLNIFERWCVSRTSLPFS\*

>SPBIB\_v1\_250066|ID:27163265| Peptidase M16 inactive domain protein [Uncultured spirochete bib]  
MSFILQKETA VPELDSILRLYRHEQTGARLLSVINKDENKVFGITFRTPRRSDGVAHIL  
EHSVLCGSRKYPVKEPFVELMKGSLNTFLNAMTYPKTCYPVASTNLKDFYNLVDVYLDA  
VFYPNLTEYTFLQEGWHYEVDPQTKEFSYKGVVFNEMKGA YSDPEDMHDDLCCRSLYPDT  
SYGLDSGGDPLEIPTLSYQEFLDFHKKYYHPSNSFIFYGDDDPERRLALMEEWLAPFGL  
ASIDSLPQAQMRFDPEPRYIEYMYQAGEQDQPKAYAAVNWALRGHGNVLHAMQASILFHIL  
TGTSASPLRKALIESGLGEDLAGFGYSEELLQTAFSVGLKGVPTNVREVEKLIFSTLEA  
LAREGIEKDAIEASLNTIEFALREKNTGRYPRGLAVMLEALNEWLYNQDPIEALAFAGPL  
EKTKKAYADNPRLFSELIDELLVGNTHRTTVVLLPSPDANKAREEA EKAMLDKARMAFSD  
AELAQIMRATDELRRQLQDTPDSPEALATIPVLSLEDIPKEAPVLPSELLLLTETPQEGGT  
VAQGGQSAMDARRSETASSAFYHELATGGIVYLDLGFSAKLESRLPYVSLGRLLLEM  
GTDKESYVQLIQRIGINTGGIRSTSVSASRWDSREPSWFLLRAKALPEKAESLADILID  
ILTGARFDNPERLRQIVLEEKAAQAEAMLVPAATRMVSLRLRSRFPADWASERLYGIEHL  
FFLRSLAQKIESDWPSVLADIEDVRRAILVRDNLIVNVTDRATLNSCIPALRRIVKALS  
PERAHVTSGTRSARNSWIHEAISACDPASVSKPAAETLELPAQVNSVGMILPLWNSKAPA  
GAWLVVTKFLDTTYLWEQVRVIGGAYGGYSNLDLASGLLLLLSYRDPNIERTLDVYRNVA  
AFLKTCSPPEEIQKSIIGTIGDIDAYQLPDAKGFNALMNTLTGYTQEARQQIRDSILAA  
SPDDFRHLGALIEEALGTSMTGVLGAPDRIEQALHALPAPLERLSMY\*

>SPBIB\_v1\_250067|ID:27163266| Peptidase M16 domain protein [Uncultured spirochete bib]  
MKFAICERYRRLSRLFAAVMFVFLIVASAGAQT SFIRENAPT FTKTVLSNGIPVYMKVQD  
ANRVFHVSLVLQGGSLVTPPEQAGWENIALKT MARSSQNYPYEKAAAILDRTSSSIGTAV  
QFEYSTFSLTTLDKYRDELLALWGDMLTAPSFSA DDFGKAKDEVLSLSLQSVEQNPWSTTQ  
KVMNQAYFKGHPYAVNPEGTEESISPMATDARKWYAEHFSADRIFVAVGDFNPAELAK  
KLEALLGQVSGPKLGAVSRPSPFPMGPGSLIMQEHEQAKGTL YLRGDFAAPAPGSDDYF  
AMALAARMFSDLLFSVVRDKYGA VYTPSAMIRSFLANYGSIMYKTSAPDKIKQYIDEAA  
GLLARGRVVSVDPKTEADGYMPIGEAIDTYKQLYMNEYFEAVRSNAAIASLIIRSVLRT  
GDPADWLKDQKRIDMLDADAVQRAFNTYVLGG AFLWVAVGDQTLDDKLDPRAFEAIRF\*

>SPBIB\_v1\_250068|ID:27163267| Peptidase M16 domain protein [Uncultured spirochete bib]  
MNLKKKAGRQVLALVMALISVLAIPGQQLPQS QIGGAELSAAPGLIQNAKLENGLELFFV  
VENHSVPLVTVCVAFRGGALAQTPQTAGL FHLYEHHMFNGNDKYPTKDAFTAALNRMGTT  
NWNATGKEYINYITVPSDKLADAVDFWAH AVMNPTLNYAVLENEKQVVLNEIRGYHSD  
PAQIASNALESRMFPQFPWRKNIDGPESNVAQATVADLRDMQHAYYVPTNMALMVGDDTT  
IDQVRALAEASFQKWTWAPPEVLGEP PQGPIQGIRLVTS EDQFYRGIAQVQFRWRGPDV  
TRQTFD TYVSDVLLFLLSSPSGPFKSAIMRKVFGLYDAEYIDFTYPTARDGGNYIFSTYM  
LVQKPAAEPEVLQRVENLRQIVLSEFEQIAKDPKAYFGEGALEEAKTKLVDQNIYALESA  
GSFVTDTLTFWWSTAGTDYFFDYEANCRKVTWEDISSLRKYLIGEAGAASGTADSSPAA  
SARPPAATLVRLRSSTFSADPRMDSKITELGYTRVTADNAFWWQK\*

>SPBIB\_v1\_250069|ID:27163268| Phosphoribosyltransferase [Uncultured spirochete bib]  
MNKHHYTYQEIHRLAQSIASRVNESGFNP DVIVAIGSGGFIPARILRTYLSKPILAVGVV  
YYDMNDKPM EYPRKVQWIEEAEKQLAGKRILLVDEVD DSRVTLEYCTRELLAYHPAALAV  
AVLHDKRKEKRGQFPFVQVFGQTLDDVWIVYPWDAIDIDEHDRNARARPKEGL\*

>SPBIB\_v1\_250070|ID:27163269|fur| Fe<sup>2+</sup>/Zn<sup>2+</sup> uptake regulation proteins [Uncultured spirochete bib]  
MNELVKFEQYLRTHGQKMTRPRRIILKAFIETEGH LTTEDILREAKKVDPGIGQATVFRT  
IRLIADAGLAREALQDDGARKFEHLADHPHHDHLL CVGCGKIIIEFLSPAIEKEQQKIFSQ  
YAFPRGHMMELLGLCPECQAKQKKGE\*

>SPBIB\_v1\_250071|ID:27163270| protein of unknown function [Uncultured spirochete bib]  
MLLAELGPGQKFKVLRVTFGG EIGKRLADLGFISGAEGHV VRAALFHGPMQIRLADYDLI  
MRRHEAKLVEIELLQPVPVSEPAEHAVIDIRPNATGM RPKGMRHLNRGFHHGRPGCP  
\*

>SPBIB\_v1\_250072|ID:27163271|feoB| Ferrous iron transport protein B [Uncultured spirochete bib]  
MQEKRALTIAGNPNSGKTSIFNAITGAH HKVGNYPGVTV EKREGTLEYHGWRIHVVDL  
PGTYSLTAYSLEDEVVARDFVLNEKPDIIVDVLDSSNLERNLYLLLQLIELGLPVVAALNM  
ADEAAAKGILIDDKTL SRTLGVPMIPTIGSRGQGVTELLDAVIETFETHKMPRMP SYGED

IEAHIAALVHLLLEQDEAFAAAYSPRWIAIKLIEKDPDARRRIEQHVRAAEIHTALEAAWH  
WITLHYGKDAEILSEQRYGYIHGAVAEAVHRKRLRGISLTELDRFVMHPLVGLPLFFF  
VIWGIFKLTFLVGEYPAWLEQLFGSLEGLVQNSVLPGAVRDLLINGIIHGVGGVFSFVP  
LIVILFFCISILEDGTGIARAFLTDHFLHAIGLHGQSFMPLMLGFGCSVPAIMATRTLK  
SPKERIATILAIPIFISCGGKLPYVLLAGAFFARNASTVVMVMYASGVVLSVLSTFFLRR  
TVLKGQSMFVMELEPPYRIPTLKGVLWHVWEKTWSYARKAGTIILAVSVMWLITSYPKA  
RGIQYEI HARQSVAEAQPGLSEAAISARA EVLVRQYQLEHSIAGQFGKLI EPVIAPIGF  
DWKVGVALIPGLAAKELVVSTLGVLYGAPVDENSELSLRQSLREAPDWSPRIALALMVF  
ILVMPPCFASLATIRAEAGDKWLAFQVVYSLVLAWVISFLVSLAGRAFGM\*

>SPBIB\_v1\_250073|ID:27163272| conserved exported protein of unknown function [Uncultured spirochete bib]  
MRKAGFAMILALLVLCV GILPAGAQPVVSAKQDIAVFALGYGWFIPSQALGTIDLRIQQ  
VFSNIGRFTVFGTAQRLSSEGVQQFIDALRQAKQANFVLPEKYQFGEAFLTKAEFERLTG  
AFIVVVPVVTNFAVYWD SKAGSWNCNITGVT FIDATGGTVISIESIDTSGSDKTNQNA  
VMSAINSIPSELEYRIRAI PAFAQISTRILEAKGSRVKIQLG SNMGLKKGDEYAI VTKQTI  
GGIEDSKETGLLITDVSQQLSMGRVLYRSGALDGNTQLKEIARRGTDLDLYFHMSGGES  
LPGLRATVSRGFYPLRPYIGIQMPLSLAFSFLGVTIIPVNAVIGAEYMMPIGRLHIAPYA  
GVGLTYAHLTAIWRSYESDYLSHIGLQAGGRVGYLLSRDMRLFVDAGLDYWLALDNLLFN  
DYGGVTIGAGISFKL\*

>SPBIB\_v1\_250074|ID:27163273| 2',3'-cyclic-nucleotide 2'-phosphodiesterase [Uncultured spirochete bib]  
MKRFFVILCALLAMTMSLAAQSKTVDLTFIETSDIHGSIYPYNFITAKPAATSLAQVASL  
IKEERSVPGTEVVLLENGDSLQGGQPTVYYNFEKTS GPHIWSQAVNFLGYDAVGVGNHDI  
EAGHAVYDKMYEELQAPVICANAVKPDGTPYFQPYSVIERNGVKIAILGMITPKIPDWLP  
PQFWTGMFEDMVQS AKKWPPIKEKEHPDLLIGLFHSGVDYTYGNVTRDTPNENASQL  
VAEMVPGFDLIFVGH DHAGWSGQGWDPVNKKKIDVKDPNGKVPPIYGPLNAARNVAVVKM  
NLTWNDQTSWDKIVRGGLIDMTKYQDPDFMAKFQPGFDEIKKWVDRPIGKMDGVITTR  
DSMFGDSAFVDLIHQDLSDNPSLGLKPADISFAAPLSADSKIPSSPDGTL YVRDMFN  
LYVYENFLYTMTLTGKQVKDFLEYSYQYWFDTMPNEGNHLINFQKDK EKL VFDNRTNMP  
MTATRYNYNSAAGINYVDVTQPPGNRISISCMSDGRAFNPDATYTVAINS YRSGGGGG  
HLELGAGLDKETIRTMKLVNGATTKDLRYFLLKWFEKQDGPVTVMPIGNWEV VPSDLAEL  
GTKTDYPLLYPSK\*

>SPBIB\_v1\_250075|ID:27163274| Heat shock protein Hsp20 [Uncultured spirochete bib]  
MNKRPYMDIGSIFDDIFEAAKDFGEKMKNFAPGFEGPGPEDNCEGPRPGPGCHGMGGGAW  
FEAHGDENVDYYPNYSYPLNIYMLPKSLVFEFALAGFDEKNMSLSFQGDY MVFSAKME  
MEQPEEGVRYFKRRLKLDIDRQKYYVPADKFDQEKVKA VFRNGILKVTVPPKEV VDTNE  
GIKIEIVKEGE\*

>SPBIB\_v1\_250076|ID:27163275| conserved protein of unknown function [Uncultured spirochete bib]  
MQELICITCPMGCHLSVDTDAQ GEMKVTGNRCVRGEQYAREEIFNPRRVVTFCTAVLPD  
GSLPGPSSNLPRRVVVRTTAAFPKERIPELLDVLRGITVRLPVARGSVVLERALGMEVNV  
VVSRSIGA\*

>SPBIB\_v1\_250077|ID:27163276| FAD-dependent pyridine nucleotide-disulfide oxidoreductase [Uncultured spirochete bib]

MKQLTFDAVVVGGGAAGMSAALELDARGHSVLILEREDTLGGILMQCIHNGFGLIEFNEE  
LTGPEFAQRFEKVSARNIQASLRTTVLDIREEEGRVVYAVSPSQGMMRIEARAVVLAM  
GCRERNRGNIRIPGTRPAGIYTAGLAQRLVNIEGYIPGKDVVIIGSGDIGLIMARRMTWS  
GCKVHAVIEILPYPSGLTRNIVQCLNDFGIPLYLSHLVTDIYGKDRVEGIEVTPIESGAL  
MHEKAFKACD TVLLSVGLVPENELSRNAGIEIQPTTNGPWVDSMLMTSLPGVFACGNVL  
HVHDLVDYVVEEARRAGANAAAWLSGYRPSREIRIKTGSNIRYVLPARLNPERENRLYMR  
SLVVKNDARLEVRDGNVVRSRKLAHVQPSEMLS TLGPEDVAAAGRDSVVEIALV\*

>SPBIB\_v1\_250078|ID:27163277| FAD dependent oxidoreductase [Uncultured spirochete bib]  
MEQYDVAIIGAGVCGANIARKLSQYELDVALLEKEIDVSLGTSKANS GIVHGGFHDHIST  
LKARLELQGALMFDRLHEELDFPFERCGILVAALHEDEMRAIEQLYLQGVENG VIGIEMC  
SRERMLELEPKLNPDVVGGLYAPSGGILEPYRFVFSLVESARKNGVQVKTEFEVAQAERD  
GEFWQIQSKAGETIRARYV VNSAGLHADTISAAF GAERFTIAPRKGEY YLLDRTTKAKPS  
RVIFVPTEVSKGILVIPTVEGTVLIGPTASPAQDKEDFATTRDQLEHILHSARMMVPSI

SENDVITSFAGLRASYGNDFYIANSEKAPAFVQVAGIQSPGLTASPAIGEYVKDLLKKAG  
LRLVEKPSWDPYVHKVPRARDADPYTLDTLVAQDPAYGDIVCRCERVSEAEIVKAIRAGH  
TTLDGIKYYTRAQMGRCCGGFCTYKIIRILMRETGMSWDQITKHGGNSAILKGS\*  
>SPBIB\_v1\_250079|ID:27163278|glycP| Glycogen phosphorylase [Uncultured spirochete bib]  
MRIVSHTIKPALKGRLARLDLARNLWLSWNFDVSLFIRIDNDLWLAAGQNPVKMLGML  
SQEKIDELAADQSFLSDLDEVYARFQRYLKSXPWYRGPSSIIAYFSMEYGLDVSLSPTYS  
GGLGVLSGDHMKTVSDLGLPLVGVGLLYRQGYFKQYLNADGYQQETYPENDWYNMPVERC  
VDQSGAPILITVDMAGRSISAGIWRVDIGRAQLYLLDTNIPENQPEDRTITATLYGGDKE  
MRIKQEILLGIGIRALKALGIKVAATHMNEGHS AFLALERIRSLMEEFHLDFHSAMQAF  
IPTNIFTTHTPVPAGNERFGIDLMDKYFRAVSVGLGLDWNFLSLGRENPFNDQESFCMT  
VFALHLSAKSNGVSKLHGEVSRKMWQGLWPELELKEIPIGHVTNGVYPRTWISHDMLSL  
DRFLGPKFYFEPDNPEVWASVDRISDEELWRTHERRERLVATCRQKLAASYVRLGMPDG  
EVLRSSDVLSPYALTLSFARRFATYKRGTLLEDPRLIKLLSNKDMPLQLVIAGKAHPH  
DQSGKDLIRELVHFSRREDVFGRIVFIEDYDMAMGRYMTSGSDVWLNTPRRPLEASGTS  
MKAGMNGVLNCSVLDGWWAEA YTPDIGWAIGSGEEYQDQDLQDKIEAQDL YDLLEHEILP  
LFYSRGRDNTPRAWAKMRASMKAIGSQFATHRMLKEYYSQYYEAALNESRALEADGYKA  
SVSLAAYIDKVRRAWQRVRIVEFKDDGAPVVSRTTITVSVLVDLAGLSPDDVAVECYKG  
RLSSKGEILDGARLPMTLVGPEGHYFRYQCAMHGEITGQIGHSVRVLPSPALDGRFIPG  
LVRWAQ\*

>SPBIB\_v1\_250080|ID:27163279| protein of unknown function [Uncultured spirochete bib]  
MERFLQRIGCAEDQVIVSFARLIGDQFFAQKKDILVNDENAEYRAPLIAALAGKWLEASA  
QEGMEHPRVLLLAEKGEVLAQLRGLLEQAGIESTICVSKEETESSAERLATASFGISAD  
LFMTAVLEQSFKPREFGLVIIEGADLFGELPSELQRKVVWGYLLPPWERRAVLFAQRLGVR  
AKNTAIDFANSPGTVTLKKARASLDAISAEFYRVLSEEKFKALLSHLAAAGAQQGHAAIV  
FCNLRQTSREVEARLRLNHIPAEHVSAAAPPAKNEMLFQRFQKLQEIGDQQENREQGAEP  
LESPENLESAHMQLVLVVSNDNLEALPDELALFAIHYDIPLDADIYLERVRAMRSRGASM  
LGLVCERYEVGLSAIESRFGIRVECKEATDMANIKDASEGVPLDLERGHVTKRADFPQOT  
GVPETRVSERRAPETRAPAAPDRPRSIQERKMHTRISERGGKFERKKTDRKKGRQQPTRA  
GSKNSDRNPSLYSMSTEERLA YFRNKYRGILKTPSSEASPAPQHGAVSPDPSTNPENDG  
IVKRLIGKFFSGGKAAE\*

>SPBIB\_v1\_250081|ID:27163280| NADH dehydrogenase [Uncultured spirochete bib]  
MATKKILILGGGYGGVWAGKILEKHFRKREDVEITLVDRKPFHTLMTELHEVAGWRTEPE  
SVQVLFKKIFGAKRINVVLDTIEKVDFEAKQATGKVCTYDFDYIILGVGAPEFFGTPGI  
AENAFTLWSFEDAMKVRKHVEEKFYEASLETDPKRKKLLTFVVAGAGFTGIEMIGELLD  
YRDVMCRKYFLDPKEVRVNLNIEALPSILPILEEPLRAKAEKYLQKRRCDVMLNSAIIGAE  
PGKVLLKSGQIVETETFIWTCGVKGSSFAGQLGLPAGKRNRIDCDMELKSTKYPFVYVVG  
DISGLMQEGKPLAQIVETAHFTAEEAAKNIISDIDGGERHQFKPNYHGFMISSIGSHYGVS  
NAGGMKTSGFIALAIKHLINWYLLNIAGINQVWEYLKHEFLDMKNRRSIIGDFASYKIR  
PYWPLLLRMWLGLMWVFEKIGEGWLAFAASGSKSGWMFSPGVVQAGVKAAEATSGASA  
WESAGQAAATAATGAAAAASAAPA VAATSAAASAVASSAAAAAPAATSAAASAAAAAPAATG  
GTQAATQTFKAVWDLTKPIFDPNGLVTWFRHTFMDGIFAYLPYTFQAMIVVMEIGIGL  
ALFGGCFTWLAASIGMCIVFTLSGMFAWNQLWFVFAAILMLGGLGRSFGIDYWLIPAI  
KRWWNGTRFARKWHFYADDPTK\*

>SPBIB\_v1\_250082|ID:27163281| Trans-hexaprenyltranstransferase [Uncultured spirochete bib]  
MTQYWNDFPDIKDFLSETEALILSILENSTLPLREEVGRVLESVGGKMLRPALVYVGGFEG  
LNPDRKKWSKKQEKRLVNIAAAIELLHTATLIHDDILDRASHRRGIPTLHQTLGTTNAIL  
AGDWLLSRCYRIIAQYVHPSRAVLLAEFVSAICKAEINQDLTKYTFALSRRRYLQTIAGK  
TAALFALALHIGSAETGCSTFTTQALRRTGYNLGMFAFQIIDDILDYESSLEELKKPVGND  
IREGLCTLPLIYALEEKGEKIRPLSDIRAHPSVGSVLNLVHETDAIKRARKDAERYTR  
LAHAEIARLPEGKPRRDLELIVNSLLVRTY\*

>SPBIB\_v1\_250083|ID:27163282| Bifunctional protein: zinc-containing alcohol dehydrogenase quinone  
oxidoreductase ( NADPH:quinone reductase) Similar to arginate lyase [Uncultured spirochete bib]  
MASTMKAMVIRRTGGPDVFEEAELLIPEPKAGQVLVKIAATSVNPIDCKVRSGAVAILPP  
FPAVLHGDLSTVVEVGQDVRKFKEGDEVYGLVGTGGEGGALAEFAVCDEQLLAHAPRS

LPLDEAAVLPVVGITAYQGLRRKIRLEKDRMLLVQGGSSGVGHIVVQMGKAFGAQVAAAA  
SSDEKIAVVASAGADWTIRYDQETAQYVERITGGKGFDDVFDTAGGANLPLSFEAARRG  
GDIVTIAARAIVDLSLMHSGKLNHVVFSLLPILYGEGRAQMGGDLEAIARLVDDGLIRP  
IIPRTFSLSSIAEAHRFLETESHYGVVHVQ\*

>SPBIB\_v1\_250084|ID:27163283| Acylphosphatase (modular protein) [Uncultured spirochete bib]  
MSAGRIVFLGWHFHLGFTIIRKRDIQLEHRESVSENMQAFHAIVKGEVQGVGFRMSAII  
RAEQLGLTGWVRNTPDGDVEVWAEGNTQALEHFYAWLQVGPSAARVDEVIKTDEQPRGIY  
KRFSVAF\*

>SPBIB\_v1\_250085|ID:27163284| FAD-dependent pyridine nucleotide-disulfide oxidoreductase [Uncultured spirochete bib]

MKAVDVLLVGGSATGLVAATTAKSNYPEKSVAVIRKEEKVMIPCGIPYIFNTVGTSNNNI  
LPDEGLVKLGVVEIIVDEVLEINGKAKTCTTKNGLEIAYDKLILGTGSLPSVPRWLKADL  
ENVFTIPKNKDYLDQLQQLQTMKKIVVVGAGFIGVEVSDELNKGKEVTLVEILPHALG  
ATFDEEFAAEAEALLIQRGVKLRTNIGIEEILGDKKVAQVKLNNGELLDADAVILSLGYQ  
PNTELAKKMGLELNAFGFIKADQYRRTSMPDVFAAGDCAEKIDFSTGKISKVMLASTACS  
EARTAGLNLVELNTFATFRGTVGIYSTCIGDTAFGVAGLIEKTA AEGFKIVVGSFTGVD  
RHPGKIPDAHKETVKLIVSKHSGVVLGGEVMGGKGAGELINAIGIAVQNHMTINDLLMMQ  
IGTQPLLTASPAAFPLIKAAEVA AAKALKK\*

>SPBIB\_v1\_250086|ID:27163285|copA| fragment of copper transporter (part 1) [Uncultured spirochete bib]

MPVYKTFALKGMTCAACVAANERAVGKLPGIARVSVNLATERMEVEFDPTAVDVAQIQAA  
VKKAGYEAELLEKPSAPPIYEAYGWTRFTVSAVFAVILLYIAMGSMIGLPLPPFIDHR  
TAPLAFALVQLVLLIPVLVAGKSFYIHGFKSLFHLSPNMDSLIAIGTSSAILYSLFSMWR  
IASGDHSASMQLYFETAIIITLIMLGKNLESRSKRRTSEAVRKLMLKLRPAIATILEGEQ  
ERKVPVDDVKPGNLLLVRAGERIPVDGKVRSGNSSVDESMLTGESMPVEKASGAPVYSGT  
INLNGSLVMIAEKVGEDTALARIIRLVEEAQSSKAPIARLADQVSAVFPVVMGIALIAA  
FGWLIAGHTITFALT V FVSVLTIA C PCALGLATPTAVMVG TGKGAELGILIKSGEALETV  
HKIHTVLFDKTGTITKGPALTDVVP AEGY STEEVLGLAASVELASGHPLADAI V SQARE  
KGLAISRPDHVETIPGKGIVAKISGGVAGSATLAVGNAALAESLGISIPKHASDLQEKAT  
QLAGMGKTPMFMKNSLPVGLIAVADQPRPEARAVVAALKKLGIDVAMITGDSRCTADAI  
AAQVGISEVYAEVLPSEKASIIKRIQASGRKIAMVGDGINDAPALAQADVGI A VAAGTDI  
AMESADIVLMHNNICDVATAIHL SRRVIKTIRQNLFWAFGY NVLGIPIAAGLLYVFGGPL  
LSPVFAAAAMSLSSVSVVTNALRLKGYRKPEASCE\*

>SPBIB\_v1\_250087|ID:27163286|copA| fragment of copper transporter (part 2) [Uncultured spirochete bib]

MKLLKIEGMSGHCVMHVQSALEDVPGVKS AKVNLLEREAIVDGDNLDDQALRAAVADA  
GYR VVQIIP\*

>SPBIB\_v1\_250088|ID:27163287|dnaJ| chaperone Hsp40, co-chaperone with DnaK [Uncultured spirochete bib]

VAKRDYYEVLGVPKTATKDDIKKAYRKLAIQYHPDKNPGDKNAEEKFKEATEAYEILGDE  
QKRQAYDQFGFAGVEGMAGTSQQDYANVFHDFEDLFSFGDFSSIFGSFFGEGAQQRGSS  
RVNRGANLRYDIELPFEKA VFGTTIEISY SRDDTCKTCSGTGSRDGQGRKICSMCKGTGQ  
IRRSSGFFAISQPCPVCHGEGTVIENPCPDCGGIGVVKKQKIRVTIPAGVEDGKRVTVP  
GQGNAGPNGGPPGDLHVFIHVRPHDIFERQDDDL YCAAYVDFATAALGGEIIPTLEGRK  
ISVQVPAGTQSGKLLRIKEEGVPISGGRRGDLYIKIFVKVPVRLSRRGRELLEEFRTVEG  
ETNQPELLRLKDVPH\*

>SPBIB\_v1\_250089|ID:27163288|dnaK| chaperone Hsp70, co-chaperone with DnaJ [Uncultured spirochete bib]

MGRIGIDLGTNSCVAVMEGGEPIVIANSEGQRTTPSIVGFTAKGERVVGQPAKNQMIT  
NAENTIFSIRFMGRRYAEVQQEIKMVPYKVIDNGNDVRVEAGGKLYSPQEISAFILQKM  
KKAEDYLGEPVTEAVITVPAYFNDSQRQATKDAGRIAGLEVKRIINEPTAASLAYGFNK  
DQKKEKTIAVYDLGGGTFDISILELGEVFEVKSTNGDTHLGGDDFDRRIMQWL VDEFKN  
DTGIDLSQDRMALQRLREASEKAKIELSNMQQTEINLPFITADASGPKHLQKTLTRARFE  
QMCMDLIERTREPCMALADAGLTA AQIDEVILVGGSTRTPRVQQMVREIFGKEPSKGVN  
PDEAVAIGAAIQGGILGGEVKDVLLLDVTPLSLGIETLGGVFTRLIPRNTTIPCRKSQIF  
STAADGQTA VSIHVLQGEREMASQNRTLGRFDLVGIPPAPRGVVPQIEVTFDIDANGIVHV  
SAKDLGTGKEQKIRIEASSGLNDSEIDRMVKEAEAHAEEDRRERERIDARNEADSLIYTT  
EKALKEVGDKIGAGEKAAVENAIKDLKSVMEGKDTELIKQKTEALKQASYKLSEELYRNA

SAQSGGAAGGSASGAAGAANESASSESNDQTKNADDVDYKVVDDDK\*

>SPBIB\_v1\_250090|ID:27163289|grpE| Protein GrpE [Uncultured spirochete bib]

MSKHKHEHGQSSNTMKPEQTMSAESLSSLNQQAEGQAGVPEVEIQPDAEPDMAGQPGAQ  
PGA VTTPEAQLAAAKAEIELLKAQLAELNDKYLALAEQVNFRKRMTKEKEEYQQYALST  
LLSDLIPVLDLDFDRSLEAAAQSQNDVSKVIEGIRLVQKRLLDTLANKYGLARYDAEGSVF  
DPHMHEAMFSDQGDVTEPTVTQEFMPGYKLHDRVIRA AKVKVTPANNGAEKAPAQMEKA  
QGQAQDESSTANSSSSGQNDV\*

>SPBIB\_v1\_250091|ID:27163290|ccmL| Carbon dioxide concentrating mechanism protein CcmL [Uncultured spirochete bib]

MRIASVIGTVVATMKQEKL SGRKLLLVREVNTAGKASGEPFVAIDTV DAGKGDIVVVTEG  
SSARQTTFTDGLPIDA VIVAVIDSLEVEGKV TYRKQ\*

>SPBIB\_v1\_250092|ID:27163291|eutA| reactivating factor for ethanolamine ammonia lyase [Uncultured spirochete bib]

MDNTRRMISVGIDIGTTTTQVVFSELSLVAIARAGQIPRLDIADRSVLFESDIVFTPLID  
SRTIDADKLSIIIRAQYEKAGILPSQVETGAAITGETARKQNADKVLAAIAGLAGDFV  
TVAGPNVEGMIAGRSGSAAAYSRQHFATVANIDIGGGSANGALFHLGEIEASAAMNFGGR  
VIELDGPVVRAITNAGEAICASVGIKLKPGRPSLGLDRKITDAMAELTILLVEGGTSPL  
AEKLYQTAPLPGNANLKNIMFSGGIGYYYYNPIGLNSVEDVACHDDIGPLLAESLRKETR  
FSRYTILQPKETRRATVLGASAQTLTSGSTIWADPSILPLKNVPVTALVSGSDPSDITE  
ALRRWDLNPSNDIFAIALDMQHGLDYKELSRIAENLAVFAKDLPPDKPLIVITKRDYAQS  
LGQTIKIDKNRPLLIIDQVGLEEGDYIDIGSPLMDGRV VPLVVKTLIFYH\*

>SPBIB\_v1\_250093|ID:27163292|eutB| ethanolamine ammonia-lyase, large subunit, heavy chain [Uncultured spirochete bib]

MALRTKLF GKTWEFPDIRVLMGKANEKSGDRLAGLAADSAEERAAARIVLADIPLSALK  
ENPAVPYEQDEVTRVIQDGINETIYNEIKGWTVGELREWLLSEKSSGDDIARISTGLTSE  
MIAAVAKLMSNIDLVAASKIRVERHAVNSIGLPGMLASRLQPNHPTDSPEGIRAALYEG  
LSYGS GDAVIGINPADDSYASVARLLDMSYDVVKTWEIPTQTCVLAHVSTQMRCLKSGSP  
VGLVFQ SICSERGNASFGISVGM LDEAFTLAKKYCYHGGPHYMYFETGQGSALSANAHN  
GWDQLTMEARNYGLARRYSPFIVNTVVGFIGPEYLYNSEQIHRA GLEDHFMGKLSGISM  
VDVCYTNHANTDQNASENLSVLLTSAGCNFFIGVPMADDAMLSYQSLSFHDIATLRELF  
LRPSPEFEAWLESIGLMRNGRLTERAGDASFFLSR\*

>SPBIB\_v1\_250094|ID:27163293|eutC| ethanolamine ammonia-lyase, small subunit (light chain) [Uncultured spirochete bib]

MIDAKTIEALVDAVVSELES LAEKPKIAAAKPQSQQGPQS QPADGSAVAPAMQ TALMSGV  
KNPVDPEGLLALKQTTTARICAGRAGPRLRTEDLLAFQADLAITKDALEKQVDPLLEEF  
GLFTVTRKITGGKEEYLLRPDLGRRLSDEAKKIISERCIRNPDIQICVGDGLSARAIEAN  
LAKIFPVLKAGCETAGLSMGTPFFIERCRVGMNDIGDLLEPKVVILLIGERPGLGRADS  
MSAYMGYKPHAGLTDADRDVICNIFDGGGVNPLEAGAYAIRLAERMIKAGASGIQLKLE  
GEAK\*

>SPBIB\_v1\_250095|ID:27163294|eutL| putative carboxysome-related structural protein with putative role in ethanolamine utilization [Uncultured spirochete bib]

MSVLDPIFAHALAVRIIPKVSDEYARAIGLEPSQTS LGFITADNDDALYV SIDEATKMAD  
VEVVYAH SFYAGARHSSGIYSGEI IAMLGPDPT EVKAGLDAAIRYLETRALWYSADAHD  
GVAFFPHVVSRI GSYLASVSGLPEGASVAYLVAPPLEGSFALDAALKAAAVRIAAYTAPP  
SETNFMGAILTGEQSACEAAALTFQEAVLDVAQHPIMY\*

>SPBIB\_v1\_250096|ID:27163295| Acetaldehyde dehydrogenase [Uncultured spirochete bib]

MTEIFDADLVSIQEARRLANAAKEAQKKWAGASQEEVDRVCAAMAEAGAAA AEKLARLAV  
EETGFGVVEHKVLKNLLTSRDLWTAIRDVKTVGIIGRDESRGLVRIANPMGVVVALIPST  
NPTSTAFFKTMI AVKARDAIVVAPHPSAVRCTFEATRVM AEAAVKAGAPEGLIACMEHVS  
LQGTDALMRHKATSLILATGGTPMVRAAHSV GKPAYGVGPGNVPCYIDRSADLPQAARLL  
VASKAFDHSVICATEQA AVVDKPIAGRFAELVQAEGA YFVSESEANALRRYLFPD GAIN  
PTAVGKSPQVLAKAAGFSVPDSARILARLSKVGPEEPLSREKLT TVLWYEV DGWREGC  
NRSLELIHFGGEGHSIALHARDEAVITAFGLEKPVHRIVNTMSSLGAVGVTTGIAPSMT  
LGPGGVGGAITGDNISVQHLFTVKNIVYGLRDAPAPAMTDGTD FEHLHAPRTTVSAEEIE

QIAQRVLAELQNRHVQ\*

>SPBIB\_v1\_250097|ID:27163296|cchA| putative carboxysome-like ethanolaminosome structural protein, ethanolamine utilization protein [Uncultured spirochete bib]

MAELSQLALGMVETKGLVGAIEAADAMVKAANVTLIGSEYVGGGYVTVMVRGDVGVKSA  
TDAGGAAAKRVGELVSVHVIPRPDPSVEMILPQKTKGSFSGRGND\*

>SPBIB\_v1\_250098|ID:27163297| conserved protein of unknown function [Uncultured spirochete bib]

MAESFQLRVYSYLDRMQPQFAAFVGTITQGDLPAGMAALYIEVAPGNEVFRLVDIAVKT  
TEARPGAQIVEREFMFEIHSQSQAQVLEAGHIVLDRLSLHEEERIKPFIASVQVITNVD  
PYQAQLLNRFRRGSMIVPGETMLVLECAPAA YINFAANEAEKGATIKLIHISSVGRFGRM  
WLSGSESEILQARDAAINALES LN GVEGR\*

>SPBIB\_v1\_250099|ID:27163298| protein of unknown function [Uncultured spirochete bib]

MIITEAELREVWKNHGHTMPEIPPGARLTPAARDFLVTIGSSAIANPQSVETGVSNNVS  
GGSMELSASRGRILITSTDIDDILAAHPATLIVHPEVTITDVARDRNRNAGIRIIPFARE  
KPAAPGPISYNMTAQPPSAMLAAQARAGRTETAPQNSRNEQNDET FNAVKKAVMARLNGE  
VDDYLVDAVLKRVLGLTK\*

>SPBIB\_v1\_250100|ID:27163299| ABC transporter substrate binding protein [Uncultured spirochete bib]

MKKISIVLIVAMLSGSMFAAQATSTQDMNALIAAAKKEGQLTVIALPRDWVNYGEIIDTF  
SKKYGIKVNELNPEGSSGEELEAIRANKGNKGPQAPDVIDVGLSFGPLAKQEGLIAPYKV  
QWDSIPNEIKDKDGYWYGDYYGVLA FEVNADIVKNL PKDWS DLLKPEYK GK FALS GDPR  
TSNQAIMTIVAASLSQGGSLTNMEPGLRFFDKLNKAGNFVPLIAPGTVASGETPITVRW  
DYNALSNRDKSAGNPNI AVIIPETGVVAGVYVQAI SA YAPHPNAARLWMEFLYSDEGQIL  
WLKGYGHPARFNDLAKRNKIPADLAAKLPPASAYAKAVFPTIEEQNI AKKYIAEQWDNIV  
RIDVQKR\*

>SPBIB\_v1\_250101|ID:27163300| ABC transporter permease protein [Uncultured spirochete bib]

MTDSLKKERSNQKGAEQTTGASGALSLSAAKSNWKDWLGLIPFFLFIFAFMVIPAGSLL  
VGA FQNRDGSFTLINFSHLLKPNIISSYLITIRLSATTALLGGLIGFLLAYAITIGGLPE  
GVRSFVSTFSGVASNFAGVPLAFAFISTLGRVGLVTVILKTVFGIDLYESGFNLYSFWGL  
ALTYIYFQIPLMVLIIQPALDGMKKEWREASENMGASTFQYWFHIGIPVLLPSLLAALIL  
LFGNAFGAYATAFSLTGGLINIVPILIGAQIRGDVLHDPNLGYAMALGMV LIMA I TILAY  
SWLQKISSRWVK\*

>SPBIB\_v1\_250102|ID:27163301| ABC transporter permease protein [Uncultured spirochete bib]

MSGKGTGRKALSWVWLVLGLAYFFIPLISTFLFSLKGGKGVLSFVAYQHVFADPNFLKTF  
TFSLQMSIYTILVGLLIVPTAIWINLKLPKVKPLIELFSLMPFVIPPVLAFLIKSYA  
RPPLALVSSPALLVAGYVVISFPYIYRSIDTGLT SIDLKV L TEAAQSLGAGWGSILFRVI  
LPNLRTALLSAIFLTFATVIGELTLAVLLAWPAFGPYMAHVGRDLAYEPAALAILSFMMT  
WGSISIIQILSRGIPGSRSNVGGGLH\*

>SPBIB\_v1\_250103|ID:27163302|potA| Spermidine/putrescine import ATP-binding protein PotA [Uncultured spirochete bib]

MGFIELHGVSKSFGKNTVVRNLFLSVEKGEFVSFLGGSGCGKTTTLRMIAGFEIPSSGKI  
LVDGKDVSNVPPAKRNLMVFQNYALFPNMTVRKNIGFGLKIAGVSAHEIEKRVD EMLAL  
IHMEEFANRYPHQLSGGQQQRVALARAIAVRPKALLLDEPLSALDAKIRVRLRDDIRAIQ  
QKLGITTIYVTHDQEEAMSISDRIA VMRNGKIEQIGTPFEIYNRPATSYVASFIGTLNLL  
EATVVDANNGIVSIGSMKLTASSLDRMQDKPVKLTVRPEALSFANPADPVTADTNVLSG  
TIETIKFLGSTVRYVMKFGDTFMYMDRFNNPQLELPKKGDPVSVIFSKEACRILPADEES  
ANSLKGTEEEL\*

>SPBIB\_v1\_250104|ID:27163303| RNA polymerase sigma-54 factor [Uncultured spirochete bib]

LQTQRPVLAQQQQLKLSPRMIQAIRLLALPLQELSEQIRQELENPALELLTDNAELSLD  
VMEDSLDTFRDSEDTLREAEYSDEAFGFNNDENDRTAIIIEQTIA TEESLQEHL SGQLG LL  
PLNDAERQVAERLIQNTDENGPHILPPQEICPDCEPGTLERILSLLQRLDPPGTCTSGYR  
ESLIVQAQIAANAPRKTIEVLTSHFEDLQTRNRS AIKKS LGLNDRELDHIIDFIRTLDPF  
PGRSFSRARPRYIVPDLAMWLEDGEIKVRLNDDIVPKLGINRLYTELASRASRGEAEKFA  
REKVENARFFIDSIKRRNETLLKTAYAIADAQKAFFVGGPQALKPLTLKEIAQKIEVHEA  
TVSRVVNGKYVQTDWGT FELRRFFTNAVNHDNGENISKEAAKAQISQIIDELASRREKIS  
DRIIAEILARRGINVARRTVAKYRSELGK\*

>SPBIB\_v1\_250105|ID:27163304|raiA| Ribosomal subunit interface protein [Uncultured spirochete bib]  
MKIDVRSVHFDLSDQSRQYLDTKISRIDYAKDMIVDLLFVFTK DAGQFRLEVTANFRW GK  
QAHIVETSLELNP GIDVLIDKLDQKIVKEKEKIQEKK\*

>SPBIB\_v1\_250106|ID:27163305|hprK| HPr kinase/phosphorylase [Uncultured spirochete bib]  
VKEQEPVNF TVLDMLSLELKEQNDLSLRCVAGRAGLSREITVPDLNR PGLALAGFYDSFA  
WERLQIFGRGESAYINKIEADGVDEPIYAKLFSYQIPCCIFTNNIQPTAHFAAAAADAAGC  
PVLITLSSVEFSIRVIRILHDIFAPKIIMHGVLVEVFGIGILLGESGVGKSETALALI  
ERGHRLVADDVVEIRCLNGTLLMGQGTNKVIGHHMEIRGLGIINITHLFGVGAIRDKKQI  
QLVIQLEDWDPNKVYDRIGMDEL TIDILGVKVPKLEIPVKPGRNIPIIIETAAMNERLKK  
MGYHSAREFNQNILRWLESESARAMYFSRDDY\*

>SPBIB\_v1\_250107|ID:27163306| Transcriptional regulator, LacI family [Uncultured spirochete bib]  
MKNSKISIIYEVARLAGVSKSTVSRVISDRGGSVSPETLERNRAIEQLGYRKN SIAAGLR  
TRKTYIVLVMIPDVANPFWSEIARAVQDKLEPESYSV VIGSTYWSEEREARYYELAQMSR  
FDGVILNSVTDNIELIKKLGVP AVLIGERVAAQNIDTVGTDTMQATKVGMQYLYDLGHRR  
IALATSEHGSEYLSLRARAYKDFLHEKGLPFDPSLVFSVNLNEEGGRELAKRFLAMPDW  
RNRADSLFCGNDIL AIAAMSEFRKFGIIPGIDISIIGMDDVPAASQTY PPLTTVRKPRER  
IGQAAAELLLKRMENPAGQPEKHLFPGELVIRDSVIDRRKR\*

>SPBIB\_v1\_250108|ID:27163307| ADP-ribosylation/Crystallin J1 [Uncultured spirochete bib]  
MKTRSEVLSDRATYESRAIGAFIGLAIGDAVGD LGRSQEHRNKYGLITKLLDDGKSTDDT  
EFGVLTARALLDTKGALTSDTAASAWRRYILDRGGAKKRAGRPLYGAIENLSRGMQPPLT  
GRYNVMNIDDGAAMRASPHGILWAGDPERAAASAAADACVSHDADGIWAAQATAAAVAIA  
IANGSVDEIVEAARRCLPAGSWIASAMNTAMDICNRHPDIEEA YEELHTKLWTPEHAAAP  
EAIPQMFAIFRLCAGDPRRGLLWSANFGRDADTISGLVCSLSGAVHGAEAFPTEWTESLR  
KPSGTCLDFAAEEDIVSLATELVALSCELGA\*

>SPBIB\_v1\_250109|ID:27163308|lpIB| Protein LpIB [Uncultured spirochete bib]  
MVALAKKKEWSLLLLLAPALLYFLIYHFIPISGMVMAFQDYRIFGKSPFVGFKHFRILFA  
SPAFLQVLRNTLIISFMKIVLFFPLPIIFALMLNEVRSSILRKFIQSTTYLPHFLSWVVI  
AGIWI AFLSPANGGLNQLREMFNLAPKDYMTDKG AIRWVLFASETWRSLGWDSIIYLAAL  
ASISPSLYESADLDGAGALQKMR YITLPELLPTMVTVFILNMGFFLNAGFDQVFNMMNDS  
VISVVDILD TYVYRIGLLNMQYSFSTAASLFGKVIGLVLILAAHQGSRKITEKGLW\*

>SPBIB\_v1\_250110|ID:27163309|ytcP| putative ABC transporter permease protein YtcP [Uncultured spirochete bib]  
MVKKVKTPAVELFWRWLFTALLLLVCVIVLVPMLNLLALSLSNPARVPEVRGLTVFPKGF  
SLINRYVLAANPLFVRSFLNSVFITVVG TALNLLVTSMAAFALTRPKLPFRRFFMVLIII  
VMILEPALVTEYLVIKKIGLMNSLWAVILYKTVNVY YLILMRYFEEIPPSLIDAAQVDG  
ASNMTVLRKIVMPLAKPALATLGLFYGVFHWNEYFRASIYLTDPMKYPLQLILRQFVVD  
DTASLIGSGTLFSYDEAARLSYDALQASTIIVAILPVLIVYPLILKYYARGVMEGGVKE\*

>SPBIB\_v1\_250111|ID:27163310| Extracellular solute-binding protein family 1 [Uncultured spirochete bib]  
MKKHSIVLWLMVAMLVGTGVALAGA QPKVRLVLKDLDTDPNAAQFIQLIEKGM AAAGTPVK  
IEIVKVP SGNYAEKISLMIMSGDIPDIIYFQGGDDKIAMQN LLEDLRPYVAKSKYIKNVL  
DPHSKTRLESYPYL VVWAPPRVRAPVIRKDWFDTLPSAKAVATNPTVD TYALFKDLVQK  
KGAKFGISITGATNGVEELDSIFDGAFGITSTWMKGADGQWVYCRVTPNEKQKLEFYAKL  
YKEGLLDPEYLTKKWD TKEQVFYEGKAGIAGVAPGSIDVYANKMMKTQNTTLVPLPPA  
GKAQGLGPFVDVIKESRGFAIPVTSKVKDA AFAVLDFMWSPAGLKI AKLGIPGLHYIEEP  
NRYVLTDKYAEWYNGWFGDSFNGFV PDKPLSRPIMTEAAVEAGKLA VKYMMPDKTFLIPE  
QYIANWDAMTNLYKEYNADIVTGKKPISAFDEFVQKWYSAGGTELTKYAQTKLK\*

>SPBIB\_v1\_250112|ID:27163311| ADP-ribosylglycohydrolase [Uncultured spirochete bib]  
MPTIPSDYLERVYAGLLGKNIGIRLGAPVEPAIWTYERIREVYGDITSYIKPYRNFAADD  
DANGPVYFVRP LLEKVERLRNKEGGWLGSLPQSAVGAGEGNPVAPLAIEPSEVARAWLDY  
SREGVGMFWWGGYGRSTEHTAYLNLKHGVPAPESGSIARNGKVTAEQIGGQIFIDTWGLV  
WPSNPEMAAEYAVRAASVSHDGEGLHGARFIAGCIAAAFRET DVEAVVGAGRAMLPADSA  
YAAVVDVAVLRFHAQHPSDW RACQEYLLAEWGYDKWPGLCHIIPNAGVCVLALLY GKG SFA  
RTVEIATMCGWDTDCNAGNVGTIAGVLYGLDALPAHYRAPVND SIVLSGLPGTLNILDIP  
TFAKRVAEAGYMLAGEAVPASITEALQRGDGERAIWFD FVLPGSTHGMRVSDPTRFAARH  
RSGALEFQFERLVKEESGKLFFKPFYRRDDFDDERYNPIFSPIARPGQKVRIEFMLERWE



QSIGVEGYVRDTFTRQDIITGTIFPQEGEPCRLDFQIPSLDGSFPDEIGLKITSFSGK  
GKRDSGRLFIRHFSIEGKASYTIDMAKQSVFEGCVTPFSDGGTWSIESGRLHLMTPVQA  
ASYTGGYRVGDQRITAQVRPIAGDCHMLLVRTQGATRGYWAGFDGPGHVAIYKNDAGFTR  
LANAEYSWQAGRDYVMALEAIGSSICLSIDGEKVLEIDNDRFDSGMLGCGTLRASRALYG  
PFTVEEL\*

>SPBIB\_v1\_250113|ID:27163312| putative HpcH/HpaI aldolase [Uncultured spirochete bib]  
MTEYTPSTAGTLSKSDCLVVYRPSKEPVSVTVRSSVGRLEFRSIEDTAKSMLGVFVGVKGTG  
LLEIEDDGALNLVLSARIETTLRLAGFELNISLLERDRTFSAAKIQREPSAKQLPRRRL  
YIPGNQPNLMINADLFGADTLIFDLEDSVPPERKLEARILVRYMLSDTHLFRESELAVRI  
NPIDSSCGREDLEEIVNSRPQAIVLPKCESARDIQVLDAELARLEAREGLPLGSILILPL  
IETAAGVLAAKEIAAASPRNAALCFGYEDFISDIHSSAGERSLRSASTPANHDGEMPHSS  
SQPEALLAKQMIVLAARAAGIDPLDSVISDTEDKEALRSSCEEARMMLGMSGKAVIHPVQI  
PAVKSAFHPSEEEIMQAKAIVEAYERSVVEGKGTAAALGDTMIDVPVVERARLLNDYRIG  
D\*

>SPBIB\_v1\_250114|ID:27163313|citF| citrate lyase, citrate-ACP transferase (alpha) subunit [Uncultured spirochete bib]

MTIGSGTDMEWKTNALGRAIPLEIEGRKLVFAGAFADPTGAAIAASKDISTQSGKKKLR  
PVPWRGKPKDKLTKSWDDLFDRLDIHDGATISFHHHLRDGDAIVLEVVKRLAERGIRNLT  
APSALFSVHDALVPYIRAGVITKIEGSMNGAVGAACSRGEMPKTCVLRSHGGRQRAIQDG  
DLKIDVAFIAAPCADAFGNANGLYGKSACGPLGYPKPDSEYANKVTVITDNLVSYPCLPW  
AICGSNVQDYVLQVESIGDSSKIVSGTTRLTRSPQQLLIADLTARFIEAAGLMHEGFSFQA  
GAGGISLAATVFLAERMRRAGVKASFAHGGATKVLVDLLKEGLLSSIVDLQSFDLDAVRS  
CAENPSHVASDPFISYGPRSAGCVANMLDVAI LGATEIDLGFNVNVVTHSDGLLLHGIGG  
HSDAAASAGCTIITAPFRKRIPIVREEVTTVTCPEVVDVLVTERGIAINPRREDLLER  
AKKAGLPCIKISELLHDVREITGAPELPRFKDRVAMIEWRDGSIIDVVREIESI\*

>SPBIB\_v1\_250115|ID:27163314|ptsH| Phosphocarrier protein HPr [Uncultured spirochete bib]  
MVELETTIKNRAGIHARPSALIAQTAIKFASRVYLEKSGNRINAKSIMGIITLAASFGTK  
IKIITEGPDEQQA AEAIKALFESGFNEELG\*

>SPBIB\_v1\_260001|ID:27163315|argD| Acetylornithine aminotransferase [Uncultured spirochete bib]  
MKERFMNTYARTGLVLDHGVGARLFTVDGTEYIDFTAGIGVNSLGHGHPRLVEAIAAQA  
KIMHVSNYFLTEPSIELAEKLTEATGFDTVFFCNSGAEANEGMFKLARKYGSSKNPDKNV  
IVTLKQSFHGRITTTVTATGQDKFHKFFGPFVYAEPEPIAGLDALLGPNVCAFAFE  
PIQGEVVRPLSRAYLQAAEKMCRRERDILFCADEVQTGVGRTGAVLACERLGVPRDVTAI  
AKGLAGGVPIGAVLARGKAADVFPQGDHGTTFGGGALAASAALVVLSELESPGFLDEVDQ  
KGRHLMELVEGFRHPLVKDVRGMGLMIGIGVKVDPHKIVDAARAHRLTLTAGDDTVRLL  
PPLVITMEEIELGVAALKQALDDVSSAPNLVPELK\*

>SPBIB\_v1\_260002|ID:27163316|argB| Acetylglutamate kinase [Uncultured spirochete bib]  
MDEQFNADVLEALPYLRRFSGKIIVIKYGGAAAMINEGVRQSVIQDLILMQQVGMRPVLV  
HGGGPEIDRMLKKNLKESELFVEGLRYTDDDETMEIVQMVLGKVNKDLVELFSRMGGKAVG  
LCGSDGGLFMANRFRKNGQDLGLVGDVQSVNTELLRLLDNGIIPVVASIALRNDEEGGF  
YNVNADTAAGALAIKAEKLLITDVPVGMEDKSDLETIREMDVQMAKSLIKRGVIKA  
GMIPKVEGCLQALAKGVSAAHIVDGRSPHSLVELFTDTGMGMTMIR\*

>SPBIB\_v1\_260003|ID:27163317|argJ| Arginine biosynthesis bifunctional protein ArgJ [Includes: Glutamate N-acetyltransferase ; Amino-acid acetyltransferase] [Uncultured spirochete bib]

MKQTRGGVTAPKGLASGVHVGIRKNREKKDLALIWSEVPCAAAAYTTNRVKGQPLIVT  
QEHLADGRAQAIANSNANTCTGEEGIKAARRMAELVAQHLPVKAEDVVVASTGVIGQQ  
LDVSVIEAGMGELVAGLSKGSIDAREAIMTTDTMKKEIAVVEEIGGVLTIGAIKSGS  
MIHPNMATMLGFITTDCAITSEMLDKALKFAVRKSFNRVSDGDTSTNDMVAILANGMAG  
NPLIDQEGNNFDEFDALEFVCVELAKMIARDGEGATRLIECTVSGAVSEEQAEALS KGI  
ITSSLVKAAMFGADANWGRILCAMGYTRNDFDPDKVDVAFESPRGYIEVCKAGAPLPFNE  
EKAKKILNNQEVEIIVDLHAGDAEATAWGCDSLSEYVVRINGDYRT\*

>SPBIB\_v1\_260004|ID:27163318|argC| N-acetyl-gamma-glutamyl-phosphate reductase [Uncultured spirochete bib]  
MIHVIGILGATGYAGLELTRILLQHPVDRLSASSVSFEGKSLEDVYPSMVNVVDGSALPP  
LEKAEDVMARADIVFSCPLPHGHAETAGWQCVEDGKPFIDISADFRFGTHEELFKK WYGAG

YEYPEVHAQAVYGLPELHRTAIKSARLIANPGCYPTAAELGLMPALQEGIADLSSIVITS  
MSGVTGAGREPSQTTHYPEAADAASPYKVGSHRHQPEIDLLLSEMAGA EVHSVFTPILAP  
MNRGILSTICFGLVHTISAADLHALYADRYAGEPFVRLPLGSTASNRFVKYSNYCDISV  
HLSADGSKAVIISAIDNMVKGAAQAVQNMNILLGFDETEGLRFIPPAF\*

>SPBIB\_v1\_260005|ID:27163319| protein of unknown function [Uncultured spirochete bib]  
MENLLAEKTDSYRLQAIIGVVLKAGNIENAI AFCFALAAAALRRA\*

>SPBIB\_v1\_260006|ID:27163320|hppA| putative K(+)-stimulated pyrophosphate-energized sodium pump [Uncultured spirochete bib]

MLTSGVLWAI AALLLALLYSLVTSSRIRKIPLANSDIQRISGYIEEGAY AFLTREYRTVA  
YILPIVALMLLFWNVGIMKLQSI SFLIGAILSASAGWFGMSIAVKANSRTAEAAQKGIQP  
ALRVAFSSGSMGMTVVGLVLLGISGVLG LLLLIPGADSVLGETIFPIVSGFSLGASMMMA  
LFARVGGGIYTKAADVGADLVGKVEVGIPEDDHRNPAVIADNVGDVAGMGADLFES  
YAGSIIGCMVLGIAVQASPFMQIKLSILPLIAAGTGVIASLIGTLFVHINRSGNAQKALN  
AGSVGAALISMLLLL PVIRLTIGTERFVSGTHEAGWLG IYFACVIGLAAGTAIGLITEYY  
TGS DTPPV RKIAKSCTTGAATTIISGLGVGMSSTVFPI LVIGLAIGFSNWL AGLYGIGMA  
GLGMLLTLGIQLSV DAYGPIADNAGGLAEMSEMPPEVRKITDSLDAVGNTTAAIGKGF AI  
GSALLTSLILIVAFISATGLQPSVMNLTNPHVLIGLFIGAMIPFFFSALAMD AIYQAAFA  
MIEEVRKQFRSKPGILEGTEEPDYRSCVDISTQTALKSMILPGISAIAAPILAGLIGGPA  
VLTGLLVGATVSGGLLAIFMSNAGGAWDNAKKLIESRPEGGKGS GDHRAAVVGD TVGDPF  
KDTAGPSLNILIKLMAIISLVLAPLLKLA WG\*

>SPBIB\_v1\_260007|ID:27163321| conserved protein of unknown function [Uncultured spirochete bib]  
MASEKHYMIIHPNHSLIASQLEPEHFIRHYVQGSTRYFEGRLIFVEVDPDYRHPYFDID  
TAY AELKPHEDGRPKATKFIKSYR VLEHVDYNALGKLYISNSLGDYVELESKP YEPSIDT  
DEFRIMLEVNPLRFIVLTKLNCHDFGQFITDPRNSKGAPKMAFTLLEFDTQEFLKEYEEN  
PLIRCYVPGIHPARLVSAIEEVRTTPGKVVKGISLDCPIDRISYKYLKEGFMFAEHGKPC  
KFYPYLDLDTVERKFKFWKSM\*

>SPBIB\_v1\_260008|ID:27163322| conserved protein of unknown function [Uncultured spirochete bib]  
MELKIGLVAEKEIVVEDKHVASHLGGSGVVPVYATPTMVLHMEETS RQAVDHL LGPDGATV  
GAYMAVKHLAPT PKGMRVRIRAELTKIDGRMLTFKVEAWDEVEKVG EAEHVRAIISMAKF  
AERIEKKKRAAGA\*

>SPBIB\_v1\_260009|ID:27163323| Alpha/beta hydrolase fold protein [Uncultured spirochete bib]  
MIQLQTLIVLPSVANHGDLGNRARI LQNEQKVRY YWHMAVAVALYLVA VLLLAGIAYPLM  
FRPKCRSLEFTKQYSLEHGEIDESFLGLDWKDFSFSPNGYTLRGQYLRGKEDAPAALFV  
HGITWTRYGM AKYMKPFIERGWNVA AFDLAGHGESKAPRRFHPSFGFY EKFDVKEGVKAL  
RALFPKALCVGLFGESLGSASVLQYALLAKKDSSAEVDFIVADCSFSSAWDELLEQLRMV  
HVPNCIAWPAAQGV RGLARLLRGFDLKD AAPAKAIMEADMPILFAHG MEDRYVPTIMSVR  
MASARLSGGIGLTELVLIPGATHAKGILTDKERWLSAVNAFIDRVCD AKKKAAAK\*

>SPBIB\_v1\_260010|ID:27163324|trpS| Tryptophan--tRNA ligase [Uncultured spirochete bib]  
MERKRILTGDRPTGKLHLGHYVGLANRVRLQDEYECFFIADLHTLTTKPEKENIEQLS  
ENVHSAVLDYLSVGIDPKKSVIYLQSAVPEVTELA LFFQNLITVPRLSRVPSLKEMAQNA  
HIEEMPFGLLGYPVLQAADILLPRAHLVPVGKDNEAHVEVTREIARRFNLYGETFFIPE  
AMISEFGSLAGTDGNAKMSKSLNNAIFLSDDEKTVIKRVMSMYTDPKRIRADIPGTVEGN  
PVFIYHDAFNPNKAEIEDLKARYRAGKVGDI EVKEKLARALNTFLDPIRERRAYYESQKG  
LVEEILYEGTMRMREEARQTL SLAKKAMGMSSVWNRISRKAERQKKAASGQVGE\*

>SPBIB\_v1\_260011|ID:27163325| putative Diguanylate cyclase [Uncultured spirochete bib]  
MEIDSSAIRSLFIDSSLSEFFDETDLFYIDFQSSIARSCSTLRYLGYEDADLLDILGAFP  
VHEADRERVELMQKRIESGETDKVIDSFRVASKKDSRFPWLRFSIKVLGREPDGKPTALI  
GHVTDVDDLIASQEEIRERLVEIDAMRELIGAINKSLDFEETFKRIIEQLHRIIPFDRAT  
VQAFENDSLTVIAGYGYPKSDIMGLVFP AKGIDNPVRAIQTQRPIVCNDVSHDFPGFIA  
PSKDFTSLSWL GIPMVYEGQAIGLIALDSHLPNFYTDQHVRVATAMA EHIATAFEHARSH  
QLVTVQAMTDRLTGLANRYGLEMRGTELFQKAIENDQPIGVFMLDIDHFKQVNDMYGHSY  
GDMVLQQIASTIRTQIRNEDYAVRYGGEEFVLLPGLGPRESLIVAERLRIKISQTEVEK  
GRKLPTV SIGIYAAVPGSLDILHEFIRKADLALYTAKEAGRNRSRVWSTSPEFYVSE\*

>SPBIB\_v1\_260012|ID:27163326| protein of unknown function [Uncultured spirochete bib]

MVYMNFAKRLFDAAMARHAAEWYGISKAEGALGNKGQVQKIAENLRALQRGLTGDRAR  
VASGYMDEKSALQAYLLYWPVSFYETA AVLAE LAERRTL PNIQT VLDL GSGP GPGSFAA  
SLFGAERAVLVDASQAALDVASKIAEKGRQGGSSMELSALAKDLQDFSVGILSRFSSSSI  
EPSAGFSAGRALLEPPFDLIASHSINELWHDEPERIERRRNMLLSLLPALREGGLLII  
EPSAHYTSIPLLALRDSLLEAAGSFTGGNFAVSDEARATLAADPAA AHLFCVGPCHSDP  
CPMRAIGDRPCFSEWKWDAPTLVRKLAEMAGLDRTSLKASWVAFQKTGEKLGAVFARNMG  
ADFGGQGIVFARQGADFAEHAANSAAPPPAAARPSGLPPAAGPAISGRIVSEPMLNKAGR  
IRYIVCTENGQLSTISAPQNDPTAIHAQASTLGGFFNLARGDLIEASGLEERGRSHFGIIP  
ASSLRIKMKAPRF\*

>SPBIB\_v1\_260013|ID:27163327|hndD| NADP-reducing hydrogenase subunit HndC [Uncultured spirochete bib]  
MVNVKVNIPVQVAEGSTVLEAAKKANVKIPTLCYNPDLSPWASCGICVVKIEGSNKMLR  
SCCTPVSEGMSIISNDPDLVQTRKTVIELILSTHPDDCLACPRNQACELQTLAQEFGIRE  
QPYKKMVRDIPQDTSTGSLILNPSKCIRCGRCVEVCQEMQGVWAVEFLGRGESIRIAPAA  
DVKLGDSPIKCGQCSAHCPVGAIIYENDQTKLVWDALMKEGPEAKTCAVQIAPAVRVALA  
ESFGLPPGTDLTGKIYTALRRLGFDAVFDTNFSADLTIMEEGTEFVHRLTGALKAGMQQA  
TADKSMPLITSCCPAWVDYMEKYYPDMIPNFSTAKSPQQMMGAMIKTYWAAKAKVDPAKI  
YSVSIMPCTAKKFENSRDESMYSSGYKDVDTLTTRELARMIKQAGIDFLNLPSEPDSP  
LGPYSGAGVIFGATGGVMEALRTAYFLVTKEELKDVNFTAVRGLSGIKEATVHINGIEL  
RVAAAHQMGNIATVLDQVRKAREEGRETPWHFIEVMACRGGCIGGGGQPYGATDEVKLR  
MRGIYDNDEKQEYRCSHDNPYIKQIYAFLQKPASHKAHELLHTQYKERPLYLK\*

>SPBIB\_v1\_260014|ID:27163328|hndC| NADP-reducing hydrogenase subunit HndC [Uncultured spirochete bib]  
MAYKNFILVCGGTACESSHSEEIYRNLIKEAEALGVSRDVQVVKTGCFGFCEKGPIVKVL  
PSESFYVEVKPEDAHEIIAEQVVKGREVTRLLYRKDKKSDTAKLEDIEFYQKQFRIVLRN  
CGVINPESIDEYIARDGYKALEKALFEMAPEEIIAEVKASGLRGRGGAGFPTGLKWEAAR  
KSPGDVKYIVCNADEGDPGAYMDRSTIEGDPHSILEAMVIAGRAVGANFGYIYIRAEYPL  
AIERLKAIAQAKEYGLLGKDLGSGDFDIEIRLGAGAFVCGEETALLQSIEGKRGMPR  
PKPPFPAVKGLWGKPTVINNVETLANIPVVLTRGAQWF AAIGTEKSKGTKVFALTGKINN  
SGLIEVPMGTTLREIIFDIGGGIKGGRKFKGVQTGGPSGGIIVEKDLDTPISESLTALG  
SMMGSGGMIVMSEDDCVVDVSKFYMAFCVDESCGKCAPCRIGTKQMYGLLDKISKQGEE  
ADLDKLEQIGRAMTKASLCMLGGSAAANPTLSTLRHFRAEYLEHIRDKKCRAGKCKDLVVY  
EIDPAKICIGCLCARRCPVPCITGEKKKPHVIDGSKCIKCGECYTACKFGAVIKR\*

>SPBIB\_v1\_260015|ID:27163329| NAD(P)-dependent iron-only hydrogenase iron-sulfur protein [Uncultured spirochete bib]  
MAKMTLEQLRAFREGKRQELEKRNVEGKDIQVIVGMGTCGIAAGAKLTFDAIVA ALEKHN  
MADKVVVRQTGCMGLCYVEPTVEVVMPGMPPVIYGKMTSDVAEELVVKHLVEHSLLDNHI  
FDRPAVDIVAH\*

>SPBIB\_v1\_260016|ID:27163330| Histidine kinase [Uncultured spirochete bib]  
MHYAIADFLDLVQNSVEAGAQSIEVDIDEAPDGLRVRIADDGCGMDEHEKARALDPFRS  
GGAKHPGRKVGLGLPFVQAVTLAGGWFSKSEKKGKTEVQFFFPGKSVDSPPLGDPVAL  
FTALLSMAEKSELKIRTRARDGLSYEVKKSSELAEAVGELASASSLSLVRQFLASQEEG\*

>SPBIB\_v1\_260017|ID:27163331|hndA| NADP-reducing hydrogenase subunit HndA [Uncultured spirochete bib]  
MVAGDIEFSTELQAYIDEWCKKEGGLVMMLHRIQHEFGYIPRAAAEKLSRISGIPLAKIY  
GVITFYHFFKTTKPGKHRIAVCMGTACYLKGGQDLLEETRSILSIEPDEVTDGGLFSIDE  
VRCLGCCGLAPVMMIDDEVHGLAKEQLPDIIAKYRAL\*

>SPBIB\_v1\_260018|ID:27163332| putative Tetratricopeptide TPR\_1 repeat-containing protein [Uncultured spirochete bib]  
MANSEKNKLIADLNNQAVSLIDAGRYQEAINLLDKALVLDPSRTGVLFNRAEAHRLAGNF  
DAARSDLLSELQMEPDSPEVLHALGLLAYEQDDFAQASEFYRKALDKDPLYASAWNDLGV  
VAFRSEKYDEARAAFEKATSLDPDFSDAWFNLADTYDELGLADKRAYALKKLHAARMRTG  
EKPDSEDRA\*

>SPBIB\_v1\_260019|ID:27163333| putative Protein kinase family protein [Uncultured spirochete bib]  
VNPGDIIIGTYVLDRLGKGVTA STWLAHLAQDTPSAAAGNERSENGAAENQPERISATHP  
ESPPNNAPTSPPVVLKIFDLAETSSWKPLDQFKREAEILRTLNHPRIPKYIESFDLAQGG  
HFEFVLMQYIEGETIESHVSSGKKFTEAHIEQMLAELADILAYIGSLRPPIVHRDINPR

NLILQPDGHVALVDFSGVQDAIRSALYPGATLVGTAGYIPVEQVSGRATHRSDLYGAAAT  
AVFMLTGRNPAELPMRNLKIDLSGLLYLSPGLAYVLGNWLDPDQDRRFLSAAKAAAILRG  
EEPVPPTAALASSPSNARSSENTRNIESLQSSRRALISHILSEPDTGRESVDYPAELPSDS  
RLEIQPLDPGLYIKLPRGKRAGSSSGFAFFPIVWLGFFVWTTMTLRMRAPMFFPLFSIP  
FWIAGVAMLKSFLKPSITDTELFITPDGLLKKSSSFISNSAQQY AISDVGTAKVQRSSVQ  
LNNRYLKELAEAGTGTTLTFGLGLSDRELYLEKRINEELEKLLKLPRE\*

>SPBIB\_v1\_260020|ID:27163334| Transcriptional regulator [Uncultured spirochete bib]  
MENPVQHTFFRYLTYSDEDEQWEMVCTDAGYTEVPPYTIYPPNKEGHPRIQFQVAVGRTL  
NEYQIIYITKGEVGFETSGRHYDVKPGSIIMVFPVGRHFYKPVYEIGWMEYWVGFKGGHF  
ELLRERGFLLNPQEPFIEIGLQNNVLDLYNEIIAEVRDQKPLYQIVASSKILALIAEINAC  
ARRRAQASHAAQVVEAAKMMVEKIYGDIDINSIATALGISASRLNDIFKTYTSMTPYQY  
YIHIKHAASKLLEQGDLVKEVAYRLGFEDQYHFSRLFKKKTGIAPSQWRAFMYE\*

>SPBIB\_v1\_260021|ID:27163335| conserved protein of unknown function [Uncultured spirochete bib]  
MHMHARNIYHKCKNIHCALGERPYTRWYMKENSAHIPTVGLFGIGLDTYWAQFPGLRERL  
LSYQAETAALLEGAGAMVVDAGLVDTVDKARAAGALFREKKVSLVFLYITTYALSQTVLP  
VAREAGAPMVIINVQPAKNIDYEFNSLGDALMTGEWLANCQSCCVPEIANVFNRNGIP  
YHIITGYRGEPPVEAELAQWVRAARVAEALRKTNIGILGHYYEGMLDVYTDVTRMAGVFG  
SQFNLIEMDYLAQLREKVSPAQIEAKIAQFRSEFEVSECEESELVRAARTSCALDALVE  
EKSLGALAYYYEGTAGNVHQDIVTSVIAGNTLLTAHHVPVAGECEVKNALAMKIMDLLDA  
GGSFSEFYLDYEDDVVLWGHGPAHSAIAEGKVKLVLPLLYHGKPGKGLSIQMSVRNGP  
VTLLSVVEGASGKVFLTAEGESVPGPTLQIGNTNSRYRFPLPARDFSEAWSKEGPAHHC  
AIGVGHVAAEIEKTAALFGIECHRIC\*

>SPBIB\_v1\_260022|ID:27163336| rbsA| fused D-ribose transporter subunits of ABC superfamily: ATP-binding components [Uncultured spirochete bib]

MAEYILELRHISKYFPGVQALKDVHFQLKPAEIHAIMGENGAGKSTLIKITGVYQPDEG  
EIYFNGERIHFKSPLDAQRLGIAAVYQHVACFPDLSVLENIFLGHESFDPVTRKIRWREL  
RKKAEILLQSLDADFSPSTTMGNLSIAQQQIVEIAKALSVDKILIMDEPTAPLSRRECE  
DLYHIVETLRDKGVSIIFISHRIEDMYRLAERVTVLRDGNVIATWDVPGLEQSRLVQGMV  
GREITQYFSPRHATIGEEIFRVEGLSRTGFFKNISFSVRRGEIVALTGLVGAGRTEICES  
IYGIAPRDSGRFFLEGKEITINTPAEALMQGIGYLPEDRMKQGLVLDWDLIRNITLASLR  
SFCKNGFMQPSKERDMALSLADNLKVKASNIYAKAATLSGGNQKLVAKLLTSKLLKII  
LDEPTKGVVDVGAKTEIYRIMNQLAEEGYGIIMISSEMPEVLGMSDRIVVIREGRKSAEFE  
TPNASQQAILESAMTANGREAHAIAG\*

>SPBIB\_v1\_260023|ID:27163337| Ribose transport system permease RbsC [Uncultured spirochete bib]

MQSQDKMQTGQNADGQTKAASRPDAIISRAESTSRAETLARNTETYRELGLAIFVILS  
VIFQIRNPKFLSLSNIKDMLANTAILSILTVGMMMVIITRGIDLSIGSTMALAGMITSLT  
VSANPSISPFLSLAQGMAVGLAAGLTIGVLVAYFNILPIIATLGLMNILRGMTYLISKGK  
WVSA YQMSAGFKNLSTGTTFGINNLIIFAIYIYIYAYFINQTKTGRYIYAVGSSPDTAE  
LIGIKRRRIILLVYALMGLLAGLAGVLWVSKFASAQGDVAVGYELNVIAATVLGGVSVAG  
GRGKVSIGILLGSILFGILANALPLINISPFWQQFIQGLVILAAIISNVLLQRRNDRLALK  
KRVJ\*

>SPBIB\_v1\_260024|ID:27163338| rbsC| ABC transporter periplasmic subunit [Uncultured spirochete bib]

MTEKTSTIDVNKPRGLRKYQWEIFLVVFLAVNVVNSFLSPYYLTLDTFVSTPMNFLDKA  
FLVLPMTMIILGNIDVSVGSIVALTSVLMAVSYNAGLPMPLAMVLALVISTTCGLINGL  
LQIKFRELSATIITLSTMTVYRGIAYVILEDRSAGRFPWSFSLAWGYIGKVPFILIVFV  
LAAIVFAILLHTTRFGRMVFAVGNNKTACEYSGIRTGRILGVSVITGLMAGFTSLFLTS  
RMGSTRPNVALGYELDVIAMTVLGGISTSGGKGRIAGPLISIFLIGFLNYGLGLRNVSAQ  
VLLIILGFLILSVLVQNFTDRPRQSSSKSGKSAAPTHRSDAGSGSDIHGNSAQGG\*

>SPBIB\_v1\_260025|ID:27163339| Sugar ABC transporter substrate-binding protein [Uncultured spirochete bib]

MKKTFTVVALVLIALALVMPASVFAAEKAKYAIVFKNTGNPYGEKQMEGFKNNGIEEQGFE  
AILRAPDLPTAEAQIQIEQLIAQKVA AICIVGNDYDALVPVLKKATAQGIKVFSLDSSV  
NPQARLTHVNQADSEKIGQTLIKAA YDMAGGKGEIAILSATSQASNQNIWIDFMKKELAK  
PEYKNLKLKVAYGDDLDRKSVSETEGLLRSYPNLKVIIAPTTVGIAAAGKVLTDKGLKG  
KVMLTGLGLPSEMAEYIENGVCYPMFLWNPIDVGYLGAYVGTALVSGKITGKVGDKFSAG

RLGNYTITKAPDGGTEVLLGPPFKFDKSNINDWKKVY\*

>SPBIB\_v1\_260026|ID:27163340|yiiL| L-rhamnose mutarotase [Uncultured spirochete bib]  
MKRNAFAMQLKPGNEAEYKRRHDQIWPELKAELRKAGVSDYSIYLDPETMRLFAIQLAD  
DETSSTLPESPIVRKWWDSMKDLMETNPDNSPKVWPLTEMFHMD\*

>SPBIB\_v1\_260027|ID:27163341| putative bifunctional rhamnulose-1-phosphate aldolase/alcohol dehydrogenase  
[Uncultured spirochete bib]

MNLETLIEISRRYGADPDYVLAGGGNTSLKDGDVIAVKASGALLGTIDENGFVQLSLSKL  
RALFDMALPSDSEAREKIVLEKLLLEARLPGQTRRPSVETLLHALFPYRFVIHLHPALVNG  
MLCSRQALSAAETLFRNEASVLPYITPGYILADAVRRVFEHRTSSGMSPPKILFLQNHGV  
FVAEDSVEEIEALYAHIFETLKAKVQPLPEEGLRGGPARGYEAIAA VA EKAVETAATKF  
NVRFFFTSNSLIGHFLASPEAFVPLSSPFTPDHIVYAGAWPLFVNISEAQSSHEHLISKID  
EYRIRYQEMPKIIAIQNLGIFGLGQDESAAKRACELFGDAAKIAWYARISFGSVHPMQPAD  
IEFIRSWEVEKYRASIAASSNPAS\*

>SPBIB\_v1\_260028|ID:27163342|rhaA| L-rhamnose isomerase [Uncultured spirochete bib]  
MSRIEQEYKSARETYADLGVDTDQAIKTLSSIPLSIHCWQGDDVIGFDGATSLSGGILAT  
GSYPGRARNAEELRADAFAFAHIPGQKRFLNHAMYAETGGTKVERSALQPRHFDWVAV  
AKEQKIGLDFNPTFFSHPLAASGWTLAHPDENIRKYWIEHGKASRRIAQAIADSLKDVVV  
NNLWVPDGSKDMPADRLGPRRLKESLDAIYAEKLPNDRVLD A VESKLF GIGSESYVPGS  
HEFYFGYASQKAIGLCYDMGHFHPNESVADKISATLLYVPYLIHLSRGLHWDSDHIVW  
NDAITDVCREIIRM RVWDRIHLALDYFDSSVNRISAWIIGARSAQRALLYALLEPVEAMR  
TEEERGDGFSRLALIEESRSLPFAAVWRHYCEMQNPAGPEWIEDVKDYEEKVLEERG\*

>SPBIB\_v1\_260029|ID:27163343| conserved protein of unknown function [Uncultured spirochete bib]  
MAVISIRLNEEEEKMLAFLEKQFAKDKSSLIK YSLNELYENYIDNKLIEEFEAKEKETGP  
KFLGAKEILADI\*

>SPBIB\_v1\_260030|ID:27163344| conserved membrane protein of unknown function [Uncultured spirochete bib]  
MTEFVNNIWRWVSDLPALGAPLILLVGWAIKILKLIMPKILAVLKFDVLAGKIGVNEF  
LRKGVH VQYAPSKLIGVFLYWVVMMLVLAMAASVLDQRAAESIWSWLF GA IPTILAAGITA  
AIGVLIVNFLSNFVLTIMNNA GMGSATLVQRLIRAVGYIIVVVMVVDQLGLGQSIVSILL  
LLIGSIALGIAAIGLGCKDMARQYVESLIRAIRERERASHGTDLEG\*

>SPBIB\_v1\_260031|ID:27163345| putative opine dehydrogenase [Uncultured spirochete bib]  
VKKTDWSGILEHLERVA AKGKDMVWCIA GAGNGGISMAGHLGLLGFPVQIYNRTDEHLNA  
IRWYKGIEVEGAVSGFGPVRLATSRIGEAIAGTDVIMIVTPSTAHYGLGTLMAPFLEDGQ  
IVVLNPGRTGGALEFRAALDREGCTARVVIVEAQTFIYASRMISRNGKHIFRIKNGVPVS  
ALPSFLTPAVLKVIDVAFPQFIAGSNVLATSLLENIGAVFHPALTLNAAWIESTGGDFEY  
YLQGISPSVARVLQAIDDERLALARALGIRTVSAREWLYLTYDSVGADLCSAIRATISYA  
GIKAPKTINHRYIWEDVPM SLVPMASIAAMYGVETPAINLTIDLANLMHGV D YRANGRTV  
HTLGIEGLSVEELHRLVTEG\*

>SPBIB\_v1\_260032|ID:27163346| Cobalamin B12-binding domain protein [Uncultured spirochete bib]  
MYKVSQNDVIGLIKPAIDAHTLGILAFQAQLRDCGIRVEIADEDASKELDALVGRPSIER  
LVRWVRAKGIDVLGFSYRLDPDRGVELFAQLVEHLKS AKMLAKDGGPIKALWFAGLPPAC  
KKAKQRVPFVDAVFHGDETYQEILEILGLPAHLVPQQASAELAYDKARLEFGTEIVKNRA  
YLDVAPVDRSGSPGFGTWGERVIDRVRHGIAHNLPPLMRAHVGPYAEDRSQAV ALFLDWT  
SRLAKSGLLDVLSIGSSQLTQSHFGEDWTGLSNGGGVPINSPEEYRRVWQAARPMLVRTY  
AGTKRVPDMAKMHEQSLDICWHALSLWWFSKLDGRGDNSVLENLVEHFEALRHIASSGKP  
MEPNVPHHFAFRGCDDVGYIVSGYVA AKA AKLQGIRTLILQTMLNTPKYTWGIQDLAKAR  
ALRMLVRDLEGPDFAVILQPRGGLDYFSPDMEKARAQLAAVTMLMDDIEPDDPASPQIIH  
VVSYSEGVRLADPDVVQESVRITRYALSEYRRLKRKGMPEY GKHS MVEARTRHLYEEAR  
RMIKFIEATIPEPYSRGLYAMMKAGVFPLP WLSACRDEFDAAVSQPVQFMHGGVQTVDK  
DGKPLAVSQR LFGIARNLERMGFAPQEEHGEKN\*

>SPBIB\_v1\_260033|ID:27163347| putative D-alanine--D-alanine ligase [Uncultured spirochete bib]  
MRLQIIMKKKTDRKIA VENEVRYARMTGIYNGAGFEAYFSYAANINDLETIIRENLPLDV  
LCGIDHLPEEKDGITVSTNVHGW FESHNVLYIGSDPEVIERALS KASLKRKWEADGIRTP  
PFVHVEAGEAGLKEGIQKLVLD AFPIIKPENLGN SKGIDENSI A WNVDEL SRVLARMI  
SLYSGHILVEHYLGAYPDVKEITCAMIQGQGAMQCMPAFLGLAQPKRFHLITSDDKDGH

TVMSPLEPEQMERFVPFAQSAFESAGVRDYARGDFFADGKFWAIEINGQPMIPDRWFEE  
AAGFDGISEAQYL VGIVAAGYRRLRAQGKLTSAFPAGARALLERTRLAEDLSAETPHKGG  
LQDV\*

>SPBIB\_v1\_260034|ID:27163348| protein of unknown function [Uncultured spirochete bib]  
VHHEIALVFALIAGDHCFAINYSTKSRLAFFKTKFVIIADMWYILK\*

>SPBIB\_v1\_260035|ID:27163349|pcm| Protein-L-isoaspartate O-methyltransferase [Uncultured spirochete bib]  
MITCNERKDERNFMVHTQIAARGVRDKRVLDAAMRKVPRHRFVPVSCSSEA YEDFPLPIGS  
GQTISQPYIVAFMAEMLRLNGSERVLEIGTGSGYGTA VLSLLAKEVFSVERIAALLERAR  
EVLEALKVENVHLRLADGFFGWAEAPFETIILSAAPFDIPNAIVNQLADGGRLVAPVGS  
LGAQTLVRITRRGAHFDTEALLDVAFVPMRPGVSEL\*

>SPBIB\_v1\_260036|ID:27163350| conserved protein of unknown function [Uncultured spirochete bib]  
VWTVSATDEYIEWFCSLPGKAQEALLAKVLLLEEFQPQLGRPHADTLKGSRIKLNKELRA  
RTHAQVLRVLYYFDEERQGLLLIGGDKKGRNEKDFYSRLIQMAEEIERYR\*

>SPBIB\_v1\_260037|ID:27163351| conserved protein of unknown function [Uncultured spirochete bib]  
MAIKNAIEAMEAVMTPEQVSRARAAAEREMLAIRLAELRERKGRIRQSDMKAFSQTISK  
IERRKDMKLSTLIDYLEGIGMGLEIRVYPKNAKGSKSHKSQTILKV\*

>SPBIB\_v1\_260038|ID:27163352|mtaD| 5-methylthioadenosine/S-adenosylhomocysteine deaminase [Uncultured  
spirochete bib]

MALLIRHALVEGAESDILIQGERIARVVPEDSIPLDGSDEIEVIEARGMAAIPSLVNAHA  
HSAMTLLRGIAEDMDLMPWLNEAIWPREARLTAEDVYWGTRLA AIE MIRAGTTLAADMYF  
FPEAQAQAARDSGMRVFISFPLIDGLDEARGLAQQKACDEFFKRLPDCGPASIFALAGHS  
VYATSASSWRYIARFAKEHGLFIHIHLAETETEDRECRKTGMSPTAYLDSLGLVLPNTF  
AAHCLWLDARDWDLAQRGVTAVHNPVSNMKLASGPAFDYEAARRRGVRVLLGTDGAASN  
NSLNLFSMDK MAGLLQKH HYKDPKRWPVREILAAASRN GHEFFGTGGGRIETDASADLVL  
IDLARAEMTPCHDLASNLVYANAGAAVDTTICAGRVLMLHGVIEGEKEVREEAARRAQAL  
K\*

>SPBIB\_v1\_260039|ID:27163353|punA| Purine nucleoside phosphorylase 1 [Uncultured spirochete bib]  
MHSFEEIQAAAALLRERLGEAPACALVLGSGLGGADELERPVALSYKEIAGFPLSTAPG  
HAGRFVAGYVEGVKVLAMQGRFHCYEGWDASQIAFPVRVLRAYGVKVL LLTNAAGGVNTD  
FRPGDFMLIRDHINLSGRNPLVGANDERIGPRFPDMSKAYDPALRELAKGAARDLEIGHL  
EGVYAWFLGPSFETPAEIRMARTLGADAVGMSTVPEVIAAVHCGMRVLGISCITNLAAGI  
LDQPISGDEVLEISAKKRPEFSALVKAIIRIGAEDAALAGMPRGAAWRS\*

>SPBIB\_v1\_260040|ID:27163354| conserved exported protein of unknown function [Uncultured spirochete bib]  
MHNMKIVPIGTTFFVVLVLLCAGCGRNPAGSGDLPQVNTNTAFDLQGFNICA WGKNWWSDA  
ALVDKALKFALEEGANFLALDWPVNFNDGTMVAFEHSLHPHWNDMQR LIEKAKQMGFYI  
MLKPHTTKAESAE NRNIWNTDTAIFLPGTFFSAYKGYLEELADFATQNNVDAICIGTEMN  
HLDTGFRDQWSELVA AVRARFAGLV TYDAFFNRWCCSVPDIGEVC FWDLVDMIGVSLYVP  
VTRNDDASVEEIRRGWFESIEPEFEISDVIA YLKGIAQDADKPLMALEGGYQSVSGGLYD  
MTGPSTHKT VNYDLQSRGLDAYLRVLS ENKDSWFKGVSLWQLTPSMLSSNNLQTIWHTQE  
FTVYQKPAAEIVKQHFFK\*

>SPBIB\_v1\_260041|ID:27163355| protein of unknown function [Uncultured spirochete bib]  
MNSLRWLPTEKKIYAKIFINAAGVYGDVISRKAGIDAYTITARKGEYILLEPNEKYNVHH  
IIFPSPTKTSKGII VTKTITGYILLGPN AVDMPETEKSNNYTTREGLKEVLKKQKSLCQH  
YRRNWRSRHLPDCVLSRIPMTLFWKTMLYQLTSLRLAQDFGVRNQLYNFTCYADLELGV  
DLGASWQNQLIQWIKGKGLGTS DILYRHSGSWQV\*

>SPBIB\_v1\_260042|ID:27163356| N-acetylglucosamine-6-phosphate deacetylase (fragment) [Uncultured spirochete  
bib]

MRHLAAGGTTQHLATIVTRPHEHMVRNLKAIVRARQESALLRFAIHGAHLEGPWISLEDG  
PRGAHDPRYIRKPDFEEFQKLQDAAQGLIKKAPRLRFSQRS\*

>SPBIB\_v1\_260043|ID:27163357| protein of unknown function [Uncultured spirochete bib]  
MSIRQILKSRMIVCTVPDARKQDAVYMALNAPRRWRNNTASCNNCHSPS\*

>SPBIB\_v1\_260044|ID:27163358|glbB| Ferredoxin-dependent glutamate synthase 1 [Uncultured spirochete bib]  
MQQRKKEMHNYRIGILGLSSGAPGPGASSIKRANIIKQQLLEPSRGAYSTLSPNPSGLYL  
PEHEHDACGLGIVVDLKKKSSHSVISDAL TILQNLEHRGAVGGDKKTGDGAGILCQIPDR

FFRREMAINDDMPYGIGMFFLPASHNAFVSAKLVSNIAAERGFGLISWRDVPILPQVLGE  
RANKTMPRISQAAFVQLNPPAIVESEDDARTRASLRSPSDDFERSLFILRKYIEQEAKRA  
GFSFEFYIPSLSSRIIVYKGMFVASQFANFYDPLRDPLFESQFAIVHQRYSTNTLPSWP  
LAQPFHMAIHNGEINTLRKNNSMKARQATMASPLLGAFFKDIADVLEAGSDSAIFDNI  
FELLVHAGRSPEQVFAMMVQEPFGEGLRISHDKRAYYDFHAAMLETWDGPAAMSFTDGRV  
VGAALDRNGLRPFYSLTKSGYFIGASEAGVLDLDES DIVERGILRPGEMVLVDLENGRL  
INDAEIKTRISRQKPYRRWLETNRIELRGLFSAPDVRPSSAELAHLISYFQYDNETMNIL  
KPMMLLQKQEA VSAMGTRKPPAILSRTVPVPL YAYFRQRFAQVTNPAIDPYRESAVMSLENY  
IGTQKNLLEETPEHCKQLKLQRPILSNSDMEKLNKSRVPGFSSATVSMLTPAARIRLEEE  
LDRMCREAEHHIDQGANLILSDRGLDEQHA AIPALLAAA VHTYL VDAKKRHLAGLVVE  
TGEVRDVHEIAVLLAYGASGVNPMVMVFELLPSISDQLEERPSAEMMLADHYIEAVNKGILK  
IMSKLGIATVSSYRGRSMFEAVGLSEGLVKRYFRGTESRFGGIGLKEIADDMLSRHRAAF  
GSEQESAILPDRTGHQPVNEPRQAAGGAANQATDQAADQATDQVANQTVRQTAVPWPPSL  
AAKLTAKAVREGDAAAWRAYADGMDSAARPPFALRDLFSFKSGSPLTSSSPLPLDQVQPAE  
EIIKRFSVAAMSLGAI SPEAHETLAAGANAIGSWSNSGEGGEDSERHTYKDKGLDSQNAS  
KQIASGRFGVTARYLATGLELQIKIAQGA KPGEGGQLPGAKVNEYIAKLRHSPKPGVTLIS  
PPPHDIYSIEDLSQLIHDLCINPSARIAVKLAAQAGVGTVAAGVAKAGADCIIIVSSGD  
GGTGAAPLSSLDYAGSYWEAALPEILQVLAMNSLDLNTVIQVDGRLRTARDVVI AAILGA  
REFAFGTAALIAMGCIACGRCHLGKCPVGIATQEPEFRAKFKGRPEHLIAFFKFLAEDVR  
KILASLGAKTIDEVIGKYELLD FSGRASTAREKMLDFDHIKEALEIARRYPLVEGQDLAS  
DTTPAIPLEAGLRNFRPEKRQDFSIDAEAA LLQKCARLLQERASTSRLEFSLPIRNSD  
RSVGAALSGEIRAGLKLEPDTVSVTFRGTAGQSFGAFLAQGVLFRLFGEANDYLGKGLS  
GGRIIVRPRRESRCQPEHNVIAGNVCLYGATAGEVFLNGKVGERFCVRNSGALAVAEGTG  
NHACEYMTEGIVVILGKTGINFGAGMTGGVAYVFDEDQLFDTRCNLSDVDIAAVTSAEDI  
DQLRTIHERHQNLTGSPRAKMLSEWDSYLPFLKVVPR\*

>SPBIB\_v1\_260045|ID:27163359| putative amidase [Uncultured spirochete bib]

MNRKRLSRRCGGLEPGIPDTCEEYTLRDFQREFGAGRLSSAQLVDY YLGRIAVLDCPGA  
GSDCEGQALRSLLYLNPEARSIAEERDRERRAGIVRGPLHGIPVVLKANINTADQMPTTA  
GSQALHGFLAPEDAPLVAKLREAGAVILGKANLSEWANFRSTHSSSGWSSEGGQTKNPYV  
LERNPSGSSSGSAVAVSANLCA LSVGTETDGSII SPASINGIAGIKPTGGLVSAEGIPI  
SFTQDTAGPMARTLEDAIVLLEAMSGRDYSGVLGGNLAARPLEGMRLGYAEKLSRFLPQV  
EDIMKKSIAALENLGAEIVPVDIEPDEEVQKAEYQVLLYEFKYGIEQYLARYVAARADSA  
STPWPRTLRDIIAFNTAHADTAMPHFAQEILIEAAGKGSLEEPEYKNALALCRAFEKEKG  
ISAFTAKYRLDAIVAASNSPAWKTDHVLGDHYVGGNTSLAAIAAAPHITVPAGFVGELPI  
GLSVFGVPHSEEVLFRIGLAFERAVKARKAPCYKGV\*

>SPBIB\_v1\_260046|ID:27163360| Transcriptional regulator, RpiR family [Uncultured spirochete bib]

MILGKIKETLPRMSPNFRKIASFILDNDNNVAFTSIYSLSEALDISTATLVRFAKSLGYK  
GYQSFKKDLQEEIQHRLQPYDKVSLSKLGTLP EEKRLQKLIQNEYNNLRSTLNNLQKDF  
ETMIGAVQSARRIFAGFGITRHF AQILQTTFLASQKDV FVITGSVSDYSPQLKSFGAS  
DIMFLMTFPPYSAEVKHVASVAKERGGFLCLFTDSASCPVYSKADVVIKCTTNSLLMSNS  
FVGLVSVIHVFIHMLLLSSENGGKNIRNGLEMEKMGYSIIADAGEQSCS\*

>SPBIB\_v1\_260047|ID:27163361|iadA| Isoaspartyl dipeptidase [Uncultured spirochete bib]

MLVIQNAEVFSPAPLGKLDILVGGAKILAMEPHIDPAVLPGETEVLDARGMMLVPGFIDG  
HQHFTGGGGEGGFQTRVPELTISMNFSNGVTTAVGLLGTDSLTRSIENLYAKTQAFNAEG  
MTAFMLTGAYWHPSPTLTG SVARDMVFLQP VIGVKLALADSRGPHIDAKDLAALASDVQV  
AALVANKPGIITVHTGIRTQGLDLIFEIVEQFEIRASIFVPTHINRKGKGLTSQALALAE  
KGCVV DATCSQAPLEPDSRLTAADFACMARDNLLGQVSFSSDAGGSMPIWNQDRSRII  
GMGVGMPSLLFELDLLVNKKGVPLEQALMPLTTTPARIYGLENSKGALRVGMDADLLTI  
DPASFEIRDVVALGSVA VRNKIVEKKGYFEHGS DTSIHA\*

>SPBIB\_v1\_260048|ID:27163362|yliA| putative peptide transport fused subunits of ABC superfamily: ATP-binding components [Uncultured spirochete bib]

MAVTHPFMHEDEILT IKDLSL SFPGYHGYTQVLHNVSFSVKKGETLAIVGESGSGKVTM  
RRVMQLLANVRTDSGRILLRKR DGTVLDITNISHKD ATKIRGADLSMIFQEPMTSLNPVF  
TIGDQLLEAVLIHQ RISK AQAMQKVMELLE LVRIPDKARRVNDYPFQLSGGMRQRVMIAM

ALACNPQVLIADDEPTTALDVTIQAQILALIQLSLQEKLHISVVFITHDMGVVVAEIAADRVVV  
MYQGQVVEENDVHSVFSSPSHPYTQALLKAVPKLGSMTGRPFATLPILEMSKELSRKPG  
DAAPQEKTIDTADYTKPPLLQVRNLTHFIADKTFFGRTTHVVRAVQDVNFDLFEGETLG  
VVGESGCGKSTTGYSILKLVPAQGKVLFMGSDILTLPDSELKHYRRDIQVFQDPYASLN  
PRIRIGTAIEEPLVIHNIGTPEERKKRVEYLLDCVGIPRKHKDRYPHEFGGQRORIAIA  
RALATQPKIIADEAVSSLDVSIQATVNLMLLELQKEFKLSYLFISHNMAVIERVSNRVM  
VMYLGHVVESGTRMQVFENPMHPYTRKLLAIPVPDPTRRSNFGMLSGEIPSTIHRIEDA  
TPRIEYIEVEPGHFVASTKEGISFGA\*

>SPBIB\_v1\_260049|ID:27163363|dppA| DppA2 [Uncultured spirochete bib]  
MKAKHLVLALMMVLIISAIPLFAAGKDIIYASDSTTKTLDPHDTSPTYSGAIERAICQGL  
LGFDKNLNIPLLAESYTYNDSATEFTFKLRKGITFDGAPFNAQAVKVNIDRLMTGKYV  
RSSLMAPVKEVKIIDDYTVKFILKEPFGAFLNALAHPGALMLSPKALQEYGGDDVSKHPVG  
TGPFMFSEMVSYSYVLIKKNPNYWRGTVKVDSEKIFVPIPENGSRVAMLRAGQAQYIYMP  
AELLKLVENDPNIDVIKQPSIERYLILNTKSKPLSDERVRQAINYALDKKAIINIAWGG  
AATEADSIFPSALPFFKKQGPWPYDLAKAKALMKEAGYENGFKVVFLTPNASARLRATEM  
VQQQLKAIGITGDIQSM DVASFYDKLAKNKLETVGETPFIAFGGWSSTGDADWATRPLI  
STEAFFPNMSNYGFFEDKTVDNLIKAGLTTADPKVRANAYAQLQDYVWSKAPWGYLFDVT  
LIAAKSKNIKGIYPMADGAFTVEEAEIVQ\*

>SPBIB\_v1\_260050|ID:27163364|yliC| putative peptide transporter permease subunit: membrane component of ABC superfamily [Uncultured spirochete bib]  
MLKYFIRRCLSILPULLVVSILVFLFVHLLPGD PARIMAGPDADEATINRVRTELGLDKS  
LPEQYLN YMGR LFRGDLGKSLRSLKLPVAQEIALRFPPTLYLALASMVWSILFGVLF GAYA  
AMHRGKWQDYTAMLVAVSGISMPQFWLGLLLMQLFAVHLGWLPVTGFTGKFKEILPLSLT  
LGATVA AIIARFTLSSFLDVLQEEYINTARAKGLSERVVMWKHAFRNALIPVVTMVGLQF  
GFLGGSVVVETVFAWPGLGRFMIESVSVRDYPVLQALLLLYSFQFVVINLLIDMLYAVI  
NPEIRYK\*

>SPBIB\_v1\_260051|ID:27163365|yliD| putative peptide transporter permease subunit: membrane component of ABC superfamily [Uncultured spirochete bib]  
MAEKTITPFMIFWQKFKKQKSAMVAGIFIFLLILAAIFAPFIAPYDPYAIDYGNAMMPPS  
PQHWAGTDIYGRDILSRIIYGARISLTVGISSVTIGAI VGVSLGLISGFFGGFLDEIIMR  
SADVLFAFP GILLAI AVVAILG PGLVNVVA AVAIFS IPTFARIVRSNTLSL KESLYVRAA  
RSMGASNK RIMFVHIMPGT LSGAIVYFTMRIGTSILTASSLSFLGLGAQPPTPEWGAMLA  
ESRDYIGVADHLTIFPGIAIFLTVLAFNIFGDGLRAAFDPKLR\*

>SPBIB\_v1\_260052|ID:27163366| exported protein of unknown function [Uncultured spirochete bib]  
MKRILPIAAIFLLFALIPVIAQTEAELKATYENAVKLAAAAPQDYTLNWQAARAARKYGD  
YLVKNEVPGWKDTARAAAKEGMKYGEIAFKLNPTGIEGWYWGGLCVGTYSDCVSVLKALA  
EGLKGGKTQMGFENAYKFDKTYDNGGPILSLGRFWQVLPGIAGQDRKKAQELFNEYIQLFG  
SSPDANS DVWYFRGQLYKDTNRAALAKADLEKAAAMGNKDAQKLLGEMK\*

>SPBIB\_v1\_260053|ID:27163367| protein of unknown function [Uncultured spirochete bib]  
MKKIELVP IESMSVDFQS YGVCVSVDNRPDYDSPEFKFWNKLGIIESQNKCSICMVESY  
PQKQSLSTVFECHTRTGETLIPVENDVLLVLGLSKNSQHNEMDYDSVKAFLVRKGTAVIL  
NPGTWHYAPIAQHEVVHTFVVFHDHATPDSVVIKIDSQDAGVGWEIAN\*

>SPBIB\_v1\_260054|ID:27163368| putative 2-hydroxy-3-oxopropionate reductase [Uncultured spirochete bib]  
MNIAVIGTGIMGTGIGLTLSSKGH TVHCYNRTRENAQELIAAGGKYFSSPAEAAKDAEYI  
IIFVWNKEALYNVLNGESGLVMGARQGGQIYIDMSTQLPETAKEEVKMFKAKGADFIDAPV  
HGSKAEARNGLWIMAGADSQVFAKALPLLKEIGETVHYMGPVVGSGCVAKLCGNHLVSAI  
VASLGESLVM AKKSGINSEELLKLWSEVDFRSPIDGVGHSMINHEFDVSFHLRTMVKDT  
ELIRNYESIGVPVLISNIVHELNVGQNMGWGEQNASAIVKVFEKFAGVE\*

>SPBIB\_v1\_260055|ID:27163369| Dak phosphatase [Uncultured spirochete bib]  
MEALLREHLEPLFFSIKESFERNKEFLIDLDSKTGDGDLGLTMSKAFSAAHESVKASNSS  
NLGQILAMAGIAISRAAPSTMGTLMATGFMRRGGKAIENAQRIGTKEMADFWLAFSKGIAD  
RGKATEGDKTILDVAAPVAKSFSASAEKNESLAVAMRYALDAAGKALEATKSMIAQHGKA  
AVFREKTIGLQDAGGSALYILVKTMHDFVLA\*

>SPBIB\_v1\_260056|ID:27163370|dhaK| PTS-dependent dihydroxyacetone kinase, dihydroxyacetone-binding subunit



DhaK [Uncultured spirochete bib]

MKKFINKPENFVDEMLKGIYASHPQQVMFVANDLRCYVRKEAVKGGKVGIVTGGGSGHLPL  
FLGYVGEMLDGCavggvfQSPSSEQILEVTKAVEQAGVLYLYGNYTGDILNFDMAAEM  
ADIEGIKTATVVGNDDDVASAIKGEENKRRGVAGIFFLYKAAGAAAEGMSLEEVKRVAEK  
AKANVRTMGVAFTPCIVPEVGKPSFTIGDDEMEIGMGIHGEPGIRRGKLLPADKIVDEM  
YPIIKDLPFEKNNEVAVLINGLGATPKEELYILARRTLHILEEEGLKVFHVYVGEFATSM  
EMAGASISLCKLDEELKRLIAAPAFTPFSSQKQL\*

>SPBIB\_v1\_260057|ID:27163371| Sugar ABC transporter, membrane spanning protein (Sugar) [Uncultured spirochete bib]

MDGKLLSGKRRYMAADRSLQLLLIAIVVFIIMALLNPGKFLTLLNIESMAYQFPELGII  
SLGMMIAMLSGGIDLSIVSIANMASILMGLILTKMMPQNAANNQIVLFVAFALLISLLTG  
LISGLINGFLIAHVGIPIALATLGTSQILTGIAIVITKGYAVPGFPEIFLKIGNSKLFIF  
PIPFLVFLACAIVLFFLLQKSSFGIRLYLIGTNIKASVFSGIKVKSIKMSYALTGVLAS  
IAGIVMTARTNSAKADYGSSYVLQAVLVAVLGGVNPAGGFGSVIGLSIAVLSLQFLSSGF  
NMLRFSNFATEFTWGMFLLIMGINYFQNKRIKSSK\*

>SPBIB\_v1\_260058|ID:27163372| putative ABC transporter permease protein [Uncultured spirochete bib]

MKKLLQQHEFVVTVFFLVVILIGAINPAFFSIGNIFSLKSMIIRGILALGVLIVIIISG  
NVDISFTAISAFAMYTTSKIMLALFPEGGLLLAFAIGGLIGLLLSINASFVAGMKLPAL  
IVSLGTSSAIRGFMLAFIVKIIINLPASLIAYSRSYIAKFTDASGKIVTLPSAIIMLIA  
VTIIVWFILRYTMLGRGVYALGGDPVSTERAGFNIKAIQYFIYCFMGFLSGIAGVLHSVF  
MRNANPFDIVGTELIVIASVVLGGASITGGKGTVYGTLLGVAFTVLIENSLIIIGVPSYW  
QKVVIIGLIIVVSTAASALREKFAKLEIS\*

>SPBIB\_v1\_260059|ID:27163373| putative ribose/galactose/methyl galactoside import ATP-binding protein [Uncultured spirochete bib]

MEQVFLAVENIDKSFAGVHALNDVSLKIKKGEIHCLAGENGSGKSTLIKVIAGVEKPD  
QIIIDNKKYHHLHPIDAIHEGIQVIYQDFSLFPNLTVAENLALNSQLEMRRKLVSWKQVK  
ETAEKALQLINVDLNLVENLPVADKQLVAISRALMQDAKL VIMDEPTTALTQKEVER  
LFKIIKSMQEKISTLFFVSHKLREVLDISERLTILRNGQKVIEGNVEEFDETKITYYMTG  
RNVSSNKFISEKSGDEKPIVSVTNLSSDGFDDINFDLYKGEVLGITGLLGSGRTELAL  
ALFGYSPADKGEIHINGQKIHKSIQDAMRNGIAYVPEDRLNEGLFMKQSI SRNIYV  
DSIKKALGLINVSEADSIASLIKDLNINADDPLRPVQTLSSGNQQRVVLARWLSTKAKL  
IILNGPTVGVDIGSKTDILEKLELAKEGLGIMIISDDIPELVQTC SRILVMHKGKIIRT  
LEGDEIEEK AISNILNLD\*

>SPBIB\_v1\_260060|ID:27163374| ABC sugar transporter, periplasmic ligand binding protein [Uncultured spirochete bib]

MKRRILLGMLLAMMVVGLVSAQTATTASKKFTIATVVKVDGIAWFDRMREGVVKFGKDTG  
NTTFLLGPAKADAAEQVKIIEGLIAQKVDAICVVPFSPEALEPVLLKARDAGIIVISHEA  
TNQQNIDYDIEAFVNEEYGAHMMDNLA KFMNYEGEYANFVGSLSKSHNQWMDGAEARQK  
EKYPKMKLVSRNNEYDDQNIAYQKTKELLTKYPNLKGILGSASTTAPGAGLAVEEAGLQ  
NKVSVVGTSLVSSSGQYLKSGAVKMIFFWDPADAGYVMNKMAL TLLTGKIDG MNLGVK  
GYEKIKRDPQNPKV FYGQAWVDVTPANMNQYNF\*

>SPBIB\_v1\_260061|ID:27163375| Regulatory protein LacI [Uncultured spirochete bib]

MAGTLQDIADAAGVSIATVSLVLNGKEGISAETRQKVMQAAEALNYRPKKHQSLMSANSR  
NTIQFLKIAMHGHTVNRDHNVFISDYIDGMFREAQRQGYKLEIANIKGESIDYIIDLIS  
RKPEGAILLGTFSQNDVIALKSIDFCPIVLDYFDYLDLNFVDMNNSDAVYKII EYL  
SCGFRKIGFINSNVQTRNFYLRKQAFIGSMQVLGQKVDENYIVDVDSTFN GAYKDMMVHL  
SRGIKLPECYFCANDIMSYGCIKAFKENGIRIPEDLSIVGFDNLPMSASMDPPLTTIDVS  
KQKMGHFAVTLLELIQSPERKNSVKILVGSDLIRKSVAPKI\*

>SPBIB\_v1\_260062|ID:27163376| Xylose isomerase [Uncultured spirochete bib]

MPRYSVILGNLGNLTCDRFLSTGYKNQPSKEIMIRQASEIEGVEGIELVGSWDIDEHNADQ  
IGDLLGKYNLSCVSIIPDLFSQKKWGTGSIASKDPDIRAQAMDYLF SICEISRKIGCSLI  
NIWPGQDGYDYCLQANYLAERQIIENIKKLAFYFPLRFSLEYK LKEPRTHSFLARASD  
TLLVAMATELPNVGV TIDTGHALFAYENMAESA VMLDMSGK KLFHLHFNDNYRYWDDDMI  
VGSVHLVEYVELLYWLKKIDYNGWYSMDQYPYREDGKHAIEESVKFIQAIERKLTPSAMK

EIDNLLAEGKAVESQKWREFIFS\*

>SPBIB\_v1\_260063|ID:27163377| D-tagatose 3-epimerase [Uncultured spirochete bib]  
MRKIGIYYAFWTREWDVDFPFIQKVKSLGFDQLEINGGTFAEMSAAEQKRLVDEAKRCG  
IVLSYGIGLTANHDVSSLDESVRQSGVRFMQQMIEAVGEAGGGMIGGTVHSAWPSTLPEG  
TTNKRPLYEQSKKSMRELKVAEDNGVILNVEVINRFEQYLLNTCEEALAYVEDIQSPAC  
RILLDTFHMNIEEDSIGGAIRKAGRHLAALHLGETNRKPPGLGRMPWKEIREPLDSIHFD  
GPLVMEPFITKGGQVGRDIAIWRDLIPNPDYDRLARDAAAFVVRKTLCE\*

>SPBIB\_v1\_260064|ID:27163378| putative Carbohydrate kinase, FGGY [Uncultured spirochete bib]  
MSQTCAPLHIGIDLGTGSLKLSAYAGERAFSASCGYDIFSPEPGIAETDPEAWIAALKTA  
WLAVCAQLQNAGLPIELASIGLSAQMHGFVPISETGAALHNAILWADLRGAAYAGLYSSL  
LAGSFDRLMNAPAAGLTALILLWMKHHEPELYAKTHYILFPKDYLRFRLTGDIATDPGDA  
SASLLYDFRTCWAEDAIEALGMDHSLKPVIRDSFSPGGVVTGKASRETGLPEGVLVATG  
SADKACEIYGSFFGEYFRELALAGSPDMGIMSRQAPARGKFLNSAPLRGTGMNSALSRE  
DMHSAPFRGHDSWQSPKAAQVSIGTGIQVVIPVRGLAPYEPGLNFFESCVPVRYRMAA  
MLNGGLALEWVLSMLNADWESLYRAMDEGKTRLPQDLLFLPYLTGERSPYQNPARGAWI  
GLGLHHTRNDLLSAALLGVACTIRLGMESLGVAPDASVYCVGGSTRFKTWMNIVSEVTGR  
ALFVTDQPDASVRGAAAIGRAAAETGAFDARRLPAPLETTRIEAESPAWIEHYYSRKFSS  
YEALFGGHE\*

>SPBIB\_v1\_260065|ID:27163379| NAD-dependent epimerase/dehydratase [Uncultured spirochete bib]  
MKVLFIGGTGNISSACTDEALGRGYEVFHLNRGTHPEREKPGVRTLKADIRDTQAVKAAL  
RGLRFDVSVQFLAFRPEHVKADIEIFDGITDQYVLISTCSAYRKPSLTPVITEDTPLENP  
FWEYSRLKIACEWVLAGSGAASHTGNGEETARTEEKVRIIKEKARDEDVAFSEAEQRSFP  
YTIVRPSHTYDNGWIPGCFGSASYGLAWRMLNGLEVVPVPGDGQSLWTLTHASDFAVGLVG  
LLGKREALGQAFHITSDEHLTWDIAHSIIGEALGVQPKIVHIPSDFIAKVLPERGAGLLG  
DKAVSVLFDNSKIRRFVPEFAPRISFTEGIHRSLAWFDAHPDLKVPDKAMNADMDAILER  
WQLCAQ\*

>SPBIB\_v1\_260066|ID:27163380| putative dual use protein Tyr:Ser/Thr phosphatase [Uncultured spirochete bib]  
MIFSELKIPGSSGIIGMASCPGRWTQLAAKSSMKAAALLGPQLAAQAAPSIAPQPAPPDE  
QTHDYLVRDLAIIAWGAEILVSLIEPSEYVLAGVERLPELVPIGIRHIELPIADFSVPD  
NRWENAWEREGALVRSALRRGGKVCIHCMGGYGRGTGMVAARLLIEFGVEPEEAIARVRS  
RPGAIEMPQQEAWVLKLRQA\*

>SPBIB\_v1\_260067|ID:27163381| exported protein of unknown function [Uncultured spirochete bib]  
MRQKAIRSLFLAVVCLLAVSPVLAQKVQGEAGIGFMAISPNTDTIANFAVGDMLYGV  
VSYAVKPWLGVSTDVLYLGDSYYGPGSGMFNEGPSSWAGLQASGDKANWKYYESFIYAP  
LSINLMAPLGIVRPYLGLGPAFYFHFSTNQDTAFTDYLKTHYGSAVVGRIGQGFTARV  
GFDVFLGDSLSIGAGYVVREDTPVTVFKDIGDLNFYKEKGYLFLVGRFYIK\*

>SPBIB\_v1\_260068|ID:27163382| protein of unknown function [Uncultured spirochete bib]  
MTENQFKESAAGWQNEFSASITIIASDFTILYMNDKSAAVNAKWGGKALIGKDVRACQQG  
RNERRVH\*

>SPBIB\_v1\_260069|ID:27163383| TRAP transporter, 4TM/12TM fusion protein [Uncultured spirochete bib]  
MRKLDGKVKIAIYVYIIAVGVFHL YTSIFGNFEAYLQRALHLSMVLPLVFLYPISSKLLK  
DSAVPFYDWWLAGLSFLPGAYIAANYWAISTRIVQVDPITTTQLVLGILLVLLLEATTR  
IVGMPLTIIALVFLLYMGVAAKIPGLFQGISFSVPEIVEEVFLTDEGIFSSPLGVSATYV  
MIFLIFGGFLEKSGVGDFFMRFAQAFTGTQPGPALIAVTSSCLFGSISGSAVANVYGTG  
TFTIPLMKKIGYPSFFAGAVEAVASTGGQLMPPVMGAGAFMASFLGLPYRTVMIAAIP  
ALMYYGAVFLMVRLSAHKYGLKGLSAEELPKKKDVLKDSYMPIPLVGLVYFLLAGATPMR  
AAVFGIVLAWLVSFFKPKSQNAKRRLSIIIGAVISVLITVAFVFRFVEPIIKGNIGLW  
ILVAGFVAATFLNDGMKPKDVLDAIYSGTSGIPLVAIACATAGIVLGSVALTGIGGKLVG  
FVLSFAKDYRFLGLLLIMASILLGMGLPTTGAYILASALGAPILVKMGIPPLSAHMFVF  
YFAVISNITPPVALAAFAAASISGANPNKIGFQAMRLGFLAFVVPFAFCYDQGLLLQASP  
IANVLAVATGIISVLAFGYFWVGYIKHPIPLWMRAILLVAGVMALAPQVLYVAISAGLVI  
VCYILSASGKVVAHVHQAQAAVLKE\*

>SPBIB\_v1\_260070|ID:27163384| TRAP transporter solute receptor, TAXI family [Uncultured spirochete bib]  
MRRVMILLLVFVILVGASAQSKAGWPDQLKFMSGPPGGNWFALGTALSEMWSKNVIQTTS

SSGGVSNILNVDAKKADFGFTVASLLGAAIAGEEDFEGKAVKNAVIMANLYTQYTYFIM  
RKDFAEKNGIKSVDDMIKADIPVRFATLKPGTASEFVIKALFKKGYGTDYDKLKKKKWTF  
EFTSYDGGADLLADNHLDCFAFSVGKVASVVMNIESNTPVVILPVGQKALDALAAAYGTT  
TFTVMPGVYKSVTTPIKTVGDYTCIVIRKDFPDNLVYELNKSMTWANRDNLAMAVKDISEL  
NPKEALPEGLPAHPGSVQFWKSAK\*

>SPBIB\_v1\_260071|ID:27163385| Transcriptional regulator, IclR family [Uncultured spirochete bib]  
MAEVNSVKKALAILDLLSDRNSRSLSEISKALALPKSTVHSLLETTLARVLERDVESGS  
YSLGIRLIELGYCAQTGLDLVRIAAPFLKGLNVRFDETVHLLTVLDNDEVLYIDCIESQRR  
LRTYSVIGVRAPLHCTSVGKAILAFLDDGEIRRIIAERGLPGFTENTITTEARLWEEIAH  
IRDQGYAIDREHEDHLRCIGAPIFNARGEVFASMSLSGPAERNTLERLESMVSALLEAT  
GEISHRLGFRNREFSRARGENHITPANSY\*

>SPBIB\_v1\_260072|ID:27163386| DctP family TRAP transporter solute receptor [Uncultured spirochete bib]  
MKKAVFAVVALLMLASPAIFAQQKPVKLVFTSVSVPGDAHTQAMFVFKDEVEKLSGGQIQ  
VDVYHSGQLFTQQAEQDAIRKGTVDMVYTSAQWLAEFIPYLSMFGAAYTFQSVDQMTKTF  
NGPIGKKIFEEVAQKTGIRPLVAYYLGTRQLNLTAKVGPITRPEQMKGVKLRVPNSPTWI  
AMGKALGANPTPMFNEVYMGLKTGAIEGQDNPLPTDKNAKFYEVTKYIVLTNHVVDSTW  
PSINEKKWQSLTKEQQGWLMQAAEKARQFCDKTNLDNEKNILDFFRQQGLTVIENPDRAA  
FAAYAKNSYLTESKDISKDWDLNLYEEIQKLG\*

>SPBIB\_v1\_260073|ID:27163387| conserved membrane protein of unknown function [Uncultured spirochete bib]  
MPFWLKKTKGFLVDCIELYLPMLTFTVLFVFSFMSQIVARYLKFPLIWPEELSLICFIWTA  
LLGGLYAKRTGSHVAFTMLYDAAKPLQKAMRIAGNALLTSLILIFIPSWNYIQFMAYK  
KSDALRIPMNWAYFPFIVFLADMIVRLVIDIVKDIAGKASGGGK\*

>SPBIB\_v1\_260074|ID:27163388| TRAP transporter, DctM subunit [Uncultured spirochete bib]  
MNLALIVFFVSFTLIFLLRIPIAPGMMMASAFYFALSKNPAASLDMVAMQFLTNMNASFI  
LIAVPLFVFMAEIMNSGKVTNMIFSANALVGKRKGALGHVNVVASIIFSGMTGSALADA  
SGLGSMEIKAMREQNYDDGYTCAITAASATIGPIPPSIPMVFYSMLSGASIGYLFLGGV  
LPGLLIGVGLMIYTAIARARNYPEGQSLKPLEFWKLTLSIPALFSVVLLGGIYTGV  
TPTEAGALAAFYALLVSVFLYRAFGWKDFKQVLVNTVVRTTGTLSSLVGSAYAFSYIVTIE  
KIPNFVASLMLGLTTNKYVMLLIINVFLALGMFIDTMAITLVFIPIVLPIINQLGIDL  
HFGVVIVLNMIGLSTPPYGMMLLYVVSIGSGTPLKTIKEIIPMIFVIVVVLFLITYIPD  
IVLLIPRLSGYR\*

>SPBIB\_v1\_260075|ID:27163389| Dihydrodipicolinate synthase [Uncultured spirochete bib]  
MNKTIPDGVWPTMITPYHEDGRIDWDALEKLVEWHIERRVAGLFAVCQSSEMFHLSLRER  
LELARMSIKFAAGRVPVLVSGHVADSLDDQIEEAKMMADTGADAFILVTNRLAKRHESDD  
VFKRNLELFLDRFDRDILLGFYECPAPYKRLISPPELMRFVVGTRFRGFLKDTSCRMGDIK  
AKLEAARGSGFKLFNANAATLLASLRAGASGYSGIMTHFHSDLVWLCRNWASRPQEAEE  
LQDFLGLASVIEYQLYPVNAMYALQLEGLPITLYSRRADARQFTESMRLEVEQMMRLSHK  
FSERIRSLD\*

>SPBIB\_v1\_260076|ID:27163390| Class I peptide chain release factor [Uncultured spirochete bib]  
MNKELLAASILDNAVIDFARSSGPGGQNVNKNVNTKVIARVPLCTLAGLDDKEMELVRTRL  
AGRINAKDEIVSVQEERSQVQNRERALNKLIALIVAAARRMPPRIPTKPTRASKERKLT  
TKRRRAAIKGYRQKPLE\*

>SPBIB\_v1\_260077|ID:27163391| exported protein of unknown function [Uncultured spirochete bib]  
MKKKSGLKALALIVALAVIALASCDINAPAGTVVDLNSSEKSLASADASGLSKGKPKTP  
VVEKIVGTAIAPDCFFFEFDMVGQKQKAFARALVPVSPDGYIKNGKLLYNTKRYKIASFVY  
DQASGYLQGTTAQEGGVSYAFAGLYSQDSGFFGTISKFEQGVKESGYFIGSPMLGGKNIA  
NYIGVATYLFPTPTPQTLVFNTILDFDAGTAVGTWSESGEGWNYSLHGPIAGTVEGDSVN  
FNASVLPFRPYMLYDMTAVGSGTFKNGKKTVSGDFTIYYGDLVLPSSLTATKEMP\*

>SPBIB\_v1\_260078|ID:27163392| NYC1 chlorophyll b reductase [Uncultured spirochete bib]  
MNIQDSKSLVVIITGGTRGIGRGLAKCFLER GASVVISGRIGEVVRRAVEELKAEVAGPG  
SALKSAEAVPVAGTECDVREFAQVQALWDYAISSFGRVDIWINNAGIGQPQSDIDELKPD  
LIRDIFGTNCTGALYGCKVAMTGMRAQGDGAIYNLEGLSGNSIVRGMAAYGASKRALAY  
ITDSMAKEAEGSGVIVGALRPGMVVTDLIIGEYAGKPEEWKKVRRIFNILSDRVETVAPW  
LVDQMLQNRRNGRRIWLTGLKTMGRFLSAPFVKRSVYPEME\*

>SPBIB\_v1\_260079|ID:27163393| conserved protein of unknown function [Uncultured spirochete bib]  
MENQKTRIAIAYDFDGTLAGSLPEHGLLQDLGIESASFWNEVKERAETQDADEILAYMC  
LLEKAKERGIEITESRLGSYAANIPFFEGVVEWFGRINKYAAELGVGIDHFVISSGLRE  
IIAASAIAPCFKFVFAKYLYDERGMASYPAVSINYTTKTQYLFRINKGIFNFFDNKRIN  
TWIRLDRRPYPFKRMIIYIGDGDTPAMKMTRYQGGYSIAVFDPLKWDDLSQQAKIYKLI  
AEDRVQYVAPAVYSEGSLLDIAVKGIIGKIANEP\*

>SPBIB\_v1\_260080|ID:27163394| RecG-like helicase [Uncultured spirochete bib]  
MTVYKGLARDFKDDVARNVIDEKIANCFLRQFGYYPGSSERNNSWTYSLRFMDTIIRIGSI  
PDDCGVLIEFNIPNTNKRIDFLITGKDENGGSNFVVELKQWQEARATPYKDVVITFVGH  
GERTVAHPSYQAYSNTFLVDMNTSIQQNRIGGHACAYLHNYQPKRNEPLLEQHMETVL  
KAPIFFKHVDVRKLQDYIASKVGRGNGTEVLKHIENGEVVRPSKELIDCVVGLLKGNDEFIL  
LDDQKVAFEAIMSICSSRDKTVMVMVKGPGTGKSVIALNVFGKLLQGKKNVRFVAPNAA  
FRNVMLETLVKNDRQRVRVKNLFMGSASLWECRDNEFNVLVDEAHRLKNEMAYGYKGD  
NQIEDIISSRIVIFFVDDRQRIRPEDIGSSDEIARIAKKYNADLHEFSLDAQFRCAGAK  
DFIAWVEKALQIDSSARTTAWDRESDFRIYSTPNKLFKAVKEKNDEGFKARLVAGYAWD  
WTSLSENNDRAQILDVSMPEYDFAMPWNQRTKSELWAILPNGLEQIGCVHTIQGLEFDYI  
GVIIGNDLRYNRATGKVEAVWNEYKDKAGKKGLKNDPVTFNALVKNIYRILLSRGMRCGY  
VFCRDKNLRDYLQGLYDSKLEYADYFVEENNSALWAAEGGHGKPEDKNSYSI\*

>SPBIB\_v1\_260081|ID:27163395| conserved protein of unknown function [Uncultured spirochete bib]  
MEKKPIIVVDGLGGGIGSQLCTRVRQAFGHDEILALGTNASATEQMIKAGADRASGE  
NAIRVSINLGQIILGPIGIVLPDAMMGEITPRIARAVMHASSKKILLPVNQPFFILAGLP  
PSSLSRCIEEAVALVASELGLAVH\*

>SPBIB\_v1\_260082|ID:27163396| putative cation ABC transporter, periplasmic binding protein [Uncultured spirochete bib]

MGIGSSHSKRSLVWMFLALLCLSALPLAAQDKPVIASSTSWVQAYAIAGAKNIVTIAPFE  
LQHPPEYEIKPSDLLAVQHASLIVYSGYEKFAKKLAETAQNSNLRLAVYTDNVPSTIIA  
ESKKIAEALGTTQAQEQWAKSFTAFSDAMRERVAALPDKRVVVQAYMKTFFALWGLDQV  
GTFGPGEPSPAVVLDLIKKKPMVLDNYHNPGGKALAESLGVPHVLLINFPGKDGTRTIE  
DVFLYNEKAILSQIGK\*

>SPBIB\_v1\_260083|ID:27163397| putative Zinc import ATP-binding protein ZnuC [Uncultured spirochete bib]  
MLDDTSMPGDMPTPGDMRPNPPLLSAKNLSIGYKRSEPVVRNICIDLTARTQRRTVIGF  
VGPNGAGKTTLLKTCLGLLPPLDGELRLLGVDTRTAAFAQTRKKLAYIPQNRPEGNSGQL  
RISVREAVSFGRLGKLGLTGRFRGLDREAVEAAIAYCGLEDIADKAVQDLSSGGQFQRVSI  
ARAMAAEPALYLFDEPGSYLDEEGQKAMRTLHHSIAKSGVPLILVTHDRRLVKLCDAVIV  
FRKGTALLNTSAFLAETRGREI\*

>SPBIB\_v1\_260084|ID:27163398| putative ABC-3 [Uncultured spirochete bib]  
MMELLHIPAFSRAIALFASGLAFPLLGIYIFSLELIPARFGVMHLSLLGATVGLILGVD  
PVLFAMLFSAAGFAISGLSVRRSGGTSGGAMALLMTASLGIVFILFYKTNIHAIEAFNL  
FWGNVLAALDKTEVLLVVIVSALILAGTARFLRPISAVLFDRETAFAFGFPSTVVYTAILV  
VVCAGIGLGMRTGALMVDAVTLLPALAAQSLKKNFKPTMLLASLFGVCINLAGFALAVI  
FDLPTSPAIIVGTVCVLAACRLAARRNLKKGSDPVS\*

>SPBIB\_v1\_260085|ID:27163399| Na/Pi-cotransporter II-related protein [Uncultured spirochete bib]  
VTSWFQIVLQLAGSLAIFMYGMTLLSDGLQRAAGERLQRILQFITANRVVAVLTGCLITI  
IIQSSAATVMTVALANSGLLSLKQSIGVIIIGANIGTTITAWIIAVVGIKFNVLAAAIP  
LVGIGYLLTLMKRSEKLDAGIALGLGFLGLEYIATAVPKPSPELLAFLGRFSPET  
QPLSLILCVAAGAVLTMIIHSSAATAMIPLAVKGILSFEIAAALTIGANIGTTIDAFL  
ASLKGEATAKRAAWAHILFNVIGAVWAVIVFRPFLGLVRLVSGYGNGAGAIGIAIASLHT  
LFNGINTLLFLPFINQYEALLKKLVREREGGEHRMVYIAPSLHPAPELSQLQARAEIRAM  
AGRCRGMFDASLDLVSNEKKDMRGRLEWFQREEQYLLDDMREALVGFLKQVQADMPESL  
RARVLGKMQIVAELESASDECFSIAELMVKKSRRDLKFDEEAALSLKPYGEAVKQFFDFI  
TSNLDRLDATEFGKAGEIENQIDSFKKELKKMARKRLNAGADARTELLYIDLVRHFEDI  
GDCLYAVAGELERI\*

>SPBIB\_v1\_260086|ID:27163400| conserved protein of unknown function [Uncultured spirochete bib]  
MSFRWNEEKNAALLKQERHMSFERIVVAIEEGHLIGVLEHPNKEKYADQMILVVEIDEYAF

CVPCVKEKNGDYFLKTLYPSRKYTRFFKLGGKL\*

>SPBIB\_v1\_260087|ID:27163401| conserved protein of unknown function [Uncultured spirochete bib]  
MTIDEDRELIQSVENGEWQPVKDFDSVREKLVKAAKETALKDYRMNIRISKRDVELLKAK  
ALEEGLPYQTFVTSILHKFITGKLKEGV\*

>SPBIB\_v1\_260088|ID:27163402| membrane protein of unknown function [Uncultured spirochete bib]  
MEAKQKTHAKASVVVARKPRTRASAAGGSAAGGRSNGGRTKPSVFKSARGIVAIAFIVLG  
ASALLSMLIWTRYPSVWKPIVVPKMLIGIFSWAAYYLPVWLFWAAALAFVPKFCPRITY  
LLGISALPFVVVTA FARLSSNPGQFFESHPSMAKVG LSSLYAALGFLFAASLVIVVAGYI  
KLT EWLKTNGYIKTRAERAQAGKGQSFGEKLATFVKNISMRRREERRKRKEEARLARA EML  
AQQNISLHIPEVPAPDPLKSGGQTPNFNFSGPAPGAAAAQANPSPAATAALDAAGISFTS  
VPPARPAQPGDEPKKAIVERILERKAAKTYHVPIDGLLNTYPDGQYWIIDDKTRASAGVL  
KETLA EFGIEAEVTGIRKGPVITMFEILPAHG VKISKITNLSDNIALRLAASSVRIVAPI  
PGKHAVGIEVPNERRAIVSLRELIESDHFRQTKMEIPVALGKDIAGEVQLVDLTQMPHLL  
IAGATGSGKSVCVNSIILSILYKRTPEEVKLMLIDPKIVELKLYNDIPHLMTPVVTEAKK  
AFQALQYICEMERRY SMLDSLGVDRDIRSYNRRVRERNLAQEKL PYIVVIIDEFADLMQT  
TGKELESTLARLAAMSRAVGIHLVLATQRPSIDVITGLIKANIPSRIA FMVASKFDSRTI  
IDMVGA EKLLGRGDMLFSGAQDPFPV RMQGA FVSEEVERVVAHVKT LGEPEYIDDEIFI  
DEEDLEEPTLFDEEGSDPLFEKALEIVLQQGKASVSFIQRRLKIGFNRAARLVEMMEEKG  
IVGPAQGSKPRDVLRNPEVFDSPEGGGEGRS GHGGLHSGPEEEEEG\*

>SPBIB\_v1\_260089|ID:27163403|slyD| FKBP-type peptidyl-prolyl cis-trans isomerase SlyD [Uncultured spirochete bib]

MEIKKDRVVTIDYTLRDDTGRLIDSSAGSEPLVYLHGNENIIPGLEKELEGKNPGEAIEC  
SIKPGDAYGDRDEALVFKVQKKDFGENVEVAPGMQFEAHGENGVQIVTVVKVDGEEVTL D  
ANHPLAGETLHFDVKVVDVREATPEELEHGHVHTGHDHEEFEENEEDFEVEDSSES\*

>SPBIB\_v1\_260090|ID:27163404| conserved protein of unknown function [Uncultured spirochete bib]  
VPRASIFMKFYSKVRVRLDLVIFGVAAALVVGTSLLVLNRQSGTRYVQMTGETGEWIAP  
LNKDAEYQIPGLGITYVHIHDGTA AVVDS PCKNKLCILAGAISEPNQWVACL PNKVFVR  
ITSSGTNDSSGGVDAGAF\*

>SPBIB\_v1\_260091|ID:27163405| putative heptaprenyl diphosphate synthase component I [Uncultured spirochete bib]

MPAPSSPSCGNVRSRFSNRADVTALLAAFCFFLSAIEYMLPKPLPFMRLGIANLPILLAV  
DMLPFNWFLVLA AAKVVGMSIVSGTLFSYVALFSLAGTMVAALVMRGVRRRTGGHAVSLVG  
VSVAGAVTSNAMQMLIARYVIFGEVAWLIAPLFLVTGLITGTLMGFFAEFFVEHSGWYSC  
AMGESDDLAFGFEEDEEGSGESGASGDSAAAESKDSASARVQ GASGNAADFSSQNEKKLK  
PDRGARKSQRNERRFERRHRYEDMFEPWVGALLGAGIAIFFLLQRDIVAKVLYLAVFILW  
TWFAGKRFLISTLVVSAGIVAANLLIPSGRVLAKIGPLAITQFALTEGLSKALTFEGLI  
YLSKAAIMPGLRFPGRFGSIIAQAFQYDRIIEYRGKVHAKTVISDIDRLLQVVWTSARI  
SGEAEASAASKGAQAGPAHRSRVHRSLLAAGIAAAVVIIIPFAAKLIAS\*

>SPBIB\_v1\_260092|ID:27163406|leuS| Leucine--tRNA ligase [Uncultured spirochete bib]

MAKYPFKEIEQKWQQRWEEDQTFRAVEDEHY PKEKRRYVLDMFPYPSGAGLHVGHPEGYT  
ATDIYCRYLRMNGYNVLHPMGFADFGLPAENYAIQTGTHPAVTTYTNINRFRTQIKSLGF  
SYDWSREVTTC DPEYYKWTQWIFLQLFKKGLAYEAEMPINWCP SCKTGLANEEVKDGHCD  
RCGTKVVRKRIRQWVLKITAYADRLLEDLDKLDWPEPIKLMQRNWIGKSEGATVIFKIDG  
HDATLEIYTTRPDTLFGATYMLAPEHPLVPSITTPDRLAAVNAYIDEAAAKSDLERTDL  
AKDKTGVFTGAYAINPVNGARIPIWISDYVLISYGTGAIMAVPAHDSRDWDFAKKFNLP  
IQVVAKPGETGPFDRPAECFEGEGIAVNSSEFNGLPTAEFKQRITAWLEERGIGKKAIN  
YKLRDWLFSRQRYWGEPIPVVHCEHCGIVPLPEESLPLTLPEVKS YAPTGTGESPLATIE  
EWWQTTCPKCGPARRETNTMPQWAGSCWYYLRYLDPHNPKAFADR SKIDYWMPVNLVYG  
GAEHAVLHLLYSRFWHKVL YDLGLANTDEPFMRLVNQGMILGEDNQKMSKSRGNVINPDD  
IVANYGADTMRVYEMFMGPLEVSKPWSTAGLVGVS RFLERI WALSERAIIDALMSPELEK  
LLHKTIKKVTNDTATLNFNTAISQMMIYSNELAKLESIPRAAWEPFVLLIAPYAPHLGEE  
LWAKLGHTESVSKAAWPTYNEALTHDEEKEIVVQINGKVR SKFTAPAGTAREQLVEMARQ  
AEKISDWLAGKEIIKAI AVQDKLVNFVIK\*

>SPBIB\_v1\_260093|ID:27163407| protein of unknown function [Uncultured spirochete bib]

LLWILLKWP MHGKYSVMNLAYEFVKASLYASIRRGGFHASFSFLPKPGLCVSPARTERT

LVRXX  
>SPBIB\_v1\_270001|ID:27163408| conserved exported protein of unknown function [Uncultured spirochete bib]  
MMKERQTMWRVGLVVSILAASLVLAEVFSKQVEHPAFSRMQGAADRMTRAEAAIAARRVA  
LGAIDPNLDPYRTGLIGAESSFLTTTVGDIVAKRTTTTTAFAALVVRVYFYELGLRPGDR  
IAVGSSGSFPGILLAVLSACAETGVEPVIITSIGASEYGANIEGLSNAEMVAACRDAGIW  
PFMPAAISPGSDADQGISSLYRLEPSDELARYAHDIAARLQVPFIKGNLEESIALHLRT  
YQQAGPIKAFVNIGGADVNFVGGDTSCLKLKPGLILPSVGRQSKLGGLVGYYSRGPVVIH  
LLNIKGLALQSGIPIDSNPFAPLPADVITYSRKKLEWLLILGLVLASAALA\*

>SPBIB\_v1\_270002|ID:27163409| CapC protein [Uncultured spirochete bib]  
MAGTSIIISIVLGFVFSELTGWLTGGLVVPGYLALYVDQPLRIVMTYAAAALAFVAVKLL  
ARVTILFGRRRFMAFILAGICAGALLDMMTGMLPPSGSDLRAIGYVVPGLIANDTWKQGP  
AKTLLASLAVTLATRAVLLLIAH\*

>SPBIB\_v1\_270003|ID:27163410| putative Capsule biosynthesis protein CapB [Uncultured spirochete bib]  
LIQAIAAAAFAFGLAVAGIIRRAVEHDLSCVLHRILVNGTRGKSTVTRLIAAGLRAGGI  
TTIAKTTGSAARLVLPDGSEQPIHRKQGATIMEHAWFAHMAQKARAQAMVAECMAIRPDT  
LSVVENALSQSTIGIITNVRLDHEDTMGQNLASIAGCLSLTIPRNGKLFVGPKEPELLA  
IIRKRATERGAALLETVAPGPEIEGYCARFAYPMFAENLALALACAACGVPREIALQGML  
DAAPDPGVWPTLDLEWKGKTFRIINGFAANDAESTLALWHAESHFDVAAHQIDVKVLVY  
NHREDRPWRLDQVLSLVRPIGADLVCVIGAPRALTKRRIAKSGLALPFLVLDSDAPEYLF  
AQIESHVPQAAPQATAHVPPQATAHVPAQAAQKAARIGILLTGNIKGAGMALTEGFSAMA  
ARAAAGASAARAAKEAKAEKQAARRERT\*

>SPBIB\_v1\_270004|ID:27163411| protein of unknown function [Uncultured spirochete bib]  
MQTKGLVNMPNNIVPVISPDDVLDSFLALGKCNLDMPSWIFETARTSALAKNDCQVLH  
APSWAIRHGVAFFSSRERDLIIRADSTESNESDGWTAKQTVRPVAGAGLEGAQDQLVLS  
LPHRVEHRRWFVSYIEDCFGAGFRARFEDRLKSPHEERCTYHSLKNTSGWIEMISGNPL  
VCTPPKVQAGQRLFIVAVPYPS\*

>SPBIB\_v1\_270005|ID:27163412| conserved exported protein of unknown function [Uncultured spirochete bib]  
VNYNKRGLAVALAVAALFVLCIAQAFGQQGSQKREQPAIGLSIVLLEVRPGPGVARIFLL  
SDLDSGLAGTAFDTPVFEFADEAGQADGVLHPEGANHTEGELLQPALFVCAGTHENEIAG  
ILAA YWLIKGRVHGAKL FVMPRANAAGATWSLQNPQSPRILQAIPGISRTFRYGARLSN  
LAYETVSDPPLFSPAAPAGFPALAGQEMRNLNREYPGSTDSSMTARLAFaitsLLKKN  
ISIAIDLHEASAGSNLGSIVTRPESLDEAALAVLDLEETAGKSFRLLEESKPEFAGYSHW  
EWGKLGIIHAFLVETFNPAQPSDDPAVDQFNNAKSPLAERVYAHLWAVQALMANAGVSLGI  
SVNIEGLPASVLEVEAWLKAPLSGAAP\*

>SPBIB\_v1\_270006|ID:27163413| conserved exported protein of unknown function [Uncultured spirochete bib]  
MKRTVYFILTLFVLGFGSTSAQTAALIPPQLAGIFEAPGFITSAGQTSDAIIVKVLVNT  
RLKLNFGYDIAAKPQAVSGAKTLVVLGASNKGLGAAGLSIEQETERVKAVLALAKSEHM  
RIIAMHTGGTARRGESSNAIALCVPHADVAVIVEGGNNDGFFTDLCAKEKVPLVMVPSI  
AEAGNVLKGLMAK\*

>SPBIB\_v1\_270007|ID:27163414|ggt| Gamma-glutamyltranspeptidase [Uncultured spirochete bib]  
MMKTKMHGERESTGNQHRWLGGFSKILLAIGLLFFVLSPSVFAADTIKPEVTARNGMVAS  
AQPLASAAGLEILMAGGNAVDAVASAFALGVVEPNATGLGGEGMMVIYLADKKVTTSID  
YRSMAPLADMSKVKFPDPGHVSVAVPGTVAGLCLALEKYGTMSLAQVMAPAIRYARNGFI  
VSDTLASTIKDRFDPISKNDALLAILAPEGLPLEAGQIIRNPDLATTLEKIAAGGPDVFI  
KGEIADAI AEDMAKNGGYITKADLAA YTAIEREPVRGTYRGYEIISAPPPVGGLSVIEML  
NILENFDLASEQPLSPRNVHLMAEAMKRGFADNSAFIGDPAYTKVPVAGLLDKEYARQRV  
KEIDPAKMTPAVKAGTPPEHPSTTHLSVVDKNGNMVALTQTISSFWGACVAVPGTGILN  
NEMQNWSSKGPNSYAPGKRMRTTIIAQTIDGRPFVTMGTPGAGRIISTMVILAVNLLD  
YHMGVQEAIESPRFYARDTEKNLSIEARVPKETQDWLKSIGYSIKEYPDFDLFFGGAQAI  
VVDLETGIMHGGADPRRDGAVVFGF\*

>SPBIB\_v1\_270008|ID:27163415| conserved exported protein of unknown function [Uncultured spirochete bib]  
MRKRYSKALVMVLLLVAAGLPAQGASTILHDVRPDPAVTKIAWLSEWFSPLAGTPADT  
RVFILDGKPGATVAVAGGTHANEIAGILTAVLLVESAVPQTGRLLIIPNLNNSASTWTE  
STQLPAWIAIRTPSGTRFFKYGARYTNRVHQGTPDPEQYIHPKSNERLEGQESRNLNRVY

PGKPDGTLTERLAWAVMQLLKQEHVDVAFDLHEAGPESRLANMIVANPKNLDMGAMAVLS  
LELEGIKMKLEPSSSEFYGLSHREWGDETQACAFLIETPNPAQSLDSADPAEDSAYPLSV  
RVATHLASIQAILDAWNADAPEGKKAFTFRWSEWENIARQGVGSFLK\*

>SPBIB\_v1\_270009|ID:27163416| CoA-disulfide reductase [Uncultured spirochete bib]  
MARYVIVGGVAGGASTAARLRMDERAEIVMFERGSHISYANCGLPYYAGETIKERERLF  
VMTPEKFKAWLNVDRVRTEVEAIDRGAKSVRVRELDGREYSLTYDALVLSPGSEPIRP  
PLPGIDDPRIFTLRSVSDIDQIKSFIDEHRPERTIVVGGGFIGLEMAENLHTRGSFVTIV  
EALDQVMNPLDFEMAAIVHQHLKQKNVELYLSSAVARFEKAGSRAVVVLADSTRLDADMV  
VLSIGVRPETAFKQAGIETAPNGAILVNEENLQTNPSIYALGDAIAFPHILGMAMPIP  
LAGPANKQARIVADNIVKGAGTRRWSGAIGTSIAKVFDITAAAAGVAEKLKKNIPCMS  
IITHGSSHASYPGAQPLTIKTVFAPDGTLLGAQVVGVDGVDKRIDLIADYIRRKAKVTE  
LGEIEHAYAPPFSSAKDPVNIAGMTAENVLTRLRHAASVAVLKGNGAYILDVRTEEE  
FQLGAIPGAVNIPLDNLRLRLSEVPRDRAVLVYCGVGLRGYLAERIMRQNGWTEVFNLSG  
GYKTWELASEPQSHKGVYKPGLAAIQSASAKGAQELLHTTFAEGSGMPESIAAKRQAIVQ  
IDACGLQCPGIMRLKTEIDRLPEGGRVVISATDPGFVRDAASWCNVTGNLLISMEESKG  
VYTAMIEKAVKQSAMAAATGMAASQGGAPIVQYSPKGASIIVFSNDFDRALASFVLANGA  
AAAGKDVMTMFFTFWGLSVIRKPDAPRVAKDFMGKMFGMMLPKHAGVLSLSKMNFGGLGQL  
MMKARMKAKRVDMLISMIAQARQAGVRLVACQMSMDIMGVKREELMEGVEIGGVATYMDA  
ASQSGVNLFI\*

>SPBIB\_v1\_270010|ID:27163417|gpmA| phosphoglyceromutase 1 [Uncultured spirochete bib]  
MHTLVLRHGESEWNKENRFTGWTDVLDTKGVSEAKESGKALKNAGFQFDIAYTSVLKR  
SIRTLNFILDELDMQWIPVRKEWRLNERHYGALQGLNKAETAKKYGEEQVHVWRRSYDIR  
PPELALDDPRFPKDRRYAGLDPSELPRAESLKDTIARFMPLWHNEISGDVQKGARVIV  
AHGNSLRALVKYLDRISEDIADLNIPTGIPLVYELDDMLTPARHYLGDDEAVKAAAEA  
VANQGKAK\*

>SPBIB\_v1\_270011|ID:27163418| conserved protein of unknown function [Uncultured spirochete bib]  
MNGTTKTRRLAIRGGLLVYVLLMVLMMITGRRHTILIDNKDAADGSYSAINGMEVAIDR  
QESSEYYPGDRDKAMVQGQTHKIKVTIFDDNKTIKEFKVPLWSDVMIISVPKLIAGVEP  
WIEPFTMAEQIQEAQESGPPAGETSFQSIGPAQPMEVEQVPTP\*

>SPBIB\_v1\_270012|ID:27163419| ABC-type transporter, integral membrane subunit [Uncultured spirochete bib]  
MSAQKKFVKFFSQYAVVIIFVMITVAIIPPSGLSIKYILQEITRLGRNSFLVLALLLPI  
YAGMGLNFGMTLGAMAGQVGLIFAVNFGISNWHGLLALLVGLPISVFLGWICGLVMNRA  
KGREMVTGYILAFFINGIYQFFVMYMLGSVIPMGNRAIVLSRGGYRNTLNLESVRQSLD  
NILVLRVGGYAVPVVTFIIIALLCIFVWFKKTKLQDMRAVQDMVVAEAAGIPVEKTR  
IIAIIISTVLACAGQIIFLQNMGNLATYNAHDQTGFFAVAILVGGASVTHASIANVFIG  
VTLHSMFVVSPLAGQKLFGSAMIGEYFRQFIGYGVIALSLVLYAWRTRKAAADARLGLR  
GGTNGSTKVS AVKNGANGAAGNGGQA\*

>SPBIB\_v1\_270013|ID:27163420| ABC-type transporter, integral membrane subunit [Uncultured spirochete bib]  
MRNLKTFIEDFGWPRIIFLFLFIMAPFVRVRLDASISDVLNRFQNAIMVLAMVPM  
IQSGCGLNFGALGIVSGLLGATLSLQFQLHGILGFLGAIALAAPFALVLGWIFYAKLLNK  
VKGEEMTIAMYVGFSFIMFMCIMWLILPYNNPTMVWGYAGKGLRTTITVEGYWLKILNNF  
LAIRIGQFFVFPTGLLLFVGLFAFLMWLFLRSKTGTAMTAVGSNPDFARASGVDVDKMRT  
ISIIISTFLGAVGIIVYEQSFQFIQLYTAPSPMVFPAAAILIGGASINKASMVNVLVGT  
ILFQGLLTMTPSVINSLLQTMSEVIRIIVSNGMILYALTRKIKVSK\*

>SPBIB\_v1\_270014|ID:27163421| Monosaccharide-transporting ATPase [Uncultured spirochete bib]  
MANGSPLLSIQHVSKDFYGNVVLHDVSFDLREGEILGLVGENGAGKTTLMRILFGMPVIA  
ETGGFQGSVIIGGSEVHFSSPFDALDAGLGMVHQEFSLIPGFTTTENIVLNRESMRPSIL  
NDVFGDRMSILLRDKMRERA EKAIGKLGIELDPDMLVSEMPVGHKQFTEIAREIDREQTR  
ILILDEPTAVL TESEAEVLLQTLKRLASEGIAIIFISHRLQEVLAIANRIVVLRDGHVVK  
DTPNEHVSMRDIA SWMVGRSLGETGARSEGRKFS DIALKVHHLWVDMPGETVRDVSFDVH  
KGEIFGIGGLAGQGKLGIPNGIMGLFPAGGEVILEGNTVPLNAPAKALAMGMGFVSEDRR  
GVGLLLDESLEWNIAFTAMQVHRQYLLKVLGGLFSQRDERAMEDLCKEYVSLLDIKCTST  
KQKAKELSGGNQKICLAKAFAIKPSLLFVSEPTRGIDVGAKKL VLDLHNYNRDFGTI  
VMVSSELEELRSICDRIAIVDEGRIAGILPPTADISEFGLLMSGAMEAVNA\*

>SPBIB\_v1\_270015|ID:27163422| conserved exported protein of unknown function [Uncultured spirochete bib]  
MKKLVAVVLVLAFLVVGADVFAQAKAKFHIGVVTGTVSQSEDDLRGAEQLIKEYGSVKDG  
GMIQHITYPDDFMSQQETFISSVVALADDPLMKAIVINQSIPGTAEAFKRVRRAKRPDILL  
LSGEPHEDPLVIQGAADLALSADFVSRGYTIIWAAKQLGAKNFVHISFPRHMSYESLGRR  
RAIMEQACKDLGLNFYFETAPDPTSDVGVAGAQQFILEKVPQWIQKYGKNTAFFCTNDAH  
TEPLLKQLFAYGGIFVEADLPSPLMGYPGALGLDLSKEAGDFPAILKKVEAAVIAKGGAG  
RFGTWAFSYGYTLTAGLGEFAKRVIEGKAKKDSMKDVFDSLKGYTPGAKWNGAYYVDMGT  
GVRANKQILYMDTYVFGKGFLLPTTQKQVPEKYTIKMHN\*

>SPBIB\_v1\_270016|ID:27163423| putative Adenylate cyclase [Uncultured spirochete bib]  
MAQASEHYRDFPPARMDATIEPMQFSRKRFADELYYYSNQFVLFVMIISLTSGSWQNAI  
VTSLIVLLFMLVQTGLLTVQGHIPVLRLLYSFITPAGYSILRATLSDIAFTETATMLLWG  
ASVYIAVFQTLVLRRPFLKRLTETALSVGSALIFILFYAYLDRISVTGAFSRGEIDS  
EAMIQALRIQSFPSVDFKIRAPQHLFALFGVISDFMMLVARMRAITLQQRLTQLEMP  
KEDQRILAASHTAESEGSKEPESHTISEPVAQSAASTLSTANSPELSGLPLQSPTSLS  
VTVVSSDIVGFTDLSEQLGRTAATLLNRYAYIWITHCAGSFGGRIASLSADTVVIIFGLV  
DSDRSADRALNATYAFLEELEGLREDMVVQSLPSDIKISVGIHAGFVTAALLGPPGQQKM  
SFYGDITIAVAARLDSLCREFHQNLVSHAAYRRLTLESQVTLERFSEVLLRKSTRPMPPLY  
AKKP\*

>SPBIB\_v1\_270017|ID:27163424| exported protein of unknown function [Uncultured spirochete bib]  
MNLRRNNLSGKSRARISENAHLQSRASHKIDALVSFAALLVVVAATATAILFVSCSGSLD  
ATLKTGDSVRAAVRLDVPDALSGRVRQFVGLGSREPLFNTEAVRNQFLGRTSIMLVDAST  
PSPEVLTSVVWVPNIDALIADTSLVPQGMIOFRKIPAQGSAPAMRELSVLSRENAPYML  
KLFPGVDKRIVESLSPALEPDPVSAAEYRLNLEQVIIGKKYMAAFDACAVDIVITVPR  
IAAAAGGSFSGPIFRAKLPLFDLLTLEKPIVFSVRWPE\*

>SPBIB\_v1\_270018|ID:27163425| PHP domain protein (modular protein) [Uncultured spirochete bib]  
MILTFDFHNHNSCLSPCASLENSPSEMAKRARQKIEIFALTDHNSALNSATFAIACARQG  
LIPFFGLEMNPFEEAHLAIFPDPLAALAFSDQVYRYLPQLEIDPGQFGDQVVVDPKDEI  
LAMPAAWYGNALQESFAFFADAHAHNAEALVIPAHVDRAQFSVYSQLGFLPPGAYDAVEAV  
GADPDPVLSGRHCVISDSDAHVLEHVGRSSAVEIADEAIVNELRAGLAAMVERWKQWGH  
SENAQHMKSadGSDDICKAGISTAIPGLAPLVSFLAEWYPRRESLALLEAMRRSFHEKKA  
WSVYKRPAL\*

>SPBIB\_v1\_270019|ID:27163426| conserved protein of unknown function [Uncultured spirochete bib]  
MKHNTMTTRQIFELIDAEVIQGDfDEAPVAGVYTSDDLSDVLANGRNATVLTIQAHQNT  
IAVASIVGISLIICNSRPIVDNMAEAAVQERIGVVRTSLSQFEVSGRLWQALHAQGEPD  
DSHIRFS\*

>SPBIB\_v1\_270020|ID:27163427| ABC transporter, ATP-binding protein (modular protein) [Uncultured spirochete bib]  
MGAPIFAHNANAQKKAGKLMIELTNISKTYAKSGTKAVDSLTLRIPDGAIFGFLGPNAG  
KTTTIRIMTGAIEADSGSVLIDGIDLAKEPMEAKRRFGLVPDTPDLFSRLRAYEYLNFA  
DVYGVASDRITVIEELAAARFELSDALKSPIGSMRGMRLNLIASLIHKPHNWILDEP  
IVGLDPHAFAFALKELMRAHAASGGTVFFSTHVMEVAERICDKLAIINKGKLVFTGDLEGL  
RELRESRGRLSGQVPLVGAPNFSAREAGMVNIEGADQREESLEALFLALVEEGEQVPEEV  
SKL\*

>SPBIB\_v1\_270021|ID:27163428| putative Membrane protein [Uncultured spirochete bib]  
MRSPFISLLSLSLKSVAIHLPTQKELASPKVLLKTFGWIVLAVVLLADFGFMFAMMDIG  
MHDALAPFGMQSLMLIYATVTASVLVFLFAFITSLSFFSSAPNEALFLTMPFKPSELLAA  
RMATVYAIEAPIAFLVMSIAAGVYGIKNSPPFDYVWMLLNALALPLVPLAVSYAVLMPL  
VSASRWLRRKNTILYVGGFIGLALALGFNWYLQTMARIEDPVLLRKLIDNELNFADIA  
NWWPPAWLTMTAIGNSSMPAAFAATLANLALGTALAAAAATIFGRSYTKILANFGELAAV  
KGKIGRSQAQAVFAPRPVFISLVQRELHLMNREPMYFLNGPFVIVLLPVILAISLIAQQG  
QIQQALQQLRPLLDGQAGYLIPAGIGVFLASSTSIACAFSRDAKAIYFLKSLPLEPRDI  
IAAKLVHALLFAALGIVFGVVGVLGLLGIRLVDAIVALVAVLGAVTNICGLVIDTFWP  
RLSWENPMSALKRNPNTIIVILGTMGLVAGLGALSASLPFQKYSFALLYGTVFLAAGIGF  
GVLLFRKGS AFLRQMEP\*



>SPBIB\_v1\_270022|ID:27163429| Holliday junction resolvase-like protein (modular protein) [Uncultured spirochete bib]

MRFGWLFSRAAAVYAECMNI E GLHAGLQAGPAIIAALIVFSALVIAAGVLA YRAGRQRGL  
LEAELSEGERMDLARKDAIERSRAVL S GQISEQIAPWLPDFPANPSDARFIGKPVDFVAF  
CGADEGVVREIVFIEVK TGRSALSPVERSVREAITQGQVRWVEYRLE\*

>SPBIB\_v1\_270023|ID:27163430|pckG| Phosphoenolpyruvate carboxykinase [GTP] [Uncultured spirochete bib]

MQFPSYVKHARLLSWVSSMKDLCKPDFVYWCDGSEEEYNTICQSLVASGTFIPLNPEKRP  
NSFLARSDPSDVARVEDRTFICSRRKVEAGPTNNWMDPKQMK S ILSLFDGCMRGR TMYV  
IPFSMGPIGSPMSYIGVEITDSA YVVANMRIMTRMGRKVIEALGENGDFVPAMH SVGMPL  
AVGQKDVWPCKENK KYIVHFPETREIWSY GSGYGGNALLGKKCFALRIASVIARDQGWL  
AEHMLVLGVESPDHEKTYVAAAFPSACGKTNFAM LIPPKA FEGWKVTTVGD D IAWIRPGK  
DGQVRAINPEAGFFGVAPGTS AKSNPNAMATIRANTIFTNTALTPDGDVW WEGMTPNPPE  
GLIDWQGKPWDPSSGKPA AHPNARFTAPLYQCPSVDPEWENPEGVPIKAFIFGGRRSTVY  
PLVYQSFNWIYGVYLAATLGSETTAASTSAVGHVRRDPFAMLPFCGYNMASYFN YWLRFG  
RWSCNPPRIFGVNWRKDK EGNYLWPGFGENIRVLKWIVDRANNHGKA VESPIGWMPRYE  
DICWDGLEFSEEKWAELMSVERDAWMSEILSHEELFMKLYDRLPKELIFVKELMISSLWR  
APEHWEFAKVEISSYDD\*

>SPBIB\_v1\_270024|ID:27163431| conserved exported protein of unknown function [Uncultured spirochete bib]

MRVVYIIILIAAVIIAVIFAVQNSAPITVAFFGWSATASMSLVLVLT LGAGILIGMLLILV  
PSIWKRM RALS VQKKKTREFQKQKQKEDEKSSTPEAAQAENPSPEQNKGK\*

>SPBIB\_v1\_270025|ID:27163432| conserved protein of unknown function [Uncultured spirochete bib]

MDFLVASPKDMERRRLVPGSFD A VIVSGDAYVDHPSFGAALIGRWLEAHGYQVAILARPD  
PDDPEVFRMF GK PRLAFLVTAGALDSMVSSYTANKKPRSHDEYAPEGDRSLCLRADGTIG  
KSKLGRVNARPDRAAIVYSNL CRQAYKGVPIILGGIEASLRRLAHYDYWSDTVRRSVLLD  
AKADLLLYGMAERQILEVMEKLAQASKADSSTGHASGAVGTEVDLRGIRGTVWAVHASKF  
EQALAAAPQPGTEVLP AFEEIQPDSDEGRRAFARSFKIQYRNTDPWSAKRLIEPCGDRFV  
IQEPPEFPLSREELDKVYELPYQRAWHPMYDPFGGVPALTEVKFSLNSSRGCFGACSFCA  
LAFHEGRVVT SRSID SIVREAQSFAKMPDFKGYIHDVGGPTANFRAPACDKMAQKGACID  
RRCLAPTPCANLEVDHSEYRELLKRLRSLPGIKKVFIRSGIRFDYLM LDRDRGFFRDLVE  
HHISGQLKV APEHVSDRVL DLMGKPP IETFDRF AEEYSRLNQKFGKQQYLVPYFISGHPG  
ATLEDALELALYLKRFGFIPDQVQDFYPTPGTLSTAMWRTRMNPLDGTSVYIPRGTKERA  
LQRALLQFSKPENHEMVREALRMLGRTDLIGRGHECLVQP\*

>SPBIB\_v1\_270026|ID:27163433|nanA| N-acetylneuraminase 1 [Uncultured spirochete bib]

MVRNRKAASLAKGIFAALPTAFDQAGNVDEKALCFLVRNLLQKGVEGFYVGGSTGECFL  
SEAERKEVLEIVLDA AEGKVPVIAHVGMSTIVAVSLAQHAAACGASAVSATPPFYFSYN  
LDKIYSYADIAEASGLPVLVYNIPAFSGRNFGHNEIDRLLDIPGVAGLKHTSMNL YELE  
RIRVKNPDKILFSGYDEVFLPALVSGADGMIGSTVNLMP ELFLDIK KLFILGDIAAAQKL  
QAKVNSVIEALAGGLFPRRLNMRLALPGCPAANAESHFFQFLAKRWN\*

>SPBIB\_v1\_270027|ID:27163434| 3-oxoacyl-(Acyl-carrier-protein) reductase [Uncultured spirochete bib]

MSNERIEEDIFSVEGYIAVVTGGMGQLGRQFVKSLAERGAKVAIFARHAPDRASIKQVFA  
GLSERIIA VPDITK KETIKQGLSIVMNTWGIPHVLINNAGLDTQPSAPPEVSGPFENFP  
DEVFREVV E VNLVGTFLCCQVIGAEMAKAGRGSII NIGSIYGMLS PVQDIYAYKEAKTGI  
PFVKPVAYSASKSGVYNLTRYLATYWAAKGVRVNTLTPSGVWRSTQDPEFQANYCAKMPM  
KRMAREDEFNGAII FLASQASSYMTGSNLVIDGGWTAW\*

>SPBIB\_v1\_270028|ID:27163435| conserved membrane protein of unknown function [Uncultured spirochete bib]

MVQYLFNGFANLISSGSIFALFIGVFLGIIIGALPGLTATMGIAL LIPFTYGMNPAFALS  
LMIGIFAGGIYGG SISAILLKTGTPAAGATVLDGYPLAQKGQAGKALAI STIASALGGL  
IGALILTFLAPQIARIAVLF GPPEYVLLGAYGLTMISYVAGKSMAGIFMGLLGLL I STI  
GIDPISGFPRFTFGQLNLLSGLSLLPVLIGLFAAAQAFEGVEKHNEIQVKQVKITKIGIS  
GHEFIQILPHIIKSAFIGTFVGA VPGTGTDIAAFLSYGEAKRSSKHPEEFGTGRIE G VAA  
PESGNNACVNGAMIPMFTLGIPGEAATAVMLGGLMLLGLQPGPLL FKENPQVIYTVFAST  
ITSNLLILVLGLIGARFFAKVLQLPMKLITTLIFVLAIGSYAMRNNVFDVGVTHIAGFL  
GYILVKADYPVPPVLLGLLGPLVESNLGRTHIISEGNLLVFFTRPLCWLFWTLILYTHI  
SNILKSRKTKV KASSQEAKE\*

>SPBIB\_v1\_270029|ID:27163436| conserved membrane protein of unknown function [Uncultured spirochete bib]  
MVSFKVVKWLDLFLGLIGIALLIGVYILSESFPEPEHEAQLGASVFPRIVSALLAVVGIFIA  
LQSLKKKSNAELHIENAKMVFFTFILLLYGLLVKKAGFLILTPVFIHAVLLNIMKYSTII  
INLLTSILT TAGIYLVFKIFLSVPLPEGILGF\*

>SPBIB\_v1\_270030|ID:27163437| conserved exported protein of unknown function [Uncultured spirochete bib]  
MHKRIFGIILLMSFLVAMGISAQAKFPTKPIKIIVPWNAGGGTDAVARALARSGEKYLGV  
PVVVENKPGGSGAVGLAEVVQAAPDGYTLAILVELGFMDKTGVYVYPFCKDFTPIMNLNT  
DPAALTVKAGRFKSVQEFIAAYAKANPGKLVGHSGTGLLWHLAAAVFAKEAGITLTYVPF  
DGAAPAIAALIGNQIDA VTVSGAEVQSQVKAGELTMLACMGDKRLANFPQIPTLMELGYK  
VNISTFRGIGGPKGLPADRV TILHDAFKKMMEEPEFIETLNKMGLGIDYRSTADYKKLAD  
DTAAALEPVLTELGLLRKK\*

>SPBIB\_v1\_270031|ID:27163438| Dihydrodipicolinate synthase [Uncultured spirochete bib]  
MKKGKKFSGIIPPIVTPFDESIGNDR TIFRREVRHLISCGVHGLSPGGSTGEGAALTDEE  
LAELIGIIREENTEGLPIVAGVIRTSTQAAVKTALA AKAAGANALMVTPVFYNVLPDEK  
GNYSFYEAIAEAADLPVYIYVQNEITPD AFSRLNIPNVIGIKQSVGGIMAFYDMVL  
TNGDRGMIYSATDEM LYSTFDLGADGAISAILSLFPKLCVKMWNLAKDGDNAKARHIQDA  
IYPVWKA VRGPQFPARMKAALKILGRDCGFSRSPMSEVTESQVAQMKLLLENIRDE\*

>SPBIB\_v1\_270032|ID:27163439|dapA| 4-hydroxy-tetrahydrodipicolinate synthase [Uncultured spirochete bib]  
MVKDFGRILLPLITPFDKNEEV DYDKYKQLARYALEKNYCD SIIVTGTGTFEINTLSFDER  
VNLLAALEAVDVGKVPVIAGVGC ASTRETV ALAQA EKLGA DCLMVVAPFYCKPTQDAVY  
AHFKA VHDATNISILLYNIPIFTGINMEPALVGKLAALSRIIGIKDEAGLNPIQITDYLL  
ATKQIKPGFLLYNGDDLMLMPTIPQGAIGIVSGGAHLVGDRIKVF DL YEAGKNAEATEV  
YRDIFRLFRGFGVNGRVHPNPMLRAAIEIVTGIQVGP RRPLDPITSSEREFLIALLKEV  
KLI\*

>SPBIB\_v1\_270033|ID:27163440| GntR domain protein [Uncultured spirochete bib]  
LNQKIRKIERVSITDQVVKQLQALIMSGEFKIGDKLPTENDFCAQFGVGRSTVREALRVL  
AAMGMIQIQAGKGAYVTKDKD NSFD AIKYWFAEKHAELSELIEVRMGIEPLA VRLAIQRA  
SPESIKIQEIHQAFKLA AIRKDHIELATLDES FHNAI IQASGNLLIKIGKLIADSMME  
FRARSFAVIENINHATIPHEKIVEAILKK DERAGTLAMIKHLEISKHDMEQVAHEIEKT\*

>SPBIB\_v1\_270034|ID:27163441|dapA| 4-hydroxy-tetrahydrodipicolinate synthase [Uncultured spirochete bib]  
MLQKEKYGKRLVPIVTPFKNDMSVDYDAIVKIG EILLKR DYADS FVLTGTTGEFFTMTSD  
ERIKIFETMKEAFGARIQLIPHTGAASTQE AIALTRKAKELGFDL VMVVAPYYTKPSQKE  
IINHFSLIADVVDIDIMLYNIPIFTGVNIEPE SLRELSKKSNIVAIKEEAELRPKQISEY  
LLATPEDFIVYCGDDTMVLEAL AQGGNRIGGFISGGCHLFGDRM KKM INFLSGNVLEAG  
RIQLELLPLL RSLGQNGRTNPVCLLKGAMAMVGYPSCLPRLPLTPATDDEM I K V K SIMVR  
IGLI\*

>SPBIB\_v1\_270035|ID:27163442| protein of unknown function [Uncultured spirochete bib]  
MKNAHVKLRTSREFPTISIDDAFKINRNFEKRRNDKTVA VSWWCYAVL DLGLRQPGYCS  
S\*

>SPBIB\_v1\_270036|ID:27163443| protein of unknown function [Uncultured spirochete bib]  
MRLSVGVDLHKTQFTVYWRREGDSEGRF AQYLTNEEGYCCFEELEK AFEQGHEVA VVVE  
CTGNARYFKNRVEKCGVRV VIVNTLKFV VNESVRKTD RHDAA TLAEFLEK GMLPEARLC  
SQHSEELRRMLKERSSSLVRTIVSVKNQIHGLLLCLGIESTRAGLQSQKEHRLIQDILAAH  
GYVGGAVDPLFDILDRLDEEVK KLGLIAELTADNPV VQLIRTIPGAGVINAATL RAYID  
DISRFTTPRQLAAFASVVP\*

>SPBIB\_v1\_270037|ID:27163444| protein of unknown function [Uncultured spirochete bib]  
MVQVVLGMVRQKRWTGRYRLIVRYDRM KKAKGSGRSIIA VARALSEILWHMLTQNEPFDE  
AKMIDPKIRRKAVEMQAAAFDVVA\*

>SPBIB\_v1\_270038|ID:27163445| TRAP dicarboxylate transporter, DctP subunit [Uncultured spirochete bib]  
MKNWKKLLVIVVLFCVVDLLAEQPIVFKLAFTDP PYL KIGDLQVMHHSYAGMVAFKSA  
LEKLSGRIVVELYPYGR LGD ANENIQIFSGTLQGATPADGAVAPFYKDIQVFSIPYAF  
GSALEAYNLWDGVPVKALFDNMAKV SGLRVLAIYDNGGFRSFSNNKKPIKTAADMKGLKI  
RTMTIPVHMEMVKALGASPTPIAWLELYNALQ TG VVDGQENSAATILGGSLQEVQKYYTL  
DEHFLGSAMIVTSEKWLKSLPPDLQTAIQAGKIAEYAARGTSRANDSLALALQKAGVQ

IYYPTSAEIAATFKAASQQPVIDWLKKNINPSTVDTVLSALK\*

>SPBIB\_v1\_270039|ID:27163446| putative C4-dicarboxylate transport system permease small protein [Uncultured spirochete bib]

MRTEKGIFAFIEKIITYITDILMAANIILILLSVFFRYVLGHALVWSEELAKFILVWTVF  
LGASNAIRRWENLRVTFILDKLHLNASRVFDMVLKAVASGFIAFLFILALKSIPNVWSRE  
MAPALGINMVIPELGIIVGLALMVLQICIGLIISFFMRSNL\*

>SPBIB\_v1\_270040|ID:27163447| TRAP dicarboxylate transporter, DctM subunit [Uncultured spirochete bib]

MTAFWISTLGLIIFITLGMPIAFSIGMASVGFILMTNPMMLVIVPLRMFSGVNSFTLLAL  
PFFVMSAEIMVRGGVSSRLFALVNMLVGRVRGGLAYVNVVQSTIFGSISGAALSDVAALG  
KMEIDAMVENGYDRDFSCALTAASSIQSPLIPSSSTAILYAGIMSMSVGGVLLGGLVPGL  
LIGGTQCLYILFRGRKLNLPKVTLTYDRKTKAKIWRDGLVALGMPAILIGIVGGVFTPT  
EAAAVAVFYSLIAAFLIYREAKPKDIIIEALEATVKTSATLFMIVALAASYSWALGSRIP  
EQIATFILGISHNRYILLIMNVLLIIVGMWMETGAAIILFAPILGPIATMAGVSPLHFA  
VIMIVNLVIGLITPPVGVVLYATCTVGQTTLERLVKALKPFYILSFSCLLLITFVPDIAL  
FVPRLVGLVK\*

>SPBIB\_v1\_270041|ID:27163448| 3-dehydroquininate synthase [Uncultured spirochete bib]

MRNGNPYLGGGRYIQIEGAVHLVGQELKRYKAKRAFIIGGHTALSIALSPIETSIKSERI  
DYLVEEFQGHCTLKKVASLREKAERFDADIIVGVGGGKALDTAKLLANDMNLSVITVPTS  
AATCAAFAILSVVYNDNGDVLYSVFHNREVASVLVDMEILTSHCPTRMLAAGIADALAKF  
PEIAFSMEYASDWEKTVLPSAALVLSKHNWDLFFQKGGKKALEDAGTKLSPELEDVVCAG  
IALTGTVSSLVSGGRQLAVAHSFYDSICKNFKQQQRKFLHGEIVSAGILLQMLVNGMESA  
QIDETRNFSSIGTPVSLRDLIDIEPTSFNIDAIYTYIRTTMNLLEGWMTERLRAGLNGLL  
SL\*

>SPBIB\_v1\_270042|ID:27163449| Electron transfer flavoprotein subunit alpha (modular protein) [Uncultured spirochete bib]

VHIIVTIKQVPETDKVKMDPETGTMVRSGLSIVNPLDLYAIEEALVLKERFGARITVLS  
MGPPDAERALREALSMGCDEAVLLTDRVFAAGSDTWATSRVLAEAVKKIGAFEIILAGERA  
TDGDTGQVGPALAAWLGIPVISYASGLELFADLGSAGAEEKGGVFPFAPSTVRARRLTEEGY  
QILETEMPCLITVVKEIASPRLPTLRGKKFARSAQVLRWGARELGLGTEDAGLPGSPTRV  
TKIFYPKVSRDGERLVARDEEGIARAVNRIFALLEEKGCLSSVPEAALATAHQERTSLYS  
KASTTHENLERASLDQEAARNHSAAKLSPTEPSAAELSASSPGAAKSAVPKPEVWIIAER  
RHVGLDSVSFELLARARTLADALHTSLAAIVVAPSLADEEVQALIAYGADSVIALESNLF  
DDFVCETWADALFALARERKPDIVLAAATTTGRTLMPYLA AKFGTGLTADCTELAIEEGT  
GLLLQTRPAIGGNIMATIKTPKHKPMATVRPHSAQPLSPDFERKGI VLR TQALQPAESR  
AGTQQIAVRTRVLSMERNTKGFENLEGARMVVSGGRGLKKAENFKLVRELADALGAVVGA  
SREAVDRGWISYPHQVGLSGKTISPEIYLCAGISGAIQHLAGIRTA KTIISINSDPEAPI  
HAVADLAVVGD LFEILPRLAERVRS AKTGISTEGNHAL\*

>SPBIB\_v1\_270043|ID:27163450| FAD linked oxidase domain protein [Uncultured spirochete bib]

MLYNRVTEEIIRELAVIAGARNVLLDPAKLEAYSHDETSKEEYAHMPEVVVTPESTVAVA  
AIVKLANRAHIPLTPRGAGSGLSGGAIPVFGGIVISLEKMNHVREIDYENLTMTVETGIV  
TNEINNLVKDKGLFYAGYPMSLETCMLGGNIAENAGGGKAIKYGVTSRYILGLEFVTPAG  
DIVWLGGKLA KDVTGYDLVHLIVGSEGTLGIATAAIIKLI GLPAAKSDLLV LFRSPQEAI  
SCVPVILSKGLIPTAIEFMDRRSVETS CAYLNENLPYAQCGAMLLIEMDGRDPALVESEA  
EAVGDL CMEQGAIEVYVADNRTTQERLWAI RRNIAEAFK VYCPVQSLEDIVVPPASIPAV  
IPELDRIAAQFGITIPCYGHAGDGNLHATLVKDPEMSMEDWHRIEPQALEALYEAISKLG  
GKISGEHGIGLKRKEYMKRFMSPVELELLKAIKRA WDPNLMNP GKMF DLEKIG\*

>SPBIB\_v1\_270044|ID:27163451| exported protein of unknown function [Uncultured spirochete bib]

MKGLKMEASGVFRSSARLRALMLLAVLFMFAPSAQPVHAQDVLSIQQWSFFADTAGERI  
SGPGQHVSIGLIGGLTPRLELD FSAVTMLTPKPGD SLLGAVSLGYSLLAERWINDRVPPN  
WVSM LAEIGFLGGGTELWARGFSGATPKAQVFVRFTPLVLGNSFYRRRDRL LALGFAYDL  
LKQRGSFFFNFFAIDASLRR\*

>SPBIB\_v1\_270045|ID:27163452| exported protein of unknown function [Uncultured spirochete bib]

MERLLNMKHS MRFVIFIMLCYVAASSGMVYAAEPWHV GIVVGTEGFAAKGFDNGEYMRA  
GLLFDPPFKGIQPAWFLGALVPVNPLDFSG LMLNIGIELRYMARTAHSSFFVREWKYAP

AVSAEMLIDPAGGREVGFVVS AQLVRFWFGESYVSFLGTELVLDSKGLVSGWGASLIRLT  
AFVH\*

>SPBIB\_v1\_270046|ID:27163453| exported protein of unknown function [Uncultured spirochete bib]  
MQKNYSPMLRGMFPYRFAFGVLALLATISAMVILGGCATSQGAGSLANSIGLVNSVSLA  
NSGADSTQSIEAFLESNGFSRIQTNEPIIHYSAESWKASLLNTIAQAKKSVFVLVFLANR  
NEFNAEIYDALIAKAAEGVPVYFLDATS YERIFHNPKWNDEIVAPSEVFRGTVKWAEF  
NPLRLERIAALPWLLVRDHRKIVMVDGETIYAGGYNLNIYSFAPLDQNGNEDAMVEIQSP  
DAGRALAPSLAETWNQFSVESLNLEDIAPAVATGAGGSIGATAAASPEASAGSQTASMDS  
TTSQDTPLACPPNANKGAVNAWLGNQVIGETRSEALYRAIFDYAQEEVWL VQAFAMPT  
TIMQMVKQALQRGIQVNIMLSDDQIS PAMDKAVHYTVLPLEAGAHVFIYKSAGNALLHY  
KLAMMDRKIVALGSPNFNYRSVRLSNEIVFVFDNERTIGVVSQNLSELQKRARPVSIEEA  
QKWRGFSYFMSYLLSVPGG\*

>SPBIB\_v1\_270047|ID:27163454| putative dTDP-4-dehydrorhamnose reductase [Uncultured spirochete bib]  
MCRIASIYTSEKGRFAQGRRALAGLEAEGGAGWRFFLQNTCEGIFISMKLLVTGASGLLG  
RSLMKLLASYPNIETKGVAFSRAKAPLEKLDL TEERSVALFFAHFRPDVVIHLAERRPD  
IVDTDLERARAINIDATQIIARECAKRGVFLLLISTDYVFDGSAPPYFPNSPVHPLNEYG  
RMKVEAEKVAETALSGIVRAFGGRSVGAVLRIPILYGPVEYLEESSVTEIALALKSTEPR  
NIEHWAHRYPAHVDDVSTAIMAIVEACMQRTAACGPFPRFLLSGKEAYTKYEMAKAMAAA  
LGIDASHIRPDPSPPKGAPRPRDCRMDTSLLESLGWRQEKYFSSSIGDIKPPFS\*

>SPBIB\_v1\_270048|ID:27163455|pdxS| Pyridoxal biosynthesis lyase PdxS [Uncultured spirochete bib]  
MEQNFWSSRQSEQWRIKVGLAEMLKGGVIMDVTNAAQAKIAEKAGACAVMALERPADIR  
AQQGVARMSDPKIIKEIQDAVSIPVMAKCRIGHFVEAQILEALGVDFIDESEVLT PADDR  
FHVYKHNFKVPFVCGCRDLGEALRRIGEGAAMIRTKGEAGTGDII EAVRHMRTVRDEIAR  
LTRLPDEELMTAAKELGAPFELVWEVAKTGKLPVPNFSAGGVATPADAALMMQLGAESVF  
VGS GIFKSGNPERRATAIVSAVVHYKDPKILAEISED LG EPMVGIGLDELNENQRIAGRG  
W\*

>SPBIB\_v1\_270049|ID:27163456|pdxT| Glutamine amidotransferase subunit PdxT [Uncultured spirochete bib]  
VSSSRIGV LALQGDYEAHLKALARASENAVETIEVRRPADLESIAALIIPGGESTVMGML  
LERFGMFELLSRIANGMPVFATCAGIILLAKNIEASEQTRLGVLDVTVRRNAYGRQVDS  
FHAPVQTTIPEIGTIDGVFIRAPKIIALGPGVEVLAVYQGD PVMVRQGNIVAATFHPELL  
PGAPVHRWFIQSF\*

>SPBIB\_v1\_270050|ID:27163457| conserved membrane protein of unknown function [Uncultured spirochete bib]  
MPTEFLVLLLILLNGFFSLSEMALVSSRKARLKSEADK GKSA YQLAFKTRESPSRYLST  
IQVAITLIGILTGTVSGTTISQRLAAWLATFP ALEKYAASISIAVVVLAITFLSVIIGEL  
VPKSIALHNPEQIAAFTIRPMHFLSVLFFPVVRLLSAATDGLVRLMGFHRAAESAITPEE  
VKILVEQGEESGVFETAEREMVEGVNLDDRRVTMFMTPRTDVVALD TADSREAHVRAII  
EHA EFGYLPVVEGDLHAIGMLEVKRALTRLAQGRFAGIRECMQS AVMIPESFSGLQALG  
ILKNAKKSAGLIVDEYGGVSGLVTIGDLLEV VANLSEIEQQEEPQIFKRS DGSYLVDGSM  
PIDFAEALELNVEQFSREYD TVAGFVLHRTGTIPKAGDTIEWPPLSIEVVDMDGKRID  
KVLVKKTE\*

>SPBIB\_v1\_270051|ID:27163458| exported protein of unknown function [Uncultured spirochete bib]  
MKPPKSALEGLYILLLL FVLALIHFPQTLGAQENEPARDPVTASFDQAFADGDPVRNV  
IEPVFVGEAGFVQRLNIRTRSGTQGSPTDAQASVHPPLGLVLSGGSARAYAHIGVLKEL  
EKAGIYPDFIVANSMGAIIGMLYAAGFSPDDIQLLIHAIP LDSYFDIVLPTNNGGFINT  
FAAAMRMLVGNLDISETAIIPIVTAEDLPSRRQIWF AEGSFERIMTAAFSMPAVFEPQHV  
GNFILIDGGIAAIVPIEPAQRFTDRLIVSTALYNRAMSFSNPLTVVNRAIDIGKTRTSMG  
ALEKTSAFIIRNDVETLSYMQFSDPNLIARGEESAARAIAALDAQERAQLENPPPSLV  
ELRARMHQKLIK TIEALRTGVMPASAPTIRAAPALRLFPPI LGFAGETETIPRAGLSAVF  
SAWRKTSLSYFAAIAPETGKQWALDGSININPIEALVIGASARLWGDYSSTAILGHTPA  
MWEFAGSLKSATFVGATKIGFVASADVIREIGEGSATWQSIGLVSAASVTPGFDQDAHAI  
VPWYSLEAGGFAENTVSAQLSAGLEGLMIGLHAGLFSRVRGFAKVALNGNAFLESEFD  
GFRGGAARAAAASSLITNAELAIAPRSLFFDIAETALVRNLELAPFFDTKWSAPAGGAGS  
FAMKDWAAGLCFSFQASAFGLPATISAYASYSGSHVFTFQVRAGALFPSR\*

>SPBIB\_v1\_270052|ID:27163459| conserved membrane protein of unknown function [Uncultured spirochete bib]

MKTWKVALLAALAIIVAGPVLAQNAVKGVTDDVHAEKGFDFSVLGGIGYGWRGFGMSGGV  
EYIFQKFDIPGFPLTMGVMGLAGLDFGSGFDVSAAGMATLHWGLKAYKDFPEFLRKFDWY  
MGLGLGVGIIPFGFGMSSGGGVSYYVNEKLALDLSFYVNHVGGASGVGGTIGIRYKL\*  
>SPBIB\_v1\_270053|ID:27163460| DNA-3-methyladenine glycosylase I [Uncultured spirochete bib]  
MNRCPWCGSDPLYLRYHDEEWGVPVHNERTHFELLETQQAGLSWRTILGKREAYRAAF  
AYFDPEKVARFSGPEIERFLADPSLIRNRRKLEAAVANARAFLNIQERYGSFDAWIWRFV  
EGRPILNTWKDICELPARTPLSDLISNEMKKAGFAFVGSVTIYAHLQAIGVNDHLVSCF  
RHEEIARLAASSAPG\*

>SPBIB\_v1\_270054|ID:27163461| Ferroxidase [Uncultured spirochete bib]  
MLSQK MIDRINLQINREMYSAYLYLAMAARMNEAGYTGIGKWLTVQYHEEMFHAMKFAKY  
LHDQNATVAYTKIDTPEFKEKDVKSLFQHVLAHEQSVTASIREIMDLAIAEKDYATQALA  
QWYINEQIEEEKNDTQILQNIDLLGNSAQQGLFMLNIELGKRDPSPVPLDFNKI\*

>SPBIB\_v1\_270055|ID:27163462|thrC| Threonine synthase [Uncultured spirochete bib]  
MVIRYTSTRNGRVNASIAEAIQVQGMPPQDGGFVVPVQIPALPPEALNEPGLSYAELAWLVL  
APWFDWSEYELRPLIERAYIAQNAPGGEALFDVPEIVPLRAAGSLGNHPLFLELFGHGT  
CAFKDLALSLLGRLLQESLEKCDIDEPLLILTATSGDTGSAALAGLGGQPGIRIAVIYPA  
EGTSEIQQLQMTSVPVEGRLVVGRLGNFDDAQRVAVKRIFQIAGNPDPFHAIKSSANSI  
NIGRLLPQIVYYVKAWRELYFSRFLRQGEFDDVVPVSGNFGDILAARYAKAMGLPIGKLV  
CASNSNRILHDFSTGVYDRRREFTKTLSPSMDILVSSNLERLLYHALEENPELVAMTMQ  
KFERKGVFELSEKNRATIADFRASWADDAQTLETIRSMWESHGLLVDPHTAVACKVARDV  
YTKGTEVSGETDTSAPIVVAATASPFKFPAAACLEALQGKKGPTSEKGGKDLQLAFELSRLT  
GLPVPKPIAALVSAKINHSTIIDESDLERVLTEFAQQEAGIARIL\*

>SPBIB\_v1\_270056|ID:27163463| putative Homoserine kinase [Uncultured spirochete bib]  
MIEIEVPATSANIGPGFDCLGIALSLSNTVRVEKASETRLKGCPPQWAGPDNLFRLSRFQ  
ACALLQTSVPEIEVEFITRIPPARGLGSSASLAVAGAAAALLLYAQPKAGTELDILKEQK  
NQHLLLKAATAVEGHPDNAAPAIYGGFTAAAIKEDISIIRADAPAEWRFAACIPDFDLE  
TSVARKALPDVYSRADVVHAISHAVLTALAIRNADISSLGRVCELDRIHEPYRRPLVPDFE  
DVENACRANGAAAVWLSGSGPTILAVFESSVPAKSLASDIAAHAKRRWQVVPPLHADNMGL  
RAQISP\*

>SPBIB\_v1\_270057|ID:27163464| putative Methylated-DNA--[protein]-cysteine S-methyltransferase [Uncultured spirochete bib]  
MIPIQWKETQAFSTSVPTRFGSIVVVWQGEAPILSRIYLPRNDCALVSQAHTDFPILEQ  
WNDRRLLPDLISRATEAICAAAESKPAQFPFKLLRPLQYLNFRQTILSLEASIPFGHV  
STYLELAKASGKPSAFRAVASALSHNPFLLIPCHRVIASNGSLAGYQGGLEMKRFLER  
EGVPFSSSGMVNLHLARLWHFS\*

>SPBIB\_v1\_270058|ID:27163465| conserved protein of unknown function [Uncultured spirochete bib]  
LKWQPACSILNNMNKALSPIVMPALFVGHGLAINAALNNDFTESLRLRTRLPSPDAIAV  
ISAHWSTPEVRVTSSPFKQIFDSIEFQEELYAISYAPPKPDADTICSLLLTAGINAK  
SDSTRGIDYGAWGILVHLFPEAQIPVVEISLSYHIDTKKIVNVGKALQRLNERILLIGS  
GALVQNLKISKNIKAKPYPWALEADRKIAAIIQAGDASALSEFALRNRLERSPAMPTPEH  
ILPAIAILAMKEKDDRISFFHESFQNASISMRSFIIHGH\*

>SPBIB\_v1\_270059|ID:27163466| conserved protein of unknown function [Uncultured spirochete bib]  
MHFHFCPNPACAYHQHAPKERWFVAAGFYVTKTFGKVQRFRCSFCGKYFSTQTFSLDYF  
AKRXX

>SPBIB\_v1\_280001|ID:27163467|gidB| Ribosomal RNA small subunit methyltransferase G [Uncultured spirochete bib]  
MNHEPLLARGLAALDFDISSGILDKLIQYLDEIERWNPLYGLVSAEGEDLVIKHVLDLSL  
PWRVLAELLASLDSSIARNGMATVIDIGTGAGFPGIPLAIAFPERPFVLIERLEKRVRF  
ESAITLLGLSNVEIRQGTAEENEQAFQCVVFRALRPFQDCKLFRSIWKKIQPGGALFAYK  
GRLMHARLELAELSEDAVLGNLAARAQIVSVWVPFLEEERCVVIARKA\*

>SPBIB\_v1\_280002|ID:27163468|pyrG| CTP synthetase [Uncultured spirochete bib]  
MRKLLFVTGGVCSSLGKGAASSIGALMEARGFSVQMVKIDPYLNVDAAGTMSQYQHGEVY  
VTDDGAETDLDLGNYGRFTTAKLSRANSITGQVYKAVIEKERAGEYLGRVQVVPHTN  
EIKQRILAVASNPEVDMTIVEIGGTVDIESVPFLEACRQLIHEYGKQNAVSIHVTLVPA

VSGGEIKTKPTQHAVKELQEVGIQPDALILRSAPLSDDVRRKISLFTNVEEEGVISGYD  
APTIYEVPLAFYNQKLDTFLLRKMNVESRHAELGKWQAVVQAVTKPSRKVKIAVVGKMYD  
LHDSYKSIWEALCHGGIAHNAGLEIEKVDSSRLEDSNADLEAIFKGIHGILVPGGFGERG  
IEGMIRAARYARENKIPYLGICLGMQIMVIEYARSVIGWQDAHSTEFNKATPHPVVCLLE  
EQTRIKNYGGTMRLGAYEAVTKAGSFIRAA YGTEQISERHRHRYEVNNDIRQELEAHNLT  
ISATTPNGELVEACEWPEHPWSVGVQFHPEFKSRPTSPHPLFKEFIRAALSHAGA\*

>SPBIB\_v1\_280003|ID:27163469| exported protein of unknown function [Uncultured spirochete bib]  
MAGNARAWKTFARSNARAFCALCLLSLCSMVLLACSPPAEDVTQSAQAEAPDARFSDLTR  
DEYRNGKHSRITAQIATWYEPDQRLEIEHLAFTAFNTDDGSISASGEAEKATFYESSGD  
IEFSGYVHLKSAEGDISFKTDHLAYKRALDIFETPLSDVTINAKNQLFMAGRGLLFDVK  
QKYEIRESVSGSVYQ\*

>SPBIB\_v1\_280004|ID:27163470| exported protein of unknown function [Uncultured spirochete bib]  
MKFANQYPVPFINKMEYYSIMKTRAPFWLLIIVMIFTAFQAGFAQASKPAASAQPTAPAS  
SQQAPAPSQPAAPSGSPQPAASQTTEGKKPITFSARSVQGVLAAGKENTILTGSVKITG  
SLVITADRVELSGEDYVNVVCSGNVANDSEKGFSLVAEKLNYQRDSEIGIAQGVAVND  
TKNNTVINAEWVRFQKQSIFEAAVSVLVLKEDMSIRAEYAHYNRDTEEIRLHGGAVAIT  
ETGQLQGDITASSDWSNLQISGEVSGNITSKEKTATQ\*

>SPBIB\_v1\_280005|ID:27163471|lptB| putative lipopolysaccharide transport protein B: ATP-binding component of  
ABC superfamily [Uncultured spirochete bib]  
MSIAILEAAHLRKSFGKRLAVADVFSMQTGEVIGLLGPNAGKTTVFYMIAGFLKPSAG  
TVHFDRKPIDRLPMFKRAMLGISYLPQEASIFRRMTVEENILAVLEARSSLSPAGRREKA  
RMLMEEFGIQHVAKQPAYTLGGERRRTEIARALAIEPKFLLLDEPFTGIDPIAIREIKH  
LIQSLSSKIGILLTDHNVRDALAITTRAYIISKGVIVAQGEQSIIDDPLARETYLGQD  
FEM\*

>SPBIB\_v1\_280006|ID:27163472| Hydrolase, TatD family [Uncultured spirochete bib]  
MRYFDTHAHIGLIYDDPIEQLLVCQQAQKLAGVSRIVSICNSLVDFKQVYENLKPAEHVYH  
AVGVSPSEVNNPGKDWQRYIEEATRLPRVIAIGEIGLDYYHKFGDKRSQIELFIDQLEIA  
ARLNLPVIIHNREAGHDVLDILRDRIPPAGAVLHCYSENAAYAADILDGLDVYFSFAGN  
LTYRNARNLHETVAFLPLDRILLESEAPFMVPAEFRNKRNMPEYLPSTAQFLADFLNIDV  
EEVAETTYQNACRFFRLNP\*

>SPBIB\_v1\_280007|ID:27163473|dus| putative tRNA-dihydrouridine synthase [Uncultured spirochete bib]  
MSTKKMPPFLLEKQWLAPYFLAPVAGYSDVAFRAICAEMGAALCYTEMVSAEALVRNHA  
KTKELLARDPAETHYAIQLFGANPATLAKAAEIVSAFQPAVIDLNCGCPVPKIIKAGAGS  
ALLKTPERIGEIVRAMRNATSVPISVKIRTGWDEKSINYLETAGMAIEAGACAITLHGRT  
RAQGYSGKADWDAIKALAAQTSVPIFGSGDVFSADDAIAMQEYTGCDGVMARGAIGNPF  
IFQELCQRAAGQRIDEALSPKVVSQTALHLELAVKYLGEQTACIEFRKHFCAYTKGFVG  
GAALRAQAVRCSTFVEFQRLLELFAESAA\*

>SPBIB\_v1\_280008|ID:27163474| protein of unknown function [Uncultured spirochete bib]  
MKREGFFRGVQACVGAMALCVLVLFNNSCNQSPQSALIWTDIPELVVAAQLFNRENDQFAV  
DVEYKENAATALMKTNKPPSLIIAKFLLSKPVIRKLDPLDDLFSRYVDPNDMYSALLDA  
GKQGVQQILLPVSFDCMVLVERKSDSLGAGASMLDLDAIREAGDKFTRTEKGVLSAMGFS  
SVWNMEFAESWLLAQDAGFSPNPWKQTSVPKSGDAKTWPLLWPKDRLEQSVLALNSLDS  
KVKKDDADAFASYFNKPGYQLVLENRVLFWPMKASDFFKLPYSAKSRLRYRYPANQKL  
ILTEGTRYLGVKGAAGKKAFAFSKWLLTPANQEKIWKEMETQRLLPDHVGPLDGFSSL  
KQTNETVLSRYFPEYAQNKIVAGTLRSPVALPDYWDSFSRDFFWWLKTMMLTSGEGTESD  
AQKGTIGEDFQASFEQYLGTMPTDWLASSR\*

>SPBIB\_v1\_280009|ID:27163475| Radical SAM protein [Uncultured spirochete bib]  
VQANQKNSKPLINWHSRDLKERYGEHVWRLGIDAGFSCPHRSPDRLKGGCRFCAPDGNIA  
AYQKAASSVPSVAQQIERALVFTRRRYHANAFFLYFQAYSCTNAPVKALAAIYDNAIDAF  
WMALERITPLERDGLNFAQKGENAASTSFLTSTSPKGLVVSTRPDCFDSEKAALLASYR  
ERGMEVWVELGLQSAHEETLLFIRRGHGVKEFLDAMEIAGKAHLRRAVHMLGLPGESH  
MMLETARIVANTGTEGVKFDHDFRIAKGSFAFAFPCGEITAMHPSRLPGLLADCLEVLPP  
STEIRISADFRPEEAINIHAPLDKHHLARLVEDELRRRSCQGQRFNTSP\*

>SPBIB\_v1\_280010|ID:27163476| DNA polymerase III, gamma and tau subunit [Uncultured spirochete bib]

VPQSAWLYALCLLYPSPSCYFSYMPFEVTAATRKRPQNFEQLAGQNFVAATLISSLEQGR  
IAHAYLFSGPRGCGKTSTARILAKALNCEHGPTPHPCGTCASCLSISSGSSLDVIEIDGA  
SNTSVDNIRQIKDEVLFAPNSGRYKIYIIDEVHMLSMSAFNALLKTIEPPPYIVFIFAT  
TEPHKVPATIKSRCQQFNRLVPAETILELLRQAAAETGVETEEALLWIAREAAGSVRD  
AYTLFDQIASFSGTKITAQNIRDTLGLVGLDRLNALFRAIVANDTKAAFTTLDEILIRGV  
SPEQFLSDAVDYCRSILLIHNDIQKEGLLCAPRSTFDADVLGVLTKERAEYAIAVLLDTY  
RHLKETIDPRFELELAIAKLSRISAYISQSELFDAIKAIKHTFLPQGSSQKGLPLPFQER  
ASKNDSAEAPLLRDLRSRQPESQSAQSARQTSRPSQPETLAQKNNSQYSSPLDQEKPS  
VQLSASRSGTEVEPASSVSSPSELRKRIIAKLRAENLFLASALEKSGEWIPKHNGFIIP  
VVNKVELDLISRFSALIASTGAQLMGAPCAIEAHLQKLQEVLDHEDSPKKSALMRDSETG  
NAHAQISSDEVPHDQTPETNLLKEKSTLSSFQSAEDAFNGSDEGSLPQNNPAPSSLDE  
NDIRLIELVRKMFKGKVIETKPAFEPESAESRTSAHASVPIIEPPDIPEEPEEFPDTEE  
ESYD\*

>SPBIB\_v1\_280011|ID:27163477| Nucleoid-associated protein Spica\_0202 [Uncultured spirochete bib]  
MDLSNIFDMLKNPQALKAQAEEMQKKMNAIRATGQAGGGMVKITLSGNMEMLECEISPEL  
SEFKDIPLQLDLIRAAHNAAEKIKEEIQNEFAGSLGGFGSGMPFGNLPNGFSGTEV\*

>SPBIB\_v1\_280012|ID:27163478|recR| gap repair protein [Uncultured spirochete bib]  
MKAIEDLVSLTRLPGIGRKSALRIAYSLKSDIAFSEALADHIRTLRSTIHFCACGCSY  
AESELCQVCSASRDRSIMCVVEQPQDVITIEASKEYKGLYHVLGGLSPLEGVGPDKLN  
IGKLIQRIHSSISTSVPIREIIATNPTIEGDTTALYLKLLLEKEPVKVTRLATGIPVGG  
DLEYADRLTLARSFHGRSAL\*

>SPBIB\_v1\_280013|ID:27163479| conserved protein of unknown function [Uncultured spirochete bib]  
MRASAIHVLNAEVITCQELADDLEIITACGSDMMSDVIAFVKDRVALLTGLTNPQVIRT  
AELMDIRLIIFVRGKKPSSEMIQMAKEQSIMLMSTQDSMFIACGKLYQAGIMGDIAYQAR  
\*

>SPBIB\_v1\_280014|ID:27163480| Anti-sigma regulator [Uncultured spirochete bib]  
VLIEYIIPRMDFSAAGKASTDMKRRLTQLGLPVALIKRIAIAMYEAMNVIAIHGDGGKAE  
VEILEDICISTRFTDKGPGIADIELAMQEGFSTASEEIRNMGFGAGMGLPNMKRNADELII  
QSEPGRGTTVIMRFLQTGEL\*

>SPBIB\_v1\_280015|ID:27163481| Fe-S cluster domain protein [Uncultured spirochete bib]  
VNNKTLQNQENNIRTFHVSQLDADLCVGCTTCIKFCPTKAIRVRDGKAKIFEDRCIDCGE  
CIRRCPKGAKKAISDPLFILDGYDLKVALPAPSLYAQFGTRYSDIFAALHHMGFDEVF  
DVAWGAIVATEITRSILAKPGPAPRISSACPVIVRLIQQRFPPLIPNLMPILPPSEIAAR  
EARKRLSEISRKIGIFLSPCTAKVTAVRMPLGYSQSSIDAVISFSDIFLPLKRALEERK  
PLSPKKGFKSSVPQASSGHSPILPMDNLEPGMGWARS DGELDALRIPDSVSVDGISNVI  
DLFEAIENGNIESIQYIEALACPGGC VGGPMAVENPHIARSNMRQRCQKDNLAAEASSP  
MKAIKPPSPKLPEQEELPSYIWTEQVSPKPVLVLDADLSKALEMAEKIDTIHAQLPGIDC  
GACGAPDCDCLAEDIVRGFASIEDCRLLEHPYSKGTKENIHSEGLST\*

>SPBIB\_v1\_280016|ID:27163482| conserved protein of unknown function [Uncultured spirochete bib]  
LNKKDFPHIHFYDQDFVDIYDRTWAWIADCWTNGGSQTKIGKIKFFYYPEKKKLDLFLEQV  
FSSFFLVYSNRIYSANGLDALYALQEPDGAIRTA YDIETGQAVMPADNPLGVTLPLLAW  
AEFNLYHKTANKKR VKEVMPALSKHYKWLEANFKMPNGLFATPLSSTGMDNSPRENARYF  
IDFNAIAMNALYLSALGDILNDKDASFLYKRDYFSIKTRINSKMWNADDGFYYDLDENE  
NQVKTKTIGTYWILLAEIPNEERA EKLVAKLKDPHCFGTENPFPSLSADHPAFDRKGQGF  
RGSVFPWLT F MVIKGLEKYFYELARDSAIRHLYYILDSMHASDHESNRHHSRPTVWSAY  
QPMNEGKAIWDEHPDWPLPNHFPSNGLSTVTLIENIVGLYISLPRKTVDWIIPNLEVMG  
IENLSLKRNMITILSSKSGRGWEIHMESEKLYYFTINVLGKKKKTLPIPSGKCSMLIDKI  
\*

>SPBIB\_v1\_280017|ID:27163483| protein of unknown function [Uncultured spirochete bib]  
MSRERRDRSARERNSHDQGFADPREKALDQLTNLYVKDAISLEEYERLADEMOKASDPQS  
VLNSVIVAGSGGKSAQEGSNRTPFDSTDKPLSLNQDISRSKASFEPLSPNSALNSFPRPG  
DFFLCIMGERKVNGRMLLGKSASSITLMGSTVIDLRDIEVPASGMHIEVIAIMGETRIIV  
SPDMLVHLSVVPIMGEAISRADVPFGSNNQGILEIGGVALMGSVSVRVVP\*

>SPBIB\_v1\_280018|ID:27163484| conserved protein of unknown function [Uncultured spirochete bib]

MNIVISLGGSSIVAPQEGPSGIFLMQFRNILLSWLNQDARRAIIIVVGGGAAARNWQKAYRE  
FLSNFSEVNGDRGLRDFSCSNEALDRIGIAATRLNAQLVKEVFADCCIDPIITDPSSGFE  
ANRILVAAGWKPGFSTDYDAVLLAERFSAKKVINLSNISQIYSDPRINPAARPLSRIT  
FDSLKMTGADWNPANVPFDPVAAARAREIGLKVFASGTNLQNLSDILYEKAFVGTII  
E\*

>SPBIB\_v1\_280019|ID:27163485| putative Peptidase M20 [Uncultured spirochete bib]  
MKKKIEIDDTQALAIRLVRAPSVTNTSGESSFPDVLISILREQPFSLHPELIHDPVPIEG  
DSKGRNVLAFAFGKSSCVLAGHYDVVDTNAYGVLEPFADFPEALSKRMLQMLSSKTN  
LSSSELLKLDLESTAFIPGRGMLDMKSGLAAGIAAMVRFLKDDRTGNILFIAVPDEEG  
SSTGMKAAKMLSDFADEHALHYEAINLDASVDSGDGAEGKAVFLGVSVKLLPFVVFVG  
KPAHAGSPFDGFNPVIASAVFAREIECNSDSMNIRALVPGEPPPPSILYYREMRNRYDV  
TMPADVFCVAVNLTFEKDPEKVFDFHKTIVQKALDNSISLIYERASAFSRKKNEHVVTMYK  
FSSEIEFHHELAKRAERVVPGILDRLQRFAEKSPEDKVQQTFFKIVHELLSYAQIEGPSA  
IVGFAPPFYAKAQLDSERDQGFSLIHKDEVMSFNRDYGESIKLRPYFPGISDMSFLAPSV  
SREAIEFVKKESAVLQSYLDKYLESPLDTPVINVGWPWGREYHQNGERHRHYAFSLLPEL  
LFRLCNRLFHANN\*

>SPBIB\_v1\_280020|ID:27163486| AMP-dependent synthetase and ligase [Uncultured spirochete bib]  
MLKEAEQKYPDIYALKRTDSGYMPTTFKEVRQKARQFAAWLLANDLKAGDRAAIIAEGS  
PEWLISELGVLSAGMISVPLSIKLLPDEIPFRIQHSEAKVICCTHNLQLEKLANALNLAGL  
KKIDIVYLDDEIEWQGSILKHKVRDDSFITLQKALSVGSVLLKEKKEYEERLDLIENET  
KENDVVTISYTSGETGNPKGIMLTHLNYWSNCHDAVELFDNPLYFRTLLILPVDHSAHT  
VGLYTAMLCGISLYFVDSRGGIATLRNIPINLKESNPIFLLTVPSLSGNFMKKIIAAIE  
EKGGFIEKIFKSGINAGILWHGDGFHTPPFQDRLKSFFPYFIARFLVFNKVKKALFGNSI  
RFCVGGGALLDIKQQQFFAALGVVYQGYGLTEAAPVISSNSPRIHKFGTSGAIAPSVKC  
KIMDEMGTELTPGTIGHITITGENVMLGYKNPEATAEALREGRLWTGDLGYIDEDGFLV  
VVGREKALLIREDEGEKYSPEEIEEAITASTEVDQIMVWCDHKKYTIALVTLDENKVKHL  
IRNSINTAEQLLSILTDEFYRFKTDPAKAKVQPAWIPAVFQILEEPFSEQNGTINSTMK  
LVRHKAQIYQDLIAFSYTSSEGSTTLNKQNLKIRKHFSLK\*

>SPBIB\_v1\_280021|ID:27163487| protein of unknown function [Uncultured spirochete bib]  
MVIEDSFLRIKQQLNEGRRFAVISLVNTQTSVPQRAPQNAQKLILCENGQSYGSLGGRE  
FEMEAIEQAKACLALRSSKFWWIEEIPRIDESFPDSTKRKIEVFIEVYEPQPKLIIGA  
EDISLATAIIAQNLDFKIIILDERSEIANKSKFPMASHIICGPNLEQALSPILDQSSYIV  
VNFQFNRYERAVRYCLGKEWAYCGILGSKKKIVSLRKKLIEEGFSTEQLNRINAPIGLDIG  
AQTQYEIAISIIAEIIAVRHNKKA VFMKSVM\*

>SPBIB\_v1\_280022|ID:27163488| Ribose-phosphate pyrophosphokinase [Uncultured spirochete bib]  
MSYSDPHTLGIACPGAEAFANQVIRKLSGIYKHRFARKAQAIASRYHITPELVIRKINF  
ANDCNTGMLFLPGNTDRYRPPQFKINVRHTFFANGEIKTEILESIRGRNIYIFQDIENHQ  
PISFNDGTVHKVLSVNDHIFNLFAVDAAMQAGAAEINLVLPYYPYSRQHKKKGREGLTA  
ARIGKMLES LGVNRITLDIHSKEIENAFDRLRMENLHASFQIIDKLMSIVDIAKEEMVV  
LAPDTGAVDRNKFYANALQKPLALLYKERDYSKVSKNAADSNISEVRLLDVTKVVFMA  
DDMIGTGGTLIKAMRYLKD LGATKVICAVSLPLFSGNAVDDFDAAYKEGLFFRIIGTNAI  
YHNELLKKEWYIQSDVTGLFAQVISLLHHRSLSSLLDNRDVARLIKRKLESNSNTKSV  
PSNPQSDQRD GASNSIDDVIPYGAADKQ\*

>SPBIB\_v1\_280023|ID:27163489| putative hydrolase (HAD superfamily) [Uncultured spirochete bib]  
MKLFLRPRHLHRAGVLAFLDGLTYHNPEYLKFEESQIEQLADYLHIPNQAASSVLQRK  
KLRKERQLPPTSLANIFKEIGVDDLIIEWRKRKLRPHNWLAPDLLYESLNALKKFYQL  
ALITNNPRVIAEESLDALGVASLIATIALDDTGKSKPDPAPFQFLQSMNQAENCIVI  
GDRYDIDIHPALNEGMSGILIDNVKEIYLLPKLLLP\*

>SPBIB\_v1\_280024|ID:27163490| conserved protein of unknown function [Uncultured spirochete bib]  
MSLVTFGEIMLRLKSPGQERLFQSPLEATFGGSEANVAVALARLGIPARFVTLDPDNI  
GHECMREL RSHGVDVSGIKFKKGRMGYFFENGANQRPSNVIYDRAYSTLSEMEPSDIDW  
GKAFEGAKWFHVSGITPAVSQKCADATIFAVQTAKKMGLMVSFDLNYRAKLWNYGIEARA  
VMSEIARSADILIGNEEDYQKSLGIKGPKEASSGELDIDEYQTMCESTLNAPNASIAAV  
TLRESHSADSNW SGMVVARGQRFISRKYHIADIVDRVGAGDSFSAGLIFGLIKYGEPGA



ALEYAVALSCLKHSIPGDFALIEPGEVEKLLGGDTSGRVQR\*

>SPBIB\_v1\_280025|ID:27163491| 2-dehydro-3-deoxyphosphogluconate aldolase/4-hydroxy-2-oxoglutarate aldolase [Uncultured spirochete bib]

MKDLKALFYSTGIIPVIKIESLDKADGLAQUALRSSGIHVAEITFRTKTAPGVIERFASRH  
SDILVGAGTVTTKEEVDSALSAGAAFVSPGFNPVICSYCIKGVFVPGVNNPSLIEQA  
IAMGLSVLKFFPAEVSGGVRALKAFESVYSSVSFIPTGGIQENNINEYLALKNVLACGGS  
WIVPTDLIEAGKFEAIEGLIGSARRTMLGFLPLQHGDRLNREKADAGARIGDGAAIEVK  
TTSLRRLAILQAEGFSSVLGSEVMRGKSMAAAEIEIPSLHGRIRLVE\*

>SPBIB\_v1\_280026|ID:27163492| putative beta-D-galactosidase [Uncultured spirochete bib]

MIVTRLEDINRYRGLSTNLDTAFDWLLKEKWQNLQGGKHTIFGEAIYALVQSYKSKDHAA  
CRFEAHRSFIDIQMLTSGEEIIEALPREGLEVLEPYKPDIEFYVTPKDSAACQLFMKPG  
LAIFFPEDAHRPCMIAGDGPEDIGKIVIKVAV\*

>SPBIB\_v1\_280027|ID:27163493|kduD| 2-deoxy-D-gluconate 3-dehydrogenase [Uncultured spirochete bib]

MILDSFKLDGKVAIVTGSSTGLGQGYCIGLAEAGADIVGVDYVESPETAQIVRARGRRFL  
EIKANLMSIEPIQGIIDAAVKAFGHIDILVNNAGIIRRQDAIDFSEKDWDVMMNINIKTV  
FFLSQAAARQFIAQKTGGKIINIASMLSFQGGIRVPSYTSSKSAVMGLTRLLANEWAKYN  
INVNAIAPGYMATNNTAPLRADPSRSEEILSRIPAGRWGTQEDVQGAAVFLASSASDYVN  
GYTIAVDGGWLR\*

>SPBIB\_v1\_280028|ID:27163494|kduI| 5-keto 4-deoxyuronate isomerase [Uncultured spirochete bib]

MHTREAVNSEFVKALDTQRLREHFLIERVFPVPGEMSMVYSHVDRMIVGGITPTSVPALP  
VSKELGTDFFLERREMGIINIGGSGAIEVEGIRHQLGPREFYISMGTKNVFLSENPNE  
PAKFYFNSAPAHACQTRRVTLTDQAKHVEMGSDAECNKRVINQYIHPAVLETCQLVMGMT  
MFYEGNVWNTMPAHTHERRMEVYL YFDMPEDRVVHFHFMGKPEETRHIVVRNEQAVISPSW  
SIHSGVGTGKYTFIWGMAGENQAFTDMAVPMVLL\*

>SPBIB\_v1\_280029|ID:27163495| Transcriptional regulator [Uncultured spirochete bib]

MAEIKVQSLDRFTNILEILAREPNGLTLAEIARQLDLPRSTAFRLAVLLQRDYVRKALD  
TNR YRLGPGFIELSSYYLNNLELKTESAPYMRELAALGTIVFLARRQGSMMVYIDKQDQ  
FTSLRKYAIIQQKPL YCTSLGKALMLDMDDEIRRLHAAVKFEKFGPNTHQNIDSLIED  
IHRCKVRGWAQDNEEAEPGMNCVAAPIRDYRGQIISISTSWIPESRPDLEPGKVAIQVM  
KAAREISAAMGFRGNH\*

>SPBIB\_v1\_280030|ID:27163496| Nitrogen-fixing NifU domain-containing protein [Uncultured spirochete bib]

MLFEEVKSAIENVRPSLMADGGDIELVSVSDDGVVVKVRLTGACGACPYSIMTLKQGV EAY  
LKKVVPQVTEVQQD\*

>SPBIB\_v1\_280031|ID:27163497| Protein Soj homolog [Uncultured spirochete bib]

MARIIVFVNQKGGVGGKTTSAINIGASLALQHKKTLIDFDPOGNLTSGIGGTLTHTNIYH  
VISGLAEIKNVIQPLSIPRLFLAPSSVDLSGATIELVDRPDRNDYKRAIAPILEDYEFI  
LIDCPPSLGLVTLNGLAAATEVVIPLQCEYFALEGLSLIIQTIGLVQKSINPNLKIGGIL  
LTMFDARTRLSQEVVRQVTEYFKDKVFKTIIPRNVRLSEAPSHGLPAILYDPTCIGAKSY  
ESVTKEIMNRG\*

>SPBIB\_v1\_280032|ID:27163498|spo0J| Stage 0 sporulation protein J [Uncultured spirochete bib]

VAKFGLGKGLGALIPERQQFFEQSGQEASESPVRVVSIDSLSPNPDPQRKTFQSQESLNEL  
AESIRRHGLLQPLL VQEQAPGKYIIIAGERRYRAARLAGLLELPVILRSEDESHLELSL  
VENIQREDLDPIEEAQAYVKLMEITGATQERVAEMVGKSRVAIANAVRLLKLPEDIQSAV  
KEGSITPGHARNLLSIEDENERQKLFDRIRHENLSVRQTEQEAQKLQAALQNQK GKARKS  
RSGSSDDYEALDPLLRELKEKLIERLGTKVEITGSVDAGSIKIYFSQDDLQRIYDILD  
IQ\*

>SPBIB\_v1\_280033|ID:27163499| exported protein of unknown function [Uncultured spirochete bib]

MHCLKRGPKHASKTHKGVLPRTSTPFHMFQKWGQRLKPKVFAHFLTIIIMIPASGLFAQ  
QSASSATVSISKMTSALPKTFQATLPQGVTFQGGSPILRTAEHIGGKMLLAPSLEGVQT  
IINHISATTGTNLIIEALVFLPSPTLGGSYSASSQIDALGLLFNQFRSLQGIQYWSASR  
KIMRTLYTDAFRVDNPNDKNKIKDPETIAEFRAILPQKTYIYQKDQTFSGIITEVQCAVS  
QTTFLMTNTNVTPLRLIGIPVLSADGIRTGFLAAPSPEGVFLYFVTSIKSPSIGRDRVFE  
SASNKALALLHWFTEAASARSIIEPVHLPWNIDDLPEIRLKQAANNP\*

>SPBIB\_v1\_280034|ID:27163500|eno| enolase [Uncultured spirochete bib]

MSIIEYVEAREILDSRGNPTIEVDVLEDDGTLGRAAVPSGASTGEYEAVELRDGDKKRFL  
GKGVLTAVENVNTTIAGEICGLDALEQVDIDRTLIELDGTENKAKLGANAILGVSMATAR  
AAAEYLGPLYKYLGGAAHTTLLPVPMSNIINGGKHADNKIDFQEFMIMPVGAESFREAIR  
MNAEVFQTLKGILKSEGQNTTVGDEGGFAPNIENEQALQYIVRAIEKAGYVPGEQIAIAL  
DPAASELFEEGGGKGYRFWKSNDPKIFSSDDMIELYMRWVEKYPIVSLEDGLDQNDWDGY  
VKLTKTLGKKIQVMGDDLFTVNTKRLAKGIEIGACNSILIKLNQIGTVTETIETVNMAGR  
AGYTA VVSHRSGETEDTFIADFTVAMETGQIKTGSMSTRDRIAKYNQLMRIEDEMEGIAE  
FWGKKVFYNVRG\*

>SPBIB\_v1\_280035|ID:27163501| Membrane protein [Uncultured spirochete bib]  
MLTRRLDEAKEAWKRRDSEAARRAHLPTKSAEERHTTGKGGKYLKSIYGGLDGTITTFAA  
AAGVAGAALAPGVVLIVGLANLLADGLSMSIGDYLSKSESEYEAAEREREAWEVENYPE  
GEKLELEEIYRARGMAEADAKAVVDIISKDKKAWVDTMMVEELGIMQSDESPVANAIATF  
ISFAAFGFLPISAYVVALFVPSLDAIRFPLACFLTGATLFLGLGALKTIITGKWFISGLE  
MLLVGGVAASAAAYLVGVLLGGLA\*

>SPBIB\_v1\_280036|ID:27163502| DJ-1 family protein [Uncultured spirochete bib]  
MKKACLLLAEGFEEVEAITPADFLRRAGIEVTITGIASRKVKGSHGIVETDAGPEALAK  
DYDVIVLPGGQPGANNLAASPAVRDLLIRHSQKGLIAAICASPAVVLHGSCNLLQGKKF  
TGYPGTEVSVKGAHFVPDRVVIDGNYITSRGPGTAGFEFAIAIIAALEGRQKADEVAQHAL  
QK\*

>SPBIB\_v1\_280037|ID:27163503|y|jgF| Enamine/imine deaminase [Uncultured spirochete bib]  
MSKECVFASGAPAALGPYSHANKAGNFIFASGQLGLDPATGALVEGDVKAQAKQALQNLA  
IVLKASGCSLSDVVKTTVFLKDIRDFAAVNEVYGSFFQKDFPARSAIQVAALPKDGLVEI  
EAIAAYKE\*

>SPBIB\_v1\_280038|ID:27163504|patB| Cystathionine beta-lyase PatB [Uncultured spirochete bib]  
VNYDFDSIIDRTSTHSLKWDTRRLPPGCKDALPLWVADMDFACPPPEVVSIAIQERAAHPIY  
GYTGRSQGNYQSFIAWMQRNGWKIQKDWIVFSPGVVPALNLAVLAYTQPGDKIILQPPV  
YYPFASAVLNNGRQLVENPLVLDNGRYTMDFSLENKIDSRTKLLILCSPHNPVGRVWRK  
EELERLVDICAKHDIVISDEIHSIILGTEVHHCTATISEKAAAITVTLTAPNKTFNLA  
GLQIANAIIPNKRLRDAFAIQTENIGLGLSNIFGMVAQEAAYEKAEPWLEALLAYLKGNF  
EFLKNFLAEHIPAIKVLPLEGTYLPWLDCRALGLSDAELHDFFLKAKLWLDDGTMFMTG  
GSGFMRINIACPRAILKQALEQLEAAALQAS\*

>SPBIB\_v1\_280039|ID:27163505|mntP| putative manganese efflux pump MntP [Uncultured spirochete bib]  
MLTYILVGFALAADAFAVSVSAAACTDVLPLFLIGLRAAFMFGLFQFLMPIAGWLLGSAFS  
QFIQGFHDWIAFGLLGFVGGKMLFEAIRARRKQECPPDDSPKSHGILKLNTLFLALAT  
SIDALAVGLSYNILGHPVLVPSLIIGITTFVCLIGIEFGKRLKEVLEEWAEIAGGSILV  
LIGLKILVEHLSNGR\*

>SPBIB\_v1\_280040|ID:27163506| Flavin reductase domain protein FMN-binding protein [Uncultured spirochete bib]  
MNSIYEEIPANEAYSLQNPGGVIFLCTRGSVPEGALRESRYNFAPLAWCTPYEYDPISKI  
LLVCDTSHKTRFDIQENSEFAIALPSFDMRDLEQAGSVSGFAVDKFAHFSVQYFESKSI  
DVRIPSGVVGWMECTLERIVIEGTSIVFGAVKQAFAPDAWARRLHYVNDDETWYKPGER  
L\*

>SPBIB\_v1\_280041|ID:27163507| exported protein of unknown function [Uncultured spirochete bib]  
MQRRLPFLAMLALCCTTQIFAAPGIAFTLNSIKTNSDIAGLPLPTGADLTLELPLGST  
STAFTLRAAAGYESRMILRSTATMFPIAEPDAGVNRFFWTNALAELGVKQYLLHKEHE  
QAWLFLVVRGRYENNSPSFPTLFPDAQAVRSASVGGIAFDSIRWLGKNVKKGVSAELS  
YEYSPDFANFSGTPADFGANFTAKAFVPLSASFATYLALYGVGDYALGSHIPHEVLT  
FGGITGKIGDMVRGAQPWGYEAPAKTYVSAELRVAGPSMFRDFAIYPVGYLFADAAAY  
GSLYGSPLADNSGMASAGAGASVSVLNLWLWLGAYAGWRLPVDPLSAIYYGSAHGFFWN  
FTFVAHY\*

>SPBIB\_v1\_280042|ID:27163508| conserved exported protein of unknown function [Uncultured spirochete bib]  
MKKIIVALLVLVVASAVWAQTPGGLSAAKSTRMEADFTKIVTDMGWGTVDTRPVLAERM  
WDYFYFFYPVLNKDKQITGYVWAKDIRIASHYEDILVIINPDGTLQNWVVSANTRHADFY  
TDFAKKTQGAAIQKFIGMDSKRDWNQATDAVSGSTFSAKFFGELKAVLACFKIYVIDAG  
KLIK\*

>SPBIB\_v1\_280043|ID:27163509| putative Phosphoesterase PA-phosphatase related protein [Uncultured spirochete bib]

MAFIESMHAAELQFIQQLQSFLGLGFRIPMQFVSFFASEAFVIAVVPVLYWCIHRKKGAE  
FGLLILGSALFINLWVKQLLAWPRPYEIIPSLALAKESTYGMPSGHSQLSVVFVAFIAEFL  
PAGLRVPAMIIMPLLIGFSRIYLGVHFPSDVVGGYIIGVAFFGLFKAFGLKVEPMLRDSG  
WRLRVILAAALSFINNLLLPSDTMISGAFLGASIGFTFASRNVPIDQRDDVRHKLLRYLA  
GLATTGIIYLALKFASSPLASISGNNQEQLIRFIRYALVGGWVSYGAPFMFLKLGLAKRE  
SS\*

>SPBIB\_v1\_280044|ID:27163510|apbE| Thiamine biosynthesis lipoprotein ApbE [Uncultured spirochete bib]

MSFSRTYSIRITRAFLALSALLFGTISGRAIYAEDLTRTDFVLGTVCTIRLIDGGNANT  
LSEAFARLRSIEDHMSANKDGTEIAQINANAGKEPVKVSSEDTFYVITKALEYARLTNGAF  
DPSVGPLVKLWNIGNNGGEKVPPERELAAKALVGWQQVMDAATRQVFLKPKGMRLDLGA  
IAKGYAADEVAKILIAHKVKAADVLDLGGNVLVFGSKKDKSPWRVGIQNPESARGEYLGIA  
TGAQMTVVTSGVYERYFIQDGKRYHHILSTETGWPVDNGLVSVSIISKSSIDADALSTSL  
FILGIEKGMALLKNFPDTPYAVFIDKDKKVYLSPGASKVFTLQEKNYHLAEK\*

>SPBIB\_v1\_280045|ID:27163511| putative enzyme [Uncultured spirochete bib]

VASTIWRLKVGPIGVNICYIAESNGSTVIIDPGAEPKIHAFNAHSLKPSMVVLTGHGLD  
HSAAIADLFELLGTELPIAIHPDDAQYLGADGQQTNRALFEAIKAPSYFHSFWKPLPPAT  
VFLSDETVPVGTTLHVIHTPGHSGKSICLYEASLDAGSYGTDEDEGRGAAGWSCIISGDT  
LFRDGVGRTDAPSDPVALERSLRKLAQYSYMTLVFPGHGPRTTIGRELSAPFHE\*

>SPBIB\_v1\_280046|ID:27163512| protein of unknown function [Uncultured spirochete bib]

VPNDNAAPKFNEKTLEAFLEGLLDELKHPQDAKLLVEVRRAFRKKVPFHMRSYASALMIL  
RAAGIYRPKATRQAPQEQLQRQPAKREQFKSEQRSEQLRSESPRNQQAQNEQSRSEPPG  
AEHTNKEMISLFSVSMGKRHHLKPLELKKRIAERAGISPDLSLGRVHLLNYSFIEVPASES  
QRIIAAMAGAELNGRAIEIKPAKKRSESVSEGG\*

>SPBIB\_v1\_280047|ID:27163513| 3-dehydroquininate dehydratase [Uncultured spirochete bib]

MSKKGKPKICICLSGKTIEENLRILERYRAVVDYVELRADCLEPSEFNIRSFPEKAQLP  
CILTIRRKQDGGNFEDGEVRLVLFKALSFPKPKDAKANYAFVDLEDDFRTVPVIEEACHT  
FGTRIVRSHYFHDGIPENFDAAEQIAQEDDEIPKLVVNPQSSADFIRFLEWATRVPKRE  
HLLIATGAYGIVSRVLAWRFGSTWTYASPLHSGMEIAAPGHFDPFDLRNIYNFDLVNEQT  
ELYSLIGQHSILASLSPYLHNKAFREMGKDALLVPTPVDSFADGLKILELLGGKGAITV  
PFKEDVLPFLAFHSTDVVKRIGACNTLVRRGDWAGYNTDADGFERSLLEFLGKQDLSGCR  
ATIIGAGGAAKSIALALFRKGARCLVLNRTYSAGRDLARKYNFLYSHLDDRASDLISEYS  
DIIVQATSVGMREELDPISFYEFKGEVVFVFDLIYHPSKTLKRAEEAGCRVLNGYKMLC  
YQAAGQYKLMDEPPPIYAQLEQPKFS\*

>SPBIB\_v1\_280048|ID:27163514|era| GTPase Era [Uncultured spirochete bib]

VPKSAFVAIIGRPSAGKSTLLNALCGAKVSIVSSVPQTTRNAIRGIVSHPEGQLIFVDTP  
GYHLSDKKFNKLRDLVMQSLSDVDLILYVIDATREPGKEEEAIVELLKEAPRTVIAN  
KIDHPDAKPLLVEEFILPRMPEAKRITISAAQKTNLAALEQLFLLAPAGPLWYPEEITYT  
DQEPVFRIGEIIREKAILHTRDELPHAIAVEYRESTKRADGVLFARFDILVERDSQKPIL  
IGRQGSVIKRIREEAEADLKELFDYPVKLQLQVVDVDPDWRNEETLSRMIF\*

>SPBIB\_v1\_280049|ID:27163515|pth| Peptidyl-tRNA hydrolase [Uncultured spirochete bib]

VRVTLRRIQLVRFIMIRLCAFLGNYGKEYRLHRHNVAWLFLESMRISADLHWSTKFKGTI  
AQADFGYGVKVSILKPHTFMNLSGESVVEAARFYRCSPEEILVVHDELEMPFGAFGYKFSG  
GLGGHNGLRSLEKHLGTRDFWRLRFGIGRPDHSIAGYVLSPFADDELDTLTKTKVFPEAE  
KTFYTLFTEGIEGYEERYRKKVVKQAP\*

>SPBIB\_v1\_280050|ID:27163516| PHP domain protein [Uncultured spirochete bib]

MISNLHLHSCFSDGMSWPEDIALDAARSGLDMVALTDHDTMAGVARFCAACASRGMQAIP  
ACEIDVNEPQIDYKSELLAYFPGAEPAAAGAPATRILRESLRNRRARLEFLINSARELYP  
DKELSFEDLFRDKTRMEYDSALADEISWSKVDLFLYLKARRCIDPDMNYKAFKCKFFANG  
LLKKYKLDKPDIASVVAHVHADNGFVVLPHFGHLWDDDAALMHKETEKLRSKLAWFRRAG  
VDGVELYWYNADYRSKINELVRTVARPQGFFFTYGSDCGHPGSGKHTITKFKGNFEGFP  
VRQADGHQSEGHQGSAGHASPNTAG\*

>SPBIB\_v1\_280051|ID:27163517| protein of unknown function [Uncultured spirochete bib]

MFQLTDAILERIVFAMEDQTNEWLIDLRTGDIVDRSEVSDEDLEAVPERYTDLPFWSSRQ  
GFTILEAFAATVTSPPPELKLALNAALRRGKGVFKAFRHALSSNDALYRRFQEFKLNAMRP  
TIEKWMHAIQEEDALAAVKEEPEDLADIASELEIQTVALSEAPFDVGQVISDYATETYT  
TYPALSKWALLEIHEKLT SWIREPWIA YASIDGTHPLVLGIYSLKPLEGTACCAVWGIF  
ASKECATMGIEWPLLDRISEATAAGASLIILDGPLFPSSLNEEATSHGFMQAGSSLWKM  
L\*

>SPBIB\_v1\_280052|ID:27163518|fabD| Malonyl CoA-acyl carrier protein transacylase [Uncultured spirochete bib]  
MSGGSMKTCFLFPGQGAQYPGMAKDFYETSKGVRELFTASEASSMDLKTLLFESDEETL  
KQTKNTQIAIALAGAAAALSAKEHGIVPQGAAGFSVGEWPALAEAGVISHYDMFRLVSER  
GRLMDEAGAHSGGSTMSAVLYLSPEKIEQVIAEAGLTQCWIANYNSPSQCVISGTEKDIG  
IAEEKLRQAGAKRVIRLKVSGAFHSPLMHEAYEAFKELVEAITFSDPTINLYSNVSGKRM  
ESGAEAKKYASLQIISPVRWIDEEVNIAADGFELCLETGPGTVLTGLWKASGSSISCAA  
GTLDALVSFSL\*

>SPBIB\_v1\_280053|ID:27163519|fabG| 3-oxoacyl-[acyl-carrier-protein] reductase [Uncultured spirochete bib]  
MGKLEGEVCVITGASRGIGQAIARFKKEEGALVYGLSRSKPEANIEWIPCDVADEVISIE  
SAVNSIFQKENRIDIVVNNAGITRDGLIMRMKTEDWDVAVLNANLRSAFIMSRAVSRMMLR  
QRSGCILNISSVVLHGNGGQANYAASKAGIIGLTKSLAKELASRNIRVNALAPGYIETA  
MTSVLPDAAKQSLTTSIPLARPGTPAEVAAALFLCSPRASITGVVLNVDGGMGM\*

>SPBIB\_v1\_280054|ID:27163520|fabF| 3-oxoacyl-[acyl-carrier-protein] synthase II [Uncultured spirochete bib]  
MNRRRVVVTGLGVVSPGLNDIPTFWSNVKANKSGIAPITMIDSSELA VKIAGEVKDFNPG  
LRDPKESKKMDRFAQFAVCAALEESAQLQKESLDPLRTGVCLGTGQGGSATIEEAGV  
RLTERGPSRVSPMTVAKGLANFGAAQIALSLGVHGNMTVVTACAAATDAIGQAMHLIRD  
GHADIMFTGGSEASIVRMCMAFINIQALSSRNDAPEKASRPFDKDRDGFVMSEGAGILV  
LEEYEHAKARGAKIYAEIAGFGATCDAHHLTAPDPEGMWVAKAIELALNDAGMKPEDIDY  
ISAHGTSTPLNDPIETKAIKHAFGPHAYKLVSSLKSMIGHCIGAAGAIETIAAILGMNE  
NYIHPTINLDNPDPECDLDYVPNKGINMPVRAVFKESMGFGGQNAVLVVTKA\*

>SPBIB\_v1\_280055|ID:27163521|glgX| Glycogen operon protein GlgX homolog [Uncultured spirochete bib]  
MSGHFRALPKELHIFPGNPLLPGAMPHPQGVYFSVFSRHATGMILCLYESPHDDKPAASL  
RLDPVRNRTGDIWHCYIPGLKPGTYLWRAEGPFAPHEGHRFNPNKVLIDPYAKALTDGT  
LDLCSALAYDESSPKDLSFSEKPNDCMPKCVVIEDNFDWEGDTPLNYPLKDCIYETH  
VRGLTRSSSAKVKHHGTYRGGVEMIPYFKDLGITSLEFLPVQEFDSAERFRHNPVTGEQL  
SNYWGYAPLAFAPKTSYAYPDGVDHDSYDPEFPVKEFKYMVRELHKAGIEVILDVVFNH  
TAEGNELGPTLSFRGFDNSIFYMLAEDKRYRNYSGCGNTLNCNHPVMRTFIKECLRYWV  
VTMHVDGFRFDLGSILGRDSQGNLLPNPPVIESIAEDPIMRNTKIIAEAWDAGGAYQVGS  
FPGGRWAEWNDRYRDDVRKFWRGDEGMAPHFATRITGSSDLYLKNGKRPFHNSINFVTSHD  
GFTLNDLVSYHQKHNEANGEDNQDGLNENYSSNYGIEGPTDVPFIEEIRNRQIKNFFATL  
LLSIGTPMICGGDEFRRQTQNGNNA YCHDTEMNWDWSYKQHKDIYRFAKLLIGFRKNH  
QAFRREDFRGETDQNTANPEAPDILWFDEHGNPPLWTS LGKVLVARINEHKSSENSK  
VPIYSYLLAFNASPEAIQIQLPDDNTEDTWKRIVDTSLPAPHDFEENEYLALGAPHTYVM  
GPRSFVLLIAGH\*

>SPBIB\_v1\_280056|ID:27163522| putative SEC-C motif domain protein [Uncultured spirochete bib]  
VKTTSGTSKAAFYLRKGIYELAHHRPAKALALLRQSVEITPPSCENDLSKALYWLSIALL  
RLDQRELA VKSLANAQKIRRSYARKVYVRNINEYGM LKRP TRELDDL YAFVSIQLSSYL  
LKKPQHRFGSQAESAVLKLILETWKQLKDSDEFKSLECGEKLLFRKLLKIDFIFGSYS  
TSPRYSERFAMNIASVGMRTCSCGSGLPFEQCCGRVQGLSEI\*

>SPBIB\_v1\_280057|ID:27163523| RNA polymerase sigma factor [Uncultured spirochete bib]  
MMERKKTKETRSSAQFDENVLSMYLREINRIPLLSREEENEYATRAALGDELA KAILAK  
SNLRFVVNVAKKYQNQGLPLADLIAEGNIGLLNAIEHYDVTKGYHFISYAVWWIRQAILK  
AICEKSRMIRLPLNRANELVQIEKARNLFEGELSEDAEIREVAEFLEMEPEHVKDIISIS  
RDLISLDAPVYDEKNSTTVGELIENEHHESPEQNAIQSSLREDINKVLAALTAKEREIE  
YRFGNLNGKRPMSLKEIGDRMHLTKERIRQIEKAALKKVAVPETMEILQAYMA\*

>SPBIB\_v1\_280058|ID:27163524| putative Polyprenyl synthetase [Uncultured spirochete bib]  
MEHLFLEFTQQA KATISAHIASILHENQPMFSRISGTGAWLASEMEDFADSGKMLRGLA  
ILGAQLLGMQNQKNSVSLAAGLELLQAGLLVHDDIMDHDEKRRGKPTFHIRIRNKIQWPD

QALSAPLAVQLAEAQSICAGDLFFFLAWQEIAYLPQRVSVTVAQEHAKVTLAQMVDVALG  
YVEGFDPDISSVIEMYRHKTARYTVALPLMAGALLLDNCTSEVLKSLERLGESESLGIVFQLQ  
DDRLGLFGDETAIGKPVGSDLKEGKTPYILALIPQLSESEMKRFSIFRAQALEPSELE  
WIRSLIVSRGVDAKIRSLIDNQIELARKALADLGQFEAVSEETMILLADDFIDYLSRER\*  
>SPBIB\_v1\_280059|ID:27163525| protein of unknown function [Uncultured spirochete bib]  
MMRLSLYLLGHNYLKPFRIRAHKGMHPRTHAEAAGIPVHLVQHVFVQALTGGIRDFLSRCT  
LSETMRRTWEKRWKTPGKDKAEYLPKYALA\*

>SPBIB\_v1\_290001|ID:27163526|gyrA| DNA gyrase subunit A [Uncultured spirochete bib]  
MSESGNIIQPIEEVVKTSYLYNAMSIVSRALPDVDRDGLKPVHRLLFAMEELGLRNNA  
PTKKSARITGDAMGKYHPHGDLSLYDALVRMAQDFSLRYPLVQGQGNFGSIDGDPPAASR  
YTEAKLSKIGEMLADLDKETVDFVFNYPDESLEKPSVLPSAIPNLLINGSSGIAVGMATN  
MPPHNLREVAQAIEAYIENPDISIDLMNYVKGPDPFTGGIYGMQGIRDAYATGRGRLT  
VRGRFIIETMKS GREQIVFTEIPYALNKTTLVTRIAELVRDKQIDGISDLRDESDRDGIR  
IVLELKKGAITKIVLNQLFIHTPLQSTFGVINLALVNGAPKCLNLKELITYYVQHRFEVV  
TRRSQYELKKAERAHILRGLVIALQNIDEVVAIKASRNVDTAKTNLRRERFGLSDAQAQ  
AIVDMRLGRLTSLETEKLLAELKETEARIEYLRALLADSAAIHAVIKKEIHELAEKYGDE  
RRTEIVPNQVEQINIEDLIKPEEMVILISNKGFIKRISVNQYRSQGRGGKGSNSTSLED  
DFLQQLFIANTHDYLLFISSWGKAYWLKALEIPEASRQARGSHIRSLAISQDEEITAVV  
DFSDFSKQYILMGTGKGVVKKVATKEFANAKTRGIIGISLDDGDRLVSAILTGGTDEVM  
LISRKGLALRMQESQVRQMGRARGVRLTLQEEDELAAMLRVDSEESMLIITQNGYGKR  
VKYDLFTPHSRGTRGQIYEPDESSGEVIKAITVREEDEVMVITSMGKTIKLNVS AVRQM  
GKAARGVRIVNIDPPDLVIGMDKIVQQVELEGSAPNLVPELK\*

>SPBIB\_v1\_290002|ID:27163527|gyrB| DNA gyrase subunit B [Uncultured spirochete bib]  
MESTVNNYSASTIQVLKGLEAVRRRPGMYIGSTGIEGLHHLVYEVVDNSIDEALEGYCDN  
VVVALEKQDIVRVEDDGRGIPVDIHPTEGISALELVMTRLHAGGKFDKKNYKVSGLLHG  
GVSVVNALSTWLEVYVHTGGKVYYQKYLRGIPEKPVVQIGETDKRGTIVRFQADPEIFEE  
TVYSFDILSNRLRELAFLNKGIKISLLDERLAQPKRIEFHFEGGLREFVEYLNKNKSAIH  
REVIYFSGTRDDVEIETGIQYNDGYNETMFSYVNGINTREGGTHLVGFRNALTKVINDFF  
KKSXYNKKLEENLSGDDVREGLTAVLSVKVQEPQFEGQTKGKLGNSEVKGIVESFLADQL  
DLYFQKNPDVINIILDKCTMAARARIAARQARELTRRKSLEASSLPGLADCQEKDPTK  
CELFIVEGDSAGGSAKMGRNRVFQAILPLWGKMLNVEKARLDRVIGNDKLQPIIASLGTS  
IGEDFDVSKLRYHKVIIMADADV DGS HIRTLTLLTFFRYMTELIEHGHVYLAMPPLYRIV  
YDKEVRYAYSDEEKDHILSEINKDSSKIAVQRYKGLGEMNPEQLWETTMDPERRMIKRIT  
MEDAVLAEEMFVTLMGGEQVEPRRLFIEENALAVSNLDV\*

>SPBIB\_v1\_290003|ID:27163528|dnaA| Chromosomal replication initiator protein DnaA [Uncultured spirochete bib]  
MIDESNETVWQKALEIAKSQVPESEFIMWFRGLGYLGFENGITLLRANNTFLRDQFMRKYG  
DFMREILSSILGMQVNLVSAEQPSAIEQRLPLQKAAATSLNSSAKKAKEKPNPQQAASPV  
TSISDEEISNNSYPAYSRTQESRTANLQPRYTFESFVVGENSENFAFNAAAA VAEIPGT  
SYNPLLIYGGVGLGKTHLMHAIGNRIAERHPELRIICVTAEDFTNEFIKTIHRTTNEFK  
NKYRNIDVLLIDDIHFFQSKHGVEELFHTFNALYDSGKQLVFTCDRPA SELKDFSERLK  
SRFMMGLKTDLTTPGFETRAAIIRKKLELYKRTFSEDVINLIAKSIETNVRDLDSCHQI  
IAYS DLINVEPTYDIAQNIKQLTNAFKPAAINVSSIIKTVADYYKLSISDLKGGKRSKN  
IALARQVAMYIIRETTDYSTTEIGSEFNDRDHTTVMHSCQKIEDLIKFD SIFASAMNRLI  
QDCKENSST\*

>SPBIB\_v1\_290004|ID:27163529|dnaN| DNA polymerase III subunit beta [Uncultured spirochete bib]  
MKFICDRDFTSREIAIAQDIIASKNAFMSIMSNVYLETTDSKLIIRATDAKVGFE TEIPVS  
DSEPGSLTVFCDKLMAITNSIPEGDMLFEQRESSVEIRPLSKKVRFLKTIAGDKFPELP  
RIEENQYFILQAHLRKMISQTIFS VNDETRFFMNGVFMKLPDDVVAMVSTDGRRLAF  
ISTPVGNIPDFASAIIPKALS VLMKRAPDEGQILVAVNEKNIFFRFGNYQLSSFLIEGK  
FPNYQKVIPHDQRNHFIVSKDDLQAALRRVSLFVEKSNK VILNVSSKGLVLESEETELGA  
AREELPCEYEGEDVVILLSNRYLEDPLKVLDTDKLAI EFTDPSRAITLRPEPAANYFHII  
MPMQQP\*

>SPBIB\_v1\_290005|ID:27163530|recF| DNA replication and repair protein RecF [Uncultured spirochete bib]  
MAFEQIRIARFRNIEETELELGAGNIFLLGENGQKTNFLEALYCLSYGNSFRTHQDREL

PMHGSPEFLRAQWREINSPAQEQISIRYSIEGRKEIRINDKLLSDRKELVAHNPAVVFC  
HEDLAFAAGVPEERRFFFDQCAGMLWLDYIDLLRFYRRVLKHRNIALKTDTFSILDTLDE  
QLAQYGHEIMAYRKRLSQLFIARFPQMYELVSQLGTEVSIRYSPSWPLDSSKEEIMALLA  
EYRTKDIEAATSLSGPHRDRWIFTRGRNFAAFASGTGQLRLASLILRIVQVHLYAELSA  
EVRCPVLLDDVLELDVAKRRRFFSLLPAKDAGAQA VFTFLPEEPWREYADESTIVYR  
VSNGRFSREESR\*

>SPBIB\_v1\_290006|ID:27163531| protein of unknown function [Uncultured spirochete bib]  
MDDFRVKKAGEILSRFFDEKTLRSATQFESFRASWKNIVGQRLADHSPKPKSILRRTLLIS  
ADHAGWIQLLQIDQERILQRIAKNFPELEITSLAFTVEEAASEAKQSPQVQARQPGSPLA  
PLAESLPLQPEPDAAHARKASKSVLPAPLKEIFARLQRPRGD\*

>SPBIB\_v1\_290007|ID:27163532|rpmH| 50S ribosomal protein L34 [Uncultured spirochete bib]  
MKRTYQPSRTKRNRKFGFRARMKTKGGRLILKRRRAKGRIKLSVADEKKKY\*

>SPBIB\_v1\_290008|ID:27163533| Ribonuclease P protein component (fragment) [Uncultured spirochete bib]  
MQVLYKGEQESRAAFIAVRSFSGAVARNRAKRLARES WLLLRHSVKS GFDIVFVLYPGFA  
ALSDCRSAMQYLLHKADLLR\*

>SPBIB\_v1\_290009|ID:27163534| putative membrane protein insertion efficiency factor [Uncultured spirochete bib]  
MNIVNKLSPFLLVAIRIYQLVISPLFPSCR FYPTCSSYSYQAIRKYGPFKGLVLSFKR  
VIRCHPGNPGGFDPVP\*

>SPBIB\_v1\_290010|ID:27163535|yidC| Membrane protein insertase YidC [Uncultured spirochete bib]  
MSNIFEQEPSSKEDRRRTIIAVVLSTVIVSAGFMVQNALFPPATQQSTATQTPAQGTLP  
AQNTSAPAVAVPSPIPVKTASSSSIPVPA AERTYIIETDVMSATLTNAGGEIVSLTLKNH  
RDKSGAVDLIVRGSSGANGLSLSFGSATAPVRELMNAQWLDESKTAIEFSRMFEAPLAGS  
DQKVPFVLKRAYSFKKGEYLFALGISIEQPDGKPIALGANGIAYRLDLGPQIGPRFDQLP  
KNADYRKYIAEIDGKKKSEQPKANTPTVIAPSASWLAMSGKYFTFIAVPKAPMSGYEIET  
AQDPLIKQTNTLSLLRSTFSGVSTTDTYYFYFGPKTSAELGKYEYADKNGFGLASLKLED  
AMEGSGMLGWLENFLKFLNFFYKLIPNYGIAIILVTVLKALFYPLTKKSSMSTARMAE  
LQPKIQELQAKYKGNPQKLNQEMAELYKRENYNPMMSGCLPLLIQFPLFIAMYNLFNHFD  
LRGAMFIGGWINDLSLPESIINFGNFR LPIVGWNDLRALPIIYLFSQLLYGKFTQSPQSA  
QNSNQASQMKLMMYGMPIFFFILYDVPSGLLIY WITNNVLTILQQIVINDLMKKHKLA  
RAE AATSTGGGPVSAGTGETSSRTAGNATKPAASKLASGKKA AVDAKARPVGRAGSKEGF  
SEKVTKWLENKAGKTEKGSKR GATGKSGPNSGSGSAKGSPPKKNN\*

>SPBIB\_v1\_290011|ID:27163536| putative RNA-binding protein [Uncultured spirochete bib]  
MIYEFEGKTEREAIELAAQELGLDTS SFDVEIENQSGGLFKKGKVRIRVHTKDAPRQAQ  
QDAPEEKSEKQERHDVEPIPMDDFERKMVEWTK E VIEHMGYSSDVSVAFREP KKLGLRID  
TESASILIGKKGRNIDALQLLANVYAGTLGHNDMKIVL DSENYRLRREEALVRIAYETA E  
EVRRSGRSVLLEPMNPFERRIHTTLNDIID IETKSEGEGLMKQVRVMLKGRK\*

>SPBIB\_v1\_290012|ID:27163537|rfnC| Electron transport complex protein RnfC [Uncultured spirochete bib]  
MVIWGGFVIIFQHIASNAKKL VFSAESALIFKGD LSTMSIRTFKGGAHPPERKDRSGGKP  
IERLTSVPQVVIPVNQHFGAPIQPLVKVGEFVKAGQKIADA EGRMTVPLHASVAGVVKKI  
EPRMQSNNT EGLCIVIEPKDPPEGESAQDFMPPLDPFACTKEEALARIRAAGIVGMGGAG  
FPAHVKLAPTKPISYVIANAVECEPYLTIDERTLIETPEKIVDGVAIVMKT VNAPEGVIA  
IEENKHAIPYVQKAIDQSPQVKAGMKIRIQELKTKYPQGGEKMLITAITGKQVPSGGLP  
MDVGCVVS NVGTLCAIVDAFREGKPLIERGFTVTGGACKTPKNL VAPIGTLISDLVKASV  
VETDEESLAKVIFGGPMMGVA VPSYEIPVQKNTSGVLLMSKEEAMQYEEETCIRCGRCIR  
ACPTAVSPALLAIAIESGN YAEAEKIGLLDCIECGSCSFVCPAHRHLVQRFRV GKQVLR  
LKQKEAQNVR\*

>SPBIB\_v1\_290013|ID:27163538| Electron transport complex, RnfABCDGE type, D subunit [Uncultured spirochete bib]

MSDRKLLSSSPHIFSPVDT PRIMLSVVIALMPATAYGIYLYGLPALGVVVVTSIAAAVVS  
EFLFRKLIKASMTVGDFS AVVSGLLLALILPPSTPLWMVALGAIFAIVIAKEFFGGLGAN  
PFNPALIGRAFLMSFPAAITSWMPKGLGLPADALSAATPLNLLKQGNALADVAKYFGA  
SDTGAFYRQLFMGYRSGSIGESSILLVLLGGLFLLGIGVIQWIVPVSVLASTFVFSWLLG  
MDPVLGLLTG GIVFGAFFMATDYATRPLTPY GQAIFGIGIGLITVLIRKFGGYPEGV TYA  
ILIMNILTPFLNKL RVKKYGFVPPPKPARPSKEATK\*

>SPBIB\_v1\_290014|ID:27163539| Electron transport complex, rnfabcdGe type, g subunit [Uncultured spirochete bib]  
MKKDMVKLGITLALFASLACASLAVVYSFTKESIEKQSEMQLTASLKEVFPEASVFDQVQ  
DLASDPDPNVKFEAVYEVKSDKAPLGLAIKATGSSYGGNATLLVAVDLHRSIAGVRVMELK  
DTPGLGMNASSPTYYYVDKTKKTTFTGQFNGKYLDAFEVKKDVIAITAATITSKSLTKII  
KTAGDAAIAYMDKKAAMSTGDAGAPADANAQTQAGGN\*

>SPBIB\_v1\_290015|ID:27163540| Electron transport complex subunit E [Uncultured spirochete bib]  
MKKLYSIFKQGIIFDNPLLMLMIGLCSAIAVTTNVSNGIGMGLAMTFVLLFSEVIISLFR  
KLIPSAIRIPVFIIVIAAFTTMVDLVMKAYFPDLKSMGVFIPLIVVNCIIMGRVEAFAS  
KQNLVSVIADSLGMGLGYTWVLIGLAAVRELLGNGTLAGIQIMPSSYQPILFFILPPGGF  
FVFSLFIAFNIWLKKKMEASQRTKELAAKKEAA\*

>SPBIB\_v1\_290016|ID:27163541|rsxA| putative inner membrane subunit of an electron transport system [Uncultured spirochete bib]  
MDLMKIFLLALLVNNIVVMRFLALCSYIGMTSDVQGQSVGMGFAVTFVTVLATAATWPIYN  
YILVPLNLTFLQILIFILVIASLVQLVEFYLKKNVPGLYSAMGIYLPITTNCAILAVTF  
ENISFKYNFIESIAYSVGVSLGYLLAMVLLAGIRDRMKTSPVPKFLQGTPILFMATALIG  
IAFMGFSLIK\*

>SPBIB\_v1\_290017|ID:27163542| Electron transport complex, RnfABCDGE type, B subunit [Uncultured spirochete bib]  
MVGTLITFGFSAVLALVLGVALGFFREKFKVERDPKIDEVREALPGANCGACGYPGCDG  
YSEAVATGRAPTTKCSVGGSSATAEALAKIMGVEGGAEDKVAVLLCQGAVDKTVSKGEYN  
GIQTCRAAKLSTGSIKTCWSWCQGFQDCVNVCKFDALAMGEDGLPHVNYDNCTGCGLCVE  
ECPQKILTLVPRDRVGSIVLCSNRSTVKASVIKTCVKGCICELCVKSCPEGAITMVNGI  
PVTDYAKCTSCGICVEKCPKCYKMLEVDVFGTKKLVPMVMEQAQA\*

>SPBIB\_v1\_290018|ID:27163543| putative Lipoprotein [Uncultured spirochete bib]  
MQLKSRPIGRLKYFIFMQVLSNNTMKFLRGGARGRSIGAVKSISVAHIIAARFIAARIV  
AIAALWSALAVLPAYS AVTAPPLLGRASADSRQAVIKAAEAFLGAPYRLGGKTKSGIDCS  
GLVYAAFLKATGIKVPRTVRDLSKWVLVIPRQDLVPGDLVFFDLEASATATSVPSQTSVP  
QNA AFLSKADHVGIYIGEGIFIHAASSGSPKGVIKSSLSEAGWKHRFLFAGRALPASALS  
GIAAEWGGGVGLGHLDLSSPFVSLRSFNGWGELSLPIANNFAAGIRLGIADRYLGVV  
RVPAELDIGQISGFSLFAGPALTFGSSVHVIATGGIRWSPLLFSSGAQRFGIY AELRYDH  
YVPLAGQPDNAVADMNACVSFSIGFRLRSVKY\*

>SPBIB\_v1\_290019|ID:27163544|yefM| antitoxin of the YoeB-YefM toxin-antitoxin system [Uncultured spirochete bib]  
MDAVSYSDLRQNLKSYMDKVYKDHDPLIITRKNENLVLLSIDEYNSLMETTYLLSNDAN  
AEHLKKSIAQYTAGNVSKRELLNDE\*

>SPBIB\_v1\_290020|ID:27163545|yoeB| toxin of the YoeB-YefM toxin-antitoxin system [Uncultured spirochete bib]  
MNKLFTEAWKDYIYWHETDKKQLKINDLTKEIDRMPFEGTGKPEALKQNLQGFWSRRI  
DHEHRIVYKVEENQVIFISFRYHYSK\*

>SPBIB\_v1\_290021|ID:27163546| transposase [Uncultured spirochete bib]  
VKLLCSIAQVSRSGYYRYLLITQKPNKDARLAEKVREVQEAVCYSYGAKRMAHVLSESEQ  
VPINHKRIARIMQKYL LGARILRRHPEYWYRQRHKVRLSDRQCAPNILNRDFLAPCPLK  
KLVTDVTWISCADGTLYLSAVMDLFNRQIISYTLRRTTATALSPILELVGSYNLQGT  
VHSDRGPA YRSEYQALLRKHGIVTSYSRAGNCWDNALMECFFGHMKCELGFVTGSQKKQ  
RVAQVSQKIHEYL VFYNKTRIQKNLGVVSPMGYKMLYTSSIESNNVST\*

>SPBIB\_v1\_290022|ID:27163547| protein of unknown function [Uncultured spirochete bib]  
MKYRKAERGS MKYPLELKQKVLKDYFEGKDGIRGLERTYGIQHQLILSWIKTCQQPSYRM  
RQGKVPKEAALHLNEPPVFNDPRKELEYLRAENAYLREMLMLSGVRKNGRKKKALPPSND  
SAHEATP\*

>SPBIB\_v1\_290023|ID:27163548| Tryptophan synthase beta chain 2 (fragment) [Uncultured spirochete bib]  
VSTDRGLVQSETGKFKPTLTIIACVGVGWSNFAGLAFPFVKKKIEGADIEIIPVEPASCPS  
LTKGKFTYDLGDVAGMTPYLAMYTLGHTFMPHPMHAGGLRYHSMSPVLSQAAAEGLLSPS  
AVPQL\*

>SPBIB\_v1\_290024|ID:27163549| protein of unknown function [Uncultured spirochete bib]  
VAPETSHALAQVIREATKAKKEGKEKVILFSLSGYGLLDMQRYADYFPGKLSNLELSEAE

IEKALAGLPKLETVG\*

>SPBIB\_v1\_290025|ID:27163550| DNA and RNA helicase [Uncultured spirochete bib]  
MRIIADLHIHSHYSRATSPKLTTPPYLDRWARIKGINLVGTGDCTHPGWLAELEMEQLEPAE  
GGFFQLKSTLRREFDAGEALAEGLPAPTGDSPVRFVLTGEISTIYSRDGRTRKIHVVIL  
PDFAAAAAFQARLERMGNVSSDGRPILGVDSRDLFAALLDADERSILVPAHIWTPWFSAL  
GARSGFDSIEECYGD LAPRIGAIETGLSSNPPMNWAVSALDRFAIISNSDAHSPEKLGRE  
ATVIDMENSFAGLAGALTGGGPAGRIAGTVEFFPQEGKYHYDGHACGCVLSPAESAAYG  
GLCPVCGKPLTPGVMRRVAELADRPVDETAASCPDYAGTNRPPYKSLIPLPELLAELLGT  
GSGSKKVAAYGTLVERAGSEFALLDRNEAEIETLGTAGVPGELLAMAVGRMRSGQVSI  
KPGYDGEYGVIIHAFAPGERIESKAGAGLFDDETGTGEEETAPAGRARAGTLTASEPAGRK  
KDATPPAALDKAPKSVPESTRAAFGLDPAQEAAVNHPGGPALIVAGPGTGKTTVLALRIA  
RLVEGGLDPSSILAITFTNKA AELRGRIEGTIGGARAARLTAATFHAFCLSVLREHTAD  
ASLLSSFGVLDEEEKTAFLNLA VRPSQGRGSGRAEASRTLADNAQTDLLQASLTKTSRP  
QKVRRLASYIEERKRFLLLPGDRVPRLGPAGDGLAELAAELGVPLDVLDDVA YARYRD  
ELKRAHALDFDDL VAGAARLLAARPEILSAYRARFRAIFVDEYQDVNFAQYALLRLLAPG  
TDSAELCVIGDPNQAIYGFRGSDRRFIERFLADYPGAAIYRLVRSFRCAPGIIGAAGRLV  
GAELGGSGTVVALSRCEFPDASEAEGIAREIDRLIGGTRFFAIDSGVAGSVGAGSGAGL  
ASQAHTASREGPALSSLGECAILVRAAALAQPIEKALLDHGIPYRFIDKPPWWEGERIS  
VLSL VRAAARIDVRPDAGIKRAVEATA CAIIGQHNTROGQASPEKVLRARLPGLSPA EAV  
RAAIDLLDGEAAAGASKAVAAGVPRVAFGTRPGESLERLISQASLYPDFASFLDDLALGS  
PQDGYEAHAECVSLMTIHA AKGLEFDYV FVAGLEEGLLPFTLFEGHGGARAGDRKSGESE  
ENSGEAGREDSARRRERIEEERLLYVAMTRARVGLYLSWARSRHFLGRKLSLGPSRFLA  
QIEDLVPKVEQTPPRKPKPQLDLF\*

>SPBIB\_v1\_290026|ID:27163551| putative Methylglyoxal synthase [Uncultured spirochete bib]  
VSVDLSSNLSKCLDFCKRLVQINGESLDSIKRIALVAHDKEKRELA EWVQYNWKT LVKHD  
LISTGTTGRLVEETMIAKAGDVRPEGLRLTLLKSGPLGGDQQVGALIAEGKIDIMIFFLG  
SYVSPSPRRRCQSPFEDSRSLQHSGL\*

>SPBIB\_v1\_290027|ID:27163552| transposase (fragment) [Uncultured spirochete bib]  
VTFLYSVMDSAYDASPIREYISGKGHVPLIEINTRRGCTRSFSPAQE ARFAIRTTVEGAN  
AHLKDWLLPAQLFVRGVTKVTFRLLYGVLC LAALKILQYFILPSLQTE\*

>SPBIB\_v1\_290028|ID:27163553| protein of unknown function [Uncultured spirochete bib]  
LCKKRSEK GIRVIGRSPQPRVYLLKGGNMGFYDPQHRKKRCVLSREL VFKALLQIITQVQ  
KDLHSTKNFCYTLHGRGHSC\*

>SPBIB\_v1\_290029|ID:27163554| protein of unknown function [Uncultured spirochete bib]  
VTSPMKSAEILGGMQILLDLSYDLQECFED\*

>SPBIB\_v1\_290030|ID:27163555| protein of unknown function [Uncultured spirochete bib]  
MYRKKEKVAEF EKFDMMVFGGSLRRANRWARLTDLIPWDEVEACYASLFVEQNSRPAISVR  
VALGSLILKENLQYCKARGIRLSGPKLGRPLSDIAKNQKQLREEQRIARQDERMRNAVEG  
KRRYSLDRIMTRLQATSESTIMMVFLVMNLGRLLRKTASAFFALLVSLISRLRAQHIVS  
NHAAQAA\*

>SPBIB\_v1\_290031|ID:27163556|metK| methionine adenosyltransferase 1 [Uncultured spirochete bib]  
MTQPLLRPFTSES VSEGHPDKICDQISDAVLDA CLA KDKHSRVACECF TTTGLVLVGGEI  
TTHTYVDIQQVARSVVREIGYDNPEYGLDWASMAVLNSIHNQSPDIAQGV EGHGLKEYEG  
KQGAGDQGM MFGFACNETPELMPTPI LAHKILQKASAVRKAKEIAWMPDGKSQVTVEY  
DGHKPVRI SAVVLSQQHDEINGSGHYLEYEIRQTLIEKVIKPVLA PTGLLDERTRYFIN  
PTGRFVIGGPAGDTGLTGRKIIVDTYGGMGRHGGGAFSGKDPSKVDRSAA YMARYIAKNV  
VAAGLADRCELELAYAIGVPEPISVLVETFGTAKVDEFAIEQAILKVFDLSPRGIIETLQ  
LKNPIYRATAAYGHFGRDSFSWEKTDKIEALHKAIR\*

>SPBIB\_v1\_290032|ID:27163557| putative Zn-dependent protease-like protein [Uncultured spirochete bib]  
MMIATIREAIASINAHDTIKISDWRLVERRLERQERY YVASKAEQARAVDETLYSLTVYV  
DTIASGAGGSGGTSSGAGTGSLPNAASGSASSAGTNNPSASPALKKFRGEATITIQPTFS  
RAECEAKIRQA AFAASKSRNPWFELPEPSAPKTSVPVSGFEALSPAERIETVRHAFFSAA  
NRFGGNARINSLEL FITKETKRLNLSRGFDFASTIWRGYSEFVVEADSSSGTVELFDIE  
FSEPDASRLSEAIETRLAQVRDRAHAAPMPTLQGLSVILRGKEAEVFGWFFHNSRTEMI



YSKASAFEAGKSVQESDKGEAPVEPLDVFAEPVISGLPSSSAFDADGFPLERTAVIEDGI  
LKTIGSIRHADWLGVPKGAFLFSVSPGTMSLDEMHAAPYLEPVMFSDFRLLDPVTGDF  
GAEVRLAYYFDGAKVVPVTGGSSISGSLALRAAMRRSKEVGLAAHSLCPKAVMLQGVIIIT  
GAC\*

>SPBIB\_v1\_290033|ID:27163558| Peptidase U62 modulator of DNA gyrase [Uncultured spirochete bib]  
MPKRTHSPFLLEAKPVLGEVIEHLKPWFYISVLATDDRGLSYFALPGETRTAEPMWVQR  
GFVFRAQREGKVAEYACAVLPGAAQESVSFASTRSRASASAEIADAVRARLDSLLADPT  
LIAFPQIADEPAAAEFLGEIEEDPFTADPEDVLSRLAVLREKLTGKVVVMAQSRYECD  
VSRLFLSPNRSMLMQSFLWSQAYLFGVARRGQMSKMSYRPASGRKGLEILRGLETSVPELA  
QELADLLEAVPMEPEGEYEVILDPDMAGTLAHEAFGHGVETDMFFKKRAKALEYLGKRVGS  
DLVTMYDGAAGVDQTGSYLFDDDEGTLATKTCVIENGILKGGISDTLSALALGIPRTGNR  
REAYSHKAYARMTNTYFAPGTSTLEEMIASVKHGWQLSQLNSGMEDPRNWIQLICMVGR  
EIKDGKYTGRVASPVVCSGYVPDVLSAVSMVSSDFELGGSGACGKGHKEYAKVSSGGPYV  
KTRMRLG\*

>SPBIB\_v1\_290034|ID:27163559| putative redox protein [Uncultured spirochete bib]  
METSKREMKVLITGKSENPTKINLRAGKFELAIDEPKSLGGTDQGPSPVQVLLMALAGCL  
NVTGHEVARQKGLTLHGKVMRIEGVMNPCTFLGCSFEERAGFQKIMVNITPDFEDATDAQ  
IEEWMKETENRCPVTDNIRADTDIEVKVAKE\*

>SPBIB\_v1\_290035|ID:27163560|glT| glutamate and aspartate transporter subunit ; ATP-binding component of ABC  
superfamily [Uncultured spirochete bib]  
VEKYIEINNAVKSFGSVKALCGVSLTVKKGEVVLVIGPSGSGKSTLLRSVNRLERLDSGE  
IFIDGESVTDPNADIRHIREEVGMVFQSFNLFPHLTVIDNITLAPITVLKKTDEAIDQA  
RSLAKVGLSDKEKAWPEQLSGGQQQRVAIARALAMNPKVMLFDEPTSALDPEMIKEVLD  
VMTELAREGMTMLVVSHEMGFARAAANRIIFMDAGQIVVEAPPETFFTSPREERTRKFLE  
HIL\*

>SPBIB\_v1\_290036|ID:27163561| Polar amino acid ABC transporter, inner membrane subunit [Uncultured spirochete  
bib]  
MMKGSPLSGRDSKNPNQTTINVTGTLIPLKDEGSLLSAWNISFFGAVALLVILPLFSPD  
PYLRILSFVPDGLVATFSVTLISIFFALLIGLFAGLGRISQKLFINRIATVYVEVIRGIP  
LLVQLFYIYYALGPLLRKGPAAAILAMSICYGAYMAEIFRAGMQAIPKQMEAAALGM  
SRSMAMRKIIIPQTIIRIIPPIGNEFIALLKDSSLVSILAVSDLLRRGREYASTSFYFE  
SYTHIALIYLVMTLFFSRLVGMMEERLRHRGKVH\*

>SPBIB\_v1\_290037|ID:27163562| ABC-type transporter, periplasmic subunit family 3 [Uncultured spirochete bib]  
MKKSWPVFASVILIAIVALGVTSLSKAKTKITVATDATWPPMEYVDENKNIVGFDID  
LVNEVAKAAGFEVEIKNTAWDGIFAGLAAGNYQAIASSVTVTDERKATMDFSEPYVNAGQ  
VLVVRKNTTGVTTLADMIGKKVGAQIGTTGAIIEVGKVQGVELKTYDEVGLAFEDLANGNI  
DGVVADSPIAANFALQNASYKEKLMIVGKPFTEWLAFAFKKGDTKTQKLFNDGLAKVKS  
SGKLDLVKKWLQ\*

>SPBIB\_v1\_290038|ID:27163563| protein of unknown function [Uncultured spirochete bib]  
LAFAAAAFLRHLIQSHREVRGTIEFLGMRGFARALLRALAVSIFMLHS\*

>SPBIB\_v1\_290039|ID:27163564| conserved protein of unknown function [Uncultured spirochete bib]  
MSFNNDISLQRRPDAQPLELLSPERTMEIVLEALRELVEYELAVVMRLEAPDRLVVRKAV  
GPLYTPRLEGYSISLTRRQDIARLLEHKEPKLFGHEHAHIDTYDILDLPNGHSCLVAPL  
YIESTLIGLLTLDHRACNRFSPSIVRFISTISKLISVSMVQSDASRSLMEKTRELTEERN  
RLDESADAFRDLVGVSAVWRRVLDVRLVAVADVPVLLTGETGTGKEQVARKIHQLSHR  
ASGPFIAVNCSALVSSLAESLFGHEKGAFGAVAMRRGRFELADGGTLFLDEIGDLPLE  
LQPKLLRVLQDGKFERVGGESVAVDVRIIAATNIDLESAIAAGKFREDLWYRLHVFPIH  
LPPLRERDEDAALLAEYFVSQIRRRPGFESLALSPSAIERILATEWRGNVRELRNAIERA  
AILARGGSIFAHLVPATNAYQARQAQGAYQADSAATSASTAISEPSSMYFPPLDDALRA  
HIIAALKKSGGKIYGSNGAASLLGMKPTTLQSKMKKLGIRSSSFSAPPDTKP\*

>SPBIB\_v1\_290040|ID:27163565| putative peroxiredoxin [Uncultured spirochete bib]  
MEQQNFHMPLLGDDFPTLTLQTTQGVMLNPGDLKGRWFVLFHPADFTPVCTTEFVGFQR  
LMPEFEKLGVKLIGMSVDQVFSHIKWIEWIKEKLGVEITFPIAAANDSIANALGMLHPGK  
GTNTVRAVFVVDPPQSKVRLVIYYPQEIGRNMEEVLRVAVKALQVADKNNVAVPANWPNEL

IKDRVIISPAKTVTEAATRLKEYDGYDWWFCHKAL\*

>SPBIB\_v1\_290041|ID:27163566| Thiol-disulfide isomerase and thioredoxins [Uncultured spirochete bib]

VKPVQSYNEITQLIQQNEAVLFYCSAPSCGVCKSLKPKVIELVQSHFPNLPMYYYVDIDAI  
PEARQQLSVYSVPAVLVYFKGKELIREARNFGIMELGAKIDRYYSMIFESAV\*

>SPBIB\_v1\_290042|ID:27163567|hipA| regulator with hipB [Uncultured spirochete bib]

MPRLSKNRSLCIWMNGLYVGRWSINRQKGHEFYDASWLDSPPEARPVSLSLPLAPADFYV  
SGKIVESYFENLLPDSSTEIRQRIRARFGAASLSSFDLLAEIGRDCV GALQILPEFEVPGT  
SEVLEAREVNESEIESILNRITSNGPMFQAFDDAFRISIAGAQEKTAMLFHGGQWKVPLG  
STPTTHILKLPLGRIGAAGIDMSTSIENEWLCSRIVSSLGLATAKCDIARFGDAKVLVVE  
RFDRRFAHDGQWVLRIPQEDFCQANGYSSSQKYEADGGPGIVSIMKFLGSGNPQRDREA  
FFKAQIVNWLLAAPDGHAKNYSVFIERQGRFHLTPMYDIMSAYPVIGHGKNRIPPEHLKM  
AMAFVGNRHYEWDKIRLSHIRETARRCDYERDAEELLSLLSRVPGALSEISSTLPERF  
PESVAEPILNGMLKAAQRLAHEVS\*

>SPBIB\_v1\_290043|ID:27163568| Transcriptional regulator [Uncultured spirochete bib]

MTYLVTTHQLAMALKIARKTLGLTQAQAGALVGLLPKTISALENRPESCSVDSLFRLLS  
ALNLELSLSPKASSEPESTSMQAQEGW\*

>SPBIB\_v1\_290044|ID:27163569| Signal transduction histidine kinase [Uncultured spirochete bib]

MKLRVRLSMYFLLVICVVAGSSLIHQHTTENLFRSFIFSGDSEKAKIYATILADYYAEN  
KGWQDLQSFLSEIPQIAFSGIDRRIHGGQGTLRISGYPEKTISALLSDRIA VADKNGVIV  
ADTAAKILHTVHPASHLKYGIPIFANSEHVGTVLVGS MIDSSITGINERFLSSIVTSLIW  
GVLISAGLALFLGLIFSAQVTKPIVSLTGAVHHVAEGDLSIVVNAEGNDEIADLAKSFNR  
MIEELKRELENARKQIIADSAHEL RTPVTLIQGTIEGMIDGVFPIDIPTLKS VHEETVRLS  
RLIDMLRELEHIESGKLVLSLETINVM DILHKA EALFASSAKEKDIALSVDPDAPPLIK  
ADYLRLSEVIYNLISNSIKYTPSGGRVRLRTKNDEKRAVTRIYVEDSGPGIPAEERERIF  
ERFYRIDKSRSPDRGGRGLGLAIAREIVKAHGGNIAVTDSELGGA AFIIEMKAAS\*

>SPBIB\_v1\_290045|ID:27163570|regX| Sensory transduction protein regX3 [Uncultured spirochete bib]

VSAKILVADDEEKIAKMVATYLEASGFQPIAYDGLQALHAFREHLPDCIILDINMPGPN  
GLDVAREVRKTSSVPIIFLTARADELDRIVGLELGADDYISKPFSPRELVARVRILRRT  
MQSGKDTSQTELLRHGPIEIDLKRLVRVSGETKDLTTIQIDILSFLMREPGRVYSRMEI  
LEACIGSAYEGYERTVDAHIKNIKALGDDSDNPKFIATVRGAGYKFMEQPE\*

>SPBIB\_v1\_290046|ID:27163571|copA| fragment of copper transporter (part 2) [Uncultured spirochete bib]

MKLLTIEGMSCGHCVMHVKSAL EEPVGVAKAEVDLIKKSAMVEGEDLNDIALKHAVTEA  
GYRVSAIYGRH\*

>SPBIB\_v1\_290047|ID:27163572|copA| copper transporter [Uncultured spirochete bib]

MIKVAQM QINGMTCAACAQASERA VKKLPGVEEAAVNFATEKLFIFKFDGKLGIDEIKAA  
VAKAGYEAVELAAEKKHTQSHAAIDEHQA AKEREIRILWTKFIVSALFSAPLLYISM GAM  
LGWPLPAVIDPMNYPLRYALIEIALVIPVIAAGHRFYSVGFKAIVHRSPNMDSLIAMGTS  
AAILYSLFSLNIANGNFKA VENLYFETAGVIITLILLGKSLEAVTKGRTSES IKKLMGL  
QPKTATIIRNGIEVEIPIDEVEVGDII RVRPGEKIPVDGVIVTGRTAIDESMLTGESMPV  
EKEVGDKVIGASINKNGSITFRATKVGADTVL SHIIKLVEDAQSSKAPIAKMADIVSGYF  
VPVVF AIAVIAAVVWLLLGHTLVFALT VVAVLTIACPCALGLATPTAIMVGTGKGAEHS  
VLIKSGIALETAHKIDTIIFDKTGTITKGKPEVTDILPVKGFSEDEILGFAASA EKGSEH  
PLGEAIVHAAEEKGIALYEASDFNAVPGQ GIEATVLYKHVLLGN AKLMAANNIELGEGTS  
AADHLSAQGRTPMFIALDGT YAGLIAVADVVKESSAHAAIALHSMGIQVAMITGDSK KTA  
AAIAAQV GIDRVLAEVL PQDKALEVKKLQAEGRKVAMVGDGIN DAPALAQA DIGIAIGSG  
TDVAMESADIVLMRSDLMDVPTAIKLSKNVIRNIKQNLFWAFGYNVLGIPVAAGVLYAFG  
GPLLNPIIAAAAMSLSSVSVLTNSLRLKRFKPF\*

>SPBIB\_v1\_290048|ID:27163573| conserved membrane protein of unknown function [Uncultured spirochete bib]

MGMKRAVLFVTD MICSACETRIARAVKAIDGVIAVRVTLKGGRV DIEYDDEKTTSEAIKA  
AIENAGYTVGKNKNAPT MIAIGIFILVSLYIIANASGLFNAIPAIDSSLGYGMLFIVGI  
LTSVHCVAMCGGIALS QVAQLDGCQMRGDTSRVLLADEKYKNLIPGLLYNSGRVVS YTI  
VGGAVGALGSVFSFSPVAKGIIAAAAGFFMIFFLKMLGILSALPRIPR VIPAPIQNVAN  
RFSSALRN RGPFAVGLLNGLMPCGPLQTMQLYALGTGSILAGALSMFIFSIGTVPLMLVF  
SLAAAFIPKKFVPMVKASAVLVIFLGLITFSRAASLAGIALSGFPFFGSGLVQLSNGLP

EAQTVRQSENGTNGGFIKANLQGGVQTVLTDGSSGYLPLFAVQAGIPVKWTIRVTADGL  
NGCNNPITIPSYGIRKTLEPGDNLIEFTPEKEGVIVYTCWMGMVSSRITVVKDLAQANSL  
PGSKGLTPSDLLANGLQQSGGISGLSGCCTAQPVNQP\*

>SPBIB\_v1\_290049|ID:27163574| High-affinity iron transporter [Uncultured spirochete bib]  
MGAALLITFRETLEAALVIGITLAFLAKADLKHLKPAVWVGAAVGAASAIAAYLFIAIL  
GGFEGRAEQIFEGIVMLAGAILLTLLILWLNKKDMKAAMESRVMATASAGSFWGIALLAF  
VSVLREGIETVLFISSTRSSGLAGFLGAAAGIVLAIALGVAFRSGARMPLKNFFAVTN  
ILLLLFAAGLVGQSVHELNEAGIVPPFVEQIWNLNPPSNGEAYPALHEKGAIGGFLKGLF  
GYNGDPSLTETAAYLAYLISIGTILLRRNKLKSHYSR\*

>SPBIB\_v1\_290050|ID:27163575| exported protein of unknown function [Uncultured spirochete bib]  
MVMVTLIIRVATVVLVGMIVMLMPVAVMMMVITLAACLFWDWNKLHAAHRALARLVIGLVSL  
TFHETRVFHKSLMLPHNRIHP\*

>SPBIB\_v1\_290051|ID:27163576|copA| fragment of copper transporter (part 2) [Uncultured spirochete bib]  
MKYACLMKCEGNKTYDKPGKCPVCGMKLVPVEEASSQGNDDHHHDSHGHEHHDHTNKHGGD  
SDDQSHHDSHHNARNLCICGTENCDGRCVTNCQCTFQERNLAMPVPLAVSGKAEAYICA  
MRCEGDKTYPKPGDCPVCGMHLVKVVAFGAPSGEEDEEMAAFKAMRGKFIKLSALFALPV  
LFLSIGELIPGLGEFIGSLFSRKTNLLIQLVLSLPVVFWSASFYAKGIKSVISKNLNMF  
TLIALGTGAAWLFSVVSTLAPGIFPDSLKTADGFVPVYFEATVILALITILGQMLELLAH  
AKTNSAIKELLNLVPAEALVIRNGKEMKIPLAEVVVGDILRVKPGKIPVDGSLREGSGV  
VDESMITGEPVPVEKGGQDKVTGGTINTNGSFIMVAEKVGGDTLLARIVAMVNEASRSKA  
PIQLADTVAAAYFVQVVILISLATLFIWGFASFVSKWDHGIVNAIAVLIACPCALGLATPV  
SIMVGTGKGAKSILIKNAKAIEQMRKVDTVLVDKTGTLTMGKPAVTVVKGYSDSEDEV  
LRLAASVDRNSEHPLAAAIVSAADKGLALSPTTDFTSVTGKGAKALVDGRIAAVGNACL  
VREMLGEPATESNDDYERNLQAEGHTVMYVIEGDRIAGIIGVSDPIKESTPNVVKRLKHL  
GVHIVMLTGDNKTTAGAVAKSLGLDDFVAECLPEDKFETVKKMQAKGAFVAMAGDGINDA  
PALAQADVGIAMGTGTDVAMESADITLVKGDLTGIARAKALSVAVMRNIKENLFFAFAYN  
VLGLPIAALGLLNPIIAGLAMALSSVSVLSNALRIKGVKLD\*

>SPBIB\_v1\_290052|ID:27163577| putative sensory transduction system regulatory protein (modular protein)  
[Uncultured spirochete bib]

MKDRIHIRNTVKGNILVRYSLIAAAVAVTTIVTGVILVSVLENHYIRLHASLYAELSST  
VRGEKNSSEAFIILSRFPHVRSTAIWTASGASVMAPETGPLSGVGPLSRTAGKNAMNGA  
LKGKLGIVPAPNEGLVILIPILTHEGAVEGIVGLLEDDTELKDIQFVQLTVAATVMMSG  
VLLYALLFGIFLKANQEQQKAADRLRKTDFDVIIVFAMSSLSGLRDQETGGHLERTQAYTEV  
LLNGLRRSAKFRKTLDKDYIKDIITSAPLHDIGKVGIADSILLKKGKLEPGELESMRQHT  
VLGGDLLAKAANKLPFPSSLTVAESIRHHHERWDGSGYPDGLAGESIPLAARVVSLADV  
YDALRSTRPYKKAYSHEDAVRIIREGRGTQFDPDLVDVFANVESRFAEIFDTMKFD\*

>SPBIB\_v1\_290053|ID:27163578| putative Nitroreductase [Uncultured spirochete bib]  
MKGFLVSLLLAVTVFGAFAQDIELPRPAVKSGVDLLQAIKDRRVSKAFVKREVPASELST  
ILWSGLGMRAADAVSSATKAGRNISFSGDNAYINVYVLTEKGAWKYIPDITYKLDFAKGD  
LRATVSKASVPDAAIMFLFTVDNALMPSFLKGNPGIFQQMANATAGFAAQNMALVANTYK  
LATVVQYTLSPAGAASALRLGKDEAPLFIMQAGYTE\*

>SPBIB\_v1\_290054|ID:27163579| Amino acid-binding ACT domain protein [Uncultured spirochete bib]  
MKIKQINVVLENTAGQLFELAKLLHKGDIDIRSLFVTESEFSTVHLIVDKFDTAKRLLK  
EHGYFINEVEVFALKAEDRPGGFMKILEVLKANGLNIEYVYGFGEKSDNHAVFIFRITEI  
DKAIELLKSGAVGYLTADNVAGKRQGSSELIDDF\*

>SPBIB\_v1\_290055|ID:27163580| conserved protein of unknown function [Uncultured spirochete bib]  
MMIWGYGPGIFGTFGWGGIIMGLSMMAIPILGGVFLFRYFQERREEPPAWKSALEALRKR  
YARGEITEEYQKIKSIIKSEFENSLHSH\*

>SPBIB\_v1\_290056|ID:27163581| Hydrogenase large subunit domain protein [Uncultured spirochete bib]  
VPEVFERMRGLYTPCTDIRRKIFVGVTRFVLAGKKPEDIDYLPFDIIMMGKPTYRCCSYR  
ELSIVKQRIRLAFGLPLIEERDNTVPVSAGIGEAFDRKVISAPLVNVIRAACEKCPEDKV  
IVTDMCQSCMAHPCSIVCPVNAISFPNGGKAFIDQKKCVKCMKCVKACPYQSITRMVRPC  
AAACGVDAIHSDPDGYATIDQDKCVNCGLCTVSCPFAAISDKTEL VQILHQLMGPEDRRP  
YAILAPSFVQGFGRLASPGAIVAGLRAVGFGRGVREVALGADCDTLLAKRLAEKSSPDNP

QHKTFLGTSCCPSWVKTARRHFPEFADNIAESFTPMVETAKIIKDQDPSARVVFIGPCIA  
KKAEALEPEMQPYVDHVLTFEELAAIFVAKDIDLAEITPVEFPDEASALGRGYAVAGGVA  
TAAIETARQKYGKENIARADTLRNCRAMLADIKSGKTSPELVEGMACPGGCVGGPGTL  
IGLLSARNEVGKFAGLAPKNPATLTK\*

>SPBIB\_v1\_290057|ID:27163582| conserved protein of unknown function [Uncultured spirochete bib]  
MKPIKVRVCVGTNCCYAGSETLLDMLENDVDLSAFIEVEAVPCKNKACDGRNSPVVEIE  
NKVLLNATPEIVMEEIERLATARIIIEETQRA\*

>SPBIB\_v1\_290058|ID:27163583| conserved exported protein of unknown function [Uncultured spirochete bib]  
MKRVGVVSLLIALLIVAGALFAQGMGGNYGGSGMMGNWDYIPPGDAKPLSIEQAKDQAQ  
KYLWYDDTLVSEVMEFSNHFYVEIAEKEGKNAFELLLNKYTGAVSPEPGPNMMWNQ  
KYGRMTGSMGGNFIAQSETDSMTISEAKAHDLAQKFLDAQNTGLKVEDGADRFYGYTYI  
HVLKDGKTYGMLGVNGYTGQVWYHSHWGAFIDMKEFDGSM\*

>SPBIB\_v1\_290059|ID:27163584| Fe-S oxidoreductase [Uncultured spirochete bib]  
MEAATQEALKKLFESKLNKAMRLYLDTCAHCGLCVEACHVYQAMPETKYTPVGRAEVVRK  
LFKRYFKMQGKIAPWLGEVIELDDKSVNMAEAAFSCTGCRRCVTVCPFGIDTQQVMNIA  
KLLLIGAEKQPQILAMLSMSIAKGETWKETANDYIAALNNLAPEVEALAPTPPGRPAIP  
IDVENANVLYVGLSGKHSIVPAAAILNAASENWTISHFEAVNFAAWLGDGEKQRLIAKRI  
IMEAERLKVKEVAVVECGTATRVLKFMTGSHPFRIVSIVELIARYIEQGRIKVKPGTISG  
TLTYHDPCQLGRNGGVMEEPRYIIGKLTDFVELTPNKEANWCCGGGGGLISLGEHEFRM  
KTGKVKVDQMRASKADTICTACENCHTQLTELNEHYGLGMKVESLTNLVAHALTGFGA\*

>SPBIB\_v1\_290060|ID:27163585| membrane protein of unknown function [Uncultured spirochete bib]  
MDPQAVSAASQAVVHTGFALFLDKLYYFIMVPLVYISVIVMIVGIVAKIVSIVRAPIPAF  
SLKTYPAKKRPFLAALGDTFGMPMIRKEKPLFWFFLMMFHIGIFFLFFGHLDLFPQVNLN  
PPESRHMIGAGAVGLSVTIPTFYFLFRRFKQGERHISVPSDYLLLLLLLLLFIPLLGDMSIW  
GNSWTANGFVMTKADFKNYFGILKSFSFVDPRTVLHGSHYHFVVLHVFLAELFMMILPFT  
KIVHTFFSLPLNLLRRR\*

>SPBIB\_v1\_290061|ID:27163586| putative redox protein, regulator of disulfide bond formation [Uncultured spirochete bib]  
MSDYTVAKTLDCKGLACPMPIVRLSQEIAKIKVGEVIEMFTTDPGSLADVPSWAKSTGNA  
VLENKQESGVIHFFVKRQK\*

>SPBIB\_v1\_290062|ID:27163587| conserved protein of unknown function [Uncultured spirochete bib]  
MDIEKELADIKAKLEAMPGKENKLSMVFSGDLKQIAALIIATGAAAMGMKVVLFFYTFW  
GTSALRDPAAKKNVNGKSFMGKMFGLPKGRNKLKLSQMHHMAGMGTAMLKDLMKKNVASL  
DQLFEAAGMLGVQINICQMSMDLMDLKREEMIDYPHLNVCGVATFLNDAKESAIQLFI\*

>SPBIB\_v1\_290063|ID:27163588| Biofilm growth-associated repressor (fragment) [Uncultured spirochete bib]  
MADLKHDASRAAVIADLLKALAHVPRLRIVALLIENEATVSALEQLLGVVQSVVSSQQLRI  
LRMADLVQYRRVKGFATYSIKQPRLVDLIHCLEGCRTGDL\*

>SPBIB\_v1\_290064|ID:27163589| Methylenetetrahydrofolate reductase [Uncultured spirochete bib]  
MPVIKMCQRNMSKALLCFPESNIYAVLCTMKSILQVIKEGRPVLFDGAMGTELYKRGVF  
INRCFEEANLAPELVLSVHRDYRDAGAEVLTNSWGAGRYKLARHNLQDHVQEINKQAA  
SLARQVAQDSLYVAGSVGLPRLPVGALSEHDALDAFREQMEALIGGGVDFILLETFG  
DAAEAAQAVRAARSIATSPVVFASMTIDMSGNPLFGLTLEEAMDRLEAGADVIGLNCV  
GPQPMRLAAKRMHSHRSDIPLLEPNAGMPRQIEGRMMYMSSTPEYFATYTKYYLQEGVRF  
VGGCCGTTDPHIRSMARTRVQYRAMCKDHDFAEGECAGKGLGDRGPGGRGPSEISGAGKI  
VSFVPIGSKSGGAKPEAGKAEVERIPFAEKSQLAAKLARGQMVYSLELVPPSGTTLDTII  
DKARIAKQAGIDAINIPDGPRATSRVSTLVTAIMIEQQVGLLETILHYTCRDRNLISMQAD  
LLGAHAIGLRNILCITGDPPKLDYDPDATGVFDIDSIGLTRMIYRLNGGFDISGKPIGKP  
TGLSHGVGVNPGRAFETEMERFRKKIDAGAEWAITQPVFDRAVMEEFLDYIERNGLHIS  
IIMGIWPLSSLKNALFMKNEVPGIEIPDEVIQRMEHCASAESAREEGVAIARELYESLKG  
SIQGVQLSAPFGRIDLALRVIGK\*

>SPBIB\_v1\_290065|ID:27163590|metH| homocysteine-N5-methyltetrahydrofolate transmethylase, B12-dependent [Uncultured spirochete bib]  
MKRSEKYALLERLAFERILILDGAMGTMIQRRRLSEADFRGQRFADHPVNLAGDNDVLCL  
TRPDVIRDIHRAYLEAGADIIETNTFNATAISQADYKLEPWVREISRAGASLARQACDEA

QASNPKKPRFVAGSIGPTAKSLSIAPDASDPGKRAVSFDEMAAAAYRECALGLIEGGADVL  
LIETVYDTLNAKAAIWAHISVFRELGKELPLMISGTIADASGRLLAGQTARAFWHSIAHA  
EPFSIGFNCSMGAESLLPFVEEIAEEAECAVSLHPNAGMPNELGEYDDSPENMARVLREF  
ARGVEKNERHGANIIGGCCGTTPEHIRAIAEALDGIRPRFFRPKTFASGWSSHQKHSVLA  
GLEPLDISPETLFFVNIGERTNVAGSRAFARLIREGKLTEALEVARAQIEAGAQIIDINMD  
DPLIDSANTMARFLDLVAEPDIARVPVMLDSSNWNTLLEGLKHLQGGKIVNSISLKDGE  
ETFLGRARTIRRLGAAILVMAMDEHGQAEDYERKISICERAYRLLTEQAGIPAEDIILDP  
NIFAIGTGIEEHRNHAVDYIAAVAWIKRNLPGALVSGGVSNSLFAFRGNEALRSAMHAVF  
LYHARAAGMDMGIVNPAQLVPYDEIPDIRERIEDLVNRRPDAAERLIEVAAGLSGSAS  
GQPGEASEKLSPKDRVIHALVSGKSETLKDDIEELRRQYARALEIIEGPLMEGMNKVGS  
FGEGKFLPQVVK SARVMKEAVHILQPYIEAEQAGQPSSRGKILLATVRGDVHDIGKNIV  
SLILSCNGYEVIDLGVMSERIVEAAIEYRVDAVGLSGLISPSLEEMGRVASLMEARGL  
HIPLLVGGATTNPLHTALRIAPEYSGPVIHVGDASQAPGVMDKLLSEGRNSYLEQVRME  
QENTRTRYQEGRELVRYVSLEEARNASASNLVPPVRPHEPGPAVLAFKVADLVPMIDWS  
HFFRAWGLKGRYPDILQDPQKGEEARRFYRDAMELLERAARSGLLEVKSVFGIFPAARAQ  
DDILIYAGEDRTSLRARLPCLRQQRFKPEGGYLCLADFLQAAESGKPDWIGAFVAVNAGGN  
LEESKIALDAKADDYRALLIASLADRLAEASERLYMLVRDAYWGFCSGVEGIRPAPGY  
PTCPDHRDKALIFSLLDVNQRIGLSLTFESFMMRPASAVCGWYFASPSARYFSVGKIGRDQ  
VEDYAARRGEPPEVAEAWLIGALNYDPSAKASSENIPACPSCLRPR\*

>SPBIB\_v1\_290066|ID:27163591| conserved protein of unknown function [Uncultured spirochete bib]  
MSKGAGRPHRGAPVRERFYRDTMGKRFRSWTIQYKESDLWIGVSPESWSPGMEGTAIAAL  
MDARKQIEGYGRSRKSAANFFETLAPMDDDLAPPVVRAMLQAGLKAGVGPMAAVAGAIA  
EHVGRALISAFGCKEIVENGDDLWLAFFSSPLEIAVFAGNSPLSGVLGIEIQPELSPCGL  
CTSSGTVGPSSFGYADAAVILCRDAATADAWATAAGNMVQTADDIEPALASLRKASEVL  
GALIVVGDRMGMQGCFLKPLPKGHN\*

>SPBIB\_v1\_290067|ID:27163592| NIL domain-containing protein [Uncultured spirochete bib]  
MKEKYILEYTEQVVEEPIIYSLVKHFDVKVNILRAEISPGREGSMLVEIECEPDSLARAE  
AFLNEHSVRMIPAEISLGFQEQEACIDCGACTAVCFSGCLTIGEPDWKLHVDRSKCIACGL  
CVPACPLGLFTLKFGD\*

>SPBIB\_v1\_290068|ID:27163593| conserved protein of unknown function [Uncultured spirochete bib]  
MQKTYEEINEKIARGEAVVLTAEEVARMASELSPAIEAARVDVTTATFGAMCSSGCFIN  
FGHPEPGLRMESVSLNGVPIFGGLAAVDA YIGTTEVSPSNPCYGGGHLIEALVRGERLVL  
EAHGKGTDCYPRRSARTIIDKDNVNEIIMVNPRNAYQNYPAATNSSNRIMYTYMGTL LPR  
FGNITYSTSGELSPLLNDPELKTIGIGTRVFLAGAQQGFVSWNGTQFNTEKPRNEFGLPVS  
NARTLMLTANVKKMDPAFIRAA YFER YGVSLFLGVGIPIVLDIEDIARSVSVSNQQIQT  
ICDYAAPGHPGIAKVS YAE LRSYVTLEGKKIRTAPLSSLT KAREIAEILKKQVASGLFP  
LAPPVQSLPDHAVVRGLRVEGDAI\*

>SPBIB\_v1\_290069|ID:27163594| Small GTP-binding protein [Uncultured spirochete bib]  
MNPSSENPAHARATNESPLSESIIVIA GIRNAGKSSLLNTLFEKEVAIVSPVAGTTTDP  
VVRKMELPGLGPVAFIDTAGIDGEGELGAMRTQKTKARLASSIVVFASPAHRAPQPQEI  
RFLEQLKSSKKPYISVLTHADCGFDA AKLQWLSKEQYIAVDNLKGYGAAEVRKALSALKD  
IVHFEPSPLEGLVQEGDTILLVAPVDLAAPKGR LIQPQVETIRDGLDRDCTV IIVKEREL  
LETYNRLMEKPRLVITDSQAFSKVAADIDPDQPLTSFSILFARKKGELDTFLRGISALNN  
FPAGGHVAVMEACSHHRQADDIATVKIPRLFQQLVQPNARFSVARSLEVVKTMPCDLIIH  
CASCMLNETAVHARIEA IAGLGIPVTNYGLFFAWANGLLPRALEPFPEYEMVYRPFRRNG  
HAT\*

>SPBIB\_v1\_290070|ID:27163595| Aspartate ammonia-lyase [Uncultured spirochete bib]  
MYGEQTRHAVENFGRGQTPRDFIAALAEVKKAIFTA IQESEHRYAPEVYAAICTAIEEIR  
CGLHDAAFPLPLAQGGAGTSLHMNFNEVLASLVQSR TNVPFHFLDEGARYQSTNDVIATA  
VIIVACRRLREIEAGVIALQEALVAKEQAWRGIVVTGRTEWQDALPMSLAQVAGAWAGAV  
ERDRWRLHKIKERLRTVPLGGTAIGT AFFVPPEYLFLAEKHLRAITGLPLSRSQNL PDAI  
ANQDQLAEVASGFSLVAGTIKLCNDLFFYTSSAVREL VHP SLQWGSTIMPFKTNPVMIE  
YAKGLAMRANA YCSAVMQYAHEGNLQLNAFLPFILDGLLHASDDLGEALRALSEKLLPRL  
EASVTKIVYNLHSSLALLNALRAVVPYEALKTFYESHCKEGACFPFASIEELVRTLSKES

GIAEEILYSQLEAFAPTKPGAMSAPPEKP\*

>SPBIB\_v1\_290071|ID:27163596| Radical SAM domain protein [Uncultured spirochete bib]  
MSSPAFLPQLTEQEVRLAQLPLEDLTPRAHAVSLEYHGTSVFLRGLIEATNHCAQNCLY  
CGIRRNNAKVRRYRLSREEILAIVERGFAFGFRTFVIQGGEDPCYTTEFLASLCEEIKNR  
TAGKAAITLSFGTKSLAAYRSLARAGADRYLMRFETADPVLHEKLRNGNSLASRLKALDC  
IRESGLQVGSFGMVGLPGETEETLIQNIMLAGKINMDMGGVGGPFIPHPDTPLRCAVQKPI  
ELAIRATALLRLMLPHCHIPATTAAGSLDPLGREKMLAAGANVLMPNITTVEHKKDYQLY  
PGKICIDESGFQCVSCQAMRIASVGLSISWDRGDALRLKERSHVW\*

>SPBIB\_v1\_290072|ID:27163597| Biotin and thiamin synthesis associated [Uncultured spirochete bib]  
MLTATQTFLDYAKLEELSGLSAPSFAQVEKILAKAKRLKGITTEEAALLAVQDPAQLSL  
LLAAAHYIKKEIYGKRLVLFAPLYTGNFCTNDCLYCGFRRSNHSLERKRLTMDEIAQQTS  
ELLKQGHKRILISGEAGNQSLEYTLEAIQTSYSVREDTARVRRINVEIAPLSVEGFRAL  
KKANIGTYVCFQETYNPELYAMYHPDGPKADYRNRLYVMDRAMEGGIDDVGIGALFGLGN  
YRYEVLAILHAHLEAAFGCGPHTVSVPRIEPAKGAPLSFNPPAPVSDIDFKKLIIVIR  
ISLPYTGILSTRESPALRKEIFAYGVSQISAGSKTDPGGYSAHKEDNGQFSVGDNRTE  
EVIDLIDDGYIPSFCTGCYRRGRVGADEFMDLAKPGLIKEFCLPNGLVSFAEYLYDYASP  
PTRQKGLALIEAMKTTAPAKVAHVLDKALLDTASGERDIYL\*

>SPBIB\_v1\_290073|ID:27163598| conserved protein of unknown function [Uncultured spirochete bib]  
MEKRIGVVAILIEGRDNIPAIN SILSNHSDIINGRMGLPFKDRGVQIISLIVEGNPDQIN  
ALTGPLGRLKGVQVKSILTRAIGDDADAHRDTNFS\*

>SPBIB\_v1\_290074|ID:27163599| conserved membrane protein of unknown function [Uncultured spirochete bib]  
MNKDKASYSFVFLVLSIFLACLLISNIIAGKLILVFGMVLP S A VILFPITYILGDVFTE  
VYGYEKTRSIIWIGFAANMLMSMIFMIAVALPYPGFFKQSA YATVLGLTPRIVLASLIA  
YWAGEFANSISLSILKCLTKGKFLWVRTIGSTVVGQSFDTVLFISISFAGNVPLSVLLQM  
MAAQYLFKVAYEAVLTPFTYKVVGYIKRIEGIDTFDHGVEYNPFKLGAK\*

>SPBIB\_v1\_290075|ID:27163600|queF| NADPH-dependent 7-cyano-7-deazaguanine reductase [Uncultured spirochete bib]  
MAEYKFEILGKKVSEPMRKLETFPTPEHVKKVVLDCDEVTS LCPVTGQPDWETVRIEFEP  
DKFCIESKSLKLYLWSFREEGAFCELSARIAQDIFDVCKPRWVKVTV AQKARGGIAITA  
ESRIPDLEQGAGA\*

>SPBIB\_v1\_290076|ID:27163601|ribD| fused diaminoxyphosphoribosylaminopyrimidine deaminase;5-amino-6-(5-phosphoribosylamino) uracil reductase [Uncultured spirochete bib]  
MHEFFMQSALDLARKGTGLVHPNPLVGAVLVRDGEIIGRGFHAFYGGPHAEVMAIDNAIL  
SGNTDFSNTTLYVTLEPCCHF GKTPPCTSLILNSGIRSVVVG MEDPNPLVAGKGIRILKE  
AGIDVEVGILEAECRELN RVFITYITTGKPFVLLKSGLSLDGKISTASGESRWISCEESR  
KDVHRLRSEYMAIMCGIETVLSDDPALTVRMVEGRNPIRIIADSHLRIPMDSNIVTTAHK  
IKTIIATTEDSDTAKAEKLDAGVHLYTRQTEGHVDLQKLM TILGQMEIDSILLEGGGT  
LAFSALKAGIVNAVRFYMTPVLLGGQRARTVIAGEGFSALADACKIENIRIGSCGSDILI  
EGTVCSPA\*

>SPBIB\_v1\_290077|ID:27163602|ribE| Riboflavin synthase [Uncultured spirochete bib]  
MFTGIIIEVGYVRSITRGAHSARITLAHTVCQGTRLGDSIAVNGVCLTVTEISSSVFVS  
DIMAETLQRTTLGELQCGDAVNLERALTLATRLGGHLVSGHVDGAGTIRSILKEGIASIL  
EITCPELLKYIAVKGSIALDGISLTVCGVSDSSFSVSLIPHTQM QTNVYLKKVGD TLNI  
ECDLIARYVEKLIMSKIPDEAEHPRPVLTEELLRLSGFIGGEL\*

>SPBIB\_v1\_290078|ID:27163603|ribBA| Riboflavin biosynthesis protein RibBA [Includes: 3,4-dihydroxy-2-butanone 4-phosphate synthase ; GTP cyclohydrolase-2] [Uncultured spirochete bib]  
MNSVEEAIRAFRAGKMVIITDHEDRENEG DVCIDAQFATPEVINFM AHFACGLICVPMEQ  
RRLELELQPMVHHNEDNHGTAFTVSDHIETATGISA FERAHTIQKLIDTSCGPADFRR  
PGHIFPLAGRTGGVLERQGHTEAVLDLVKLARSEMPASSNTAIAGVICEILDSDGTMARQ  
KSLENFAKTHNLCMISVADLVRYRKDREGGITRETETILPTEYGNFKLVGYTENATGKEH  
LALILGDISGDEPVL CRVHSECLTG DALGSLR CDCGEQYKEAMRLISRQGRGILVYLRQE  
GRGIGLINKLKAYALQDTGIDTVDANIHLGFPADMRDYRIGALILRDLGVRSVRLMTNNP  
QKIESMEQNGIKVFQRIPLHIQANTYNK FYLR TKQERMHHQLETLQILNRS AK\*

>SPBIB\_v1\_290079|ID:27163604|ribH| 6,7-dimethyl-8-ribityllumazine synthase (Lumazine synthase)(riboflavin

synthase beta chain) [Uncultured spirochete bib]

MKIMEGNLIAQHIRIGIVAGRFNEFIVSKLLEGALDGLKRHGIDDTNIIMAWVPGAFEIP  
LVAKKLAERTDIDVVICLGA VIRGSTPHFDYVAAEVSKGVAQVSLSSEKPVIFGVLTEN  
IEQAIERAGTKAGNKG YDAALS AIEMANLMRALSE\*

>SPBIB\_v1\_290080|ID:27163605|thiC| Phosphomethylpyrimidine synthase [Uncultured spirochete bib]

MYSTQMDAARKGLITEQLRLAA AWEQLDEEVLRALVAQGKAVIPANKRHKNLVPRAIGRT  
LKTkinvnlGTSRDCSDQEAEMEKVRTALALNADALMDLSSFGNTHSFRKRLIDESPVM I  
GTVPIYDAVVYYNKPLREITAEEWLATVRMHAEDGVDFMTIHCGLNRATAERFKKNPRLT  
GMVSRGGSLLFSWEMMTGKENPFYEHYDELLAICREYDVTISLGDACRPGSIADASDAVQ  
IEELIVL GELTRRAHDQNVQVIIEGPGH MALDEIAANMKLEQRLCDDAPFYVLGPLVTDI  
APGYDHITAAIGGAVAASAGAAFLCYVTPAEHLRLPTLEDMKEGIIASRIAAHAADIAKG  
VNGAREWDNSMSQARKNLDWKEMFALAVDPEKARRYRAESKPELEDTCTMCGKMCAMRNI  
NTIMRGEEVDVI\*

>SPBIB\_v1\_290081|ID:27163606|thiD| bifunctional hydroxy-methylpyrimidine kinase and hydroxy-  
phosphomethylpyrimidine kinase [Uncultured spirochete bib]

MSSSSMRHVLSIAGSDTSGGAGIQADLKTMSACGVFGMSVITALTAQNTQGVQALHQVDA  
DFVGAQIDAVFSDIRVDAVKIGMLGTLAVMKVIGKRLRWYRPKWIVVDPVLQAKNGYPLM  
EDTAKDIFLSEIVPLADLITPNLPETAALAGFVPQTMAELESAGKKILSLGAKAVLIKGG  
HRKTDADDVLTN LGVHVFKGERLTSQHTHGTGCSLSSAITAYLARGLTILEAIERAKNY  
VRVGIEHGLNIGHGIGPIHHFYNYHGVEPQL\*

>SPBIB\_v1\_290082|ID:27163607|thiM| hydroxyethylthiazole kinase [Uncultured spirochete bib]

MNQTNFEAMNLADVLENLRSSSPLIHHITNAVTINDCANITLALGGSPVMADSPEEASEM  
VGFAGALVINMGLTHPSAILSMEIAGIRAREMGKPVIFDPVGAGATQFRRNTAEELRKY  
RPTIIKGNASEIKFLAGEASNQRGVDSL DSEADQAAIALARSSGAIVAATGAIDT VTDGK  
SMYKIGGGTAMLGRITGTGCMTSSLVGCFC SVMSSHLFAAILGIMAMKLAGEKAQKALKP  
GQGTGQFRINLFD AISLLTPSDFLWKERITYVTL\*

>SPBIB\_v1\_290083|ID:27163608|thiE| Thiamine-phosphate synthase [Uncultured spirochete bib]

MLRFDSSLCLITDRSFCPKADFFPILETAIDSGVTWVQFREKSGLADREMFELGQKVREL  
TARKGVPMIVNDRDLAMALDADGIHLGQGD LPLWAAKKLWRPDKIYG VSAQTLEQAEKA  
LHDGADYLGIGALFPTISKND AIMVHHRQIELIRMLGVPLIGIGGITPERIKDIRRFGFS  
GIAVISAIWGAPDPAKAVKTFVQQWKDV\*

>SPBIB\_v1\_290084|ID:27163609| Haloacid dehalogenase domain protein hydrolase [Uncultured spirochete bib]

MLTSKAVLWDKDGTLLDTFGSWIDVERKLA EAMAAEYGFSSVKEQDYIQRVLFRLGVKPD  
GTVSGQGVLASGTSEAIIGEFYSAFLEMDSFISEKKQSFFSLAKSKLAEILEQSPITPIP  
AQGAQEALRFFKDLGLCQGLATSDSLANAQRDMAAAGFLDYFTFIAASDTIEQPKPHPCS  
VYAFADFCGVFPSEVLVIGDTPADEAMAVAAGASFVAVLSGTGVVQDFSPKANVVDLLD  
LPGFFALPPFCIFSSSRMPRRN\*

>SPBIB\_v1\_290085|ID:27163610| conserved exported protein of unknown function [Uncultured spirochete bib]

MKYLSTQNRKARRTYLAAGILILFTASCSTQPAPIGQASLPPSASASSPQAKEGVMYSM  
ALPQSSAGPLAFVAQTGLPGSNGQTAALGSQPEFNTEEYQRIVDNPFRNTLGNPVSTFSI  
DVDTASYANVRRYLMESRKLPPKDAVRIEEMINYFTYSYAPPTGEHPVAATLTMAPAPWD  
PDHWLLRVAIKAKEIETANLPPSNLVFLMDTSGSMDEDNKLPLLKQSLKIMVEKLRPQDK  
VSIVAYAGTAGLVLDATSGAKKETILSAIERLEAGGSTAGGAGIKLAYEVAKRNF IQGGN  
NRVILCTDGD FNVGVSSTSDLERMIEDKRKENIYLTVIGVGTGNIKDSRMESLADKGN GN  
YAYIDNLLGK KVFVKELWGNIFTVAKDVKIQIEFNPAIVSEYRLIGYENRLLAREDFND  
DTKDAGEMGSGHAVTAFYELVKRGLDPQLNDLTFQQITIVPSNDVLIFKLR YKTPGDGQE  
ASKLISMRFDQQALYKEFAACDDDFRFASAVVEFGMLLRDSPYK GSSSWKSAMDRARAAK  
GADPDGYRAEFVKL VEMAELVAGE\*

>SPBIB\_v1\_290086|ID:27163611| Radical SAM domain protein [Uncultured spirochete bib]

MAELMVGLRKTSLVDYPGRIAATLFLPGCNLRCPWCHNRELVEPQGFAAAQNLNINEAHF  
RAATQNFSVTGAQSPAQAPENAPALIPLSQALDIIQKRKNVLGGIAITGGEPTLRPELPD  
IVAAIHRLGLDVKLDTNGTLPLSLEKLLREDETRPDYVAMDLKLAPDRYRKL LPPGGRLSA  
HKLAAHEPQKMSDEDSHASPGQNLRRSVELLRQYGIPHEFRTLALPGSFITEKDIEELAA  
LVDESPWYFAGFRGGNCLDPQWDLLKEPAPSEVEALVQVARALGKHAMVVRGV\*

>SPBIB\_v1\_290087|ID:27163612| Anaerobic ribonucleoside-triphosphate reductase [Uncultured spirochete bib]  
MFNEIQSSAKSTVQKPQYVVKRSGALEEYDAAKIKSALQKAFAAVGFLVSAPETQERIDR  
ITSFVEELVTQLLASRHPHSIPAIEEIQDLVETALIESKEVSVAKAYILYRARHEAIRDT  
RKLLEDIDATMDGYLNQSDWRVNNANVNYSLGGLLHNSGTITARYWLKNIYSEEIAEA  
HRNADFHIHDLMSFSGYCAGWSFLQLIQEGLGGVDPKIRSKPARHLSTLMQQA VNFLGCM  
QNEWAGAQAFFSFDYISPFVKEDHLSDEIKQCLQSFIFGVNTPSRWGSQAPFTNITLD  
WVVPEDMKNMAAVVGGTMMDYTYGDCQEEMDRVNRAFIELMLEGDADGRGFQYPIPTYNI  
TENFNWSDNARLLFEMTSRYGTPYFQNFVNSDLKPQDVRSMCCRLQLDKRELKRRGGGL  
FGSDEFTGSIGVVTLNLPRIGYLAKDEDDFFRRLGKLMDLAKESLVTKRKVISRLLDAGF  
FPYTKRYLKHLDNHFNTIGIVGMNECLLNFFSKDVTLATEQGQAFALKTLQYMRDRLVAY  
QEATGELFNLEATPAESTSYRLARHDKERYPDIITAGTAEPYTNSSQLPVMYTNDFDA  
LDLQEELQRAYTGGTVFHAFLEAIDWRTCRDLVKTIAYSIRIPYFTISPTYSICPTHG  
YLNGEHFSCPVCGAETEVSRIYGYRVRNWNK GKREEYKERKMFALKAD\*

>SPBIB\_v1\_290088|ID:27163613| conserved protein of unknown function [Uncultured spirochete bib]  
MPESLKLVLHVAQVDKWEGAISNAANFLKPAAPGEHLEIRIVANSDAVLACAPCSPKLE  
LLEMLTKHGVEIFLCKNSLKKHGIPADSLPILKTVPAGIRTLVDLQNEGWRVYVRP\*

>SPBIB\_v1\_290089|ID:27163614| conserved membrane protein of unknown function [Uncultured spirochete bib]  
MAKKMPRIQLIRRISLGIFLVAVTVLTLHQQVQNMPSIDALDPFGGIETLFKYLAGEF  
IKKIVPANIVLLVGIILGVLSRFFCGWICAFGALQGVFGWLGGKIFKRRFVVPKVDV  
VLRWAKYPILVAIVYFTWKTGTLVIRPYDPLAAYGHLSAGLSAVWAEFAVGFVILVTLV  
LSMFYERVFCKYVCPGLAVNAILSRIPLFRIKRITTCISCARCDKACPMNIDVSHADTI  
SSPECIACMECVSACPTKKNLVTTLAGKTVAVGKIAALGLAIYLGTMGVGALLGKLDVF  
GPTLSQKATSGTLAIGDIKGSSTWAEVATAFGIDLERLYREAGVDASKVPPETKLKDTGA  
LIGKTFEADTARFAVSKITGIPYAGENAAPASPAATPSGAAPSSAEPTSAAPSSSAAAAP  
ASPTPAAAPAAVSPVPAPTSTPANAAQSSAPAASATQLTVPPDFALEGTMTVKDIAAALK  
TSEVAVIKQLPADFPDTPDKPLRDLKDQYGYTMTVLKERFAK\*

>SPBIB\_v1\_290090|ID:27163615|palH| Alpha-glucosidase [Uncultured spirochete bib]  
MKLVLIGAGSAQFGFGTLGDIFSSKVLKGSIALVDINGESLSRVQAAGQAFIEANGLDF  
TLAHTDRREALKGADFVVISIEVGNRFELWDQDWMIPLOQYGIPQVYGENGGAGGLFHAL  
RITPAILDICEDCASLCPDAFVFNFSNPMATAITTVLRKFPNLRFIGLCHEIASLERYLP  
LMLDVPFSELELRAAGLNHFSVLVSARYRTSGKDAYPDILAKAPAFFEKVLGYSDILEYI  
QTTGNIPRTEGETGLPDIGRTESSRAWSDRGLFRHILERFHLLPITSDSHIGEYIQWAHE  
VADHKGILDFYMLYRASLSMLKPTIELKVKERVVPIIEGILGDTGYEEAAVNIMNTGLIP  
SLPDSVAVEVPARVWRKGLEGIAFPDYPKGFAALLRNYTGVDLTAEAILQKSKDLAIQA  
LLVNPVVTACARVPELVNVMIERQAQWLGYLK\*

>SPBIB\_v1\_290091|ID:27163616| Transcriptional regulator, LacI family [Uncultured spirochete bib]  
MVTIIDVAKAAGVSPSTVSHVLNGKRPISDATKKRVHDAIVALGYEPNPNAQALRSTSSG  
IIAFYASDITEVFSTLIIQGAERICRENNYIMIFASGVEFNNDIAEAMHFLKRRRIDGLI  
VSFGIRKRIENRLPKALDFPVVSINARVSDDIPSIQPDYSGGREARYLLQRGAKNPAI  
IGGPESRLASEERIQGFVDEMAAQSIQFDRDKMIVYGDFSFDSGRTCMATLLQRDRSIDA  
VFCANDYMAAGAITEAQKQNIQQLRIVGYDNREFDWFVPIPTTFSPLAEMGEKGA  
STLIRMIKGEKPEPFHVVIPSSLVTRASS\*

>SPBIB\_v1\_290092|ID:27163617| Glycoside hydrolase family 31 [Uncultured spirochete bib]  
VKLEIKHLSKLSIRNSKAEIYGENGALFITPFSNFFHIEYKIGFSRDLTSEADQNLASEF  
DVPTINCCNFESIKELEDRFVVFQNDARLEVLKETAVVSVYWKNNLAFGGTIGNSDTVLP  
KFPLRIRYESQKAEHQGIGEEWPAQFNFRSEPDIFFGLEKTKGLNKA YRRFKMFNRDA  
LGYEPEYSDPL YISIPFYFQESRRHSTIAGVYFPSEAVEEIDFLVESNFYTAVSMAGPY  
AYIVFVGDYKEILAHYLTLVGTPALPPKFAFGFFGSSMSYAEPKDAQKILEYFQKVEE  
YGIPCEGMYLSSGYIKAENGRRYTFLWNTAKFPNPKEFIQSIRERGRYRLCCNVKPGFLLD  
HPWYEALKTKGYFIKNTLGEAAVEYYWGN YASLIDFSKEEAYNWWKEQIKKAFLELGILG  
IWNNDNEFELEDDEIQMTKTLPLVMSKASYEASQEVFSGKRPWVISRSGFTGIQKFSSTW  
TGDNVSDKSMIMNIPMGFNLGLSGLFFYGHDIGGFYGPRPGKDLLLRWCQSAVFQPRFI  
MHSWNPDPGIPTEPWLYPEILDAIRGLRLRYKFLPYIYSSAIRSVLESVPLEIPLWLEFF  
SDDSLDVDSANHLVGDALLVPPQSVGEHTIDCRFPQGTMWLSSDLATWYWGGSSTVQM QY



PEQEPLFFFRAGSAIPFESRQSGPLEGYSDSVHVLIIPIPAELTQSTVFHVYEDDGLSEM  
QDGSYNCFEFVQHKLGDTSVQLSITMKSQAHNAPKPRTLVLSLPPGYGFYDSPAGASTNS  
ECTMKLFSKGQTESVRIVKLPDSWSSALI\*

>SPBIB\_v1\_290093|ID:27163618| putative Sugar-binding periplasmic proteins/domains [Uncultured spirochete bib]  
MKRRFLLASIFLLVVGIFAFGQAQKELTALWFYDDPSELEFLNKKAAEYSTSHPGVTIKV  
NTVAYNDLFTRLTQLVAGNNPPDIVKLTDIRPEIEPFILDLSKYHGKDFLKPFIGVAAA  
LNREGRILGAPLDVTANGIILNKTLFDKAGVAIPSKEKAWTYNEFLQAISDVKKKTGALY  
ALVWDVTPHRWSTYLFENGGSFYDSTGRKSNFNSPAIIQALRGFADMFDKGYIPKSIWIG  
SENPRDMFFSGQAVAWMSGSWQVKAMLDNIKNFEWTAGPNPYVTTRSSVLGYKVFSAFST  
SKYPDIAADFIKFFTSKENNSDYAKSLMTIASRTDTGTINYGNAQASSALNNLAYELAIS  
PLPASTDIANPVMGYVWNTVKENVIAVLTTKTKTAEQAAAAINAQIEDSLRIVYGK\*

>SPBIB\_v1\_290094|ID:27163619| Permease component of ABC-type sugar transporter [Uncultured spirochete bib]  
MSKRKIPIAPYIFIAPAILIFLLFIVVPAMEGFLQSLFTRGIIIVRQDIPALRSRFVGLFN  
YQKLVSDPRFLTAFGKTILFTLITVPSIMVVSLSLALLLQEKIHGVGIARAMVYWPMSIS  
PIIIIGIAWRWILGYDTGILNYFLTFLFHIDKQPWLIDNARAFISVIVVSIWAQTGFFMVIF  
IGGLNTIPDSYYEAARIDGANKWQQFSGITLPLLRPTLLVLVLSTINAFKVYQLVTVLT  
SGGPGRATAFLVQNIYEEAFSKPLSVGYAAAQSVVFFFVMLLSIAQFKLSKEESV\*

>SPBIB\_v1\_290095|ID:27163620|MalG| Sugar permeases [Uncultured spirochete bib]  
MKSRLVIGFLKYLIVIVSVIFFFPMLWVVISAFKGESEFLNPPRILPVHFTLDNFKS  
GLKFGNFTQYFVNSAYVTITSTIITVIISTMAGYGFKFKFGRDVLFIGVMATLMFSLE  
IIMIPMFLTCLKGYGLINTFIGIIPPAATPTGIFLLRQHMR SIPDELLEAAKIDGAN EYQ  
IFTKLIVPLSVP AISTLTIFSFWRWNDYLPFLVINDDKKRTVPLALANFVGGQYAVRWG  
DLLAMTTLSIPTLIIFLIFQKYFIKGISMTGLKG\*

>SPBIB\_v1\_290096|ID:27163621| putative LmbE family protein [Uncultured spirochete bib]  
MPSSIERIDVLVIGAHPPDAEIGAGGFLLAAKNRGYRTGIVCISDGSAGASGDVSQRKRE  
AENAAFVLKIDALHFLGMEDLHIPFDKTAELIEKLLVEMRPGILITHSPDDWHPDHRLVW  
QIVDAAWALANRRSRHGEDRIERPRMLQFSTDVLR AHKPALLVDISAF AEEKQKALSCHA  
SQSEIVKNVLA FNALWGASIGALYAEPFFTSEPLVLTSSLGLLEKL\*

>SPBIB\_v1\_290097|ID:27163622| putative Glycogen debranching enzyme [Uncultured spirochete bib]  
MSRLQDIGNGWLAGDAPFLLPFSGSRLQGFFNHRGSLDIALWGAGKIGSLYVRAAERAVG  
RRSFVEYRVSPNVLELKSETRTVRLSAMVDEPVIVVYQESRGDPSNQNTFVPAKNYLWQ  
TESGKQIHTSFIFGESARLSAIHEELFCYENSVHDSQGKKLRVSFFVIGSAQETKRALE  
KLKSHIHPSEANAFVARSIPTEQYMSKLTQHGLSEHSCTTQAIHCFHAAFSCVKSDDSG  
NFAGIAAGIGYSIPARSYFRDSYWTCLALLPFTPDIVRQQILFLEKGVYENGEAPSGLIF  
PTDAGMRYWEERKKADPALARDHVRPLDWWSDHFDSPLFFVNLVFDYIDFTADWSILDEG  
TGQTILEKIRTIFSGYKALEDADGVVPKPFHDRDWADNVFRQGA VTYDVALYYGALAKAS  
RLDGAF AARAQALRRAAAKRLWLDDKGYFAEFVQSDGYAETHLAIETITAIHFGLATEEQ  
SRKILKAVKQLLFTRNNAQPFGDWGVMSVFPGY SARTKRRGKSLFPYRYHNGADWPYWD  
GLLAWILAERNPDYQYALTRWWEYGLEQGWPEPVEYFSPFPGRGSPLQAWSSLSLRAIY  
EAKKKLL\*

>SPBIB\_v1\_290098|ID:27163623| putative Signal transduction histidine kinase [Uncultured spirochete bib]  
MSKFHRSFSFRYRLTLWYIAVFSISLLAYQTFSYFELKANLISQMDAGLLSAMDQTIQNL  
DVENGNLALQNVEKTPIKPLSETQTALRIRILDADGNVIYSASGFPAIPIHQ SALHALGD  
HSKPIYQTIQLGTEHYRVVTA VLIAGTQTKNFLQIANSLSNIDKELSSFIVRFLVGLPF  
ILLIAAAGGLFLANTALKPIVEMKNLAEHVREDRLSDRLHYQGSPDEFGLAATFDSMLD  
RLEASFAREKRFSADAAHELKTPLTALKGKLEVALSRPRTAKEYEEALTNMKG DVERLIS  
LSADLLLLSRMG NVALSSRAEKIDVGELLDSCVDQIITAFDPKHVTVKRNYEH HVEIEGV  
RDYLVRLFLNILDNAVKFSNTEVMLSISIKVQARKAAVIEISDNHGHGIPKSEIPFLFQP  
FYRVESDRSRLHGGAGLGLAIAHEIAEAHGGQIEISSAVGEGTRATVALPLSLKQ\*

>SPBIB\_v1\_290099|ID:27163624|cusR| Transcriptional regulatory protein CusR [Uncultured spirochete bib]  
MRILVVEDEKSIVDFLSQGLKESGYAVDIANDGQTGLDYALATQYDVILLDVMLPKLNGF  
AVVRELRRASIKTPVIMLTARSTVDDR VHGLDAGADDYLVKPF AFAELLARIRALLRRPS  
ISTDTAISFGDIELDTIKHEFRRRGERIELSGREFSILEYFMRNPGQVLTRTQIAEHIWN  
FDA YAGSNVVDVYIGYLRKKIDEDPSHSYIKTIRGVGYRFSPEG\*

>SPBIB\_v1\_290100|ID:27163625| exported protein of unknown function [Uncultured spirochete bib]  
MKKAKIAILALMVGLIGLLGVSAQSASATPPVTAPAAATSTAPAAPAGTAQADQEGQHEF  
EGEENDGAESQEEASVENDEKDEKNKETEVAESESQSAADTDNIEVQE\*

>SPBIB\_v1\_290101|ID:27163626| protein of unknown function [Uncultured spirochete bib]  
MLLFAGLIVSFIPAQEASPAPAAKHDSLQALGFNITIEDLVRLDLQRSLFLDPAAKVNT  
DWQDKFDELVVREIPATANRYAYAVDSQGLQYVVIRGTHNLRNAILDLEYWKDRSPILG  
INLHHGFEKAALAVFNDLEPRLKPKMPIVVAGHSLGAAEAIIVGMLLTKNGYTVEKILAS  
GPPKVTDDDEGWQFESLPVIRVVSAYDPVPFLPPKSFYPESPYTQAGMLLMLLDGPYVTI  
AEPTYFDNMPAAFKGVQKLD AHFDVIDHRIWIYADRAREKLA ALEYVPFAGWEQYAKPRG  
DAKDAPKK\*

>SPBIB\_v1\_290102|ID:27163627|icd| isocitrate dehydrogenase, specific for NADP+; e14 prophage [Uncultured spirochete bib]

MKAFSKLTAPTEGSAIEIDKGGSLKVPDNPIIPFIEGDGIGKDISPVMRAVVDAAVQKAY  
GGKRKIHWF EYAGEKALS VYGENEWLPTETLAAIREYKVAIKGPLATPVS GGIR SINV A  
LRRELDLYACVRPVRYPFGVPSMKHPERLNVVIFRENTEDVYAGIEWPAGSPEARAIIE  
TINATPHEGRKIEDIAATAIGIKPISETGSKRLIRAIRYALAMGLPSVTLVHKGNIQKY  
TEGAFRTWGYELAQKEFSEQTIQGTEAAPAPGKVAIKDVIDTAMFQELLRPEEYSVIAT  
TNLNGDYLSDACAAQVGGLGMAPGANIGDNAAVFEATHGTAPKLAGQNKANPGSIILSAA  
LMLEHLGWKEAADMIQKGMVGAIAKKRVTYDLASQMEEATMLSCSEFGKEIIANME\*

>SPBIB\_v1\_290103|ID:27163628| Aconitate hydratase [Uncultured spirochete bib]

MAGMNLVQKLIKSHAVNVSLADAERGASLSSGKEVLKIDQTLTQD TTGT MAYLQFEALG  
IDHIKTERSVS YVDHNTLQVSFENADDHNYLQDVSAKYGIIFSRPGNGICHQVHLERFGV  
PGKTLGSDSHTPTAGALGMLAIGAGGLDVALAMAGFPFSFPYPKIVRVNLKGRLGPMVS  
AKDIVLEILRRLTVKGGVGKIFEYSGEGVKT LTIPQRATIANMGAEMGATTSVFPSDEQT  
KRFLEAQGRGQDFIPLSADPDAA YDEEIEIDLSVLEPLIALPHMPDKVVPVRSVAGTPVD  
QCFIGSCTNSSYIDLAMSAKILKGRHVAEKTSLVIAPGSRQTL LMISRAGILTDLIEAGA  
RILESACGPCIGIGQAPRTGGISLRTSNRNFEGRSGTKDAFVYLVSAETA AASAIMGVIT  
DPRDLGNI EPPVPERFAVDDAMIIFPKPEGRSQSIRRGPNILPLPEFKPIPNTIEGEVL  
LVMGDNITTDHILPAGSKIMSLRSNLPAISEYCFSAIDPSFPKRARAASGGILVAGENYG  
QGSREHAALSPRYLGVGTVIAKSYARIHRQNLVNAGIVPLIFETPQDAEKIRQGNRLAI  
LNLFEGLQSNRIEVQNLTTGAVFMTKHGLSERQIEILRAGGALNAARCEFEKHKYAKSET  
SDCNSD\*

>SPBIB\_v1\_290104|ID:27163629| Citrate synthase [Uncultured spirochete bib]

MDMQYYLSKIFENNKIEEDLYARYDVKRGLRNANGTG VVVGLTRVGDVHGYIMDEGERVP  
VDGKLYYRGIDVEMLVKHAQQENRYGYEEAVYLLMFGNLPTRSELDAFTRYLGEKRALPD  
NFAEDSIMKAPSPNIMNKLARSVLACYAYDPNPEDLSPGNVLRQCLELIARFPTIVAYS  
MAKKHYDRESLFIHTPAANGSTAETLLSLIRPDQKFTRLEAEVLDLALIIHAEHGGGN  
STFAVRVITSTDTDTYS AIAAGVGLKGNKHGGANIKVMGMMENIKASVKDWSDEEEVAA  
YLARLLKGEAYDR TGLIYGQGHAVYTLSDPRATLLRSKAEELAAEKGF EKEFQLYRTIEH  
LVPTVFQQVKGSTKPICTNVDFYSGFVYQMLGIPEELFTPLFAISR VAGWCAHRMEEIVA  
GGRIIRPANKCVQPRLAYVPLAERG\*

>SPBIB\_v1\_290105|ID:27163630| protein of unknown function [Uncultured spirochete bib]

MMTNGLLDPIFPIEGAKCIAEAAERAYATTTCDGLITANNKHYKYIPNLECRRFEP EHS\*

>SPBIB\_v1\_290106|ID:27163631| putative xylanase/chitin deacetylase [Uncultured spirochete bib]

MKKNHLVKLSSLALLFAFFALTSCATAPKPSYLDPIRWWDQGGQDPIKELAIETPEQLAA  
RVPKRTDPKIVLLMYHNIVFGRTGGEYNRDLYNFEHDLVFLRNRTQIIGLDELPGIQSGK  
KKLDTDASIITFDDGDL SIYAVVFPLLKQYDIKATFFIITDFVGT TGYVSWDQLKQMSDY  
RNAKGEKLF TIGSHSLDHKRFDEIPADQIPRELSESKLAIESKIGAPVRYFALPFGAGAG  
RKEIIETAKNLGYWGIR SSTTGAMTPSTIDMFNIPAFYMTNERADILAQQIYAKLLGR\*

>SPBIB\_v1\_290107|ID:27163632| protein of unknown function [Uncultured spirochete bib]

LPPRVVPPATPAIRNIYSILFAPKVKLDYSLASYELKQSINSAADLPPYYQDSIKISYW\*

>SPBIB\_v1\_290108|ID:27163633| Extracellular solute-binding protein family 5 [Uncultured spirochete bib]

MNRKRKAIAGLLFLAALSVAVAANIPKDTLVVASNSEIFKSFDPGVCFEVEPSVYVKNIY  
ANLVTLMVDGAFTVPDLAEKWEQSSDGKTWTFYLRKGAKFANGDPVKASDVEYSYRRA

ITINKSPAWLFKDTLGLTVDSIKAVNDTTVTIVTNGAPSNIVLSVLAANIGGVLNEKEVR  
AHEVSGDMGQAWLTDHSAGAGAYVLKEWKRKTQIVLTANKNYFNGEPPKIITIVRDVPEA  
SDRYLLLKKGVDVAVWQITVEQAASLRDKSEDVALISTPAQSLEYVAMNASWGPFKDNRV  
RQAVKYAIDYDAIINKVREGFAIKNQFLAIGYFGYKESNPYKRDVEKAKKLLADAGYPN  
GFEVEIVTSEDIRRAEAVVVQSNLADIGIKSNIVVMPAAQMYDKYRNQGLQMIVAGWGI  
DYPDADALAKPFADYTVKQLAWRNAWLDDKAAAMTAAAKEINDKKRAQMYIDL VQYWQV  
NGPFAMILYQPIEYWGIRKEVKGYDKAFEGYNVHCNFTLISK\*

>SPBIB\_v1\_290109|ID:27163634|ddpB| D-ala-D-ala transporter subunit ; membrane component of ABC superfamily  
[Uncultured spirochete bib]

MELSSFILKRLILMVVVIFGVLIIVFVVTRIIPADPVGAILGGNAPPAAVDAMRHQLGLD  
KPIFMQLLDYLGGLRGNFGNSLVSSRSVITDILEYLPATIELAISSIIFAVLLGTTLGL  
LSAVFRNRFIDHFSRVFSILGISLPGFWLGLLILFFYYRLGWLPSGGQYDMFLSPTRVT  
GLVLLDSVITGEWNVFFNAIKHLILPTFILGYSSTASIMRASMLDVLHQNYIRTARA  
KGLPKKTVILRHARNALIPVVTIIGLEFGGLLSGAVLTETIFSWPGLGRYIVNSLLTLD  
YPAISGGTIFIALIYSVVNLVVDILYAALDPRMRA\*

>SPBIB\_v1\_290110|ID:27163635|ddpC| D-ala-D-ala transporter subunit ; membrane component of ABC superfamily  
[Uncultured spirochete bib]

MRKPSSDKKISGQSAFREFLRERKPMMLDDVRHTVYLWKKTPLALVGTVIICLFLVALFA  
PLLAPYSPIATDLSRKLEAPSAAHFPGLDQFGRDVLRSVIMGTRIEVSHIIVISVISIVI  
GLIVGIVAGYFGGIIDEILMRITDIFLAFPRVLAMAFAAALRPTLTNAIIAISLVEWTV  
YARLARAEAMKIRSQPYIEAIRAVGASNIKIMVFHVLPMSSPIIVQLTMRMGTIILTA  
SLGFLGLGAQPPLPEWGAIVSDGRSYLMNNWWITAFPGMAIAVTVLGFNLLGDGIRDILD  
PRIRR\*

>SPBIB\_v1\_290111|ID:27163636|oppD| oligopeptide transporter subunit ; ATP-binding component of ABC  
superfamily [Uncultured spirochete bib]

MEQQRGDLDISGLRVVFNTYAGQVKALNGVELWMNHGERLGVVGETGCGKSVTALSVMR  
LIEEPGEITSGALWFEGRNLAQLSENDLNSIRGKDIAMIFQEPVAALNPVMKVGAQIVEN  
IECQRASADAGQIPDKRAFSEIMRDMLGRVGLDWQRTEENLYPHELSSGGMAQRVMIAMALS  
SKPKLLIADEPTSALDVTIQAQILNLLNKL VRETQTA VLLITHAMGVAAQFCDFIAV MYA  
GNVVEYGSVQSIFRNPLHPYTKGLLNAVPKIGRTDELQSIPGIVPDLIDPPSGCRFHPRC  
PYRKPDCDTLEPTLRAAKTEPAADRHHVACFLYQNDA\*

>SPBIB\_v1\_290112|ID:27163637|dppF| dipeptide transporter ; ATP-binding component of ABC superfamily  
[Uncultured spirochete bib]

MQSSTSDDMLLQVSHLQKFFAVRKNLYSKPLYVKA VDCCSFSIQRNTVFGVVGESGSGKT  
TLGRVLLRLIEATGGSVLFDNTDILSLNTQELRLFRRRMQIISQDPYNSLHPRKVVKKLI  
GEGLOIHFQLSAQEIDTRVRDILTLVGLREEHMYRYPHEFSGGQRQRIAIARALVLKPEF  
IVLDEPTSALDVSVAIILKMLKDLKDFALTYMLITHDLAVIDYMADYVAVMYLGQIVE  
SGSKDDIFKRTAHPYTSLLIDSVPPTPSEHWSGHILNGEIPSIHSPSGCRFHPRCPQA  
KEICKTAEPEVVEVQPGHVVMCHFPLGS\*

>SPBIB\_v1\_290113|ID:27163638| protein of unknown function [Uncultured spirochete bib]  
LEARLMPSARRMMRAEHALYLARQLSADFVVSIALDIEVNPLRADPEFYRQAHPFC\*

>SPBIB\_v1\_290114|ID:27163639| putative Beta-lactamase [Uncultured spirochete bib]

MQMTETQRAAQFIEQYIPEAMHETKTPGYSVAVMKDDELVYGGGFGWRDRERFLPATADT  
LYGIGSCTKAFVATAVLLLAERGALTLEDPAAGRYIPLKLRATGGTPDGAPNIGAFDGS  
SGPITIHLLTHSSGLPSLSTSEILLQQGLGLETGVPLASAEDFYRWNGAQDEISALPG  
ERFFYSNESYRMLGHIIQTVSGMPFYQFIAENILKPLGMERSTFVRSEYERDADKMRPYW  
AKPDGTIVPAEFYPYDGLIPDFSFIVAAGGLISSVRDMMKFLSANMPGRAAKPGRAAIS  
ENVSLTGNAAPLLKPETLGRMQTKYIDRPAGYYGSNGYGYGWTITDNFLGHKMVAHGGSI  
EVSTAYAAFLPEKRMSVMLAANSSGMPHATIAEGILAALLGQDPYEAI PVFDIKKRMNLL  
AGTYETYS AVSVRIFAKGGLLYLEQKNPFIDS VVPLIPEDDYLRNFRFYTLTEGVRLPI  
EFRVGPKGIDL YIERDRYHKVG\*

>SPBIB\_v1\_290115|ID:27163640| putative Branched-chain amino acid transport system carrier protein BraB  
[Uncultured spirochete bib]

MADTKKQALSFGAVLVVSAAVFSGHFGVGDITFPAMLGRTTGASWFIAALGYGVVNSFMV

FLAYLAISRQNSSFLGLTSMVLGKGFAIAYTTIAVLIMGPVFILPRVSSATHEMAVAQFF  
PSIPIWVTLVYFALNYYFAYNRSKVIDRIGKYLAPALIVFMILVIKGFAPLSAVAST  
GSSTAFSDGIINGYNTMNALGASIFGIWIINELKRRGIEDAKSRSSSTIITIGIFAALALL  
LTSTGLTYLGASSGGLFPDAAIGVLSVKIAEGLLGYFGKIVFAVIALACITTSVGLTSA  
AGDTFEQMSGGKIKYKFTVAASSIIGFLLGLIGLSKIVGYTVPWLMLIYPALVIIIIMSL  
FTDFLKVKLATQAGVLVAILFSIGDFLAGLGIANTPFSKLNAAAMPLGKQGLAWLFPSIAA  
IVVFQIIAVIGRGKKAPDEAVKP\*

>SPBIB\_v1\_290116|ID:27163641| putative Metallo-beta-lactamase domain protein [Uncultured spirochete bib]  
MNTMDMLDNLSVRVVAEDSVMYESPFWGQHGISLYVTASKDGFVRHILIDVGSHEALLH  
NMRLMGIDPASIDAIVLTHCHYDHTQGLAEVLRAIGKTDIPVIAHPDLFRLNFIDKPYLR  
HVGITSDDAKSNLEKIGAAFFLTADPLQLMPGLATTGYIQRQTDFEEVGIPLKTTIDTQNH  
LVQDPMNDDISVIGAVKGGKIVILSGCSHAGIVNITKHAIAMSGISEVTSIIGGLHLVEA  
PMERIAKTVDALDSL VVGSYAGHCTGFNAQVELRKKFGTRFMPLQTGNYFEYP\*

>SPBIB\_v1\_290117|ID:27163642| conserved protein of unknown function [Uncultured spirochete bib]  
MLIEVQFSMYPPIREAHISPFQKAVNIIESFGLPVQVGPMSSTITYGESATIFKAFDRIIE  
EFAGSTQFVLITTISNACPVDFSQNKSSSKSSL\*

>SPBIB\_v1\_290118|ID:27163643| conserved protein of unknown function [Uncultured spirochete bib]  
LHKTRSIVSAKESIQA YIYFWRDNIGTEIDVVFEESSLKLRALIEIQSGKTFSPNSPRISKH  
GSVFGFVAGRLRAHL YKTQALVCYHANNHNDMEAGSSSPVTDPKVLFDDFANEYDSWFL  
TPAGRKVF A FELDLLNSLPALSGIHLLIEIGITGLFAIEFQKRGANVEGIEPSPKMRAI  
AEKRGLEV KYGLGEAIPYPDNSFDVVLAMTSIEFSKMPERFLQEMVRVTKPSGIVAVGVL  
NLWSLYGISRRVKGLFKKSLYDEAHFYSYRELKKFLSTYVNNVEVKSTVFLSPSPNFIL  
ERADAIEHFGRHHLVPFGALLVGTGKKAQRK\*

>SPBIB\_v1\_290119|ID:27163644| NAD-dependent protein deacetylase (modular protein) [Uncultured spirochete bib]  
VLILD DTVAGEPPKL V KRVRLPSVALDEWPANSGPFCYTDNMTS QSQISRDCDSASPENL  
QALYDMLLASRHCVAFTGAGVSTLSGIRDFRGKNGLYKTPDADKIFDIDIFRQDPSFYK  
MTKDFIYGLGDKKPSVVKVLAELEKRGILKAITQNIDLLHQKAGSRRVIEIHGSPSLH  
HCPRC A WSMTFSEVA AIVRAGDIPRCKCDAVLKPDITFFGESLP AEALAE AIEEARSAD  
LLLVLGSTLLVYPAATLPEYTL EHGGR LVIVNDMATHLDA AASLRFS DLGSVDFDFLEKKL  
KC\*

>SPBIB\_v1\_290120|ID:27163645| protein of unknown function [Uncultured spirochete bib]  
MSNEEAMRALMSIEGFRSLNQDIETIINKSEAVKCLKREANDRQLAKEEKLKLESEEKEY  
KSKRRQIQEKLIK FATRIPAFMYLTDYRERTLKDVITQLEPGLFKKVTGLTVKDFELLIS  
LGVFNSALMND AVYKFKRYEDASLR YVGIDRHEGEDIGLYDTILRKEEYDQTFMNIAAER  
\*

>SPBIB\_v1\_290121|ID:27163646| conserved protein of unknown function [Uncultured spirochete bib]  
MPMSRGT VFTDHSNLYLSGTPFRAIASGEFNEFDLNEFFRAEGIGKDARFKYENEVQKWL  
DLIRGSFLETTVDNLKMGARKPPFPYSDARLLNVLTHTLWFLPSVASCYAMRNLM AQRQN  
KFYHDYTVVVAAGNAAGIGVA ALEPVLKAMDDPLKTKTITLSCGKLTGVTVRPWTGIFM  
LRNSSSPETYFQA AFRVQSPWTLKNPDGQSPNEELILKEECYVDFDFAPDRALRQIADYAC  
RLDVNEANPEKKVEEFISFLPVLAYDGSSMKRIDAAGILDMSMSGTTATLLARR\*

>SPBIB\_v1\_290122|ID:27163647| protein of unknown function [Uncultured spirochete bib]  
LSWSHYAEILKADNDLEISFYTRQCEKEHWSVRELKRQMKSMMLHRLHSVKTNLVC\*

>SPBIB\_v1\_290123|ID:27163648| protein of unknown function [Uncultured spirochete bib]  
MQKQAKSKQRVANHGEVLTGEREVNAML DLVKPETEQIDSRFLEPACGTGNFLAEILK RK  
LRVVEDRYAKSQIEYERKEITVGTEMIDKLWNSSRKA VPKPSRGLTCWIGFPRT\*

>SPBIB\_v1\_290124|ID:27163649| GCN5-related N-acetyltransferase [Uncultured spirochete bib]  
MKIKIANL TEESLQDAPEWDGYPFCKYCLYWEFFGESTGPIEQSKDKAIRMKTAWLQRT  
NEHFGNCGKIA YVDGVAEGYAHYAPPGFFPRVAEYQAGPPSQEAVLISCLFIPRHRFRKL  
GLGSQLLDNVLAELKQRGIGAVETFARKGKADNPSGPAEFYFRNGFRIYRDDAEYPLLRL  
VL\*

>SPBIB\_v1\_290125|ID:27163650| Helix-turn-helix domain protein [Uncultured spirochete bib]  
MPSSFGQRLKAARIMAGLSMDALVAKMGRVSKQAISKYENNLMSPDSETLIALSEALEV  
KPDYFFSKYEIAVDSINFRKKAALGKKAMETLKARIKDTIERYAELESFFPASLPFTNPL

SDYVISSLDDIRKAAMELRKAWGFGLEEPISYIINCLEEHSIRVLEINGSDFSDFGLSGWV  
KQSPFIILNSNAPSDRKRLTALHEFAHLSLKFSDSLNSEREKLCBSFGGAFLLPRGVLV  
KELGLKRTEISFFELDRLKKQYGISMQAIMYRAKQEEIISEYVYESFSREISARNWRKQE  
PNRYPIDEHPLRFEQLLHRAISEEMISISKAAYLANTSIEDIRCQELLKNDTAHP\*  
>SPBIB\_v1\_290126|ID:27163651|adh| Alcohol dehydrogenase GroES-like protein [Uncultured spirochete bib]  
MKA AVFAEFGAPLTISEVDPDPKAPDGGVVLAVDATGICRSDWHGWQGHDPDIKLPHVPGH  
ELAGTIVEVGKSVQNWKIGDRVTMPFVAGCGHCTPCLTGNQQVCDNQFQPGFTHWGSFAE  
FVAIRYADMNLVRLPDAIDSATAASLGCRFATAFRALEAQAKVRAGEWVAIHGCGGVGLS  
AIMIAAAMGARIAIDIQSDKLAMARELGAEVVINSREVPDVLSAIRDVTGGGAHVSM DA  
LGSRQTCFNSIACLA KRGHVQVGLMLADQSHPEIPMDLVVARELEIYGSHGIQAHRYSV  
LLGMIAAGKLHPERLITARLSLAQGV EFLHKMDQFPGTGINVITSF\*  
>SPBIB\_v1\_290127|ID:27163652|ymdB| conserved hypothetical protein [Uncultured spirochete bib]  
MKTLYRSPDGR CIVAVGDITTECD AIVNAANSSLLGGGGVDGAIHSAGGPQILEECRTL  
RAGPLKEGLPPGRAVATTAGRLPAKRVIHTVGPIWRGGEHHEDETLESCYRESLAVAARE  
GLACVAFPAISTGIYGF PKVRAARIAWKT VQEFLAGSPASMPRVIWVFFSEADAALFMN  
ENKLTENKSIV\*  
>SPBIB\_v1\_290128|ID:27163653| Response regulator receiver protein [Uncultured spirochete bib]  
MGKLDK KVRTFSALEIAKLCGVVNQTAINWIRAGHLKAFTTPGGQYRVYAEDLVTFLKER  
DMRIPEELHEDLTMPVDLGLALIVDDD KDLNTILKRLLEKIEELRVAQAFDGF EAGR II  
AERHPAIVLLDLNLP GVDGFS LCKKIRSDESFGQPAVIAMTGIAQEEAQP KMMEAGADAF  
FAKPLNFDALIAKIRELLEARKNQ QGKIEE\*  
>SPBIB\_v1\_290129|ID:27163654| conserved protein of unknown function [Uncultured spirochete bib]  
MEATTVLDSSSIEAL TIDESGIAQRIAQELAIRLSQVMAVLSLSAEGCTIPFISRYRKER  
TGNLDEVQVRDCIQKFQSYKNLEERRLEVLKGINALGKLDAFLYENIQKAKTLAELEDLW  
APFKKKKTRGMLAQEKGLGPLAELMAKAPLEEVLAAPS FVRLDDEHP ELSVPSAEAR  
AGARDILAERLSQDAEIRAYVKHVVMQNGVLSVKGIGEEKREQSTYQMYWDYKEPLSTL  
KHRVLA VNRGEREGELDVSIEIDDVLVEELVLERVRPANAQHKEALADGLARLLLPAVR  
REIRSDLTESAEMHAIDVFSTNLRNLLMQPPLRGTRVLGIDPGIRTGTKCAALDET GKFL  
DYFVINQETKPDQGGKDVAAA VTKHKLSVIAVGNGTGSHEVQKLVAEIAENHLDCRFAV  
VDEDGASVYSASDLAREEFPELDLTIRGAISIGRRLQDPLAELVKIDPKSIGVGLYQH DV  
NQQLADRLDEVVSSVVNQVGNLNTASYSLLKYVSGINGSLAKKIVKFRDASGVIRNRS  
LLKEIPGLGEKTFEQCAGFLKIPEGDNPLDNTWVHPENYALAAEILPIVKSGRDP SREER  
AALKEYGVGDITLDDIITELKKNRDPREDLPPPLLQGVLSFEYLQPGMKVKGKVKNV  
VDFGAFVDIGIKESALIHVSEMGRDFVKNPMEVLRVGD LKEFTIISIDPVRRRIGLSLRS  
DAKVQAGGVQANA EKPKVVTD SRTNLAGSATTSEGRRADKRHAPREPEGDGMTYNPFADL  
LKKR\*  
>SPBIB\_v1\_290130|ID:27163655| Prevent-host-death family protein [Uncultured spirochete bib]  
MKNLSV GELKNQFSEVLEKI QKGESFGILYGRKKKPIAMIVPYAEKTKKSKRQIGLLEGK  
VDIRFADDFKMTEEELLGQQ\*  
>SPBIB\_v1\_290131|ID:27163656| PilT protein domain protein [Uncultured spirochete bib]  
MNYLLDTHVFLWALTKTEELSRKAKEAIENPGNEIYISAISFWEISIKTRLK KLDLGPLR  
PDDLQYAEKMEFQAISLTP EAMTY YKLNENSHSDPFDRMLVWQAISRNMALISKDNEF  
AKFIPYGLTLVW\*  
>SPBIB\_v1\_290132|ID:27163657| putative Acetyltransferase, GNAT family [Uncultured spirochete bib]  
METHHVPGARQENRAGSP SLSGRALMIRSATLEDSPALASLAGQLGYPASPEKVRERLPR  
YIGAPEARVIVAEHEGQVIGWTSIEVVDHFYLDKFAEISGFVVDERFRGQGVGHALMQEA  
ERWTA AHGLSTLRLKTNVVREDAHRFYENLGFERTKTQYTYVKKLARLAADL\*  
>SPBIB\_v1\_290133|ID:27163658| conserved protein of unknown function [Uncultured spirochete bib]  
MAINFERLAGNTFVAR GPTNIGLYICRREGVPGESVLAEGVPIEAQSGKAASQA HGG SRA  
FLIDSGGDADAGRRILRE CERLGVHLAGIINTHSNADHCGGNAFLQARIGCAVCATEAEA  
AFLGYPLLETSFLAGGYPQKALKNKFLMAPVSRATHILNPPCALSLDAEGQIQMRTLFGK  
QVQVRALPEGVVS GEPAPRAEPESQSDPQSECRIVSLPGHYFGMVGVMTPDRVFFAADAL  
AGKPILEKYHIFFFYDLAAELET LAMLETIEADWFVPSHAEPTQDIRPLVELNRRKINEI  
ADVIVGLCAGGQDVRESGGHSLEDIFAGVCAHYGISLDDNQHVLVGSTIRSYLSWLSNQG

RLEYSFINGRMIFKVKQ\*

>SPBIB\_v1\_290134|ID:27163659| exported protein of unknown function [Uncultured spirochete bib]  
MSKKKANQARGCTRNFNKRVAAGFGRTAMLVALLFLIAGGSGTAFQAQGH LAVDLGHPVYS  
VIETAELRGV VTRLSSVKPYTSQQVAELLAQMLGHMEAFSPSEQALIQHYAKEFKAGKGV  
EQALWQDAAGTARAGIRVEATTRFGV GELVDLMDGSGATALKDLWHINSRWV PYLAGEPL  
PWLSMKGEAGFTFDKIEKNLYLPYEFTKEWDAGHIWLGTPRYS DGTLDYPTASYDIREDI  
AAETDSGSLMVRLSRFRDWDGIGSGSFSLSGTARPFVGFETVFRPSKFFAISGLV GSLTN  
WEKGENEKSTITSLIADTNGDGLINLNDTPVFSALS YQKMLGLQRMELFPFDWLTISATS  
TLVGAKRFELGYFSPLLFSVMYQNQLADVDNLGVQVDGQILVPRIGKFYASFYADEMEIT  
NLSELFTKVRNMFALQGGVKVPIPGLSFATVTAQYTKIEPFVYSHYATWY PDPYRLRV DTS  
YTQDGENLGYLPPNSDEFLVNLEAMPAGWRVGLKYRFVRHGDNPQADWDNHLPEIFGD  
VNKYMDYNQLYSYNKNFLHDGIYDYNHIGTINVS WKPIQPPKLLGASIPFELGAGYGLSY  
TWWEDGTGAGRPVSAPQWKNVLTMSVKLFL\*

>SPBIB\_v1\_290135|ID:27163660| conserved exported protein of unknown function [Uncultured spirochete bib]  
MRRIGIFAVLLVAASGFTFAQSSSLTRVGCILGVGGLGDLSFN DLVYAGLQKAQKELGI  
QFDYVEPQSISDFETYLRKMASKAYSVIISVGYDQVDPLTKVAPQFP GQKFAIIDESLN  
LPNVVSYVSKEEESFLVGALAGFLKKANTAKNPTIGFIAALDIPLLDK FYAGYEAGARY  
VNPSVKVIANYIGGNAPFS DITTAKEIALKQFNQGANIIYHAAGG SGLGVFQAAKEKNFY  
AIGVNSNQNPIDPNHIIASMLKRVDTAAYKIAAAAKQGNLETGKT VILGLADGGIDYTVE  
GSKVTIDPKILKAVNDIKQSIVDGKLI VPDTHAKVEAFLKANTYK\*

>SPBIB\_v1\_290136|ID:27163661|yufO| Uncharacterized ABC transporter ATP-binding protein YufO [Uncultured spirochete bib]

MPAILMKQISKAFDKL KALDHVDFEVDAGEVHCLLGENGAGKSTLMN ILYGLYHADAGEI  
YIHGKAVHIANPKIAQQYHIGMVHQHFMLIESMTVLQNIILGNEAGR FTIDYAKNRSRID  
ELEKLYHFDFDLDTPI SALS VGEKQRVEIFKALYRGADIVILDEPTAVL TPQEVDVLFRI  
LDDMRKQGKTIIFITHKLHETMVLSDRVTVLRNGKIIIGSLRTEE VTPKILATMMVGYAID  
FDIVKSTFKPGKPVLELRQLKVLAASHATISLQVRQGEIYGIAGVDGNGQQELEGILAGT  
AKPLSGRIIFNGEDITAMPAAKRKAKGIALIPSDRLQNAILPGMPIIDNYLLGFQHNSMF  
SHFGILRFNVLKKHADNMVNQYSIKISALEQPISQLSGGNQKIVFSREAGLNPLLLVAV  
QPVRGLDIGAIDAIHRQLLQLRDRGKAILLISTELSEIMEMSDTIGVLYKGELIAQRKAG  
EVTIEQLGLFMAGERPE\*

>SPBIB\_v1\_290137|ID:27163662| conserved membrane protein of unknown function [Uncultured spirochete bib]  
MTRNRKYLEDVGFSLVA ILLSFLLVAVIMLILGYNPIEAYKALFEGAFGSSYSLSLTL SK  
SVPLIFVGLAVGFALQ GGLFNIGGEGQIYIGGFVAAITGLLLSHTIPAFITLPVAVLSGM  
AGGFLWGGTIGLIKAKLNINEVIVAIMMNYIAQLMTSYFVNGPFIAAKS MTPQTEILPLN  
LQLPKIIPNTQLTTS LYALIMCVLYGFVMKRTVFGFEVKAMGNLHSAATGGIYVARNT  
VLIMALSGALAA MAGIFEVFGTYGRFIDGFSSGIGFTGIAIAFIGQSTPIG IILASLLFG  
SLQAGAMQMSMMAGISANINNVIQGLVIVFIATPNIIRFAFGKRRS\*

>SPBIB\_v1\_290138|ID:27163663| conserved membrane protein of unknown function [Uncultured spirochete bib]  
MATMMFVVNMLTMTFRLAVPIALASIGVSI SERAGIINLGI EGIMLLGALGGAVGSYVFS  
NAWMGILLALITGIAIGVLYAFFVLKFEANQSVIGIGLNIIASGLTVVIVKFIWKKEGIS  
GIVTQMSTYSVPFLRNIPVIGAFFTDQSPFILLTLIALACSYGMWRTKIGLRLQAIGEN  
PLAAATAGIPVARYRTGAI VVGSSLAALGGAYLSIVHSNLFVSNMVAGRGFIAIAANILG  
GWNPMGSLLASLLFAFAQALRFQFSAVHFDPQISQIIPYVITLLVLVGVGRKTRAPAKLG  
VLE\*

>SPBIB\_v1\_290139|ID:27163664| Amidohydrolase family protein [Uncultured spirochete bib]  
MSRIFLRHGI VLTIDDCDA YYPDGCIVIEHEKLIFVGEDAQH PGIHPEDSVLDMRGKLIM  
PGLINTHVHSHSPLFRNFGEDVPLQVWLNDIMWPAESHMTEEHAYYAALHTCLEFISSGV  
TTFADQFYFADAVARAVEKSGLRAFLCSSIFENGKSERGQTVQTAADFIAAWKGRNPLIT  
PGLGPHAPYSVSAEQWRSIVALSQATHTLIHTHISETKTENRKSFAEKGESPTKWLES LG  
VFSCPTLAAHCIYLSDEDIAVFRNHNHVHSYNPVS NLKLVSGIMPYLKKTAGVQISLGT  
DGAQSNNTLDLLQDLKLA VLIQKQKENDPAFFSVFDAVRLVTIEGAKALGLDSVIGTLEA  
GKQADLIALDIQQPHLQPLHTDSIQMLY TMLVYCASGKDVT DAMVQGTWLMKDREILTLD  
VHSV LHNTADISEQLRKKAGLTGD\*

>SPBIB\_v1\_290140|ID:27163665| Phosphorylase [Uncultured spirochete bib]  
MALDKNAITKNTKQYHIELNVGDIGEYVLLPGDPARSDRVAKYLDDAKLMANHREHRTFT  
GYKGIKVSVTSTGMGCPSTAIAAEELIHIGARHLIRIGSSAALRPDIKIGDLLITTAAM  
KNEGTSKFYVPENFPAVPDFEFTHLLIDVAKEMTSGSDKRVFAGISSTDDAFYGETPEFI  
KKLQDLKIQNIEMEASALFTIGHLRDVTACICGASGNLTTGEVIYTTENYKLAEAWDLE  
IRVVLEAIYRNEQRKKS DVRM\*

>SPBIB\_v1\_290141|ID:27163666| putative Regulatory protein GntR, HTH [Uncultured spirochete bib]  
MNNEESLKFRETKKPL YVEIYEKLFQFIEERNFHEGDRLPGENSLASELGVSRTTLRQAL  
VLMTEDGVIHRIHGKGNFIANLAPRNLAGLENIANPVKAFTTVPVDEINIDMRFEAASEY  
VMKLFGEYKSKVVMASDRWYRSGPRLIACCFASFSDLDVISSHNIDIQDAEIVKAFLEKQV  
YELSSVSLNHINITNRKEFSNINIKMDSNTLILLSETLYSSENKILTHNKYYLDPLYFDI  
VANGRHINRI\*

>SPBIB\_v1\_290142|ID:27163667| putative Acyltransferase [Uncultured spirochete bib]  
MRYRKGAPLTNDTPFSRLIWDILIALIALVGVWPISRAFYRIKIGRGCDATSSAGMDEGSP  
SRLNTPNATRTSPIASVPPKLPSPAILVSNHCOMPLDPLFHGLAIFPRRTFFTLLEETCEA  
PVLGSFVRLGGIPLPRNRARLNDIEQAVAHALSTRGLIHFYPEGECFLGNQNIYPFKAG  
AFYFAIKFGAPVPIVTVLKKRAGHSTFRGQKSSRIQVTVHVLNPIQPPACGATAHETLA  
RAIRFSNQVQDLMQAEIERCGGDKSLYRGMPRIKGVND\*

>SPBIB\_v1\_290143|ID:27163668| putative Glycosyltransferase, family 2 [Uncultured spirochete bib]  
MSIALLTAYGIIVFAACIFFFFVTVSNIFFWL VHTQSIPEKESGPSVAVLVPARNEALRIR  
PCLDSLLKQNYRSYQIYVIDDNDSTDETWEILKSYMQRYPKFKAFRAEPLPEGWYGKPHA  
LQELSGHVEEYMLCTDADTVHKPDSIGRAIAVAERYKADLVTGYVHHVMPTFAEASVEP  
SIYILTMLAMPLYLIPLVKSSKISHAIGQFMLFRRSFFEKIGGYEPVRKQATEDVKMANI  
VKQGGRIAFVDLRMSVECRMVNDYRGAIQGIKNAIDYLGKNTLFLFLGTVAVPLVFFV  
PIIWFNIPWLGPAVPFLKASAILTLYTWILEAIDRRLPAYVPFIYPLIFVNALSALWS  
GYRQVRKEGGVEWKGRKVI\*

>SPBIB\_v1\_290144|ID:27163669| exported protein of unknown function [Uncultured spirochete bib]  
MRVLHSRRQKVGQLASAMAFVLLLLNGYYTGAQQAPAQSAFLAPPQNPSVGNFQFPFAG  
ALSPKQELLPGVAFPQELSADAVKAFLGLRDDVYNNVPETIDAMAASLLKIVAGAPLSP  
ADRSLMNARIAYLAGRSWNDHKNKKQAVPWFEQAVSAARSVIDISGETPTSLIVLAEPLG  
ELSILKDLGFLLANGPKIGQYASKALESDPHNKALLLKASALAYPPPIWGGNYKKALEA  
YAAILPITEPGLPRDVLFDLVRGIATAYANLKLSEHAAWWFRAALELYPENNYAKSELEK  
LSQ\*

>SPBIB\_v1\_290145|ID:27163670| conserved protein of unknown function [Uncultured spirochete bib]  
MCDTVILMDNSGKPAFFGKNSDRHPEEPQALLYISERAPSTVMLREGVEYQDKGFALLS  
KPSWMAGGEMGVNSQGLSIGNEAVFSRFPDEHGILGMDILRAALSACASAKEALDFITS  
FIEKYGQGGNGAYK GKLIYNSFLAADPQEA YIIETAGKRWAWRSAMVADAISNAYCIED  
DYKRLDMQTRKEIAPV NKRAACSDSDPGRKGRNSWKAHVEDRKYLFFTKGEQRRSSSL  
GGLMRIA AERASSAQTEAQNEAQSEPKAQLEKIFSLRSHEGATKPGPFLSRMKNLCVHP  
GLFPQSATTASMVVEYLPGGALVWHTDSSYPCISLYKPVLLKDGRFYSLWKPLCAENKAE  
ERYASWNSHRQWAVKSGHLQLSAKEDFALS RDAAQASIIRIAQQAFDSVSREKGS PERIS  
SVYANEVA AIVGEWEKRWGN\*

>SPBIB\_v1\_290146|ID:27163671| exported protein of unknown function [Uncultured spirochete bib]  
MDRTRPSSLVILLFILSII LAVATVAVTRII EHSRPDVCAQFTIYLEKLQPQSM LVAATT  
QERYSASKEFTAKLLAIFKIKAKIRLSALADV TYVISAADPSAWSARWNP KKRI LSISTP  
PPDCLLP AVHTDTIEIV SENANLLTNTIFRLKEEA ARMQSELSNDLMVHAKASLDEPQVL  
QSIEDGVRRFALVFCESAHIGKPA AIDIQLAPRLTER\*

>SPBIB\_v1\_290147|ID:27163672| ggt| Gamma-glutamyltranspeptidase [Uncultured spirochete bib]  
MEAHMKKLAFV FALFVAALSALSAQLPVNLYGRAASGPNVVA AAKPEASQV GIDILKKG  
GNAVDA AVATGFALGVLEPNASGVGGGGFMIKMKDMTEPVVIDFREMAPSKSTPTMYLG  
ADGKVPNSTIEGGLAVGV PGEVKGLLYALEHYGSGKLSRADI IQPAIQWALTGVPVTVN  
LASIIKDNYGKLVKYENGAQIYLDGLPYE VGDVIYNPDLAKTLAKIVKEGTDAVYKGEI  
AEAIVKEVQKRGGILTLEDLANYE VKIRK PVEGSYRGYKVYSVPPASSGGTHLIEILNIL  
ENFDVKKLGFQTAQSAHLWSEILKLT FADR SKY MADTEFVKVPLAGLTSKEYAKEQAARI

DLNKPLAPVTAGDPWKYESGSTTHFSVMDKEGNMVAVTKTINYFFGSGV TIPGWGFIMND  
EMDDFVATPGSVNSVEPGKRPLSSMSPTLVLDPQGRSFMTIGSPGATRIFPTVAQVISNV  
IDFGFPIQEAILAPRVWQGASGALNIEGRYPASALDGIKKLGHDVTIRGDWDAYFGGVHA  
VVYDYDKGVLYGGADPRRDGQAAAF\*

>SPBIB\_v1\_290148|ID:27163673| conserved exported protein of unknown function [Uncultured spirochete bib]  
MIGRQRKLPASLQRAFSRLPHGAGCFSRKGFMSMKRSRVSLLVAAVIAVLAPLSLAAAYNL  
KAPFASQPALLTSIGQSADVEMAKAIINRLKISFTMDSL VKAQGLASSNAKTLIIVIGGS  
SKGLGAAGISADAELERTKALLAEAKKRGMKIIGLHIGGEARRGELSDRFINAALPSCDY  
FIVVEDGNNDGLFTKLCGTKIPLDVVQKISQVGEPLAAAFK\*

>SPBIB\_v1\_290149|ID:27163674| conserved membrane protein of unknown function [Uncultured spirochete bib]  
VSQEFLLFILMVG VFAAGCFALKWPVSVSMLLAAVAGALAGGVQNPRIHLVEGTFGYVDT  
ILTIATAMMFM TGF RDSGALEAL TAAVIRKFNKLPGLLMILLTFVIMVPGMITGSSTASV  
LTAGAVVAPMFASMGMSALDSGALISIAAILGMIAPPVNIPAMIIGGGIDMPYVGF EIP L  
ILLTFPLAIAFALWFGWRNVKVRDRSKVVESLDFSALNQYGAWRLFSPLILIFVLMILDK  
TVPRVFGLGMPLIFLLGTALTWMTGKRFEILKSAKKAIEDVLPV LGILVGVGMFIQIMTA  
TGVRGFIVNALSVPALLYVMIAVSIPLFGAISAFGSSSVLGVPFMLALLGKDQIIAAA  
SLSLIAALGDFMPPTALAAIFA AKVVGLEKYGGVLKKLVPGLIIAVYGILFIVFSKQIR  
ALY\*

>SPBIB\_v1\_290150|ID:27163675| conserved protein of unknown function [Uncultured spirochete bib]  
MFYIYLAILAVVLALTVWVLFDTKKLSLQVTAAMVIVPLLLRLLMIK\*

>SPBIB\_v1\_290151|ID:27163676| Succinylglutamate desuccinylase/aspartoacylase family protein [Uncultured spirochete bib]

MQKHTISAIICLAGALVAAA IAGASFLAMRKPDLIVRGPVTDVKMLSDWFPGLKGT PGD  
TEVYILKGADDGASMLVLGGTHPNEPAGHIAAIMLIENAQPKSGTLYVIPRANASGFTAN  
DPQEGAPQSFTIQT PNGPRVFRYGS RATNPIHQWPDPNVYIHASSGQTLSGSETRNLNRG  
YPRPDGTLTERVCY GIVQLIKKENVTITVDLHEASPEYPVINAIV AHPKAMQLASDMVL  
GLEMQDIKISLEPSPVNL RGLTHRELGDFTDLPVLMETANASQGR LRGR TDEALVLTGK  
DKWYVRAEKLGRLYVPYDENGHPLEERVGRHVAAISELMNSWNLEHPEKPLEVEGLPGYE  
DFLTKGIGAFLLPVP AKN\*

>SPBIB\_v1\_290152|ID:27163677| Plasma-membrane proton-efflux P-type ATPase [Uncultured spirochete bib]

MAQGVQPSTGAFSDSTEAFKTL SLEETLAKLNASVDGLTAAEASARLARLGLNAIEEKKA  
HPLAQFLSRYWGPMPWLL EIAILLA AFLGHVTE SVIIFLLLSINAVIGFMHQ RNASKALE  
LLKKRLAVNARVLRDRNWQTIDATEL VPGDIILVKLGDIVPADVKIVRGNLSVDESSLTG  
ESLPAERSENSIVYSSSIARQGEATCLVLNTGGNTFFGKTASLVKIAKPVSHQEEVMLTI  
VRYMMYLGIVSSFAVGIYALVLHIPFLMILSFIVTFLIGAVPVALPAVLTIVQAAAGSQM  
AKKGALVTRLD AIEDAASISVVCFDKTGTITQNKLSVVGSAASPGFSEDDVVRI AALASS  
ADNMDLIDSAILNAAAARGLATKGCAQLSFTPFSPATRRTEAVIECAGSRYHVLKGAVPI  
ILELCSDTSESARSDINAHVALFAQKGYRTIAVARAPLGAATGNVQAAPESPELIGILA  
LADPIRSDSRAMIADLRALNVKPIMLTGDSLAIAREISVQAGIGPNIISIKELDGMDEGA  
QARKVAQIDGFAEIPEDKYRIVKLLQKSGYMGVMTGDGVNDAPALKQAEMGIAVSNAAD  
VAKASASVLTQEGVGVIVQAIRLSRRTYQRMLTWVINKVTKVVQVLGLLIAGFFLFRNM  
ILSMLDMSLLVFANDFVTMSLATDNAKDAQAPNQWKVKNITLASLAIGLLAAQGIGGIF  
IGQDLLGLDFGHMQTFVLLMLIFTSQFRVLIVRERRCFWDSMPGTLLLASTGSTMAIFFL  
MGAFGFIIPALGARETGLALAYSLVFTA VLDLCPKRLFFKLFHVD\*

>SPBIB\_v1\_290153|ID:27163678| NADP-dependent oxidoreductase domain protein [Uncultured spirochete bib]

MFYRRLGSAGIKVSVLSLGSWVTYGSQVDTEAATQMIKFAYDHGINFFD NAEVYAGGKSE  
TIMGQAFRKLGLRRGSYL VSTKLFWGINEGPNEKNTLNRKYLLEGIEGSLERLGMKYVDL  
LFCHRDPDPETPIEETVWAMHDIVSSGKALYWG TSEWSAEQIREAWEIADKRNL RKPQMEQ  
PQYSLLVRTKVEKEFARLYEGIGLGLTTFSPLASGLLSGKYKNGIPKDSRFALPGYEWLQ  
ERWYHDEVIATIENTLRPIAESLGCTMSQLALAWVARNPVSTVITGASRLS QLEENL GAL  
DVLPKLTS DVLQKIDKALEPILQKSS\*

>SPBIB\_v1\_290154|ID:27163679| putative DNA repair exonuclease, SbcD [Uncultured spirochete bib]

MPGARLYFNVGARRIEPFMKTYYTDVRKGRFAMDERAGIFKILHISDLHLGKSLRSRDLA  
EDQAHILSSIVRETARLAPDLVLIAGDIFDRSIPSESAQTMFGRFMADLRRALPFDGRIL



VIPGNHDSARRVAFAAELFEAVGIHLVSNVRPVPALVLEKGGKRAAVWALPFVTHGAFHE  
FRRTWLDAADEFPETGAGRMADHMASIIANLRPHFAEYDMNVLAHHCYVRGAELSESDSA  
FIGGTEAVPASLFEPFDYVALGHLHRMQALSPHMWYSGAPMAMSFSGDGGSDKNSDKGFLC  
VEIDAANGHLTVSPIALEPLRKMKRVRGFSFELTKETPEPADQDYIEVVLTDTDPVYNF  
SELAKRFPNLAGVQQEAFQKIALGGAGDNLGASAQPWLSLSRERNVHAAVLEDFRSFAKY  
ILDEEPAEELVAAFEALIAEMAEERE\*

>SPBIB\_v1\_290155|ID:27163680| protein of unknown function [Uncultured spirochete bib]  
MRPIRLAFEHFGPYAERQDIDFSALEDFFLIYGKTGSGKTTIFDAIAYALYGEAIGGRSN  
LEREFASRFSSQGSKPWVEFEFSASSAQWKVYRSVPYKKQNRKGKESAAAEEAALYRMNE  
ASKSYELVADRITPVNEALLDLLRLRADEFSKIVLLPQGEFQEFLEMKTSDRAAILEKLF  
DVSMYEKATEMARRKVDLLSSSLSAKNDELERLASELGSDPLARIAAMRKAFEGFRAQIE  
ETKENASHLDTEIAQINERIELWQAFMSARAAFIELEHSHKPSFEARAASLDAAKNLATLA  
GLAQSVRSQHEDFLAVLKEAQRAGTELSKLEKARLEVEKNKERLPGLKNRQNELQRTAAL  
YQRALDAWRRKEETARNLDELQKKISIALDSCAAREQELALTRKRIFEFEALLAKEPEAQ  
ALTQNNVAIEALKRAEGLAKQLERLNSQRAQILREIQSTEDSLLTASRDLASAEAARSR  
LEDAFRLAQAGIFAAALEEGEPCPVCGLHHPASLPNYAPDEQTVRQAQDAVETQKAR  
HAGLVQKKESLAQRLQDIEHEIGSLQQSISEEWQNREELASLRQEAEIESSKAIEALAQS  
LKERKRILDTELEQYRLTRDALRTSRQQFEAAEEAFNQARQEREQLEKTKAELQARLDSL  
AEQAGEHDPEPLENTRALSQDLQGEIIEQRAQEWQMA YRATS AQLDIHLSSELEKGN  
SLGPAFVRFEESERLDVRVLLRTLEKPGIAKDAALQTSVPQKIFVPEESPHEAPARAKP  
PSALDALS DLAGILLQTAKGNETADR KARVGR TASILSEAFRAAGQKEAEAEAEADAL  
SLVAHVQQTAWPTDRLRSEEQAVSAFREA YARAKAA YDALAARARRLNEDA AKSFS DQEI  
ESEEHALIDARDALVLRKKDLEDTLAELQRARAEIGAQLDQFKRSLERYNELQQQYSAAT  
QEFGKMEKLSRLSGDLIKGKKLPFKNYVLGAQFREIAARASERLYRMSSGRYIVEADPL  
SGTGNQKIGLELFITDAWNGARRPVGTLGGGEKFMLSISLALGLADSIQERAGANRIESL  
FIDEGFGSLDAESLSLAISVLDELRGDKTIAIISHVDELYSRIPSRIVVEKGVGGSRLRL  
ERD\*

>SPBIB\_v1\_290156|ID:27163681| Alcohol dehydrogenase [Uncultured spirochete bib]  
MHEFYSPTKIIFGEGCASETAPRLREMGATKVLIVTGKSSTASSEGFRDLCKGLDAAGIQ  
WVHFAEVSADPETSTVDKGAEVYRANDCNAIIGFGGGSPIDCAKGIAASIGEGRPIDRFV  
GTGLAFTKPVPLVAIPTTAGTGTEVTNAAVFTIVDEHGHRSKKGTSSQFYFPLRAIVDP  
LLHMSMPPSLTAATGMDALTHAIEAFVSRFHTPVSDMYCLEAVRRIGRSLRAACRVGSDS  
GTGDGAFGAGRGLKASGNSSGNRALLEARS DMALAATLAGVGLSQAGLGMVHGFAHPVG  
AMAGLAHGLANAILLPFVMEALIPDAGERLSAIGEALTGKRGTSAQDAVRDIARLGRDIG  
IPENLEAAGVPQRYFEDILADALSYRRRKASPRAFDTDEL RGLLARMYSGKVEA\*

>SPBIB\_v1\_290157|ID:27163682| putative Cl-channel voltage-gated family protein [Uncultured spirochete bib]  
MQEFFSIYPKSKLQPDYCAPIEHPDATRLYGLKNGNLYTHTRIIYAYAALTGAVSGLLV  
VAYRTAIVSAEHFRDALIGNAPPAKVLLWLGIVATGAIFTALFVRRSPLIKGSGIPQVK  
AFLMRRINFDWKRELPLKFAGGTFALGAGLSLGREGPSIQLGALAGTAIEDIFHIPDYRR  
FLVTAGAAAGISAAFNAPLAGVLFCEELHRNFSPVMLTVTMIA SFMANVVMWIFFGTSP  
IFELTILETLPLRYFTVILGIGVLAGALGSLFNIGLLGFQKLYRRVVPREEFRVIS AFL  
MAGAISIVFPMIAGGGNHLVSFPLLSTMSFFAIALLAAKFVFTLFSYASGAPGGIFLPM  
LAIGSVLGGLVYSLLGLFGYQSPYLPNYILLGMAGFFVAVVRAPITGAVLITEMAGSFAH  
FPAFIFVSIATLTANLLRTKPIYDSLLAQIPPLYPEQITHAAATLHIPFMEGSSIIHLVS  
ELKERLPGECILTGMIRGEERLFPYPSMEILPGDEALIEVDQRAARLLKEELLKLGMPTE  
DEQEIKSNGAAFT\*

>SPBIB\_v1\_290158|ID:27163683| oppA| oligopeptide transporter subunit ; periplasmic-binding component of ABC  
superfamily [Uncultured spirochete bib]  
MRKLLFAMIALLA VVGLSAQDFTIVNGAEPASLDPHAVEGVPEHRIYMALFEGLTVSDPR  
TNRAIPGIAESWSFSKDYKTITFKLRKGAVWSDGVEITADTVVKS WLRKMDPKNAFQYAD  
LPAMYIAGAMDYLEGKAGPESVKIRAVDKYTFEVQLVGPCPFFADMTTHYAF AIVPIHAI  
EKYGGQDWVKPGKIVSNGPFVLSEWKPQEKIVVVKNNKYWDAKNVALKKVTFIANDDINVG  
YNLYKTGAADWTETVPLELMDEVKLRKDFHVAPEYGTYYYIFNVTRKPLDDARVRKALAM  
AINKNDLVNKVTRGGQIPANGFVPPSAGYTPAKGYGYDPETARKLLAEAGYPDGGKGFPTL

QILYNTSASHKRIAEFIQAQWKDNLGINVGLLNQEWGTYLDTRSQSHNFDMARAGWIGDY  
LDPSTFLDMWVTGGTQNDGLYSNPKYDELMAKSRVTSGSERYQIMMDAEKVLIDQDMAVL  
PLYYYVTQNLIDLNKWDGWYPNPLNTHPWKFVVRPKK\*

>SPBIB\_v1\_290159|ID:27163684|oppB| oligopeptide transporter subunit ; membrane component of ABC superfamily  
[Uncultured spirochete bib]

MARYFIRRALSLIPTLFFIVITLSFFLIRLAPGGPFAREREVPEAILQNLMKRYHMDPEPLF  
KQYLRYMGDIVRWDFGPSYRYRDLTVNEIIDRGLPVSMGLGVISLVLAAVGGVAVGIIISA  
LKQNKWQDYVAVSIIVIGISVPLFVMGPVLQLIFGMKLIKILPIGWISTHGLKAVILPAL  
TSLFPYFAYIARLSRASILEVLRSDYIRTARAKGLKESVVVWKHVLRGALLPVVTYLGA  
FSGIVVGSIVIESVFLVPGIGRPFVQSALNRDYTLMAEVVVYSIILIANLVVDLIYGL  
LDPRISYK\*

>SPBIB\_v1\_290160|ID:27163685| ABC-type transporter, integral membrane subunit [Uncultured spirochete bib]

MANKKLQQA VNEFNQVMKPVSLWADAWKRLRKNKMALISLFIVSIYILISLFAPIILTSAG  
VLIDYRKQVITNASLPPSLKPAGELVVKKIEARIASLEQRVKEKAEEQSAFGSFFNFAT  
DQTQPESAAEATPSDQGDTSFTFTYQGEFSGNTTDPVVRELISQKETLEKVKAEALDTN  
PDYKLVYILGTDDLGRDMFARIYGGRIASIAIGIVGTLTAALVGLIGAISGYVGGWLDN  
LLMRFVDIMYGLPYMLIVIIIIMAMIGEKGARSGFVVLVFAIALVSWLTISRVRGQIISLK  
NSEFVEAARSMGASSWRIIFRHLNPTLGVIIVSTLMMPSFIMNESFSLFGLGV SAPD  
ASWGTLVSEGVRAMESYAWQLLGPGIAMTIFLFCMNFLGDGLRDALDPQSKNRT\*

>SPBIB\_v1\_290161|ID:27163686|oppD| oligopeptide transporter subunit ; ATP-binding component of ABC  
superfamily [Uncultured spirochete bib]

MTDEVILEVKDLKTYFMVDEGLVKA VDGVDVDFQLHRGETLGIVGESGSGKSVTNLSIINLI  
PVPPGKIAGGQVLFHGKDLLKMPPEIRDIRGNKISMIFQDPMTSLNPFLRISTQMVEI  
ELHQGLDKKAAKEKAIEMKLKLAGIPAPEKRIDQYPHQFSGGMRQRVMIAMALSCNPEILI  
ADEPTSALDVTIQAQILELMQELTRKLGTA VIMITHSLGVVAGMCDTICVMYAGRIVERG  
RTEEIFESPKHPYTVGLIHSVPRLDQETKGRLYSIPGQPPNVIDLPDCCPFFPRCEKAMD  
ICKKKYPPSVSFENGQSASCWLYAKEA QNA\*

>SPBIB\_v1\_290162|ID:27163687|oppF| oligopeptide transporter subunit ; ATP-binding component of ABC  
superfamily [Uncultured spirochete bib]

MPDHKVLVDVRGLKMHFPIKASFFSKAKNFIYAVDGIDFQVRKGETLGLVGESGCGKSTT  
ARAI AQLYKPTAGEVILNGKDLTKLPPQEMIEARKNMQMVFQDPYASLNPRMTAGDIIAE  
PIRIFQKRGLIDMSTEERNDRVEHLMK VGLSRFFKNRYPHEFSGGQRQRIGIARALALN  
PELILCDEPVSALDVSISQILNLFKDLQDEFGLTYLFI AHDLSVIKYISNRVAVMYLGL  
IVEIADAADLYKNPLHPYTQALLSAAPIPDPKIEAKRKRIILTGDVPSPKQRPGCNFYD  
RCSKHMDICKQARPMLKEASPGHEVSCFLYHKPE\*

>SPBIB\_v1\_290163|ID:27163688| Dihydroorotate dehydrogenase [Uncultured spirochete bib]

MVSLQVSRFGLVFPNPVIAGSSGLTGNIKSIKELARNGIGGIVLKSLEEQILMEARREA  
SKGGVIYQEEIDDIYIGYYEKKHSLSEYLALIRDAKHEVSVPIASINCVSGGEWTEFAS  
EIRSAGADALQLNIFGRNSDPGSIVRAVKDKINIPLIAKIGYYFSDVSAVVSEIERAGA  
DALVLFNRPYSIDFDIEKLSLKQGA YFSSREEMSVPLRWISMLFGKVHAPIFASTGIHNG  
DDVVKMLLAGAAGTEVVSSLYRNSPEVIAQMKARLESWMDAHGFETIEAFRGLLSQELSS  
APETYERVQYMKYYGELQERRDGAGN\*

>SPBIB\_v1\_290164|ID:27163689| Multisubunit Na<sup>+</sup>/H<sup>+</sup> antiporter, MnhE subunit [Uncultured spirochete bib]

MKHGREAVILFIGLFLVWVLITWSVQPQELLTGAALVLVLTLMRSVYPLLEGIRPGITP  
LFSMVAYIFIFIWQLILANIDVAKRVLSPSLPINPGIVKVKTKGLKSPLAKVMLTSSITLT  
PGTSLSNVQDDEIFHWIDVKGNDVESASKAIVAVFEQGLKGVVE\*

>SPBIB\_v1\_290165|ID:27163690| Putative antiporter subunit mnhF2 (fragment) [Uncultured spirochete bib]

MITISLILIGLSAVLTVFRLIKGPSLFDRLVASDTLSVIGMAFLVLAIEIVQTTSYMDVA  
LVYGIVGFLGTVTIARFFMRVSK\*

>SPBIB\_v1\_290166|ID:27163691| conserved protein of unknown function [Uncultured spirochete bib]

MTVVGEILMLIGGIFLGLSLGLVRMPDVYNRLQTGTKASTLGAMSIGLSAIFLLPGAAG  
KAVLLVVFIVIANPIASNTIGRSAYLSGIKLSEKSVSDAWGVQASGEAGMVEGAAADATI  
TGAAPEATDNKGA\*

>SPBIB\_v1\_290167|ID:27163692| conserved membrane protein of unknown function [Uncultured spirochete bib]

MVAMVIVVSVLLIGLAAGAI FMRSLSGAVILLGTVSLLVSATFLLLAAPDVAITEAAIGS  
ALTTLVYVVLVKRTNSVDSLEDGSNLQTGKRSESAHNGGSPAGGSHA\*

>SPBIB\_v1\_290168|ID:27163693| Na<sup>+</sup>/H<sup>+</sup> antiporter MnhB subunit-related protein [Uncultured spirochete bib]  
MRKVIGVLLIASFAFFIFSLVMRDLWVEDPAAVRTLQGAAIEQTIPQSGAANTVTAIVVQ  
FRGLDTLGEVTVLFLSALGVALLSGEFAGRGLKEVFRDDGGFILYNGARLVLPIIVLVGV  
YIVAHGHLSPGGGFPGGVLVATAVYAVLMTGVKNELSTRLMAVIEGFAGLAFVGLGLLGL  
LSDRFSLANVLPKGSFGMLFSAGIPLIYAAVGTKVAEELSTLVTSLTGSDYASAEKEA  
QGGKR\*

>SPBIB\_v1\_290169|ID:27163694| NADH-ubiquinone oxidoreductase chain 4L [Uncultured spirochete bib]  
MISVSAVLYSTSMILILLGLYGVLTRKNLVRVVISLDVMDLGVNIFLVTIGYIRDGRAPI  
YLSDAPLSLVDQASNMDPLPQALVLTAVIGFGVTAVALTLIMRLYERNGTVMVSDLRG  
LKW\*

>SPBIB\_v1\_290170|ID:27163695| putative NADH-quinone oxidoreductase subunit N [Uncultured spirochete bib]  
MVSPMLLIAMPLGAAFLIVLLGSKMAARIVAIATVAFLAVLAPIWLSAAISEPFVIVLAD  
VLPPLGIAFGLDAVSAGFALLIAVSGLLVLLYSFPYIPHAGEFKGKEKAEVRYAIFLLL  
LAGAFGLVMTKDIFNLFVFFEILCISSYLLVAYSQEERALEAGFKYMLVLSIGS AFMLVA  
IGLSYRLSGSLAMADIAKALAAAPNSYATLVSVLFLVLFVGFIEAAVFPLNTWLPDAHSSAP  
SSISAVLSGFVIEVALVVLVRLSLNVFSGAMLSVLAVALAGILVGEMAALGQKELKRAL  
AFSSIGQVSMMLFAFTLGSEIGKWAGLGQLMHAGAKSALFLVSGYFIVRTGSHEIEAYR  
GLGRKMPAAGAFFAIAALSLVGMPLFGFFTKLRIVEAAAAHSAIGYAGIVVILFATVI  
ESIYLFRIVRTLYGANAEVAASGAASGDLPAFAWIAVAGFVLLVLVGGFMIPSFDRLLQP  
MAAVLATI\*

>SPBIB\_v1\_290171|ID:27163696| putative NADH dehydrogenase (Quinone) [Uncultured spirochete bib]  
MLTSMLLILPLAGFLTSLAAAWVPASSKARASGAVQKIIAGIGFAALFVFAFLAKSEIG  
TGYLGIPLFGLWLNFGTLQLSWYFVAMVAGISLVTVLFSLQGLRDDGRYPFYIWLFSKT  
FGMLGVLLSADMLTFFIMWEVMSWCTYFLLQQGHEKAKRAGAGYLVYAVTAGMILLAGLL  
YVYFNVGSFDFRTIQKAFSGFGAGRIIVAMLLVLVPMLEAAAYPVHWWLPSAYANAETG  
ISAYLAAISTRIGIYGMTMFLFAGFGLTALNLVTANKYVSANEVLMIIAFTMVVPTFTA  
LFQHDAKELMTWHSIGQGGYMI VGIASSTTLGIAGGLFHVFNHMTYVSLILFSIAAVEYR  
TGTTNLNKLGLIKKQPVAYLGLLFGIIGLAGIPPMNGFVSKWLIYRALILSGHPFIALA  
AFIATLGTILSVYKLIHNMFLGQLPERYNDIKEVGMWGMRLPIIFMMAVVWLTGAFPPTVL  
AVVADIQQSLGLERVAYSVHGVAEMGQLNMLVINIVFIGGLFVSWLIYLAGGKRKHIGQ  
YDNYAAGHFLDKSIPYNYNYNFYAGMEHIFERLLHKPPVKRAEQALATFVSGTSEYVCRI  
FTGNITTSAYVVA AVVVILLVLGGGR\*

>SPBIB\_v1\_290172|ID:27163697| Respiratory-chain NADH dehydrogenase, subunit 1 [Uncultured spirochete bib]  
MSVLSIVVWIIAYPLIIFCIGVLLGGYERKFSARVERRIGPSWIQPFYDVIKLSMCKTNN  
SHGYMHDVAIIMLLGGTMLTYFVPVPGFSYFSQFGDFLVISYLLLIPSLGMALGVGETA  
NPNGSIGISRALQMLAGYEVFILTFIGVAMKEQTTSMLDIIRVQQAGGFVAWGIAHPL  
LGVAALIALQGMLEKPFVIVAPHEIATGPMTEMGGKYL GIMFIQHIAVPLELTLYIN  
LFLGGASNWLEYLVKLFVLWTALISVNMVFRFRVDSAVKFMWKISLPLAALGVIGIMLN  
IA\*

>SPBIB\_v1\_290173|ID:27163698| NADH ubiquinone oxidoreductase 20 kDa subunit [Uncultured spirochete bib]  
MAKELTQKAAWDRVLAKLKNSLWMLHYCTGCGAIELPPTMTARYDMERFGIMPMTPRQ  
ADILLITGYLSVKTLKRVILVYEQMQAPKYVVGFGSCTINGGMYWDSYSTIKSLDQYLPV  
EMYLACMPRPEAIIKGFSLIDRVGKGEANSWRDYENYEFYRKNQEELFGGPIQSYQD  
IPADAQKFGILEARQ\*

>SPBIB\_v1\_290174|ID:27163699| NADH-ubiquinone oxidoreductase chain C (modular protein) [Uncultured  
spirochete bib]  
MKRRVIDVTARLYKATSSAEHARSESEGAAQFVEDDVS NKMSLEEMRARI EKTAGFPGFV  
VLQKQKRIQGEIPADKLYGFAVTLKNTLGFELHLSAISCVDWIDEGRFELVYHFWNYEQG  
ILVQAKISIDRENPSQPTITDLWQPAKFFERDIHEMFGVDFP GNE DLSKYILSDWQGPPP  
MRKDFHTREFAHSQYHFKDYEPEWDDKVQGGYHSNHA VPDAEAQEVIMPGRKAHASDRW  
WKEAQHE\*

>SPBIB\_v1\_290175|ID:27163700|nuoD| NADH-quinone oxidoreductase subunit D [Uncultured spirochete bib]

MSEKMNIIVTVNDGRTL YPGASAPENREYNMFIGPNHPGIEGNFALKLTLEGDTIVQARTD  
AGYLHRGFMEQRL YMQNIAIVPRICVDPDPNEENYARAIEAIAHIEVPRRAQFIRV  
MMLELSRIASHLFAFGGFAGTLGLYTMPNWSISDRDRILELFEALTGARIYHIYIIPGGV  
RRDLPEGFAQRVKDTLFYIESKLPEYDNLLFENSIIRKRSRIGVIPPEKAMEWGVTPGN  
LRAAGFAHDVRIDDPYEVYNELEFDPIAHESDALARMLVRRKEVEESIRIIRQVLDKMP  
SGPVWNKQPNNPLKWKVPAGDAYVRTESSKGEYAYYMVSNGDVRPYRVHVRGASVTHGVHV  
LEKLLIGTRIEDASQVMFSLDACPEVDR\*

>SPBIB\_v1\_290176|ID:27163701| 4Fe-4S ferredoxin iron-sulfur binding domain protein (modular protein) [Uncultured spirochete bib]

MFNPGSILKPLTALRYLGEKPDITIKVPFVERPAADRYRGFHINDLDKCIGCGTCAEICDN  
DAIRMVPVEGKEAGVGRGTQYRPAIDYGRCCWCALCVDVCTTGSLKMTREYIHISPDANSF  
FILPNEKSIHGESAPKEGWTADKQVNFLDLDRVPMKELSAEERGDSFIEIVKGFSGKEEAI  
KEASRCVSCGLCTAVCPANMNIPEYIEAIWNDDIHEAGRQMYKTNPLSDVCGRICTHKCE  
TACSIGNRGKPLSIRWLKRYAMDAIPQEQYLSLVDQNVKKGKVAIVGSGPSGLSASY  
YLALMGYEVTVFAYPKAGGMMRYGIPSYRLPDAVLDKDIGLIESLGVTIKTGTRVGKDV  
QFEDLHQQFDAVLIATGFHEGRSTKVPDTHPMVFAIDLLSRIRRGIEFPVEKEIVVIG  
GGNVAMDIARSLARLQKQKYGEVHLIVTSLETRDIMPADKEEIEEAEIEGIVFHPGRGPE  
EVLIEDSNIVGLKTSRCTR VFDEQKRFPNPAFDKNDIEIYKGNMVEAIGQGNMSYLGDY  
ATKLEYDGRRIKVTPTYQSSLGWLFVAGDIIKGPDVINGVAVGHKAAIGIDEYLAQTPDD  
HVTTIDDCIKIAREYEKQEIRQLDALLKNKDLQEA EFGEGAAALGLVLQELLDQHNRNLA  
QLLMLLGNENFRIHLRQELKREL RARDFSRYANLAPLPGTPGGAPFSEGD LVAFLALREQ  
KGFELYNDIFYLSGHKEFEFIIESLREAQRKA VEKVEAL\*

>SPBIB\_v1\_290177|ID:27163702| protein of unknown function [Uncultured spirochete bib]

MEIPLRLVARKDGSIFYGISLSFRLVMGGMLILLGAAIVLEEFRA GPIGWIAIFLLLLGV  
IYKEDWLFVDVNTKTVSGLVGFYPM LKKTQLTFEEIGYIQLAAFSKGTVPGSKEEESSNRD  
AFESMRGKDSREGFKSSFD FARRKKLYIALLLITKNEEHYLLDMTPARRAIRLAQAGKAL  
AALIGCSFLDNIAE\*

>SPBIB\_v1\_290178|ID:27163703| Transcription factor/trp operon repressor (modular protein) [Uncultured spirochete bib]

MSRNPPELMRESIAEMASALEGADSALIEQFFYSLFTVAEAEDEIAKRWALVKELAKGTPQR  
KIAENLGLSLCKITRGSRELKPKGSPFRQLLDRLASLTATAADQNAQPDPSPPE\*

>SPBIB\_v1\_290179|ID:27163704| Phosphoglycerate kinase [Uncultured spirochete bib]

MQGPRLKIRPVTELELHGKTVIFRPDINSXIDPTTKRIVNTNRIEKTVP TNLMLERGAK  
VALIAHQGD TLDYQNLPLAEHAEILSRLSGHRVSYIXDVC GPAAQA AVKALXPGEAVIL  
GNLRYLAXEISTFETVVKLTAEEMXQXWLV RSLAPLADYVND AF AAAHRNAPSMVAFQE  
ILPTXGGIQLMEEXTALKSV MENPRXPCVYVLGGAKISDXFDMMRKVLT DGSADYILTAG  
VTGIVMHIARGVDFGPTITKFLADRALDTFIXEAKSLLXXXXSHYVLPVDFAYDAXVGQG  
APXSAQAGTKPGQSTSHNSKPVRAEAPVGS LPKDRLLPDVGRQTIELFKEYIGKAGSIFV  
NGPAGMYEHEPWS DGTREIWQAIADAPGYTVIGGGDTITAA TRFTDL SKYGYVCTGGGAM  
VRFLAGKRLPLIEAMERAFERNLQAPLRR\*

>SPBIB\_v1\_290180|ID:27163705|gap| Glyceraldehyde-3-phosphate dehydrogenase [Uncultured spirochete bib]

MAKVKVG VAGYGVIGQRLADGVALQGD MELVGVADXAVT LSVRALREKGM PYKFFLA APE  
KREEDKAGIPVSGTLEDLVQQVDVMLDATSAGV GAKNRLLYEKEYGKKAIFQGGEKNSVA  
DVFFHGYANYEKGIGAQFLKLTSCNTTGLIRAVDCIDRKVXVEKVAIT IRRVADPGDYH  
RGLTNALQIDKAPSHQALDLMTIMPHVDATGILVHTPVTHGHIITVVATXKKS VTPENVI  
EFFREHPRIRVVSIAE GFLGNASLFRYARDLGNPRGDMYEIAAWEDTVVMSGKDVMFAIN  
VPQEAVVIPENMDAVRACMRMQLDRXEATD TTNRXLGIGKWRNPG\*

>SPBIB\_v1\_290181|ID:27163706|iolE| Inosose dehydratase [Uncultured spirochete bib]

MEKNIRLAIAPIGWTNDDMPELGGEIPFEQCVSEMALAGFEGSEVGNKYPRDPEVLNKAL  
KLRGLTICNAWFSSFLT TTKPLKEVERDFVQQCDFLYAVGARVIGAAEQGNSIQGKPLPVF  
DAKPRFTKDEWKRVTEGLNHLGAVAKQKGMRLVYHHHMG TGVTTEEIDRFMEMTDPDLV  
GLLYDTGHLVFSGEDHLAVLKKYLKRIWHVHLKNVRFDVVERAKREKWSFLQAVRNGAFT  
VPGDGGLD FAPVFEILKNAGYKGWVVEAEQDPALANPLEYAIKARQYIREKAGI\*

>SPBIB\_v1\_290182|ID:27163707|iolD| 3D-(3,5/4)-trihydroxycyclohexane-1,2-dione hydrolase [Uncultured spirochete]

bib]

METIRMTVGGQAIVRFLDNQYIEFDGKVEKFVGGVIGIFGHGVVVLGEALAAPGHNLPI  
QAKNEQGAGHVAIGYAKQNNRRKIMAVTSSIGPGALNMVTAASTATVNHIPVLFPLPGDVF  
ADRQDPVLLQLEVPHDATISANDAFRPVSRFYDRLTRPEQIMTALIHAMSVLTPAQGG  
AVTIALPQDVQGVAYDYVPVELFDQRIHHIERRPPTSAQVARIVSLIKSAEKPYVICGGGV  
RYSEAGRALADFCKKFDIPLGETQAGKGSVPWDHPCNLSGIGVTGSLAANRLAKEADLII  
GVGTRFGDFTTCSKWLFQNPVKARFVSINVAPFDANKMNAEPIIADAKLTLLAMSRALGAA  
DYKARWGDKIARAREWAREVDSLTYQEDPMGLSQIRVIGELNDVLLPKNAIVVSGSGSI  
PSDMQRTWRTRVPGTYHMEYGFSCMGYEIAASLGAKLAMPERECVAIVGDGAYTMLHTEL  
LTAVQEGRKIIVVCDNSGFQCIDNLQHSQGIAHFGNEWKRDPETGLLAGEQVQVDFAK  
NAESWGALGLRARTVEEFRKAVRRALRAKGPVVIHARVSPKSMTHGYESWWRVGTAEVSD  
NPEVVRAAEEMKAELAKARKF\*

>SPBIB\_v1\_290183|ID:27163708| Myo-inositol catabolism IolB domain protein [Uncultured spirochete bib]

MVLHHS GDY AEGYELLVLRSGDRAHMLMDFASLSLQKGT SWRSNANDERAFLLAEGMVEF  
LVSTKVEWVGSSSEDWIPDLKSIYIESLAEGGTRIRASRTS LLEENPIVLHLPAGTEVEIQ  
ALSERAVLYVSATSNDARFAPRLYLPFECQTEFRNEGTLQETSTRIVRTVFNKTNAPWSN  
LVLGEVVNQGRWSSYPHHPQPEIYHYRFYPEQGFGMTALGTEAYLVRNRD TLLITDS  
KDHPQVAAPGYAMWYLWVIRHLDGNPYISPEFNPDHVWVDKPGAQIWEMRRERQ\*

>SPBIB\_v1\_290184|ID:27163709|yrbE| Uncharacterized oxidoreductase YrbE [Uncultured spirochete bib]

MSDKITVGVIGAGRIGKIHVSNIVYYMPEARVKT VADANLTPEIEAWAKSLGIPHVTKDA  
EEMLRDPEISVVLICSSDTHADYIIKAAHAGKHIFCEKPV DLTIAKVKAALAAVKEAGV  
RLQIGFNRRFDHNF AHIRELAKSGALGQVQLVKITSRDP APPPLAYVKVSGGIFLDMTIH  
DFDMARFQAGSEVEEVFASGAVLVDPEIGKAGDVDTA IITLKFANGALGVIDNSRKA VYG  
YDQRVEVFGSGGCAATENDTPSQVRLSDGSGVHGDKPL YFFLERYRDAFIAEMRAFFEAI  
KTGSETPVTGNDGLMNLAIGLAAKSLAEHRPVKVSEVL\*

>SPBIB\_v1\_290185|ID:27163710| Xylose isomerase domain protein TIM barrel [Uncultured spirochete bib]

MIETRRFALNRIAAPALRLAEFFGLAAELGLSAVELRNDIR DGAVTNGLKASEVVQLARE  
AGVRIITINALQQFNLPSARAKALDELDSLALCKEIECPALV LCPNNRADDARSPEQKY  
HDTVEALNTYAPLFSAAAGVLGYVEPLGFSISSLASAEVALKAIHESGASCYRVLVDTFHS  
YLGPDSPAMFDDPAVIQKIGLVHVSVEASIPKQSFSDAHRV LPGAADV MNSAALMARLE  
KAGYRGMYSFEPFSAEVQALGAKELASALRASIEYLSHA\*

>SPBIB\_v1\_290186|ID:27163711| Inner-membrane translocator [Uncultured spirochete bib]

MAQQSDVVGKFINRYAIFIVLVVMIVVLSFLSPSFLTAQNLINVLITESGRGILAIGVAFT  
IISRGIDLSVGSIVSLTSVIAASLVQEPSYSARIFPNLPLLPPIVA VIAGLSAGTIVGIT  
NGALIA YTAIPPIATLGSMIARGLALILTNA YPVPMLRPEFKIIGQLLGPIPVVIV  
FALVALIAYVILSHTRFGKNVYAIGGNVNAARTSGIKVSKNLIAYAVSGFCASIAGILI  
TARAASGIATLGNNYELDAIAAATIGGTSHTGGIGTVPGI IAGILILGILNGLLLGIS  
PYLQQVIKGVIIIVSAVVFDMRKNARQK\*

>SPBIB\_v1\_290187|ID:27163712|mgIA| fused methyl-galactoside transporter subunits of ABC superfamily: ATP-binding components [Uncultured spirochete bib]

MEDYILEMKGIVRTFPGVRALNGVDLQVKTGRVHGLMGENGAGKSTLMKCLVGINPPDSG  
EIWLRGKKVTIPNPYTALKLGIAMIYQELNPV LERSVMENIWLGREPMMRGAAGFLVDHK  
AMYEQTRQLLSELEIDIDPKIKVKELSVAKMQMIEIAKAYS NADIVIMDEPTSALTPNE  
VKHLFDMIRKLKERNVAVIYITHKMEEIFQIAD ETVT LRDGNHIITEPIEKMTIDSLISA  
MVGRRLTEMFPKMESKIGDVKMSVRHLEVPGLLHDISFDLRKGEILGVAGLVGAGRTELM  
EALFGLRQRSAGEILIDGKKTDIRTPADA IKA GIGFLTEDRRLNGIIPVLSVKINTIVAN  
LAHYTKFGVFLNHKKISKDC EYKERL KIRTPSLEALIQNLSGGNQKVLVARWLLTNPE  
ILILDEPTRGIDVGAKAEIHTITKLACEGKSIIMVSSEMPEILGMSDRILVVS RQITA  
VLDRKEADQETIMRYAAAKYNNNQVA\*

>SPBIB\_v1\_290188|ID:27163713| Periplasmic binding protein/LacI transcriptional regulator [Uncultured spirochete bib]

MSIGKKLILAVIALTLVAGTAFQAQTYHIGVTLYDRDQFIS SLEQAILEAAKKYPNVVVD  
SQDAKQDVNQMAQVDVFATKKYDAVIVNLINTDTVETIIQR ARGIPVIFVNRPRDAVI  
DGVKTA YVGSQEYDAGRMQGEFLAKFFKGT ELYVLFMGQLG LENTNERTRGVKETLEK

AGFKLVKVVYEDTAEWDRWKAMNQMQQLLGTGKQFDVVICNNDDEMALGAIEAMKALKMDLK  
KIPVVGIDATPPAKEAVKKGEMAMTVFQNAKAQGAVALDFALKAAQGQKIEKFGWVPFEP  
VTIENVAKY\*

>SPBIB\_v1\_290189|ID:27163714| Oxidoreductase, NAD-binding domain protein [Uncultured spirochete bib]  
MNKVKIGIVGLGRLGKRHAYNLANLVPGAELIAACSPIRAECEWAGTELGVPELYASFDE  
MLEQASLDAVWIASSTYHAQQALAAALERGLHVFVEKPMGVTLEECAEIERAVQAHSNQV  
FLVGFVRRFDPSYRYAKDLIEAGKIGTPFLVRSQTCDLDEYAEFQLEFVKTGGGIFLDMN  
VHDIDLARWFIGSEIAEVHVSVGGSFVHQGFATLGDADNTVCLATFKNGAIAVLSASRTAF  
HGHDTHTEIVGTKGILKIGTTPRKNRVEIFDSAGARTDCVRDFYERFEEGFITEAREFVA  
CIREGRKPEIRPDGTAATRVMAMTESFRKGTVVKLQI\*

>SPBIB\_v1\_290190|ID:27163715| conserved membrane protein of unknown function [Uncultured spirochete bib]  
MLVEKRFFPLYIVLFCVYTLFGISMTVIGATLPKIFADFGWSYTTAGAVIALGSGVGYFLS  
SYVAGILLSALGFRLTISFALLFIFIGLEFFAATPTPWLNMLLYFIVGVGGGIELAVDW  
GTLRMEGPGGGRAMSLMHGAFSIGAFVGPLIAILISARLQWTLVYRGIGVLFLLIAIFL  
QFMPLSALGRDRGHAPGSSRRDLFKHPAYWLGFFALFVYVGVELGISNWIAEYFVSVFKT  
PIPTGSFMVSLFWAGLLGRFGLPVIQRSITREKILISLSVMAVSVIGLATVGFGLGTGA  
LLNVIAGMLVMLSGFGCSIYPTVMSIIGDFFPHTQSEA VGFAAMGGGMGGFAFPYLMMSG  
ISAAWGIRTGFLTYALFSLVIVALNVSIVRAEHNGGIKST\*

>SPBIB\_v1\_290191|ID:27163716| protein of unknown function [Uncultured spirochete bib]  
MKADRRRTADYRALILPTEGAFFKQSLDENLFRSYDSII\*

>SPBIB\_v1\_290192|ID:27163717| Transcriptional regulator [Uncultured spirochete bib]  
MTSIKDIARLAGVSPSTVSRVLNEREYVREEVRQRVLDIVKEQGYVQNHVARSMVLQRSF  
TIGVVIPYLFNMFQRQLFASMEFFLEQHGYKTQFFFLRWSEASEQAFLRRLKSETLDGII  
FIHELDPNIIYQYIQUERELPVALCTFEKSEFGFPAVHVVEEASASLAVNYLLQKGHRNIA  
LITGEHFSFRQREAGYKKALAAHGLQVNPელიIRAASYNPEAGRASMLTLIKRKQPMSA  
VFAVTDELAIGAMKALYEAGLRVPEDVSVIGLDDIDISAFSTTPGLTTVRQPIFEMGKKA  
DLVCDWIAHGRAQGS AELFSTTIVERESVQARVKE\*

>SPBIB\_v1\_290193|ID:27163718| protein of unknown function [Uncultured spirochete bib]  
MDELMQAIKNAMKSEIDSVTIYSEAAALRAEGDVAQFFALRADEEKRYHNWLLSYKELLG  
GQMPSTNLAAEIQTQHRSPIFSQEFLTRV ASDRHVSAAVSSAVLLELNATQHYQKMAEL  
AKEPHLKAFFNSLSEWEMRHYEELLKIQEESRQFWFEEQQFEPF\*

>SPBIB\_v1\_290194|ID:27163719| ABC-type transport system, periplasmic component [Uncultured spirochete bib]  
MKRMLRALFFILFALGLAGASFAQAKKPALKIAVSIPPMQEWVSRIAGDRASITLVLPPG  
SSPHAFEPSRQLAELGQADIWFTISVEYEYSLRPKVSAMFPKLSIVDVTKNVKFRTL RP  
GEQETGEPASVGQLDPALNDRDQHTWLGYEQAKAEITFIRDTLIAKDPAGTEVYKKNYDA  
YLKEIDAVYNSLRTKLAPLAGSKVFVYHPAFGYFLDMFNITQEAVELGGKEPTQKELTAL  
VELAKKERAKAIFVQAQFSQSAQAQAVAKAVGAAVVPIDPLASDWLANLGRMGQALLNAGQ  
RGK\*

>SPBIB\_v1\_290195|ID:27163720| Sulfate-transporting ATPase [Uncultured spirochete bib]  
MRGKGVSSMGSAVAAKVAAETA AASTAGAVAAPSAAGATECADSINAAEEHLPHPENVA  
IWCQHAFRFKIDIEVFDVVSFHVHRGEFVALTGKNGAGKSTLLKLIVGLLEPSRGKVLVF  
GAPPRGRIESIGYVPQHAGFDPAFPIQVEEVVGMGRSLGSLPIAKHQKKEEIEWALRQAE  
VHDLRARPF SALS GGQRRRVLVARALVGHPKLLVLDEPTANMDMDSEKKFYETLARIKGT  
TTVLIATHDSDFVSALADTVLCVGNVDHPHSVHRHAIERAVNAPAELYGGEVVRVRHDI  
ELPDNACCEGKE\*

>SPBIB\_v1\_290196|ID:27163721| ABC-type transporter, integral membrane subunit [Uncultured spirochete bib]  
MSGFLQALLNPAVPFVRNALIGSVLAAFLFGVLGSLVTVRRIAGLAGAISHTVLGGIGLA  
LFLASRGAPKWSPMLGALVFAILAALTISVSLKAKQREDTVINALWAIGMSLGVVFLA  
KTPGYADPMSYLFGNILLVTSGDLYLLAALNVIVIALVARYYRHIEAASFDEEFAATKGV  
PVTAIYLGLLLIIAIAIVLLQTFVGIVMVIAMTLTPAGTAGYFSRNLAGMMIHATILSLV  
FSVSGLA VSWTFDLPAGAVIVLLSGAVFLAFSIGNMLSKRSKRKADQQTGLEGSA\*

>SPBIB\_v1\_290197|ID:27163722| Ferric uptake regulator, Fur family [Uncultured spirochete bib]  
MTKARMHVLESISRakePLSARQLCERYAQEHDPATYRALHYLEEKGLSDSFILHCSEH  
GTERYYVVHAGEHRHWFHCEHCHRFTDLGLCRFDTLVDQMSKEKGLSVTSHTFYATGICK

ECRDKG\*

>SPBIB\_v1\_290198|ID:27163723| NQR2 and RnfD family protein [Uncultured spirochete bib]  
VIKFLKQPMRKLVLIALAPIYLFISIWMYGLRVVAAAVVVFVCGIATEWLFERKRQGVSE  
AVLVSCALFALAFPPKTPLWILAVGIIFAVAMAKGVYGGFGRNIFNPAIAGRAFYISFA  
IVLSRAYTGFNGFVIGAVDVLSSATPLAQMRAKAVPLSSLVFGLRPGALGESMTLLIVL  
AGVYLILTKTASWKIIVSTLVGGAVTNLILLAVGAALKALPMESLLAGSFLFMSVFMATDP  
VSAPKRQQSHYVYGALIGATAVLIRTFSAFPEGTSFAILFGNTFANLIDIAVDSL VKKAP  
AQAKAPAKPEGGA\*

>SPBIB\_v1\_290199|ID:27163724| FMN-binding domain protein [Uncultured spirochete bib]  
MKLNRNSVIYAAVFTFVVCVAFVILAIANQVTLARVNANKRLESRTAVLKAFLADSTT  
PSSEIDSKYTQLVTEKSVEKATAYTATIDGQTYVAVKLTMPGLWGPITAVLATDPAGTVV  
RGFEIVDQQETPGLGGRISEPWFSQAQFKGKKVLPDGTIAFEQGSQGNFDPNNGTVDAIT  
GASRTSDFVRALVNRSLALARQIGGTL\*

>SPBIB\_v1\_290200|ID:27163725|nqrD| Na(+)-translocating NADH-quinone reductase subunit D [Uncultured spirochete bib]

VSDTGKTSAPAKVSPAGKVMRDGLWYNNPIFVQVLGICSTLAVTNLNRNTLIMVLGVSFA  
TSMGSMTSLALRELIPRKVRMIVQVLVLSFYVIIIIDIVLRAVYQPAISKQLGPYVGLIITN  
CILMGRAEAFASNPPGLAFLDGLANGLGYGWVLLVIAIVREFFGFGSLFGFKLVGDWFT  
PWTIMVMAPS AFLVAIALWIANNYKAKVAAA KAAAPGAAGAPAGQGGKP\*

>SPBIB\_v1\_290201|ID:27163726|nqrE| Na(+)-translocating NADH-quinone reductase subunit E [Uncultured spirochete bib]

MIDAPSVGLLSLFLASILTSNVLLANFLGTCSFISISKDFKSSMGLGVAVTLVIGITAAV  
CWAVLYFIIQPLGIEYLSFIIFIIVIAGVVQMLEMIIDRFSPALYLALGIFLPLITVNCA  
VLGVILFMQIRKYSFPQAVIFGFGSGAGWWLAIMLLASIRKKLDSNNAIPAGLKGITL  
ITIGFMAMAFVGFSGMIAVQ\*

>SPBIB\_v1\_290202|ID:27163727| Ferredoxin--NAD(+) reductase [Uncultured spirochete bib]  
MSPILVGPLTVAGISAVLALIIA VLDKALNNYGDVEISINGGERKLEVKGGSPLLSTLAA  
ENIFVPSACGGRGTCGACKCKVISDVGPHLPTELPFMSPDEIAHNRLSCQVKVRKNI  
ELPRELFSIKKYKTHVEKIRDVTHDIKEVLFALDSGEIDFVSGQYVQLVPPYGD  
QRAYSMSSKPSDKKHVELLIRLVPGGIATTWVHKFLKEGDAVELVGPFGFRVHDT  
PAAMICVAGGSGMAPFKSIFYNLYETSAPFEKDIWYFFGARTSKDMFYLEELRELQAKWPRFHL  
VAALSEPSPEENWAGDTGLITDVLDRYLQTVIPKNDKGWEGYLCGSPGMINACINVMKKN  
GITEDIYYDKFA\*

>SPBIB\_v1\_290203|ID:27163728| conserved protein of unknown function [Uncultured spirochete bib]  
MKQSPADKQAFERMAPGIITAAGFLGFDERSPDRIIAEDERA FEELGLDFNNVADRLEEL  
AHKGEAGLGEPIV GELLVQSGDARGMLPCPWEDGFFHKNAVSVSPADTPLEACVEGEDM  
LIYSEL SIHMLRAHHFCQGRGSPFRLEPTLLKQLLF\*

>SPBIB\_v1\_290204|ID:27163729|pyk| Pyruvate kinase [Uncultured spirochete bib]  
MEKRTKIVATIGPACESLATIKDLIREGVDVFRNLNFSHKTYEEATR DVTMIHEARKALDR  
PVAIMADIKGPAVRLYGYAEEIALKPGTEL TIESADPAGIEKLVSSKPLHVYTNLPDIDR  
ICAIGQKVILMDGYFSGKVVRKAPKAVVVA VENEGGLRPKAHLTLPGVDYPIPFSEKDI  
NDISWAVEKDIDYIALSFVRCATDVEEVRRLVQRTALSQGKTTNIKLIAKIESSRGLENI  
DEIIRAADGIMVARGDMGVEMPIENVPIAQKQIIRKCYLAAKPVITATQMMESMMENPMP  
TRAEVSDVANACFDSTS AVMLSGETAIGKYPVQVVRMMRTVVETVEKEFDYIDFHHDVPP  
EVQNGDIPAIMSYNAVSVAYRCDANALIVLTETGHAARLLSRLRPRMPIYAFLTNERLYH  
QMALNWGVPEFIHSGKGRRLDAVVAE AISICKRKGLLKS GDRVVIVAGLPLAHQGTNMI  
RVETIE\*

>SPBIB\_v1\_290205|ID:27163730| putative tRNA/rRNA methyltransferase (SpoU) [Uncultured spirochete bib]  
VKSERAAKGAMLD SGQAAVMKSGDMRPEIDLELLSKLKEKNLAALGLIVLEGRIVIEKAL  
EAGVVPRLLVCTEAEEYWQEKSRNRTVVQGS AAPQTRTPAQNSSKPKQTGASSFPVRVMN  
HEALCAFVDFK FHRGAI AIAEMPRIRRF EAAQNEL SASQASMLSMARLPRPDDSVARTIY  
ERSREAF LCLWDITDPSNLGALIRTAAGLGASGILLGPGCANPYRKAIRASMGNAF SV  
LWSADLALLDTLRLGGAEIVGATLSEQAVSLDVWAAQQGGFLILILGNEGYGLPQEVLSR  
CTSEVSIPMARGVDSLNVAVAGGILMYELFGKIRGTEKESQQKALKKVPKLGINGDRYPD

SVDLIREDRREQ\*

>SPBIB\_v1\_290206|ID:27163731| Extracellular solute-binding protein family 1 [Uncultured spirochete bib]  
MKRKSIAMAFLLIVAFGFLAVQGAFQAQKSRLVFMTAGDVNMLALGQNVFAPGFMAENPNV  
QVITIHTGPGNAGSQTIYEKLLAEKKANKAAGDVDVALVHEIFMKWSMDQDLLQPYAQMT  
NTWKYVTSFPAKTSLGINIEGYVMPLFQSQTAIAYNPDYVKNPPKSYAELKEWVKKNPBK  
FGYNGIKGGASGVAFVMGWVYAETGKYKKYAVTGPFDKAEVDSWEPAYKALKEFNKNIVI  
TAGNVGTLDALNRGEIWMGPVWVDMFFTFMNEGKLDPKMRLALPEPGMPGQPMFFVIPKN  
APNELSRKFIEYVTSPIQANEIVIRFNWYPGIDGSALKGSIPQEVFDKIYRDVTPADL  
QKKGLAFPLADYYNAMLEAYERWAQ\*

>SPBIB\_v1\_290207|ID:27163732| Binding-protein-dependent transport systems inner membrane component [Uncultured spirochete bib]

MTSLQPKMWGERKLPPYVLLLFPVTFMVLMYAWPFISSVLQSFIIISGKEGGLTLANYVK  
VWELYRKDIAFTFAVTIFNTFLVGVVAVIFSUYFRLRQNRVSALLSAIFKLPIFIPFVVV  
SQMMNSFLAPHGLLNTALAQLGLVNLDPKPLQLFNFAGLSFGFAWKQIPFVLIHGGGFQM  
IDNSYIEAARSIGAKLPSVILRVLPVPMNKSSIIIVALVLVYSQIIGTFTLPYMLIGGKVPT  
TITVDIAHRVNYFRDFGVANALGVCSYIMVLFATAAYLRSKIKEARQEVSQ\*

>SPBIB\_v1\_290208|ID:27163733| Binding-protein-dependent transport systems inner membrane component [Uncultured spirochete bib]

MKRILKKS AELALLVTVFLIVIGPMVSLFLWSVAQKWYWPHPLPQAITFDYWAQALGLKT  
SLAIGAVSIVSAFTLSILIALATVVIAMAIAIPAGYALAKYKIPFGTIILFLFLLPNAFP  
QQPVFVNILQVFTKIGLSGTIPGVMLIHILVGLVYGVWITNATFRSIPPSMEEAARSVGA  
TAFKAFYKISLPLAAPGLFSSAVFVFLTSLDEFTGTFFIGLPFINTLPLTLYSSSGYNMQ  
FASVIALILLVPSVIFMLLIQKVLKAEYVGGMG\*

>SPBIB\_v1\_290209|ID:27163734|fbpC| Fe(3+) ions import ATP-binding protein FbpC [Uncultured spirochete bib]

MAELVLKDLVIKYGKVTALNRLNLTIKDGELVTLLGSPGCGKTTTLRSVSGFLPVQEGDI  
FLNGKRITDIAPENRGIGLVFQNYALWPHMTVFKNLAFGLELRKLPAAEIKKRVA AVLAS  
VKMDEYADRFPRLSGGQQRIALARAIILEPDILLDEPLSNLDALLREQMRFEIAAIH  
NRLGITMYVTHDQTEAMVISNRIVVMRNGKVMQEGKPEDIMRPRNKFFVAGFMGTTCFL  
EGIVERFDGERCILKTNDGFELYGIGTELQIGHKAYAAVRPEYILLGKRAEASYGSSERN  
CFKAIVDRSNFTGELLDYQLKLSNFIRAKEYEAKTIYGIGQTVDVKIDEERLPVHDTD  
PEAVAV\*

>SPBIB\_v1\_290210|ID:27163735| putative Ribonuclease Z [Uncultured spirochete bib]

MRLCFFGTSSAIP SARNGYTSFLIELANKTVLVDTGDNAIRSMLEMGRDPMMLDAILLTH  
EHADHLGAFPAFIAALECMNRKTKLLVIMQPELEKRVLTLLALFDYYPEQLHFELEFAAE  
WHTDGLKIDLLPGNHSKFTMMPRFVADNRTLLYTADTRYKAGQYAALGAACHTLIHEATY  
SHPKLPQDTRHSSALEAGMAASEIGARNLFLCHFQDDAYKNPTEPAIEAAQSFSGGEIIVP  
GLMQWYTIKED\*

>SPBIB\_v1\_290211|ID:27163736| putative HTH-type transcriptional regulator DegA [Uncultured spirochete bib]

VTNATIEDVAKACGLSRATVSRVINGEPNVKPLTIEKVKKAIAELGYHPNIHAQALSGGG  
AKTVGIMLPRIWRSYSSLLSSIEEVAAQEGYYALIMAKDYLNKNAERIFDEGRVDGFIFR  
NMDHVEEHERLFLRLRKRNVFVLIGNPLRDYPAITIDNVGGGRAVAKHFAMHGFRKIVY  
LGGPSDNVDSNDRYFGFRIGFEESGMNPEGILRINGDYSTKSGYNAISEIMLTQKPAIF  
AANDRMALGAILYLHKNVCVVPQDIAIAGFDDSYFAKYITPALTTVRQPFREMGTAAAMKQ  
LCSMLKGSSANPGKIILPAKFIVRASCPCPYSHDDSLDVLDAVENSE\*

>SPBIB\_v1\_290212|ID:27163737| putative Major facilitator superfamily MFS\_1 [Uncultured spirochete bib]

MEHTSYRVYPYRWVILAATMLVNFTIQTWIAYSPTSAAAAAYSVSEMAVGGFFAMSFMI  
AFVFPFSIPASWLIDRFYVWTVGAASMAVGIFGLLRGAAGHNYALAFVTCGIAVAQPFL  
LNSWTKIPAAWFPARERATAVGLITIASILGTAAGLVLPMLAERMSIAQVQLVYGVAAAS  
VAAGVFVLAAREKPRLPDESACRERAFMIEGLKHALRTPSFVRFLVIAFIGMGIFNGVT  
TWVEGIVRPRGIGSSQAGMLGAIMLVGGVAGAVIIPFFSDRSARRTPFIILGLAGAIPGL  
LGLALAPGFALIAASAFVLGFFLIAVNPVGMQYAAEVARPTPEGTSNGLVTLAQVSVLL  
VYAMEAINNATGSFTTSLMAVTALLAFSVFWGTRLEEKTKGKES\*

>SPBIB\_v1\_290213|ID:27163738|yoeB| toxin of the YoeB-YefM toxin-antitoxin system [Uncultured spirochete bib]

MKLLFSEHAWEDYLFWQNSDPTMLQRINQLILEIQRTPFSGKKGKPEPLKFALKGYWSRRI



TEEHRIYKVVEDTVFIAQLRYHY\*

>SPBIB\_v1\_290214|ID:27163739|yefM| antitoxin of the YoeB-YefM toxin-antitoxin system [Uncultured spirochete bib]

MEAITYTKARANLAKTMDLVCDNHDPVIITRNSDQAVVLSLEDYQSLEETSULLKSPAN  
ARRLLESIQQLESQHGIEHSIDS\*

>SPBIB\_v1\_290215|ID:27163740|glpK| glycerol kinase [Uncultured spirochete bib]

MRYNTPMDRNSNYILALDQGTTSRILFNHGDGIIIGVKQIPFRQIFPKPGWVEHDAEEI  
WQTQLAAARGAIEAAQIESGQIAAIGITNQRETTVVWERATGKPVYNAIVWQCRRSSGIC  
DELGRGAPEIRARTGLVLDAYFSGTKLWLFREYPELRARAERGELMFGTIDSWLIYN  
LTGAHATDPSNASRTMLFNIYERRWDEELLRLLEVPQILPEVRPSSGIFGKAKRELFGA  
EIPVAGVAGDQQAALFGHACFEPGDVKNTYGTGCFTLMNTGPFVSKHNLLTTVAWDLG  
KGYTYALEGSVFIAGAVIQWLRDQMDLLADSAESEQLARSVEDSQGVYIVPAFVGLGAPY  
WDSEARGTVVGLTRGTSRAHFVRAALESIA YQSMDFEAMKKDSGRALSCIKADGGASAN  
SFLMQFQADITGTRVILPEVSETTALGAA YLAGLAIGYWSGLDDVRKNWRMRREFMPRMA  
EEVRAELIDGWRKAVATARNFR\*

>SPBIB\_v1\_290216|ID:27163741| SagB-type dehydrogenase domain protein [Uncultured spirochete bib]

MQYERFEGRWFLKSNWHLVKSGQSDQMKGVPVPLQEEPPAPEDCVISLPPPALLAHDGG  
AAGSVASNALSTALYRMLVGRKSRRKYSKEPLSLEELSYLLWAIEGVKENKKGKFSFRTP  
SGGARHPLDVYVFAHKIKNLNVGLYR YLPVEHQLVLERQGDSEALDEALNGQFWNAACI  
VMWAAVPYRSEWRYGKAADKLVALDAGHSCQNL YLACEALGLGTCAIGAYDQEKLDAYLG  
LDGEDMFALYAAPVVKLQGGGA\*

>SPBIB\_v1\_290217|ID:27163742| conserved protein of unknown function [Uncultured spirochete bib]

MTIDTVKLAPEDCNIIVGQSHFIKTVEDVAEIMVSSVPGVKFGLAFNEASGPCLVRTEG  
SDPALIEAAQKMALSVGAGHTFYLVIGPGAYPINVLDRIKASPEVCRIFCATANPVEVVR  
SVTEQGAAILGVVDGFAPKGVESDKAARKAMLRKFGYKF\*

>SPBIB\_v1\_290218|ID:27163743| Achromobactin ABC transporter, ATP-binding protein CbrD family protein (fragment) [Uncultured spirochete bib]

MSPERLPRHIPGIPETSRGLVEPQLAGSRLAGITFKQNEAPGRASLEASSLAIGWEQGRK  
KHILAQNISFKVYAGHLVALVGPNGAGKSSLLRTIAGLQAPCGLLSLLGKNIAQIPVEE  
RASLLACVFNERMESGYLTVSEFVAFGRYPYTNARNRLTSEDKHKIAAALALVGMNSFAQ  
RTFVSLSDGEKQKVQIARAVAQDTPVLVLDEPTAFLDAPSRIEIFRLAERLAQEAGRAVV  
LCTHEVDLALKTADELWVLDREHRFTAGAPFVVARSGAIGRAFDLPTVAFDSL TGTFRPR  
SAR\*

>SPBIB\_v1\_290219|ID:27163744| Transport system permease protein [Uncultured spirochete bib]

MLVWLGLCVLILALIDISIGSVRIPLVDVWNTLAGKPPSPEWAAIIRIFRLPKLATAIVA  
GASLSISGLVLQSIFRNPLAGPDSLIGAGASIGVAVLMFAGSAVGALGAGAGGVGVAGG  
ALLGNL PALGYTLLVVAASAGAGAVLLVILVISRRFEQVVTVLIMGLLVGYLTSSIVSLL  
VYFGSPQKVQLYLAWTYGSFGGVRTGELPYLAGAAALGFVLIIGETKALNAFLISERFAS  
TIGIRVRTSRTKLLIAASILAGSVTAFCGPIAFLGIAAPHGARMLTRSAEHRILVPSAAL  
IGICFALLADILSSLPGKGA VLPINPLLALIGSPIIISMFFRREKGPIGEEAR\*

>SPBIB\_v1\_290220|ID:27163745| Periplasmic binding protein (fragment) [Uncultured spirochete bib]

MRRTVGIFLAFLFIASSTCAFAQSGGLQAGSQTGAQIGPQTSVQIAAQAGVPAGSQIRAGF  
SIEQRTGYKILTVSNLWPGANATRTYVLYPRGSQPPKDIKADLFIQVPVQRVLYSTTYI  
PALEGIGELEAIVGVDNASYVYSPALRERI QAGKVIETSKNWMPDIERLIALKPDVIFNY  
GLGNEWDTFPMQEVGLPVVLLGDWNEQDPIARAQWAVFIAAFFNKEEKALERVNALAKA  
YTTLKSLAAGSATRPKVLVNGPFRGIWTVSGGQSF MARI IQDAGGDYLVADSKDTGGLNL  
SIEAVFERAMRADIWLNVPVYGANRIADIRALDPRFAALPVLQKGQIWTNELRMSPGGSND  
YFESAVMNP NLVLADLIAIFHPELLPGHKFMYYKLLNE\*

>SPBIB\_v1\_290221|ID:27163746|proB| Glutamate 5-kinase [Uncultured spirochete bib]

MQLSELAEEAAKAETAATEVETKATPEATAEAAAARAALAKANRIVVKIGTATITKPAS  
TPARLTRAFSPDGKSFLPEESATAGGRTNIDTA YIYHVAEQFAGLVQEGKQIILVTSGAI  
GMGARELGLTKRVTEVRMRQACAAIGQPILMEEYRRAFGVFGLVAAQLLVTRDEWDDRAS  
YLNLRVETLLESRVIPVFNENDSVSTAEIGNAFGDNDRLSA YVASKIDAELLIILSDV  
DSL YDSDPRENPNAKPIPVRELSEKHLAAAGGRGSEFSTGGMKTKLAAVAIARDAGCRV

VIAHGREPVIARVAAGEPIGTLFDAHALKNRIRWLKNSQPRGRLTIDQGALAAIRERN  
SLLPRGVIAVEGDFGRGAVVLVNGVVKIISNFSSAELLAVMGKRSDEIDALLGPDAPHVV  
ARPEEMAFLDE\*

>SPBIB\_v1\_290222|ID:27163747|proA| Gamma-glutamyl phosphate reductase [Uncultured spirochete bib]  
MNMQERLEHASRAAAQLLSVGIEVKNAALMRIAQKLEESREEIARANQRDLAQAQASGLP  
APLLKRLVFDDKKLADVLGIRDLLAMPDPVGRVLEARLLDDGLVLRVSCPIGLIAMIF  
ESRPDALVQMASLAVKSGNAIVLKGGEARASNALASIIARAGEEAGLPQYWLTLLESR  
EEIGELLMYDQYVDL VVPRGSKEFVARIKATSRIPLGHADGVCHVYVHEDADPAMAAAI  
AIDSKTQYPASCNAAEVLLVNFKFGGLTPLLKFLAQAGVVDVCPRTARMISPDIPFNK  
SDDDWSVEYDLRMAVKIVDSLDEAIAHINRYGSGHTDTIVCASPLAARTFMQGVDSASV  
YHNASTRFADGYRYGLGAEVGIATGKLHARGPVGLQGLLTYKWLLEGQGHIVADYASGAK  
RFLHKDLPLDESPHAQ\*

>SPBIB\_v1\_290223|ID:27163748|ykwC| Uncharacterized oxidoreductase YkwC [Uncultured spirochete bib]  
MPQKTIGFIGLGMGGAMAGHIRASGERLLIYTRTKSKAQMLLDAGA EWDRSPKELAH EC  
DVIFTMVGYP SDVEEVYFGPEGLIENARPGAILVDATTSRPDLAVRIYEAAKARGLGALD  
APVSGGDIGAKNATLTIMVGGDEEAFQSVKPLLEV MGKTVIRQGGPGAGQHTKMANQIAV  
AGNLLGAVEAVTYARSAGLDPRRMLLSIANGAAQSWQLSNNVPKMLDGNFDPGFYIKHFL  
KDLRIALDAAHVMKIELPMVALAERLFAKLVAEGMGDLSTHAIYLLYERGLV\*

>SPBIB\_v1\_290224|ID:27163749| protein of unknown function [Uncultured spirochete bib]  
MSDAYDQWQRIFASSAAGFVVHVDGVIADINETAIKILGGADKNDFIGKRFMEDFIHPDF  
HPIIKLRREQLKSGGQVLPVEMRIRRLDGLVDVLSAATGILSGESLYVEVLLIDITSV  
KRRERLLEAFSEMMNITTEEQNPLDIKGAMRHLQQAMQCLYPESAYAGYVSFFSMAKHL P  
FASRTMQKYMQPTVYTFSPLPAGFEKWLMDTASDYSQPWDDDSALTAIIDIPSSVENEGK  
AVLQPFVMDGRAFGCFFWTFKKGGIPIRLDEDKERLKAFLSLAVLSSIKTFFLRQENVQRT  
SDLGILHQATLQIGKIDNLQDIANA VLDILQKEKGWRPAVIRFKSRTADILETTACRPAR  
AMTEEELRLYIRKINDLVRKPGQGMTGYVIEHGEPISLDLPSDPRYIETDPGIRFGIYA  
PIPIEGKVEGAIGVESADYAFSESDL AFLSSLGELTGMAVRSVRLIEVLSERVRWLEILH  
EINLQVGV EAKPEELYGILINRAMKATGAESGALLIYDAEQNVLKSHAARGWLKTITKEP  
FTARDGITGTVFSTGRTRLSPHLEDDPLLSRSRAFVPAGRANIAVPVKAGGMVIGVFHL  
AMKAPVSFSQEFIELVEMFGSYAGIIIRRIQLIDAQRSAQSELRKA YDETLEGWARAIGM  
RDEETLRHTSRVVKIALAIGKAMHLDAQSLEDLRRGALLHDIGKIGIPDSILRKPGLSK  
EEQRIMQTHVSFANELLKPIKYLERAI VVPYSHHERWDGTGYPQQLKGEDIPLLARIFAV  
ADVYDAMTSDRPYRSAHTKDEALIYVRTQAGKHFDPKVVEAFLSVVDSIDAQMDEQ\*

>SPBIB\_v1\_290225|ID:27163750|thyX| Thymidylate synthase ThyX [Uncultured spirochete bib]  
MQDSTIKTARAGECANRTVRKLALQALGLFCYNAPMAHCIVPEAEAILDKEFPVLDKGFV  
RLVDYLGGDQRIVQAARVSYGEGTKSYREDAALIDYLLRHEHTSPFEQVVLTFHIKLPF  
VARQWIRHRTARVNEISGRYSIMKDEFFLPEPEALAPQSEDNKQGRADIPFDPETANRIR  
AILKEGGELSYQQYQRLDLGLAREIARIVLPLSLYTEWYWQIDLHNLFRFLMLRLD SHA  
QREIRQYAEVILDITRKVAPAATASF EKHLHGVRFSGPPEMDELRRRLGLGQHDRADSAE  
SAPGTNQPQFSEPAANQPSSSSVSLLSKKELERFEEKLKSSRQL\*

>SPBIB\_v1\_290226|ID:27163751| putative Glycoside hydrolase clan GH-D [Uncultured spirochete bib]  
MNPTIEATFQKIPGDVLKILFRAREDFSCDEPLLELGEFEVRELCHALGNECRAAEEASG  
QKAVALERSRSRFVWINGWQSWSFAGEIARMERPRRAFYKRVLNVFVDHPAEVALRQRAR  
RFLHRHDIISHFMLGLRSGDLRLALVSDNVARYMG TSAIGAAGVGRASGTASSGSATDEK  
AGDSAVSGARLVDTFGASLYLPPISFLLRGNKIRIFAYAEGGNFRRGQIVARVAVLIAPG  
YFALKDKIAGLWGAHGRFEDLRWLSLEAQS AKGAGFEGGASSGARAGQGSEEP AHPFQG  
VIGGYESWYNHYTAIDERIIGADLASIGANNIVNNYFIRGRPTVFQIDDGWEL AIGDW  
EAHPEKFP SGMAALACRIRDKNLIPGLWLAPFLLMPDSKTAKAHP EWILRDRDGAPVRAG  
WNPNWGGDVWCLDLSLPEVEANLASLFDMVVNEWGYRYLKLDFLYAGLMRGAFAGRKGGA  
WEHYARIMARILEFSIAADGSPV AFLSCGAPIESTAPFMPLMRSGADTREHWEWPQLRLI  
GHQGRPSAKLNMQDSIGRAILDKTL LLLCDPDVIFCRTER TSLKDTEKFLVGMVAAMFGSQ  
IMSSDDPAGFGRVPPQSGQLSEPEFTNQILDWYQRIESKKFGVERSSVRVREVYRFFSRE  
KAVYGMINLS DREQFSDGAPVPKHSMLIFGA\*

>SPBIB\_v1\_290227|ID:27163752| Inorganic diphosphatase [Uncultured spirochete bib]

MSKTVYVIGHKNPDTDSVVA AAAAYAALKRAQGQPQVKAARAGAVNPQTEYIFQRFVPLP  
EFIPDLIPKAEYYIDELPPVIREHTPLWEALVLEQSPRQVMPIVDAIGAYKGLFYNAF  
AKNILTKINPHRKA VIPTSIGHLIDTIKAQPLVPTDCEAMFN GRIVVASLSAERFQDYIH  
AEPAHNKVVLVGDREEVMRIAIEAGVRA LIITNGFIPSKDITKLA EAKGVAILISSYDTS  
STSLALYSTPVISVADASIPIGPRDFMKTAKLAI AASPARAVPIVDDGGKVVGLLTEG  
DLIREPNIELILVDHHEFSQA V DGIQNYHIQEVIDHHRIGTFSTPYPITFINRVVGSTST  
IITSMYRESRTPLDRAIASILLCGILSDTLVFKS ATTTDTDREMADY LASITDLTIEELG  
RDIMGSASLAARLPIDQLLRMDRKEYEVQ GKKLTVS QIELTNSQELLARQEEVLQGLAHI  
RTEMGAYLAALMATDITKFESILYIDADREFYAYLSYPMQQPGIYLKDVLSRKKQLMPA  
LTEMVQAALG\*

>SPBIB\_v1\_290228|ID:27163753| TraB family protein [Uncultured spirochete bib]  
MPQTIRTIQLGERQIILVGT AHISKESIEEAKETIRQE EPGRVCVEIDMGRYQAIQQDSR  
WEQLDIKVLKEGKGFLLANLALAGFQKRLGADLGTKPGEEMMAA IETAQEMGIPWSAI  
DREVQLTLKRAWAKSNLWNKSKLLASLIESAFSREKVS ESDLEKLKESNELESMMNELAE  
FMPSVKEVLIDERDRYLATKIFETTEQKVVA VVGAGHMNGIEQWLGKLRGEVAADVSDI  
EDMPKPGWFAKSAGWLIPLLIVALIAIGFFRS GSQASLAMIERWILLNGSLAALGSLVCM  
AHPVTIIASFLAPVATLNPVLAIGLFAAVIEA YFRKPTVQDAENLADDVTSFKGFYKNR  
ITHILLVFFLSSIGGMIGNFIALPILASRAIG\*

>SPBIB\_v1\_290229|ID:27163754| putative DNA polymerase III, delta subunit [Uncultured spirochete bib]  
MAEALIPPVWILAGPEIGLKEAFVADIIGKARKLGGDEPEVHRIYAGDTLPLEAISLLQN  
SSLFSSWVIVEFRNAEQLSQKADIDALASYCGAPAENTV LLLLETDGYSVPKAI EKTVPSPS  
CRKTFEFELFENELAGWVRCELSGAALTLDEEALESLEL VPHDTAALKAACLILSASFPS  
GTKLAAPDVEAAILRSKPEDAFTLFDRIAQGD LAVSLEVLNSVLDSRRGDANQIIAALVW  
SFRRLQRIGEALARGERFEDVCLREQARSKTIQRQIRAALQRYS PADCRRIIVALSETEG  
AIRGPLGSVFDRLHLLITSITEKGQGLAAAGWSEQGIYPHLVL\*

>SPBIB\_v1\_290230|ID:27163755|lexA| LexA repressor [Uncultured spirochete bib]  
MKDLTSRQKEILNFIHEYIQTNNYPPTVRETARAFSISVKGAYDHLKALEKKGHKTSEK  
RSRSIELIAPPQGDAPVIQIPLLGEIAAGRPIFADENFERTIAIPADLVANRVPHFAVRV  
KGDSMIGAGILSGDIAIEQCETAQNGDIVVALLEENVTLKRFFIENNR YRLQAENPRYA  
PIYTQDLRILGRLRGIYRSY\*

>SPBIB\_v1\_300001|ID:27163756| protein of unknown function [Uncultured spirochete bib]  
MMRLSLYLLGHNYLKPFRIRAHKGMHPRTHAEAAGIPVHLVQH FVQALTGGIRAFLSRCT  
LSETIRRTWEKRWKTPGKDKAEYLPKYALA\*

>SPBIB\_v1\_300002|ID:27163757| Xaa-Pro aminopeptidase [Uncultured spirochete bib]  
VKHSKYSRQAALADELAKRGLGAVMVSDFEHGRDSSLRYLCGQPSDAIFILSAKGTSAL  
IAWDINMASRLGEADHIAAYTDFGRQPQKALAAALKLLDVPKGAKVALPASTPYPDYIDF  
VHALTDFDLVCEKSGVGTFIQEMRARKDTDEIALYRRIASNTDQLIDMIEKEICAGMLLT  
ETDIALFLEREARRMGAEGMGFETLAAGPERSFGIHFPTFTNEHF AAEGLSILDFGARF  
EGYTS DVTMSFVSDSLRTEQKTMVGLVEEAHRIA VEACGPGVPLLSVAKLVDDFFAKAGW  
TMPHSLGHGIGLDAHEAP TLSMRADPSALLEPGHIVTIEPGLYHPEFGGVRL ENDLITE  
NGAEVLTHSRIVRL\*

>SPBIB\_v1\_300003|ID:27163758|pyrC| Dihydroorotase [Uncultured spirochete bib]  
MTDRFVMPMPDDFHAHLRQGEPLMQYARQHAGQFGRVLLMPNTMPPIFNVARL TEYRADV  
ERALAAIPDSERFEPLFTFKILPSMLAAEIESFARAGAIAGKYYPSTTNAADGPRSFD  
DVDEVLSTMEESGLVLCIHGENPEVPVFERERAF LPQVERLLARYPHLRIVLEHLSDEES  
VRFVEQGPANLAATITAHLLFTVDDMIRDSMNPHLYCKPVLKFARDREALRS AVLSGSK  
KFFFGSDSAPHREKKECTAAAPGVYSAPAALPALVELFDSLGLSDALIPFMAEYGAIFY  
GLAAPSRTITLERAPWQVPQLIDGVVPM CAGKTLAWRIWGRN\*

>SPBIB\_v1\_300004|ID:27163759|murA| UDP-N-acetylglucosamine 1-carboxyvinyltransferase [Uncultured spirochete bib]  
MDKYIIEGGYPIKGMLT LSGNKNAALPCIAATTLADEPVILRNIPAI EDVLMFVLRNL  
GASVEEIDAHSWRIDPRSISR YEVP EELARKVRASILFAGPLTARFGKAVLPPP GGDTIG  
RRRIDTHILALQELGARIAEATLNFS AVKLVGAPVFLDEASVTGTENAIMAAVLAEGTT  
TLTNAACEPHVQDLCAMLIQMGAEIEGVGSNRLVIHGKKS LHGVEFAISSDY MELGSFIG

LAAVTGGDLRIEGVRTEDLPLKVGFSKLGVTWDLKGNVLRPNTAAALRVVDPDIGGQIPK  
IDDAPWPGFPADLTSIMTVVATQAEGVALIHEKMFESRMFFVDKLSMGARIVLCDPHRA  
VVYGPSKLVGNMVSVDVRAGMAMVIAALCAEGTSTIHNVYQIERGYENLSARLSAVGAH  
IRKEQED\*

>SPBIB\_v1\_300005|ID:27163760| conserved protein of unknown function [Uncultured spirochete bib]  
MGMFERLKTVISSNINSLISKAENPEKMLNQMIIIDMNEQLIESKKA VAMAI ADEKKLERD  
LMENRAKADEWEKKAMLA VRAGRDDLAKEALLRKQEFEGYANQLAQQWEAQKQSVEKLKE  
ALRQLQSKIEEANRKKNILIARAKRAEAQQRINQTMSSLSGNKSAFDTFERMERKVDIEIE  
ASAEAMKELEEASSGASLEKQFAQLESSPQAADAMLEELKKKMLTEDAGRTSSQP\*

>SPBIB\_v1\_300006|ID:27163761| conserved protein of unknown function [Uncultured spirochete bib]  
MSSLPKIEQYLIDLGISYQEISKNAWLIEDENKGYPKMMVSLSDPIVIISADVMPVPKEN  
AETLFRMLLELNATDLLHGAYAISGNDIIVIDTLEHASLKDDEFASIESISFALLEHYK  
KLASYIHTTEE\*

>SPBIB\_v1\_300007|ID:27163762| protein of unknown function [Uncultured spirochete bib]  
MPSRLLSRIQKIPQAGSDALISSQISSDFPDCAVARFVGAVTDSNLEIVAKSFENILSGG  
IQYLIVDFSAIDDISPAGIGLLALRQKLRDRRGDLILCSMRPRMERMNRVLGLEGYFSA  
AIDISAAKTGLKELTTYVYPISVRCPCDSLIDIDRPGRGRCQTCEAVITAFPDGSITLG

\*

>SPBIB\_v1\_300008|ID:27163763| Short-chain dehydrogenase/reductase SDR [Uncultured spirochete bib]  
MNGIPSGKARGEMVASSTFNRFALVIGGSGGIGRAVSLELVRRGARLLVHGRQAEERMK  
TSSPASLSTFDYAFDSPRNFIQALDARLADMRAEPDIVICAFGPFSEKPLEMVSAEWEY  
LTMANLALPGAMASHFLAGMKARGYGRFLFFGGTRTDAIRPFRKTAAYAAAKTGLGV LAK  
SIAASAGDRNVA AVVVCPGPTDTEYLNAETRARHASLTATGSLLPAKLIAHASLDLIDAD  
PCIASGAIVALDGGFDPESSR\*

>SPBIB\_v1\_300009|ID:27163764| protein of unknown function [Uncultured spirochete bib]  
MKKLLYFEQDSSRIRPIVV ALSKHFEVSVAGDLELAATLRQKEPRILLFGLASLPGAFS  
IHILDRIKQIMLNLHEEKLASRSALS VVMHGDSDRWQQICEPYIAALREIPFCDIYVIP  
AATNPDELAVSIINIKRANRHLRTARMSATAEVPIIGNSTKMRHVIEQIRTYADKHHHPVL  
IVGETGTGKEL AARALHFWGKRSHHFFVALNCATIPETLFESEMFGTERGAYTDASTRMG  
AIEQADNGTLFLDEIGSLSLASQPRLLRVLETGEYRRLGDPHPHSAQFRLVSASCINPID  
LAAKNKFRSDLVYRIADLVIEIPLRHRAEDIPLLA AHFCSHFSKDAFSLEQNALDKLCA  
YHWPGNVRELRSVIARACANNSTGRIFADDIQFLYQWKFEGNSQPEVSA\*

>SPBIB\_v1\_300010|ID:27163765| protein of unknown function [Uncultured spirochete bib]  
MESLNIPCALVEGVRFDFPSRFAISALPYIWDDEKNHQICFVSSSQWNAAKRRDEFSGMI  
ASADLVLPKDRAVAGRVLAAQGAESRSWPVPFVHQMLLDAMHESAEQPELEIPSIEHIPE  
MYRPQKVITLLSAIEQRNGSVFLLGGAPVTLIKAKKNIRATFPGLAIVGSMHGLYRPQE  
EAALIEAIQKSTPMLILAGAPLPSGERWIPHHMAATRSGIFLYHGAILRWFAGS\*

>SPBIB\_v1\_300011|ID:27163766| putative Ribosomal RNA small subunit methyltransferase E [Uncultured spirochete bib]

MRQIVFPGALRGKTA YLLDAKTAHYLIDVRRMKAGDVFEAIDEEGSRFRCTIVSRENEGA  
HVRLESIEPDDLAAQQDRQLQIALVQALPKGQKFDLIRQAVELEVNLIVPVITKFCVAE  
EAPERASKLERRRRIREALQSGSSALTEIVPAARLSELDKVLREHGFDRENSLRIMF  
HESDAANSKPLHELLAHMQNRVAICIGPEGGFSEEDYSALAEMGFMVHHAQGPIMRVETA  
AIFAISAVRVIALEREIWNR\*

>SPBIB\_v1\_300012|ID:27163767| Carboxyl-terminal protease [Uncultured spirochete bib]  
MNETETSEVRTPVERTPVEHTPAEHTPVVRKRLFSLAFVVILALSFITVAVPESYAQQA  
KTPDAKQYSQLLQNIQFILQNYVEEPDPTKLYQGAVKGM LDSLGDYPYSAFLDEDMMSDL  
MSDTTGTGGVGLYISKQTTVPTEDTPRYIEVVSPIEDTPAWKEGIRSGDLITKIDGEDT  
SPLSVDKASAKIRGEAGTTVTLTFKRGNYEFVTFTRSKIEIPA IKNAIITASGNIGYI  
RIVEWNPNTPVRMKA VLQDMHAQGIDRWIIDVRSNPGGLLSSVVDVSDLFLSSGVIVSTK  
GRTISENYEYKAKPDLAIPATDRIIVMTNQGSASASEIFAGAMKDTKRALLLGQKTYGKG  
SVQQIFPLDKAGFKLTMARYYTPSGVNI DKVGI EPDIKVPEPELSDKELAEVQRLYDAGD  
IARFLKNPTPSVEQRKQFAAELA QKYTPALILEKLVRDESERSQPARIYDLEYDVQLQ  
KALDLIESQDFLNQLES AKTLADLKKSTN\*

>SPBIB\_v1\_300013|ID:27163768| membrane protein of unknown function [Uncultured spirochete bib]  
MLVAGILAFIRIFALGVA AVSLGMTDFGGASTAILRVFQLYGLLFFVYLLFLQYFRPSARE  
ALKTPCLLISAAAPVLSVLTLLAFVKGVGKSIPVDLVKTSSSIFVVILMDLLILGLVGM  
SLKAKFPREGGQKQAQSRGVPTVDAPDSPVPAHNSDTTNEVS\*

>SPBIB\_v1\_300014|ID:27163769|lgt| Prolipoprotein diacylglycerol transferase [Uncultured spirochete bib]  
MVAMLEFPKWLSPEIIPGLPFRWYGLMYLIAFSVAWLLFRRESKRLRAPWTEDEAANFFI  
WSIVGILLGGRLAGTLIYEPSNYYWIKPWFIFWPFDESFAVGFQGM SYHGGFVGLIVAT  
LIWCKVNRWNWLDWADLIAVSAPLGYTFGRLGNFINGELWGKVSTAPWAMLPNAERFSA  
KEPWVQEVARAVGIRLVSMNDMVNLPRHPSQLYEALLEGIVLWLVLWFFVRKRRTYRGKS  
VAIYAIGYGVARFIVEYFREPDSGLGYILALGDPQAPTARFVSLFNFSMGQILSFLMIVG  
AVIFMLYARKHFRIAPGEPMFVDAAKRGESGDFGAGRQKGTSGARGTDGIRENSGPRTSK  
FNAPSARKLRKKIK\*

>SPBIB\_v1\_300015|ID:27163770|nadE| putative glutamine-dependent NAD(+) synthetase [Uncultured spirochete bib]  
MRVSLVQMNSTIGDFKGNVDRMLEFVGGQILKAFSATERPDLIVFPEQSICGYPPMDLLDQ  
ESFLFGSISALRRLQKLLPQDIAVGVGYVDKNREGAGKSLVNAYSVLYGGKV VFSQAKTL  
LPTYDVDFDEARYFEPARARQVFSQPFGRVGF AICEDFWWEAPDASQKYSIDPVKELMDAG  
ADILIVPSASPIAGKLQTRLRLAEKAVRAGSIPVLYCNAV GANDSLVFDGRSFAMDERT  
TIRGICGWGEEVLT YD TVSGKAGRLILGAMHGEGATSPTAEIEKSSDA AHTDATEAATTQ  
ATAAQ AIDLQTERSEEIRRALIVGIQDYLRKSGFSRVCLGLSGGIDSALVAVLATQAIGP  
ENVTCIAMPSRFSSAGSLDDAVELCRRNKLRLERIEVPFTAYLNALAGPFAGRPYDTT  
EENLQARIRGTLMAWSNKFNLLTTGNKSELATGYCTLYGDMNGSLAPIADLYKTEVY  
ALAAHINRSAAAQGREEPIPDIIAKAPSAELRHNQKDQDTLPEY PVL DGILRLYIEENR  
TMDEIIDAGFDRATVRKTLEMTAKAEYKRRQAAPAIKVSKRAFGVGRRLPLARTIHEIQ\*

>SPBIB\_v1\_300016|ID:27163771| Glycerophosphoryl diester phosphodiesterase [Uncultured spirochete bib]  
MQHPSLLPDFRPLFAHRGLNRIFLENTIEAFRAAHDAGVPGIELDVHLTLDGALVVFH  
DDTSGRIEKQVNPSAPERNL SIEGSTLAELRALSIGPRIPLDEL FETFGNRMYYDIELK  
CRSASDTGLASSVAASIHRHGLEKHCVISSFNPFALRHFRKAEPDIPIGIIWNKSKELYW  
FLRHGEGTLIANADFLKPEFPIAAHLLLYLRILARRPIVPWTVNDVSIARKLLKGG AEGI  
ISDEADAVRAAVWH\*

>SPBIB\_v1\_300017|ID:27163772| protein of unknown function [Uncultured spirochete bib]  
MTPQELSRLDYEGASEMLLACATDAKKYEKEIASLQAQAAEWKSKARLAQDRNMEELSQA  
ALQKSAELEAKAQELALELNSIQRDIEDLRTALPIIKAKQRSVDPDQLLAELSMLVGL  
TAQTPESDTKPNQNPEEPTPGTRLGALQEGHSPVDDALAE LKKKMGLL\*

>SPBIB\_v1\_300018|ID:27163773| protein of unknown function [Uncultured spirochete bib]  
MNRIAQKVTRFVGLDVHAETISVAIAETGVEVRYLGSISNRPE SVSKLIKKIGTGGKWKS  
LLRSRTDGCIVLAIDKSEDRV\*

>SPBIB\_v1\_300019|ID:27163774| protein of unknown function [Uncultured spirochete bib]  
LYWQLTKARIGCEVIAPALVPMRAGDRAKTDRRDAEQLAQSYRAGELTPVWVPDEAHEAL  
RDLVRAREAAVQDRLRVRHRFKEVFASVWSAAGEKDDAMDTSLPGMDQEGGDV\*

>SPBIB\_v1\_300020|ID:27163775| transposase (fragment) [Uncultured spirochete bib]  
MTPWTLRYLEWIKKEVTFEEEEALQWTL EYMNEVEHCSLRITRLDGLIDKAVENAPEAMR  
EVVAALQALRGIGKVTA VTIVAEVGQLSRFPTARQSMGYIGTVPSEHSSGETIRRGGITK  
TGN AHIRRIIEVAWLQRHKQMLSQAVKLRQERLDPEIQEIALKAMHPLH DRYFRLTARG  
KSKQQVVTA VGRELLGFIWAIGILVERKNA A\*

>SPBIB\_v1\_310001|ID:27163776| conserved protein of unknown function [Uncultured spirochete bib]  
MPMQSFPPFCPNPHCVWHSNAPDFAWAKPKGFYTTKXFGRVQRYQCAACHRTFSSXTFSLA  
YYVKRPVALPDIVARLVSGESLRAMSRNLAVSLNLLSNRIDRLTRQAIXX

>SPBIB\_v1\_310002|ID:27163777| protein of unknown function [Uncultured spirochete bib]  
VAGGTLVALDAAKXLGGIEALGLRPSEIWCVTVPD TVRIRAEREGLHRHLPP\*

>SPBIB\_v1\_310003|ID:27163778|mnmE| tRNA modification GTPase MnmE [Uncultured spirochete bib]  
VAISYWRMPRSYFDRNTPIAALATPEGRSALAVVRTAGANAIELVARCF SNRQALLDAQG  
YQAVYGFIDPSSGEYIDEVIALVFRAPHSFTGENAVEIMSHGSPA VVERILDVLYAQGF  
SPALHGEFSFRAFVQGKTDLVRAEAINELTHASCEAARHDALQRLSGALS RKLGEIRDLM  
VDLLADINAKLDYPEDEGPEESSRWLEIMHHARDALSVLIQSYPGGRLRQEGFLVVIAGR

PNAGKSSLFNLFAREERAIVSPEPGTTRDWIETWISIGEFVRLVDTAGLRSSQNMIIEAE  
GVRRSQSLLERADVILYLVDGVAGLNDEDEFAAKHPEALLWKNADLSRCLPAPEGWIA  
LSAKDVRSFGEFENIVIDRLRSYARTTQKAGTLERQIRIASERQAGLLKQSDLALSQALE  
AYTAGAGLDLVALHIREAAEAIGEITGDIAADEVLERVFSTFCLGK\*  
>SPBIB\_v1\_310004|ID:27163779|mmnG| tRNA uridine 5-carboxymethylaminomethyl modification enzyme MnmG  
[Uncultured spirochete bib]  
MADFEAIVIGGGHAGIEAALALARLGTTLFITQNPDTIGRMSCNPAIGGLSKGNLVREV  
DALGGQMGIADATAIQVRMLNQSRGAAVQAPRAQSDKALYASLARQTLEAQPNTIFMD  
TVTDIIVSEGSSGARAGYAVSAAGTASAPSSRHIEGVRTERGNEISAKVVVLTGTGFM  
KLFIGLWSGSGGRLGEPAAIGLGTALRAKGFVGRMKTGTPARIKRDSIDFSKLEAQYSD  
PRKIFFSFLEQDYNRPDVPYIVYTNQNTHEAIRAGLDRSPLFSGVITGKGPRYCP  
KVVRFDPDRERHQVFIEPEGLSTDEMYLNLSSSLPEDVQERFYHSIPGLEHAVIVR  
VEYDYLDPALYASLESKLV EGLFIAGQTNGTSGYEEAAAQGLMAGINARRKLDGEP  
LGRNEAYIGVLIDDLVTLSPKEPYRMFTSRAEYRLALRHDTADLRLTPYAIEIGLAD  
RECFEKRLQGIDEAKALLSRRKIQKEDSAHIPELEKHIGQTLADAIRDPKVGALLDDE  
ALSHIAQLLPETAAMQASSVLTAVLNERYKGYLEKEERLAARLSKADKMLIPDKFDYS  
KGLSKEASEKLSNQRPLTIGQASRIPGVRKSDVALLYIAISRPSP\*  
>SPBIB\_v1\_310005|ID:27163780| conserved protein of unknown function [Uncultured spirochete bib]  
MAVIKSALELALERTKNLQVDESLOKASEAKLEGRKAASRWLEEPESVDFKALAGAIPE  
HRQTFLRAAFEVLSTQVQLPLNTGIDKAKLEAAGKAIIVLCGLSSRFGSEREAKLAQQQ  
QSLFQQILQFLGQYSEEMKRAEQAIRNQWAPKLKEKERQLAAQLGQNVRIDPMSDPEFA  
FYRKNIDAMRKNYANALEEAKNQLAALCGFATNE\*  
>SPBIB\_v1\_310006|ID:27163781| CDP-alcohol phosphatidyltransferase [Uncultured spirochete bib]  
MDEGERIASLRRSILATTSIFFVAQCALFLIFAVSAGFVTQYWSLFLPISAGFHILLIM  
LLLQDDFVIESNGRKLDRINLANVITLSRVSTLPTLLVLVIAAKQYRIRIPLLLILVALI  
FLTDFDGRISRKTNQVTRVGRMMDSASDYTLVLSVIFQYLLIPGWFFVLVIVRLGI  
QAFMAILIVVRRRIEKPSTFMGKVTVASIMVLYTLEIQLALQERFLLVFRIA EWIVAI  
IIVIGIFDKIVSFFDALKSKPSAP\*  
>SPBIB\_v1\_310007|ID:27163782| CDP-diacylglycerol/glycerol-3-phosphate 3-phosphatidyltransferase [Uncultured  
spirochete bib]  
MTAADKITLSRVIAPLFFFVFMVQFIPRQIAIVLLWIMFGWMELSDLIDGRVARANQQV  
TSFGKLFDPFADVISRVTYFLAFTSIGIMPWWVLVVLYREFGILFLRMLLGLKGIAMGA  
RAGGKLGAGVYMTAGLVSLMLYTVRVTGFLGGVASLLETITIVVYIAAAVLSLASFADYL  
VQFRKLYK\*  
>SPBIB\_v1\_310008|ID:27163783|ilvI| acetolactate synthase III, large subunit [Uncultured spirochete bib]  
MEYTGARILMESLLLQSVDTVFGYPGGSVLYIYDELRYRDRIRHILTSHEQHAHAADG  
YARSTGKTGVCIAATSGPGATNLVTGIATAHMSVPLVAITGNVATSLLGKDSFQEV  
ITMPIIKHNWIVKNVEDLAEVVREAFFIARSGRPGPVLIDIPKDVITAKTEWQAVADAN  
LSVPIPGSAMLSSRRARLSSRNEQTTFSKDKIDQAITMIETSERPFVYAGGGVIASNACE  
LRELIERIKAPVALSLMGISCLPPSHPLYTGLIGMHGVSASNRVQEADLILAVGARFSD  
RVVSRADSFASQAKILQLDIDPAEINKNIQTEHHIIGDLKLVLSRILGGMKSKQELTPPS  
LAQKRAEWLSKVEAWKSIHPEANFKPSAFHPRFIIETVAQRLGEDAIVATDVGQHQIWA  
QFYPPFAKPRTFLSSCGLGTMGSLGFAIGAKTAHRERPVVLTGDSFRMNCGELATAVN  
YHLPILIVILNRTLGMVRQWQTLFYDERYAETTLDKRPPDFVRLAEAYGAAGFRADSKV  
GFLAALDEAMAHIAEGRPAVIDALIDQDEQVLPMPVGGKAIDEQIM\*  
>SPBIB\_v1\_310009|ID:27163784| putative enzyme [Uncultured spirochete bib]  
MAELKITPQMEILDTTLRDGAQGEGISFSLQDKIAVVKALDQLGVSFIEAGNPGSNPKDM  
EFFREAPKLELEHAKLCAFGATRKRGTIPEQDEAIQSLAAQTDITIVIFGKSWDLHVLHV  
LRVSHEENLAMIAETISFFKEKGTVIYDAEHFFDGYRANKEYAMATVQTALSAGADSIV  
LCDTNGGSFPDLIEEGVRTVLGLGSGKVGIIHAHNDAGMAVANSVMAVKAGARHVQGLV  
FGERCNAALAAVIPSIELKLQLHCLPKGKLENITETARLVAEIANVMPDDMPYVGLRA  
FAHKAGMHADGILKTRTSFEHIDPALVGNWRRFLMSEMGGRAAIAERIKKLDPSVTKEHP  
VTAALAAKLSLEAEGWQFEGADASFELLARRELKGYKPLFSIEREYVQSTHPSEEGNIC  
STAWVKVKVDHSTEIAASEGNPVALDSALRQALKRFYPELSKVRLTDYKVRVIDSRSA

TGARVRVLIESTDGVHVWTTIGVSTDIIEASSKALADSIEFSLIQATETKNF\*

>SPBIB\_v1\_310010|ID:27163785|ilvH| acetolactate synthase III, thiamin-dependent, small subunit [Uncultured spirochete bib]

MNRHVVSALVENRSGVLSRVSGLFSRRGFNIDGLTVGETENPSVSRMTIAVTGDEQVLDQ  
IIKQLGKLVAVRELDPASCIRRELMLIKVKADESVRPAVIEIASIFRSRIVDVPST  
ITIEATGDSEKLEGLLLLLRITYGIIELARTGLVAVERGSSILNITI\*

>SPBIB\_v1\_310012|ID:27163787|trkH| Trk system potassium uptake protein TrkH [Uncultured spirochete bib]

MHLKSILRMLSAILMIVSLFILACGFFSITEKNQVRVIVSFFIPAGVGLAFFLFMLFICR  
KDSKPFLLTKRDGFLFVTLVSWVFASAIGALPFVLSGYIPSYIDAFFETMSGFTTTGASILT  
NIEVLPBALLWRATTHWLGGMGIVVLLVAILPTLGFSAIRVIEAEAPGPSIDRIAPHIS  
STAKVLWLIYLGTLGLEVLLLVIIGMTLFDACHAFATMATGGFSPKNASVAYYNSGFVH  
AVITIFMFLAGMNFTLHYRLLSGNLSILKDTFEFRVYFAIFAISSVIIGVDLLVSGMYRN  
FGESLRFSSSQVSSILTTTGFATANFGQWPEVSQTILFFLMFIGGCAGSTGGGKIVIRIV  
VLFKMAVTEMRYVANPRGVYAIFLGNKALRKNVIYDIAALVFLYFAFFISVIVISFSGV  
DILTSVTAVIANLGNIGPGLGKVGPAFNYPFFPWAKLWLAFAMLVGRLEVYTVLILFSR  
KFWRSF\*

>SPBIB\_v1\_310013|ID:27163788| putative TrkA-N domain protein [Uncultured spirochete bib]

MKIAILGAGLLGSLIAHELITENRDVVIIEKNPNVAKAISNDLDCIVEEGDGERLDTLMS  
AGVADADWFIACGSDENIVSCGIVAEAFKNVKTIARTRNPYFASFKNKGKRILGVDYI  
INPEAETAETAIARIIFRGMSPETIDVKEAGIQLRRIHCSSQARIIGKPLSDVRSRSLIGPEF  
MVPVAVMRKGEIVPAGDFVFEEDDSA YILGEP SWLDRLFGPCKSTLRKFSSLVIFGAEAL  
TSLLLQELGIEQIVAHTRRSRDRGALSLLGNPRIKVIDGNREALKALSTTFPDIEPINHQ  
MSEERLIDEENIGSADIVLCLTSHQSINILTALLAQEAGARRTLALVTNDLYSNILDPLN  
INIVINEKTVVSGTILDRVRKAKIRRLYSFPRNEYELIEIQISKSFERLGFERNLNLPK  
GFLVTFIIHESKTIVPTGDTRIQENDLVGLIVKKEQIGRLESIFGA\*

>SPBIB\_v1\_310014|ID:27163789| putative Ktr system potassium uptake protein D [Uncultured spirochete bib]

VSIRIQIGKEKSLILYFTGLIAAGTILFSMPFATKTGSMRFVDALFTATSAVCVTGLTT  
VDTLVSLTRVGGQFVLILLIQLGGLGIIAFSTLYLFSRKRISVITRGFTGDYTVPSVEFRT  
RKIITQIIGWTAGFELLGTLIWPVLSRSGYTLFDSLFAISAFCNAGFSTLRSGMENFR  
DEALMNVTMILICGGLGFIVLQDIARLIQKKLHLYHSSIVLRVSVGLIIGAILFF  
ILENNHAFKGMMSGASKIMASFFQSVTSRTAGFDTVPQAKLTSAAQFVTIILMFIGASPGS  
TGGGIKTTTTFYLMMLVALRFREGGVLVDRNRAVMPYSIFKAAAVVVRAVIIVLA VTVVVL  
LIAEQVHGNPLGIETAIFESVSAFGTVGLSIGITPHLSAVSKLALVSAMFMGRVGLFAMA  
IPSSKYSTERYARSPRADILL\*

>SPBIB\_v1\_310015|ID:27163790| putative TrkA N-terminal domain protein [Uncultured spirochete bib]

MRQFAFVGLGSFAMSMLERIAEITDQIIA VDDDQARIEHVKEMVSTAYTMNLLDGEAFER  
VFHDPVDVAIVDVESNGAAVLLVTFRLKKGVPPIIVKSNSEYEELLRLVGATRNVNSD  
REATRITPLVLSSSLTNFMPISGDLVLAEVIAPDFVLGKTVIETDLRRKHHVNVVAVKH  
SLQRNVNEEAEGVFNDLDIAYRFQAGDVLLVTGKESDVFVFSGVQKTAEHEKKKVNFSVL  
LKSMFSRKKQDDTKK\*

>SPBIB\_v1\_310016|ID:27163791| 8-amino-7-oxononanoate synthase [Uncultured spirochete bib]

MDIFQKCFDFDLKQAMEKGLYPYFQPLDGLGTEAVFHGRRLIMIGSNNYLGLTMHPKV  
REAARKALEEFGPSCTGSRFLNGTLKLHEELARLAAFVKGDAALVFSTGMQTNLGAISA  
LIGRNDVVITDKDDHASIVDGCRLGIGEMKRYVHGDLQLERILQKIPPESGAMVVVDGV  
FSMGGDIVDLPKLVVCHRYGARLYVDDAHSGLVGGGRGTAWHFGLTDKVDLIMGTFSK  
SFASLGGFVAGDKDVINYIKHTARSFIFSASLPAPNAMAFAALEVMETEPEHVQRLWEN  
AHFMMKGFRELGNIGNTQTPPIVIGEDETCFRFWKELFDGGVYTNPVISPAVPEGMA  
LLRTSYMATHTKEQLQRALDIFEKAGKKGFGII\*

>SPBIB\_v1\_310017|ID:27163792| DNA repair protein RadC [Uncultured spirochete bib]

MEEWQAYEKAALSIESSTSPDIRERMVRFSGSISNLDL VVAILGTGIPGKPVRRLLARE  
VLDQITQSTHSFDINKLMVIAGMGEAKSCAVAAAIELGRRIFSTRGTRITMPKDAYPLLI  
HFADLRQEHFIVISLNGGHEVNAVREITKGLINKTVVHPREVFADPITDRACAVIVAHNH  
PSGNLEPSEEDLDITKRLRQSGDILGIPVLDHLVFSETGYFSFVEHGLIAPTK\*

>SPBIB\_v1\_310018|ID:27163793|rbr| Rubrerythrin [Uncultured spirochete bib]

MKSLKGTKTEVNLLTAFAGESQARNRYTYFASKAKEEGFIQIQLIFEETANQEKEHAKRL  
FKFLEGGTAKVTAEPAGVIGTTRENLAEAASGENYEWKEMYPGFAKVAREEGFDAIAAV  
FEAIAVAEKQHAKRYEALMANIDAGR VFKRDKKVVWRCLNCGYLFEGTEPPKVCACAHP  
QAYFELLGENW\*

>SPBIB\_v1\_310019|ID:27163794|dfx| Desulfoferrodoxin [Uncultured spirochete bib]  
MTQKKQIYKCMKCGNIVEVLHEGEGELVCCGPEMMLFVENTTDAAKEKHVPVLEKTKDGW  
WVKVGSVPHPMEEKHYIEWIELLADGNSYRAFLAPGQEPKAFFPVKAQVQAREYCNLHG  
LWKA\*

>SPBIB\_v1\_310020|ID:27163795| conserved protein of unknown function [Uncultured spirochete bib]  
MISREDFVFCIGYDGDTAIVDAKAKKEFGRLSTMELAEKGLYRAAFASALYSEKPEEMQS  
FIEFFNKKAGTQYTEAGQLSRLFGVYLESVSKVKAL\*

>SPBIB\_v1\_310021|ID:27163796| putative SAM-dependent methyltransferase [Uncultured spirochete bib]  
MVFKTYQIEILKHRLSSRSRAFFFTFFCAFLSLLTFLSFPSLPPSARNRYCISMATII  
LKSKEDIRIRRGHPWIYDNEIARVEGEPEPGGEVEVRDARGLHVGYAFFNPNSKIRARVY  
SRTAKKADEEFFVRAFEAAWKWRKFCFGEPAIERRLSRLVYGEADSVPLIVDGFVGGAT  
GTEGLWLSVQFLSLGVEMRKAIEILKALRSVFNPDGIAERSDAPVRALEGLPESVGVWGS  
VPERIVIEENGALFEIDLLGGQKTGWFLDQRANRAAAKYVSRAQWADSPNKAIGARVLD  
MFCNQGGFSVLAAKAGAASVLAVDSSRDALALLRKNAALNSVSDRITIVEANAFDYLRDL  
EKMGRFDLIILDPPAFKNRAALESARRGYKELNLRAMHLLERGGVLVTFSCSHWFSPE  
MFDVLAADAFDSNRRLHILEERTQDLDPILSGYDESRYLKCRIVQVV\*

>SPBIB\_v1\_310022|ID:27163797| conserved protein of unknown function [Uncultured spirochete bib]  
MPRPMKYRIINGRPITNIFKPAGIPQRELEEVILTLDELEALRLADLERKYQEDA AKLMG  
VSRQTFGNIIASARKKVADVLVNGKALRIEGGFVDISGGSFVCLDCRQEWNPSPGSETPH  
NCPHCGSSNIRSRT\*

>SPBIB\_v1\_310023|ID:27163798| Fe-S oxidoreductase [Uncultured spirochete bib]  
MYAYGPVPSRRLGRSVGVSPICEKTCYSYSCVYQCLGRTKTLTKRHSFFPKEAVFADIEK  
VVRANEGKIDYITFVGDGEPTLSLDL GALIHECKQNFYKVA VITNGSLLWMEDVRQDLR  
EADVVNITMATSDPDTFKGMHRPHGSLRFEQVWQGIQQFAAEFKGQIWA EIMLVDMVNTD  
TEAMKSLKTLIDSVHPERTYVMAPTRPPAEPWVHMMPRPETILEALALFGGENVTQLEEGS  
FGLDEFHSAVEAISEICRRHPLRIAQARTIEAYFAQRTLDRLIASGKFKIISYQNRKYVL  
PSEFVFGKQEQS\*

>SPBIB\_v1\_310024|ID:27163799| Cobyric acid ac-diamide synthase (fragment) [Uncultured spirochete bib]  
MCFRPNLSLGSRRNNHRASERNLILVTIMSGKGGVGGKTTVA VSFATQLARRGEK VLLADL  
DVEEPNAGLFLQKQRKDSVDAVVYRPKWREDL CIFCGKCQGFCKFN AIAALPKYIIVFPE  
LCHSCYACSDLCPASALSMVPAKIGQIQQYSVNENLVFIEGRLDIGQEIASTLVRQTRDK  
ALREAQTAGIQWLVFDAAPGTACASREAMIKSDAVILVTEPTPFGLHDMSLAYQLAKASR  
KPCALVINKDSPGYAGIEKFANEEKVPIIARIPYNSRLAQS YSEGNIPVGAFFPALEHALS  
RIASWLLKVRAGGQP\*

>SPBIB\_v1\_310025|ID:27163800| Cobyric acid ac-diamide synthase [Uncultured spirochete bib]  
MIRIAILSGKGGTGKTSVAASFGYLAGKRAVLCDCDVDASN LALVAGAQN IQSREYSGGM  
VAVIDPEACIGCGACARVCRFDAIEKAGPKYRIEAA SCEGCGYCPRVCAFNAISMVERKS  
GDIFTGQSRFDSAIVYAELSIGAENSGKLSTQVRRLADEIAE EKGAEVIIDGPPGVSCP  
AIAAATGTNYILFVSEPTRSGVSDLERAMEMARKLKIPGGVLVNRADINEVLSRKIEAIT  
MQTGNDFWGAIPLSSDFVRAVRNGKTVLEETDDERITSALTQTWRSILERFQKWQ\*

>SPBIB\_v1\_310026|ID:27163801| Dinitrogenase iron-molybdenum cofactor biosynthesis protein (modular protein)  
[Uncultured spirochete bib]  
MALDIGTISEMAITAIMTKTTMGGKLIIFSASENKGKDSFLDDRFGRAAGFVVYEEETD  
QWSWIDNASNVNAAGGAGVQAGQAVVNSGATVYIGAQLGPKAMAVLARSTMKLFAGVPGK  
TARENELFKAGKLEKIE\*

>SPBIB\_v1\_310027|ID:27163802|radA| DNA repair protein RadA homolog [Uncultured spirochete bib]  
MKKPSIIFRCSACGHEEPKWLGRCPCEGQWNTMLEAKTAGRF EKDSSAFSLPLESVNPAL  
GTRVSSGISELDRVLGGGFMGRSAILIGGEPGIGKSTLLLEASAKLGA KGKALYISGEES  
AAQIRLRAERIGALSQIEIFCGNDLHACLSVMDSVHPLLTVVDSIQTIHSPEAGAVPGT  
PNQIKFCTQELVEWAKSHDSIVVLVAHVTKDGMIA GPKAAEHLVDAVISFEQAENALRVL



RTSKNRFSSDELGFFLMGGEGLAELPDPSGIFMVRREGHLPAGIAVAIVHEGSRILLAE  
VQALTIPSKSGIMRVYSRIDPLRVSRIAAVLEKQTRLDFSSQEIVNVAGGLRLTEPAV  
DLPLACALYSARTGQALPLGSAIAGELSLAGEVRPVRSMDRRAKSASQLGFERIIGPGVL  
LPGEGLSKGTLSDQAARAAQHASQSFRWTRASSLKDTLRLWNQENRT\*  
>SPBIB\_v1\_310028|ID:27163803| putative 4-alpha-glucanotransferase (Amylomaltase) [Uncultured spirochete bib]  
MKCIHNNERISGLVVPLLSLRKNKSAACGVFSDLTELAKLAKQWGLSLIQLLPLNDTGNG  
TSPYSALSAFALHPIYISLPEVPKTMESLGAPLAQSAIDILKKAENKLARAHAGNKRVAF  
EAVLSDKLAALRSVWNESEQEYCRPLAELFAAQETWAKSYACFMALKEKYGLAPWWEWPEY  
RDVPTDIETLWDSSETGEEARFRLWLQILAREQLKDAAHSVAGMSIDIMGDIPILLAKD  
SADVWCDRDIFILNSQAGAPDMYSPRGQNWGFPLYNWDALKAGDYAFWRQRLAYADQFY  
TSYRIDHVLGFFRIWAISAFESEAFLEGEFEPSERLARSELSALGFSDERITWLSKPHIPE  
WKIQNMEARCIDAFNRAEGAPHVVSQAGDTKASADRRISLVQRLDHLRQVCFSRIKNEPLF  
LFSAQIRGSADINSKVAALKGDFPQAASALSDYAQSMCEWWTDRALYEVEPDRFVFTWEY  
HNTTSWKSLSMQEQEALQKAAELASKSLAEWEARGRELLSMLVASTGMQPFAEDLGAVP  
PCVPKVLKELKIPGLRVLRWEREWKPGQPYIQLETYESLSVACTSVHDSSSMRQWWEIE  
ADRAQLWAMFKMAEKDALLSSLLANCSQEAPALEPSAAAVLVRALVLSASNVVYPLQ  
DILACHPEWREPDARDERINVPGTTLPSNWSYRVRENLRTLASDKDFAAFVSRIAVRGAS  
K\*

>SPBIB\_v1\_310029|ID:27163804| Nucleoside recognition domain protein [Uncultured spirochete bib]  
VNFLKDELRRRIAGKSLKRTIDTSWFLIKIMVPVSLLVTLGWSGLLAKIAVVRPLMRL  
GLPGEAALVYISGALLNNYSSIAVMSSMNLSLRDATILAVMCLISHNLLVETAVMKSIGS  
SALKMALLRIGTAMVGGFLLNLILPASFAQIQLFSASATANSFAWPTMASWALSTLKLTA  
RIIVYILALMFAQTLLEQFNLMEWLSKWLGWLMRLFGLEPSMGFMWIVINIVGYAYGAGI  
IKAARDEGRMTLQEGDLFNHHAISHSLEDTVLYAAISIPVLWLIVPRLALAVVVVWGE  
RLRRYLFRRSLKAGVV\*

>SPBIB\_v1\_310030|ID:27163805| conserved protein of unknown function [Uncultured spirochete bib]  
MNILLDTHYLLWAFLDTRIEKRLMDIILAEDNEIFYSQASLWEISIKYNLGKLVFEGIS  
PEDLYREIENSFLRCRTFTNDELISFYRLPIEHRDPDRILVWQAITSYFFLSSDGKAD  
AYTKYGLKILH\*

>SPBIB\_v1\_310031|ID:27163806| conserved protein of unknown function [Uncultured spirochete bib]  
VGGGARAGMINVQLDHYVLIRYTTIMKTFQVAEIRAQFSSVLKEVEAGSEIGITFGKKKE  
TIAVIVPIEQYKKMKERKLTLEGKAKIRISEDWTISDEELLNS\*

>SPBIB\_v1\_310032|ID:27163807| putative Cytochrome c biogenesis protein transmembrane region [Uncultured  
spirochete bib]  
MNQPDLIAAFAAGLVSFISPCVPLLPAYLSLLSGLTIKELSGQQKRAKLLTASLMFSAG  
FTLAFTLLGIIFSGGMSFAGAGASRLFGQIAGIIVIVLGFNIMFDFIRILNNDARLIQKF  
AGKGRGQVNSFLMGLAFAAGWSPCIGPILASILLMAARNANIAAAALLVAYSAGFAIPF  
IASALFFERLSPLLGFLKKHGNGVRIVSGLLVAFGIVMVLGVSRSISALAAQAGIVLLS  
FDASSPFFSRLIGAAVWLLFAALSFRVILNRRRTHLQEEAIAPDQTQPASPQTTANSYST  
RRPTLPWLLSALFFVLAILEIAGAIGLVRIIGGWLTFTGI\*

>SPBIB\_v1\_310033|ID:27163808| conserved exported protein of unknown function [Uncultured spirochete bib]  
MAHSQNRPLSSRLIFQSSSFILLSLIIVLSSAQPAAAAETRPWYASGLEALGFYVFDQPF  
EQPNFSVAAINGSLKSRLSTKGNITLLNFWATWCPPCKQEIPITIKLHETMKGEKFEIMA  
IDLGEPPASVKTFLQNKITYPVYVDPKNSLAALYASRGIPTTYILDKNGKFIAGIIGAF  
EYDNPEFVRIMKELARK\*

>SPBIB\_v1\_310034|ID:27163809|clpP| ATP-dependent Clp protease proteolytic subunit 2 [Uncultured spirochete bib]  
MKLAEPQTTETEAKRPEEPLSERFLKTRTVLLVGEVDKDLSEKVVQRLLLLDSMSEEPIT  
LLIDSPGGDVYAGSFIDVIRFIKAPVRIVGIGLVASAAALILLAVPKERRFGLPNSSYL  
IHQPLSGMNGVATEIEIHARELEKTRARINEIIAEATGQQLEKITKDTDRDFWMNAPEAM  
QYGLIGKVIASRNELI\*

>SPBIB\_v1\_310035|ID:27163810| putative Endonuclease/exonuclease/phosphatase [Uncultured spirochete bib]  
VRPAFLFFAAIAMLVISCRCSLGSVDQAQEIRIVSYNVHNLFDAAEESGNEYPEFKPSKGG  
WTKELYAKRLASVIEAVRSLGKGDGSAQARDPILCVQEIENEKVLADLAEHFRKGA  
RYWAISGPKDSIIHTGVLRSFPVTAMHTHSVMDAWGFGPLRDILEVELDTSGATSDADRI

LLLICHWWSKREGEQETESARRAAAALLAQRIREIESEKPDLPPIVCGDFNESPDEYLRI  
SRRYPTALMPLESGSPPAAAEGEPLWVSQSFLQPGSSPDDASRVALYSPWAEKPDGFSI  
AYRDKREQFDGFLNNAALQDGFGLYEGFCTSESPVLFDAASGKPFWEWNGTSGYSDHLPVC  
LVLQKNAGQARVRY\*

>SPBIB\_v1\_310036|ID:27163811| Gluconate transporter [Uncultured spirochete bib]  
MVSGVVALLLLLLAVILIIITGTRYKMNAFLVLIGVSFVFGLLIGLKPLDVIAGIKNGFG  
GTLTNIGIVIVAGTIMGTILEKTGAALSMTQAILKLVGKSRAPLAMNVAGYIVSIPVFCD  
SGYVILNPLNKALAKESGISMVMAVALSTGLYATHTMVPPTPGPIAAASALGADLGKVI  
LLGLIAIPASLAGLLWATKFAKRYEIEPEIHETYSEIVKKFGKLPGTFLSFLPIVLP  
LILLSVAEFPSKPFNGGFRIFLSFIGDPVTALIGVLVSLLLVQKGELKNAISGWMGE  
GIKESAILVITGAGGAFGQIIKASPITEFIKTNMAGMQLGIFLPIISAALKTAQGSST  
VAIVTTAGIMAPLLQTLGLDPALTTIAIGAGSMVVSHANDSYFWVVSQFSGMPVNIAYKA  
YTSATAIEGAVAFIAILILSLFVH\*

>SPBIB\_v1\_310037|ID:27163812| putative Tetratricopeptide TPR\_1 repeat-containing protein [Uncultured spirochete bib]

MNKLYATLCERFGLNAYIAGDYAKAERWFRKLEQSEPNSIRVLRNLGVILLAQGRSEAE  
RYLLKEEKLYGSSFYRHSALADLAYATGKRKEAERRYKALQEPECAEGGKAFHMRLME  
KRLAICEDEKRFATRAMELFAEDLREAGAHEDAVAMFLKSFELDETNPALNNAAS  
ILFNKQSKPEEAKPLFEKAFELSHSIQVARNLELCQQSLNRTKKRNS\*

>SPBIB\_v1\_310038|ID:27163813|ttuD| putative hydroxypyruvate reductase [Uncultured spirochete bib]

MMNTKTMLNLRQDAEAFRAAVERVRPERLFSYSLSLDGSKLVVGDGQAVRGYDLDKYER  
IVLAAFVKASIPMAASLAALLGERVSQGLVITKAPEGGQPLAFDPETRTLFTERSIHIE  
AGHPVPDQRSMLAGKEMALASQVREWEKRGSHLVCVLISGGGSALLSSPAEGLTLEDK  
AAVTRLLLACGATIHEINAVRKHLSAIKGGLLARALFPAETLALVLSVMDGDDLDIASG  
PTVPDTSTWQDVKAIFDRYGLFDALPESVVIIEEGCEGERPDTPKPGDPIFRACSTILV  
GTNFHAIIEAERKSKDLGYHTLVIGTRLSGEAREIAKVFSGAVQDILLHKIPVATPACII  
AGGETTVTIRGHGKGGRNQEMALSFEELAHYPSALRGQLDRIAFLSAGTDGNDGPTDAA  
GAFADAAVIERAKAHALNPAHYLAENDSYTFFDKAGALFKTGPTGTNVCDIQILIVK\*

>SPBIB\_v1\_310039|ID:27163814| conserved protein of unknown function [Uncultured spirochete bib]

MKSDSQLKLAVIDADNTQPAIIDGLLAEIAKYGIASVKRIYGDWTNPNLRGWKERLLEY  
AIQPVQQFAYTTGKNSTDSAMIIDAMDLLYTENLDGFCIVSSDSDFTRLAARLREDGKLV  
LGFQQRKTPKPFVAACDKFIYTEILQENVGETDEERESHDPKDAASKRAAAQPDIKDDKK  
LKALLSAAEEAADEFGWAYLGEVGTYIANRLPEFDPRNYGFRKLGELIKATNLFEIDER  
TNPMVPGKQVYLRKHRGRS\*

>SPBIB\_v1\_310040|ID:27163815| conserved protein of unknown function [Uncultured spirochete bib]

MTDTQFARFCDVREKIRLYISSISENAQWILEAQRVYNARGYYEADLETPVVYNLALED  
ITAKSEPRFIIIVADNPGIQEQKAKNHRYLVGQSGKLAVSWFRENLGIDFRSSTLIINKTP  
IHTPKTAELRLLVRAAGSRSDDELADLLVDSQREMARFAFDLLEILECPLWVSGIGELRPK  
GIFRPWAEELRALCLGAPFELRERVWLFRRHFSMNQFAIEYANARRAMMVDPKAQNTQKA  
SRVNPNGVSDPGATYAMLAEIGRKNRTTILGF\*

>SPBIB\_v1\_310041|ID:27163816| conserved exported protein of unknown function [Uncultured spirochete bib]

MRVFSLIATTLAAAFVSSSACAAQKNDTL SRLPADIRAEAQAALSAVRLGDEDRSRIA  
AAINQAPSEFASLFHEVRAVMNADPNLLRRVDKTVLALPASFIPGDLVSLDGAFPYAVSKK  
GMMLRKPAREALARMAEAARKDGITLVSSAYRSYEQKTVFERNVKEMGKIEAERVSAP  
PGMSQHQLGTAIDFGSITDAFAETAASKWLAHAHASTFGFSLSPKNMEEVTGYRWESWHY  
RYISPAQAQMQRFFLGVQQYLIEFLSGV\*

>SPBIB\_v1\_310042|ID:27163817| Cof-like hydrolase [Uncultured spirochete bib]

MNRNKPAAPIKLIALLDLDLTLRADLTISEQNKQALQRAENLGIHIVLASGRNYHSMRRY  
AEELFIHRRGDYLISSNGAQLIRASSGRLIEDLKLAAFCKEVASDLERKGYLWQLYIGG  
KIYCNRMNKWAIMDQEFTGQPLEVIRDFDITLSEDQTKILVCGEPEQIEALYQGLVNRIG  
DRAEIVTSKPYFLEILPKGATKGAALERLTARLGLDMESVLAIGDARNDYDMIFKAGWGC  
APANADEIRAIARFVSARTNEEDA VADILEWGLTPFLKI\*

>SPBIB\_v1\_310043|ID:27163818|murJ| Protein MurJ homolog [Uncultured spirochete bib]

MAPQENHENSAAARASTPETAASPTPTLESDAASAKMVRSAAGMLSVLTMISRVLGLIREM

TKARFLGTGIYSDAFTVFSFIIPNFTRRLFAEGSITVAFIPTYKGYLHAQNDEETRTFLSA  
SLTVLTICVTA AVALGIALAPWIVKLFVSEPVETALLTRIMFPFLALVSFAALLQGILNS  
HEIFNPSGLAPILFNICFIVVPWL VGSRLGNPARAMAVGVVIGGLAQALVQLPAVLRLLGI  
RFGFMNPARAFLNPGMRKV FALIAPTILGMAAYQVNDLVSTAFASRAGTGVASSLQYSLR  
LQELILGIFAVSAGTVLLPRLADAVREHAWRDYSSTLGRMTMSLLLLTVPVAVFMSMAFPE  
RIVTLLFKSGDFTDVS VRLTASAFFWHQTGLVFIAMNRLIAPAFYARS DTKTPTWAGIAS  
FGVNVVLVLALAFRFQGPFI AFALSFSSAMNTGLLVWALIKGNIEGVRHELWDALKYAIR  
MAIFSAVAVVPALFVDRAVYAKVADAH SRLISAGVPLVAGTVVFAAVGIALLVLTKDSVA  
ASITNAFSRKTRGRGR\*

>SPBIB\_v1\_310044|ID:27163819|rpmG| 50S ribosomal protein L33 [Uncultured spirochete bib]  
MASKKKQNVEIIALQCTECKRRNYTTKKNRKTQDKLELMKYCKWDRKHTLHRETKVK\*  
>SPBIB\_v1\_310045|ID:27163820|secE| Protein translocase subunit SecE [Uncultured spirochete bib]  
MKKIIQFFKDSY AELAKVVWPSKEDVIAS TKIVVISTVAVALVLGLIDFLVLGIEVVFR  
\*

>SPBIB\_v1\_310046|ID:27163821|nusG| transcription termination factor [Uncultured spirochete bib]  
MAKAWYILHVYSGYENKIEKTIRMLIDSGELSRDIVTDVKVPAEEVAEIKDGK KRTVSRK  
ILPGYILVEMDLPENGWKATCAIIRNITGVTGFVGSASNVPVITMEEVKRILQRTGEL  
KGERQVHFRQTFTVGEQVKIIEGPFESFSGVIDEVNAEKSKIKVSVQIFGRSTPVEVDMA  
QVEKM\*

>SPBIB\_v1\_310047|ID:27163822|rplK| 50S ribosomal protein L11 [Uncultured spirochete bib]  
MAKKKITAIVKLQCPAGKATPAPPVGPALGPHGVSAPMFCQQFNDRTKNMEPGLVIPAI  
TIYQDKSFTFILKTPPASVLIKKACGIEKGSALPQKDKVAKLSKAKLEEIAKLLPLDNA  
NDLEAAKRIIAGTARAMGVEVEW\*

>SPBIB\_v1\_310048|ID:27163823|rplA| 50S ribosomal subunit protein L1 [Uncultured spirochete bib]  
MKHGKKYNEVAKKVDPSQAYELGAACALVKELKTAKFDETVEVHIRLNLKKSQSVRDTV  
LPHQFRGEKRILVFCRPERVKEALEAGATYAGDAELIEKIKGGWLD FDI AVATPDMMKDV  
GKLG MILGRRGLMPNPKTGTVTNDLPASLNELRKGRTEYRTDKSGIHL PVGKVSMEPEK  
IAENLNTLVEEISRKR PADAKGDFIASIYLTPTMGPSVKVVLNKSEKR\*

>SPBIB\_v1\_310049|ID:27163824|rplJ| 50S ribosomal protein L10 [Uncultured spirochete bib]  
MAIKASKLQPRKIEAIGMLKEMISSNDFIFTEYRGLTVEQITSLRRQLREKGV ELHVVK  
NNFARLAFEELGFSQDVAPVLTGPTAVAFVK TDSNEVAKVLLDFAKETPALVIK GAMVGR  
QFMDSHQVEALS KLPGRNQLIAMLMSAMQGPAQNLVYVINA IPTKLVRVLKAIEEKKAQE  
NA\*

>SPBIB\_v1\_310050|ID:27163825|rplL| 50S ribosomal subunit protein L7/L12 [Uncultured spirochete bib]  
MAALTKEQIIDAIASMTVLEVSELVKAMEEKFGV TAAAPVAVAAAPAAGAAAAPVEEKTE  
FTVVLKGNVPADKKIAIIEVRAITGLGLKEAKDLVEAGDKPLKENVSKEEA EKVKKQIE  
AAGGQVEVK\*

>SPBIB\_v1\_310051|ID:27163826|rpoB| DNA-directed RNA polymerase subunit beta [Uncultured spirochete bib]  
MAYTEQKIKRIYIGKDYRDVMDIPDLIDIQVSSYERFLQRDKLRKGEPLDLIGLEEVFRG  
TFPIESPSGDLVIEYEHYSLDEKAIKYSELECKQKGLTYSVPLKAVINLVFKKTGEIRQK  
EIYLGDIPLMTDRGTFIINGAERVIVSQIHRSPGVVFSHEKGVFSARIIPYRGSWLEFEI  
DQKHDLIAKIDRKRKILGTLFLRAIGIQTREDIIAFYTTKQVELSENQTEKDALVGKI  
LAKAVYIELDGEEKR LFRAGDKIHLHEIDELINLGIGSVEVINFDDEKSLHNEMILNCFE  
REDVKLVKETPDQDEPTKEDAISAVYSVLRPGEPISLENAERDLHNMFFTARQYDLG SVG  
RYKLNKKFDFDKTLTLTKDDIVATMKHLINVYYGEANVDDIDLGNRRVRAV GELMSNV  
MKVAFSRMERTAKDRMTGKDLETAKPQDLITIKPIVAAIKEFFGTSQLSQFMDQVNPLAE  
LTHKRRNLALGPGGLNRDRAGFEVRDVHYTHYGRMCPIETPEGPNIGLIVSLATYTTVND  
YGFLETPYRKVVKGKVTDEIEYLSAIDEDKYYIAQASARIDTAGKFLDQSI SCRHQGDYT  
MRRPDEIQYMDVSPKQIISVSAALIPFLEHDDANRALMGSNMQRQAVPLVFTEPPRIGTG  
MEWKTA YDSGVLMAKARTGTVEFVDANRIVIRPDKMESPD DTDVYQLIKYQRTNQDTCFN  
HRPIVKRGEHVLKGQVIADGPATSQGELALGRNILAGFVPWNGYNYEDAILISERVVKED  
LFTSIHIKEFILEVRD TKLGP ERITRDIPNTSEKMLDNL DGEVVVRIGAKVKS GDILVGK  
VTPKSDTDTTPEFKLLNSIFGEKAKDVRDSSLR VPHGIEGTVIDVQRMSRANND DLAPGV  
EETVKVLVAVKRKLKEGDKMAGR HGNKGVVARVLPVEDMPYLEDGTPLD ICLNPLGVPSR

MNIGQIMETELGWAASTLDEWYACHVFQSPSQEQIEEKLQQAGLPVSSKVMARDGKTGEY  
FKNPITVGVVYFLKLHHLVDDKM HARSTGPYSLVTQQPLGGKAQFGGQRLGEMEVWALEA  
YGAANTLQELLTIKSDDMTGRSKIYEAIVKGEPHTAAGIPEAFNVMVQELRGLALDIKVY  
DSKKGKQIPLTERDEDEDIKKQSGAF\*

>SPBIB\_v1\_310052|ID:27163827|rpoC| RNA polymerase, beta prime subunit [Uncultured spirochete bib]  
MRDIQDFDNISIH LASPEMIRAWSYGEVKKPETINYRTLPERDGLFCERIFGTTKEWEC  
YCGKFKSIRYKGVICDRCGVEVTNSKVR RERMGHIELASPVSHIWFYRSVPSRMGLLLNL  
PMATLKSVLYYEKYIVIDPGETELKMQLLTDEEYREAMDRYGGGAFTAGMGAEAIRSLE  
QIDLDKLSQELRQKMIERGAKADKRLKRIEIVEAFRSSGNRPEWMILTVIPVIPPELRP  
MVQLDGGRFATSDLNDLYRRVINRNNRLKLLQLNAPDIIYNEKRMLQEAVDALFDNTR  
RRRAVKGAGNRPLKSLADMLKKGKQGRFRQNLGKRV DYSGRSVIVVGPPELKMWQCGLPTK  
MALELFKPFIMKKLVEKD VVNIKKAKMLVESETPEVFAVLDEVVKEHPVLLNRAPTLHR  
LGIQAFEPILVEGKAIKLHPLVCKAYNADFDGDQMAVHVPLTHAAQAECWTLMLSSRNLL  
DPASGKTIVYPSQDMVLGINFLSRHRPGTKGEGKRYSSPEELLACEYGACDYQALVYVQ  
TPKEPVWDSYAKPATLNGSKLIKTSAGRILLNEALPKEIPYINYALTDKDIRSLIEYVYR  
TNGPFITVNMLDTIKEMGFKYATFFGATIGMDDIVIPKEKTEMIKANKEVEAIQQQYLA  
GHITQDERYNRVVEVWSKTNEELTAVMMKTKLEKDRDGFNNIYMMAHSGARGSKNQIRQLA  
GMRGLMAKPSGDIIELPIRSNFREGLSVIEFFISTNGARKGLADTALKTADAGYLTRRLV  
DIAQDVVVNDDDCGTINGAIHTAIKDGDEIIESLKERIIGRFTLDPIRHPITGEIIVGSN  
EEITEEIAEQIEAAGIEEVSVRTVLTCEAKHGVCRCYGRNLATGKTVDIGEAVGIIAAQ  
SIGQPGTQLTMRTFHIGGAATKAAEENRISLRYPAYVVDIEGTYVKTDLGHFLFTRRGYI  
YVNRVFGAFELSKGDVVLVEDGQRVMKDDPVIRKADGAEIKSPSISYAKVLEGKLLLIAQ  
EQKVEIRNGSEVVVTKGQILLANETIATFDPFNDPIISEHDGIARYEDIVPGSTLKEEIN  
AETGNVEKIITDVGSRD TKEPRILITDEAGNDIETYLPEGAYVNVEDGEPVKAGKILA  
KILKESAKAMDITGGLPRV GELFEARKPKTPAVLAMVSGTVSFGGSLK GKRVINIRDSFG  
KVYKHLVPKNRLLVRNGDKVAAGELLCDGSKNPHDILAILGEQACQRYLMDEVQQVYRA  
QGV TINDKHIGVIIRQMMKKVEIVNPGDTVFIY GQQIDKHKFH DENRRVEEEGGQPAVAR  
PILLGITRASLKIDSFFAAASFQETTRVLTDAAIKGEIDQLRGLKENVIIGHLIPAGTGM  
KQYRQVRLFDAVNDDLNSLVEEVLEKRKQERELAPPAILQDR TTNDVSFDEPSVFDNDEG  
FSEDVEPSE\*

>SPBIB\_v1\_310053|ID:27163828|rpsL| 30S ribosomal protein S12 [Uncultured spirochete bib]  
MPTINQLIRFGRKQNKQWTKSPALMGCPQRRGVCTRVMTVTPKKPNSALRKVARVRLTNG  
IEVTA YIPGIGHNLQEHS AVLVRGGRVKDLPGVRYHIIRG TKDALGVEDRKQGRSKYGA  
KPKA\*

>SPBIB\_v1\_310054|ID:27163829|rpsG| 30S ribosomal subunit protein S7 [Uncultured spirochete bib]  
MGRKKKSIDRGHAPDVKYNSTTVSRFICRMMWQGKKSICTSIMYDALELLQKSGQPALD  
AFNKALENVKPSIEVKSRRVGGATYQVPIEIRESRREALAMRWLINAARARTGKAMA ECL  
ADELFD AFNNTGTAIKKKDDMHKMAEANKAFAHYRW\*

>SPBIB\_v1\_310055|ID:27163830| putative Elongation factor G [Uncultured spirochete bib]  
MPTESQPRGWLFLFVQQKYTD PAMNMQAAPISIRNIGILAHIDAGKTSITERVLHVAGVR  
EKAGNVDEGTTATDYLTIERQHGITIKTAAVRFIHKGVRFHLLDTPGHVDFSAEVDRVLR  
VLDGAVIVLCAVSGVQVRTGF IASGCRAHKIPRMYFINKMDRRGADFFAAMQEIAGELGE  
SVLPLQVPTFEHQWNGIADLVNLRWFPAMLDMS ENIAQAGESPASLDSIGLPIDQAPIS  
EKSQRQIEQYREKILDRASMYDDRLTEMIVNGQQISP AHIRDALRPAIQRQDIMPALCGS  
SFSDISTALLLDAVIDYFPDPLERGCPPAKDLKNGSELN LPAAPDAPFSAYIFKSVLSQN  
LEPLGWLRIWSGTIREGMKVMAMPARKHVQIQRLYGVNGADVEHIESAAAGEIVGARLSF  
MEAGGT LCAANLQIIYESFKNPEPLVFMVIEPSSQAELPQLREALKHFSMEDVSLSVSEE  
KDTGRIT IAGQGELHLDIIRERL KKEYGLRVRAGNPQVPKIERL KKAARLADQFVGDFFG  
ERLAVGLGVFLENEKDNNANSLHVASGIRLSANYEACILRAMETVLA VGPCEGWPIVGTK  
VIVESFMPPGGAAGSTDKRSETAVEAAASSILRKA VNLAGTVVFVPIVQVSVEVPDDWFG  
SALASLQARGARIEAVEDTGGVKSIVAYAPMENLFGYATSLRSITEGRGVYQAKFDHYGS  
AREY\*

>SPBIB\_v1\_310056|ID:27163831|tufA| protein chain elongation factor EF-Tu (duplicate of tufB) [Uncultured spirochete bib]

MAKEKFERTKPHMNVGTIGHIDHGKTTLSAAITMYCGRKFGDKVLKYEDIDNAPEEKARG  
ITINTRHLEYQSNKRHYAHIDCPGHADYIKNMITGAAQMDGAILVVSAPDSVMPQTREHV  
LLARQVGVPAILVYLNKVDLVDDPELLDIVEEEVRDLLNFYGFPGDKTPIIRGSFAFKAMT  
EPDNPEATKSIQELLDAMDSFFPDPERAIDKPFMPLIEDVFSISGRGTVVVTGRVERGVIIH  
VNDPVEIVGIRPTKQTVVTGVEMFNKLLDEGQAGDNIGTLLRGIDKKEVERGQVLAKPGT  
ITPHTKFRGQIYCLSKEEGGRHSPFFSGYRPOFYFRTTDITGTVKLPEGKDMVMPGDNSE  
IEVELIYPIAMEKGLKFAIREGGHTVASGQVTEVIA\*

>SPBIB\_v1\_310057|ID:27163832| protein of unknown function [Uncultured spirochete bib]  
LLLLPAASGWLLDKQFSECYYSVPLKGGGTLLCEMVPRAH\*

>SPBIB\_v1\_310058|ID:27163833| rpsJ| 30S ribosomal subunit protein S10 [Uncultured spirochete bib]  
MKDRIRVRLRGFDVRLVDDSAKSIKTVQNAGSKVSGPVLPTRINKFTVLRSPHVHKKS  
REQFEMRTHKRLIDIIDPTPEVMDALMKLELPSGIDVEIKQ\*

>SPBIB\_v1\_310059|ID:27163834| rplC| 50S ribosomal subunit protein L3 [Uncultured spirochete bib]  
MIGVIGKKVGMTQIFDETGRVVPVTVVQVVPNVVVSKKTAEKDGYNVAVVGVYEEKKSRV  
TKPYAGQFPEGIAPTRILREFRDFEKEVDVQSIDASVLDGVRFVDVIAKSKGKGFQGVV  
KRWGFEGGRATHGSKFHREPGSTGNSTYPHHSFKNIKMPGHMGNERVTVQNLKVVVRVDAE  
KGVVLRGALPGPRNCDVLIRKSVKKS\*

>SPBIB\_v1\_310060|ID:27163835| rplD| 50S ribosomal protein L4 [Uncultured spirochete bib]  
MEGKVISLSGKELRTIELSDAVFGLPINEDVIWYAVNNELANARVGTASTKDRGEVHGTN  
RKPFQAQKGGGRSRHGDLKSNIYVGGGISFGPKPRDYSYAIPRKAKQLSLKTILSLKIQDG  
LVSIIEDFTVESGKTKDLLKVLNVVDLKNPARTVLILKDDDDPMIKRAARNIPWLSYLT  
NRLRAHDLFYARKVVMLEGASAKLNEFYASETKE\*

>SPBIB\_v1\_310061|ID:27163836| rplW| 50S ribosomal protein L23 [Uncultured spirochete bib]  
MEYDAILIEPVLSEKSNIMREIGQYIFKVDARATKPMIMEAVAKTFNVHPVSCKVINVTS  
KPKRLRGRPGRTAEWKKAIVRLQKGETIRVFEGA\*

>SPBIB\_v1\_310062|ID:27163837| rplB| 50S ribosomal subunit protein L2 [Uncultured spirochete bib]  
MAIRTFRPVTPGLRHRVQVINEEITSNESKPVKSLTKGKRSTGGRASNGRISVRHHGGGH  
KRKYRIIDFKRDKFGVPGKVSGIEYDPNRSANIALITYADGEKRYILSPKGLKVGQIILS  
GPEAPAEVGNALPLDKIPVGFTVHNVELTLGRGGQLARSAGVSALIAAKEGDYVVLKLP  
GEQRMVFKKCIATVGQVGNEEHMNERIGKAGRTRWLGIRPTVRGTMNPDVHPHGGGEGK  
GKGYKQPVSPWGQPAKGYKTRDTHKPSGRFIVKRRK\*

>SPBIB\_v1\_310063|ID:27163838| rpsS| 30S ribosomal subunit protein S19 [Uncultured spirochete bib]  
VRSVKKKGPFIKSLYKKVTEMSRAGDKKLIKTYSRSTIIPEMVGGTISVYNGKTWIPV  
YVTENLVGHKLGEFAATRVRFRGHAGSDKKAEEK\*

>SPBIB\_v1\_310064|ID:27163839| rplV| 50S ribosomal subunit protein L22 [Uncultured spirochete bib]  
MANTKTGYRATSKWLIASPFKVRPVADLVRAKPYTEAMAVLENMPHKGAKLIRKVVASAA  
ANALNKNRKLGEDMLYIKELRIDEGRPMKRIWFRARGRADMQLRRMCHISCVVDEIGKKT  
EA\*

>SPBIB\_v1\_310065|ID:27163840| rpsC| 30S ribosomal subunit protein S3 [Uncultured spirochete bib]  
VGQKVNPIGLRIGINKDWSHWYVEPREYAKTLHEDLAIRRRLELPETKGADISEIEII  
RHPQRITIVIHSARPGVLIGIKGANIDKIGAEIQKITQKKLQIKIKEIKKVDNAQLVSQ  
NIARQLENRQSFRRSMKSAIQNALKAGAQQCKVRLSGRLGGSDMSRTEELKEGRIPLHTL  
RADIDYGFSEANTTFGKIGVKVWIYQGMVYAQDKNEDAGQLARKAKREPAGEARGERREG  
SQERRDRRERGERSERGERKPSAKPDADRAEGEARS\*

>SPBIB\_v1\_310066|ID:27163841| rplP| 50S ribosomal subunit protein L16 [Uncultured spirochete bib]  
MLIPKRVKHRKQQRGRIHGEAHSNTIAFGDYGLVCLEPHWITNRQIEAARIALNRYIKR  
GGKMWIRIFDPKPYSKPAETRMGRGKPGPEYVAVVKPGTVLFEVSGVEPKAAEEAMRL  
AGSKLPVKTFAVREEME\*

>SPBIB\_v1\_310067|ID:27163842| protein of unknown function [Uncultured spirochete bib]  
MRFVVFVVGFNTRLRLVHILSVERMQLAHDNFYDNGLIHLVGNLQNLALSHFLDVRI  
HVPSPEELFLLRDAALGFGDPGFDPRDLAAKISLLERILYVPDHHLESKVKVFLSKLIA  
LDEHLFHLQIFE\*

>SPBIB\_v1\_310068|ID:27163843| rpsQ| 30S ribosomal subunit protein S17 [Uncultured spirochete bib]  
VDTNIQKMTEGKLVLQGIVVSDKMDKTIVVEIIMRKLHPLYRKYVNKTKRVKAHDENNEA

HVGDTVSVVECRPLSRDKRWRLVEIVERAK\*

>SPBIB\_v1\_310069|ID:27163844|rpIN| 50S ribosomal protein L14 [Uncultured spirochete bib]  
MIQVESMLNVADNSGAKTVQCIKVLGGTRRRYASVGDIIVVAVKSALPNSAIKKKGSVEKA  
VVVRTHKEYKRPDGTYIRFDDNACVIIDANKNPKGKRIFGPVARELREKDYMKIISLAPE  
VL\*

>SPBIB\_v1\_310070|ID:27163845|rpIX| 50S ribosomal subunit protein L24 [Uncultured spirochete bib]  
MANAKYKLRKEDLVQVIAGKDKGKQGKILKIDHEKGRVIIAGINMVKKAMKKKSQTDRGG  
IVEVEAPLHISNMIICKKCNKPVIRIGYKFEGEIKKRVCRKCGEVL\*

>SPBIB\_v1\_310071|ID:27163846|rpIE| 50S ribosomal subunit protein L5 [Uncultured spirochete bib]  
MAEAKVYIPRLKKLYREKVAPELFTELGYTSKMQVPRLVKVIVSMGVGEARENKLLDAA  
VGDIEITGQHAVKTKAKKSIANFKIRKQGIEIGARVTLRGNQMWEFLDRLMNVALPRVKD  
FRGVNPNNGFDGHGNYTLGLTEQIIFPEIDFDKIEKVMGLSVSIVTTAETDTEAKSLLAKL  
GMPFRR\*

>SPBIB\_v1\_310072|ID:27163847|rpsH| 30S ribosomal subunit protein S8 [Uncultured spirochete bib]  
MSVSDPIADMLTKIRNANAARHEKVDIPTSKLLEIVKILKTEGYIKNFKKIQADGQNF  
RIFLKYDEENNPPIHGLSKVSKPGRRVYTYGEMPRILNGYIGIMVISTSDGVITGRKAVE  
KQVGGELICTVW\*

>SPBIB\_v1\_310073|ID:27163848|rpIF| 50S ribosomal protein L6 [Uncultured spirochete bib]  
MSRIGMRPVAIPQGVKVTVEPTVFHVEGPKGRLSQEYRPDVAIAVKNGEAVVERKNDSKQ  
AKAYHGLYRSLNSMVTGVSQGFKRALVINGVGYRAEVQGNFLVLSIGYSTDVVAVIPDG  
LKVSVEQNGQKVVIEGIDLAKVGKFASEVRSLEPEPYKGGKIRYEEEKIRRKVGTGTVK  
\*

>SPBIB\_v1\_310074|ID:27163849|rpIR| 50S ribosomal protein L18 [Uncultured spirochete bib]  
MSVRELSDKIRKDRRRTHVRKTIVGTAEKPRMTVFRSNLHLYVQVIDDTLGHTLASVST  
MEQQFRSLRATVQTGGVLGEEIGKRLLLEKGITQVVFDRNGYKYHGIVKAIADGARKAGIK  
F\*

>SPBIB\_v1\_310075|ID:27163850|rpsE| 30S ribosomal subunit protein S5 [Uncultured spirochete bib]  
VERTRRDDSGVQDGYTEKLIQLNRTAKVVKGGRRFSFSALTVVGDQKQGHVGFVGFKANDV  
TEAIRKSVRAKRAMVTPVKHGTLPHEVTGLYKATTVYMKPACPGSGVIAGGPVRAILE  
CAGYTDIISKCVGSRTSVNVVRAVFLGLDQLLDAQTIKNRGKTLKDMWS\*

>SPBIB\_v1\_310076|ID:27163851|rpmD| 50S ribosomal subunit protein L30 [Uncultured spirochete bib]  
MARIQITLVRSTIGQKPNARATVRCLGLRKIGSSTIQEASPOILGMVNRVRHLVETKEVE  
\*

>SPBIB\_v1\_310077|ID:27163852|rpIO| 50S ribosomal subunit protein L15 [Uncultured spirochete bib]  
MTDFNLHAPEGAKKRKHIVGRGDGSGWGGTAGRGNKGQQRSGGKTYPGFEGGQMPLYRR  
LPHRGFSNYPFRKEYQIVNIRDLEGKFQAGDTVDTVSLFMKGLVRKPELPVKLLGEGQIE  
IALTISVDAVSSSAKTKIEAAGGKVEVPAATGSSADA\*

>SPBIB\_v1\_310078|ID:27163853|secY| preprotein translocase membrane subunit [Uncultured spirochete bib]  
MAGTLVDIFRVKELKDRIFFTLFWLAIFRLGAFLPIPGINASALQSYFANQANTGGGIDT  
YLDFFAGGAFKNFSLFMMGVMPYISAQIIMQLLLVIFPKLKNIAEEEEGRRKISRWTRIG  
TIGIAIQSFSVTVWADRIPNAIAMSNTMYTIVAITVTTGTMFLVWIGEQITKRGIGN  
GISLLIFAGIVARLPNATYELIKKIQLGEINAVYAIVVLIMFVAVVALVVLEQQGQRKIP  
VNYAKRIVGRRMYGAQNTYIPFKINPSGVIPVIFASSLLTFPLQIAQSFGVQAKWLRDFS  
YWLRPSTGFWYNFFYVVFIIFFAYFYTQVTLNPQEISKNIRENGGSIPGIRSEKMEEYLTR  
VLNRIILPGSLYLGLIALIPTLVQRLFNFPQMA YLLGGTSLILVGVDLDTMAQVEALL  
KMHHDGLVRKGHIRSRNL\*

>SPBIB\_v1\_310079|ID:27163854|rpsM| 30S ribosomal subunit protein S13 [Uncultured spirochete bib]  
MARIAGVDLPNKHVDIALTYIYGIGRTSAIKICEATGIDPAKRINDLSNEEINELRKVIE  
NEYKVEGRLRTEIALNIKRLMDIGCYRGLRHRKGLPVRGQRTRTNARTRKGKRKTVANKK  
KAV\*

>SPBIB\_v1\_310080|ID:27163855|rpsK| 30S ribosomal subunit protein S11 [Uncultured spirochete bib]  
MNVAATTTKTKKRKEKKSVEYEGNVYIQATFNNTIVTVDLNGNAISWSSSGSHEFRGAKK  
STPFAAQTVTEAAAQKAIQAGLREVHVVFVKGPGIGRESAIRQLGVMGLKVKSINDVTPIP  
HNGCRPRKARRI\*

>SPBIB\_v1\_310081|ID:27163856|rpsD| 30S ribosomal subunit protein S4 [Uncultured spirochete bib]  
MARYIGPVCRLCRAEGRKFLKGDRCRSDKCPINKKRLPPGKAPKTRLGKKSEYAVQLRE  
KQALKRNYGLMEQQFRNTFEKALGLPGKTGDNLILLERRLDNVVYRLRFASSRAQARQL  
VNHGHIAVNGKRVNIASYLVRAGDVISVIGAAKKMESIRQALEEVQKSGVMPWLEVNADE  
MTGRFVTNPQRQDVTDIADIKEQLVVELYSK\*

>SPBIB\_v1\_310082|ID:27163857|rpoA| DNA-directed RNA polymerase subunit alpha [Uncultured spirochete bib]  
MARKNLLKGFKKPKGITYEQSESTDTYGKFVAYPFEPGYGTTVGNTLRRILLSSIQGYAI  
TAVRITRYDDEGVPHVITSEFETIPGVVEDTIEVLNLLKLRVKLPNDKEELTLEYEIKG  
MEELRGSFFADQSSLIVLNPELKIASLDPSVHLGLELQVNLGRGYVPSEVNEKFIDVVG  
IPMDAIFTVPKKVKYSIEPTRVGQRSDYDKLVLEIWTGDTIKPEDALGEAGKIAKDHFSI  
FINFDENEAGGEETSDEIEERVRQILNMPVEEELS VRSFNCLKNANIRTIGDLTKKTEE  
EITKTRNFGKKSLEIKTKLAEWNLSLGMADYSALRNHIKLNMKKEESDEA\*

>SPBIB\_v1\_310083|ID:27163858|rpLQ| 50S ribosomal subunit protein L17 [Uncultured spirochete bib]  
MKHKIGYNKLNRAAHRKALIRNMVTVLFKQEKIVTTKAKALEARRAAEKLITRAKEDSV  
HNRRIASARLYGEDAVAKLFTDIGPRFKERNNGGYTRILKLGNRANDNASLVVLELVGQKA  
DEKKAEREKRKAERKTKKQA\*

>SPBIB\_v1\_310084|ID:27163859|livF| leucine/isoleucine/valine transporter subunit ; ATP-binding component of ABC superfamily [Uncultured spirochete bib]

MLKVTNLKVNYGKIEAIKDVSEFVDPDGKIVTLIGANGAGKTTTLRAISGLERAAGGSIVF  
EGKDITNLEAHKIVPLGISHVPEGRKIFPTLTVKENLELAGWTIKDKTEVNRIDQVCEI  
FPRIKERLSQLGGTSLSGGEQQMLAVGRALVTGGKLLLLDEPSMGLAPVLVDEIFDRIVAI  
NKQGTTVLLVEQNAMEALEIADFAYILEVGYTTISGEAKAIEHDQRVREAYLGV\*

>SPBIB\_v1\_310085|ID:27163860|livG| leucine/isoleucine/valine transporter subunit ; ATP-binding component of ABC superfamily [Uncultured spirochete bib]

MTPLLKIEHLTHFFGGLRAVYDFNFEIPEGSYGLIGPNGSGKTTIFNLITGIYDPTEGA  
INFQGENIKGMKSFRIVHKGIARTFQNLRFGNLSAIDNRIARHYTTTSSLFASILRLP  
SFKSEERAVKREALELLDLMHLSNRAMETAKNLPYGELRRLEIARALATKPKLILLDEPA  
AGMNPKEVDDLMRLISRIRDEFKVTVFLIEHHMQVIMGICEWIKVIDFGETIAEGLPDKV  
KNDPRVLEAYLGKRG\*

>SPBIB\_v1\_310086|ID:27163861| Branched-chain amino acid ABC transporter permease protein [Uncultured spirochete bib]

MNVRKLPRFLIAVVLFYIVVEVLYRTEILNGYLLHIINLSLIYVILATSLNLINGITGQF  
SLGHMGFAAVGAYVSGSLTTLILKLSVTDPASMLPFILSIIAGGVVAAFVGFGLIGFPSLR  
LKG DYLAIVTLGFGEIIRTIFNNIDAVGGPRGLLGIPKFSNFTVILVATFLT VVIIRNLI  
ESSHGRAMLSIRENELAAELVGINTTRYKVMMAFTFGAFFAGIAGLLAHLIQLAHPTQFG  
FIKSVEVLIMYAGGVGSLTGSILAAFGLTFLSEGLRLGIRALADATGLPIGGEW RMVVY  
ALLIFIMLFRNEGLMGMRESRIK NVEVD\*

>SPBIB\_v1\_310087|ID:27163862|livH| leucine/isoleucine/valine transporter subunit ; membrane component of ABC superfamily [Uncultured spirochete bib]

MGSIFSLQQILNGLQLGSIYALIALGYTMVYGVRLINFAHGDFMIGAYAAYGSFYLFN  
ALVAGRSGTLAFLVLLAAMIGGASIA YLTNKFA YKPLRYKPKLSSLITAIGVSMFIEYFF  
SALPAIGPSYRSFPDIIVRKEIRLGN AVISNLVIIDLAVAAILMVGLTLLVRKTTLGKAM  
RAVSQDKDAARLMGIDIEKVISFTFMVGGAFAGAAGLLAGMTYPRIFPYMGILPGLKAFI  
AAVLGGIGNIPGAMLGAYIMGIAETFASAYNSLIGEGIAFAILILVLLIRPRGLLGEKIA  
DKI\*

>SPBIB\_v1\_310088|ID:27163863| Branched-chain amino acid ABC transporter substrate-binding protein [Uncultured spirochete bib]

MKKVLFVMALVVLVAASYAQDIKIGGIGPVTGEAATFGISTKNGMTMAVDEWNAKGGIFG  
GRKAKLIFEDDKGDPSEGAI VWNKLIQQDNVVAIVGTVM SKVSLVGAPISQAAGIPMISP  
TSTNEKVTLVGDYIFRACFIDPFQGT VGANFAYNDLKARSAAAIFDLGNDYTKGLAENFK  
KQFEKLGKIVAFEGHPTGTTDFKAQLTKILQGKPDVIYIPDYNDVGLIAKQARELGFK  
GPLVGGDGWDSPELVKIGGTA VENGFFTNHYSSDKRAIVQDFVKKYKAKFGAEPDALAA  
LGYDAMYIMLDAIKRAGSTKGAAIRDALKATDINVVSGRIKFDENRNPIKSAVIIIEIKNG  
KQVYRTTVNP\*

>SPBIB\_v1\_310089|ID:27163864|rarD| Protein RarD [Uncultured spirochete bib]  
MAQEKAQTSMEHETRTGRFSQKQGLFAAIGAYGLWGIPLYWKLLSSVPLQLAHRILW  
AAVFCLMLLLARKEMSSLGVALKDPRKRVLVGAAGLLVTNWNWGMYYIYAVNSGHVLETALG  
YYINPLLSVALGAMLFREHIDRWTRIAVGIALVGIVAAGILYGQVPWISLILAITFALYG  
AVKKGLGLAPITSLALETFSVAPLAFALAVMHAQGAGSFGNAGLRVTALLALSQVVTAV  
PLLLFGVA AISISLQLIGFIQYLTPSQQLLGLFLYKEKPNAAVVA AFVAVLVAVVIFAV  
TRFKKGEPA\*

>SPBIB\_v1\_310090|ID:27163865|hutI| Imidazolonepropionase [Uncultured spirochete bib]  
MAENRQKALFVHNIGELWTAEGLRAAAGPAMGRVKKFRDTCLYIEDGRISAIGEEARLRA  
AATAAPTFAEGRACVPGFIDSHTHFIFAGWREDEFYWRAQGIPYMEMHQGGGIQKSVD  
ATTRASLEELVRLGKARLETMLSLGITTVEGKSGYGLDKETELRQLQAMDELSTVMPLTI  
IPTFLGAHSIPPEYKDRPREFLAFLVREVFPLFKKRGQTPFVDIFCEEGVFGIEDSRWYL  
EQARAAGFALKLHADEVKPLGGAGLAAELGATSADHLLKASDQDIQALAAAGTIACLLPL  
TAFNLREPYASGRRFIDAGCAVALASDLNPGSCYSQSIPLIFALAVLYLGMSIEEALTAL  
TLNGAAALGLAAQTGSLEPGKDADFLLLNAPSPGHLAYHAGMNLVHSVFKRGILVWQNGN  
VLGPARI\*

>SPBIB\_v1\_310091|ID:27163866| conserved protein of unknown function [Uncultured spirochete bib]  
MVTKRDHGIHLDRTPQERSRLISYINIKLESGLPIYSKEGTGFVQLAADMLESFRQKE  
RLLPRVLPSPDQRIQTFIDRYLADLGLARVPQIPSNLVLDRYGMARELSLPPDGHKHIS  
PTLTSYRVRNGVLHNPKSDRRTTEGVFHIVEGGLPIPPDKKAVPKLAFARILEAALNPPP  
ELLELPFTAGENEKARTFVSVLLRPVVRPEIPGYCEERSMEVRRFFAPGSLVANVDFVESI  
FGNSGDPFIPENDASIDPVHWTGTTGCILATHLTELTKKELGLPHWDEATERQRCDGMC  
WREPTEKYNDGRAFKVCARDESGVILTIIADNYFGYSKKEIKSHISYSANLLGLVEEHA  
GGALVFPSYNLGTFRVPTDNLKSKGHS�HDVFTIMRGRIEMKQEGYAVDLTFPNIYLPE  
DAYISLEDQMAHWVSDGREESLRVLPDYIYVHPTGYRVHMERHPATGAWRLIGTAAEGLL  
CHKPCTVSGGGKSEIAKSIHDAITYMPIIIADFDKDMRAVKEIIEKDYGNRFRDEAENHG  
KDARPVLSPKRSLGSVIKLLSPSPAYNDEYNEWLRSIPERIKSLVFLVKRFYRPDWGDDW  
LSHFSVDAVNGTTGNILKFEGRPIMGSYL RVGKNEHGMNRRFFKLRQDFMPAFKLQWEDDI  
SASIVVPVDQLEDLPEWAQNHL SLKFAKNCEARFFQRPDDAIIRGYDKQTEKDFARQDNF  
VSNFEPLTRADASRIIENTINFYEYTEPMRKFIETEKDPNFEYFVASNCFRLVDGAPSK  
NPRYLQLDPTYVNPQAKYLAELGPRLYRRIPADKALPQPVGAVLPGRRNNPADPKAGIRP  
LAVYGPPIHYQDLPELFMDFVCSLTGKSPSTTGAGSEGALTKGPFNALVPTDLNALLAF  
ILTYAGFTTAAGHIGHKYKMDHDISLMMPELWARMGPEERDPEFLKSHGYLEKVEDFKY  
KGR LIPASRLGWITPLFAATYLGRLFDTPSVVFPEDMLRPELQSLEEFVDGIENIAAAM  
EKSAKAYFEDGSVEAAIPPLKAVLSVMA YGNYEGKSIQDPEVRKLF DREYVLSSDWYRER  
LERYREHEIAYIESSISYLRKFLAERAEPKSLTERRVQAE LSSAHGRLEQLMAPNYLKRI  
WGSIGLDPLYQQQQA\*

>SPBIB\_v1\_310092|ID:27163867|hutH| Histidine ammonia-lyase [Uncultured spirochete bib]  
MQCYRENRRLSITLLYGILKNMNDVIIDGCSLSIPELVVVARHKIPVRLDPDAEERMRS  
REVVELAVKKKLVKYGITTFGFKFCNV TISDEDNALLQKNLIMSHACGQGEFPAPEIVRA  
MMVLRANALAVGNSGVRPLL VQRILDLVNADIVPVVPEKGS LGASGDLAPLAHIALVLIG  
MGEAFYKGNRM PGALALAEAHIAPLVLEAKEGLALINGTQAMTAIGALAVYDALMLYRSA  
TIASALTFQALRGITEALDPRIHELRRQKGQIDAAQDLRWLLED SLLTTKPSGTRVQDAY  
ALRCTPQVHGACVAAIQHVWDIISAELNAVTDNPLIFPHVLHEGGDILSGGNFHFGEPLAL  
VLDYLGIAAAELANLSERRLERMVNPALSEGLPAFLTINGGLNSGFMIVQYSAASLSEN  
KVL AHPASVDSIPSSANQEDHVSMTIAARKARQIIDHSQRVVAMEIL AACQALDLRAIQ  
LGLSSIDESLSPATRSIYRMLRTVVRFTDKDRIMYPDIDAVVELVSDGTLPE SIDRWSWN  
PGPVVPC E EYV\*

>SPBIB\_v1\_310093|ID:27163868| conserved membrane protein of unknown function [Uncultured spirochete bib]  
MKRRESAASLFGVIVAVIWGMTFLSIKVALRELGPMSLSLFRFVIASVLLAGIMAASRTS  
FAIAWRDVPLLALSSFVGVTLYFFFENNGILRLTASESSLIGVIPVVTLIG EILFLRTR  
PGRLIALGIVLSFVGVALIVLRSESASASPLGYLYMVGAALS WVYGFATKPLSGRYPML  
AITFWQM VIGAIGCIPFAVAERQVWAGLSATALFNAA YLGIFGSAIGYWLYVIVLEHLGP  
GRSSVFINLIPVVSVAASFVILGERLSALQIAGGIIAISGVYMATVSSQAKRHQ\*



>SPBIB\_v1\_310094|ID:27163869| conserved membrane protein of unknown function [Uncultured spirochete bib]  
VEKFFKLQERGTSVRTEVVAGITTFMTMAYILAVNPGILSATGMPAGGVFTATALSSAIA  
IFFMAFLANLPALAPGMGLNAFFAFSVVLGMGYSWQLALTAVFLEGILFVLLSFFNVRE  
AIVTAIPTNVKRAVSVGIGLFIAGLQNAHIVKNDATLVSLGKVTQNTGLLAIIGLFI  
MGFLLAKKVKGALLIGILVTTVIGIPFGITKIPESWSPLARPAAPLLFQFQFDKVFITLDF  
FVVFVFTFLFVDIFDTIGTLVGVTQAGLINKKGEIPQVKGALLADAIGTVAGACLGTSTV  
TSYVESASGVAEGGRTGLTALTGTGVLFLALFFAPVFLIPSAATAPALIIVGLFMMSPI  
KEIDLSDYTEAIPAFLTIIMPLAYSIAADGLMFGIISYVVLKALAGKFKDITVVTWIVAI  
LFVLKLIIG\*

>SPBIB\_v1\_310095|ID:27163870| putative Transcriptional regulators of NagC/XylR (ROK) family, sugar kinase [Uncultured spirochete bib]  
MNEQWIFGIDGGGTSRLRIENLEGSLLFQSEGPSLNPRSAGWDGSRQRTL VQLFSEMYEQ  
TGLVPDSCLSGFAGVAGIDRAEDTGTMLGLIRNAARLGPDTALEVKNDSIPALAGAFGEL  
RGILLIAGTGSIAVANGAGRIIRSGGWGHILGDEGSAYWVGLRALNAAIRFHDRRGPQT  
DLLGSALAFFEERDPFALIPAVYEPFDKARIAAFARIVAEERERGVDEVAEQIFKEAAEEL  
ALLAISIALRLGEVLGGRIAFAGGFFSNNERLWHDTIARIIASLPRHRIYSPQADAASG  
ACLLARQNIKPRF\*

>SPBIB\_v1\_310096|ID:27163871| putative Beta-lactamase [Uncultured spirochete bib]  
MAHNSSTDLSEKASTPDRVLAAGPGVPLDALLDSAIANKLCTGAAGAVSIDGKIVWSRC  
AGKTALESDEAQLARTRATSVSEFSISEPPVLEPAVSPAPITTTQTLFDAASLTKPLATA  
LLVMKAVESGALDLDAPLGKYLPEIHSQAAHIPLIALLTHTGGMPAIPALERFFPDSARL  
DRQEALAQFIRSPEFAAGRHRVEYSCTGYILVGAVLERISGMLLGTLFEQEIARPLALSC  
AAFAPRILDSGEPFAFKGAAQTEFCPWRKKRMDGQVHDESAYCLGGHSGNAGLFLSLEDA  
LVLGNLFLQEGISRKQLLRPETMRTMLQERTIGLEERRSIAFKLHGQDTADGPLWPAQS  
FGHTGFTGTSIFFEPGRKLVAVLLTNRVYYGREATAGLIVAFRKEFHSGVWRAFC\*

>SPBIB\_v1\_310097|ID:27163872| conserved protein of unknown function [Uncultured spirochete bib]  
MHISNLPATPVRCGLDHFIAADSSRRNKRYGLATNPSAITSTGIPAWKAFMQNSLGPVCLF  
GPEHGFRGAAQDAVHVKDELFGKIPAYSLSYGNRFKPEPVMLEGLDAVVFDMQDVGCRYYT  
FLYTLAYMMEACETVGVPLIVLDRPNPIGGRKVEGSPIPKEADSFVGGYGLPPRYGLTIG  
EFARYLRGEYYPDCALEIVPLSGWDARQPWAETDLPWPLPSPNLPSLSCAELYPGTCLVE  
GTWLSEGRGTSRPFIEIGAPFVDGEALREALSALGLPGLVFMSLFFTPTASKYK GALCEG  
VLVSVDREAVRSLDTGIAVVHTIHRMYPHDFRWREDWENPELSFFDRLAGNTTLRCMID  
SGAPLEECLAF AHEGEERFLKLRQNYLIYGAI\*

>SPBIB\_v1\_310098|ID:27163873| Binding-protein-dependent transport systems inner membrane component [Uncultured spirochete bib]  
MMFKLNGLQKAIAWIFLALLAFVNLYPIGIMILSSFKSTREIFLKPFNLPAVWRWSNYVS  
AWQRADFATYFKNSILVTAASIAAILLVSSMAAYVIARFDFKFKRGIYLFLLAGLALPTR  
LAIPIFLIMRSLHLLDKLSGLVIVYAAGGIAFSVFLVNFKFKLPRDIEDSAKIDGAGP  
FRIYWQIDLPLLKPALVTVAMFNFDVWVNDFFFPLILLSSRVKKTIPGLQAFFGEYITIE  
WDVLFALNISVLPILIFLILSKQFIAGMTEGALK\*

>SPBIB\_v1\_310099|ID:27163874| Permease component of ABC-type sugar transporter [Uncultured spirochete bib]  
MRGRAGRSLSDRPGKAGSSEARPILYLSEVDVRKYSFLWMLFPALLLYTVFIAYPFFSSL  
GLSFYDWP GIGPKKFIGLSNYKNILSGFMAPEFYRALGHNIVFFIWSLILSVVPGLFFAF  
LLSADIKGTKFLKVIYFFPNTLAIVVVGFLWGLLLNPQWGLVNQLFRVLGLGFLAKPWL  
NTSTALPTIIFVTAWRGLGFYILVYLAAILGIDREMTEAARIDGATEMQIAGRILPHLL  
PIIATTSMLKFIWTFNIFDIVYAMEGTQGGPAGSTDVLTGLFYRIAFGGGLGSSQVGMGLG  
ATVVTLLIFLLVFPVSIFYVFIVEKRVERGE\*

>SPBIB\_v1\_310100|ID:27163875| Extracellular solute-binding protein family 1 [Uncultured spirochete bib]  
MAKRFLMAMLLLCLMMPAWAQSKPATVTIWGWRAQDQVDVWKS VETALKAKGEQITIKYEV  
FPPTEYDSKLLVSLQGGVGPDLMYTRRLPGARTQALIDNSYL VPLDSSVDLSNFDNVLSL  
FIRSNNKTWGVPFANQIVGIFYNKAMFDKYK LKEPQTWDELVQVAETLQKNGITPFFVSG  
KEAWTLAMQNAMVGVSYPGDAWIGKLAEGKAKFTDPEYVNMLKDLNALKKYYQKDFMANT  
TAEQDVAFAMEQVAMVFGVWGNTNWLKTNPD LKFDYFPVPPKDKNLPAKAYIYMDGAYG  
LSSASKNKDAAIKVLNYAGTKAYGELFSSTTGEITAIKGVTMPASKPILVKCYNKMVTIA

STNRYWVGSPFDAGMPSVYNILQENMQKMYLDQMTPEELAKKLQDGISTWYPAFKK\*  
>SPBIB\_v1\_310101|ID:27163876|yfeU| putative PTS component; possibly regulatory [Uncultured spirochete bib]  
MDFQALDDYLERATTESRNARSANIDKLP TIEILRIINEEDKGVPF AVEKVL RDIAALVE  
DIVRAFTSGGRLVYIGAGTSGRLGVLDASECPPTFGVPPGMVVGIIAGGEAALRNSIEGA  
EDEPEEGMLALRNIDFC SRDVLVGITASGSAPYVLGAMQYAREQGSVVGAI SCNRESKTF  
ALAHHRILLEVGPEVITGSTRMKAGTAQKLVNMLTTTSMIRIGKVYGNLMVDLTPVNRK  
LVDRSKRLIRQATGCTKDEAEAAFLASGGKPKIAILMIALGISAETAQELIQGGQGR LAD  
AMRIYSQSKKGR\*

>SPBIB\_v1\_310102|ID:27163877| Transcriptional regulator, RpiR family [Uncultured spirochete bib]  
MNYGALETIAQSM PRLADTERRIAEFVQAS PQKVLHLNIAELARQAGTSSAAVVR FCKRI  
GAEGYSDFKLWLAKDVYQGWNEKYLPDLGLESQTPASKAIHDMAEAVRR TMSALAAATLSP  
QAVEEAAERIRTAAMTALFGVGASGLVAADFHQKLSRIGLPSSYLFDTHAQITASCALRP  
QDIAFVISYSGETDAMIEVADQAKARGCFLIAMTMAGTNRLCGRADLALSIPAVERVYRS  
AAELSRLSQLAAIDILFNVIISYDIDGAI AALERSMQATHGF\*

>SPBIB\_v1\_310103|ID:27163878| putative Diguanylate cyclase with PAS/PAC sensor [Uncultured spirochete bib]  
MSIETLRTILYATSAIVGFLVIYSAARQKSHLARYFFFAALCAFLYIFGYASELGAHSLE  
EIRFWLKF EYFGLSFVSSFWLLSWKLWYSRNPRFRMVVLV FVIPAITLFLVSTQEFQGL  
FYRSLRLSDIDGHHLAII EKGPWYVWQLVYQS AFIIMSILQWLSWRRRGGVFKSSGFWM  
FVSTLSLLPWIVYQLGKSHNGIDLAPFGIALSIF FIAIAVLR YGTLSSEEVFLYSIFAG  
IDDGVVILDRDGRISDFNAAQKIFPWLNSSSIGMPISDPADASLFNFDAPLKMEKVVEL  
AGNKRY YQGRFTLIYEGRSVLGRVYFFRDITDSRRLTNRLRKL ANFDALTSLYNRRRFME  
RAEKVLANAQRAWKNIALLMIDVDHFKNVNDRFGH AVGDRVLA AVGRIIRRRCKQKGFAG  
RYGGEEFVLLRGAQREQALDIGEGIRRSIEGIAIEKRMIPVRVTVSIGVSSCSEKEGAY  
DLDELLMSADRALYLAKNRGRNRVEG\*

>SPBIB\_v1\_310104|ID:27163879| Isoform II [Uncultured spirochete bib]  
MKKFLSMIALFAMLLPAVWSQDNHIDTIRADAPALADYGPYTIGVTTLTFVHPGQPDIVN  
YKPGQPMPT YDRPLTCEIWYPATLVPGQAPS GEYLN VVTRDPSLKV TLYGRAVRNAAPDK  
SAAPYPLVLISHGYPGNRFLLSHLGENLASKGYVVVSIDHTDSTYS DQGTFPSTLYNRSP  
DQFFVLDSMARLNADDRGTGLAGMIDADKTTLIGYSMGAYGVVNSLGGGLSANIVKNATF  
SPGNILEARAAGNPAYTASLDQRVKAGVAIAPWGMNYGFWD AEGKGIKTPIFFMAGSKD  
TVAGYSPGSHTIFDLAINADRYFLT FENGSHNSAAPMPAPKEVRAKGS LGAKVASHYLDA  
VWDNVRMN NIAQH FITAFLAKYIKGDPNADSWLALIENGADGKWSVDEK GQPKPDHTYWK  
GFGNNQAVGLKLEHRLPGAR\*

>SPBIB\_v1\_320001|ID:27163880| protein of unknown function [Uncultured spirochete bib]  
MMRLSLYLLGHNYLKPFRIRAHKGMHPRTHAE AAGIPVHLVQH FVQALTGGIRAFLSRCT  
LSETMRRTWEKRWKTGPKDKAEYLPKYALA\*

>SPBIB\_v1\_320002|ID:27163881| conserved exported protein of unknown function [Uncultured spirochete bib]  
MKRKVAVFAVLIGLVAFAVFAETSLPLYGNAAAKADNALTIESMLTYAIQDEYLARAEY  
VAIMAKFGQIAPYSNIKQAEEQHISWLKDMFATLKLAVPADEAAKYIHAPGTLKEAAQAG  
VQAEIDNIAMYERFLAQPV LKDPRYASVVDLFTLLRDASKNH LAAFQKQLQKY\*

>SPBIB\_v1\_320003|ID:27163882| DGC domain protein [Uncultured spirochete bib]  
MAENSGTNNVEFRRLQGCSTD TENMDIIFACDGAASVGVGNHVAIDL TNAGV GARMCCT  
AAVGAGSDAHVNIGKRARRVIAINGCANRCVSKIMEQRGVKVAHEYVIATMGVSKIPTLD  
FNEADVERISKKIAEDLGYDIKAKN\*

>SPBIB\_v1\_320004|ID:27163883| Two component transcriptional regulator, winged helix family [Uncultured spirochete bib]  
MTIPTKIL AIDDEPDVTRSIRLTIAVQEP EWTVVEASSGEQGLM LLSQEKPDLVLLDLRM  
PGMSGLET LRRIRAFSNVPIIVLTVTNNELDEVNSLEEGADDYITKPF GHLELVAHIKSV  
LRRSRGHEPGHEEKY YDGEFSIDFGRRIVAIGYREVPLTSTEYALLKILADNPGQTIPAE  
TLLARVWGPNALDNRNYLKVYVRRLREKIEKNPAEPEYLISVRGLGYRLERHSK\*

>SPBIB\_v1\_320005|ID:27163884| putative Histidine kinase [Uncultured spirochete bib]  
MAYMARSSGKFRAVSGLSIRKLLPLR LFPQKSTIEHKPSSIKEQTIDYFLPVARAGVVA  
VSALIILAEYHQIQSVVPALWFL ELVLYNIAAGLYSRTSSMLSKKRYLAIISDMLEAT  
ILVGVTTGGYDSPFFPMFLFVMAELALYFDWKIGALS IITMNGLQIIFTAIQMAGAEPQVK

FEVIENRFFRLIIVGLLFLVLAESLRKEDLARKRAIHLISGLISRLNDIFAQLGNAQFDID  
KVLHTILQGANALDSVAFSAVMRQVVPDKKWKIQAALGDSVCTPYIPLDSLGNLIDSMGD  
SEIMATEKIKDFSPCSSAVQQFVMIRLPAYSSKENGVLVGINTTDALEPEDKTFLHALS  
IQTQLALHNAILFNETKQQYEALKSFKKTQNTFFSSAAHELKTPLTVLKVLVSTLAMTAS  
SWTKDQREMLATIQSNVERLETLTNMLATARLEAMNVALSRQPVDMKAI AERTVREMLT  
LIEEKNLTITIAPEEPWPPFFADPARIRDIIANLLSNAIKFSPVGGGLIGIHFEQTGAMGR  
ICVSDAGPGVPPTERDKIFEKYYSQDAGARAGTGLGLYIAHQLALLHGGDLWFDSRGS  
RTRFCFSIPLYLEGVTEDDHSDENSGNR\*

>SPBIB\_v1\_320006|ID:27163885| conserved membrane protein of unknown function [Uncultured spirochete bib]  
MKTAKTLGWLTGVVGVWEILAPFIIGYSNVGGATANAILGILLAGFGLWVGLGKAAGTV  
RTLSWINALLGLWVLLAPFILGYSGTSGGATWNDVIVGIVVIILEVWGASAAKKEA\*

>SPBIB\_v1\_320007|ID:27163886| protein of unknown function [Uncultured spirochete bib]  
MKNPQEKMKSIKSVASPDPLQNLNVYLKLIPISEFTKLIPSVDPVRYRGSVCFS\*

>SPBIB\_v1\_320008|ID:27163887| protein of unknown function [Uncultured spirochete bib]  
MRLLEYRLDWQYSAAAMQQALASACGTSVGKNLYVFDYYDAVLEAIGKNLGIDFSKQSRT  
LQEIRHLLAQTQRKH\*

>SPBIB\_v1\_320009|ID:27163888| IstB domain protein ATP-binding protein [Uncultured spirochete bib]  
MIRTPQERERTRITIASMSRKLMLSSRVVELCESEATPRQEEFLKVLSEEIDRRERGGK  
ARLLNRAGFPVFKSFEDYDFSEIRFPPALSKEELLRADFIPEKKNLVLYGGVGTGKTHMA  
IALGIAACEKGLSVRFLTVTELVLKLTEAYKAGTLERLIRDLKQLDLLILDEWGYVPVDR  
EGSQLLFRIIADSYESKSLITTNLEFSKWGGIFTDEQMAAAMIDRLVHHGHLLEFEAKS  
YRMTHALMRQPGGTAKPKTTVEAGSRLGEGGA\*

>SPBIB\_v1\_320010|ID:27163889| protein of unknown function [Uncultured spirochete bib]  
MNNPGAWKNSGIRELIPDPLKSLMDRQQRTQLHATLKTMTLSSEYGFIEAVQALEEGVQ  
RSRTSFHDAAILAARIAGYGLNMAPERGQDLHVYDEFLEGVQV\*

>SPBIB\_v1\_330001|ID:27163890| transposase [Uncultured spirochete bib]  
MFLXTLYXKKTGRTRLKIVEAYRQDGRPKQRMIQDLGYLDELQXIXPDPIAHFKXVAXQM  
TAEKKAQKESRQVQLDPYAALRPFDPAPATISRKNIGYAALSFLYHELIDTXLNNXXR  
GTKFXANLNSIXKMLVFSRALFPDSTRGAWENRGIFFEADYSHDEXYRALDYFLAWRPA  
LVRQLHERLKTRYGRQTLFFYYDVTNYYFEIDEPDSL RAXGVSKEHRPNPIVQMGLLLDA  
QGLPVSVELYRGNTNDGTTLPSMLDDAVLDLGMHMLIMVADKGMMSGDNI AKLRLGHG  
VMSYSVRGADKAFQEYVLDEEGYTA VYD TDGTL LAKHKSRVAPREI WVTDRK GKRTKSLV  
NERQIVVYSAQYAQRARMERALAVEKASGQIYALSKDAKPSAYGA AKYLKKVPFDRSTGE  
CMPETEYLVMLDEARIEKEEQFDGYYVICTNVIGXEXGEXXFXXPYXYTXDGGFFQLNRTV  
TDDDIIEIYKGLWRIEETFVKVMKSELKARPVFLSTESHIRAHFFICFVSLLLMRLLEXRL  
DWQYSAAAMQQALASACGTSVGKNLYVFDYYDAVLEAIGKNLGIDFSKQSRTLQEIRHLL  
AQTQRKH\*

>SPBIB\_v1\_330002|ID:27163891| protein of unknown function [Uncultured spirochete bib]  
MXEYSTVLNALQCITYNIMKNIVKKFLAAYAKRNYFSVPLKETAKVRRGSI\*

>SPBIB\_v1\_330003|ID:27163892| protein of unknown function [Uncultured spirochete bib]  
MKNPQEKMKSIKSVASPDPLQNLNVYLKLIPISEFTKLIPSGLLQFLSKAQRNNSFSHKLLEIFLQY  
FS\*

>SPBIB\_v1\_330004|ID:27163893| protein of unknown function [Uncultured spirochete bib]  
VGFSKSHDVNKMMTNIAKIIMSFSFFNFLL\*

>SPBIB\_v1\_330005|ID:27163894| exported protein of unknown function [Uncultured spirochete bib]  
LKKLKLIMIFAMLVIIIFTSCDLLKPTGTLTSLATDPWLPTITFSGQKTQLEKDQTMVT  
ATVSPAPDTYAWYLDGKAISGATTNSLTIGSTLEIGTHVITLIVGKGDYRSSEEFMEVI  
PVAAAATLAINPATITNGTINTTYTFTLTAASLPANLTQVKFNWNFGDGTDDSETVTVSN  
KTA STTISHAYTADSAYGLVVTIDDGTNTLATA YASILIGTANAGTNYDLTVLDQWTAAN  
SGGYGITVDTWDISTLPNGVVFDFLKFDAYSMPDKFIVEYDPGTIVYNSGWRGDASYEGPK  
YPGGIAGIGAGQSLAMFAKGTQQYFKITIIGGESGTAWEYSMKARQP\*

>SPBIB\_v1\_330006|ID:27163895| Cna protein B-type domain (modular protein) [Uncultured spirochete bib]  
MMQITKRISILFLIMVAGLLFGCMQPLSQSAGKGDVEVLIDGARTIQPSDVEIKIVSY  
VLSGTGPNGATLANKTFTASPYTESKLAEGAWTFTVNGLNAAGSIVASGSNTATIIANST

VSVSVVLTVPVKDGS GTGTFSLSGTIPSAVTLSSFTGVIAPSTGGANTTFAVTVSGTNFSY  
SNSTLPVGSYILTLVASQAAGAWRGVYALRIYQGKTSTLSLNLTA DDFAGATINGVAKYY  
DKAANQYSGISVTTITSTTDFAPASVTTGNAGSFNFTGLDAGTYIIEAKDPNAVYQPTS  
ITITIGSNETVTTPLDLVLT KAGNHVVFIRDSNTEWELAGVPATVMGDLIETEIGLTEGTG  
ANQY EYKTSSDMAAYTPSLGDVVIIGGDQSQAFYDAYTTNKS KFDTFVNNGGTMWYIACD  
NGWAEGDFTSSLPGGVTWRDSYEYYIDIVYFQHPITKNFPTQLYGYASHGGFDNLDVAN  
ITGLMVYVKEDAGALPTYIEYRYGLGKVLATTTPLEYYVTNGSTDMPTGFNTTYKDLFKL  
MLVRSIKYIMGKTVSDTIPASDAGAIPKALTPIRMSH\*

>SPBIB\_v1\_330007|ID:27163896| putative Subtilisin-like serine protease [Uncultured spirochete bib]  
MKKIALLIAGIVLLILGCQPTITYFSLAVSVSGTGGSVVITYPNTTSIEKGSSVLLTAVPS  
PGYVFDSSWGGITSNQNPLSFAMNQDYSIVAHFKVLPADTSKTVKYTLDAQWESYEKYDR  
LINTVASVKSIGSKAVPNFKTADYFSLDVNASSRPKAILVKYKTGVSQKSADSLKSIGTK  
DLMLDASVPPFQRIVVNSDKYAEIPSMLSFLKSQPDVEWAEEDLISKALYAPDDAYYSYQW  
NFDKIGMPAAWDYTMGESDVIVAVVDTGAYFPLTDLGQTRFVQGFDFVNNYL NPFDDNGH  
GSHVIGTIAESTNNGIGVAGMAPGIKIMPVKVLAWDGFYASDIAQGIYFATNNGAHIIN  
LSLGGNYSA AIEDAVNYAISHGVLVVAAGNDGTSTLNYP AALS NVLSVGATNDLNLV LAP  
YSNYGYGLDIVAPGGDFSRILHNNEY NEDYPAGILQQTY YGGSIGY WYFQGT SMAAPHVA  
GLAALLKSKNNSLTAADITAIENSATDLGASGYDTQYGYGLIDAAKALGIPGYIVSDQV  
TSSIVLKPDEIEKWQINAAPGALIALTLGFASDTGSLSFSLVNSEGTEVA VGSQANNAINL  
NYIVTSANKGTY YFVIKYKP\*

>SPBIB\_v1\_330008|ID:27163897| Hydrogenase [Uncultured spirochete bib]  
MIKALRSRLHQGYKTNAFPAENRPLPERYPGAPRLETERCTVCGACKAICPTSAISVQSG  
EPAGAEPRLALDLGRCIFCRKCETACPEGAI AFTGSFRMGARAKAGLVLGSPHVSSTRT  
SRLDVSNDAHKAVSTGAGN QALNSEETRLIEALDRKMLKIFGRAMKIRQVSAGGCNACEA  
DVNVLETIGFDLSRFGISITASPRHADAIIVTGPVSKNMELALRKTYEAMPSPKLVI AVG  
ACAISGGIYRGLPDVCGGADAVIPIDLYIPGCPPHPMTILNALLELLDRVPRKN\*

>SPBIB\_v1\_330009|ID:27163898| NAD-dependent dehydrogenase subunit [Uncultured spirochete bib]  
MKLFTNGSAMSVEDIPVVD FEFFARSIAEAVKSGASIVALFAVPDYGKGAARTAAELTAL  
PTNAATEKRARLFAFLGLPTKGMIGGIAADIGSAPPSLTPKIPQA HMFEREIFENTGIVP  
VGHPWLKPV RKIFDYDFYSLEGGQTHEVA VGPVHAGVIEPGHFRFQCYGEEVEHLEIALG  
YQHRGIEKALAGGPDRTIHF METSAGDTTIGHATAYAMLIEALTSTQPDARAEAVRGIA  
LELERMANHIGDLGALAGDVGYLPTKSFCGRLRGEVLNLTAEICGNRFGRGIVQPGGVGF  
DIDEKMATSIAARLQKIVKDTDEAVGLLWDSPSVLARFERTGMLKKETALELGLVGPAAR  
ACGIERDVRSDYPSGIYKYAAIPVATYPSGDVYARAMVRMLEYQRSASAILDVLAALPAG  
NTGKPASRALPARSV ALSVEGW RGKICHCAITDNRGAFLYYKIVDPSFHNWPGLAYALR  
GQQISDFPLCNKSFNLSYCGFDL\*

>SPBIB\_v1\_330010|ID:27163899| putative Hydrogenase-4 component F [Uncultured spirochete bib]  
MNMLFGGFLAVPVFGVLLILVSKSSRQALMIMLATALGGALLSGALAAQVAQAGVIEVAG  
GLFRADHFSAWHMILAIIVFLPSSVYAYTYFEGGKGIDLYAKRFGMLWLGAF AAMSTA  
LLSGNIGIMWVAIEASTLFTAFLIFRQGN AASLEAMWKYIIMCSVGVAF AFITLLMAAA  
GQQAGLEGGDSL LLLQKIYLRGALKPSLALTA FIFILVGYGTKAGLAPMHNWLPDAHSQA  
PGPVSAMFSGFLLNAALY CILRFLPLFSPSDGGASVLQGGKAGSMLVGAALASSKAQIL  
MGFALLSLVISSAFIFFQKDAKRMLAYCSVEHMGIIAFAYALGPVGTIAGLFHTLNHSFA  
KTAGFFSAGSLGKKLHTNELARFSGASKRYPLYAIGFAVSLLALIGVAPFSVFMSEFMLV  
SSTVAARRFVPLAIFLAATSIVFLV MLKHAIAILWKSPPDQAQAYTPGCAPGGTFSGAPA  
IAPHKNANPTEFSAPSGVPPISEYL VIGLPLAFLVLGLWMPHGLSDFLTKALDSLWSMK  
\*

>SPBIB\_v1\_330011|ID:27163900| putative NAD-dependent dehydrogenase subunit [Uncultured spirochete bib]  
MTSLQNMLLIVVLITDLTMAANSRLGTCINITAIQGFALGFLPLAIGLEKGMNFELVAIA  
VIGIALRGILFPYILHRSLNSGTSRELKPIVGYFLSVAIVLVLIFASLWISIRIDFIAP  
QLLLLSTVALSTIFAGTFFIVGRRLAIMQILGYILLENGIYCMGLAFVQDIPMIVELGVL  
FDAIVAVFVMSVATNKIHEEFEHFDIQKLD SLKG\*

>SPBIB\_v1\_330012|ID:27163901|hyfC| HyfC [Uncultured spirochete bib]  
MNDILAKLLPLVVALVFAPLAMGIIQKVKAFFAGRKGFVPVQMYRDLYKLMHKGIVYSRS

TTWVFR LAPLLVLA VSLIAVAWLPLGGLRGLFSFQGGFIFVAYLFGLARFATLLASLDTA  
SAFEGMGANREALFAILAEPATLLAFAALILTSGNSSLWGAIWQESSFAEFGVPLLA  
LVSFILALSNSRIPVDDPTTHLELTMIHVEMILDNSGPDLAYIEYASALKVWFYLVLM  
ANIITAFSISGWAQILAMFGFAFLLAGIIGVVESSIARLRMKKVPDFIGSAVAFALLAL  
VLEGIL\*

>SPBIB\_v1\_330013|ID:27163902| Hydrogenase-4 component B [Uncultured spirochete bib]  
MMLFGIGIGVLVGGGLLTLVLKKSAGINKLGMASVVAGNVFVIVAALLGLSGRYAGEVYQ  
FFLPLPVGAVLFLSPLSSFFLLIIAVVTGLAAVYAPKYLAHYGEMPWRFKAHWLLYNLL  
AASMMLVVTAQNAVFFMLAWEGMSLSSFFLVLFQNERTKVRRAGWIYLVFTHVGAACLLV  
MFALLAQVSGSFDAMDAMRAAAAGFSPGLKAAIFVLALVGFGMKAGFFPMYVWLPEAHPAA  
PSHVSAVMMSGVMIKTAIYGIVLTLGLLGGGQGTLMWGWTLVVLGLVSGIFGIAFAAVQQ  
NAKRLLAYSSVENIGIATGLGVWFIGMASSNEVLARLGLMAALLHTVNHALFKSLLFMG  
AGALQLATETLDLDRMGGLLKKMPSGLAIIAGAVAISGLPPFNGFVGEFLLYSSVFAQG  
FGSSLVRAVYVIAILGGLSIIIGALAVFTFTKLVGTSLLGEPRTDHAHAHEVPASMYVPM  
LVLAGLCLFIGLPLPVMSALKVLADSGLAVVQGQLPSGIVSSLAAMQWVAFALIGLIGV  
FALVRSRVLSLHKVENTSRHKVGGSTTWDCGYHNPTPRMQYTASSFAQPLASFAQPLYSPI  
RDGSIGPDLFPAPVARKISFPDLILDRAIKPMYSWISRAFETFSIIQHGNTHWYVLYIVI  
ALLAVLWFSFVI\*

>SPBIB\_v1\_330014|ID:27163903| DNA-binding protein, excisionase family [Uncultured spirochete bib]  
MKLSVKDVSRLFNISDKTVYRWIQADNLPHYRIGGQYRFSYSELLEWAAAHGAKIRAEFL  
DEVAEADDCDVSIATALEAGGINYRIEGSTKEEILSSIVSLMRLPESINKDIFLQFLAR  
EKLGSTAINGIAIPHVRNPVVHSETPQISLFFLEKPVDFGALDGVVSTIFLIVSPNI  
RCHLKLQAQLMFVLRDEKVLMLSKVASRNEILAAIRNAERPVLERRQSEIEDMSRAHTA  
SEQQGGEP\*

>SPBIB\_v1\_330015|ID:27163904| membrane protein of unknown function [Uncultured spirochete bib]  
LPLPGAFAAFRDEPCYLRLSSNTDVLNMNIELVAAAEFAKSEARNYLSYGIIFGILIAMA  
FYGFFLVSLKYRSYLYFILYTVSVGLWLFYVQGFQVLFQMPGFDQAMLWFWAGMFIT  
WGTIFTISFLELQKTSRFLFYILAAALGKATQHAALVEMSLSFSCPAFQRTRHFMLQSES  
ASISKPRACA\*

>SPBIB\_v1\_330016|ID:27163905| protein of unknown function [Uncultured spirochete bib]  
MRIIDGQSIATISLGIVDLQGNESAESFIERADSAMYAAKQRGKNCVVM\*

>SPBIB\_v1\_330017|ID:27163906|appF| Oligopeptide transport ATP-binding protein AppF [Uncultured spirochete bib]  
MNNVILELKHVSKHFALSGLRNISKVVHAMDDVSFFLNKGESLALVGESGSGKTTTASVI  
AGMYEKTSGEYLDGQPVLPFKTREASLRYYKKKVQMIFQDPFASLNPTHTIRSILERPFL  
IHKLAGSTRELEAMLCDSLEMVGLSPAKEYLHRFPHELSSGGQRQRVNIARTFAVSPEIL  
ADEPTSMLDVSIRIGIMNMLDLKEKKHVSFLYITHDLAGARYMSTRIAVMYAGMIMEIG  
PTEEVIANAVHPYVQLLKASAPAQEGVRKAAIPAKGEIPSLVHPPSGCRFHTRCPYAKK  
ICSEEVAMPARDIGNGHFVRCVLV\*

>SPBIB\_v1\_330018|ID:27163907|oppD| Oligopeptide transport ATP-binding protein OppD [Uncultured spirochete bib]

MHADAILLRNLKAGYATNAGFVRAVDDVSLTLHRGEFLGIAGESGCGKSTLAYSIMRLL  
RDNARIESGSIIFDGTDITSLDEKAMNEYRWTRMAMVFQSAMNALNPVLSVEEQLVDAVL  
AHKQVTRADAKKTAMEMLELVDINAERIASYPHQLSGGMRQRVMIAMALLLKPDLLIMDE  
PTTALDVVVQRSILQKIEELRHIFGFSVIFITHDLSLLVEISDSLAIMYAGKICEYGPSR  
EVYASPDHPYTKGLMNAFPTLTGPISRMGGIEGQAPSLSPPPGCRFAPRCNVAIDACTK  
EVPLLQVTSPPGRLCACRLCGGNHE\*

>SPBIB\_v1\_330019|ID:27163908| ABC-type dipeptide/oligopeptide/nickel transport system, permease component [Uncultured spirochete bib]

MIRDFFKTLIKNKKSLSGLVLLGFFILVALFAPLLAPYPPKTDREHTTLLLEENKGDPEV  
LSEETEGQNREKSVYTVTITQKYEKTTEYFPTRAKPSKDHLGTNHAGNDLFSQIIMGTR  
VSLFVGLATGLFVTFISLSLALLSGYLGILDDVISFVTNVFLVIPGLPLMIVIGTYVPM  
HGVLPILILSLTSWPYPTLRLLRSQVLTLLKNRDFVRASKMIGERTSFLIFREILPNMISI  
VMSEFFTVSLSAILGEATLEFIGVGNITVVSWGTLIYWAQANGAILMGAWWWFLPPGLLI  
ALTGTAFVLINFGIDEISNPRLLRKR\*

>SPBIB\_v1\_330020|ID:27163909| Binding-protein-dependent transport systems inner membrane component [Uncultured spirochete bib]

MKYLARKFGMLIFTLFVMSINFFLPRMLPGDPAKALMDRMIEGVEAEKLESVRAAFGLDT  
KDSLVPVQYGKYLNTVKGDLGISLSRFPMPVSSVLASALPWTIGLMGLCTIIGFSIGTLL  
GIWAAWKRQTKLASFTVGGFTFIRSFYFWLGLFLIYIFSFKLKVFPPLGGAFSVDQTRGS  
AGWWLSVVQHILPAFTITLSSIGAWLLMMRNNMINVLAEEFITLAIKGLPMQRIRLMY  
AARNAILPSVTGFAMSGFVGGGLITEMVFAYPGMGYMLYQAVNAKDYPLMQAIFLIIA  
ASVLVANFLADIAIMLLDPRVRDGAK\*

>SPBIB\_v1\_330021|ID:27163910| ABC-type dipeptide transport system, periplasmic component [Uncultured spirochete bib]

MKKKLMVAMVLLSLFVATTVFAQAPARGGILKMTPSKQGVLQKNFNPFS PAVLESALGCI  
YETLIYFNNANGTANPWIAESWSWSNDLKEITFVIRQGIKFNDDGTPLTADDVVSAMLGK  
TNKALDMSGLWSEGLQDVTASGNEVTFKFATVNVTTLEKFGNLYIVPKAIWSKVQDPLTW  
TGNTNPVGSFPMLDPASFNEQSYKLVNPNYVWQKGADGKPLPYIDGIQYVSTTNEQIAF  
KLMNGEYDWAAYS LPNVDA YVAADPANNKYWFPEGNLVFLYMNNLRPPFDNVNVRKAFAM  
AISQKDITRKMSPSPVPADMSAVKKSFSIAEEGKAKYNITYDKAKARKLLESEGYKLN  
KGIYEKDGKALSFKLYVPTDWDWIGAAETIASMLKDIGVEAITQSAWPVPFQTSLETG  
DYDMAVSFITTGTPYQFNRLYSANYAGLGEKAKVFSNMRYKNADIDKNLEAYRSEPN  
PEKQKVYISAVVTQFMKDTPCVPLFFNPTWFEYTTNRFVWGWSADNPYAWPSVIGMQKVP  
ILLNIHKK\*

>SPBIB\_v1\_330022|ID:27163911| putative Uncharacterized lipoprotein YbbD [Uncultured spirochete bib]

MRWEYNDPFMIEHTSWQYKKHLPLEWKIGQMLAVGFPAGADGIASLARVVKASYAGNVIL  
FTRNTPDVAETRKAASVKTLIREVTGVSPLIADQEGGIVARLKGGLTPLPGAMAQAAA  
YLGGGIQKSDIKALGKICAEELRSLGINWNLAPVADVNSNPSNPVIGVRSYGENPKLVAD  
LASAFAAGLEEGVLATAKHFPGHGDTSDSHLDIPLVPHGIERLEAIEFVPPFRRLVDEG  
IPAVMTAHIRLPSVEPDMLPATLSSRVLQGLLRKKGFEIICSDCMEMKAIADHFPNAF  
VMAVKAGVDILFISHTAEKQLYAAHSIYEAVKKSEIAESQIDASVERILAAKEKINQTS  
FDA YKKT VAGPHAV ALAKKISRTSLVLAQGSITKPPSGSVLVDVVPGNITNAEDSLHSV  
SIHAELTRQNAPIFSCAVPLNPKEEDIAAALSCAERYLSAPASAIQETEA KPALILALHA  
PMLHSGQMKL VQASVRFAQDRSCPLL VILTRNPYDAPSIAKEAARANLPAPTIVCSYEYS  
EASVASIVAFLTGKLEAKGICPVTVEG\*

>SPBIB\_v1\_330023|ID:27163912| putative Acetyltransferase [Uncultured spirochete bib]

MDYAINTEPLLKNESSLWNRCLGSEFPLDIRLLVQQISLDRDLHVFFARDEASGML  
IGAVLAKRATRPNLNGEIPARSYISCILVAPEFQHKGIGKNLLKTAESWCRHQHAATIAL  
GSDYFHFFPGPPYNATAESDHAI AF FEASGYTKGTIEEDVIANVQSLDIPLPPASRTTKA  
PGFHACSTPELRPRIFDFIRAF PGRWNNEIHEAFAAGMRDEDLVLVIRDSQSVAGFA  
RIYDEESPILGPGLYWRALLGPNPGALGPIDAA YRGLGLGMDLLRAALAEKARGIRN  
TVIDWTDLGAFYAKLGFVPWKRYVMMQKKIE\*

>SPBIB\_v1\_330024|ID:27163913| protein of unknown function [Uncultured spirochete bib]

MAHSLPVSTSRPPRARGLKPVQNTTSNSYNLVAPPAGAWIETNVVVGIVKRIASRAPAGR  
NNKHFSAGTQKNKPSTLQK\*

>SPBIB\_v1\_330025|ID:27163914| protein of unknown function [Uncultured spirochete bib]

MLLEAGLNLVVAPPAGAWIETDPLKSDITNDIVAPPAGAWIETE\*

>SPBIB\_v1\_330026|ID:27163915| protein of unknown function [Uncultured spirochete bib]

MLLEAGLNLVVAPPAGAWIETTKETVDENGTRQSRPPRARGLKHKPWL\*

>SPBIB\_v1\_340001|ID:27163916|cas| CRISPR-associated endonuclease Cas2 [Uncultured spirochete bib]

MMVLVSVDVNVNTPGGARRLRVARTLSNHGQRVQFSVFECVVDPAQWVKLRADLENIID  
KENDSLRYYYLGSNWKHRVEHIGAKPSLDLDDPLIV\*

>SPBIB\_v1\_340002|ID:27163917|cas1| CRISPR-associated endonuclease Cas1 1 [Uncultured spirochete bib]

MRKLLNTLYVTTQGSYVHRDGETVVIEQEKKILQVPIHMISSIVCFGNVLCSPALLGFC  
AERSVSIAFLTEYGHFLASVNGPTTGNVLLRRNQYRMADSEESCRNISANIVA AKCANC  
LILHRGTRDHGEKIDTHSIKMASSIERLIGQIDSASDTDAIRGIEGMAAAEYFAVFNQL  
IVDQKDAFMFNDNRNRPPLDPVNALLSFIYTLVHDIRSALETVGLDPAVGFLHKDRPGR  
PSLALDLMEEFRPVIADRLVLSLINRRQVNPKGFSRAANGAVTMDDETRKTVLVEYQKRK

QEEVYHPYIEETVPIGLLFFIQANLMARFIRGDIDGYPPFFWR\*

>SPBIB\_v1\_340003|ID:27163918| CRISPR-associated protein Cas4 [Uncultured spirochete bib]  
LNEDADLIPISALQHLLFCERQFALIHIEGIWSENLFTEAGKVLHERVHQEHHEKRRLYR  
QEFGMAVRSLSGLIGKCDLVELYLEPSGKIAEAFVFEFKRGKNKEEEDKVQLCAQAMC  
LEEMLDIMIPEGQIYYLQDHRRTIALDQALRKKVVQLADRARELILKGETPLAIFEKRK  
CTTCSLVEQCMPSSSTGLQSKSVSRFIRAQLKATESECDK\*

>SPBIB\_v1\_340004|ID:27163919| CRISPR-associated protein Cas7/Csd2, subtype I-C/DVULG [Uncultured spirochete bib]

MSLEKRYDFVLFFDVKDGPNNGDPDAGNLPRIDAESGHGIVTDVCLKRKIRNYVGLVKNE  
QPPYEIYVKEKAILNKQHERAYIALGIDLSSDEGKRKGGDKVDIARDWMCKNFFDVRTFG  
AVMSTGINCGQVRGPVQLTFARSIEPVVASEHSITRMAVATEEEAKKQGGDNRTMGRKYT  
IPYGLYRVHGFISAPLADQTFSEEDLNLLWDALEHMFHEDRSAARGLMSSQRLIIFEHN  
SKLGNRPAHELFAIEVVASDSTAPARDFSDYKTMLDGNIEKAFKTVVPV\*

>SPBIB\_v1\_340005|ID:27163920| Csd1 family CRISPR-associated protein [Uncultured spirochete bib]

MILQALKEYYDRKAADPESTIAPPGWELKEIPFVLVLDGTSLVQIEDTREGQQNRGKKF  
LVPQAEKKTSGIKANLLWDTPAYVFGIQDLEGLFEKEKERKRQLPQQRAAFLDRIRNDL  
PDTAKRKALISFLENATEEHLSEYSHWPEILKTNANISFRFLDELDFYCRSQAIAQAVNA  
KLHSRETNGICLVTGENDEICELHNPICKGVQGAQTTGGNIVSFNLAPFCSYNKKQGTNAP  
IGYMSMFAYTTALNSLLSKESRQLVLGSAATVFWSSSEKTDFFENDFSIFFSEPPKDNPD  
VGTENIRALLSPLSGGYRNDTGNEKFIYILGLSPNASRLAIQLWLPGTVSSFKDKIAQHF  
EDFNVEKRESEPRYYSLWRVLTNIVPQDKTDNIPPLVHQFMYAILTGTPYPQSLLQSAI  
RRIRSDAEDRVTPVRAALIKAYLNRYIRYYSKNTEKELTMALDIEQPSIGYQLGRLFAVL  
EKIQEEANPGINATIRERYYGSAACSSPVTVFPTLMRLKNHHLAKLGNRGRVYFERFIGG  
IVGKIDDFPSHLDLHEQGRFAVGYYHQRFDFTKKD\*

>SPBIB\_v1\_340006|ID:27163921|cas| CRISPR-associated protein Cas5 [Uncultured spirochete bib]

VKGFCLEVWGDYACFTRPEMKVERVSYDVMTPSAARAIFEAILWKPAIRWHITRIEVMNP  
IQWVSVRRNEVGCIFTSPTKAQLLGANGDPMGFYIEDNRQQRASYFLRDVRYRIHAWFEF  
IPESRKTNHSVNQEIWADIEEKATYERKDENEAKYAAMFERRAKKGQCFHRPYLGTREF  
ACNFMFVEQPELAKPPLSLNQDLGWMLYDMDYGHPENPIPRFFRAKLENGVLLTDENIVE  
VRS\*

>SPBIB\_v1\_340007|ID:27163922| CRISPR-associated helicase Cas3 [Uncultured spirochete bib]

VL YIKLPKLISKADWVVAQAQKTGENDQEITMSEKDTSCMQAIAHV RKNPDGSWAAPHSL  
QEHKNTATRAAKFAESFNSEWARSCGILHDAGKARDEWQLYLRRKSDYWEDEANLKN  
SNRIEHSASGAKYAEVVLGKIGRILSYCIAGHHAGLPDLEGDNSSLLNRFEHAKTEDIQ  
CWYKDSVIRELPDKKHLSPWKLNQEQQSILMSLWIRMLFSCLVDADYLDTESYMEPER  
VSSRGKYPSLSEIKTRFDDFIKKIRDSLAKGDTVPVQIRRHVLDQCRLAGSWEPGFFSL  
TVPTGGGKTLSSMAFALEHAIHKKERVIVYIPYTSIIEQNANEFKALGNDAIIEHHSN  
IAEDVDTGKARLAAENWEAPVIVTTTVQFFESLFAAKPGRCRKLNHANSIVIFDEAQLV  
PPEHLKPILETLDALVAKFRVSAVFCTATQPVFEKQKDFPSFPGLSNGKVREIHKDVPSI  
FSAMRRVAVKIPEDLSTPLSWEKLADALKKEPQVLCIVSDRRSRELHALMPEDTYHLSA  
LMCAQHRSEVINEIKGKLRGDQVRVISTQLIEAGVDIDFPVYRAIAGLDSIAQSAGRC  
NREGYLNASGKLRVVLFIPLPPQGILRKASETTLILLKQGLSDPISHEAFKAYFSEL  
YWKLNSLDLYGICDLLYPQPPALGIMFRTAADKFRIIDDSAMKTILIPYEKGASLIRELK  
QIGPSSRILRKLQRVTVNVYANQFERMRARESIEEIFPRIFVLRESCMLEYSLKVGLLAD  
DVPNDPQLFIG\*

>SPBIB\_v1\_340008|ID:27163923| conserved protein of unknown function [Uncultured spirochete bib]

VSQMERIFFIDRTIQERGGVNVRTVSSTFEVSERQAKRDIEYLRYL GAPVEWSAPKRQY  
IYSAPWDGLKFASEKSLFALAFFRAILDYRYSYIPVLSEELIDELKRKIGARYASIAEHVR  
YELPDLQPISDDISYRICRSLLEQHNLRITYRDAHDVESERTIVPLRLINYAGKWYCAAY  
DSLSGKLRVFAIARIKEAYEAEPHFPLPGDDEIERFLSSSYGIFKGDPVGTATLFRNG  
AARAIRDQIWHPDQVLTIPDNAGDEYTVDSLPLVHDWTELLGRALRCGADCEVLGPQEFR  
ERWKEEIERMREMAGKGD\*

>SPBIB\_v1\_340009|ID:27163924| Sodium/hydrogen exchanger [Uncultured spirochete bib]

MSRKLLIAGLALFALALPVFAQSEQSTPTEQITQFVFLAVIIFAARLGGIAAKAISLP

SVLGELIAGILIGPFALGAIPLPGFPAGFFPVSGGEPISIMLQAFSNIAAIILLFSSGLE  
TDLMLMKYSLAGSVVGGIGGVVFSFLFGAELGTFTHQPLFAPVNLFIGIMSTATSVGIT  
ARILSDRKKMDSPEGVTILAAAVFDDVLGIIFLAVVVGIVAVLEGSKAGGLSAGAILGIS  
AKAFGLWLSFTALGLIFSKQISAFLLKIGGEGHFNILALGLAFFIAGIFEMEGLSMIIGA  
YIVGLSLSKTELSFIIQDKTKVLYELFVPIFFVVMGMQVQISKILEPSVLIFGLLFTLVA  
ILAKVLGCGPLSFLGFNKGALRIGVGMVPRGEVALIAGIGLSAKILEPGFFGASILM  
TILTTILAPILLNILDKGGGRGTRKEAKTTTSEEFVVELPNADLAGLLSSYLLEDLQREG  
FYVQLMSISDDISHIRKGDVSLSLKVDGSKLILEAVPEDMPFVRIMVYETMVKLDANLKD  
LKETYDPESMRKTLDVETIRKDPTRKILDPOCIEVDMKATNKEEAIVELIELLDRVHHL  
KDKNKVLADVLEREKIMSTGMQHGAIPHARTEGTDKPVLAIGIHKKGIDFQIDGTPAH  
IIALIASAGDPAPHMQLVTLGSLGSDIVREQLLHAKTREEAAKILGV\*

>SPBIB\_v1\_340010|ID:27163925| Pseudouridine synthase [Uncultured spirochete bib]  
MKKHVWRQMCHQGWRTLPAAHTFFLRAFFCYDEVYMLSILFEDDEILVVDKPAGLPAQPG  
EGVKDDVVGVLERQLGYKPFVHRLDRDTAGCMMLAKTKAAAAQWSQLIASKDIVKRYYA  
WAAGEPQKKNQVIDAALDGRKGAQEARTFWSLKEAWRLADAQAVSLELELKTGRMHQIR  
RHLAAIGLPILGDDRHGDFALNKALRRFGIRRLMLWAYMLMLPGGTIVRASLPPHFAAFK  
EMLARSGAIQQ\*

>SPBIB\_v1\_340011|ID:27163926| protein of unknown function [Uncultured spirochete bib]  
MRKPFELAMGAWWIVPDGRTIAVPSFHESWLASHPAIASGCLHTVDFVQKSGWLSVTLYS  
EGMIEIISRDISDARQREAIHQLFEMNKSLIKKIVVFQPSIEGCLTAEGPLVASWERFVA  
ELDGLARALPAAQVSSEAEPLAKGLPAAEALPAARASSEATPAAQQE\*

>SPBIB\_v1\_340012|ID:27163927| conserved protein of unknown function [Uncultured spirochete bib]  
MHIGNVHIGTCGFSYDEWKGQFYPADLPAHEMLRYYSLVFSFVELDHTWYRIPSPAQLER  
MALVTPSDFRISLKVHRSLTHEVDEHWQTHAAEFCNAVSAALASTGRLGCVLVQLPYRFSY  
TPENRKYLANLLATLAEFPLVVEFRNATWYQERVFDALKARNVALVVDRPDLPLPPES  
VIITSDICYRHLHGRNADLWWSGDATSRYEYRYSQELKDRARLVRAMSRQAKTVFVAFN  
NHARGNAPANAAFLQSILAEQQA\*

>SPBIB\_v1\_340013|ID:27163928| conserved membrane protein of unknown function [Uncultured spirochete bib]  
MIFTALARIVSVVISVYMLLCAVRIFFSWVPSLAQTKWGSLIARLTDPYLELFRAIPLFR  
TPTVDFSPIVALAVLSVINNLVFTLSYAVRITVGFILSLLLDAGWSAISFLLGFFLVIAL  
VRIIGYIAKLATLHPLWQILDGIINPLLFRVNRFIYRGRAVDYLQGLITGFVVVLLARAI  
GGWAIRILTSLLMSLPF\*

>SPBIB\_v1\_340014|ID:27163930| conserved protein of unknown function [Uncultured spirochete bib]  
MLTSKQRSMLTALASKDCVMQALGKNGLTAQFVATIDGLLAHHELVKIKFLDFKDEKRG  
AEELAAARTKSELVRVIGHNAIFYRQNPDPKRRINLA\*

>SPBIB\_v1\_340015|ID:27163929| protein of unknown function [Uncultured spirochete bib]  
VRICRAAHRKPSRFLNRGLTPFLKFFDLCKVDAALFGVGVLA VENGIVADNADKLGLGSS  
GQFLGYSALFVLKIEKFYLYKLVVSQKSIDRSDKLSGQAVLAERLHHAIL\*

>SPBIB\_v1\_340016|ID:27163931| Major facilitator superfamily MFS\_1 [Uncultured spirochete bib]  
MSVPLSSQKLSKARSTFNIFNLSFSFVFSVSGSIITLALRMGAQNSIIGLLNALVYIT  
FFMLPLGKRLVRRTSIIKIFGWGWVIRYIMLLPILFAPVLASKGNMGLAILLLIIGTAGF  
HISRGVAMIGNNPVLGLLSSGGGDKPRSDQGRYLVNVSVVNSVAAIFANIVLAFLGQQA  
SLWTYAIAIGIGILSGLLGCVFLFKVPEPEFSFNNEQSLWNVTREALLKPEFRAFIFTF  
MLLSFSLGMGRAFLPVYAKEVFAQGDDAIMVYSIVAGLGSIAMGLITRLVVDRLGSKPLF  
IIYSMIGLISFLPIALIPGSGALMGAPAIIGLFLSVVHFLSSFGFAGEENAGQVYYFGLV  
PKEKMLDLAVIYNLAYGIGGSLGSLGGLLEIFSNVGLSQAGSFRLYYALISVVLVFI  
YSMRNLPHMGAKSVGQSLSVLFSPRELRAFDLLTRLDQSASAHEEVRILQELGKSESKLT  
QKELVEYLHSPRFEVRSEALLALESIPELDAETIGALIREVRTNVYSTAYVAARILGKQR  
SDVAIPVLIDSLKEPDYMLQSMAMIALARLARGARQAIPEIEEVIRSTENPRVRISGAYALE  
LFGSIDSIPSLISCLKAEDRPANVSDELVLAISGILGIDKEFYLLYSEFIDDAKSGVAQL  
TAHAHDVPLEKERLEAWMAAIQELFAAKPNPIPLARLLLNTTRITGSLLLSDALLDPKL  
EYPGFNFLCAYVALHTENLRDF\*

>SPBIB\_v1\_340017|ID:27163932| MATE efflux family protein [Uncultured spirochete bib]  
MKDLTKGDEATTLITFALPMLLGNVVFQQFYNMVDSFVVGRFVGTNALAAVGVAFPVIFLL



VALIMGITMGSSVLISQFFGARDRERLASTISTSYIFLFGAGIFMSVLGFFSVPFILNIL  
AVPPEIYAEARSYMSIILGGMLITFGYNGVSAMLRGVGDSKTPLYLLVAASLMNVVLDLV  
FVIVFHWGVAGAAWATLISQAFSITAMVIFNRTESHMKVELKKLSWNKEIFGSMIKIGL  
PTGIQQTLSLGMMLTRIVNEFGPATMAAYTAAARIDSFASMPAMNLSQALMTFTGQNM  
GAGKTERVKKGHRAAIMNIVISLSITLLVTLAGHWLIGIFTTDGAVIDIGARYLLIVGF  
FYIIFGTMFINGVMRGAGDVFIPMISSLLALWIVRIPCALLFTKVFGMGSDGIWWSIPA  
GWFVGVFVFTTWYRTGKWKTkVLRPPPLAEEIE\*

>SPBIB\_v1\_340018|ID:27163933| MazG family protein [Uncultured spirochete bib]  
MEIDTIPLLETLAGQMSEQILPEAEQAAAFAKLFFTIVARLRAPDGCPWDLAQTPTSIRGN  
IEEAYELAEAITENDSAHIKEENGDLYLLATMVGYSQEQGRYHVADALREAARKLIRR  
HPHVFGDSTVDSPEQVVEQWNDIKERIEGRRKKDSLLDEVHRHLPPEKAYKIQKKAACA  
GFDWQKREDIWLKLAEMEELKTAAGNAESAGADSAGAEPAVGMESAGAASSVRKAPIAN  
PDALIEEFGLDFTVINAARLYGVDPMLALHRSNEKFSRRFRHVEARMKASHLAMTPEHM  
TQMDAFWDEAKRAEDGARADNARRAEDSLRARGTQPTEHAQPASRLDIPRSRP\*

>SPBIB\_v1\_340019|ID:27163934| membrane protein of unknown function [Uncultured spirochete bib]  
MEQAYSQSIEHTAAAMRKENKHATPIDASTMNLQKSGFFFFSVASLFLVLYSIIVILLP  
DTAAIPRYPPEMLFLIGLFAIGFLASIIAELVWLEPVLLLAFLPLHLSDHITSMYSMCA  
FIIAIELYRIDYFKTGGLAKIFLCFAYYALSIALVGTALRVFFVEIAMPIIFIFLFFLY  
LLPVFKGKWQIRIARPRQTIHYKELNLTRETLDYLKECLHGAAFKFKEIAAHHHVSESTVRN  
TFAHIYHKFSVTDKAELLSKFADFDIID\*

>SPBIB\_v1\_340020|ID:27163935| membrane protein of unknown function [Uncultured spirochete bib]  
MIDAWRAFLQCRQVMSILKIYKWTVACGFLVALLLLPSQIFPKTPRGMLELDKIVHGF  
LFGVVTAVFCAEHRRWTKVSPFFLLSFAIIGAFSFLTEVSQALATKTRHFDLKDFGADLIG  
IAAGLLLMRLIARLTQK\*

>SPBIB\_v1\_340021|ID:27163936|ydbK| putative 2-oxoacid-flavodoxin fused oxidoreductase:conserved protein; 4Fe-4S cluster binding protein [Uncultured spirochete bib]

MTNSKNMVMIDGNAAAHV AHACSDVIAIYPITPSSPMGELADEFSSMARKNIWGSVPQV  
VEMQSEAGAAGAVHGALTTGALSTTFTASQGLLMVPMNYKIAGEATPTVFHIAARAIAA  
HALSIFGDHQMTRQGTWALLASNNVQEVMDMALVAHAATLKARVPFLHFFDGFRTSH  
EVSKIEELSYDVIRAMIPEDKVREHRARGLNPEHPEIRGTSQNPDVYFQGREATNKLYEA  
TPAIVEETMAQLAKLTGRTYNLFYAGAPDAERVIIIMGSGADTAEEAEYLAKQGEKVG  
VVKVHLYRPFVVEHFIKAIPATVKSIAVLDRTKEPGAIGEPLYEDVRTAIGEAMGKGTGP  
FKSWPMVVGGRYGLGSYEFTPAMVKSVDNLKAEQPKNHFTVGVDDVSFTSLPYDESFH  
LPSEGVVECLFYGLGSDGTVGANKNSIKIIGDETDNSAQGYFVYDSKKAGTYTISHLRFG  
PKHIKPYLVTKADFLACHKFSFLEKIDMLANLKEGGTFLNPSYSADEVWDNLPVEVQK  
EIIDKKVRFYVIDAMSIADKSGMGRINTIMQTAFKISGVLPEAQAVELIKKYTKKTYM  
RKGADIVQKNLDAIDMALGATHEVKVGKATSTKHMLPPVPPSAPEFVRETLGEIIAQRGE  
KVPVSKIPLDGTFTPTGTTQYEKRNIAEKIPVWEPSICIQCGNCTMVCPHAVIRMKAYDPA  
LLANAPATFKSADGKGKELAGLKVTVQVAPEDCTSCGACINICPAIDKANPGRKAINFGP  
QMELRETEKANWDFFLSIPETDNKFLNLSIPKGIAMKRPLFEFSGACAGCGETPYVKLVS  
QLFGDRAVMANATGCSSYGGNLPPTPYTKRADGRGPAWSNSLFEAAEFYGMRLTTDK  
QAEYARELLDTAKTNGVPADLIDRILANAQENEEQIEAQANVAELRKALASKKEDWAKE  
LDNVADALIRRSVWVGGDGWAYDIGFGGLDHVIASGKNVNLVLDTEVYSNTGGQASKA  
TPIGAIARFATSGKDIFKKDLGMIAMSYGYVYVAQIALGANMNQTIKAIRESYNGPSI  
IIAYSHCINHIDMMKGMQKIAVQSGVWPLYRYDPRLKAEGKNPFQLDSKEPDYSKLE  
QYMYAEVRFKSLVQANPERAKMLLEKQRSIERRYKEYRYLADRPF\*

>SPBIB\_v1\_340022|ID:27163937| dTDP-glucose pyrophosphorylase [Uncultured spirochete bib]  
MKLLVLAAGIGSRFGGIKQLAPVGPNGETLLEYSLFDALRAGFSEIVFLVRPEIEEDFRT  
MVL SRLPASVQWQLAYQTSTSMLEKSIVRARENGRIKPWGTGHALLCARAQLEQSGPFA  
VINADDFYGPRAFAGVQANLANPQEFCAFAGYRLDDVVPQEGVVSRAICTIDADGLLGTI  
VEHKRVWRRGQEFISEIDGKQYVLDPQTVVSMNLWGLSEIFA WAERMWRDFLSEpanyg  
SKEFFLPDIVNAMVAHGAVRVRMIPASMRSGFLTNPGLDLEETRERIARMIAGDYAPLW  
RGK\*

>SPBIB\_v1\_340023|ID:27163938| putative UDP-N-acetylglucosamine diphosphorylase [Uncultured spirochete bib]

MSDFPRLWNIEESEFADLFAQLEAPWEALHSLDGYLASLLQKADVSGQVVLSPVPEGVHI  
EGLVYIAEGCVIESGAFIRGPAWIGAGCEIRSGCYIRGGVIAGSGAVLGHASEFKHCILL  
SHAQAPHFNYYVGDVSLGIHAHIGAGVILSNYRLDGGKVPVVRAMGAGERIETGLAKFGALI  
GDYCEIGCNTVLPNGTILGAQSVVPLSNIRGTWPPGSRLPG\*

>SPBIB\_v1\_340024|ID:27163939| conserved protein of unknown function [Uncultured spirochete bib]  
MSIPHFAGKFFSKPLFNPTDFLAYLERIGKPLSHRPAPDAVILSYQKSLFDHVVEHYVPE  
RAQGYFGQFIYYLDGPRNIPQTRRQLAIAAGFGVGAPAAAVMLEELIAWGVVDFVSMGMA  
GSLREDLPPGSIVLCDASIRDEGTSYHYLPDDSDVFPDRALTEKLADELSAAGLPFARGA  
TWTDDAIYRETPVEVEYFRKKGALVEMEAALFAVAHRDARIASCFSVSDTLAYLEWK  
PEFHSEATRETLEKLFRVASDVLLR\*

>SPBIB\_v1\_340025|ID:27163940|sudB| Sulfide dehydrogenase subunit beta [Uncultured spirochete bib]  
MHGTHRIVSKTQLSEEVFRIEVEAPLVARERKAGQFVIVMYDEEYSERIPLTIADADPVR  
GTVTLIFQTVGASTHKLALKNPGDEIVLLGPLGNPHTIERFGWAVCVGGGIGLAPLYPIA  
KAMKEAGNRVTVISGARTKDLLIMQKELVAIADEHIVVTDDGSFGRKALVTEPLKELCMQ  
SPPPDIVVTIGPPIMMKFCAETTRPFGVKTLASLNTIMLDGTGMCGGCRVAIGDQTKFVC  
VDGPEFDAHLVDWNGMMMRLGTYKEIEKEAHRCHLEMQIAKLEAHAADKESAK\*

>SPBIB\_v1\_340026|ID:27163941|sudA| Sulfide dehydrogenase subunit alpha [Uncultured spirochete bib]  
MSHKEDFTMDNAELELAKLRAAPITPKIRLQIPPQDMPAQDPAARRSNMEEVALGYTPAQ  
AMLEAERCLQCKNAPCISGCPVRIDIPGFIGIKIEGDFLGASKIHKTNLLPSICGRVCP  
QETQCQAPCTVGKALGGVEKAVQIGRLRFVADYERAQGAMEMPHVAPPTGRKVAIVGAG  
PAGLTCAVDVRREGHEVTIFEAFHKPGGVMVYGIPEFRLPKVLVQSEAEVLECMGVDFEL  
NFLVGRTRPLRALMSGDYDAVFIGTGAGLPKFMNIPGENYVGVFSANEYLTRANLLKAY  
MRGMAGTPIYPSRRVAVLGGGNVAMDSARMALRLGAEVRVLYRRTREEMPARAEVAHA  
MEEGIIFFDLKSPTRVLGDDRGRVAALEVLSYELGEPDESGRRRPVPIRGSEQIIPFDTV  
IVAIGNESNPLISHTTPELQVDKHHILVDEKQKTSIERVYAGGDIVLGAATVILAMGEG  
RRAAQAINELQ\*

>SPBIB\_v1\_340027|ID:27163942| putative Tetratricopeptide TPR\_1 repeat-containing protein [Uncultured spirochete bib]  
VSRGRLIPLRFFSLFLMLSSIVGGVQQLWAEDTYNAALSLFWEGRRLEMAETRQAESQQA  
FQRSLAMTERLLATDAANPDLQTLKTNLFRLLRYVDTVVYAQSVLNSRQDYRILETMAE  
ALYFLGKNDEALSAFSRYFTLSPENDDRRSSAYYYVGEIYFRIKKYEHADIAFSTAVALE  
KNMYYYWWYRLGIVKEVLGQYRAYEAFNTSLSLKSNFKPALDAKERVKAKSSL\*

>SPBIB\_v1\_340028|ID:27163943| putative p-aminobenzoyl-glutamate hydrolase subunit B [Uncultured spirochete bib]  
MTKNISENRACSADLAVFVARNAEVYDSIARDIWEHPEVSHEEARSSAVYRERLAARGFR  
VQEFPEMPYSFCAEWGESGPVIAFMGEYDALPGMSQACATERQPVVAGAPGHACGHNLLG  
MGSLVAAEGLVFLSQTGMRRARVRFYGCPAEESLGRIPLVKAGRFNDVDAAMTWHPADVN  
TPHRYRTSANLSFVVSFQGKASHAGMAPHAGRSALDAVQLFNLSIEFMREHVPPGTLFHY  
VISDGGAKPNIVPEHASVHLYVRAPDAQSVHEVMKRVKAIHGAELMTETKASIEIKAGK  
CDFIPNTPIQDTILEAMTAIPLPEPTPEEIEFARELQKKVAPADRQATLAPIGAPLSLLK  
QPLHLEVGDGEGKRIGGSLDTGDVSYVPTGQMNAATWPLGVGAHTWQSCAASGSAWAM  
KAARYAGASLAYAGFLLVSKPERLARAKDEHRSVPTYRSTMDY\*

>SPBIB\_v1\_340029|ID:27163944|mtaD| 5-methylthioadenosine/S-adenosylhomocysteine deaminase [Uncultured spirochete bib]

MQPENPLDRRPVLLPDL CIRGGA VLTLD AKWRIFDPGFVAIKDSRIVAVGHLAEAEQWPA  
RETLDVSGTLIMPGYVNAHTHISMSPFRGAMEDAPDRLTRFIFPLENAMVRSKLVYDAAM  
FTIAEMVRSCTCFADMYFEEVVARAADAAGVRALAGETVVD FPAPDADRPYGGIERAE  
HLAKDWKGHPRIRPCLAPHAPYTVDASHLAEIAALAEKLDIPVMMHVAEMDSEHARFSAT  
HGSVLRYLDTTGILSPRLIAVHMLYLDEEDIALAAKRGISVAHCPVSNKSGRPICPAWR  
LSEAGVSVGLGTDGPLSGNTMDMQTITSMYPKLQKVREHRRDIVPARTALYAATMGGAHV  
LGLSADIGSLEEGKRADIQVVALDDFNVLVPHDWAYATAVYALQAHNVRDVLVDGRFVLRD  
GKLQFADERELKERLLYHARQSAATIRALQPAMPHHTAGT\*

>SPBIB\_v1\_340030|ID:27163945| conserved membrane protein of unknown function [Uncultured spirochete bib]  
MIHFIAGVVTSANYWFIVLRSTAPILLVTLGAVITAQAGIMNMALEGSMLWAALTGVIVS  
AATQNVWIGLLAGIGASVLVALVLGLFALKLHANPVLSGVALNLVATGGTVFVFLSLTGD

KGISSSLASKVLP SLSIPVVKDIPWIGKV VSGQNVVYIAAVSVVVIDLILRRFAIGRRI  
RATGENVEAARAAGINPVRIKFFTLIISGILAGFAGCFLSMGYTSNFTSGIAAGRQYVAN  
AAQVVAGGTAVGSIFAAMLFGLTDAMATYLNIGNLMP ELIQUALPYAVTILGFVVVTFVRD  
RREAERKRKLFAGTAMQKEKADAA\*

>SPBIB\_v1\_340031|ID:27163946| ABC-type uncharacterized transport system, permease component [Uncultured spirochete bib]

MNSIKRFFTDRESLAPALVTLFAGLFSLLAGIVLIFIVSKNPVQSVRNFL LAPFLRSYNF  
YYLLIVMVPITFTGLALCIVYQLRYMSLIVDASFYTGAVVATALGTLISLPSGVHPAVAM  
IAAGIVGGLIGLLPAILKIRWRANELVSSLMLNYVFYFLGSFVILYYLRDRSQTILSSLP  
FKKTFLLPRLVANTQLHVGFLIAAGFVVLVSIFLYRTRWGYEIRLTGANPRFAMYAGIPV  
TSVILYAHFISGFLGGVGGAVEMSGLYRAFIWQMNPSYAWDGVIVAMLARRNPKFVPLSA  
LFFAYLRVGADFM SRRGDVAFEFITLLQGLIILASDRIVNYFRERQLRKQLLKNSRRE  
SR\*

>SPBIB\_v1\_340032|ID:27163947|yufO| Uncharacterized ABC transporter ATP-binding protein YufO [Uncultured spirochete bib]

VNYIVRTEKLSKIYPNGTFANKSVDFAVMEGEIHGLVGENGAGKTTLMKMLYGEEQPSQG  
SILIDEKPVSLASEFDAIKAGIGMVHQHFMLVPSLTAENLVLGKEPKRKRTRTFDLAAA  
VSITEELSKHYNLPVFAKARVADLSVSMRQKLEILKALYRGARILILDEPTAVLTPQETE  
ELFVELKTLKQQGKTIIFISHKLKEIFNLCDRVTVMRDGRMIATHNVADVDVHQISNEMV  
GREVRFEIARPPMAPGEPALRVRELSYVDDFAIPKLKHSVFTLRRNEILGVVGVVDGNGQT  
ELVEIITGNEKALSGKVFA YSTEVTNRSAGFVRRCGIAHIAEDRMTVGTALPASIEQNL  
ADRYRNRQFSTRAGFLRSREMAAYAGRLVHEYDIRCNSANQPVASLSGGNMQKV VVAREF  
TANASILVISEPTRGVDIGAIEYIHTKIMEMRSAGKAILLVSSDLQEV MALSDSLIVMHE  
GEIVAYFPDAAA VTDKELGLYMLGIKRQSDEELRKVLHE\*

>SPBIB\_v1\_340033|ID:27163948| putative CD4+ T-cell-stimulating antigen [Uncultured spirochete bib]

MKKLKVVVLLLIAAIFLPSTAQTQKKANVLLISGSLGDKGFNDSARGALDMIKQKYGA  
NATVKYTELGTDVAKFAPALEDAGAEGYDVVFCSSNNFN SA VQEVAAARYPKTLYVMYDGWI  
KEDIGNVYSIQYKNSEAGYLAGALAGLMTKYTADPKINADNVIGFVGGRDITGINDFFVG  
YIAGA QKMNP SIKIINYVNSFTDTAKAKDQALVQYKSYNADIVYHAAGRAGLGVFDDAAV  
ETGKYAIGVDTDQASLFGNEPKKADLILTSTMKRVDLTLFQAF EKFMNGEKLGGKKVYVG  
AAEGVIA YAPFNKAMPASIKTELEKLQADIKAGKVSIPS AFSMTADEINKMRDSVNAAK\*

>SPBIB\_v1\_340034|ID:27163949| Peptidase M20 [Uncultured spirochete bib]

VLPTLCRMNCFGA AKYIAWTKGAGYGDVMNISELKTAVDAEILSQREETIKLAFRLASIP  
EAGFEFETMKELERQLAACGVKAEVGLARTGIRATIGPAGAPNLVLLADMDALPTRGAP  
NDIMHSCGHHAQMSIMLAVFSALHALGIPEKLGFRSLV GAPAE EYTHLDERKALRVKGE  
IRYLSGKQELIRLGVFDDAACVIKYHSMADSPERMATVNGTLNGFVAKQALFVGKAAHSG  
AAPDQGVNALNA AVIALMAIHSQRETFRDSDHIRVHPILKEGGTTVNTVPDRARIETYIR  
GASIEAIQNAARKVDRALGAGAMAVGASVTVSTTPGYQPFRPSDALGVRLAASAARFLPE  
TAIDLHDYSYASDDIGDVACLVPACQLGFSFGSGTIHSADFKASDPERAYILPGRILADL  
VLDLGADGGRKAQEIRSAFKPTLDKAA YLA YLDSCFEEKTYSFKD\*

>SPBIB\_v1\_340035|ID:27163950| conserved protein of unknown function [Uncultured spirochete bib]

MFKAVIFDFGNVLCGIDRESFVRKAAQYTSKMSADELLRALWGTQLEFEFETGRFDSHEY  
FRRVQEMAGLGPSYSYEEFVEDYKRIIPNP DGEKGL E TAAKLGMRTFVLSNTSFLHASV  
IFDNEILGTYPELYILSYKVGAMKPDPRWLKLEYARLDPADCLYIDDIEQY CQAARSL  
GMSAFCYDFCIHNLSQVLNMLQ\*

>SPBIB\_v1\_340036|ID:27163951| Iron ABC transporter, substrate binding protein [Uncultured spirochete bib]

MKKFAVVALCLLIAVSAWAAGGKVVVYTAHEETIINALVPMFEKETGIKVEYVKMGSGDV  
IKRAKAEAARPQADV IWSIGGEQLEAENQILAPYTPKEWDKINPVYKVG TNWLPYTGIMN  
VFIVNTKMLTPDKYPKSWTDLMDARFKKNISSARADKSGSSYMQLCNVLSIYGDKGWDIY  
KGIMKNMVISASSGAVPKFVNDGEQAVGITLEDNAFRYFAGGGPV AIVYPTDGTVAAPDG  
IALLKGAPNLEN AKIFIDWCLSKPVQEYLVDAMARRPVRIDTKDPKGLVPLSQVK TIPYD  
FGWAAKNKDAFVKKFVDIAMELGL\*

>SPBIB\_v1\_340037|ID:27163952|fbpC| Fe(3+) ions import ATP-binding protein FbpC [Uncultured spirochete bib]

MASIQIIDLEKHFGEVKALSGINLEIDKGEFFTLGSPSGCGKTTLLRTIAGFYHQDKGDI

YIDGELINNVPA YQRNTGMVFQNYAVFPHMTVFDNVA YGLRVRKLPKDEISRKVSAAALKS  
VHLEGYEQRTPEKLSGGQQQRVGLARAMAIEPRVLLFDEPLSNLDAKLRIEMREEIRAVQ  
KALGITSIYVTHDQEEALVISDRIAMNQGVIQQIGKPWEIYTNPQNMFVA YFVVGKINML  
TMHLEEGAEGNLRRARLGRLLIPAEGTKDLQEVVVAFRPEDMVEAEAAGRKNEITGLM  
KTVSFMGSVARFELDVEGQLITVDRHRPREADMPQKGAPVAFAVPVESILLFDPKSGLRI  
GKGAQQ\*

>SPBIB\_v1\_340038|ID:27163953| ABC transporter, membrane spanning protein [Uncultured spirochete bib]  
MSQAAETRRGTATAPGNSGLPAGRSSLQHPGRRADFWTLVIFAGFAIVVFLIYPLFDIF  
RYSFLDKTTKAFSMSNWKEFFSKMYLRAFVHSHVIALLTFFSIVLGIPLAFFTTRYRI  
RGTNLLTTLVLALLSPTFIGAYS WITMLGRNGFLRLMFQSIGINLPPIYGPLGIVLADT  
LQYYPFISLMTAGALMTIDRSLEEASENLGARSVRTFFDITLPMIIPSVTGGALIVFMMS  
LSNFGTPMIIGGNLVLPTLAYNLYTSEISETPGMASTVSIILMLCASVVIVLQQWMSSR  
RKYASMLVNRPIVKQLKGIKSVVAHFVCYLIVFLSTLPLAVIVYYSFRKTS GPVFKSGFG  
LDSYRQIFFDVPKTVMNSFLYSLIAVLLIASVGTLLGFVIARKRNAAVRALDPLLMIYPM  
VPGTVLGIGFIVAFNRPPILAGTATIILTYFIRRLPYSVRSAA SILKQIDPALEEAGI  
NLGSPPGRTFR TITLPLMQGGIISGAIMSWV TSMNELSASILLYVGKTMTPIKIYLSVA  
DGYFGTASAMSTILLVVTGVAMFIVNKYFNRGSETFIAA\*

>SPBIB\_v1\_340039|ID:27163954| Fructose-2,6-bisphosphatase (modular protein) [Uncultured spirochete bib]  
MYPRFESKFSLSDEETTALQRLQADGEFFSVLDHSMSVFILRHGQSEGNARNTYQGR LDF  
PLSAQGEKQARAAGEWLSQFKPEIMLASPMQRARRSAEIVGEAAGISAIEFADMLIELDT  
GIFSGVDPDTAARKYPEIWNEFLARSWDAVPGAESSMLYARALCVWQKILELGQQGTSR  
IVCMTHGGLVQWLLKSTMGVH SWLPLL PMSNCGISEYEIEMVKKGNPAFVQWTAINFHPP  
AAPEGPKPVF\*

>SPBIB\_v1\_340040|ID:27163955| exported protein of unknown function [Uncultured spirochete bib]  
MRIRTAIAVA VCLLLGAAMQPFAFESGCEPSDPAFWAGI HGIPLDQDECAAIVGGDVRMS  
LNPDRTKLIVNVIDNEYEARLGRIPPKQVLELDVHNRI VNTTNAPFMPATRDGRELAAAV  
STTTKPSPFPEGYWTITAIKPRDDKYGPYFISTNAIGRVEVYENDGAGGQIPIGIFKDLG  
YALHANTNPFNVSKSYGCLVLRQDDVATLARILEADKQENPKAVQKILVPPSRARMRDW\*

>SPBIB\_v1\_340041|ID:27163956| exported protein of unknown function [Uncultured spirochete bib]  
MKKNYFFFLFMAGIVVLFMLASCKQAKVTEKPLQTVPQQAASQPKTSESGAPHPEAATKM  
PAIERKNESILLVYKHTGFGYVESYGFDTYVFRLADPSGQISGGIVYQRTSDGEVEAIH  
YNVTRSSDEITLAASGADKKSWSATLKLKDS SIDVSGQQKLSAKLDKALVFASTDGN YSE  
SYSIDQAAPEMPSEIKKGDSTLEKKGK WTFPENNKAMYVQTKPDDTENTEGFQVSLWREDN  
GDLRFRTEGPTPINEVYASGLSAVL AGDHALSNAVLLDLMLGESRYLRPVYAF AISRRGA  
GK\*

>SPBIB\_v1\_340042|ID:27163957| deoD| Purine nucleoside phosphorylase DeoD-type [Uncultured spirochete bib]  
MSIHIAAQKGQIADKILLPGDPLRAKFIAENYFENPICFNQVRNMLGFTGT YKQQLVSVM  
GTGMGMPSLSIYVNELIREYGVRRILRVGTCGSMREDVKVRDIVLAMSASTDS AVNQVRF  
RGMDYAPTASFTLLKAAWDAATARALRVFAGPVLSSDMFYTEDPEQWKLWAKFGVLAVEM  
ETAELYTLAAKYGCDALS VLTISDHLVTGEATNAQERQLSFRSMMEVALVAILA\*

>SPBIB\_v1\_340043|ID:27163958| protein of unknown function [Uncultured spirochete bib]  
MLFSVGNLVT LAIVVAMFGAYHLLTADNRSLEKLRMGEKLDKDELGAYVESKAEEIKHYG  
IDL DVQQKAAKVVLEKIQAQATIDSESE SITAIDRFKEYDEILSQLMDMTKRVDQ NIA  
HLAEKNEFIEALARRLEVAGKKMDAIEADLPKVKDQFAQDAKRILDGFRDDILDQLNERL  
TGIVNLF DQSKGDAESAIAQASALNNQIDQKTELAL EKAASRAQNI EDEAFQTLRARLAA  
DFKELSRQTDEQIAALSQKLDMLVQSVQAKLGETNASTE AQVKESQRRLSEAKASIAAMS  
AEMVRIQKETAEASAALAAKFQAERASLEE QFAQFGQAFEAHRASFEKEFMSEISALRES  
LENAKTQAETLRAAAEGNVSAALNEFEQGIYKDLDSHKA AVYEQVDKWLSSMDAKIRKIS  
QDAVEQRKAEEARLAQEVNAELKRIKDSLYTQAQKIERDIEALKNV\*

>SPBIB\_v1\_340044|ID:27163959|rpsU| 30S ribosomal protein S21 [Uncultured spirochete bib]  
VRTIRQVIVEDNEPLEKALKRFRMVEKEGIIREWKRREYFEKPSAIRNREKKALERKLM  
KKTRKSQEGKY\*

>SPBIB\_v1\_340045|ID:27163960| conserved exported protein of unknown function [Uncultured spirochete bib]  
MRPRYASLLSAVAVCSLILIFFAACGQNTSSQGIDKPNPKLKT VTLTIGEATVKA EVAMT

ETERNRGLMYRTSLRDGEGMLFVFDQRDQVSWFWMKNTKLPLSIAYIISDGTIVQILDLP  
YSEPRPSARSIRYALEVPQGWFRAGVKVGDKVAIPPL\*

>SPBIB\_v1\_340046|ID:27163961|def| peptide deformylase [Uncultured spirochete bib]  
MLNIVTYGDPVLTEKAQEISAFDHDLEKIVIDMQDAMKRDHGIGLAAPQVGISKRLFLVG  
LDDERLRIFVNPRIVAMSKETNEYEEGCLSFPLYFTVVRPSAIDIEAFDIKPKFRISA  
DGLLARVIQHEYDHLGILFIDRVSPAQRRLALAHYSRMLNM\*

>SPBIB\_v1\_340047|ID:27163962|fmt| Methionyl-tRNA formyltransferase [Uncultured spirochete bib]  
LRVLFAGSPEIAVPALEAIAASHHEIAAVLTNPDSKVGRGLKVEQTPVASAARRIFGERV  
PIFTFETLKAEARSGISACKPDILVSFA YGKIFGPKFMALFPKGGINVHPSLLPRWRGSS  
PIQHAILAMDSETGISIQTIAPEMDTGDLVSRIPGLGRETARTLSELCARLAAPLVVE  
VLDQIEHGTVKAQPQIGTPTYCSKISKEDGLIDWTRASREIDARIRAFDPWPGSYTFLRG  
MRLSILEAEPVDDFSPSDVPGHVTVNQPGTIIAVVAPKGMVVQGTGQGFVAVKQLQLATRK  
ATGYREFANGMRDLIGTILGLL\*

>SPBIB\_v1\_340048|ID:27163963| PASTA domain containing protein [Uncultured spirochete bib]  
MAKKDITQTIKEAASKAPEKVTA AVKSAVDIASEQHKRISSEWTKPQKRTFVLFALMFVV  
MIIFAVFVFFLTLKGEERTMVPDVRMDLADALVKMQQRELYPRLTLRFTDNPLDRNLVL  
DQSPPPGSIVKAGRRINLVSRGAVLKDIEDYSGRNIDDLRLYLQGLSTTTKGLVSIREP  
PLYIFDISAPGTILDQNPKEGTEISGPTILDLVSKGPEAKDIAMPSLLGLTLREMASKA  
ATTPLIFS YKMRAAHDKEAPGTVEQSEPADKNLQLDRVQITIAAPAARKGYTAGVFY  
TLPEYPYAVPVALDVIVPNGTRTTLYSVKHPGGSFSAFVSVQSGSVLVLMVSGAEVTRKE  
VR\*

>SPBIB\_v1\_340049|ID:27163964| conserved protein of unknown function [Uncultured spirochete bib]  
MNAQGEIPVEIIHLYTYDIGRAIDLKVASLVPAHHDMEFAKRRDTPVSLTLPKPLVLSI  
STDECDSKCFDKFSAQAKIYEDGAILIVRYKTMSRFEDLPQKANMLIRDISSANSIEQF  
AESSFKMVHEALRTAVAGYKELTKNDRETYTAFCLLECPGGDPRAFIDANKDVAASLLSG  
EPVGTLLHMSQIEQILNKPFSYRKDDIAIFDLERCLIDPAADYDDVIMMAEHANYRLIEL  
RELDLFLDKWLGAEQDIRRLYLSGNRRKFSRDLRLKLAQIQGLRFDALFTLENLDNSS  
KIIGDYFLGSIYHRLCEIFNTDEWKISIERLNLQNIYELVKNDS TEQRMITLELVFIA  
VCVIFPILQILQVMLLK\*

>SPBIB\_v1\_340050|ID:27163965| putative Beta-galactosidase [Uncultured spirochete bib]  
MQRAWNAGWYYRPGPAEPVFLSEEWAGPDAVAGAAKTDRGMTTTTGAAMAAGAATQDSP  
VGLPAAGWIPVHLPHDMIGAPLNSFDERTFARKGCYAKLLTMEQLARAWSDVDEASPKK  
ENLGQEAAPSEKDGAQPGA VVPVTPDKEDDFSPSSAHRSGAPAIFLRFEGVSVSCRVWVN  
GRLAGSHTGPYTPFEVRIDPHLKLEPEAPPSDRPAVPGAQPSARHNVRPAWILVEVDSSE  
DAGAPFFGGVVDYLVFGGIYRGVSLEVHTGAWVGTVWCAPRPLGDMLEGQWIAEVKVQIE  
AAEQLPPQAKIRAQLFSGNDLIIESAPVESPAGHAATKAKEVLLSLAVNKPRLWDIDDP  
FLYRLEVALLDESGRAVDMQEIRTAERTAEFGPSGFYLNHRRVFLRGLNRHQEYPYTYA  
MGPDARQRRDAEMLKQELGCIIVRTSHYPQSPYFLDACDELGLLVFEELPGWQHVGDSWQ  
EHALRDLRDMILRDRNHPSIVLWGV RVNESQDNHDFYTRTNALARELDPFRPTAGVRYIA  
HSELLEDVYTFNDFIYDGEPTPFISEPAKVLPKHHKKAPYLITEHTGHMFPTKSFQDEER  
LVAHSLRHAHILDTAMGNPRIAGCIGWCAFDYHHTKDFGSGDRICYHGVADMFRIPKYAG  
FLYASQVSPSERLVLEPASHFAKGERDAARMLPVYVFTNCAIDVYRGASLVGRFSPDKT  
HFANLPHPPVVIDDLIGKRIEAGWPGRDAALFCKLASKAMAAGASRLSLMEKLMGLFM  
HRRKLSMRQIEELVIRYGMGWGSADESIRLVGILNGKEVAERTFGADSTAQGLVAEADSN  
QLCAVSEEEWSSTRIVVRAVDQYGNTPFVFEFESIETEGPISLTGPSRLRAGGASAFW  
VAAGGLKGHARIIVSSPRFESPALVELEIV\*

>SPBIB\_v1\_340051|ID:27163966| protein of unknown function [Uncultured spirochete bib]  
VNGSMSESEFDAAKAQASAGSAESPGTDKPPITPQQFFDSLLLIEDFLRYGCRSGRKVEI  
SLPGDLPIETGLATRKAQLEALAAQVSECTACALSESRTQTVFGEVSDPEVLVIGEGPG  
AEEDRQGLPFV GASGKLLDKMLAAIGLSRQTNCYIGNIVKCRPPNNREPTPIERAACIGY  
LRAQIAILKPRFILCVGR TAAHGLLDLTDPI SRLRGRTFEFEGIPVVITFHPSALLRDAS  
LKRPAWEDLKRFRALIDGSTRVEE\*

>SPBIB\_v1\_340052|ID:27163967|priA| Primosomal protein N' [Uncultured spirochete bib]  
MSASFVRVAFPIPVVEETFWYRNPGFAPLEIGMRVEAPLGKRAKATGYAIEIADSVLDDPA

RIREILRVVDAEPLFDLEMLGLGKWLAAAMYHCSLGEALSAMLPSARRERQDLSEEFDEVE  
LSSSPLELTPGQRAALQGILAEPEGMFYLYGPTGTGKTEVFLQLAEAAALAKGQGVLYLVP  
EIALTRQVEQDARRRFGGSCAIIHSRLTPSRKLAEWRRIAKKEARIVIGARSAVFAPID  
LGLIIDEHDTGYKSGTTPRYHARQVAMHRASLAKARLVMGSATPSPEAWHACLQGGQIH  
RFDLATRPAGGSFPLIHIVDMRGREGLISDELAEALREAKTAGRQAILFLNRRGFARTLI  
CQTCGTEITCKHCSVPLTYHKSSGRLTCHYCGYSEPKLLACPTCGSLDLAWASYGTERIE  
EELRERFPDMSLARLDTDSAGTKGKLEETLRAFRNGQIDMLVGTQMVAKGLNFPGVRVVG  
ILMADQGLAMPDFRAAERVFLIVQVAGRAGRHRPDGLVVFVQTRKPDSPRIIRLAAAGDVL  
GFLERELEMRRHLEFPAGRLCRLVFRSRLAHDARNAESAARHLAEEPQFADIEVL  
GPSECPLAIIADNHRYQLIFRARRFQALQHFVKMLKPRIELPSSVYLEIDIDPVNMM\*

>SPBIB\_v1\_340053|ID:27163968|ackA| Acetate kinase [Uncultured spirochete bib]  
MVILTLNCGSSSVKYQVYDWDKDLASGIVERVTIGGSFITHKVRGRPDYEVEHECPNH  
IVAIELILKTLVDPEVGVISDLSMIKAVGHRMVHGGSKFAKSSIINGDFLETFKSLNELA  
PLHNPANLMGVEAAKTILPDVPHCAVMDTAWHQTMPASSYMYALPREWYEKYMVRRYGFH  
GTSFLYNAKRAAVLLGKDPFETNLIIAHIGNGSSINAVKNGCSYDTSMGLTPLEGLVMGT  
RSGDIDPGIIFHVMRKTGMTASEIEKKNKESGVLGLTTKWADRRDVENAAEKGDPIAIL  
AQQVEAYRIKKYIGAYYAALGHVDAIVFTAGVGMPEIRKLATHGLEELGIIVDEKKNLA  
LAKCRNAELDITGAGSKVRVFIPTDEELVMTEDTVALINGTYDVHTNYRYFENRDYVN  
KARAEGLQRDLEKKPWLKDIVARIP\*

>SPBIB\_v1\_340054|ID:27163969| exported protein of unknown function [Uncultured spirochete bib]  
MKKLIVLLLALAMVGAFAADAPKAVATFGAYLDSYGDFMDGLGPTLYSETYYNYSSGGV  
GFSATVTGGEDIFKQVRNYSVSYQVLPKVLVLAGRLRETGGARLTSYIDGNFSTRIANV  
QNGMMGQVSYQGVGLAVFSKLDLTLNTNVGLSYTAKGVAKLVGGYLGTSSEIWWGADIQA  
VKGVARVGRNTPTKNYIYATAGSSALVKNLDLGLDADIVLATGAFNYGAQVKAQYALT  
DKYSAGVKVWYDNGDAWYGNNGLAAKAYGVINFAQGDMVVGKYNAAATSTFSIPDFEVW  
F\*

>SPBIB\_v1\_340055|ID:27163970| exported protein of unknown function [Uncultured spirochete bib]  
MNITKRPSAGLPLYSVLGVAVISVMVSLLVFSCATARKYDPGAPKVAIARASDAEIAKYGP  
NFLVNPFKEPSIIVLGKTYDFYIVKISLNLDKQTKIKVIASSQGPSGADTPAAAYTQAEFV  
HFWDVVSNEGPNDEYERRKTTIERTVIPELSFSEGSGQNSYFLVFGKHPVKRPITYE  
VQVILDSGEAFVSETLE\*

>SPBIB\_v1\_340056|ID:27163971| conserved protein of unknown function [Uncultured spirochete bib]  
MPLQELILQHDVWYLTDAESMQEALGALVKTVDLPEGLDREALLDALLAREDLASTAIGN  
GIAIPHVRRFGSESLQHDIVVVAYLFAPVDWKALDGIPVHTLFLVLAKDEASHLQLLAEI  
AHVASDESFAFLKTM PDRAALVERIQKIEQLD\*

>SPBIB\_v1\_340057|ID:27163972|rlmE| Ribosomal RNA large subunit methyltransferase E [Uncultured spirochete bib]  
MAGYERPDYWTLKAKKEGYPARSVYKLEEIIVRKFGLLKGFGGRTGAGKEDSVRSPSSGA  
SGAGAPGPAILDVGAAPGSWSLWLLRQMKGAGRLVAVDIQDLGIAPADSNFSFIKGSILV  
DSVRARLREAGPNLVVSDAAPATTGNRLVDQARSEELVEAVMGLALEVLAPGGALVMKI  
FQGGEEKRLIAELKKHFAQARAFKPEACRAESFETYLVASGFARRDEQDKRL\*

>SPBIB\_v1\_340058|ID:27163973|htpG| Chaperone protein HtpG [Uncultured spirochete bib]  
MANYAFKTEVNQLNLITHSLYSHKEVFLRELISNASDAIDKLYLTVSDDAFKTLSEFP  
RITVTLDEDAKTITVSDNGIGMDEEELADNLGTIARSGTRAFLERLGENERKASNLIQF  
GVGFYSAFMVADHIEVVSLKAGTDKAFVWKS DGKSGFEIEPAVRAGFGTDVILHINDEGT  
EYLSRWSLEELLKRYSNHIAWPIHLVSKEKTYAKDPAKAESKTVDEQVNSASALWRRPKP  
ELTDKDYIDFYKSLTGDEKDPLLWIHTKAEGTIEYSSLLYIPSHVPADLYIPTREQGIKL  
YVKRVFITDKELQILPPYFRFVRGVIDSDDLPLNVSREMLQHNRMVMMTIQQATLKKLFSE  
LEQLAATNPEKFKTFISLFGVQLKEGILSDWTNREPLLKLVRFKSTLAEDWTSLADYKSR  
AGEGRKTIYYLTGENEARLRASPLLEVFKEKIEVLLGTDEIDELAFGGIGEYEGMQFKS  
VQQVDAEEELGKDQSEHKDRGEKAVKILKRVLGDVRKDVRLSKRLGKSPSCVVVDKDEFT  
PQYRKLMLERLTNEPAPEVKPILEINAEHPLIERLVALDTRKELSGGDLATVQEIEDLSHV  
LFYEAMLAEGEHFEVPQDFAERLNRLAKSS\*

>SPBIB\_v1\_340059|ID:27163974| putative Peptidase M23 [Uncultured spirochete bib]  
VPEGLRSWKEKEKRWYSRMVQGISSGLDVVRVAVRRFFSWGRTRFVFAVIPQSEKPARKL

ELSRFSLIAIGVAALVFAGSAIASISAYGAAALKASALHTQLAKANESIDKMRETTENLL  
SKTAQFQEKLQIVTIVQSKGKPDPAQSADNILKTAGLSDLIPGRFSDDPVS RDVLRLEG  
IAGTLDNSVAALDQIANVLASQKDIMTEVPNIWPIKGNLGHITMYFGQENENPFSTGQWYL  
HTGIDISTNRVGDVPLATADGKVIDIHYNASLGNSTITQHSHGFTTRYGHRLRGFAVKKGQ  
RVSQGDVIGYLGNTGKTTGPHLHYEVYLGTSLLIDPLRFLNIRKEYHE\*

>SPBIB\_v1\_340060|ID:27163975| protein of unknown function [Uncultured spirochete bib]  
MSKQGFSDCVIGQGVKAEGRIEAPGMVRIDGEFSGDIISGASVIISKDAVMHAHIRARDL  
LVAGFFSGTAIVQNEVRYVETARVRADCTGKMLVVEPGALVQGKFMNRNSDAQ\*

>SPBIB\_v1\_340061|ID:27163976| Stage 0 sporulation protein YaaT (modular protein) [Uncultured spirochete bib]  
MSDEYTDHNLPEEMFDILHEEEYETPKQSKAPPANAEELPQPIYRLKTLHSSETFHAYYV  
PTGSETHFMKQCDLEAALEGPRPQEKPAQSLEQCRVSLAVNTAEPSSAAQAVVAAAFIIP  
NRSLVIAPTKYGRDLVEVLGVVRDLSVVNADELVLIERPATVDDYRRYLENLEREKEALA  
KCRERIEAHNLPKLVSAHCLLEDGKILFFFTAESRVDFRDLVRDLVSLFHARIELRQIG  
VRDEARVTGGCGVCCGRILCCHGLSDKLNVPVSIKMAKDQNLNSLNSLKISGPCGRLLCCLSY  
EHQFYRDARRELNEG NRFTYDGT LFKVIEVNVLSNRIRIAGEDGRLLDMAARLKYADG  
HWTIIIEEQV\*

>SPBIB\_v1\_340062|ID:27163977| Cytochrome C biogenesis protein [Uncultured spirochete bib]  
MIATIAFGLLLSLVIQIVFLFKKEGGQDGISPWLSLAAGILLVEIVRRSIAIRFVALT  
GMFESLIFLACFLALLIFALRYFKSAKGNRVIPFGATIIVIFLALASSPLAPSDIKPPI  
PALQSGWLVLHVSFTFIGEVFFAVGFVSAILQLVSKDEEKRRSYDRITYTSIAVGYPIFT  
AGALIFGAIWAEKAWGVWWSWDPKETWALITWLTAYLHFRLVRKSTSKLVPALVIIGF  
VIAMFTFFGVNFKLGLHLSYA\*

>SPBIB\_v1\_340063|ID:27163978| membrane protein of unknown function [Uncultured spirochete bib]  
MKAFFDKLYNALRSVKLAVVLLVLLALFAIAGGIIPQGKAASYIEHFSGAGSRILALA  
LDHVFSFLFLLVSAIFAINLTVCTFHRLTNELFKPREKRRHGPDLLHIGLIILLFGGIL  
TSRSRTETFINLRKGD SARLPGGAKIVLVDLKYEQYDPGRPKSWESTVAIDKNPPPEASA  
PVLTHEEEGGDTLGTTFADPTLNNSLSSAKASSEPATSSAAPAAPAISAE TGAGPGLP  
SSPAPSTPIAELPQYRIRVNTPLRLKGYSIYQQNWHTEKQVVL RDAMGMQFFLEPGMRET  
TKDGFVLFMALDTSQGAGGAAVAVAAAPA VAAAPSAIFLLEQNGKRTVVKAAPEKIGS  
FTFSGYIDQPVSGLA VVSDKGYPFVAAGFILVILGVFITYIRKLLKGILA\*

>SPBIB\_v1\_340064|ID:27163979| Split solet cytochrome c [Uncultured spirochete bib]  
MAEVEKILEKDVSRRSFLKTTGIGLGVAAGALVFGTGIAGAQTQTGTVAEAPLPYVELDP  
EEARLRGHAGYYMAGCMYGA FYAILSMLEKVG GPYNQIPYRMAGYGRGGAANWGTL CGA  
LNGAAAANLVAPDADTNKL VSELLGWYTITPFPSDKSNAIASAKGFKYDAKPYPTLVHV  
TSVSN SPLCHASVANWIKKSGYELGTAERKERCARLTGD TAAHAVELLNAWKAGTFVPTF  
KVDDQTAACIQCHEGDMEGKMACTTCHEPH\*

>SPBIB\_v1\_340065|ID:27163980|aspS| Aspartate--tRNA ligase [Uncultured spirochete bib]  
MLFEQRTNTCGELRAADIGKSVVLNGWVHRKRDHGGITFINIRDRYGVTVQVVVDADSPRE  
LLDIAADLKM EYCL SIRGTVRPRPDTMVNPSMPTGEIEVKAERIQILSRCAPLPFMIDES  
TDAKEDMRLTYRYLDLRSFSMQKKIRLRHEAAFAVREYL VGNGFYEIETPTFIRSTPEGA  
RDYLVPSRLYPGKFYALPQSPQLYKQILMVSGFDKYFQLARC YRDEDSRGDRQPEFTQID  
IEMSFVTREDVLT LVEGLMGHVFKKTLGVQLPAQFVRIPYDEALDRFGTDKPD LRFGMEL  
QDFAPFVDEHCSFQAFHEVTKGGTVKALV VPGKADYSRKQIEELEAKAKVYKAHGLAWM  
KVSPAGVLEGGASKFFSDHARIIQDLGAKPGDLILLVADEKKKI ACTALGAVRTQLGKDI  
GLCDRAVFAFAWVDFPLFEYNEEEQRWEAAHMFMPQAQYHDSLEADPGAVKGDLYDL  
VLNGYEIASGSIRIHDP ELQKRIFRIVGMTDEEAQRKFGFLLEAFKYGPPPHGGIAPGFD  
RLVMLMAGETSIKEVIAFPKNSFAVSPMDQCPNEVDERQLKELHIKIEKEE\*

>SPBIB\_v1\_340066|ID:27163981|bcp| putative peroxiredoxin bcp [Uncultured spirochete bib]  
MIKEGERAPNFALKDASGKTWTLADFRGKPFVL YFYPKDNTPGCTTEACNFRDRYDEFKK  
RGIEVVGVSADSEKSHQSFAAKKNL PILLSDPGKTTINA YGAAGEKKLYGRVFFGTIRC  
TFVIDGEGVVRKVFPK VTPAGHADEVLEWLSSVLNLG\*

>SPBIB\_v1\_340067|ID:27163982| GntR domain protein [Uncultured spirochete bib]  
MEKKRGELVQQLRKMI AEPGRFPDSKLP SERELAQSLGVS RNLLREAVITL EALGYLEVR  
ERQGTFITAPAADDFVASLRFASLWPEEMLCQLMEMRLVIEVPIAGLAALRRSDEEVKAM

RRCIADLEQASLRPDGGASEGAQWDSRLHMLIVNAARNPLLSRLYEGLAATMERYISMSR  
VILL AIDGWPAKIVAEHEALVEAIARQDPQGAEEAQRHHLGSALKALKALTKKN\*

>SPBIB\_v1\_340068|ID:27163983| TRAP dicarboxylate transporter, DctP subunit [Uncultured spirochete bib]  
MKRVLA VAMLMAMVGVPLFAIDIKLAHVVNEQDAFH LAATKFKELTEKYTNGEVKVTIFP  
NAV LGDERTLLERMKMGIVDAGVITSGPFVNFVVPKFGVVDMPFLFRDAEHAYKVL DGP  
DKLFADLEPQGWKGLAWAERGFRLNLTNNKRPINKPEDVAGLKIRLMQNPIYVDSFKALGA  
NAV PMAWTEAL TALQQHTIDGQENPLNVIVSFKL YESQKYLAI TRHAYAPAPIIMSMMTW  
KKLTPAQQTAVLKAAREAAQYERDYNQNEAGWLKELADKGMVITRPDLSAFLKAVKPVY  
DTYSDKFGKDLINAILETK\*

>SPBIB\_v1\_340069|ID:27163984| Tripartite ATP-independent periplasmic transporter DctQ component [Uncultured spirochete bib]

MAESDKAGRNASPLHLLSDGVNKVTEGALFASLLVLVGVTF LQVVFRFFFTALTWSEELS  
SFLLVVWSLLGTAVAFKRGSHIAVTFVLDRLGPLARRLVQTLVALLGLAFFGIVVWYGGV  
MMGSEASQVTPAMGLSMRWIYLMYPIAGVIIVLHIVDSLVA VVWQKEA\*

>SPBIB\_v1\_340070|ID:27163985| TRAP dicarboxylate transporter, DctM subunit [Uncultured spirochete bib]  
MGYLLFGAFFVLM LIGVPIGLAIGLSALIVFVSMGIPLQ MVPQTLLEGNSFALVAVPFF  
VLAGDILAKGGISERIVAFEAALGRIRGGLSVSVLASM FIAAISGSGAATTA AVGASL  
LPDMKTKKYDVAESAALIAAAGTIGVVIPPSVPMVLYAVIAGESVAKL FVGGFIPGILMG  
LGLIGWAA YKAKVRGYPRGERLPLKVVGKRFLSSFWGLMSPV IILGGIFTGIFTPSEAAA  
VAVVYSIVIAAFVYKALDFKKFYKL VVGSVTSALIMFIIATAK LFGWGLAFYQIPQAVA  
SAMLKLTGNVPFLVYLMIGIIVLLAGMFMETASALIILTP IFIPAVVGVGGNLVHFGVVL  
TIGLAIGMATPPVAIDIYVASAITGLPMGKISKPILPMLILAL VFFVVMYVPDIVMVL  
RLVMGKG\*

>SPBIB\_v1\_340071|ID:27163986|ilvD| Dihydroxy-acid dehydratase [Uncultured spirochete bib]  
MISDRAKKGASRAPHRSLMKANGFADWEIERPWIGIANPYNQIIPGHVHLRRITEAVKAG  
VYAAGGLPIEFPTIGVCDGIAMNHIGMKFSLPSRELIMDSIEVMVRGHAFDAIVLVTNCD  
KIIPGMAMAAAKLNIPALVISGGPMLAGRYQNRDVLSTMFEMV GKHAAGTISDEELAEI  
ENVACPGCGSCAGMFTANTMNCMMEALGLALPGNGTIPAVYAERDRLAKDAGRAIMALVE  
RDIKPRDILTRAAFENAI AVDLALGGSTNTALHLP AIAHSAGIDLPIDLFNEIGERVPHL  
CSMSPGGPHHIQDLYAAGGVQAVMARLSERGLIKTGALT VVTGQTVSSNLKRARVRDDNVI  
RPLDKPYHEKGLAVLHGSLAPLGSVVKQAAVAPEMMVHTG PARVFNSEEEAYAAIMAQK  
INDGDVVVIRYEGPKGGPGMREMLSPTAALAGMGKDKTVALITDGRFSGATRGS AVGHVS  
PEAAEGGPIALVHEGDLIRVDIPGKKLDILVGEAELARRRAEWKPYVQPV ESEFLNRYRR  
AVTSGARGAILE\*

>SPBIB\_v1\_350001|ID:27163987| protein of unknown function [Uncultured spirochete bib]  
MGGGSSAFRPADTVGLEVVVPHKVGPEAQHAVCDIAVEADTLTMVVRQVLSELAIGV VRR  
KEWIVDRPXX

>SPBIB\_v1\_350002|ID:27163988| protein of unknown function [Uncultured spirochete bib]  
MLRLWAYLMWHNYLKP YRIRWPKGRRPATHAEASGIDATALENVYRSFFEER AFLTR SPL  
SPTMARSWKKEWRTPGKEEA EYLPKLALG\*

>SPBIB\_v1\_350003|ID:27163989| 6-phosphofructokinase [Uncultured spirochete bib]  
MPDFS IETLGKCSVDSPLGLAGLTGTGGPVFVRDDQFICYNIEARP GERPLLTRDQLLEV  
AGPRQKIYFSPSHVHAGIVTCGGLCPGLNDVIRAI VRSLWHL YGVRRISGIRYGYK GFLP  
EYGLEVIPLDPDIVDDIHKIGGTILGTSRGGGDR TSEIVDTIEQLN LNVLFAIGGDGTQK  
GALAI AEEIERRK LKIAVVGIPKTVDN DIEFVEKTFGFDTAVVKASEAVAAAHMEAH SQI  
NGIGLVKLMGRDSGFIAVHTVLA VHEANFVLIPEVPFDLEGPQGF LPMLEKRLARRGHAV  
IVVAEGAGQHFFTQEVKFDASGNRKLGDIGLFLKEKIEEYFKAKNKEINLKYIDPSY MIR  
SAIAEPVDSMYCERLGNAVHAAMAGKTKLLIGLVNNEFVHIPIRAATSKR KQVNPEGSL  
WRDAIEATQQPMSMVNPK\*

>SPBIB\_v1\_350004|ID:27163990| protein of unknown function [Uncultured spirochete bib]  
MNDEGLYV GIVTRAKNTGVARPEAWLAECGWDEWHAGRGKREETLNSAGAAQALCVRLPR  
WVRGFGAAKPGATNLRQTLKAVRNAVEADV RAGRVMFLLA EFPHSFTYSVGNRLWLD RVL  
GELEGLPLVVGFWSAEWYTSRLIEGLKQRNVALCLYDAPRLPGLPPAVEVLTADR VYARF  
LSRNGAAWKNGQFGHVLDYRYTKKELANIVPRLLMWRRKAEAVGMV FANGRWAAESAALM



NRLLSAHVEAQLPKGGGP\*

>SPBIB\_v1\_350005|ID:27163991| putative DNA-directed DNA polymerase [Uncultured spirochete bib]  
MTSGTIIHVNVI GLMAA VEEIVDPGVRGRPFVVARPDIPRAIVLDLSPEAYREGVRRGML  
VQTACARVRALKVVPPRPELYEKVDQSLLEAAFCFTPLVERAGRHLFLDVNGTRRLFGA  
PEDVARLLGEIADQTGLVPTVALASTKTAAKVASRVFRPFGFAPLSVNDEGELVARQPV  
ELLPGVGVKLLPRLISLEIGEIGTLASLSMDEAQAISARGPELVLRARCVDDSPVNPEPP  
SRRMLAGETVFEPDCADPDLLAWRAREIVAELGFRMRKEGFGAHFVMAKLVYTDGAVASR  
SVRAGQGASFVADIQLCEAAERAVRQAWERRVRVRKQLIELGGFEPAGPELDFEPLPFF  
KAPEIDSTGIQTRRIAMHMRVQSALDRVHGKYGQSAIVPAAAFLYREGSLVC\*

>SPBIB\_v1\_350006|ID:27163992| Error-prone DNA polymerase [Uncultured spirochete bib]  
MLTPLVTHSAYSLLWGVLTQQQLVEAAASAGWNALALTD CNGMYGLPVFLDACKERGLRP  
IVGVECTGGWGRVVTIARTKEGFSRLTRLLSARA AVLNEAGLPA YTRFVTLGRDNKQHSE  
ALAKADTLLWCELA AIAAMSDPGLFLLSDSPIFLREVPCSPWLFALLSTAHASQWRALLK  
TGHKPVLSPEITFLEPGQREVQRLLAAIGLVTVREV PGLMLAPEAAAF EYARAADNAGE  
IGLSLASDNSGSAAWFASAPLESRFCDESSLAEAA TANRCITEEALSEPFGDFV FPMWQ  
AAGATDEVAGTCAPND DAGAGISAPVALRRLAYEGAARRY GSLPPAVRERLEYELGIIIE  
KGFCDYFLVVNEI IKKAKRICGRGSAAASIVSYALGITD VDPIAHNLFFDRFLNPRKDP  
PDIDVDFAWDERDSVLEETVRMFGAEHCARVANHNCFRFRGALRDTARAFGMPDEETSAM  
ERRIEHNRDAALASADSVWKDIFLLAIRITGLPRNLGTHSGGIII VPGNSADHVPVERTG  
SGILVTAWDKDGVEDAGLVKIDLLGNRSLAVVRDAIQNLHENGIELDLERWRPEEDADTI  
AMIARGDTMGV FVYVES PAMRL LQKKTGVGDF AHLVIHSSIRPAANRYIEEYIERLKGKA  
WKPLHPVLAELFSEY GIMCYQEDVSKVAVALAGFSSSDADAI RKVLTKKDRGHRLEMWK  
QRFYEGAAARGVAPDVIDAVWDMIMSFSGYSFVKAHSASYAMLSFQSAWLRAHYPAEFMA  
AVLSNHGGFYSTLAYASEARRMGLELLPPDVNESALRCKGKDGAIRWGLGMIAGLSESTL  
KALVEARGGDTTPRRSSIFRPFVSVEDFAARVPFSREEAEAFV GSGALDSIAKGMGRPAV  
LMALLKACTARARHAGPGLFEDPERISRGAHISSTSHTRISSE GSPSSSKTSERRIALSQ  
MQWLGTTLSCHPLSLVPGALQMPRLQAVALDRHIGEYVRLAGWLITAKEVLT THEEPMEF  
LTFEDETASFETVLF PAGYKQFRPALLEGGAFFVEGRVEESHG AITVTIAALRRLPAIPK  
LAETPRAPPSGFGYASKFGYQAVSRN\*

>SPBIB\_v1\_350007|ID:27163993| protein of unknown function [Uncultured spirochete bib]  
MDRIVAVSDTVNAGIHALALAEANGGSISAREAAERLQVSPSYLAKIMQKLAIKGLLTPT  
RGLGGGYALTKPAEQISCLEVLTLLEGDLPRRECLFAKAVCRTGT CALRTFCADTEKRLR  
TALETITVA AVARSF\*

>SPBIB\_v1\_350008|ID:27163994| hcp| Hydroxylamine reductase [Uncultured spirochete bib]  
MYCNQCQETMKNTACTLAKGVC GKPAETANLQDLVLHVCKGIGYWASKALPLGFYSEDDA  
FYVTRMLFATITNANFFTQDFEHWIAEGLERRERIRL A YVAKGG AIDSTPPDAATWSAAN  
VEAIRTAAAAGKGALTEIADEDIRALKALVLYGLKGMAA YVEHAY AIGISERGIFEFMLK  
ALAQLADERVSKDALVSLVLKTGKAGVDAMALLDRANTGAYGKPRITKVRTGVRNRP GIL  
ISGHDLRDLHDLLEQTKDTGIDVYTHGEMLP AHYYPFFEKYDNL YGNYGNA WWKQDVEIE  
KFHGPVLFTSNCLVPPKESYKRVFTTGIVGFEGCTHIPDREPGKMKDFSAI IEMAKTCE  
PPEQLEDGTIVGGFAHDQVFALADTVVEAVKSGAIKRFIVMAGCDGRQPKRSYYTEVAEK  
LPDNTVILTAGCAKYRYNKLDLGDIGGIPRVL DAGQCND SYSLALVALKLKEIFGLDDVN  
KLPLSFDAWYEQKAVLVLLALLYLGFKNIRLGPTLP GFLSPRVAEIL IENFGIKGIATA  
DEDVAAMVAGR\*

>SPBIB\_v1\_350009|ID:27163995| HAD-superfamily hydrolase, subfamily IA, variant 3 [Uncultured spirochete bib]  
LIKLYIFDEGGVLIRNHTIVDKVAAALRMESEEFRLMLQDIFALSRGEIDSAEFWRRFA  
TRSGIEPGEDYLR TLFKPARDEPTFELVKELAQHARV VCGTNTINSHHQINIELGMYEPF  
HSVYASHLLHYAKPDPEFWRIILKAEGVSPAEAFFTDDSPDNIEAARS LGIHAVLYTDAA  
GLRRELVALGAPLRSPFIR\*

>SPBIB\_v1\_350010|ID:27163996| conserved protein of unknown function [Uncultured spirochete bib]  
MSEFHPWL YEARGQKAVAALAKNGFDALYLPSAAQAAEKVLEYVEPGAKVGF GGSMTIKS  
MNIAALAEQKGAIILDHNRPGLGAE EKMEILRAQLTCDVFISSANA V TLEGFLFNVDGNG  
NRVAALSFGPRKNIVVAGINKVVKDLDEAYERL KAYAAPLNNKRLSKPNPCTTAGYCADC  
ALPTRICRIYHILKRKPSLSDFTVIIVGEELGF\*

>SPBIB\_v1\_350011|ID:27163997| Response regulator receiver protein [Uncultured spirochete bib]  
MDVAMPVMNGIEATRQIKKEGIDSIVIMLTAFGDEKAMEEAAEAGADDYLTKPVEMHALK  
ARIELAKKARTFHVARSKLLIENKMLIGVKEEEINACIEENYSLSAELLYRLSLAAEFRD  
DDTYEHTRRVGRNAAMIAQYIGKDAEYIYLLTQAAPLHDIGKIGISDTILLKPGSLDNDE  
FETMKTHTIIGKKILNGSQTKILQLAESIAYSHHERWDGSGYPQGLQGESIPLEGRIVCI  
ADSMDAMFSKRPYKKGMPPEKVKEELQKNRGLQFDPTMVDAVLEHWEEIADMYHAEAGG\*

>SPBIB\_v1\_350012|ID:27163998| putative two-component system hybrid sensor and regulator [Uncultured spirochete bib]

MNTAQKQIKAYLRSAFFYSVVAVLVYFFLRNLHFGYMEHLLFEFSSIFFAMTLFVLYVIA  
PRWKQSEGLIIFGIVLLFVSLLDVVHAVRFSGFPGTSDMPSSVTFWVLARGLQAFGLIAA  
ATRKDILAGKKTSTTLLSILLPITAGIGLFIYSVLPSPGIFIEGKGTALKANLEILYAI  
LFLLFAILMRHEPEAFIAGALFAFSEIAFITYVNVTDPRILGHILKATGFLALGLFSLK  
KYFLMPLKEMAEVQRTYSAENQGLKSTYETLTQRWNEMIKCREKIIQCNSIDAILSLERE  
FFADPSKTIRLAKFEKDRLLFKNDPGLPEEKSAYLPEQFERIDMENGTTVFLDKESGFYL  
NIYKPFLLFIDLAKKNLLEKNQIALLNKLVEEEKYRIDFLRSFSHELKTPLNVIYGYLQ  
LFSTEAFGAMSAQAKTALNEMIESVKKSNEIINDLLNLAESAESGAVSVKCDRIQLKSFLN  
RILVEAKKNALLKNLDFVIECDGEPEISVDPKLFGLVISNLAASNAVKYTDKGHVRFARA  
DDKTGIMIEVKDTGTGIPAEIDAIFKPFKKEHARGGFGLGLSLVKTYTQLIGGKVSVE  
SQVGKGSTFRIEIPPLPKIDVSKVAKGQKADFLLEPKTTRDMLKILLKDSVVEEAESD  
EKGIVAALSTLPDMIITDFGLQRTTGDQLIKRMRTYPELADRKFLLLTGRSSDLTDDI  
PVIEKGNIDLQHLAKVLMAIRNDAIALVFCKGESEERLDRAKGIVRTQLAGRDSVEIDIS  
EPGLSELCLFDEAYFLTPTDSESRQKIENIIFRRKTYFSKENVVLEV\*

>SPBIB\_v1\_350013|ID:27163999| PIN domain protein [Uncultured spirochete bib]

MLRTQNIPKFSVITYGELIYGARKSKHPEKNMATALRIAELFPVIDIHRGIIIFGELK  
AKLETSGSRIDDMDLLIASTAMYMNFSVLTNSKGFHFGRIEDLPLENWNREDI\*

>SPBIB\_v1\_350014|ID:27164000| protein of unknown function [Uncultured spirochete bib]

MSKEPSGIERSCAIREIKLAGGGLARRWQARHQPRHAGGKGGWAGGPRGSSGA\*

>SPBIB\_v1\_350015|ID:27164001| Metallophosphoesterase [Uncultured spirochete bib]

MNQEGKKPGAMPARRTMFLAALVALVGLIIMNSYHYSLEGARGLYVWHPLLALKILLFMG  
LVPIAIAIVSLPLEKLAKKWPMLVMRWISMAASILVGAISIALLAFLIIVPRIGSLEPAR  
LELIDPAKGIHALGTQPAEASFSAGTTNKGAAQPGIALQPPQSAALQPAIIAQARSPLDM  
PLLRLSFSSDPHWGADTSNAQARTQILESIAQRKPDFAFFMLGDTVETGNSATQWNFALSD  
LEALIPHVPVRPLLGNHDALFGGQYLRYKAFFPKGFSSDSGSPYYWSIDAGAATIVAIDL  
PWGTENFGARQRAWLEKTLAAADPHKPLIVLSHSYFYASGYDDPDFGSPWYDHYQNIPAL  
VPLFEKYGVDFVISGHNHYQELLAHNGIAYAIVGSMGGIPDPQPSYRSPWSQWIAVGVHG  
WLDVEVQPGKLILVFRDEQGAERHRAELRY\*

>SPBIB\_v1\_350016|ID:27164002| putative sucrose phosphorylase (Sucroseglucosyltransferase) [Uncultured spirochete bib]

MNEYMNMKIKDLLIFIYGREQGM LTFDSLQQLIPKKTSSKAAKLRDSLTEKDTCLITYG  
DMLQPSKKEPETHSQTALQLKEFLERWNHGSFNYLHILPFHPYSSDDGFSVIDYREIDP  
ALGDWNDIAALAKEYKLVFDLVLNHGSKQSAWFQSFLENKESYRDWYITKPADFDVSSVF  
RPRMHPLLPFFRKDGSVVFVWTTFSEDQVDYNLANPQVLLFEKIFFEYIEHGARIVRL  
DAIAYIWKEDGTSCIHHPKTHAIVKLLRALIDYLELDVLILTETNPNEENLSYFGKGDE  
AHLVYNFALPPLVLHAAVSGDASPLRTWANTLPQPGEPIFFNFLASHDGIGVLPINGLV  
DDLDFKKTNTVIERGALVSYKNAQSGPVPYEINCSYLSAVAPLSLGTSKERARAFLCCH  
GVLFAFAGLPAVYFHSWVGSEQWEEGPQLFGYNRAINREKPRKDIVETALNDEHSLRASV  
YTGFEKLLTFRKSERSFAPDIPQQLPAEGSVFALARGPDPSGRYVLCIQNLSNNQAKFD  
LRTAPKIEILIQHGIDSEMLLSPWETRWIGYGGGKAISMLEI\*

>SPBIB\_v1\_350017|ID:27164003| conserved protein of unknown function [Uncultured spirochete bib]

MHIQQMWIERCAGVLGKNLPEQNVLEKLHYRYTCPAREKGTYPQLWWDSCFHAIYRWF  
DPDMAWEELQSLLMHQFEEGPD TGMVPHMSHLAENGALSAQQLFQNKNSSTITQPPLISI  
AALAVHKKAPNKNILAKLYPKLLAYHDWFDRRRDDHDGLAAIHPWESGWDASQRWDSL  
MGLHACTKEELFELEQKRKNLVSILA AHKYDAKTLAHVPEGFYAEPADFNIRAADLMAL  
AEIAGELGKIAESRELEMRAKAVQQAVHDKMISFKDGELFVHDLLGASEEKSAVDHAGKF

VLLFCQCLSASEAESISLQLFRSADCYATPFRVPSTSRFDALFNPKEYWRGNVWLPVNWLIWRGLLSYGYKEKAHTILEDISLVQNSGFCEFFDPITGKAGEKYGQSCPRNQSWSTIVLDMVLDSEQUIIEGKADE\*

>SPBIB\_v1\_350018|ID:27164004|ugpC| sn-glycerol-3-phosphate import ATP-binding protein UgpC [Uncultured spirochete bib]

MVSYLKLNSLKKTYPNGVTAVKIDIDLEIEKGEFVVILGPSGCGKTTTLRMLAGLEEVTVNGSIILDGRDITHLPPRQRDISMIFQSYAVVPHMTVAENIAYPLKLRKMDKHTIHSKVQEVARICNILDYLNRYPAQLSGGQRQRVAVARALAVDSKLSLMDEPLSNLDAKLRTSVRTFLKEIHRNTGATTIFVTHDQAEAMALADRIVVMNEGKIEQVVGSTREIYNQCGSLFTAQFMGTPPANIQKVSLISNQRLIANDKNAETQFSLDLGNQSAFPGIDRYIGEEIFLAIRPENINISKPKGNETSIEIVEPQGAYTILVTKVFGSEWKIMLEGDIDIRIGQKVSLIIDPGKIMLFDQSKKRNVNFS\*

>SPBIB\_v1\_350019|ID:27164005| ABC transporter permease [Uncultured spirochete bib]

MSMHPGKLWSRTVFLILATIASTVILPILYFLTISFASNYEAYQFPAKIFPTFSYSAQLRYNAEKGSYTLKKKGSTYEA VKTTQDVSDFLYCKSQLNVLLSSAAVQELFDKAKNTDHALPIKLLKDFFRNYIVFFILAEGMTMRALFNSLKAAGWTILISLILGGVSGYIMARYKFKFSNTFSTSLLVVRMFPAVALSLPLVVYIMKMNL YDTSFALAI VYAVPNIALTAWITSSIFKGISVELEEAAMVFGATRLLKTLMTITFPLAFPAAIASSLYAFLAAWNSITALIMTNNNPTLALLVYRTVGSSTIPNLPAAGAVVLLVPSLIFTFIKNYINQLWGKVAL\*

>SPBIB\_v1\_350020|ID:27164006| conserved membrane protein of unknown function [Uncultured spirochete bib]

MNRMRRAGFFKSPIWFLVPVIIYYAAFWRPTISVIIESFTDKSGVFSFANYVRLFSQKSMRTAFLNTILFTLGSAILQFILAFALALWLNKKFRFSNLVLFITLIPMAFPPAAV GILWKTGLYRFGWINSFLCSLGLMNPANPVDWMSFRNL YAVILLIHDITWTVLPSVMILLAGLQNFNKEFEEAGWVFGANKFQTLKDIVFPIMKPTIITAMILRMIAAVQVWLIAMIFGYNVVPFLVERIAYNVDVITFAKYARKDAYTISVIVAAIVLISVSIYLRVSGEKQKGGEIA\*

>SPBIB\_v1\_350021|ID:27164007| putative Extracellular solute-binding protein family 1 [Uncultured spirochete bib]

MAKSRVTFIAVFLILIGLASPPFFVMAQGTQKGEKIKIVSQMFYDPAQQQYIKEQILPKFTAETGIEVELQVVANASELYKVIQAQQQTGKWSTDILIAHDSTAVPIVQEYRAVQPYTKIPAGTYITQFDDNFVQGGKRYFVPLQADVYLTIANRKALPYLQKLG YDINNLTWEQLAEWVRLIKKETGLPKYVFPALAGKFATYEFNAVQLAYGDKYVPAFNTPASQAAFKL VASMKEGILPSSPTIDFPTASLATEEAWITVFHQAYANASFSQAPDKFIVAPVPIGGSGKRGTIIGGHGIGIAGSTHKA AAEKFVEFFLRDDILYAVMKNTGPWIPSKAEITSKLKDDPSDQIMKMGLATLTGPTLIDRVRVAEYQDWGQVKRLYEEVIGDILAGKDINKQYLD AKQKELES LKVN\*

>SPBIB\_v1\_350022|ID:27164008| Oxidoreductase domain protein [Uncultured spirochete bib]

MNAQKGAIQSILIGAGNRGAETYGRFALAHWPWFKFTAVAEPNPVRRTNFAAQHDISEEKSTDSWEKLLFVTPRDVVFVFCSPDRFHVEQVLALIERGCSIVLEKPVV VNAQQCATLSKLALGKNTNII VCHVLRYPFFSTLKRLLDKGKIGRAITFNLQENIAYYHFAHSYVRGNWRNTSLASPSILAKSVHDL DILYWLAGAPPETV VSMGDL SWFKKENS PENAPDRCLDGC PHADTCPWYAPDLYLTENTGWPTS VISDDTSLASRMQAIETGPYGR CVYRCDNDVMDHQDVLIRFKNGINASF SMNALTYNKTRIIQISGSEGEIVGDLDEGWIEVRTFLHGTKERIQLGSSVGHNGGDVGLMNDIASIFKQIDDSPEPETNKTIQIKNSKSSIEESLEGHWMAFAAEESRKKGIFINMDAYKRDGVSTRETVNI\*

>SPBIB\_v1\_350023|ID:27164009| putative AraC family transcriptional regulator [Uncultured spirochete bib]

MLVLFCECTNLHDLSDSILFDMNPVREIITYTPGYSFCIQYFDDRRLHFNWHYHEDI ELVLIKNGEGQA HIGDLVKHYKAPAGFLLGPSLPHGLLSIGFLQGWIIQFQEKHIKYPNAPSEFINILNVIGESKKGLSFSSPAIVDCLPLMENLNSSNGLDKWLWLLKVLNVLSQDKNRELCSLLPHNQEVLTDRFEQAITQIFNEIDKTYNLEEVSRKVG MKVSSFCCKTFKKRYGLSFI EYIHSIRINNAKLLIQTKFYIDDICYESGFNNVSFFNRKFKEVTGLTPSEYRKRYREA

\*

>SPBIB\_v1\_350024|ID:27164010| 5'-nucleotidase/2',3'-cyclic phosphodiesterase-like hydrolase [Uncultured spirochete bib]

MLQRIGKFAVLVA AIFTLAFTGSLSAQGS LPNLPANVQITFAHTNDMHGRIVESKDVIGF PKIYAAVQELKAKNPNTLLVDVGDTFHGLPVVNIDQGQTAVKLMNELGYAYMTTGNHDYNYGFARLLELAKMANFKILAA NVYKDGQRVFPAYDIRDMGGVRVAFFGLATPETAYKTDPK

GIQGVTFSDPIVEAKLVVAELAGKYDLLVCLSHLGVDSSDPTSITLAKFVPQIDILDG  
HSHTSLADIQKNTTNTLITSTGAYGTGLGVVDVVVGS DRKVISKTARTITPQNSPDLKG  
DPRIATMLSDLVKAQDAVLSQVVGQTSVPLEGKREIVRTQQSNLGTLIANAMLYVTGADF  
ALMNGGGIRDSIPAGNITLKQIYTVQPFNGYIQTGKVLGKEIDAILENGVGKLPAPDGRF  
PHLANLTYALDASKPAGDRVSDIKIGGVVDPDPKEYTIATLNFLFNNGDDYRMLVGKAKN  
DFPSDAEVFIAYLKHLGTVTNENMVYQK\*

>SPBIB\_v1\_350025|ID:27164011| putative PfkB domain protein [Uncultured spirochete bib]  
MTFTQPSEHQFDIAFLGQYTKDTHITKSETRIVDGGAYFYGSAAAAALGLKVAAITRLAA  
SDFASFRLLERGVTVKAIPTKSTCLQLLYPSDNPDERVLSVTSVAEPFEPADVASITA  
LVWSIGASIRGEVSLDVLKAIKAKGARIGLDAQGFVRVVRDGTLAYDREWPEKAEVLSLV  
DVFKADVVEAEILTGTRDLRQAARELAGFGVAELVLTHADGVVVYAGGSFHEAPFKPKSL  
VGRSGRGDTCLASYLAARITMPPNEATFWSAALTSLKMEALGPFAGTQADIEAALHERYG  
LHKVENT\*

>SPBIB\_v1\_350026|ID:27164012|fbpC| Fe(3+) ions import ATP-binding protein FbpC [Uncultured spirochete bib]  
VSVRDFSARSSNVTLIHLTKKFRSLDGSGEIVAVNDVNLEIQAGELVTILGPSGCGKTTT  
LRMIAGFEYPTSGSILIGGRDVAMIPPNKRGLSMVFQSYALFPHLSIYENVAYGLRVQKL  
PAQEIRERTERALELMQLTTMARRFPSQVSGGQQQRIALARAIVIEPSVLLFDEPLSNLD  
AKLREYMRDELRLKQKRLGITSLYVTHDQSEAMAISDRIVIMKDGCIQQVGTPREIYAYP  
HSKFVADFMGKANFINVNLGMEGETVGLGGREGAGSSEISAAAERAARIEIEGRQFVVP  
RPGAVAPKAGKALLVVRPETLKL VPLGESASEADLSAGSARGSPGISALKGRIDRFTYFG  
NIARYEVSTENAPLLIESYNPGASQILEEGAAVGVIVDFESARLLPADEQEHR\*

>SPBIB\_v1\_350027|ID:27164013| ABC transporter permease protein [Uncultured spirochete bib]  
MRKNTRFSIAHLVRDPVLLFLVLLVFTGLILFILFPLYKIFVYSVTNNEGRLSFQAAIDM  
FTSKAYARPLGNSMLLGITGVLATLIGYIFAYALTRTDIPLKGFRTIATIPISPPFI  
LSLSMIFLFRNGLITRKLIGIEDANVYGMHSLVVVQTISFFPIAYLTLTGTL SKLNPAV  
EDAALNLGASKARIFRTVTLPLSVPGILSSLLLVFIQSMEDFSNPAVISGSFSTLSVEAY  
RTITGMYDMRGGSLMALMLLAPTIAFVLQKYWLAGKSFVTVTGKPTTARAQSRDPKLVW  
PLFAFCMLVAIIILFYGTVLVGAFVKIWGINFSFTWSHFKYVMTL GWQPLRNSVILALA  
STPIAGLLGMIIAFLVVRKEFP GK RAMEFVSMLTFAVPGTVVVGIGYILAFNDKPFMW TGS  
AFLLMAFTFRNMPV GIESGTSTLIQIDRSIEEASTILGATGAVTFRRISLPMLKQAFFS  
GLVYSFVRAMTAVSAVIFLISPRWNLATISIFSLFEASKYS DAAA YIVVMIVII VVAIGG  
LNLLVGLLGNSGTVASGGNSERT\*

>SPBIB\_v1\_350028|ID:27164014| Extracellular solute-binding protein family 1 [Uncultured spirochete bib]  
MRKIFLSMFALMFCVIPLLSVGAQGTAEYKLLTVYTALPESELPTYFSQFEKDTGIKIY  
VRLSAGELLARVRAEKNNPQASVWFGGSYDNFVPASKEGLEAYQSPELKNIPKVVYWDPE  
GFANPFYVGAIGFACNTEWFKKGLPYPTSWDDLLKPEFKSQISMAHPGTS GTSY TILAT  
IVQMRGEEGAWKYFTALNQNRQYTKSGVTPPMDVGLGEAAIGITFSHDGLKPAFEGYPV  
AMSFPKDGTGYEIGCMALIKNGPAKETANGKRFIDWMLSKRGQDLFETS KSF R I P V N T L A  
TPPKGAISVDSLKVINYDAVWAGQNRNRLVEQFTKVVAASNLK\*

>SPBIB\_v1\_350029|ID:27164015| PfkB domain protein [Uncultured spirochete bib]  
VKYDIIMLGHISKDIIIDEKGQENRLYGGALLYSSISAARSGARVLAITKAAKGDFGALD  
VLKQQEGIELVVLESPASTSIRNVFLSSDHERRQTLLSRAEPFSAADIPEEAEAEIIDL  
AGL FV GELPDSLIEELA QREPGKRASGERKSGKRAKIAVDAQLLRE A QPDGRMIFRDWK  
NKHRYMPYVSYFKADAAEAEILTGLTDREKAARVIASWGG SAGGSPWAGREPEVMITHNT  
EVIVLAGGQIYRAPFTPSNRSGRTGRGDTTFAAYLAWRLSHGPEESVRFAAALCSIKMET  
PGPFSGTIEDVFKRMR\*

>SPBIB\_v1\_350030|ID:27164016|plsY| Glycerol-3-phosphate acyltransferase [Uncultured spirochete bib]  
MLAMILGIILAYLAGSFPTGLVVGKLFKGDPRQQGSKATGATNVFRVFGAKAAIPVALV  
DVGKGALAVFLAAWVGRNAALPREALQVAGAVAAMVGHVFPVFAGFRGGKGVATGAGALI  
MMAPVAAIFCVLGFLLVVGLTGIISASSITAALILPIAIALGAQGSPPNPWLLGLGIAIA  
IFIVFTHRANIGRILRGEEKSFEQFRFLRRKKHD\*

>SPBIB\_v1\_350031|ID:27164017| putative DegV family protein [Uncultured spirochete bib]  
MRKLGRRSHARSTIASNEKQAGALICPALPFDIECNIVNLMKISYLDGPRLSRALTAGSQ  
TLIQNSASLDAINVFPVDPDGTGTNMASTVRAITSSLA AFRPKNAGSVLKRAAQ SALAGA

RGNSGAILAQFFSALAEELQHDARIGAKRLANAAVSAAEKTRRALSIPKEGTILTVLHDW  
AHAMHEKAQQSDDILHVFIAYESAKASLARTRNMLPEMKRAGVVDAGAKGFVHMLEGIV  
QLIRSGSLKEAARADKSLQASTGAMLDQAPNDVDVLLASSDSQFRYCTEALVHGEGLDL  
DAIRTQLSQYGDSVVVAGTESLAKIHVHTDAPYQVDFDLDSQGLVDSHKVDDMELQKLLA  
HRAQLAGQNQRAAAATEKPTCAIVTDTGCDLPEAFLFEHGVKVPALITIDGKTRPDGPA  
LDIRAMHRLMREHPDFSMSTSQPTDAAFSRAFAIAAGHSNEILYIGLTAALSGTFQAGVR  
AATSLFRGSAAPAGQTGQDGRTERAGHTEQTGQTERSPPHFVAFDSRTVTAQGILT  
SRAVEMAEHGLSAGEIARALETLRDRMVFFVAVRNLSLIRSGRLHGVKSVILRKFGLRP  
LLTTNKEGKAETAGIYAGEKNTVSALLSRIKKAFSAGSRAELHISHVDAPEEAQKLADLC  
AAYLHPESKIVISEMGPVLAASLAWLGAISVAGLPESVPKLV\*

>SPBIB\_v1\_350032|ID:27164018| putative CoA-binding domain-containing protein [Uncultured spirochete bib]  
MAEKYKRGLTPVRLDAKARALRDEAIRIAARAKAEGRSALTELEGMALLSAMGIRTPRYW  
LVSSADEFLGRLGEKTSSNVSIMPGPFPGAKAVVKVISPEILHKTEVQGVEIVDNTTASI  
VDALRRMEGRFAGARLDGFTVNEFIAFEPKLGHEMIFGYRFAPDFGPVVSFPGGGIYTEY  
LATKFRQGAANLILSPRVSNPKALEALLRENVYGLLCAGLRNTKPELAPEALQRAIQHF  
LDAADALAAAGIGEFVNPMVLSHAGELVALDCLVTLKDFSSMGLASDKDGLPVNMAQQT  
RPVQEIGRILKPASAAIIGVSEKGMNNGRIILRNLIENGFDTSHLYVVKAGIESIDGCRC  
VPDVASLPEKVDLFLVIPAASTPATLAQIATYDKAWSVIVIPGGLEEKAGSESIVAEMR  
RALSEARGQGKGPLINGGNCLGIRSVPGKYNTLFIPEHKLMPKPKVEPLAVLSQSGAFA  
ICRISKHPAINPKYTITCGNQMDLTIGDYLDYLAQDPDLHVIAVYVEGFKPLDGEKTLEA  
CRRITESGRSVIFYRAGRTQAGAGAAASHTASIAGDYPVTRQLFAQAGAIVCDSLDEFDD  
AITLFTLLDGRKARGNRLAAVSNAGFECVAIADNLGGMVLSFGEATKAELEEIFRAARI  
TEIVDIHNPLDLTPMAGDDAYEGSFRAALLDPSADLGIVGIVPLTVMMNLAADPAVHSE  
DVTREDSIAARYGKLMRETDKPFVTVVDTGPLYDPLCRELEKYGVPVVRTADRALKMLEL  
WRNSPAAR\*

>SPBIB\_v1\_350033|ID:27164019| Indolepyruvate ferredoxin oxidoreductase [Uncultured spirochete bib]  
MTCDIILCGVGGQGLSVSVVIARAAMASGFLVKQSEIHGMSQRGGQVLANLRISDKEIF  
SPTIPK GKADIIFAFEPLALRYLSWLSVERGTVVAATTPIRNIPSYPDIESVLAEIRKL  
PRARLIDADSLAKQAGNVRSANLVLVGAAADLLPVPPEAIEKEIVALFSRKGEAVVQANL  
KAFEYGRSIQHG\*

>SPBIB\_v1\_350034|ID:27164020| Indolepyruvate ferredoxin oxidoreductase [Uncultured spirochete bib]  
MAEMVLSGDEAVAQAALDAGLSGGFAYPGTPSTEIMEYLQEHLGDKRAGAGDADGSAETG  
SVLEVRTAPRVAQWCANEKTAYESALGVSFAGKRAMVSMKHVGLNVAMDPFTNSALVRIH  
GGLVVVVADDPGMHSSQDEQDSRLLADFAVPCFEPSDQQEAYDMTRLAFDYSEEHEVPV  
LVRLTTRLAHARALVTMAPARDVPARGKCTDPYSWILMPEMARRRWLALLDKQPIFRADA  
EAASRLVLGSKELGVITCGLARAYYKENEDEWARAHGGERPSHLHIGRYPVGAEKIRALV  
AHVKRVLVIEEGYPYIERDLRGIFGTPVPVAGKMTGEIPLAGELSADSVRLALGLQAREG  
SAVAGIEVPGRPPQFCQGCPHADSITALKKALEGEAEFFTASDIGCYTSLALPPWNAVES  
CVDMGASVGMARGAASVGQKHAIGVIGDSTFYHSGMTNLIDAVRYRTPMTLLILDNGTTG  
MTGAQPTISGTSQLPKLLEGLGVEKEHIRVLEAHKRALDTNVA AIREEIA YDGVSVIVMV  
RECIEWLKKARKS\*

>SPBIB\_v1\_350035|ID:27164021| Glutamine synthetase, type I [Uncultured spirochete bib]  
MKLSEWNGDFAGIDYVSFIVIDIDGRMRAVSLPSSYASEAVLSKGIGFDASNFGYAKVHA  
SDMVAVPDMESAFVEQKDNFNILHVFCNVQTMDOGFFAQYPRSVIRAAQHALQASGIGDD  
AKMLVELEFYVFEDVRYSTTAHHSYYYVESSEGIGEEYS DTPRLGMSQGYHRMAPEDRYQ  
LLRNRAVKT MIDVGIPVKYHHHEVGAAQLEIELDFISMVKAADAVSLAKWILRNEAEGLG  
LHVTFMPKPMYGVAGSGMHVHQFILKDGSRIFPGEGLYGLSDKGLAYTAGLLSHALTGSL  
LAFSNPSTNSYRRLVPGYEAPVSATFAQGSRAAAVRIPGYLGKGEARIEFRTGDATANVY  
YFLAAMLLAGLDGIQKGLDPVALGYAKEKPSEKHIFPMGLFHVLSGLKKDRSYLEPAFPS  
ELIETWIARKEKEASYVYNAPVPQEYELYFD\*

>SPBIB\_v1\_350036|ID:27164022| protein of unknown function [Uncultured spirochete bib]  
MLSVCVSFFDTIVSYLVGLGKPGYNILAHELKCWGRSRGPSFKARVCELNRQGVLLRRL  
GADMQAKTAAATDDAVRSSERGLP\*

>SPBIB\_v1\_350037|ID:27164023| protein of unknown function [Uncultured spirochete bib]

MACASGKGACALHMPAQRQSRPRYASARAQSSKLCACHERYAQMVELADTLDSGSSAKAW  
GFKSPSGHFQALFGEPFLLP\*

>SPBIB\_v1\_350038|ID:27164024| putative Site-specific recombinase, phage integrase family [Uncultured spirochete  
bib]

MGAKIRLRGKQKYFYLDICLNGKRRFEALHFALPADRQGQREAWALAEIIRRKRELQIAA  
GRYQLVDPVGSKMTLIKYAEKIAAEYDKKMHLPKSLKYLRQYAGDTALVDVDERFIDAYR  
AFLKQOGELGAKTAQHLYLAALKAVLARAERERLIERNPAKGVKPIRAPEHEKPYLTVEEI  
QRLYNTPVEGELADEVRRGFLLSCTGLRLGDIRSLLWGDIREPEPMIKKRQNTGDIV  
SIPLAPIAWELIDDKRLHRQDELVFPRLATKGVNPHQPLIAWRKRAGIEKAFGWHAGRH  
SFAMMTLEASGDIYAVSRLLGHSDIKITEVYLRMTDQRKKEIIASLPQVKKDSERIIKLA  
AEKK\*

>SPBIB\_v1\_350039|ID:27164025| protein of unknown function [Uncultured spirochete bib]  
MPKLTNIPIETFTKKVKS LAHEDAGTILTPSGIDRGILPQDAGTLPVRILQKYLRGTAG  
LAYIQRKSLRAFRQEEHLSRTDLAKLFNVKVSQVARWLAPKKNNDLIPILVSDLMKAKI  
YLIPKDLERVFSSITKVADDFKG\*

>SPBIB\_v1\_350040|ID:27164026| protein of unknown function [Uncultured spirochete bib]  
MNAAGYKKS PRGWGGHGAKGNSRTIINIDKNRENVKLPDWMRRKIAKIAARKDDFALFEE  
QAVILLAAECSTFPKQAARIPESLREKLT YQRPDMLDPLERASIAIIAAQVEDLADIFVQ  
HPYEDFFDLKARALAITLEEGGRV\*

>SPBIB\_v1\_350041|ID:27164027| conserved protein of unknown function [Uncultured spirochete bib]  
MSSDPYLDTVDELGAEEERAKKERLAKLEIVSGAALLTTHYEKPKYLWQGVLPDAGLAICA  
ASKASGKTL LLLQLADAISRGRDFLGIPTTESKVL YLQLELSQRRTAQRLKMGIVPCAN  
FDFAFRWPTGAEGLQALADSIEAQGYRLVIVDVLQLLWPIEADANSYQDVYAVLAPLRQL  
ANDLGVMIALVTHRRKMETADYLDGVMGVSAMQANADVLLTLIRSRGEENAVLFLDGNDI  
EAQKLALDFCTDPLGYRLSTASPEELRQTPERRRLIEYLREHGGHGRTSEIATALGIDDS  
TVSRLRLADNGLIVRTQYGEYTLQKGIQTVQSVQT\*

>SPBIB\_v1\_350042|ID:27164028| conserved protein of unknown function [Uncultured spirochete bib]  
MEKAQNPCTALERDKMYQRPKVLECGEKLESIGDILHTHACKCYHYVCMEQNKIKRFL  
ANGGYLRMSQAIAAGMSRHAFYALRDKG VVIQESRGLYKLSGQPDHPYPDL CVMSLRYPK  
AILCLVSALSFHNATTQIPKEVNIALPRGSRT PAMRYPPLHAYFFSKASYETGIEEHIIE  
GVGVK VYDLEKTIIDCFKFRNRIGMDVFLEAIKLYKAKAKVQPSRLAEYAKICSIEKAIT  
PYLEAIL\*

>SPBIB\_v1\_350043|ID:27164029| transposase [Uncultured spirochete bib]  
MAITKEVLDELLKEYKGPEDLTGPEGLLKQLTKALIERAMDAEMTTHLGYEKHDQSEKDT  
TNRRNGRTKKT VRS DQGP LEIEIPRDREGTFEP AIVPKHQREFKGFDDKILSMYSRGMTT  
REITEHLKEIYGTEISP ELVSRVTDEVKELLEAWRARSLETSYPIVFLDALMINVREDGK  
VVKKSIYMALAINWEGRKELLGLWIDQAEGAKFWMRVLSELKNRGLQDILIAVVDGLSGF  
PEAIATIFPKTEIQLCIVHMVRNSLK FVPYKDRKAVAADLKALYASPSEE AALAALDIFA  
AKWDSRFP MISRSWRMRWPEVVTYFKFPEIIRKAIYTTNAIESLNYTVRKVTRNRLSFPS  
AEAAMKLVFMA LQNISKKWTMPIHEWKSALGQFIIFYGDRVPL\*

>SPBIB\_v1\_350044|ID:27164030| conserved protein of unknown function [Uncultured spirochete bib]  
MNNAVYTKFVIGSSRLIKRDISASIRQLFDLSKRENRPFG EVLQYYAIERFLFRLSKSK  
YADR FILKGALLSVWHSEVLRSTMDIDLLGRLENSEETITAAIQ AILEQNVIDDGIVYH  
ASTITTEAISEDARYRGIRVSFEATLAVAKIRLKIDIGFGDSMYPAPQSQEFPVLLDQEA  
PHLLCYSRENAIAEKFEAMVKLG NLSRMKDFFDI WLLSRYFSFDQAILAKALKLTFTQR  
ETKMDTSV VFSPEFSSLKQVQWEAFRKRQKLSYSPAQFSEVVNSLSRFLPCVSSEMADV  
GEAMIWKPRGPWERKVKE\*

>SPBIB\_v1\_350045|ID:27164031| transposase (fragment) [Uncultured spirochete bib]  
MRKVTNAKASAILQGMQDREL YEKLLGLKEPWSVENVTLDLPSATVTVAISHPKGAKFPC  
PVCGTERPIYDHQRRWRHLDT CGFTTILEAEVPRIQCPEHG VKQVNV PWGEPGSRFTAL  
FEAIAISLLKVASFS DVARHLRISWDAASGIMERA VRRGLARREAQPLRRXXXDETSFQK  
RXEYVTVVFDQERS CVVDVLDGRKKETLKTWLAANQNALGTLESVSMMDMXDAYIXAVRXX

>SPBIB\_v1\_350046|ID:27164032| protein of unknown function [Uncultured spirochete bib]  
MAFRAQELCCRLDPPGARCLQVASSKRTECRIRGTFAQPGMFGPRQWAFLSPLFEFPVF

LG AHLVDR LIEVLRHMKPVK TDFLX AIGXX

>SPBIB\_v1\_350047|ID:27164033| protein of unknown function [Uncultured spirochete bib]  
MGGDFVREELLSVQFKTMLQHACDMYCEIMCYAPPDTKSYGNSEIAQALSDGRVAMAVS  
WGGQAAPIVKAGRNNGIEFSITPLATSWNATWGIGIISAIDSARAAQVLCMLLELMDKHL  
DRLVAEYAGSPVRISTYASAEINEKCPWLKAQLEMIQNARHLPSSDSSLVESV NKIGERIA  
KAVHGAE\*

>SPBIB\_v1\_350048|ID:27164034| Helicase domain protein [Uncultured spirochete bib]  
MIHRYV FQRSR SMPGKR FLEERLTGATGYDRIAGYFDTSLFELAGEALEQVQGSIRIICN  
SDIRARDVEAAAAAAREQAQRLSFFKHDPEDLAKGGS DRIARLARLLSGQGTAKLEVRVL  
PDDVFLI HGKAGVMRYADGRRTSFLGSANETFAGWALNYELVWEDDSDEACDWVQQEFD  
RLWSHPLAMPLSKAVVQEVERLSRRT EVRLEDWKKNP DAGGVA VESPVYREQFGLWPHQK  
YFVSQA WKAHQAHGARFVLADQVGLGKT VQLGMVAQLIALSSEKPV LALLPKTLMEQWQV  
ELWDL LQVPSARWNGTAWVDEESHEYQPRGRDPILACPRKIGLISQGLIVHSPESLQCLL  
EREWSCVIVDEAHHARRRKL PAPERGPAIRNP DTECNRLY AFLFKLASKTESM LLATAT  
PVQLHP IEAWDLLYLLSQNNPHVLGDVGSFWLDPEKALPVVLGEAELPQEA AEIWPWLKN  
PFPSPWESPHAKRLRLDAHMSERTAVCGLSFHEL RPAARTWASSLCSVFFDQHMPFVRNI  
IRRTRSYLESTINPATREPYLTLIGIELFGED EPIPVTGYLANAYQEAEAFCLT LSQRIR  
AAGFLK TLLRRIGSSIEAGRRTVAAMLARSQAPL TEDDEANEPENNGQEVQTETLSALY  
PLTEKETEILQRCASLLEASEEDPKWQVILHFLKDEGWAE EGCILFSQYYDTAYWVARLL  
STAFPDLPIGLYAGADKSM LIHQGRELRKERTELKRMVKEHEL SILVGTDAASEGLNLQT  
MGTLINIDL PWNPTKLEQRKGRIQRIGQKRESVKILNLR YKDSVEDRVHQVLAGRLQDIY  
RLFGQIPDVLEDVWIDIALGEVEKAKQELDRLPHRNPFDERYGRIDS VADWERCAEVVNR  
IEKIEVLKQGW\*

>SPBIB\_v1\_350049|ID:27164035| ATPase AAA [Uncultured spirochete bib]  
MREERIR SILTGGEHETVEFKQALTQVPESLYETIC AFLNHKGGDILLGVDDD GQVIGIP  
EDKADAFCLDIANATNNNTLFSPPYLLYPQKLLFEGK WIIAVQVPES SQVHRLRNMVYSR  
GASGDYRVTVP EHIKIVNRKRTFYSEAKVYPYLHVSDLDEKTLQKTRERIRNIRPNHPW  
LDLSTEDFLRKAGLYCRDLETGTEGLCLAAALLFGKEETILN ILPFYKIDALLKRSNVDR  
YDDRCYVQSNII EAYLQLMEFIERHLPDPFYLEGDVRISLRDKIFREL VANLLVHREYTK  
ADQTRIL IYQDRVEFSNPCIPHWRGRIDPSSVVPFQKNPLLSKMFLQLGWVVEIGSGLMN  
VMKYLPLYTRSGHAEILEYEDFRVIVYLEAAPQATPQATPQATPQATPQAPSDRIATILE  
FCKIPRSREEIQDMLGLKDREHFRKEILEPLIITGKLELTIPDKPRSPHQKYVTKGYTP\*

>SPBIB\_v1\_350050|ID:27164036| conserved protein of unknown function [Uncultured spirochete bib]  
MPHTPFIEIQFPLARLSAESYKERKANLGQTLTGLGKWWGRKPLILVRASLLGLLMPASD  
DPEKDRQIYYKILTMDEDGLWRRKTKTMSAADIAQRLEPREYEGLIERK GSTASWVRGVA  
KADKERLERIAFARLPYEDKLA YCCRPEEIDGPSPEAWKDIN AHLG TSAHSLPELFEQLS  
QKAFGHRARV GDCFCGGGSVPFEAARL GLEAYGSDLNPVA VLLTWGAINLIGGGKDVQEE  
VRAQEA VVWQKVDEQITAWGIEHDGRGNRADAYLYCVEAKCPATGLWVPLAPSWVISEKY  
RVVA VLR CN DARQGYDIDIIS GASDDQMRRAKQGT VKDSEMIDPEDPSRRYSIASLRGDR  
RGPNGETIYGLRLWENENFVPQDDIFQERLYCVRWVTPQGERIYMAVTEEDLARERKVL  
ELLKERFAEWQEKGYIPSKKITEG VETSRLFRERGW TYWHHLFNPRQLLVHGLFHYFSDN  
INKTRYNIFSMGRIADWNSRLSGWMPHEGNAKGNNTFY NQSLNTL FNSTRPV LKLDTNW  
FINFDKAVYFAKRKTITL MPLDARDV TYTADLWITDP PYADAVNYHELADFFLAWY EKHL  
PRLFPDWYADSR AALAVRGADEDFK KSMVEIYANLARHMPDDGLQLVMFTHQDASVWADL  
GMILWAAGLRV TAAWTIGTETSSGLKQGNVYVQGT VCLVLRKRLEQRRAWIDELYPQVEDE  
VKRQLDAMQAIDDTLQPQFGDTDYQLAAYA AALRVLTSYDSIEGRDITHELFRTRAKNEA  
SEFERIIDRAVSIATNYRIPRGISSFSWRNLEAIERLYLAGLELERH GELRQGAYQELAR  
GFGVAEYKFL LGDAGANQARFKTPSELKRLYLSASQNSNDKGTGAF AASLLRHLLFAIHE  
AVRTENPREGLNYLKAERLDYWSRREDLINLLDYLA AARNLSALTYWEKDAESAGLLAGL  
VRNDYVGSR\*

>SPBIB\_v1\_350051|ID:27164037| SMC domain protein [Uncultured spirochete bib]  
MISRIQLSNFKT FEALDIEVGPV TLLIGPNNTGKTTVLQAL TLWDIALR KWWEQKALSSA  
RTRTGVTINRQDLFAIPIPEARLLWYNLHTRSGMTSNANVFMTMRLEGITENKQWHAALE  
FYYANPESLYARPVKGEDDPENLKLALKESFSYLPPMSGLSSSEERLEEGSIKRRIGEGR

TAEVLRNLLWKIYNKEETKWKDLTSAIKKHFGTEVLPPVYNPATSLISCRIRESGKPEMD  
LTASGRGFQQALLLSFSLHSQPYTVLLLDEPDAHLEILRQKSLYMALASEVKAKNAQMLI  
ATHSEAILDLASQNDTIIAFIGRPHQSKKSELKKALIEIPYSEYLSAEQTGTILYLEGT  
TDLEFLRAFAEVLQHPVREKLERPCVKYLNNDMDLARSNFNGLKEALPDLRGLITDNL  
QKIHMPGLVHMQWERNEIECYLPLPHVLERYFAGATPDSPLFETQTMGTLKRIIEDQ  
TPPAALRDMQDDFWKETKISDKWLGTVLKKYYAELGLPVQINKGDYFLFARHARPEELDK  
EIIKKLDILNDFLA\*

>SPBIB\_v1\_350052|ID:27164038| conserved protein of unknown function [Uncultured spirochete bib]  
VKAKLPGFGFDPEKHAHFFAVIFPSASKGESTIKVIEHFEWPGGEVPDDTTISFDNRDLKV  
FIKREFFNEVADAIKAEFNRLTAHGLPTGRWPARGGTALLSASFGKELLLLWAIEDAS  
TSDIQNAVHNWLGLSPEERWWLYTMTNAATGQALAGRNRGWRKAVRFALCENPVSGVIIR  
KRLALEPSLFEEVEE\*

>SPBIB\_v1\_350053|ID:27164039| conserved protein of unknown function [Uncultured spirochete bib]  
MTIFDNCKPRQSVFDRTRRDTVLNLSDFLEGKLDQAAEQFFTENFVTAGMKMLIQKSF  
RLSGTHDQPSAYLLSQAMGGGKTHSMIVLGLLARFPYLRAKLGHDFHLGSRPYKVIQFDG  
RESDYPIGLWGALAEQMGKRELFNPLYSPLQAPGVTSWVNLLKGEPVILLDELPPYFNN  
ARSIQIGASNLAEVTATALSPLLVAANKEELSNVIVISDLSSTAYEAGTGFINQALENF  
RQETRRNVPIEPVATQGDEIFHILRTRIFESLPDTSVRDEVARHYAQAVENAKQMELTA  
ESPASFAALLRESYPFHYSRLDYGRFKANAGFQQTRGLLRMLRAVVANLWESERAKQLE  
LIHPYDIDLNDQEIFSEFSTINPNLNEAVRVDIANHGTSHAEELDTKLGGGTQAQDAAKL  
LYVASLSTAQNPELGLRDSSELIAWLCRPGHDIRMRTDVLEQLPASAWYLHVSNDGRFYF  
KNVRNLAATLHGYYVESYTQETRIKELREYLKSLFKPNRSDVYQDCLALPTWEEVQPAQDR  
TILVITEPYPIHVSDQIPLHPLDRLYENLEYKNRIIFLTGDRDTMNEVLKNAALLKAIR  
TILAEQETEKLSERDPQRIEAKKNEDRILINLRSSIQQTYSVVVYPSSDKLRKEIRFNF  
DSNNYDGEAQIRAALLNARKFSEDGTGNLDSWIAKVEERLFDNQNPNVRWKDVKARAAGKTN  
WQLHLPRLLDDIKAHAIRTGKWREEGEYVRKGPFAKEPTS VNVQVKSRRNDDTGKVTDIR  
PVGGTKVLYEIGDSRPTTASEAVPNYSAFETGELKLTFLCVDENDPAREAKPVVWKNRIS  
LKSRIFEQAGERFIELIAPANAFYTTNGSDPRSKGASYAGAFPIPKGCRLVQAIARKD  
DIESELLRRDVTQAEQVSVDPLKPLVWKTGRFQNLTTADAWQLITRLTEYGAQADGITIY  
FELPDTGEEINYSPEGIQKNGEAIRAILDLVGNFAGNVNISMVQRIHFSGQDFLDW  
ANKDRIPYDINSEVRQ\*

>SPBIB\_v1\_350054|ID:27164040| conserved protein of unknown function [Uncultured spirochete bib]  
MRFYLAAMDNDWFRYLRLSQVPEDINFWQPSGKKPANLAKGEPFLFKLHAPFNRIAGLG  
FFSAFATFPLGLVWEAFGERNGCDTLQALSRIKIAHYQGIRGEYDPRRLVVCNILTDPVF  
FNDSEMIDAPLDWSSNIVRGKYDTEEA VGARLWDQVMQRLEARRFLEREAVGEIGTASV  
VVPEPQWREVIKVRVGGAFRFMVTEAYRRACAVTADHTLPVLEAAHIKPFSEHGPHLV  
SNGLLL RADLHKLFDDEGYMTVTPDYHIEISKALKEDFNNGKIYYAFHGQQLANLPENPAD  
RPSREFLQWHNEVAFKVG\*

>SPBIB\_v1\_350055|ID:27164041| protein of unknown function [Uncultured spirochete bib]  
MHTECRSTRVLSGYSRPAVLVAVLLSGCALFQPYRNVTAYPPDSKPQWQDINSAAQICR  
VYLDYPLSIHAVKVDLQAQNLNIAVYPLAASEAGEGTSLSKKVSTFAKENHCFVAVNAN  
PFAPSSATEGDLRTITGICVANGNTVILIVIDGRTSESVGATEEEVALWMRYFGADDAIT  
LDGGGSSAMAILDGTIVLENVPVHGNVPGVERAVATCIGFALRE\*

>SPBIB\_v1\_350056|ID:27164042| conserved protein of unknown function [Uncultured spirochete bib]  
MSAQDVRWIQRFNHFSKAFALQEAVELSKQRKLTKLEEGLIQTFEYTHEMAWNTLKDF  
LEERGTKKLYGSKDATREAFKTGLIENGEIWMNMIESRNLTSHTYNEETATEVISAILHS  
YFAEFSDFHARMQELKEERE\*

>SPBIB\_v1\_350057|ID:27164043| DNA polymerase, beta domain protein region [Uncultured spirochete bib]  
MTARFGLKETTIIKHSVFEKYPQVEQAILYGSRAKGNRNGSDIDLTLVGGDELTMNVL  
YQIMDELDDLLLPTFDISYRDISDSVDRDHILRVGAVFYQRAAEPTHF\*

>SPBIB\_v1\_350058|ID:27164044| conserved protein of unknown function [Uncultured spirochete bib]  
MVPTKMDLDQIAKEEAELVLDQFTEEDA WELGCLMVEEAKKRQARIAIDIRPGQIMFHA  
ALAGATPDNDEWIRKSNVFRFGKASLAVGVSLALAETTIEQKSFVSPLEFSPHGGAFP  
IRVRGCGLVACATVSGLPQEEDHALVVACIRKFKERKTPR\*



>SPBIB\_v1\_350059|ID:27164045| Glycoside hydrolase family 13 domain protein [Uncultured spirochete bib]  
MNTQEIRKQKTRLCIIVGIVALILTACAFQPKIEEPSPLANYQTVEPGTIENMGNPKMEF  
IVPAHDALKPAADDIVIIYYRNDGNYEPWGFWLWAIPGGDGALVWEKTKNLEVIGNVGYL  
RFFKKGSTFGVNVIGSSGMFGLIPRKDSAWEKDGQDRIIDSRAGNEWVVFQGDQKTYHY  
GPYVPSIEAARLISPNEIVLDSLGRYGLSLEPGPSGFSVRYADGSGEIAVVDAVNNADPA  
NRKNYARRVKLTLGEEVRLDRPIEVVHPSFLAPTTVNTSGLAATMADNIVPPEGFKLGA  
IYDAVHKSVEFRLWSPFASRVARLYRTSLASTADYSLDLAKDPNTGVWQGSFDSVDPDG  
FFYEYSVFFGNKENIVLDPYALSMDAFTGQGPGRGAIVDPSKAQPEGGWQGYTDYQLEKR  
EDAIIEISVRDFTIAPDAGTKARPGSFLAFVEKLPYLKELGVTHIQLMPVLNFYNNEL  
ETAYEATGRANNNNYNWGYDPHNYFTPEGWFSSNRPDPYARMRELKTLIKEIHKAGMGVI  
LDVVYNHTATPSILDDIVPGYYYRRDAKGDLTNNSGCGNDVATEREMASRLICDSLYYLA  
DEYKVDGFRFDLMGLIDVNTLLKARAAISAIPGKEDILFEGEGWKMYHGPALTMVNQDYM  
TQTNEVSVFNDEFRDILKGGGLNDRTKGLVTGRPVNTSLVFNNLAGRPMLYYKADDPGDS  
MNYVSAHDNLTADNIAFNVGLSPKYPEERAEIAARAKLANFFVLTGQPIAFLHGGCERG  
RSKPKNSTSEVIGEYVHNSYDASDDINQFPWTVPSEYAAMA EWVKGLIAIRKAEPGLHI  
GDAATISSAMKQIPHADQLSMGWTVNYGGTTLAMLVNANFDTSIDFDVGIDLSKAVVLVD  
ADEASPQGVSKPSGIQVSGTKATVAPLTA VMLKLLTP\*

>SPBIB\_v1\_350060|ID:27164046| Pullulanase, type I (fragment) [Uncultured spirochete bib]  
MNQNWKEFLTIDIAPGENRRIAWADKVGGLDLMSASPCAGEGYVHGQESRLKDVLEVSG  
RTIRSRNLCHVQVLPGEVAFSKEKAGGTKNILRLALLMEADAFWIELDTSQASERADGPT  
SADAFAIESDGNRGTVEGGGRSVCLVLPEAQAGEADWPQPHE YRYTAFSLWASAGIEIAI  
ASRQPF AIDQSPLESEVQIPHGFGTIRVEFSVPRDAYGADVPGRLAGHNHTLYIAWGKNA  
EEALTRALQLAAEDA IQHHRAATSDILSSMDIATGNDEFDKALRWAAFSGWSLVTREYGL  
GIWAGLPWFRDNWGRDFTIALPGILLVTGHFAEAREIIRTFANRQNTDPTSPDFGRIPNR  
WRSPDDVIFNTADGTLWFIREVWEYVQYTGDTAFALEMKPFLDRALTADITRSDEHGFLQ  
HGDADTWMDARIRGKEAWSRGRDRAVEIQALFYTALLCGARIAELAGDFGHA AHYREAAS  
KLRSSFLHYFWRPEANRLADRLYSHSEEADLRVRPNGCIALAASAILPEEQALLPIEIEA  
VVLADCVSRLVYPYGVASLWQEDPLFHGRHDGSPLYHKDAA YHNGTIWGWNA GPVIQELL  
KFGQISLAQSLAAELARQILHDGAAGTMSENLDAMP GPDPGKVPVSGAYSQAWSVSEFVRT  
AFQSFLGFMPRLADGELIAAPYPGFSGTVKFGTDQQLYIAASRGNSIFEYQIEWLGEIGA  
DSSLELHLHIATNKGIKAAPIRQGGQLHLRYDEASGKMHSVSSYPPLKQAHSVIETRL  
VIPIQPAFKNLHFASPHLPPWNKPAREPQYLERIILGSADTANPAVYLIKRC\*

>SPBIB\_v1\_350061|ID:27164047| Alpha amylase catalytic region [Uncultured spirochete bib]  
MKRLGAFLLVAIALLSPLAQESGQLWWKDALGPAYQVLIYSFADSDGDYGD IKGLTNA  
LNYLNDGNPFGGNDLGISAIWLSPINSASSYHGYDVKDYKAIDPRLGTMEDFEHFVADAH  
SRGIKILD MFVNHTSREHPWFLDAMRSASSPYVAYYRTKQPGTQYGS GGMGRFYRYTRP  
DGSVFEYFSAFWEGMPDLNLDNTD VVNELKDILAFWIGKGVDFRFDAAKHA FDPNEMPA  
GTPTLALNKSFWNDLRRYCRRIKPDVMFIGEVLTESSAEIAAYASVFDGLDFPAARLTI  
DAVNRMGPGAFPN SYLNNYRQYQRIPSFQPLPLTNHDQDRAMSTLLSGLGLNATAGAEP  
ESGDNQATLAAKALALTKAKLAA AISQTLPLPLPFVYYGEELGMTGIRYQND DISRRDGL  
WTSHPGIPNTDWAKKSGKAVPGQNRLTSPLDIQLQNPESLANFYGSL SLLRAASPAIRRG  
GYVPVSWPGFDNASILAWLRGDDAQTVLVIHNLGTPFHAATPEGIQLRLLWASDEELSR  
SAGLKTSQAALDVTVPAESSAVFEVLKP\*

>SPBIB\_v1\_350062|ID:27164048| ABC-type transporter, integral membrane subunit [Uncultured spirochete bib]  
MNASITIVSGKLSRRAKARRTGLKIFQYTWLVL TCLVVLVPILWMIVASFTRGKLLSGVP  
LLPNFKNFSLEHYTYLFTYKSSQSGARFSDFVASFLRSL SIAVVNTAAVVLLSSMTGFVFA  
RFRFRGKKSLLVSFLLLQMFPSFMGMIAIFMIFRTFGWLNKPLYLVFIYAAGAIPYNTYL  
IRGYMRSISLSIDEAAMIDGASKTQVFFKIILPLSGSIIGFVAVNAFMAPWMDYMLPNQL  
LDMQNQTVAIFLYRLTDPFITMYYNPLNFMAGALLATPITLVQFYMQR FIVYGMTAGAE  
KG\*

>SPBIB\_v1\_350063|ID:27164049| ABC-type transporter, integral membrane subunit [Uncultured spirochete bib]  
MANAPIATNKPKSWKAKPLAVGIASLLVPGLGQWLN RQRLKALIWFFIPLFILAIELGSS  
QWGRYLELKQKGKVPPEALATAAYQNASATQEETSSQSDYMSALFGDSGQEGQTAGSGDPF  
ADSTNAQENNTPAGSGDPFAQAAVSEENNKPGSTSEAKGADAEQGN YFNATYVYPNYRPG

EPHYPIRDFGGFFTRGIWGLVTLGRLVIDQPYAGGYIELYNKISPWLSADNSIVLLGNGL  
ICLAVLLILGLLWVLGAIDAYSTRKRILSSGQVERFSAFWKRTWDSLYVYIVSAPAFVLI  
IMFTVIPIFFTFLAFTNYTYKIKLGAKLIEWVGFGTFSYLAVDPGWLSIFGQIFLWTIF  
WAFMSSFTVYALGFVNAMIVESPLVRYKKFWRTIMILPWAIPSLVSLMMFRNAFDKDGLV  
NQFLFATGLMEPVSKLLFNIGLAGQADQPIFWFQPIYNGKLARFVVILVNLWLGAPYHMM  
MIIGVLSTIPKELYEAAIDGASGSQRFRYITLPMVLSATVPALIMTFSFNFNNGAVYF  
LTGGGPVWDPKVPDSMRIVGSAMPGQTDILISWIYKLSFTKGFEQYNVA AVYSIIIFMI  
VGGFSVFNLLRSKSFREEAGE\*

>SPBIB\_v1\_350064|ID:27164050| conserved exported protein of unknown function [Uncultured spirochete bib]  
MKRRMAFVMVLILIGTSVFAQSKAVWDAKNRQFQIEKGAKIRLGVDNDKVGAAIVQLWDQ  
LHPEAKGIVEYMNLGAAGSADQITQLQGDAPDVVLAIDGEVSRNAQSLPLHKVIADAAK  
SFAVEPFFSGANSMAVKFIPVAYDGMTFAWNKTMMDALKLDTKDANKDGLPDAFDTWEE  
IFALAKKWQTSRPTYK GKPV TIVYPMCLDEVWSGYSNLTAGGWEIFPKADPANPGFDQDS  
FRAGLEFIKAAADAMISVEVNGARTPAASMVWRWDDALNNETAPFFLVGTWMDVNGAETK  
GGYDIKFGPMPTWNGKRLTPFVKTKGWIINGFTKYPSAAHEL YRIL YTRDGLQAMVNNSS  
YIPALKPNATNTPSYRDDPNKAEMAKAFANYPEPSITLPKNPAKKAMDGYYGIGVNLEL  
RDTWDGKKTAEQAANLINLYNKWYEENNK\*

>SPBIB\_v1\_350065|ID:27164051|nplT| Neopullulanase [Uncultured spirochete bib]  
MNVAAIYHRSTDAFCYSPDGRSLVIRIQTASDDIESVEVWVGDPYEWQRINQESIQA VVQC  
VRIKANRIGSNGLSDYWEARWVPPYKRARYAFRLYGRDGSICDLGEKGLVRIDPADRDPK  
IDYWNSFLFPYIHQTDTRAPAWVASTVWYQIFPERFRNGNPNNDPPGTPKWSRGPVQNR  
EFYGGDIEGIIQGLDHIEALGCNGIYLTPIFASPSAHKYD TTDYFCIDPSFGTEEDLKRL  
VDVCKAKGIRIILDAVFNHAGKEFGPWKDLVERGPDSVYRDWFRIRDFPLFSPGQDSGDS  
RHTNFETFGFTTRMPKLNTPETREYLLEVAVKYVRDFGIDGWRLDVANEIDHEFWREF  
RKRKAVNPDAYIVGEIWHDAMPWLRGDQHDAMNYPFSAITDFVLGNAWALTGKDFLH  
RINAISFSYPDTVLQSTFNLLDSDHTDRIVTRFQDRELAKIALCLLFALPGSPCLYYGTE  
YALEGSRDPDCRRCMIWDPQPDEKEFERFVASLVNLRRTWWKTFAYGTRESSFNDSFPGF  
VALIIHDDAMRLALLVNRDTS AVPEAAWRDALGLHSSAPVEVILASQPFAGFLGGRSAVY  
LHM\*

>SPBIB\_v1\_350066|ID:27164052| conserved exported protein of unknown function [Uncultured spirochete bib]  
MRKILSFIAAFLILGGIVFADVS VKEVGDGKVEVTFFFGSTKANQVVIAGDWDTDWQNGAI  
PMTKVENGWEYKIVVPANTVMKYKFIADGTWIFDIKAPDKIDDGFGGFNGLVDVAELLAA  
KKGTTTAAAAPASGGSKLRFQ TWSMVG TQAKFDTTNMEVQSAGVGVKSYFKISGNALP  
SMPIYAEIALAENDGFENLYKKGSLAFSDGLTNLLVDTIFDPIYYIDGQRKAATYLGHLK  
LGFSDSYVNFVTGYKYAKLPGHTNVSWITVDSEWEAGWNETGGFAVFSLGPALRKIGDWT  
VNATIGPNKTADRAGNQYGLFSYATLQANANHYFDFQYNGAFGTTYKTIFDEIYEADFIGG  
YAGKFDPVTIKANALYNLWGANVINDSYITAYNPSTSDVSGAKQGLGFLPNFAANTQVAY  
AGDYFGTTLGYRLRGFQANMMYVEQGADGHTHLVDQLGALNSQRVWLDVFAYPLD TL SVG  
LYGYVDLVLDKTA AKLPYNDKDNIQLYAKPSFELKLD R VFDIKTTLNGYVKLTYNTATAD  
QFTRGTNTSQFLFEGGLKLSMADVSKTVKIDLYYGF DNNNANYLFNTLIGAVKLPSDL  
TLQGGAGLRTPNAGVAASSSPFGFFVGVAQKFKALQKPTAYA QFVYNMDPYNDFGSGPSS  
FNLNDFVTYNGVNNYVGTA AVRIGLHWDL\*

>SPBIB\_v1\_350067|ID:27164053| conserved exported protein of unknown function [Uncultured spirochete bib]  
MKRIMFTLAVLMAVIALTGCPHQHTQVYPAYSLPIKQNVSTTTNTAAIQVTATETANSYS  
KYTVTINKNLVADVGGKFFVAGASIGSTSSNIGDNWNVTASSVTDAGLVGTVDNTGTFSIV  
FYGKAPSWGNAADGAQFKICIYDDPSWNLVLGDAGGNFYVAGSTGNDIELTIDPNKL\*

>SPBIB\_v1\_350068|ID:27164054| putative Lipolytic protein G-D-S-L family [Uncultured spirochete bib]  
MYANEVCLFGDSIARGVILDACGSYKPIRESFAFLAASELGFSLINKARFGCTIAKGREI  
IERFLGRNAAVTTCSASLADPAGISRAPSVPQTATNIMPENASPNVAIHIRTDNSHAADS  
SRPRLAFLEFGGNDCDFRWDEISADPHREHLPATTPERFFHMYGEVLQMLKQNGFKPVLM  
TLPLNAERYFAWFTRAGLDQAAILSWLGDVQFIYRWHESSAIWEIGEAHNVPVNNIR  
KAFLEQRNYSRFLCKDGIHPNTEGHRLITSEIIFKAQE HMSV\*

>SPBIB\_v1\_350069|ID:27164055| conserved protein of unknown function [Uncultured spirochete bib]  
MDEKAYEAVKAYLDALLAGKPPAWEQLPDISLYMDQVVSYLERQLGGLFAAEDERAITPS

MINNYVKAKIVPRAESKKYNQEHIALLLSIFTLKRALSVQDLGALLDGKPEAGSYREFYE  
LFRKALIECAASTAEIFAGLGIKKSERALSGEAEKANIANIDESKLRELALKLAVEAS  
LRSLAAERLLAIARSRELSGTQKPSSSRALSAAQEPSGRREAKKG\*

>SPBIB\_v1\_350070|ID:27164056| conserved membrane protein of unknown function [Uncultured spirochete bib]  
MRTKIIAILLALCTLFLSSCLPGDGKNTVDRPANFLTGIWHGWIAPIISLIVSIFNGKIR  
IYEVNNTGWYDAGFYMAVISGFGGLAVSRRKRRREE\*

>SPBIB\_v1\_360001|ID:27164057|leuA| 2-isopropylmalate synthase [Uncultured spirochete bib]  
MARKIYIFDITLTDGEQAPRCMNLAEKLEVARQLEKLGVDIMEAGFPAASPGDAAAVRE  
IARTVKNVRVAALARALEKDIDTAWAIRKAESPRIHTFIATSPIHMEYKLRMAPEQVIE  
AAAAAVRYAKHYSSDVEFSAEDASRSEPDFLCRIFSAIDAGATVINIPDVTGYAIPPEEF  
ARLVAYIKANTPNIDRAMISVHCHNDLGLAVANSLAALRAGADQVECTVNGLGERAGNAA  
LEEIVMALRTRRDFDLATGLDTAQIFSTSRVSKVTGVSQINKAIVGENAFAHEAGIH  
QHGVLANRQTYEIMTPESIGLPQNSLVLGKHSGRHAFEERLKYLGFDLDSARIDELFAQF  
KILADKKKTVTDRDIEALARGASGTIPETYKLERFAVQSGTQLAATCTIRLARKDGSVYE  
KAAVGDGPVDAAFKAIDEIVGRTLELEDLSSVTSGEDAQGEATVVKVFEGRTWNGHGV  
STDILEASIKAYLAAINTMEWEMAVYE\*

>SPBIB\_v1\_360002|ID:27164058|leuC| 3-isopropylmalate dehydratase large subunit [Uncultured spirochete bib]  
MNDTAYTEKAMTMTQKILATKAGLKAVEAGQLIEAKLDLVLGNDVTAPPAIGEFEKLSCT  
RVFDPEKVALVPDHFTPNKDIKTAEQTLKMRQFARAQNVAHYFEVGMGIEHALLPEQGL  
VTAGDCIIGADSHCTYGA VGAFATGVGSTDLCAMATGTTWFKVPSAIRVELSGTPRGW  
VSGKDVVLHLIGRIGVDGARYKSLEFSGAGVGHMDFRFTIANMAIEAGAKNGMFPVDE  
HTRTYLAYVGAKEPVVYAADPGAFYDDIVRIDLGAVPLTVSLPHLPSNTRAIIEVEGMPI  
DQVVIGSCTNGRISDLRVAQAQILKGRKVAKGLRCIIFPATQRIYLEALREGLIETFIEAG  
AVVSTPTCGPCLGGHMGILAKGERAVSTTNRNFVGRMGHTQSEVILAGPAVAASAVAGK  
LASPEKVSDAVPDRAWLYRM\*

>SPBIB\_v1\_360003|ID:27164059| 3-isopropylmalate dehydratase small subunit 1 (modular protein) [Uncultured  
spirochete bib]  
MQQGQKQSEHMSEYGNQRKGGQSTFSAKTGAQILRGTVHAYGDNVDTDVIIPARYLTTS  
DPAELAAHCMEDIDREFLKKVKPGDIMVAGENFGCGSSREHAPLAIKAAGISCVIAASFA  
RIFYRNAINIGLAILESPEAARALSDGDEVAVNFESGEIRSVKDGAIWKAQPPFPFIREI  
IEAGGLVEATKRRLAVRQRDYGAEAYQPATRTKDAL\*

>SPBIB\_v1\_360004|ID:27164060|leuB| 3-isopropylmalate dehydrogenase [Uncultured spirochete bib]  
MNYRIGIVRGDGIGPEVVGAAALGVLEAVGARFGHAFAKEELLAGGCAIDASGEPLPEETV  
ARAKACDAVLLGAVGGPKWDTLPSHLRPEKALLGLRSALRVYANLRPAVLLAPLREACPL  
KDEIVGSGFDILIVRELTGGIYFGKSGRTEDGQAAFDTEFYTRKEIERILRVGYEAARKR  
RLRLCLVDKANILESSRLWREVNARISAEYDPVETSAMYVDNCAMQLVRAPGQFDVIVTS  
NMFGDILSDEASMLTGSIGMLPSASIGEPGAPGKPTMGLYEPIHGSAPDIAGKDIANPLG  
TILSVAMMLRYSFNLNKEAEAVEQAVARVLEAGWRTADIALHKVESTTRIVGTKEMGRLV  
AKEVQRSRI\*

>SPBIB\_v1\_360005|ID:27164061| AzlC family protein [Uncultured spirochete bib]  
MESSRSGKRRVVLAAAFKASIPVLLGYTTLGLAFGFTLVAAGLPWWMSPVMAIFIYAGAA  
QFMGIGLITGGAGLFEIALLTLLNNGRHAVYGLSMLEQFKSAGKWKPYLIFGLTDETYGL  
LTTVKPPAHVEQARFYAAVTALNQSYWVLGCTVGSLLGSALAFDARGMDFALTALFIVLL  
VEQVRAVQRFEFYVAAFAACILALFIAAPRDFLLVALLFATGLLSLLRPRLDGRKPAPAS  
TQGPQGGGEAQ\*

>SPBIB\_v1\_360006|ID:27164062| Branched-chain amino acid transport [Uncultured spirochete bib]  
MTRLFAIVVIMTLVTFFFTRAVPFLFFSRTKPPAFLDYLRQYIPPVVMITLVFASYKDIEF  
TQTPFGIPAAAAGVLTALLHIWKRNVLVSIAGGTAVYMLVLRVL\*

>SPBIB\_v1\_360007|ID:27164063| putative acetyltransferase [Uncultured spirochete bib]  
MEIRKGSIEDVPAWFELVYAVKSENLPFLFEMTTPITLESSYRYMEKILSVDGSEVLCIF  
DGSKAVGSLDCLRKERKEENHVASIGMCVAKASRGQGIGRRLLSLFEICKQEKKIEKIE  
LDVFSNNPGAIALYKSLGFELEGVKKGSIRKDGAEIDLICMGKFLY\*

>SPBIB\_v1\_360008|ID:27164064| putative alkylmercury lyase [Uncultured spirochete bib]  
MGTMNITFLYFNGCPNSEPTLENLKTALAELENFADLSIIEVKDPQQAASLGLGSPSIL

VEGRDLETGRPPAGSAFSCRIYEIEGRRTGRLPKDYIKARLQSLAQTGL\*

>SPBIB\_v1\_360009|ID:27164065| putative reductase [Uncultured spirochete bib]

MLKIAVIIGSTRPGRNGEAVGRWVYEQAKKRSDAQFELVDVKDFNLPLLDEPVPTSMHQY  
TQEHTKKWSEKISGFDGFVFTPEYNHATTGALKNALDYLWTEWNNKAAGFVGYGSMGGA  
RAIENLRLIMGELQVADVRAAVYLSLFTDFENFSVFKPLPNREAELNTMLDQLVAWAEAL  
KAIRT\*

>SPBIB\_v1\_360010|ID:27164066|ppiB| peptidyl-prolyl cis-trans isomerase B (rotamase B) [Uncultured spirochete bib]

MANPIVTFKTSKGDISEVFEEDNPITAAANFLEYVKLGFYDGTIFHRVIPGFVIQGGGFA  
PGMEQKKTRAPIVNEASKAPPNARGTLSMARTSVPDSATSQFFINLVDNKSLDYRGPAG  
AGYCVFGRVTEGLDVDAIAQVKTGRRPPHADVPVEDVVLISAKVV\*

>SPBIB\_v1\_360011|ID:27164067| conserved exported protein of unknown function [Uncultured spirochete bib]

MKPNQSFSGSIVVCMGSSCYARGNIYTVHEIQSWLARHGLSASVELSGSLCGGRCKEGPVI  
IINGKVYTNVMPETIEDILVHEFEKAGDPELVQPDSTCSNTSAGDSWRVDP\*

>SPBIB\_v1\_360012|ID:27164068| conserved protein of unknown function [Uncultured spirochete bib]

MNRQVIYTETMRCQDCYKCVRECPVKAIQILDGHARVVEDICILCGHCVMPQSAKKVR  
SDVERVRRLELKPVAVASLAPSFAAEFSGCTAGQLIASIRKLGFAAVSETALGADLVSS  
AMRNELGQLADNGRNFLIGAACPAVVRYVSFYRPDLVPFLSENGSPMIAHARYLRSRFG  
NALVVFIPGCIKKKEADESGGLVNAVLTFAELRQLFEEENIDPSAEKPTSNDTFFPQRP  
SKGELYPIEGGMIAKQHGSTDVPCMSFSGMGHIQAALRDLDPGIPETGIFLELLACEG  
GCINGPCSDASRGTVSKRMQILLYEKQGESEPFNTEIACQVKHSAKPVQRQVREEEIRA  
ALALVGKKEPSDELNCSGCGYDSCREFAKAIVIGHAETMCLSYMRLAQKKANALLRAM  
PSAAVVVNADLKVIECNEPFVRILEKDAQFVAEAKPTLEGADLRKLLPFWERFNDVLHHS  
PGDAFIESDFRCGERILHGTIFSIEKQMIAGGLFQDITAPWIQKDRVIKEAKKVIRQNV  
TVQKIAYLLGENAAESEEAALRSIIESFGGEVQ\*

>SPBIB\_v1\_360013|ID:27164069| Stage II sporulation protein E [Uncultured spirochete bib]

MIESENKPMHADFFVEIGHWQVAKYGETSEGDVFISRKTEDGRII AVLSDGLGSGIKAGV  
LAALTATIATGCSAARIPIKRTARIIMRSLPVCSEKISYATFTLVDIDTSNRIKVVEYD  
NPAYMLVRQGVVEPLRSMVSVTKGGGRIAGHPKPATLRSSRFKAIEFGDRVIFSDGVTQ  
AGMGSRNPLGWGLEGVRRFVSQMIANAIEISARDLARRIVTWALLDGDQAKDDITCAV  
VYFRAARRLAVFTGPPLHPAHDNELARLFVSSPGRTHIAGGTTATIIGRELGRKITMDLK  
HRDPELPPVASMEGADLVTEGILTLTKTADYLEQGAAPPELRQNAATAALRLMLDSIII  
FFVGTKINEAHQDPNMPVELDIRRNVKRLAHLLEGKYLKQTTIRYI\*

>SPBIB\_v1\_360014|ID:27164070| conserved protein of unknown function [Uncultured spirochete bib]

MKKVHVHTICAGTACYVLGGAELLGAIDSWIAKWGEQVEFEGTPCLGFCKSAGEAKAPYVL  
VNGLVVEHTTAEKLEEMVNSALLGTEEEASSADAAARPGNAITRKDGGYASGR\*

>SPBIB\_v1\_360015|ID:27164071| Hydrogenase large subunit domain protein [Uncultured spirochete bib]

MPREDNTTRIRRELLVRLGRLALEGTLADSIDDVPFDMTAEGWETMRCCVHHDRAILRLR  
SYALLGGDVRGMDDVRKPLSVLAEGFQNSRCQDGAELGESGRFPLQVLGEACNACAHSRY  
VVTDACQACVARPCKVNCNPKGAVTVNGRSHIDPKCVNCGLCCKSCPFHAIKVPVPC  
VCPTGAISKGEDGIARIDEAKCILCGKCLRACPFGAPIEQTYLEAASWLREQARPLIAL  
VAPATMAQFPVSSGKFMAGLYRLGFAAVAEVAEAACATAEREAELRERMHRSEGFLATS  
CCPSWVLSKALGDVAGHVLHTPSPMAIAAKWARKRYPEARIVFIGPCLAKRAEARGFPG  
EDGRKLVDAVLSAEEIGALFTAKDIQLQALEEARAVQLAEQSSLDLCYGRGFAQSGGVA  
ASVQSVLENENSRIEVGSSWTIRTLVIQGLSKQVLALALWKNQAPDADLVEVMACEGGC  
IGGPLAIAQAKSAAVFLQRYMSEPPPEAKVASSEAVEKAV\*

>SPBIB\_v1\_360016|ID:27164072|carB| carbamoyl-phosphate synthase large subunit [Uncultured spirochete bib]

MNAQNTLRKPQKVLVLGSGGLKIGQAGEFDYSGSQALKALREEGVTILINPNIAATNQTS  
EGMADATYFLPVPDFVRQVIEKERPDGILLSFGGQTALNCGLALSREGILYKYAVDVLG  
TPVEAIELTEDRKLFAEHLRTLGLKTPESKAAVSVEEAIACADEIGYPVMARAGFALGGA  
GSGICRNRRLVARCEKAFALSTQVLIEEWLGGWKEIEYEVVRDSADNCIAVCNMENIDP  
LGIHTGESIVVAPSQTLTDEEYHSLRSIALKLIRSLGIVGECNIQYALDPNSGDYRIIEV  
NARLSRSSALASKATGYPLAYVAAKLALGYSLTELNRNKVTGVTTACFEPALDYCVVKMPR  
WDLKFKAVDTQLGSEMKSVEVMAIGRNFEALQKAIRMTGISELGLRADGKLLGKSFT  
NLATALKKPTDRRLFAIYRALAEGWTVKKINSLTGIDSWFISKIATIQKCEAELAATVRT

ASRGGTSAASPSVCPPELLLRKAKRLGFS DAGIARILGCSEQEVRSWRESIGLRPAVKQID  
TLAAEYPAQTNYLYTTYCAAQN DIAPSHTSILVTGSGPYRIGSSVEFDWCAVSA AQTCHQ  
LDKKTIMVNCNPETVSTDYDICDRLYFEELSFERLMDIYEFEQPSGVLLSMGGQIANNLA  
LPLFEAGALILGTSPQSIDRAEDRHKFSRLLDELGIDQPAWKELTTIEEARAFAS TAGYP  
VLVRPSYVLSGAAMNVAWDDSLATFLGLAADVSSEHPVVISKFIENAKEIEIDAVARHG  
KLIYHAITEHIENAGVHSGDATVVFPQRLYIETVRKILRITEQIAAALNITGPFNIQFV  
ARQNHVMVIECNLRASRSFPFC SKVSRVNMIDLAVRAMLGEPVTAPPSLMYDQPWVG VKA  
AQFSFRLHGADPVLGVEMASTGEVGCIGSEFNDAFMKAMVSVGYALRGK KILLSTGPLE  
DKLDFIDSARTLAEMGCELYASRG TALFLKHFGIPVTQVHWPLEKAEPNILTMMRAREFD  
LVINIPKNNRRRELKNDFLIRMAIDLNIPLFTNIKTARQYIESLAYTRRNGIEIRAWEE  
YR\*

>SPBIB\_v1\_360017|ID:27164073|carA| Carbamoyl-phosphate synthase small chain [Uncultured spirochete bib]  
MFRKEKAAMLVLEDGTVFEGYSVGADVSSEGEVVFSTGLVGYPQSLTDPSYCGQILAF TY  
PLIGNYGVPA LKRNSHSIPLNFESDRIQVSGVVVAEASFEP SHHSTNLSFPEWLKQEGVP  
GIAGIDTRALTRLLREHGV MKGKILVEGAGLAHTNLEKADSPVKVVS VKEPIRYPAGPGA  
PKLVLVDCGVKANILRILIDSGVDVTRVPWDYPFETLEYDGLFLSNGPGDPKACTRTIAH  
LRHALTQKRPIFGICLGTQLMALAAGADTYK LKYGHRGQNQPAIERTSGRCYITSQNHGY  
AVQEASLPPGWESWFTNGNDGTVEGIRAAGAPFKA VQFHPEGCPGPRDTEFLIHQFLDEV  
QNRSAK\*

>SPBIB\_v1\_360018|ID:27164074| Auxin Efflux Carrier [Uncultured spirochete bib]  
MLSALQSVFSVILMIGLGFFLAKRRWFEGSSSALISRLVVNVALPAYMISNLMGGYDRAK  
LLDMLPGLPVPFLVMIVSYVAAMGLARLIRVQKDRRGAFQSMFALSNSVFIGLPVNVLLF  
GDASLPYALLYIANTTTFTWIGVYGI AVDGSIRKNGPRPSLVLSGLRRLSPPLLGF  
AAVIMIMLGIRLPK SIMDTCRYLGSMTTPLSMLFIGIVARVEWKALRFERDFLVILAGR  
FLVTPALMFFLVRGLDFPLLMKQVFLMQAAMPAMTQNPILAEAYGADAEYTAIGTSLTTV  
LSMLSIPYMTLVGVLF\*

>SPBIB\_v1\_360019|ID:27164075| conserved protein of unknown function [Uncultured spirochete bib]  
MTDFDTLFLKRKSVRAYEDRPIQPRVRAQVLAATMRAPTAGDLMLYSVLEIEEQALKEKL  
AETCDHQQFIKAPLVLVFLADYSRMMAYFEHHGVPEWCARTGRPAIKPRESDLLLACCD  
ALIAAQTAAIAAESLGLGSCYIGDIMENWEIHRELLALPKYTFPITMLCIGYPTQQQKDR  
LQPPRLPEQLIVMKNRYRPAAPEELASMYQGKGYGKFALHGDAENAAQALYDRKFAADFS  
QEMRRSVAAMLKDWE\*

>SPBIB\_v1\_360020|ID:27164076| conserved exported protein of unknown function [Uncultured spirochete bib]  
MKGALIAFGLGTLPTGSLYVEIQFMGLAFAAWRFVLT LGALTITGLIMQRIISTK KKKKA\*

>SPBIB\_v1\_360021|ID:27164077| Sell repeat protein (fragment) [Uncultured spirochete bib]  
MKRLFVFLLVFFIAFAFASAQTSASDIASLRAAAENGDPKAQNSLGIKYFN GDGVAQDLA  
EAARWFEKAADQGNATAQNNLGFLYEEGKGVPKDYAAALGWYQKAADQGYTAAQCNVAWL  
YENGLGVAKDYEKAFHWYEE SAAQGYAYGQYSVGVWFYDKGLGVQQDFGEAVKWYTLAAEQ  
GLPDAQYMLALKYENGEVDADYNEALYWYNESAYGENTDAMLALGFYYEFGFAVDDDPV  
RALAWYMIANDYGSEEAAGYVTDLSKELTEEQIAKARLIADDF\*

>SPBIB\_v1\_360022|ID:27164078| conserved protein of unknown function [Uncultured spirochete bib]  
MSTSEKSDTSASNIPPSTQLARKIIEQLSTVIDPELQSDIMSLQLVENL FVGEDGSVSYT  
FRPTSFACPYGVNLAMEIKKAIASVKGVTRQEIHIEGFVA AAKELEELLN\*

>SPBIB\_v1\_360023|ID:27164079| conserved protein of unknown function [Uncultured spirochete bib]  
MPYRDGTGPMGRGPMTRGRFGYCGAGAGFGAGFGPGYGMGYGRGFGRGMGFGAGFGWR  
AAAYGAVPYAVPAVPTIEAQKSALEYAQKALELRLEAVKAELDALKKSESEAPKA\*

>SPBIB\_v1\_360024|ID:27164080| Transcriptional regulator, PadR-like family [Uncultured spirochete bib]  
MPGGPHGRFGAGRGMGRGPAGPMFLQACLLVLLHKGKSYGYSLAQDLKQFGFDPARIDIS  
IYRALRGLEMQGLVETA WDENSLGPQRRMYEITPQGEAVLSAWMQLNHQRKLEIEALES  
VYDEVTRHP\*

>SPBIB\_v1\_360025|ID:27164081|trpE| Anthranilate synthase component 1 [Uncultured spirochete bib]  
MNGRRGDEIVFSMPGERFTPFTLAKKLGSKAILESASF KQGRERYSLLLVDEAFRVRQER  
DGVSVFVNGISRPWTPKSELAERRKKGKYDILDALS YIASQNAGVAPHLVPASGIGFLGY  
DFAARCDTVKITAKPDAIGVPEAEFIVGHL YLVFDHFTDTIHGIALNYTEHEVDLDARIR

DLKKRLSDLDFSHLAPPEEA VSFNVISDEEADKRVYMDGVEKIRERIIAGDIVQAVLSRR  
LVVSSLDALEGYRRIRSASPSYLFYIDFGTYALVGASPELVRLRNGVASIRPIAGTR  
RRGSTPKDIELEKELLADPKERA EHLMLVDLARNDLGRAC TPGSVRMTRNFEPERFSHV  
IHIVSEVEGIPAKDHTNLDVLRSAFPAGTVSGAPKIKAMEIISDLEPMDRSFYAGAVGYL  
DAAGGFDT CITIRSALVKDGRWYLQSGAGIVYGSKPEREWEETNEKLAALRAALSGGK\*  
>SPBIB\_v1\_360026|ID:27164082|trpGD| Bifunctional protein TrpGD [Includes: Anthranilate synthase component 2 ;  
Anthranilate phosphoribosyltransferase] [Uncultured spirochete bib]  
MTILIDNYDSFTYNLYQLLARLSNEPVIVIRNDEINIEGIEALKPKRLVISPGPGRPENA  
GISVAAIQHFAGKIPILGVCLGHQAICYAFGGNIIQAKHIKHGIAEEISLDGRGLFRTIG  
NKS VFTRYHSLVIDEATLPSCLEITARSADGDIMGVRHTFFNIEGVQFHPESIASEAGEL  
LLKAFLTYRREPFAFKFTLEKLLTRQDL DRETAESFMEELTDGALDTPKTAALLTAF AAK  
GPAAVEIAGCAAVLRRKKT PFTTKVPVTDTCGTGGDEMGT FNISMAALAAAACGLPVAK  
HGNRAVSSKSGSADFYEALGVPVNIPVAAAQTLLEKTNFVFLFAPFYHGAMKHAAPARKA  
LGIKTIMNLVGPLSNPADASYQIIGVYDKALLRPVAAEARLLGVKRVMTMRSRDGMDEIS  
PCALTDIVEISEDGIVKEYVFDPKAEGFGTYDHNELKGGDANDNAKLAL ELADGKGYPAL  
EAATAINAGAALYISGRTKSIVEGAKQAAAALASGAVA AKIEELKMAARIFAADGGAYH  
G\*  
>SPBIB\_v1\_360027|ID:27164083|trpCF| Indole-3-glycerol phosphate synthase/N-(5'-phosphoribosyl)anthranilate  
isomerase [Uncultured spirochete bib]  
MADILEKIVADRRRDLAKFGPSFGSRIPT RRLRPLVPFLAEPAAILEIKRASPSRGDIVQ  
NLDPRKLVAAYAAAGARNISVLTERNYFKGSLEDLVDVAIARPELAYLRKDFLLQEEEEIE  
LSYRAGADAVLLIARILDVDLLRRMAALCRSFGMTPFVEVREYEDYAKLTAAASDGVVLS  
GANARDLATFAIDPLIPAAARSRLPGRAVYESGIDSAGAAA YARRLGFDGILVGEAAIKD  
PGGISAIINGFQSAKEDASGIFWRRIAERRETRVNNLKRSLVKICGLARTEDALLAADLG  
ADLLGFVFAESPRAASKQVVREYQYLYKQQRDLSKDDPKPLL VGVITEIHSTKAETAL  
SLAREGILDAIQWHGESTPAALAALDVVLE GKAGRYAAARIGNAEDLAVIDLLRRSGEPR  
ILADARAENVAGGTGMAIAAELAKFMADR GFLWLAGGLGVGT VGHALKSYAPELIDASSK  
LEVEKGGKDHGLMAAFFKEIDEYAN\*  
>SPBIB\_v1\_360028|ID:27164084|trpB| tryptophan synthase, beta subunit [Uncultured spirochete bib]  
MPTSDKIMARRSDKGYFGPYGGRYVPEVLRSAIEEIEEAF FEEIADPSFNAELERIRSEF  
IGRPTPLLYASNASKLLGGADLYIKMEGLAHTGAHKINNAV GQALLAKRMGKRRIIAETG  
AGQHGVATAAACAKLGI ECVVYMG AIDVDRQQPNVATMELFGAKVVPVYSGSKTLKDAIN  
EAFRDWAESFSNTFYLIGSALGPSYPDMVRV FQSVIGRETKAQLAERGVTPEVLVACVG  
GGSNAIGFFEPFLDDETPRLVGVEAGGIGQ GKGEHASRMTGNGARTGIVHG YKSRFLDD  
DGQVAETHSISAGLDYPGIGPELASLGRSGRIEF RRA TDTEALEALTFLAKTEGVVFALE  
SAHAASAALSLARSLQPEKAVV VNMMSGRGDKDLFITAPLLRPKEWKDFLERELVAMNVSQ  
GAKK\*  
>SPBIB\_v1\_360029|ID:27164085|trpA| Tryptophan synthase alpha chain [Uncultured spirochete bib]  
MSVERIPLMAHLVAGYPDASGCRAAARGLVEGGATYLEVQIPFSDPSADGPTIRDACSSA  
LEKGS SVKESLALVADLHATY PEIPVFVMTYASLVFAPGIVTFV DAAAKAGAAGLIVPDL  
PFDAD EQLAQACVAASEKIPGAICSIPVAAPSMKPIRLAAMIALGRPYIYAALRAGITGA  
ATEINADTKMFLSAVNKGGSKIFGGFGIRSGA QARAVAPYVHAVVAGSVFVETVSAVVLA  
QSPESKTASARSLQIRNEAIRRAVYKKAKEIIAG\*  
>SPBIB\_v1\_360030|ID:27164086| Radical SAM domain protein [Uncultured spirochete bib]  
VESIVKPPEKITLALSHTDSIAFNKLIHVSPQTIDKLIDAPALRKAI AKVFEWSTYRSSL  
SFKEYPRQVQLDKFYITRAFIKAIDAALASAQKSPVFRHSLVNSVLPAMFSAIDKTAERE  
EAFKRRYGF GPPRFLVLSPTKFCNLHCTGCYANSDSASREKLSFETVDRIIREKTEVWGS  
VFTVISGGEPLLYESEGKTILDLARAHQDNYFLMYTNGTTIDKEMARKLA EVGNITPAIS  
VEGYENETDARRGKGIYK KVL SAMENLRAEGV PFGVSLTATKENAHLIPSKELVEYYTRL  
GALYFWIFQLMPIGRASMDLVVTAEQRLDMYNRMFDLIKND RYFIADFWNGGTL SNGCIS  
AGRMRGGGYLYIDWAGHVTPCVFNPYAAGNVNEIYTRGGELSEVLVSPYFESLQEWQKDY  
AMNDEKYEGNWVLP CPMRDHYADMLKILEKTNPEPTDEAAAEALHDPTYHAAMIQYDKEL  
EQTIGPLWKKKYLKH\*  
>SPBIB\_v1\_360031|ID:27164087| putative Transcriptional regulator, TetR family [Uncultured spirochete bib]

MENQVRERIVDQSKELFFNRGVRNVTMDELASACGISKKTLVYVNFPSKEELLHYIMMQLR  
DELVERVRCILSDTSQPVFSRLRDVINA VSLHSMQFAPIFLEDVKRFQPGTWRELQTYKK  
NGIADAIRTLIHDGQAQGYIRKLPENFIIHVCFALIDDILTPETMLELSMPFHDLFEHLM  
SLFFEGFLTEDGKKAIYYIESS\*

>SPBIB\_v1\_360032|ID:27164088| membrane protein of unknown function [Uncultured spirochete bib]

MAKFVYKFRFFIIAAFVLLTLVAALFIPNLRFDGDIQALAPTNVSSVEEYKSVSQTFFGA  
DSLAFSAQSEHLFTPEALSEAAAIGKELQSLPDVSDVSVFTYVEPVNTTDGLSFIPYVD  
PDALPQDQASADALRARLSGIKTVSGKLLSADGDTLLYIIQAAPNVSRIRLIEGIQGIMK  
THPGFSFQMAGTSFIDYQMVSYMKHDVVVLVAFGLVAVLLVLLIGFRSLRGIFLPLFTIG  
CSLIITFGFMGLLHAKLTIVALIIPVMLIAICNNYAIHFLTRFYEDVVFVNGMTDKVEIID  
SSFKSLSKPVWLAFLTTVASFISFVTSPIPRIAEMGLFIAFGITYAFAMTMFFIPALLSV  
LPPPKKHRRYHANEALISNIAQKAGRITKRRLAILAVTLVIAIAGIIFIPRIVVDSELA  
NYFNPKDPVRQGIDFINKKVAGSQIIVSLPLDPRTAEGLA KARQFQDYAESLGSVGSVF  
SIVDSIQTLNRVFDNDPAFDTVPDNDDEAAAQLLLLVETSLSPERLVQLVSEDYQNLCSF  
IQLKAVDSATLQKTADMLRAKAHEIVGPQGVAIAGVSLISNQLNHLVIISMLQSFAIAFV  
LIFAFVAFGFRNIPAGLASAGIMIAIVLVVFGFMGFAKIELSTATALVASITLGVGIDYL  
IHFSARWFSERTSGKSLEEATSRTLSTGRGIINAMAIIFA VIPPFFSQFRPIMYFGIL  
CFMSILLSLIGGLAVMPAMLSA VPERFFKRIRVG\*

>SPBIB\_v1\_360033|ID:27164089| exported protein of unknown function [Uncultured spirochete bib]

METLKISRIHAPRRARAPRGRHVVMVLALLSVGIAGPAWAQASLSGEISAFSGVFFTDSDG  
SFKAGDYFQPSVSLKLAPSYASGPLTMKGELTGSISLADTGYAASMKLGETYATVDVAEG  
LSFTAGSKIISWGTA L VANPEGFINPVDSLSQLVSENRSDWLLPVPLASAKYIKGPFSFE  
AVALPFFRPSTIPAATSRWYPAQLAVLDAKNGSVIPASLPSFPGATFSVSTTPADPALNI  
ETMQGAGRTSLALGAVDVGLSGWYGFTKTPAFDVTTVGMPINVDITASYKRQGA VGMMDM  
SATVLDSSVWLESALYLPEYYIGTENSGLPVALEKNTLKS AFGMDRTFSIGSIGDLYCA  
LEGNLSWILDYDSRLASAIKETGLGATLVTEYRSPSQDFTVRLVVMEPDFLSVDTTKQYL  
VRLSMKAKLADGYSL SAGATLFEGTSGTIGQYANNDFA YVAVTASF\*

>SPBIB\_v1\_360034|ID:27164090| conserved protein of unknown function [Uncultured spirochete bib]

MNNCAQIAGARASRAPGKPAHCGATTIFAAKSLFVLLFGLVLMITAGAQTTSQSGYDIMK  
KANDKPTGNDMTANVLMKITSKTGSVKTREFVMYELKQKDGSSSILIKFLQPADVKGTSF  
LTLESGNGEKSQYIYLSLKKVTRIAASDKNKPFMGSDLYDDFGSRKLD DYSFNLLGEE  
ILEGRACWKIESVSKDTSQSTS KIISLVDKESYIVLVDFYDKTGALYKQMVVQKTDKIS  
GFWTMLELEMKNLSTGSSTSLKFDVVKYNTGLSPSMFSKDGLGK\*

>SPBIB\_v1\_360035|ID:27164091|uppP| Undecaprenyl-diphosphatase [Uncultured spirochete bib]

MLVFQSIILGIVQGLAEFIPISSSAHLVIIPWLFGWNNPTL TSLTFDVALHLGTL LAVLV  
FFASDWARLIGAWFKSIFQFKIGDDPDRRMAWYLVLACIPGGISGVLLESKIGQAFHSDP  
IPKGSMLFMAGAIALLALLWLADKLATHRRAFGKIKARDALYIGLAQAFVIPGVSRSR  
STITAGLAVGLEREAARFSFLLSAPIIAGAGLKS LYDLLKQVKAGAIAGTELAIFPIGF  
VAAAISGFLCIKFLLA YLRKHSTAVFVWYRFALAALVLIVALARG\*

>SPBIB\_v1\_360036|ID:27164092| transposase [Uncultured spirochete bib]

MFVQTLFEKKTGR TLLFY YTARRVKGKIVKTKVKRIGYLDEF LDAYPDPLTHFRQEAKRL  
TQEAQLKTLTVTF SMDEHFSFGAGFAATEDAAVEKADRTFHYGVLPLLQLYRELKIDAF  
RIKAQYTKVDFNHNHLFQMLVFGRILFPESKLATWRDRTRILQHSDFSDDAVYRALPFFA  
QIKDALVQHLHEQVQRQYHRDTLLY YDVTNYYWEVDREDELRRKRGVSKEHRPEPIVQLG  
LCMDNSGLPV TYGLFPGNTNDVATMRPMMQH LAESLGTKHLIYVADKGMMGGMNIAQIIL  
EHNGYVISSSVRKADAELRRYILDHEGYTELAGGSFKYKSRLVPCTLYVDTPDGRKKQIR  
INERQVVFWS EYWK KARHDRDMAIAKAMARAGY GENTVLNNHAGNRFIKKEIFDPDTRK  
EVDHPEFSFALDQELLDSEEELDGY YLIRSNVGVREGDAPFNQPYRWHAKDNL FELNRP  
VVDLDIIDMYRGLWRIEESFKITKSQLKARPAFVHRQDSIEAHFLSCFVALLLLRLEKR  
TGEKIPVATIVESLRKAQLVQLEDETYVNACCDNVIEAIGQALELDLTKKYYTKGELKAL  
RGKTAKSR\*

>SPBIB\_v1\_370001|ID:27164093|fruA| PTS system fructose-specific EIIABC component [Uncultured spirochete bib]

MILQRAFKPASIKIGLESEDKDELLEELVDVLAKTYPKDKKEFPREQVLDALWAREEK MST  
GIYKGVAVPHATVEGIDSLHGVLGISKKGIEYESLDGSPVYLVFMLISSPGEAELHLDAL

RKIALLIQDPVLLDNLKMAARPEQVFALIREFEASAVL\*

>SPBIB\_v1\_370002|ID:27164094| protein of unknown function [Uncultured spirochete bib]  
MDSVDSIDKLEIERQAAAIKEAEDKASRILLDAKNKSESLKDKLAEARMKFESDLAA  
SRDALRTQTQKEIEDYKASLKNIPLNQTALSALEDLLKQEA\*

>SPBIB\_v1\_370003|ID:27164095| protein of unknown function [Uncultured spirochete bib]  
MADSFEIAYLYARVCGAFSKMQLGEAGRELMRNPGGIPALWKL YFNEEPPTIPESKLIFE  
AERKIIQRSISSFLRLAKPLSDSDAFIHALISKFEITAIKSMLFRLRSGEPRPEEISYSS  
PVIEQALSAPWRLADMFDTPYAWLDNSWLDNIALAENKLDQRYYLDLWATASRIPKPKL  
GAILDLVRWEIVYQNVIWALRIRRYNMSRQDATSMLVDIKGIDTTSALQTFDFDIDRL  
DSFDSWPLKLLSNQTS AHLDVPVLEIRAQEELFTMVRRALHLHPFSYTPVYCYFKLLEY  
ETSLLAVLESARLGVTAEQKSKYLWIPGEETA\*

>SPBIB\_v1\_370004|ID:27164096| V-type ATPase 116 kDa subunit [Uncultured spirochete bib]  
MSSVRMRRVELLLKSDIDAVLKYLGSSQCFQIY PDEIERIAHEKLAGIVESDEEKALA  
SRLDNAKSKLDFIGTFFGLPVPQNIEDAHL PDEEMLSKLDILYERCADLKTRIAEQEAK  
VDQLAESLHEAKAFSGLSQPFDELEKFSYVSIQIGHIAKEKLEDALEKALGARAVIPLDN  
EGTILAAASRKGRFALETLSKAGFEKKSPPEASGVPAEAMSALEHAYQAEKLRLENLL  
QEKKSLSSEQYGS LWQVMVSSVRLKQALILVETKLEQTEWYRLSGWVPVDRIDRMAKDII  
GMLGERV SIRIFNPDETKSSGEKDTSEEVVLLKHNVFVSAFQGIVLSYGTPLYGDIDPT  
PLVAFFFTLLFAIMFGDLGQGLVIAGLGLAMLKMKKGF LASYKRYALAFIAAGVGSMMVMG  
LLVGSFFADDKVLVPLERILTRLILGQPKDRFLQIMPQGNINSMFYFFGFTVIGIGVIINS  
TGLVINMINLMRRKEYGEALFTKTGLAGSLAFWWAIGMGVRVILGAKLGWIDIVGLGIPL  
LAMFFAEPLKALVDKAQGGKPEQVSLMDSL VGGAVELIETLSYYASNTMSFLRVGAFALA  
HAVLSFVVFTMAELVRGKSSSGMAFQLIVYIIGNVIII GLEGLIVTIQVIRLQYYEFFSK  
FFARTGKTFKPVSFSE\*

>SPBIB\_v1\_370005|ID:27164097| conserved membrane protein of unknown function [Uncultured spirochete bib]  
MKKKLLAGVMTFASSIAFAQTQTA AVPASAQTAKYIGAAIAVSTAVLAGGFAVAKIGAA  
AMGAMA EKPELSGKALPYVGLAEGICLWGFLVALLIILL\*

>SPBIB\_v1\_370006|ID:27164098| Vacuolar H<sup>+</sup>-transporting two-sector ATPase F subunit [Uncultured spirochete bib]  
VAEIFVLAEEEEILAFGMIGVKGKAVTSRDDAIA TFRSIVQNKTCTIDRGVVDLSDCKML  
ILSEDISDMIGKELADWQLSGEFPLIVEIPPLSGTSAQHTRLVDAVRQAIGIKIQ\*

>SPBIB\_v1\_370007|ID:27164099| putative ATP synthase (E/31 kDa) subunit [Uncultured spirochete bib]  
MEEIRGTEALEREILDDARKRAERIVRKA EDEAKALQAQTEQKIKAAIDALTQEYQTKQQ  
TAEKEVRSRLPLEKMRLEIQYRDEVL RNAVAEVLAKIDPRLFGAWCLRGLKRQVELIRGS  
KATISVKGLDSAYIEIKTLFQDAGSVSIK ESEAMKARGIIVEPDDNSYRISITENELVS  
WLLDEERGELASALFGQTDSSATNTAGSPTGAGTSALKGARS\*

>SPBIB\_v1\_370008|ID:27164100|atpA| V-type ATP synthase alpha chain 2 [Uncultured spirochete bib]  
MSAGYITRISGPVIAAQQGMDDAGLYDVVKV GKAGLIGEIIKLGDVATI QIYEDNTLMRV  
GEPVECMHRPLSVALGPGLIGSIYDGIQRPLPVLKNVSGAFLAPGLAGEPLDTSKKWHFV  
PLLKAGDPIAPGTAFGIIQETASIQHRLVFDASVPASTADWIAPEGDYTCTATLVKSREG  
KEYTAVSWWPVRAARKFTEKQITHEPLVTGLRVIDVLFPIAKGGSAAIPGGFGTGKTMTQ  
HAIKWCDADIIVYIGCGERGNEMTEVLTEFPSLIDPRTGRSLMERTILIANSTSNMPVAA  
REVSITYGTITAEYYRDMGYQVAVMADSTSRWAEALRELSGRLEEMPAEEGFPAYLPTL  
AEFYERGGMVKTLEGKKGSVTIIGAVSPPGGDFSEPVTQHTKRFIRCFWALDRDLANARH  
YPAISWNSYSEYTEDLIQYWDSIDPAWDALRTKTMDILKKERKLSEIVRLVGPDALPDE  
QRLILLTADMINKNGFLQQSSFDTVDMYCAPPKQTFL LTCILTFHELAENA IKN GAPLLKI  
SALPIKEKIIRLKTLENK VQEGQAVIQEIQQAFTQLGVGAQQGLSI\*

>SPBIB\_v1\_370009|ID:27164101|atpB| V-type ATP synthase beta chain 2 [Uncultured spirochete bib]  
MRGLEYHGILRADGPVIAAHRENVGFSELARVRDRTGELRLGRIVDISEQAIAVQLFSE  
NTGISIDESWIEYLEKPLTFRVGDGIVGRIFNGLGDPIDGYPPITSSDLRDINGRPINPS  
ARVYPRDFIQTGISAIDGMNTLIRGQKLPIFSGNGLPHNRLAAQIVRQARVLSGESQFAI  
VFAGMGIKYDVARFFIDSFEEKSVLSRVVMFLSLADSPSIELVTPRTAL TAAEYLAYEK  
NMHVLVVMTDMTNYCEALREVSAARNEVPSRKGYPGYLYSDLASLYERAGKIENCEGSIT  
QLPILSMPNDDISHPIPDLTGYITEGQIVLERDLSQRGIYPPIAGLPSLSRLMKDGIGEG  
MTREDHRDLAAQLFSAYAYVRSVRDLAAIIGEEELSDRDKIYLNFGDRFEREFLAQGEFE



NRSIEQTLDLGWKMLSILPEAELVRIPPKLIEKYLPRGTGNGDPAKE\*

>SPBIB\_v1\_370010|ID:27164102|atpD| V-type ATP synthase subunit D 2 [Uncultured spirochete bib]  
MAEPFPPTKTNLIKEKRSLLQALQGYDLLEKKREILVIELMNRMDALELLEQEIAKMTE  
KAYATLRQMLLSVGRERALSISSLPVRDITLTASHVNVSGMTLPTLDVHASAPVLHYSFM  
NSFAVCDETVEFTELLQKLSTAAGMRSIVWRLAREVRKTRRVNALDKMVIPRSREIVK  
FIDASLDERERESLFAVKMLKQRLSEQDQT\*

>SPBIB\_v1\_370011|ID:27164103| UspA domain-containing protein [Uncultured spirochete bib]  
MKNMLETVLVAINGSDASISAFKYALAIKKSLSGRIIACYVVDATIRQLALSRIKVPPEE  
SEEYERNLENSGRRYLNFCIELARQKQLSIETAIRKGSVSGEIVKASMELGADAILGGN  
PADTLYRDAIADAYREILKNARCPVLFVKPPIGDELKAL\*

>SPBIB\_v1\_370012|ID:27164104| protein of unknown function [Uncultured spirochete bib]  
MLLCKWHLILSLAPYFWYFEMMRSKYSLYPLAAGIVIIVLGLSSCVSPLSWSSYSENLN  
LLDAAAWKSDMSTLESELLGHPKLKSDTALQAQLSTAISQAMSDIDGAPDGESRRDAAIA  
GISKACAIVGDGHTRINASPTARYPVALRFFPVSQSMASTEYELRVFAASDENASLLGGK  
IARIGSKTVEEVLIDILAPALSIESALGKPGLEELKNAAIRAESLNAFMNPILMRGLGLAD  
EQGLHLSFDTEASPTGCPAVYTVLESSDAFTWNYAIDPNAPPALSRQKPNENIWIYTIPEA  
HPETLYLSFQSCESDAGPIFDEVIQLLKSSPAPNRLIIDMRTNSGGNSMPGTRFAQQLAD  
TEVAKRKGGVVILVGPYTFSSALMNAADILKACGARGDPGSGNAVLAGEPLIEPMDHYGE  
VVRFLPNSGLVIGRSSRLWEYSKTSGITPDNGFLGPTPDNLRAPTFEYRRGQDPVLEM  
VL\*

>SPBIB\_v1\_370013|ID:27164105| putative signal transduction protein with CBS domains [Uncultured spirochete bib]  
MKKTAGDILEVKGHEVA AVSPDDTVLHALEVMAEKNIGAVLVMDEQGMVLGVFSEKDLAR  
KLIKSHSCENEK VGNIMTKKVIFVQLDTSIEQCMNMMTQNRIRHLPVLDNRRVVGIIISI  
GDVVKALIEVKDRIISEQAFELGQHERASTPGAV\*

>SPBIB\_v1\_370014|ID:27164106| AMP-dependent synthetase and ligase [Uncultured spirochete bib]  
MITLKKFTLAEVPELSAKQFASRPALSMVGGSVFTYQDFERESIAESLLHAGVKKGDR  
VALLAENSPHWVMTYFGIARAGGIVVPIITDFIPAQICNIIDHSGARIVFVSEKLRKLS  
DLPKDIEVRNVKTGRPFEEPGASPESASARTLFPDVEADDLAMIVYTS GTTGLSKGVMLT  
HRNILSNATAACKSIIVLRRTDRLLSILPLAHAYEFTIGTVIALLSGSHIHYLDRPPAASV  
LIPALQAVRPTIMLSVPLVIEKIYRSSIKPTLDGMKLYKSPILRPLIIRFAGMKLMKTFG  
GKLRFFGVGGAPLAADVEEFLKKAHFPYAIGYGLTETAPLLAGCGPRTTHLRSTGPALKG  
VQLRIADPRPDTGEGEIQAKGNIFKGYWKDEARTREVFTDDGWFR TGDLGYIDEKGRLF  
IRGRSKTMILSASGENIYPEEIESIINQSPEVAESL VVEDEGGLTALVYLKSEVLENLEA  
RLQDGLDAAGALSARVSQAISAEKSVAGTVSHAVVDVEKAVEHLENIRKEANSKLA AF  
SRIQNVKIHREPFECTPTQKIKRFLYGKKKEGSREQGAAGDNHASSGIHQAGKS\*

>SPBIB\_v1\_370015|ID:27164107| Response regulator receiver modulated diguanylate cyclase [Uncultured spirochete bib]

MSSIRILLVEDSITQAMRLRYVLEAEGFDVDVAANGADALTFLENNAPDLIISDVMMMPKM  
NGYELCRKIRENPRYKETPIMLVTTLS DPTDVIRALEAGADNFTTKPYNEQALISRIRYI  
LANAEIRKQRGSEIGIEVFFSGKKYFINSTRIQMIEFLLSTYESAIQKNQELFISNNKLLK  
EALDNIITLQRNYRQLLETSQDAILVYDKDKMIRYANPAHALFSKEQKGLIGARLPIEE  
DISTQKEIEIKDPYGNITFLDARSVSTDWDNETMTLSVLRDITESTQLRKELEQISLTD  
LTGLYNRRGFKILSERMIKLARLQANMFILFGDMDGLKTINDTLGHLEGDNAIRTMASI  
FKSAFRESDLVARMGGDEFVIGLINENFVFNRLVERMNELIGSFNAKGEAKFKLAVSIG  
IERIAYDSQVPIEEMLSVADTKMYKEKEGKR\*

>SPBIB\_v1\_370016|ID:27164108|cheB| Chemotaxis response regulator protein-glutamate methyltransferase 2 [Uncultured spirochete bib]

MIKVLIVDDSIIVSRQLLKYIFYLSGDIDVVAEAKDGAEAIRIIDDRKAPRPDIITMDIEM  
PGIDGYETTKHILERHPVPIVVISNAMQYYSAEKAFRAMQAGAIAAVGKPPGLGSPDFYQ  
KARELIDLKIRISGIKVRPRLSTAELEGHQKDSVHKSQVVEQKPLSRDQLQTWAQQNSPG  
IVAIGASTGGPPAIQAILARLPADFPPIVIVQHIASGLAKNFAEWLDKTCPLHCKLSEE  
SERMRPNTVYIAPNDIHLKVAYPDTLQFQMPDANELIVPAAEVLVHFSVAEYVGSRAIGIL  
LTGMGRDGSRGLELKKAGALTIAQDRESSVYVYGMPEAEKLGAAACCYLPPEIAKILLE  
IYNARKEKEQTR\*

>SPBIB\_v1\_370017|ID:27164109| putative Chemotaxis protein [Uncultured spirochete bib]  
MLNQEEFLKQLREAF AIESKEHIQTIASALLALEQTHGEPDQELIETTYRAAHS LKGAAR  
AVDLKDIEYICHSMESV FQALKRDEIRPESQLIDTLHEALHLIELELSNSAVPATEIGAI  
CERLDQQAKKGNAILSTSLAPPSPTQASVAPPSVPPSASTYKPETRPAIPSTIRVQAER  
LDTLLRESENLIAIKQLHAQIQ AQLKSVLSLSEASSGNQARKDSIHALS AISNRLASES  
VHISTIIDLIEEAQSVLMLPCS VLFDSFPLAA YDIAKSLGKEVSLDISGQTIELEKRIL  
EKLKDPLMHILRNAIDHGI EPPGEREAHGKPRRGHISISVSHLDARHIEIIISDDGQGID  
PESIRSTAVARRMFSESEA QKKTAGELYGLLFESGFSTSQIITDLSGRGLGLAIVKNAMD  
ELEGSVRIKSEPRGRTSFHLVIPYTKASF KGNFVRVSEQTFVIPSSALEQGLRISQDAIT  
AAGSANVIEYQDETIGIVHLGDILGISRPMETETPDHVIAVVCRSREKACAFIVDEIMGE  
QDVLIKPLGSL LQKVRGIYGATTGANDEVIPILNMKEILELAFSSLFGPPGRVQPEKASV  
ASASTEKT NAPKRILVVEDSITSRTLITSILSAAGFQVQAATDGI EGYTLLKSEPFDLVV  
SDIEMPRLDGFG LTERIRNDATLANIPVILVTALESKEHKEKGIAVGANAYITKSNFAQS  
NLETVRRFI\*

>SPBIB\_v1\_370018|ID:27164110| conserved exported protein of unknown function [Uncultured spirochete bib]  
MLKNMKMRAKLILGFGLVIIVMISLAWYSFTEQA AINRHLDDIINTHFATLTLVDEINIA  
RVQLSQNVSD FVAASTASEIEKLYQSVQNDIQTIQTNITKLQTINTETETL KPLADLNAS  
FARWLIYNEEVGLKNAKKQKELVQSFNTKGKEAFALVAEKVANIAESTKKRAADAYQNA  
LAMQKSATTITILN ILGIAFAVLF AFVIGENIVRPIKQLVANLEEVANGNLQKHGIDDK  
RKDEIGMLIKAFESFLDRFREQISEMNKMVLHLAASANEMSATSAQLGSSASETAASVME  
TATTTEIRQVAQTTKDLAGT VTASSDQSYALS KESMTAILQMGENVQKIKNQMDNISQS  
LLNLSEQSQMIAEITAAVDEIAEQSNLLAVNAAIEAAKAGEQGGKGFVVAQEVKSLADQS  
KQSTRQVRKILADIQKATSGALMAVEQGNKEMQQGA EKMNQVDAAMRAIADSLSKSVQLV  
QQIAYA VEQQFTGIDQINSAMNNVKTASAQNADAARNLEQVAASISDSGNK LKSFIEVYK  
L\*

>SPBIB\_v1\_370019|ID:27164111| protein of unknown function [Uncultured spirochete bib]  
MQNVSKNSLLAANNSYPSASPVPESPEHSAHTTRTAEDILLARAKELAKGQRHTTKKTDI  
RCIEFALSGMSFAFEMHSIREIMRNSMPITPLPFLPKSFLGLINVRGEVVPVIDLAHYLG  
LSRPKEAKEV LKSLIILQKNEVA VAFPCERIVRIREFSKNELQPTIAAQSQVIASLAKGC  
GRGGITVLDADAFMLQLQKSLNPE\*

>SPBIB\_v1\_370020|ID:27164112| putative MCP methyltransferase, CheR-type [Uncultured spirochete bib]  
MNKEQRTLHAAFDEHALKTLLEQNRNQIQR SLEANFGLKPGA VHYYS LKKA AHGLQEAEK  
KPLPEIIRLLCEIPMREDV VRIIVPHITVYETYFFRHPEHFAWLRDSFLPGL EIRKRAKG  
TLNITCWSAGCSTGEEA YSLAMTLFDYFKGQQGWELKVVATDINHESLDIARHG CYGEWS  
FRDLPRETKERFFYECNDALELVPGLPRLKRYHIDTRIQQMVTFAELNLSAPQWDVSELS  
ARTFDLIVCRNVLIYLHQDAAKALISRFAEYLEPNGALIVGPSEPWFLNDS PFVAQQIRN  
GTIFIKKENS AQSEQHTKQLPAQRLENPNSIKTVAESLTPQKTAPAESLSP PQPTLKTTF  
PVTMHEAPLRAKEEREEVIANARHLADSGEAA RAIELLS ELIQKETTDP ELYLRLGLAYI  
HTRDLSSAESDLK KSLFLEPDNVVAYIALASIAKERGNESEMKKHYSNALHFLSKIEETA  
VVPGSNGIPAKAMRDMISSLMAR\*

>SPBIB\_v1\_370021|ID:27164113| protein of unknown function [Uncultured spirochete bib]  
MPDSGTITPNISKQDL PANAAALNVCIFRVGQRLYCLPAASVEYVYPYCEITVPHEAESI  
EGVINLRGSIIPVIDMGMKCEQRPLERDPAHKLLVARV GSHRIALHVEDVMDVIDVEPSG  
WEETDAILPGIQVLTGIIKYQDGLALLYDPEHFFDTELAEREHAQKK\*

>SPBIB\_v1\_370022|ID:27164114| conserved protein of unknown function [Uncultured spirochete bib]  
MDPEMRKKIDETFAKVRE PQSDAPIVDLGLVEKV TYSEKEKTLLVRLAIGT PRWQCPACS  
AINGVVKEGIVRRAKEAFEA AFPELKILVE\*

>SPBIB\_v1\_370023|ID:27164115| conserved protein of unknown function [Uncultured spirochete bib]  
MNPFLFTGILILGVGATVNYFLGVKKNRWLGKRLSVQSEEV LAPTETNYVNI GGAI GYNF  
RYQLKGLWNEAKGTFTFVPRHSLLYMPVSFLIRGGDHYYLNIYTDKRLPGE GHII LASHL  
RKAKIDGLEAMSRKDIELGGRKFVLLWRESRILDKLEKTALGFPEPQTLVHFCCFADNKT  
LFLHLSPKNGVIQNNLSYFLKNAQVFLEK\*

>SPBIB\_v1\_370024|ID:27164116| Arsenite-transporting ATPase [Uncultured spirochete bib]  
MSPHISHKTAFFLKGKGGV GKTTLSASFALALARAGYKVLAASLDPAHNLGDALGLK LKSE

PQHVEPNLDALEIDLDAWVNTYLEESRSQLKSTYSYNVTLNLDSEFFKILKYSPGTEEYAM  
LWAIEDIHCNLAPLYDVVVLDTPTALSLRFLSLPTISGLWVKELAKLREILSKRNTIV  
RLNPGSPVKESCLDKDDDKVYGKLSIRQRLDALEHLFQKESFLNVIVNPDDL SVSEALR  
IKDELDRLEIPISTICLNKRGMVNGQWHIHESLASIPLFSFDFESNGIRTRDQLTELGIQ  
PLIDIFLKKGSLA\*

>SPBIB\_v1\_370025|ID:27164117| protein of unknown function [Uncultured spirochete bib]  
MTEKMKLLHLVRRGAKTFIQVQREKATGMLDFELKELENIFALLLLGGFAGIPSPAPIA  
IELLPYLEREIVVLLARSDLSTDPICALMGMLEID\*

>SPBIB\_v1\_370026|ID:27164118| Carbon starvation protein CstA [Uncultured spirochete bib]  
MSTLIALLALVIYFGFYFLYGRITRDKVLKSQEAPQAPSKRLSDGVDYVPTSKYVFLFGHH  
FASIAGAGPITGPAMAVAWGWLPGLLWIWLGNIFIGSIHDYLSLTASVRYDGRSMQFVAQ  
DLIGKKAGKAFSFWILFLCILVVAAFGDIVAGQFAADGRVFSAFFFFCVAAIITGYFMYH  
TKLGIGGGSIIIGVLIILAFWLGEILPINASKDTWFIVIFVYIVIASALPVNFLQPRDY  
LNSFLLYFGLLVGGLAAIIAVKGFDSLPAATTSFSAVVIGGKPTPFWPAVPLVIACGALSG  
FHALVASGTSSKQLRDEKDALFVGYGAMLTGFLSTIVVISIAAFGIAAMGEGNVLKTA  
LNRFVLSYGTMVSTALPFLTPSFMKLFVAVVSSFALTTLDTTNRLGRYLQEMVLP  
KSPGVYNTFNKQVAVSLIAFFGVGLAWTGNVTWPAFSGANQLIASIVMLTVAVVWVK  
KLNPAAYTLVVLIPAIFLWVTVTAGIHWYEVIVPSFFATVANAAAQAKNYTTGVVVGAIN  
IFMLVLFNFMIVAFFRNWNTKQAS\*

>SPBIB\_v1\_370027|ID:27164119| protein of unknown function [Uncultured spirochete bib]  
MKNVHGPVLDLGGGYFRIGSSQLVGSLSQNIYLLIDGDEAVLFGPGSAIDLAEVNRNIESV  
APKDPVRTVIVHEQDPSSSSALSLEKEGLRFDVVTWRTWNSLRFYGLSSEPYIIDEHS  
WVLRASGRTLQFLPTPYLYQPGAFATYDRATRTLLSGALFSSYSSEFSLYGEGADYLEQ  
LKNFHRATMPSKDFLAPVVHSLASWDIGRILPAYGPIWRKNIRGILNQLADLECGELARS  
KETQALQQQIVKENGSGEEVAHLKAELEKLRKVNEELNHSISVSRDRALRDPVTGLYSEF  
FYKSFIEEEVAVRISDMGPQDNVLGVFGIDENIAQIEYKYGSREVEALLHGVAIITENL  
PQTSMAFRLHGATIAVWMPAVLFDDAVALFDKIRYQVENS KAFVEPVTVSAGVATLSEAA  
NLQPDLERLGADLTDLGI RRLARRRGGNMVYFASAEENESESKARILIVDDDEVNVDV  
LRTFLSNEGFSVLSASDGQEALSILGKEIVDVVITELMVPKIDAYLLKESMLSKSATKDI  
PVILISHLKTESTIRRAYRLGIVFYLQKPIILEELLGIVLNLTEAGSRA\*

>SPBIB\_v1\_370028|ID:27164120| Glycosyl transferase [Uncultured spirochete bib]  
MTIPSEYLLGA AVLFLWLT VVFLR TLLNKARLAIKQETLKSQRQLPQIFAPVYEQSKH  
MMRMLLDHILYLTQNVNISAQQKQRLFNAETVSYFERTQMRRLASHNRFMRMNAARLLAS  
FGTDNARKAIEKALLREKHFPTRLYLANALSDIKDARSLHALIQSLKGAHYWYRNKVNML  
IASYGDALKDFMRGYYWSADIEIRELLVDLAGVIPCVELKEYLADILHRGFGEIGKIEKQ  
TANLPSKCCYYCVHGQIEAGKDHRCQPYRGKVANNFHCWRYRTLVTSLSPAVSYHRLMVR  
AAETLERFYPDELDC EYYLEHVDKDIQSI AVRSLGHSARERNVRTLLFYLERDETAQAAR  
AGLRLLLNSHPQYMPQMIEAFRNSDGVLHNRLAEVLSSRIEYVLT KLLGYEHDF AAGVVN  
ELITMGRVSELIEFLKRNRNKELEAKLVDIIRSRLSDSEVLARECGLFLPDHLLQELGIS  
RISPLAKKREEKLD RKMVRRLYVMLSFAV VFFPLL YVLKYDRLGAMPFVQHLKYFVLNF  
NINFAYYAMAVNAIYLGLLFLSKLNIRRASRLWELKGMTMLFKPRMLPSVSIAPAYNEE  
MTIIESANSLNLKYPDYELVVNDGSKDNTLRTLIEHFDLKKTD FSYQERLKHYPIRGI  
YTNPAIPRLIVVDKENGKADTLNAGINVASKEYFCGIDADSLES DALLKIASLTLDYG  
VETPALGGNVFPINGCKVDK GKIEKIGVPRNWLARLQMV EYLRAFMCGR LGWDYLN SLLI  
ISGAFGLFRKERVVAAGGYLTSSGQYQKDTVGEDMELVVRISRLMREK KLYRISYAFNA  
NCWTEVPEEMSS LKKQRNRWQRGLIDIMNFHRKLIFNPSYGV MGLVAMPY YLIFEMIGPL  
FEIQGYLMVAIAAIFGMLS VRLALLFFASILMGIFISSVRIA EHLNVYFSYRDTLKL  
LKTAILENFGPRQLFSFWRVLGFLNAMRKPQGWDFARKGFAGSGQAGGKAA\*

>SPBIB\_v1\_370029|ID:27164121| conserved exported protein of unknown function [Uncultured spirochete bib]  
MKVKTKKEYFKTSLWIIIGILVFALFTALIAMPFVLWIAKPYRQLDIWVVDKTVPYSDFRE  
HAGLFWLLNNEKIAKPATRVLYDKRSDYYGFYPTGKNEWRS LKLPQTGKKPDLIYIADTY  
GVYRDDYMQSKMTAALPSLIYGGLNSEDYRVIQASLGGGNTIIAEFN TAASPTNSRDRAL  
FERLIGLAWRGWIGNYYESLAQGGGVDPDWVANWETAKKEKWNYSGRGIVLLDENG NVEV  
LTEAEDLGPKGMKVQFDGLLQKLGKIKPVSYRYWFEWVAADPLVEQVAHYSLDLTAAGK

KKLEALGLPQKFPVVLKFENSQYTSWYFAGDFADLQFSGTPYRMEGIRAIKRILADDTVD  
NNSYFFWKVYAPLMHYILASA EKHRAEVRSEAALAGPTALRVNVRAVKDGIQLRTKNHEW  
ETLFLRGVNMGLAEPGKYFTEFPYD TDYVRWFNYIGALGANTIRVYTLLPPEFYRAFRI  
YNEAHPDAPLLLLQEIWPEEHPPGNDYLQPAYQEAFLKEIDYGIDAIYGRANIPERKGRA  
WGIYTTD VSPWLIGWLVGRELESAEVLQTDANHKGATYKGTYSAGAKASPTEVWLAESL  
DAVAATEAERYGQLHPVGIVSWPTLDPIEHDTEWDPNTGKKNRWNDRASIAVEHLDITDK  
MTAGLFGAYHIYPNYPDFIVNEPAYNNYKDEYGVLR YGGYLQEFIKTHSRYP AIVAEFGI  
ANGAGVAHLS PDGLNHGGIDETTAGRDILRMQAAIQKEGYAGAIIFEFMDEWAKKTWITE  
PFKIPFDRRIFWHDVVDPEQNYGLIANESIPPEKPEQTISGSNALSSLEVAHDASYLYLT  
IHLASGKKPQDCEVLLGIDTYNRTLQMSWPRSLGRTASGMEFLDIRNEEARILVNPSY  
NIASARYATSLRQDGVFENMNMLVNGKVVTKDGREIPEKRFDISLMRQGPFDSEGNLWNV  
EGNTINVRIPWGRNLVTD PSSLRVLNDTRTNLGD PGIDTLKASITDGFVFDGLVLDKHS  
SVIGRLNANVTSPYIWN GWEETPPYRERPKSYSIVQDAWKVASEKDKPVRAD FVGAHSK  
\*

>SPBIB\_v1\_370030|ID:27164122| Peptidase M29 aminopeptidase II [Uncultured spirochete bib]  
MQDQRLKLAHLLVNYSTKVQPGDKVLIENVNPEPDFVRLLEEVHAAGGLAFVSYRDKR  
LERTLFMNAPEEQFALQAEFERARMDKMDVYIGFTNMQNSFAWQDLPQDKIELYNRHIWK  
KVHIERRISNTRWVVLRYPSAAMAQNA GMSEDA FEQFYFDVCTMDYAKMSKAMDPLVALL  
ERSDRVRVKGPGTDLEFSIKGMPAIKCDGTMNIPDGEVYTAPIRDSVNGVLSYNT PSEKD  
GFKFENIVFEFKNGKIVRAEANDSERINKILDIDEGARYLGEFSFGVNPYITKPMLETLF  
DEKIAGSLHITPGNSYDDCFNGNRSALHWDIVLMQDAASGGGEVWIDGVLVRKDGLFVQP  
ELVALNPEALRT\*

>SPBIB\_v1\_370031|ID:27164123| protein of unknown function [Uncultured spirochete bib]  
MLRLWAYLMWHNYLKPYRIHWPKGRRPATHAEASGIDATALENVYRSFFEERAF LTRSPL  
SPTMARSWKKEWRTPGKEKAEYLPKLALG\*

>SPBIB\_v1\_380001|ID:27164124| conserved protein of unknown function [Uncultured spirochete bib]  
MADKTSRLAGNAAGK WYVDSSCIGCGLCSSTAPDIFTLGDEGQALVIRQPQTASEIELAT  
QALNDCPVQSIGNDGE\*

>SPBIB\_v1\_380002|ID:27164125| Spore protein SP21 family protein [Uncultured spirochete bib]  
MNSLVLYDNNPFDLIEKFFDDDLAPRFRTPAIDVYEEGDKYMLEAELPGLSDKDIKLEV  
RNGQLTLSTAKSEKTEEKSKKGRWIRKERREFRFARSFTLPEDVDASAIEAHFKNGVLQV  
IMPCKPEAAPKAIEVKID\*

>SPBIB\_v1\_380003|ID:27164126| Extracellular solute-binding protein family 1 [Uncultured spirochete bib]  
MKRVIIVAFVLLLVGVTMVFGQKVGAYTTLEEPLAKELFDEFQKETGIVVNWQR LSGGEV  
ESRLEAEKSNPQASIWVGGVGLNHISAKL KGLTPYKSKMLENTPLQFRDPENYVWGLYI  
GPLCFVTNKNVAKA QGLVPPTSWADLLKPEYK GKIRMPNPTTS GTAYNTLTTLRYVFGGD  
ENKVF DYLSKLDKNIDQYTKSGSAPGKSVAIGEIPAIAGYAHDNVKLRVEGADITITFPS  
EGTGFEIASMSLVKGGPDPVNAK KLYDWVLSPKAQEI IAKWYVIPLSKLAKKNPNAF SIS  
EIKTVNQDVIWDAANKERLLERWVKEIGSKR\*

>SPBIB\_v1\_380004|ID:27164127| ABC-type Fe<sup>3+</sup> transport system, permease component [Uncultured spirochete bib]  
VFTKKKLIVFAIVCAIFAAGEYWIFSTIQASFEKNAAKEITALARAIAASAPENNESLAS  
WTEQLPSTYHGYRFFAFKGVPGEEGSEPA GGDSALSELWKLPSNADIAAKAAESVSYLEV  
FRWPSRVTFAGVPYTLIAPVPDAEGSSARAALLIAADASGYVAFGRLVQTLAVVTFVLF  
ALGFGIATFSRDPISGYAILVLA AVVAVFVAYPLFEAVRLTLIKQGRFSFDVWKTILSNR  
QYLQALWGSIQLGIVTATISTFIGFMYAFAVARTSMKGK KLV TALATMPVISPPFSLTLS  
IILLFGKNGIITKQWGLQNFNIYGLGGLALVQTISMFP IAF LTMQGV LQAIDSTLEDAS  
LDLNASRWHTF SHVTLPLAAPGLLSSWLLVFTNSLAD FANPLLLSGSYRVL SVESYIEVT  
GMSRLNNGAALSLLLLPTLTAFLVQRRWVSRKSFVVVTGK PSTRLSDLAAPGARRALTG  
FVVVVVSGLIVALYLTIVAGCFVKNWGIDYTF TLVNIHEALTRGKQALISTITLAGIATPI  
AGVLSMVA AVILVRKKFPGKRILESLIMTPFAIPGTLV GISFILAFNKPPLL LVGTGAIL  
VINYVIRELPV GLEGGVAALRQIDPSIEEAAADL GADQATIFRTIILPLIRPAFISSMSY  
TFVRSMTAVSAIIFLISARWYHITI QIYNFSENLR FGLASVLATTLIIIVLAVFGLMRL  
IRQSEFLEKTVTAQ\*

>SPBIB\_v1\_380005|ID:27164128|fbpC| Fe(3+) ions import ATP-binding protein FbpC [Uncultured spirochete bib]

MATKSVPVTLSHVTKIFKDPKSKAEVHAVEDANFDVRSSELVTLGSPSGCGKTTTLRMIG  
GFELPTKGKILIGD TDV TYLPPNGRQTATVFQSYGLFPHMDVFDNVAYGLKIRKLSHTEI  
ENRVRTVLELVGLAELAHRAPGRSLGGQQQRVALARSLVVEPQVLLLDEPLSNLDALLRE  
QMRVEIRRIQKSLGITAIYVTHDRIEAMSLSDRVIVMRNGVIQQIGTPGDIYERPVSMFV  
AGFVGKVAFFPAQLEGIEAGGRAICTVGGKRV RAGSAAEGLGTGSPA VIMARPESLRLVE  
KEDAISSTVTARVYLGSSVEIYVKTETGEILVQIDDPGKAIPSEGEAVWIGLNEALVR  
VLP AE\*

>SPBIB\_v1\_380006|ID:27164129| taurine transporter subunit ; ATP-binding component of ABC superfamily (modular protein) [Uncultured spirochete bib]

MVSLEDISFFYTVHGIPKPVFEHFSAQFEHGRITAVIGPSGCGKTTLLRLIAGLNT PQSG  
RIVVEGRAEEKLQSRKVPAAGPRIAFIFQDFGLLPWLTVERNAGLGLEALGIPPAERHAR  
VRGILEELGLSEWRKAYPVRLSGGMQQRVAVARALAINADLILMDEPFSSLDALTRESVQ  
DMLRSIQRAHNTTIIIVTHSIEEA VYLADSVVVLVDGSM PAN YCQVVDNPHVWEQESAARA  
PHVMQAPVPQQPPASPEASLNPRETSGYLAAV GALRHTFNQAVAQKAEAEEMAAAFAVP  
AAAVTPLAAAVPAVPAVSAAPDVPAAALPAHKKLAPSVTRFLARSAQIFAAAVFLVAA  
WWAAAALVQRPFPLPSPLAFAQFAVNLQKGVFQIHVLASARRVFFALLAAGPLAWVLGGL  
AGRIPFFDNIFAPLVYFLHPLPKVAFPLMLFLGLGDASKIALMGLVIFGQLFVTGRDA  
AKGIAPALLDSVRTLGFSRLSIIRLAIVPSTTPSLMSALRVSLGTAIAVFLSETFASID  
GLGWYIMDAWSRIDY PDMYAAILALSLFGLFVYFAIDAIEAVLLRWRERT\*

>SPBIB\_v1\_380007|ID:27164130| ABC-type nitrate/sulfonate/bicarbonate transport system, periplasmic component [Uncultured spirochete bib]

MKISAILIFALAVLIQPF TQASAAQQVQAAPLSIGIFADADSLPLIVADNEGLFQKEGISV  
KLVRFSSAIERDSALQAGKIDGAVTDVLA VVLANQGGFPLKITS LTNGRYGVAVSPKSN I  
QSMKELEGKNIAVSLNTIIHYFADWSAREAGLKADSLNLVPVPKMPVRLEMLLSDQIPAA  
VMPEPFLTTAKLRGAKILVSSDDSGLEAGVLAFFPSVIAKNADTLKRFYRAYWNA AQRIN  
AQP DQYRNMLIESLSFPDEAARVVFVPRYVKPRLPVQTSIETAAQWLLSKALIKALPKTA  
DLVDASMVTGW\*

>SPBIB\_v1\_380008|ID:27164131| putative aromatic acid decarboxylase [Uncultured spirochete bib]  
MAMRYLVCITGASGALYSLRLMSALASRGVILHVVASQWGARVLLQETGRPLGYWLGKLR  
LQGGPDGGPALITMHDSSDFSAPIASGSFRLNGTVIAPCSMGT LGLSLASGVCSNLIHRAG  
AVALKEGWPLIVPRET PLSLV SIRAMATLKEAGAVILSASPSFY SKPESIESLVDTVVY  
RILDHLGIIDKNIYRWSREEP\*

>SPBIB\_v1\_380009|ID:27164132| putative 4-hydroxybenzoate polyprenyltransferase [Uncultured spirochete bib]  
MALSSSTEPGILKRIGMIGDSVMITHLFLSLPFVVAAILLETEGRPPAAKLLWIIVAAF GA  
RNAANALNRIIDRDIDAKNPRTAGRHLPSGKLAPRELWLFTFAMLALLVLGAAMLNPLCL  
ALLPVAGLLLLGYSYTKRFTWLSHYWLGIACSAATMGAF LGISGTFHLRYFP LTAGVALW  
VAGFDIYALQDIEFDRKEHLYSIPARFGETGARIIAASHLGAFAGFVSIYLFWDSPGL  
FAAIGLALCFVLLVAEHLIAAQKTQNR IKLAA YTLNQIPIIYLCGVALDIYLR\*

>SPBIB\_v1\_380010|ID:27164133| conserved protein of unknown function [Uncultured spirochete bib]  
MAYSGLQEFISFLELKGELVRISA EVDPILEITEIADRVMRRGGPALLFEHV RGSRWPLL  
INAYGSEKRMAWSLGAESLDEKAGEIDSLIQWAWSQLRDFSLLSALPEALSRLPIARSLM  
PKKVGRAPAREVKDEGGFDLPIIQCWPQDGG RFLTLPV VCTIDPETKSQNWGM YRMQIY  
DDRTAGMHWIHKDGAHFFQKYRAQGRRMPVVVALGGDPA VTYASTAPLPEGIWEAMFAG  
FLRGKPAEVVEIGDTGILAPADAEFILEGYVDPDEERLEGPFGDHTGFYSLPDDYPV FHL  
ERMTRRKTVPYPATIVGIPPKEDCFLAKATERLFLPLLKQLCPEITDINMPLEGVFHNCV  
LVSIRKRYPGQARKVMHFLWGMGQLMYTKLIVV VDDD IPLKDL SMVAWRVFNNIDAKRDF  
EFS DGPLDALDHSSPKPRFGTRLGIDATRKWPEEGHDREWPDPLAMRLDIVELVNSRWKE  
YGIELD\*

>SPBIB\_v1\_380011|ID:27164134| ABC-type antimicrobial peptide transport system, ATPase component [Uncultured spirochete bib]

MSDIIISLDKVKKVYFLDAVEVEALKDISLDIHAGDFVSIAGPSGSGKTTILNLIGCVDK  
PTSGTVVVGKRTSDLDDDSL TELRHKSIGFIFQTFNLIPVLNIRENVELPLLLDNQSAG  
SQSKIESKADRKEWVDFLIESVGLKDRMLHKPAELSGGQRQRVAIARALVMKPAIVLADE  
PTANLDSATGESILRLMRHMNETFGTTFIFSTHDPDIVEEADHIIRLKDGR IIEDRRRNG

ASAALLAANLETAETGTEGGQL\*

>SPBIB\_v1\_380012|ID:27164135| putative ABC-type transport system, involved in lipoprotein release, permease component [Uncultured spirochete bib]

MIAARLAWGNLGLHRRKSLIGMIMGILILFIGNSFIDTALSGLQRMFVQGYTGDLMLV  
TGPTEFPTTVLGETAGSEEVLPHIAQIKKYEDFLAGRNDVAATLPLLSGQAAFGIGETEL  
DSGYCFGVNADDYRKFPPDNVTLVSGEWPKAGDGPVLLSEPTLAILNKSATSPVQPGTH  
IIMTALANSAGTVIREVTVKGVKFNQSNKQLEGLTLVDADTMRDLLGFASLRDGPVLT  
GQEASFVSNFDPNALFENLFASDTTGAAPAAAAPASTGREGSDPSISSATSTVPSAQAT  
VKADEVPAWQFLLRVKPGASSRLLSDLSAFSKQIADGDRVQDWIAGAGKVARTAVTIR  
LAFDLLVAVVAVVVMMIMNVLIISVNERLYEIGTLRAIGAKRRVVRNMILYETAFLAAI  
AGAAGLVIGFVVLLLLGKFGIRAPNLFFEALFGGQVLKPMVSAGAAIRAFIWILAMGLGA  
SWYPTIVALRIEPIAMRGD\*

>SPBIB\_v1\_380013|ID:27164136| membrane protein of unknown function [Uncultured spirochete bib]

MRLIHLKLAARNVRRQPHRTIALGGAVAFSALVMTLISGFVNGMDSA IQDNVTLYSGGHV  
LVSGYTVSWSGRLQSRFADEAVANIVQSAYPEIRTASISQTRATVVFGSREVQLSLRGV  
DWGKDELYHSSLILSKGDWKS LAAPRTMLMSAQTAARFGLSTGDAVLVRLSTASGQQNVT  
DYTVAAIYDDGAAGGMSTAFVAFSDLTADLNMKEHEQQAIAIFLKNSTSAENAAQTITKA  
LSEKGYTVSRGAAPTS GALSASSEFVSSVVGSGAAGTAATGTTTGTAAGSSGAGASRA  
AAGTVTYVSTVQELAGEISSALGSIRWIGYAVFALMLIVSATGISNSYRMVLLERTKEI  
GMLRCIGYKKKDV FSSFIAEGILLAGGAALVG VILGLPVGFGIGLVPFNPHGDFGTALVQ  
GHLKFVPSIGQLALILVFTIVAVAAVFLPAKKAADVVPVEALRKA\*

>SPBIB\_v1\_380014|ID:27164137| conserved exported protein of unknown function [Uncultured spirochete bib]

MVNMQRMTSKLSLVFLGLVLIFSAKAQGAPPAGGGQGGGAPMGGIGLPLGFLEQNKD YQ  
FPDDITKYSATDFLMLVRRDIRSSFYDSDMTATITTVSVSPDKGTFVRKEQIFRRDKDD  
AFLMLTLEPESRKGQGMRLVDNNMWRYDPTSRKFTHHTLKD TYENSTVRNND FRRWQRSI  
DYSVEKITTGTLGNYTVIIGELKANND EVPFPYIRMYIEKDRKIVLKVEEYSLSMKLLRT  
AYYTQYVQIGNSFVPTVQIFQDGLIPEKRSQV TYTDISTKPVDPDYFTKEYLERSQ\*

>SPBIB\_v1\_380015|ID:27164138| exported protein of unknown function [Uncultured spirochete bib]

MKARNRPVSIALAAAALLVLSAGGLWAQTGTAPASQTPPAIDENALFGGPKDIVTVIDP  
NVAATSVVQLVQDTKTYPVFLISGTAGAGLFGNYTPVGAASTDPQKLYGAVNLSGLEFDY  
LPTKSLHFSVSADLLAVPSEILSASVGAYADLRASEL VRLYAAGSFDYDPNAYLSTKTYA  
TPTFSLDELFDVDELGKKVFFRLGKQRISWGVGYWYKPSDVL SLSAIDPDNPTAAREGPF  
AFKIDMPMKLNHAMLVYVPPINGDAGSFS AASKYDLV VNGWELSFAGFGRTDMLARPRGI  
FTFTGAIGAFDVYGENVILYGS DRTYVQESSTAPGTYET YRVENIPFVQSTLGIKYSLSK  
SNGLSFSAHVQGYNGTGYADSTILQKSAARTAVEHSATYQPTDLTQAGMWYLAGSTSIS  
GRFGGRNLT VVTASAYALTNFSDRSVRFNPQLSVQVGDQGG RATLTLSDLTAIGALYSE  
YAPNGNKTTPALTLTVFDKLSLQASVPITLDTDFSIKKVQTAFS VFWNAVSY\*

>SPBIB\_v1\_380016|ID:27164139| Two component transcriptional regulator, winged helix family [Uncultured spirochete bib]

MHGRILIVEDTKELAELYQLYLQNEGFECLAFDAESALPLASNEEWDLIVLDLNLPGMD  
GFEFLERLRKIKSTSV MILTAREADEDVIFGLGVGADDFVTKPCPPKVLAARVRAHIRRV  
VALQTRQNGAIVRFGPFELDIEGMYLTKNSEPVSLSAREFNILKELVMHPGKPFPTPEDLY  
AHVWGQEFGDISAVAVYIQRLRKKLEDDPANPYIQTQYGMGYRFNPEAF AEARP\*

>SPBIB\_v1\_380017|ID:27164140| putative Integral membrane sensor signal transduction histidine kinase [Uncultured spirochete bib]

MKLLKRTQFAILTIAVTLFP IAFGLWFFTGQQAKRDPRQPTQLFLSEVAQLWSKDKNLTF  
ADIRDAGERAE LPIIDAALIDADGTVLVSSFKGLPAGSKLQVADLARPP LMPQGKPGPEL  
RFLPVDNSVTKSPLLLFDIRPFWTREDVRNRNFMLISSFALGAFLVAGLMSLLILRSTNT  
AIKNLIDDTT TVASGKLDHEVKGSGAEELRSLAD SINHM RITLRDMISR RMNMLIGVSHD  
LKTPIALIQGYTDALADN MASNEATRQHYLEIIREKSAQLEDLVSDLIEFMKIDDLNMPM  
ETVDLGSFVLALGKRFEEDARLLGLEFVYGFSGAFSKEPPDGALADAALRGVPHGAAPSS  
ARQSSAALHIKMNRMLVERAIENLVSNAFRYTG TGGRVEFSLQFDSGQPVLV VADNGPGI  
PEEELPYVFDAFYRGTHSRQEAGHGLGLTIVKSIVDLHGWEIEAHNRTVDGAAIGVAAGS  
AASHGLLIAIRMKAAAL\*

>SPBIB\_v1\_380018|ID:27164141| conserved protein of unknown function [Uncultured spirochete bib]  
MHISEIQLHRISDSELEALVDKTIEASGALLAKCILIPDITRFHSRAGQITDALVAK  
LGPRVAAILPALGTHSAMTEEERAHMYPGSPSQLFKVHDWRHVDVELGRLPEERVSEISN  
GKVRYSYPVQANRLTSGDIDFISVGVVPHVEVAGMANHAKNIFVGTGGKEAIDRSHYL  
GAVCGMEGIMGRADTPVRALFDEGLSLAAGKLPITWILTVIGSAEDSSLALRGYFSSQD  
RRCFEEAAALSARVNIQLEKPIQKAVVWLDPEEYRSTWLGNKSIYRLRMAMADGGELLI  
LAPGLRSFGEDPNIDTVIRRYGYRPSSTEIQTLVAREPALADNLSAAAHLIHGSSEGRFRI  
TYAPGPLVSKEEIESVGYQWADLGQALQRYTPQGRLTGSHSTRDGEPPFFVQNPALGLWS  
TAARMQNTRSLRPSMRLG\*

>SPBIB\_v1\_380019|ID:27164142| conserved protein of unknown function [Uncultured spirochete bib]  
MKLSRFSIGTGDRFGMEGEAQIGAFQQLREHGGEADIVWNKSNREHVIIGSTPADQAKAA  
AEA VKHAGWNGNWFVDADHISLKTVDWFLPHCNFFTIDVAETIGKQAPADARAA YLLRAS  
FLLKEGA AIPVAKADLESVADKFLAAVLEAGTTYRYIAARKPAGSFVVELSMDETDA PQ  
TPAQLAAILVAVAAEKIPLATIAPRFPKFLKGIDYVGDPAEFLAAFEAETR VVLWASSA  
LGLPEGLKLSVHTGSDKFSLYGGIHEIVTKLGAGLHLKTAGTTWLEEIIGLAEAGGEGLA  
IAKRIYATAYARIDELTAPYANVVEIDKARLPSQAVASWSDTFIRALRHDPGSTAMQA  
DLRQLMHVAFKVA AEMGSQYTN AVRAH HASVARNVQHNL YARHLAPIVLGSTRRL\*

>SPBIB\_v1\_380020|ID:27164143| putative Integral membrane sensor signal transduction histidine kinase [Uncultured spirochete bib]

MQKPHAESLKSSKRFPRLGIRGKILACFSIVLAFFLGLAVVMQNESIQLSREYGVNLSY  
HLVHRFRLNLANFHGLTDRYLREPLSANPELIYNGIASLNAQYAE LPLEDYSIHAGFEV  
RATGYGLDVYLPLVSRAVGLRAGGSPDYQAFVKATRIQGYIDVYLNRLSELMQSGEET  
YAKLSRRSEILNKTILLSMIIASILAVIVIVLVTEAITAPLRKLAKEAEKLASGDLEAGI  
VEAHTNDEVETLARSFASMASNIRAMVEGLKEKAELERLLHEEELALVSMGKALREAQFM  
NLQEQMKPHFLFNALNTIARSALLERAERTESLALGLARLLRATIKDSGALSSLEEEITL  
AQAYIEFQHARFGDRLKWKIDVPSALQSLKVPRLMIQPLVENAVRHGLEPKVEGGTVYIK  
ARRRNTSLILWVLDDGVGISKEKLEEIREHIVFSLELKNRKPEELPVPTDAELPNSDPGE  
SENELLNGTGIGLANLATRLAILYSGQCRFDIQADSDKGT LVRIMIPLGATTS\*

>SPBIB\_v1\_380021|ID:27164144| protein of unknown function [Uncultured spirochete bib]  
MIRILIADDEALERE AISHILRHIHLEEECVVDQAVNGYEAL EAAEKYEPDIAFLDIRMP  
GMDGLEVAERLSRLGNPPFIIMVTAYDSFAYARMALRYGVLDYLLKPASSEIEAAVRKA  
IYQIRRRREEAARRAEMHSIAADMEQIARMNIVDQLEAGSVADSDVTRLVKLRFGTEMWS  
CAAIVAGARDGSSSASLSLALLEQHRFLSGIAERHLASDLGIPENLPSLFFAGSGERITS  
MLLVAPFLDEKRSAESEPHAAFHAFQHRSRLAQFRYRCIDAGAGDLRFGACVSDAGLAS  
AALAAAKAAFNLTA AECPIVLSPMPLAHGREAAAAGSLAGRTISWLQDHFMESIGLADA  
AEYLHVSPSHLSRMLK KETGIGFGEMLV RTRIAHAKNLLANGIPAKEASFLVGF RDQSYF  
TKVFIKVAGVSPSRYLDLGR\*

>SPBIB\_v1\_380022|ID:27164145| TRAP dicarboxylate transporter, DctP subunit [Uncultured spirochete bib]

MKRMHKAALILMLILVPAMLFAQAKPIVLR LAETHPKGYPTELGDEEFARLVKERSGGRI  
VIEVYPGSQLGEEKAVIEQVQFGAIDLTRVSISPLASFVPKLN AFQMPYLYRDS DHMWKV  
LKGDIGKELLASLEPF GFIGLWFDGGARSFYNSKKPVRTPADL KGLKIRVQESLMMGL  
VRAFGAVPTPMPYGEVY SGLQTGVIDGAENPPSYFSASHYEVAKY YTLDEHTMVPEIII  
GSKISLGRLSKADQDLIKQA AFD AIDYQRAQWAA YVKLSMDKVIAAGCTIIPVPDKTEWI  
KTVQPMYKTQSKEIQDLIARIQAVK\*

>SPBIB\_v1\_380023|ID:27164146| conserved membrane protein of unknown function [Uncultured spirochete bib]

MKRTLITIVTLIHILLINLSKLMIVAMLLLVFANVVLRYVFNSGIYWSEEIALVLEVWFI  
FLSLGLGVKHLHISINLVKRESMPAWLNKALDLLADIVFIIVGAVMVIY GIRLTQFTMR  
SIMPATKWPAGILYVLPLSGFVVIVEALFHILGYNMFDEKIDAYLSGKGGKLGDIRSE  
S\*

>SPBIB\_v1\_380024|ID:27164147| conserved membrane protein of unknown function [Uncultured spirochete bib]

MTDPTIATVILMGGFALLMVL RVPITFSLALASIA TATYLNIP LMAIVQQMVQGVKSFSL  
LAIPFFIIAGEMMGRGGIALK LINLANVLVGRIRGGLAMVNVVESMFFGGISGSAVADVA  
STGTIMIPLMEKSGYDDDFSVAITVTSATQGIIPPSHNMIISVAAGGVS VGRFLFLAGF  
VPGVTLGIALMIISYIISIKRNYPKEKKYSFKEAVKIFGDAFLGLMTAVIIMGGVVSGVF

TATESAAVAIYAFIITFFVYKEIPLKEFKGILYSTLKTLMVMALIASASAFSWLMAYL  
RIPAIATEFLISITNNKILLMLINVLMLLLGMIMDMAPLILVTPILYPVVVGKLGKLS  
IHFHILMINLAIGLCTPPVGSALFVGCVAVGKISIEKAAKAMIPFYFVMVIVLLLITYVP  
QITMFVNLIMPGG\*

>SPBIB\_v1\_380025|ID:27164148| 3-oxoacyl-(Acyl-carrier-protein) reductase [Uncultured spirochete bib]  
MSFVESLFLGQKVVVVVTGGGALPSSMAIAFAKAGAKVALWGRGTHHPMSEAADEVKKH  
AGLPAESRQVFGITVDTASTDACENAFDET VHSLGMPDILLNGVGGNMGRSSFVDFDEKV  
FEEVLRNLNLMAGLMVPSRVFARRWINAGIKGSMINMTSMASYRGLSAVWAYDAAKAGVLN  
LTQALAKELAPYGIRVNAVAPGFFVGNQNRALLFDEKTGELTPRGKAIISRTPFGRFGEF  
EELWGAVLYLASEKSAGFVTGVSIPVDGGYLSdni\*

>SPBIB\_v1\_380026|ID:27164149|uxaC| Uronate isomerase [Uncultured spirochete bib]  
MAHFIDENFLLKNETAKRFFFGTAKDLPIIDYHCHLSPKAI AEDKPFDDIARMWLEGDHY  
KWRIMRANGTPESLCAGDGPWEEKFVAYASALTKAAGNPLQQWSHLELRRIFGISEVLT  
HNALKIREEANRVLATKKISPRSLLEQFNKVICITDDPIDDLHWHKAI ADEQRAGSAFQ  
TKVLP AFRPKAMNTADIAAWNTYVDALGKSAGIEIGSYAALAEALARRHAYFHAMGCRL  
SDHALLVPVFM PASESELDAIVQRARNGTVLSASEQAKLMTAVLSHLARLNAQKNWTMQL  
HIGALRNVNHQLFKAFGPDVGGDCTSDEPIIPLA AFLGALDSERKLPKILYSLDPAKN  
NPLVALAVSFTGASPFESGAKGSSRASGTMQVQVPGKVQVGA AWWFNDQKDGMERHLKEY  
ASVGLLGAWVGM L TDSRSFMSFPRHEFYFRLLCNTIGEWVEAGELPDDPLYTESV VRAIC  
WENAASYFGML\*

>SPBIB\_v1\_380027|ID:27164150|ugpE| glycerol-3-phosphate transporter subunit ; membrane component of ABC  
superfamily [Uncultured spirochete bib]  
MAELTHNSNKA AHRACLIRRTFPHIMLWIGIAIIVFPIYFIFSASSHTSAEILAAPMPLN  
IGPHLIENYRQALFEGTKNMGTPVLTMMKNSLIMALGISIGKIVVSLMAAFAIVYFKFPL  
RNFCFWTIFITLMLPVEVRIMPTYKVISDLGMLNTYAGLILPMIVSATAVFLFRQFFMSI  
PREIAEASQIDGATPMEFFSHILVPMTRTPVAAMFVIQFIYGWNQYLWPLLITTKPEFYT  
LLIGINRMMMSGADVQIEWQIAMATTLAMLPPVLVVVIMQKQFIAGMTETEK\*

>SPBIB\_v1\_380028|ID:27164151|ugpA| glycerol-3-phosphate transporter subunit ; membrane component of ABC  
superfamily [Uncultured spirochete bib]  
MSKQYEFKAPILPYILVLPQM VIVFIFFFWPAAQAILQSFYLQDPFGGRMIFVGFQNYSR  
LLADPDYWQSFTVSTAFAVCITVGAMTISLFLAIQANKKIRFASFYKTMLIWPYAVSTLV  
AGAIWLFMFNPVGVIA YMLKHTFHVDWQYLLNFNQAFLLTLAATWKQLAYNFVFFLAG  
LQSVPATLIEAAEIDGASPSTRFWKIIFPMLSPTTFYLLVMNLVYGGFFETFPPIHQITQG  
APGKSTGILVYKVWRDGVINLDLGSSAAQSVILMIMVILLTVFQFRFIERRV TY\*

>SPBIB\_v1\_380029|ID:27164152|ugpB| glycerol-3-phosphate transporter subunit ; periplasmic-binding component of  
ABC superfamily [Uncultured spirochete bib]  
MKRVILLMAVLLMAVGAYAQTTFEFWHAMTGHNGEMVQVIADKFNASQKDYKVVPVYKGS  
YVDTMNAGIAAFRAGNPPAIIQVYEVGTATMMAAKNAIKPVYQLMAENNMKWDPNMYIPT  
IKSYYSTSDGRMLSMPFNSSAVMYYNKDAFRKAGLDPEKPPVTWPEFFEVAKKLKASGM  
EGGFTTNWISWIQLENFSAWHNLPFGTRSNGFDGLDTQLVFNSPIHVRHFQNM YDLSKTG  
VFIYGGRENKANPLFTSGRVGLHFESIGGYGNMKANCKFEFGVARLPYYPDVP GAPQNSI  
IGGASLWVFNGRPQAEYKGVAEFFNFISQPEIQSLWHKETGYLPITNAA YELTKSEGYYK  
TNPGLVAIKQLLNKAPTANSMGIRFGNFQIIREIEDQVWEDILAGKISVKDGLDKMVRD  
GNKTLREFEKLYK\*

>SPBIB\_v1\_380030|ID:27164153| Glycerophosphoryl diester phosphodiesterase [Uncultured spirochete bib]  
LPEKARSSTIKLMKHCIACILAFLLSFASVSFAQPDRPMQANLSMEKIIMQTSRPLVIAH  
RGFRGIAPENTLVSAQKGF DAGADMWELDVAA SSEGELVVIHDNTLVRTTNAASIFPKRS  
PWTVYDFSLAELKSLDAGSWYAL TDPFKQIKSGRVA AKELQAFAGLQIPTLREALELTR  
LGWRV NIEIKDATGFACDAWIVEKTAALIRELDMVPSVLVSSFNHEYLRRMKKTAPEIAV  
AALIDKPIEDPVSVLKEIGAV ALNPNAKYLDEATVRTVRAAGFGVLPWTVNDPADMKRLI  
QWGVGTGIITDFPDEGLKQVAGHL\*

>SPBIB\_v1\_380031|ID:27164154| MutT/NUDIX family protein [Uncultured spirochete bib]  
MIAGDNGARKWAMLSSRKVYECNVFSVFERESRGP DGRVGRFAVMEAKDWAVVVPYVRT  
ENGTSFLMVRQYRHGADEVSLFFPGGVVEPGE EPAHAAARELAEETGWVSARILHAGTVF



PNPAIQDNHFHVVALDPEPKVTRNLDNSNEIIDAHLMPADEIRQKMGTGELRHALMVVAL  
FLADKCVAAALDEKPARQAES\*

>SPBIB\_v1\_380032|ID:27164155| Fumarate hydratase class I, aerobic [Uncultured spirochete bib]  
MPHVSIEQFISFGPESEFEPLALPRPLQANGRIILEPESIRECAKLAFSRIAYKMPRSQ  
AAFSAVLESPESSVNEKFVAASLLENARIAAKGTYPICQDTGTALVYGWRGDQVDIVHNE  
EIEDLLAGGTAEAYAQESLRNSQLGPISMIEERNTRDNLPAQIQIRSVRGDSLALVFAK  
GGGSTSRTSLTMESPAILRQDRLEETLRKRIQSLGSPGCPYTIAMVLGGTSPSETLYAA  
ELAALGLLDNLPQSAGDDGTPLRDRFWEEKMLEIAKESGIGAQWGGVHLAAATRAIRLSR  
HAANLPLAVAVSCAANRHAIAVIAGPKGWAIQKLAHYAKDSYPSFETLRKDVFDAAPHIEL  
SKSSQDWLAQLRSFDAGTIVTLSPVIVARDAAHARLLKILEKEKHLDPDWFLGLPVFYAG  
PTEAKPGHATGAFGPTTASRMDSYLEPFMNAGGSVVTIAKGSRGAEAKKAIHAHQGVYCA  
AIGGAAALNAAHHRSLSHQFEDLGMEAVRAATLETLPVIAIDARGNDIYSKE\*

>SPBIB\_v1\_380033|ID:27164156| conserved protein of unknown function [Uncultured spirochete bib]  
MDATHADVALLRCEDYDRTKLDAIIAQAAEIAAGFPDVRGATILVKPNVLNASPAKAVTT  
HPEFVGAVIRFALSQGAKEVLVGDSPGWQPGALAAKTSGIYDAVKQNGGKWVDFREASPH  
AVNHGKRLRNIPLTWLEHVDIVINLPKLNHRLMTYTGAMKNLFLGLIPGTAKSAMHMQY  
PGVMEFGEMLVDLALSIPRCFTFMDGIVAMQGEPPGSGTPYSLGIVLASQSIKLDWIAA  
RCVGYDPALIPYLADGLRRTLQSEAIIEPAISPLSVQDVSHEGFELLPYHSELGRKLGAI  
PNAMRAFAGSLIRLRPVFHTDKCIGCGACVQICPANALALDSKNKTHIVRIDDKLCITCF  
CCEHVCPAKAISIGRVPMLWHRAKRS\*

>SPBIB\_v1\_380034|ID:27164157| protein of unknown function [Uncultured spirochete bib]  
MRYILVERVPRRMAIRLDRNNWVYYIGRGSNLRILLFSIGCMLFLLGSSFRPAPGPLSAR  
GGSDATPFAASEDIVMPEPEDKLVKYTVYEVKRGDTLSGIAAQFDVSLDTLISINAFSTA  
KALKPGQLLKVPNQSGIVHIPTKDATVQEIAAAYNISADRIIDANGLLTENIHAGRPLFL  
PDVRLPAAQLREIAGTLFRWPVSGRITSWFGWRKDPFTGRRSFHNAIDIAAPYGSPIKAP  
MDGRVIETGYSPILGKYVMMSHSGGWKTLYGHMSEIVVQEGQYVSQGRTLGRIGTTGYST  
GPHVHFVVIKNGSLVNPLNYLP\*

>SPBIB\_v1\_380035|ID:27164158|ptsI| Phosphoenolpyruvate-protein phosphotransferase [Uncultured spirochete bib]  
MRITKGIAASPGVSIAPAFLFIDDSADIPQYHITTADIPAELDRFHEASLLAKREIEALR  
DRAKLEAGEEQASIFDAHLMMLLEDPEVLDQIERSLNENLNFVESAILSFETEMVDKLS  
PDPLIQERVSDVHDVIRRLGHLLKKERISLADLETEVILVAKDLLPSDMVGMRSRMIK  
IVTESGGRTSHAAILARAFEIPAVLGVGNFVEQVKPGQSIYVDGDKGVVAIDPDEIFIQ  
REKAARVARIQREKENRELSIPAQTKDGTRISLVANIEMPDEVANVIEYGAEGIGLFRS  
EFLFLGGHVPGEQYKAYSKVQAMEGKPVITRTLDIGGDKVLPGLGAMGEKNPLLGWR  
AIRFCLEKTELFKTQLRAILRASIHGKIKIMFPMISTIDELIRAQGLLAEAKWECKAHGY  
EIDPNIEGIMIEVPSAAICADVLRSCDFFSIGTNDLSQYTLAVDRGNQKVAYLNEPYS  
LAVLRLIRMTIGYGEHAHIGVSLCGEMAADPASAVLLVGMGLRSLSMSASAIPAVKRAIM  
SVTIEQATALAHQALSMNNSAQVSALLASKLSL\*

>SPBIB\_v1\_380036|ID:27164159|der| GTPase Der [Uncultured spirochete bib]  
MNKTSQEDRQLKKPKSIKRSASADSSAPKRKQTSAPAASQTNEEAALPAFRYENLPLVVL  
AGRPNVGKSTLFRLLGKRRAITDPTPGVTRDPIEECELRGTDKKVIVVDTGGFKIERE  
GLDELVVARTLAYIERANLVLFMVDAMEITPEDEEFAAFLRPYAKKLILVVKADSPERD  
ALVWTHAKWGFDVPLFISAEHNRNIDELSEAIAARLDFTSVRAVEIEKADIRIIMGKPN  
TGKSTLLNALLGQERSIVSSEPGETTRDIVEGRFTWKGRGITVLDTAGIRRRKKKVTDNVEY  
YSVTRSIADVNRADIVILLIDAEGLSDQDKIAFAVEAGRPVVFALSKWDMKPKMKNA  
FEARDRLRFFFGQMAFAPVVAISAKEGEGIDKLMSTIISLYSKANRAIETAKLNQAVAR  
WIEETPPPAGPRTRFKLRYAVQASMNPRFIFVTRPEAVAESYRSFLKNKLRLEFGLDG  
IPIQLELRASHKDRMRS\*

>SPBIB\_v1\_380037|ID:27164160| protein of unknown function [Uncultured spirochete bib]  
MPYLSIGQLERLISVPASTLRFWEKTVPFLTPMRSKSGRRTYSLSEAALIARLKLALDR  
KFLGRQAQQLLEFELLYGDQDMRAQINALRDEILLVLDCEKWREEFEEIRAAITSEKEF  
FNGPENQALDGIH\*

>SPBIB\_v1\_380038|ID:27164161|apeB| M18 family aminopeptidase [Uncultured spirochete bib]  
MDQKIKRLMEFIDASPTPYHAVDNLIGMLDAAGAQLDERQVWQLEPGAMYVVSRSNSL

IAFRMGLRFSGDTGFLLAGAHTDSPSLKLRPEKQLKSKGYLRLALESYGSPILSGWLD RP  
LGVAGNVAVREGSDIHSRLFVSDKPFVAVIPNLAIHLNREINKGFEYNLHQMPAVFGLAR  
AENQEQSAGGSHAEREISEILERIGEQMAVDPANIVSADLRLFDYGPSQIIGEELINAP  
RLDDLCLAGCLAVMEAFSASEAQEATQLACFFDAEEIGSMTPGGAQSAYLRDILARIVLASR  
NSGQDFYRALANSACISVDASQAWHPGYPEKDFEFYTPVLGKGIKAVKSNANMNYATDFTS  
LQIAETAATAKAHLQIQRYMARADIQPGKTIGPITASRTGISTVDVGHMPLAMHAIRETIA  
ASDHLDMIALLRAFYS\*

>SPBIB\_v1\_380039|ID:27164162| exported protein of unknown function [Uncultured spirochete bib]  
MKFLRRFLPLLVVVALIFASCATNTGQVPTGTETPPTVTQGGQPQPQTPVPQEPSAEKYE  
LQNLFAQANTLKTEATDFALGSLPDKFLEANREHDAVSAEYKDLVETPATYDGVKAYPL  
KEKLEHLVSTWDSLIEGEMPLRAGVEKDSADEMRFAAMNVDAPIQAPTQYDAGLQYYSSQA  
AMFADASNYAQAISTYQFAAAAFGNSAAAQVNSLRSDIEKNDYGGKYESIQMYFTMGEEK  
YKEAQDLWAKGTLDDIAASTAALKEAQTYYSFVDTKGAELEAFEGKDKAASAQQEALSVK  
ADINAPDEYQQALDILAEAEKNMADSSYVSAYSWYLDAASAFGTAHDAATARGPEVAEAI  
AKAESNLADAKDRASELGLEENIYL TAAAEHLGKAKALKEELQYPDAIFETNEVANYIGL  
SDNLVQQEAQIREKARIEQLKKDKAAADQAIADAKTRIAWADQVCLKDDYPKEYASASSS  
MAAAEKAYEIEKYVPAKTLAEQVSSTLSDEFQQQVLASREAAKAKAAQAEERLKAANK  
QAADVAISDAEARMANENSVRTDYPDEYKSASVAMVGAYVAYGNEDYVVSQKAEVVS  
SILSNDFQAQVAADRAAKAQLARDKAEADQVLPQARARMANANIKADYPTTEYNSASA  
AMTAAEKAYQAEKYAPATTLAKEVLSTLSPDFEAKVTSEAAKQMQDEIAKAGKAADALG  
KAHSRMANANQVNLVADYPDEYRDASTSMQAADTAYSENKYDATTSLANDVIRILSDDFI  
AQVNAEQAAKAQLARDKAEAEAVMAQAQARMAWADQANIKTDYPTTEYNSASAAMTASEKA  
YEVERYAPATTLAKEVLSTLSADFEARVAVERAAKENQAKIAQNQKDAEAALGQAKDRYD  
WATSKNAKNNYPDLKQGGALADANTAYNAADYVRAKLANQAYWTLMQIDEFAPLPAT  
YKVRILPERRDCLWRIAEYPFVYNNPYKWPVLYEANKKTFKDPSPNPLIFPGQILKIPSI  
KGEVRQGEWDAKKTYQPLAK\*

>SPBIB\_v1\_380040|ID:27164163| protein of unknown function [Uncultured spirochete bib]  
MRANAICRPHISGRKHIRAAFIGAAALAWMLWDGCSYSHSFPAGFVRFAPQLDAWENRS  
EGFCLVLVSSSDRAQGFLEWNSQGIYGRIVQAQKNGNTVAITLGDGGMNGLQLSIFLKRK  
SIIAEYFRKDKSALQPFRIEAWHVSSEEGMRVLGATFVEKLPNEGALSLRLQYVSAQDAA  
RSRILDEILRRGMSPYNMAELRLAQKQEA AVAVQNRAPPPQEYEEIEYPVFISDQYLSIA  
TQHLYFDGGAHGAASTTFDIIDRAEGKRLSAQDIFAGDWKAGLKL LLAELMRQSAFWGN  
SGQEADLKALGLFESELYPSDDIFVCAGGVGFQYDRYQIAPWYMGEFIIILPWNELTSYL  
SPAFKIPQ\*

>SPBIB\_v1\_380041|ID:27164164|ileS| Isoleucine--tRNA ligase [Uncultured spirochete bib]  
VYKPVDPKVNFPQEQESVVQFWEERNVFKKSISQREGAPEFVFDGPPFATGLPHFGHFV  
PGTIKDIVPRYKTMRGYRVERRFVWDCHGLPVENLIEKELGLNSKTDIERYGVAEFNEAC  
HSSVLRVYVKEWRQIVTRLGRWVDFDNDYKTMDPDYMEIWWVIKSLWDKGLIYEGYYILP  
YCPRCSTVLSNHELSLGGYKDVHDP AISVRFKIVGVLASNKDPALADLANGSTYFVAWTT  
TPWTLPSNLALALGPDIDYVCVIDGKERYILAESRLSAYYKHPESLQIAWKKKGHELGI  
QYEPFLPYFADLSAKGAFVTVLGEHVTTEDGSGIVHTAPFGGEDDYEV LKGTGIPTVCPV  
DAECKFTDEVPDYKGFVKDSKAIMERLQEGKLIKRDQILHAYPHCWRCGSPLIYRAV  
SSWFVKIEPIKEAMLRANKSIYWLP AHIRDGRFGKWLENARDWAISRNYWGNPLPIWKC  
DTCGKTICVGSRKELAE LGGDVPEDLHKHHIDKVTLP CSCGGTMHRIPEVLDCWFESGAM  
PYAQNHYPFENKEKFDEHFADFCIGLDQTRGWFYTLTILAAALFNKPAFKACVVNGLV  
LAEDGKKMSKSMRNYTDPSEVMDKFGADALRLFLMNSAVTKAEDLCYSDDGVKEVLKSVI  
IPLWNAYSFFVTYANIDGFTADGFDCTDVENPLDKWILSVCEKLVADVTAGMEAYDMQAA  
IGPMVEFVDSLNNWYIRRSRRRFW KSENDADKKSAYRTL YRVLRRRLTLVMAPIPVFTET  
IYQNLKLENEPESIH LANWPTEEPQYRNLELERDMRIVRQAVSMGRALRVANDLKIRQPL  
ASVQLITRQPEEQEVLARMEDILREELNVKSVFVHEKEEDLVEYHAKANFRVLGKELGAE  
MKEAAKIAALDTS AIKRILVGEQVPLTLASGRVSLDASKVEIVREEK PGLKVLNEGTL  
TVALDTTINPELLYEGYVRDLIRGIQNARKEAGLEVTDRIKLALFGDDELHTALERFSQL  
VAEETLAVGIEWTKPKDGITVEAGEKSWTVSLQKA\*

>SPBIB\_v1\_380042|ID:27164165| exported protein of unknown function [Uncultured spirochete bib]

VKCQGVRRMLLCQPTPNLFSCPAPSLVLCLVVGLLAAANPMAANAQSASLVFTTATGALA  
GIAAPGSIAQGGFDEEIALKGRMNTGPVRASALISASLSSGYAALARWYGSSTQTMRF  
WPGWTKGALAPDVLAAIEIQELALAVSAGHLRFEAGKFKWGVGKASRPSDIFRTMDYT  
SLIPVSKNLPVRFSSMSRIEALASIDGDSTITAGARYFTSISMGGSSANGGLTGGL  
SGGASSPFFVSEVGSFALSAGWRRKQGSADDEFAGSFELQVDAGPFAPYTEFSARTT  
DSTA  
YALAMLGTSLAISDLSTMEAQTALGQSSAGTQLFFLGTWKASDLTSISFPVFWLAD  
AHI  
LAASSIAQFQILGGRLDIFSATASWIFAGSPASFLWKIGAYWTRSLSTY\*

>SPBIB\_v1\_380043|ID:27164166| exported protein of unknown function [Uncultured spirochete bib]  
MKKASNYFVIISRFKAVFLFAAGALLMAQAVMAQGTGQDGGAAAAGSTAGSSREADAL  
LEAIDSAQRYSSISYIGLMEITQGSRLVKKQFIANARGSDKVILEFTNPEDKGRMLRLG  
STIWMYFPSEGETVRISGSLLRQGLMGSNLSYEEVAEGESLREAYSAQIIEEMLDGRLC  
KLLKLVSSRTDISYPVRLWVDASRKIPLKIELYARSGILMKTMYVKEIEAIAGRQLPTK  
VEIVDALKKNSKTVFSIQSVKIDVAMPDMSMFSMEALTK\*

>SPBIB\_v1\_380044|ID:27164167| membrane protein of unknown function [Uncultured spirochete bib]  
MNLISYAWRNLLRNTRRSLLAVLSTFLATLLVVAGNGLTEGFLDSMVRNYAKNETGHVNI  
TTSSYRERARFLPIDDIADADQLVSEIEQMDGADAGAASAGSGITAAPRIRFSVLLSSG  
LFTKPAVAIVGDPEKEKSLMLNRNLPGGSYCDEPGTAIIGSGLAKDLGLKPGDKLKII  
ATRADGGIGFKSLKVSIGIFQTGTNALDGSIFQMRLDDAQNMLGMPGGAQQILVMLPDYRL  
ADAWQKKIGAVLAAHGQGQLSVLPWSAIGDYPKLILMTSSIYMAMWFFIALLGAFIANI  
MTMVVLERRETGILMAMGMPPRIILSFLLEGTMMGFVGLGTAAGIAFNAAFSRKGF  
DLSSALAGFSWPIDNIKPTISVSGVLAGILFCTVAAAIMSLPSWRASRMEVVDALKAV

Q\*

>SPBIB\_v1\_380045|ID:27164168| membrane protein of unknown function [Uncultured spirochete bib]  
MKASSVLFRIAARNVLRHRRRTLITAIVLTVGIAVFIMFQSLLAGMDRVTIDTAIDYDS  
GSISLRSPGSDPLFKNIAIKEPKAIDRLPALLPKGSTWTQRTRFYVQVSNWIDETPALA  
FAVEPEKDKEVFKTSSTVQSGAWVSPAKAVIGLDLAKDLGVRIGDLIAVTAILPDGSLNA  
IELEVGGIADLPLFSLSQAIYLSAQDAEALVGAPLPVTEIDIRIPPASRLDTLVAQSDA  
AASALEKAFSGIEAMSIGEAMRDYLAAMRNMKSKFAIYVVVIVLLISAVGIFNTVLM  
SMYS  
RIREIGVLAAYGLDPGQIKRLFSLEGMLIGIIGSAGGVLLGAVFVWWLTSRGIAFGGMFG  
NLDLGNLPKNLLIKGEWNPLAFIQSFSFGVLVSWLASLMPARKASHIEVTEALRFV\*

>SPBIB\_v1\_380046|ID:27164169| conserved protein of unknown function [Uncultured spirochete bib]  
MAEIIISLSDVTKIYKGETEVIALKDIDLVEQGEFAAVVGPSSGSKTLLNIIGCLDS  
PTRGELSWRGAPMKSMNRTQLAAYRRMHVSFVFQSYNLIPVLTVAENVEMPLLI  
EGMHDR  
TAIRERALSIVEMVGLSDKANRYPTELSGGQEQRVAIARALVKKPSIVLADEPTANLDSH  
TAGEIIKLMREINEKTQTTFLFSTHDPRIEMELAQRVITLRDQGIERDERGAP\*

>SPBIB\_v1\_380047|ID:27164170| Transcriptional regulator, ArsR family [Uncultured spirochete bib]  
MNLPLDKIIHERARLRILASLSSQPARTCTFTELRLDNLDMTAGNLSQLSVLESSGYIL  
IEKKFKGKKPLTEIKLTELGNEAFRNYLETLDSMIAALKPHT\*

>SPBIB\_v1\_380048|ID:27164171| membrane protein of unknown function [Uncultured spirochete bib]  
MNISDQKLKEFEAALREIREAASHEAGIFHDKDLRKTFIWLSLGFSSIVIVAFCIAGHFLI  
SESGTSGTSSAGIIFWTFAIMLAVGAAIKITLLSRIMSRKNKSIASLLRVIYKGPASVI  
IAALLAVVICVFLVTEGLGPLAVSMSAIFAFAVFALDIRIQLPEFSALGWTLALGLV  
SLFFIRGSPWLWGGIVWGGSFVSLGIAGIVASRAS\*

>SPBIB\_v1\_380049|ID:27164172| protein of unknown function [Uncultured spirochete bib]  
MRTEGVDIDFRFLEDVQSTENIRRVIRVSEGDVSVAVSNDSDLRYSIELEGIPGEIDAW  
SCSVRAESIAILDAMANDFVRIAKCNIHVPSYISDIEVHSSRGSIEVRDISANILVISE  
RGSITVSGAKFVEASSVNGSIHIENSEGCSARSIDGNLVCHRISGSVQAEMQNGSVTIDQ  
VAKNVAVVSDQGKISVRRVGGRVRLISNKGDVELEVSGPFGGGEIQTYSGDISIQL  
EHSS  
VEFRAETLSGRIDASHPVNSAGMGPQRCAFRTGDGARRLYVKSVLGDIEVN\*

>SPBIB\_v1\_380050|ID:27164173| Long-chain-fatty-acid--CoA ligase [Uncultured spirochete bib]  
MADTIPQMFIEVTSKQPDVNVQLSKDSQKGFQPTTYQTLLREASICALGLRNLGIQRGDR  
IGFISDNRKEWLIADLAILGLGAADVPRGCDATAQEIAIYLSWSECAFAILNDRQLQKI  
LDIKASRLPFGSQLTEAPYAHLKTIILFDPPTSAISEEAARNGLQVLLFSDIMDTGRSL  
YATDPDFYTKEAKAGARGDLATIIYTSGTTGDPKGVMLSHGNFLHQTEYLPSSIIGVKS  
GE

IFLSVLPVWHSFERVVQYIILQAGATIAYSKPVGSILLADMQAVQPHWFTSVPRIWESIK  
DSVYKSVRQSSAVKRAMFSVFIAIGEHAHYFRNMLLDRLPKFSPRSRAVDIGVAVIPFVL  
LSPLRALGDVLFVKKIKEKLGKRFIAGVSGGGALPPSVDKFFDALGILILEGYGLTETAP  
VLGVRLKNHPVSGTVGPIHRGTEIRIVDEHGALPPGHKGVQVRGPQVMLGYKRPDLT  
AKILSQDGLDGTGDLGMLTVHGEIKIVGRAKDTIVLRGGENIEPVPIEQRLGESAFIQQA  
VVLGQDQKYLAALIVPRQEALIAWAEENEIPFNDYPSLLDQPEVKELIDSEINSFVSMKN  
GFKPFERIFRFALLPDPFEPGRELSAKQEMKRFTINELYKKQIRELFAE\*

>SPBIB\_v1\_380051|ID:27164174| putative tRNA-dihydrouridine synthase [Uncultured spirochete bib]  
MVPFPRGSLFLAPMVGITNRAFRTLVEYELGAPDWFVTEMASAEAFSLGGRNESIYLDPSP  
RSLQTSVQFAARSPETLAKACNAVSQLPAEYRPAGIDINMGCSAPHIKGYGRGAALLDNP  
SLAREMVAAREQWVGMLSAKIRISTSLGEDGTIALAQLASAGLDCITVHARLDTQKFR  
RKADHRFAVLLAEVLPVIANGDITNREECAALLDSTHIHSLMIGRAAVQKPWLFASLK  
SGAGAGEGERGTPGSSEPGAEPQYGTTRHMPEIDLLAIALRFIDLAETLLPPEWQRETCRR  
VFSYYAANVSFAHHLRFSLVNAPSLGAMRQILRDYFNQVPQDRIFAQDQILA\*

>SPBIB\_v1\_380052|ID:27164175|rpsP| 30S ribosomal subunit protein S16 [Uncultured spirochete bib]  
VSVRIRLKRFGAKARPFYRIVVMDSRSARDSKTIDELGYYHPIETEDKQLLINETKVRDW  
LSKGALPSDTVKSLLNKKGIQLG\*

>SPBIB\_v1\_380053|ID:27164176| conserved protein of unknown function [Uncultured spirochete bib]  
MERDLVEYIVKSIVDNPDAVNIKVIEGEKSTILELRVAESDIGKVGKNGRIARAIRLIL  
SAAASSQSKRVILEILD\*

>SPBIB\_v1\_380054|ID:27164177| putative Ribosome maturation factor RimM [Uncultured spirochete bib]  
MDKKQKAEYLAVARLGAVRGLEGEIKLHSYSGEFSHIEKAGEIMLGGEAGLEDARPIRIV  
QFLQGGWGASVIFEGFDTPEKARTLVGRELFLPREKACPLRPHEYYVADLVGMTATVNGL  
AIGVIAAVLDGGADALLEVKRDSGGSALVPFRKEFVGEIDEEKGELEILSSWILE\*

>SPBIB\_v1\_380055|ID:27164178|trmD| tRNA (guanine-1-)-methyltransferase [Uncultured spirochete bib]  
MNIKVLSLFPEILEAYFSASIMKRAVGKGLVSFELVNIRDYAYDKHRKCDDEVFSGGAGM  
LLKPEPLDRALAAAGSPEVRTVYVTPSGRLFNQAMAADFAKEENLVILCGRYEGIDQRIL  
DTRVTDVVSIGDYVLSSGEVAAMVIDAVYRLVPGVISGESLSEESFSAGLLEYPQYTRP  
EEYGNMHVPEVLVSGNHAAIARWRLRASLIKTLAYRPELLQTTIDLTGEIGRLLKEVIDGG  
GENEPRAANSGGTGKN\*

>SPBIB\_v1\_380056|ID:27164179|rplS| 50S ribosomal subunit protein L19 [Uncultured spirochete bib]  
MNLVQQIQAEQARTDLPAFRVGDTRVVSFKIVEGRIERIQA YEGLVIAIKNSGASKTFTV  
RKNSYGVGVERVFPLNSPRVDKVEIVKTGKVRRAKLYYIRTKVGKKS VKTLVGGRKSDK  
PEA\*

>SPBIB\_v1\_380057|ID:27164180| conserved protein of unknown function [Uncultured spirochete bib]  
MFALQKCAVQKGRDGEDEAVRFLKSGWEVIYRNFRSRRGEIDIIALRDGILAFMEVKIA  
NRFTQEDLQHVIKRRRSIIETS KLFLAMNRKYSQYHIRYDVILIAENACARHMEGAFA  
ENDEAE\*

>SPBIB\_v1\_380058|ID:27164181| protein of unknown function [Uncultured spirochete bib]  
MKQNKVSRDLPGWAGSTPDDFLLADYDIAEEMKASSWKRLYELKHKLIDDHYLDGAIASI  
AEMLSNRVKGKSR\*

>SPBIB\_v1\_380059|ID:27164182| conserved protein of unknown function [Uncultured spirochete bib]  
MNNEPNASPSKRPSGRFRSHSFRKKRPAKSSPSLEPTESQDPQAERVKKQELKICKVC  
GKPIFDLAGAIASRDDGEPHFDC AIEILSKEETLASGEKIFYIGSGSFAVCYQAPGGKL  
EIRRKIRWETAGSTQPWRKPMVSSPRLP\*

>SPBIB\_v1\_380060|ID:27164183|serS| Serine--tRNA ligase [Uncultured spirochete bib]  
MLDIRFIKENLEAVRQNIRDYMHADADLVVSLYDRRNALLRELEDARRLRNENAQAMKS  
PMSAEDRAARIEEGKRLKETIARLETTELQEAESFAVEMAKIPNMAHPDAPRGKEDKDNL  
EVKRVGSPTQFDPPKDHVELGQSLDIIDFDTATRVSGTKFYYLKNEAVILELALVRYAL  
DILSRHGFTLMATPDIKTEILEGIGFNPRGAESNVYTLEGEDTCLIGTAEITLGGYHSG  
TILDKSQLPIRYAGISHCFRREAGAAGQFSKGLYRVHQFTKVEMFVYCLPEDSGRIHEEL  
RAIEEIEFSSLGVVDFRVDCTGDLGAPAYRKWDLEAWMPGRNNGEWGEITSTSNTCTDYQ  
ARRLNRYRDDD GKNRFVHMLNGTAIACSRAIISILENFQQADGSRIPDALVPYCGFDV  
IRPRKK\*

>SPBIB\_v1\_380061|ID:27164184|prfA| peptide chain release factor RF-1 [Uncultured spirochete bib]  
VTERIDQMRARIAEIDELISRADMMRDQKYLRELMKERARLAEVVATFDETQSLAVSLHD  
TEALLEGETDPELRQLIEEELGQLRERFIRIEEKLKTLVMPRDPFADKAVIMEIRAGTGG  
EEAALFAADLYRMYSRYADSRRWTLVMSMSETELGGIKEIIFSSISGEAAAYERLRYESGV  
HRVQRVPATESSGRIHTSAVTVAVLPEMEETEIEIKPDDLIDVMRASGPGGQSVNTTDS  
AVRITHLPTGIVVHCQDEKSQIKNKAKALRILRARLYELEDQKRQAARSAERRSQVGTGD  
RSEIRTYNFPQNRLLTDHRIDLTLTKLDLVMEGDIDELLDALVAWGKQQAFESEGHALA\*

>SPBIB\_v1\_380062|ID:27164185| putative Release factor glutamine methyltransferase [Uncultured spirochete bib]  
MTVRELLLEAARTFSGSDTPFLDAVILLAHS�DVPKEKILAMLPEEACDVPASFFEMADR  
RRRGESIAHIRGFREFYGRFTLVNDDVLSPRQDTEILVEAVLEAGDMCASMPNASRPLKV  
LDLCTGTGAVAISIAAERPAAWHITASDISLKALEAAQQNAHRLALPSAVEFVASDLFSG  
ILGQFDIIVSNPPYVPRQAQAEQLISDGWKDPLVALDGGIDGMDFVRAIIAQASEFLYKNG  
VVLEMDPSQVSEAVALFKLAGFCEIRIWKDLAGRERVAGGRY\*

>SPBIB\_v1\_380063|ID:27164186| (P)ppGpp synthetase I, SpoT/RelA [Uncultured spirochete bib]  
MDELAQNFLSKAEIRFTAERKRDILSSAVMYCQHSHGDKKRASGEPAFYHDLRVAEILLDL  
GMDLESIIAGLLHDTV AERVSGYAPGQAAQAASRRKVPGASEPARTERSKSEKETGTLNS  
LLAAPNPQIEEMYGTDTALIVAGVNRLLSSVRAKNKSVHAAETMRKMLFALTSDIRVILVK  
LADKLDMSRTLKYLPEDRQKEIATECIDIYAPLADRLGISWLKDELEDLSLKS LNREIFD  
QIKDIVNARKEERQEFLKVKVTEKILSSAAKENIEVEVSARAKHFYSIYQKMRKRGKSAEE  
LYDLLGIRLICRSVND CYSLLGLVHRLWKPIDGRFKDYIAMPKSNGYQSLHTTVIAYGGQ  
LLEIQIR TREMHLVAEYGVASHWLYKKGSTAELPRLEDPIVNKLKQWNQFIIEGESYLE  
EIKRELLRDSIFVFTPKGDVIELPAGATPIDFAFAIHTDVG AHCLGAKVNGSIASLDSEL  
KNTQIVEVITSPNAKPNINWLKIAHTSKARSKIRQLLVQTGQAV AIDKHIVAARKGEKTL  
PETGQARPHAHERPSEAPHA KSEEFPSVVEFHSMQ PGLVLRSEKAGVSVGGIRNMMIRIA  
GCCRPVTGDRIVGYVSRGRGII VHREDCRSLASIA DFEERRIDVKWEDEAMNATARYRVT  
TKKTFDIFSEIESTVRKCSGRLKEGKLG ERGDGTL SGFFILEVDARDDLKRVAKALRTL P  
SILSIEEEAL\*

>SPBIB\_v1\_390001|ID:27164187| exported protein of unknown function [Uncultured spirochete bib]  
VRQNQIYSIAIFLLISILAILPVAAEPQLKTLGNGMTVLLNPIESEENVAILLAYHAGAD  
AQTAQTAGLFLKLELALFNGPAASPGTTEPAA AIDVLEPNRIAGGASLDRFEFGFSVSKE  
KLV PALDTILYLF SQRREFLLAQEDGVENARQSARALIKDSTLDSNAIHDMAIAKKLFS  
RAPFRLDV LGADYVLEKADAATLRTFAATWL VPNNAFIAIAGNFDTDQIMNLLDERFGQL  
PKASNPWSAPLA AFPKPGVTRPLFLVFPDSTMPSGMMQVELRYRGPDPKETSSFAALRML  
EELANTPSSRFFTAIRKGM PKGAEPKEVRIAYSPNRNASWLSIIASIP LPSGKKPTDIVF  
SFKELARGTELYMIKSNPAYFSAAEYQSARQALLEKTMAIQGDPLDAAAHAAALWSWGIP  
SFVVFQESDAIMKTGQKELSQA VDTYVQKNLEVVTVRLNPDLYEANKKIFSSNGFETVTAQ  
NAFWWR\*

>SPBIB\_v1\_390002|ID:27164188| protein of unknown function [Uncultured spirochete bib]  
MDYVRYCLASNLRLRRAILQMSQEELAQRADLSPGFANIETGRNFPSSKAILKISAALK  
IEPWKFLDPQKQDLFFTRDEIFQWFEDSRKRLFGYPQNPEEEQKGNRPEDSTSPED\*

>SPBIB\_v1\_390003|ID:27164189| Peptidase M24 [Uncultured spirochete bib]  
MFTSETYIKRRTAFRQSLYDRGILNGTLLLLANSECPRNYPSNCYPFRQDSTWKYLVGLD  
VPGIAFTLDIDSGHSCIYADDPGIDSIIWTGGTPTRSQLASQAACDEAASFSTLSALLAR  
ERA AKKPVFIFPPYRAEQVSALVALLGLPDASPADFLKEHINTSVIAALVSLREIKEPEE  
IAEIERAVTITKAIHEDILHNFRAGWTEKQAANRVL SLASEYGC ELAFATIATCKGAVLH  
NAPTAYAATSNDTFLLDAGVEMPSGYAGDLTTTFVGERFDVQSREIYEVLSRVFNEAIS  
VLGPGVRFIDVHKRASVALAQGLTSLGIMKGDPEKAVQAGAHALFFPHGLGHQIGLDVHD  
MEGLGEDIVGYGDELGRSDQFGLHALRLAKTLKPGMVHVSVEPGIYFISELIERWRAQGIC  
KDYIEYDNINKWMHVGGMRIEDWCITESGARRLGPEFDK KVA AIEAARSGK\*

>SPBIB\_v1\_390004|ID:27164190| protein of unknown function [Uncultured spirochete bib]  
MKEVFACAFLEDAIVVKSMLESAGIQAELLS DQMLDINPFYSIEPKGAKIVVSDSDEADA  
KVIVDSFREHTRS DN\*

>SPBIB\_v1\_390005|ID:27164191| putative Metal dependent phosphohydrolase [Uncultured spirochete bib]  
MKKKLLIPSIIVLLTAF AVAGVFLLMQLYIADKSFDTLDRALKSLIDLQASAA YNGYFAW

TKMYDLVMQGNLTEANALADEIPKSFPLVASAEIMQGVPEENFVVGADGELLRIVYSIR  
DDDEFRTAPNAVAVTIIQASKLLDIVSPNGFKIDMTGGRKTTYGIHVSNLMHISLWNII  
AMVLLTILFASLLIQRVYVKKTAFFLDTRGLESIIYLFQEKMSSHRSRNVAVLALFLGK  
KLGRLGKCLRNLVVAALLHDIGKIGVPTNVIKAGRLDSKEYMQIKQHPVISARILKSFK  
EFERLSPIVLYHHEREDGSGYPEGLTGKDIPLESKIIAVVDVFEALVGERPYRNPIHPFS  
AFEKLLKMPDQRIKVLIDNYSELNSFQPPRWVLSYSPWLLGV\*

>SPBIB\_v1\_390006|ID:27164192| conserved protein of unknown function [Uncultured spirochete bib]  
MREIYRQLADAGILFFEYGVTAALDAYYDEKPRPVRFVVAECSVIDLARCFSELQYPNLPY  
ADAAFDTCESLALRTSFAESGGAPAGAIQESSMQESSVRFLCTEDALHCEVGGSWANFR  
RNPQSDIFYDQGNYYDDLKAKAIPSCNTDTDNALFESAALATFHPEGYRLAKEPIPLPAC  
TSSYFQKDLLITVLTGPYPAAGLELLKKSFGIAREWPEIALLDDVDHAKDYHPEGNGWNH  
TLQTFYSYRKERDLVLSLALLHDIGKPESLSREGKRFDQHAELGARRARKFLARLGFSTT  
TQEDVAFLIRYHMMPAALSVLPIQKTEPVITDPRFPALLELFRCDFESSYKDPEGYYEAC  
NAYQTIRRNMKNPYRNADGSLKSRSKRTIAHY\*

>SPBIB\_v1\_390007|ID:27164193| protein of unknown function [Uncultured spirochete bib]  
MMQVDVEAFWANFEKEIGEKIISRTMGQHFSTRKSQGEWGLLVLSETALRFRPTPGENWF  
DSLFRMAAPRVKPEPLADILVPLESIASIELPKKHFFDFLFSPPFTVFTLRIRIGNTEHD  
LLGADSKCELFRWLLSNLPVAKGT\*

>SPBIB\_v1\_390008|ID:27164194| conserved membrane protein of unknown function [Uncultured spirochete bib]  
MSRTLEREAGKCYSPAMSRARGIAAGIGYSTIFGFSFLVTKETLAVLSPVELLASRFFIA  
ALLMSGLALAGAIRIDFRQKPLGLLLMCLFQPVAYFIFETYGVANAATSVAGIILGALP  
AGVAIVGAIVLKERLSALQYSGLAMSIIGVGLVALLGQQNAETKPIGVVFLTASMLSAV  
IFNIASRKASERFSPAERTFAMMWSGAISFGIPAALQNIAGKGNIAALFNTAGSRFVPSW  
AGILYLGVLSSVLAFFLINYSLTYLKASQSAVFTNMVTVITVLAGVLIRHEAFSWNQGLS  
ALLIVIGIAVANSAGKREIQERS\*

>SPBIB\_v1\_390009|ID:27164195| Amidohydrolase 2 [Uncultured spirochete bib]  
MKNAAFYDVHCHLMNLSHPAFVSIIESLRHRPREVIYSQIASFEYLASSMLKRGGEKVRN  
LLAVMDNDCADILFLMEDDLAQFEDAKNAKFKEPAPLREGSLHIGELSFDSLVTPLVM  
DFSTPSTLTPDITYYKRPPRKPIEAQIVDIMYAIRRYRADRPQGFLRVYPFLGLNNTKNYRA  
EGLLAYLEKWFAGYKKDESEFERRFMSMSANAPDCTPESYGLFAGIKLYPPLGFDPPWDD  
PAEREKVEILYSFAESKGPITTHCDDQGYRIIPLESLLFTAPARYKPALEKYPNLVLN  
FAHFGKRYIRMIGGRAQEDWRAQIVDLVLAYPHVYTDFTAGEPSFYGELANLLDSLSQ  
NEAEKLSHRILFGSDFMVNLFKVRSDYRDYELFSQSGLAEMKLRFCSENPRVFLFGSGE  
\*

>SPBIB\_v1\_390010|ID:27164196| Aminotransferase class I and II [Uncultured spirochete bib]  
MFEFGLERFFAEHEFNARYLLCTSDCESMPISTLLELSDNPGHALES�TKTWLGYTESR  
GSPILREKIAKLYKGLEAKSILVHSGAEEAILNLYMATIQPGDTVIVNWPCYQSLHEIPK  
SLGAHVIKWEIQRSPARWFFDPVELEQLIESAEGPDRRHGPGASFGFGSGPSPSLNARTN  
SGSARKFSPGPNPTTHVKMVVLNMPHNPTGALMTQEEFSRVVEICAKRGITLLVDEVYRL  
LELDGREPLPAACEVYENASLSVLSKAWGLAGLRIGWLATHRSDILDRVAAVKDYNISIC  
ASAPSETLACIALDNSEKILARNKAICQSNLAHYRAFFDQHVELFSWIPPQGGSVAFPRL  
SATAENAPWNEADKLAHEL VNDTGALILPGSLYGEYAAHFRIGLGRAAIPQGLDVFSKW  
LENRRKI\*

>SPBIB\_v1\_390011|ID:27164197| putative tRNA threonylcarbamoyladenosine dehydratase [Uncultured spirochete bib]  
MSAMAMESPARFTDRTRIIVGENGLDALAKARVAVYGLGGVGAACALDLVRAGIGYLHVI  
DFDIVEISNLNRLAIGFSRFVGMPPKTEAFMQAAREINTDIEILAEKTFFTSETATKVIAR  
ECEIHADCVDLLSPKVSLLAAMRTQNLVFISSMGTAGRLMPERLKGMLMSEVKGCP LARA  
VRQRLAKLQIPLDFPVVWSDEPAIKPMPREGQRGIQGSAPFVPQAAGHFMASWIVRKILE  
DTHV\*

>SPBIB\_v1\_390012|ID:27164198| putative Hydrolase, TatD family [Uncultured spirochete bib]  
MYCDAHIHLVDLDSREPGFARRPLFPWRRAAVVSHDPDEFAASEKMQALLSPTIAGFGVH  
PQNPDMRNADFLAALCREKKIRFIGEAGDFDFGDGPLRSRTPEAMKLQTEAFVFQARLAA  
FEGLPLVIHLRKAADVLMAGHGRILADIPSVIFHCWPGRLEEANMLLKKGINAYFSFGTPL

LRDSSHAIESLIGLPLSRILSETDAPWQPPHGS AWTRLEDIATVVRKMSMVLKIEQSALE  
SILEANFASAYLLNE\*

>SPBIB\_v1\_390013|ID:27164199| protein of unknown function [Uncultured spirochete bib]  
METILMDVRRFMRSILDLA HARSDVQVGSGRKADTHSKSASYRSIDTGS SVDVYGCGRGI  
DIYSGKEAFEFYKKMSFDKMPPL\*

>SPBIB\_v1\_390014|ID:27164200| Transcriptional regulator, PadR-like family [Uncultured spirochete bib]  
MSAAEELYEKWKSQFRKGFLELCVLELLSKSGRSYGLAIMEQLNAGVDVTEGTLYPLLM  
RMTKDESIEAQWETPDVGHPRKYVISSTGSALLGQMREEYERSAAARRTIMTGGHAE\*

>SPBIB\_v1\_390015|ID:27164201| protein of unknown function [Uncultured spirochete bib]  
MTRKEYIDILTQRLGGLDEASCADIILEIEDHIDGLVREHPEKSPEEIEGLEPPESLAD  
SLREAAGLGPYEPHAEQPKSGQKAKKNVHITIDDIELEEAIKAFDIARIFRRNRDGT  
KESQESQTS EDVHGSYEFGSDLASVHEVSVRCRSSDIRVLVADTSLAVRTPGEEHPRLE  
LRYDSTRGTFGISTAHGKSEPD LIELRIPSTVDSLLVSTISGDVQVLD RIGLSIKTASG  
DVDVAACAGDIEVRTASGDVSLAQCQENITVTTASGSVSIEADELCNAIEVSSASGDVLL  
YYPELWDARVAVSTISGDIEHNGNATGRGTIVFGSGLAPVRITTVSGDISVRQMR\*

>SPBIB\_v1\_390016|ID:27164202|cat| 4-hydroxybutyrate coenzyme A transferase [Uncultured spirochete bib]  
MNLQDEYR TKLISIPEAVSKIKSDDNVVAMCASEPQGCMGQFHTVADRVENVRVFSCLT  
LQPYDFYMKPEMKGHFELASWFHAPGSRAALKNNTGTVTYVPNMLHRSATDFIFARKPHI  
FYGTCTPPDKHGYVSLSLGITYEKDILEAADLVILEVNPLLPRTFGDTHLHISEVDFEVE  
HEQIVPELSPQPSETDLTIGRYIGELVEDGSTIQLGIGGIPNAAALALRDKKDLGVHTE  
MIVDSMMELYEMGVITNRKKS FHKGKLVATFAMGSRKLYDWLDDNVAVEFMRGRWVNNPA  
VVSQNSKMVSINTCLMVDLTGQVASESLGPVQYSGTGGQSDTAEGAVEGIDGKKGKSIAC  
YSTAKGGKVSTIVPVLPEGTA VTLHRSLVDNVVTEFGIARLRGKTVRERARELIAVAHPD  
FRAELTEKAKALGYL\*

>SPBIB\_v1\_390017|ID:27164203| 3-oxoacyl-[acyl-carrier-protein] synthase, KASIII [Uncultured spirochete bib]  
MAKAAIIGTGLYAPGQPIDNETLKKLTGVEFDSQRHEEKLGIKSRHARLSGLKETTADF  
AEHAARDALQAAKVDPKDVGLFIVATDTPEYISPATSILLOGRLQGGETGAKSFDVGASC  
ASFIEALDAAARHLITDSSMRYALVVG VYNMPAYIRDGDAFGWSIFADGAGAVVLERQEQ  
GQSGYIDGAFVTDGTQWNFVGVYAGGTKLPVTRERLDSGEYGLQLLQKLPGDRNVKLWPP  
LVQRLLKAKIPQTA VSHYLFTQINKSVIEQVMAVLGEPLHKTTMVM DRYGYTGSGCIPM  
ALHEAVMAGRIKKGDLVVMVASGAGLAVGASLLKF\*

>SPBIB\_v1\_390018|ID:27164204| putative Transcriptional regulator [Uncultured spirochete bib]  
MGSDTRKALIESAASLFSARWYGIVSVAEICRSANLSNGAFYRHFKNKEEIFCAILDYVV  
GQIESALAPLAQIEPNDR LRQFVRIIYDFSQNNTPLV RVVFREGQYRLF EYERKLKDVYEK  
AFAVVFDRKPSTAEYLFALGGLRFASIRRAFHQIPVQPEAIVSILHSGILKEQPINADRV  
FSTSITPLPIELLPSREQLLA EGRKLFGEKGYFETNIHEVASNAGLAIGSFYRYFESKE  
AFYKEIIQSVGRDVRHFITLNLGNGLNRLERELRGLWLFILFLSM DRYCYNIVREAEFVL  
PEEVRSYDAFHRYLKR EDSTITCDTTTCIEFMLGVAHYL GIEVIFDKSPDNARQVIEE  
IGYLYTHGLSGDERLHNARN\*

>SPBIB\_v1\_390019|ID:27164205| Beta-ketoacyl-acyl-carrier-protein synthase III [Uncultured spirochete bib]  
MHVGIAGIGLYIPEHQMTASDLAKATSVPEDVIALKFGIKTKPIAGQEEPTSYMGFMAAQ  
AALEDA AIPAEDVDLVIWCGAQHKDYPCWLAGLNVANRLGAIRAWSFDMEAMCGSMMAAI  
DVAKSLMLARDDLNTVLLVSGYRNNDLIDLSYPPTRFMMDIGSAGSACVLRKNLGRNVVL  
ASAFKGDGSLSEMCVVPVLGSKAWPPKPEDAQHASFIVPDEQVFKQKLGEVTMPNFYAVI  
RESLKRSGLSERDIDYLAILHFKRSAHLAVLQELGLRENQSTYLEDYGH LGQNDQLLSIK  
LGLETRKIRDGSRIVMVGAGLGFVWASTVVVWGPVAADHA\*

>SPBIB\_v1\_390020|ID:27164206| Leucine-, isoleucine-, valine-, threonine-, and alanine-binding protein [Uncultured spirochete bib]

MKRMMLVLA VLVLFAGSAFAQGTTKLEGTIKLGGIWT LADITGKQGSAAAQLAVDEINAA  
GGVLGKKLELIVVDDEGKADKAAA AVEKLATVDKVDV FVGGMASGAELGKIPAFKKYGV  
VMSTGAAGSATVEKALGPSPE SDFYFHLHPWDYNQGAS YAEGWDAIQKKYPQIQIKKIFL  
AYEEGAFGKSSWDATKVLFGSDKRYTIDGASFKS ALLGGGDYTA VLEAAKAFKPD LFIWA  
GYDADALPMLQAKAMKFSPIYLGAPPGWPIGFGSSKLARNVMLYGMWSPAINDINPVS  
AKFYKNYIAKYREEPATYFAPLAYS AVYIVAEGIKAAGTTETGPLVKALEQTKYVSPLGE

VITFKPSNIIKHQGITRQKILQWQNGIQEVIWPFETATAEPVYPPFAWK\*

>SPBIB\_v1\_390021|ID:27164207| High-affinity branched-chain amino acid transport system permease protein LivH [Uncultured spirochete bib]

MGPSLRRLNLNIQAVKMAIKQRKAIIFAI SIATAVVLILWKPTVLIYGLQAAGLYAAVAI  
PMGLVVLGIVHIVNLSHGFMMLASYATYTVCRALGVDPLIALIPAALVTALFGWVVFQLT  
IRRALKAPELNQLILTFGLAIAFSQIINLIFTSQTYKLSLEYSSMSLDIGDLSFGVWSFV  
FVAVAVIYAVGLQMFLTKTRTGKAALAVGQNPKGAAIVGIDVYRTYGLVFALAIGLVGAM  
GALFLTKSAIFPGVGSPTMKSFSLVAMAGIGNIPGILGASVLLGLAENFLRSFRGTRDW  
AEIVYFVLIIVILSRSLKGGKS\*

>SPBIB\_v1\_390022|ID:27164208| Inner-membrane translocator [Uncultured spirochete bib]

MNRTLVRILLILIAVAVALPAFAGDYPLQVARNIMLYMALAISWDMLLRSGQISFGIAG  
LFGIGAYAAILGVVRAGMPTWLSIPFAAVFAALVAFLIGFVILRLRAMYFSIVTLALGEI  
FRIIVHNLHDFTGGPEGVVMQQGVMFGGNASKLYWLVLAGLLVAIAASYWFEKSRIHFAL  
TAIRNNEISAKSSGVDIFRWLLAFVVTSAIQGMLGGIFVMSYGFAAPDVVFSADFTLLP  
LAMALLGGVYSTRGPIFGAILLGLVAEWLKLKIPYGHLLVYVYGMIIIIVILFMPQGLKNLL  
KPAAKRAEGRSA\*

>SPBIB\_v1\_390023|ID:27164209| Branched-chain amino acid transport ATP-binding protein LivG [Uncultured spirochete bib]

MIKLRTTNLTKRFMGLVAVNNVSFSMEEGEILGIIGPNGAGKTTFINLISGIIMPSEGRI  
EYKGDITWMPAHERARIGIARTYQLIHPLENLTIENVMVGSIFARGHSLKEGRRRAEN  
LCHELGLTDLERDTSRLTILEVKKMEIARALANEPEVLFLDEVMAGLNSDETKELIAMVQ  
KIAREKNLAVGVVEHVMGVIRELTHRIVVLEAGELIAEGKYEEVSRNPRVIEAYLGGGAA  
\*

>SPBIB\_v1\_390024|ID:27164210|livF| leucine/isoleucine/valine transporter subunit ; ATP-binding component of ABC superfamily [Uncultured spirochete bib]

MLKIQGLECGYGRMKVLEGINFEVGAESVGLFGPNGAGKTTLISAVMGMIKPWKGSIELE  
GVRIGGAETFTIARMGVALVPQERELFPGMSVEDNLMLGAAAYIPHAKDDIPNQLEKVFEL  
FPILKERRTQYAGTMSGGQQRMLAIGRALMSKPRLLILDEPSLGLQPSIVAEVFEVLKSL  
KSSISILVTEQNVRESLKAIDRGYVLENGRIVLEDSAEGLKTNPVVKSYLGL\*

>SPBIB\_v1\_390025|ID:27164211| putative hydrolase [Uncultured spirochete bib]

MASGFVAVNGIKLAYELSGTRGVGSADAPLVLLNGIAMSISHWKPLIAALPEGTRCLCHD  
FRGQTLSEKPAGPYSLVMHADDLAALMDALHIERGHIVGTSYGSEVAMEFAIRYPERCAS  
LVVIDGVSELDPVLDAAVVSWMETARTDARLFYKTMLPWTYSSGYIAAQKAILAAREEAV  
AKLPPEWFKAFVELCKAFLDIDITPRLGAIACPTTVLVGEKDILKHKGFSEIARNIPGA  
MLHVIPDAGHAVVIEQPAVVAEEIWQAVS\*

>SPBIB\_v1\_390026|ID:27164212| Putative hydrolase or acyltransferase of alpha/beta superfamily (fragment) [Uncultured spirochete bib]

MASGFVVVNAIAMFFVEAGVATTAGAVSMAGAAAMAGAPSGAGADPWVGVVYVHGNTG  
SSIWFSLVMNVPGCHVVAFDMPNFGQSSPLEGDISIQRYAAYVAGFMDAKGLKGAVVVGH  
SLGGCVVQALALERPDLVKAMVLVDGAPNGLITPKDRHPAIELMRTNRAVLEQALRAVV  
PTLKNDELFKAIVDDAQKMAQPAWIGNAEALSHFDITARCAEYKGPVLVIRGALDPIITA  
DMAETTAKAYPGARLVTLLEGVGHVIVEQPDTFVRLLGDFVGEHV TAR\*

>SPBIB\_v1\_390027|ID:27164213| 3-ketoacyl-CoA thiolase [Uncultured spirochete bib]

MSKVSIVGAYNTQFGSFVKKNKETGEVTDLKSIYDLMLEAGRGAIADAAIEAKDIDGVVW  
GSFAPGLFANQEHLAAFATEIAPDALRFKPMYRCEDACASGSAAIYNALYALEAGRANIA  
LVLGVEKMSLLDTKGTTKALAAASYWAEAGAKGYTFPGLFAEYAKGYAAHYSLDPATFSK  
MLATVAALCYKNGIDNPLAHFGKGGPADRLGLTTAQAILDLPPEKNPMIAEPLRLHDCSL  
ITDGA AAIVLVRDDTSLAKSDRAVKLAGFGHVNERIPISVRPNLYQLMAGKEAVRQAF AE  
AGITARDVDLAEVHDCFTITQLLITEALGLSKDGQAGYDYMAGRFRDQCAVNLSGGL  
KAKGHPVGATGVSMHALVYKQLIGEPIGAILTKKRPTVGVTFNVGGSGVTNSVSVLSR\*

>SPBIB\_v1\_390028|ID:27164214| conserved membrane protein of unknown function [Uncultured spirochete bib]

MNIGDFLKRNTMAMVVMVILVGLGEKMAERFLPLYILAIGGSTWVVGGLNAMDNLLSA  
LYSLPGGYAADKIGFKRSLFLFTALAMGGYLIVILFRSWQAVLVGAVFFISWTA VSLPAV  
MSLVSKAVPKERRALGVSIHSFFRRIPMALGPIIGLLIGAYGTKNGVLVAFGA AFIMAG



FSLFLIQRYSMDNDAGEGKDRGSQKIPFKDMFNPALRSLASDILIRFAEQIPYAFVVVWA  
VNSNGLTALQFGVLTTIEMVTAMLVYIPVANLSDKYGKKRFVLITFGFFTAFPVLLFSH  
SFPMFVVAFIIRGLKEFGEPTRKALIMDLAPEAAKARTFGLYYLIRDVIVSIAALSSAAL  
WNIAPAVNFLVAAGFGVAGIIVFAIFGKDLTMVSAQKAPASK\*

>SPBIB\_v1\_390029|ID:27164215| protein of unknown function [Uncultured spirochete bib]  
VQLVQHVFVQALTGIRAFSLRCTLSETMRRTWEKRWKTPGKTKAEYIPKYALA\*

>SPBIB\_v1\_400001|ID:27164216| Long-chain-fatty-acid--CoA ligase [Uncultured spirochete bib]  
MFLGHTPSGAPPISFPPHSRLLNAGWPNGYGRAAHSSSKEKCHKNIKPLLQERKDDI  
SRVQALCLFSMELMCSIYDMRETEPWKFLDAYRGRVFTGKWPTLPQLFDIVTERFPDRP  
CFTVYSPERVSLTYKEAQA VTKVAAYLHSGIAKGSVAVTGKNAPEWAVAYLAVLYAG  
AVVVPIDYQLPTREILALIKAGDVSAAFIDEEEKFEEMQKELSTMPCFSLAKGTRNYIYDL  
APPSGTKFEPPVPGQSLAAILFTSGTTGIPKGVMLSHENFVSDCFLAQSNLNISETDVF  
YALLPIHHSYTMLAVFIESLSVGAETVFGKMMVVKQILSDLKQAKVTMFLGVPMLFNKLL  
SGIMKGIKEKGAVAYALIRTLMAISGFIKKAFGVNP GKKIFHSVLEKASLSSIRICISGG  
GPLDPQVFRQYNQLGIDFVQGYGLTETSPILTLNPVEHYKETS VGKVIPGAEIRIDNPNE  
EGIGEIVVRGPMVMQGYKMP EETA EVLSE DGWLRTGDLGKLD DENYL YLAGRIKNLIVT  
EGGKNVYPEEIE NEFQLYDEIEQILVRGYIPEGKSV AEEIEALVYPNQDWAAQNKL TSEQ  
IEAQIQEIIAEVNQRLRPYQKITRIQLLNEPLEMTT TTKLKRQTS GSASNLVPELK\*

>SPBIB\_v1\_400002|ID:27164217|valS| Valine--tRNA ligase [Uncultured spirochete bib]  
MKSVELPKAYDPKTFERRVYEMWKTEGHFQPKVDRKRPF TIVIPPNVTGVLHMGHALN  
NSLQDIQIRYRRMKGIPTLWLPGTDHAGIATQNVVERKLRKEGRERTQIGREAFIEETWK  
VAKEHRAFINNQLERIGASVDWSRERFTLDEGLSKAVREVFV TLYERNLVYRGEYLVNWC  
PSCGTALSDDEVEHEDEPGSLWHIYVELVDGTPPEWPSGRIE IATSRPETLLGDTAVAAH  
PNDQRYTALIGK MVRLPLTDRIIPIIADSYVDPEFGTGLVKITPAHDPNDFLVGQRHKL G  
STNILNPDATLSSAVPEKYRGMKVLEARKAVLADLESQGLLKSEEKIVHAVGH CYRCHTA  
IEPYLSRQWFVRMKPLAEKALKAWQDGDVFFPKKWEHTYEHWLENIRDWCISRQLWWGH  
RIPVIFYCKDCGATMVSREDPVVCTQCGSSNIYQDEDVLD TWFSSWLWPFSTLGWPKDTAD  
LRYFYPTSALVTA YDIIFFWVARMIMAGMEFTGQSPFKEVYI HGLIRDKQGRKMSKSLGN  
GIDPLEIVDEYGS DALKFTLAYNCAGGQDILLDRDSFKMGSKFANKIWNASRYILMNLEG  
RTYLP ESEIVYNDTDRWILHRLNLA AKNVSQALESWRFNDAAQTAYS YFWDDFCDWYIEA  
SKLSTKSSDEHEKDRATTVLLNMLDASLRLHPFLPFVTEEIYSMLPNANGKLISARYPE  
WTAERDAPETE AHFVALKEIVTLVRTLRSEFQIPPEAAIPLNLVFDANFLHAKFITENIA  
LISLLAGASSV SIGAPPSGSISLAGNGVTAQVQVRGLLDISKLIERLSKEKEKEKAYIS  
KLEAKLSNPAFLSSAPADII EKEKEKLAASASKAAKLEMYIRELS\*

>SPBIB\_v1\_400003|ID:27164218| conserved protein of unknown function [Uncultured spirochete bib]  
MNSGENGPQDTGPN GSKSPA AESSQDAESPQDAKSPLSRQGSILRSDRLTMDKAAMLRLK  
RMHLAPYIQLATCLIGKLR RSGGNMFRHQLDTMAILMDYGYIDS VLLKASLIHDLLEDAP  
ETDPDTILSIDDESVDVYKLVLEVTRRPVENKAEFLNRIRDFGSLRAKVLKSADRISNMI  
SLGYVTDDV FVRRYTDETEQFVFP IADERMLSELKELVATRREYLRNRIE I\*

>SPBIB\_v1\_400004|ID:27164219|deoC| Deoxyribose-phosphate aldolase [Uncultured spirochete bib]  
MNRKWKAEIAAAIDHTLLKATATSEQIRTLCAEAKEYTFKSV CVNPCWVPLCASELAGS  
GVLIATVVGFP LGANSTAIKVEEARRAVAEGAREIDMVINIGKAKAGDWN AVRDEIAAVV  
HASKPAIVKTI IETCYLTQDEKIAACRAAVAAGAAFVKTSTGFGTGGATIEDVRLMKETV  
GDAAQVKASGGIKTYEDAVAMLEAGATRIGASAGVTIMKEAEA\*

>SPBIB\_v1\_400005|ID:27164220| Uncharacterized ABC transporter permease protein YufQ (fragment) [Uncultured spirochete bib]

MFFKEIYPTFYIAIAMVFITWV VYKTPLGLMRACGEHPQAAASMGINVA KMRYFGVLV  
SGALGGLGGAVMVL TADIQYTLVSIHGTGFISLASLVFGKWNPF GVLGAGLFFGFSTALS  
FYAKDIKFLAGLPGEFFYILPYLLTIIALLFFAGKSVGPKAAGEIYDSGKR\*

>SPBIB\_v1\_400006|ID:27164221|ams| Amylosucrase [Uncultured spirochete bib]  
MQQGFDTFKKEFSARLSARGLPRYSGWPEFSARLEDELERLTGLLFELYGDRPDFAYWVE  
NIVLGAFEAYRKRPTWLKARDREYPPESGWYLREDVIGAVCYVDRWAGTFRGIEERLPYL  
KELGIKYLHLM PFFKSPERENDGGYAVSSYRETNPALGTIDELSALARKLARHSIALIAD  
FVFNHTSDEHEWALAAKAGDEFYRDFYLTFPNWKEPEEYSKTLREIFPEARREGSFTWNEE

MQRVWVWTTFHYSQWDLNVRNPVFEAMAGEMLALANQGVAGLRLDAVAFIWKEKGTPCEN  
LPQAHTIIRAFQCVARLACPSLVFKSEAIVHPDQIVQYIDLRECQLSYNPLLMAELWEAA  
ATKEVRLLAYSIIKRRHNLPEGCAWVNYIRCHDDIGWTFADEDAALGIKGFDRHQFLNRF  
YLGEFPGSFARGLSFQYNPVTHDMRICGTAASLAGIERDMRRDPGKNRETALRRFLLLYG  
IAFSAGGIPLIYLGDELGMENDPDWDKDPHTKDSRWVHRPVWQEVLFRRERHNPATVTGQ  
VFASIKKMIEQRSKHSVFVAVQGIEVLESQHPSVLLFRKKSSETLVVVGNFSECEATVPR  
EVCARAFEGRLAVDLLASGAAAGEGASVGPLTLKSCELKWLLIEG\*

>SPBIB\_v1\_400007|ID:27164222| GGDEF domain protein [Uncultured spirochete bib]

MIRFSRRIFTDLAIYMMGFVIGVVPFFMTLLGVPASYTMQLWFFIVCIIAGLIVGAM  
NILLARSVVGSRLHLIANKMKQIGGYISSKTHEEIVTTCSPQECMVEKDSDELGECAES  
YNQLINALYASFQQETMVKSFSQLLSSRLELDDLAASVLPMSLEHTGAEAGALLVEENDE  
LRPAASFRINGVETLKDREFIKRVAQEKKRITIELPENIAVEGALLTFRPASIILEPIVY  
HDVVLAIMLLAFIREPGEEAQRITIDLISPNSVAIRNSLSYDQLQRLAANDSLTGLFNRR  
FGMARLQEEFGRAVRNSAPIGVCIFDLDFHKLVDNTYGHQVGDKVLVFLSKIIRSALREG  
DIAMRYGGEEFMTILPGASMTDAYQIAERIRRMVEESEFQYGPQRIRLTISGGATSWPDF  
DASSADALVKRADESLYAAKEAGRNRVTVL\*

>SPBIB\_v1\_400008|ID:27164223| Cyclic nucleotide-binding protein [Uncultured spirochete bib]

MIDVNALQKYSLFGGVSPEQIEKIKPLLGTAFHEAGECPQIEGQPSDKIYFILSGEVEIV  
KQGLVIARLKEGETFGEMELLDIMPISIATVRAATPLEVVTISNRALYEISKLDLKTFSMM  
IMNLARDLSRRLRRMDELACLDSDNDILKK\*

>SPBIB\_v1\_400009|ID:27164224| Extracellular solute-binding protein family 1 [Uncultured spirochete bib]

MLKRNNVLVLLFAILAFVSAQTVTITYWQYYYESKVKLMDELIQKFQAANPGIKVEQV  
TFPYESYNQKVAASIPAGEGPDIIINLFYGWLPTYVVKAGYLAELPASDFNKAYFDKNFYPF  
VAESVQFGGKYYSVPTAVRTLSLFWNKKLFDKADGLDNPPTPKTLEELEAYSKKLSKYDAQ  
GNLIQAGLAMQPTGQGHNWIREILFRQFGNTPYSSDYRKVTYADANGVAAFKWYTDRTK  
DKVGYPNFATDDVTAFKSGKAAMNIDGSFRIATLKA VKDLEWGV AELPAYKGIKS NYASF  
WTHGIVAGTSGKKLDAAIKFLKYITSPEVQELWLEKVGELPANPGLSEKYKNDPVISPFL  
KGLAYAHATAFVDEAGQRTVLVDAVDEVVLKKVDPVAVALKNAAAKEQALIDDFWKQ\*

>SPBIB\_v1\_400010|ID:27164225| Binding-protein-dependent transport systems inner membrane component (fragment) [Uncultured spirochete bib]

MTLATKRALTAYLFLALPLVFFLCVRLGPMVYMLVMSFTNWGLLRKTVKFIGFENYIILF  
NDPVFLQALGNTRYAVFGAPIVILSLIALLLDSIPKGGKGLFRLIYVLPYITPVVAVS  
WVWRWMYQPPPLGIINGILGILGLPAGEFLNSPTQALPSILAVNV\*

>SPBIB\_v1\_400011|ID:27164226| putative ABC transporter permease protein YesP (fragment) [Uncultured spirochete bib]

MGYCTTIFLAGLQTIKEMSEAARIDGANDQQVLRITLPLLMPITFFLMVMEGIQFLRI  
FTQVYNMSMQAMGGPLNSTKSAALYIYQKAFTNFEMARAASASVVLFLIIMVVTVLQVRF  
FDKRVNY\*

>SPBIB\_v1\_400012|ID:27164227| Binding-protein-dependent transport systems inner membrane component (fragment) [Uncultured spirochete bib]

MKHRNQMQRWGKVLPA YFILLFLSIIMLFPFVWMLSSSLKDVTQIYRLKLFPERPTLENY  
RYILFSASTKFPQWFLNSVIVAICTTASVLFVFDL VGYTLAKFRFPKIVFFLIISTLM  
IPTEMLVIPWYAMARALKWVNTYWGIMFPGMISAFGVFLMRQFMSTIPDDLIDAA\*

>SPBIB\_v1\_400013|ID:27164228| transposase [Uncultured spirochete bib]

METALSELPDDVESLKKLVVEKARRAHELEATSKQLKEENAALQLKLEVTDKYETLQQK  
FFGSSSEKRRKEDDNPQALLFNEAETYAEAPPKPEKSIPVKSHERKVRGRKPLPANLER  
REFVYELSEAERTCPSGAVRPEIGQEVREELEFIPARFVNAHILKKGPCQCASC SHP  
IVQAEPAKLIPGSSFNNTTIAFFLTSKFVDSQPFYRMEGILSRWGIDTSRASLCKVAVS  
AGRAIGELLDELRKDLAASPVLQMDETVVQVLHEKNRSAQAKSYMWVARGY AEGKPVVFF  
HYHPSRAKEIVQKFLHGYHGFVQTDGYAGYNEVGFSPGITHVGCLAHVRRKFFEAEQQGS  
TEASAFLERIAEL YHA EKLVRKKFE EGVLTTEEFLAARTKEQGPRLSEMKA WLI AKQGS  
PPSLSFGKAVHYALGQWDRIEKYLQHELLTPDNNAVENAIRPFVIGRKNWLF SNTPLGAH  
ASAGIYSMIETAKANGHEPYKYL CYLFNALPKARSLEEK RALLPYKLAPNSY\*

>SPBIB\_v1\_400014|ID:27164229| conserved protein of unknown function [Uncultured spirochete bib]

MYFKKDRAIHLVAGVTDMRKQINGLAQIANEKKSDRVFSGDYFIFLGKTHKVMKVL YWDR  
TGFCLWVKRLEEETFPWTRKQKGIITLKREKLKLLKGDIFREHTEKRYVSVL\*

>SPBIB\_v1\_400015|ID:27164230| Amidohydrolase 2 [Uncultured spirochete bib]

MRVIDSHVHFPENWIIDNGDPFEVSAPGKGTGYTSGRTKSSPSDAAKPAANKHAQWMENE  
KARWESAWQFPAPEEISLEEGERWSNECSR YDFLKA VVFTAGSNQFAS ELVARHPNQF  
RAYAHDPMLSDAAERLEKALTEQHLCGYKILGPKVDTPLSDKRFDPIWEVAQSHEIPVL  
IHFGIMGAAGGIASHVNINPLAIHDVAKRFPDMPIIVPHFGTG YLFETLNL CWACPNVYI  
DTSGSNQWMRWMPFDVTLES LFRKFHETIGASRIIFGTDSSWFPRGFTIDYLKAQNRAMS  
DVG YSEDEKDMVLYRNIVYLLKMEHL\*

>SPBIB\_v1\_400016|ID:27164231| Fumarate lyase [Uncultured spirochete bib]

MADKKFSQVYVENVLDPAYRNWKANFYAASLKVHKAHL CMLYETGIISKDKAKEIAGGIA  
YLEHEFSAPGHIPEGVEDLYFLFEKALGQQIGDENAAWLHTARSRNDMDTTIFRLV LREE  
LAVLIERLQVFSKALLARCLQGENELTVLFTHGQPANPSTTAHYLSSFLMETIGDMKWIV  
QALADVNQSTMGACAITGSGFPVDRQYVSDLLGFENYIPNTYQAVSTSHWL VNAASTIRN  
LMIDIGRFAADLLHKASSEVGLYRFPDDL VQVSSIMPQKRNPVILEHIRIQAEMVAGACD  
AVAHSFLNVPYQDVNENADMIISKLIETIHES TSVIDLLQESVLKMKSDPARAREICRQF  
GVTTELADSLVRIYGIGFRKAHHICA EYVASGYDIQTLRDSFFKETMQALDLSNRIEE  
ILD LGTFIQVRKTPGGPSHEGIKAVYARAEEM LGDMEKNIISVKSKWHRADDALEEFKA  
LIAG\*

>SPBIB\_v1\_400017|ID:27164232| conserved protein of unknown function [Uncultured spirochete bib]

MIEHDTDPDSRLRFIAMDM DGTILDDGYQLSAHVAQTLRALQNKGGKLLIATGRIYASAH  
EFLQGA FE PDG FVCTNGADIYGPNGVRIASHHIPAEAMPALIDASRRHSALVCCYIGDNW  
IYERYSDMVAFYEQRSGMKGIQRSFDSL SGEDILKFLAIGPHEELLAIREKIAQKASRLL  
ETVFSHSTMLEIMAGGVSKRRGLEECLE YFGGTMEETIAFGDAENDLEMLKAVGVGVAMG  
NAHASIQAEVPHVTESVDEDGVARFLERLFGI\*

>SPBIB\_v1\_400018|ID:27164233| Carbohydrate ABC transporter substrate-binding protein, CUT1 family [Uncultured spirochete bib]

MKKALIVLVFALAFASMVSAQTINVLFWDDAYPRTL MERIPEFEKATGIKV NIEILQPPQ  
VFTKTSVSVSKDR TDYDLVCVDEGNIPLFASLMLPYDQWAPGKVFKK VDPNTVTPAMLDV  
AQWDGKLI GLPINGNLYVWMTRKDLIENPKYKADFKAKYGYDLGVPQTFQQMLDEGTYFY  
ENGIVSGGFGPFNGGPAGVFGEAIFMWESY GTHFIEWVKGKPTLVVDKAKAVQGM EFYKK  
LMKISP KGAETMAHVERQA AFAADPKGVFTQFIWPAQIASYEDPKSLVAGKIVYSAPPA  
GPAGRFAIRGTWAVNIPLASKNKDAAEFVYWWASKDIATWLVEKNTVPARTDAL TDPRF  
AKTKPWLA AIADSMKYAAARPRFNEVAQVQDIVK KYWIMGITGQMP CDDAMQKIIDETKD  
VLKKAGY\*

>SPBIB\_v1\_400019|ID:27164234| Carbohydrate ABC transporter membrane protein 1, CUT1 family [Uncultured spirochete bib]

MFSRKPATELPRAQQGAGKARGRAPFLFLAPAIIVVFAVLIFPIIFSLFVSTYNWPLSQG  
AGVRHFVGLGNYAALTQDPEFWNSLKLQLGFIFIAPIELLFGFAAALLNREFFGARVV  
RLLLLLPVFFLPILSGMTWRFMLQPRYGPLNALLLKLGAPEITWLGNPATAYAAIIVQDI  
WRMWPFMFMLLYAALTSIPQELMEAAEIDGAGFWLKL RSLTIPLLTPTILTA VLLRIIDA  
LRVFSEVYVMTEGGPGSATMLFSLYTQRQAFGYQKVG MASAMAIFLLVISIVFAL TLVRK  
NMSLDVLEEKAGA\*

>SPBIB\_v1\_400020|ID:27164235| Carbohydrate ABC transporter membrane protein 2, CUT1 family [Uncultured spirochete bib]

MMKSLKTRKRIILNTIIAIVAFVLAIEL YPIVITVINGFRDINILSGQPFQLKQLT  
LRSYELVLKNAGFRLGMQNSIIVGLLST AISVLIGAMASYGIARFHFKGRNGLAYSFLVF  
RMLPQISLVISLYLMFSAVGLRDTISGITLAHTSFNVPYVIWLLL PFFTAVDKAYEEAAM  
VDGCTRQGVFFKIFLPVAPGLVVA AVFAFLNSWNEFM YALITGVKAKTAPIAINGLLG  
GETLTWGQACAAGTIMLVFVIFITLGMQKFLIRGITTGGVKG\*

>SPBIB\_v1\_400021|ID:27164236|yihQ| alpha-glucosidase [Uncultured spirochete bib]

MPIERISFVKRSDGFSLYADERLVL SHSESAPFLFMGRGEARIAMHHGNFDIEDEIRELY  
PLAQWDL DADGELVRLWSEGGRWAVTIRPEIVEGRLVVHISRAGIVARDSLFEGEVRVRL  
SLPARPAEHVYGCGEQFSYFDLRGRKFP IWTSEQVGRNKSTRVTLEADLADHAGGDYWW

TFFPQPTFVSSDRYWVHMDSSAYSVDFRRTAHEVLCWELPAALVFGQAESMPAVLEDL  
TEYFGRQLLLPEWVYKGVILGIQGGTEVCQKKLDKARAAGVPVAGIWAQDWEGINITSFG  
QRLRWNWVWVWPERYPSLDAAIKAWRTEGVRFLVYANCYVGKGWSLCEEAAAKGYLVKNAQ  
GEDYYVDFGEFDAGIVDLTNPEAFYWYAQALARHIIIEFGASGWMADFGEYLPTDAVLFDG  
TPALLAHNLWPALWARCNNEAVRLAGAEGEVLYFMRAGFTGSQRWCPMMWAGDQNVDWSN  
DDGLPSAVRAALGLAMSGHGLHHSDIGGYTTLFGMRRTKELFMRWAEQAAFSPLMRTHEG  
NRPAENWQFDSDEETLAHLARMGRVHVLLADYLLKACVAENAARGMPVMRPLFLHYPEDEQ  
AWTIDNEYLFGADLLVAPVIVEGARERTVHFPGDVWLDFTWTGEPWESRLAGDLIVKAPM  
GKPPVFRADSPWKDLLRSVSNLVP\*

>SPBIB\_v1\_400022|ID:27164237| putative N-acetylglucosamine-6-phosphate deacetylase [Uncultured spirochete bib]  
MADSHTHEYIIIEGADLVLPDCILPHAALAVREGKIAHIQASGRSADIKKDSAFSGAPV  
LHMPDSYVMPALVEMHIHGCGEWGFEKLAGPTDLVSAAAFLEQKGVGCFVPTLLWDEETV  
ANLALAIERCGLPEYTLPLGLYLEGPFVNKARRGGIHPERIHAPDFVRKIVEAAGGHLK  
IVTLAPELDGIEAVYRIFQEAGALVSLGHSDARLPAKLPAPHPYSITHLFNAMSGVDHKE  
GGLANLAFSGDPDFVELNGDGIHVNATCLRLAARAVSADSLVLISDAVISAGMVHGSYRY  
YGHEVISSERGVRYADTDVLMGSNRLGIDIVRNVEQAQVPLWQAVRAMSLTPRKALGQA  
EEYGSLEVGKFAIFLWDKDLEIPVRPETLLARTDLRAE\*

>SPBIB\_v1\_400023|ID:27164238|alr| Alanine racemase [Uncultured spirochete bib]  
MDHRGTTAWIDLAAIRSNYRQLVKLAGGSVCPVIKADAYGHGALAVAHALEREGAPYLA  
VALAKEALELRESGIQTPLLIFGVPEHSWSSIAIRLGCAQTAYTEEHVIRILASAAKSLGK  
RAKAHIKIDTGMNRQGLSWTKARAFAGLLSDYPEIAVEGIYSHFADADNPDPSFTRLQLG  
RFNEALAAFAEAGIVPKYRHANSALLFHPETRLDMVRPGILLYGLSPAPGIALPEGFA  
PAMTLTTSIVHVREVPAGESISYGRTFSTERRSRIGVLPIGYADGYPRALSNRASVLRG  
MCSPVGRVCMMDMTMIDLTGIPGARAGDEVIVFGGRDLPVSEISGLLGTIDYEVACMYSK  
RVPRVHFDEPAQDS\*

>SPBIB\_v1\_400024|ID:27164239|dapF| Diaminopimelate epimerase 1 [Uncultured spirochete bib]  
MVDRSIPEGFHTHKYNALGNDYLVIDPAEFDVSLNEEAIRALCDNRNGVGSDDGILYGLA  
SFEGGIWRVDGETLAEADNESRVARTSPFFLRIFNPDGSEAEKSGNGLRIFSLYLHESG  
RVGFAPFEVQTKGGKVACTVLPGEGPERRITVAMGAPEILSNRLTFLIDGIEFRAVSVSM  
GNPHCVLLGSRPSELARRIGPIIEHHPDFPNRTNVQFLEVLDRNIRIEIWERGAGYTL  
ASGSSSCAAAAAAKHLGLVDDQVAVHMPGGVLEIDMREENIRMTGPAVRTFDALLAPALY  
SAAYARH\*

>SPBIB\_v1\_400025|ID:27164240| Amidohydrolase [Uncultured spirochete bib]  
MENLLKEALAMQDWLIDTRRTLHRIPEPGNEEIKTSQAICAQLDALGIPYTRIGTGVVGL  
LEGARSGRCIALRADMDALPIEEPQDRPYASQHPGYMHACGHDAHMTIALGAAKLLARRR  
HEFSGSVKFLFQPAEETTGGAKPMIEAGCLENPHVDFVLGLHVIPELPAGQIEVKPGPFY  
GASDNLEIRIKGKSSHAAYPEQGIDAIVAASAVVQMLQTIVSRISALDSAVITIGKIQG  
GTRSNIIASEVVLGTIRTLSQVRKFIGASVEEVCAHTAAAYGASSEVHISPSYPVLVN  
DEAATEFVRQTAIQVLGAPNVHLRQKPTLGVEDFAYYLRERPGAFWHLGCGKHPPLAADS  
VGSISAGATAALHSPDFDIDESCLPIGVALQASTAMRWLLDI\*

>SPBIB\_v1\_400026|ID:27164241| protein of unknown function [Uncultured spirochete bib]  
LGSLSTNFETLQDIWISNAQSATLKSGLLEPLIILRSKDPNLTQGVYSDLLTICINQF\*

>SPBIB\_v1\_400027|ID:27164242| Peptidase C26 [Uncultured spirochete bib]  
MAQPLIGITSFADRARQPAPYISLKESYVRAIEAAGGVPVILPVADAVQACAIIPRLDGI  
LFSGGGDIAPWYFGQEPLPGLGSYDTHRDEWEIELCNAAWDAKLPMLGICRGCQLMNVAR  
GGTLIQDIERTKPDALQHNPAVPHDELCHDIAIEKESALAKLFGTGRLRVNSFHHQAVR  
AACDFAVTARSSDGIVEAMEAKDGRFALALQFHPEGLFMRYPDFLAPFEALTRAAAARLS  
SLRS\*

>SPBIB\_v1\_400028|ID:27164243|lysA| Diaminopimelate decarboxylase [Uncultured spirochete bib]  
MQRILHAKGQRMVTTHFPEGIVADDARWLFDFGADLAALAKEFDTPLYVMSEALIRQCAE  
LRS AFLARYPGTRAYYASKAFQTLMLRIKDEGLGVDVVS GGELYAALKAGIPASEIIF  
HGNAKTDEEISYAVQSGVGRLVVDNLEEIYRIEREA AHAGIAQTILFRVTPGVDSHTRF  
ISTGSLDSKFGIPLASETARYVAALRECPHVEFAGLHFHVGSQLMENSSHLAALRIVLD  
FAARLVREFGLAVKELDMGGGFGIRYLPEDNAPALSDFVDPMIALVREWSEREKLPAC

AIPEGRWIVGEAGLTLYRIVAVKEIPGVRAVAVDGGMGDNIRPALYEAKEYHAAIVGRAD  
AGLGAASNQLRRVTIAGRYCESGDILIRDIDLPDPRPGDILAVFSTGAYCYAMASNYNRA  
PRPALVMVKKGKARLSVRRETYDDVIHREK\*

>SPBIB\_v1\_400029|ID:27164244| transposase [Uncultured spirochete bib]

MFVQTLFEKKTGRTLLFYVTARRVKGKIVKTKVKRIGYLDEFLLDAPDPLTHFRQEAKRL  
TQEAQLKTLTVTFMSDEHFSFGAGFAATEDAAVEKADRTFHYGVLPLLQLYRELKIDAFL  
RIKAQYTKVDFNHNHLFQMLVFGRILFPESKLATWRDRTRILQHSDFSDDAVYRALPFFA  
QIKDALVQHLHEQVQRQYHRDTLLYYDVTNYYWEVDREDELKRKRGVSKEHRPEPIVQLG  
LCMDNSGLPVTYGLFPGNTNDVATMRPMMQHLAESLGTKHLIYVADKGMMGGMNIAQIIL  
EHNGYVISSSVRKADAELRRYILDHEGYTELAGGSFKYKSRLVPCTLYVDTPDGRKKQIR  
INERQVVFWSSEYWKARHDRDMAIAKAMARAGYGENTVLNNHAGNRFIKKEIFDPDTRK  
EVDHPEFSFALDQELLDSEEELDGYLIRSNNVGVREGDAPFNQPYRWHAKDNLFELNRP  
VVDLDIIDMYRGLWRIEESFKITKSQLKARPAFVHRQDSIEAHFLSCFVALLLLRLEKR  
TGEKIPVATIVESLRKAQLVQLEDETYVNACCDNVIEAIGQALELDLTKKYYTKGELKAL  
RGKTAKS\*

>SPBIB\_v1\_400030|ID:27164245| exported protein of unknown function [Uncultured spirochete bib]

MKKFVVFLVIGLVAGSLAWSATIGITVNAQAQKLEVTDAATWTIALDNTGTAIDVPNQQG  
LTVKSSKASYTVTFTSTNGGTLNNGSYTMPYKVKVDTSSWVAGVATNNLSSYTQLTSAKP  
IIFQLKTPTAGKTFPIGFNIEAYTDYYVDGAYTDTITISIAQS\*

>SPBIB\_v1\_400031|ID:27164246| exported protein of unknown function [Uncultured spirochete bib]

MQAKNTAECNMKKYLTLTLLLLASIAVYSQSIGVTVIAAPVGANVTMNSYVWNITLAND  
GVTSYLNDYQGIMTVKSGSSVNYRVDFSSQNLGYVKQGSSYQIPYYVYVTQLTTGHIGII  
GTPAITLGYVQLTSTQSIQFNKKTPTGGIQFYVGFKITATAGEFFESGAYTDNMSITFTA  
L\*

>SPBIB\_v1\_400032|ID:27164247| exported protein of unknown function [Uncultured spirochete bib]

MDKIRPYLLAGLCGLLLGAGIVGGCWIYRAGNDAATNRAVISAQYQSAMADWQRRATELAA  
TLDDVRRDARQSVELAGRINAVVTGYFSDIAKARTENELAVEQLRLAIDIYNVLRGFYDK  
GFNATPKTGATAKP\*

>SPBIB\_v1\_400033|ID:27164248| exported protein of unknown function [Uncultured spirochete bib]

MSGKKFKAWLIMTTVLVGIYMLTLFVAADILTSGIGATIVGAIAFGAVGYGGVQVADSWQ  
RAKYRPELDRTEEEK\*

>SPBIB\_v1\_400034|ID:27164249| protein of unknown function [Uncultured spirochete bib]

MIKDGIIAGFDELRLPSQPMNRRDHFHGALDIARGDGIVLSPVDGEAQGFVIFRGVEP  
NVQVRSWTQGEKPDILALPWREYWQDIYGAIIVIERGTRKRLHILCHFVPSRVLNHDPEF  
DGPFHSVYYLEERQKTRWPSHILMTDEVYVKQGQRLAPVGNAGFSTGPHVHWEVHHQADR  
LDEYAKRVNPAKEYL\*

>SPBIB\_v1\_400035|ID:27164250| protein of unknown function [Uncultured spirochete bib]

VDLGEKLSALELSHELASVWVGDDKKRDNGLRARVTKMAEVEIPAQSSITSLNSCVDD  
QGKRLEAHIKEHSENKDDATIRAQKVRAYGVIVAALLGNAATIITVLLTRGK\*

>SPBIB\_v1\_400036|ID:27164251| protein of unknown function [Uncultured spirochete bib]

MDYEQIQSLEAEIENLKKDLALTDWYVVRFAETGKPIPEEVLAEQEKQRINDLQEQIR  
SMMAKN\*

>SPBIB\_v1\_400037|ID:27164252| protein of unknown function [Uncultured spirochete bib]

MGVVSTGQLTYDVNDPTSSLFTEFDGDWASRWVNYVSGGEMSVAVDSTLPV GALALTV  
GNSNGNDMVWLIAKQNPFDANKLYKLTIFYVKRTAGTGTTYLG VAGVAPDGVTLVNNTGV  
NSFSNQHYIAASGVSPGSSWTKYVGYIKGTAATGTTSACPTPESPGKLHTNCRYFRPMIL  
VNYTAAAGTNVVGAVTVEVMPELADIPNGNDTRDKAVASDAQLTAMASDSIITPQEKLFA  
LGRWCEWYNDTAATSALPTAPTDDGRYKRIVDSANSVSGWTPPTAGTASAFYDALEALR  
AYLFSSPGVVLAGTWSTNITITKSTWLTWVTAETAQALETEIAGKQGLTANLSNDSHL  
VPTDADGNNGNFAGCATTMSIYKMGVDDSANWTV AARPSSGVTGSLSGKTYTVTALS VDA  
GYVDLTASRTGYPSITLRFITVKAAGGAAFWLVSSADAIQKSQAGVYTPSTITFTGKRSA  
SAGVVVDYAGRFI AETTDGSTYTDKYTSSANETSKTYTPSAGIKALRCRLYLAGGTSTL  
LDEEIVPIVVDGPTGPTGPTGPQGPTGPAGQDAPRYLGLYAYANRGSITGMIAGDLVVLY  
SATQAERGIYAYVSSTWTKQSTPTQDQIMRCMVGVLDVVRQGYGVSADYIGAGATSFETL

LVNFIYAQYALISGSIRAGTRYDQAGNETNPTKEGVWIGANGKIKGAINDVEPDQVTPSF  
TRRQLFTSSGTWAVPAHVKWVVRTAMGGGGGGGGGGGGVTSASAEVGTAYDGNAGQNGGASS  
FGSYVVANGGAGGTGTGGGGGGGGTQNGGSSDFIGGYNGANGGAGTAKGTTNSAATGKT  
SGAGGGRGASSGLYDANVELSNASGGLTKTPTISAGRSKTNSASASVGIIVSNGGAGDAG  
LYGAGGGGATGGCYAYKSPDASFSAWGASGGGGGAGALRQRVFRINEVYGQSITVTVGAG  
GTGGTAGGGSTATGAAGNGGKGVVLEW\*

>SPBIB\_v1\_400038|ID:27164253| conserved protein of unknown function [Uncultured spirochete bib]  
MGIVSTGQITLYDYNDAAPIAFISASKGTAQVFTKDESITSYNPDYSSAANVLTAYVYV  
NGVNVVNNLTNRKWGTTLGGSDLGTVSSITKSTNIDPANPVYVYFEGDYTDPVTMLVT  
HVNAMITLHCVKSGTNAVVFVQVNGQLVIEGNPTGGTKNTASVTADLMRAAGIDNTGVTYQ  
WFKSPYAAADQLDANHVDVAVAGKYSFKNTAGSAASAPADGTWADVKTLLVREDAVNDIGL  
YLVKAKDADGNIYQAYFQIYDVSDPYDVKVVAATNGNVFQNGNGTKNLTPEVWYGNTKIDI  
TNYTFTWKLKDKNGKSGFIDTARTSAAKTISSHTTGSSAVFTISSALSSAPVAGDVIRV  
ISADGLKIESFEVASATTTAITIRSPQNGFSNNYPASTSDYANGKLWLYVGNAGATAGQKT  
TTGSTALSVTGDDIDGLGTVFCDAINPNV\*

>SPBIB\_v1\_400039|ID:27164254| protein of unknown function [Uncultured spirochete bib]  
MIRKIFVELAFPGDSA WTDISALVLDKSWTIDRQAFNDEKKSTLTKFTCSLKFQDQILSK  
IRAAEERIGIRVKDL DGNPLFFGAIEPAVSHETS DHIGDIAIEAADNSWRLDDKIKTTRQ  
MPANVTDAGFYIWN PADQQHSICHILLTEAGYTEAEIDGSLSDLRQIEMVSV EAEASTYR  
EVLDTLLMEHEL VLHAKPDGTLTLLSWRPAAITATIDKNLSLSTVKPFRFENRFDKRDGAK  
ITWAQPEIIPDVLVYRENLPVDENG VFTGEAIAAGDYFPKDSIEDIYQSYVENWLD RPY  
LARETRIKNKDLTLIATSEPR LFYDADDGITPDIAEFYKRAHIRFINNASETKKIYNFE  
IKANVLIRKKIGITKASPLGTETDLLEYTSQYIFDSTAADALAQALAFDALAE EQYSFGL  
NEIIEIGSRVRIIEQRNGTDVEAIIQKTRLSGESPVNEYEA VQFLYEGNLQLNHDYSLGN  
QIWPPYDYQQVVQRLEDVSRV FYDQPVGPYKRGDLWISNGILYQSKETRGTGEFFDSDWE  
WCIRSNLTTIESTNGDVFKPGENTTTTLIARCFRNGIEITDTLPDSAFRWTRVSRFPQQ  
PPNDDETWNYNHASGYRTVEVTTDSIYARATYKVEILE\*

>SPBIB\_v1\_400040|ID:27164255| protein of unknown function [Uncultured spirochete bib]  
LIEDEKKKWEDYYKYLSQAKETAKEVLASGLLDQFN SIGAAMASGASSADAAEAAMHKF  
FQSALQQTSM LALNAGLKL VEGGLPMLPV ALGLFALAGISGIAAGAIGAAGGVRQTDYD  
QYIVNPIVDAETDLAKKRVDIIKQLEDEK KLRDENLKKIEESFNTEYEILKDQWQRGLI  
STEQYKQQSASLRSQEE SAKAEANKPVEEAEALLAQIEAARDQKLSYLATEAKKRQDELN  
SMSGWDFKFSGRDEELVAELDVL DARIKKVKEA QSLPEISAAKYGADFVTQGP KMLMLVGD  
NPGGRERVRVEPIGTPNRYGPQPEQITIQISGDIYGIDDLYQKLEAAGRKLLKAGRVRTG  
VFA\*

>SPBIB\_v1\_410001|ID:27164256| protein of unknown function [Uncultured spirochete bib]  
LRYSSRNSKRSLQRWRKCAMADVEDLKIILRAEVDKAIADLKRASREGKNAEKDWQ SIA  
DTFQKNIQHSLSLKNAFS QLTMQIAGGLAIYDLAAKGIRAIQFAADSIREYKEAAEAHA  
RLAAQIKATGGAAGFTAAQLEDMASRLQGSTRIEAEEINKAQSALLKFTSITGEQFAKAT  
ELSLDLAAVLGGDVSGAAQTLGKALEDPI SGMSSLRRAGVVLSEGQEQLARSFAESGNTA  
KAQEILKALQDRIGGVAAA V GKEDPAGMKRLQLAIKDVKEEIGELLAKNMKPFLDALAT  
DIENFRKRLANSKTDAAA VVQAVKFGDLIDVGDVSGIRQAVQNL SGKVDKEIVKAWIEEA  
KKRNPLATQAQAAAIRAAEEELAKMPALQVAGASGSANNDADIKAQEHIKNVTEELN KNI  
QAIKLRSALGQEASSQELLTQYLNAYVKLIQNSDGLVTENNPAAKLLKIQIQALVNGQK  
ELSQAELATYQIEKAGEIEAXX

>SPBIB\_v1\_410002|ID:27164257| protein of unknown function [Uncultured spirochete bib]  
LAFADCAADDPDWENFAPDEYEILPSSIDESGKMLVKRRDVPNLLTDPLFLSGWKEWTRY  
RRFGLPHGGGWRNEKPLVIRVIEVFEQEFEAKQAAEME KMRHG\*

>SPBIB\_v1\_410003|ID:27164258| protein of unknown function [Uncultured spirochete bib]  
VTTYEPDL SWNIWKEQPKN NAPGIMP DDEKVKVEITWPD IETFERLIGNDSTFATFITL  
TKHCATKITGFS LHGEPIETGAELAAVRAGRTSKARELAINIGSYIFKESLLDEEEKN\*

>SPBIB\_v1\_410004|ID:27164259| protein of unknown function [Uncultured spirochete bib]  
MAVLKIRAGANPADPADVQLWFGEEAIENAKVIEAYNDHGK KRVIAEIIWEEKLGRKEVE  
KSDKRKGDNLRAGSVVEHMEGTAQK\*

>SPBIB\_v1\_410005|ID:27164260| conserved protein of unknown function [Uncultured spirochete bib]  
MANRFSGTKNYLYLGLSLGTEVTTGSLSGEKFFKITAKGASSAFPADSVANDVVYNKPAIT  
LASGDKAKPIELTKLGFVTNVPQSASKEKYENTVQTDVAKSYEEGDKPEISGTIDGYFTD  
DANADLILKRFFRLIDDNGAGQKTYQPIETGVLHFFLGRRETTTVGQVEVMEYMPAIDS  
LTVDKPMNGPQTFNFA YTVIGNEMPSITRRTITA\*

>SPBIB\_v1\_410006|ID:27164261| protein of unknown function [Uncultured spirochete bib]  
MKIWNIRYRTVKGYLEQNLNSKIEALATDANIACAAAKAFWVGWRDPFNLKDYNVVFVVPD  
TLKRNDDAVTDDVSIHIAALKSPTPDSLSDQMGIYADAIATVIEDDPTLGGVAFEANVI  
DFDFSLPAPGSPLIGALTAIIMVRMDRI\*

>SPBIB\_v1\_410007|ID:27164262| protein of unknown function [Uncultured spirochete bib]  
MISMTVQTKKYGDLGKFADNELLKMSARITSLWGESLANIYIRENQLSGQVLQVVTGETRA  
SMGFYKLLKDKKATMVVRPGKGVKGLNYLAGMQRGMLAGRGRKVLIRPKPFMKPGFRAW  
RATGEPRIKEEVFQAYLKHSFASGGSA\*

>SPBIB\_v1\_410008|ID:27164263| protein of unknown function [Uncultured spirochete bib]  
MMLSTDALTSWETA KTMLGFADDQQS VVEFLINAVSATANRISGRRLKARDYDLRLNGTD  
KNSIVLPEYPIVSLSKVYIDGNREFPPESEIDPDMV SIDPDGGIIRLHDMIFPAGIGNVR  
VIAKLGYPVPQDLELAVLEAISYNRRRLESGTTGMRQVSVDGTVTSQYELGLPLSIREV  
FEGYRSNL\*

>SPBIB\_v1\_410009|ID:27164264| Phage major capsid protein, HK97 family [Uncultured spirochete bib]  
MDSVKEMLDNLGKEWKA FRD VNDQRLAAIEAKQGHAE L DAKLAAIEKELTESKAQINRV  
MLGARLGGAEKSELYRAFTDWMRDPGRSQQFKA AVQVQTGGDGGYLVLPELEKTLQRVV  
SDSVAMRQLANVKTIGGKSYLKNVNKGGITGGWASEGETRSGNNTTPGLAQIEIIPRELY  
TLPSASQEALDDLD FVAAWLAEEAGIAFSSLEDA AFIAGDNGKPKGFLAETMVANSSW  
AWEKIGYILSGAAGAFPTTHPGDVLIDLIALKAGYRNGAAWIMNDLTQS VVRKFKDGGQ  
NYLWQPSFQLGKPD T LCGYPVMISDSMPDIAADAY SIAFGNFKQGYQIVDRKGVRLADP  
YTTKGAVTFYTYKR VGGAVADYNAIKVIKFAAA\*

>SPBIB\_v1\_410010|ID:27164265| putative Endopeptidase Clp [Uncultured spirochete bib]  
MIRSKWYAIDIAPDYAEISVFDEIGGFGVSVTDFKEQFDSIKNAKQIRLLLNSPGGAVTE  
GMAFYNLLASVRDKLTVEVIGLAASMASVVALAGSKLVMDEGTYLMIHNPWTITWGDADQ  
LRKDADVLDKMRSELISIIYAAHSLKSPKEIGQMMDETWT LAQEAFDSGFADEVRET VQA  
AALYDVS KIGFKKIPMALKHLD FR SIKTIRDFEAF LR DAGATRAEAAA IASGGWKALQRD  
AEQPKSEDDGEIKEALSGLISILKGESNGL\*

>SPBIB\_v1\_410011|ID:27164266| Phage portal protein, hk97 family [Uncultured spirochete bib]  
MKFGERLRLAARALIFGSDDWVRAL KGY YETASGQIVTADTAMRIATVNACVRILSETVA  
SLPLHVYQRLDNGGKERASDHPLYELLHSRPNPWQTSFEFREQMMSHLLLRGNFYAVKLY  
HGDLIIDDLIPLNPDNVTVLQLPDYSLQYQIL TGTGSESIILGQKDILHIRGLSKNGILG  
ESVISQARDVFGSALATQEYAGKFWRN DATPAGI I K VAKKLEKGEADRIREIWNDDHAGS  
GNAHKLHVLGDGASFEKIEMTAEDSQLIETRRFQRSEIASL FKVPLMMLLQADTQTTTYAS  
SEQFMLAFTMHSIRPWLVRIEQALQMQLFTAPQKYFPEFNLDGLLRGDLKSR YEAYKIAR  
DAGWMSKNDIREKENMNPIENGDDYRSLAELQNAKNLTGGA\*

>SPBIB\_v1\_410012|ID:27164267| Terminase [Uncultured spirochete bib]  
MRNKWLFLAVAIMTASLRPEILYAEKVLNGEIVACKLVKLACQRHLDDLKRQNTTEKFPYT  
FDAARADHAI AFIEQLRHVEGPSASTIGGRDNRIKLELWQKFFVGNLFGWRRADGTRRRFR  
HVYFEVARKNAKTTLGAGIANYIFWADRPADPGCQIYFAATKQEQAALAWRIARLQIERH  
PVLKNLGKTYESKQYIVKTMKDAKGRPISDWSSMRPLGQDSKTEDGLNPSLAIIDEYHA  
HPTSEILDVLESGMMARLQPLTLILTTAGSNFDGPCYQVERPLAVGILEKTLQPIPEDVF  
ALIYTLDEGDDFADPKVWIKANPNLGVSVMPQLLESRVAMALAAPARARDVKTKNFNIWQ  
QSINRWITDDIWMACAEPVDEETLAGRHCTLGLDLSTNTDLTAICAAFPPAEPGEKWKTI  
WRLFMPMDNLLERERQDKVPYTEWARLGLIPTDGN TVDYDFIEQEIRIFGDKYLIDEIA  
YDPFKAGEVVAHLSSEFTMVA VPQRYNPMAIYSDIFERLVRKGELAHGGHPILRWMMMSCT  
EVKADRQGNIMPMKPRRETS GKRIDGIVA AIMAIGRASITNGGETGFAKADEVVVG\*

>SPBIB\_v1\_410013|ID:27164268| Phage terminase, small subunit, P27 family [Uncultured spirochete bib]  
MPKPRVPTQIKVIRGTFRRNEAPANEPQPDLLKAAPKPPAHLNKWAKRMWKDIAGKLLAL  
GMLTDIDLTYTLEVLCEQYGIYRELKDAITHRDT P AGREKISIAQYLAGQNSQTIPEYAAM

RAAFERYTALLKEFGLSPASRSRMDIPREPPKAVDPMEEELNAK\*  
 >SPBIB\_v1\_410014|ID:27164269| protein of unknown function [Uncultured spirochete bib]  
 MDVAARHVYMAAKGLWMPTKPARMCKYPYCPNLTYDPSGYCDIHAAMRQAGRMPDKRPSS  
 PRRGYGRDWQKVRAEVLTKAGIPRDLWPLYDVDHNPYPNPAIEPDHRKYTLIPRLHGEHS  
 SKTNREDGGFGHRRGESISLQSFVNRMRCSMSHTTDSRGKGVVRA\*  
 >SPBIB\_v1\_410015|ID:27164270| protein of unknown function [Uncultured spirochete bib]  
 MKTEQMAENLRQLYVAGKIEIGKTYHVLPSDCSGNGMDIALKNRLDESADYDLGNGVVAK  
 CRCSVQVGSTRWGDGIPTLYSIEVYCPDNQSKIDLSKLSNESLRKLNALARKAGYKSCTE  
 AYYDKIDEPVIKHEPWGFETKSGKFFPGIRTTKWWKSGNYRPAKTIIYLPESFNL\*  
 >SPBIB\_v1\_410016|ID:27164271| conserved protein of unknown function [Uncultured spirochete bib]  
 MSRRTTVYLNKNLEALLKKYAERLNTDEGEYGQSATLTEILGRYDELVRAERRRLRDLFE  
 ENEINLLLNNALSTIYSYQTIIGAVLADTEDEDEPSQFEFFGVDRALIEKLRNLTPGQQF  
 ALVDWLEEMRSAS\*  
 >SPBIB\_v1\_410017|ID:27164272| protein of unknown function [Uncultured spirochete bib]  
 MRNLELEMEA YRKANSYL YSKHIRNAEEIIRVALLQCKNPAIALSGGKDSVAMAGLVCKF  
 CSPKIIWNDSGLELPESKSIIYEIADRFGLIIVAKGCAIEEAEAIIRGELSRYDKKVIN  
 SIDTIINPVRKALIEHGIDLEFVGLRKKESIKRRMLLSQYGPIHYSKKWGKIAWPMMNW  
 DGRDCLAYICENNLPIHPAYLMASDPAMARVSWAFDTAREAPAETEVVRRNYPEIYRKLK  
 EAGLCQ\*  
 >SPBIB\_v1\_410018|ID:27164273| protein of unknown function [Uncultured spirochete bib]  
 MHAINLIAQSVRTLAPALPCDPIEATCAVTGQVCPCLPRREVLGDSFTNIDCLRAPESF  
 VGVDVYIAWFFGYKTTEDEKRLKCPERMASWICDGNFRELRSRIEIREMVLNGIPYKQWA  
 AYTTSYKKGSLWARVNIGPRGIWRFEMIDADCRDENKTREYWNRMNAAVNAGIGRGI  
 ETLDMPPYLTMKVGMKTWIEYEKWKAPIYQSGLYQFLAYLLPSAEERINAKSGIGNGGIS  
 KSKQLSLF\*  
 >SPBIB\_v1\_410019|ID:27164274| protein of unknown function [Uncultured spirochete bib]  
 MKDILLTIFAVLRFIYNHSHKITGKRNGSEFFADRIVQAATEKTLLAFAERLSKLVADIG  
 SIWESRGVEFLRISGTQDAKVVYQWIRLYPRIVAMISALPRMEQVEEAIESIEIESVKED  
 GCAIPQGGKYEIPIEITLSPLAHGADIKAGNATLFRRMQVLSDTGATLSLFPYSGNALRG  
 QMRDLLADDFLRAIDIKPSRTNPPIALWFFHTIYAGGALEENSDAAKAFGKLLGTNGAIK  
 AEGIYQFRDTLPMISALGCSIGNRIIEGRANFGDFRCCYEWSSNGNIKVSELMTWEFLTR  
 REDFEGHEDGDNKSMIATIECIKPGVVLQGGIDIRGHASELERSVIGKGLSLLADRGFIG  
 AYSRQGFQGVRIEIEENAPDGKLYENYLAENKKNKIIDYLESLGAICMP\*  
 >SPBIB\_v1\_410020|ID:27164275| protein of unknown function [Uncultured spirochete bib]  
 MSIGKDLDEIAAELMRLDYGELHIVVRGGEIVSYSIIRSKLVLKRNEKEHKQLQEKQY\*  
 >SPBIB\_v1\_410021|ID:27164276| protein of unknown function [Uncultured spirochete bib]  
 MSAPWRQVHKTFWSDPKVVDYFTPEDKFFYLITNEHTTQCGVYKISLKQIGFETGYSI  
 ETVKNLVERFQNGLRIRYNPETNEIAILNWAKYNYPTTIKDNRFICIQEITAVKDKSL  
 IADVLQNAVPEIRDALLMKGDVSTSDAPYKGLGSPSEAPYKPLGEEKEEQEQKQEQKKE  
 KEREPRAREASFPQEKPENKPAVRLAEDWFRRFNSMTGAKTKPDSKSLELSRRLLEFL  
 GNDLDMALLAVDYFRESHWRELWFACERWSRSGPEDLRKWEFRFASFADPENCQEILSRIA  
 RQQETKSHDSFSAARPGDDEPPIDPEENAKAWQRINEFLRQKIAAHEAAMTA\*  
 >SPBIB\_v1\_410022|ID:27164277| protein of unknown function [Uncultured spirochete bib]  
 MRIGSFVVKNDGSKTMSGEIGSDVGLSVPAGQRLYAKLVRNDKKKDAKSPDYFLEAWM  
 PREKERKDYKMQFDPQRNDDAVF\*  
 >SPBIB\_v1\_410023|ID:27164278| protein of unknown function [Uncultured spirochete bib]  
 MEYLPLDEQTKMPGLVLKLPQLEVIEQLLHAALDGGPQRWYTTLEQAHYRKHGSLPGGVSL  
 KTIKNTLALQPRGGIPDGWVSGRKAWRAETIEEWCQIDDSNLEAYLKMYAPHLRVPKRIQ  
 EANARHAIEYTAFAADKETEHEEEDPAARS\*  
 >SPBIB\_v1\_410024|ID:27164279| protein of unknown function [Uncultured spirochete bib]  
 MANGKNEYKSDNEYVKFDRRSFASFKIFIEKLSGAAINPKHHAAMAILPKGWRNILAFSL  
 WKNREEFEANLDEAAARLGAKILNDWWASADGILISVFPSSAFTFAQSIKDFHMLDEPA  
 VDKASQKQILKGRK\*  
 >SPBIB\_v1\_410025|ID:27164280| protein of unknown function [Uncultured spirochete bib]



MITEVVEYWVDGRKVTTL DALLRIVGA KSNKEIDDVRA CLA QSKPYKVHRIKQVYGIPAI  
RTGALLHDPCIHRLG\*

>SPBIB\_v1\_410026|ID:27164281| protein of unknown function [Uncultured spirochete bib]  
MIRLFIPGEP RGEPRTRATRTMSGKVLVYHDASADRWKQVQLAFALKRTAMLTGPPVAVS  
MEFISKPKDPHGYYSTKKPDADNLAKAALDALTKARAWKDDAQVACLIVTKRFAQPKTGE  
QAGAFIEIEELPQTMDPAFPASLAGYMGGRGFLRVCQ\*

>SPBIB\_v1\_410027|ID:27164282| exported protein of unknown function [Uncultured spirochete bib]  
MINRKICIFSLFFLLLLTLNAIAQSDSNYIVNYFVDDFGDPTEHKYLFTIVTGKFSNSAT  
KDSILKVGVIADSEISFALYEYGSNRVTGSDYTDYVIKMKFPNGHIIKTTKIDKYSGR  
LEISSIFDSSIDFDTMFSGNAPIKIYIEKDRPYANYSFVTFPSKEFISNNLGSDFFWI  
Q\*

>SPBIB\_v1\_410028|ID:27164283| Exonuclease (modular protein) [Uncultured spirochete bib]  
MIIFTLLIVGLIYLIIRSKK PARKDIREPIYPRAMPPQKVHPRDMVVREIKEWLEGIE  
LTDVIVFDTETNGFY PDESSL SIGAIRYSWDPYEKLKEKARFERYYYPKEPFNERAIMV  
NGLTKEKIAELRGDATYPEHFLDDYLAFKEFCEGVRLIAGHNVSFDVGFVFPFLKNRRKLD  
TMKSNADVVCVEWMDSKNDWKWPSLEETARFYGVFPNEDDAHGALYDAMIAGEILKRMLD  
RAEVKVQII\*

>SPBIB\_v1\_410029|ID:27164284| conserved protein of unknown function [Uncultured spirochete bib]  
MGKTSGLKPGQKAPASGQYQTVGPKGGKKEVTAVKGEPLPPTDKPGSTYNLVDGTKNKS  
GKA\*

>SPBIB\_v1\_410030|ID:27164285|rflA| Phage P1-related protein in restriction modification operon RflA [Uncultured  
spirochete bib]  
MDDYINIYCD ESHLEHDHQAMTLGAIWCEK KKIKEITRRLIEFKGKYGLRH ESEIKWS  
KISSNHYPYLDIIDIYFFDDDDLHFRGLIIPDKSILNHQKFNQTHDEWYYKMFFRLLTPI  
IDPNYKYNIFLDYKDIQGAERITKLHDVLCNNMYDFNHSIIESIQLVKSHHVELIQLTDI  
IVGALSYNARDLNTNAGKNKIIERIKQRSGYSLTRSTLYRESKFNIFIWDPENEDHNA\*

>SPBIB\_v1\_410031|ID:27164286| protein of unknown function [Uncultured spirochete bib]  
MLNFLPPLL TLEDVDYDPNRLIMEAYRIFRKFIDNKPYFHATPIKLAQGIGNDGKENTF  
WHIISGTDKKITISKILILTA\*

>SPBIB\_v1\_410032|ID:27164287| putative Integrase family protein [Uncultured spirochete bib]  
MGTKYHLFRRLNLSKGGKYTVWYYWYKENGKQIRKPCGRGCR LKRDAE EFKLEAQES  
TSAPSIHVLKSKNSNFASATYRTFQDLAAEMFLPDSLHLKRQTLADGIAIKETTRLAHRG  
RLENYLIPKWGRSPFARFEDEGFA YDFQDWLVGLRKAGKDEPISNSLRNNILETMSICLR  
EAKRKRLIKTVPDMGTIRFIRHSRRQNTLSLEEIYRLFPE DPAALDAVWRRKDSRDYPGI  
GILFGTMFCLGLSAGLRSGELRAVSRDQFVIHSLQDGSYLYGLIVDRA YDSTGQISSALK  
KGN DENLRHRAVILSDKTMRIVNLYLDASA VVDGPIFLFHGHPVSKELLNARWKVGLANA  
QIDMSGNRRMTVHALRYTYNTRMKALVSEQTLHEFIGHNSSEM TDHYDRPHMEERLLQLA  
DQRGAVERFWG\*

>SPBIB\_v1\_410033|ID:27164288| protein of unknown function [Uncultured spirochete bib]  
VRGANAFARANFAIRCVA VDPFRAVAQGLARLVRDQDVGGSNPLSPTTESHSIERLYLFM  
\*

>SPBIB\_v1\_410034|ID:27164289| conserved protein of unknown function [Uncultured spirochete bib]  
MSEHSLLYSFRISADAASALEKLPACIDEANPVPERKRASLRYSIRD LWRSLTMERALRN  
IDYLN NPAFFSA YLRYFLPWNLVRLIALLT ELPLELKN GATIVDMGSGPLTFPLALYCAK  
PELRKVPLTIICADRPRIMEAGKLILELLAAKHGGELPPWNIELRHLRFGEPIREKADL  
FCAVNVLNEFFWHHEGMLADDAAEVLRKIEHYCTAGGSMLLIVEPGEPRSGGLMSAIRAAA  
ILSGNVVEAPCPHANACPM PGIFKSGQEYLTGRASQFAHKEAKDEGQKERA IKDNRLLEP  
VQMPSPRTKY PWCHFSVPAEFAPRWLRKLSDESGLTKEKLSFSFLYIRKAEGNTSRGRVE  
QARESLCRIVSDPILLPRDRAGKYACSAAGYTLVTAASGMELPASGSLVRMHKGGKIERPG  
TPEIDRKSGAIVSY\*

>SPBIB\_v1\_410035|ID:27164290|tdh| threonine 3-dehydrogenase, NAD(P)-binding [Uncultured spirochete bib]  
MKALVKRKN EPLWME EAPVPKIGDNDLLIKVKKTAICGTDVHIWKWDTWAQRTIRLGQI  
VGHEFVGEIVEMGRSVQGYKIGERVSAEGHIWCGVC RACRAGRRLCPNTV GIGVNRDGC  
FAEYISVPAQNAWHVHDAIPDEIAAIFDPLGNATH TALSFDLVGEDVLITGAGPIGMAA

AI SRHV GARNVV VTDV NPWRLELAKKLGATRIVNVSKEDLKEVQKELEMVGGFDIGMEMS  
GSPQALEQMIENMYNGGRMALLGLLPDGAGIDWSRVIFKGLFIKGVYGREIFETWYKMQT  
MLLSGLDISPVITHRFSFDDFEKGF AAMLSGEAGKVVLSFE\*

>SPBIB\_v1\_410036|ID:27164291| conserved membrane protein of unknown function [Uncultured spirochete bib]  
MEKLALLAAFGTAVFWAFSAIFFEDASKKVGALAVNFWKVTF AFVFLAISGTVVRGVPPF  
YDAPLRTWIFLGLSGLVGFVISDYFLFNAYVLIGSRITVIFQSLTPVFTALFAYIFIAER  
MQAHRFVGM AVTIAGILIVL TRSKQSRQNNEGALS AKGLLFAFLSSVFQAGGMVLT KAG  
LGDYSPISGTQIRAFIAIFGFAINALLIGQGAHVFLKVPKIREAFSSTIKGSVFGPFLGV  
ALSLFSLQNTQAGATSTLMALTPVVIILPSVFILKQKIHAEVVGAAVAVAGAALFFLL\*

>SPBIB\_v1\_410037|ID:27164292| Transport-associated protein [Uncultured spirochete bib]  
MAVICISRELASYGEETAQELAKLNGYRIVDKEHIEAALTAIGIDANKQARYDEKNPGFW  
ASLSQQRDEYLHFLTQAIYETALENNCII LGRGAHAILKGIPNLIGIRIGASKAVRVERV  
RKAQNIDSRHALQIIESSDHD DRAGFH KYFFSVDWYNPSEYDMTLTTDRCNPVHAAA AIDA  
FRKAFVGEAQEKEAVAKLQDLLLGSKIVTEITYNRKIPIHFLEAAVERGVVVLHG VANTH  
AAVDSAVAAANL VPGVKQVESAIQLVQEFTVVP\*

>SPBIB\_v1\_410038|ID:27164293| RNA methyltransferase, TrmH family, group 3 [Uncultured spirochete bib]  
MQAALNLQKVVLVNYISSFHSIIETLRASPQGCMLYVAEGGRHAGPRIRQIIIEAEK RGI  
AVRHLPMDLSRMCPEHRGLVLAAPLEARGMLSIEALCEHSSSKDAGLVLDHIEDPHN  
LGAI VRSADAFGVDAVVIPTRRASPLTDAAERSAAGATAWLPVIQVKNLRAAVDQLKDAG  
FWIYAADMSG SALGAKPLGKKVA ILLGNEGKGVSRILKDAAD ECI SIPMFGHVESLNVSV  
SAAILMYEYRRAHALL\*

>SPBIB\_v1\_410039|ID:27164294|pyrBI| Protein PyrBI [Includes: Aspartate carbamoyltransferase ; Aspartate  
carbamoyltransferase regulatory region] [Uncultured spirochete bib]

MTRTGPFGKRTISV VND FSLDEQRYL YRKTRELKEAALSGSDVSKFRINDLDYQVYLIFM  
ENSTRTRESFRNAGKFLGARVNVFDAATSSFNKNESITDAVKMLFGYSGESCFVLR TKLE  
GVCTWLDEAFTEYAQITGKPKPSFINAGDGKHEHPTQEFLDEF SFLEQLGW NEDHIHIAM  
VGDLYHGRTVH SKADGLRIFRNVEVDLIAPELLSMP SYVEKMKANGFQVRIFDSIEEYL  
AQARVAPIWYFTRLQLERMGEAVLERTPYLRQAVTFRKDFLGKLPDGC RFYHPLPRDRNF  
PTIPFFLDELPLNGWDGQSINGYWTRITEIAML AGRIGEDFE GEHARRPKFVDDFVHEAQ  
AQEKRKPEYKVGIKPVEEGIVIDHIATGKPVGEIWDTIDAVRKILKLDVRSSHGVYHSNR  
GPDIFKGIISLPDIISFGEKDLKKLAAIAPGCTLNLRHAHVAKKYRLSMPPRIYGFDEI  
SCKNENCISFPANNEGVLT EFIRKGETTFVCKYCEREHKFRDIWDV\*

>SPBIB\_v1\_410040|ID:27164295| putative Uncharacterized RNA methyltransferase TDE\_2619 [Uncultured spirochete  
bib]

MTAEMTLRVEKLSSHGEGIAFSEGKAVFIPYTIPGETVLCEITESHASFLRAQLLEIKT  
ASPHRVDPPCPLFGICGGCALQHIDYTHQIRLKQETAQETFRRIGGFDPGELEIVTGEPY  
HYRNRTQVHACKDSGLGFTKAGSRETVRTPHCPTLVPVLD RWFASENRKARPFHEL SALI  
GDRPRFTAFAQDERIYIEGRDAYAHATVLGKEFRFPVAHFFQSNISVLEKLIARYIEPLE  
GASALDLYSGAGLFLSLADRFESETECVESDSVAVEAARGNLSNARS AVRFS DIPAE RWI  
KTPHARQSFECIVDPPRAGLTAEVRAWLAGTDARILTYVSCD HASLARDLRDLHSASWQ  
TLSLTLDFDFYPQTGRLEAVARLSRGV\*

>SPBIB\_v1\_410041|ID:27164296| Beta-lactamase domain protein [Uncultured spirochete bib]  
MSITIRSLGAAEEVTGSKHLLDVDSTKILIDCGAFQ GKRAKADAKNRALLGDDVDPASID  
ALLTHAHYDHCGLVPYL VKKGFKGSYSTSATRDLANLIMTDSAHIQERDADYLSRQAE  
KKNETFDWKPLYDEFDVIQAMDQFVTG YHRPILIADGIQAEFLDAGHILGS AFIRVI AK  
DKEGHTAVIGFSGDLGRKNKPIKDPECLDGIDFLLLESTYGDRLHESTDDAVARLEKLV  
NRTAETRGLIIPAFAVERTQELVFYLHLLHDKGRIPEMPIWVDSPMALNATSIFAIHPE  
CYDKETYDLFTTHAKNPF GFASLNFSRSVEESKMLNQA KGP MIIISADGMCEFGRIQHHL  
MHGLGDPANTV LIVGYMAEGTLGRRLKDGAKEVRIHGDWYQVRADIQEIDAFSAHADWQE  
AVDWLGCIDKKRLRKYLVHGEGEALTAMQKHVLDAGVQAAEIMKPGEIYTIA\*

>SPBIB\_v1\_410042|ID:27164297|rpiB| Ribose-5-phosphate isomerase B [Uncultured spirochete bib]  
MKIVIANDHGAVALKQHIVAWLKAQGHVVNLGVDVEERVDYDPQAE LA VQEYQKGSYDF  
GIVCCGTGIGISIAANKHKGIRCALIHDSY TARMMAKEHNNANFVAFGGRVEYAEPVEQML  
SIYMNAQFEGGRHTQRVAKLDALC\*

>SPBIB\_v1\_410043|ID:27164298| conserved protein of unknown function [Uncultured spirochete bib]  
VIRVGKKNAAEECRMGLEPGDTFECTYETPAEFCPTSFIKIFPAMEVVRCNGDLRALGGN  
GPYETTFICPDGVVLFKLTAEKAK\*

>SPBIB\_v1\_410044|ID:27164299| transposase [Uncultured spirochete bib]  
MFMRITNSGKNGAYHYAQLAESRRDPATGKVKTSVIYNFGLVEQLDIPGMERLIASIRSI  
LPASSAMAQGAPQDYEFGLSREIGPVWLLDQLWKKLGIDTALASLVKEHQYRTPVERMLF  
AMVAQRIVAPGSKRSIERWLEKDVLIQGLGEVDVHRLYAAMDLLIESNEAVQHALFTHVT  
KKLDDLVDILFLDSTTYFEIKGEDDHEGGLRKRKRGHSDKNHPELAQVVAFVTKGGIPR  
AWVWPGNTSDHEIAQQVKHDLQWNLGHLVMVQDAGFNSARNRQILLQGGGDYIIGEKL  
AGSKGEAVEALHRAGRYKTIEREGKVLCKDVLIDEGSATQRRYVIVQNPEAAQRDKETR  
SQIVEEARRLAALAQLSGEPHRKAACRLRSHGIYGRYIGQRKDGTLFIDEEKMKRESLL  
DGKFLISTSLMHCSTEEIVYGYKQLWEIERVFRDVKHVVDIRPVYHHLDDRIRAHVLI  
IAMVLVRVAERTLSMSWRDIA YTLTDIRVGHTKGPDGELWLMSPLESEMQRNLFSTLKVKH  
PPKIWDF\*

>SPBIB\_v1\_410045|ID:27164300| transposase (fragment) [Uncultured spirochete bib]  
MTERLVIDAFLQIGKEQPGSGLIVHTDQGSQSTGANFMAVGKKKGAIPSHSRKGPNPYDN  
ALMESFYRILKREL VDDAGFRTRDQLVLNSSC\*

>SPBIB\_v1\_410046|ID:27164301| conserved protein of unknown function [Uncultured spirochete bib]  
MSRRKFDKEFKVA AVRLV VDEELPVCQVARELA VHQNSLYRWVSEYEKEYGESAFPGNGSK  
IYNYQAEINRLEKRNRELEEEVELLKKFRVFL\*

>SPBIB\_v1\_410047|ID:27164302| Sulfatase (fragment) [Uncultured spirochete bib]  
MIVRWPGIIPAGTVCHTPWWYADFRPTIDEIIGNSMPTDCDGISILPLLYGNVEQLDSRY  
YERIFYWEGYTYGFEQAVRWKNWKA VRKISAESGETSFELYDLASDLAEKNNLATNYSKL  
VEKLRHQMISNRDTSPPFWPIQFH\*

>SPBIB\_v1\_410048|ID:27164303| IstB domain protein ATP-binding protein [Uncultured spirochete bib]  
MRRPRTNRTLLREEISQLLKKMAFSQTA VQLCEEETAPMEQFLNVLQSEMASREQARR  
ARFLREAAFPVYKTLEGFDFTSVSLPPALS RDELLSMQFVAEKKNLV MYGPVGTGKTHLA  
TALGVEACNRSMRTKFFTAELV VRLSEAHKEGMLDKLLKAVLRADLLIIDEWGYVPVDH  
QGAQLFRVIADSYEQRSLLITTNLEFSKWGSIFTDDQMAAAMIDRLAHHGHILLFEGES  
YRMKHALMRQKDQIKLPMA\*

>SPBIB\_v1\_410049|ID:27164304| Integrase catalytic region [Uncultured spirochete bib]  
MLTMNQIDQIKELQRQGYGPGEIASRLRIDRKTVRTYMKREDFNESLEAHTTWPSKLD  
KPLIDEWLAEDQRMRFKQRHTAKRIHQRLCGEHAGEYDCSYPLVQRYVKAKKVAQRQMDG  
FLELVWAPGEAQADFGAEVMEAGVRKTIKYL TLSFPYSNAGFTQVFEGETAECVAQGLQ  
DIFGYLGGVPRRIVFDNATGVGRKIQQHVALNQLFLRFKCHYGFSVSFCNP NAGHEKGNV  
ENKIGYTRRNFFVPLPVVDRLVDLNMQLFKKALQDHARKHYKKGQTIAALFAEEQTALSP  
LPARPFNVERYERLRTDGYGKFCLDGKH WYSSAPEYASGEVTVGIKAREIVVYGP DGEVR  
GEHRRYGEERSDSIDWHTSIAALMHKPSAWQNSHFRAATSPSVRQALDALPRDRLRDVL  
KGLVQSSERFGFEVALASLEEAVSVARLDSYSVHAVAARHVYDGLYGIPAAGPDLGVYDR  
AFIGEKEHTP\*

>SPBIB\_v1\_410050|ID:27164305| N-acetylgalactosamine-6-sulfatase (fragment) [Uncultured spirochete bib]  
MKKEIKYPNVIFILCDDFGYGDAGCYGGTSIPTPNIDKLAEQSMRFTQCYAGAPVCAPSR  
CVLMTGLHTGHCTVRDNFAWKGLPPEGRVSLRRDDSIIAEDLKHVGYTTGIFGKWGIGE  
EGTEGIPNLKGFDEWFGYLNQRHAHSYFPTYLWKNQKRIDFSPA KDGQQGPYSHDLIVNY  
AIDFITRNADKKFFLYLPWCLPHEPYEIPAQYAWNEAKATWKDEEKAYASMVRKIDTDLG  
RIMELLEKL RITNNTLLFCVM\*

>SPBIB\_v1\_410051|ID:27164306| protein of unknown function [Uncultured spirochete bib]  
MHDTDKLPNMIHISMIHIRIIIC SITNLGGIQHEERDKVSQCDFYFMR\*

>SPBIB\_v1\_410052|ID:27164307| Arylsulfatase regulator (Fe-S oxidoreductase) [Uncultured spirochete bib]  
MKKAFFLIKPVSGNCLACHYCFYRDLEHQIIHNF GFMSSTVDILIERAFELDADILT  
FVFQGGEP TLAGLPYFEHFVKKQTCTKSNLRHQHPQINFSIQTNAIALNTEWARFFKRE  
SFLVGISIDGARIIHDTYRTHYDGS GTWAEVMHGIELLRKEGVLLNALCVVTDFAADNAE  
LIYNRLRNLGFEW IQFIPWLPPLKEESVLSSELLTPGAYAHFLKAIFDLYYQDWLHGSVV  
HVQWFDNLVAIAAGMPPE SCGMLGCCPVNFTVEANGSVFPCDFYVSDEWCLGNIHDL SFQ

SMKEGIIAHHFIERSSSIDPSCRICFAFFLCRGGCRRYREPFDDGKLNRYCTAFKEFF  
QYAGEHIMNMAAFYRN\*

>SPBIB\_v1\_410053|ID:27164308| putative Ribose operon repressor [Uncultured spirochete bib]  
MASIHDVARLAGVSAATVSRVLNSSGSVTDATRAKVVRAAMKRLGYIPNPSARTLRNNRTG  
LLALITPEIINPYFAAVASGVQDMCRKSNYQLILCNTGGDESIEISYLNLLSNKQVDGII  
IAPPGTHTNPKSDVRIRNLIDSNYPVIMIGKRFDSYVNCDIVTTNTAIGTREAMQHILD  
GGHSRIAYLGGPNPSVAKTRLATFRSSLSAHGLIIDENLIFQTNLTLEDGYNICKLLDI  
TNRPTAIFAVNDMVAIGAMIALQEAGIAIPSEMIVVGFDDIPLASIFRPSLSTVAQPKYD  
LGYIAAERLIARIDRLIENFETISLPHLIRESSMSNKTPKMMINFG\*

>SPBIB\_v1\_410054|ID:27164309|dppF| dipeptide transporter ; ATP-binding component of ABC superfamily  
[Uncultured spirochete bib]

MNDKEDQILLEVENLRKYFAVKHGVLRKKGWLKAVDGVVSFELFRGETLGLVGESGCGKS  
TTGRIILRLIKPEPNSQIFFHDNDKVIDIAKATPQELKYLRTMQIIFQDPYSSLNPWMK  
IGEIIAEPLLIHKIMVGKELTNKVHSLLEMVGLDASYAMRYPHEFSGGQRQRIGIARALA  
LNPTLVVCDPEVSSLDVSVQAQVINLLVDLQERLHLSYIFIAHDLGVVRYISRRVAVMYL  
GRIVEIGSTEEIFHNPAPHYTEALLSSMLSTDPDSSKERLQLEGDVSPINVPSPGCPFHP  
RCRYQQNKWPECVSDIPTPTSIYSDTHKVSCHFAPNLNLCGVETEGTVKIGVKNGFNT\*

>SPBIB\_v1\_410055|ID:27164310|dppD| dipeptide transporter ; ATP-binding component of ABC superfamily  
[Uncultured spirochete bib]

MEHLLIEDQLKTYFTDCGIVKAVDGVVSFSVEKGQCLGIVGESGCGKSQTALSIMGLVSK  
PQGRIVSGKILYRDKKGHITDLATLSPNGYEYRSIRGKEIAMIFQEPISLSPVYTIGDQ  
IVEALIEHTTLSKKEATHRAVELLKTGVIPAAEERIHDPHQLSGGMCQRAMIAMALSCE  
PRLLIADDEPTALDVTIQLQILRLKELQERLSMGLMMITHDLGVIAEIAIDYVIVMYLKG  
VVEKGPVRKILREP KHPYTQGLLQSRPSGTAGKVRNLNPIRGVVPSAIDPPAGCPFSTRCP  
KVLDKCSAFPFFALWEEGHAAACWLYENFM\*

>SPBIB\_v1\_410056|ID:27164311| putative Extracellular solute-binding protein family 5 [Uncultured spirochete bib]

MKSSRVVIAFLAMSAFAVVTAAAPSGTYKEAPQLAAMVQSGKLPVELRLPPNPVIVKP  
LDSVGKYGGTIRKVVYTGVDWNLALFGVRAEPLLAADLEGNIVPNLLESYEYISGGNIL  
RLYIRKGIKWSGDVFPFTVDDIYDLQTRGNKNMPLESAGLASKVVADKIVKIDDYTVLDP  
LKEKYPLEFTIAYDPTVSPKHLYIKFDPRYDSTKTWQDLATAWSPSRNSAALVNLPLVLSA  
WKVVEYVENVRIVAERNPYWYKVDNNGQQLPYIDRVVFNYVASTDTIPAMIMAGQVDFQA  
RHLSLADFPFYKQNESMGYRTAVLPNTNLGPAIHLNYADKDPDLRKLFRKKEFRIALSY  
GIDRLAISNTLFFGQAKPWGFSPLEGSPANPGNPYSTMYTQYDPSAANKLLDELGLKDTN  
GDGFRELNGKPLSIIDMDKGGGAGPVQVVELIASQWQKIGIRAIANTIDRSLILARWKE  
NSHDAFAWNVNGGVDPLQFTFAWSTTAAPDFMWGNVGVPLNEWQTSGGKTGVEPPAFVKE  
MNGLVLEAQQELNAKKRNELARHITKIASENLYKIPTTTLVSVG VVSTKLANVPNSWTDG  
ISVLSPRNIQPWQFFYK\*

>SPBIB\_v1\_410057|ID:27164312| ABC-type dipeptide/oligopeptide/nickel transport system, permease component  
[Uncultured spirochete bib]

MNFVLETGIRSPERCSCIRLKRDMGTGYILRRIGIAFVTLFFSTILIFAIKLPFGDFVS  
YAISQSGGEGGLSSIADRMRFYGLDKPAIEQYSRWIGGLVRGDLGYSFLYRQPVLKIVW  
NQMGWTVLITGLSMIFSWSIGSAIGIFSALKKYSFWDYLFTAFGFLGLSIPSFFLALIII  
YMCISAGSVVTGGLFSPEYAVAPWSWARFLDLLKHIWIPVAIGTAQMAQVIRIMRGNLL  
DVMNQPFIKTARAKGLSERKVIFKHAVRIAMNPLISLAGLSAPALVSGIVVTA VVNLNPV  
IGPTFIVALKSQDMYLAGGYLLLMMVLLLIGNILADILLAWS DPRIRFD\*

>SPBIB\_v1\_410058|ID:27164313| Binding-protein-dependent transport systems inner membrane component  
[Uncultured spirochete bib]

MWKRFFKHKIALTGLVLLFLLIIPVVFVFAEFFAPYGLNETSSNSYAAPTRIRFTDEKGFES  
LKPFVYDAQPSFDLNTGQTFWKEDTTPHYLRLFIHGSAYSILGLKLDIHLFGAEGGHVF  
IMGTDALGRDVSRLLYGGRVSLAIAFITALFALIAGSLAGIVSGFFGGVADMIIQRVIE  
LFITIPNIPLGLALAAFLPPNLPILLIAAISLVIALVMWANARQVRGKTLPLRDAVHV  
QAAVALGASTPRVLLKHIFPAIYSHLIVVVTLAIPQAMLAEAGLSFLGFGVRPPLTSWGA  
LLQDAQNFRTISLYPWVAVPGLAIAVTVLLLNFVGDGLRDATDPYLN\*

>SPBIB\_v1\_410059|ID:27164314| conserved protein of unknown function [Uncultured spirochete bib]

MNNYSIRGLEVHDWSHIWNFKTMRRYMKFMVENDMNTLVLHHVGVLDLITFPAKFLGGGT  
PTNSIFEVYNQIDQNIYRYALRENLNLYRRDFLKQLIKEARQCNIIDVYIEDKELWFSDFI  
LNYKPDLIKNGVLCSEPFWWEEFLPAKYEELFVALPDLAGVVISFSGTGESRLAIANMHS  
CNCDLCKKMPAQWHTNMILGTYGPFKNRGRKLVVRDFIYTKEEQEQFAEALKVIPQEVV  
LSLKNTPHDFYPTFPDNPLIGRVGERPQWIEYDVNGQYFGWGVVPSIMFDDIEHRLAYGL  
DHKVS GFFMRTDWEQVQDLSCFDGNLLNLYAAAILGKNPAADRREIVLRWLEGESMLDT  
ACTPMQINETLDWLLKILEPTWSIMRGAVYVNGTVFSDNSLFHV SFGQPQWVAETHHSLK  
NWFAEARDALGLTTKNVKFILEEKDRASKIMDEVLDV LALGRHALTETAYKDLLDRFELM  
KAYVQGFCL ETRLWVFGRLWVENRLDMLPGFDRPVKSFLEEFVKIKEYIASVKGMPQLT  
SYPACVLLNIERMECFIRDAEKKIMAMRPLE\*

>SPBIB\_v1\_410060|ID:27164315| ADP-ribosylation/Crystallin J1 [Uncultured spirochete bib]  
MQNYKERNSSRKRSELVFRDKVLGCWLGKNAGGTLGEPWERKFGVDEMFDVHWYSHIPE  
GGIPNDDLELQLIWFQALKERGGITAWDLAEYWLDCVMYNFDEYGLSKANLKRGLVPPI  
SGWHNNWFKNCMGSPIRSEIWACIAPGEPRIAKEYAFEDALCDHAGGESVFGEVFNVALE  
SCAFFESDKYRLIELGLASIPESCLTSRSIRDAWDMHKKGIDWREARNILKDRYSIPLAQ  
YSPVNMGFQIIGLLYGEDFGDAICKAVDCGWDTDCTAATVGAILGIIEGASRLPEKWIKP  
LGYNISTNLRTGGIRNLRAPTDINELTDQVCAEAKRVLKFWD AEAIEDASEETRDESSC  
FFRKYEFKIDRIAPYEPNVATWNLGTVSVSLRYLDSASIFSDRSTPLELEIHNPHEAIL  
IEISVLLPEKWSVEPIRQQTFTIEAYDTAKVAYNISVSDGIIEDSNRGYFIISAKNRMAL  
CAVPLVLLGGSKWLVSPLFEGKTLEDDCGIDESLVPSTMLEEWSIYWRSGNDLSPESFYR  
GKPGSVFFFNSIWSPEETEVI LGSNTGRMKIWLNGQLCHTTVQPTCLRPNLGNGGGDGS  
NYCNILHSGWNDMLIKLERGEKLL EAHVTLGKPNREYPKNLGEPCLG LRRAYFSWERGE  
WL\*

>SPBIB\_v1\_410061|ID:27164316| Lipolytic protein G-D-S-L family [Uncultured spirochete bib]  
MVIDSNILAIKEKYLKYIWNPDGVSFFPALKDGTVIVFQGDSITDANRDRSVLAPNDM  
FGLGGGYVFLAAATLLSHLPDRRLRIYNRGISGDKITTIKRWEQDTLALNPDFITVLVG  
VNDYWHISKHGYKGSVELYKETYKNLIARTMKVLPQARLIICEPFAIRCGYVDESWFPEF  
SKYQAVAFDIAESSGAIFLQSLFEVALRVQEATYWC PDGVHPSAAGAYLMASAWLNCI  
AMLDDR\*

>SPBIB\_v1\_410062|ID:27164317| protein of unknown function [Uncultured spirochete bib]  
LRKRLLLMATYSKLR TSPEMIQTGYLSQDKSLVIESVEIWNVTLLFASKMGLTYES\*

>SPBIB\_v1\_410063|ID:27164318| protein of unknown function [Uncultured spirochete bib]  
MGLSMKERQRIIAETATRYREASKKEKGRILNELTALTGYNRLYAMHLLTW\*

>SPBIB\_v1\_410064|ID:27164319| Integrase domain protein (fragment) [Uncultured spirochete bib]  
MCGKRLKVSIRENLAFLALHEEYAITDAVRAELAAISPATIDRLLAKEKQTXWXXKRHST  
TSEANHYKTKIPIRTYYGSEEQRPGYLEIDTVFHSGVTVHDEFCTLDATDTMTGWVEL  
RALPNRGQRWVKEALVDVRSTLPFRLIAIDSDNGSEFLNRQVYDWCTREQISFTRSRSYH  
KNDNPFVEQKNSQYVRQFVGYARYDTTEEF EALREVYQVLCPLLNLFPSTKLIKHREN  
ATIHKTYDTPQTPFSRVLASPFVSLRAKEQLAVRKTGYDPVVLRYRLDTARQTTPCA\*

>SPBIB\_v1\_410065|ID:27164320| Transcriptional regulator, LacI family [Uncultured spirochete bib]  
MRTSLKELAKKSGYSVNTVSRALRDADDVKASTKSLIKQLAEEMGYIPNVVAKNLR LGKT  
NTIGVVSADSSNPYFAEVILAIEDAARSHDYHILLVNTEESPEGEREAITLIERQVDGL  
LIIPVFGEDANLERLKNLSVPFLLVGRWLPGLDHSILTDEYDKAKQVTSFLANGHTHV  
LHLAGPSFVSSFDRIKGYRDAHSEAGIPVNEDLIVETDGHIEDGHRHINALIRKELPFT  
ALFAFNDLVAIGAMRALKEAGYLIPQDVEVVGFDLDSRYLYNSLSSVRIPKQELGRIA  
FESLFEHMTDPKKLYRRQTIESRLMLRETTTFENIGDSQIQGGIK\*

>SPBIB\_v1\_410066|ID:27164321| Extracellular solute-binding protein family 1 [Uncultured spirochete bib]  
MKKNRLVLALGLILIALMTVGAQKPIEISFWSLFTGGDGEFFDAMVKAFNESQNEIVMKT  
DTVKFTNYTKLTAALS AKNAPDVVVMHQDRLVNYVPNGVLMQLDEYVQKANIDLSTFSP  
APLNSCKFNGKLYAIPLDVHPLVMYYNKDLMAKAGVTKVPETLAE LISA AKA IQDKTGAI  
GIAADNTTATYKAYTLTRLFMSLLMEQNV TILDASNKRANFNNAAGVKAYQALS DMVNKD  
KLTPKQLDYDSSVSSFKLGKAGFHFN GVMVGGFESQSGLNFGVVQFPALLGKNAGWTGS  
HTLAVPVQKTTDPDRIMAVMKFIDWMTQH GEMWAKAGHIPTRTTVYSKPEFKNLPHRAEY  
ADAVKNTFAPPATHKWPELYDAISDSLEESIALNKDAKAALDQLEKKVNDILK\*

>SPBIB\_v1\_410067|ID:27164322| Binding-protein-dependent transport systems inner membrane component [Uncultured spirochete bib]

MHLAGHTKRDILFSAPYLLVYLVFLAFPVVYGIYLSFFDWNILSGKAFVGLRNFVQAFS  
DEKFKSSFFHTLQFVGLSTPILIVTGFLMALISVRPTKLGKAAESIFFLPYMFSTTVVGT  
LWAWLLQKNFGLVNQLLQAIGLKGVGWLTDPNVAMLSIVWATLWWTAGFNMILFSAGMKQ  
IPDEIYESARLDGAGKFVTLTRITIPLLKDTLLVVILQIIASFVFGQVYVMTGGGPYG  
TTRVLVQYVYETGFNYFKLGYASAMSMVLFVVLVISA VQLLASKDDVQ\*

>SPBIB\_v1\_410068|ID:27164323| Binding-protein-dependent transport systems inner membrane component [Uncultured spirochete bib]

MKKILLNMVAVLIALWLVP LLWLIIITSLKMENDVVTDHLLTFSAAPTFKNYIKALTTTP  
IKQWLLNSFFVASVTTVLTFLDSTMAFVLSRMRFRGRKALYFLVLAGMMAPFESMIIQL  
YLEFNAFKLLNTLAAVIIPRLALPVGVFILTQFFNGIPTALEEAA YIDGASRFKVFTSII  
LPLGKSAMFAVAILSFIGSWNDLWPLIAISNSAKYTVTVGIANFQGTHGTEYALIMAGA  
VIASIPQILIFLFRKNIVQGIAMTGIGK\*

>SPBIB\_v1\_410069|ID:27164324| putative Glycoside hydrolase family 2 sugar binding [Uncultured spirochete bib]

MMKEASGNRFVEDSHIFAGHPNPSWARRTWMSLDGIWTITHRATKKEIRVPFPIGSKESG  
VDFKDSGLFVYEREFLEPFLAKRYLLHIGACDYMTTVFVNGHLV GSHVGGYASFSFDI  
TSVVKPGKNRIEIRVLDSHSPFQVRGKQTFMRNAFFVWYEGIAGIWQSVWLEEVGLRYLE  
RAETSDFDFGQKLA VSVFLKPLDNKSEHIPDSSLRLRIDVKSSDGRGKEATRLLEADNGV  
FKATFGFDEFNAALWSIETPNLHPMALTLLCGNTVFDTVETYFGLREISAGKDGFKINGK  
PVFLKMVLNQGYYPGGVYTPLDYSRMAEDIRTIKALGYNGARIHEKVEAPYFHYLCDRLG  
LLTSFEMPSFYLP SKKGFRRYESELKELILRDSMHPS CIMRMLFNETWGIWGVCRKSSST  
RSFVEKMYRLAKHMDPTRPVIENSGWEHFMTDIVDFHHYLRNASLARNLYSKIRNGDEYT  
LEGFSLRRVLEFYIKNQVPFATRSVFLEKPSNADVLPLFLSEYGGFGWYDTEKKNAVEES  
IEEYTRDIVHSGLFCGYCYTQLYDVGSEVNGLMTFERNPKVDIECVRKANNWEKQ\*

>SPBIB\_v1\_410070|ID:27164325| protein of unknown function [Uncultured spirochete bib]

VRAESELGEAIIQQNSIPMLGNKSGYTLTIQRTRFFLG NLTGYLASLECLIMQMSQLV  
IISRFYFRLN\*

>SPBIB\_v1\_410071|ID:27164326| conserved protein of unknown function [Uncultured spirochete bib]

MSRRKFDKEFKVA AVRLV VDEELPVCQVARELAVHQNSLYRWVSEYEKEYGESAFPGNGSK  
IYNYQAEINRLEKRNRELEEEVELLKKFRVFLQKKKHVRF RYLAECVM\*

>SPBIB\_v1\_410072|ID:27164327| protein of unknown function [Uncultured spirochete bib]

MLKMNQIDQIKELQRQGLGPGDIASRLGLDRKTIRKYLHKEDFNQPQRVPVHPSKLDLDRW  
KPLIDAWLAEDQRMRFKQRHTAKRIHQRLCEEHAGEYDCSYPLVQRYVKARKAAQRQPGG  
FLELVWAPGEAQADFGEAEVVEAGVRKTVKYLTLTFPYSNAGFTQVFGGETAECVAQGLQ  
DIFRYIGGVPSRIVFDNATGVGRRIQQHIALNQLFLRFKCHYGFSVTF CNPNAGHEKGNV  
ENKIGYTRRNFFVPLPVVDRLADWNDGLGQTARSCGTKSRSF\*

>SPBIB\_v1\_410073|ID:27164328| IstB domain protein ATP-binding protein [Uncultured spirochete bib]

MAFSQTAVQLCEEEGTAPMEQFLKVLNRNEMASREQARRARFLREAVFSVYKTLEGFDFA  
SVSLPPALTRQELTSLQFVA AKTNLVMYGPVGTGKTHLATALGVEACNRS MRTKFFTA AE  
LVVRLSEALKEGMLDKLLASVLRADLLIIDEWGYVPVDRQGAQLLFRVIADSYEQRSLLI  
TTNLEFSKWGTIFTDDQMAAAMIDRLAHHGHILLFEGESYRMKHALMRQKDQVKSPWPDG  
EICTIFLGILA\*

>SPBIB\_v1\_410074|ID:27164329| conserved protein of unknown function [Uncultured spirochete bib]

MNSSIRFGTCSWNYP SWVGLVYAETQRRAAA YLREYSQKYDTVEVDSWFYKIPDREEVAD  
YLAQVLPSFRFTCKVPQELT LTHLRGNAGASTGVNPSFLSPDLFARFLEAVEPMIPRLD  
AIMFEFEYL GKDKMPSLEAFLEKLD DFLTA VRERARGLPLAIESRNRNYLSTAYFSFLRD  
RRLIPVFSEKRYLPHVYEVYWQYRNLVDTDIVIRLLGCDRAEIEKKTNEQWNTIHEAKPD  
KQLILQMAMDIASQGHKVTINVNNHYEGSAPLTIEVMQKIQQKLGAEKKSSGS\*

>SPBIB\_v1\_410075|ID:27164330| exported protein of unknown function [Uncultured spirochete bib]

MKRHLALFILLIIIFSVAA DQVELY YNGNYIKNFY LKDATGYSVLNLSTKSANAALTIT  
IDETYGKHNQYFLNRLYRITSISKMKDGTIFTYESLLSLSQESTSFVSYAWIMPSAQYDG  
YFSLRNSDGEILAVYFDFNLNITRIE\*

>SPBIB\_v1\_410076|ID:27164331| transposase [Uncultured spirochete bib]

MFMRITNSGKHGAYHYAQLAESRRDPATGKVKTSVIYNFGLVEQLDIPGLERLIASIRSI  
LPASSAMAQGAPQDYEFGLSREIGPVWLLDQLWKKLGIDTALASLVKEHQYRTPVERMLF  
AMVAQRIVAPGSKRSIERWLEKDVLIQGLGEVDVHRLYAAMDLLIESNEAVQHALFTHVT  
KKLDDLVDILFLDTTSTYFEIEGEDDHLGGLRKRGRHSDKNHPELAQVVVTFVAVTKGGIPI  
RAWAWPGNTSDHEITQQLKHDLSQWNLGHLVMVQDAGFNSERNRQILLQGGGDFIIGEKL  
RSGSKGEAVEALHRAGRYRTIEREGKTLCKDVLIDEGAATQRRYVIVQNPEAAQRDKET  
RSQIVVEARRRLAALAQLSGEPHRKAACRLRSHGIYGRYIGQRKDGTLFIDEKMKRESL  
LDGKFLISTSLMHCSTEEIVYGYKQLWEIERVFRDVKHVVDIRPVYHHLDDRIRAHVLC  
FIAMVLVVAERTLSMSWRDIA YTLTDIRVGHTKGPDGELWLTSPLEMQRTLFTMLKVK  
HPPKVWDFKSKKAPIGV\*

>SPBIB\_v1\_410077|ID:27164332| transposase [Uncultured spirochete bib]

MGKVTKAEVSAILQGMQDRELYEKLGLKEPWSVENVTLDLPSATVTVVAISHPKGAKFPC  
PVCGTERPIYDHQRRWRHLDTGFTTILEAEVPRIQCPEHGKQVNVVPWGEPSRFTAL  
FEAIAISLLKVASFSVARHLRISWDAASGIMERA VRRGLARREAQPLRRIGIDETSFQK  
RHEYVTVVFDQERSCVVDVLDGRKKETLKTWLAANQNALTALESVSMDMWDAYIGAVREA  
HPDGEQKICFDRFVAQYFNKAVDKVRAEEHREFKTRGEQSPLTRTKHAWLRKGPDAAF  
SSLARSNLKTARAWRIKEAAAELLRTKSHEEAARDWRKLLSMMRSRLGPVVKVAAMIRQ  
YLWGILNAARLGATNAKNEAVNATIQLKVRACGFRNRSRFRKVMVILSHLGLSLLPEVMT

\*

>SPBIB\_v1\_410078|ID:27164333| chpA| toxin of the ChpA-ChpR toxin-antitoxin system, endoribonuclease [Uncultured spirochete bib]

MVKPKKYVPERGDIVWLD FNPQLGHEQKGRPALVISFKEYNEKIGLALFCPITSKVKGY  
PFETE VKGIINGCVLSDQVKNLDWTVRNVEFIEKIEDEKLNDIIDNILLIEK\*

>SPBIB\_v1\_410079|ID:27164334| Transcriptional regulator/antitoxin, MazE [Uncultured spirochete bib]

MQTVVQKWGNSLGIRIPSVYAKEFNKLGNSVEIVKEGGKIIIPPKKTLEEMLSKVTKD  
NIHAPIETGSSLGNEEW\*

>SPBIB\_v1\_410080|ID:27164335| PilT protein domain protein [Uncultured spirochete bib]

MLNSILIDTGPLIALFDKDDTYHNKVKDFIKNAKYRFITTA VITEVSHMLDFNINAQID  
FFEWIMKEGVILQEISQKDISRIIELTKEYSDRPMDFADATLVIAAEKTGIKKIISIDS  
FDIYRLPGKVKIENVFHK\*

>SPBIB\_v1\_410081|ID:27164336| CopG-like domain-containing protein DNA-binding [Uncultured spirochete bib]

MTTVRLPIEIEQRLEILARKKHKSKTDLIREALEKLFIQEESKDSYELGEEYFGKYGSG  
DGTLSVITYKDKLKD KINAKLNSH\*

>SPBIB\_v1\_410082|ID:27164337| Phospholipid diacylglycerol acyltransferase protein [Uncultured spirochete bib]

MPISKSTNWGRKEKMITYTESLRGVSHYSLDGFCEGWQPLTPLQLRSILKHSTYRILAM  
DTEHTRIVGIITALS D KIH WAFIPYLEVIPAYQKQGIGKRLMELMIEKTKGIVCIDLTCD  
TEMQAFYEQFGMVASHGMILRRYMDEK\*

>SPBIB\_v1\_410083|ID:27164338| conserved protein of unknown function [Uncultured spirochete bib]

LANFKIAETETFEKKIQSSQYKFLYKQIQHYIYPLLRENPFYGNPKKLGGEYKEIYFR  
IGDYRLFYTISEETVIIFILDIENRKDAYK\*

>SPBIB\_v1\_410084|ID:27164339| conserved protein of unknown function [Uncultured spirochete bib]

MAKTITVRVEDTTYDIFKKA AEGQKRTISNYLEFAALNYTVNETVVDSEMKELAFEND  
IKKGLADISAGRYK VIG\*

>SPBIB\_v1\_410085|ID:27164340| Ribbon-helix-helix protein, CopG family [Uncultured spirochete bib]

MKKTNTITLRVPEELKERIENMATLQGVSMNQFALYAFTKELSELENSQYFKKYKLGKKK  
EEIKGFDDVFSKVKPRNVDQWDTL\*

>SPBIB\_v1\_410086|ID:27164341| Toxin-antitoxin system toxin component, PIN family [Uncultured spirochete bib]

MKVVLDTSVLFQALYSSTGASHAILKLIREGALQLPISIPVFEEYREVLLRQSSLDL FEL  
STNDVQKIIDFIALIGVKTDIRFLRPNL RDENDNIFIELAFASGAHYVITKNVNDFKYD  
ADLRFNEITIATPAEFMKIWRNTYEK D\*

>SPBIB\_v1\_410087|ID:27164342| Plasmid stabilization system protein [Uncultured spirochete bib]

MSAKYTIVFSRYAEDDLSEIIKYYAEKNSQYALKLLDTLETRVQELREL PARGRIVPELA  
QQNILEYRELIEGNRYRIIYVIQDSMVVIHAILDSRRNLEELLMQKLMRFYS\*

>SPBIB\_v1\_410088|ID:27164343| Prevent-host-death family protein [Uncultured spirochete bib]

MNVNPKDTIKPISYIKTNAADMMMKFINDNKSSIIITQNGEAKAVLVDIDSYQEMRDAFSL  
LKIIKLSEKDIAAGNYKESDAVFSNLRTSLSK\*

>SPBIB\_v1\_410089|ID:27164344| conserved protein of unknown function [Uncultured spirochete bib]

MNKKVFIDSDVILDLLSKRQPFYPAAAEIFTFGDYGLDLYTSSLVFSNVFYILRKSVGN  
EKAKELLRKLRLIRIPIVEKNIDMALNSTFTDLEDAIQYYSSCSFGIDVIVTRNTSDY  
KNSEELLIQSPEEFINIISIEKE\*

>SPBIB\_v1\_410090|ID:27164345| conserved protein of unknown function [Uncultured spirochete bib]

METKLTCLKLDQAIQRAKQYAEHNRSVSKLVEDYFRNLIVNRKDKTHYSPLVEELSGVI  
TPDDINNSDYTSYLEAKYE\*
