# Supplementary material for: Fermentative Spirochaetes mediate necromass recycling in anoxic hydrocarbon-contaminated habitats
Source: PubMed Central journal article supplement (PMC6052044; doi:10.1038/s41396-018-0148-3), 2018-05-30
Supplement: 41396_2018_148_MOESM9_ESM.pdf [file 41396_2018_148_MOESM9_ESM.pdf]

>SPSA8\_v1\_10001|ID:41144770| putative TPR domain protein [Spirochaetes Bin 1 SA-8]  
MSIFFKRRTSRTSSRHSKAKSVAILAVSVMMAAGVIVLLVLLFSGKASFSTLISGRRKSE  
VLASWVAGDRVSTLQCRQELEKNPLDPFYLSFNGFSAYYLAMEKQEGEERLSLLDEAVT  
SLRKS LAVDEKSPVLGQEEYVLGKAYYQKGLPWYDLSLKYLEKAKLDNYSAPDLQYLGL  
LYAASGDHGTAIKHFETALKNNPSDVLMSAALS YKESGNTAKAVEILNSAISSSSDDL  
VLKCRMMIADIEFDTGNLKKAEELYNALVKADPSLADAWFRLGVIYEAWKDPHRAAWR  
KAIAQDPNHVEARKKLSERL\*

>SPSA8\_v1\_10002|ID:41144771|mreB| cell wall structural complex MreBCD, actin-like component MreB [Spirochaetes Bin 1 SA-8]

MAIKNIFESFSQDIGIDLGTCLNTLIYVRGKGIVLNPSVVAVEKGTNRLVAVGTEAKGML  
SRTPRDIIAKRPLRDGVIADPDMTEKMIKFFIQKVVPRNWFVKPRIVIGVPSCITKVEEN  
AVIDSAYKAGARSVKVIPESLAAAIGAGIPIVEPAGHMICDIGGGTSEISVISLKGMVVT  
RAIRVGGDEFDEAIIRHIKVNHNLIIGDQTAERLKIEIGNASPRTIEKVEIKGNDAITG  
LPRRFEVDSVEIREALIASVNQIVDEVKKTLSLTPPELAADIVERGIVLSGGGALLKGLP  
KLIKETGVPVILAEKPLECVAIGAGKYFETMNSHEGSESVYESLNL\*

>SPSA8\_v1\_10003|ID:41144772| Cell shape-determining protein MreC [Spirochaetes Bin 1 SA-8]

MPRKQKKARVPFLHTTAIIMVLSLLMVSISTKTLNDFPARAFRAVGSSVQEIFYKVGVSF  
FSNTILSIQKLKNLQYNSLAEKLESYYQMERDFADTKAENERLKEQLGFYQTINTVKT  
SAQIVASEPGLYETYTINKGSSDGVQRNMAVVAFAQNGMEGLVGKIISVNSTSVVLPF  
DKRFYAAARFSRTRSAGLVNNGRGSFLDDLMEYVPRPNASEIQIGDLVVTSLGLDSIYPAD  
LAIGRVKSIETDVIGTAVTIHLDPALDFSRLEYVFVIETQKIVDNSNGEVIKSEAKP\*

>SPSA8\_v1\_10004|ID:41144773| putative Rod shape-determining protein MreD [Spirochaetes Bin 1 SA-8]

MIKSVSLASMLAVLILFIQTTWFKNGILASATPDFLLLLILWMSFSNKNIEGLLAAFVIG  
IAHDFLSSSPLGFHAFLYVVPAYVALLIRASIFIDRILMPFAAALLATILKALLSIFLAR  
LFGKGAIAYSFGNIRFWMECLMNILLAPLVFWVLSKTGKAFITKSHT\*

>SPSA8\_v1\_10005|ID:41144774|mrdA| transpeptidase involved in peptidoglycan synthesis (penicillin-binding protein 2) [Spirochaetes Bin 1 SA-8]

MNNKKSIPKTKYFKILVAVIGVVYSIYLFSLQVIQAQNFRTEALRYASQSMKLP AIRGE  
ILDRTRNVSFASNEDSFLAVIPAEIEKGLHESLFLKIAEATGISLDSIMKKIPPKYHL  
YQAIHASSVDSSAIKIAENREQFPGVYWNPPQPKRKYPAIGSMAHVIGYVGEITRDEYK  
LLYNKGYSANDVIGKAGLEKVDYVDEVLKKGKDGYYLKNVDVKGKDL SAYESKVEKPVNGKNL  
VLTIDAEIQKTAERALGQRMGSVVVLPATGEILALVSYWFDPNLFTSNKAGDEYARLL  
QDEKKPLNRAVQSSYPPASTFKTVLTAADLEEKAFPIDGKIVCKGVIDYGGREWNCWIH  
RPGHGPLDLKGALAQSCDVYYWTLGRDYLGIDTIVSYAKEFGYGAPTIDLPGEASGFVP  
TPQWKEKTYNERWTPGDTMNL SIGQGYMLASPLQVANMMAMVANS GKIMKPHLVREVRDS  
GTGALLSSVEPELLATSNIKESFLHLQEDLRGVIVNGTARTPISTKVVQIAGKTGTAEV  
GLKDRWHSWFASYGPYDAPVDQIVVVTMIEATNPWEWWAPYAANVIYQAI FGGQDVESA  
AKTVGVNIDRMNIRGRTE\*

>SPSA8\_v1\_10006|ID:41144775|mrdB| Rod shape-determining protein RodA [Spirochaetes Bin 1 SA-8]

MKTLQVPKFLSDMDYLIFTSVFFLIGIGILSIASAGVDADGFRFSNEYLKQIIWAVSGFI  
LMLLAISLDIRLKDYFIFAYLFILLILYTRFAGKVVNGARAWIGVGDYGIQSEFAKI  
ITILFLARYLDAEMESSFKRLVISSLIIGIPVLLILSQPDFGSALVFFPILIAMLFMAD  
VDKRYVYFILGTLTTFLLLIMPLAGSYFFPKGNPVELLYQRRILNVITMFSIAVFALS  
AYGWIKFKKRYFWISYFFSIFNVSIISFIAQKILKEYQIMRLMVFLNPRVDPQGAGWN  
IIQSITAIGSGGFSKGYLQGTQSHARFIPQQSTDFIFSIIAEWGFVGSLLVGLFCFF  
FYRIVLLIESTKDRYSALVASGIFGMLVFHFIINVGMAIGIMPITGIPLYFISYGGSSLW  
AAMTAVGILLGISARRYRM\*

>SPSA8\_v1\_10007|ID:41144776| Radical SAM domain protein [Spirochaetes Bin 1 SA-8]

VKKLSLINPVEAFGSQFLSIIKPARYIGGEVGSNKPAETEQRIFALSFPDLYEIGMSN  
NAVRILYNDLKTMSDSVVCERVFAPAPDFENLLKQKNVPLYTLES GIPLKQCDLIGFSIG  
YELLATNILTILDTGKIPLRVSDRGDEDPVIAGGPAATNPLPFSSFLDAVYIGEAEAGF  
YNLLKKLAEIKKSGGSRSA MLQAIADENSFWLSPESVARDPDGNMRLRKA VRAVQAEFG  
RQAKDTAYPIPVLNTIQNHGVVEIMRGC PNGCRFCHAGFFYRPQRIKPPQIQEEVRNLI

SKGGYREITLASLSSGDYPGIIELVHSLNNDTWKSKKVSFQLPSLKVESFTLPLLSELSET  
RKSGLTFAVETPVDSWQKSVNKTVEFEKITAILHEAKNYGFRSAKFYFMIGLPVPGRGMG  
EARAIVDFLLKISHVEKIAINVNIGTFVPKPHTPFQSRGQLPEAEALAAIHYYIKDSLPHY  
KFISVSYHSPFTSMLEGIISRGDERVGELLNAYRKGARLDAWEEHFDRNRWKEILLESS  
LQLGFDLEKEYLQPIPENHEPPWEREINLFVSKTYLEDEAKKSIESEMSTVCDDECDHPC  
GSCNSRFSIVNKFIQSEVRDRASMPQPEDFGYKITKTQDSILEDQRFQIVFKKTGKGIFY  
PLHSISNIFARALSILEFPVRFSEGFNPLPKMEFTQPLGLGIGSEYEVLA VWLKDIIQIT  
DSDLFIKSFNCQMPQGIEVVSVRFGKKRSAGKNSIGTLYSGSSFQISLKEKMDINLLIS  
DKFNLLKSELEKRTEVESYDEVQKNVSVYVNDSHGGENNIQHVLKDILQIENIHDECRIV  
KIQSWAQIQENDGNRRIPLEAL\*

>SPSA8\_v1\_10008|ID:41144777| protein of unknown function [Spirochaetes Bin 1 SA-8]  
LGIEYPSVRQVPGFFYSKRGIAAMRTRTMIKYPTLFGFILLCLVVISAGSCGLPKILYLY  
PPLSFYASGSSTVILVHDTKNYDALEGANQSFKGYEIFYRIYDTESKAISDISLINNKID  
IAPDSPDIIMRYAADTLKFLRMKNSSTSSQPLITIGNPENSGQFDLTLNQDSEWTISGET  
LGISIDVVRTITDSTRLSFSQKSNYLSSDSYSGTTDPSLSYAVFFAVAYAHDPETIGQ  
IVYSIPVVLSVPIQF\*

>SPSA8\_v1\_10009|ID:41144778| putative Tetratricopeptide TPR\_2 repeat-containing protein [Spirochaetes Bin 1 SA-8]  
VDKKSTAAPANAAPVEKKSLTDKINEFFTKNRTAIIA AVGAILAVIVIIGAYTLISNSV  
AENSSRAMELARTKLEQWGQESDETKKTELESAITADLDAIKKWPRTFAAQHALFTKAG  
IATANKKWEDA EKFALEAANKLPKTYLAPIALEAAVA AEEQ GKADKALEYYQKYVKTYV  
SDTPGLAHAYFSLGRLAEASSNWKDAIANYEKLTADFAASDWAKLAKDRLIYLKAQGLDK  
\*

>SPSA8\_v1\_10010|ID:41144779| Transcriptional regulator, NifA subfamily, Fis Family [Spirochaetes Bin 1 SA-8]  
MKVMTESIDPAKFALLIETSALINSNYADAKTLLTQIIIEFSARLVDAEAASLVLYQADKN  
KLRFEVAVGPRQHEL TGQSIDAEKGIIGWVIRHGKSLIVNDPESDVRFPDISRSLDFPT  
YSILAVPMKVKGILVGVIEVINKAGKRYFLEEDLKWLEYFALQAAIAIENARFLEKARNE  
IAYLSEKAQELEGVHEIVCASRIMLEKVELADRIAPSDASVLILGESGVGKELFAERIHR  
KSKRHDKPFIVNCAALPETLLESELFVGHVKGAFDVA VQDRVGRFEAADGGTIFLDEIAE  
MSLKLQAKLLRVLQKSFERVGSSQTKIVDIRIIAATNRNLEAMVEQNLFRPDLYYRLNV  
LPLWIPPLRERKEDVPVLADLFIKRYARETNKCLQGFSDTAMELMLSYSWPGNVRELENA  
VERAVVMSQDSTISPADLMLGKTADIDEFRGKNLKD AVNIFKTHFIRKALELHGWNQTE  
TAKSLKIQRTYLSRLVKELSIAQPKE\*

>SPSA8\_v1\_10011|ID:41144780|rpsA| 30S ribosomal subunit protein S1 [Spirochaetes Bin 1 SA-8]  
MDNKEVEMDAAAPARDEFQTLQEYLYKSFEGLEEGDLIDGKVVQINGDFVFDVGYKSE  
GKIPIMEFGDDLPNVGDDVKVILIKKETHSGEVIVSKKRADEKVFVKSIAVAFKEHKPVD  
GLIEKEVKGGYEVDLGHGLKGFPLSSKADIQRLEKTDILVGQTAKFYLERLYSEKKINII  
LNRRKWMEEDIELRRNEFFQNVQIGD TVKGIVKSFTSFGAFIDLGGFDGLLHINDMSWGH  
VTRPKDFVRKQEI ELKVIRLEPEEKRLNSLKHFTQDPWFTFEDKYHVNEIVKGVTKL  
TDYGAFIELEEGIEGLAHISEFSWIKKVHKPEDMLKPGDVVDCMILGYDLQAGKVS LGLK  
QVQENP WDTINEKYPAGMRLTRKIVKVTNAGAFIELEEGIDGFLHIDDYSWTARIKNPSS  
VLHEGDEIEVIVLESNPEDRNIRLGVKQLSDDPWRSFARAFRVGSIVEGTVSNVTD FGVF  
VKVQGDIDGLVKKQDLTSDRDESYEDALKKYTPGMQVKA VVIDLNPDRQKLGLSIKDLVQ  
RQREELSKFIQDEESDAGYTLGDLIKERDNSRKNS\*

>SPSA8\_v1\_10012|ID:41144781|cmk| cytidylate kinase [Spirochaetes Bin 1 SA-8]  
MIVAIDGPAGCGKSTIARMLSQNLGFLYVNSGNIYRAISLWAVEHGIPPEEGSKIIEEAR  
KLDLRYQSDGSLTMNGRKLDRERLSAEVDAVVSQISAIPEIREIVNMIVHESAKGRDAVA  
EGRDITTVFPNAEVK FYLDASVEERARRRLNEHVSNQNEDEIIRNIQMRDQIDKTKPVG  
ALKIAEDA EYLDTSGLTIEQVYEK VYSKILYTREAHGQ\*

>SPSA8\_v1\_10013|ID:41144782| Pseudouridine synthase [Spirochaetes Bin 1 SA-8]  
MAEEKKRLQAYLAAAGLGSRRACEKLISGRVKVNGKPAQLGQSVFPGDEILLDGKPVIIH  
QEIKHYILLYKPRGYLSSMKDPEGRAL AIDLLKDACPERVYNVGRLDQWSEGLLLFTNDG  
NLALKMVHPSNNLEKEYEVETDKDLPSDFKLR FENGVDIEGVRYTAKSVSVTGAKNARIT  
LIEGKNREIRR VLEFFGLRALS LKRV RIGSLVIGNMQPGEYRKLSDAEIQSLQKSFKPNR

GGSFNDSSN\*

>SPSA8\_v1\_10014|ID:41144783|scpB| Segregation and condensation protein B [Spirochaetes Bin 1 SA-8]  
MEIEETALVGAVLFLESEPIDDEKGISRITGLDEAVVAEALQQLCVEYENEIHGFAPMRS  
AGGWILAPKVTLEWKLKDHYGKKNETKLSKAAMETLAIAYSQPVTAEIEAIRGVSADG  
MMRFLARGLIQEVGKKDIPGKPMQYGTTFEFLKYFKLASIADLPRLELENSRFSLDES  
EKG\*

>SPSA8\_v1\_10015|ID:41144784| Segregation and condensation protein A [Spirochaetes Bin 1 SA-8]  
MNTSTTYQTESGMTVPSAQFHEHQENRRNFRLKDFEGPLDLLLFLIKRNDMSIYDIHIA  
ITEQYLECLNSEEDISLDELSEFYNLAAATLLLIKSRMLVPSSEIEDDDDFEDPRQGLIEKL  
IEYQKFKKLSTLMEQREMEVEWTLERSMQRTPFASAEAEADVWMDIDAWDLLRTFSSLV  
QNFSSERIIDMYEISINEKVALILEKLDKNQSLSFTELITRPRSALDLACAFLAILES  
V  
KNKLITIKQHKLFGDIRIFKRNSEVMHGN\*

>SPSA8\_v1\_10016|ID:41144785| 2-amino-4-hydroxy-6-hydroxymethylidihydropteridin epyrophosphokinase  
[Spirochaetes Bin 1 SA-8]  
LESVRVFLGFGSNIGDGIANIQNAACEIENRTGSSVRLSGFWRSKARYYLEQPDFINAVG  
EIRCCLGAEELLALCNAVEAEMGRDRSLVAEKGPRVIDIDILLYGKEIIASDRLIVPHPG  
IRERKFVLLPLMQLDSTLQDPVTGTFLQDILSRIPRQGIYPILSQRYDAPYPA\*

>SPSA8\_v1\_10017|ID:41144786|recA| DNA strand exchange and recombination protein with protease and nuclease  
activity [Spirochaetes Bin 1 SA-8]  
MARKSAAAASLDNDTGIPELSSQKGNASADNSEKLEKALEVARLHIEKQFGQGSIMKLGAAH  
ESSQGIEAVPSGSILLDEALGIGGYPRGRIIEIYGPESSGKTTLALHAIAEAQKLGIAA  
FIDAEHALDPVYARNLGVLDIDELWVSQPDNGEQALDIAESLIRSGAVDIIVVDSVAALTP  
QAEIEGEMGDSHVGLQARLMSQALRKLKLAGTLAKSKTILIFINQIRMKIGIMFGNPETTTG  
GNALKFYASVRLEVRKVKETIEKGDADAIGNKVRVKVVKVKNKVAPPFRRAELEIMFGKGISR  
SGSLLDAAVKYNIIEKKGSWYTWGEEKIGQGRENKLFIEQNADYAEKIEKLVREKIFEK  
PASASSSDSTSKTGQIAAEPRPELNPKSENQDVITADDLF\*

>SPSA8\_v1\_10018|ID:41144787| conserved membrane protein of unknown function [Spirochaetes Bin 1 SA-8]  
MKHQPELFAVYRILFNKDIDSGKVTRKRSRLSRGSFGGAVLGIGISLIPLIIVLLVSDGM  
IEGITNRYMETKTYHLQIALPLEAGKDAREIMSALQDAFPGRFFEERSGPAVAVAGSEN  
HSVYLRAVDQSFCDPPTIRYVRIEDGFEFGFSASKSIVLGKPLAEALGISVGDTLTVLTP  
RKAEPGDSEHLESIANYQPKLSFYRVSGIISGYHELDAQLAFIPLKEGEKILNFAGASS  
FIGIKTDKPYGKELEIARNKIAAIVSQIGLSWFEPVFLRSWIQIERSLFRSFEVTRSTLL  
FIMAIAIAVAAINLSSALLTFVADHTTEIAIFRSYGASSRSIGAIFLWAGTLTGA VGTFFV  
GMVLGITISIFINPIIRGMEWLVNSLNVLFALLAGQPALPVKLLDPSYYLEKIPVTVNII  
EIGIISTASLLVCIMASLIPARNASKISVLELFRKT\*

>SPSA8\_v1\_10019|ID:41144788|lolD| outer membrane-specific lipoprotein transporter subunit ; ATP-binding  
component of ABC superfamily [Spirochaetes Bin 1 SA-8]  
MNEIFCSNVCKSFVSKAERLDVLRSLDLSLPASCTCAIMGASGSGKTTLLSLIGGLEGFD  
SGEIQVGVHKLHTMDEKLAIRSETIGFVFQFHILLKDFTALENVALPAYLKGAEKKKA  
WEKAEALLEKVGADRKNHFPSELSSGERQRTAIARALVNDPILILADEPTGNLDRHNAE  
SVAELMFRLPELSGATVILATHDEALARRAQFVFRSLSGSLEAV\*

>SPSA8\_v1\_10020|ID:41144789| conserved membrane protein of unknown function [Spirochaetes Bin 1 SA-8]  
VKPGPLLYVARRWGYSSRKKASARRSMLASAGIAAGVAALIVVVSIMGGLQKGYIDAILE  
ISSFHVRVVLSPDTPISASEKIKNVGGIVSVLPFQETTMLAAGPGRKTATMLIRALPDD  
AAERDPSMMQALNFKAIETSLSDTRIFMGSEAAFLGIGEGDSLELLNIVSDDQSGILPF  
STAMQAGPMFRSGYYEFDSGMAFISSKSFLAASMKGKPVVLGIKLNQKYRDFQAKNQIAA  
ILGSDIVSIQTWREYNRSFFGALRTEKTVMMMLLVGVIFLVGMNIFHSMRRTIASKMQDI  
AVMKSFVGLGGELNSIFIMEGLEIGILGALAGFAAGMILSSNINEIIRIFLNLAANLAAV  
FQSLGLKISQYTYQRLTTSYFYLDKIPVSITSFEIFFIIASAIASSVFAAFLASGKTALA  
RPSEVFRNE\*

>SPSA8\_v1\_10021|ID:41144790|ftsY| Signal recognition particle receptor FtsY [Spirochaetes Bin 1 SA-8]  
MGFAEKLKNFFKRSTLDDTVYDDLADLLVEGDIGASFAFDLTDRLRMQCKKQKVEDVETA  
RKILKDLLRQYAVKTDFLDSSNLNIVLLLGVNGVGKTTSCAKLASVMMKKNPGSKVILA  
AGDTFRAAAVNQLKIHGERLGVVVAQHQAADSAAVLWDSIEAAQSDKASLVIADTAGRM

HTRQDLLKELEKMDRIIEQRTNSANYRRYLVLDTTGGQNGIRQAETFSGAVKLDGVILTK  
YDSTAKGGMILSLARQFGLPTVFIGTGETYKDFAPFDPEQFLNDFIGI\*

>SPSA8\_v1\_10022|ID:41144791| protein of unknown function [Spirochaetes Bin 1 SA-8]  
MAVLLQLMRKTIQLNSKRYGKLIILIYLVFEVFFSYAQSPAKKIGFASYFVSNSSLLDSL  
EKSASMAEFCQISAAMEGSAVQKTNPLAMTLPALMRDALRGMQRGNSRLAVSPFEARFLD  
GNFFSVNELLKEAEKLQNLDDGIIGGAFLVKDSKVDIISFYQEVKTSQFFIHRVFDVFSI  
EEFPPTVLASFSKLLWSQVYSREELKSALRSSSGTDAEAVQLIQVSQDILAWQFKEAHSI  
AQKKLTA SMSRTIVSIPVTLTLLFGFYQGYREAAFRNSDFTAASNFFLGTALAGSAVSLGF  
LVDTFINLRQLLRTSF\*

>SPSA8\_v1\_10023|ID:41144792|prfB| Peptide chain release factor 2 [Spirochaetes Bin 1 SA-8]  
LTYGGVFDAASLEQQVAEKEKLTESPFDWDAKAGKLYAQIKQIKDRIEIWRSCLTDIV  
SLEEYELALAENQQDFEAEIQETLNALRERFDQAVVLELLSGEADSTDA YIAIHAGSGG  
TEACDWASMLLRMYTRWAERRNFKTEVVDILEAEGGIKSATLQISGSYAYGYLKGESGVH  
RLVRI SPFDANARRHTSFASVYVLPVLDSDITIDIRPEDIRIDTYRSGGAGGQKVNKTDS  
AVRITHLATGIVVTCQNERSQYKNKDVAMSVLKSRLYEYYRQEKEKENS KFQSDKKEIAW  
GSQIRSYVFQPYTLVKDHRTKFSVGNVQSVMDGDIDPFIESFLRWKWNGGTVA ADEEDDS  
IE\*

>SPSA8\_v1\_10024|ID:41144793| Aldose 1-epimerase [Spirochaetes Bin 1 SA-8]  
MSVEKKYFGTLADGSDVSLYILKAGRFQAAFSYDYGATWVSFLMPDRNGVIEDVILGFSTL  
SPYAAKHPPFGSTVGRFANRIADARFKLDGKEYQLFANNGTNHLHGRRGFDKVLWSASI  
FESENAVRF SRKSPDGEEGYPGNLTCQV FVSLSDGRLKLRYTATADARTPVNLTNHAYF  
NLEGEKGTILNHILTLNASRYLPVDSRQIPLPGAPLTVESGVFDFRKP KRVGADMSEL  
SGYDHCYVIDRGETTSIMECAAISAPISGRRLKVSTTLPGVQFYTGNNISSLTGKQGSY  
DKYSGFCLETQYFPDSPNRDDFPSCILSPGQTWEHETECFSIS\*

>SPSA8\_v1\_10025|ID:41144794| conserved protein of unknown function [Spirochaetes Bin 1 SA-8]  
MKQDQKVDQIPIALVTGATSGIGKAVAIELTERGYK VYGTGRMPPQPGKTDEHGIVFLAM  
DVLSETSVTEGIGRILEKEHQLDVLIACAGMGIAGSVEDTSMADLQMRNFTLGTVLV  
KTCLPIMRQQKHGKVIIGSLAGRIGMPYQAFYSSSKFALEGFTESLRHEVKPFGIDVCI  
VEPGDFNTGFTAARKKFGISGSPYSKAFLRTISIQEHDETHGAAPSIAARAVAGILEKKN  
MPLRLVVGPFVQKFAAGLKRIIPAKLFELLYKIYYRL\*

>SPSA8\_v1\_10026|ID:41144795|cmk| Cytidylate kinase [Spirochaetes Bin 1 SA-8]  
MEPIIIAISGKSGCGNTTVSRLVAEALGLKFINYTFRALAAEKGLALADILEKADKPAW  
DRLLDARQIELARQGNCVIGSRLAMWLLPEATLKVYLKASQSARVDRIHQREGGDKEALA  
RFTAERDARDQRYKEIYNLDTDDISPAHLVIDTERWTPKQISHIIVSAVGEIDMIL\*

>SPSA8\_v1\_10027|ID:41144796| conserved protein of unknown function [Spirochaetes Bin 1 SA-8]  
MFTSMTGFARREFKTDIISGVMQVKSYNRYLDVAISLPPQLSMFEPLFQQALVENIRRG  
KIEFNLRVKSFSYPISVQPDTSAAKAIYSALAEIGKSLELTEKPDALAIAGFDGVLQYDR  
EVDVDIVWQSLRPILDELIAEFNEHRTREGEATQTNIFSELERFASMLAIIRQHASSMDE  
MIKNQLRERFAELLPNGYDEQRLLEVA VQLVRLTINEE IARLEAHIAAFKIVSAEQMPA  
KKLDFLCQEMNREVENTIGSKNILIPVSHAVIEMKDALENIREQLKNIE\*

>SPSA8\_v1\_10028|ID:41144797|murC| UDP-N-acetylmuramate--L-alanine ligase [Spirochaetes Bin 1 SA-8]  
MIQQFPENLNSARFHFVGIKGTGMTALAEILVRAGA QVSGSDVPDVFYTDKILSSLGIPV  
YENFSEKNVPADVTTIIYSAAYNPATNPELLEAKRRCLSLFSYPEALGALSRTMISAGIA  
GVHGKTTTTAMAGSIMAQASFPATILAGSAVASFGDRCTMSLGNRYFIAETCEYRRHFLN  
FSPA VIVLTSVESDHQDYPTYDSILEAFVEY GQRLPKNGTFIYCNDDPGARKAAECLRE  
DRKDLNFIPYGFSA S GDFS VQSSRQE EGR TAFRLGLFSEEF TLHVP GKHLVLDAAGAI AV  
CTTLYKIENPQTTAQELQSFLLSAQ TALA AAFQGSRRRSEVIGEAGGILFLDDYGHHTAI  
KATLEGIKAFWPSRRLVDFMSHTYSRTRALLDSFAESLTPADAIVLH K IYPSARETPDP  
ELNGRTLLKKVEELPMPGKWSFLLYTEEPMDALDKLETLLKPGDLFVTMGAGDNWKLGRA  
LYEKLAERTQ\*

>SPSA8\_v1\_10029|ID:41144798| putative 4-alpha-glucanotransferase [Spirochaetes Bin 1 SA-8]  
MQGTKVIFGTYN SMPHG I SSRIFERTY QNSWRPFLSGLYKFPTIHAVLYYSGTVLQWIEE  
NHPEFM LLEEM LGKKQIELLGGPYFDPLYPVIQPGDRLGQIEMLT TYLRKAFGKRPSGT  
WIPEYSWDASLPSVFRNSGLSYSFLPLKLLD TDNGSDTVFKPRIT EDQHKLFIYFPVVD

IEEDLETIASFEDIVQNQFSSNPPLISVMLRGS AIPRMWEV SGLASPDVLF EKTFAWF  
QKNCLIFETITA QSYMKQVRSGLFYLSPCASSRMINKIASPIKQNSYCNANPVRKLIMQ  
NPYSKRLFDKMYMHAIMNLLRGDKTRKKVAMEELWKGQNGNAYWEGDFGGIKRPEIRAR  
AYHALIHAEKATRAHGSFSPGLVFDDIDCDGESEAA YQANDYNCYVSNKGA AVFELDSLK  
SKHNYCCTYSSNMLIPPECLRDKFYALGSFLDEQLDMSKLQYSLIEADKNINRVVFCKEI  
SLRQGDSIHPLFLRKNYLFQKHVISVDYEIINRSTTAIQFRFGPEIRFQLALDMRDLEFF  
RYESHDRIPAEAESLEFQSIAFLSYNNIFKENLELRSPKNTWFSISHSIEELPPSDEY  
NTFAVMPYPYTEAQSDFAQVHERIYQGTVIKTGWDAILPPDSASQFSLSIHLHT\*

>SPSA8\_v1\_10030|ID:41144799| Integral membrane protein [Spirochaetes Bin 1 SA-8]

MNTISKPPFSALIANPIFLSALISLFIAQLVKAIIVLLKVRSRKELEEEXKETXIIFLWR  
TGGMPSSHA AVAVAITTSIAIEEGFSNLFILAFFITLIVIRDALGVRSSGLQAKTLNRL  
GQELASRLGIAYSALKEVHGHTWPEVIAGAMLGLGIAICMAHIIA\*

>SPSA8\_v1\_10031|ID:41144800| Pseudouridine synthase, RluA family [Spirochaetes Bin 1 SA-8]

MESTIFQATPNDHGRRLLDRILRKLKLNQSLSFIIYKSLREKKILVNGKSAVPDYRCQSGDF  
IEIFLSIHASLPVSVQPEDQOKETADRLKNMILLNTADLLILNKPRGILAHDGKDSL DAL  
VQAFYQSSHPEKSLAFKPGPLHRLDRNTSGIITFSQSIEGARQFSAGMREGKLLKTYLAI  
LDGCLSEPESWTDTLERDEKQKTTVLAEPLSNNLSKSARTDVWPLACHEGFTFAAIRLFS  
GRTHQIRAHSSIHGYPLSGDRKYGSRTNLQYYFLHAWMLDLSFLKLPMLPEQIQAPVPPE  
FLFFLSKRLLCLSEKEVYSLLSYAKNF\*

>SPSA8\_v1\_10032|ID:41144801|hflK| Protein HflK [Spirochaetes Bin 1 SA-8]

MPGTVFKPKIPKINLKGSTIIIGLIIIGVIAFLSTSFIIVDQTENA VITTLGRYTKTVGA  
GLHYKLPLGIQKAYLVQTKIIQTESFGFRTIKPGVVTVQYSNKKYPEESTMLTGDLNIVDV  
EWIIQYRISDPKAWLFNVSDRNKTIRDISQSVMNRLVGDRSILGVIGPDRQTIQDSAVIL  
MNEILHQYGLGIDIVVQLQNVPPQGVQDAFEDVNKAIQDMNRLINEGKEAYNAEIPKA  
RGQADQTLIAQGYATERVNKARGDVARFISVLDEYRKSPDVTRKRLYEMIDEVFTGAE  
NVELIDKSLN NFLPIKNLQNSSGVTK\*

>SPSA8\_v1\_10033|ID:41144802|hflC| Protein HflC [Spirochaetes Bin 1 SA-8]

MKKSILILII LAIVIGGVVIAKPFILNEGEQAVIVRFGRIVKVHTEAGLKFKSPFVDEI  
HKFPKRLMSWDGEPQRIPTKENQFIWIDTTARWRIVDPTK FYESVSTLENA YGRLLDDVID  
SAVRTVISSNYLREAVRNSDEILKSGKAETFQGTGDEGSTSLEQLTISQTQYEKIEKGRQ  
VLSSEMKTLIAGIAPSGIEVLDIIPRQIKYSEELTDSVYQRM IKERNQIAQAFRSY GEG  
KKAEWLGLKLDNEKRSILSSAYAKAETTKGKADAEATKIYAEA YGRDPSFFFEFWRATESYK  
RTMPNFQKTMSTSM DYFKYLYSPTGR\*

>SPSA8\_v1\_10034|ID:41144803|ybiT| putative transporter fused subunits of ABC superfamily: ATP-binding components [Spirochaetes Bin 1 SA-8]

VITVTDLSMGFGERSLFDKDVNLKFVPGNCYGIIGANGAGKTTFLKILAGEIPYDRGTITI  
SAHSRLATLKQDHFAFEEYRVLDTVIMGYEKLFKVMQERDTLYAKEDFSEEDGIKASELE  
AEFAELGGWEAESQAGILLSGLGVDERNHEKLMRDVDES VKVRVLLAQALFGNPDILLDD  
EPTNGLDLESIAWLEEFIEFPNIVIVVSHDRHFLNSVCTNICDIDFGHIRMYAGNYDFW  
YRMNKILVQQQKDEKKRREEKSRDLKDFIQRFASNASKSRQATSRKKILEKLEIDNLVPS  
SRRFPYVSFKPAREIGNNVL RVVNL SIPGEARPLIEDFSLTVNRNDKIAFVGHEHLAKST  
LFSVLAGETAPLRGEIYWGQTVQKGYFPKDSSQLFDSDLTIVEWLQQYTDSDDETYIRSF  
LGRMLFSGDDALKPVRVLSGGERVRCILSRLMLISANCLILDEPTNHL DLEAITALNDGL  
IDFPGVLLFASHDHEFVDSIANRIIEICPGGIIDRYMSFDDYMGDSQVKELRDQYYHGHV  
IVEI\*

>SPSA8\_v1\_10035|ID:41144804| Basic membrane lipoprotein [Spirochaetes Bin 1 SA-8]

MKRTLIVVLALLSILVVSCGNNQAKAKAPAMPTTRLLTDATGIDDKSFNAAAWRGILSFY  
GDSWENQAQKGLYDVVTAQTQDMYIPNLKQASDEKYDLVIVTGFTWADALGEVAPKYEK  
QKYLIVDWDVWGKPNVMEATFSEHEGSYLVGVAAALKAQADGIKNPKFGFIGGVPGPVIT  
KFEMGYVQGIKSVLPNATIVDYYANDWGKPELAKAQAKNWYDSGVY AIFSAAGGTGNGTI  
AQAKEYRSQGKNVWAIGVDS DQYEDGIYAEGKSAVLTSM LKRVESATKYALEQVKANTFK  
GEVVVFDTKADGVGFSKNS ELGADIVAKVNEAKAKIISGEIKIPTYAEAKQAGVVPGN  
LQASDNQ\*

>SPSA8\_v1\_10036|ID:41144805|yufO| Uncharacterized ABC transporter ATP-binding protein YufO [Spirochaetes Bin

1 SA-8]

MEDFAIEMLGITKAFPGVVANDDVTLRVKDNEVHAILGENGAGKSTLMSILFGLYQADSG  
TIKIRGKEVRITDPNHATRLGIGMVHQHFKL VHN YTVTENIILGSEPRNRFNGNTDVKSAE  
KRVSELSRLYGLDVPDPRSTIDSISVGMQQRVEILKILYRNADILIFDEPTAVLTPQEIDE  
LMKIFARLKQEGKTIVLITHKLREIKQAASRCTLVRRGKAIGTVDVAEASESEMAMMVG  
RDVKFSVDKAACNPGKVILEIKDLTVRNNRGLPAVKNLSLNVRSGEILGIAGVDGNGQSE  
LVEALTGLRPAEKGTILVNGKDITKTSIRERISAGIGHIPEDRHKHGLVLDLFRDENLIL  
KTYQSKNYAKPFGVLDPKPVRENAERLIAMFDIRAGQGPATKAKSMSGGNQQKAIAREI  
DLSPDLLVISQPTRGLDVGAIENIHKRIVEERDKGRAILLVSFELDEIMALCDRIAASK  
GEITGIIDQVEAEEHEIGAMMAGIHKTASPKAASV\*

>SPSA8\_v1\_10037|ID:41144806| ABC-type transporter, integral membrane subunit [Spirochaetes Bin 1 SA-8]

MKKNNTSFIYKALASDAYVSIFVVILGFLGTILVVIVGKNPAGMYQAMLQTLTGLDITR  
GVWNSRYIGEWLTASVPLILCGLSMGFAARTGLFNIGAEGQYIMGLTVAQFVALYFPAVP  
FLHWLVALLAAGLAGALWGGIVGWMKAKFSVSEVVATIMLNIAFFFSRWASMQIPGANT  
YKTPNFPETARLSSPILLEMLTNGSRLNRGLWVALFCVLIYWFVIEKTKLGFELRATGLNK  
EAARYAGIKVTRSVTTSMLFAGMFAGLAGAAVALGSFNYGRVLAGYDNYGFNGIAVALVG  
NSTAGGTLASGLLFGMLASAQPLMQSRQIPKEITWIISGLVVVLISLRAGVKMFLDWRAR  
KLAKELKEANHE\*

>SPSA8\_v1\_10038|ID:41144807|yufQ| Uncharacterized ABC transporter permease protein YufQ [Spirochaetes Bin 1 SA-8]

MNSLIAMIPSVLMIVSPILITAIGGMISERAGVVNIALEGLMGIGAFATAATVHYFLEPST  
QLSVPIALSAGLAAGLVFSLIHALASVTLNADQVISGTGINLLSTGATAFLAQIIFKMER  
TAPFRLGMMPGLWGIYPTAWIALVIVLISWFILYKRPFGMRLRACGEHPQAAASAGINVR  
KMRYIAVMISGALAGLAGGCLVLTQTIQYTIYTINGAGFIALAAVSFGRWLPKGVAGASL  
LFGTAVALAIYMVNIQSLRFLPSEFFSVMPYIITLITLILFSGKEYAPRAAGQPYERSGS

\*

>SPSA8\_v1\_10039|ID:41144808|deoD| purine-nucleoside phosphorylase [Spirochaetes Bin 1 SA-8]

MDNSFFHQIEERGLAHFSNGTPHNTAKIGDIAKLVLMPGDPLRARFIAETRLSDVRQINA  
VRNMFYGTGRYKGDVTVMGSGMGGPSMGIYSFELFAFYGVEQIVRIGTCGGMTDAIDVG  
DLVIAMTASTDSNYAHQYNLHGSFSPCADYGLLEKAVTSARKRGIKFWTGGIFSSDVFLS  
YSALPPEEGWKKWADMGCAATDMECYALYCNAAYLKRRALTLTCSDSNISRKEMTPIER  
QTALNGMFDVALDLL\*

>SPSA8\_v1\_10040|ID:41144809| Rieske (2Fe-2S) domain protein [Spirochaetes Bin 1 SA-8]

VVLGSWQLKDKPLGVTRLGGKLVFYRTRKGGKPVCLADKCAHRGVALSIGKLCHEHTIQCP  
FHGLEYPDAGKCTIIPANGKNTVPNFKVRSYHTFEDHGFIWIWWGDSAPSPEKPEFFD  
DIPEEAKYANSIDHWNHAHYSRVENQLDCVHLPFVHYNTIGRGNRTL VNGPGIEWVHKNK  
FFMYVYNEVDRGQTPKKNSEVPIPSPSRYKIEFLPNLWENRIDDKVRVVAAFVPVDEEN  
TLLYLRFYQAFARVPGIGTLIAKSAMPFNLFVAHQDRRVVITQRPKASALASGEDLFQGD  
YPIIQYRKRRNELKKLAGLEE\*

>SPSA8\_v1\_10041|ID:41144810|tyrS| tyrosyl-tRNA synthetase [Spirochaetes Bin 1 SA-8]

MNKALETLKARGFIQCTDIEGLSKVMDEGPVTFYVGCDDPTGPSLHIGHMVPFFALRHLR  
DAGHIGIALLGGGTARIGDPSGKSEMCKMISYEDIDRNADLFKTQLDRFIGFDGKHSFTA  
NNKDWLANLNYIEFLRDIGKHFSVNRMLSFEAYKIRLETGLSFIEFNYQLLQSYDFLQLY  
KRHGCRQLIGGDDQWGNIVAGIELIRRVEQAECFGLTFPLVMTSDGKKMGKTEKGALFLD  
PAMTSPYDFFQYWRNIQDADVERFLLMFTFLPVDECKKLAAGKDAEINKAKERLAWEVTA  
LIHGKDEADKALSAARAAFGDGGNADELPSVTLPAKRLETGIGVLDLDFVESGLACSKSDA  
RRLVQQGGASVNGVKISNETATISTEDLDEGILFLRAGKKRVCRVIVQ\*

>SPSA8\_v1\_10042|ID:41144811|hupA| HU, DNA-binding transcriptional regulator, alpha subunit [Spirochaetes Bin 1 SA-8]

MADKATAMTKNELVSALAEKTGLTKKDAKAALEVLAQIAYKEVKKNKKFTLPGFGILKVS  
KRKARMGRNPATGESIKIPARNVLKFSVSKACKDAVL\*

>SPSA8\_v1\_10043|ID:41144812| Selenium-dependent molybdenum hydroxylase system protein, YqeB family (fragment) [Spirochaetes Bin 1 SA-8]

MDSVNVFAHAARLCSAGVNFAITSIVQARGSTPRASARMLVEENGTICIGTIGGGLES MV

VKDALECIKHGTS AVKTYVLTSCSSTNESPIQEAGPYS D TARLDMNCGGTVDIAIDVVAG  
RRQLVIIIGAGHVGLALANLADMTGFSVVVDERPALASKERFPMAAAIYSNADLVKAIHQ  
VPEQEQIVVIATHSEDERALRTMVSRKWAYLGM LGSRRKV KLLLEK LAGEGVP AEILAK  
VHAPIGLDIGSETPEEIAVSIIAEIMKTASGTSGLSLSEKETV\*

>SPSA8\_v1\_10044|ID:41144813|glyQS| Glycine--tRNA ligase [Spirochaetes Bin 1 SA-8]  
MGDTQVTMEKIVSLAKRRGFV FQSSEIYGGQAGAWDYGPY GIELKNRIARFWWKEMTQLH  
DNIVGLDAAILMHPRVWEASGHVENFTDPLVDCKKCKMRFRADQIPEENLASKTCPECGG  
ELTDTRKFNLMFKTNIGPVDDGSGLIYLRPETAQGIYVNYKNIVQSNRMKIPFGIAQIGK  
AFRNEIVTKNFIFRTCEFEQMEMQFFVKPGSDVEWFNYWRDQRWNYK KLGVNMEKLRWH  
QHGPGLAHYAKDAYDIEYEFPMGFKELEGVHNRSDYDL SRHQQYSGKDLQYIDQDNNNE  
RYVPYIIETSAGLTRQLMLLCDAYEEQKVADKGNDDDYRTVMHFHPIVAPVTVAVLPLM  
KKDGLAELAQEIRGDLKEDYATDYDQAGAIGRRYRRQDEIGTPFCVTIDYQTKEDGTVTV  
RDRDSMEQVRVPCPNLSDFIKTKIKEYKRQA\*

>SPSA8\_v1\_10045|ID:41144814|glnS| glutamyl-tRNA synthetase [Spirochaetes Bin 1 SA-8]  
MSEQKEESGYSDFIREAVAKDLKEGRYKEVHTRFPPEPNGWIHIGHAKAIFVDFEVAAS  
FGGKCNLRFDDTNPEKEDMSYVEAIKRDVKWLG YDWEDREFYASDYETL YELARKLIRK  
GLAYVDDLDEEQIKEYRGTNVPDKNNITYTPPGKNSPYRDRSVEENLDLFARMRAGEFPD  
GSKTLRAKIDMAHPNLLMRDPVMYRIRREPHYRTGTQWCIYPMYDFQHPLSDAIEGITHS  
LCSLEYEIHRLPYEWFVSNCEVFPSRQIEFARLNLTHTVLSKRWLIQLVREGKVTGWDDP  
RMPTIAGMRRRGYSPGAIRDFLGRIGIAKTDXMVDIQLLEHCIREDLNKKASRYMAVLNP  
VKLIIDNWPEDKVELLDAVNNPESPEAGSRKIPFSNVIYIESEDFREVPPPKYRFLPFGN  
QVRLRYGYVITCTGF EKDPETGRIIA VHSEYDPDTRGGDAKDNRKVKGTIHWVSAKS AVP  
FEARLYDHLFEPERPMDVAPGHSFMENLSEHSLEVIPKAFGEPAIAAIPVGETVQFERIG  
YFCKDPDSTRDSA VFNRTVGLRDTWAKIEKKS\*

>SPSA8\_v1\_10046|ID:41144815|glx| Glutamate--tRNA ligase [Spirochaetes Bin 1 SA-8]  
MEVRVRYAPSPTGNQHIGGVRTALINYLF AHSTGGK FILRLEDTDRTRYSEEYVRNLYDT  
FKWLG FYWDEGPDVGGPAGPYVQSERFDLYRKYAEQLVQMDKAYYCFCDEDRLQKLREEQ  
QASKTGEQGYDRHCRSL SPEEVKEKLEQKTGYVIRL KIPLEGTTVFHDSLLGRIEWKNSD  
ISPDVLLKSDGFPTYHLANVVDDHLMGITHVMRAQE WIPSA PLHKIMYDAFGWEQPELC  
HLPMLV LGQDGHKLSKRHGATSLNEFRKAGYLPEALINYVAQLGCSYEDGRDLYTLDELEH  
LFKIEKLNKAPAVFDYQKLEWFNGQYIRQKQDAELS QLVRPFLIDAGLRKESDPGADALE  
LKAMVLVKERLKLSEAPAMMAYLYKKPQLPEAKEFLPKKLDLAATIEM LKRDLLVDTI  
DFSDILKAEAFKEYSVREGVKLGDLLMPLRVAVTGARVSPPLFESIGILGVEEIKERIQ  
VAIEWLSKALEQSGTAEA\*

>SPSA8\_v1\_10047|ID:41144816| membrane protein of unknown function [Spirochaetes Bin 1 SA-8]  
MENPVENPNLQDSNLEDSNLEENKNKPPSVLPGEQIADKTGTKIVKARKIFS FIVIFSAL  
VSVAVLILFNTGSESSLPFWTLQTRTQALLAAV VFFVLMTAGKFFIGLYYRIFKLEKTSW  
MNLAGLLVLVAISLVFLLASIVITLAKGYVF\*

>SPSA8\_v1\_10048|ID:41144817| Histidine triad (HIT) protein [Spirochaetes Bin 1 SA-8]  
MEYFFNFNKLGYLKGKRPAGCILCLVGTGSDEVENLIVYERGTMLVSLNLYPYNPGHLLV  
FPKRHCIDVRQLTDEEKSDLFNTQDKCLGVLD SLYRPAGYNIGFNMGLAAGASIEHLHMH  
IIPRYSNEIGIAELLGGKKVLVQNPLETREL LKAFGS\*

>SPSA8\_v1\_10049|ID:41144818| putative Thiamine pyrophosphokinase [Spirochaetes Bin 1 SA-8]  
MNCLVITGGDAPKAETLRLLSARCQLVIAADSGIDTAVSASIIPDVAVGDFDSTAYSIA S  
IASQGVSVVRYPEDKDDTDTEIALRLAREKGADYIILAGAGGGRLDHL LAVFTIFSRRFH  
PDEWQTKEDSIFCVPIGMTKHFRAAEQSFVSIFPLGESSAGMRSKNLKWALDGLIWDGRS  
FGISNRCVGPFEFSVTAGTCPLL VITPSGTESF\*

>SPSA8\_v1\_10050|ID:41144819| tRNA adenylyltransferase/tRNA cytidylyltransferase [Spirochaetes Bin 1 SA-8]  
MRLRKFRIPHEILFLIEKIEKSGKKA YIVGGAVRDYLLGRSIANDFDIATDASPQEIIRL  
FNRVVP TGIKHGT VTVLIGEH SVEVTTFRVDKGYSDSRRPDTVEFTPNLIEDLSRRDFTM  
NSIAYDASEANLIDPFYQSDIARKIIRTVGNPLERFSEDGLRPLRAVRFASQLGFSIHE  
DTLAAIPVCMEAFKKVSWERIRDELKILLSPVPSVGLRLL ESTRLMEHALPELLPGRNC  
LQKGMHVYDVL DHSFLTVD SCKPDLELRLAALFH DAGKPFVKSSDEYGIPTFYNHDKKST  
ELAVQALRRLKFPNDCIDTVCHLIALHMFHYEDNWTDAAVRRFIAKAGEQYLERLFLRL

ADGSATTGIPADPRSLVPFRKRIDAILAEQSALQLKDLKISGNDLIDIGIPKGPVIGRIL  
NELLETVLDPAQNNRETLVKIAMGLKSKYL\*

>SPSA8\_v1\_10051|ID:41144820|rnc| Ribonuclease 3 [Spirochaetes Bin 1 SA-8]  
MDKQNEIPPELLHRFQNSLSVFININLLESALTHRSCRDAEMPHNERLEFLGDSVLGL  
AVATIVYTELEGRPEGELASLKSRVVSEQVLSRIAQAQIGISELIRLGKGEELSGGRQKKA  
LLADALEALIGAVYLDQGFEEAFQLVKRLLQEISDSLKHSSKDWKILQEFAQKEYKSL  
PTYTLGKTEGPDHARLFHVTCEIAGKIHGPYAGKTIKEAERLAAEHVCRTLARSSKRAAK  
LLDEIAGLQR\*

>SPSA8\_v1\_10052|ID:41144821|acpP| acyl carrier protein (ACP) [Spirochaetes Bin 1 SA-8]  
MDELFEKIKKIIADKLEVEESKITLDASFRQDLGADSLDTYELVYGIEEELGIQIPDEKA  
NEFETVRDAYEFIKTQVK\*

>SPSA8\_v1\_10053|ID:41144822|coaD| pantetheine-phosphate adenylyltransferase [Spirochaetes Bin 1 SA-8]  
MKAIFAGSFDPPTCGHEDIILRAARLFDLTVVVAENGVKMPFFSMEERIRLVTDIAKSH  
QLSNVVVARAEGLLVSFAREHGCRVLVRSIRNSRDLLYEQNMASMNRRLDPEIDTVFLPA  
RHELADISSAVRELIALGNLPGIVPLIVRKAIENRHGLLT\*

>SPSA8\_v1\_10054|ID:41144823|lnt| Apolipoprotein N-acyltransferase [Spirochaetes Bin 1 SA-8]  
MVRTLALSLSFSAVLCASLPNEIFPYGVWLLGFIALAPLYFALLKAENHRQAFSVGALFG  
AAHHALTSYWLFFYKDFAFWTLGSTTIAVAVVYGVCMYGAFLVRSTSGWRRPLIFAIW  
TVFEYQKSIGFLGYPWGLIPYSLTSLPILLQIADITGVYGLSFILAYSSAVISDISNSAQ  
NKKFLLAQGIALILAILGLLVYGGLAFSANYEKKAEIQAVLVQQNTDPWIAGEMAALAN  
IRNARKAMDEVQDSSGRTADLVIFSETSLRRPYTDFKPWFSTNPSDLPLTDFLRHYKVHL  
LTGAPVVDWNTYEASNSVILIDSEGQVHGYSYAKIHPVPPFAEAIPLWEYEWFRKFMREKV  
GIEGGWVMGTRISIFTLPLQTGGRVQFATPICFEDAFSDLCRQYILDGAELFINLTNDSW  
SRRESAQIQHWAIARFRAVENRRTLVRSTNSGVSCVIDPTGRSILELPQFTGTAALASIP  
VYISHSYTFYTRYGDLFARSMVAFLCLWASALLIKAKGKWPRLIFIHVS\*

>SPSA8\_v1\_10055|ID:41144824| conserved protein of unknown function [Spirochaetes Bin 1 SA-8]  
MSITEYLESPFFFEIERYHDHSAMDAVSFIGTLRKHPYDPEKCLLLTDRQDSLKWIEAGV  
IIEFRITDVLADELPSLVDEMGTARQLVRIWVRRGAIALRYEPFEVNEKSSGPRDSEHL  
RERFNAFFHAKTGGK\*

>SPSA8\_v1\_10056|ID:41144825| Radical SAM domain protein [Spirochaetes Bin 1 SA-8]  
MKPDLTEEPRQAQAFFQVLDSDRVQCVLCHHACVLKPGQWGICKVRTNAGTMSIPLYG  
HISSLAIDPVEKKPLLYFMHGSYTFSAFWHCNMKCPFCQNWSSHPNPGIAKRRTAVLPP  
EALVQKTLDSGCPSVSLTYSEPTIHIEYALETFKIAKAAANLATILVTNGSICAEPASLL  
KLTDAVNVDIKTASEERYRSILGGDLQTVKNFIQIAYQYSHLEVTSLLVPGILDQPDDIR  
IIAEFLASISPQIPFHITPYHPDFNYMQAPLTYRQMQEIAKPAYELLECVHLYRPWQDR\*

>SPSA8\_v1\_10057|ID:41144826| protein of unknown function [Spirochaetes Bin 1 SA-8]  
MCGNSSVVERHLAKVDVAGPTVSRLLNVAIRNLAESPFFLRKDIY\*

>SPSA8\_v1\_10058|ID:41144827|tig| Trigger factor [Spirochaetes Bin 1 SA-8]  
MVIDTKFEKLEKSRVRLTLVPAAEVRKEYDSMMKEYINSVKIDGFRKGFHVPASVLERK  
FGESLRDAMGRVLEKAVEEGLKTSEEKPLMYDSPELDGGKPEFAVDKDFTFVLYDVYPK  
VEAPADGIEITLPKVEISEADIARELEQIRQRNAIVVEKTGPAKGDIA TVNFFELDED  
EAPISGSAREDFTEVGS GMNLYKFDEDVEGMAAGDEKTITKTYPADSEYPELAGRTVKL  
NLKVTKVQKQDLPELDDELAQDVSEKFKTLDDLKQDLKKQLQTS LDERLRNLKEQAIVEQ  
LLARTKIEVPETMIAAELSMRWDA LKRD MGIDSDEKMEKIAA YSGKTRESLYQDWRPAVD  
KAIAGRLLLDALIEKSGFTVSD EDVQAEYARIAEGTALS AEEVKA EYEKQNYVEHLKNDL  
LERKFFDSVLANAVIKDGETVPFVDFM SKNQ\*

>SPSA8\_v1\_10059|ID:41144828|clpP| proteolytic subunit of ClpA-ClpP and ClpX-ClpP ATP-dependent serine  
proteases [Spirochaetes Bin 1 SA-8]  
MNEQMNNLVPIVIEQTGIGERSYDIYSRLKDRIVFIDGEIQDLTADLIVAQLLFLESQD  
PSRDISIYINSPGGSVTAGLAIYDTMQYLKPDITICLGQASSMAALLLAAGTSGKRFAL  
PSSRVLHQPWGNASGQASDISLQAREIVRLKKTIEYFARHTGKTLEQVSKDMERDFFM  
SAQEA VEYGLADKIMEPRKNVQTQK\*

>SPSA8\_v1\_10060|ID:41144829|clpX| ATPase and specificity subunit of ClpX-ClpP ATP-dependent serine protease  
[Spirochaetes Bin 1 SA-8]



MSKPRSNPPGKEEFCSFCGKSASFQMIAGPGVNICDECVRVCEQILDQEEQHVSNAFL  
GEVPKPKKEIKAYLDEYIIGQDYAKKVLSVAVYNHYKRIHHRHSADSDVEIEKANVLLLGP  
TGSGKTLLAKTLAKKLVKVPFAIADATTLTEAGYVGEDVENILLKLIQAAGGNIEAAERGI  
IYIDEIDKIARKSENPSITRDVSGEGVQQALLKIIEGTIANVPPQGGRKHPNQEYLRI  
TNILFICGGAFVGLDRIIESRVSSHPLGFGADIKTRAENLRELNFQLHPDDLKIFGLIP  
EFIGRLPIHVALDDLTRDDLKRIITEPKNAVIVKQYQASLXXX

>SPSA8\_v1\_20001|ID:41144830| Glycoside/pentoside/hexuronide transporter [Spirochaetes Bin 1 SA-8]  
MAQSPERKIKFKSLVSYGIGDLYGGGSFLIISTLFLFFLTDVVGLRPAAGLVVFGGKFW  
DAVSDPLMGCISDRTKSKYGRRLYFLIGIVPVFISFFLLWISFKTGSEFVSFLYFFAY  
ALFCTVYTMVMVPYSSLPAAEMSLDYKERTRLSGARMIFSLSIIISGVVPGMLVNTIYKD  
NPRMGFLLVGLIFGLFYAMPWFFVFKGTWELPEAEQNPSSSLGKAFSDMRTLFRVRSFR  
IHIGMYILGYSALDVLALFVYYLTHHIGARGYYTACLTMLISQLIVLPLYLFIANQLG  
KGKAYTIGAVIVVIGSLFYGIPAGAPLSTLMLLSAGLGFGLSAVVVMPWAMPLPESADAD  
ELVNLQRAGSVAGSFTLIRKLVQALVLWLX

>SPSA8\_v1\_20002|ID:41144831| exported protein of unknown function [Spirochaetes Bin 1 SA-8]  
MKKSTHRDHFGIVLTLFLSFCFSVSCASSDPTKTDVVSAPSMYHRAESDIRTEIQPIMNA  
GKVLVVYYSQGTAGRQVAEDIAVLTGADLEEIKEVHERKTGFFGFMITGAASTFKFSSKI  
EPPQRDTAQYDVTYVITPIWSWSLSPVRSWLKLSAGKIRQAAFITISGDTKPKDKVVKDM  
EKTGKVVPAFVGYAERDFLPENRAVYVEKLTILMGLSESKP\*

>SPSA8\_v1\_20003|ID:41144832| MATE efflux family protein [Spirochaetes Bin 1 SA-8]  
MKKLPVQKLPFGPASFYRDALALAIPLVQLSLITGLVSLVDNFMVAGLGDARMAGVNIA  
NQINFVFLIVNVACIAGGIFLSQFRGAGDKKGMQAQAFRFKIVAAGLIAAVYFLLCQMFP  
EQLLSLMVAGNREGAEIVEQGVRYMRAVSWSFVPLAISAAFSSFRDIGVPKIPLIVSTT  
AALVNTFGNYLLIYGNLGAAPRLEVTGAAIATVIARIFELAAFFIMLKRMKPVFVFRPSAL  
FALERKFLREVLSRSAMMFFSETAWVSETIITALYNGRGAETVAGMAAGWSVANLIFL  
VFPAIHTVANVVVGSTLGAGRLDEARQKARWVLSGSVVMGIAGGLAAALSTLGIPLVFGN  
LTDSARVVTRGLIFVIGIYLPWCLLNAQFAISRAGGDTLMGLWVDVGVTYLIFIPAAFL  
IARLTDWGPVLLFGIAKISDIPKALVAAWWLNERWVKNLTSL\*

>SPSA8\_v1\_20004|ID:41144833| putative Diguanylate cyclase [Spirochaetes Bin 1 SA-8]  
MDGTTLILLALGSCIQLLFGALARMDGNKNAFRACLAGVFLLTIGLVAAGSQDVLLPWV  
SKGTGPLTIIAGAFSLAASSLSDSREKKFQTRLGIGAGVAYSATVIFSALLPGWIWIA  
TAFASAPFFLIAGIFLFEAEDRTLLKIVSGIMFSSIAALLMLAAGLKTAGFSVGILRQSN  
VLLALFVMEQIVWAVFLLLFSEANGFRLAQASTHDELTLGLYNLKGFSSEETSKTLSMCTR  
HNIAYSFFMFDIDHFRKINDELGHLAGNQILMDFAHRLSSRIRVYDILCRTHGDEFMLFLQ  
SVDHEKIEPVMMDRLCGGFSFQTEEGIRYSVSASVATVDHPAGRAVRFEELLAAGIQGLLA  
AKQQGGARLEQVPPF\*

>SPSA8\_v1\_20005|ID:41144834| Transcriptional regulator [Spirochaetes Bin 1 SA-8]  
MAHAGTRWPGAKAMEESSLEERDWKIIDVLYAEKSISRAAKTLYISQPALTSRIHLIEQD  
LGTTLAIRTSKGVKFTPOGFLAEKARTMLREYAAIRELLQAMSDDISGTLRIAASQFMM  
KYYLPDLLKEFKNQYKVEFNLTSAWSKDVYGIVRCRDAHLGFVLDLLEWEEERFHLFQD  
PMCIASAFPIDLVDLPNLPRIEFHTNPSNKA VLDRWWQSNFDTPPRISMVVDILDTCHEM  
VRHGLGYGILPKMIVQSDPLLHLIELKDLEGKPLTRDGMWMIYSARSRELGAERFIEFVK  
G\*

>SPSA8\_v1\_20006|ID:41144835| conserved exported protein of unknown function [Spirochaetes Bin 1 SA-8]  
MSFMKKAFLILGLLVVAGGFQKAPANYPTKAMEFIAPSGAGGGWDTTIRMVAKALQD  
EKIVSVMPVNTNRTGGGGGINLAYMQTKKGADDLISVYSPPLFIKLNKTSKFGYKDTTP  
LARLIADYGAFYVAKNSKYKTMKDVLDVAVNANPSSVKIGGSAAGSMDHIVFLYVAKAYG  
VKDLKKIQYIAFQDSTGPTQLMGGFIDVLSDDIASLRGLVESGDIRCLGVTSATRIGTGI  
VATYPTMKEQGIDVEFANWRGLFGAPGMPDYAVSYWRDAIGKMKVKTATWKKIMDEQAWTP  
YYMDQPDFMKFLDKVNAEYTEIFDEIGILVK\*

>SPSA8\_v1\_20007|ID:41144836| putative tricarboxylate transport protein TctB [Spirochaetes Bin 1 SA-8]  
MVLTIQVISDLFYLVLALAYGIGALSLEAMFGDPWAPRIYPLIACGMAILSVVLLVGE  
LKKQRSKADAAVRFSIDSDGMIVAFVTVASLFTFLFNRLGFILSTFLFMESIMLFISK  
AKKMLWPTVIAILFAVGVYFGFVNLLGVTLPAFILEF\*

>SPSA8\_v1\_20008|ID:41144837| Uncharacterized 52.8 kDa protein in TAR-I ttuC' 3'region [Spirochaetes Bin 1 SA-8]  
MESIFQNLGIGLAVAIQPINLLWVTVGGILGTIIGMLPGIGPASGVALLLPLTFKMGVPG  
ALITMAGVYYGAMYGGSRASILINTPGDGAAIASCWDGYPLATKKKRPEAALAIASIAF  
IGGMIA TVFMIFLSAPLAKLAIKFGPAQYLMLYLFALSATASMSGKGVKGVAMFGLGL  
MISTIGIDSLSGVHRFTFGLMELQGGIDFLIAIIGIYALGEVFESLKSIGKGGKTKIQKGF  
GRIWITKDDWKRIWPVILRSTPLGFLVGVLPGTGATMASIMAYNQEKNSKHKEEFGEA  
VEGIAAPEAANNAASV GALIPMMTLGVP GSGTTAIMLGALMMLGLQPGPLLFRTRTPEIAW  
GVIASMLIGNIVLAIINLPMAGMLVRILSVPERILYPIILGLAFLGTYSISNTTDFDLIV  
IGFGLLGLFMKKS GFPTSPMVLGAIIGGAIEEKFRQALTISNGSYRVFVSDPITIVLLVL  
TLGSFLLPLFKKKGIKA\*

>SPSA8\_v1\_20009|ID:41144838| putative Protein CitXG [Includes: Apo-citrate lyase phosphoribosyl-dephospho-CoA transferase ; 2-(5"-triphosphoribosyl)-3'-dephosphocoenzyme-A synthase] [Spirochaetes Bin 1 SA-8]  
MEIMDVKGKAFSSDIDKLVRIAILDARESRAEAQKELYRRYAVPIVSMTLVSPGIKKN  
TRTRRAALHAAWSILLQQLSSAGFTILQSRCRITAAGPECLLA VEGSASEIKELCLQLEE  
CLPFGRILDIDVLSDSGKGLASLHREAFGRSPRRCLVCDSDAFLCIAEKRHTAAQLEKAC  
FQLYRMTADAMEEDIAEMAVASLIAEASLPDKPGLVSPGNQGAHRDMDFSHMVSSAHALR  
PYFFEVAKRFSFSYAGNLEMLLEILRPLGLEAEQRMYYAATGGINTHKGAIFALGFFTAAG  
YLAGHTELFSEYASYAEALCDIIRKIANNVASSDYEKHERLVPTNGIRWYREYSVTGARG  
QAERGYPLVFNTIFPVAQGLSHGTHETSMVLLNALIRSI AELDDTCLLSRGGRAGLDEA  
RRRASELLIKLGKSENSAEAHNVILEFGAWMREHALSPGGSADMLAAGIFLYKLNERYGG  
FSGWQP\*

>SPSA8\_v1\_20010|ID:41144839|citD| citrate lyase, acyl carrier (gamma) subunit [Spirochaetes Bin 1 SA-8]  
MATVKQISQAGTLESSDILVQLSPAEPGTGIKLALESPVRKQFGTRILQIISAELHRAGI  
NDVLVSANDRGALDYTIEARIQAAIARASGGEEART\*

>SPSA8\_v1\_20011|ID:41144840|citE| citrate lyase, citryl-ACP lyase (beta) subunit [Spirochaetes Bin 1 SA-8]  
MKPSLRRAMLFAPGNPGLLQNAGIYGADSLIFDLEDAVSIYEKDSARLLVRNAIRTIQY  
PCEVGVRIHITTPWGLRDLEEVLSAKPDFIRLPKCEDAEELKLIDDIISKAEEKKHGFAE  
GSIQLMAAIESPKGLRNAYQIATAVPRMMALAIGGEDFATSLKTTKTKDGTTELLVAKCMI  
VFAAREAGISPIDS VFSDINDEENFIKETELAKQLGFDGKSCVHPRQIELVQRVVFQPTQK  
EVASARRIIKAYNEAMERKLGVAVDGKMIDAPMITRANRVLANARASGLIEEENLV\*

>SPSA8\_v1\_20012|ID:41144841|citF| citrate lyase, citrate-ACP transferase (alpha) subunit [Spirochaetes Bin 1 SA-8]  
MKNKAGREIPDTIQGYGTVIPYQGP FALKPDGYRAGSALKMAKPGQEKVLR SIEDAIAVA  
GLKDGMTISFHHALRNGDRVMNLVISA IARMGFRDIRLAPSSFLDANDELIPYFEQGVIT  
GAQNSGARGKLGAYLTHNRLPKMTVIRPHGGRARAVIAGELHIDVAFLAAPACDRLGNIT  
GVLGPAACGSLGYAMIDARYADTVVAITDNLVDGALCPVSIPHHLVDFIVPVESIGDPRG  
INSGSLRLTTNPRDLLAKMTALVIESAGFYREGFSMQLGAGAASVAAGRFLRESMMRDK  
ITASFAIGGIPGPFCDLLDEGLIHTLFDAQSFD SRAIQSLRDNPRHQEYDIDQYANPWNK  
GAMVNFLDYTVLGATEVDVDFNVNVTDSNGVIMGALGGHPDASAGARCTIITPPLLGR  
LPIITDSVQTIATPGETVDIVVTERGIAVNPLRPEIAENLKKAKLPVMDIRELRDLAYSF  
SGIPEPVRVTDEVVAVIQYRDG SVIDVVRKPAD\*

>SPSA8\_v1\_20013|ID:41144842| Citrate lyase ligase [Spirochaetes Bin 1 SA-8]  
MYGTPHLEIADLTDSGVVAEVQEFLSRHALGFDVAVDHTVILRLSGRMIGTGSFKGEVLR  
NIAVDEEVQGEGYTATILNELVQE QGRRGIMHRLIFTKPQAASRFQNLGFRLIADAKPWA  
VLEAGLGLDDYLARVKKICDDLPRRTAVVNCNPFTRGHLG LLETAARESEAVIVFV  
VSEDRSLFPFKDRIELIRRGTVHIQNLRVVETGN YMVSSATFPTYFTREEHLADAQAHL  
IALFAQKIAPALAI VARYVGDEPYCAVTEAYNRAMRDILPKAGVSLKILPRYTGPDGKPI  
SASTVRDLIRSGDWEKIRPLVPDVTWDYLRSPEHLDIIEKIKASHSRH\*

>SPSA8\_v1\_20014|ID:41144843| Class V aminotransferase [Spirochaetes Bin 1 SA-8]  
MKGKRLLMIPGPIEFTEEVLAE TGKPTLSHVDPQFIKEFGQALSMMRKVWLAPSGQPFIV  
AGSGTLAMELAVANITEPGDSVLIVNTGYFS DRMAEVFKVHGAVVDIAPSELCDVPQTEI  
IRSMLKAKRYKIVSITHVDTSTSVKTDVKAIAEAAREAGALSLVDGVCAVGG EELRQEAW  
GVDIALTASQKAIGVPPGLALLVAGDRALEAFKTRKMPVRSYLDWKYWL PVMEAYEAGK  
PAYFGTPAVNLVRALNVSLGQILAEGMDARFLRHRNAQAFRAAMSAIGLSFLPVRENLL  
ASTLTA VWYPEGIDASVLPLIAEEGAMLAGGLHPAIKTKYFRVGHMGMSDASEILATIGA

IERGFSRAGYRFDHGTGLAAAEKILLA\*

>SPSA8\_v1\_20015|ID:41144844|rhaA| L-rhamnose isomerase [Spirochaetes Bin 1 SA-8]  
MSTKLYREAQERYGEIGVDTDKAIRTLSQIPLSIHCWQGDDVIGFDGAARLSGGILATGA  
YPGRARNAEELRRDIEKAFSLIPGTRKRLNLHAMYAETNGAKVDRDQLEPKHFDGWLAWAK  
GFGIGLDFNPSFFSHPLAESGFTLAHADPSIRNFWRHGIASRQIAQFFADELKDTVVNN  
LWVPDGYKDTPADRLGPRIRLQDSDLQIYHDSLPNDRVIDSVESKLFSGIGSES YVAGSHE  
FYLGYAAKHALGLCLDMGHFHPTEQIADKISSVLLFIPKLVHLHLSRQVHWSDHIVVWND  
DISNVAHELVRQA WDRVYLALDYFDASINRIGAWVIGARSVQKALLSALLEPSEILRDE  
ERHGNYFKRLAYLEESKSMPSFAVWNYCYCETENVPENATWIDSISEYERLVL SKREG\*

>SPSA8\_v1\_20016|ID:41144845| protein of unknown function [Spirochaetes Bin 1 SA-8]  
MLQNHGIFIAADSPVEIDKLYETVISAILKKISIQPDMSPITVNTQDMDKIISTIKKYFP  
DQAIHIANTKACSSFLETNETFKPLAEPFTP DHIVYAGAKPLYVVKKDTAMDPEKMLMLAIN  
QFIETEEFSPKIIAVEKTGVFALS DTRRKAELAMALFLDTVKIASLAERFGGSHHMNKAD  
IDFIKNWEVEHYRAKVTAEKKRINL\*

>SPSA8\_v1\_20017|ID:41144846| protein of unknown function [Spirochaetes Bin 1 SA-8]  
MNTIKSLIEISRKYGSNPEFVLGGGGNTSCKDNGILTVKASGFALGTIDENGFVKLDLQK  
VLAILENTFSTVPAQREKQILDALQDARLQKHFQV\*

>SPSA8\_v1\_20018|ID:41144847|yiiL| L-rhamnose mutarotase [Spirochaetes Bin 1 SA-8]  
MKRNAFIMYLPKPGNEAEYKRRHDEIWPELEEILRSAGISNYSIYLDNRNTLFAFQMLTD  
DATDNELPVNSVVRKWWDSMKDLMETNP DNSPVCNPLIEVFHMD\*

>SPSA8\_v1\_20019|ID:41144848| putative sugar ABC transporter, substrate-binding protein [Spirochaetes Bin 1 SA-8]  
MKKIVIAVAMIIAIMGMVLPASVFAADAKPKY AIVFKNTGNPYGEKQLEGFKTGIEEQGF  
EAILRSPDLPTAEAQIQIIEQLIAQKVVSICIVGNDYDALQPVLKKATAQGIKVFSLDSS  
VNPASRLTHVNQADSEKIGQTLIKAA YDMAGGSGEIAILSATSQASNQNIWIDFMKKELA  
KPEYKNLKLKVVA YGDDL RDKSVSETEGLLRSPNLKVIIAPT TVGIAAAGKVLTDKGLK  
GKVALTGLGLPSEMAEYIENGVCGYMFLWNPIDVGYLGAYTATALVTGKIKGAVGDKFSA  
GRLGNYTITKAPDGGTEVLLGPPFKFDKSNIAMWKKVY\*

>SPSA8\_v1\_20020|ID:41144849| Branched-chain amino acid ABC transporter permease [Spirochaetes Bin 1 SA-8]  
MSDRTIEIQKPRTWKTFIYQWEWFLLLL FILICSINSSLSPYFLSFD TFLNAPMNFLDKA  
FLVLPMMMIIVLGNIDVSVGSIVALSSVIMAVSYNAGLPMPMALILALVVSTLCGFINGM  
LITRFKELSATIVTLSTMIIFRGIA YIILED RASGKFPEWFSFLAWGSIGILPFIFIAFI  
FAAVIFALVLHRSRFGREIFAMGNNSTACRYSGIKTDDVLMKVSLLTGFMAGITALFLTS  
RMGSTRPNVAQGYELDVIAMVVLGGVSTAGGKGRIGGPILAIFIIGFLNYGLGLVNISAQ  
VLLIILGLLLILSVMIQNARFLKRNQKSARPLTIKS\*

>SPSA8\_v1\_20021|ID:41144850|rbsC| Ribose transport system permease protein RbsC [Spirochaetes Bin 1 SA-8]  
MSDKTALKSGERFRELGLLIFIIVLSVIFQLRNPSFLTLANIKDLLANTAILGILSVGMM  
MVLLTRGIDLSIGATMALSGMVCSLTGIA YPDMSPLVSILQGMAIGLVVGSIIIGILVAYF  
NILPIIATLGLMNIIRGLTYLVSKGKWVSA YQMSAGFKNISKGTFLGINNLVALAIIIFI  
IFYFFINHTRTGRFIYAVGSPNDTADVVGIPRKRIICMVYIFMGALAGLAGVLWVSKFAS  
AQGDTAVGYELNVIAAVVLGGVSVSGGRGK VSGIILGTVLF GILANALPLIHISPFWQQA  
IQGIVILAAVIANVLMKRSNDKSALKKRAI\*

>SPSA8\_v1\_20022|ID:41144851|rbsA| fused D-ribose transporter subunits of ABC superfamily: ATP-binding components [Spirochaetes Bin 1 SA-8]  
MADFILEMEHISKAFPGVQALDDVHF KLERGSIHALMGENGAGKSTFIKIITGVYQPDSG  
IIKIDGKPVQIHSPLDSQHLGIAAIYQH VTCFPDLSVTENIFIGHETINPLTRKINWKEL  
HENAKNLLDQLDADFSPQTVMGILSVAQQQIVEIAKALSSNARIIMDEPTAPLSKRESE  
DLYRITESLKAKGVSIIFISHRLED MYRIASTVTVLRDGHYINTWPLDAVTEENLVKAMV  
GREITQYFPQRDSAPGDVIFSAQNL SRTGFFKNVGFVVRKGEILALTGLVGAGRTEVCEA  
IYGITKLD SGTLMLNGEKLKISSPMDALKAGIGFLPEDRLKQGLVLDWEIFRNISLSALK  
RFSRHGFMHDS DERKTAKELAEKLEV KATSIDYKAAATLSGGNQQKLIVAKLLTGDMKILI  
LDEPTKGVDVGAKTAIYRIMNSLAEAGYGIIMISSEMPEVIGMSDRIVVMREGRVTAIME  
TKTANQQAILEASMSIAKNHDSEENQ\*

>SPSA8\_v1\_20023|ID:41144852| conserved protein of unknown function [Spirochaetes Bin 1 SA-8]  
VACNVFYITWEEKSIAALSEGLILRIMTKAGLFCIGLDTYWKQFEGLRERLSGYQQRVAD

RIGKAGVQVVDAGMVDTTDKARKAARLFKKEGVDIVFLYISTYALSQTVLPIALENPKTP  
LVILNLQPSAALDYEFNALGDRGKMTGEWLANCQACSVEIAGVFNNASINYDIVSGWL  
DDETSWKQIKEWLEAASIRKVIRDSNFGILGHYYEGMLDVYTDVTRLASVFGCQFTLLEM  
DYLKTLRDSVSAQEVAAKISQFSNEFSVSPECELPELERAARTSCSLDKMVEAKRLGGLA  
YYYEGVSGNDHENIITSIPGNTLLTSHNIPVAGECEVKNLIAMKILDAAGYGGSFSEFY  
LSDFTDDVILLGHDGPAHASISDGKVRLVPLPVYHGKPGKGLSIQMSVRKGPVTLSSVQ  
GPGGSTKLLIAEADAVPGPILLIGNTNSRYRFPISARTFINNWSKAGPAHHCAIGTGHLA  
GILKKLAALLGIESIVICESGETSNG\*

>SPSA8\_v1\_20024|ID:41144853| putative transcriptional regulator [Spirochaetes Bin 1 SA-8]  
MGSNESNRTKTYFQYLTCSEEDEKWQLVCTDAGFTEVPSYTFYPPNKS GHPRAFQYVATG  
RTLNEFQIVYITKKGKGVFETLGKKFDIIPGSIMIVFPGIKHFYKPIYEVGWYEHWWVGFKG  
PYADSLVKNGLFLENPCFIIGLQNQIIELFSEIVDEVREKQPLYQIKAASKIIALIAEI  
LATERRQAQPSQSEKIVEQAKFLMEESIYDDIDLNSIASQVGVSTSKLNEIFKTYTSMTP  
YQYYIHIKLAHA KALLEQGDLSIKEVAFRLGFEDQYHFSRLFKSKTGIAPSLWKDFVYQ\*

>SPSA8\_v1\_20025|ID:41144854| putative Beta-lactamase [Spirochaetes Bin 1 SA-8]  
VAITQKTALDSLIEAALSDKAFAGIACGVWKGDPVYKRYAGFAVPDTPVCADTMFDLA  
SLTKPLATAPLVMMARDEGMLELEKTVGNYPHIHQDTAPIPLISLLLHLSGLPAIPALQ  
TEFPDASNFSKEKACTKLFRLKPDALFGKVLYSCTNYILLGLILEKIYGMTIGQLFKCK  
IADRLGLEHCGFAPGMLKNGEPQVLEKAAATEYCPWRKRRICGQVHDESSFCLAGQAGNA  
GLFANLDDTASIGEQLRHGGKPLLSRASHMLMTSVQTVNLAERRSCGFRFHDDTTADGP  
LWPHDSFGHTGFTGTSIFFAPRQDLMTVILTNRVYHGRDITLTKIVQFRKDFHSLVWGLW  
GEEAL\*

>SPSA8\_v1\_20026|ID:41144855| conserved protein of unknown function [Spirochaetes Bin 1 SA-8]  
MRIHYTRSGLDLADVSRRGKRYGLATHPAAVTFKGEPSWKAFMNAHLNLAFLGPEHG  
FRGASQDAVSVEDEIFLGIPAYSLYKRLVPEPVMLEHLDALVFDMDQDVGCRYTYTYLTL  
AYIMKACSDARLPLIVLDRPNPAGGIKVEGSPKPEDESFGGYGLPPRYGMTIGEFARY  
LQGEYYPSCLEVVRLSGWSRDMQWLETGLPWPLTSPNLPSLSCAEVYAGTCLVEGTWLS  
EGRGTSRPFIEIGAPFIDGETLRTALAKLDLPGVVFLSLFFVPTASKYMNQCEGILVTV  
VDVESYRSLDTGIAIHTIKSLYPDQFRWREDWENPALSFFDKLAGGTTLRHMIDSGRSL  
EECLAFAHQGEAAFLAGRQKYLLY\*

>SPSA8\_v1\_20027|ID:41144856| ABC-type sugar transport system, permease component [Spirochaetes Bin 1 SA-8]  
MMLKFTRFQKMVAIFFLALLAFINLYPIGIMILSSFKSTREIFMKPFNLPSVWRWQNYVS  
AWQRADFVYFKNSILVTAISIAAILLVSSMAAYVIARFDFKGRYIYLYLLAGLALPTR  
LAIPIFLLMRSMHLLDKLSGLVIVYTAGGIAFSVLLVNFKKLPRDIEDSAMIDGAGP  
FRIYWKIDLPLLKPALVTVAMFNFDVWVNDFFFPLILLSSKAKKTIPLGLQAFFGEYTIE  
WDVLFAALNISVLPXLIVFLILSKQFIAGMTEGALK\*

>SPSA8\_v1\_20028|ID:41144857| Permease component of ABC-type sugar transporter [Spirochaetes Bin 1 SA-8]  
VRKKA YLLMLLPALLYSLFVAYPFSSGLSFYDWP GIGPKKFIGFGNYRNILTGFMAP  
EFFRAAWHNVIFFIWSLILSVVPGLFFAFLAAGIKGTKFLKVIYFFPNTLAIVIVGFLW  
GLLLNPQWGLVNQLFKAIGLGF LAKPWLGDTKLALPTIIVVTAWRGLGFYILVYLAIIIG  
IDREMTEAARIDGATEMQIAGRIILPHLMPIIATTSMLKFIWTFNIFDIVYAMEGTQGGP  
AGSTDVLTGLFYRIAFGLGSSQVGMGLGATVVTLIFLIVFPVSVFYVFIIEKRVERGE\*

>SPSA8\_v1\_20029|ID:41144858| Extracellular solute-binding protein family 1 [Spirochaetes Bin 1 SA-8]  
MTRKLAFLALMVCLIFPLWAQSKPATVTIWGWRAQDQDVVWKS VETALKGKGEQITIKYEV  
FPPTHEYDSKLLVSLQGGVGPDLMYTRRLPGARTQALIDNGYITALDGLLNL SAFDPVSL  
FIQANKKTWGV PFANQVVGIFYNKAI FDKFGLKEPQTWDEMVAVAETLSKNKVTPFFVAG  
KEAWTLAMQNAMIGVSYPGDEWIGKLAKGEAKFTDPEYVAMLKDLNALKKYFQKDFMANT  
TAEQDVSFAMEQVAMIFYGVWNTNWLKTNPDLKDFDFPVPKTKNVP AKIYTYMDGSYG  
LNSATKNKDAALKVLQFTASKTYGELFSKTTGEITAVKDV TMPASKPILVKCYDKMNTIA  
STNRYWVGSPFDAGMPSVYNILQE HMQSMYLDLITPEELAKKLQDGISTWFPAFKK\*

>SPSA8\_v1\_20030|ID:41144859| putative Glycerol-3-phosphate-binding periplasmic protein [Spirochaetes Bin 1 SA-8]  
MKRGLAILAILLSAAIAMAAPVKVTLWYAQTGVYAKSLLEIVDSFNKQNQDKIFVEAVYT  
GNYQDTMQKLLAAMVAGDVPTLAQIEQSRIGQFVDAEAFQDLNAYIKSDQAFAATLSDFW

PRFINANTFSGRLLGLPLNCSTPLL YINRDLFRKAGLDPDKPPKTWTELYAAAKKISALG  
PDFGYRFGIDDWLIESTWQFGGEIISEDGRKMLIYSPETVAGWKYFQKGVKDKAFIFG  
VTGGNELDISGRIGMVVRSTGSIQYMKDNAKFDLGATVMPMEKRKIVAIGGANIFMFAFR  
PKPEKAAAWFLKFLTNTENSRKWAMSTGYMASRISAFESKEMQAVLKADPRFGLTYEQL  
KESAVRRPWFGPYPEVHAMMTSAWEQVMTNTDADVDAILKKLQVEAQKVLDTYYK\*

>SPSA8\_v1\_20031|ID:41144860| Binding-protein-dependent transport systems inner membrane component [Spirochaetes Bin 1 SA-8]

MIRKYPLSLKIAVTLFLFLAILINLPFFWMLVTSFKTEDQAFSIPPSFLPTIFDLRNFV  
KAASFIPIGRYILNNTLYVSFAVVALHFFTNLSLAAYGIARIKFKGASVVFAILLGTMMVPP  
EVTMVPLYVIVKKNMNMNKYSGLILPFASSAFGIFMLRQFFMGIPKELEDAAIIDGAGRM  
RIFFSIILPLSKPALFTMSIYSFLAVWNEYLWPLVIINDSARQMIQVGISQFVSGWETQW  
TMRMAASTIAVLPVILFFFVQKQYVEGISVSGMKE\*

>SPSA8\_v1\_20032|ID:41144861| ABC-type sugar transport system, permease component [Spirochaetes Bin 1 SA-8]

MVRSRKDELLGWLTVTPALVSQILFIYLPLATAISISFNNWNLIRPMRWVGLDNYKTMFT  
NADFWNSLKITAIYVVGTVIPSVVLGLVLALFLNIKWLKKGKMLRTLFIYIPVITSMAAAA  
VIWGWLFESNYGLVNVMLGWFGIGKIAWLSDPNYSVALMIIGIWKRVGYNMVFLAGLQ  
AIPSVYYEAADIDGASSYQKIMSITLPLSPTTLFVIVQFIASFRVFSVSVMTRGGPA  
KSTQVITYYYLYENAFRYLKFQYASAVAVFMFLLMVFFTVFQFRASKKKVFYS\*

>SPSA8\_v1\_20033|ID:41144862| conserved membrane protein of unknown function [Spirochaetes Bin 1 SA-8]

MKSGFSPFEEYRSLPRSIWALFVVRVIAAGNFVFPFLTIIITTKLDWTAEKGTGFLSLI  
QIAALPGVLFAGRLSDRTGRRLIIMLCQAAAAILFAISLATGFTDFLPYL VGAASILLAM  
TWPVSGALVADLVPPERKTAAYALLYWGNNIGFSIGPIAAGFLLHRAPSLIFLGNMTALI  
ISINILYRYIPAKIPAQPTAEASERSGVNAMEANYEGGLARVLKSRPTILVFAFIVALLN  
LVYSQHSFSLPLYLSEKMGSAGA EVFGAAMTVNGLTVVIFTLILSKITQRLPVLIMVIA  
AMLYAAGFGLLSFHPSLLLVLGSTVIWTWGEILGATNINVYIASRSPQSHRGRISITSL  
VSNLGSLSGPILAGQLIKRFSSAFIWKAAAPAIATAALFLLLWSHDRTKGLQ\*

>SPSA8\_v1\_20034|ID:41144863| Thymidine kinase [Spirochaetes Bin 1 SA-8]

MRGYDTSDTGQLLKNLGFLLKVHASYSHHDFITPGRRILVIGPMGSGKTEFTARVWRDS  
KVALRKNGKAVNLTNTNGVDRREVFVVRASLDKARFPDYPEDALAFRGGYERCGDHIGSA  
RDSFALEVLLAENPSIGTWIVDETAFFDERIAYLMTEESESRSVTFICPTLVLNFRREIF  
NQTARLLLENATDVFPLTAYCEHEDCLLDSLYTYRYYLIDGKECPALYFDPLIIGGDRT  
KTDGREPNYCTRCDTHHYLPGKEYTFFTLKPLGEQAARGNIAPLLNELNALAGNIEASRL  
YASMEKRYIACDEPCPVMNALLVPCIAERALVYL YAEQNLLSTEQVIFIVNKLGLDREY  
LAQRLADNRRPLEF\*

>SPSA8\_v1\_20035|ID:41144864| Bacterial extracellular solute-binding protein, family 5 [Spirochaetes Bin 1 SA-8]

MKTRYFASAILLLALMFLLPFVFGQSENPDFVTVYGTSLPEFDPHKAFSSEAQLFTA  
LYEGLFSYDPATLEPVNAAVATWSKSKDGLTYIFVIKNNAFWSDGSPLLARDFRDSWMRM  
LKTNADYATFFDIIDGAEFRTGRDTNPEHVNIEAVSMKTLVVRLKRPAA YFTRLLCHHA  
FAPIHPSMLAHDNFS DGIPFVNGPYRFEKFS DDEIILAKNEFYWDKASVSIERMKMLFS  
EDDAIASTMFNNGNAHWLFGIGDYDSILMEEAIQVNPVFNSTNYWFFNCSVKPWSDPKVRR  
ALALLLPWNNIRSKEVYSVPATTLVLPLPGYSKAKGIETS NKTEAMQLLAEAGYPEGKGL  
PAIQIFYADSKENRRIVSLFKSAWEALPGLIVQGLSLHPAEY YAAIAEMKNMPEMTLAHT  
TWIGDFADPEAFLQMWTENSPLNDAGYASAEFSQSLAKSYGAEGTERMNLLAEAEITLLQ  
QAAVLPYHGFVGSVIDIDYIEGWYQNALDLHPYKYFKFGTPSIQPNIAQSGNPSQSKDI  
\*

>SPSA8\_v1\_20036|ID:41144865| conserved protein of unknown function [Spirochaetes Bin 1 SA-8]

MGLAKEFDKEILVMGVLVSDSIIESQAMEALQANFGSIDVMTEHEIFTWTDYYNLEMGP  
ISRFFLCFQNRVAPDRLAEIKLLTNDIELNYAVDGKRKINLDPGLLAPGRFCLATTKDRA  
HRIPLKDGIIYAE TLIFQKKEFHPLPWTPDWASEPVRNMLADWRKKLFL\*

>SPSA8\_v1\_20037|ID:41144866| exported protein of unknown function [Spirochaetes Bin 1 SA-8]

MACFLACTVLLFAFACSSCSAMQRWYVHRLEIAMPQIPAVWDHIAPPVYELAWTDEEGQA  
RTAYVPSGQSAVVTVARGVKQAVLAFPIVFQKRLKPAGGLYPDYLYKYPGRPFPSDEPDEL  
TIDFEGGYIASVASIIAKAGFNPWILRLSCLKQDWISRHADPWGVDPALAASRLIDGTYS  
SAVFSQKAESVTVSLPPPAGWLPASPFARLREEDGKILA EVNEGFLHFYRS DQIAMVSAS

EGRVVLQVSRISGQADGENRALPDDAFY\*

>SPSA8\_v1\_20038|ID:41144867| putative PAS:ATP-binding region, ATPase-like:Histidine kinase, HAMP region:Histidine kinase A-like [Spirochaetes Bin 1 SA-8]

MKPSMFRKTVLLVNVAILTLTLLMTAGALLADRAYLASSSRYLLESAYLASALITSDSS  
QAFNLHQLSNSGSIRLTIAADGTVLSDSSADPASMENHALRPEVAAALQGKSSWAVRIS  
ATTGMRTLAAVPLALYKSSAGSILRLAMPLPSFFARLSGLAWIPPIFLVLVALFSVAAS  
LLIQQSVTIPIKLTEKAERYSDSESFSEIKLKSIPRELLPINAALDTMAKKILSRLEN  
RRMRSRYEAILESASEGIIASDESLRIQEVNKAAGLFGINETERTQCIGQSVLKGLRNS  
LINEIFETCSHEKRLITREIPFFSENGERHYAVHASPFEDEETHGIVAIVSDVTEIRRL  
RIRKDFVTNVSHEIRTPVQVIKGYAEIMSDTLAHAEPTSADGDLFSQLREQSGIIHHSAL  
RMEEIHKDLLLSRLERDPGTWIIKEPCRIRPILEVVKTALANQAREKNMPILACPEEL  
EAQVNSGLLEQALTNLVGNALQYSFPGTAVEVSASTKDNTLIISVRDHGAGIPAKDL DHI  
FERFYRVDKSRNRSTGGTGLGLAIVKHIVTAHGGTASVESVVGQGTVFTISLPAGNTRNL

\*

>SPSA8\_v1\_20039|ID:41144868|regX| Sensory transduction protein regX3 [Spirochaetes Bin 1 SA-8]

MPDILIVEDDEDIGKLVSLSCRNEGWHVPVHVKTAEALIRIRSDRFDICVLDLMLPGMDG  
LSFLKVIRSMSILSFMHIIASAKDDDDTDIVAGLELGADDYVVKPFSRVLVARIRAALR  
RNADSTTANSQKPTVFEHRGIAINKERHSVTVSGKPVDFSATEFGILELLVREPRGVFTR  
EQIINHVKGPDYPVTDRAIDVHILSIRKLNELADLVETIRGIGYRLKDS\*

>SPSA8\_v1\_20040|ID:41144869| Phosphate-specific transport system accessory protein PhoU [Spirochaetes Bin 1 SA-8]

MQSMSLKIKIDHLNELFLSMSIKVKEALEKSRFALRQGDKEIVKLIKEEDAEIDRLQQAI  
DDEVAQTMATQQPVASDLRLVSLKIASDFERAGDYAVHLAKAGKHFVNMPVWKQFDIL  
DAMAQQCGVMIDGTARAFIERDSIHARSIKMDDDVDHAHKA VVKDTLLLIHQNPDLAEQ  
AAKIITLSGYLERLGDHMTNACEAIVFMVEGIHTELND\*

>SPSA8\_v1\_20041|ID:41144870|pstB| phosphate transporter subunit ; ATP-binding component of ABC superfamily [Spirochaetes Bin 1 SA-8]

VKSMEYGNTSGVATVLPQFVSDHVALEVKNLVVEYRDGVQAVKNISFSVPRQAVTAIIGP  
SGCGKSTALRALNRMNELIPGKTTGEVLFHSKNIYDPNVDVPTVRRHIGMV FQKPNPFP  
KSIYENIAWAARIHGLSDNLDLVESSLRQAALWDEVKDKLKKKSALSLSGGQQQLCIAR  
SIALKPEIILMDEPTSALDPSTASIENLIHDLKQRYTHIIVTHNMQQAGRISEMTAFML  
TGDLVEYAPTNRLFVSPEDERTERYITGRFG\*

>SPSA8\_v1\_20042|ID:41144871| conserved membrane protein of unknown function [Spirochaetes Bin 1 SA-8]

LIELSAQTITFLMLGGLFILITGYPIAFVIGSVALGTGLLVFGPNTTFHILYTRFYDLS  
LNYPYLAVPLFTFMGVILQHSGATKELYDNL YETLGLSKGGLAIVTIIFGTILATCLGVI  
AASVTILTMMALKPMVTKGYDKALASGSVIAAGTLGILIPPSIMLVVYAPQAGLSIGQMM  
IGAFFPGLLSALYLLYVGIRCYRNPQLGPSIPKEEMSPFTAKRLWGLVKSLLPTIVLIF  
AVLGTIFAGLAPTEAAAIGCLASIIAIIYRKFSLELLKKA AIETLRVSAFVVMIAAMS  
YAFVGFMSAGAGDVVAKLILSVPGGK WVSFAVIMLIVFFLGMFIEWIGIVFIIVPVFSP  
IFVKLGFDP LWAGLMVCVNLQMAFMTPPMAMSIFVLKGSAPPELGITMKDIIRGVLPFVG  
LVMIALVLLTIFPEIITWLXQKMLGK\*

>SPSA8\_v1\_20043|ID:41144872| conserved membrane protein of unknown function [Spirochaetes Bin 1 SA-8]

MGALKKIVKTIDTISEKSGQIGKWAVALV VIGAYDTITRHHFNAPSDWAYDMLCMSGGA  
LYLLGASYDHAHEAHRVDIFFNMLKPRTRSLVN VIAALLFFFPLIGMLLYMGINWAIKA  
VRVNEVMFTSFWYPPAYPYRILFVIGIFLLFIQGIANFAKDLYFLIRGEKID\*

>SPSA8\_v1\_20044|ID:41144873| conserved exported protein of unknown function [Spirochaetes Bin 1 SA-8]

MKTRKAVVLLVLLAVLPMAMAQTKIVWKSSGHGPASDPSQIFHDEVCKAITKATGGRLE  
IKPFVGGIVPAYKELDAVNENVLQMA YTCPMYNLDKWPAAGLISSRPGALANEVLRSWF  
DYGGGADXMNKMMAGYNVMTFPGALSPLPEEVFLH SKVKITKVS DIKGLRIRAMGDGGEV  
MKKLGASVVIINGGDVYESMQRNVIDAFEYSTLASNWNMHFNEVAKYVILSPIRAPS DPQ  
VFFVNKTA FEKLPEDIQVIVQEVISSYTQKQHEYLIAESIKALQKFKDAGCEVYRLPKEV  
EDAVAKAADEFYTEKSKKEKPIFAEIYNSMKNYG IAYDSMK\*

>SPSA8\_v1\_20045|ID:41144874| conserved protein of unknown function [Spirochaetes Bin 1 SA-8]

MRTIITLIENSPGEHLSLKSEHGISFLIEKNGEKILFDTGQSEAFIHNAEKLGKDLSDV

SQVVISHGHYDHSGLRSLAINSSFTFVAGNGFFRKKYATDGKSF EFLGNDFDEQFLKD  
NCIPIRISSPLEKILPGIFALTA FERKYPDETINPRFVLD TGTTFIPDDFSDEISLAVE  
TDKGFILVGC SHPGIKNMLDAAASRLPGPIYGV LGGTHLVEASDRSLAKSIQYFSDSNF  
GALGVSHCTGKKG TQELERSAASFFRNTTGHAIL\*

>SPSA8\_v1\_20046|ID:41144875| GntR domain protein (fragment) [Spirochaetes Bin 1 SA-8]  
MLEPKAAYYAGIKALDS DISGILKVCAEFAEKAPSNNIPELIQIDEQFHNEIAKSTKNRT  
LSILMKTMAKSLPVGWISLNVPGRIEKT VHEHLSIAQAIQEHS PQA EQHMTIHLQNAQ  
HDIISFMESR\*

>SPSA8\_v1\_20047|ID:41144876|pyrD| Dihydroorotate dehydrogenase B (NAD(+)), catalytic subunit [Spirochaetes Bin 1 SA-8]

MSADLSVRIGNLLLKNPVGVASGTFGYGLEYENLVAIDELGALYTKAVTLEPRAGNPPPR  
LVETPQGLINSIGLANPGVEAFITEKLP SLRTRSCAIVVNVAGSTEDDYCAVIEAIEKAA  
PLSAKGRKTGVDA YEINISCPNVKHGGMAFGTNPQQVQSLTGRLRLLTRRPLI IKLSPNV  
TDIAAIAMAAEAGGADAVSCINTLVGMAIDTETCKPFIAMGTGGLSGPAIRPVGVAAVVK  
VAKAVSIPVIGLGGIASASDALEYLLAGACAVQVGTALFSDPQAPHKILEGIQTWMQRKG  
IERVTDIRKMLKG\*

>SPSA8\_v1\_20048|ID:41144877| putative Dihydroorotate dehydrogenase B (NAD(+)), electron transfer subunit [Spirochaetes Bin 1 SA-8]

MNVSRQFTA AITSIHEIAPSWYLAGFSWPRDLALPQPGQFFTYNPSLLPGAGKSLLRKPL  
AFAGFEDQRAYTVFQARGEGTKALAQLEANEKLDLIAPLGN SFPQCDETEKAFLVGGGIG  
LGPMLYLASEFLSNHFD FEVVLGFR TMAQVPDF SACINTAPIAATLQAIMKAASIATDDG  
SSGFKGT AIDLLKEKAFGLSNTAD FQSNDEK KLTKNHVHLFGCGPFPMLKALHNLAGQYQ  
APAHVSTEQWMACGVGACHGCVLPASGGGYVRVCADGPVFCSDAIDW GKCP\*

>SPSA8\_v1\_20049|ID:41144878| conserved membrane protein of unknown function [Spirochaetes Bin 1 SA-8]

MSAILDIAVLLAFLGGGAVA AKSKFTPSGKVVD SIIRWVLWLLLFSMGLRIGNNPVLYAN  
MKTMGAVALATAILTVLGSVA AVFLAS MVIPGMKKEPAK GKSASSVMFLAHLRAPLFLLA  
IVIAGFSAGILLPAVRFDIGIITGWTLNALLFFIGMQFALSGIDLKDVLPATPAALAVPLA  
TIIGTFGGSLVLT VLFPI SAGKALALGGGFGWYSLSGVLISNLGDPVLGSTSFLANMFRE  
SLALILPFLGRSRVPSLAVSVGGATAMDVTLPLIEQSAGPWIVPLSFMSGAILSLIVPF  
LVPLFFRLG\*

>SPSA8\_v1\_20050|ID:41144879| conserved protein of unknown function [Spirochaetes Bin 1 SA-8]

MNQEAVYRILLETEPTSPFTLVFSGREN RKVNGLYKPD SAEIVIHNRNFDS DNQLIYTA  
LHEYAHLHLCRNAGLSQARPH TQEFWAIF HDLVSKAEGKGLYKNVFETEPEFQELTRQI  
KERCMRANGEILLEFGRLLSQA AALCRTHKMR FEDYIERVVGIPRATATAAIAAEQIGLD  
PGLGWDSL MFVSKIKNPDDRAQVIESLSAGASPTAVKGMLKSEQLPDNSEERLLKEKHRI  
ERSIENLTRKLEDIEEALSAIQA\*

>SPSA8\_v1\_20051|ID:41144880| Uncharacterized glutaredoxin-like 8.6 kDa protein in rubredoxin operon [Spirochaetes Bin 1 SA-8]

MSVVIIYTT PSCSYCRLAKDYFRQNGITFTEYNVAADMRKADEMVRKSGQMGPVIDINGR  
IIVGFNKPEIERALHR\*

>SPSA8\_v1\_20052|ID:41144881| exported protein of unknown function [Spirochaetes Bin 1 SA-8]

MGMRAGLKMLIFWLCAFSVGA AESSAYSQTTEGRLVLEPENTTTCV SLLYRFSELKEHFE  
LTARMIGRVSALSELWSPHDAGGAFQLRWRSLSAFLGEGAPGTSRAFRSSSGSLLGTGM  
LWSFSNQSESGESPKILMGFDSPYLRVFRFLEYS AEYPSTNVLVEPEYATSGVEFSLPI  
SHGLVSISGSMLHPAIQPSGAGLKYPSY WASLYSLSNFKAADVGIWAGWSRGYITPAGIA  
AALEMRFGT MKTGSQKPPPFWYFMQSHIFAANEWYTTYRSAFP GQDFYFRQYVSASFGE  
RLYSSFSAWSIFSGSLLRIFDPSVSVFTKYAWLWALDGADEKLAVSIPGWFLQSRFSWD  
RNLRLRIEPTLRERPFLLGGRLTFLLSLKADKTTDDPESGGSDDSLDFEPSVEGDFENSI  
LDVAGTSPHLPLAIQSALFQIRYQQQIYASGDSRLTG SFSGTIKLP SLNEGTL SPEIQIA  
GEMILKAQKNATLAIKGAAMKIEAMESLSFTKASVSVSYTWKSSS\*

>SPSA8\_v1\_20053|ID:41144882|pncA| Pyrazinamidase/nicotinamidase [Spirochaetes Bin 1 SA-8]

MKRALIAVDIQNDFCPGGALAVPGGSDIIPV VNKLEIIPVSVLTQDWH PAGHISFASTH  
GKPDYSIDDSEKNLGVLPVHCVAGTHGADFH PALESFRGKLILRKGSTFDLDSYSAFFE  
NDHCTSTGLAGWLREREIQQVIIAGLATDYCVLYTAMDSVRLGFATSIVIDAVRGVDASP

GDAERALRTMEAAGCTLLLSNRIDK\*

>SPSA8\_v1\_20054|ID:41144883|pncB| Nicotinate phosphoribosyltransferase [Spirochaetes Bin 1 SA-8]  
MKKHTTSALFTDFYELTMAQGYWKRGLYEHRVVFDFYFFRRQPFGGGYSVFAGLGLSVEAL  
QTFSFSEHDLEYLESLSIFDTGFLDYLNFKFEGTLYA VREGEVIFPQEPVLRIEGNLIQ  
SQIEGVILNTLNFQSLVATKSARVWLAANKGKIMEFGLRRAQGS DGAISATRAAFIGGA  
AGTSNTLAGKLFNIPVMGTMAHSWVMSFPSEIEAFRSYASIYPDATTFLIDTYNTLES  
GINAITIGKELASKGHSFGVRLDSGDIDYLSRQVRQKLDEAGFQNAKIVVSNELDETHIEH  
LVAARAPIDVWGVGTNLVTGGNEAAFTGVYKLAAMIQDDGTAKPVMKVSDNPEKSTNPGI  
KNIYRLYND CDSARVDLITLGDEAPLPDHEITVHHPAGDYRQVKIAPSRVEPLLKKIMEN  
GILMEPLPDLKASRNYFSERISNFDSTYLRFLNPHIYKVSISTHLKELKLSLIKKYMRKH  
\*

>SPSA8\_v1\_20055|ID:41144884| Transporter [Spirochaetes Bin 1 SA-8]  
MSDVKRDSWGSKLGLILAMAGNAIGLGNFWRFPYQAAKNGGGAFMLPYFIALIFMGIPLM  
FVEWNLGKTGGRYGHGTLGPMVYLQAREKLRPKSALWFGVLAGGLAFS VVVLVNSYYNQI  
IGWTLGYSWLSLTGGYADKAKSTVDVFLDYIGSPVNMIFWVISLGALAFAVMRGIQK  
GIEAWAKIMPLIYVFGIVLIVRTLTLGSPVNPDWSPKIGLEFIWTPRWADLNWGAALAAAGQ  
IFFTSLGMIANYASYLKRDDDIVLSGFTTVALNEFAEVILGGTIAPIAFAFLGPDG  
VGQSVGLSFIALPNVFRMTSGGSFFGAFWFLLLFFAGFTSSIAMFNLYLVALLEEDMGIDR  
KKGSWIVFALYIAVGLPVGIEPMLIRGSTAYLDSVDFWVGNVYLIVLGLIEVAVL  
GWMYGGKKGLEQINNGSYWKMPKWFYALFIQFLTPVLIIVFLVGFISQLKFDSL  
VASPWAVAGQIVVAVLIIGIFQTYKAITRTYKKEISANKVLVVK\*

>SPSA8\_v1\_30001|ID:41144885| protein of unknown function [Spirochaetes Bin 1 SA-8]  
VKQSWLXISRRSEMEETSFDXIGLTGKQKALRDSFASLLQKPRSEN RDSL TETEGIAMLK  
AMDIALPAHRFVSGSAEYHGIAESSGSEVLFPGAKAVVKVISPQILHKTEMGGVDIVENN  
PEMILASIRAMEERFASFQVEGYTVNEFVQFEPKLGHEIIFGYRFAPDFGPVVSFGPGGI  
FAEYLAENFKTGSANVFFPSPLATRDLVEQTLAHNVVYGLLCAGLRNTKPVITGSELVDA  
LMKFIEAAPAL AASGISEFEVNPMVISKRSGKAELVALDCLVKKLDFSAMGLAQDADGVP  
VNPAQKTRPTANIDHILKPQSAAIIGVSEKGMNNGRIILRNLL ENGF DARRLYVIKAGVP  
DIDGCRCVPDIGSLPEKVDL FVLVIPASGTPETLAQIAELDKAWSVIVIPGGLEEKSGSD  
AIVARMKKSLEDARAQKGKPLINGGNCLGIRSVPGKYNTLFIPEHKL PMPKGR LAPMAVI  
SQSGAFAICRISKHPDINPKYTITCGNQMDVTIGDYLEFLAQDQEIRIFAVYVEGFKMLD  
GLKX

>SPSA8\_v1\_30002|ID:41144886| putative indolepyruvate ferredoxin oxidoreductase beta subunit [Spirochaetes Bin 1 SA-8]  
MNYNIILAGVGGQGGLSVSVVIARAAMASGLQAKQSEVHGMSQRGGEVLAHLRIADTEIQ  
SPTIPRGDADLILAFEPLEALRYLPWLSADHGVVVTASSPILNIPNYXDLELVXNEIRAL  
PRHRIIDADTIKAAGSXRAANIVLVGXASDLLPIAPEAIEREISQLXARKGEAVVAXNI  
KAFRDGRNKF\*

>SPSA8\_v1\_30003|ID:41144887| Indolepyruvate ferredoxin oxidoreductase [Spirochaetes Bin 1 SA-8]  
MHVLVLSGDEAIAQGAIDAGLSGAYAYPGTPSTEIMEYLQDNLD RYKARIAESERAAVVA  
QWCSNEKTAYESALGASFAGRRAMVSMKHVGLNVAADPFINSALVRIKGLLVVVADDPG  
MHSSQDEQDSRVLADFARMPCFEPDQQA YDMVREAFDYSEKHEVPVLLRITTRLA HAR  
AAVKTA AVRQPNPLSKSDDTMSWILMPAMARNRWKILLEKNRQFEKDSEAAAPFSLRSKK  
LGVITCGLGLRYYLENEADWSATNDGEMPSHLHIGRYPAGKEKIRQLAASVEKLLVIEEG  
YPIEREIRGVFSAPVPVLGKLSGEIPLDGELSSDSVRRALGLAQKASVQLPGISIPARP  
PQFCQGCPHSDSVTALKEALKDEAEFFTASDIGCYTALSALPPYSAVETCVDMGASVGMAR  
GASTVGQKKA VAMIGDSTFYHSGMTNLLDAVAHKTPMTVLILDNSTTGMTGAQPTISPGS  
RLPELLAGLGV EKEHIRELEAHRRSHEANVKVMKEELD YDGVSVLIMKRECIEYLKKARK  
A\*

>SPSA8\_v1\_30004|ID:41144888| Glutamine synthetase, type I [Spirochaetes Bin 1 SA-8]  
MKLSAWNGEFADIDYLSLLVIDIDGHLRAVSLPKSYVNEKVLKKG VGF DASNFGFAEVHS  
SDMVAVPDLSTAFIEEKDGRILHAFCTVNLNNGEPFAQYPRTVIARAFEKIKASGIGDD  
AMALVELEFYVFDVRYSTTFDHSYFVENSEGIGEESEDQPRFGLSKWYHRVSPQDSYQ  
LLRNRAVKMTDAGIPVKYHHHEVGS SQMEIELDFISISKVADMVTLAQWILRNEAEELG



LKVTFMPKPMYKIAGSGMHVHQFILKNGKSIFPGEKMYGLSDEGLSYIAGVLSHALAGSL  
LAFSNPSTNSYRRLVPGFEAPVSATFAQGSRAAAVRIPGYLGKGEARIEFRTGDATANVY  
YFIAAMMLAGIDGIVKKLDPIALGYATDKVTAKNTPMGLYHVLNGLKKDNSYLEGVFPK  
ELISEWIRKEKEAEYVYNAPVVPQEYEL YF\*

>SPSA8\_v1\_30005|ID:41144889| protein of unknown function [Spirochaetes Bin 1 SA-8]  
MDPQIKKRIDSALAKVKEPQSDVPIVDLGLVEKVTYSEKEKTIILTLVSGIVPYECPACS  
AINGVVKEGIIRRAQEAFATEFPELTVIVQ\*

>SPSA8\_v1\_30006|ID:41144890| conserved protein of unknown function [Spirochaetes Bin 1 SA-8]  
MNMNPFLLTAILLGVGATINYFLGVKKNRWLGKAMSTQAENVLNPKETEYVNIGGAIGY  
NIKYKLDPWREAKGTFTFFPRHSLLYMPFSLAIGGSDRFFLNLFTRKLAGEGHIEKK  
YLKAKIDGFQEMEKAEMSRDGREFVLAWRHGDIKDLTRTLMAMPDPQSLVHFTCFDGN  
KTFFLFLKPKKGNIEKNLRVFAQCSEFFR\*

>SPSA8\_v1\_30007|ID:41144891| Arsenite-transporting ATPase [Spirochaetes Bin 1 SA-8]  
MKNTAFFLGKGGVGGKTTLSSAFALELARSGRVLIASLDPAHNLGDTLYTKLNGQPRAVE  
KNLDALEVDLSEWVEKYLEESRQQLKENYSYNMTLNLDSFFSILKYSPGTEEYAVLWAI  
DVHCRLAPNYDIVVFDTPPTALSVRFLSLPFISGLWVAELSKLRERILEKRQTITRLNPE  
SPVAASCVDKDDDKVYGKLTNIRQLAALATLFSKHSFMSVIVNPDDL SVYEATRIKDEL  
QRLELPLAALCINKQGVSDAEWKLSAELSSLPRFTFDFTRDGIHSREDLAKIGLKPLVQL  
FFKEGK\*

>SPSA8\_v1\_30008|ID:41144892| conserved protein of unknown function [Spirochaetes Bin 1 SA-8]  
MERKLHHILKAAFHTAIQVNREKATAIIEFEVKELENIFSLVLGGFAGLPSPTPIAVE  
LLPYMERELTILLSRTDLSQDPLATLMDMLQID\*

>SPSA8\_v1\_30009|ID:41144893| Carbon starvation protein CstA [Spirochaetes Bin 1 SA-8]  
MSTIIALIALAIYLTFFYFVYGRIVRDKLLKSNEAPEAPSKRLSDGVDYVPTSKYVLFVGH  
FASIAGAGPITGPAMAVAWGWLPGLLWIWLGNIPLGAIHDYLAALASVRYDGRSVQFVAQ  
DMMGKKAGKTFGWFTLFLCILVVAAFGDIVAGQFAADGRVFWAFVFFCVAAVISGYFMYK  
TKLGLSWG SVIGVILVIAAFWLGNQFPVKWSKD VYFLIIFVYIVLASTLPVNLLLQPRDY  
LSSFFLYFGLLVGGISALISFAPFTSIPAVTSFSAKLIGPAGNLQSPFWPTVPLIACG  
ALSGFHALVASGTSSKQLKDEKDALFVGYGAMLTEGFLSTLVVTSIAAFGAAALGEKLM  
TPALGRFVQSF AKMVSTNLPFLPMSFMTLFAAVVWVSTFALTTLDTTNRLGRYL VQEMALP  
LKDKNPGLFKFFENKWWASIAIAFVGIFLARSGGYTVLWPAFSGANQLLASVVMLTVAVW  
VKRKLNPAYVASVLIPGIFLWVTVTAALIWYEVAIIPVFFVDMSKSMNVITGAVVGAITL  
FMLILNFIMVGSFLKNWKTQPAA\*

>SPSA8\_v1\_30010|ID:41144894| Diguanylate cyclase (GGDEF) domain-containing protein [Spirochaetes Bin 1 SA-8]  
MSQRKSAEELGNGYYWVGSETFAYNFQSNPYLFLNGDDAVLFDPGSTIDIKEVVKNIESV  
TSLDKIRYVVLHHSDPDIASAVPYLES LGMKFTIVTHWRTWTLVRYYGVASPVYLVDEHG  
YSLTLGNGRVLQFIPTPYLHFPGAIVTYDRQTGYLLSSDLFGAFSNAWSLYADENYVEGM  
KTFHEHYMPSNDILRPVMDLLGRLEISMILPQHGSIIKKNIPEYIEILRNLD CGNLTRLA  
HKDLSSDGGYTAPANAVIERAKGLFGAETVRILGEKLGTLDDQASRILDFPMSGEELWN  
RISEELYLLHG VKALIVLHPLILKLSQEYGIIVPKIFNSALGESQLEKDKLAREIARIEE  
INRQLMQSAGKSQDSMMKDTVTGLLNEAFFRNFIDEEAAIALGMEGSEDDVLA VIGVDEG  
LARIEYQYGPREEV EILKGVSRVIVEQKRENQVAFRLHGATFTLWMPRILFHEANDICDK  
IRKMVEDSKAFIEPITISIGLAAA VEIKSMTEEKMENAGSALTELGLRRLRLARKRGGNI  
ICSSSEVGN DIDTKARILIVSDPDVADVIKTFL ENADYFVAEASDGDEALRKISEEGFD  
LIISELMIPKVDGFMLKEALSHRSGTKDIPFILLSHLKDEKSVIRAYNLGINYYLRKPF  
LAELLGIVQNMPLSGEGK\*

>SPSA8\_v1\_30011|ID:41144895| Glycosyl transferase [Spirochaetes Bin 1 SA-8]  
MNLQIEQILVAAAFLLWLDIFIVIRTYLNKTHLQLNANRXAQLAELAHLEANTDWDKK  
KVRRLFTNYLQLKQSIDLPEKERMRLNLAGADRIEQLNRQIRSPSRYKRMEAAALKLAL  
ISNDSARLT LQKALLREKDYPVRLFFANALADIKDPRCIAVLAESLLGAHRWYRDXTNML  
IXSFGMASSDYLRGYLWRTESEIQEMLIDVAGQCVCENLKQYLDDFLHRGQSEIGKLTLS  
VKDCSEHSCAYCAYGRKLTEDLRRHCRYHGIVESNFKCSHYRFMVTTKDPANNHHRMLMVK  
AAETLARYYLDLNNQYYLEFPDREIRNLAVKSLSNSNKGENVYKLIHYLSDDEVSQSAR  
QGLSLILTAHPRLIPLVVEFFKAGDKRLKQHLAEVLAGRIEYFIYKLGKDRERYELII

QEVISLGGKFSQIIEFLKINKDIEIENAVLKIIRDDITQNEALARECGLYLPDRILEKLG  
ARQVPPVVKRQEKMDWKMVRGLYVILFFALAFFPFLYIVRYSDRIWSIPFISQLKTFVVD  
FNYDFAWYSLTVNAIYLVLALSAMQVTIATRLWNLKTMMLFKPRMLPSVSIVAPAYNE  
EKTIIESANSLNLKYPDYELVIVNDGSRDNTLNTLITYYDLKRTEYHFQQRLKTKM  
IYTNPPLPRLIVVDKENGKADSLNAGINIASKEYFCGIDADSLEPDSLLKVAALS  
LDHGIETPAMGGNVFPINGCEVDRGKLM SIGLAKNNLAKLQTI EYLRAFMCGR  
L GWAQINSLIISGAFGLFRRERIISIGGYLTSSERYQKDTVGEDMELVVRISRL  
MREKCLKYRIGYAYNANCWTEVPEDMKT LKRQRDRWHRGLIDIIFHRKVF  
NPSYGKMGLLGMPYYLIFEMIGPLFEIQGYIMVFLAAIFGLISTKLALLL  
FVSSILMGLISMGSVLAERQLYFNYRDTLKMLLIAFIENFGPRQMFS  
LWRVLGFLNAMKKPTGWGKMERKGFPAAGAAEKPAQPPAEPKKG\*

>SPSA8\_v1\_30012|ID:41144896| conserved protein of unknown function [Spirochaetes Bin 1 SA-8]  
MLIKNVREHSRLMILSILLIAVTIAAVLLFLAPFVIWQIQPYRPMNIWVVDKTVPPDYR  
EHQGLFWVLKNEKIAKPGSRKLYDEKSDYFGFYPGKNEWRESPLPPSGPRDLIYLADT  
YGVYKDDYMQRRLSGEISPKIYGGLNANDNEVIKRN LGANNTFIAEFNTAASPTNAFDRR  
NLGRLLGVKWSGWIGKYFENLTRGQEVPRWV VANWEEQNKQEWNY YGRGFVLISDSDEVQ  
IFTMEDDVGP KGLKFKYRDEWAELLKSRKEISYRYWFEWVQPDLSIETVADYHFDVTARG  
KERLEKMGLSAVFPAVVRYKNPQYTGWYFAGDFADLNFAKTSHSVWGMQWIKKLLVDDSV  
DSNVYFYWNA YVPLMHKILADIQA AKIARLSMAEENKEPEVTVRAFGKGFQVLGKDGAWH  
DLFIRGVNMGLAEPGKFFTEFPEDMATYLRWFDQIADMNANSIRIYTLPPPEMYKALYAH  
NTQKPKDAIFFFQEIWPEEHPPNEDYLAREYRESFLKEIDYGIDAVYGRANVPERKGRAF  
GIYTADVSPWLLGWLVGRELESSEVMATDARNKGVSYQGT YVYSGKNATPTEVWLAESLD  
EVA AIEANRYGKLHPVAIVSWPTLDPISHDSEWDPVTGKKNKGNDRASV SIDHFEITPAM  
KAGLFGAYHIYPNYPDFINNELSYGLYKDEHGVLRYGGY LREFMQGHKRYPALVAEFGMA  
NGFGIAHFAPDGLHHGGQTEEEAGRDILRMLAAIQREGYAGGLIFEWMDEWVKKTWTEY  
LMIPYDRHVFVHNAMDPEQNYGLLANDVVPKEKPEMVLPGQ GKISSISIAADASYLNLEI  
QLAKALDFKSEELIIGLDTLGRQLGQMRWPAGNLQTKSGMEFVVRLSAQDKADLLVIPS  
YNSAESRFATIRLWDGSYERINMLVNGKVTTKDGREIPEKRFDASALRKGIFDESGNLWYT  
EGNKIFIRLPWTLINVTDPSSLKVLQDNRTTFFNPERDALKVQTTDGFVFD AIVWDKGGK  
STTGLSSNVDPYVWEGWESTPPYRERLKKSYTIIQKDWANYLHEL SALR\*

>SPSA8\_v1\_30013|ID:41144897| protein of unknown function [Spirochaetes Bin 1 SA-8]  
VFAQYIQSMTEKNILSSEAFANVSIEFPIQFDLKIIYLTAEAQDLESGLERLLAELSIPC  
SLIQGISVPGK KYGKLGARVTVSSRETMDSLYAGVAKLPGVKFAL\*

>SPSA8\_v1\_30014|ID:41144898| Peptidase M29 aminopeptidase II [Spirochaetes Bin 1 SA-8]  
MKDPRVAKLADILVNYSIKAKPGDKVLIQDTNEEPEFVTALIRAVHKAGAHAFVTLRNKT  
IERELYHEGQEEQFALQAEFEAARMKRMDAFIGFTSLRNAYAWKDIPSEKMDLYNRYIWK  
KVHIEQRIPHTRWVRLYPSAAMAQNAGMSEAFEDFFFNVCTMDYARMSKAMDALVEKL  
KATDTVRILGPGTDLKLSIKGLPIKCDGTMNIPDGEVYTAPVRDSVNGVLSYNTPSEKD  
GFKFENVRFEFKNGKIVDAKANDTARINRILDIDEGARYLGEFAFGINPFIRAPLLDTLF  
DEKIAGSVHITPGNSYDDCFNGNRSSLHWDLVLMQDPESGGGEIYFDGVLARKDGRFVLP  
ELEGLNPENLM\*

>SPSA8\_v1\_30015|ID:41144899| putative ferredoxin [Spirochaetes Bin 1 SA-8]  
MADKSAKNPGSAAGPWYVDSSCIGCSLCAGTAPDTFAMSDDGSVA VVIKQPEGADELELA  
AQAMTDCPVSAIGNDA\*

>SPSA8\_v1\_30016|ID:41144900| conserved protein of unknown function [Spirochaetes Bin 1 SA-8]  
MRTIIRIDQELCNGCGACETGCPEGALKIIDGKARLVGESLCDGLGACIGHCPQGAIQTI  
QTEAEDYDEYAVMAKVVPQGESVILAH LAHLEHFGQDVYIKQALDYLEKHALPVPEGYSA  
SKPVLEPKKISFSKPCSPDVRPMKAIGTSGTIRDKAASSTVFPEKPSAPSALSHWPVQLH  
LINPRTSSFNNADV VIAADCTAFALGSFHTDILKDAPLVIACPKLDSGREIYLSKLA SII  
SQA KSVRVVMEVPCCSGLLRLVREARTISGRSIPHSLVIGIDGGFVARNSD\*

>SPSA8\_v1\_30017|ID:41144901| Heat shock protein Hsp20 [Spirochaetes Bin 1 SA-8]  
MNNTLYGTNPFDLMDRFFSNDDFLYPKFRAPAIDVREESDKYVIEAELPGLSEKDIKLE  
LKDGILSMSTAKKEAKEEKNDKLRWIRKERREFRFSNSFALPEDADA EKIEAKFKDGVLS  
IILPRKPESAPRIVPVKVA\*

>SPSA8\_v1\_30018|ID:41144902| Extracellular solute-binding protein family 1 [Spirochaetes Bin 1 SA-8]  
MKRIVALFAVLLLAAGFVGAQQKVGVYTTLEEPLAKELFDLFQKETGIQVNWQRLSGGEV  
ETRLEAEKANPQASIWVGGVGLNHMSAKMKGLTPYKSKLLENTPEYRDTENYWVGLYL  
GPLAFITNNKVAKEQGLVPPKSWADLLKPEYKKGKIRMANPTTSGTAYNVITTLRYVFNND  
EEKVFDYLLKLDANIDQYTKSGSAPGKSVAIGEIPVAIGYAHDQVKLKEGADVTITIPA  
EGTGFEIASMSLVKGGPDVNAKKLYDWILQPKAQEIIAKWYVPLSKLAKKNPVAFSMD  
EVKTVKQDIVWDSNNKERLLGRWVKEIGSKR\*

>SPSA8\_v1\_30019|ID:41144903| Binding-protein-dependent transport systems inner membrane component [Spirochaetes Bin 1 SA-8]

VFTKKRIIFVTACLIFLAADYWMFSTVKASFVKSMTQNAKMLASAVARSVPEDPDQSKE  
WLASLSQTYPGYEFFYTRGLPWEDGYEEVGGNADIAQFWAQNKESPAIAQGLDSVSYLET  
YIVPGSFHIGPTNSTMIMTPVPNANADSAAGLIIAMDASRIGGFVSLINALIVIAFALF  
ALGFGVATFSRDPISGYAILVLFTIVLAFVAFPLFEAVRLTFMKNRFTLEVWKAILGNV  
QYLKALWGSVQLGIFTASFSTVIGFLFAFAVSR TSMKGKLLVTALATMPVISPPFSLTSL  
IILLFGNNGLITKQFLGLSKFSIYGLGGLTLVQTISMFPPIAFLTMQGVLQ AIDSTLEDAS  
LDLNASRWHTFTHVTLPLAAPGILSSWLLVFTNSLADFANPLLLSGSYRVLSVESFIEVT  
GMNRISNGAALSILLPTLTAFFAQRWVSKKSFVVVTGKPSMRLSDLASPGTRKALSA  
FVVVVSAFIVALYGTIVAGCFVKNWGDYTFTLANIGEALTRGKQALVSTMTLAGIATPI  
AGLLAMISAVLVVRKKKFPKRLLEGLIMTPFAIPGTLVGISYILAFNKPPLLLVGTGAIL  
VINYVIRELPVGLGEGVAALRQIDPSIEEAASDLGADQATIFRTVILPLL RPAFISSMSY  
TFVRSMTAVSAIIFLISARWYHITIQIYNFSENIRFGLASVLTSTLIIIVLAVFGLMRL  
IRQSEHLEKTVTA\*

>SPSA8\_v1\_30020|ID:41144904|fbpC| Fe(3+) ions import ATP-binding protein FbpC 1 [Spirochaetes Bin 1 SA-8]

MAVQSVPVKLEMVSKTFRDPKTKAEVHAVRNADFEIQGELVTLLGPSGCGKTTTLRMIG  
GFELPTEGRILIGGKDVTYLPNGRETATVFQSYGLFPHLNVEENVAYGLKIRKLD DATI  
QARVKQALALVGLEALAKRSPGRLSGGQQQRVALARSLVVEPQVLLLDEPLSNLDALLRE  
QMRVEIRKIQKSLGITAIYVTHDRIEAMSLSDRVIVMKDGVIIQQIGSPNDIYERPNSV FV  
AGFVGKVAFFPVILESVEPNGSCRCLMEGKLVKAGNKAEDARAGEKAVIMARPESL RLLP  
PEEGLVRGTVTARVYLGSSVEVFVKTA YGEILVQVDDPSGKKIAAEGETVSIDFNENLVR  
VLPEAKIEQQE\*

>SPSA8\_v1\_30021|ID:41144905| Taurine import ATP-binding protein TauB (modular protein) [Spirochaetes Bin 1 SA-8]

MVKLEHVSFSYSLK GKALPVL RDINFQVEKGSITAI VQGSGCGKTTMLRLIAGLNRQDEG  
IITRGDASGSTRPNISII FQNYGLLPWKTVKANAE LGLLARGVKNRTRSA AVAPILEEL  
GLSGFSRLFPLRLSGGMQQRVAIARALTTSSDILLLDEPFSSLDANTRESMQDMLLATQK  
KHGTTVILVTHSIEEAAYVADTVYIASGKNPSTIHERMETS RKS KVLPAEPSRSL SISYQ  
DTS DTSALPYRESAVYFQDVARLRQRFSEIAGSLQDTSQLAETEGILRAGKAGSTGKPRV  
LNPGLRKFNGKLLHLVFAMLFAGLLWQLAAASVQKAFLPPPLSALRRLFELIMSGSLNTH  
TLQSLKRIFLSLGIAGPLAWILGLLSGRHTTIDAVTSPIVYLLHPLPKVAFLPVLM LFFG  
LGDASKVALMGLVIFSQ LFGARDASRAIPQSMIDTVRSLGGSTSFVTRHVILPSTFPAL  
ISSLRISLGTASAVLFLSETFASMDGLGWYIMDAWSRVDYFDMYAAILTSLVILIFLL  
LDLVETITLRWRELD\*

>SPSA8\_v1\_30022|ID:41144906| Nlpa lipoprotein [Spirochaetes Bin 1 SA-8]

MKKTILIMILLVFLGLTADTRIFADSPSAPAPLKL GIFTDADSFPMICEAERIFQEEQV  
IVELVRFQSAIERDSAFHAGSVDGIISDLCAAVLARQGGFKVRITSLTDGRFGIVAGPGV  
KAKSLADLAKKPIGISSNTIIHYMVDSYMKNAGIRQSDISLMPIKLPVRLELLLSGQIA  
AAGMTEPFITMALVKGSTLLASTDEYPLGAGVLVFHERSIEEKTEAIKRLYKAYWKA AQR  
INEKPDSYRSLLAQKAGFSDEAARAFKFITYQKPKLPNQEDIRRAEAWLLSKNLLKTEIA  
PSELVDGRFTAGW\*

>SPSA8\_v1\_30023|ID:41144907| Phenylacrylic acid decarboxylase (PAD) [Spirochaetes Bin 1 SA-8]

MARYLVCITGASGSIYPLRLIAALAAKGAIVHTVCSPWGARVVLEETGRPIGYWLGKVRA  
SGGPCRPAIVTYHSSSEDFSA PVSSGSFRLDGTVIAPCSMGTAGSLASGATANLIHRAGA  
VALKEGWPLIVVPRETPLSLHIRSLQTLKEAGAILPAAPSFYSKPQTIEQLVDSVVYR  
IMDHLGVNNIHA YRWS\*

>SPSA8\_v1\_30024|ID:41144908| putative 4-hydroxybenzoate polyprenyltransferase [Spirochaetes Bin 1 SA-8]  
 MASESSPKASFSVFSRLGTLGDAVMIRHTVFSLPFAVA AVLLETSGRPPLHKVFWILVA  
 AFGARNAANALNRIIDRRIDAKNPRRTASRPLPQGRISELELWLFTAAMLIMLIVGAAMLN  
 RLCLALLPLAGILVFGYSYTKRWTWLCHYWLGIACSAATMGAFLGISGAFHLRYFPITAG  
 VALWVAGFDILYALQDIEFDRKEGLHSVPARFGAKGARAIAALGHAGTILGLASIFFFWP  
 SPGPASAGAIALCATLLAGEHLVSRGGTEKHIRIAAYNINEILPFVFLLGVAIDMYLV\*

>SPSA8\_v1\_30025|ID:41144909| conserved protein of unknown function [Spirochaetes Bin 1 SA-8]  
 MAYSGLQDFISYIESRGELKRISALVDPILTEIADRIMKNQGPALLFEHVKGSKWPVL  
 INAMGSERRMAWAFGAESLDQKADEISGLINWAWSQVRDFSLFSAIPGALPKLPIAKSLL  
 PRKTRPPCRQVIDDTAGFDSLPLVLCWPEDEGGRFFTLVVCVCTMDPETGAQNWGMYRMQV  
 YDDRTAGMHWHLHKDGAHFFEKYRALKKRMPVAVSLGSDPAVTYSSTAPLPEGVWEAIFA  
 GFLRGKSTQVAKASLSDIMVPADAEFILEGYVDPDETRLEGPFGDHTGFYSLPDQYPVFH  
 LERITRRENVPFATIVGIPPKEDCYMAKATERLFLPFLKQLAPEIQDLVMPLEGVFHNC  
 VIVSIKRFPGHARKVMNFLWGMGQMMYTKLIIVLDDINLKDLSTVAWKVFNNIDAGR  
 LVFSEGPLDALDHSSVPRFGTRLGIDATKKWPEEGHTRPWPEPLAMTDAIKELVNRWS  
 EYGF\*

>SPSA8\_v1\_30026|ID:41144910|ybbA| putative transporter subunit: ATP-binding component of ABC superfamily  
 [Spirochaetes Bin 1 SA-8]  
 VENSGSFVVTVENVHKNYALGKTEVKALNGISFTITKGFISIAGPSGSGKTTVLNLIGC  
 VDTASSGTVTVLGQRTDSLDDDKLTELHRGVGFIFQTFNLIPVLNIRENVELPALLDPS  
 ESGMAKKELDAWVDHLIEGVGLADRMKHKPAELSGGQRQRIAIARALVMRPPIVLADEPT  
 ANLDSATGESILELMKRMNREFGTTFFIFSTHDPGIVSIADHVIRLKDGLIVENYRTSGQN  
 GNGRAEVHAGRVLA\*

>SPSA8\_v1\_30027|ID:41144911| putative ABC-type transport system, involved in lipoprotein release, permease  
 component [Spirochaetes Bin 1 SA-8]  
 MILARMAYGNLFLHKAKSLLLGLIICFGIILFVGNLIDTTISGLQSMFVSGFTGDLMV  
 TGPTSFPPTIFGETAGGEEVIPHIAKYQDYVEFLKADKRVAGYLPMLSGQVAMGLGEQII  
 GRGAAFGVNIDEYRKFFSGNIELVAGEWPASGAPPWILISSETSAAMLARSGGKLGPGDK  
 IVLSALGETAGTVIREVTISGIVKFNQSNQQLARISLVDADTLRDLLGFASLRDKAVSLT  
 AEQMEFVTSFNPDALFDDMPVEQEKASETQFQDSQASVSEIVPTPAWQFLLVKTVKGANT  
 GAVMKSLQKFAISLERNDHVQDWVAGAGTIARTAVTVRLVFNLLIVVIAVIVIMITMNVL  
 VVSISERISEIGTLRALGAKKSFIRQMILLETFTLTVLAGAVGLLLGLSILLILKSSGIQ  
 APNLFFEALFAGKVLRPVISSGAALKAFAWIFGMSVLSLSPVAIALRIKPVVAMQGD\*

>SPSA8\_v1\_30028|ID:41144912| membrane protein of unknown function [Spirochaetes Bin 1 SA-8]  
 MIQQIMAVRNSVRQPRRTILLGGAIAFGVIIICLVSGFISGMEKAVQDNVTLFSAGHVLI  
 NGITISESGRAQNRISDATLRERVKALVPEAVSVSQTAAQAQATVVFSGSREQQLRIRGV  
 ESDRLFSGSLVLTGEGSWNEARKERMIVLGAQSAKRFGLGLGDTVMVRLSTASGQQNVTEY  
 AVAAFYDDASSGGMNTALVPVSDLLSDLNMKKGEYQALAVFLRDALLADETAQAVEKGLT  
 AAGYRFIASGQGGAGGVGNAAGGAMSGGAMGGAMNGGAAMPSSALFGGTQISRNPAG  
 TTMVRAVTVTQMSGQTGAVLATIKWIGITVFLVMLVLVAAGITNTYRMVLLERTKEIGML  
 RCIGFKRKDVFAVFMYEALMIALAGSIAGILLSLPLGILVQLIPFDPNGLSGSVLTRGHL  
 VFAPNLGSLALVVAAVLAASCLAVLSPARRASRLKPVEALRTVA\*

>SPSA8\_v1\_30029|ID:41144913| conserved exported protein of unknown function [Spirochaetes Bin 1 SA-8]  
 MINRLSDTRKALVLSIFLLAVLLGASAQGAPGGATGGAPSGGLPPPGRMYGNPEDTTTATK  
 PGSIQEYSAKDFLALVRQTDIRSSFYQSDMSATITMVDVSPERGTRTFKQMIYRRDKDDA  
 FLMITIEPESRKGQMLRVDNNMWRYDPTSRSKFTHTTLKDQYENSTAKNSDFRRSQRSD  
 YSVQTVESGKLGKYDVWIAELKANNDEVFPFFIKMWIEKDRITIVLKVEEYSLSKLLR  
 YSTNYVQIGTSFIPTTQIYQDGLIPEKRTQVYTNISTKPVPPDYFTKNYLERISQ\*

>SPSA8\_v1\_30030|ID:41144914| protein of unknown function [Spirochaetes Bin 1 SA-8]  
 MKNLKPWGIGTLGLLFLVLAACPLEFANAQTSPLALDDDALFGGSNDIVTVIDTNVAATS  
 VVELVKDTKTYPVFLVEGDLGAGLTSSLVPYGASGSDKNLLFGAVHLDSLAFYSPVKDV  
 DFNITTSATLLPNSATDVSVSAVANLRASEYTRFYTS GKYNVSSSSTVVTADGLALDE  
 IFLDTAINRKLFFRLGKQRVSWGVGYWFKPADVLSLAQIDPDNPTASREGPFAFKADMPF  
 GLNHATLYAVPPIDGSFGTFSVAQRTDIVAGGFELSFAGFVRTDMGARPLMFMFTGAIG

PVDVYGENVALWGS DRNYVREKDG GGYEL YRVENQLLFQSTLGLKYSWQNSNGLSASFHV  
QGYNGTGYEDSSILQTTAARNLVKASSAYTSNDLTQAGMYYLGANVSFGARFGEKGLT  
NTTLGSTALFNFS DGSMRFKPSWSLTVGSGGSALNLAVSALTS LGKLYSEYAPQGNMVT  
ALTATINKTVQVSASAPLKLDTDYS LKKASLALS LYWNVISY\*

>SPSA8\_v1\_30031|ID:41144915| Two component transcriptional regulator, winged helix family [Spirochaetes Bin 1 SA-8]

MKGTILIVEDTRELADLYAL YLEREGFSCTIALDAETALPLAKSQSWNLVVL DINALPGMD  
GFQFLEEFKFS AVPMILTAREADEDIIHGLGVGADDFVTKPCPPRVLAARVRASIRRT  
LAKTDDQEANLHFHGFELDAEAL YLTREGHPINLSPREFGILVFLIKARGKSFSP EEEIY  
QQVWGQSF GDISAVGVYIQRIRKLGDDPAAPRYIQTQYGLGYRFNPEMLQ\*

>SPSA8\_v1\_30032|ID:41144916| putative Integral membrane sensor signal transduction histidine kinase [Spirochaetes Bin 1 SA-8]

VRLKTQFFILTGA VTLVPILFGLFLFSFQQAPRDPREPSRIFMASISEKWRLGETLNAQV  
LTEEA EKAGMPLRGVA ILDASG TILVSSFSHLQEGSQATLKDFTPRPRATPDEPKAELKL  
MPLDSKNPSSPYILFDIQPFWSKQDIRNRNILLIGSFVLSLFI LTAILSFFILRSISKAI  
GTIEADTAIVATGNLDHEVAGMGNHEILMLAKSINLMRLNLKDMLARRSKMLMGVSHDLK  
TPIALIQGYADALSDDVAKDEAEKKQYIEIRNKAKQLEDL TEELIEFMKIGGDGAVSVE  
EVA VDEL FISLARRFEADARLLSRNFEWGFGERLEPYPDFPAPKLP MNRLLVERAIENLV  
SNALRYTEADGNIQFRLTSNEQGSSIAIDNGPGIAAADEPYIFDAFYRSSNSRADGGYG  
FGLTIVKAVADLHGWSVRVGRRS DGQRGTEAVLAIIEPGKAKG\*

>SPSA8\_v1\_30033|ID:41144917| conserved protein of unknown function [Spirochaetes Bin 1 SA-8]

VVGRADDGRLVLRGFFSGTDNDCFYKTAKLSAEVNITKLDKPIAKAVVWLDPSEFRXTWL  
GNKAVYRTRMAMADGGELIILAPGLAHFGEDAGIDMLIRKYGYRTSAEIRKAVHDNADLA  
GNLSAA AHLIHGSS ENRFSIRYAPGPSVSKTEIESVGYGWADLERMKTEFAIDKAVAGWN  
IAPAGEPYFFVPNPALGLWTTKERFSLSPSPAR\*

>SPSA8\_v1\_30034|ID:41144918| conserved protein of unknown function [Spirochaetes Bin 1 SA-8]

MTIIEYGSQNT EISSEQLESFVADSIAALGNVRSMIALPPDITRFHSRAGLITDMIARIA  
GPRLKAVMPALGTHVPMTAEIHAMYPGTPKGLFRNHDWRNDVTE LARLDADFISEVSEN  
TVAYDYPVQANKLLVSSGHDAIISIGQVVPHEVVG MANHAKNIFVGTGGKEAIDKSQKPL  
PWRGLWHGADDGESRHTGSSCVQQSARIRQHPAPHSLDIDRGRPR\*

>SPSA8\_v1\_30035|ID:41144919| conserved protein of unknown function [Spirochaetes Bin 1 SA-8]

MKVLRSRFSVGTGDRFGREGIAQIEAFRMLAEKGVDA AIVWNKSNREHIIIGTSPADQRRS  
ADEAIAAAGFKGMYAVDADHIGLATVDRFLPYCDFFTIDVADYIGKPT EPEKMEAF AAKY  
RRLFD D VRCPV SITEADVAAGSRKYL YAIEEAAKVYRRILAGKPDGNFHIEVSMDET DVP  
QSPAELALILAGLADEKVPVQTIAPKFSGRFNKGVDYVGDAAAFEREF EQDVRVTQWAAQ  
ALGLPTSLKLSVHSGSDKFSIYPAIRRIQKTGCGLHLKTAGTTWLEELVGLAEAGGEGL  
EMAKLVYRKAYARYEELAAPYATVIDISMSRLVPKIVD GWSSEEYTAALRHVPSNKAFN  
PDFRQLLHVGYKXAAELGQDYLRAL EAHRESISRNV TENLYDRHLRALFLE\*

>SPSA8\_v1\_30036|ID:41144920| putative Integral membrane sensor signal transduction histidine kinase [Spirochaetes Bin 1 SA-8]

MAEQTEVRHQRRILHHIGIRGKLLAFLAIAVVFITL EIVAQNATYRAAE EYEQDLAHYH  
LVHRLRATLDSFRLNSDRFIKDPNSIPIENLFETIATLNSLSSSLAPVEELSIEAGFEVR  
AIGYGFDAYLPILSRSLSSRASGR TDYYAD FARADRIAGYIDTYLSRLLSILLRDGEARF  
KISSRMKEINKIILIGIAIAGLLSLGYVFLIANSITKPIRKLASASEKLARGELEIDPL  
PRKSRDEVGVLAESFFIMSQNIRLSIENLREKAELEQKLHEEELTLLSMGKALREAQFMN  
LQDQMRPHFLFNALNSIARTALLEKAKATEKL AISLSKLLRATIKEGGPYIPISEEVDIV  
QEYLAFQKARFGDRFEWHIIFDPELNACRIPRFLQPLVENAIRHGVEPKEDKTEILVSI  
RRRGERLRIAVADTGTGMAAEKLAELNLRLRQPFDSVSAKAGSDNLVSANGIGLVNVANR  
LTILYGQEALMRIYSVPGKGTIVRLSLPLKGIARWPESL\*

>SPSA8\_v1\_30037|ID:41144921| protein of unknown function [Spirochaetes Bin 1 SA-8]

MARILADDEELERAALRLIMTEMAPGSSHEIYEARNGHEVLQLAAAQPF DVIFLDIRMP  
GLDGL ETAETLRSGINTPIVIISAFDTFAYAQA IKLGVY EYLLKPASAE E VLSALGKS  
LESTSGGMDNPARTLQEAREQLRRQLIDQLQRGIPDSALFTEYEK LASLEKKPRTAFAAR  
LEPNTHFGRIASAILSSALYAAQNILASQRTSFLASVNESALRILVYAESQAELETYVSN

LVPENKRRLLSEFSANLLIGVAGPGRSAQLLERADEALMLAKPSNPLIKLSEPASIEP  
EQLVHLSGQRNPRSLGLRALEYIRTHYNQDISLSSAADALGVNPFHLSHAITRELGIGFS  
ELLARMRTNKAKELLAGSSVKEAGYLVGFSDQAYFSKVFKRFQGISPGQFASKTAKKYK  
KE\*

>SPSA8\_v1\_30038|ID:41144922| TRAP dicarboxylate transporter, DctP subunit [Spirochaetes Bin 1 SA-8]  
MKKATFIIIALLIAAVLMPMQVFAQKTIVLRLAETHPQDYPTTRGDYEFARLVKERSGGR  
IVIEVYPGSQLGQEKAVIEQVQFGAIDLTRVSISPVAAFVPRLNAFQMPYL YRDETHMWK  
VLKGDIGKELLASLEPFGLGWFESGARNFYNSKRPIRTPADLKGLKIRVQESELMMG  
LVSAFGAVPTPMAFGEVYSALQTGVVDGAENNWPSYFSTSHYEVAKYITLDEHTRVPEII  
IGSKISLGRSPADQELIRQAADFDAIDFQRAEWAKYEKISIDKTVAAGSQVVEIADKSAW  
QALMAPLYAKQSKEIQALVERIKAVK\*

>SPSA8\_v1\_30039|ID:41144923| Tripartite ATP-independent periplasmic transporter DctQ component [Spirochaetes Bin 1 SA-8]  
MILRQLAFLFIFCKESTMKDLILRTINFFHIVLVELAKLMIIGMVMIVFINVILRYVFNS  
GIIWSEEVALLLCVWFIFISFGLGIKQRLHITINLLRKDKISPPLDAILDLMAELIVVFI  
GMIMIIYGARLVQFTMRSIMPATQWPAGILYLVPFSGLTMVLEAILHLLRWDTYDQKID  
DYLSGKGGKLDIFGGNHG\*

>SPSA8\_v1\_30040|ID:41144924| conserved membrane protein of unknown function [Spirochaetes Bin 1 SA-8]  
MADPVIASITLLGGFILLILRIPITFALASVSILTAMYLNIPLMAIVQQMVQGVRSFSL  
LAIPFFILAGEMMGQGGIARKLIDFANILVGRVRGGLAMVNVVESMFFGGISGSAVADVA  
STGTIMIPMMKMQGYDDDFSVAITVTSATQGIIPPSHNMIISLAAGGVSVGRLFLGGF  
VPGVTLGLSLMIMSIFISIKRNYPKGEKISFKQALKTTKDAALGLLTAVIIMGGVISGVF  
TATESAAVA AVYAFFITFFVYKEIPLKAMKILYSTLKTLMVMALIASASAFGLWLMAYL  
RIPAKATQLLSITSSKVL LLLLLLINALLLLLGMIMDMAPLILIVTPILYPVVVTTLGMSP  
VHFGIMLMLNLAIGLCTPPVGSALFVGCAV GKITMERATKAML PFYLTMFIVLMLVTFIP  
EITMFIPNLIMPGN\*

>SPSA8\_v1\_30041|ID:41144925| 3-oxoacyl-(Acyl-carrier-protein) reductase [Spirochaetes Bin 1 SA-8]  
MSFVESMFSLDGSVA VITGGAGGLPRSLAVAFKAGARVCLWGRGTNHPIEDAVVSVKAE  
SSSPDVFGVTVDADSQACEHAYDVTVKQWGVHPAILLNGVGGNRGKSSFVDVDETVFEE  
VLKLNLLSGLVTPTRVFARRWIEHGKGNVINMTSMTSYKALSGVWAYDAAKAGVLNLTE  
ALAKELAPHHIRVNAIAPGFFVGNQNRSLLYRDDGELTERGKAIARTPFGRFGEHSELW  
GAALFLASDQASGFVTGVSIPVDGGFLADNI\*

>SPSA8\_v1\_30042|ID:41144926|uxaC| Uronate isomerase [Spirochaetes Bin 1 SA-8]  
MKPFMDKNFLLDTEAARDLYFGQAAPLPIFDYHCHLSPKEIAENKPFSDIAEIWLKGDHY  
KWRIMRSNGADESLCSGQASWEDKFLAYAQALESAGNPLLHWSHLELQRAYGIDDILTQ  
GNALKIRQWANDIIRERKDSPRSMLTRFNVA VVCTTDDPADDLGWHRQIADPEFGTEAA  
RAGKKTTRVLPTFRPDRIMNVQDAAAWKNYAGTLGNAADIEIKDFASLQEALARRHAYFH  
ANGCRLSDHALLTPAFALASEAELNTIIGSLLEGKAADTEAAEKIATAVLIHCARLNAKA  
GWTMQLHIGALRNTNRLFRLYGPDGGGDSISDSNIVLSLARFLDYLDQAQNSLPKTI LYS  
LDATRNASLAVLAQSFAMHGSPGKIYGSAAWVFNHDKDGMERHLVETASVSLIGRWVGM L  
TDSRSFLSFRHEYFRRILCRIVGRWIEDGELPSGEAYADSLVRNISWYNARDFFGMEIP  
RWAKN\*

>SPSA8\_v1\_30043|ID:41144927|ugpE| glycerol-3-phosphate transporter subunit ; membrane component of ABC superfamily [Spirochaetes Bin 1 SA-8]  
MREHSRIQRILPHIYLWIGIIIFPIYFIFVGSSTSAEILAAPMPLKLGPHLFENYRR  
ALFEGTSNMGTPVLVMVKNLIMALGISTGKIIIVSLLAAFAIVFFDFPGRKFCFWAIFIT  
LMLPVEVRIMPTYKVISDLGMLNTYAGLILPMIVSATAVFLFRQFYMSIPREIAEASQID  
GATPMQFFRSILVPMTRTPVAAMFVIQFIYGNWQYLWPLLITTKTNYTLLIGINRMLSG  
ADVQIEWQIVMATTLLAMLPPVIVVMIMQKQFISGMTETEK\*

>SPSA8\_v1\_30044|ID:41144928|ugpA| glycerol-3-phosphate transporter subunit ; membrane component of ABC superfamily [Spirochaetes Bin 1 SA-8]  
MTKQYEFKAKGLAYLLVAPQMIIVFVFFFWPAAQAILQSFFLQDPFGGKMIFVGLENY TQ  
LFTDKSNGYGQSFVVSVFFAVGITVLAMS VSLFLAVQTNKRIRFETFYKTMLIWPYAVST  
MVAGVIWLFMFNPNVGI A WVLKHKFNVEWSYLLNFNQAFILITIAASWKQLAYNFVFFL

AGLQSVPETLIEAAAIDGAGHGLRFRKIIFPLLSPPTFYLLVMNLVYGGFFETFPPIHQMT  
AGGPGKSTAILVYKVWRDGVVNLDLGSSAAQSVILMLMVVALTIVQFRFIERRVNY\*  
>SPSA8\_v1\_30045|ID:41144929|ugpB| glycerol-3-phosphate transporter subunit ; periplasmic-binding component of  
ABC superfamily [Spirochaetes Bin 1 SA-8]  
MKKIALLLFAVLLVTGTYAQTTFEWHAMTGKNGDMVNAIAEKFNNNSQKDYKVVVPVYKGS  
YSDTMNAGIAAYRAGQAPAIQVYEVGTATMMAAKGAIKPVYQLMAENNEKFDPKVYIPT  
ITSYYSTSDGKMLSMPFNSSTAVMYYNKDAFRKAGLDPEKPPVTWPEFFEVAKKLKASGM  
EGGFTTNWISWIQLENFSAWHNLPFGTRSNGFDGLDTQLVFNNPVVQRHFETIYSLSKDK  
VFIYGGRENKANPLFTSGQVGMHFESIGGYGNMKANCKFEFGVARLPYYPDVPGAPQNTI  
IGGASLWVFNGKSKAEYKATADFFSFLSLPEIQALWHQQTGYLPITQAA YELTKSQGFYT  
TNPGPEVAIKQLLNKLPQTQNSMGIRFGNFNIIEIEDQVWEDILAGKISVKDGLNKMVTD  
GNATLRKFEALNK\*

>SPSA8\_v1\_30046|ID:41144930| Glycerophosphoryl diester phosphodiesterase [Spirochaetes Bin 1 SA-8]  
MGHKNISRITIVMLVAMVLSMAFGQTEPAQPSVVPQGQSAEASKGISMNTTSNVLVIAHR  
GFRSVAPENTLLAARKAFEIGADMWELDVAATTDGELVIMHDDTLLRRTTNVKEIFPARDP  
WSVYDFSLAELKSLDAGSWYKKADPFKQVLNGNISREEAASFAGEKIPTLREALELTKAR  
AWSVNIEIKDATNRTCDAWIVEKTVDLVQELGMEAVVVISSFNHTYLERAKKAPEIKVA  
ALIDRPVKDPVTILKRLGAVALNPNLKYLDEKTVITVRAAGFGVLVWTVNESADMEKLIR  
WGVGTGIITDYPDRGLAVVNSKR\*

>SPSA8\_v1\_30047|ID:41144931| putative Peptidase C39 related protein [Spirochaetes Bin 1 SA-8]  
MAERITSMYHYLNTYDVGRSIWVFSKSTGFAEVLSYSRHESCPGKAQGLENAHEGLVLT  
GARRGTLITDEIEIPDADWLTPWWNADIAGSGGLSVYLQAEVSGQWSSWYPMGSKHNPA  
SRTFSDDETGGVLVDTLKLAKPARKFRLKLELSAGTSPALPGSVLLRRVGVITRSSAGQHS  
ASKPYLLKESALLVPRRTQMAEDESVKNRICSPCLAMALDYFGINLPTSFVAASCFTDG  
AQIFGNWSFNVAALWSLGLRARLEYFLNFEFASAELYTGKILIASIRYGGKELAGAPVQQ  
TDGHLVAVTGLKKDKTKGYMVLVNDPAAPDVQTVQRAYPLEQFEKAWTGYAYVIEGKR\*

>SPSA8\_v1\_30048|ID:41144932| exported protein of unknown function [Spirochaetes Bin 1 SA-8]  
MAIFLLSAVFLILNTAAGYPALARDIQKARNLTIGQPEQRKLALQLTETWAAAKNLGIYD  
NMLVFDA YRIRARVLEREGKTAEAQALYNTLKTWYAHTRPAESLP\*

>SPSA8\_v1\_40001|ID:41144933| protein of unknown function [Spirochaetes Bin 1 SA-8]  
LIKFADEATIIVASGKGGDGCVAFRREKYVPLGGPAGGDGX

>SPSA8\_v1\_40002|ID:41144934|rpmA| 50S ribosomal subunit protein L27 [Spirochaetes Bin 1 SA-8]  
MAHKGVNGRDSNPQHLGVKYANQAVSAGSIIVRQRGTKINPGTNVIGIGKDDTLYALVDG  
MVSYKEFRGKKYAQVEFPFAE\*

>SPSA8\_v1\_40003|ID:41144935|rpIU| 50S ribosomal protein L21 [Spirochaetes Bin 1 SA-8]  
MYAIVEINGKQYRAEQGKKTVDRIEADQGSSLSLDKVLVSRDEAVTVGTPYVAGVTVK  
AVVEEVKGDKVVVFKYKPKKDYRRTQGHRQPYTVLSVQEIAGV\*

>SPSA8\_v1\_40004|ID:41144936|argS| Arginine--tRNA ligase [Spirochaetes Bin 1 SA-8]  
MTELKAAWKQRVYAALRKFAQSGNLAIDTLSEDMIVAEFPPKPELGDIGFPMFSYAKIFR  
MSPANLASQVAAALEPAKGGDADLGAAKAVGPYLVNRYFNREALSKYIFQNGTSFARSPL  
AGRKVMIEFSCPNTNKPLHLGHLRNNVLGESLSRIIKTAGAEVRKVNLINDRGIHICKSM  
LAYQVYGGGRTPEDEGLKSDHFVGVKYYVLFNTLKSSEDPSAEKKAQELLRKWEAEDPDVMM  
LWKKMNTWAVDGIKATYARQGISFDQYYFESQTYMKGKEEILAGLERNIFYREEDGSIWA  
NLEDIGLDRKVLRLKDGTSLYITQDIGTAIYRHVDWPFQQLIYVVASEQQYHFRVLFEIL  
KRLGYAWAKDL YHLSYGLVNLPSGRMKTREGTVVDADDLIDELASLAQKEIAERERESAI  
DDAAKVAEKIALGALHYLLQTSPVKDMLYNPEQSLSFTGNTGPYIQYMGARACSILRKY  
HKGEGNAGKGTVTPAKLSSDADWMLVRRLLALQEAVELAARSKEPSVVAAYAHDLASDFS  
SWYRDNPVLASEDPDLSATRVELVKAVKSALQNVCMWMLCIPFLEEM\*

>SPSA8\_v1\_40005|ID:41144937| protein of unknown function [Spirochaetes Bin 1 SA-8]  
MNDLSYMVKQARVFFPVTAIPKASQDKVDGIRNEALLIRIQAPEDGKANTAIVNVLSKA  
LKLPKSEIRIEHGHANRHKIVSIPQNSLXSLQKLCLINLSGKEPSDSSP\*

>SPSA8\_v1\_40006|ID:41144938|ligA| DNA ligase [Spirochaetes Bin 1 SA-8]  
MEQDQTAARVRELEILIKKHQDLYYNAEPEISDEAFDALWDELARLDPNNLLKKVGEDR  
LDGWPKARHLIPMGSQSKAADPESFSSWAMKNPSNLYLVQYKLDGASIELQYKNGRLEKA

VTRGDGIIGDDITPNALRMIGVTAELPIPFVGGVVRGEVLSHEIHRTKYADKANCNRNAAN  
GLMKRKDGTGSEDLQVICYDAAGMAAEQETAAPDIRVHLDKFKTEMDKLGWXEKMGFXTVP  
SVXLKSPEEIEYRGKIMAIRKDLPDFDIDGLVIKLEIDPEDAAKPRPEKQIAFKFSLEE  
AVTTLVAIEWSESGVNYTPIGIVEPURLAGTTVQRANLCPNPMIRTMRLKIGSRVVIVKR  
GEIIPKIETLVENPPDAEEIGQPEHCSRCTALVDEGTRLYCPNPACPKRALHRIEKWIS  
TLDIRELGDVLIQKLFDAAGKLRSIADLYRLTAEDLERLERMGPVLARKIIRSIEAVREIP  
LEVFLAGLDIEGVGPLVARNLVVNGFNTLEKLLSAREEDFLTLDGIGLIMAKSIVGGLKE  
CKNEIEEILMTSKIRIQTHVADSAEAVLAGKSFCFTGELVSMKRQEAELVARFGGTTKS  
SITKDLSTYLVTNEPGSGSEKNKKARQYGIPVINETEFALIDNAKEQVAKNE\*

>SPSA8\_v1\_40007|ID:41144939| putative Xanthine dehydrogenase [Spirochaetes Bin 1 SA-8]  
MSSMKPGEQLPILTLLEVRDMLFASTIRSTVAYAKEFSVQRSQLPFGYRMILPEDMVKDG  
MSLEFSDGIPLFATDTIRYRGEPLGLIVGPDVLCNLSLVKVTYRESEPNFSWTTFPS  
SRIAARKRIRIGKIEVSTPKGISDQQWETTTHWTGSFDHEYSEPSSALAVWEYDKLVIYC  
ASQWPNHVRSSISEVLKVPQKDILIRPTDLGQSIEGRIWFPSLIACHAACARLCNKPVK  
ILYTRGEDYCFAPKQARSCISSLSDERGRLASLDIRLVINIGAYNPLAEELLDHAVLS  
LLGIYACPVVSIDAFVQSNVIPLGALGNLGSIHGFFALDAHLNHLARKYQKSPAEIKAI  
NMIAGMTVHGDVQVSSVIPFSKIQQKLEIMADFQRKHASYEVIRKRDPA SRKGIIRGIA  
GSFGYLTGDAFLNIPEKNRYSVEVQLEKDLTIVIKTEAAISSENARLMWKKTVSEILSLP  
ERSIHVIQESVHTNSRCGPMVVSARGVFAINKLIERSCRALQKKRFRETLPLTVKSQMOCN  
PSIQWTEGSLSGKAFDAASWCGTIELEVDAITGQVKPLTIWMAVDAGRIINKPVAESSL  
RAQAVNALRLCLDDVVPETIDSSSYLAKKRLPFNEIPDIVIEFMDSDRTSALGIGELPF  
ATIPSAYYGALSQALGLNLPSIPASPHDVMRIWEAT\*

>SPSA8\_v1\_40008|ID:41144940| Isoquinoline 1-oxidoreductase subunit alpha [Spirochaetes Bin 1 SA-8]  
MTITFQLNGITKNVKIRSGDRLSTILTQEHPPIKSLIPDCLSGHCGKCLVIMDKRLVYSC  
LVPAFRARDAEITIEGLSDSDDIRDIQKGFQEAHCHPCNFCKNAKTLVIWDLNRIALP  
NESQIEESLSVVCSCCTDPVSLKAVFLAADLKNRRKYHRADK\*

>SPSA8\_v1\_40009|ID:41144941| protein of unknown function [Spirochaetes Bin 1 SA-8]  
VLISEIHYPASVTDALALLDEQPETILLAGGTEITGAQVSRFLQFPQSIACIAKIPELKK  
TTRTEQFMFEGSCTSLTGLLSLPGILPHPLAQAIQSIGNPAIRNIATLGGNLASRRQFM  
DLWPFLVCMDAQVEIRNRTNSHWANLFLYADSSSKPFFPEKSILTKVRIPLVEYSNVFYR  
KIGGQGFPHHESAVFVCMAEIQNKIESFRLVFSGTKVFRLQEVLSMFAKKITNSREL  
AFARQEYIREFSRSGFLKPAIFSSLVTDAFETLFGASM\*

>SPSA8\_v1\_40010|ID:41144942| putative Uroporphyrin-III C/tetrapyrrole (Corrin/Porphyrin) methyltransferase  
[Spirochaetes Bin 1 SA-8]  
VSAK GKLLLLPAPLQPYSRDAWTLANLESSLPARALFEYRRLSTFITESSKTA YRLLSAI  
RPNE DLASLSINILDEHSKEEDIFNFIRLXENGEDAGFFSEAGLPC IADPGAAL TAAAHK  
KNITVVPISGPSS IIALIASGLDAQRF SFLGYLPQESVQRKHVIRRIGQDTAKDRITRL  
FIETPYRN RALIQLDLRFLPGDMHFCFAANLDTSEQLIISQSVDQWKTFPVTMPAKVPAV  
FVIGYPATIKPVNTV\*

>SPSA8\_v1\_40011|ID:41144943| mfd| Transcription-repair-coupling factor [Spirochaetes Bin 1 SA-8]  
MNKKEPQVLLDFLRHYEPYTALRRSLENGEKTIDIKEAELSFLAMMAAALHRFEKKRLCV  
VVPTDQDAENFIRDTGFFGAKADVLPWWKTGAYRSVSVRSRIFGERVRTLADLLHGKASL  
VIASARAYMTPVPPRDYLRKLLVFNRLSRFDPERIADRLS QYGYLRVPRVSLPGEYALR  
GEVLDIFMPGDNTAFRIQFEFDMIEKITAFDPITQTASGKLD SILLRPIKEVMWEPETLK  
SVQEKGSGYPQCRERMNILADSLQRQEDGKAEEYWFSGAFDSPHSVAEYFDS DITILFAN  
IERILAQQESARKEYAGMYRQALRYGAVPPPERCLVEFGTDFDGIHTIVRSFALKDETQM  
ERLSLGSEPGHSYFGNIAYLKEDISNFEKAGYRQYVAAGTDIQAQRLASLISNENCAFLI  
GDLSAGFTIPGLKLRVIEQEQEIFGRKKRTPKSLAASQSSAIENFVELAPGDFIVHVNYGI  
GKFLSIERMKVLGNERDYIKIAYADAETVFPVIEQANLVQR YIGNEGEAPRLDSLGSKSW  
ENRKKKVRKSVEELAERLIRIYARRKAARGYAFPRDNEWQTA FEASFPYNETIDQLRCID  
EIKKDMESPRPMDRLVCGDVGYGKTEIALRACFKAI AAGKQVAFLAPTTILAEQHYENFK  
ERIEQYPVTTAMLSRLVAPKVQKKVLKGLADGSIDMVVGTHRILQKDVVFKDLGLLVIDE  
EQRFGVKDKERLKEMKAGIDCLTLTATPIPRTLHMSLLKIRDMSILQTPPAERQPIETFV  
EYKPEVVARAIRNEIERGGQVFYLHNRIESLQEVEAFLRTIVPEVLTESA HGQMEPREL



EDIMHRFIHGAFHVLVSTTIIENGIDIPNVNTIIIDRADMYGVSQLYQLRGRVGRSDRQA  
YAYLLYPDKRALTEIAMKRLQIISDFTELGSGFKIAMKDLEVRGAGNLLGREQSGDIYSV  
GFDMYLKLLDDAVNALSGFEPEEEPYLELEYSGFIPEDYINQPMLKMEIYKCIASVSRQH  
ELDALQEEMENRFGMPPEEVQSLLSLAEIRVICRKL SVASLREKKGMVHVEFSKVSKISV  
ERLVRLIKESNGRIRLDPEKPNAILMTKAIGLREKSEFIRERLASLL\*

>SPSA8\_v1\_40012|ID:41144944| protein of unknown function [Spirochaetes Bin 1 SA-8]  
MIAVLVADDDAFSRQLSHRLRLQGYDLIRYRDPVKLSDNIAELAPDLVIVNGRDFPLHWQ  
VLSAEISMLGMTGTTVILASSSCPQNFQFKELKMSWLEYTGSIDKNMFRACLDQASQAK  
HISVSDTE\*

>SPSA8\_v1\_40013|ID:41144945| conserved protein of unknown function [Spirochaetes Bin 1 SA-8]  
MSSDLNSPCDESYLEPYASKFKAIGHVPRLKILCLIAHQDVPCVGDIVRCLNQPQPVVVSQ  
HLAILKKTGIVASEVVKTRRVYSIKDPFIKSLVESIICNIEDSATGHEDERQTPTSPV\*

>SPSA8\_v1\_40014|ID:41144946|ispG| 4-hydroxy-3-methylbut-2-en-1-yl diphosphate synthase [Spirochaetes Bin 1 SA-8]

METETVKVGSVMMGGSWPVSIQTMWKEPLPAFSGTSDPRLAETAARIKQLHEIGCDILRF  
AIPDERSVESLGLLAAMSPIPLVADIHFDWRLALKCLDFPIAKIRINPGNIGARWKVEEV  
VRKAKDKDVPIRIGVNAGSLPEDLRSNEDTAHACILAAEREIEVLEELDYHTIVVSMKLN  
EPAEVLKANREFASRFSYPLHLGVTEAGPLISGIVRNTAALVPLLQEKIGATIRVSLSDS  
MEAEILAGREILACAGARNAGARIVSCPRCGRASFDTHAFIDRWSERLYRIQKPITIAVM  
GCVVNGPGEAKNADIGITGAGDYVLIFRKDREPLKIKPAEADSAFSALEEEIINE\*

>SPSA8\_v1\_40015|ID:41144947| conserved membrane protein of unknown function [Spirochaetes Bin 1 SA-8]  
MNIAMIGAACVLGFSAVGSAIGAGLAGQAAIGSWKRSYMSNKQASFLLVAFAGAPLTQTI  
YGFILMSRMIASTKDPLL VLAAGMAGGLAIGMSAVAQGQAAAASCD AFGETKKGFSNYMI  
VIGLCETVALFVMAFTFGAI\*

>SPSA8\_v1\_40016|ID:41144948| V-type ATPase 116 kDa subunit [Spirochaetes Bin 1 SA-8]  
MIAPMKRFTIVVTSHDIDSAPHYLRKLGIAHIEPLAGAGQHFQNLQRKKDAELAKIILA  
SYRNKKQKTETVSQLSTKELISRAIEANALINSSRDTIADA EKELERIRSWGEFSPDLFQ  
RLKTDRIHIRLFEGLEKNLSELSSSVEYLRLAAPKGGVRIA VFSNEDVPASFMEFHVPEE  
NAATLQNRIAQEKEKSAKAEADLRELSKSIARVEQEIRIIDAEIKIESLRSGMPREEQLA  
YFSGYVPARESEKLLKKEAKKRK WALLVDDPSDEETPPTKIENPPAVKIIQPVDFLGTVP  
NYREYDISAYFLVFFSLFFAMIFGDGGYGMLLLGLALFMLLRTRAQKAPVGD SLKLLFVL  
SAVTIAWGFATASWFAIPYETLPSLLQKLSIPAISSNNPNAGTNVKIFCFILGTLQLSIA  
HIKNIKRD FPNPKFLAQLGSLLMVVG MFNAVLNLVIDSRRFPLQDWALVLIGGGFFLVFL  
FGNWNGSLVGSLEGLKGIPTFLGT VSVFADITSYIRLWAVGLAGLAISQTVNGMVVGM  
FGPSGRIISFIIGAVMGLVLLFVGHALNIVMTVLSVVVHGIRLNVLEFSSHLGMEWSGYK  
YEPLGEIAENINEQEKEL\*

>SPSA8\_v1\_40017|ID:41144949|atpD| V-type ATP synthase subunit D [Spirochaetes Bin 1 SA-8]  
MAKIKLTKNELKKKKDALKMYRRYLPTLQ LKKQQLQMEIRGVEARLEQLLAQKAAFEKAF  
EAWIAVFSEPYTHDQNGMPLLNIKKTIVSEGNIAGVTIPVFESVEFDLSEYDLFLTPLW  
VDKALELMKNVLSVDVEYSVVEKQKDLLMSELRTTTQRVNLFEKVKIPETLADIKRISYI  
LGDQQTAAQVVRGKIAKNKVGGRE\*

>SPSA8\_v1\_40018|ID:41144950|atpB| V-type ATP synthase beta chain [Spirochaetes Bin 1 SA-8]  
MNKIYSRIESITGNVISVRAENIAYGELAEVSTRYGTSLAETIRLDKDLVFLQVFAGGRG  
VSTGDEV RFLGHPMQVSFSDNLLGRIFDGAGEPRDSGPAL KDHLIT IAGPSVNPYKRIIP  
REMIRTGIPMIDLFNTLVKSQKLPIFSVSGEPYNQLLARIAMQAEVDL IILGGMGLKFDD  
YLFFRD TLEEGGALSKTIMFVHTAADPTVECLMVPDISLAVAERFALKGKNVLVLLTDMT  
NFADSMKEIAITQEQVPSNRGYPGDLYSQLASRYEKAVDFSDAGSITILAVTTMPGDDVT  
HIPDNTGYITEGQFYLRGGHIEPFGSL SRLKQMVNGKTREDHRAIMDGMIKLFASYRDT  
LEKSMGFQMTSWDKLLKYGELFESRMMDLSVNVPLEKALDEGWEILAACFEPRETGLR  
SELIQKFWPAREGALKSQAQ\*

>SPSA8\_v1\_40019|ID:41144951|atpA| V-type ATP synthase alpha chain [Spirochaetes Bin 1 SA-8]  
MIQTNGHVIAVNGNMVSVHVEGVVSMNEVAYILSGGRQLKSEVIRIRGSEVQVQVFEITK  
GIRIGDPVSFSGEMLSVELGPGLLGQIYDGLQNPLPEIAEKTGYFLEPGIY LKALNRSIK  
WRFTPAAKPGDVVRRGYTLGTVPERNFIHSIMVPFNMFGDYTVASIAPEGDYTIDE EIAI

VEDSRGNRKSMTFFWPVKRAVDCYAERLKTQPMVTKTRIIDTFFPVAKGGTYCIPGP  
FGAGKTVLQQVTSRNADVIVIAACGERAGEVETLQEFPEIIDPRTGRSLMERTIIC  
NTSSMPVAAREASVYTAVTLAEYRQMGLDVLLLADSTSRWAQAMREMSGRLEEIPGEEA  
FPAYLESVIAAFYERAGIVKLYNGKKGSVTIGGTVSPAGGNFEEPVTQATLKVVGAHFGL  
SRERSDARKYPAIHPLDSWSKYPGILPEKAVSYAHHYLERSSEVGAMMKVVGEEGTSLLD  
YVIYLKGEFLDAVYLQQNSFDPVDAAVSPERQKTMFTLIIRILGSRLEFSNKEEARSWFY  
ELRQLFIDLNGTAQDSDLYQQFLDKIEKALESKKPVLQHGAKAVLSLLE\*

>SPSA8\_v1\_40020|ID:41144952| conserved protein of unknown function [Spirochaetes Bin 1 SA-8]  
VSRYWYFPATLPGLLFGSASPMTDEQFMEMARQALSPSDFAELETCLDISGMGAKEKTYN  
SRLADYRAWERAFRNELARLSRKAGIDEEQYLRQGPKDEAAAAAQSCFTCQDPLEAE  
LAAEHERWLAVERYALSSFDLDSIIAYRIKLGIVNRLKNLEKERGILEYSRLYKEIMEK  
AASRDAYS PGDEE\*

>SPSA8\_v1\_40021|ID:41144953| putative V-type ATP synthase subunit E [Spirochaetes Bin 1 SA-8]  
MELQVQELLERIKSEGIDSAKAEAGRIIAEAEAKAAALLED A EKAASGSEEAARLRIQNM  
ENASRVALAQASRD TLLALKESVQTFDFNLIVASIGEAFDANFVQKILPEILKEMAKNLN  
GDIIVSVPEKVQASLDQALSVRMSKELSRGVEFKVFPIDAGFRVSGK D STIQYDFSAEA  
VAIIISARLNARLSEIVNESVKGSRNL\*

>SPSA8\_v1\_40022|ID:41144954| Oxidoreductase domain protein [Spirochaetes Bin 1 SA-8]  
MKETTIGIIMNGVTGRMGTNQHLERSIMAIRKQGGIRLADGNLYLPEPILCGRDEGKLLK  
LADTYGISKYSTQLD TALS DPYYKVYFDAQVTNLRPEALQKAMKAGKAVYCEKPTAGSTR  
EALQLASMAEKLGLKNGVVQDKLWLPGLRKLKYLADTGFFGRILSVRGEFGYWVDFGFSQ  
PAQRPSWNYRKEDGGGIIMDMFCHWQYVIENLFGKIDALSAIGAIHIDKRVDENGRQYAA  
TAEDAAYGTFMLDNGIVCQFNSSWDVRRRDDLLVIQVDGTRGSAVAGLRECFIQDEAMT  
PKPVWNPDISSIDYFENWARMPDRQHYNDAFKVQWEKFLHVAQDEPPFWTLREGAKGV  
QLAELGMQSWKEKRWLSVPPLASEE\*

>SPSA8\_v1\_40023|ID:41144955| Xylose isomerase domain protein TIM barrel [Spirochaetes Bin 1 SA-8]  
MRDLADMAIHTITTKPWKLD TALEKYAQAGITGVS VWKESLEGFTLPEARS LLET SGLKV  
VSLVRGGFFPASSLAQRMKKVEENKQLIDTATAIGAPLIVLVC GADPGIPLQEARKQIEE  
GIAQILPYAEDKHIKLAIEPLHPMYADARSAIVTIRQAHELCKIFDXKSLGIAVDVYHVW  
WDPDLEYQIEKAGXSN SIFAFHVCDWKTPTLDMLNDRGLMGEGCIPIRTIRQWVQKAGFS  
GFNEVEIFSNRYWSMDQDQYLSMIVKAYEEHV\*

>SPSA8\_v1\_40024|ID:41144956| Glycosyl hydrolase, family 88 [Spirochaetes Bin 1 SA-8]  
MISISSNHDFLHLKEKIRRFEMAGVKTLNLAGRWEGIQGAPVYTVNGIYTQRGWTDWTE  
GFQYGNAILVYESTHDPRLMYARRKTREKMAIHVSHTGVHDHGFNIMSTYGNLLRLSRT  
GLIDADAWEKEYYLLAIKLSGAVQASRWTSLHEKLGYYISFN GPHSLFADTIRSLRVLGA  
SHLAGHYLKAEQDETINLLERLLAHAETTARYIVFEGKGRDRWDVRGRVAHEAIFNPVNG  
SYRCSSQQGYSAFTTWTRALAWIILGFAEELEFVSMLHEDAIQSLEL PFVKT KTEIQR  
FTEVTRACADYFIENTAPNGIPYWD TGAPNLHKLGDYLIKNPDPYNPWEPVDSSAAAIAA  
QGLLRLGLFLKERQLADA EKYLGC AITISQTLFSDEYLSLDEQHEGLLLHAVYHVPNNWD  
NPSSKSSLPAGESCMWGDYHILELARCIIQQMNSGINPSRFFD GILEAD\*

>SPSA8\_v1\_40025|ID:41144957| Short-chain dehydrogenase/reductase SDR [Spirochaetes Bin 1 SA-8]  
MLDVMDGMNTMTISPRIALVTGSSRGLGRGIALELSRNGYSVAIH YSENKDAAFETLRLC  
GISKINSLQKFEIFKADISSKKDRHRLIDAVLEAMGSIDVLVNNAGRAPDKRADILIASE  
ESFEKLLSVNLEGPYFLTQYLAQRWMEKASDFEATQSEKNCKIIIFVTSISAETASTGRG  
EYCISKAGLAMA AKLWAARLAESGVQVFEIRPGIMDTDMTRAVHD TYELRISQGLVPQKR  
WGIPEDVGKAVAALASGNFGFSTG SVIHVDGGFHISRL\*

>SPSA8\_v1\_40026|ID:41144958| conserved exported protein of unknown function [Spirochaetes Bin 1 SA-8]  
MRRTAGSLLIAILALCIITVGVSAQATWKP NK PITIIVPWGAGGSTDQITRITAAELETA  
LGQKIVIVNQPGASGSVGTKNTLDAKKDGYTWTAGAAADLATYKVQGMLD TDIRTDWHIF  
LSVANVSIVGNANTPYKTIDELLA AFKAKPGQIAVATAGQSSAGHIGIEMIRKFTGIEY  
KHVTYDGGNPAVIATVSGEAQVTTQLAVEQADMIRGKKIRPLAVLSDKPLYLEGYGEIAP  
ITNWIKDFKSGPNYFGIFIPKGV PQEVIDTVSALWEKIIFNSQKIKEYARSRGALFAPSY  
GQTAQDRAFSYYQPVAWLYYEAGKAKVSPDTVGIKPK\*

>SPSA8\_v1\_40027|ID:41144959| conserved membrane protein of unknown function [Spirochaetes Bin 1 SA-8]

MQEKT MVKSDFFASIIIVFGILIV AISLSMPTMAEKEATIYSAPGLVPAFIGAVLAVLS  
FFMLIRSVARIKKTGLPLLPTKSSFSNFFRDVATRRIITLALCLGYALLLGKIWFPA  
LTYIYIFLIVAFEFDWQKSFQSQLKKIFIAFIIA VVATAVIAGTFRYVFLVNLP\*

>SPSA8\_v1\_40028|ID:41144960| conserved membrane protein of unknown function [Spirochaetes Bin 1 SA-8]  
MLQGLQMFSNALLGFLNPRSLFDALWATQLGIIIIGMLPGLTATMGVALLTTLTFSMAPNN  
AILILICMYIGAIYGGRSRAILLNIPGTPANAATTVDGYPLAKQGRAGEAIGIATTGSFL  
GSVIGMLALAIFTPLIGSVALSFSQSFVWFSIFGIIICGNLTAPKDPLKGWISGFLGLF  
IAMIGMEGIHAYVRFSGNTDLSGGISLIPAMVGAFGFAEII SVMRVEHYEVVKT KISR  
V LPRPRDVLKYWK TILRSIIGTFIGAIPGVGEDIAAWVSYDIAKRS AKKEDQE QFGK  
GSI EGLLAAETGNNACVPGAIPVLT LAIPGSAPAAVLLGAMLIHGVRPGPLIMIEFPTFIYE  
VIAMVLLATIAMFVLGSLVRPLVKVLMVPRQKLMPIVIFLLCVIGSFALQARLFDVLM  
VFGILGFILREMDYPMAPLVLG IILGDILDKNLRRALILSNGSIAPFFTRPICLILFVLT  
LLIVVTRAKWYKTALAKLKNLKRAA\*

>SPSA8\_v1\_40029|ID:41144961| Dihydrodipicolinate synthetase [Spirochaetes Bin 1 SA-8]  
MDTAAQAKIAYDRFAAGTVIPAIPALDEHRHFDERRQRTLIRYYLDSGAGGIAAGVHTT  
QFQIRDPEYNLFEPVLRISGFIDDHVKKTGKAVIKIGGICGKTDQAVREAKFLSAAGYH  
AGLVSLAAMKHETISSMLEHCESIAQEIPVIGFYLQPLAGGVVLPYEFWKKFCCIENVIG  
IKIAPFNRYKTL DVVRAAAESGRQGEIALYTGNDDAIVYDLVSTFRIPVAGVEHVLEIKG  
GLLGQWSVWTSKAVEIFETIRTIKKNNESIPNWL FQYAQGLTDANSAIFDAAHDFAGCIP  
GIHEILRRQGLLEGTWCLRKEEILSPGQKENIDRICAAYPELQDNTFIQEHLSSWLA\*

>SPSA8\_v1\_40030|ID:41144962| conserved protein of unknown function [Spirochaetes Bin 1 SA-8]  
MAVYPLHFDSEDQLEDFMATPSQEALETLSQLTGDIAILGIAGKIGVTLGMMIQKSLVAL  
GSARKIYGVSRFSDSEARKKLDVAGIITIPCDLLNAKDVANLPDAEHVVMAGRKFGTAG  
NEELTWA VNTIAPRNAAERYKTSNMVVYSTGCVYRLLSPETGGATEDSLPDPIDYQAQSA  
LGRERIFQYFSKIYGTRAILRLNYAIDLRYGVLRDLADKIMSETIIDNPDGAFNCIWQG  
DVLNQTICSLGQTSSPAIINITGPETVSIRWAAEELGKRLGKRPIFRIDSAMPDRTYLS  
NAAKAAQLFGYPEIPLLAMIDMTADWVLHGGRSLRKPTHFETTDGRF\*

>SPSA8\_v1\_40031|ID:41144963| N-acetylglucosamine-6-phosphate deacetylase [Spirochaetes Bin 1 SA-8]  
MEACKDLRLTNCKILTPFEMLEEGSITITEGKIAEVNRGISEESGSLKTLDMRGALVIPG  
FVDLHCHGALGEDFMSASEEAVQKAAWFHLQHGTTSLLPTSLSAPLPAILSMKTMQSAM  
QNGTVPNLAGVHIEGPYLSELQCGAQDTRYLKNPDPEEYKILEFSSIIRRWTIACELPG  
ALELGRILARLGILPSIGHSNAQYSEVVEAVSSGFRLVTHLYSGTSLVTRKRGIRYPGVV  
ESTLLLDTLAAEIIVDGMHLPEALVQLVFKIKXADNVIMVTDAMAXAGMGDGIYRLGDAE  
SGQDVSVDHGVAVWTSSGEAFAGSIATADHLLRKAVLWAGISLKDAVTSLSATPAKLAGIY  
KRTGSIIEPGKNADILIDDNLEILMVIKGRIVGSGGSYGSISSE\*

>SPSA8\_v1\_40032|ID:41144964| Xylose isomerase domain protein TIM barrel [Spirochaetes Bin 1 SA-8]  
MILSGFADEAGDSLDEQIAVTRELGWRYVELRSIDRKNVLDLDDRAFEQCADKLT KAGIK  
VNCLGSNIANWGTSINDDFAATEKTVDRAIKRMKLLGTEMIRIMSYAILFGSNGKPLADQ  
RAERIRRLKIICSKFADAGITCVHENCLNYGGMSFSATQKLLDEIPQLMLLFD TGNPCL  
TPDFSKPEPWPQNPF EFWKLFSPRIRHVHIKDGWRNPTTGKEEYFMPGEGPCKLEQIIE  
TILKAGYQGAFTIEPHIAVVYHNPSVQSSSKQRKTM YIEFARKFETMMSKLEYREEHGSL  
\*

>SPSA8\_v1\_40033|ID:41144965| Dehydrogenase-like protein [Spirochaetes Bin 1 SA-8]  
VKFGIIGTGLIAEFHARALSEIKGAELEACMDVNSERAAGFGAKYHCTS YNSIEHFLKHP  
GLEIVTVCTPSGLHRDMAVA AHAHAGKHVIVEKPLEISTERCQQIIDACQKNNVLSGIFP  
SRFFSAASTVKKAVDAGRFGKLTMG TASVKWWREQSYYSTGGWKGTRSLDGGGALINQSI  
HAIDLLLWYMGDAEEVYACMDTRAHSGIEVEDNAVVA VRFKNGAIGTIHGSTS VWPGFLK  
RLEISGTAGSAIL EENLTFWK FKEENPDDEHMRKQFAGATH TGGGASDPAAISHHGHKL  
QFLDIIDAIQNNREPLIDGEEAMKAVRLIEAA YRSAELDKPVS LGEM\*

>SPSA8\_v1\_40034|ID:41144966| putative Xylose isomerase domain protein TIM barrel [Spirochaetes Bin 1 SA-8]  
MDRFKLA VCNELFGSMDARTYIPVVKRSGYEGIEFAPYTIFPDFNVHQARKRAVEIHELL  
KGEGLAFSGFHWLLAYPDGMHLLSDNSDARRKAWDHLKLLFELSF EFGGGTLLVLSRQR  
TIPDNTERNSAIRRFIDEMVFFIESIEGSKSMLLIEALSPDQTNFIN TLQEAAELVQQID  
STYFQTMFDFHNARDEKQPWDK LIEEHFKCIKHIHINEIDGGAPGTGKSEYRNAFSAIKK

LRYEGWISMEVFTTPADPERYISAALQFQKKIFHLVEE\*

>SPSA8\_v1\_40035|ID:41144967| Malate dehydrogenase [Spirochaetes Bin 1 SA-8]  
MKAIERNKLIRFSARIFMACGVPEQQAFEQSMVLVAADARGIPSHGIARLPRYVAGLQQG  
SMIPNIQPEAIKETLVSLLDARGGLGAPVSIATMKKVIEKAELAGMSFAAVRNSNHFGI  
TGYYAMMALPHDMIGMAMTNTAALGVPTTHARQVMFGTNPIAFAAPAFEEKAFVLDMSTTA  
VTRGKIEVFARLGKPLPRGWA VDRDGAPAGNANALLDDMLHRSGGGLVPLGGDDEIHAGY  
KGYGLGVMVDILTGVLSGGLFGQQVADTETTSARVSHCFAAMKIDMFQKPEEFKKSMDSM  
LKALRTAEPARGKARVYYAGQKEYEAEEEASKFGIKIDDTFRILTDLGKKFDINPEDLL  
FH\*

>SPSA8\_v1\_40036|ID:41144968| conserved protein of unknown function [Spirochaetes Bin 1 SA-8]  
MQIKADGQTYAPRGMVSPVCEPGTFKIGVIGLDHGHYIGMCNGLVEAGAEIACVYDNERM  
KMDAFCKVFPDAKKAESEHEILENPDIALVASAIIPDRRTELGIRVMKAGKDYFCDKPPC  
ITKQDVSQARRAVEETQKKFAVYYSERLHVEASVCAEKLIKDGAIGRVIHVAGWPHRIS  
IPQRPSWFFDKARYGGILVDIGCHQIEQLLFFCGASDAVISSSRAGNYKYKQYPRFEDFG  
DAALLMNNGTTGYFSVNWFTPDGLGAWGDGRTFIQGTGYIELRKYIDVAADPEGDHVIL  
VNNKGEQHIHAAGTCGFPPFGRLIKDCLERTSTAYDQELTFRAIELAIEAETQATAVQ\*

>SPSA8\_v1\_40037|ID:41144969| putative signal transduction protein with CBS domains [Spirochaetes Bin 1 SA-8]  
MNKVKDILAKKPKAVFTVQSDATLYQALEIMADKNIGAILVTDKNGKLAGIFSERDFARK  
IIKGRDGEKTTVGEIMTTQVLYVDPETTINDCMTLMTEKKIRHLPVMDKLGELVGIISIG  
DVVKAYCANQDSIIAEQEFQLGQLERYINQSP\*

>SPSA8\_v1\_40038|ID:41144970|fbpC| ferric transporter subunit ; ATP-binding component of ABC transporter; CP4-6  
prophage [Spirochaetes Bin 1 SA-8]  
MSVKLIHISKEFPDLEREDRKMLAVRDMNLEINEGEFVTLGSPGCGKTTTLRMVAGFET  
PTTGEIWIWGGRCVNDDPPKXXXTTMVFQSYAIFPHLSVEQNVGFGLELKGPKNEIKDEV  
RKVMEVMGISDYAKRRPDQLSGGQQQRVALARAIVNKPGVLLFDEPLSNLDAKLRETRV  
EIRRIQOTFGITSIYVTHDQAEAMTVSDRIVVMEKKGKVMQVGTPEIYSRPNRNFVADFI  
GRVNLFPVTIKKLGKEDSGGTVLNNKGKEIRAASIASGLCEGDAAFMMVRPESFVLASKE  
SETSGSGVVTKAVYLGSVVEYELDIGEDKPILAVTHDPINNGFYSNNERVWFSFTEQAC  
HVLPQ\*

>SPSA8\_v1\_40039|ID:41144971| conserved membrane protein of unknown function [Spirochaetes Bin 1 SA-8]  
VKTSSLTRASAEIRRIARDPLLFAIIVITMLSLLVFVIYPLVSVGLQSLKTDKGLGFSIY  
GDVLKSAYLRKAFFNSLYMSVLTAAGTLIGFLFAFAVTRADVVPWKKLFNAIAIPIVSP  
PFIGALAIIMLFGNGLITWNLLKINNFPYGFNGLFLAQVVTFFPVAFVTLKGVLESMN  
PVLEDAALDLGSRFKVFTKVTPLAIPGIAGAILILFVETLADFGNPLILAGSKFPILS  
VQAYLQIVGMYDLPKGAAISMLLLIPSVTAFFVQRKIVGRRKYTTVTGKQPSSSGKIVSP  
GARIFLFIFFITIVGLIYFSILIGAFKVVWGFHDRLTLDHFKFVFGVGFKA VRDTLM  
IAGISTPIAGLFGMLIAFLVVRVKFPGKLIETTSILSFAVPGTVIGIGYILAFNHKPLA  
LTGTLAILLLNFVFRYIPVIGESGTAILAQIDPSIEEAIDLGADARKTFSRITLPMIVP  
AFFSGLVFAFVRAMTAVSAAIFLVSSRWNLMTVHIMSQVESGNLGAAAAYSVLLVGIVGL  
AIVFIRMVLAQYQKLGGTMLHF\*

>SPSA8\_v1\_40040|ID:41144972| conserved exported protein of unknown function [Spirochaetes Bin 1 SA-8]  
MKASRGFLIICMALCLIVPVFAKPGATLVVYSSVDEQNAKKIFDAFTADTGIVQVQVQLS  
SGPAYARIKAEASNQADVWFGAPSENHIVAKQEKLTIPTKYGPGFDKLGKEFKDPDGYWR  
SFYMNPMFAFVNKEVLARINAPKPTSWADLLNPIYKGIQMPSPQSSGTAYNVVASLVVM  
MGEDKAFDYLKKLAPNVQTYTSSGTAPSKAVQVGQCAIGIQFTPAFFEAIAKGFPIEVV  
PKEGVWFEAPASILKGTKNLEGAQLLVDWLSSTKGQNVFTEKETYFYPVISGAKLGKGM  
PEFDSLKTIDVDPIWAGENKKRLVERWVQEVLTAK\*

>SPSA8\_v1\_40041|ID:41144973|atoC| Acetoacetate metabolism regulatory protein AtoC [Spirochaetes Bin 1 SA-8]  
MKILLIDDEKQLGLSLKSYMLDDGIELDVAFNGKSGIQKLEDES YEAVVTDLRMPGLDGM  
QVLSWIRDERPGMPVIMISAHGEIQDAVTAMKLG AQDYLVKPFDPDELVLRLKKA VESRR  
VMQKLQAGMAAGHEEAGMIGESPKMKEIVKLEKASPSAATILITGESGTGKEVAARFIH  
ARSGRTGPFLPVNMGAFPENLLESELFGFEKGAFTGADTRKQGLFESAQGGTFLFLDEIAE  
LPLHLQVKLLRAIQERKIQRGSLVKSIPIDVRILAATNRDLEKDVKEGKFREDLYRIN  
IRVRLPPLRERKEDIPLLVGRFIRRFSSQASARKISSISKESLDLLLQYDFPGNIRELENA

IERACILAESDVLGAEDFDLFRPARSILGEENIETLDVHSGNRAGEAESRNGPKTIEEME  
KQLIEAALKRNAFHREKTAMELGITRRTLLNKMKEYGLEP\*

>SPSA8\_v1\_40042|ID:41144974| protein of unknown function [Spirochaetes Bin 1 SA-8]  
MDNANLFSNLQRKKIRAPT VSGIFYPQSPEALTEQIRILLESAAIELSERFSAIICPHG  
SLEYSGDIAALAWKSVSRMNIETIVIITPSHHCFENGIFLPESEYFTIPGCELRVDDKSI  
KALLHCNSAYVKDDLPHLEEHGIEAILPFATHLFPDSSLIPIAACSDVPSLITLNFCLS  
DILEDRLSRTLFLVSSNMAVSETDEQTVQLTEKFRSALLSRDITTEAFSHGEPSCGAR  
IIQAYLQSSCSTGKAPVFLGSRTSKLMTEADEPVGYSFGFPA\*

>SPSA8\_v1\_40043|ID:41144975| conserved protein of unknown function [Spirochaetes Bin 1 SA-8]  
MDIELSKQDRDILKTIARETLAARLEHRSPLYPEHSRALEKRYGIFVTIKVHGQLRGCIG  
RMSSNQPLIETVKDMALAAGFEDPRFPPLSHNELSLEIEITILGPLEPLSPPDNFTLGI  
HGLFIASHGRSGVLLPQVAVEYGWNKTEFLQHVCLKAGLPPETWKSPDVVLYRFEGTVF\*

>SPSA8\_v1\_40044|ID:41144976|ppdK| Pyruvate, phosphate dikinase [Spirochaetes Bin 1 SA-8]  
MAKKKYVYFFGNGVAEGDSSMKELGGKAGLAEMTKIGLPVPAGFTITTEVCDLYYKNG  
KQWPEGLDKEVDKHLKLEKTVGKKGDPKDLLVSVRSGAAISMPGMMETILNLGLTDA  
SVEGLAAKTGNRRFALDAYRRFIMMYGSTAMGIDREEFDHAFNEVKEKFTRPRLKIAAGK  
KVLDTDVNAEELEKLVAEFKAIYRKYIKAEFQDPREQLGAIDAVFNSWMADKAVTYRK  
VEKIQGVKGTAVNIVQMVFGNMGDTSGTGVCFTRDPNTGENTFYGDYLVNAQGEDVVAGI  
RTPIKLELEKRDPAKAYKQLLDVRKKLEANYKDMQDLEFTVEEGKLYMLQCRTGKRSPIA  
AFKIAVDMVKEKLITKEQAIMRIKTSIEGIFYP MIDKTQAAALKDAFLVQGIDAVPGAA  
AGKVVFNAKDAEAWAEKGEKVILVRKETSPEDVGGMHAAQGILTATGGKTSHAAVARGW  
GKCCIVGCEKLNIDYTKGTFVGEKTVKQGFITLDGSSGNVYVGLKLVKPEPEAYTT  
LMGWVDKIRTLKVRTNADTPYDAENARRLGAEGIGLCRTEHMFDFSEERILAIREMIIAD  
DEDTRKKALAKLLPFQTKDFEGIFKAMDGYPTIRLIDPPLHEFVPHDEAGQRALAEAAK  
VSFEKVVQRVNQLHEANPMLGHRGCRLTITYPEILDMQVTAIITAACNMTKKGISVLPEI  
MIPLVIDAKELKILETRARQVADAIKSGVKLSYMGVTMIEVPRAALLADQIAEVAEFF  
SFGTNDLTQMTLGMSRDDAGKFLPDYVDEKKAGIFKADPFQSLDQVGVGLLVKMGIEKGR  
STRAKLVGICGEHGGDLTSVKFCHRVMNYVSSSPFRVPVSR LAAAQAVVEEQAAMATA  
APAKKTA AKKAPAKAAASKGTASKGTASRGTA SRGSAVRGRKAAA EKVA AKKPAATK  
KAAA AKKTSVKSAAKT VTKKAPAKTSAKTI AKKAASKTAAA AKRPVGRPKGTSKKAK\*

>SPSA8\_v1\_40045|ID:41144977|dinB| DNA polymerase IV [Spirochaetes Bin 1 SA-8]  
MERIFFHVDMDAFFASVEQADNPALAGRPVIVGAAPGRRGVVSTCSYEARAFGVHSAMPI  
AEAARLCPHG VFLPVRMKRYSEVSAIIMSILFTYTPDVLQLSIDEAMLDMTGTGKLWGTP  
EECAFMMKKTIRDRTGLTISIGASANRYVAKIASGMSKPDGFLLIKPGDERAFMRSLPLE  
KLWGAGEKTRERL KARGLT TMAAIQDAPV SLLMSIFGNAGGRFLAMACQGQDPGVFTRDD  
ENKSVSTERTFEADISDRILIDELRMLADELSFRLWDNKMHTGCVGIKLR FADFTSITR  
QRSLAVPTASADCIFQEAMQLFDANWTCGKALRLIGIFLSSLVPESHIENSLFQEEPPKS  
ALAEQVVHELQKSGKGNLIRGTRLNRRG\*

>SPSA8\_v1\_40046|ID:41144978| exported protein of unknown function [Spirochaetes Bin 1 SA-8]  
MKKIFTAILLTTLGAILFSSCMGMETAITNSGNSGTVTAEYRLSEELVNFGAIEANKAL  
LPIPIKADIENSLASAKGLKLVSWSKSGTDTVIKTVISFDSLEALVFYLDPQGQMAR  
YSVSDAEKKIIFSLGDTMPPMDEQMKSLAKEAFAPYAFKFTVTPSKIIRAGSSLSIISA  
ATDGKKA VFEKMQDIVTSGEAPVIEFTW\*

>SPSA8\_v1\_40047|ID:41144979| conserved protein of unknown function [Spirochaetes Bin 1 SA-8]  
MSLLFMRDTIIPQGRGCQESPSVIVLKQMVVSM LLLVLELPETTSLKDKRKKVVSIGIKHRL  
HNKFRLSCSEVDLQDSLGF AEIGAALVSNSPVFGKVLNEAVRFVEENFPVNIYESQIHS  
EYVG\*

>SPSA8\_v1\_40048|ID:41144980| Methionine--tRNA ligase (fragment) [Spirochaetes Bin 1 SA-8]  
VSRMKRRLITSALPYVNNVPHLGNLIQVLSADVFARFCRSRGYETLYICGTDEYGTATET  
KALEERISPKELCDWFHAIHRDIYSWFGISFDKFGRTSTPEHTEITQSIFLDLEKNGYIV  
SQTVEQLFCDHCGRFLADRYVRGTCPVCGYENARGDQCENCGKLLDPTTELKNPKCSSCGA  
TPHPKATTHL YIDLPKIKEKLEPWIQSASEKGFWANNAIQMTQAWLRDGLKPRAITRDLK  
WGIPVPM SFGFEDKV FYVWFDAPIGYISMTASLAREKGF DWKSWWQNPEEVDL FQFIGKDN  
IPFHTVIFPSSLLGSGKNWTLHMHXX

>SPSA8\_v1\_50001|ID:41144981| ATP phosphoribosyltransferase (fragment) [Spirochaetes Bin 1 SA-8]  
MTSSTRLYASVSAWRNPGKRSAAESLVLILRSVLEARKRVMLEVNVSANLEELVKILPC  
LRSPTLSPLEGGKDFAVRVAAPRSILADLIPEIKRRGGTDIVVTELCQLVP\*

>SPSA8\_v1\_50002|ID:41144982| putative Histidinol-phosphate aminotransferase [Spirochaetes Bin 1 SA-8]  
MEKKPGRLLKLDANEGRCVLTQTELASLLQPEVAQRYPDARPLENRLASWLGLRAGQVIA  
TAGADDAIDRIFRAYGGPGKTIITTTTPGFVEFLDTCLRTKSTFKSIYREPGEAFPLEAFL  
AALNREKPAIAILASPDNPAGTLIDEQAVFAIAETCKKTGTLFVFDITYIDFAEDYPLLE  
KSLAVLPWIVLTGSFSKSRGLAGFRAGWAACSENTTIIDTLRDFGPPYSLSSPAIQAAL  
MAIEAGDRFQAFVERVQTERRLTAAMARLGAKTWQSQANFVTVAIENSKEFAECLLQEG  
IRVRTWPESPESRKLVRITCPGNADEFEYLLSALEAVQAGGKS\*

>SPSA8\_v1\_50003|ID:41144983| putative Imidazoleglycerol-phosphate dehydratase [Spirochaetes Bin 1 SA-8]  
MSEVEKSAESPVWVRARRESKETNIEIELALEPGTIEIDSGIGFFDHMLKALAYHAGWAL  
KLRCRGDLEVDHHSIEDCGIVLGSAFGQALQLMPAIQRFGSAFAPLDEALARAVVDISD  
RPWASVDLGLVREKIGEAASENLRHFLETFAGNARITLHVVDVLKGSNDHHRAEAAFKALA  
LALKMALQPRRQPRQEEGLQTAQTGAADNPPSTKGSPLVIETAGGPTVPGKI\*

>SPSA8\_v1\_50004|ID:41144984| putative Imidazole glycerol phosphate synthase subunit HisH [Spirochaetes Bin 1 SA-8]  
MEERRKTLAIAATGTANLASVLALCARTGVKALITDPAIVADA EYALLPGVGFAGFPAMA  
NLRACGMGMALRERWLKKGKPLMGICLGMQMMCRESEEAPGVPGLGFIPAAVQKFRGSLPL  
PQLGWNIVPGNGSILESGWAYFANSFRVAAMPATAPAEFSAAKPGRFVGSQAQYGETFA  
ASIEFFPEGSALPTLLCQFHPELSGSWGEALFKRWMGLDYSPAQQRQEAAAR\*

>SPSA8\_v1\_50005|ID:41144985|hisF| imidazole glycerol phosphate synthase, catalytic subunit with HisH [Spirochaetes Bin 1 SA-8]  
MSG LAKRIIPCLDILGCRVVKGVNFKNLADAGDPAELARRYEAEGADEIALLDISATLED  
RKTALETVRRVRLAVSIPLSVGGGIRTVDGERLLNAGADRVSVNSAAVRNPEILSLLAE  
RFGVQCVIAAIDAKSVTAPQLTGGKGGRAWVEMIDAGKTATGLDAVAWATACANRGAGEI  
LLTSIDRDGTGTGYDYALLEAVAVAAGIPVIASGGASRPEHFLEGLTAGAQAVLAAGVFH  
RHERTIEEIKEYLKKNMGMEVRL\*

>SPSA8\_v1\_50006|ID:41144986| conserved protein of unknown function [Spirochaetes Bin 1 SA-8]  
MIIPSIDIQNGQAVQLRGGHPVLVVG DPEKLAEKLSRLGEIAIVDLDAALGKGSNKDLI  
LKL VSKYPCR VGGGIRSRELALEYLDAGARQIVIGTRAARDFLEALPRERLIAALDMDKG  
TIMVEGWTKATSQSIKERITELAPLVGGFLITTIEREGELAGLDMDLARDLIAVSKGTRI  
TFAGGAMGGEKGVQQIAELDRLGADVQVGTALATGALKLSEAFQAQLVSDRSGLWPTAV  
CDEGGRFLGLVYSDLESLEMALNTGKGIYKSRSRGLWIKGETSGNTQRLIRADLNCERDS  
IRFTVAQEGQGFCHLQRRNCFDDGFGIEKLSRTIADRFKQAPEGSYTRRLFSDRGLLAAK  
LREEADELAKADGARDTAFEAADVIYFALVKATREGASLYDIEQELERRSFKVQRRPGNS  
KPGYDSSDGGASWTSIH\*

>SPSA8\_v1\_50007|ID:41144987|hisD| Histidinol dehydrogenase [Spirochaetes Bin 1 SA-8]  
MDQYPLRRISLNQIPEPQARLFDLEVDVA AAKAIEAVRLGGEPALRMWAEKLGEIAEGDT  
IFYNRGDLEAAAFQAISEAEQRLLRVQGRVA AFQAEQALGDVDIAVPGGRAGHRFIPV  
ARAGCYVPGGRYPLSSAIMTVPKAVAGVREVVCAGPKPQTITLAAAFVAGADCFLACG  
GAHAIAALAFGVVSPRCDVIVGPGGRYVASAKRQLFGSVGTEAPAGPSELLVIADDSADA  
EIAAADLLAQAEHDPSSVPMLACRSEAFAAA VETALARQLAALPEENRNTAMQSLKNGWA  
FVSPRMEELCKAAETCAPEHELMVAQTDA YAQRIQSAGAVFVGNNSAEVFGDYGAGPNH  
TLPTGGAARFAGGLSVLNFLKARTWLALSEAEPLIADTAQLAKLERLEAHARAALKRASR  
\*

>SPSA8\_v1\_50008|ID:41144988|ypwA| putative metalloprotease YpwA [Spirochaetes Bin 1 SA-8]  
MRQEIAKLVELDRQRTLLTHIGAVLGWDQETYLPEKGEERSEQLSLIEGLAHEKA VDPQ  
IGELLAATEAAKDLSP EEAAYVKLTRREYDKETKLPSEFVMEYAKQASLSQAAWSQAKSA  
NDFSLFAPHLETMIRMNKERAA YLDSGRKPYDVLLDLFEYGST EASVA AVFSVMKKDLVA  
LLDKIAAQPPVDD SFLHAPVSAEIQA KMSRYLMDAVGYDQKRGRLDTTAHPFTTTLGRDD  
VRITTRYVENYFPSSIFSTIHESGHAL YEMNIDPHPDFRGT RLAEAVSMAVHESQSRMLE  
NFVGRSRAFWEKHYP AIQAMAGEPLANVDVDRFVKAINKVERS LIRTEADEVTYGLHVIV  
RFELES AISGNLAVKDIPQAWNAKIKELLGLDVPNDRLGCLQDVHWSMGAFGYFPSYAL

GNLYAAQFWEVMQEQIPNLEQKISRGE LGDMQQWLKVN VHSKGS LYLP GELLQKVTGKPL  
DPSCFARYLNKKFS\*

>SPSA8\_v1\_50009|ID:41144989|recG| ATP-dependent DNA helicase RecG [Spirochaetes Bin 1 SA-8]  
MNVPTFVSLKKAQDRKH YRRTRKSCY TGFVFLFELNQPVSALRGAGSVA AAKLARLGIVT  
ISDLLSHYPRDYEDRTRYVPLSQFAKYPSVHTIAQVVRHDYIGYGRMKT LKIKIQDETSQ  
AELICFNRFLESRLPVGSHILVHGK FQFRY GELQSSTFEAEPVREGQQPSQGILPVYSL  
TEGISQGIMRKLVRQALAMYGLKIENELPADLIQKEALCDKALAIKQIHAPESMDALNRA  
RASLAFEELFYFQLKIAMRIQSRHQQLPRKKIQGLLSRLLERLSFQLTADQKKVLEEI  
TADQEA EHPMARLLQGEV GSGKTI IALLAALNEVERGGQAAIMAPTELLARQHAATAAKL  
LEPLGIRLAFLTGNINDQSRPNLLAALKEGAIDIVIGTHALFSDDVEYRNLQLVVIDEQH  
RFGVLQRIALFKKGRIPDTLMMTATPIPRSLALTFFGDLAVSSIRTMPPGRKPVQTHLAK  
LGHETKVYEFVRNQLMQGHQAYFIYPLIDESDKSDLRNATEMAKKLAEDIYPEFSVALLH  
SRLKEDEKNRIMDDFVAGRCRILTATTVVEVGVDVHNATVMVIEHAERFGLSALHQLRGR  
VGRSDQQSYCFLIYSDSITDDAKKRLKAIYESTDGFKLA EEDLNIRGPGEMLGTAQAGSL  
RLAIADPVRDLEMLKKARFEAFAVIKQDPALLNPEHLIIRKVLDSQEKIADSL\*

>SPSA8\_v1\_50010|ID:41144990| conserved protein of unknown function [Spirochaetes Bin 1 SA-8]  
MKKYEKIILDSRTPDEYVDNSLKS KSLTPAEKAALARVWMQQTGFTKEDILHARNRHPYWK  
KKKMEGADERTQRRLAMHDYTKGKT VVWDQRKLQEFLELNKKDASGRYVHKDWELAKRFG  
TTIPSIQYMRRKYKKVRDLLGPKARKEKII EYMGYSEIVLSNGGPAKKR\*

>SPSA8\_v1\_50011|ID:41144991| protein of unknown function [Spirochaetes Bin 1 SA-8]  
MIDLSALVNKTVDFA YRGSRLALDLSHALFSSYTIDAGTRLLLKEVAHDEAIVHADNLLD  
AGCGIGVIGIAMAASSPAMQVVMRDRDLLAVAF AERNCW RNGLPATRLDL DGQPAPAIEK  
KSPKHKCRTERTAPIIIAPGLGEDDVFGPYDAILSNLPAKAGPHILSYFIAACEKLLK  
PGGRFGFVIVNTLADMAEGWCREAGLSVYSKAATKSHTAFLTEKKAPVHSASPETARTLT  
VIPEGILGSLKKRASMIEFYTRNRLDTQLEHARLQTEGFWGLPEFDTLSYQTQLACEAF  
SQHAGSLLVRNALVFEPGIGIAALWIVKMF GPQSLHAVSRDLLSHFAVEHNLSKSAKTTI  
AHHSALELEQVEQASLDAVFWFPDETPMYDFYTPAWETLARTMKTGALAVITAQTGV IAR  
FEKSKPKELRKAGEK KKKKGF SALIVQRV\*

>SPSA8\_v1\_50012|ID:41144992|efp| Elongation factor P [Spirochaetes Bin 1 SA-8]  
MVRGGEINIGTCLLINGNPHIVVEREFVSPGKGS AFARVKAKNLKSGNVITQTIKTADFV  
EDAQVDLVDCQYQYSDGENFMFMNNENYEQFGVPISLHEERKPYLKEGETYTLVMWEGEP  
IDIKIPYKMVFTVVESENYVRGDTVSGATKPVV TETGLVVRVPLFIKQGEKILVNTETND  
YVERVNE\*

>SPSA8\_v1\_50013|ID:41144993| Lysine--tRNA ligase [Spirochaetes Bin 1 SA-8]  
MQAFWYTVLMDIRMMEIRSRLLTITREFFLSRGYLETDTPALAPSLIPESCLEVFATEYV  
HPIEGRTPLYLIPSPEIWMKKIIAETGRSVFQLCKSWRNAESRSRIHSPEFTMLEY YGLG  
LSSRDNIRLTEELFSALKTELSPSQALPPFRIMTMKEAWAEFARADLDALQSAEAMREAC  
RQRDLLVSPATSWEDAFNIIFLSLVEPNLPQDRPLVLNEYPAGIECLAKDIPGT VYKERW  
ELYVSGIEIANCFTEMANPSAVRAYFTSQSMKKKDALVPHNVDAEYADIFEHFPPCSGVA  
VGFDRLLMVLGK KDIADVQYFPFAGMGNADSRKSLQNLNFPQ\*

>SPSA8\_v1\_50014|ID:41144994| protein of unknown function [Spirochaetes Bin 1 SA-8]  
LIYLDEEAGRWYADKILQAAASRHFFSYNLLRKENWEPVVRVSWESATHADLWQCYQLDNL  
GALLVAAFRYAPDVLPESSERAERGLPALPSVSESYMRACSIGRFARANWYHEVLARLS  
DCARLVTEEAKTQ GKALFPPRQWHRFVNSKFPEKALAIAGLGTIGRNGLVIARRTDFTG  
LPGDDDCDTAVVEAGWSSAVVLGLMFLPFDFSAETDLPPRIMLEPLSLCGSCARCINACP  
SKALQFKEVPAYHRESCIQNYTSSAAPIPESVQKA WDRQLYGC DICLEACPWFKPDSAAI  
SVFGCIGGFFDADAISEMPDAQRLMLKGSALDQKWIEPEALRRNARLV\*

>SPSA8\_v1\_50015|ID:41144995|glyA| serine hydroxymethyltransferase [Spirochaetes Bin 1 SA-8]  
MSFIESFDPELWAAMQSEAA RQRDKLELIASENYASKAVMEAVGSVLTNKYAEGYPGKRY  
YGGCEFDMAENLARDRAKQLFGSDHANVQPHSGSQANMGVLFALNPGDTILGMDLAHG  
GHLTHGAPVSFSGKMYKV VRYGVRRDTETIDYDQVAQLAREHKPKMIIAGASAYSRIDF  
DAFRKIADEVGAYLMVDMAHIAGLVATGRHPNPIKIADFTTTTTHKTLRGRGGMIFVGN  
DRENNRGIMTPKGDALKKWSEVIDGTIMPGIQGGPLMHVIAGKAVAMKEALSPAFAEYID  
RVIANASTLAGSLSASGARIVSGGTDNHLMLVDLSPLGITGKEAEKWLDEANITVNKNGI

PFDQKSPFVTSGIRVGSAPVTRRGMGPAEMEKIAAFIMDVLSKSGDSAVIAKVKGEVLAL  
TKLFPLP\*

>SPSA8\_v1\_50016|ID:41144996| protein of unknown function [Spirochaetes Bin 1 SA-8]  
MRKTSFGIIAALLLIIAIGGAYWYFRPVIEEIEPKVFEPGQELSVQGRNFSILNSKPEIS  
FDGVPLPRYDFSVIDKVVITVKVPVTADSGILRVRSNLGWSNPRIVIAKEALPQQAQHS  
AQSIGPEISGIKPDEARIGDLIEISGLNFGTSTAFSAVSPFDSAPELLAGISSSGLRDAV  
SGLAANQRLAELWDDKTIMIRIPDFAGSGSLVVHTPQGNSNPVFLRIRQGTGSRTLQNP  
IYAVRQKVKIQRNAKAGDTVMVYIPTPALSALQRTSVVQESDTGVQGA VRKASESDGSY  
SIFEIYPAVSAEVTAEQRFLVAVYAVESDLVGYRDGFGAGGVPEYLQEYLKPDGLVPAGV  
TNLVDATAKKIIGKEKNLQKSAVLLWNWVQKNIKYVPEKEKPMWPLANSAASAFAAKKAGT  
RSFVLIVSALFRAAGIPALPVSGFLVRQDNVTIPHFWEYYPALVAVGWIPFDPVLAMNKAP  
AGFIPEFRDTGRYFGSLDNRHIAISRGLPEAVSADPAERNVQNKALWSFQNIYETSRTSS  
YESFWFDLEIVGRY\*

>SPSA8\_v1\_50017|ID:41144997| protein of unknown function [Spirochaetes Bin 1 SA-8]  
VTMRDVMMAHERRTALSFFLLFFMLSAELWAQSGTQPKPGTSSGTGTDSTLAGLIFQIRPA  
FTLSMEMVNALQAQEGSVSGSSKAQANPEILQRIDWGTITQVTQGAAPLDVKILGTNIV  
VLMQIFPVETSATKVSFLVQGQVWAKMPDNSLSYKTTVQTLSLAYGSRLYYYPLGIDAKA  
GAPLAVEIQVKKQSSH\*

>SPSA8\_v1\_50018|ID:41144998| protein of unknown function [Spirochaetes Bin 1 SA-8]  
MCPDDELLSAYCDGEVPSWPKERIEAHAACSKCSEIRTYAELHALLNSLDTEEEREAF  
AAARQRVFTAIQSKDFDFSRKSAGTIGRRLSEFWARPIVLPMPVAAAALVVVAFGLGSL  
GVLNPRAKDARVLASAVQTLASNASFDLSILQFAESQTSPTVTIRVQKDALIIQQGTPV  
IVTLPSNSIQEVSTTTVGGGL\*

>SPSA8\_v1\_50019|ID:41144999| RNA polymerase, sigma-24 subunit, ECF subfamily [Spirochaetes Bin 1 SA-8]  
LLVSGRHGGGTDFRSLYEAHFDMLMKVACRITNSMEAEDIVHDAFSKIVERNMDFPSTN  
DAKFWLIRVVKNNAINYSKRKGREARAYEKWWRSEASPIENIEAGSVTIKETGTEAGVQP  
SLEEDVVRDEASRELKALSALSPKLKEVLVLKEFSGMSYKEIGAVLGVSEGNVQVRAFR  
ARAALLTLLGKEDRHVSR\*

>SPSA8\_v1\_50020|ID:41145000|cysS| Cysteine--tRNA ligase [Spirochaetes Bin 1 SA-8]  
MRVMRLFNSMGRELQDFIPEQAGKVGFGYCGPTVYNYAHIGNLRTYIFEDLLVKTLLKRF  
YEVTHVMNITDVGHLSGDDDTGEDKMKVKSQAQEKGESVLKIAQFYTDAFFRXTQALGIARP  
TIVCKATEHVGDMLNLIKRIEANGYTYMAGGNLYFDVTKLPDYGKLANLRIEDLKAGARI  
EVDENKRNPHDFVLWFTKSKFENQALVWDSWPWGRGYPGWHIECSAMSMKYLGETFDIHAG  
GIDHIPVHHTNEIAQSEAATGRKPWVKYWLHAEFLVLDKKGKMSKSKGGFLTLQSLIDAGY  
DPLDYRYFCLGGHYRSQLSFSWEGMEQAKAGRKALLERVLALKERVGASDLPALDQVHPA  
VRERLEQFDGFLAEDLAVPRALAEWQLLKDPALPPADVLAGAYSMDQVLGLGLEQVKKS  
ETQVDESLVREIEGLIQERTAACKKAKDFAKADSIRSALKERGILLEDSPAGTTWKKNG\*

>SPSA8\_v1\_50021|ID:41145001|murB| UDP-N-acetylenolpyruvoylglucosamine reductase [Spirochaetes Bin 1 SA-8]  
MVMETLWQISQKINIDPRRILSNPMSRHTTFQIGGPADIFLXXASLNELSSALSFXXGR  
GIPCFVLGGGSNLLVGDGRGIRGXVLDLSGMRGCXRXTVIKQAGCSVEALCEEALASGL  
GGLEDFYGLPGTAGGAIFMNAFCYERDFSAPISTITAMSPEGIIRTIPTAELRWAYKKS  
FQPGEAMDGWILLSADFQLAPADAGTVASIMRMRKTDRMMKGYRYPYPSAGSLFKNNRAFG  
KPTGAILESGLKGYRIGDAGIATFHANIFINYGKASARDMLTLIQTARDKAWQKLGIEL  
EPEVLMVGEF\*

>SPSA8\_v1\_50022|ID:41145002| membrane protein of unknown function [Spirochaetes Bin 1 SA-8]  
MDFFNPEVGFISVILTVLVALVAPFLADKLGPIIASMTLAGIMLGPPELLGVLDATMFLQFM  
ASLGTAYVFFISGTESRVQLSPASGGKSLFLGGITFTLPLMAGFAFGRFAFGMDLASSLL  
LGAFFASSGHFRLPLLFRKDVLAHPSARVGKEGAGIXRILAMLILLFFSXVIPGQPLRFG  
IQHLVFALVYLALIAAAVPXIARA VFRKIKXDSLSLGTTFILLVMFAASFGALLAGAPTYF  
GAFAAGLALAPVFDSSRGASSKLDFIGETLFLPFLIFLGLISADFSAAAPISAIILIA  
SVLFGMGSKIAAALTAGKILRYNRTDTILLSSYSASFASFSLVFASVATNSGLFSKPLLS  
GAILVMVSSSLASLMARHSGSLILSEDHQEDAGTSKAQPERILVALSKPATANRLVELA  
CLAAQSSHRLIFPLAVITDTSGNIEARNAEATMLSAAVMRADASRTVVLPMTKTSVNP  
AE  
GILSAAEEANADTIVIGWNKXPRLSNAFFGSVIEQTVNASSQMVIARAMDAFAAPHLVL



IAPPLCEHHPGFPQAISFIAAIAEKSRAKVHLATLSGNASTISSVLNSKGLKIEHPFLEI  
SAWKDFSQMLMKKLPAGNKQFALLSARPSEPSWHPAMEKLPHVIGESFPDSDLMLLYFSNS  
GITPLNAPQKESAELETQETAAGLSVPMASEALTLLRNAINQGRVRVNMEHTAISDSMF  
ELVASAFPYDRAFTGKMSSRLVEILQRQPIEMSPGVLLVHERVPSITESIVCMGSSRNGL  
RISSLDQPIQIILIFVPEEQIPEKHLALLGKIAYLFNEKNLAEYLIEAATPEDVFAKLQ

\*

>SPSA8\_v1\_50023|ID:41145003| conserved membrane protein of unknown function [Spirochaetes Bin 1 SA-8]  
MIDFLTATGISFLVNILFFLIAVRRKSDIVTDLSYGLSFFLTALVLVYLHGIAGAVSLVP  
FILVMLWSLRIAGFLRLITFKVDHRFDGRREDPVKFAKFWGLQAISTSIIMLPVLATI  
SNPSSSFSFLQIIGSLIALTGIVLEAIADHQKFKFKKAGKTGFISTGLWSWSRHPNYFGE  
MLVWWGLYLYAVPMLAGWWHLAILGPVYITSLLLFVSGIPLLEKSADQKFGQDPEYAAAYK  
ARTSILIPRPPRLPGKTGKRSTMGIPAVHSLDMEKFKGRWYELARIPLPWARDWVQTSDV  
YEEGKDGFWNVRYEGKAGGASGPAKVLKQKLRIPDPAKPGEMEVSFIPGVWMKYRLIYFS  
EDGKAMLVTSKKMKYLWIMSRLPQIPEEA YASLVAKASEFGFDVALLEKVPQ\*

>SPSA8\_v1\_50024|ID:41145004| Ketoisovalerate oxidoreductase subunit VorA (VOR) (2-oxoisovalerate  
oxidoreductase alpha chain) (2-oxoisovalerateferredoxin reductase subunit alpha) [Spirochaetes Bin 1 SA-8]  
MKEKTFMAGFGGQGVISLGQMWVYCAMKEGLQVTFPPFYGAEKRGGIARASVIVSDAIEA  
SPLVTKADSVVMNQDSVPIAEELCKEGGVILVNSSLVKKDPNRPDARIVHVPCNEIAEK  
IGDVRIANMVMGALS KVTGAVKLDTFEAVLKSFFPPAKHKLIPMNIQAVQEGKQAV\*

>SPSA8\_v1\_50025|ID:41145005| 2-oxoglutarate synthase [Spirochaetes Bin 1 SA-8]  
MELVYGHPKSLKPIQTKYCPGCGHGVIIHRISEVIDEMGLQTKAVITNPVGCISWADLYF  
DFDSVQPAHGRTPA AATGVKRMLPDHLVICYQGDGDLAAIGTAEIIHAANRGEKFTTIFV  
NNAIYGMTGGQMAPTTLVGQYATTAPLGRDPGDAGMGYPIRVCELLATLQGTKYLARGAV  
NNPINVKKTKKMIRTAFAEQMRGEGFTMVEILSQCPNWKMDPVDSIDWLEKNMITYYPL  
GEIKNTLAPAGDAASAQN\*

>SPSA8\_v1\_50026|ID:41145006|vorB| Ketoisovalerate oxidoreductase subunit VorB [Spirochaetes Bin 1 SA-8]  
MSEEIRLMKGN EAIAGEAAIRAGCTAYFGYPITPQNELTAYMAANMIPKGRFTFIQAEEVS  
AINMVYGAAATGVRTMTSSSSPGISLKQEGISYLCGADLPAVIVNVARSGPGLGGISPSQ  
GDYFQSTRGGGHGEYYTIVLAPKGVQDAADLTYEAFDISDRYRIPVLVLADGLIGQMMEG  
VVLPEPKDPESLPVKPWKVGHQAEMKRDINHVS S MNLVPIELETANIARFKRYEQVKKEL  
CRYEEIDVEDADIILVAYGTSARISLGALQAARKEGLKVGLFRPITLWPPYDRLNQLAS  
MGKRFLSVEMSMGQMVEDVRLAVNGKAPVDFYGRCGGIIPSEEEVLAEVKRILAR\*

>SPSA8\_v1\_50027|ID:41145007|ptb| Phosphate butyryltransferase [Spirochaetes Bin 1 SA-8]  
MNHITDIIKAVSLGRKKIAVAAAQEASVLEAVADAWKAGITEPILVGDPELIEKARQEA  
NGGKGLDLSAFEIIPVKDLYASAVKAVELVRNGEAAFLMKGIIDTSLLLKAALNKETGIN  
AGRLASHVAVMEVPTYHKLFFVTDAAALNIAPDLPALIDIISAVKVSNSLGVATPKVAML  
AAVEKVNPDKMPCTVAASILTQMNRRGQIKGCIIDGPLALDNAISAESARIKKIVSDVAG  
DADILVAPDIEAGNILYKCLDLAQAAGAGIVMGA AKPIVLT SRADTAETKLASIALAAL  
ASGAGK\*

>SPSA8\_v1\_50028|ID:41145008|buk| Butyrate kinase [Spirochaetes Bin 1 SA-8]  
MPSCILVINPGSTSTKIAVFEENTRLFDKSVSHSSDEIKKYPSIAAQYGFRHEAIMDALK  
AQQFDMKRLVAVVGRGGLLHPIPGGVYRVNEAMKQDLESARYGEHASNLGALIADNIARE  
LGIPAFIADPVVDELSDVARVSGNKL FTRKSIFHALNQKAVARRFARERGRKRYEDVTVI  
VAHLGGGVSVGLHQEGKVVDVNQALNGEGPFS PERSGTL PAGDLAKLCFSGKYTEKEIMK  
LITGAGGMVSFLGTNDMRDVEKLYHEGDPAGTLYYNAFIYQVGKAIGALAAAACGKVDGI  
IVTGGIAYGKEIVEGLEKMCSFIAPVIAYPGEGELEALAQAGFGALAGEIVIREYTA\*

>SPSA8\_v1\_50029|ID:41145009| conserved protein of unknown function [Spirochaetes Bin 1 SA-8]  
VKHGFTKHDYEIIVKDTMIRVLNSIFWFLRGIKVYALVGSTGTGKSFRAKLVAQKYGIEM  
IIDDGILIKGDQLIAGRS AKKEAMYLGA VKTALFHDKAHRDEVVKALQHEKFRKILIIGT  
SEKMVQRICERLAIPPPFRIIKIEDIATQDEIQKALQSRKIEGKHVIPVPALEIKRNYP  
IFYDSVRVFLKRSFGASAMPKIYEKSVVRPEFTKRGRVAISEAALSQM VVHCVDEYDAS  
LRVRRMAIREDTQGYRITIFLDVPYGT RLASNAHALQDYIVDNIERFTGILVAEVNIVID  
RMRVKSGKNSRQLN\*

>SPSA8\_v1\_50030|ID:41145010| Phosphoglucomutase/phosphomannomutase alpha/beta/alpha domain I [Spirochaetes

Bin 1 SA-8]

MSMIFHPETGFDIGDPDIAPLALERLPSRETVLENASSLILSASGWRKIFALHTHDAEMA  
PWSLECAEDSLSTQISDSK VIAALMAKTFGEFILAAAGTAKPTVLLGIDTRPTGPTIA  
DIFVRVLTSMGIGVHYCFIISAPEIMAYAAAYAGSLPSDSEQHADGFAYISASHNPPGHNG  
IKFGLAKGGVLSAAEIAPLITRLKALLSGENPSAEAYS LIQAAIPAVVADCFSKTQHWKR  
QALSAYILFSHQVITGEAELEDQRLLLDMIAEQCRIRPLGIVAELNGSARSLSMDSSFLE  
SMNLKSKFYNAHPRNFVHRIVPEGDSLNLCKKLDDEMHTADSSFQLGYVPDCDGDGRGNLV  
FYDRHLAQSRLLAEQVFALSCLAELAF LHAQ GKASQCAIVVNDATSMRIEAIASRFGAS  
VFRAETGEANVVDLADSLARKGWLVRVMGEGSNGGTIISPRVRDPLSTIGALLKLLRLP  
ALPGKPDFLKLWLELSGQEA FYRPDYDLTDIVYSLPGWATTSVF EKRAALKVATEDKTVL  
KRIYQRIFLAELERKQGELARRYGIVSWKAMASIGIGEKDASTDFSASGSGGLRIVFSDA  
GGRPKAFIWMRGS GTEPVFRIMADV DGGTSEDEAYFLDWQTSMVRAADSEASSA\*

>SPSA8\_v1\_50031|ID:41145011| conserved protein of unknown function [Spirochaetes Bin 1 SA-8]

MGIRGELYSTRFVCNERTYFFNVKQNR TGDVFLSIVESKPGEGESFDRRSIVVFGEYMDG  
FLKAFQSALKFIDKTGKIVPEPDQTL YRERDGEAHQDEGREGRERKAQPRQSRFRD TDAR  
RPDSRGERSPAPFSARRTSPYPQSSSTRHHDHAPRNAAPRSPGGRSSAPRGASSREEGS  
ASKPVRKIVVRKTRKSDSN\*

>SPSA8\_v1\_50032|ID:41145012| protein of unknown function [Spirochaetes Bin 1 SA-8]

VDSPWIFHQTA AIAAAKPINFTLPDKKKRLAGATFALQMSFSQLLSLFLVFLTTFRTGF  
EAEPSSREEAPRGAELRPPGLRGA AFLGAW S\*

>SPSA8\_v1\_50033|ID:41145013|rnhB| ribonuclease HII, degrades RNA of DNA-RNA hybrids [Spirochaetes Bin 1 SA-8]

MAQKEFAFLTESSLCKRSPVLDEIALRGILHSVRFVCGVDEAGRGLAGPVC AA AVILPA  
DFPGEC LGDSKAMSAGKREKAYTIIVEQSLDWAIGWATHDEIGTMNILQASLAAMGRAVA  
LLELCPDIVLIDGNKVPALKYPAAAVIKGDSRVPAIMAASILAKVARDRVMDRLDAIEPE  
YGFSKHRGYPTLEHRKAIARYGPSLWTRPGFSIKLPQ\*

>SPSA8\_v1\_50034|ID:41145014|trxB| Thioredoxin reductase [Spirochaetes Bin 1 SA-8]

MAEKHELIIIGAGAAGLAAAQYGARANLDTLVLEAMAPGGQALLIDQLENYPGILEPVSG  
YDISETMRVQAERFGAKFASATVKS VKKTGSFFT IETFDG VYEAEA VIVATGSQHRHLGI  
PGEEEFIGKGVSYCATCDGPFK GK RMLVVG GDAACDEAMYLAKLSDKIRMIHRRDRFR  
AQKALAERVLANPNISVRFNTVAKMLKGTKKLEAVVLQDVVTGETWEEAIDACFVFGSD  
PQTAFIDDAAKDETGYLITNDTMETSIPGLFAAGDVRASPFQRQIVTACADGAIAAHAAAQ  
HIDELKGSAYK\*

>SPSA8\_v1\_50035|ID:41145015| protein of unknown function [Spirochaetes Bin 1 SA-8]

LTGSL LTCQLSARLNGNADVPI SLTIRNLYPTMNV MEEQQKVFLIAHESLMSELP AFLRR  
FDGGR TNWQIEA VIAPDSKLLNRITFEKAILAADAAL IPEQLKAM LLED SLPLVLLVSAG  
SDAQPF LNTRHDTFIRL VLCEHGVCASQIAESLISIRRNFEREEHLAARQDEIGSRFQNL  
LKALPDIVYILDEKGSFVFLNDAVRELGYEPHELIGRHFSEILHEEDRTRVSREAVLAHI  
RAQEA FPEIPK LFDERRSGLRMTRDLEVRIPNKT TGQILYGLVNA YGESSQALIDGMND  
VYHG PVTMGIIHDITAVKLYQKSLEENLAAKELLREIHRVKNNLQVIASLTHLRQMEV  
DDEKTRDVLAGLIAQIKSIAMVHEALYQ TENLQGVSAKEYFERFALFMEQTYSYIGSPIS  
LEVNAQDCLVDVEQLSYLAMIASELVSNA YKHAFPGNRSGFIRISFFLIGEEYIMSVEDN  
GVGVRAEAESGNL GLEIVQALARQLGAHLEQKFDGGINITLRMSGRRLD\*

>SPSA8\_v1\_50036|ID:41145016| putative Histidinol phosphate phosphatase, HisJ [Spirochaetes Bin 1 SA-8]

MLFSYHTHTEFC DGRASAASMAHHAHQAGYAYLGFSSHAPLPFD TNWNMRWERLGDYAAT  
IRALGNTYGP KEMTILLGLEIDYLENLVHPSDSAYDRIKPDFRLG SVHYITPEEGEAFTV  
DENATDFARHVKLSCLGDHSM LWKQYYRNL TAMIEKGGFDIIAHFDIVRKNNQNGMYFDE  
DAPAYLDAAFEAIDAAAQSDIAVEINTGGIARGKTLTPYPAMILLKRMHDKNVRITIGDD  
AHGPAHLGAYQQTARLWAKEAGYSSLFY LKQNGEWAETGID\*

>SPSA8\_v1\_50037|ID:41145017| C4 zinc finger domain protein, DksA/TraR family [Spirochaetes Bin 1 SA-8]

MEKTFTEQMRELLVSQKKEILDALATSNEEFRTIVAEMDPKDVADVASDDIDRKMLEALS  
SQDIKRLKAIDAAALTRISQGRYGLCMVCGK KIPQERLTAIPYAVMCIDCQKSEERRNR\*

>SPSA8\_v1\_50038|ID:41145018|infA| translation initiation factor IF-1 [Spirochaetes Bin 1 SA-8]

VAKEEAIEVEGIVREALPNTMFRVELQNGHILAHLSGKMRKHYIRIVPGDKVRVGLSPY

DLSRGRIIYREK\*

>SPSA8\_v1\_50039|ID:41145019| putative Smr domain protein [Spirochaetes Bin 1 SA-8]  
MDMDKLLKQWDELKKQEARKPKNTIEKAPGKVPGEPRRPEEKERSIHDQLGNWITIHGV  
EDKDSEYLDDEGQRSAAEAARRFRLLPEQAVLDLHGYSAAEAEPFLERFLQTSARKGLEK  
VLVIHGKGNHSTTEHVMTDLTRRVLERNKNAGSFGPADRRHGGRGATWVKIRN\*

>SPSA8\_v1\_50040|ID:41145020| putative 1-acyl-sn-glycerol-3-phosphate acyltransferase [Spirochaetes Bin 1 SA-8]  
MKSAQRYIPTNSVFFTRLVQNTYGVWLKRAYNIHAEGLEIFSKIKPPFLVGNHATLLDP  
FIVNAFIPHPVHWVASDGNMRNPIMRFLLIKLVGSIPKSKVIPDIETVNWIVNIIRKQKG  
VVGIFYPEGQSSWNGSSLPSVGSSAKLIKLLKVPVIAANSRGAYMTKPRWAYTRRPGGVIV  
HFSELFSPAQCKALSVEELDTALDKSIYHDDIAWCQQTGRSYDHPQRAECLALFACPS  
CGALNTLSSKGTAIRCHQCGFSADYQPDGSFSSIQGQKNPAAIKHDFRSLKNWDLWQH  
EHLARLIEEKFSKAPEKIIFQDADAILLEGKRMDTMRRIGRGTLLTADKLELVSSGNIL  
ASFRCQDIEGPGVLKWNFFEFYVGKNVYRVRFRNRNTSGRKYASALELLLKTPR\*

>SPSA8\_v1\_50041|ID:41145021| Na<sup>+</sup>/glutamate symporter-like protein [Spirochaetes Bin 1 SA-8]  
MDFSWKVIIDAGLISAALLLATLIRSKVRRFFQKYLIPNALTAGFLLLPLYNYVLPPIGYS  
KNGLGDLVYHLLNISFIAMSLRSSPPKVKGHKGGGVLGMSSGILMGYATQALLGLFLTLL  
FIPTVHHAFLHLPLGFALGPGQAYAIGKGWEGMGFEGGSSVGLAFAAIGYLWACFGGVI  
LINKGIRKGWVSADVLSMMKNTDLLRGTIAKDEEKPIGARLSTDSEAIDSFSFHVA AVIV  
VYFLSFLFLKGLTFLLSFAGKAGMDLAANFWGINFISAIIVRKLIDRFKISHVFDN  
ETLTRISGFSVDYMVAGALAAISLVFIGKYWLPLLMSTICGIMVFITVPWMSSRMFHDY  
RFERMLMLYGVSTGTLSTGLALLRVMDPEFKTKVSSDYMLSAGLTFLLAIPFILSINLPA  
KAFMTGMSY YWLMIGIAGLYLLYVLVTYVILARKKSFAPLQIWIYED\*

>SPSA8\_v1\_50042|ID:41145022| putative Transcriptional regulator, Crp/Fnr family [Spirochaetes Bin 1 SA-8]  
MDVVDLALLAGCSLFSGIEPTQLAANLAERKVSFLHFNKNASILLAGCKYSSLFILIQGE  
AWAEMISDEGKIVRVESFKAPEAFAAAILFSPDQILPVSVFAKTDCRVAVFGKDSLIALA  
MLHQPVMEALLAETGAKLQFLTEKLRS AQFGTLREKLADWLIRRFELSGSKTIITEANRE  
RLAELFGVARPSLSRELGNLAKKNIIEFEGRQITILDLKALQRLRSGHD\*

>SPSA8\_v1\_50043|ID:41145023| NADH pyrophosphatase (modular protein) [Spirochaetes Bin 1 SA-8]  
MMLIDPSEYAVFFNGLDVLVPLRKAEEDEFEAALFSDTEPFSRLAWLFPDEDTSGDASGKA  
FSMLGTSQIPTARFLHGSFRYVSLSLDDAAAEQLSRVLPFERIPVRQMLSLVSQEAARFL  
LKAHAHAHWSEVSRYCGACGSPLATGHDHGDPPGGKYCSACKRFFFPKISPAVIVLIHNGD  
SILLAHNRKFTAGRFGLIAGFVEMGETLEETVHREVMEEAGIEINNLRYVKSQPWPFPS  
LMVAFEADYKSGTARPDGLEIDQLGWFTRQTLPEIPPKGSVARSLIERYLQAGSAGKQ\*

>SPSA8\_v1\_50044|ID:41145024|upp| putative uracil phosphoribosyltransferase [Spirochaetes Bin 1 SA-8]  
VSKIILKAQDLGLLTDKDNEYLARMDSLYRQAMVSFNILSTTRSEREQKKEESSLIELY  
NTMGSLMHEICATEPRIQVYSFATPQENHGEASRLIAKLRDIKTGRQEFVYYIQRAFELL  
FNLAYGGAGSVNKNYLIVKTPVDIPVQNFVAHVKIPNVDDQLENTVMCVMLRGALLPSMII  
SKEIQEYSSTGYLTPFALFKIKRDDTKSENTMEYILDLDRSYFNLAELDGDLLFADPMN  
ATGGSLVTVVKYLLDQGIKPRSVKFFNVISALKGSRLRIIRDNITMYTLWMDPVLNERA  
YIMPGLGDAGDRINGKDEDEHPRDMIRLVADYGTNITGLYRSQRLRIIEETVLHH\*

>SPSA8\_v1\_50045|ID:41145025|pduL| Phosphate propanoyltransferase [Spirochaetes Bin 1 SA-8]  
MPETKVLVNLNRHIHLSREDVEALFGKGYQLTKTKDLMQPGQFACAETVTIKGPKGAFE  
GVRILGPERKETQCEILASDQFKLVPGCPVRESGQLDGSAPFEIIGPAGSVKKDKGLIV  
AIRHIHFDPESAHRFGVVDKQKVSLKVGGERGAVFLNVVCRVNPAYALECHLDFDEGNAV  
GIASGAIGEIVAL\*

>SPSA8\_v1\_50046|ID:41145026| putative Pentulose/hexulose kinase [Spirochaetes Bin 1 SA-8]  
MIYSIDIGTASMKGFFTRSGSCVAFKAPIRAEKGNIPPIHEISAFWLDAFKELTRML  
AGQSAAGGLGLHQPIEAIVVSGNGPTIVPVDKSGQPLMNAITWLDRRASAEAAEASEALE  
YKLDPAYNLPKILWIRNHAPDIYEKTRWFVSCPEYLCAQLSGNYVSFLPAEGFKKIWDE  
QALARLFLDAEKFPFPLPPASAVGVLTQPARAEFGLENLAEPGIPIIGSGPDLAALVGT  
ATIEPGRACDRAGTSEGINLCAAEELRDSRLLYMPHIIIEPYWNISGVISTSGKAVSWIR  
GTLGLSDLSYDEFFAMAETAQAGARGLLFLPYLSGERAPIWDPAAARGAFI GLGLHHGKAE  
MARAVVESTGFAIRDVELMEAGARVDDIRVTGHPASGRVWNQIKADILQKPVRAPEFY  
QAEVGNTCMALAAMGEFGDMAEASRAIVKTGLVYEPSAGKKALYDELFLGYRESYQALK

GIFPRLAGESA\*

>SPSA8\_v1\_50047|ID:41145027| putative HTH-type transcriptional regulator CueR [Spirochaetes Bin 1 SA-8]  
MKKSDNGLKIGDLASMFGLTARTIRYYEELGLLKSNDRTEGIHRRYPEKNIVYLNRIKYL  
KDYGLSLGEIKEFFDLAEKDRSGAACKELLLSKYQEKIAEEENNLEKIRIRLASLREQVA  
ALQSLEHFFSCPGDSCETCEFSMFCDEPEDEAP\*

>SPSA8\_v1\_50048|ID:41145028|tpn| Membrane lipoprotein TpN38(b) [Spirochaetes Bin 1 SA-8]  
MKRTLTIPTILLASLALSAQVFAAPLKIGVFIPGIREGSPTYDGLAKGAERFAAENPGSS  
VKVFEAGFNQAEWEEKLISLTAEGKYDVILTSNPSMPDLANKVVSALFPKQKFCICLDGQFA  
GNPNMYTVLYNQIEQGFTGYLAGLVSTSSMPGANSACKAGMLIGQHYPVMDKLIIPGFE  
KGLKAVDPAFQLDVRVVLGNWYDATKALELTKSMYDSGSDVVLPIAGSASQGSIKAAQDSG  
KYL VFFDADEYSRAPKNIVGCTALNQRLAYTVLKDAAAGTLPFGKADVVGIKEGYVEFL  
DRSPVYLALLPAAIRSKMDMKIQEIKSGKLTFAIPQL\*

>SPSA8\_v1\_50049|ID:41145029|yufO| Uncharacterized ABC transporter ATP-binding protein YufO [Spirochaetes Bin 1 SA-8]

MSYLVMMNIRKTFPSSGTVANDGANLSVEAGEIHAIVGENGAGKTTLMKILAGLLEPDAG  
TITIAGKPAVFRSPQDTKAFHIGMVHQHFIMVPEFTVAENIVFGQEPKAGFLFDTKIAE  
KEAARMIERFGFSLEPDALAADLSVSRQQLEILRQMYRETQLLILDEPTAVLTEQEIQH  
FFELLKTLKGQGITVLIITHKIREVKEIADRVTVMRDGRTIATLNTGDISEYDLSCMMG  
SASCLDFSARRRNPAGARTILDVKNLSITRKHHSMPLLHQVSFSVASGEILGLCGISGNG  
LKEIEEVLGFLQPSSGTLFQGKALPKSRTAPWLPNGIAYVPSDRMKRGVVLQKTWAEN  
YIALDRKRFFPRGIADRKSARETALRRIQDFSIIKAQPDSRMDELSSGGNIQKSILARELAD  
EVPALCVLCEPTWGLDLSASAMHEKILSLRDSGAAVLLISSDIDEIMALSDRIA VLRG  
TITAVHNSSDVTREYLGALMLGIHNEH\*

>SPSA8\_v1\_50050|ID:41145030| protein of unknown function [Spirochaetes Bin 1 SA-8]  
MSPGNIWAHSCWGFTMSIDKQGMNTREGFKIIIFTLTVSVLLTLVLLGAFASSFPDAVTA  
FFVRPLTNRYFFGNLLAAAIPLMIAGLGIAFAFSSSNFNLGXX

>SPSA8\_v1\_60001|ID:41145031|nth| Endonuclease III [Spirochaetes Bin 1 SA-8]  
VYLPPELWYGIASVRLGQVWASLEVKMEMNAIENSRLSEKLAKMHEILAPLWPDVPL  
LHYRTCPELLCSVLSAQCTDEQVNAVTPVLFSTRFPDAESMAEADIAQIESIIRPTGFYH  
AKARHLSSEAKLMSRFNGQVPQTIEELVTLPGVGRKTANLVVSACFGTPGVIVDTHVMR  
TAVRMGICDKPDPELIEMTIRKNLPESQLTAFSHALNRHGKHVCSARKPLCLTDMQRCPV  
AGX

>SPSA8\_v1\_60002|ID:41145032| putative Ornithine carbamoyltransferase [Spirochaetes Bin 1 SA-8]  
MNNSAMRGRSLLSWGFSKEEIRLILETAGKLFQEKSKNKLGHMKNKVLQFDNRSGAG  
MQTAGNRFSETALALAFQKESGILIPHFPLAASEQLLAPAIEDMARIAGQLANAVSCGN  
QEYLDALAGFSSRPVFNVTGNQENPLLALAVILLQNEVGDLRGKLLALTGEGDNPTIRS  
LLILAGKLGMAALASPQALWPKDFFNLCKKEAESSAAVVVSELTEVLLDADCIFTD  
SWLKSEPDALCVNVENLARTGKSRVILLHGMSAGRGPMSLDVFESPDSRVFSQFDALT  
AAARALCILFVK\*

>SPSA8\_v1\_60003|ID:41145033| Phosphoesterase RecJ domain protein [Spirochaetes Bin 1 SA-8]  
MKKVPNGIQQFIEQHDCFYVIGHREPDGDCIGSELALASFLRSMGKRTHVLSSGPFTKSE  
ILQFEHKFKNSAPPENDYERAAAIVLDCSSLSRIGSVGETMPDVPIAFIDHHASGEVPGE  
NDYLDETAPAVTAMVYLLMKAFGHKPSKEEAELLFFGLATDTGFFRHLDEKSSDTFEVAA  
RLVESGVS PKRIYSDINGGKTLFSRKMLGEILMRLEPHYDGRLLVS YVTLDDQKYGMA  
RDS DILYQLIMSVGGCEACFVVKQEAENSCTVGFRSRERVNVAEIAAKFGGGGHRLASGL  
VMQGTIDSVMDTLIEAFRPLFAEEEL\*

>SPSA8\_v1\_60004|ID:41145034| protein of unknown function [Spirochaetes Bin 1 SA-8]  
MESRASAPELGTKTKFLDEFDEKTSAAFFLLVRDVFRQPHYHGFISMEEASEVLQAYRSR  
IRSILERGLECNARQPAYLAICMRYLAKTYRREQQRQELREAVLESSWYSGFQFHDTAVK  
SMPTAIAENFPQEEFYQTIPPAVFFNPLKTEYRRILFLLKACELDDAMILEASVRMGV  
PYAWLLYL VHRARLIMEPQRLKKNQLQEKLNSTWVDLQILESRWMADEKSGKDVTRLSVR  
LEAVRKRYRLLERRASMKLLLPNKEIAKILQVPGKSVDSGLYYFKIRGTIKTRLSTGKR  
ENLAQA\*

>SPSA8\_v1\_60005|ID:41145035| Non-canonical purine NTP pyrophosphatase [Spirochaetes Bin 1 SA-8]

MEIVIATWNAHKADELRPLFPGHRLLLPSEVGLADCDIDETGSTYLENAFIKAETVFKLC  
GRPTLADDSGLSVAALNGAPGIKSARYGSADGTTKLDASARNALLEHMKGQADRRCAFI  
CCLVLMYGDNRFISVQETCPGLLTEVPRGFGGFGYDPVVYLPELGKTVAELTPEEKNRIS  
HRGRAASRMNRMLSILEPNK\*

>SPSA8\_v1\_60006|ID:41145036|rpmE| 50S ribosomal subunit protein L31 [Spirochaetes Bin 1 SA-8]  
MKQGIHPKYEKATITCACGNVIETRSTVKNIQVEICSACHPFFTGKQKLVDTAGRIERFN  
RKYGIKSTETK\*

>SPSA8\_v1\_60007|ID:41145037|rho| Transcription termination factor Rho [Spirochaetes Bin 1 SA-8]  
MASIRKSRMKDASAHNDIQEQEETTMNSESSQDSQSLFESHREDPSRSESPENRAPDES  
AAQSRGNEASSAGRPQRRLKVRKNTQPAAAPSMAAPAAQSGGFMEGAAAPEEPQEKLAE  
PETQTVEELQNGGLIRATFEPGSAIQEEKHNRGSHARKQEQPERISSDRSHDAAKLDHNE  
TRARLSINDLSKMGIKELRELGAKYGINHEDLIVLRKQELIFYILKSHTEHGGIYAYGS  
LEILPDGYGFLRSPQNSYLPGTDDIYISPSQIRLFNLKTGDTVYGGQIRSPKEGERFFAML  
RIEQVNFDEPAVAQNRIFFENLTPLYPNQKLNLETVTEETSTRIINLFCPIGKGQRALIV  
SPPKTGKTILLQKIANAITTNHKEVYLIVLLIDERPEEVTDMEERSVRAEVISSTFDEQAT  
RHVQVAEMVLEKAKRLVEHGRDVILLDSITRLARAYNQTVPTSGKILSGGVDSNALHKP  
KRFFGAARNIEQGGSLTIATALIDTGSRMDEVIFEEFKGTGNMEINLDRRLSDKRLFPA  
INIKKSGTRKEELLTEELQKIWVLRKVINPMDDSDIIELLIDRMLKTKNNEAFLKSMS  
SPVYNGND\*

>SPSA8\_v1\_60008|ID:41145038| protein of unknown function [Spirochaetes Bin 1 SA-8]  
MAKSGTTRKPLLFSTVLSKNIKATGNLSSSSSILIEGRFEGSLRTSSHVGIKTAADASFS  
ILSCGSAEIAAGKASGHIAAKEFIEALPKASIAADLEAPIVRIPDSCKFEGSIHTSMIDRL  
\*

>SPSA8\_v1\_60009|ID:41145039|hup| DNA-binding protein HU [Spirochaetes Bin 1 SA-8]  
MAEKLTKAELIDALYANLPSSSKTTRKDIHELIDGLFAEIKTAILSGKTVELRGFGTFEV  
KLRKGRSKARNPKTGEIVSVQDHGVAGFRPGRELKKAAWDMEALKAPK\*

>SPSA8\_v1\_60010|ID:41145040|rpsT| 30S ribosomal protein S20 [Spirochaetes Bin 1 SA-8]  
LSTKNLSAEKRMQRQDEKRRIRNKAAKSAIRTAACKVVTASEKKDAETAKAALLDMIKKID  
TAARKGIVKKNTAARKKSRMQKLVNKLGA\*

>SPSA8\_v1\_60011|ID:41145041| putative 1-acylglycerol-3-phosphate O-acyltransferase [Spirochaetes Bin 1 SA-8]  
MVNLFIVVILLCFSFWEIELLLAYLILPRSRSMRLAKRFESRAIRLIFSMFSTYRHFRI  
RPINKISGPLPERFLVVANHQSLLDIVVLMKILPEGLNARFVAKHELAWGIPLISLLRT  
TGHCLVKRKNDALNAMRAVAAMAKRSKRDKTIPVIFPEGTRSRTGDLGTFHSAGYRKLLE  
TDSLPILVIAVEGGYKVAKLKDFIRDFGTVPYKVSLLGVLPAPGGKKEALASLETARTMI  
ENELIQMRKSP\*

>SPSA8\_v1\_60012|ID:41145042| protein of unknown function [Spirochaetes Bin 1 SA-8]  
MKKFLKLLVTFGIMQYFYICGTTAKLLFMRLLLDVAAGNSSFSGGLFLPHPIKLETSQSG  
KVDTTAKACIS\*

>SPSA8\_v1\_60013|ID:41145043| conserved protein of unknown function [Spirochaetes Bin 1 SA-8]  
MNSTYNQIAEQDFYKARTRSLTRIYSIINRNDTRLLPFEEAKNLIRPESETYSGLATVP  
LEKIIGSEGRYRDFDRHFLPQKDMLEKWINIDKTHYEDVPLPPVRLYEMGGVYFVRDGN  
HRVSVARTRGQEYIDAEVTSLSKRIALTEDMSIETLKQRVIEYEKRQFYEKTGYLAIVRR  
DDLNFSEPGRYDTIYEHIVHKYLNQKSPQEIPVSDALYSWHENVYMPIIHAIYEETLL  
DLFPGRTDADLYLFLVRHWDELKHASKRDVGVGEAARHFRQTLKASKAEAGRLQGSALFR  
ALAEFFRKLQKK\*

>SPSA8\_v1\_60014|ID:41145044| Metallophosphoesterase [Spirochaetes Bin 1 SA-8]  
MKTVNILCVADEIDLLVYSSNIKERFGDVDLVLAAGDLPDEYLGFITAMLNKPLLSVAGN  
HDPSDVNEKHAFSQQAMLFMHGRERTSLGRLSFKIKKEAGVSVLGLPGSMFYNGGPNQY  
SDFAMWMRVIFLLPELLIRRLFLGRGVDIILAHAPPKGIHDAEDRCHRGFSAFNWLIHFA  
RPRYFLHGHIVYDVTQQLREQKAGDTAVVNVYGHRLISINLEKQP\*

>SPSA8\_v1\_60015|ID:41145045| putative DNA mismatch repair protein MutL [Spirochaetes Bin 1 SA-8]  
MGIHVLSRETSRLIAAGEVIDRPASALRELLDNALDAGASDISVLTEKGGIDLLRVIDN  
GSGMDRDDLALSIQEHATSKILKADDLLSVRTMGFRGEALASIAAVARLEITSCEKNSEI  
GWKLQSEPGKPPVLTTPVAARQGTVVTVQGIFEQYPARRQFLKKPSAEALLCRQVFTERAL

AHPHIQFSWSSGAETSRYPAGSLLQRMSLLYPELPAHLLSEVEINFETA AAFHLILAEPSPF  
HRNDRRYLQVFNRRKVP EWGLMSVVEYAYSEYLPGGMKPCAFLFADIEPSLADFNHPA  
KREVRKTIKESLKSLLYSSLKEQLHTLYGSGSMNMAEYSPAAGLAFETVPPSQKPDQSF  
ETVRTLNETPIKESDSSAFGTTGYAGERPTFRYIGRAFGPYLLFSIDDTLFIHQHAAHE  
RILYDSLLERPVSQALLVPYIFEPESDDMKNRLASILPEMKNFGFEIEKQHDAFIIHAV  
PARLGEKAIPAFLDFVQKPPNSRVSGIVATMACRAAIKDGDVLDLDFSAARELIAKSLQLP  
FPRCPHGRPIWIRLDRDYLDKMSGRNPG\*

>SPSA8\_v1\_60016|ID:41145046| conserved exported protein of unknown function [Spirochaetes Bin 1 SA-8]  
MKKIVALSLLLALLIPSA AFAQEGIGAGILGWARENLAMEMGSVTIDGVGYSKI VLAPEV  
RMGRLKLGLYLPVIYKDDLFPSTWYAPGGNNEWDFGAA YWGTNTMKALLDVASDLVLKI  
KYLEYGQPLEDKFFFKVGNLHDLTIGHGLIMRNYRNDTDFPSIRRTGVNVGYDFGAVGFE  
ALANDLPIPEIVGTRL YVRPIKGFKLAFGISGVADLNAGKDLAGTAWETAGENLVFIGSG  
VDLDPPIIPANPILGVRAFAGAAVTMPYVKANFTSPNNASTVTQGFRTDLIWDNAGPHNY  
GAAAGFLGNVLFIDWRLEYRYFTGIFRPSFFDSTYERARSLFVQEYVGYLDGTKGINSAP  
TVMGVYGEAGVSLFKEKLSFSAGYMWPWSFDAGFTLGDADDELHAGIVLKKGLIPKINVA  
GAVYYDKWGLVNQLASGTFQFFDAKSALSGEIEIPVSTPNLA VGVIFKTVVARDAAGNV  
LYVDDDPSKGVKIAPAITIETRFHF\*

>SPSA8\_v1\_60017|ID:41145047| conserved exported protein of unknown function [Spirochaetes Bin 1 SA-8]  
MRKFALVLAAILIAVFPLVAQETGTPSPGFSAGLNLGSDLLPTGAGGALESWSKLGFPDL  
SIGKFGVGLDFTIRFKLYPNGATPIEISPDWIPAGGQTIFDVYLPKIMYVRYGLRGVDP  
IYVKLGSISDFSLANGLVISDYANTRFLPDTRIFGLQAGLDGAAFKFPFLGLEALTGNIS  
KLDVVGGRVYIRPLAFFGNGIPGRIQIGATAVADQNPLLYIPTGDLGSPASKLIYVLGA  
DVTVPVLTGDLLSLTMFAEGAREMNGAMGAIGGLRGKLGIVKYGAQVRYLQEGFIPTYF  
DANYDLYRADRFKYIEDTVPGSFTPGWLANIGFTLNFNLFVFDATLDGPFAAIPSVATSN  
SGEYPHLKGSLLKDG LIGGLSFEGGYEKYFIGRAKPFQDIIDPTDAVIGLAVHYKTGA  
TVLTLNYAYRWDP SIDDWDVSSSLASVRF\*

>SPSA8\_v1\_60018|ID:41145048| conserved protein of unknown function [Spirochaetes Bin 1 SA-8]  
MDFFAKLESRVQSLNTNLCVGLDPSFSQDEISRLGSEACMRSALERNLTIIEKTAPFTAC  
YKPNIAFYEA FGSGLGLEVLKKTIDAIPKEIPVLLDAKRGDIGSTAKAYAQA VFGYLGADA  
VTLNPMYMGKDTVEPFLEWDDKGVFILCRTSNPGAPLIEELPVDGKPLYLKV AQEFASWSP  
RVGLVVAGNDPASLKA VRDVAPS VWILAPGIGA QGGKADEAMRAGSRADGSGILVVAARS  
VAEASDPGEAARVLRDTMRQTVSIRD PVADPLKQELIKYLIETGCFKLGEFTLKSGIKSP  
FYIDLRKLISNPAAMRAAGKAYARLASQLVYARIAGIPSAGLPLATAASLSTDKPMIWR  
MPVKEHGTGNRIEGSFERGEIVLLLDDLIT TGLSKLEAIDILRAEGLEVMDLVVLIERGR  
EGRADMEKAGVQLHAFLQVGELFDYCEQNGIIDS AKKHELEDFAGLKA\*

>SPSA8\_v1\_60019|ID:41145049| Transcriptional regulator, BadM/Rrf2 family [Spirochaetes Bin 1 SA-8]  
MRTTTRGLYALKSLLALAGNASSEKPVPLHRLAENEGISPEFLQQIFFKMRKAGLVAAYR  
GPGGGFYLA KAPEEITIQEILLAAGETLSISPCSP LGLSSDCNNQQCKLDDCKASRFLW  
GLQQEISSFAGSRRLSDFL\*

>SPSA8\_v1\_60020|ID:41145050| conserved protein of unknown function [Spirochaetes Bin 1 SA-8]  
VTPESGFNDKIEEQAA YLVNRLKNEKSLRRWARKNDFHALRLYDRDIPEIPLAIDRYET  
DRGIKLVAALYERPYEKSDKEESA WLDAMVGAVCTALSLDSGSVFIKVRKRMRGLS QYDR  
NSDSHAEAIVREAGLSFLVNLS DYLDTGLFLDHRLTRGMAASQSKGKSVLNLFSYTGSFS  
VYAAAGGCRLVTSVDLSNTYLA WCRKNFLN NVPDSIHEEVRMDVMLFLREARKAGRKWD  
FIADPPTFSNSKSPEDFDINLDWPELLERCASVLEPHGQILFSTNSRQLKWDGSKCPL  
EWQDITDATIPPDFRNKKIHR CWLLKAADR\*

>SPSA8\_v1\_60021|ID:41145051|rex| Redox-sensing transcriptional repressor Rex [Spirochaetes Bin 1 SA-8]  
MPNHKKISFAPSIRRLPSYLHIIRSAQARSEVYISGTVIANELNLEPIQVRKDLAITGIV  
GKPKKGY PVAELISSIEHYLGWDVNHRAIIVGAGNLSALS GYQEFRNHGLNILAAFDID  
PVKIGKNIHGVPVYSLDELESETV KLNPEIAIITVSPFAQSTCDTIVASGIRAIWNFTN  
VKLKVPDNVA VWREDLSSGYAMLSVMMQQR\*

>SPSA8\_v1\_60022|ID:41145052| protein of unknown function [Spirochaetes Bin 1 SA-8]  
MILPYLLHADWEEPLSMEMELPYGRLLQRIIETLTFLRQSNPQTSEASVSMEQVNAAIQ  
LYCMAPGIVNVMLNYKICVEHDLPLHPTVYYELKEARKYRINHEIAEIEKANRLYRRSIH

LARDVMMTAGIEETLDQFRHGIPRELLGFVYSGIRDKYTWRGSDPALLEKLADMVRASY  
KPDILIAAAHGSIMPSLLLAELLDIPLYFVRLSMFKRNDEEPIAISDEAWLFSYRESRA  
LLYDEDVAGGRTLSELFQERLKPLFAETRRTACSIRHAGAKIKPDYAARTWWD\*

>SPSA8\_v1\_60023|ID:41145053| putative Formate dehydrogenase family accessory protein FdhD [Spirochaetes Bin 1 SA-8]

VQASENNPENVAVAVLAGGSSSRCETGDKRELVIDGTALGRRVNLNALSLSDRVFIGSP  
HPSYQDLPISCFQDEIPGFGPLSGLHAALDRAETGWCYLLACDMPLVSPAUYALLLEKAR  
TAPEWGAFIARTSNGYLEPFHGLYSSRLKKPLEVFLQKHQTGGRRQSISSFLATVDFCAV  
EAEEVLACISDWQLFSSINCQREYDFDIKNYRY\*

>SPSA8\_v1\_60024|ID:41145054|tatA| Sec-independent protein translocase protein TatA [Spirochaetes Bin 1 SA-8]  
MFGRIGPMELILIALVIFGPKKLPEIGKAIGEAIKAFRKGSEKVTEEIDKATSPDAD  
EKPKVTDKNGKDDSTATPKA\*

>SPSA8\_v1\_60025|ID:41145055|tatC| Sec-independent protein translocase protein TatC [Spirochaetes Bin 1 SA-8]  
MSTAIGEEKDGPSMSFFGHLAELRKRLIAALAVFLLASIASFNWSEKLADFMIAQAQDMA  
FVFLSPPDLFMLYIKIALSMGLVISLPVIIFELWMFISPALLPREKRSIFFSLLAGGLLF  
ISGAAFSYFVIIPFTLRFFMSYQSAAYVKPMISINEYFGFVISLALSFGAAFELPVVASLL  
GAFGVLKAELLIRIRRIAVLLIFIAAAILTPPDIVSQVLLALPMLALYELSMILKRQEK  
RRAKKEAQVQISI\*

>SPSA8\_v1\_60026|ID:41145056| DEAD/DEAH box helicase domain protein [Spirochaetes Bin 1 SA-8]

MTFESLGLSPRMLETLAKKGFEEPTPIQSLAIPRLMAPGNAIAAKARTGTGKTAAFGIPL  
IERLSEARSNTQTRPVSAIILVPTRELAIQVTEEISSLKYAENPRLACVYGGASMRDQLR  
KLAQGVDIVVGTGPRVKDHIERGTLDLSTVSFFILDEADEMLDMGFIEDIEFILDSAAKD  
ARILLFSATLARPVLNIVRKRAGDIDIIEDTTETLPTELAEQVWIEVHERDKLEALSRIV  
DSEEEFYGIVFVSTKVEADKLAKSLGERGYDCEALHGDLSQEARERVLGKFRDKRISILV  
ATDVAARGIDIEKLTHVINWSLPHDPESYLHRVGRTRAGNSGTAITFVTPQEYRLLFRI  
RKISGTALKKKGKVPDVEGVIAIKKERIAARILARQEAEEADDGIWLALAKDLMEKLPPEK  
ALAYALAEGFAGQLDPGRYRELTEVSVDEAGVSRLFISAGKRDQMTPRSLVTIHKLSNL  
PDRLINSIEIYDEFSFVSVPYKDAEKIITEARKKGGFPQFSLAAPRGGARGRRDGGPPQSP  
RRASSQQGTKARRASSPRFHSRDERPGTGKRKPRF\*

>SPSA8\_v1\_60027|ID:41145057| Glutamate formiminotransferase [Spirochaetes Bin 1 SA-8]

MHRDAVVECVPNFSEGRDTKKIEAIAAIRAVNNVLLDVPDGPADTNRTVYTFVGGSPDAV  
VDAALAAARAWEQIDMASHRGAPRIGALDVCPIPVSGITMDECAELARDFGKRLAEE  
LNPVYLYEKSASRPERTSLADIRTGEYEGLSKQLQDPAWQPDFGPARFVPRWGATVAGA  
REFLIAYNVNLNTKDKLANEIALTIREGGRSAKNPDGSIARDAQGNAIKVPGRKAVRA  
IGWYIDEYRCAQVSINLLDYHLTPLYEVFEVVKEEAEKLGLLVTGSELVGLVPLAAIEEC  
GRHFAAKAGKSAGLPEKELVEIAIQLGLRSVSAFEPEHKIIEWNFRKPAPLARSILDF  
LDELSTDSPAPGGGSAALAGSLGAALAMVGNLTVGKKGYEAGFDELGAMAQKAQHVK  
KLAAGIDRDTEAFNAILEAGRMPKATEEQKKAREQAMEKASREAVLVPLENAKTCLEALV  
CTLTAAKLGNRNSVTDAGTGALLAKAGLESALLNVEINIKSMTDSQFTGQIAAETRTLRE  
QSGQILSEVLTQVEKCLSGAEK\*

>SPSA8\_v1\_60028|ID:41145058|potA| polyamine transporter subunit ; ATP-binding component of ABC superfamily [Spirochaetes Bin 1 SA-8]

VKGSDDAVSNVSKSFGSFAALKEVSVSINKGEFYSLGPGCGKTTLLRLIAGFEDPDQG  
QITIDGADVLGLPPDKRHCNTVFQSYALFPHLSVFENVAFPLRIRKVP SRLIKELVFKHL  
ELVQLEAHADKKPSQLSGGQKQVAIARALINEPSVLLLEPLSALDAKLRQHMLMELDA  
IHDKVGITFIYVTHDQQEALSVSDRIA VMNAGKVLQIGSPQIYENPASEFVARFIGEAN  
LFTGVVTRREGSLNLVDTDGFGLLVDDETEVAVGDRIVATIRPEKIRISTDRLGGPSIN  
VLHGIVHEPVYSGFQTKYIIRADSGALLTVFRQHANWSEGIPDIEWKDEVYLSFSARDMV  
IVERNS\*

>SPSA8\_v1\_60029|ID:41145059| ABC-type transporter, integral membrane subunit [Spirochaetes Bin 1 SA-8]

MKRNYGFAYAAPQALWLTVFFAAPILIIIVYSFLKKGLYGGVEPQFSLEAYSALANPTLL  
TVAFRTLWVSAAATFLTILIALPCGYSIARAKNQUALRFLVIVPFWTNFLVRIYAWAIL  
GNEGFLNHALRFLGFRAEGYQFLYNQGA VILVLVYMYLPYAILPLFSTIDKFDFSLEAA  
RDLGASRMQSYLRVMLPNIKPGIFTAVLFTFIPIFGAYAVPLLIGGKDSYMLGNVIADQV

TKTRNWPLASSISMTVTLITAILVFLFALRKPKEQKLVDRDQEALSPSASGGAA\*

>SPSA8\_v1\_60030|ID:41145060| ABC-type transporter, integral membrane subunit [Spirochaetes Bin 1 SA-8]

MSSLRHHGLKPVRIAMLFHARRALRKSAAASKLLPRKFAGSDMIFWIVILFLFMPLIVL  
FVYSFNASRSGEWKGFSLIWYQKLFTEPDLWKAFENSALIALTSAMMATMLGTLAAVGT  
ARYSFALKSYVATMSFIPMILPEIVVGVSLLVFFAGVGLKLGLISVWIAHTTFNIPFVYL  
LVSARLAESDPTIVEAAKDLGATEIQTLFKIILPMALPGIASAFLTAITLSLEDFVITFF  
VSGPGATTPLYIYSMIRFGVSPVNNALSVMVAGTVLLVYPLRNFLKVFAAR\*

>SPSA8\_v1\_60031|ID:41145061| Extracellular solute-binding protein family 1 [Spirochaetes Bin 1 SA-8]

MKHILRRIRLDVSALVLIVAALVFSGCQPKTAATPKKLFIFNWTYYPDSVIEKFEKEYG  
VDVIYDSFASNEEMFAKLKAGGSSYDICFPSGDYVVSIMIKENMLQKIDHKALKNFANVAP  
EVLAKCDFDPGNEYSHIPYMGAAAGVAVNKTQVQNYEHSWSIFSRKDLGKMMIMLDDMREV  
MGDALKFLGYSVNTTNEAEIVKARDLINNVWKNLLKFDAAEFAKNFAAGEVWVAQGYAE  
SIYAELDKSRWNEVDFIPKEGGPSYIDSMVILKNSKNVDLAKMFKIDFIHRPEIYAEFCD  
YFGFPATANTPARQLKKGDTWYSAESLDPCELKKDVGADLDKYNAAWQEIKVGK\*

>SPSA8\_v1\_60032|ID:41145062| Rhodanese-like protein [Spirochaetes Bin 1 SA-8]

MAFMNAVEQKIKAGARVVDVVRTWDEFEDHFPGAVCVPVDEIMAKAEELGPKNTPIVLYC  
ASGARSAYAARILKSMGFADVNTAGGLYDMPGF\*

>SPSA8\_v1\_60033|ID:41145063| CoA-disulfide reductase [Spirochaetes Bin 1 SA-8]

MKLVIIIGVAAGATAAARARLDENAEITILEKGPYVSFANGLPYRLSGDINKRSALIL  
QTAEGFFSRYRVKVMLNTEAIRLDRAKGVKVIARGKDGELEIPYDKLILAQQGIPFVPQVE  
GSDAPNVFRLWTIPDMKINNYINETKPTSAVVVGGGFIGLETAEAFVKRGLSTSIVELT  
SQLMPAADPEFGKQIQLAFEEAGASVYTEKSIRKINDKEYVELNDGTRVKADIVLMSAG  
VRPNLELAQKAGLVIGQAGGLVVDEFLKTDDDNIYAAGDMIEVRRVDGAKVRIPLAGPA  
NRQGRIAATNALGGSMRYRGAFGTGVFKAVEYTFQAQTGLSEKAAKAAGFDVRAVHIHKAH  
HATYYPGYEDLSIKLVYTADGRLLGAQAFGKEGVEKRIDLALATALAGRMTLEDLAELDLS  
YAPPYSSANDPFQMATFAAQNDLSGFSPFISPAEALKLFNDKGGTVFIDVRNYGDYKLGH  
LEGSVHLPIDELRDRLDELDAQKPIILISKAGFEGHLGVRILKQHGFKDVRVYVTGGIMSM  
RLFPQYQETTEE\*

>SPSA8\_v1\_60034|ID:41145064| Aminotransferase [Spirochaetes Bin 1 SA-8]

MKFSDRATAFAIQNELEKARQARLLQGLPVLNASESNPTKTGLLHEADELANALDNPQNR  
VYIPDPKGMLSARRAVAHLQKKGHDGQPDRLFLCASTSEAYAYLFKLLCDFGDAVLVPR  
PGYPLFDHLSMLEGVEATGYRLEYHHPGGWRVDLDSLETTLLQDTERRIKAIVVINPNP  
TGSYIHREERAAIERLCARHGLAIIADEVFFDFSLENTSEFQSFYNACSIILTFVLDGFSK  
RLCLPQMKLGWIQVNGPEAEAAQAIERLEIISDSFLSAGTPIQNAAAAALLEEEERFQRLV  
RERIKAVMTVYRTMFEYPGSPYRLLTCEGGWTALLQCPRYESEKNLSLGLLQDKGIFLFP  
GYFFDMEYEAFFAFSLILEPEKAAEAGRALLEYFRTLESA\*

>SPSA8\_v1\_60035|ID:41145065|folD| Bifunctional protein FolD [Includes: Methylenetetrahydrofolate dehydrogenase ; Methenyltetrahydrofolate cyclohydrolase] [Spirochaetes Bin 1 SA-8]

MSAKLIDGKAVAEQIREEIKSRVAQLRKKGVIPGLGVILVGEDPASVSYVTAKEKACEEA  
GIASFHRLPAEVSLEGLLGYVRAFNEPRVHGILVQLPLPRHIDEKAVIAAIAPEKDVD  
GFTPVNVGRMLLEPCFLPCTPNGVLELIKRTGVKTDGAHVIVGRSNIVGKPLANLFI  
KSINSTVTLCHTGTHDLASYCKKADILVACAGKPRITADMIKEGACVIDVGVNRVADPA  
AKKGYRLVGDVDFAGASEIAGFITPVPGGVGPMTITMLLQNTVESASRT\*

>SPSA8\_v1\_60036|ID:41145066|folE| GTP cyclohydrolase FolE2 [Spirochaetes Bin 1 SA-8]

MVDVQSMKDERQIPIQKVGKGVRYPILLKDKTEQVQHTTAVVNLYADLPHDFKGTMSR  
FIEVFELYRHDLSPNFLAMLRTIKKELDAETAYADVHFYFITKTAPVSGQRSIMS YDC  
SYEARVSPEGHRFVGVTVPVQTVCPCKAISKQGAHNQRGLVTLKVNLGPFVWIEDMVA  
LVEESASSDLFTLLKREDEKVFTEKAYDNPRFVEDVREVVYLRVDALGKFPWFSVEAENF  
ESIHNHSAYAFVEKHR\*

>SPSA8\_v1\_60037|ID:41145067| membrane protein of unknown function [Spirochaetes Bin 1 SA-8]

MADNYPVEQKDLSEKGTGIMSAAAGGVLLAVNALLGIPVLGWVLSAGLLGLGAVGLFGK  
TKTDKVSGLLSAAGVAGLMTVFMPLARTILFTGGTGLLIYGLVNIGSFVMGLKKN\*

>SPSA8\_v1\_60038|ID:41145068|miaB| (Dimethylallyl)adenosine tRNA methylthiotransferase MiaB [Spirochaetes Bin 1 SA-8]



MTYFFETYGCQMNKAESSAMEHILSESGWMTATESDADLIINTCTVRATAENRAWSRIR  
KYAADKKRKLVLMMVVGCMAEQYKDEMKKKVPAIDYVLGTFQKQTFGLILEQIQGGTTYD  
VHDETPSYVFSKSHHEPGSFRAFPIMHGKNNFCTYCIVPYVRGREVSRNPLDILAEIDS  
LDRAGVREITLLGQNVNSYAWKGDGILDFPGLLQRISGHLKARQTGIGWIRFLTSHPKD  
LSDRLIQVIADEPLMCRHVHLCIQSGSNRVLSLMNRKYTKKEYFLELVDKMKTSIPGLSLS  
TDILVGFPSETEEDLQDITLDVMRKVEFTYSFMYHFNPREGTPAVKLEGKIPEAVKKERLS  
RVIELQKAITSKLMQERIGQCDLVLIEDQSKKSKNEVLGRTARDEMVFVKADASRIGTFA  
TVRLIGISGNTFKAEVNA\*

>SPSA8\_v1\_60039|ID:41145069| exported protein of unknown function [Spirochaetes Bin 1 SA-8]  
MRKAAVFLFLSAVFWQAFQCQTSTTIKQQPIQAPPKIEFGKITIEQARKELAKVQGTSNM  
SAYLEAYALALPLDKALVLYREFFPKLPAAQQEAAARTVISLALIAGRLLDDAIFFLPSIS  
TAQARMLELRLCLATGKLQEAQMVLQRIRNPEQSKKTALSLQEDAEIKLLEAWLLYFEGF  
IEQSFSAAKPLVTTENEKSIRNEAFLLLWYIANSDAFAQIKSAKKGDFEKSIIKAAIGKES  
PYSIEHGIAGALKIAPSAWILESTRLSGLALSAPVAALSGQSAQQDKAGGASDSSAG  
FSRLQVGVFVRENAVVFQATLVKKGFKTVVEEQKNKDGELRWAVIVDAEGDWSQMQRARL  
KDAGFESYIVQ\*

>SPSA8\_v1\_60040|ID:41145070| protein of unknown function [Spirochaetes Bin 1 SA-8]  
MSDKTKKIVWLSVGISFFLLVVAGAAFLFLPSPNTSATPFSLTGKSEPKSKTPQDYVAN  
LPVSTMETTTTTKSGDIIIVYGNLSTTTTIQAPVPSSKPNTTSTQPAPVTTTIVVAPPA  
PKSIVTTTTTVVKQQQASPPTSTAKTTATTATTAAPVSSDYWIQAGSFSSKATADKLLK  
EAFQERGMVAAITVKDINGKSYQVKGVPYPSRDEAKKWIQTVKSVPGASAEAFVTQ\*

>SPSA8\_v1\_60041|ID:41145071|coaE| Dephospho-CoA kinase [Spirochaetes Bin 1 SA-8]  
MKTIVGLTGGYCSGKNQVAVILAAAYGYCIDVDALGHRALSKKELAGTFGSCIFDEYGG  
SIDRKALGALVFSSKSLLEKHESIVHPVMLSLDAELERSERVICINAALLYKFPQVLKCN  
YIIEVTAPLELRLERAKTRDGADRETALARIAHQEYLWKLPRVHPPVFFISNAGCIDDL  
ESSLARIPGLLPQDI\*

>SPSA8\_v1\_60042|ID:41145072|polA| DNA polymerase I [Spirochaetes Bin 1 SA-8]  
VKPSLYLLDVYAIYRSYFAFMNRPLRNSSGENVSAVYGGFFKFLFALFDQRKPEAFAAVF  
DSKGGKTIRHHMYEAYKATRQKTPEDLTAQVPLVEEILQALGVPMRLRKEGYEADDVIATIA  
NRCREEDRACFIISGDKDLLQLVGGSVKALRPAENFSFKLLDHDHDDVIGEWGVSPVQILDY  
LSLTGDASDNVPGVKGIGDKTAVKLIHQFGLSDAIYANLENITPESLKKKLIIEGRDSAYL  
SRKLITLETSLDLGLESLDALHLGALNRAQATPLFLALGMKSFAAPEPAPSRASAHNGF  
LFDDGTPPEVSGGATSADTAGASAAATQETVAQASDANAGTPKEGALSQPGVYAAITDEA  
GLSKLVDDCISKGCFAFDTETDSDLIMEAAPVGFSLCHEPKHSFYIPLVSPDSPVIARES  
AVRQLERLFSSRATLVAHNAKFDIHVMRRFGIRIENPIFDTMIAAWILDAESNSFSLGSL  
SERILGTSGLLYDDVVPKGTFFSSVPIQEA VRYAAEDADFTMRLHQYLDGELKRSDLAKI  
FYDIEMPLIPLTDMEERGISVDANALRQFGDELEIELARIEQEVWQLVGHEFNLASTKQ  
LQDVLVFERKLPVQKKTGTGYSTDTTVLEELAPLDPVPRLLLRNRMLSKLKSTYVDTLAE  
LAEKRGKIHTSYVQTGAATGRLSSRDPNLQNIPIRDEEGRKIRSAFTASPGNLLISADYS  
QIELAVMAHLSGDSNLIQAFRDGVDIHRRTASFIFGIPEAEVTPHRRVAKTINFGVIYG  
MSAFRLARDLGPINARAQAFINSYFSTYSGVAAFIRDVITQTEKTGFASTLFGRRRKIPA  
INSRNKTEQMAAQRVAVNTPIQGTAADIVKIAMIQVQRELDNYLPDVRMLLQVHDELVE  
CPAGIVSEAEKLVKDVMEHAVTLRVPLRVSVETAFSWGDHMH\*

>SPSA8\_v1\_60043|ID:41145073| putative Heat shock protein DnaJ domain protein [Spirochaetes Bin 1 SA-8]  
VDQLFDRLERLVKSWINAGADASFSPSGFSSSRRTSSGDPDLDAAMAELDDFLDTSKTET  
ERREAEAKRREEAMRAEAERREWSARQEQRNFYRSGPNSGSGVVSQEETSKAIREAYAYLG  
LPA YAPFPEVKSAYKLLFKYHPDRNSSSPEALKKATETSTRINAAYQIIIEAYEARKGK  
QGAFR\*

>SPSA8\_v1\_60044|ID:41145074| putative Pseudouridine kinase [Spirochaetes Bin 1 SA-8]  
MKHASKGFVALAGGINLDIQGISNSAFRSGDSNPGRISSPGGVCRNIAENLSRLEIPVT  
LISAFGKDPEGESLKRDCNLKIDISLSTAAGNTARYLCLASPDASLIGAVADMEIMEA  
LTPDFFESRKAALAGAAAIVVDNLPEASIGWFARQFGRTGRVWRAGGKGPVLILDVSA  
AKAPKARGVLAEFDLAKPNLEEAKVLAGLECSAEVEASQILEALHSSRALPAELYISLGE  
RGILYADSELSETGLVPLPPHNVRPEAKNRSGAGDAACAGLVYASLHGLPMNEKARYALA

MAVIAAAALQTVHPEVDLLMLKREKERFYESIS\*

>SPSA8\_v1\_60045|ID:41145075|yeiN| conserved hypothetical protein [Spirochaetes Bin 1 SA-8]  
MNPYLEISDEVASALREGKAVVALESTIISHGMPWPKNLDTALEVEDVVRAGAVPATIA  
IMNGKMKAGLGKRELEALAKSGHEVAKASRRDFRLLAERATGATTVAGTMIVASFAGIP  
VFATGGVGGVHRGAEASWDVVSADLEELAKTSVLVVCAGAKSILDLPKTLEYLETRGVPVI  
GMGTKELPAFYTSHSGIPLEEQADSPAEIASRMRAKWACGLSGGIVVANPIPAEFAMDPT  
TINLAIDQAVREAEAAAVK GKELTPFLK RIVEITGGDSLESNIALVKNNAAALAEIAVA  
YAL\*

>SPSA8\_v1\_60046|ID:41145076|glcD| Glycolate oxidase subunit GlcD [Spirochaetes Bin 1 SA-8]  
MTSTYGRNLNSAIAAKLKEICGAQQVLYEDKGAMERYSHDETAEKQYAGMPEAVVFPQSTA  
QVSAIMKLASEQHIPPVTPRGAGSGLSGGCVPVFGGIVISFEKMNKIKEIDLENLMIVAEP  
GVVTNSINEALKKDG LFFAGY PMSLET CFLGGNVAENAGGGKAVKYGVTSRYITGLEVV  
ANGSVMRLGGKLRKDV TGYDLIHL MAGSEGTLGIVTEITLSLLPAPRYRAILLASFSSVE  
SAISAVPRIMTGSRIPTSIEYMDRASILASCSYLN ETIPYGEAHAMLLIEVDGTAKEEV  
ARSYMSIGDVCESCGANPVYVADNR TTM DRIWNVRRNIAEALKVQSPHQSL EDIVVPTAA  
IPGFMRELAELSRKEQVQIPCYGHAGDGNLHATIVKPDSWSMETW LARLDGILGELYRIT  
RKFGGTISGEHGIGNKRKKFISITLDPVALEMMKQIKQAFDPDGILNPGKIFP\*

>SPSA8\_v1\_60047|ID:41145077| Electron transfer flavoprotein subunit alpha (modular protein) [Spirochaetes Bin 1 SA-8]

MTIIVLVKQVPETDSLVMDEATGTVVRKEDSSIIINPLDLYALEAALRLKDANPDTKIIAV  
SMGPGHAAAALAEAVSMGCDDAILVSGREFAGSDTWATAKALAAAIKPAGIPDLILCGER  
ATDGDGTGQVGPEVA AFLGLPVM TYASSLSMEAGSLLIERILETDIEKIRMPMPCVISVTK  
AVGEPRLPTLSGKKRSYGRSIPVLGIKELMLNPETVGSKGSPTRVVRISSPKIARHSAFL  
DAADPEGKKRAIAAVIAALED RGLLPETL TSASAVASAQASAYAGTQRQDDSPAETQTA  
ARGSSGTKRSVWILAEARHGKVLPISELLQWARS LGPEENILTTAVLCGPASEPEILFS  
YGADRIIHCPSRLAPHEIALTARYLDSLLASESPD VFLAGATTYGRSVMPYLAALSSFG  
LTADCTSLSLDIASGELLQTRPAAGGNIMATIRTIGKRPQMATVRPHSQKPHLMQSAASC  
VFEKRDLDGPFSGNSVELLEEKPLKLD ETLDSKVRIVAFGRGLKKKDNHILRDLAQLVD  
AGIGASREAVDRGWADYPRQVGLSGHTVSPDLYLACGISGAIQHLAGMQTSGFIVAINTD  
PDAPIFSVSDIAVRADVDFLPSL TEALKNHLSAREAQR\*

>SPSA8\_v1\_60048|ID:41145078| conserved protein of unknown function [Spirochaetes Bin 1 SA-8]

MKILRYEKGGLFYGFLDGQAI VRAEGDLSIGLTPTKHQDSLAEVRL LAPCVPTKGV CIG  
LNYRDHAMELGLALPTAPV VFLK PSTSLIGPGDWIDYPELSHRVDYEAELVA VIGKKAKN  
VLPEQALEYVLGYTCGNDVTARDLQPKDGQWTA AKSFDTFMALGPWIETDL DPSNLKIRA  
ILNGAQKQSSTTANLIFDVPHL VSWLSRIMTLLPGDVIMTGTPSGIGPMQKGDEIAIEIE  
GIGTLINRVR\*

>SPSA8\_v1\_60049|ID:41145079| Malate permease [Spirochaetes Bin 1 SA-8]

MVVFSRVLSIFILVVVGFAARKSKILDGSMVKGLAGLILNVAIPFTIIASFDRSIPSSAM  
PDLRLMALWAAIHAFGILFSAALYRRMPAAERKVLTYITVFSNCGFMGFPVTESVFGKV  
GVMYASIFVIFQIFIW TYGIYLFSGQSGKDQLMRAILNPGNISVAIGLVIWLLPFLSPD  
ALTTAISNLSNLTTPLSMIVVGATLAEVPIKGILKGGELWFGTTIRLIAMPLAVFGIMRL  
FGFHDLPAKVA AFLTAMPAAAQTVIFAERYQADVPLASRIVFLTTVFSAITIPIFALFLV  
\*

>SPSA8\_v1\_60050|ID:41145080| exported protein of unknown function [Spirochaetes Bin 1 SA-8]

MKKAFFSILVLALAISLSGCASMLKSMGGVTKAELAAQEDRLTSKIESTNAALAKTNAAI  
AEIDSIKARLEDLSKQVEKATLSALEMEAIKAQLAQITTDLEKISDTLLNLAKLINDAL  
SQTGATESK\*

>SPSA8\_v1\_60051|ID:41145081| ABC transporter substrate binding protein (fragment) [Spirochaetes Bin 1 SA-8]

LAVFLLVETWLIRYFPGFPAKSVFYNTVEEKMKRLMIRLCGTF LFLALLVSCGKPDTKL  
IGIAKFVAHPALDAVEKGIIDEIAKSKPEYKLDLQNSNADMSTAAQIAQRFKQEKVSVAV  
GIATPTAQALANQIKNIPVVFSAV TDPV SAGLVPSLEKGGANVTGTSDMTPVRQQLDLLR  
ALQGNLKR LGHIYASGEANSAAIKIVQAYCEENXX

>SPSA8\_v1\_70001|ID:41145082| protein of unknown function [Spirochaetes Bin 1 SA-8]

MVLDRQIDVGFGRKVQYAPRTHLNEYLVKKNLVAIVSSTHPLAGKKSISLDELRIPL

ILPHRDVLTRRSVEERFHQLGYSVDLAFEVSNTEAIKRMVACNLGASVLCQSSVQKEVEA  
GWLSALLVDELDLSRFIYIITRKTEKIPPLDDFIQFAIASFSGNL\*

>SPSA8\_v1\_70002|ID:41145083|mdh| Malate dehydrogenase [Spirochaetes Bin 1 SA-8]  
MSEDITWWSFDEVEAFMKAGFEAVGVVPSSEEAAVCANVLIADKRGVDSHGVDGGRYKPIYLD  
RIWAGILNKTNFEVVRETPTTAVIDGHNGMGHYIAKRAMDMAIEKAKEKFGIGMTVCRNS  
THYGAAFYARMAVEHGMIGLTTNARPAIAPTWGVPEMLGTNPMTWGMPTDEDFFPMLD  
CATSVTQRGKVELYDRLDKDLPDGVVIGQDGKYRHDTKQVLVDLTRDLAALTPLGGLGED  
MGYKGYGYAMVVELLSSALSQANFMKALSDLGPDGKKKPIELGHSFLAININAFCDLED  
FKHHVGEVCRQLRASKKAPGAERIYTPGEKEHDVWLYRKDKGVFPNAPLKKSFKEVKERC  
KLDIELPF\*

>SPSA8\_v1\_70003|ID:41145084| conserved membrane protein of unknown function [Spirochaetes Bin 1 SA-8]  
MELINNLLTGFGLIGIAPILAITAGVIFGIWVGAMPGLSPSMGVALMLPFTFRMPSNIA  
LIMLTAVYLASNYYGGSITAVTINTPGTPSAVATAFDGYPLAKMGKAGWGLGISLVA SVAG  
GFIGIILILFSKPLAAVAVKMHPAEYFMLAVFGLTTVASLGGKNGIKAFAAALLGLLIN  
TIGLDPISGVKRFTFGQVNLFDGDFIPALIGLFALSEVFSRLEEGFSKEKIDYKLEKKK  
EQWPTLKDYWKLRRVTVQSSVVGTLIGIFPGAGSAIASFVSYDLAKRTSKTPETFGKGNP  
EGVAAAEEASNSASVGGAMVPLLTLGIPGSAATAVLISALMIHDLVPGPMLFANQPVLVYG  
LFASMLVANIIMLIIGALGSQLWIKVTRIPQQLLIPLIISIAVVGSAFVKNMFDVFI  
GFGVLGWILKRHEYPMAPIVLMVGLKLAEANFRRAVIMGGYSIFFTRPASVVLLVLSIL  
SMALPLIQTYRDKKAA\*

>SPSA8\_v1\_70004|ID:41145085| conserved membrane protein of unknown function [Spirochaetes Bin 1 SA-8]  
MNAIGRLGSFLNSKTGLLIVAGVFLAYLVIGYIAAKPLAKKHRYRQFVILALIFISILF  
LIITYSFRKSGVVHSGVIPRLWIFGILACCVYLLITIFTGKESPDPEGSLQRPIIFILV  
TLIYIVLMPYLGFFIASFIFLAAAIMLEYRRWGVILAVSAGWIAFNFLFYKLLFVFPF  
QGIILKLLQG\*

>SPSA8\_v1\_70005|ID:41145086| conserved exported protein of unknown function [Spirochaetes Bin 1 SA-8]  
MKRFVFAVLA VMMLLSAFMAGAQA KFPSKPIRLVVYTAPGGLIDITARKMVQIAAKYTDA  
TFVVENKAGAGGLIAWEYVLSQPADGYNLFAVTRSNIANLISTGSDMDPFTLDWMALLVS  
DPEAIIISTKSKLQTLPEIADAKARPGKQIWIAPPIDEYVTYKFEWKTGITGAFVFPD  
SGAQAMA AVIGGQGVYVGNAAADLAGKPDLMIAIAAEKRLAQFPNVPTLKELGIQGMDM  
ESIWRGFTVKKGTPADIVKWYDDLFEKITNDPEWKAFFEKDGMELVHFRKDRFEALIRSD  
MVEMKKFLKP\*

>SPSA8\_v1\_70006|ID:41145087| conserved protein of unknown function [Spirochaetes Bin 1 SA-8]  
MADVFAKNVATS AEEAAKIVPRAEFRVFGQGVIDIVTEKIWNKTVLQKQKMPKETYFL  
SIHTNEANVKVRDGLLDIKTKVGETPEGYEIFQPRGKFQFPVKKEDLATILSHLKVSMNL  
TQDSYTIIEFIEMARKHPDLTPVA VEKLRFGFTIDGIICEYAQVWFNGAMIESACVESEN  
YAGMKLVVESLGLSGMPNTNYLKA AKRVVGMEA\*

>SPSA8\_v1\_70007|ID:41145088| Inorganic pyrophosphatase/exopolyphosphatase [Spirochaetes Bin 1 SA-8]  
MSARTNAGGLSGFLQEV RINKENAREVWVVMGNEAADLDSMASAVCLAWQLARKNRQAGT  
VFLPFIPILREDFRLRTEAAFLFSEAGLSETDLFFADDVNLEALGKNGTLRLVLVDHNKP  
GKAYAA YLPNVAGVVDHHQDEGLFPELKARNIEPVGSACTLVAEKILKNGMSDISSDVAV  
LLAGTILLDTVNLDPAAGRVT PKDEAMVSALLPIARKSQQVLFDRQLQFEKFNVASLSTFD  
LLRKDYKEYTAGAVRYGMSSVLLSLESWKKKDSKLPEELKRYAESRKL SLLFVMNAYTEP  
KFTRELVVYSPDSALFKKIDGFLKATDLGLSTVPAPAGSTPDCSGWFAQANESYSRKKLQ  
PIIQFLES\*

>SPSA8\_v1\_70008|ID:41145089| protein of unknown function [Spirochaetes Bin 1 SA-8]  
MTAYNIFDLIGGLAIFLFGMIMMNDNLTA FAGTKLRSIMILLTKNKFRGYLTGLGVTVLN  
QSSSATTVLEAVLVGAGLMTFQQSLAVTLGAELGSTVLD SCLPSQR\*

>SPSA8\_v1\_70009|ID:41145090| putative Na/Pi-cotransporter family protein/PhoU family protein [Spirochaetes Bin 1 SA-8]  
VAIGFFTFILAKNKKQKSLANTILGFGLLFLGMDFMSRAMEPLRHS AVFMSLMSRIEPI  
LGVLVGLLFTMIQSSGATSGLVIA MAISGAILTEQAVPINLGASIGTCITAILGSLSN  
REAKRSAYIHVVFQITIGVSI AFILLMIPFRNERFYIYLAKEFSALFPGGRNNLARQIAMA  
HTLMPMINHVFI FPMPLPVITKIFNKLV PPEPPKEVFGAQYLSETMLSEPAIALIQVKEL

LRMAGIIESMLDKARIMLVDRSLDTGKEIKKADKMVDTLRTEIIVYLTKIAKNPLSEQES  
RMQTAYLFLASELENLADVIERNVLDRIKKLVNKDLYLSEEGFSDIMKMSEIVIGHFKLF  
VKSLAEEDAGKALEVLKDVENSRELLNELRRKHFQRLNNGVVSISLDTTEIHMDLLSHLHR  
INKHTNHLAQTLMEMSAS\*

>SPSA8\_v1\_70010|ID:41145091|trxA| Thioredoxin [Spirochaetes Bin 1 SA-8]  
VVEHLTKETFLSKVFDYENKKEWEYQGELPAIDFWAPWCGPCKMVGVPVLEALDKEYEGK  
IQVYKVNTDEEQELAGAFGIQSIPSLLFVPKEGQPQMAVGALPKSTFQSAIKDVLGVAL\*

>SPSA8\_v1\_70011|ID:41145092|hutU| Urocanate hydratase [Spirochaetes Bin 1 SA-8]  
MNLVDFEFPDPVFEPGIRRAPRDAELSPSQTLLALKNSLRYPKWHKLIPEFLQE  
LREHGRIYGYRFRPAGRIQGKSINEYPGACIEGKAFRVMIDNNLDFDVALYPYELVTYGE  
TGQVCQNW MQYRLICKYLEVLDHNSTLVLES GHPLGMFKSHELSPRVIITNGLMVG MFDN  
QKDFNVAAALGVANYGQMTAGGW MYIGPQGIVHGTYNTILNAGRLKLGIPHDKDLAGRLF  
VSSGLGGMSGAQGKA AVIAGAASIIAEVDASRIQTRY SQGWVSSVAKTCEDAFAQAIASA  
EKKEAIAVA YHGNIVD LLEYAETHGIIHIDLLSDQTSCHV PYPDGGYCPAGISFEERTQLLA  
EDRERFRQLVDKSLRRHFEVIKKLSSKGT YFFDYGNSFLKAVFDAGCKEVS KNGLDEKDG  
FIFPSYVEDILGPELFDYGYGPFRWVCLSGNPEDLRKTDKAAMDCINPERRGQDRDNWIW  
IRDADKNKL VVG TQARILYQDALGRMNIALRFNQMVRDGEIGPVM LGRDHDHDTGGTDS PF  
RETSNIRDGSNMADMATQCFAGNAARGMSLIALHNGGGV GIGKSINGG FGLVLDGSERV  
DSIIRMAMPWDVMGGVARRA WARNPHAIEVCGEYNDRYADLGNITLPEP VDEDLVKKLAQ  
DEGVI\*

>SPSA8\_v1\_70012|ID:41145093| conserved protein of unknown function [Spirochaetes Bin 1 SA-8]  
MAKNRALGQGGKNQNFESLFLLEMKPRIPDNWLMRNDIKIIRELGLGTNFIAAPYLQKGE  
SEYSIRNQQLAALGKSPNSYRKLKPFIEISLVRNHNTCS DWSLFLVTDPFVPELINNNVF  
SGLIRIGKLERVALEHHD LHLFAGISNSKIIACDIGDNCVISNSAYIAHYIIGDNCILLE  
NAEIHASNHAKFGNGIVMEGEDESVRITIDVMNEQGGRWVYPFEDMNCADAYLWARFRDR  
PKLMEQFIRMTDASVSHKRGRYGVIGHGSVLKSNRVIKDV MIGESAYIKGSNKLK NLTIK  
SSEARTQIGEGVELVNGIVGYGCRIFYGCKAVRFIMRDNSALKYGARLIHSILGENSTI  
SCCEMLNLIYPAHEQHNTSFLISSLVKGQSNIAAGATIGSNHNSRAPDGEIEAGRGFV  
PGLCTSLKHSSKFASFCLLSKGDYR YELNIPFPFLIDNDYRHDRLVINPAYWWT SNLYA  
LMRNESKFKSRDKRMDKRLNFEYSPFAPDTAQECLAAMALLEELTGESASKQAASGTIAD  
PTLEKLIRSEIQRTADEKPRDAAGQKMIYRKIGRAILNASDDL PFAVRASSMEHSDRE  
CIIYKPVRAWHAYREILLWFAMRTISDYALARGIGSNAYEALAIELAADTWICADTTWEN  
IGGILVSDARLNLLLEKTEQGMYP TWAEFHQEYKSLSEIYPLDKARYAWAILQILNQPSQ  
DSEETA EKPDSPRKVLKALLEAEKLCSSIEAGVTSSRAKDYSNPFRLATYRSKAEMDA  
VLGRLEENPFITHTKIEMAELKKA FSYLRELLSHEM\*

>SPSA8\_v1\_70013|ID:41145094| protein of unknown function [Spirochaetes Bin 1 SA-8]  
MRMDYTETSMMDNLLSDSDKHALELFYSLETAKGSMRESYAIRLADVLGNPGEFSFYLC  
SEDQRLIRTFHLLRVFRENVELLIHKTWVNESDEKPKQMLLEELKIFIEDYREGRIVSAF  
RRFVSIKAVPALLFGPTGRAPDFLEYAFRIDPKFGLFFWVNELEKQIRNAQTLEDRES  
LYRIETLLGAYILASM\*

>SPSA8\_v1\_70014|ID:41145095| exported protein of unknown function [Spirochaetes Bin 1 SA-8]  
MSSALQLAFLASLFTAGTDQQLSKYSIVPRQQEVNTCGFAVAAGILRAATDDVPSVV  
PDEAALTAIFAQHDSAGK PETATMLDLLRIFSQHGIAAIPFRGNIEDAVGMLSQGIPLVT  
HLKSPTEHFILAA RLS PFGMAAADPDVGFQIMPMDDFSARASGFFIALPDLRNNASFLDR  
VNKANALELRQMGGFFSHLIGGGILQKPAPPKGKVQSGKVQRESRESSLGFSVALFGSTTA  
SAAPGLLLPAEAVEVSARLDGRLSSALS YGAVLALIPGLWSRFSASLAFRLDNGHESPRL  
KKALLLKAGSALEVRLAEVPGSGYRLFPEPFLGLSSSSVSDASMVSAGFVAGTSLAAGVG  
VLPFFQAEAGTILALSADLALQAGLTARLKMEADSGRRFVALYSTCEFGIHIPADRLCER  
LPGSLYAGVRISLSPAQEKTN AVIVSMQL\*

>SPSA8\_v1\_70015|ID:41145096|fusA| Elongation factor G 1 [Spirochaetes Bin 1 SA-8]  
MELREIRNIGIMAHIDAGKTTTTERILYYS GKTYKIGEVDDGEATMDWMDQE QERGITI  
SAATTFWRNHQINIIDTPGHVDFTAEVERSLRVL DGAVAVFCAVGGVEPQSETVWHQAD  
RYNVPRIAYVNKMDRLGADFEAVLEDMRLKLGAAPIPVNYP IGRENSFEGVVDLLTMEEI  
RWNEDGHEMTRSPIAETRRHEARVYRETLVDALSAHSDVITEL YLNGEEIPAQIIKAELR

KACIARALIPVLCGASRRNMGVQPLLLDAVIDYLPSPDEVEPAKAFHLKKEENVEVACNTS  
GYPLGLVFKVQWDREAGPLCYVRMYSGLNNASVVYNVTKKKRERITRLLRMHANKSEPL  
DSVSAGDIAVLVGLKNAQTGDTIGTEGWVPLEKMHFPETVISVAIEPKTMGDRDKLKET  
LDILSREDPTFMTRENEETGQLISGMGELHLDVLVTRVIRDFKVQAKVGNPQVITYRETI  
TATVSHTEEFKVKVFAKENTAKLTIEAAPLPRGTGNIYRKAVRAPTVPEEIFEAIERGIQ  
SAFASGIQFGYPSVDIGITLTDIEYSELSTSTPFAFEACANMAYDAACRAAGPVLLPEIMK  
VDILSPKDFVGEVMSLVSQRGGLIHGSDSKAGSEVIHAEAPLSTMFGFTTSLRSVSQGRA  
SFSMEFSHFQPKR\*

>SPSA8\_v1\_70016|ID:41145097| Peptidase U32 [Spirochaetes Bin 1 SA-8]

MTIYTKRETFNNSGRKFLPNDEICRLAILKPEAKTFYKDSVKRVELLAPAGSPEALDAA  
LGEGADAVYLGRLSFNARMRSSNFAFNQFEAAVQVCHDKLKKIYVTVNTVFEEREADRM  
QLLEYLDRIKPDGIIVQDLGVVVKMVRDHPGLALHASTQMNVAASSRGTNFLSRNGFKRAV  
LARELTLEEIRTIRQNTSLELEVVFVHGALCVSASGLCLFSSYLGGKSANRGTCTQACRRL  
YESETGKGYFFSPDDLQLIDYIPDLIEAGIESFKIEGRMKSAEYVGTVVSAYRHLIDSWQ  
IDKERALVKAKALLQSDFARAKTSYFMPGGNPDYIHPDQAGGTGIHLGRIRDIRVIDDER  
WALMASFDGLSEGDSIRIHRSDSGRITAKIKGVKQPINGMLLKIEGDWRQNDVYLIQT  
ASMARRYKPVLPNNLDRFRSFPRLAPKQFVMPVSSKKNLDPGFYTLIGKVADLHAV  
LAVRPQKAMILFDRLNAESMRKNEQTLPYKRERLVLWLDPYLPESDASWLEPELDYWISR  
GVKQIVVNNLGHFSMLRGKDVLIAGPWLAFNTWSSAFLFDQGVKYLIPPMEISKQDLQ  
KLVD AFHPGVVLPVFSYPSLFRIRGDLTARYDSKRFRMDRDGLTYTLSGRRDYNVLPDK  
PFSILDRTPFLRKEGFTKFILDLSNADSTRGLFRDIAKA ADEAKILPNASRFNWKDGFIN  
EENASKA\*

>SPSA8\_v1\_70017|ID:41145098| putative HTH-type transcriptional repressor AllR [Spirochaetes Bin 1 SA-8]

MSESAGKALDILFYMAKAGDEVSLARMSKETGINKATALRYLSVLESRGVVERRPGGWSL  
GLSLFELGSRVPVREL VVEKVRPILDRLARESGESSNLA CLAGDSAIYLDRAEANRSLRM  
RSAPGDRPLCYCTGVGKAILS QLPEERIRAILGPGPLPKINDSTL TEPEDVIREAQRARE  
LGYGVDREEYEIGLTCYAMPLQLPGSDFAGAISISGPSARMRNPEAKERFLNLLKEAKEE  
ALKAISPYDYDQNTTAPSVSSISSII\*

>SPSA8\_v1\_70018|ID:41145099| Single-stranded DNA-binding protein [Spirochaetes Bin 1 SA-8]

MNPLNSILVEGNLVRDPITKTLASGNQFCGFTLATNRSYKLNGETRETEVS YFDVETWSR  
LATA CSQYLKKGRGV RVVGR LKQDRWVDQEGKPRTKIKIVAEHVEFKSDKQKDKEPVKPG  
SLSDQIMDEIEETEGAVVF\*

>SPSA8\_v1\_70019|ID:41145100|purB| Adenylosuccinate lyase [Spirochaetes Bin 1 SA-8]

MNDFSGYLS PYSWRYGTPQMRRIWSEEGRRL WRSIWVSLARVESEFGLVDGKLADELEA  
HAGDIDLARSFEIEEIRHDLMAEVKTFAEQCPNAGGIIHLGATSMDIEDNADVLRMRES  
LRLVIEKLKGLLGIFADTIDRTAGLPIMAFTHIQPAEPTTFGYRCAMWAQDLLTNLEDLE  
SVLASLRGKGFKGAVGTAASYSELIGPERVEQFEERLAEELCIQFFPIATQTYTRLQDYR  
VVAALAGLAASLHKMAFDLRILQSPVGEVSEPFGRQVGVSSAMPFKRNPIDAEKIDSLA  
RLLSSMPQVAWSNASL SLLERTLDDSANRRITLPE SFLIADELLKTA AKIVSGMVLNTEA  
MERTFAVYAPFACTERIMMALAKKGGDRQVLHEKLREHALSAWAAIKSGQDNPLFGMILE  
DAFFSELAPRSELEXLMDVRTYVGNAPERARKFAQKIKDXVRDT\*

>SPSA8\_v1\_70020|ID:41145101|purL| Phosphoribosylformylglycinamide synthase 2 [Spirochaetes Bin 1 SA-8]

MLRNAQENSLKKSXLFGILDEDADWAVIMPMEIGQNIFRFTIKELQPGGKSSAVIVRNA  
QRIGLDKVC AVHESDMYFVRGNIAPEELDLLGRFLFSDPVLTAFSVEQLPCKAEPDVQYI  
EVGYHVGVTD SVAEEIIRAARELGVTGVDA AATGKRYTVSCRNGTSLKQEELLRLAEKVL  
VNPVVQRY SIGPITPAFPDESAPRIPAE LFNHEMNDEELSALNLRQRSALSMEELHAVR  
DYFRAEKRPCTDAEYEMIAQTWSEHCIHKTFAKIRVEGGDADGLPPVVDNILLTYIKSA  
TDAISAPWVVS AFKDNAGILAFDEEHEISFKVETHNHPSAIEPFGGANTGVGGVIRDILG  
VSAKPIAVTDVLCFGLDDRKDFFLANQSLQTLHIQDGVIAGVQDYGNKMGIPTVNGGIHN  
HEHYTSNPLVYCGCAGIAPKGSHP SAQKIGDRIFVIGGKTGRDGIRGATFSSMTMNNSTF  
EHAGSSVQIGAPLVEKKVTEIILAARDKKLYSAITDCGAGGLSSAVGEMTS DLGGEIEIA  
KVPLKYAGLAPWEIWLSEAQERMVLAIPAENTTEFIELCESNDVEYCDIGYFSGTGRLVV  
RYYGDVIIDLDCSFLHKGIPQRHLIARPAIRTA VNDEAAILKKALLE DAYRSEGNIFFEN  
LLISVLKHHAVHSKEHAIRLYDHEVQGATVIGPFAGYSQTGPSDAAVLAPAEVKSGKZIA

VSNGFNPRYGEADSYNAAFSAFDEAFRNAVACGADPERIAVIDNFCWGDPKNPENMYTLL  
RSAKACRDAALLYQSPFVSGKDSFNNEFVDEKGNRRAIPPSLLISAIGLVPDVHKA VSAD  
LKETGNSIYLVGEFRPELSASVAAQLLDANFSEQTADGKTHVDFSAGTGPSPSRKAQVY  
RALHRAMQNSLIASCHDISDGGLLTAIAEVCIAGERGASISLEKLLKLSGSAWDIALTLFG  
ETNGSLVVEVRREKEEDFLKEMGENECVKIGTVGKLNQNLDLRITSQALLSFSLDAMKTA  
FHVQSIAGGVR\*

>SPSA8\_v1\_70021|ID:41145102|purQ| Phosphoribosylformylglycinamide synthase 1 [Spirochaetes Bin 1 SA-8]  
MKPKALILHVAGINRDNDVCQALSLAGADPHIVHVNQLKTEKCLFANFQMLIIPGGFSYG  
DALGAGKLFALDIASYFKEEASAFIASGKPMGICNGFQTLVKSGLLPGGESGTQKSCTL  
THNEHNRFECRWVSLSLPKSSCIWTGGITRIVRCPVAHGEGRFLTADNAV LQNLNRGQV  
ALTYVQSNGAPAEKGYPDNPNNGSIFDIAGICNEAGNILGLMPHPENNIFEGRNGSDGSGL  
LIFENGVRYAAQI\*

>SPSA8\_v1\_70022|ID:41145103|purC| Phosphoribosylaminoimidazole-succinocarboxamide synthase [Spirochaetes  
Bin 1 SA-8]  
MVNREVVETALHQPFGKLMSSKSEVLSGKVRDWYSLPGKQRLLVTTDRLSAFDRNLGFIP  
WKGQVLNQLSAWWNEKTQDIVPNHLISMPDPNASLVHEVAPIPVEVIVRGYITGVTTETAL  
WYRYSLGERHIYGYDFPEGLVKNQKLPKPIVTPPTTKGGATGHDERLTCSEIVEKGIVEPG  
LWKQIEDTAFALFERGRELAEKAGLILVDTKYEFGLDDEGRLLLIDEIHTPDSSRFWKKS  
SYEDRLSKDLEPESFDKEFIRLEYAKMGYRGEIGEIPQMPDELWVTASMFYQSAFEMLTGN  
TFLPGEYPVEPRLMKNLQKAGIIV\*

>SPSA8\_v1\_70023|ID:41145104|purE| N5-carboxyaminoimidazole ribonucleotide mutase [Spirochaetes Bin 1 SA-8]  
MKSCKAILMGRSDMPHAEKIAEKLD RFGVPYVFRIGSAHKVPLYVLDIIHEAENESQD  
IVFITIAGLSNALSGMVDWATRFPVIACPPPPAAAFAGSDIFSSLQMPPGVAPAVILDPLN  
AALFTAKILSFSSPDIALAIRSYREEQQAKLLNDDAETRQKRNGSN\*

>SPSA8\_v1\_70024|ID:41145105|purF| Amidophosphoribosyltransferase [Spirochaetes Bin 1 SA-8]  
MTMLRPDRNAMGPIDFYTGPREECGIIAVYDPQSEAARTAFYGLFALQHRGQEAAGIASY  
NERMVHLKKDIGLVSQVFSEEDIRKLPGR LVIGHNRYSTTGIPSAKNAQPFVVTGKYGPI  
GIAHNGNIVNAQELRRELLDKGIGLTSTSDTELMMLSLGLASGKTWVQRIRNAIKKWIGA  
FSFVLLTEEGFYAVRDSWGFRLPSYGKTADSAFVAASETCALSTLGCSEYFEIPAGAILF  
CSNSGEFEVIDSGLKKKPSACLFEYIYFSRPSIWNGLSIHLVRRKFGEELAKVAPVDAD  
MVIPVPDSSISAAIGYAHESRIPYGEAFVKNRYIGRTFIEPTTTLRQKGVRMKNVNLKDS  
VEGKRVIDDSIVRGNTIKPLVTLLRNAGAREVHVRVASPPVKYPCRMGVDMGESEDLV  
ANRLDAQELARWSGAVSLAYLPLESIRNVLGIYSACCTACFSGDYPFKVGTTNNSKNQFEP

\*

>SPSA8\_v1\_70025|ID:41145106| phosphoribosylglycinamide synthetase phosphoribosylamine-glycine ligase (modular  
protein) [Spirochaetes Bin 1 SA-8]

MKILLGSGAREHALAWKIKISPKCDMLWCAPGNAGTAEIGTNIALDIANPAEVAEFVEK  
EQINLVVVGPELPLAAGVADTLSALPADSRPLVFGPVKAAALMETSKEYAKKFMRAHGIP  
TAEFRVFSSEDKALSFIAPWPFVIKASGLASGKGVFLPENTEEAKHIIKNLLDDKALG  
DAGSEIVIEERLFGEEVSLGFCGDGYTVLPMPLAQDHRLLLEGDCGPNTGGMGAIALGTQ  
DSL RQAQEWAGKFLLPVIAGLQEDSVHYHGVLYAGLILTSQGPKVLEYNCRFGDPETQAI  
LPLDSDLIELLTACAEGRLAEAKPKWKDEASASVVLASSDYAQDTKAFCD SIIRDFGGT  
EKNAVIFYAGARREGDVIRAHQGRILCASGWDVSLSLALEKAYARISRIEIAQGRYRKDI  
GFNRQFLHNLEKKEGAAASSLAPSSEAYRSAGVDIDAGDRAVALMSAAVKATYTPHVLG  
IGAFGGVIDAEAFSAVENPVLVASTDGVGTVKLAAMRGSYTTIGQDIVNHCIDDILVQG  
AKPLFFLDYFAASSLKPEMVAQAVSGMAEACKASGCVLIGGETAEMPGVYEKGEFDIAGT  
IVGVADK GKLLPAGNLKAGDMLIGLPSGLHTNGFSLARKIFSEQELFAPFADTGELLID  
ILLKPHRSYLRYLEKILFAAENPIKALAHITGGGFEGNVARILPDSLSAVINTSRWPIPP  
VFAAIAEHGNIAAEEMYRVFNMGVGMVAVISPEQFEAVRASIDLDCWNIGHLQPGNGKVI  
MQYGKAGRR\*

>SPSA8\_v1\_70026|ID:41145107| Phosphoribosylglycinamide formyltransferase [Spirochaetes Bin 1 SA-8]  
MKLVVLVSGNGSNLQAVLDAIKDGRLASTVELVISNKQDAFALERARQNRIPFLAFPSRS  
SLPRETYDSILARTALAFEPDYILLGWMKILTSVFIDNFPGR IINLHPALPGTFPGTHA  
IERAW EAYQAGTIHVSGVMVHYVPDEGVDSGPVIGKKEIAMTGIKTFEEFERITHETEHE

LIVATLQKLEKNWNKLCGKEIQA\*

>SPSA8\_v1\_70027|ID:41145108|purH| fused IMP cyclohydrolase ; phosphoribosylaminoimidazolecarboxamide formyltransferase [Spirochaetes Bin 1 SA-8]

MKYALISVYEKTGLEKLAKTLTGHGWNILASGGTAKLLSAAGIRVREVSDYTKSPEILAG  
RVKTLHPAIHGGILARGTEEDRLQLENLGFEMIDL VVVNLYPFEKTVAIPDVSETEAIEQ  
IDIGGVALLRAAAKNHDRVTVVSDPADYQVIIDIVEAGKEIPAEKFKKFKALAFRQTASY  
DTAISDWFAKQVGGESSRTFTLKGYHAKTLRYGENPHQHAEEYSAEPGAGIFGGTVLQ GK  
ELSYNNILDLDAAWQAVNRFERPAVVIVKHLSPCGIAQAPLSAAGNAAENAPDDASLVSA  
LAQAIACDPVSAFGGVIAVNREFSGECARNLGSFLVECIAPAFSEAAIEILGKKKNLRL  
VVPGACKPQNEIRTVLGGFLRQDIDDGDPENATWTVVTKRTPAEETAALGFAWKACISV  
KSNAILVANTNATVGIGGGQPNRVDSVRIAVTRAGERARGSVLASDAFFPPFDSVEEAAK  
AGITAIQPGGSIRDQEAAGADSAGIAMVVTGVRHFRH\*

>SPSA8\_v1\_70028|ID:41145109|guaB| IMP dehydrogenase [Spirochaetes Bin 1 SA-8]

MNLQSEKLFESGMALTFDDVLVPSYSELLPSQVDIRTLAKDIVLNIPLISAAMDTVTE  
SSLAIALARMGGMGIIHRNMSPEKQATEVDRVKRSESGMILDPVCLEKNASLAEARELMQ  
KFKISGIPIVQGEKLVGILTNRDIRFCKDDDFKKPVSEFMTSDKLITARVGTTLDEAR  
DILQRYRIEKLPLTDEAGCLKGLITVKDISKKADYPNAALDKLGRLLVGAAVGVGADLEK  
RIQLLSSRNVDVAVVIDTAHGHSRGVIEAIRRIKAVVPGPLVIAGNVVTAEGVRALAQAGA  
DAAKIGVGAGSICTRIISGAGMPQLSAIYECAKEAAKFDIPVIADGGIKYSGDMVKALV  
AGADCIMLGSLLAGLEESPGELVLYNGRQYKTYRGMGSLGALQGYGKDRYATGLGGGEKL  
VPEGVEGMVVPYKGLSDFVFLIGGLRSGCGYAGARTLQDLKQKTGLVRISNAGLLESH  
HSITITREAPNYQRGDF\*

>SPSA8\_v1\_70029|ID:41145110| putative tolQ-type transport protein [Spirochaetes Bin 1 SA-8]

MIDFIIQGGAVLWVIMALSIVACAIIRLLYLRRISVDEDKFLRIKASLLEGHYNEAL  
AICDQNLSPFSTLLKVGIENRHQPEQTQRDILKDAAALEAPKLERGLSALGTISHISPLL  
GLLGTVTGTMKAFGVLGKFGAVSDPAALASGVSEALITTVGGIVVAVPVVIFYNYFVTRV  
NLILTKLENQVNTLVLLINAANNGNGGKGTSEEA\*

>SPSA8\_v1\_70030|ID:41145111| conserved protein of unknown function [Spirochaetes Bin 1 SA-8]

MNSRRLSPKISIDMTPLIDVILQLIIFMITTTFRAPGISLDLPGSSSTAQSVSSALQV  
VVLSEDEIYVDKTRTDLKNLSATLRQRVAGSDGTHIRAVLEGRAGASYQLIISVLDAFRF  
NGIENVGLITRKEKMVQ\*

>SPSA8\_v1\_70031|ID:41145112| conserved protein of unknown function [Spirochaetes Bin 1 SA-8]

MKDLAKPSASFLEREDRKRRLTAYGLTILLYALVFGFGIFIGILSPKEQAFSNTVVINL  
AGPEKPEIGLGSVAPSEKGEKKLEENPSPKPAVESPKAETPKTKTETAKSVEKTVQPP  
KQPANPSTSMVSDSTEPLSTAKTPGSSSTVQSETAPAEPWVPGQRGPGSRVSSSNSAVN  
VPGQGEVPSQGNVQISKKEKGNSSSETSLGASQGTVGHNIYVPVFYSLPLPRTVPAIYI  
ESIPDLVQPPNTILYTAQARKKAFSNFYVREGDLFRLKNDVPLDYREQLWQILEDAGYDV  
MNADYKQDKNLMPVIGFTVTKDNQMKGVEILQSSGDPEIDRSVVYGFKRAAFWNKTGET  
VPGRFYRF\*

>SPSA8\_v1\_70032|ID:41145113| Response regulator containing a CheY-like receiver domain and an HD-GYP domain [Spirochaetes Bin 1 SA-8]

MKAPALRSILIVDDDPAIQKVLISGLGRLGYHIHVAQNGREALNYLES GDYDPDCILLDI  
RMPVMTGREALPKIREIKPITPVIMLTAFNDLATGLDAMKNGAFDYLVKPSRLEHISETI  
EKALKYRDVVAEKAEQDRKNEAYRLSLEKKMQSKAIELNDTYMMLKAANMQTVRALAETI  
EAKDQYTQGHICERVRKLAVKIAAALKLPAEKIEPLEIAALLHDIGKIGIPERILNKQ GAL  
DPDEVDIIMHPIIGAQILSTVEFFLPAINAVRHHHERWDGNGYPDGVAGEDIDQLARII  
TLADTFDAMAMSQPYRKALPLDGVLRIEIQEESGKQFDPEAVRVFFSERLYQDYEDAAPRQ  
AE\*

>SPSA8\_v1\_70033|ID:41145114| putative Phospholipid methyltransferase protein [Spirochaetes Bin 1 SA-8]

MVLIFIIILAGFLLIAADQLQIRKKSILSRNVRRAGYLLVLASFVLIALLSSTLDTRPSLL  
FLGTAIFSGILLWSVFFEFDIERKKHDIPENGLVTTGSYRFCRHPGFWWFALFSLSLGF  
LRGISAYFFTILLMNLMLLLIFIQDRYIFPKVFQGYDEYRKQVPFLVPRIPKAMRKP\*

>SPSA8\_v1\_70034|ID:41145115| putative Multi-sensor signal transduction histidine kinase [Spirochaetes Bin 1 SA-8]

MILDASTVIPALTFCIYVPFIIFGLSSKKEKINFSFLIYMGFMALWSFGSFMHANTKLL

TPLFWNKVMLVGLLGGPIAILGLMIYLSETNKRRYRIFMYVGYGIYFLFLYLNLKGTIVT  
DAGFDAEGFFYKLGNGAVIAYSLSYFYLIISIALIAREIAVNENKFKRKTLLRLVAGGAFI  
MLAGVAVNLYGPLGKYPIDLAAATINAAIIFFAVYKYRLVHYSSVVLKILLTIFVSLLSG  
LIFLFIPIFHLDRRVPFQQLTISLILGIFSSVVLSPLRTTTTLEFLERLYGGKTFAYY  
QNLRNFSASLTAIVELEKLGTLTVERIMATFNLEWAVMVFVNDYGARNFKLNAAQNLPFGN  
TIISGYDESIIILQRGDELIRKYLQHSGGNKKTADYITVPQDTITINLERNGSRESVNASL  
ILPLRFKERLNGFIVLGPRTDKDYYNQFDLEILQLLGDQCSVALENAITFERLRQQQKRL  
QHINNELVISRNKLEAFFDGITTPISIQDINYNIVAANYAARRYFEKSAEEIIGSKCYKV  
FFDRDRPCLEMAQDCLHTKLPFTAERQDAKGIITFSLNFYPIPVPKDSQLIFLEFFQDI  
TKQKTLQEELIQSEKLAGIGTLVSGIAHEINNPLGGILGTADLILSEAEEGTAIREYAQD  
IIRYAQNAADVIRDLMTYSRKNRSSEMIVNVLENSLKMAMRGIDFRSVTVRKNYNQT  
DMIQANAIEIQVLLNLIVNAVQAMNGDGVSLDVKQEDSDIIVVQDTGKGIEKENIDK  
VFNPFFTTKEPGVGTGLGLSIAHYHISKAGGRILLDSEAGKGTFTIILPAANQERNRIR  
FIHAKETRQLEDSSFFIQRKVLVGEKGYQEETIRRKEDESAPHVVA YKGLQPVGTICILHMS  
TDEGGPIEANFDLSGFKDEYPYAEIDRLAVVREERGSIIPIFSIMTLAYLYGRARGAKKI  
FLDVFSDENKLIKMYEKLGFKIIGSYNKPLSCTVMMMDHTSQYETEASRMEHFVKPFFSR  
LVPKIDFTGEDRDHVMRVINAIAKAKFPKDKDQSEES\*

>SPSA8\_v1\_70035|ID:41145116| Oxidoreductase domain protein [Spirochaetes Bin 1 SA-8]  
MEKIRFGLYGYGKVAQLHATALASLDNAQLVAVCGRNLQKAHDFACRWNIAARSSCEEMV  
QLDKVDAVLITTPHPLHAEHAMEALRAGCHVIIKPMALRVQDCDAMIELAKDRGLTSLV  
ISQRRLYPATQRIKKAIDDGLLGTPLMGQITMLGWRDKAYYESDPWRGSWAMEGGGVLVN  
QAPHQLDLLSWYLGVAEVAGFWANVNHPIEYVDDSAVAVVRFKSGALASIFVSNSQEPG  
IYAKVHIHGSSGASAGVQTDGGAMFIAGRSGVLEPPVNDLWTIPGQQHILEQWKQEDSAF  
FSTIDATWYFFARQIEDFSSAIMHGKPMVSAEESREAVKILEGIYRSHASGSIIRF\*

>SPSA8\_v1\_70036|ID:41145117| Alcohol dehydrogenase GroES domain protein [Spirochaetes Bin 1 SA-8]  
MKALVLTAPSTFEYVDYDPPEIRNPDDVLIRIRAAICGSDVHGMDGSTGRRKPPVIMGH  
EAAGEIAAVGSGVTGFKPGDRVTFDSTEYCGECEFCRRGEVNLCSNRKVLGVSCDEYRRD  
GAFAEFLVVPQRILYHIPESLDFTGAALAEPSAVAHAHAATPLKMGDTIAVVGSLIGL  
LLIQILRAFSPGLIVAFDPDRERLRAAEKAGATAGFDPSNPAAELEAALRLTGIRSFDRVF  
EAVGATAPIQTALAAVRKGG SITLIGNVSPMIQLPLQSVVTRQISLLGSCATAGEYPLVL  
DLLASGKIDYASVVSAAAPLSEGAGWFRRLHAREKGLLKVVLP\*

>SPSA8\_v1\_70037|ID:41145118| PfkB domain protein [Spirochaetes Bin 1 SA-8]  
MKTLNISESPGARDFAALGALVTRLDPGLIPFSFADTYQVHVS GGFEFNVAANLARCFRKN  
TAVVSAMVDYPIGEKVESEVRKMGVDGIYRRFKHDGVRGP NIAQVWSDQGKGV RPPVVFY  
NRANAAAQLKPGDFDWD SIFSRGIRWFHSGGIFSALSSTPEL VIEGMKAARKAGAIVS  
FDLNYRAKLWAANGSSTA AHEVLGRIVDEV D VLLGNEEDLQMGLGLKGPDIHSASKLDPE  
AFYRTIEEVSQRWPNIKAVATTLRDVKSTNRHLWSAVLWLG GDRYLAPTMELDVLD R VGG  
GDGFAAGLIYGFLEGMSPQEALNIGWAHGALLTTFPGDTTMASLEQVIALSKGGSARIQR

\*  
>SPSA8\_v1\_80001|ID:41145119| protein of unknown function [Spirochaetes Bin 1 SA-8]  
LRRKQTMVDSFVTIAGIAMFYV VAGEGVPIVYIHGNTGSSRWFSRVMX

>SPSA8\_v1\_80002|ID:41145120| putative hydrolase [Spirochaetes Bin 1 SA-8]  
MPTAEIQGV SFYYELSGQGN ETIVFLNGIAMSVAHWAPYVQAFQGEYRCLCHDMRGQTLS  
EKPEGEYSLDLHAQDLAELMDMLGIARAHLVGTSYGAEVAMAFVRFPEKCLSLTLIDGV  
SETDPLLEAIVDSWIQA AEKDARLFYRTILPWNYS PGYIGANRELLAKREASVTNLPREW  
FEGFNRLCA AFLKINLTESLSAIQCPTLIMVGEKDILKPYKFSKII EQRIKGSQLIILPG  
AGHA AVLEEPALVQLHLRNFLAAR\*

>SPSA8\_v1\_80003|ID:41145121|braG| High-affinity branched-chain amino acid transport ATP-binding protein BraG [Spirochaetes Bin 1 SA-8]  
MLKIQGLECGYGRMKVIDGVSLEIGNESVGLFGPNGAGKTTLINAIMGMNKPWKGSIELD  
GTNIVGLETHVMARRGVALVPQERELFPGMSVEDNLR LGAVYIPHA KDAIQEQMESMFSL  
FPILKERRKQLAGTMSGGQQRMVAIARALMSKPKLLILDEPSLGLQPSIVSEVFDVLKEL  
KKTVSILVTEQN VRESLKSIDRGYVLENGKIVLEDTAKGLETNPHVLKSYLGL\*

>SPSA8\_v1\_80004|ID:41145122| Branched-chain amino acid transport ATP-binding protein LivG [Spirochaetes Bin 1



SA-8]

MTKLETANLTRRFMGLVAVNNVSFKLEQGEILGIIGPNGAGKTTFINLVSGIIMPSEGTI  
TFNGRDITYMPAHERARLGIARTYQLIHPLENLNLVENVMIGSIFAKGSSLKEARRKAER  
LCEEMGLTNLERDTAKLTILEIKKMEIARALANEPEVLFLDEVMAGLNSDET KDLIATVK  
KIAAERKLA VGVVEHVMGVIRELTNRVIVLES GELIAEGPYEEVSKNPRVIEAYLGGAA\*

>SPSA8\_v1\_80005|ID:41145123| Branched-chain amino acid transport system permease protein LivM [Spirochaetes Bin 1 SA-8]

VNRNLSRIIALSAGAIAXLPLFAGDYPLQVARNVMMYMXLAIXWXMLLRSGQISFGIXG  
LFLGLGAYAGILGMIRGGMPAWLSIPFAAFVAGFAAFLIGFMILRLRAMYFSIVTLALGEI  
FRIIHNLDHFTGGPEGIVIQQGVIFGGSSSKLYWLTGGLAVAIAASYWFEHSKIHFAL  
TAIRNNETSAKSSGIDIFKWLLVAFVVTSAIQGLLGGIFVQSYGFATPETVFSADFTLLP  
LAMALLGGVYSTVGPVIFGAILLGLAAEWLKLKIPYGHLLVYGIHLLVILFMPNGLLGR  
RQTTGKRAGRTA\*

>SPSA8\_v1\_80006|ID:41145124| High-affinity branched-chain amino acid transport system permease protein LivH [Spirochaetes Bin 1 SA-8]

MMAPKQRTAILAGLAVIGTIALAWKPTVVIYGLQAAGLYASIAIPMGLILGIVHIVNLA  
HGEIMMVAAAYATYFVCKALGMDPLLAIPMALVMAAFGWVLFQLTIKRALKAPELNQLIL  
TFGIAIALS QSVNLLFTS QTYKLQLDYVSSSIDIGELSFGTWSFVFAVAAILFAYGLKYF  
LTKTTTGKAAALAVGQNPRGAAIVGIDVYRIYALVFGLAIAMVGGMGALFLTKSAIFPSVG  
GPFTMKSFLIAMAGVGNIPGILGASLLLGISENILRAFRGTRAWADIVFFVLIIVVIMS  
RSLKGRKS\*

>SPSA8\_v1\_80007|ID:41145125| Leucine-, isoleucine-, valine-, threonine-, and alanine-binding protein [Spirochaetes Bin 1 SA-8]

MKRLMTVLAVLLLLGGSVFAQNTIKIGGIWTLADITGKQGSAAAQLAVEEINKAGGINGK  
MLELIVVDDEGKADKAAA AVEKLATVDKVDVFGGMGSGAELGKIPAFKKYGVVMSTGA  
AGSATVEKALGPSPEDFYFHLHPWDYNQGASYAEGWD AIQKQYPXIQIKKIFLAEYEGA  
FGKSSWDATKVLFGSDKRYTIDGAPFKSALFGGGDYTAVLES AKAFKPD LFLWAGYDADA  
LPLEQSKAMKFTPGIYLGAPPGWPIGFGSSKLSRNVMLYGMWSPAMNENNAASAKFYKA  
YVAKFKEEPATYFAPLAYS AIIYLADGIKAAGTTETAPLVKALEATKYASPLGELITFKP  
SNIKHQGITRQKILQWQNGFQEVIWPF EAATAEPVYPPFAWK\*

>SPSA8\_v1\_80008|ID:41145126|fabG| 3-oxoacyl-[acyl-carrier-protein] reductase FabG [Spirochaetes Bin 1 SA-8]

MERMKDKICVVTGGARGIGRTIVDRFSDEGAAMVFALDVNAAGFADLEASGRKNVRPTVV  
NVTDTAAIQAFVDAVMAEFGRIDVLVNNAGITRDALIQMSDEDWDAVINVNLTGVFKMT  
RAIAPHMMNQGVGAI VSISSIVGLDGNIGQS NYEATKGAVVTMTKGWAKEFARKGAKVRV  
NSVSPGYTRTPMIETVPEKVLEPIIAKTPLGRLAMPIDIANAVLFLASEEA FITGQVLR  
VDGGLVL\*

>SPSA8\_v1\_80009|ID:41145127| 3-oxoacyl-(Acyl-carrier-protein) synthase III [Spirochaetes Bin 1 SA-8]

MHVG IAGIGIYIPQRMTAGDLAVMTGVPEDIIAQKFGVKS KPVAGPEDSTADMGYKAAL  
KAVEEAKIQAEDIDLVIWYGAQH KDYPCWLAGLNVANRLGAVKAW SFDMEAMCGSMMAAL  
DLAKSLMLTRDDLETVLLVSGYRNNDLIDLTPNQTRFMMDIGSGGSACVLRKNLGKNVVL  
ASAFRGDGS LSEMCVVPVLGSKKWPPSAEDATHPYFVVPDEEAFKKKLGEVTMPNFYAVI  
RESMKKSGFEEKDIGYLAILHFKKSAHDAVLAELGLKPEQSTYLDEYGHIGQNDQLLSIT  
LGLAADKIHDGSVVVLVGAGLGFVWAATTVRWGPWNE\*

>SPSA8\_v1\_80010|ID:41145128| putative Transcriptional regulator [Spirochaetes Bin 1 SA-8]

MENSSSKERLILSSIDLFSRKWFGTVSVAEICRNAGLSNGLFYKYFKDKEAIFKEILDLV  
IAKISSAVAQVAGESALERLTSFIDIYSFSQENTALVKVFREGQYRYFEYKRLKTVYE  
RALFFIFKAEPDIADYLFGLGGLRFASIRAAFHQIPVDLKRLLAILKNGIFHGLPIDEKK  
VFSTSITPLPLQIMPDGRERLLIEGKTLFGEKGYFD TNIEITDKAGLSTGAFYTYFDSK  
ESFYSELIHRV GREVRHFITINLPPGLNSLERELRGLWLFIVYLSIDRTCYGIVREAEFV  
LPAEVKIYYDAFAEGYRKHQDPGIAALDPTGIEFLLGVAHYLGIEVIFDESPANARNVIL  
QLGSYYQTGFSGKFEL\*

>SPSA8\_v1\_80011|ID:41145129| 3-oxoacyl-[acyl-carrier-protein] synthase, KASIII [Spirochaetes Bin 1 SA-8]

MASVRIAGTGLYAPGPAISNEK LKALTGIEFDSA KHEEKLGIKRRRIARLSGLDETTADF  
AEKAARQALANAQIDANDVGMFIVATDTPEYISPATAILLQGR LQGAERESRAFDVGASC



QDSSAPLVVLNMPHNPTGALISAEFDSIIQVCRRHGAILFMDEVYRLLEYDEKDRLPV  
CEAYENGISLSVLSKAWGLAGLRIGWLATKRRDLLDKVAAIKDYNSICASAPSEQLALLA  
VGNTATIVGRNRAICAENRVLFSQFFKAHEELFSWIPPKAGSIAFPSLKAELKKTGIPSG  
NSAAISADLSDALAEQDAELFARVLLAEIGVLLLPGVHYAFDKAFFRIGLGRRSVPVSL  
IFDAWLREKGY\*

>SPSA8\_v1\_80020|ID:41145138| putative Amidohydrolase 2 [Spirochaetes Bin 1 SA-8]  
MKNRMFFDIHCHAHTLAHPSFLALIQTIRNRLEAVYSQLTAPEYLVSSFFHRGGEKLRN  
MLSVMENEPGDIFMMEDDLAGLYLPDFGQEKARAASKDRLLPLISQNKLLKGGKTYDRL  
AICPLLIDFNTSGEYKPDITYNRYPRKSMKAQIVDVLGIREYRKQRPDGLLEVYPFLGV  
NPSRYSLPELERFLAEWFPKPKMLKAPAEPEAQMTNPNGLRQSVCMQTQRRSQFADMIDFQS  
EGNFGQDNYFAGIKLYPPLGFDPWPSEPSEREKAEALYQFCETNQIPITTHCDDGGFRVI  
QLEKAWTYTAPERYTEVLLRFPNLRINFAHFGYLHNQIKRINDQHEWRNRILKFMLEYPN  
VYSDFSDGVPYQFYQELLEMLANLSESDRKVVEQRVMFGSDFMVNLLKVNSYLEYFTIF  
EESPLDSALKHKFGSENPARFLFGV\*

>SPSA8\_v1\_80021|ID:41145139| Permease of the drug/metabolite transporter (DMT) superfamily [Spirochaetes Bin 1 SA-8]  
MSKSLSLLAGTGYAAIFGFSFLVTKGALAVLDPMELIFVRFLVAAILMTILAAATGIIKIR  
YSGKKIGILAGMVLFPVLYFIFETYGVRESATSTAGIILGALPAIVALLGLVFLKERIT  
KIQLGLGLSVLGVVIVVALGAQSQTGAEGTLRGAILLIGSMLSAAFFNIFSRKASRTFT  
DYERTFAMMWSGALAFGIIVLVRYMANGGSLPPPSAGAQNVLSSLPARALSVWFAIFYL  
GVLSSVIAFFLINFSLTRLKASQSAVFANLITVITVVAGVAVRGEKFDIVQGVGAVVILL  
GIFLANGKNEGKSAD\*

>SPSA8\_v1\_80022|ID:41145140| protein of unknown function [Spirochaetes Bin 1 SA-8]  
MTDTSIEAFWADFERQTGEPVLCRTMGQMFSTPKDRGDWGLMVLSPTSFRFRKTPGENWF  
ASIFKASAPVPRQOEEDMIIPYTAMLEIKPPKKTILDILFGSPFISFLIYTKGDETMQ  
VHFAVDPKSDFLARLKELSKL\*

>SPSA8\_v1\_80023|ID:41145141| HAD-superfamily hydrolase, subfamily IA, variant 3 [Spirochaetes Bin 1 SA-8]  
VLNNDSKAFEAVLFDMDGVLVDSEELIALAAQMMFKAKYSVEMPRDAFLPYVGAGEDRYL  
GGPAAERGIEIDVPSAKALTYEYYGQLASTHIRVLAGAREYLSACKKSGMKIALASAADK  
TKVLINLKVLGVEEGFFDAFVTGSEVEHKKPSPDIYLLAARKTG VQVDRCLVVEDAVNGI  
IAGVRAGCRCLGITSSFSESELKAAGALWCAKDLASAPKPWELTTSIAL\*

>SPSA8\_v1\_80024|ID:41145142| conserved protein of unknown function [Spirochaetes Bin 1 SA-8]  
MQALSQTFSLPFFTEKAILNLMTDFYALINASSLPYFEYGVSAIDRYKGLKPQEPPIFFA  
VHGSLVDVARLFDSEYYPGLPYADAMIGRASIGFEARIKCIEDPGQAEKHASPFMEFRWN  
PRTGHFLDPASMYQNVKQDELVLSPADSENALFETAILLSRFPCQEDQAAGNKPASQGLA  
TCKMGKTNLPVSVPEVFQKDLLELILQGKYASQALDFLERSGFVKKFWPLLAALTDVDHA  
KDCHPEGGGWSHTMEALSQRKTFDRAISLAAILLHDIGKPLSTQSEGRKFDRHAEIGADLA  
ARFLRSLHFEEKLIEDVRFMIRWHMMVAALPRLPLASVRSIVFDKRFPDLLELFRCDFES  
TFKGPDVYYASCAA YRQIMKNRKNPYRSDTGEKLRVGAPLGTKRQL\*

>SPSA8\_v1\_80025|ID:41145143| putative Metal dependent phosphohydrolase [Spirochaetes Bin 1 SA-8]  
MKRALSKMAFFLIILFGLSFLVLPVIRHKEQELKLSIRTAMSSVISMQATALEDGYFSW  
SELQNLIKGRQMAAAVQLLKPIYEA YPFVQNTVQPGVPPSESEFEIEGLNQSIYLA YSIK  
DDFGYEALPGWKA VVILDAQKIINAIHPAGDLVIDPLHGTVLVYGIRVRFSTPLFSLIDY  
LVAAFASIALGYPLWMYLKKRTVYFYETKGLSIIFLFEQTEKSSANHSRRVAALALFIG  
KKLGFRGAKLRNLYTAALLHDIGKISIPSDILTKNGPLTIEEIYIKTHPLISSRILKNF  
KELSHLEKTVLYHHERMDGSGYPEGLKGNEIPLDSRIIAVLDVFEALIGDRPYREPVDVL  
SAFETLRMSLDQEIVEVLARHYHEFTNFQSPKWAVAYDPISVV\*

>SPSA8\_v1\_80026|ID:41145144| protein of unknown function [Spirochaetes Bin 1 SA-8]  
LKTVYRAMFQDDALVLASMLKSAGIEAEVFADRMLDVNPLFSTDINGVSIVVPDEQEQDA  
MAIVNDYKKNTSFSGMKA\*

>SPSA8\_v1\_80027|ID:41145145| Peptidase M24 [Spirochaetes Bin 1 SA-8]  
MFHQSTYRTRAKLLAQLKDRNVETGFIVLLANGESPRNYPDNCYEFQDSTWLYFIGLR  
EPGMAALXNIA XGETTLFGTELTVHDMVWTGPRPSLEELAAALGGISQTASIDKLAEHIGQ  
AARYGRIHYLKPVRVDTAQSF SRFLGMPLEQVIGIGASLELTKAVIALREVKEDEEIGELD

AASAVSAEMHQA VLSLHPGWRAWEAASLARYVAESRGFSLSFPSIATTHGEILHNHDYG  
AVCEDGQLFLLDAGAESQNGYAGDLTTTFFVGRQFTARQKEIYTILLAMMEASIKKTGPG  
VRFLDVHLAAAQALAQGLVDLGLYEGERDEIVALGAHALLFPHGVGHMIGLDVHDMENLG  
EDLVGYDQPRSSQFGLRSLRLAKTLKPGMAHTIEPGIYFIPGLFELWRSEKKFKHLIRY  
DRLAAWIGAGGMRIEDWLVTDGARRLGPLLDKIGIGAIEAQRRVMH\*

>SPSA8\_v1\_80028|ID:41145146| protein of unknown function [Spirochaetes Bin 1 SA-8]

MDYVRECFVLNLKIRRKIMRMSQENLAEAAEVSSGYIANIETGRNFPSTQVILKLAKALN  
VDHWNLFVDPRKEDIGFSKDEVFSIIDNFKNYLMGELPKRYPSKVSDSGQKS\*

>SPSA8\_v1\_80029|ID:41145147| exported protein of unknown function [Spirochaetes Bin 1 SA-8]

MPFFLLAAVFYISIIFPTQAQTGQAAQAPVAVPVALESGIPYTETLPNGLDIILLPQNGA  
EKAGFSLIFRGGTDAQTTKTAGLFLKLEHLIFRGVAASPGEPEPAGVLESLSAQDLHGGV  
QQDRFFFSFTTRPEQATQALDPLL YLFSGLRLESFAADPKALSDAKDMSLLFINQEFSDP  
SAIYENSIARKIFVSAPWRFDIGGPDYIIDSVTEDILKDHAKTWLLPNNACLIVAGNFD  
EAIRKEIPKRFSTWAKGPNPLAKPLPVFPKPGITRPTFMVLPDPSISEGKALIEMRYP  
DASSTRYQSALLWSVMADNPEGRLAKAIKGLPASSNPQNLSTRYIAAPFASWLSVSAEI  
AIAAKSNLPDILTFKELVRSTEMYAMKTNSAYFSVSEYEKAKSEVKEQRMAAFSDPAEA  
LLELGGYWILGGLSFIRDMPNRIEKVTSKDIMAFADYFMKNLEVLAVRLSPEDYAKQKK  
SFDSYGFEQMTAQKAFWWR\*

>SPSA8\_v1\_80030|ID:41145148| (P)ppGpp synthetase I, SpoT/RelA [Spirochaetes Bin 1 SA-8]

MHSEERVRKFLQSFQNVFGSAELAKAEQALAFQTRHGQEHRSAGEAAWEHNLRVAALLI  
EMGLDEDSVLAGLVHDTIDKSEDAQKKTAVTPDQELTERFLETATIVAGVSRSSVRA  
KVKTVQGAESMRKMLFALTGDIXVILVKLADKLD SMRTLKWLPEERQKLIAAECLDIFAP  
LADRLGISWMKDELEDLSLKALNREAFDQIKEIVSAKKDEREKFLARVSSAIRSLAEAE  
IQIEISSRAKHFIYSIQKMRKKAKEADELYDLLGIRILCATETECYTLLGIVHKLWKPIE  
GRFKDYAMPKANGYQSLHTTVMSYEGQLLEIQIRTRLMHAVA EYGVASHWLYKRGTTNE  
KPVLEDLPVNLKQWNEFLSQGAGYLEDIKRELLKDSIFVFTPQGDVIELPAGSTAIDF  
AFAIHTDVGACHL GARADGSIPLDAELKNTQVVEILTSPLAKPNLNWLKLAHTSKARSK  
IRALLVQSGQVLAIEKSIVVSKHPEKEKSEDRSKEQAAEEAKLHGSRQQEAPAFEPGKTE  
LEFRSYRTGQELRSDKAGLSIGGARNMMIRIAGCCRPVTGDAIVGYVSRGRGITIHRADC  
RSIAAVADFEERKIEVRWEDGSSAIARFRVTTKKVPGIFSEIESAVRKYSGRRLREGKLG  
RGDGLLSGFFTMEADNRESLKKVSKSLRGLPSIISLEEEFDTK\*

>SPSA8\_v1\_80031|ID:41145149|prnC| Release factor glutamine methyltransferase [Spirochaetes Bin 1 SA-8]

VNIMSTYRDILSAVSATFTDSETPFLDACL LLAHNLGLSRESLLTRLSESAPPLPASFYE  
AVRRRSEGESIAYILGKKEFFGREFIVDSRVLVPRPDTEILVESALECGDVIEQEHGRL  
SVHDACTGSGAVAVSIASERPGWTVSASDISEAALEVARANAVKLLGKPLLLTVSNLLGA  
VRGTFGIITANPPYVPSCETDALLRQGWKEPRLALDGGLDGLVLIPELISQAFRLLEPGG  
FLLVETDSLQVPDVCAMFEKMGFVAIFVKRDLAGRDRVTGGRKPLA\*

>SPSA8\_v1\_80032|ID:41145150|prfA| peptide chain release factor RF-1 [Spirochaetes Bin 1 SA-8]

VTDRIAQLQERLAELDAQIASPEIFKDQARYREVMKERSKVSAILSIDEKYQQIATELSD  
AEAMARHETDSELKAMAE EISVLKEKAEACRQELNLLAPKDEMADKSVIMEIRAGTGG  
EEAALFAADLFRMYSRFADIKGWKVEVMSESATELGGFKEIVCSIDGEGVYEQWKWESGV  
HRVQRVPATENSGRIHTSAVTVAVLPEMEETEIEIRQEDLRIDVMRSGGPGGQSVNTTDS  
AVRITHLPSGIVVHCQDEKSQIKNKAKAMRILRRLYEIEEAKMQAERSQERKSQVGS  
RSEIRTYNFPQNLTDHRIDLTYKLDLIMEGDLEELVSALVKHFRQLALAGSLQ\*

>SPSA8\_v1\_80033|ID:41145151| putative tRNA-dihydrouridine synthase [Spirochaetes Bin 1 SA-8]

MLTIQRGSLLLAPMVGITNRAFRTLIAEIGAPDYFFTEMASAEAFCARAQYEEVYTDPLP  
EPSRTSVQFYARSSMAQACRRIKERPEHLR PAGIDINLACSAPHIRRQGGGSAWSTDA  
EQTSELVAAARANWAGMLSAKIRTGPDDNYDRLLRFAAALASAGLDFLTLHPRTDSQKFK  
GTPNWDLIGRLSCDLSIPVINGDIKDAISLRLRTVQNPYAFMIGRQAVREPWFRTLK  
ILENKDSPDTRDIQVSFDRLAIACRFIDL VQNLLPEKWKLETLRFFGYFTESFSFAHHA  
NVLLANSNDNPMRSKEILERYFEQVPQDRYVVIE\*

>SPSA8\_v1\_80034|ID:41145152|rpsP| 30S ribosomal subunit protein S16 [Spirochaetes Bin 1 SA-8]

VSVKIRLKKFGAKARPYRIVIMDARSARDSKTIEEVGLYHPIETEDKQIRIDEERVKYW  
LSKGAQPTDTRVRSLLNKNIRLG\*

>SPSA8\_v1\_80035|ID:41145153| conserved protein of unknown function [Spirochaetes Bin 1 SA-8]  
 VERDLVEYIVKSLVDEPDAVDIKVIEGEKSTILELKVAEADIGKVIGKNRIARAIRIL  
 SACASAQSKRVILEILD\*

>SPSA8\_v1\_80036|ID:41145154|rimM| Ribosome maturation factor RimM [Spirochaetes Bin 1 SA-8]  
 MVANPEERTLA VARLGSPRGLHG YLKVH SFSGEYGHILKLKEALLYPPQSASQQSSKPRK  
 LKVRGFEEGDWGIAIAFIGFESPETARELVGMEIVVPREQACPLRDNEWYIGDLVGM DLV  
 YQGTVMATVASVLDGGPDPLLEAQLPEDGRTVLV PFRNEFIGKVDTSAGSMELLVDWILS  
 \*

>SPSA8\_v1\_80037|ID:41145155|trmD| tRNA (guanine-1-)-methyltransferase [Spirochaetes Bin 1 SA-8]  
 MKFTVLSLFPEILEGYFSASIMKRAV GKGIIQYSLVNIRDFAHDKHHKCDDEVFGGGAGM  
 LMKPEPLDKALESAGSPGVRTIYVTPSGRLLNQAMAQDLAREEQLVILCGRYEGVDQR II  
 DTRVTDEISIGDYVLSSGEVAAMVLIDAVYRLHPGVISGESLTEESFSGGLLEYPQYTRP  
 AVYATMQVPDVLLSGNHAQIARWRLKASLAKTIA YRPELLARTDLPEAVGRLLKELIDEG  
 GLNERTAVHTG\*

>SPSA8\_v1\_80038|ID:41145156|rpL5| 50S ribosomal subunit protein L19 [Spirochaetes Bin 1 SA-8]  
 MNALQSIQAEQIKSELPVFNVDGTVRVSFKIVEGKTERIQAYEGLVIAIKNAGIGKTFTV  
 RKNSYGVGVERVFPLNSPRVENVEVLRGK VRRAKLYYIRTKIGKKS VKELIVSKKENA  
 N\*

>SPSA8\_v1\_80039|ID:41145157| conserved protein of unknown function [Spirochaetes Bin 1 SA-8]  
 MASRFLTTL YGRQGEAVFADRLARDGWQILARNFRRRTGEIDIIAERN GIVAFIEVKTWR  
 YLDCADLSDVINA IKIHRIIETSKIFLKMNRQYNWK RIRYDVLLAPDGT AQHFEGAFDE  
 TQ\*

>SPSA8\_v1\_80040|ID:41145158| protein of unknown function [Spirochaetes Bin 1 SA-8]  
 MKHGKTVSNDPLSWAGSDKTDVQRYHDL MVDNSGQDVYKILNLKHKLEDNTYVEDALSRI  
 ANFLANEANKKGKA\*

>SPSA8\_v1\_80041|ID:41145159| conserved protein of unknown function [Spirochaetes Bin 1 SA-8]  
 MNPNRSAHDNAGQGKNYPHKKPSPE SGRER GKQAQQNRRPVAPGLETEKPKMSPPKTCAIC  
 QKPIFDLAGAIADKESGEPVHFDCAIERISKAESLGPNEKVVYIGAGNF AVVEYKNGADG  
 AFTVKRRFHW EKEGEKQIWRKEISSYISRI\*

>SPSA8\_v1\_80042|ID:41145160|yfeU| putative PTS component; possibly regulatory [Spirochaetes Bin 1 SA-8]  
 MDISRIDDALEHAVTESRNIKSMNIDSLSEAEILRLINDEDKTVPF AVEKALDSIALAVQ  
 DIVAAFRDGGRLVYIGAGTSGRLGVLDASECPPTFGVPYGMVIGI IAGGDDALRKSIEGA  
 EDNPEEGRKALEAIHFSSNDVLIGITASGSAPYVLGALQYAREIGAKTGAISCNRESKTF  
 LLADHKILVEVGPEVITGSTRMKAGTAQKLVLNMLTTAS MIRFGKVYGNLMVDLTPVNRK  
 LVERSKRLIRQATGCSRDEAEQAFLASGKKPKVAILMILLEIGADHAQSLLARGSGRISD  
 AMRLFNAEKA EKAQAQGG\*

>SPSA8\_v1\_80043|ID:41145161| Transcriptional regulator, RpiR family [Spirochaetes Bin 1 SA-8]  
 MSESEVKQGAMDKIRSMLPEMSEAERKIALFVLSEPTKSLHFN VVELSRHSASSSAAVVR  
 FCKRIGVDGFNEFKLWLA KDVFQDREKFLPDLDES KTPAERAIHEVIDYARKSLQDLS  
 RTLDPAQLDRAAQKIRSASATMLFGIGASGIVAADFQ QKLLRIGLTTSTFTYDSHAQITTS  
 CSLKPTDTALIVSYSGETELMIEIAKQVKQRKASLITL TMEGANS LRQYADIALLPASE  
 RIYRRGAETSRLSQLTVLDILYRIIVSYDVEAAIEAIERSMEATHRKRKXTGXFPNIXXQ  
 RFLLIENPQKGR TSGILMEPSACWKFSIMAMIAREQAMA VPLSM\*

>SPSA8\_v1\_80044|ID:41145162|serS| Serine--tRNA ligase [Spirochaetes Bin 1 SA-8]  
 LQESSAPV IILPMLDYKFIKENLEAVKQ NIAERYMQADADR VVSLYDERNTLLRELEEQR  
 KNRNENALSMKGLDPETRTAKIEEGRQLKEKIAALEARLAEVETQLQAEGMRIPNIAHP  
 EAPRGKEDKDNLEIKRVGAPT VFNFA PKDHVQLGQELDLIDFDTATRVSGTKFY YLKNEA  
 VLLEMALVRFAL EKLRSKGFALFETPDIARTEILEGIGFNPRGSESNVY TIEGEDTCLIG  
 TAEITLGGYHSGSILEKSALPLKLAGVSHCFRREAGAAGQFSKGLYRVHQFTK VEMFVYT  
 LPEDSDAMHEQLRLIEE EIFSMDMGIPFRVVD TCTGDLGAPAYRKWDLEAWMPGRNNGEWG  
 EVTSTSNCTDFQARRLN VKFKDDD GKNKYVHMLNGT AIACSR AIIAIMENFQQADGSIKI  
 PDVLVPFCGFSEIRKR\*

>SPSA8\_v1\_80045|ID:41145163| Long-chain-fatty-acid--CoA ligase [Spirochaetes Bin 1 SA-8]  
 MANTIPQMFIEKAESQPDVNVQYSKNEK GDFIPTTYRELLNNIC SFAAGLNAVGLKRGDN

IGLISDNRKEWLTADLAILGLGAADVPRGCDATLQEISYILSWSECR LAILENEKQLEKV  
LEVQKSLPALKT VILFDPPSGALKEKAESSGLTVLEYS AVFEKGA ALEKANPGLYRAEAR  
KGKRDDLATLIYTS GTTGD PKGVMLSHGNFLHQTEYLPSIIGVRS GELFLSVLPVWHSFE  
RVVQYIILQAGAGIAYSKPIGSILLADMQAVQPHWFTSVPRIWESVKDGVYKSIRQSGTV  
KQILFKV FVGIGESYAYFRNHLGRIPAFAPRSR VLEIAASIIPFLLLFPLWKLGDILVF  
KKVKAKL GKRFIAGVSGGGALPASVDRFFDALGV LILEGYGLTETAPVLGVRLKNHPVLG  
TVGPIHKGT EVRIVGEHGEILGPGKKGV IQVRGPQV MLGYYKRPDLTEKIMTKDGLDGTG  
DLGMLTVHGEIRITGRAKDTIVLRGGENIEPVPIEQKLC ESEYISQAVVLGQDEKYLAAL  
IVPTQERIEYAEENNIPFADYESLILQPEIHEL LDFEISELVSSKNGFKPFERIFKFDV  
LAEPFQPGRELSAKQELKRHAIN TLYHQRIKALFKN\*

>SPSA8\_v1\_80046|ID:41145164| protein of unknown function [Spirochaetes Bin 1 SA-8]  
MRSEGTDL EIRYFQENVDP EIAERFIIRLPEGAIAISNSADDMIHIDCELHGTTSTIPSW  
KPIVRRHESILV LGSEASADV TASIIEKVPVRIKDLE VHSLKGEIDIRDCPVNVLAMTE  
LGGIHHGAHSVEASTVQGGITLINC GSISVRTIDGSIRCSKINGIINAETQGGDIQISR  
VKGNNVALTQTGDISVLRPEGRIRLITRTGDVELELGPVFGGGEVNTYDGDVNLML EQAN  
IEFRAETLSGHISSPDETIAPGSEPRRCAYKIGQGT KRLHVKSVLGDIELE\*

>SPSA8\_v1\_80047|ID:41145165| membrane protein of unknown function [Spirochaetes Bin 1 SA-8]  
MKDEKIQKDLQEIADCLRDLRTAIKTN SPL LHIVASSRLYPILGLVFGVLASGYSIMMH  
ILTTASDTAEPGFQPASLTWIFLVFLVCGGVV KVFYTNRLIRNLKNASFGALLKTIYGG  
RISGFLLSAALTITAAIVFLVRMNHPWYIVPVA AIFTSFVVQVMNFLIELAEYSIFGFSV  
LIFGLVSLFVIDTWPWLCVALTFGGSFLVFGIAGLIRASGITGKK\*

>SPSA8\_v1\_80048|ID:41145166| DNA-binding helix-turn-helix protein (fragment) [Spirochaetes Bin 1 SA-8]  
MKSRTGTTASLPDPDRIIHERARLRILVYLASSLSAKVGFTELKDSLGMTAGNLSTQLX

>SPSA8\_v1\_90001|ID:41145167| protein of unknown function [Spirochaetes Bin 1 SA-8]  
LDSVELVFD DDAIDAIAEK AISQKTGARGLR SIVEKLM TDIMYEVP GAKGAIKVRVTRDA  
VEGREPCRIEPNKKTA\*

>SPSA8\_v1\_90002|ID:41145168| [tbpA] thiamin transporter subunit ; periplasmic-binding component of ABC superfamily [Spirochaetes Bin 1 SA-8]

MCKVLF LQGGRKKPFSFTACQLFLMTVMLAVPIMLTISCQAQAKTKSLTVW TYDSFVSEW  
GPGGSLAKLYKEKTGTDVTFVSKGDG GALLAALLAEGNASQADAAIGLDNNLADKALSSG  
LFSPLNLKNLASVDKNLLIDDKNRLIPYDYGTFAIHWDSKTSITPPKSLEDLTRPEYRKS  
LILMDPRTSTPGLGFLAWTEAVYKDAWQDYWTR LAPSVLAMTPGWD TG YGLFTKGEAPLV  
ISYSTSPAYHKAYENTERYKALAFSDGHPMQVEFAGILTSSKQKKEAEKFLDFLLSPEAQ  
AILPETQWMPANMTVNLPDSFSVIPQGITT IKAEVKNLEKDPEIAAA ILSGQK\*

>SPSA8\_v1\_90003|ID:41145169| putative ABC-type transporter, integral membrane subunit [Spirochaetes Bin 1 SA-8]

MDEKNRQSASSFLTAFVMLLTLIPVFSFIVFALS KSVKSGTAGFSVFITANQILTKANLR  
ALT FSLQQAALSTISAVAIGLPGAYFVAR YRFRTRRLFFSLAAV PFCMPPLL VILSFILY  
FGKSGFLAAAFSRAGLPFLKSSSFLYSMTGLVFIHAFY NFPVIVQTVGALWSQLPDSREE  
AARTLGAGRAKAFLVGTLPYLLPSLFQAASLIFLFCFFSFTIVLVFGGLSGSTLEVEIYR  
ATRFSGDYSRALFLGFIQTAMAMLVVSIFVHFDNKT TQIAKGFGAGRTRLEPRGQAQIAL  
FLYQLMIAMFFIGPLVALVLEGFTVRPSLAGNTHFGITNFTK LFRDGGKPLL PALLNSLI  
IGSVVAAIATLIGLGISASDHYGRKTSIW TALPLALSPAIVALGWATLLQSSSIAAIIA  
GQSVMAWPFVSRNLGASFKSIDRNKYEAARVLGARRIQAFWRVDM PMLLPSIASAGAF AF  
SIALGDANIPILGXGKYETLPLLLYRLVSA YRFSEACAVGIVLAIVAGIAFY LKEKTSE  
LL\*

>SPSA8\_v1\_90004|ID:41145170| putative Polyamine ABC transporter, ATP-binding protein [Spirochaetes Bin 1 SA-8]

VSYCNIESLR FVRRGF AVNVSF DLEK GKTA VILGPSGSGKTTLLRCIAGLEHPASGGIFL  
NGKNIISLPPEKRNIGFVFQDFALFDHLTGRQNI AFGLKLR SIPAGEIERIIDRLARKFQ  
IAHLMDRK PHTMSGGEKQRLAFARSLAIQPD LLLLDEPLSSLDAPLRKELRS FIREKLSS  
EGLTAIHVTHDVQEAFELADIVFLMDKGVIRHAGTPAALHETPPDAWTARFLGLGNLIPA  
VPLEIR DATADVMTAIGTVRQVNKPQGRSPSDSHHSEDLFLFIPDSAFIHDRGVSAAR  
HDLQLHGK VSKNILEGSSMRAEVM IETDSKEKAIKLELPVSSGSLAAGDIVEIGINPDRC  
IVLPEQSIDYE\*

>SPSA8\_v1\_90005|ID:41145171| [aroK] Shikimate kinase [Spirochaetes Bin 1 SA-8]

MSPIISLIGMMGSGKSMTGRSLACILECPYVDLDTEIEKTAHCDIPRIFAQHGEAGFRDI  
ESAALADILANNRQRLVLSCGGIILRKENRTMLRARSFIVWLDVPIHELQRRLTAERSN  
RPLIAEGDLKTRIKKLSAQRGSLYEETAHFRLIWNNEGMNAEDCAKLIHNQWIAQAEQCSD  
RD\*

>SPSA8\_v1\_90006|ID:41145172| Membrane dipeptidase [Spirochaetes Bin 1 SA-8]

MHETQLTDSCAVIDAHCDTLLEIAGIGYYESERGTPPRDFRNNEHAHLDPKLLAGHVRC  
QFMALFCDDAYLDSAYEHTLALIDIFKKLCSGSGGRFFPVLSAKDLDCAVPGDKVGTLLS  
IEGAEALGPNAEHLPELYSRGIRAVGLTWNRSNAFARGVRGEGEGGLTEAGHRLVEQLEA  
MQLIIDASHLSDEAFSDLAQQARRPFIASHSNARAVYNHPRNLSDTQIRAIADSGGAVGV  
VFVFPNFISGESGVSYFDRLIDHINHIVKVGGIACAALGSDFDGFKDEPEKRVLSDASEYP  
KLEALLQRGYTTSDVEKIAGGNWERVIREILQ\*

>SPSA8\_v1\_90007|ID:41145173|uvrB| excinulease of nucleotide excision repair, DNA damage recognition component [Spirochaetes Bin 1 SA-8]

MKPFKVVAPFEPAGDQGTAAALVEAARSGKRYMTLKGVTGSGKTFTMAKVIEALQQPTL  
VISHNKTLSAQLYREFKGFPPENAVEYFVSYDYQPEAYVPSKDLYIEKDSSINDEIDR  
MRLAATAALMERRDVIIIVATVSCIYGLGSPDLYKEMRIYIDRGKVIDLDTVKNRNLINLQY  
ERNDMVLDRGRFRVRGDILEIYPAYAEDA YRIELEFDTVRRIRKIDPLTGKAGDDLDEAI  
IYPAKHVMPEDMVQRAVQRIKDELEMQYAYFLDNNKPLEAERIKSRTEYDIEMLEEMGY  
CSGIENYSAPLSGRKPGERPGVLLDYFPKDFITFIDESHVTLPOIGAMYAGDRSRKTSLV  
DYGFRLLPCALDNRPLTIDEFETIVDKVIYVSATPSPKELERSAVIAEQLIRPTGLIDPEI  
QVMPTEGQMEDIYQVRERSQKGERSLIITLTKKMAEELTEYLTGLGLKVRYIHSEVETI  
ERVEILKQLREGLFDVLVGINLLREGIDLPEVSFIAILDADKIGFLRSATSLIQIIGRAA  
RNAAGLVVMYADRESEAMKTAIETNRRRAIQLAYNREHGITPVTIKKTVQDILERHHEE  
KVDITLGEIGLLKSHSLLVPEQKALLKALEARMLEHAKNLEFEEAALIRDEIQRIKDG  
SDA\*

>SPSA8\_v1\_90008|ID:41145174| Peptidase S1 and S6 chymotrypsin/Hap [Spirochaetes Bin 1 SA-8]

MKLYSKKAVLSIAIVSFLSAAALIAVSSLIIVRSIGIWSRSIDTGPSPTTSITQPVSGQI  
TETALSDSGYTLDEMENISYERYNESVVNITTEVMALNWFLDPVPQSGSGSGSIIDEK  
GYVLTNNHVVKDAYKLYVNLADGSRHEATVVGTDQPNDLAVIKFSPLAGTRLKPIPGTS  
KNLKVGQKVLAINPFGRLERTLTKGIISGLGRPIQKDSSTILQNMIQTDASINPGNSGGP  
LLNARGEMIGINTMIYSPSGGSVIGIFAIPVDTAVRIVPELIKEGKVRRGWIDMDAFILV  
PDLVEYMRKAGYPVPVEKGLLVSQVRSGSNAEKAGLRGGTKAVRYGSSVFNIGGDIITSV  
DNHEIASVADLYTALEDNKPGEKVWVEFYRGNQKNSVQITL TERTQTK\*

>SPSA8\_v1\_90009|ID:41145175| protein of unknown function [Spirochaetes Bin 1 SA-8]

MLVVGLGPVSIDLLLQIPLRTIINDDTAMSAAAERKDTIAMLRTAFFE\*

>SPSA8\_v1\_90010|ID:41145176| Cob(I)yrinic acid a,c-diamide adenosyltransferase [Spirochaetes Bin 1 SA-8]

MSIITRTGDEGETGLWSGERISKDDIRVEAYGTIDELSSALGMARHLCFQDEVLYAIDEI  
QRLLFRAAGELASVGIPFDRPITEKDEERIAEKTLSEERVVLTGFVIPGMTAGSAALDL  
ARTIARRAERRVITLARREAVSPDLTRFLNRLSDYIFMLARLEEASAGKLTFA\*

>SPSA8\_v1\_90011|ID:41145177| Putative arginyl-tRNA--protein transferase (modular protein) [Spirochaetes Bin 1 SA-8]

MLIFNKILSKPLLLQAGTGKIFHDVHSLDILICMDRKISRLLTACPYLPDRKACMLFMET  
AWDEADYFVYENLLVQGWRRSGHLLYCYQCPGCNRCLPIRIPINRFVPSKLSRIIRKNR  
DISVRLQNASYSDERFRLYEKYVTARHFESAARDADLEHRLAFLDMTAGLKAQIIEYRDQ  
AGILLAEGFADILPEGISSVYFAFAPDSGWRSLGRFSVHAEIQIARQLQKSFYYLGFVWP  
GSGKMDYKADFAPFELAVDDQKSQTADFSRDPLMNLHEKAWRTFSSKEEALS WLEAAGYL  
DR\*

>SPSA8\_v1\_90012|ID:41145178| putative PpiC-type peptidyl-prolyl cis-trans isomerase [Spirochaetes Bin 1 SA-8]

MASQINKSETQETKKTEEKKAPKRGVKNPFVYGGTIVILITIAFVFISSSGFSSGS  
APSGFSWKGKPIITYEADSYFANQVAQINDYLRQQGMSDQNFQYYAYQVWQMAFQSTAVRT  
ALIDIVKQSGFRVTEKGLDEAVATNAAYQQDGKFSVEKFNKTPLATKLSIRNTTKEDLFV  
RRYYEDIYTIAPSTAEIAFVASMAKPQRSIEYTAISLADYPDEEAAAWGAKNADLFKTVG  
LSRITITTSEADAKKVLAVQVKENKLSFEDA AKSHKDSYADKGGDAGAVLFYVFENDFTN  
KDDAKKIASLPGKEVSDVYKLGDKVWVAFKINSELVPADFTKKA VLDEVKAYLYEKERTG

LESWAIKANSLLDLTNAFAAFAASAKKAKLALKKAGPFIINIGSPTFYAYGQQIPLLQGP  
YANNDPALDGAEQDEAFMTELFAPKPKGVSKPVVLGDSVVVFSVTDDTPASDDDETALVKF  
AFPYFHQQVVDNQTRSTILKSKNFKDEFNKMFFKIYSTQASAK\*

>SPSA8\_v1\_90013|ID:41145179|lepA| GTP-binding membrane protein [Spirochaetes Bin 1 SA-8]  
MHEKELIRNFCIIAHIDHKGKSTLADRFIEKAHIIDQRKMQNQMLDNMDIERERGITIKSQ  
AVTLPYTARDGKTYTLNLVDTPGHVDFSVEVSRAISSCEGAILVVDATQGVVVAQTLNMY  
MALEHNLEILPVINKIDMPAADVEGVRAQIDKDLGLDGSSALAVSAKMGIGIDELFEAIV  
ERIPSPEGSPDEPLQALIFDSHYDAYRGVVIHVRVFAGKLEKGMKIRFMSSQAVHEVEDV  
GLFKIIPSTDMLSAGEVGFCAIGIKTVRDVVRVGDVTVTGDDNPCLAPLPGFKEIKPVVFS  
SIYPIDSADYDELKDSLEKLTLDASLVFEKDNSLALGFGFRCGFLGLLHLEVQERLER  
EFGQAIIMTSPSVRYKLHLHNGETIFIDNPSEYPDPSRIESAEOPYIKAEIITPVYIGN  
LITLCVNRGEQKSFHLDKRVELVFEMPLAEVLFDFYDKLKSTSRGYASFDYEVIGYR  
PTELAKLDFLINGEPVDALSMLVYKPGAYERARKVCERLQRNIPRQQFKIAIQGAIGATI  
IARETVNPVRKDVLAICYGGDITRKRKLEKQKEGKKRMKMGVGNVELGQDAFLAVLRTDD  
DEER\*

>SPSA8\_v1\_90014|ID:41145180| putative Major facilitator superfamily protein [Spirochaetes Bin 1 SA-8]  
LFLATLEGVTNLVYSTCTMIALKHLPRNASASIKLEPLWALFGPLVTYFMPLYQKELGLS  
EVQMGIIINSIAIATGFVYALASPITNKLGRRYTSIIFDTVAWSIAMLVWAFSRFAWFL  
IAQILNSVVRIVVSWNLLITEDATDQERAAIYGWIYVIGAFGGGLSTFLGGIIIQKFLV  
PSMRIIFILGSISMSAMFVLRFIWTRETAPGQYLKEKLEKKEPFVKLVLQQIPSARDALKD  
GNFLMTGIYILASAVLSIDFFRILYLAEKKLIPSWTISMIPATGAISCMAVFFIVLPRR  
KHIPHIKSLKSGFLLSFLFQTAFLIPVRSALAILVSGLQTSYFLIQTFRDTVFMNTV  
RSDQKSELFSLVQALMLFFTIPMGWLAGWLFEFNNLPPFILAILYGLGFLSTNLEKQN  
SAQETGSSV\*

>SPSA8\_v1\_90015|ID:41145181| Glutaredoxin [Spirochaetes Bin 1 SA-8]  
MNLIDLPHYITKEGFRNDHSIVVYALSTCGFCKRALAFDQHGFSYKYIHVDQIPILETKTE  
VKKILKERFNENVAFPFAVIDEDKHLVGFIEPDWVLTGVTGE\*

>SPSA8\_v1\_90016|ID:41145182| Ferredoxin thioredoxin reductase beta chain [Spirochaetes Bin 1 SA-8]  
MNQKTLTDQTRLFTRMVAEKQGWTLNPDTEFYESLVEGLTANYNRYGYLPCPCRDSDGSRE  
VDKDAICPCVWSRKDIPEFGHCYCALYLSKEFSESRAPCRAIADRRYEA\*

>SPSA8\_v1\_90017|ID:41145183| conserved protein of unknown function [Spirochaetes Bin 1 SA-8]  
MIYLDWAATSKPDEGILSESLAETLQIFGNPSSQHELGRKARELLESSRLRMLAAINNVQ  
GKASTKSQPGYPKLIFTASGTEADQIPLLSLLNKNKISKLAEEKANRPHLVISAIEHAAI  
HSQTLQLQNLGFEVSFIRPDPEGFIQPKAVTKAIRPSTVLIAVMLVNNETGAVQDIPGIG  
RAIEESSIALRMKAPWFHVDCVQALGKIPFSLPQNVSSAAFSAHKIGGPKGIGALLLFKE  
LIPLAQGGGQESGYRSGTENLAGIDAFSRCVQKSLAGLNKNLEHVRQLEQLLSGLSAIP  
GCQIIPASRRPGDSRFSPWIISASFPGLSGEVFQRALSEQGICVSTGSACASSHGAKAKG  
RRILDAMGMTPEASFCISIRISLGSDSAEDDEILTFIETAHRLYSSLKT\*

>SPSA8\_v1\_90018|ID:41145184| thiI| putative tRNA sulfurtransferase [Spirochaetes Bin 1 SA-8]  
MSAIFLIKTGEVLLKLGNGREFVHQMKSQIRNRLGAIPHKIEEYPGRFFLEVSDENAPVA  
EFVLSHCPGVNGYAPVTVCAKTTEAILAASVVAANHEAEISGKRTFKVETRSDKSFPLD  
SYSMSSLAGETILSRVQGSQVDVHSPDYVITIEIRERAYVYGPTLPGPRGLPSGVSGKI  
LLSGGIDSPVAGYMMARRGLALEAAFYHTYPYTSIEAQKKVEALAVKIAAFCGGIRLWV  
VPFTDVQMKIKLANPEATTIMLRSAMMEAAHALALKVGASCIITGESLGQVASQTAENM  
RVTQAPTTFPVLRPLIGTDKEDTIAIARKIGTFDISILPYEDCCVLFSPHEPILKPNFRE  
AVNAYKEIDLSAIEAASVKNAEALRFYYSVDVLKEQFGN\*

>SPSA8\_v1\_90019|ID:41145185| RelA/SpoT domain protein [Spirochaetes Bin 1 SA-8]  
MTREKSVLVIPDKSKLAEIYAASVQDYEKALS VFVEDLSRLLNQAGLRPTIKSRVKQFES  
YYSKRLRLLKNAWMESGIASPVNDMLAVRVVCPFLGLDVAENAIKEAFTIEEIERKGAE  
RSFREFGYESIHVLVKIPEGLEPLCKHLDRAVIEVQLRTELQEA WAEVEHEL VYKAEFTP  
FDEPMKRKLAALNANLTLSDIIFQEILEYQKRLNTELA KRRQAFYHKIEEVSEPELAGGE  
KKTAQKELEEETQRANQSSSEKFELENFKSFGMDGLLLAALEAHNNADFDKAEQIYSEII  
LKKPEKEILAVVYKHRGMAYFAQSRYEALRDFSACLILDPECYKALYYRGVVKSILEDH  
SSAIDDFSSALKIHPYHFFSRYRRALS YWKLGD SAQALADCEIALRIE PDNALARHLLNQ



IKDRISQTD\*F\*

>SPSA8\_v1\_90020|ID:41145186| protein of unknown function [Spirochaetes Bin 1 SA-8]  
MPMQTKQHAHGALHLPILLAAGVIAAYGLTLSSSSCTLYFPDQHATNLVRERRVLSPIGN  
PEERSRRVLDELALGPMNHKLQPLLPNGAQIRLVMQRSGTL YVDIELANLADSKIRFPLI  
KEAIEKSLKTSVPGSGSIKLFINGIETSK\*

>SPSA8\_v1\_90021|ID:41145187| Cell wall hydrolase/autolysin [Spirochaetes Bin 1 SA-8]  
MFLRNRLNLLALVIVLFIPLPFVFGQQADAAASAQDLQTSLSVQLFYDPLLKTGYFVREG  
KYL SFATDQPYLALDFKQIAKVSAPYNKEGVLMFPPDTRKVIENYYSAMQKETDGKYSVA  
AILIDPGHGGKDTGAI AEF GSTRLLEKNLTLEVSKRVVELLSERYPNRKILT TREGDSYP  
TLDQRVEMANSIPLKPSQAVIYVSIHANASFNKNAKGFEVWYLNPEYRRTVVD AVTVQEK  
GKDIAPILNAMLEEEFTTESIILARKVYDRLGSMIGDASPGRGIRAEWFVVRNAKMPSI  
LIEMGFITHPEEGLLLADSGYLKRIADAIYNGIVDFIDHFER\*

>SPSA8\_v1\_90022|ID:41145188|nrdJ| Vitamin B12-dependent ribonucleotide reductase [Spirochaetes Bin 1 SA-8]  
MKFERRFTKKGKGPYAGITWEKRISERPNPGLV FHMDSVIVPSFWSQIATDIIAQKYF  
RKAGIPADKARAW EAFIPESQRQLAGDSPIPGSEHDARQVFHRLAYTWCAWGRKAGYFDS  
EEDEKAFYDELLYMLAHQMAAPNSPQWFNTGLHSVYDIEGPAQGHFYVDPETNEVVKQS  
AYERPQPHACFILDIQDDL VNEGGIMDLVTREARLFKYGSGTGSNFSKVRARNENLSGGG  
VSSGLLSFLKIADRSASAIKSGGTTRRAAKMVILDADHPDIEQYINWKTEEEYKVA CLAA  
GSAALNRYAKDMKLAIDSFGPDRESAFSLAENKPLRAA VRGAIKAGIPAAWIHQVLTLYY  
QSGELITTPQYDTGWESEAYNTVSGQSSNNSVRVTNAFMNAVLSGDGDWDLIARTTGKKMS  
SVKARKIWD EIAQAAWRCADPGIQFHTTVNEWHTCLNDGEIRASNPCSEYMFLDDTACNL  
ASLNLLSFYDQKEETFDD EAYRHAIWTTVLEISV VMAQFPSKEIARKSYDYRTLGLGY  
ANIGSLLMVMGLAYDSDEGRAVA AALSAILS GEAYAQSARMAKEWGTFSRYPANADVMLR  
VVRNHRRAAYDAKSEEYEQLSII PQGLKEWACPGNLIAAARES WDDALSLGQQHGRNAQ  
VTAMAPTGTIGLLMDCDTTGIEPDFALVKFKKLAGGGYFKIINSSVPPALKALGYSEES  
QKILEYALGTETLEGAP AISIEILKEKGFDDASIAKIETSLKSAFSL ESCFVSHTLGPDL  
MSRLGSETTYSSPDFSLEHLGFS DSEIEAAELYACGTMGLEGAPILKPEDLPVFDAT  
PSGKRGTRSIDWRAHIAMMAAVQP FITGAISKTINMPNTATLDDVKNA YMLAWKSMLKSI  
ALYRDGSKLSQPLSALAPGSDLIAD SIVALQSGEMEDEFNEQP VSKETGVSETVRAPEL  
PGMPVSPRGVRRSLPNRRTGYTQKAKIAGHSVFLRTGEYEDGTLGEIFLDMHKEGA AFRS  
ILNSFAIAVSLGLQYGVPLEEYIDAF TFRFEPNGVVQGHDIKMGTSVLDYIFRDLAIS  
YLNHRDLGQIKPEDLVATSTQSKDGNRTGERRTAFENGMS SHPSRPVQTNSTVSQLPNV  
GAEKGVPTKKGNPTLDSNTK FIRAARQKGYEGDPCPVCGNM TLVRNGTCLKCETCGSTTG  
CS\*

>SPSA8\_v1\_90023|ID:41145189| putative Arginine deiminase [Spirochaetes Bin 1 SA-8]  
MERLSITSEIGVLKRVMLHTPGAEIEAMTPREAEQDLYNDIPLQAVLQEYTS LKEFLSQ  
VARVYELSDILAESLEDTGDKFEFL TDL SRCFPIRSVMETLMAMPARELSQAI IQGIPSP  
KLSLSSRLSEHSFISRPLNTYFMRDSA AVIGNCAISAATAYDVRMVEAIITR FILTHHP  
DFLARTLLFDGPSENRNYLTAEGGDIMVLSPTVLAIGMSERTTSFAVERIAQNAARASET  
DVTIFAVDLPKSRATIHLDMTFT MIDREMALVFEPVILGPQRSRVFRIDAKKGGKLSYHE  
EHSLLSGLEKVG IQLKPVLCGN GHRIYQEREQWWSGANSFAFAPGKILMYASNLYTLEAL  
SNAGFSVVP SKDFIAGKDN PANHERLAVTFEGIELARGGGGARCM TFFPIEREDL\*

>SPSA8\_v1\_90024|ID:41145190| conserved protein of unknown function [Spirochaetes Bin 1 SA-8]  
MAKRRIVIGAAGRDFHNFNTRFRNDPSCEVVAFTA AQIPDIAGRKYPAELAGPLYPHGI  
PILLESEL PNIKSMNVDECVFAYSDVPYNHVM SLSALVNAAGASFTLLGPKDTQIKSTK  
PVISVCAVRTGSGKSQTSRKIVQMLMKRGLKVVAIRHPMPYGD LVKQKVQRFAKVEDLAY  
HKCTIEEMEEYEPHIVRGNVIYAGVDYEA I LREAEKEADVILWDGGNNDFFPYVSDLLIT  
VADPHRAGNEVSFYPGEASLRMANVIVINKMDT ASPENIQT VRENITRVNPNAMVIDAAS  
PITVDKPELIKGRVLCVEDGPTL THGMMKIGAGVVAARKFQAAEIIDPRPYVTGKLAET  
FRIYPNIGTLLPAMGYGDEQIRDLEETINRTDCDSVVIATPIDLNRVVKIKKPTVKVGYD  
LQEIGKPDLEEVLD DDFCTAHKL\*

>SPSA8\_v1\_90025|ID:41145191| conserved protein of unknown function [Spirochaetes Bin 1 SA-8]  
MTSDLCKEFN FSETG SNRGT PPRAIMT TLLAGDMKFRIEEENPKRQRFFNLMGIQPESVR  
SLELLHTREVLVTSRAESLGD LNARAFASGGADGLVTQDPGCILGLTVADCMPIYLYDAE

TQAFGLLHSGWKG TGILRQALSVMGKAFSTRPEN VHVILGPAIGSCCYRVQADRAFQFQK  
EFGPGSVIVKQHGS GEPEYSLDLVAANKKLARELSIASVSVVGECTCCSSDFGSFRRQNT  
QVSGEGAFSRNLALIGYFP\*

>SPSA8\_v1\_90026|ID:41145192| putative Ribosomal large subunit pseudouridine synthase D [Spirochaetes Bin 1 SA-8]

MKIVPFSETAQP FVVQESADYVFLYKPPFFHSVSLRSADEPSLA AWYRENCLEWATAFQQ  
SCLEYSEKNRISDALKTR L FSEFGMLSRLDYQTSGLVAF AKNPEGILRFLRIAAGSALEN  
GIARGFGLLSKEYLLVCT PGGNGVRGSKPLVIPGF PFDELQKTKISGYFRSWGEKGRVA  
CIAPEFVSSVQAGK KLSREL YETQFEMLEKEWRDRYAGAKPERTILAKAVITRGRHQIR  
AHSAWTGHPIMGDAEYGGQPSRRLFLESFAMTIPSEEGKPQRIELYPEHELI\*

>SPSA8\_v1\_90027|ID:41145193| ABC-type multidrug/protein/lipid transport system, ATPase component [Spirochaetes Bin 1 SA-8]

MADFFETDDVTKGYDSQITRRILTYIRPYRLIVAITLLALALSTAGELLSPVIIRRAIDD  
ALMKTWYGFLPETRLTEANRELKLS DKDPFIGGKIYVRTSRLSGLSTA EKKDLEAKGLFD  
TREMIVFTVDPASEAQAALRAARPELFAAMDGPYGVIPMEKLRALAAADAAALRQADSAQ  
IASYVLLLLGILATV LVSTFLMVYFSNLLGLKVMKDLRMQIYSHVLTRSMAYLSRQPVGR  
LVTRMTSDVETINQFFTDVLSAFIKDATIMLGALAVLFFF DVRLALVVTATLPFVLT VSN  
IARKKARDAFRNQRK WTSKVNSYIAENLSGIEVVKLFVQEDKTRKTFMGIDEALKKANLG  
EMYVFATFRPAVDFFATMTSAVVIAVGAGFYLAHAISLGTLIAFINLINMFYSPIKDMAE  
KYILLQSAMAGGERIFALLDADD TIPDMPKLPMPSRVRGHIEFDSVWFAYKEEEWVLKDL  
SFNVEPGQMVAIVGYTGAGKTTIANLITRFWDIQKGEIRLDGSPIRDPLHLGLRRAIQPV  
PQDVFI FSGTIEDNIRLGTQITEDRMKLACKAVHADEFIEALPNGYTTILSEGGSNLSQG  
QRQLLSFARVLAHDPSIIILDEATSSVD TETEQIIQRGIEGLLSGRTSIVIAHRLSTIRR  
ADRIIVLAQGKIAETGTHDELIANKGLY YNL YLLQNSGRDV\*

>SPSA8\_v1\_90028|ID:41145194| ABC transporter related protein [Spirochaetes Bin 1 SA-8]

MIMLKEFKTIFPYLSKYKFRYIAGILFLMLV DAAQVLIPRFVKQAIDIIALGTFSIQEIW  
KPVLSMLAVALVISIGRFLWRLFII GASRQIETEMRDALF SHLLDMSASFYQKNKTGDLM  
ARATNDMNAV RQALGMGFVAFVDGVFMSSMILIAMISDNPAVALYTIIPLPLITVLIFFF  
GRLVGGQFKK VQEVYSKLSDIAQETLAGMRVVKAFVKEKHFS DQFSSENDHYRDAVMDLV  
KTFGFFFPLISFLSGISTVILLSVGGSAVIK NRMSPGGIIAMISYLEMLVWPLMGAGFTV  
NIIQRGAASLKRLNEIMNEKPEIASASNTVAQPEGTGIEIRNLNFSYPDSSRKALSGISL  
RLEDGRTL GILGRVGS GKSTLLKTL PRLVDTEKGSVFIGGIDICEFELKSLRSMFGYVPQ  
ESFLFSDSVRANICYGKPDITEERFHELARIASLERDVKLF PAGWDTVVGEKGLT LSGGQ  
KQRIAIARALALDPPILIMDDALS AVDAETEEKILANLLVERQKTNIIVSHRVSTLRNA  
DLILVLDGGHV VQLGTHEALMAETEGFYAEIARLQELEAAA VSGSKEV\*

>SPSA8\_v1\_90029|ID:41145195| conserved exported protein of unknown function [Spirochaetes Bin 1 SA-8]

MKFCVKKLLAFSLVISFSLAPAFLFAQNTAF SVSLEAETGTVKVF SHTYRVGPAPANTNF  
DFVTMGGQEILPFSRLSAELLIANRHSVRFLYQPLEIATQSVART AFTIDSITFAKDSP  
IDIIYSFPFYRTTYLYDLLKGENFLGVGAAIQLRNASIRFSGFDGSRNEVRTVSQNLGIV  
PALAVAGKFSPPGNFYAGFEATGIYASSALFN GATFQFEGSILDASVRVGKSFSNGVEAF  
LNARFLGGSAAAGVSQYPDLYWTESQDDE TANYLATGSLTLGARLTL\*

>SPSA8\_v1\_90030|ID:41145196| [rnH] Ribonuclease H [Spirochaetes Bin 1 SA-8]

MDEIIYTDGGCSGNPGPGAWAYVMRYRERLREDSGFSPETTNNRMELEAVIQALSFVRQ  
RRHAIAAQSARHPSWLLSPIKIHTDSQYVKN GITAWIAGWKARGWKTSARQPVK NQELWM  
RLDELVTELQPEFLWVEGHAGIPDNERC DFLVRETMEKHSQSSP\*

>SPSA8\_v1\_90031|ID:41145197| protein of unknown function [Spirochaetes Bin 1 SA-8]

LKITVEYLG FLEIDSIKSGSAMELPDGTTAGEVFSRLGLKGSYLKYVLP IINGTRAGHDQ  
PLKDGDKLFYIYLPVGGG\*

>SPSA8\_v1\_90032|ID:41145198| [fusA] Elongation factor G [Spirochaetes Bin 1 SA-8]

MPFSTEQIRNLA IAGHGGTGKTTLLEHILFQGGVISKPETVESGKTVSDYGEDEIARKIS  
VRSSLTHCTYKDTKINFLDTPGSSDFVGEVILSFRACESALLLVDARTGVQIETIKLWRN  
LDSRTKPRMVFI AKMDED RASFQNALDDIKAKFRMAPVPVSIPMGEG LDFNGVIDVINAK  
AYVKPASHDQKEVASEIPSEYKDAFEAARAQLFEAAAEGDDDLMEKYLNEGELSHEEMLT  
GLKKALALAKIVPAFAGAGSRNSGITPLLD FIVASGSPKDLAPEEVVDADGNITQVSVD

AAKPASAMVIKTQIDQFSGRLSFVKVITGALVLELDVNVNRDLRKERISKLYTAQGKKLE  
EVSSLPAGDIGIIAKSASLKTNDTISAWDKPFAYKPLKLPTPVHMLAISALNKKEEDKLN  
ELLLKAAEEDLTFQVNYNTETKETVIAGMGELQINMILDKIKAQSKIAAETRIPRVAYRE  
TITKKANA EYTHKKQSGGHGQYGRVVFDVEPLERGGKYEFENKVFVGGAVSKGFMPGIEKG  
IHQAMEAGVVAGYPVVDVKTSSIIDGKEHPVDSSEMAFKLAARGAFREAMRQANPVLLLEPI  
MNLTVYVEEKNLGDVMSDLSGRRGKISGQNPIGGGIVQVDAQVPQAELLRYAIDLRSMST  
GTGSYEVEFSHYSPITGKIADDDVIKAAQAFKTAEEEEE\*

>SPSA8\_v1\_90033|ID:41145199|nrdR| transcriptional repressor of nrd genes [Spirochaetes Bin 1 SA-8]  
MRCPHCGSLDDKVIDSRSLANGEAIRRRRECLSCGLRFTSYERIEEKQLLVIKRDGRREP  
FERSKIERGLIRALEKRQVMSIENLINEIEDESAQA AKATNEVSSELIGNLVLSKLYR  
LDKVAYIRFASVYRKYETPDEFMREIELLEKNKQDQ\*

>SPSA8\_v1\_90034|ID:41145200|SPFH domain, Band 7 family protein [Spirochaetes Bin 1 SA-8]  
MLWFILGFSLCIAWWLSFALIAFVRKQKPVYIFLLAAGLVWGAELILAFAYESLAVFPL  
FLVPVIMLPMRIINEYQRGVLFRLGRMMAVVGPGFNLILPFGLDVMRTVDMRTFTIDV  
SKQEVITRDNPVIVDAVVYFNVFDPTLAVNKVADYTKSTSLLAQTILRSVLGQHELD  
LAKRAELGQILKELLDEATDPWGKIVTAVEIKAVELAEATMKRAMARQAEERERRAKVIA  
AEGELQASEKLAQAATVMSAAPSSLQLRYLQTLSEIAVEKNSTIIFPLPMEILKYFSAEK  
KEP\*

>SPSA8\_v1\_90035|ID:41145201| conserved protein of unknown function [Spirochaetes Bin 1 SA-8]  
MDFSEKVKSFIEKSIDSSKDFIAKAGSQAQVWSAMGKLFEEIQLRSQAQHLMTQLGTET  
YRLLVEKNEPMIGSSTQEISPLLQQLKIEREIAEKEEAFKAAGGKDADLDGDGKPD\*

>SPSA8\_v1\_90036|ID:41145202| putative phosphoglycolate phosphatase, bacterial [Spirochaetes Bin 1 SA-8]  
VRKNEVRAFLFDLADTLDDIAFSVNQVLKRHGFPIYPASAYRMMVGDGFARLMERV  
LPAEAQANMSFFESLKEEAAASYKDNVMRSTKVFPGIHAVLQEFQKGVPPFAVLTKPDH  
LAKLLIGELFPDFKFLAAGDLPGKLRKPDPTRALEISGISGIPASDWAMVGDSDGDMEM  
AVRAGMLPCGCLWGYRSESELRKSGARHLLSKPWDLTLV\*

>SPSA8\_v1\_90037|ID:41145203| Phosphomannomutase (fragment) [Spirochaetes Bin 1 SA-8]  
MHTHHGKGVFMEKAQLLARAQEQYMHQESDRAFAQEVKLIASDDDFKELEDRFYRDLEFGT  
GGLRGIIGGGTNRMNLTLLVTKATQGLCDYLKEQYPTKSLSACIAYDSRRRSSDFALATAL  
VFAANGIKAYMFTSLRPTPELSFAIRX

>SPSA8\_v1\_100001|ID:41145204| 2-isopropylmalate synthase (fragment) [Spirochaetes Bin 1 SA-8]  
VEAGASQIECTINGIGERAGNAALEEIVMALATRHSIFNAATRIDDITQLYKSSRLVSTVT  
GAKVQINKAIVGENAFAHEAGIHQHGVLANRQTYEIMTPESVGPKNMILGKHSKGFHAF  
EARLHELGYSLRPAEIELVFAKFKELADRKKTVSDRDIEALVRGASAIPEKFKLASFVV  
NSGTQITATATIRLAIQNGTIEEVAAGDGPVDAA YKAIDSIVKRKLELADYRLNSVTSG  
EDAQGEAMVKVRCEGKTWNGIGVSTDVLEASIKAYISAINAMEWELESFQQGGEQ\*

>SPSA8\_v1\_100002|ID:41145205|leuC| 3-isopropylmalate dehydratase large subunit [Spirochaetes Bin 1 SA-8]  
MKQSTAMTMTQKILAHKAGKKEVRTGELIEAAIDRALGNDVTAPPAIDEFKLGKPAVWD  
PEKVVLVPDHFTPNKDIKTAELTKMRLFSRKMNISHYFEVGMGIEHALLPEQGLVTAG  
DCIIGADSHTCTY GALGAFATGVGSTD LACAMALGRLWFKVPPAIRFKLSGSLSGWVSGK  
DLVLHIIGKIGVDGALYKSMEFTGEGVGS LYMDERFTITNMAIEAGAKNGIFPVDSRTTA  
YLEYVRAQKPQAFSTDPDAQYEKTIEIDLAKVPLTVSFPHLPSNTKTIQEAAGLPIHQVV  
IGSCTNGRISDLRIAASIMKGRKIDDSIRCIIFPATQRIYLQALREGLIETFIEAGAVVS  
TPTCGPCLGGHMGILAAGERAVSTTNRNFVGRMGHKDSEVYLASPAVAASAITGRLTDP  
EEICPVPLSRDVLYSMEF\*

>SPSA8\_v1\_100003|ID:41145206|leuD| 3-isopropylmalate dehydratase small subunit 1 [Spirochaetes Bin 1 SA-8]  
MAYQKTASGRVHKYGDNDVTDV IIPARYLNAFKPEELAIHCMEDIDA EFSGRVQAGDIIV  
AGYNFGSGSSREHAPLAIKASGISCVIAASFARIFYRNAINIGLPIESPSAVSALQNGE  
RVEVDFSDGTIRSLDSGRLWVTVFPFKIQEII EAGGLVEYTRRSLDAEQERTI\*

>SPSA8\_v1\_100004|ID:41145207|leuB| 3-isopropylmalate dehydrogenase [Spirochaetes Bin 1 SA-8]  
MRAKIGVIRGDGIGPEVVGSALEVLRAVSRKFHHNFEEVELLAGGCSIDTFGEPLTAQTL  
EQAMQCDAVLLGAVGGPKWDSLPGAMRPERALLGLRSGLVYANLRPVKLPQLKEASPL  
KLEILQRGIDLLIVREL TGGMYFGNRGRFTDQAGNAAAFDTETYSAP EIQRILEVGYEAA  
MSRSKRLCVVDKANVLESSRLWREVAGSVAGRYPEVTTSYLYVDNCAMQLILNPSQFDVI

VTSNMGFDILSDEASVLTGSIGMLPSASLGDMRGGKAESGTVRRGLYEPHGSAPDIAGT  
GKANPLGTLISAAMMLRYSFNLETEAQAIEKAVETVLDSGFRTADIAGHGAEKSEKLTIP  
ATTEDMTREVVRAV\*

>SPSA8\_v1\_100005|ID:41145208| conserved protein of unknown function [Spirochaetes Bin 1 SA-8]  
MRIITFGEIMLRLKSPGQERLFQSPLFEASFGGSEANVAVALARFGLEAAFVTLPLDNQI  
GKECARTLRYHGVDTSTFLRYKKGRLGIYFFENGAAQRPSNVIYDREGAVITLIDEKDLNW  
KNIFSDASWFHVSGITPALSQAADATLLAVQEARNAGLTVSFDLNFRAKLWNYGEPQK  
RMRQLAEYTDILIGNEEDYQKSLGIAGPQSADSGIIDSQAYLRMCRQALEEFPVRYAAV  
TLRESFSADHNAWSALLVSRSGFWKSRRYDIADIVDRVGAGDSFSAGLICGLIEHSNDPQ  
QALEFATAASCLKHSVPGDFAVLEKAEVEKLVAGNASGRVQR\*

>SPSA8\_v1\_100006|ID:41145209| Putative KHG/KDPG aldolase [Includes: 4-hydroxy-2-oxoglutarate aldolase ; 2-  
dehydro-3-deoxy-phosphogluconate aldolase] (modular protein) [Spirochaetes Bin 1 SA-8]  
MQNMKELFYSSGIIPVIKIDDAEKADSLAGALEAGGLQVAEITFRTQAAAKSIELFATHH  
PSIVVGAGTVTTKIEVDTAINAGAQFIVSPGFNPEISAYCIEKKISVFPGVNPNPSLIEQA  
MSLGLTELKFFPAEVSGGTKALKAFESVYSVSVFIPTGGIQENNLNDYLALKNVLACGGS  
WIVPPELIQAGNFDMITALVKSCRRTMIGFLPFVPTTESHNAQDAALEIKTPSLKRTLAM  
LGLSGTYNSKEKSKYLALGDTIIRIAE\*

>SPSA8\_v1\_100007|ID:41145210| conserved protein of unknown function [Spirochaetes Bin 1 SA-8]  
MILTSLQHIERFGAISSNLAASWLKENDFQTLPEGRYSIDGDKVFALVQQYQTKSPEL  
CFPEAHRVYIDIQLLVSGREIVEVCGAEGLAIKEPYKPDIEFFQPAADAQKILLKPGFAL  
ILFPEDVHRPCMESSSPEPVKKIVIKVAL\*

>SPSA8\_v1\_100008|ID:41145211|kduD| 2-deoxy-D-gluconate 3-dehydrogenase [Spirochaetes Bin 1 SA-8]  
MILDEFKLDGKVAIVTGSSTGLGQGICLGLAEAGASVVGVDYVPSTETEAQVTAMGKKFL  
SITANLLSIEPIPGIHKQAVDTFGRIDLNNAGIIRRADALDFSEKDWDDVMNINIKTV  
FFFSQAAARQFREKSGGKIINIASMLSFQGGIRVPSYTASKSAVMGVTRLMANEWARYD  
INVNAIAPGYMATNNTAALRADAERSEEILKRIPAGRWGTPKDVQGA AVFLASGASSYVN  
GYTIAVDGGWLR\*

>SPSA8\_v1\_100009|ID:41145212|kduI| 5-keto 4-deoxyuronate isomerase [Spirochaetes Bin 1 SA-8]  
MHTREAVNSEFAKQLDTQGLRDSFLIADLFQPGKLSMTYCHTDORMIAGCAFPLDTPIQLP  
ATKELGTDFFLARREMGIIINIGGAGIVSADGREFELDNQDALYLGMGTDINFKSKSPDA  
PAKFYFNSCPAAHRACQTRRITRAEAKHVEMGSPAECNQRVIHQYIHPAVLESCQLVMGLT  
SFYEGSVWNTMPVHHTHERMEVYL YFDLPKDGIVIHLMGKPEETRHLIVRNEEA VISPSW  
SIHSGVGTGKYTFIWGMAGENQTFDMDA VPMSALK\*

>SPSA8\_v1\_100010|ID:41145213| TRAP transporter, DctM subunit [Spirochaetes Bin 1 SA-8]  
MNLAAMFVMLFLLLFLGVPIAYSIGGASILYFLLKAPVFLAMPQRIWSGTNNFIIIAMP  
LFMLAGEIMNKGGLTKRLINFSMLLVKPIRGGLGEVNVVASMIFGGISGSSVADTSALGS  
ILIPAMVEKGYPLGFSAGITVASSTMGMIIPPSVPMLMYAMASGASVGKFLAGFVPGAL  
VGITQFVLTYIISKKNHYHPIHERSSFRTNFKIAKDGTAILMPLLIIVSISAGIATASE  
SAAIAVL YALILGFFIYRELSVKHVLAALKKTAIMSSSIMIIGGFTMVFTWILAVEQVPA  
MIANFISSGISTTMVFIFLDILILFVGTFLDVTCPILLAPILLPVMKQFGMNELQFGA  
ILIVGLAIGLVTPPVGMCLNVANKICGLSIVRIFKEALPFIICNVIVLILITFIPELSLW  
LPGLIK\*

>SPSA8\_v1\_100011|ID:41145214| TRAP-type C4-dicarboxylate transport system, small permease component  
[Spirochaetes Bin 1 SA-8]  
MSVPQHIAAPIRNKSAHGQGKRMGKKS GGSWLN TLLHSLDKTLAILLGALVFILATGVM  
ISVFLRYVFGVSWFAWAEELLTMTFIGTTFFGSALGIREEEHIALGIFKPKNPILRRLFIG  
INSILLILLSFVYYSLQWIAKVGSPSPSMGIKYL YFYIMVPVSFALSIFYAFCNILG  
LFMHLDPSTKSIFEDVTAEGGMQ\*

>SPSA8\_v1\_100012|ID:41145215| Tripartite ATP-independent periplasmic transporter solute receptor, DctP family  
[Spirochaetes Bin 1 SA-8]  
MKKAGALLIMCFLVFSMVFAQSTAKVYKMKLGHASSTESTRHKALLVFKNYVEEKSGGRL  
LVEIYPAATLGNESDMIESMKGLTQEAFVGGVFDAQTPKLNILMPFFNSQADLMKVAK  
SDIGKMIMKDAEKYGIKMLAFGDGGSRHFTNNIRPIKSPADMKGLKXRTPPIESIMKCMQ  
ALGXNPVSIPYGDYTMALKTGVADGQENPXANIGDMKFFEYQKYLTLIDYQFHPEPFDVN

LAFYNSLPADLQKILEEGAWVYTEXQENRRNMNDYYFNMISNXGVQIYKPTDAERQLFI  
KACEPVYDYFVVGKGLFTKADLDEMRRKIIASK\*

>SPSA8\_v1\_100013|ID:41145216| Transcriptional regulator [Spirochaetes Bin 1 SA-8]  
MPEIKVQSLDRTRILEILARAPNGLSLVEIAAVVDLPKSTAFRLLAVLIQHEYVVRKTDD  
ALYKLGPGFIELASHYLSLELKTESAPLMRELAANLGTIVFLARREGAMMVYIDKQDQF  
TNLRKYSIIGQQKPLYCTSLGKSLLLDMDTDAEIRLLLADTDFEAFGPNTNHNIDSLADL  
HRCKARGWTHDDQEAEPDVNCVAAPIRDYRGQIISAISTSWVLATRPDLEPEKVSVHVMK  
AAAAISAAMGYSGKNSEE\*

>SPSA8\_v1\_100014|ID:41145217| protein of unknown function [Spirochaetes Bin 1 SA-8]  
MRVSQRFFKTERNRKTNFNQLSPKYEIASVQGIFEHPLQNSTQASGLETFGALSPFVYTP  
CVQKSAHALQFTHFDSSTIGYHVAAIEFPPLDFSIDMFHNIATLIDCQQ\*

>SPSA8\_v1\_100015|ID:41145218| conserved protein of unknown function [Spirochaetes Bin 1 SA-8]  
MAKKGLLMCVCQGNCPFSQMNIFEVGNAIRREKLVDYIAIHPQLCATDGDSFLTLLQG  
DSTEQLYVAACDPTMQVKMYRDAMEAAGFSKENIHGVDIRNMSTEQAVDAIKKMLSV\*

>SPSA8\_v1\_100016|ID:41145219| putative Dinitrogenase iron-molybdenum cofactor biosynthesis protein  
[Spirochaetes Bin 1 SA-8]

MNIIVMAKGAGLGAWVDSDFAHAHQIVYVPARGGFDALGNPFLPDSSEIEEVSEALAEFV  
LSKFPDAEAIAGSFNREICEYFESHNVAVFTEPFGSVLELVEKIRAGVQA\*

>SPSA8\_v1\_100017|ID:41145220| putative membrane protein [Spirochaetes Bin 1 SA-8]  
MDVGNIYLIIAAGLLVFSVFKSKEKTKKALIVAGKSALTVVPVLVVVFLMGLISAFLSK  
ELISQVLGDKSGLPGILISEVLGSIALIVPAAVFPFTGMLHEKGASYPIIFAFIMTAILI  
GISTIPAEIKFFGARFTIVRNILTFVFIFALSILFGMLIA\*

>SPSA8\_v1\_100018|ID:41145221| membrane protein of unknown function [Spirochaetes Bin 1 SA-8]  
MKKILKEAVIYLVIAAVIVLAVALFIPAKTENVLSVAWNALLGAIKIMISVFIFIGLLQV  
WVSTEKLSALLGKEAGWKRFLVSSIIPIFIGGSLFTIFPMLKTLKDKGASYAAIFAFITA  
WSGKGPLIPLEIHFLGLKFSILRILIIIPFAVVMGLLGEFIMEAIDKRDASS\*

>SPSA8\_v1\_100019|ID:41145222| conserved protein of unknown function [Spirochaetes Bin 1 SA-8]  
MNLLETKNLTLMKDNRPLLNNLSLEIWEGHIIHAIIGPNGAGKSTLANITIMGLSGYRDFSG  
DILFMGESIKGLSVDERARKGITLLFQEPARFEGLGVSQFILAGAAKKSISLAEALHKA  
GLAPERYLKRAVDKTLGGGERKRIELASIAMKPRVLMDPEPDSGVDIDSVKYIFSVIKE  
LRKEGSTVLLITHSPEVLKHADHAFLICAGTLVDKGEMTRMFDYFNGKCVPCVHVHGAPES  
EIQLKSLAAV\*

>SPSA8\_v1\_100020|ID:41145223| SufBD protein [Spirochaetes Bin 1 SA-8]  
MSEMTSVDKEALISELLASINEHKYGPDIHIEVHGNEVLGKNLVEGLEVESVSIENGVE  
VSIRVKKGYTIKNPVHFCFGIIPDNGVQRIITTTIIEGAHAQFMAHCTFPNAVNVQHIM  
QASIRLEKGSLSYFERHVHGPEGGVTIKPVTRVTIAEDARFSTEFELIKGAAGTIELDY  
EAECGKNATVDMLTRIFGRFGDRIHIREAAHLKGDGAVGVLTSHIALKNSASAVIENEIV  
ADGSYSRGHVDCKEIVQDQAVARAIPVQVNNHLAHTVTHEAAIGSVDSKQLETLLSRGLN  
EDEATELIIQGLLS\*

>SPSA8\_v1\_100021|ID:41145224|argD| Acetylornithine aminotransferase [Spirochaetes Bin 1 SA-8]  
MKMEALDLKRNVLVPCSYHLYQRPPEIVRASMQYLFDFANGTQYLDFFAGVSVMNCGHCNP  
QINEAAKAQIDKLQHTTTLYLTRPIGELAEQLARILPGSIKRSFFCNSGTEANEGAFLAA  
RLFTGRRKIAALTRSLHGRTNLAMSATGIPMWRTDPFLDTAHTVILPGPYDETAGMVTDA  
AADASLSTISATLACRDFAAALIEPIQGNGGIPLPDKYIQQLRQLCTETGTLLIADEVQ  
TGFARTGTMFAIEHSGVVPDIMTVAKALGNFPIAA YCTTDIAQAFTKPSASTLGGNPV  
SSSAALAVIRYIEQENLVHRAKELGEKLMTGLELKNRHPMMYDVRGRGLMVGAEALQKAD  
GSPNPEGTDIVLEFTKDHGVLIGKNGLYRNVLAFAQPPLIITEENISKMLSVLDDALTHLS  
KTSAS\*

>SPSA8\_v1\_100022|ID:41145225| Peptidase U32 [Spirochaetes Bin 1 SA-8]  
MRCYFGKQVELLAPAGTYQILESLLIDAGADAFYLGKRLNMRLHRSEYNFSEAELIKARE  
LTRRTGKNLYITVNNLLSEKELSEARQWLEFLAEVQPDVAVIVQDISLLSIAREFGLQIH  
ASVMMNAHNIPGIRELQACGVTRVVLVSREASFEQARKIHEATGIEIEYFAHGDLC SAHGS  
QCYYSGLMFGMSSNRGLCMKPCRWPYSASYVVDGKEQSSTRFFPLAVRDMFLYPHLQDAI  
EAGIMSFKIEGRMRTAEYLPKIISAYAKFLDALCGSKAFDPLQEYEQLYQNRMRDFTCA Y

AFGKPGSAILNERWEGTGKIFYSTGKVFVSAKEEPEAGEAQIQRVRSRIESRNTGDRAAPA  
GIGKKPELSVRVHSRDQAEKALQNGADILVPLDSLPGFQPHAHDLIELKRAFPEARLA  
LSLPRMMNDDEFEEIRQVLSRLNTRYDEL YISHLGQERYFREAAPALCADFSTNIYNSRA  
LKFVKSREGISTAGLSLELKALELLDLLEAVSAEQAANADNTAHPPELLAYGRPTVMYMELD  
PFQAVREKSGLGRGQPMSVTKLVDEKGYQHPVVGDRGRFHVLPVKPVNLYRLIPELAKA  
GVRRFRIEGATMEPEQLGIVVRAFADLFQTGIIEPDRIPRDQAGEWL GALGMLGPEGKEE  
Q\*

>SPSA8\_v1\_100023|ID:41145226| conserved protein of unknown function [Spirochaetes Bin 1 SA-8]  
MTEVQSWSNLTRAERTKNALIKHGFDALVVSTKKEEALAEVMKFIKPAKAVGFGGSMTVKA  
VGVEKATAAGAIILDHKNPGLSAEEKMEILRAQLTCDVFISVNAVSMEGELFNIDGNG  
NRVAALTFGPRKTVVVVGANKIVENEEAAWARIRAWASPMNNKRLNKENPCVKTGQCMDC  
DNAGRICRVYQVLRKPSVSDFTVILVGEELGF\*

>SPSA8\_v1\_100024|ID:41145227| Metallophosphoesterase [Spirochaetes Bin 1 SA-8]  
MKISWMDERLTAPQKRVLWSL GALLLCLAMNAYHYSLEGAKGLYLWNRTGLFRGLILMA  
FIPGSLALLSFPLEKLLKQKSASKIMRGISLASSVVVALLSAGILAFIIGPRSGSVEPPR  
LKLINPVQGIQSSPSLAAGGIFNSAAPLTAQPAGQSVVPASLAPPLRLSFSDDPHWG  
ADTSNTQARSDILAHIAERKPD AFFMLGDTVETGSKALMWNFALADLEAIIPSVPLRVLL  
GNHDALFGGQYLYKKA FMQKDFKSDSGSPYYSIDAGAAEIVLDLPWGTEQFNARQKKW  
LTKTLTESNRTKPVIVLSHSFFYASGYDDPELDKPWYDHFQNI PAITPLFEQHGVDLVIS  
GHNHYQEYLEKNGVRYAVIGAMGGIPDPKPKYVSPASKWIAVNQHGWLDVDIYEGEMVLS  
FRDQNEVLHQEQIRY\*

>SPSA8\_v1\_100025|ID:41145228| conserved protein of unknown function [Spirochaetes Bin 1 SA-8]  
MDMVRLQFEKGRRYRCCFSFLFLAITFYSAVLTTTLGAQDLPGVKEIPDIFSNSDLLAGT  
NTGLIRIRKDGEKTTLWQEGRVTAIAKTAGGWFFLSSKGVLF SADLRKFENRSAGLPKKT  
IKLVVSEDPLSTQLVKETVNLTAIAVDPNQENRLLVSTGSEVFFSETFGRTWISLGSPSV  
SGGIKAAAFGPPSQNSKNSSVWVSTAIGVFTRDLDAKNSWASASGGLPPVLGSNYEEVS  
GFAYSTSLPSRGLYAATFTGQIFQWDSSAMKFVPRFSAGKDFSSIEAFSISHKSGAYFL  
SDGIITRLDSQNDGKLSAVQLKPATNILAARLKNALSDGNPAINCLALLLEEQKPNEEPL  
IFNECWQLPSFAAAKPESSAALSKSEQRKIAANGKRGLYLQTGFLIDSASRSKYFSFMQE  
KNLDTIVLDLKDSDGKLRFA PRDPLLAMASPGALLDLDAFAAEAKARGIYLIARIVVFK  
DEALYRWKDGALAVRNTQDGPWQGVKKGQLVQEYWVDPYSPLVWQYNTAIAREVVSRG  
IDEIQFDYIRFPTDGENLKFIRFPYQESMNQESALEFLRYARARLDAPLSIDIYGANG  
WYRSGSRTGQNAELLA EYVDVICPMFYPSHFQE FQAQAPAE LRPYRIYKLGTLRNYHIA  
RGKALIRPWVQAFFLNVSYDRQYYNETYVANEIRGAQEGTNQGFTFWNNSGRYDDIPRLE  
PGVMNLAYGF\*

>SPSA8\_v1\_100026|ID:41145229|dppF| dipeptide transporter ; ATP-binding component of ABC superfamily  
[Spirochaetes Bin 1 SA-8]  
MSDIILSVQHLK KYFEPHQTFQTQSITGGGQKKVIKAVDDISFNIERGEIFGLIGESGSGK  
TTTGKLVKMLIEATSGKIVFNGEDVTVLNKEKLQEYRKKVQMIFQDPYASMNPRFKIKDV  
LEEPLIIHKVKSIEERTKMIVKALEEVKMTPEEYMGWRPHMLSGGQRQRVATARTLIL  
NPLMLVADEPVS MIDLSTRAEILAMMKEVQKIMGLSYLYITHDLSTAR YFTDRIA VMYLG  
RIVEMGKAEDIIDNPLHPYTQALIEAVPEPEPGKVCIIKELPIFGEIPSPANIPPGCRFH  
TRCPYAVDDCKTLPEPELMLDGDGHLHACRRFKEVAQIRGRKIVH\*

>SPSA8\_v1\_100027|ID:41145230|oppD| oligopeptide transporter subunit ; ATP-binding component of ABC  
superfamily [Spirochaetes Bin 1 SA-8]  
MNSLLRVENLQMHYFTSKGAVRAIDSINFDVMPGETLGLVGESGCGKTS LGTSILRMPTP  
PGRYVGGKILLEGTDIIPLEKEVRKDIRWARISMVFGAMNCLTPVYTIGKQMLETLNE  
HSEMPRNDAENLMKEYLGYVGLPPEIMGRYPHELSSGGMKQRAVIAT ALFLKPSLVILDEP  
TTALDVIVQSQIINLLKKLKAQFNLSFIFITHDLAEAEVADRICVMYAGKIVELGTNEQ  
IYGSSGPAHPYTERLLAATPRLFKKVEKLHFIPGTPPDLIHPKGC RFHPRCHKAFERCR  
EEEEPLVAIEPGHFSACWLNHKG\*

>SPSA8\_v1\_100028|ID:41145231| ABC-type transporter, integral membrane subunit [Spirochaetes Bin 1 SA-8]  
MNLNDTKYRLLEFWSEFRKERSGLIGLAILITALLVVIFEPVIIPWKEANSKWRSIDYWQ  
DNSPSAPPAWTFNAFSKLLKAPVTVKLEKGTKEETELDGGVRLVTYTFYDYKADKAPLDLI

FHTSGTGDIPFSVSIERPDGQVIDLAQRFEQGLNGQDIRISADNDGREASF AFIKQIESE  
TAIEQFSGKSLRSTDLLFNARAGMSTEFKPLKGTYKLIKAMILDPENFKIEDPYVVVT  
GSVSGILGTDDSKRDLFSGLIAGLKWALLIGFLTS AISVLIGVMYGIISAYFGGKVDSLM  
QFFYQIVNSMPVLPVLIVISAIFKPSIFMLIGVMVFFFWTGSVMTVRSMALQIKEETYIE  
AAKALGAKKSRIIFKHMVPILIPYSFASMALSVPSAIVYESSVLLGLGDATIVTWGQIL  
HDAMQGAAILKGVWWWVLPGLLIAIMGMTFAFLGFSMDKILHPKPKTR\*

>SPSA8\_v1\_100029|ID:41145232| ABC-type transporter, integral membrane subunit [Spirochaetes Bin 1 SA-8]  
MYKWFALKRVLKGFITYIIIFILSALFNTVNEQTM RANIEEQVRAESVKLKNMQPSAIQ  
KFQQQRKDELIRLYKLDPRIMERIIFRTWNITFNFGKSTIIKSSRGERDVM TIIGEAI P  
RSLILFTLAAAIEIFVGIILGLKKAQKPGGTLDRSTSFITMIVYGMPTFWLAMILIMFFV  
YQLKIFPSAGMHSVPPPSGFMYFLDLLWHMALPLMTLLLIGFWGIAFVVRNIVLSILQED  
YIMAAARGIPEKSVLFGHTLRTAAPPLTISILSLLGSISGAIIFEGIFSWPGLGNLYW  
IAVQQNDIPVLMGDLAIVGLYQLGLIMLDLTYGFMDPRIKVGGA\*

>SPSA8\_v1\_100030|ID:41145233| ABC-type transporter, periplasmic subunit [Spirochaetes Bin 1 SA-8]  
MKKILTVSLVALALLMSVNAQVKN GPIADKVIYDVRMDQTIAIKDTAEGKTDVFFTG LDA  
KTYKGIQKADLDKLTSTYAVPSGSWSLLL NPIPKNKAPYTFQHKDGRVIFNPLAIREVRYAI  
NWLIDRKKIVDEILLGAGEPAITAQTPGQPGTYKFNLVPAKLGMTVRGNEKKAIADIDTA  
MKAAADLPENKGLAKTGQFWTYNGEPVTIRFIIRVDDPSGRLLSGRYIADQLEKAGLKV  
ERLEYDRSKAGKLVYSGDPAAWEWSMYTEGWGAGATRSWWDITISQMYSPYYGYMPGGAT  
EGFWNYENAEIDAIAQKNINGWFLTAD EYWEGNMKVQEMALKEAVRIYVCSQTQYYVANK  
ARFNARMLYGLGDGLNSWSVRSADVKPNDKGEKVL RVTQYSARGGLFMSSWDPVGV DGF  
DVYSAAIVEACSDMSTFESPNSAKDTPLRVKYDLKNVETKVVAGKDGKPEGTIAVDPAAM  
IFNSKTKK WETGVEYKDVGDGNYDYVKNAALKSYSKLSGLEYYGKWHDGQPVTLADIMY  
ATAFAYEWANKDSDDDKYYDEAYASQYQSSLPISKGVVLNKNGTFTTYFD FNWPMDKDRV  
ASSGTVSPKAGNPGRQTVVSFEIYEALAKLVAEGSKSGTQYSFSGDPSMTEVDVINPKCV  
ADIKAKLQDFVAAKYVPDAIKQWITPEQAVARYNAALAFIDKYGHAYISNGPFFISKVDY  
NANYIELSAFRDYPYKADYFPKLFATTLTRID DVKVPATVQKTS DAKIDIAVSALTYPED  
TAKAADNKAKVTVTMILADNTEKVYTAKFVSAGNFQAVIPAKDLSGLKSGAYTLVVQSVF  
GTEAPSVQPAALVLF\*

>SPSA8\_v1\_100031|ID:41145234| 5'-nucleotidase/2',3'-cyclic phosphodiesterase-like hydrolase [Spirochaetes Bin 1 SA-8]  
MVKKLRAVVLILAVLLSLSFVQNVVAQEVKITLLHTNDTHARIVESKTELGYSRIAAFA  
DAKAKNPNTLLIDLGDTFHGLPIANIDQ GASVVKLMNELGYSFMTTGNHDYNYGFDRLME  
LDRMAGFQILAAENVYKDGKRVFTPYSIQNIDGVRVAFFGLATPETAYKTDPKGIEGVSFT  
DPIVEARMVLSEIAGKYDVLVLLSHIGVDKSSDPTAIQLA QALPQIDVILDGHSHTSLAD  
IQKENTTGVLITSTGAYGAGLGVVDLVIGADRKVASKTARTITVANSPELKG DARIAQMI  
TDLGKAQDAVLMQVVGKTAVALEGKREIVRTSQTNLGTLIANAMLYVTGADV ALMNGGGI  
RDSIPAGDITKKQIFTVQPFGN YIQTGKVKGSEFKAILENGVGKLPAPDGRFPHLANLTY  
TLDVSKPAGDRVSNIMIGGKPVDPDKEYVLATLNFIFNGGDDYRMLV GKAQNDFPSDAEV  
FIKYAEYLG TITNENMVYKK\*

>SPSA8\_v1\_100032|ID:41145235| putative DegV family protein [Spirochaetes Bin 1 SA-8]  
MKLTYIEGPD LGKALVSGSFQVMKNVESLNEIN VFPVDPDGTGTNMASTVQTISA AFAEG  
IPDNVSQVLDVAAASALEGARGNSGAIFAQFFHGLAKELRNEARVSMRRFSEAAINAAEH  
AQRALSHPKDGTIISVIRDWALQLQTHAEKSSDVTEVMDSALAKARLSLEETR NILPEMR  
SAQVVDAGAKGFVHFLEGLVDYMKTGVLKSFKAQPSRLAGQALHTA HDSIEHGRYCTEA  
LLQGDRIDAEELKTFLEEHGDSVVVAGSETRARIHVHTDHPSVIFDFLET KGELSSHKID  
DMVLQVRLSGMKKRKCAIVVDSACDITDEF RLEHGILRVPLTLIANGRPRPDGDGYSDAA  
LRNRMRTDPTLVMTTSQPSDAVFKRAFEIALSSAEKALYIGLASALS GTFEAGLRAAREF  
SGRVLCVDSRELTAGYGLLVTRAVRAVAAGKSAEETARLVEQWRRNLALFVA VPDLTSL  
RTGRLGGVKGLVLRKFGLRPVITPGPDGKAESGGLYLGIRKGP EKLFRLMRKKFGKHERL  
EIQIVHVDNPTAARELADMVEQHFTPSRPVISQMGPLLSSLAWLGSV GIAALPEGEELL  
ASSAEGGKA\*

>SPSA8\_v1\_100033|ID:41145236|plsY Glycerol-3-phosphate acyltransferase [Spirochaetes Bin 1 SA-8]  
MSWL VAGLAAAYLLGSIPTGVWIGKWL FKKDPREGGSGAMGATNMFRQFGAKAGIPVILV

DVAKGSAAVLFAVWCWNMGAVRNAVGATGTAAML YQLSAALLAVAGHVFPFIFAGFRGGKG  
VATGAGALIIIAPLAALWSALGFMIVLGFTGIVSASSMVAALILPVAVALGAQSRPPSIP  
LLAFSTVLALFVLFTHRANIKRIFQGEEKRFEKLRFLARLVNKKNTR\*

>SPSA8\_v1\_100034|ID:41145237| putative DegV family protein [Spirochaetes Bin 1 SA-8]  
MKIRYLDGTRLRRAILAGTATLIANTENLNAINVFPVDPDGTGTNMAHTVKTIARRLASM  
KPVKKEKAGAVLEQTAVSALQGARGNSGAILAQFFCGLADELKADARVNARRFAEAVRNA  
VQKTKTALSTPKEGTILTVLSDWALALQEKASATEDIVHVFVMAGYKAKESLARTKTMLP  
EMKKAGVVDAGAKGFVHLLLEGIADYIRSGSIRHFARKQAETQMSAPSDSSIEFHDLALQHG  
FEPMLETGCRYCTEALLSSSSNSLDAIRLSLNLGDSIVVAGNGRMAKIHHTDTPSSVF  
DALDALGTIETHKVDDMMLQQLAVRAQAKGKANICAIVVDTGCDLPPEFMLEHGIIKVP  
ARIDINGLVRPDGPALDAGR VVSLMRHEPGFSMSTSLPDESSYTRAFSLALAHAGDVLYI  
GLSSALSGTFEAGVRAAKKLSPIVCLDSRSVTSGTGALVARAVQLAEVGMRAEKIKKEL  
AALSSQIAFFVAVRDLSSLIRSGRLHGLKSVILRKFGRLILSTNSEGKAETAGVFFGRA  
DTARVIFKKLASRLPKGENCAIFISHVSAEHEARELQTLCARHFGPQTEIHIAEMGPLLS  
SIAWLGALSAAGFAKAPAS\*

>SPSA8\_v1\_100035|ID:41145238| protein of unknown function [Spirochaetes Bin 1 SA-8]  
MTLFTLLDGKKARGNRLGAVSNAGFECVAIADNLGGMKLAAFSESAARELQDIFVQTKIA  
DIVDVHNPLDLTPMAGDDAYEMSFRTALLNEGTDLGIVGIVPLTVMMNTLAADPSKHTED  
VTREDSIAFRYGRLLARETDKPFVA VVDTGPLYDPLCRQLEAQGVVPVVRTADRALKMLELW  
RIRQR\*

>SPSA8\_v1\_110001|ID:41145239| protein of unknown function [Spirochaetes Bin 1 SA-8]  
MEKEMSKIMKTTSLSLLERIALGEYQAKDSIFEIPAAVFSNVFSMEAESTGMQVMMSGKAS  
IPIGPAAGPHTQIAPNIVAA YLAGSRVFELKTVQENXX

>SPSA8\_v1\_110002|ID:41145240| putative Allantoinase [Spirochaetes Bin 1 SA-8]  
MIFKNLLAALPGENEFRKVDIQTGSILRAISPAGTLKQSFPEEEYFDGEGLMAPFGAID  
PHVHFDEPGFTHREDFHGTCEAARGGVTTVIDMPCTSLPVTSTEALKNKLEIIQTKAV  
VDYALYGGHLHGAMSKRQIEDIVQSLKDYVVGFKTYFLSGMDTFPTISHDLFRAIKACSA  
VSRPLLLHAEDDKVVAQFWKHQEMESAGAEPWKDYATRPMEEAIAACRHALELAENA  
ATLHVHVHGTDEAAHMLKKGASCECTHYLAFDETDFERLGASLKTAPPVKEPTQKALL  
WKSLADGTISFITS DHAGAPDYEKFTGNPLTAYGGIPGTGTIFPYLLSEGLFAGRLSLKR  
FLEATSSAAARRYGLDDRKGSLEPGKDADLILVDPDATTHFLPENMFSKSKITPFAGMRF  
AGRIVGTFVRGELVYGTSRLLGGNIPHSIRKHQLSASGTIVAAQGYGNNLQWRKK\*

>SPSA8\_v1\_110003|ID:41145241| Xanthine dehydrogenase/oxidase [Spirochaetes Bin 1 SA-8]  
MKNIAESALNVRGQTQYIDDLPEPAGCLQAAVRLSDSAHGRIVAIKTDKALALDPSVQVI  
TAKDVPGVNQIGFNKPDEPLLPEHEWEYWGQPVVALVLAKNREIARAAAKLIEIEGEEELPV  
VTDPREAARNSDFILPSRTIQCGDTEEAFKHCTYVIEGRVESGGQEHVYLETQGAMA EVR  
EGGKVFVISSTQGPSGVQRAIAQSLGLPMNMVEVEARRLGGAFGGKEDQAATWASLAALG  
AWVSKKPVKLYLNRHEDMRATGKRHPYSSDFKIGAAQDGTILAFEADYYQNSGSTCDLSP  
AILARTVLHATGAYKVPNVRTGYMCKTNLPSFTA FRGFGAPQAFFVIESALDALSQASG  
IPVAEIQKKNLYREGDSTYFGMELERVTHEAFDRLLLEKTQWHNLQSEISEFNRSRTVK  
KGA AIPVCFGISFTKLPMNQAGALVHVYIDGSVLVSTGAIEMGQVSRKIATVVSETLG  
VPLENIRVERTTTLTVANTVPTAASTGADLNGMAARIACLEIKKRLAGKAGELLGANPDA  
IRFENG MIFKNGKKT ELSWKDLIVKANEARIDLSAHGFYATPGLFYDMKAERGKPFAYHV  
YGAAAVVATIDTIRGT YDLESVSIVHDIGHSLDISVDRGQIEGALAQGLGWSLLEDLRFG  
PDGKPMSDLSTYKVPDISFMPRSM DIEFLPEIENPTTPFNSKAVGEPPLQYGIAGYFAI  
LNALRAANPEGKTFYSIPLTPEKAAGFLDGEEL\*

>SPSA8\_v1\_110004|ID:41145242| xanthine dehydrogenase, Fe-S binding subunit (modular protein) [Spirochaetes Bin 1 SA-8]

MHNMTNQKIMVNSQWRVPALSFGSPLLD FIRNELGLTGTKEGCREGDCGACAVLMGEKLS  
DGTIRYRAIPSCISALGDFEGKHLITIEGLTANSKEGLTPVMRAFLDENASQCGFCTPGF  
IIALTAWLAEPRTLDIAGAITAVDGNLCRCTGYGSIRRAAEKLCRDFADLPLDPKKRLAV  
LVEREVLPKSVLAFMDDPGKRQNSPVSASAKPAEPAVLIAGGTDYYVRNPYPAQQFSPVL  
LRTIGHLSEISEVQDQFGHHVSIGSAVTIHDFFTSKLVQLTVPGIETYETQFASTLIRNI  
ATIGGNIANASPVGDITAMLMGLGALLCIGIPDDTSKQETRIMPIEKFFLGYKKIDLKPO



EMAILVRLPLDNKPANPLMFSFEKIAKRKLDIAAVNTAISFKRENGRFTSVRISAGGVA  
PTPILLEKTAQLEGGKLCNRGDAKGLAELALQVSAAAEESEVKPISDVRGSADYRKRMTGR  
LVLAHFARLFAKDGITEELFP\*

>SPSA8\_v1\_110005|ID:41145243|ade| Adenine deaminase [Spirochaetes Bin 1 SA-8]  
MGKEIIDAAGKTICDSNLHCKMLDLFSGRILDDATISIRKGLIVGINDKLEAKETIDL  
KGMYLAPGLIDAHVHIESSLLTPAEYAKVVLPHGTTTIVADPHEIVNVVLGYDGMRFMINA  
SRDVPMDIYFMVPSVCPATDFDSAGASLYASDMYPFLQDSRVLGLGEVMNYPGVLAQDPR  
LMDKIALFKNAGKAIDGHAPGLSGAALSAYVAAGIGSDHECTTPEEAIEKAAKGMYYIMMR  
EGSTAKDLLKLLPAVRPETASRFMICSDDRHSNDLRDEGHMDYSLKLLLSNGIAPMDAFR  
IACFNPSQWFKIPGTGAIRPGYKADFIASFDDFRVEKVFKNGSIVAENGLTKRNFESV  
FPPLRDSVNIKWLTADDFKIPDKGRKVRVIEANEQSIITGAAAVYPKVEAGYCVSDTKRD  
IVKIFVIERHTGSGNIGKGFIRGLGLRRGALGGTISHDSHNMILAGVDDASIFKAARHLN  
KIKGGLVFTVGDEVILDPLPVAGLMSDKNAEFVIQRLREFEQLFKEEGLSNTSPLMTLS  
FMALPVIPSLKITDKGLIDVDKFEVPSLYCD\*

>SPSA8\_v1\_110006|ID:41145244| conserved membrane protein of unknown function [Spirochaetes Bin 1 SA-8]  
MEKLFKLKEHGTTVRTEIVAGITTFMTMAYILAVNPGILSAAGLPAGGVFTATALSSFIA  
IVLMALLANLPIALAPGMGLNAFFAFSVVLGMGYSWQLALTAVFLEGIVFILMSFFNIRE  
AIVASIPKNIKNAVSVGIGLFIAFIQLNAGIIVKNDATLVSLGHVTS GPALLAIIGLLF  
TGILLAYRVKGALLIGIATLILGIPFGVTKVPENFSPVSSPAAPLLFQFQFDKVFTLDF  
FVVFFTFLLFVDIFDTIGTLVGVTQAGLIKDGTPKVKQALLADAVGTVAGACLTSTV  
TSYVESASGVAEGGRTGLTALTGVLFLLSLFFAPIFLLVPEAATAPALIIVGLFMMAPI  
KEIELGDYTEAIPAYLTILMPLSYSIAEGLVFGMISYVVIKAFAGKCLKDIPVVTWIVAL  
FFVLKHILG\*

>SPSA8\_v1\_110007|ID:41145245| Inner-membrane translocator [Spirochaetes Bin 1 SA-8]  
MDLITSILTITIRAGTSLVFATIGEILTERAGILNLGIEGIMLMGAVTSFAASFYSHNLV  
FALLVACGVGAFMALIHAFLTVTMRANQVVSGLSLTLFGTGFASFLGQKLG PQSNNFRLV  
GLKGAKFTPINVEALSQIPVLGALFKQDILTYAVYLIPLAWYFLYKTRPGLWLRSVGED  
PQTADAMGIDVIKTKYFYTILGGILIALGGAHLSLSYTPGWSNLTGGRGWIVIALVIFS  
MWNPARSIWGAMLFGGINAVQFRLQASGTNIPASFLNMLPYLGTITVLVVM TWWEALSKK  
IGAPAALGAAYMREDK\*

>SPSA8\_v1\_110008|ID:41145246| Inner-membrane translocator [Spirochaetes Bin 1 SA-8]  
MKILFEKRKSTSVPALFLVPLFSFMVSLMLTGLVLIIFGTNPFSTFSAMAKGAFGSSNGF  
SETLVKAIPLMLTGLGVAIAFRLKFWNIGAEGQLTLGGVAAAWVALFLSPSIP SALLLPA  
VLLVGCLAGALWAGIPAFLKTRKLVDETLVTLMLNYVAVL FSEYLYYGPWRDPKGYGFPG  
SAPFPDEAWLPRIMGRAHIGIYFAVVAALILWVVFKRTRWGFELSIIGASQKAARYQGIA  
VERNIFLAILLSGALSGLAGASEVTGISHRLQQGLSLGYGYTAIIVAWMSQLNPLAIPFV  
SLLLAGILTGGDQVQLMMGLPSAMGIVMQGLILFPMLAGSLFTEYRIKFIRKQPKAACVE  
GEA\*

>SPSA8\_v1\_110009|ID:41145247|yufO| Uncharacterized ABC transporter ATP-binding protein YufO [Spirochaetes Bin 1 SA-8]

MEKDKRVPVEMRSVTKTFPGVVANECVDLALYAGEVLALLGENGAGKSTLMNVLCGLYR  
PDEGEIFIRGRKAEINSPRDSQRLGIGMVHQNFKLVD SMTVLENILGMKDQGFIPDMKK  
VRAEVTSLSEKYNLSVNPDA SIWQLSVGEQQRVEILKLLYRKA EILILDEPTAVLTPQES  
QELSKVIHLMRTEGKSAIFITHKMEEVMTFSDRVMVLRKGKVA AELSTSSTSPRDLAKLM  
VGREVLFELEKKPFQPGEA VLRLKVCALDDRGLPALKDVSFEIRKGEIVGIAGVAGNGQ  
RELAETITGLRRLTAGSVRIQQKDV TNAKPLTIKAGVAHIPQDRSSVGAVGDMSVASNL  
AMKDYRKKPLSVGIFLIPQRILSMAKKLIDTFRIATPSPETHVKFLSGGNIQKTILAREI  
GSCKNLLVAVYPSRGLDIGATESVRKQLVEQRDKGLGVLFISEDIDELIQVADTILVMFE  
GKIMGNVPAASADPEKIGLMMAGVSQTENEGIDISQGVMTS\*

>SPSA8\_v1\_110010|ID:41145248| Purine-binding protein BAB2\_0673 [Spirochaetes Bin 1 SA-8]  
MKKLILGLLVVAMVFLAMPLAAQA KKPFIKIAFVYIGPPGDLGWTYEQDRGRLALEKKFG  
DRIETKYIENVPEGPDAERVIRQYAAAGFDMITTSFGYMDPTLAVAKEFPKVIFEHCSG  
YKTAPNMATYFGRIIEARYLTGIIAGRMKTNVIGYVA AFPIPEVVRGINGFTLGVRSVN  
PKAQVKVWWTNTWYDPVKEREA AVALLDSGADIIAQHQDTTEPQKAAQERGKLSIGYDSD

MGK FV GDTV LASAIWNWETYFIDTVQKALDGKWQTHQYWGGLKDGVTKLSAISKRV PDSV  
KKEVEAAQAKILGGWSIFTGPIKDQSGKEVYPAKAVIPDDKQLSMDWFVEGVVGVKQV\*  
>SPSA8\_v1\_110011|ID:41145249| protein of unknown function [Spirochaetes Bin 1 SA-8]  
MKRVIEVAVFSIFVLAFAFAFYFFAQQRKESLNASIPVAGR FVELSSQSLVQNTASAGNT  
AIKQAKINPDWDETFLSVLEINLDTDEDLEQIITIKSTTKPQSPIAIAIADFQPLTGN YI  
RIFKGETKAVRTNEFVVQPKPLLSQDSTEILCFGIDNNDLQCLTVFSRAENQLSKYTEIF  
SEAGRVILIDDSQSQFPVPLTVVSKEQTRS VFSYNAKIKKYEAGKSEVLSGTPAENIVKE  
PAVYLDAQSFEKHLAGTWYRTVSGRNSNEPDPILLEFSPEQKKIKMIANNSMTEWNWMST  
LVSKNSIYISIENSALQEVRRLLTITTQTEDTIAVTAIAQQTVRFTQKEPWDG SFSRMSA  
RSAPLPDGA AASSETAASPRLKDQNNFSFLYTF LPGWYRNETGDEIIFQNGSMTMTVNGR  
SAKGFILQQIDGAAILDFQEVNAGTPQSRSSFLLSATR SKTGDIGTLSLEAVRISEKG  
VELLYKPLKFLKIEKII\*

>SPSA8\_v1\_110012|ID:41145250| putative Integral membrane sensor signal transduction histidine kinase [Spirochaetes Bin 1 SA-8]

MKKKSSLLLYILALTMVATVGLLWVVIRESERRNLMLEYEAFKASSVIIDEYRRDSSF  
SPKNDPRIKGVGFYSVDGTA VQKYGTAPARMTIPSRLKLP GSGESGAVPASNLLSVISAD  
RNSIELFRYLGPQTAGRGMGMGMGRGRQSFLVNPPA APYPPNSLPPGSADPGLLSNLNTP  
LYVWIEYSADSYFRARNSLYLAFFISAVLLILFGFLTILFQHNE SLKEKEMANRELIQL  
GEARTLAHEIKNPLGIMRIQTARIRRAAAEKEDSARASLEKNEAVIFASAENIDNEILR  
LSSLTDRIREFLKAEPIDFDINLVTFLRSYKERYRHLENEGFVFSLELPDVAEAVVQAD  
QNRLESVLDNVLANA KEACTAIGLEDKRITIRLYIQGKYWCVA VMDNGPGIPKELESRI  
TPFFTTKEKGSIGLAF AKKIMQSFRGDLIYEGSQESGAVFILKFPAAVKQ\*

>SPSA8\_v1\_110013|ID:41145251|rocD| Ornithine aminotransferase [Spirochaetes Bin 1 SA-8]

MKSQDYIALDNTYGAHNYHPLPVVISQAKGCKVKDPEGKEYFD FLSAYS AVNQGHLHSHI  
VNAVKEQLERVTLTSRAFHNDKMGLFLKKLCDFTGYETALPMNTGAEAVETALKAARRWG  
AEVKKVPNGKQQIICAEGNFHGRTIAVISMSTDPESLVNYGPYVPGFVKVPYADANA IEN  
AITPETVAVIIPIQGEAGVIVPPAGYLEQVRNICTKHNVLFILDEIQTGFCRTGKRFAW  
QHENARPDIMCLGKALGGGIMPISAIVADHSVMNVFTPGTHGSTFGGNPLAGAVGIAAIE  
VLENEKLEEHAERLGLFRKEISAIPC PKMKLVRGKLLNAVVFEEGF EAWNVC MALKDA  
GLLAKQTHGNIIRFAPPLVITEKELMEAVAIKNVFMNIQ\*

>SPSA8\_v1\_110014|ID:41145252|ddl| D-alanine--D-alanine ligase [Spirochaetes Bin 1 SA-8]

MKAVAVLYGGKSGEHEVSLISAASIVKNLSTEKYSVTLIGIAKDGKWYLQEMPAFSSNES  
SMAGMPAIQKGRVMVLPGAGLWYESSPSRYKKLPCDIAFPVLHGTFGEDGTVQGLLECA  
DIPYVGAGVLGSSIGMDKAITKALWAEKNLPITDYLVVRSEEMKQPDINAF LTRKIEARF  
GWPCFVKPACAGSSVGASKVPAGESLLEALHRAFLYDNKVLIEQFIPAREIECAVLGNDN  
PVVFAPGEIIP THEFYDYEA KYKDPD GARLEVPAKLLPSQEETIKKLALEY TALTLHGM  
ARVDF FMDKRTGNIMLNEANTIPGFTAISMYPRMCQAGGLSYSELLDRLVELGEE EYTKK  
QKIAYSFAN\*

>SPSA8\_v1\_110015|ID:41145253|murE| UDP-N-acetylmuramyl-tripeptide synthetase [Spirochaetes Bin 1 SA-8]

MAKPLDALTVSIPVLSRKGSVNPTIEGLAYDSRLISKNYLFFAFQGLHTDGHAYIDAAIQ  
KGAVAIHDKELATQNPEISYIKVPDARLAMSQVADDFDHPSDSLYVIGVTGTGTEGKSTT  
VYLIYQLLKLAGFKAGFFSTVMSDSGSGEAPNPEHQTTPEAIAVHQYLASMRDAGCSFAV  
VESSSHGLSARTGRLANVHFDCGIMMNVTHEHLEFHGTWEQYRSDKANLFRNLDTHCHSK  
QVAGLETPLPSFGIVNADDP SASYFTACTQKPVYSFSLNTNSATVHASNLVPDERGCSFI  
LNDQEGKHHPARINLPGT FNV MNAMAALLAVSKTTGLACRDLIPLLSQLKPVRGRMMRIS  
RGQPFEVVIDY AHTPSSFETVLAPLRKQYAGRIICLFGSAGERDTAKRPLQGSIAEKYCD  
ILVLTDEDPRGEDSMRILEEIAEGCKHKIGNTDLFLIPDRPAAIRHAFSLAKPGDLVLLL  
GKGHENSIIYHDRVMPYDEEKEALQALSELGFN\*

>SPSA8\_v1\_110016|ID:41145254| conserved protein of unknown function [Spirochaetes Bin 1 SA-8]

MKKT LIVLFLILALVPSAFGQFRFEIGANAPVAVGFITGDGSLY GDFLEVIENVGLIPIP  
NLSMLQANLGGILRIGAGIKAQSILVASLAYPAALVELSLGALSINAGIGGLYFGYYAL  
GNIYGLEEMDVLLPELSVWLGF GKKRSFRIGGGAIGILSSSLDISEVPFAAYAGFKVVLE  
\*

>SPSA8\_v1\_110017|ID:41145255| 6-carboxy-5,6,7,8-tetrahydropterin synthase (modular protein) [Spirochaetes Bin 1

SA-8]

MCRSGTDRAFSALFCAIGPVAERAPYQYYMFMYHTRIESTFSAAHHLTHYNGKCERQHGHN  
NYKVYLWARGGKLDDEGMLVDFGRMKTALKEVLAILDHQDLNELGFFSADPSAERIAEFI  
FNQVRENNPELPICAVDVFETDTSMARFSLD\*

>SPSA8\_v1\_110018|ID:41145256| putative Radical SAM domain protein [Spirochaetes Bin 1 SA-8]

MPGHEILPAPSQAEIKNPSWDKASARILIVRLSPFFDVDVSTSHHVLYAELAAAENSYFI  
DFSFFPGKDQRALYQKSGNPWFSTIIAGRSPKDFDLIMISNAYALELINLPYLFSTAGIP  
LSARKRMESEDSPLVILGGSNAAAAGAVVAANGKYPASDALVDGIFFGEAEGAVTKLVYF  
LCDTAKTKRRRLAAAASIPGFWPCLLSEGTRRQVSNLRPASVLKPLLFNGPNKTVRLAI  
TAGCPGYCSFCLEGWDRRPYREKPLAILLEEAQVLKKNKGADTLEIYSFNFNTHQDIFNL  
IFSLNRIFLKVSFMSQRLDILAATPRLFKAELAGGKRSFTLGIEGISGRMRSFYRKGFDT  
KDLSTCIDLVAAQGVKELKLFYILSGFENEADLTEFDGFLKELSEKRRNKAPGLRILASA  
GYLVRLPFTPLQYAPLVDRDRLEKISSRLETSCLANHIEFRLASNFSEYYIDQLMTLGG  
HLLFGWLNLPASGIVFDGTADKKAYHALREFIARNTIAFEPLMAEKDASFTPDFGFMEP  
LSHFATLFRHYREASEFKNRPLCLGSTCSGCEVCDSKEEIRFMTSHTMTEPKEAAYAQR  
AKLMEAKARFKPVFIDVTMSRDFAFSSSEYREASLLKYLFAAFSGSDRLLFTAKELIFSK  
NEAFESILKPWYGRFGMSRFALYGPDSVRSEAMLAELKKPSADSGLVSLTAQARAPAQ  
ALKASILCPPMNSAVLARLFGTYLTNAGLSPIMRKSSGKIFFDLTAKSIQKKMIISAVLA  
EGENPEISACGHKTDLSALFSMIEDEAGRPLLQIVEIVNALD\*

>SPSA8\_v1\_110019|ID:41145257| Helicase [Spirochaetes Bin 1 SA-8]

MSMNDFLSLGLESSVCEALSKLGYSTPTHQKLAPEILAGKNIFLQSETGTGKTIAAYAA  
PILTKIAGKSASAGPLAIIPTQELAVQVERKIDELAQLSGKPISIFTLGGSPISRQE  
AALKKKPHIVVGTPTGRTADLVTRALSLKNLAFFVLDEADRLFSQEYRDEVETLLARAPE  
ESIKILASATIDKKTAAAREFIKHPVSLDLLEEGVLSADIEHWAFYVEHRKRIDFLRKL  
ETALRPSRCLVFASSSERVIKAGERMQEMGLPAAYLISRQDKEEKRVAIERFTTGLSRYL  
VTTDLGARGLDIPNISHIISLDVPEDASIYIHRAGRTARAGKKGVSILADQIDLSKASR  
IAVMRGFVFRTKMLENAQVLEPTTEEFFAYVEEAKEKERQEYRKNRGLKG\*

>SPSA8\_v1\_110020|ID:41145258|rnz| Ribonuclease Z [Spirochaetes Bin 1 SA-8]

MNLEAFILGCGGMMPLPYRHLSVLLRREGDLFLFDAGEATQISIRRLNLRWKKITAIFI  
SHMHADHVTGLPGILMLNSQVDRDEPLYIFGPPKIAEYVEQSRRSLDMYINYEIIIVREIA  
EPAVVWEEKFRIRSFGLRHTKMCFGYTMEEFQRPGMFFPEKATALGVPRGPLWSRLQNG  
QSVTIPGDITILPEQVMGPARGKFSFVTDLSYFPEISNEVADSLLICEGMFEDALLT  
TAMEKKHMTARQAAQIAANAGMTKQLGLIHYSRYADKELKLLLDEAREVFPATILTRDR  
MNLPIEFVD\*

>SPSA8\_v1\_110021|ID:41145259| membrane protein of unknown function [Spirochaetes Bin 1 SA-8]

MRKKLRVAIGILSLVAAAFTHISFIFRLSEIKASGELASGAEYSILRNAVVSVTTKEDFQ  
DRFIRDRLALYDGSTRLLAAQVLDENGLSVWKIPAESKYFALPNQKGGGRAGFSSPQWST  
VVFTTPLSGNMRLAALYASVFTSEISNAARLPSFVIGGWFLIVLFLSFFLTKDKEEGLLP  
EPIDTKAAAERQGSEPIREMVQTQEGLIEMPPLEKTSVSGGTEPVSVQEKESLEPEISKPE  
TSQMLEQQREAELSPELLAAYGLSLDTLEKSGMTSDGNAQTTFESKQGSIQGPLSKSGNF  
EESLQKFEEIIVLWTSRQKPAEPAQPALFESQALKHPAVQPEIASKTLPSTLETHTEEAS  
ASHSESETEQELPEGLDQEIEETLEELETEDSKPLNHDEPEIRPYKENDAAIPTSAEKES  
QEKEKRDISALPMLPSISEPNLENLLDNELAHGMERETSLMLIHCELSGPQDPASNALFA  
TIRDYFVAKELMFELYKGGFAVVMPGMDLGSSLKMSIEDLADVLAATMNLKDYKLEGEPPVF  
IGISSTGGRAIDAQKLYREASTALHKAYSGSPWHILAFRPKIASQM\*

>SPSA8\_v1\_110022|ID:41145260| conserved protein of unknown function [Spirochaetes Bin 1 SA-8]

VKNNVRPSMLPSGWYPPDKASMQAFLRDALRPHVQKPEELALGSEMTPDRSSAQAPAGACA  
CIAPHAGWYFSGNLAARAIASLAPAETIVVGGHLHRSSPVCYAPEEGFETPAGVLTADT  
ALLNALLSELKEEGLPPVVPDMQPDNSVEVLLPMVKLLHPGSMVLWLRSPPRFEAKLLGQ  
ALARCACTLERSVACVGSTDLTHYGPNYGFMPAGRGKEAVAVVKNKNDKPFLSALLAMDC  
EAALNLAQKNNSACSAGAAVTALAFALGRGAEQARLIEYGNSYDSMPSDSFVGYAALSFR

\*

>SPSA8\_v1\_110023|ID:41145261|murD| UDP-N-acetylmuramoylalanine--D-glutamate ligase [Spirochaetes Bin 1 SA-

8]

MDNFTFSLSDIPGMKVTIMGLGLHGGGLESARFFCDRGALVTVTDLRDETIVLKPSIEALG  
SRRIRYVLGRHEANDFSSADIVIKNPAVRKDSPLYLAARQIESDISVFLRFSRSPFVAVT  
GSKGKSSTASAIYFGLKFANLKALLGGNITVSPLSFIEETAPERPVVLELSSWQLGDLKG  
KGVLPKPKVSILTSIMPDHMNYYSMEEYVADKRVIYSEQDETDFTICDFDSEWGRSFATE  
TRANVLWFSGKAASESAFRRGAWLSADTDGKIFGYCRFEQTKESVIEEILPPNLRVKGEH  
MRKNLLAAGLALRAMGLDSAITAKAMGEFPGVEHRLEFFAEARGIQWYNDSAATIPDAAE  
AAVSSFSEPVVLLITGGTDKNINFAPIQKA FEKAAVIVLLKSGTDMIPILKATGKLFEG  
PFDNLNDAIAAAAANKAKPGMAVVLSPGCASFMMFLHEFDRGEKFKAAVRNYLKDSAA YPT  
NESEGILS\*

>SPSA8\_v1\_110024|ID:41145262|livF| leucine/isoleucine/valine transporter subunit ; ATP-binding component of ABC superfamily [Spirochaetes Bin 1 SA-8]

MANLLEVSNVSLHYGAIKALDNVSIISVEENEVVTVLGANGAGKTSLLRAISGLGKLSGGT  
IRYKGNLTDNLPYTLAGMGIAHVPEGRHV FATLTVRENLLGMYGVKRFPRGSSQKSKE  
DRVYELFPIKERKNQLAGTSLGGEQQMLALGRALVSSPSLLLLDEPSLGLAPIIVQEIF  
DLIRKIHIEEKVAILLVEQNARKALKAASKGYILELGKIVMEGEAKKLAEDERVRHAYLG  
GQASSC\*

>SPSA8\_v1\_110025|ID:41145263| ABC-type branched-chain amino acid transport systems, ATPase component [Spirochaetes Bin 1 SA-8]

MSITRSLLDRIKLGSGSLPPLGKLSYAAIVLILVFPFIPFIDNYWIDIGFYFGIYAL  
LGLSLNIVLGEVGLFDLGHGTGFYAIGAYTTAILNTHFHIPILLLPVSAIIAGLFAWLVT  
SPVIHLKGDYLCIVTIGIGEIVRLTMINNPLGLTGGPNGINGIDTPVFFFPIISSRQFY  
LIWIVMGFVTFGLLRQRSRIGRAWNFIREDETA AEALGVDVRHYKLGAFILGAALAGIA  
GNIYASKQMSVSPESFTFMESLLFCIVLLGGLGSIPGTMLGALVITVFPEVFRPFAKYR  
LMFFGLALLFMMIFRPAGILPRKRD SLETLKKAISGKRKRKEQAAEAGAEKSLTHPSVQ  
PVPTANKRGGMLLSVRDAHLSFGGVMAVAGIDVEVERGKITALIGPNGAGKTTLFLNLITG  
IYKPQKGSISFNNGEEISGQIPHRIVQKGIARTFQNI RIFPTLTCLENVLCGQHCHGKAGY  
AASIFHLPYQEEEEQAMFDSAKRCLERVGLGDSL DLLASSLPYGKRRYLEIARALAVKPD  
LIVLDEPSSGLNDAETDELADLLIDLVRDGY SILLIEHDMHLVDKVS DHVIVMQSGKKIA  
EGEMCVVRENPKVIEAYLGTDED\*

>SPSA8\_v1\_110026|ID:41145264|livH| leucine/isoleucine/valine transporter subunit ; membrane component of ABC superfamily [Spirochaetes Bin 1 SA-8]

VKTFIEQLVNGLTVGSFYALVALGYSMVYGV MKNLINFAGHDLFALGAFLGYSLLTGAAGK  
ISETIGLWGGIAFAAFVVSASIALAGILVERIAYRPVYPSGRLSLVVSALGMAIFIQNGI  
MAIWGARPQAFPASVVP SARIAVMGVPM TVLQLTILGISFLLMLIWFHIEKTPFGAAIR  
AAAQDRETATLVGIDVRKVIFVFALGPGLGGMAGLMNGLYYRAISFNMGWNYGLKAFTA  
TILGGIGNIPGAMLGLLL GIVESLLSGYVSGAWKDV FVFIMLIAVLIFKPTGILGEKVA  
EKV\*

>SPSA8\_v1\_110027|ID:41145265| Amino acid/amide ABC transporter substrate-binding protein, HAAT family [Spirochaetes Bin 1 SA-8]

MIKERGMRKHAVFFSAVFGLMIFAVLAGCGTAQSGKTIKIALQAPITGDYAYEGQMAKQS  
VTVAELINKAGGVLGKQVEIVIVDDASNPKDSALAAQKAVS QKVVAVIGSYGSSVTEPA  
ADIYEKNKLVSVGYGCTAVRLTMDKERKFFFRTCGRDDAQGLFFGKYAVETMGAKRIAM  
HDNSTFAKGV ADEAKKALDPYIAEGKAEIVYFDAITPKEKDFSAAVTKLRETKPDVWYFT  
GYYPEAGLLIRQARDAGLTCPFIGGNAAINDDFV K IAGIDVAKGALMTQEPLVTDVSTPI  
AEQFKALYAEKYKELPSSWPVYAADALYGIVGAIKAGKADSTAIADVMHSMKMDGVEGV  
TGPVLFTERGDRKDV PYKMYIVDNEGKLVYYSK\*

>SPSA8\_v1\_110028|ID:41145266| SoxA1 (fragment) [Spirochaetes Bin 1 SA-8]

LMPRIESHPILAVEKTKKDVGF LFNGEAVRGLEGE PVSSALIALGFFEF SRHPKDSAPQG  
LFCANGQCSQCTVLIDGIPRKS CVTPLEEGMDVRTL KGLPVLPE TDMPLKQAERTIHTD  
IVVIGAGPSGLSAA YELGKMGFQVLLADDKEKLG GKLVLQTHKFFGSEEDCYAGVRGIDI  
AAILEEKLSRMPNVTILRNSPVVAIFKDRKAGIYKGYSSYLLVEFTALVVAAGAREKNIL  
FPGNDLPGVY GAGAFQTLVNRDLVKPARRILV GSGNVGLIAAYHALQAGIQVAGIFEIM  
GRINGYKVHADKIRRMGVPIHLNTTILRAEGEGK VSKAITAKVDDQFKPIPGTSREYEVD  
TILIAAGLASCDEF LRQAREYGILAVAAGDAEIEA EASSAMFGGRIAAFTLAKMLGKRAE

INPEWLPKREILKSRPGDTFSRSPVVPGPQWRPVFFCSEEIXX

>SPSA8\_v1\_120001|ID:41145267| conserved protein of unknown function [Spirochaetes Bin 1 SA-8]  
VVREDAVVDIGLYLVKAKDAEGNIYQAYFQVYDISDPYDVRINAANGNVFQNGNGTKNLT  
PEVWYGNTKIDITNYTFTWKLYDKNGKKSFGFIDTARTSAAKTISSHTTGSSAVFKISVAL  
SSAPSAGDVIRVISADGLKIESFEVASATTTAITIRAPVNGFSNNYPASTSDYAGGKLWL  
YTGNGATAGQKTTSGAAALAVTGDDIDGLGTVFCDAINPNV\*

>SPSA8\_v1\_120002|ID:41145268| protein of unknown function [Spirochaetes Bin 1 SA-8]  
MGVVSTGQLTLYDVNDPVSSQFVEIWDGDWASRWVNYAGSGEMSVATDSTLPSGALALTV  
GNNSGNDQTMIAKQKIPFDANKLYRLTFYVKRTAGTGTTYLGVAGVASNGVSLVNASGS  
NSYSSQHYYAASGVSPGSSWTKYVGYLKGTTASSGTTSDCPTPESPGKLHTNSRYFRPLVL  
VNYDSVAGTTVVGAVTVEIMPELSDIPNGNDTRNKAVATDSQLAAMANDSIITPQEKLLA  
LGRWCEWYNDTAATSALPTAPTDDGRYKRIVDSANAVSGWTPPTAGTASKAFYDALEALR  
AYLFSSPGVVLAVGTWNTNINITKATWTLWVTAESTAQALETEIAGKQGLTANLSNDSHL  
VPTDADGNNGNFAGCATTMSIYKMGVDDSANWTVAAASPSTGVTGSLSGKTYTVTAMSVDS  
GYVDLTASRTGYPSLTRRFTIAKAKGGAFFWLVSADAIQKSQAGVYTPSTITFTGKRSA  
SAGVIGDYSGRFIIAETDGSAYTDKYTSASNETSKTYTPSAGIKALRCRLYLAGGTSTL  
LDEEIIPIVVDGPTGPQGPTGPQGPTGPQGQAGQDAPRYLGLYSYANRGSITGMIAGDLV  
VLYSATQSERGIYAYVASTWTKQTPTQDQIMRCMVGLDAVRQGYGQSADYIGTGATSF  
ETLLVNFYIAQYAMITGSIRAGTRYDQNGTEVNPSQEGVWIGANGKIKGAINDVEPDQIT  
PSFTRRQLFALSGTWAVPAHVKWVRVTAIGGGGGGGGGSGGVDGSGDAITVYDGNNGGAGG  
ASSFGSYVVANGGAGGLGTGATGGTGGSGQNGASSDYIGGYNGANGGTGNTKGTGVTSGT  
SGAGGARGSSAGLYDASVQLSNASGALTKIPASAGASKSNSVTVPSTGTKTSNGATGKA  
GAYGGGGGGASGGCYACKLTDLTTGRGAFGAGGGAGALRQRTFKITEVYGQSITVTVGA  
GGAGGSAGGGTTALGAAGGKGGDGWVLEW\*

>SPSA8\_v1\_120003|ID:41145269| protein of unknown function [Spirochaetes Bin 1 SA-8]  
MRENSMRTKTNNMGGPVSFNEKISELELAHHELATVWVGDDKRDNGLRSRVNKMAEVEI  
PEIKTTISILQGCLDDQREKLETHIVAHKETRKDESTIRAERIKTYGAIVVSLIGNAATI  
ITVLLSRGK\*

>SPSA8\_v1\_120004|ID:41145270| protein of unknown function [Spirochaetes Bin 1 SA-8]  
MEVIKGGKITAGFTDKRPLSVPAEKRNHIHGAIADIAGGDGLVRSPVDGIAQGFIFRAPG  
GGWDHEKEKRLILDMPWREYFADIFGAIITIEERTGRLHILAHFWPEVVIDGSSKATVQ  
FQYDNYLETAKEDRFVSHILMTKRIEVEKGDILAPVGNAGFSTGAHVHWEIHHSTKRLDV  
FEKRVNPEDYL\*

>SPSA8\_v1\_120005|ID:41145271| protein of unknown function [Spirochaetes Bin 1 SA-8]  
MKGKKWQAWASMTFVLVSIYILTLVVAPDVLTSVGVSTIVGAIAFGAVGYGGVQVADSWQ  
RAKYRPELDKEEK\*

>SPSA8\_v1\_120006|ID:41145272| protein of unknown function [Spirochaetes Bin 1 SA-8]  
MNEKVKLCIVACLIGIILGASTATWIVGRNSARERAGYESTLADWERRNNELNNQLREAR  
ALDTERRKLDEERRVMDAEIERTLREGLGAISQARSDYERGLIQLRFAKDIFEVLRKRYD  
PAYHGAAPAVP\*

>SPSA8\_v1\_120007|ID:41145273| protein of unknown function [Spirochaetes Bin 1 SA-8]  
VSVPRDYQIIKRNGIYFRFRDPVTGKVLGKSSRLRNRDAAIAWAVHEYEKIKAKFGSS  
TNPYRDWAAKFFTSECPHISRLNEGKTYADSTRDDNRKYLEILLEDPIADIPLNEITRP  
DVVELQDRLVRKYGRTRKTQMLYSTFRITINEAA YRGKIPISPCAGLKQISYKKKPRQAL  
GKEDMEKFLSKENWDNETHWKMTMTARYTGMRAGEIRGLCWEDIDKAKKLIYVRHNL PQN  
VGIEGLTDPKWGKRRIPYTKELSQILESDRKKEGLVFNTDWPIDYWAWLDSVKDARKK  
SGAKGGIHALRHTINTELASNGVSRDIRKALFGWSNDATADGYTHAEMFEISSYAPLIEA  
TVSPDTPKPRRKK\*

>SPSA8\_v1\_120008|ID:41145274| putative Transporter [Spirochaetes Bin 1 SA-8]  
MKLWFKYLLGIIFGLALYAVVPRPMLSEGGFLAVLAETAARIGFYCVGAYLFSSLVVAIP  
KLFEEKRFWRLFLKGFALFYLGSLAASGLGILAA MVFLPLRIPFSIETPATNIPTPSNLQ  
FSIFPMNLVSLAANAHEYLLPLMLFAFALGLAIAHDPMAARPVFLFFDSLRSRIFHNINTF  
IHELLPVLLIPMTARALFDIEKPLSLTTFGSFVTVLALCTGFFLFIVIPAAFYFLSGKQN  
PLKSGYAILGAALASLISGNMRFSLGTTIYHVRENFGVKRRYNALFFTEGVFLGRAGTAF

VSAVFAAILSSYSRLGIPAETALWLLIFIPIATIIASAGLQNGPIMVLAILCSYYGKGF  
ENGFIIMIPAMAMLAMVANLLDTVWLSFSTICVARREIENNVKPLNHII\*

>SPSA8\_v1\_120009|ID:41145275| putative PTS IIA-like nitrogen-regulatory protein PtsN [Spirochaetes Bin 1 SA-8]  
MDLMTVLNPEMIALGLKGTTKLEIIDELIDVAVKSGKVS DPTAAKASVLERENRMSTGMK  
HGIAIPHGKTS AVQELVACIGVSEKPVDFDALDHQGCRI FIMT LSPPEKTGPHLQFLAEV  
SMLFRSEEK RQAILKAKTPEEIIINILKA\*

>SPSA8\_v1\_120010|ID:41145276|groS| 10 kDa chaperonin [Spirochaetes Bin 1 SA-8]  
MNIKPLGDRILVKMKESETKTASGIIPQTAQEKTQTGVVAVGTDADVIKVKVGDEIMY  
DKYAGTQVKIDGADHLIVKMSDILAVIE\*

>SPSA8\_v1\_120011|ID:41145277|ftsH| ATP-dependent zinc metalloprotease FtsH [Spirochaetes Bin 1 SA-8]  
MAGQKKDWKFKPPTTPNGKNGKDPQPTGPFGGFQFKFSIGYILTMLIAVSLFNYLIFRTD  
NTLVPYSTFKEKISSGEIKRVEIDLNYTGYDPDKNNEPSSPLPATAKTGAVFKTVPIDD  
PGFTALLDEKGVVYSASPREGSAVLSFILNWVLPFGIMFLVWRTVMKRFSGGNSNVLAFG  
QNKATIVAEGDIKTRFGDVAGVDEAKAELVEVVDLKNPGKYTDIGGKIPKGVLLVGGPG  
TGKTLARAVAGEANVPFFKMSGADVFVEMFVGVGAARVRDLFKQAREKAPCIVFIDELDA  
LGKSRVSGVMGGNDEREQTLNQLL VEMDGF DATSGLIILAATNRPDVLDPALLRPGRFDR  
QVLVDRPDMTGREAILKIHARNIKMDDTVDLAKIARSTPGFVGADLANLVNEAALLAVRA  
GRKKVNQDDFNAAIEKVIAGLEKKT VINPKEKQV VAYHETGHALTAALTKGADPVRKVS  
IIPRGFGALGYTLQIPLLED RYV VSEEELLSQIDVLLGGRAAEEIIFGSISTGAANDITRA  
TDIARKMITEYGMSEFRHVALTKRGLGFAGQSAADPFIAREYSEETQKYVDDEIAKTIA  
ARYDHLV LALLQNKRN LLEKIAATLLEKEVIEEAEFVALTKDEQTEQNPVDSLTA V\*

>SPSA8\_v1\_120012|ID:41145278| putative Na<sup>+</sup>/solute symporter [Spirochaetes Bin 1 SA-8]  
MSLFLIVYTLALLLLAFLSFRKKDSFQKYILADRNPQKFLIIASMLASTIGGGLTIGTVN  
KAFLIGFP AFWFV ASGSIAHLTQGLFLSEKVRKTEALTPDLAAKLSSPQVGRLAGIIIV  
LTWTGIAGA QFLALS KVVITITGLGHAE AIIAAAFLVIYTIMGGQRSILKSDFLQFGLL  
AISLIIAVVWLF TARPVSFPSLGISL FSPKFTPSDLLYLVVVAGSYLICPMMFGRILSS  
DSAKSARTAS FVSAAGMLLFAFVITAFGLWARASGFNPGSSDPLNAMISGVFPPI LGFLM  
TFGILAAILSTADTVLLTAASVLEHDVIQGD SLYRTQTWVGVVAFFAA FVALFQTDIVDL  
LLKTYQGYTSGIVPALFIAIALYGRRRVRPIFLFAAILSGYLLGFTGSFLPSPALQKGFA  
FAGILVSTLISLLGIERKPSPSQTN\*

>SPSA8\_v1\_120013|ID:41145279|fabH| 3-oxoacyl-[acyl-carrier-protein] synthase 3 [Spirochaetes Bin 1 SA-8]  
MSVVIRSIAS YIPEIRIDNNEL AARVDTTDEWIRSH TGIGARHIAPDGVL TSDMAALAAK  
SALEKAKISAREIDILIVATATPDYFGFPGTSCIVQDKIEAYGCTAFDIVAGCTGFIYAL  
DVASAMLEARQARNALVIGAESLSRVVDWSDRSTAVLFGDGAGAAVLSRIDEPRGRGCLSF  
ILGAEGSGAKDLYLVQAGRPNAFSRETPQTPVIFMNGKKVYDFAVKSITVLIERIMHATA  
YRLDDFAWIVPHQANARIVQAAGKRFKIPEEK FYLNMEEYANTS AASIPLALAE MDSKGL  
LKKNDLIMLLGFGAGLTYGAAVIRW\*

>SPSA8\_v1\_120014|ID:41145280|fabF| 3-oxoacyl-[acyl-carrier-protein] synthase II [Spirochaetes Bin 1 SA-8]  
MKKMIAVTGLGVISP VGNDIQSFWD SLINGKSGIGPVTRFDASRLDAKIAAEVKSFDPSV  
WMDKKEARKMGLFSLYAVSAAVQAWNDAGLPDTQDSMALLPYDRSRIATCIGNGIGGIEI  
FQDSFTKLLQSGPDRMPPMTVPLMIANEAAANIAMRFGINGPAYTQVTACSSGSDAIGQA  
IDLIRSGRVD AVVTGGTEGAITEFAMGGFCRLKALSTRYNDNPSLASRPFDKDRDGFVIG  
EGSGIILEDY EKAKARGARIYAL AAGYGGSCDAYHLTAPHPEGLQGARAIQLAMEDAGL  
SPEDVGYNAHGTSTEMNDPIETAMVKRAFGAAVKNLKVSSSTKSMTGHCIAAAGAIEAIV  
CIKAIETGILPPTINLDNP DVEAGCDLDYIPNKAIRHPIKAALSASLGFGGHNGVLAFT R  
A\*

>SPSA8\_v1\_120015|ID:41145281|fabZ| 3-hydroxyacyl-[acyl-carrier-protein] dehydratase FabZ [Spirochaetes Bin 1 SA-8]

MQNIEAYLPHRKPFLFVDDVSIDGELIRAKRQFHPDEWFFQGHFPA YPVVPGVLLVEMMA  
QAGGVGAKLLGIKPQSMFVFAKIRSAVFKRQVRPGDLVEMEITNIKSGSLILHQKGIGRV  
AGEVAVEAEWIAMASGVPE\*

>SPSA8\_v1\_120016|ID:41145282| putative reductase TDE\_0597 [Spirochaetes Bin 1 SA-8]  
MKLIPMVRNNICLNAHPEGCAQEVRLQINRVAGLASRVKTLGSAITRKPKNVLVIGCSTG  
YGLASRIVAAFVGYEAATIGVSYEKEPSPAKAGSPGWYANQTFDTEAQKRGLTAKSFNMDA

FSNEAKAKVIETARALGIQFDLVIYSLASPVRTDPTDGVMYRSVIKPIGREYTGKTADIF  
TGKISEAKVQPADEEEIRQTVKVMGGEDWARWISELSSAGLLTESAITLAYSYIGPELSW  
PIYRDGTIGRAKEDLEKTARKLRADFEKQNLKAFVSINKAVVTRASAVIPIPLYVSTLF  
KVMKERNIHEDCLDQMIRLYAERLYLNGLNSIPLDLEGRIRLDELEMGQAVQAEVASRLA  
SINESNLSSLADIEGFRMDFLRAHGFEVPGVDYDKEVESFQ\*

>SPSA8\_v1\_120017|ID:41145283| Ribosomal RNA small subunit methyltransferase E [Spirochaetes Bin 1 SA-8]  
MNMLFIASESDSTSGDITIPRADRYEHILKVLKAPGNEISAGSADGFLGKARILSVTK  
AEIRLSFQPEKPAEPLHPLRLILGFPRPIQANRILKDISSLGTAQIWLTVTELTEKSYLK  
SDIFANREFSPALIEGAEQAGNPRLPEVKTYWSLKRALDALDSLDRNAADKPGSAELSQ  
PSGCGTRIALHPDPHAVPISAVSLETPVTLAIGSERGWTEQEAALLQHHGFTICSMGTR  
ILKTETATVAAVSIILSKLNL\*

>SPSA8\_v1\_120018|ID:41145284|yjbG| Oligoendopeptidase F homolog [Spirochaetes Bin 1 SA-8]  
MAATIPSRHDVPEQFRWNLSALFPTDAAWETGLADLTAKIGTIEQLKNQFGADKAKFKEI  
LAFYSYMMLEERLGYAHLRMTEDEGNSESRGRFARYMGATQGGQAWAWFIPAIHSLD  
SGFISDCIQDKQFADYAVFLQKLLRFKPHVLSEKEERLLALQSEANQTAQETFGVLTNVD  
LDFGTVDTEEGPKPLTQSTFXFMRNXXDIRQKAYFQFYXAYEKHKNTLASLYAGSVKL  
DKYQAQVRNYASAREQALFPDNVPEAVYDNLVQTIHDNLPALHRYEYELRQKILKVDELRH  
YDVYVPLVEEKSRHTYEEAVDIVTEALAPLGDEYVSTLRKGLLGGWVDRYENKGRSGA  
FSAGSFCGEPYILLNYKEDVLRDVFTMAHEGGHSMHSWYSARSNPFLCYSYTIFFAEVAS  
TFNEQLVFKYLYERSNSEAERASLLANRIDDTLATLFRQTMFAEFESLTHAMAERGEPLT  
VDSLRSVYRKLQYFGPSMKLEDVSDLEGLRIPHFNAYFYVYKYSTGISASIALSERVL  
HGGKAELDDYFAFLKSGGSRFPIEALKVAGVDMATPQPIEMACQRFKDVETLGKLLGV\*

>SPSA8\_v1\_120019|ID:41145285| Transcriptional regulator, LacI family [Spirochaetes Bin 1 SA-8]  
MRATIKDIALRAGVSKTTVSFALNNPSRISKETYERIMAIVRELGYYPNPLARTLTTKRL  
GALGLLLPQPIAEVMGNPHLCEIISGIGKECDSHRISLTMLPPVQGVIEAARRSFVDAI  
VTIGVGPEHEVNVFFHKHNIPFVTIDGQETEDTINVGIDDESAAFALMNHILELGHKHIA  
ILCVR RDFKSISDINASIVLEKRLKGFSSRALEAYSLGLSHEGITVLETEGSLEGGKRALG  
AVLKSAERPTAIVAMADIIALGTYAAAQDLGIVPEQLSVAGFDDIPQGSYAHPTLTTIH  
QPSTEKGQVAASMALQLLDGKKVEHRRFSFRLEVKGSTARVP\*

>SPSA8\_v1\_120020|ID:41145286| AAA ATPase [Spirochaetes Bin 1 SA-8]  
MRQISISYDSGETVSFPVGVKASEAIAEIGKLPWPLAAVLVNNELKCLDTELESDCALPK  
VLVNSSLGAAVYRRSLCFLALASREVFPRRLIAGMAIGTGIFYHYFDERPLNENEIQQ  
LSDKMKDLVERDILINQEKWPWEKACRYFEKTGQSDTLALLENLNDPFIPLNECAGFRDL  
HVAPLVSSTAVLATWELLPHYGGMLLRYPHKETPNELEPFEDVPVLYRIAEEYKERGRVL  
GVGSVGLNKLNTNIGQIHEYVMVAEALQNKKIAALAESVARNADKVKVLIAGPSSSGKT  
TTAKKLAIELKVLGFPIPIELDNYFVDRTRTPLDREGKPDFECLEALDVEYLNQQLLAL  
FSGDEIELPLYDFKAGMRRSSGKMLRLMGNEILILEGIHGLNEELTPRIPRENKFKIYVS  
ALTQLNLDDHNRISTTDYRLLRRMVRDHNFRGHSQAATLAMWPSVQRGEQRFIFPFQNSA  
DAAFNSALDYELGVLKVFAEPLLRTIKSTSSEFAEARRIQSFLDNFIPIPAQYVPGNSIL  
REFIGESDFHY\*

>SPSA8\_v1\_120021|ID:41145287|oppF| oligopeptide transporter subunit ; ATP-binding component of ABC  
superfamily [Spirochaetes Bin 1 SA-8]  
MNNVILSVKNLEVXFKNGHESFTAVRDVSFDXYEGESFALVGESGSGKTTIGRTXIXINP  
ATKGEITFAGKRISGVKALDSYVIRNIQMIFQDPMASLNERATIDYIVSEGLYNFNLF  
KDENERREKVFKALNDVGLLEEHAERYPHEFSGGQRQRCIARVLAMEPKFVIADEPISA  
LDVSIRAQVLNLLRDLKQERGLSYLFIHDLTVVRYFADRIA VIHQGELKELASTDELFA  
RPLHPYTRSLLSAVPLPDPDVEKQKKLIVYDPGMHDYAKDKPTWREVFPGHFVQANEKEA  
AEYAAMYQ\*

>SPSA8\_v1\_120022|ID:41145288|oppD| oligopeptide transporter subunit ; ATP-binding component of ABC  
superfamily [Spirochaetes Bin 1 SA-8]  
MNYDIATPILKVRDLVVKFRVRNKELTAIRKISLDLFDGETLAIVGESGSGKTVLTKTFT  
GMLESNGRIDAGSIEFEGRELVKIKSDRDWETIRGVKIATVFQDPMTSLNPLKKIGVQIT  
EVIEKHQKLPKEEA YRIAVELMTKVGIKNAEKRFNDYPFQYSGGMQRQIVIAIALACKPK  
ILICDEPTTALDVTIQAQILDLRALQKDYGFTTIYITHDLGVVANVADRVAVMYAGQII

EYGTVREIFYDPRHPYTWALISSPLASRDEPLYAIPGTPPTLFNEIKGDAFAPRNRYA  
LNIDFEEPPFFXVSPTHFAXTWLLDPRAPFADPPLAVKLMRKKGNINYKEPAAEGSK\*  
>SPSA8\_v1\_120023|ID:41145289|amiD| Oligopeptide transport system permease protein AmiD [Spirochaetes Bin 1 SA-8]  
MAKTAERFAFATFDVLQSERIAGPRYSYWKSVFQTFKKSSIFWLLLLLTLTMMMSFIQP  
IVSGYDPAVSPNINKPSTWYLSPSGEHWFGTDDRGNLDWDVWVWAGTRMSLSIAFIASAIN  
IGLGILVGAVWGYSKRLDPILLALYNVISNVPAILRSMMLMYIFGRGFQWQILAMTITGW  
LGIAFFIRTQVMIIRDREYNLASRCLGTPIKRMVTRNLPYMVSVIATLVYQEIPGIINT  
ETVLSYLGIGLPSTYPSLGRMIDVYWSFVDTYPHMIVFPGLIMGLITISFYVVGQLFADA  
SDPRTHR\*

>SPSA8\_v1\_120024|ID:41145290| ABC transporter, permease protein [Spirochaetes Bin 1 SA-8]  
MKG YVLKRILQSILSIFIVSTLTVFLVYSCIPRQLVFKGDQQLPKLANKPDEYHDKFRT  
WENLGYIDYVTMKEYAQT VFGKDSPEVSDAIMQGSTFYEKFRADFQAKGYKVDIQPVTGY  
LYATKDIPTMTRVLK WYANLIQVDTPYRIKDPNNPNLKRGY YFTKDWSGMPALAASGTLY  
KYQIWLGGSFPIHXNIIKLNMGRSYPTYDGMPLVLEVIGSGQGRTLRREVTTKVNGEEVT  
FYTSIDEHSLKYKPELDRLDNRNKFDDNYADGNSIYNDPSMLGTSFTIGIYALLISLFFGL  
TVGVVAAMRKDRIFDKITMGYIVFISSIPTLLYIALFARFGMKVLGLPDKFPFLGSGNML  
SYILPTLSLSLGGIAGEALWIRRYMVDQMNADYVKFSRSKGLSQREVFFKHIIRNALIPV  
VHSIPMAVIGTLAGALITESFYAVPGMGKMFSSISDYNAMIIALTFIFTVISILAIFL  
GDILVTFVDPRISLAAKKEAR\*

>SPSA8\_v1\_120025|ID:41145291|aliB| Oligopeptide-binding protein AliB [Spirochaetes Bin 1 SA-8]  
MLKKIVLAVTLAAVLFAGTAGAATPKSKDYVYVFSTDP RSFNYLNDQRATNTQHITNFVD  
GLIEH DRYGILRPALAESWTVND DFTVWTFNIRKGVK WVTGDLEVYADVKAQDWVDAMKY  
MLDNKSQ LTYLIDGFVKNAGLYLKGKVTDFSQVGIKAKSDYVLE YTM EKPTPYFDTMLTY  
NAYWPVNGEFLKAKGKDFGKVDKNGILFNGAYVLSNFTSKSVIEYDPNPTYWDKAHVYIS  
HVKYVYYD GKDPDSL FNNFDAGVYVSAPVYTDNEALFARAQAKYKDYIFRARQDSTS FVY  
AFNYDRGAFASPADPTK GKTPKSEKAIEDTKKAILNRNFRKAIFFGIDRPTILAQRNGEV  
NKLA AIRNTYTAPELSSDKAGKDYVKYVEDALKARNPADFPASFKVDDAQDPY YNPTKAK  
AYMAKAKAELTAKGVKFPIELDVAADVS YTKGMKMDQSLKAGLEALFGTDTLKVNIEMD  
SDNYDASTYYAETGSQSNYDIGNTTGWGPDYGDPYTFLQTLEPVVGALLTPIGLDPVDEG  
TDKAAATAVGLYDYAKKVEAANNEYKDISKRFLFAEAEAQLLDDA IILPYMSFGGAFSI  
SRVVPY TAPRSAYGADEYKFKGVII GDKVVS LAEREKAKATWEKERA AEFKKNLAK\*

>SPSA8\_v1\_120026|ID:41145292| membrane protein of unknown function [Spirochaetes Bin 1 SA-8]  
MNRLSSKSPGTMGSIPLFIVLICGGVAAGLLFAAFQ QESSFRLAFSNAVLLVS FLLFGVS  
WILYLKKG DGVRRFFQPRRNPLSQSASWLDRTGAPGEVPQAPSPIPDASGPDSEAYQKLSE  
AEQKLRMRMLGANSQENEPNQA VKTSASLKHSLIAGFFLLLAGLALQYLLKF\*

>SPSA8\_v1\_120027|ID:41145293| membrane protein of unknown function [Spirochaetes Bin 1 SA-8]  
MEDQISFN SHAKALLLFLACAFFAVFATVDTSEHYRAWRTARKWTDEQKSAAPAQDANS  
MYSLILAALAVETSIIAISFIGALGLGIATSTESAKTYALARA FGWLSAGLGLAYTILMI  
YYQMRV GPRVVLKGPIFDYDL SMQIPILLA VIGYPATMAVYALFLYKKRVTRKD\*

>SPSA8\_v1\_120028|ID:41145294| NAD-dependent malic enzyme [Spirochaetes Bin 1 SA-8]  
MKLDMSLSNL SHAFPEDLSQDQKARAQTLFLK KLSEKAHRFYGGKMQTVPKAGLYGFNWF  
NVWYTPGVSKISTTIRDNND DSFALSNRGNLVA VVSDSTRVLGDGDCTPPGGLGVMEGKA  
FLMKYLGGVDSIALCVDSRDENGKHD PDKIIQFVKMLQPSVGA VNLEDISQPNCFKVLDE  
LRESCDIPVWHDDAQGTASVTLAGLLNALHLAGK KLQDAKIVLLGAGASNTTIARLITD  
GKGGENMVLFDTKGALHRERKDIESDTRYR KWELCLATNPGCVKTEAEAIKGADVLIAL  
STPGPDTIKREWIRSMAPKAI VFACANPVPEIWPYAAKEEGAFIVATGRGDFPNQVNN SV  
CFPGILKGALAVRARKITDGM AIRCAHSIADFARKRGITPDNIIVTMEETE VFAQEAA DV  
AMQAIKEGVARITDTWENVYNKALADIKESRKVAQDLMELGHIAPPPREMLDEALEEAIA  
EVRK\*

>SPSA8\_v1\_120029|ID:41145295| putative dihydropyrimidine dehydrogenase [NADP+], similar to dihydroorotate  
dehydrogenase [Spirochaetes Bin 1 SA-8]  
MAELSTWFMGLKLNPLVVAASGLTSTPEGVDKAVQAGAGAVVLKSLFEEQILAE LGSEA  
QGLDLDAYPDAAEFVSRTAWE EGTERYLDLVRKAKEKAQDIPVFASINCVGTGKWANFAR



EIEKAGADAIELNIAFMPFSTAASAKEIEEHILSTIKEVRLSTRLPPIEVKLGQQYSSLPN  
LAKSIAREQANALVLFNRFYKFDIDITGMKLTSAVVTSSPDEYHESLRWISLLFQRAGIE  
LSAATGIHSAQTALKFLLAGASTFQVCSGIYKNGWKVSVGMLDDLSALMDEQGFASVDAV  
RGRLSAHNAQKPEEYLRLQYIKALTGIN\*

>SPSA8\_v1\_120030|ID:41145296|thrS| Threonine--tRNA ligase [Spirochaetes Bin 1 SA-8]  
MAVDVERMRHSSAHVLAEAVLRLFPGTKVIGGPAIDDDGFYDFLFATPITNEDLPAIEKE  
MRRIIAGNHPPFVRREVSKDEARKLFADQPFKLELIEGLEEGTISVYEQDGFLLDLCRGPHV  
ETTRDIRPDAFKLRTIAGAYWRGDEKRPMLTRIYAYAFASKAEXEAHLKMLEEAERRDNR  
KLGKEXDLFSTHEEAGPLIYWHPKGGFRFRVELEKWWRDEHFKNNGYEILFTPHIGKSWLW  
ETSGHLGFYKGNMYSPTIDEEDYIYKPMNCPFHIMIYKNSTHSYRDLPLRWAEELGTVYR  
YERSGVLHGLMRVRGFTQDDAHICTPEQIEDEIAEVLRFSLAMWKTGFKQIKAYLATR  
PQDSVGEPARWDQALESLRKA VEKEGLAYEVDEGGGAFYGPIDLKIKDAIGREWQMTTI  
QFDNLPERFDMTYTDRDGQLKRPYMVHRALLGSIERFFGVFIEHYAGAFPLWLCPEQVA  
VIPVAPTFSYAKKIADDELKKRDIRAKAMLSDERMNAKIRDAQNQKIPYMLVVGQKEMEE  
NQVSIRYRDGRQENGVSFERFVGVLDKIATKALDL\*

>SPSA8\_v1\_120031|ID:41145297|clpS| regulatory protein for ClpA substrate specificity [Spirochaetes Bin 1 SA-8]  
MSSMNGQTDSDTTIVTQTEDHVPAEPDEYRVILLNDDFTTMEFVISVLMTIFHKSLPEA  
SKIMLDVHRKKGKGVGEYTYDIAATKINQVHLLARQMGPPLKCVMEKV\*

>SPSA8\_v1\_120032|ID:41145298| ATPase and specificity subunit of ClpA-ClpP ATP-dependent serine protease,  
chaperone activity (fragment) [Spirochaetes Bin 1 SA-8]  
MKVSQEVQAIENAAAYNEAKLSHEYLTPHELLYAGLSFEK VRLVFENCADADIDQLRRGLE  
AYFEQKVPVVRNNAEPVQTSFAQAVIERAVMQSQASGKSEVEVSDLIVSLYDEERTYAGY  
YLRKLGKRLQLLEVLVSHGIMDMPDEEEMIEGIDEAEGRQESEGKEKRSMPGPLERFAT  
DLTALAAQGKLEPVIGRETEIERTIQVLCRRLKNNPIHVGDAGVVGKTAITEGLAQRIVAG  
KVPALLKNYTIYSLDMGALLAGTKFRGDFEERVKKVVDVLLKKEKAILFIDEIHTIVGAG  
AVTGGSMASNLLKPAITSGKLRGIGSTTYDEYNKIFEKDRAXX

>SPSA8\_v1\_130001|ID:41145299| 50S ribosomal subunit protein L5 (fragment) [Spirochaetes Bin 1 SA-8]  
VRGGSLMAEAKTSLPRLKLYREKVAPELFKEMGYESFMQVPRLVKVVVSMGVGEAKENK  
KLLDAAVTDLGIITGQHAVKTKARKSIATFKIRQGQEI GARVTLRGDYMWEFLDRLMNVA  
LPRVKDFRGVXX

>SPSA8\_v1\_130002|ID:41145300|rplX| 50S ribosomal protein L24 [Spirochaetes Bin 1 SA-8]  
MTDSKFKLRREDLVQVIAGKDKGKQGKILKIDREKGRVIVAGVNMIIKAMKKKSQTD RGG  
IVEIEAPLHISNVMIVCKKCGPVKIGYKFDGDTKKRVCRKCGEVL\*

>SPSA8\_v1\_130003|ID:41145301|rplN| 50S ribosomal protein L14 [Spirochaetes Bin 1 SA-8]  
MIQVESMLAVADNSGAKTVQCIKVLGGTRRRYASVGDIIVAVKTALPNSSVKKGTVERA  
VIVRTHKEYKRPDGTYIRFDDNACVIIDANKNPKGKRIFGPVARELREKDYMKIISLAPE  
VL\*

>SPSA8\_v1\_130004|ID:41145302|rpsQ| 30S ribosomal subunit protein S17 [Spirochaetes Bin 1 SA-8]  
VDTDVQNKKKGLVLQGVVTSKMDKTIVVEVMRKLHPLYKKYVTRSKKVKAHDEANSA  
HKGDVVRVEECRPLSRDKRWRLIEIVEKAK\*

>SPSA8\_v1\_130005|ID:41145303|rpmC| 50S ribosomal protein L29 [Spirochaetes Bin 1 SA-8]  
MKNSFKELKYEELLAKREDLRKKYFDLRFQMVVGHVENPLEKRNLRQIARVETLITQAK  
KKLAGEQA\*

>SPSA8\_v1\_130006|ID:41145304|rplP| 50S ribosomal subunit protein L16 [Spirochaetes Bin 1 SA-8]  
MLIPKRVKHRKQQRGRIHGDAHCGNTIAFGELYGLICLEPEWLTNRQIEAARIALNRYIKR  
GKMWIRIFDPKPYSKPLETRMGKGPPEYVAVVRPGTVL FELAGVDAKVAEEAMRL  
AGSKLPVKTKFATREETE\*

>SPSA8\_v1\_130007|ID:41145305|rpsC| 30S ribosomal subunit protein S3 [Spirochaetes Bin 1 SA-8]  
VGQKVNPIGLRIGINKDWSSRWYVEPRDYAKTLHEDFAIRKRILELPEVKGADVAEIEII  
RHPQRVTVIIHTARPGVLIGVKGANIDKISLEIQVASKKVQIKIKEIKKTD TNAQIVAQ  
NIARQLEGRGSFRKTMKSAISNAIKGGAQGCKVRLSGRLGGADMSRTEELKEGRIPHLTL  
RANIDYGFYEAQTTFGKIGVKVWIYQGMVYASDKNEDAGMLAKKARREPAAQGAERREGG  
ERRPRRERQDTSRADDRARS\*

>SPSA8\_v1\_130008|ID:41145306|rplV| 50S ribosomal subunit protein L22 [Spirochaetes Bin 1 SA-8]

MVDNKTGYRATAKWLIASPFKVRPVADLVRGKPYTEALAILDNMPHKGARLIKKVVVSAASNGLSKNRKLDDEMLYIKELRIDE GPRMRRVWFRARGRADMLIKRMCHISCVVDEIGKKS EA\*

>SPSA8\_v1\_130009|ID:41145307|rpsS| 30S ribosomal subunit protein S19 [Spirochaetes Bin 1 SA-8] VRSVKKKGFIEKSLYKKVIDASKSGDKKMVKTYSRSTIIPEMVGGQTISVYNGKTWVPV YVTENLVGHKLGEFAPTRIFRGHAGSDKKAAC\*

>SPSA8\_v1\_130010|ID:41145308|rplB| 50S ribosomal subunit protein L2 [Spirochaetes Bin 1 SA-8] MGIRTFRPITPGLRHRVQVND EITNKS NPEKSLTKGKPSTGGRASNGRISVRHHGGGH KRLYRQIDFKRDKFGIPGKVTSIEYDPNRSANIALITYADGEKRYIISPKDLKVGQTIMS GPAASLEVGNALPLENIPAGFTVHNVELTLGKGGQLARSAGASALIAGYEGDYVVLK LPS GELRMVFKKCIATIGAVGNEEHMNERIGKAGRSRWLGIRPTVRGTVMNPVDHPHGGGEGR GKGYKQPVSPWGGQPAKGYKTRDPHKPSGRFITKRRK\*

>SPSA8\_v1\_130011|ID:41145309|rplW| 50S ribosomal protein L23 [Spirochaetes Bin 1 SA-8] MEYNSILIEPVLSEKSNLMRESGQYVFKVDSRADKLMIMEAVAKM FNVHPVSCNIINVAS KPKRLRGRPGRTAEWKKAIVKLQKGETIRVFEGA\*

>SPSA8\_v1\_130012|ID:41145310|rplD| 50S ribosomal protein L4 [Spirochaetes Bin 1 SA-8] MESKVISVEGKELRNLELSEAVFGLPVNEDVIWYAINNELANARVGTACTKDRSEVHG TN RRPYSQKGTGRARHGDTKSNVYVGGGISFGPKPRDYSYMMPRKAKQLAMKTILSMKAQDG TLA VVEDFTVETGKTKDLLKLSAVLNVKEPERTVLILKDDDPMLKRAARNLHWLTYLSY NRLRAHDLFYGRKVVVLESAAKLLNEMYAG\*

>SPSA8\_v1\_130013|ID:41145311|rplC| 50S ribosomal subunit protein L3 [Spirochaetes Bin 1 SA-8] MIGLIGKKVGMTQVFDASGKLIPVTVVQVVPNIVVGKKVADKDGYN AIVVGAYEKKKS RV LKPYAGQFPEGIAPARILREMRDFEKEVQVGEALDVS LLEGVRFVDVTATSKGKGFQGVV KRWGFGGGRSTHGSKFHREPGSTGQSTYPHKTFKNVKLPGRMG RERVTVLNLKVVRVDAE KGVVLRGALPGPRNCDVLRKAIKKN\*

>SPSA8\_v1\_130014|ID:41145312|rpsJ| 30S ribosomal protein S10 [Spirochaetes Bin 1 SA-8] MKDRIRVRLRGFDVRLVDD SASSIVKTVQSAGAKVSGPIPLPTRINKFTVLRSPHVHKKS REQFEMRTHKRLIDILEPTPEVMDALMRELPAGVDVEIKQ\*

>SPSA8\_v1\_130015|ID:41145313| protein of unknown function [Spirochaetes Bin 1 SA-8] VPWSLRAPSCHAQGMTDSL RPRKKQGIIAEKIKAV\*

>SPSA8\_v1\_130016|ID:41145314|tufB| protein chain elongation factor EF-Tu, possible GTP-binding factor (duplicate of tufA) [Spirochaetes Bin 1 SA-8]

MAKEKFERTKPHMNVGTIGHIDHGKTTLSAAITMYCGRKFGDKVMKYDEIDNAPEEKARG VTINTRHLEYQSVKRHYAHIDCPGHADYIKNMITGAAQMDGAILVVSAPDSVMPQTREHV LLARQVGVPAVMVYLNKVDLVDDPELIELVEEVRDLLNFYGFPGDKTPIIKGS AFKAMT EPDNPEATKSIQELLDAMDSFFPDPERLTDKPF LMPIEDVFSISGRGT VVTGRVERGIVH VNDTVEIVGIKPTRSTVVTGVEMFNKLLDEGQAGDNIGTLLRGV DKKEVERGQVLA KPGT INPHTKFKGQIYCLSKEEGGRHSPFFSGYRPQFYFR TTDITGTVNLPEGKEMVMPGDNTE INVELIYPIAMEKGLKFAIREGGRTVASGQVIEVIA\*

>SPSA8\_v1\_130017|ID:41145315| putative Elongation factor G [Spirochaetes Bin 1 SA-8] MAESQPVRNIGVLAHVDAGKTSITERILSLSGVKADAGSVDDGTTSTDYLSVERRHGITV KSAAVQFSWNGAPVNLIDTPGHVDFSNEVHRVLQILDGAIICALCAVSGVQARTEVISDSC KERSLPRIYFINKMDRAGADFSGLQDLRSSIEPAAVAIQLPVFSGRNWTGIVDLVTMRR VDCETGRSADLAGGNPAEKEILAQAVAA RQKLAEAIAEHDETILALFAEDKDIPNELLAE SLKELTWKSVLVPVCGSAFN TASVALLLDASRLYLPDYRHARVPDCHSPDSNQPVRLKP ALEETLAAFVFKTTADAEQKTF SWRLWAGALQPGASALNSQTGKIVHLK KLYSIQASEV LEVSRAQAGDIIAIDAGL ASPGATLCAKHRPLFF EELRIPPPVVVQILEPMDIHETPGIR KALHHLAREDA SLIVRDEADTGRFEIAGQGELHLQIIVERLYRDFGFKVRTGNPRVTCKE RPKKAVSVSEGFDRDFGGARIRTSISLNLEPCVDLAGNTMVFAPELRLPAPYREAVLRGL EAALSVGPNEGWPLVNAAITITHLIPPDQNSGRNGETAVEAASAMACRKALLNSDSV VLE PVMETAIECPEDCFGQVLALISNRQQIDSVEDGISRKHITRITMRMLFGFSSDLSSAS QGHAQFQARFIGYEPRR\*

>SPSA8\_v1\_130018|ID:41145316|rpsG| 30S ribosomal subunit protein S7 [Spirochaetes Bin 1 SA-8] MGRKKKTIDRGHQPDSRYNSVA VTKFICRMMWQGKKSICTRIVYDAFEVMQA KSGTPALD

VFNKALENAKPVEVKSRRVGGATYQVPVEIRETRREALAMRWLINASRSRSGKAMA EKL  
ADELLDAYNNTGTAIKKKDDMHKMAEANKAFAHYRW\*

>SPSA8\_v1\_130019|ID:41145317|rpsL| 30S ribosomal protein S12 [Spirochaetes Bin 1 SA-8]  
MPTINQLIRLGRKPNVWRTKAPALMECPQRRGVCTRVMVTPKKPNSALRKVARVRLTNG  
IEVTA YIPGIGHNLQEHSVVLVRGGRVKDLPGVRYHIIRGAKDTLGVEDRQGRSKYGA K  
KPKA\*

>SPSA8\_v1\_130020|ID:41145318|rpoC| RNA polymerase, beta prime subunit [Spirochaetes Bin 1 SA-8]  
MRDIQDFDSISIRLASPEMIRAWSYGEVKKPETINYRTLPERDGLFCERIFGTTKEWEC  
YCGKFKSIRYKGVICDRCGVEVTHFRVRRERMGHIELACPVSHIWFYRSVPSRMGLLLDL  
SLASLSILYYEKYIVIDPGETELKKMQILTEEEYIAAQDRYGGAFAGMGAEAIRSLLQ  
RIDLDKLAELREKMVAKGPKSDRRLKRIEIVESFRNSQNKPEWMILSVIPVIPPELRP  
MVQLDGGRFATSDNLDIRRVINRNNRLKRLQNLNAPEIIIRNEKRMLQEAVDALFDNTK  
KKRVVKGASNRPLKSLSDMLKKGKQGRFRQNLGKRVDYSGRSVIVVGPPELKMWQCGLPTK  
MALELFKPFIMKKLVEKD VVYNIKKAKMLVESETPEVYAVLDEVVKEHPVLLNRAPTLHR  
LGIQAFEPILVEGKAIKLHPLVCKAFNADFDGDQMAVHVPLTNAQAECWTLMLSSRNLL  
DPANGKTIVYPSQDMVLGINFLSRPKKGVKGEKRYSSSEELLACESDACDYQAEVKIP  
APKNLVWNKLNQVSTLPPNRVISTTAGRVLLNEALPAEIPYINYSLTDKDIRALIEVVYK  
FHGPFITVNMLDAIKDMGFRYATFFGATISMEDIVIPA EKAQMIEDANKQVESIQKQYIA  
GHITQDERYNRVVEVWSKTNEELTAVMMKTLEKDKDGFNNIYMMAYSGARGSRNQIRQLA  
GMRGLMAKPSGDIIELPIRSNFREGLSVIEFFISTNGARKGLADTALKTADAGYLTRRLV  
DIAQDMVVNIEDCGTINGAVHTALKDGEEIIEPLRERIIGRFTLDPIKHPITGDLIIDS N  
QEITEEVANAIDAAGIEEVTIRT VLTCEARYGVCQKCYGRNLATGRTVEIGEAVGIIAAQ  
SIGQPGTQLTMRTFHIGGAATKASEENRIYLKYPVLVNRIEGSYVPTKDDTYLFRTRKGYV  
YVSRIFFKTEFSKGD TLLVQD GARILKGS AIIRRKDGTEVVATDISYAKILGSLLLLIAQ  
EQKIEVRNGSELLPKEGQIVAA NETLAVFDPFADPII SEFDGYVRYEDIIPGSTLKEEIN  
EETGNIK KITEFASERESKQPRIIIA DEAGNEIFAYLLPGGAYL NVEDGEVIKAGKTLA  
KTLKESAKAMDITGGLPRVSELFEARKPR SIAVLAMVSGKVTIKGNVKNKRIVVITDKFG  
KEYKHLVPMGRLLVRDNDQVEAGELLCDGNKNPHDILNILGEQACQRFLMDEIQQVYRL  
QGV TINDKHIGVIVRQMMKKVEIVSPGDTRFIFGQQVDKYKFHEENERV VKEGGQPAVAR  
PMLLGITRAALKIDSFSAASFQETTKVLT DASIAGAVDSLRLGLKENVIIGHLIPAGTGM  
RDYKGIKMSDAEHEDLDAFVEDILEKRKR EKEMAPFPALED RADASSSFEESVFENDAG  
FEQVSEDEE\*

>SPSA8\_v1\_130021|ID:41145319|rpoB| DNA-directed RNA polymerase subunit beta [Spirochaetes Bin 1 SA-8]  
MAYTKNKIQRRIYIGKDYQEAMDLPDLIDIQLSSFERFLQREKL RNGEPLDSVGLQEVFEG  
TFPIESQSGDMVIEFERYNLDESAIKYSELDCQKQGLTYSIPLKATVNLVFQKTGEIRQK  
EIYLGDIPLMTDRGTFIINGAERVVVSQIHRSPGVVFSHEKGVFSSRLIPYRGSWLEFEI  
DQKKELIYTKIDRKKKFLGTLFLRAIGFTTREEIIEAFYKTKTIELSDLEAAKEQLVGKV  
LAKAVYIEFDNEKKKLF RAGEKLLHLHEVDELGNL GIPSV EIIDFDHPDSMHNEMILHCFA  
REDVKLEKETS DQDEPSKADALS AVYATLQPGEPITVDGAERDLMSMFFSSRKYDLGKVG  
RYKLNK KFN YAVPVQEYTLTKADIVATMKHLM DVYYGEAYVDDIDHLGNRRVRSVGELLA  
NVMKSAFARMERIAKERMALKETETVRPQDLISIKPIVA AAIKEFFGSSQLSQFMDQVNPL  
AELTHKRRLNALGPGGLSRDRAGFEVRDVHYTHYGRMCPIETPEGPNIGLIVSLATYTTV  
NDYGFLETPYRKVKDGIVTNEIEYLSAIDEDRY YIAQASARIDTAGNFLDSTISCRHQGD  
YVMQTPKDIQYMDVSPKQIISVSASLIPFLEHDDANRALMGSNMQRQAVPLVFPEAPRVG  
TGMEWKTA YDSGVLV KAKRSGVVKFVDASKIIIKPD TMDPLDED TYILVKYQR TNQDTCY  
NQRPIVQFGEKIMKGQVIADGPATNTGELALGRNILAGFVPWNGYNYEDAILISQRVVKE  
DMFTSIHIKEFQTEVRETKLGP ERITRDIPNISEKILDNLDGDGIIRVGAKVKSGDILVG  
KVTPKSDTDTTPEFKLLNSIFGEKAKDVRDSSLRVPHGIEGTIIDIQRMKRSANDDLSPG  
VEEVVKVLIATKRKLKEGDKMAGR HGNKGIVARVLPVEDMPYLEDGTPLDICLNPLGVPS  
RMNIGQIMETELGWAGSTLNEWYSCHVFQSPSQEQIAEKLVEAGLP GSAKVKVRDGRTE  
TFKNDVTVG VVYFMKLHHLVDDKM HARSTGPYSLVTQQPLGGKAQFGGQRLGEME V WALE  
AYGAANTLQELLTIKSSDMTGRAKVYE AIVKGE PHTAAGIPEAFNVMVQELRGLALDIRV  
YDAK GKQLALTERDEDIINKNTGAF\*

>SPSA8\_v1\_130022|ID:41145320|rplL| 50S ribosomal subunit protein L7/L12 [Spirochaetes Bin 1 SA-8]

MAALTKDQIIDAIASMTVLEISELVKAMEEKFGVTAAPVAVAAAGPAAAAAPVVEEKTEF  
TVILKGGVPADKKIAIIEKVRITGLGLKEAKDLVEAGDKPLKENVSKEEAKEVKKQIVD  
AGGAVEIK\*

>SPSA8\_v1\_130023|ID:41145321|rpIJ| 50S ribosomal protein L10 [Spirochaetes Bin 1 SA-8]  
MAMRATKLQPSKVEAIQMLKEMIQGSNDYVFAEYRGLTVEQITNLRKQLREKGAELHVVK  
NNFARIAFEELGYTKEVAPLLAGPTAVTFVKSDSNDVAKVLLDFAKEVPALTIK GALV DK  
GFMDKAQVEAFSKLPGRGQLIAMLSAMNAPAQNLVYVLNAIPTKLVRVLKAIEEKKAQE  
A\*

>SPSA8\_v1\_130024|ID:41145322|rpIA| 50S ribosomal subunit protein L1 [Spirochaetes Bin 1 SA-8]  
MKHGKKYIEASKKVDNRNVELEPVAACALLKDIKFAKFDETVEAHVRLNLKKSQTVRDTVV  
LPNQFRGEKRVL VFCKPERVKEALEFGAAYAGDAELIEKIKGGWLDVAVATPDMMKDV  
GKLGMLVGRKGLMPNPKTGTVTNDLKSALNELRKGRTEFRSDKTNIVHLAIGKASMEAEK  
IAENLMALLEEINRKRPSDVKGDFITSIFLASTMGPGVRVAVAKNEKR\*

>SPSA8\_v1\_130025|ID:41145323|rpIK| 50S ribosomal protein L11 [Spirochaetes Bin 1 SA-8]  
MAKKKITAIVKLQCPAGKATPAPPVGPALGPHGVSAPMFCQQFNERTKGMPEGLVIPAI  
TVYQDKSFTFILKTPPASVLIKKACGVEKGSVPVPHKQKVAKLPNDKLEIAIAKQKLPDLNA  
NDIQAAMRIIAGTARSMGIETELKK\*

>SPSA8\_v1\_130026|ID:41145324|nusG| transcription termination factor [Spirochaetes Bin 1 SA-8]  
MGKSWYILHVYSGYENKIEKTIRMLLDTGEISKDIVTDIKVPTEEVTDVKDGKKKTVTRK  
ILPGYLLVEMDLPDNGWKAPCSAIRKITGVTGFVGSNLSSKPQIPSEEVRILQRTGEL  
KGDQTIRMKQSYAPGEQVKIIEGPFESFSGVIEEVNAEKNKLKVMVGIFGRSTPVEVEMT  
QVEKV\*

>SPSA8\_v1\_130027|ID:41145325|secE| Protein translocase subunit SecE [Spirochaetes Bin 1 SA-8]  
MKKLIQFFKDSYAELAKVWVWPSKEDVISSTKVVVISTVVFVALLLGLIDFLLVMGIEVVFR  
\*

>SPSA8\_v1\_130028|ID:41145326| 50S ribosomal protein L33 (modular protein) [Spirochaetes Bin 1 SA-8]  
MRGGLLVGYRERTENMASKKQTVEIIALQCTECKRRNYTTKKNRKTMQEKLELMKYCKWD  
RKHTLHKETKVK\*

>SPSA8\_v1\_130029|ID:41145327| Protein MurJ homolog (fragment) [Spirochaetes Bin 1 SA-8]  
MFPFLALVSFAALLQGILNSYGIFAPSGFAPILFNLCFIIVPVMVSSLTANPARAMAIGV  
VAGGFAQALCQLPAVLKTGSKFGFIAPRKAFKNAGMRKVFMXIAPXILGMXXYQINDXVS  
XAFASRXGLGTASSLQYSLRLQELILGVFAVSAGTVLLPSLADAVKESNWLAYSSRLGRT  
LQSIFLATIPVTVFSMIANTEIVTLLFKWGSFSEESVRLTASAFFWHQTGLSFIAANRII  
APAFYARSDTKTPTFAGIASFAVNXALVMLLSYPFKGPGIALALSLSLVNTILLVTMLI  
RTKTAGIAEEFAKSARYALKLLVFSIASGAVILALRVPLLSLFAGRGRLLVSAGLPLIIMT  
LLYAGFGIAMLALS KDPLALSIVKAVRKRFSKNEKQRS\*

>SPSA8\_v1\_130030|ID:41145328| protein of unknown function [Spirochaetes Bin 1 SA-8]  
MPAGEPDKQSLNLKESLQNERPGLDNHEKKMIRDAGVLSVLTMISRVLGLVREMTKARF  
LGTGMLGDAFTVAFIIPNFMRRLLFAEGSVSVAFIPTFKGYLHEDDRKATEEFLSASLTVL  
TPDCPDHSGKQHCRAHGCLRSLDRKSFWF\*

>SPSA8\_v1\_130031|ID:41145329|ltaA| L-allo-threonine aldolase [Spirochaetes Bin 1 SA-8]  
MNKIDLRSDTVTWPTTEEMRTAMASAPVGDDVYGDDPTINKLEELAARMTGKEKSLFVPSG  
TFGNQLALFTWSPRGSEIVCGEQCHIIQHEAGAASVIAGVQTRMMPAPDGIMPVAAIEAR  
IRGNDIHYPTSLICLENHSSGRVISLSYMREVSALARSHGLPVHLDGARLFNAAEALH  
VEAAEIAAEVDSVMFCLSKGLCAPVGSMLAGPAHFIEKARKKRKIMGGGMQRQAGILAAAG  
IIALEKMTRRLNEDHRNARYLAQKLA AISGISVELDALDINMVFFKLPDGIDGQNFASFL  
ASRGVLINPPEAGYCRFVTHYWIKREQIDTVVELISNFIAEK\*

>SPSA8\_v1\_130032|ID:41145330| Cof-like hydrolase [Spirochaetes Bin 1 SA-8]  
MKIRLIALDLDDTLRSDLTISAGNRKALVNAENAGIEIVLASGRNYISMREYARQLGLD  
RPGNFLICNGAETLAAESGEIIEQLRLSXFCHAASSEIESRGFPWQVYQDGKIFCSXI  
NPWALRDKHLTSQPVEKVEDKQALFRNGQIKFVIPGEPEKIAELYAEFRMLFSDQAEVVT  
SKPYFLEILPKGADKGQALGR LAEKLKIPMKAVMAIGDAMNDLGMIEAAGFGCAPANALA  
VVKASARHISQRTNEEDAVADLIYSVAL\*

>SPSA8\_v1\_130033|ID:41145331| Peptidase M15B and M15C DD-carboxypeptidase VanY/endolysin [Spirochaetes

Bin 1 SA-8]

MNRGAIFTIICIMALMSCGSGSAQTQQKQNASSQAINAALTALEQSEIQPEDKKNILAAI  
NKSQPRFTEILAAITETVKQDSALLLRVDKGGKGLSETWEPDLKLLDKTGISIARAGLSL  
RAPALIALQEMNKKALAEVTLVSSAYRSYNYQREVFARNVKELGEAEASRV SARPGSS  
QHQLGTAIDFGSITNDFARTKAGAWLAANAGRFGFSLSY PQGLEQLTGYQWESWHYRYIG  
KDAVALQNEFFSGIQHNAMLFLDAFFAIMPPSK\*

>SPSA8\_v1\_130034|ID:41145332| conserved protein of unknown function [Spirochaetes Bin 1 SA-8]  
MTEGQFTEFCIRDEFRAVYDELSARASSWLLPLQEELRQLQGYSDYSVETPVVYNRALD  
DVQAGDDIRFIIVADNPGKNEQLGKNQRYLVGQSGKLARSWFKAELGLDFERQAIINKT  
PIHTPKTAELRLLRKLADQRPTEFDVLLAGSQRKRMADFAFRLHVCLDCYLWISGYGELAG  
RGLFKPWAEALSGYYQKKSDDIKRKVLVFRHFSMNQFAIEYKSNQAGLPVIGKLEAIGQA  
NRRRILGW\*

>SPSA8\_v1\_130035|ID:41145333| putative Acetyltransferase, GNAT family [Spirochaetes Bin 1 SA-8]  
MTMEIAAFNLDQEGRIRLATPKDSHAIAQLRMNFLEQIKWFSEERQETFASQKTMFEEG  
IRNGSMQVMLFEQNQTVAATSALRKLKSLKTGSGAQAEALLAVYTRHEYRKKGIASRLVEAT  
IDEARRSGFKTLVLQPTEDSFELYRKFQFIGTARHMSLAMQNQGGPRNGTPA\*

>SPSA8\_v1\_130036|ID:41145334| conserved protein of unknown function [Spirochaetes Bin 1 SA-8]  
MKNDNNQLKLAVLIDADNTQATIIIEGLLAEIAKYGVASVKRIYGDWTNTNLRSWKDKLLE  
YAIQPVQQFSYTSKGNSTDSAMIIDAMDLLYTENLDGFCIVSSDSDFTRLAARLREDGKL  
VLGFGQRKTPKPFVAACDKFIYTEILRESDEEKESKSEKDAQVKSQNDIKTDHRIKALLV  
SAVEDAADEFGWAYLGAVGTYIANRQPEFDPRNYGFRKLGDLIKASALFEIDERANPMDP  
GKQVYLRLLKAKTR\*

>SPSA8\_v1\_130037|ID:41145335| protein of unknown function [Spirochaetes Bin 1 SA-8]  
LLKIAELRSAAQIWSFEITRESAKKAFAGYAASGILDELANLAQGSVPEMLAMTLESWE  
REHVSLRIMKGYVVSFDDEMAGILEAGKAFDNLRVTRLAKNLVFLDNHQAKLIPEILGKI  
GLPIPPVMTSSGSDHGKPLLPALRARASALSNTVRNYAGSSEFAIDFDRQCEQEKLPLP  
KDSLRLRQLLEELSAMETSDRIRSVLEERIRKLIISAEQLQMLKADMEHDERLGRAMNG  
GHSAEGLNFQGKLHIKALKNKARLTVQWISEGRELKTMPASLEKTDKDYLLTGED  
LASHSPLTLRVGTIRYLALSEGIIS\*

>SPSA8\_v1\_130038|ID:41145336| protein of unknown function [Spirochaetes Bin 1 SA-8]  
METLKPENSQWRSAMKMEKRNKALVRNYLQPGPDEASPEKLVSQLAEYLQKTETQERI  
IALDDDFDLVLIGLVLLKGSLSRQDAILLRGEVSEYELDFRLDSLVERLVLYLEKDAIY  
NLTPFFKQPLLFRWTIQDLVFGTHHSGNGPAESRYSLQDLFISAAFIVKFEPFLFRKNGQ  
LTARAVTKLQQYFKTDEQAPEIITIIADFEQKSFLSRKDHSAQLNEDVFARFLDLSAAN  
NPLSLVLTYPPEISTALLPFLSHAFRFSGKGLMRFLRLAIANSIKIDPSEIVEKLTRFG  
LLLKDNDYICIAQRARMRGIKKKKKKRRGA\*

>SPSA8\_v1\_130039|ID:41145337| Helicase domain protein [Spirochaetes Bin 1 SA-8]  
MQSSGPLIVQSDMTILLDVHAPDAEPAREALGAFAALEKSPEHLHQYRISPLSLWNASAA  
GLRPDEVIESLEKFTRYEIPRDVPFIIRDVTMSRFGALVREASEKDGRGSDFLHLHCRDE  
ETRTRISDQKLAKWLVPPGKKFLLRLVDRGTVKVELLKRGYPVKDEAPLLEGSVLEIAL  
KFEKPDGTRWVLRPYQDEAVRAFLGGNKPGRYNYGVIVLPCGSGKTIVGMAAMVAIRKKT  
IITNIVAVHQWRNELLDKTNLEREQIGEYTGAAKEIKPVTIATYQILSWRPDKESDFPH  
FDLLRKQDWGLVICDEVHLLPAPVFRVVAEMQAVRRLGLTATLVREDGREGEVFLIGPK  
RYDVPWKILEKKGFIAEAFCKEIRVPMDDATRLSYAVAERGRKLRIAAENPLKDDVVRFL  
LSHHRGESILIGQYISQVSRYAALLDAPLITGTTTPDSRREELYDAFRRGEIKVLVTSKV  
ANFAIDLDPASVAIQISGTFGSRQEEAQLRGLRILRPKEQNSFFYSLVSRYSVEEYADNR  
RKFLVEQGYRYSIEAWE\*

>SPSA8\_v1\_130040|ID:41145338| Glycerate kinase [Spirochaetes Bin 1 SA-8]  
MINMFEKSHYDARNDAEIFRAGVDRVNPLKLLDVTALGTGKVLTVKHAKGEERYSLDAY  
RHIVAAGFGKASAVLAEGLERKLAGMVEEGIVVTKSAETAQCATIKILEAGHPVPDERSV  
SAAHKILSLAAKVREWERKGEHCLVIMLVSGGGSALLCAPLPGISLQEKALATKLLLGSG  
ATIQEMNAVVRKHL SAVKGGKLAFAFAPAEILSLVLSDVIGDDLDAIASGPTVPDSSTWQT  
VLSVLIARNVMDQMPPSVRDMVLKGVAGKIPETPKLHSLDSEPSFFNNTKTVLIGSNMLA  
LQAARCKAEALGYKTFLTSRLTGEARETARLFPALASDIAEYGIPVTKPACLIAGGETT

VTLRGNGLGGRNQEMALAVLTLDDNKPGRNAVFLSAGTDGNDGPTDAAGAFASMELKM  
AAEKQGLSALEYLQENDSYHYFEQIGGLLKTGPSGTNVCDMQILIVP\*

>SPSA8\_v1\_130041|ID:41145339| putative Tetratricopeptide TPR\_1 repeat-containing protein [Spirochaetes Bin 1 SA-8]

MQSFISTLWERFGLNAYIRGDYKAERWFRKLEQREPDASVLRNLGVILLARGDAEGAE  
SYLLREEKLYGKSFHRHAGLADIAYARGKRKEAERRYALALQEPECQPPGGKAEASRSLLE  
KRLSICSSDAFARSRESMKIFREAEELSHEKKYEEAVLKFKESAALDETNPALNAGS  
ICLNQLGRNREAQEFFEKA FEISKNIQVARNLDLVMRKNSKELK\*

>SPSA8\_v1\_140001|ID:41145340| Glucosamine-6-phosphate deaminase (fragment) [Spirochaetes Bin 1 SA-8]

VPRLKAFHAIAGDAADLSAEVKRLGDVSKATIDVAFVIGENGHLAFNDPPADFENEQP  
YLIVKLDQACRQQQVNEGWFPSVEATPDRAISMSVRQILKSRCIINTVPDERKAKAVAAC  
LGGEVSPLHPASILQLHPECYTFLDTASASLLFGRTSRGGGQ\*

>SPSA8\_v1\_140002|ID:41145341|gpo| Glutathione peroxidase [Spirochaetes Bin 1 SA-8]

VDQNKLYEIEFKKNDGTVMNLAGYRDKTLLIVNTASKCGFTPQYKGLEALYKKYAARGLV  
VLGFPCDQFAHQEPGSDADILQFCQINFGVTFPLMAKIEVNGPGAHPLFAELRKRTGGLL  
GNSIKWNFTKFLISPGATVIKRYAPSVEPEKLEKDIEELLASTPAGSSK\*

>SPSA8\_v1\_140003|ID:41145342|ziaR| Transcriptional repressor SmtB homolog [Spirochaetes Bin 1 SA-8]

MNTVHDVVELCTCTEVHPEAVAQARKGELPVPQLLSMSELFKILGDPTRLRIVNALAKDA  
ELCVCDLSRALDKTQSAISHQLSLLRRARLVQYRKEGKVVYYRLDDDHVERLVSIAAQHV  
AEQRSDVL\*

>SPSA8\_v1\_140004|ID:41145343|ziaA| Zinc-transporting ATPase [Spirochaetes Bin 1 SA-8]

MKDTCCSSGTCAVDVATIKPVGYTLSQSQKELVLILTALLFAVTGILLWEWTGRDPQGL  
APRGLGIAKAAGVFFLVLSYILAGA EVLKGALKNILKFQPFDELFLMSIASLGAFAGAM  
EEAVGVMVL YRFGEFLQDVAVTRSRQSIKALLDLKVEKARVQQDGQWQEIESSQVKVGD  
VQVRPGERVPVDGEVVEGSASFDTAAMTGESLPRLAEAGSEALAGFIVSGGAVVIRTLRQ  
AKDSAASRIIRLVEDATRSKAKPELFIHRFALIYTPIVVFSALAVAVIPPLGFPGQSFSL  
WLYRALTMLVISCPCAFVLSIPLSYFAGLGGAAARKGILIKGAAVLDLANARSVVFDKTG  
TLTKGVFTVKNLYPAEGFSADDLVYHAAAAGSASNHPLSQAIQRFYNSQKKNHSGFPKDA  
RFTEIPGHGSVALLDGQEILAGNDRLLHLKNIPHQCEAADETVIHVAVAGTYAGKIELGD  
SIKDDARPALQELQQLGIKDLAVLTGDSEGPAKRTAFELGDIAVHHSLLPEDKLAKVDEL  
LKAYENRGSVIYVGDGINDAPVLARS DAGIAMGGIGTDAAIESADVLMTDEISRIPQLI  
SHARKTKRIVLQNILFALGFKVAFLLGALGIATMWEAVIADVGVALLAVLNATRALLR\*

>SPSA8\_v1\_140005|ID:41145344| putative enzyme [Spirochaetes Bin 1 SA-8]

MAESCIRVDSLFRYENGGQVLSNISFSLSRGSAVALVGANGCGKTTLLWLIAGLFEAES  
GSIYIEEILLNRRNRTLQKKLGLAFQNPDDQLFMATVQQDVEFGPRNFLLPEQEIQHRA  
REAMHRTNCLHLADRPPYRLSGGEKRMVSLATILASDAEILLLDEPTNALDPRARRTTIN  
LLRSLPHTKLIATHDLDMLVLDLCDEVILLNHGTIAAKGPSREILSNGPLLEAAGLELPLS  
LQG\*

>SPSA8\_v1\_140006|ID:41145345| putative Cobalt ABC transporter, inner membrane subunit CbiQ [Spirochaetes Bin 1 SA-8]

VTTSTKQGYRFRRFEEFACISSRIHQFHPAVILLAAFSYITLLTSFPATAVIELAPYFLF  
PILLAQFARIPLKPLFASTLKVLP MILLIGFLHPFLDKELAYHGSMELNRGWFIFISLML  
KGFLTILMNFLMISILGIGGLQKAMKSMKIPPLFFMLFTLIYRYIMLLLEDLYRTL RAYE  
LRSGRKPRLTRNEWGSLPGGILIRTYEQGLRVQHAMELRGFNPAHPYGSVQKLSIPDIVF  
IMLWLSLVVLFRIYSLPEVLGSVLVAFVFCGEGAGLGVLHG\*

>SPSA8\_v1\_140007|ID:41145346| Cobalamin (Vitamin B12) biosynthesis CbiM protein [Spirochaetes Bin 1 SA-8]

MHMADALISPQVGAALWIATAATGAYCIKKVQHDECETPTALAGILGAFVFAAQMINFSI  
PGTGSSGHIGGGLLSILLGPHLGFLAMSAILLIQALFFADGGLLSYGCNVFNLA FYTCF  
IAYPLIYKPLAKKEKRSKAAIVLASVAGLQLGAFSVVLETLLSGKTELPGTFILLMQPI  
HLAIGLVEGLLTA VIVGYVQKTAPQLIRHTERIPENDKAATVRQKIMALFILAAALITGGL  
ISWFASENPDGLEWSIAKVTGSTELSSASSTHALFSAIQEKIAILPDYSFKASETSSGQS  
ASRFGTTFSGITGALLTFVLLLLTNLGIKTFSWRKKPVPVGSTQRDNLD\*

>SPSA8\_v1\_140008|ID:41145347| Hydrogenase expression/synthesis HypA [Spirochaetes Bin 1 SA-8]

VHELGIMMHIVETVEAFARDQGV EHIKTLVLQVGELSPVIPQYLRACYPAAVDGTSMQDT

ELEIEIVPGNGVCSECGKVYNLVTYNKHCPVCDSTNAEIIISGREFLIKEIVAS\*

>SPSA8\_v1\_140009|ID:41145348| Formate dehydrogenase-O, major subunit [Spirochaetes Bin 1 SA-8]  
MARDKILDLANKISKTKRGSKNEIKPEYPEYQILDPIVTDEMADVALQVEFRKPKQSAEEI  
AARCGKTVEETTKLLWDLAYAGVTIVNKIDGVDFWHEVWVPGHMEMIVNNKENVRKHPE  
VARAFDAYGKRRGPVAAGNFPVGAGAMRVIPIQRAIDGETRHSFEEVEKYINDAHLISV  
SDCSCRTSREIMGEGCGHLKEDMCIQLDHAAEFYIRTGRARQITKEEALIMHRAEDNGL  
MHSIPNLDGPGHTHAICNCCGCGCFSNRIANMYNNPDMVRSNFVAQVDAEKCVACGECVE  
NCPSNAAKLGQKICTTEAERKKVTKVLPYDTEWGPETHWNPDYRTNKKVVEDTGSSPCKAG  
CPAHIAVQGYIKLASQGRYSEALELIKKENPFPAVCGRICPRKCESQCTRGLDDPVAVD  
EIKKFIAEKDLYADTRFIPEKRHNYGNRIAVIGAGPAGLSCAYYLALDGYQVTVFEKEQK  
LGGMLTFGIPAYRLEKDVIDAEIDILRVLGVFVKTGVEVGKDVTIPELRKQGFEGFYLA  
GAQAGRKLGLEGENAEGVFAGVDFLRMVNLGQKTDIQQKVIVIGGGNVAIDVARTARRSG  
GEQVAMYCLESRREMPALPEEIEEAMDEGITIENSWGPKRIIVKNGKVAGVEFKQCTRVF  
DETGRFNPAFDEATITVEADRVLSSVGQAIDWGRLLGTTIELNPNKTIKVPVTFQTA  
EPDVFAGGDVVTGPKFAIDAIALGKEGAISLHRYVHKGQSLVLRGRLKRDYKPIDKENLNL  
EGYDAIPRQRPIVEVKEDDKLSFRDTRGVLTEEQIKKETERCLSCGATVVEFMCLGCGQ  
CVIRCKFDAIKL VRRYNAEQLPYEKIKPTVMKYILKRKVRIAGKKVLTNVGSMFGKKD\*

>SPSA8\_v1\_140010|ID:41145349| [NiFe] hydrogenase nickel incorporation-associated protein HypB [Spirochaetes Bin 1 SA-8]

MNTYRVLEIKKTVFSGNDERAKILRNNLEQQGVFLNVMSSPGSGKTTTLVRTIQNMKNQ  
FKIGVMEADIDSDVDASTIAKTGVKVIQLHTGGMCHLDAEMTREGLDNLQLQDLDFLE  
NVGNLICTAEYDTGAAKSMMILSVPEGDDKPLKYPVMFQKVDAILVNKIDALPLDFDNLE  
RFKEYIARLNPNAAIFPISAKTGEGMDVWISWLNKEVTSWKAIKTNQ\*

>SPSA8\_v1\_140011|ID:41145350| Regulatory protein GntR HTH [Spirochaetes Bin 1 SA-8]

MELPKLQAPSLKELFIKEMEAQILSGKLPISEREISEAMGVSRAVNVNAGLLEMAR  
KGFLEVKPRSGAFVADYRRRTSETLLSIMNFNGGMLGRQEIKSILELRLVLETLELELA  
ITRITEEDLAIIRKHLDTLATAIDPQTAEEAFCFHYEIGFMSGNTLLPLIFYSFKAPVT  
MLWQRYITLHGKDMLYQNTKALYEAIEKRSTAEAIHLFRESINQTISSGGVSIYYE\*

>SPSA8\_v1\_140012|ID:41145351| Transcriptional regulator, AraC family [Spirochaetes Bin 1 SA-8]

MKIKDAVYVYRLMSGERLAWHGRYHAHARGEYEFHYFMEGQGALLINKAKYIIDGGQIYF  
IKPREFHSILPEAVEKPISSYYAVLFEPEAGNPADDDIVTLLGHVWHARSRAFPVDSKDRF  
LLDDLYRLSKSPSEQSRKAAEHALLSILYRWFDHIDSPTPALSAPRTKNEHVERALSYS  
KHIREKLSDDLAAARLGLSEYFIRLFRHHLGMSPFQYFTRLKIEAASAVLVDNQLTISD  
VADRFGFENPFHFTKVFKKCTGLSPREYRKIFFEAGKPPSARSEE\*

>SPSA8\_v1\_140013|ID:41145352| Xylulokinase (fragment) [Spirochaetes Bin 1 SA-8]

MGVVCGIDLGTQSCKILYNPHTRHILAKSQAALDIIAKNDGTREQKAWEYETALSDCFA  
AIPDLRADIDAIGVSGQQHGFVPLDADGHAIKRVKLWNDTSTAVECEELTGKAGGNAAL  
LAETGLMLPGYTAPKILWLKKHEPDAYARLRYVLLPHDYVNFLLTGAYVTEYGDASGTA  
LLDVRARTWSRRASAASSIQISSIFLI\*

>SPSA8\_v1\_140014|ID:41145353| Xylulose kinase (fragment) [Spirochaetes Bin 1 SA-8]

VSAAEAKRFGIPEGAVVSAGGGDNMMSAIGTGTVRDGFSLTMSLGTSGTLYGYSKTPVVD  
EGNLAAFCSSTGGWLPLLCTMNCTVASEQIRALLGMSVEELNLRAESAPIGAEGLAVLPF  
FNGERIPNLPNGRASINGATAANFSRENLARAALAAIFGMRIGLESFKKLGFTAREIRL  
VGGGAKSRLWRQIAANVMGLPVRVPEEEEEAAFGAAIQALWCLEKAGGRARNIEELVDAH  
VAIRGDSAVEPEPEAVACYEEAYENYSKYLAVLSPLYR\*

>SPSA8\_v1\_140015|ID:41145354|xylA| D-xylulose isomerase [Spirochaetes Bin 1 SA-8]

MAEYFVGHKEYFPGIGKIRYEGPKSDNPLSFKFYDPDRVIGGKAMREHLRFSVAYWHSFG  
ADGTDPFGSATQFHPWASDARNPLEAHEHKLDAAFEFFTKLGADFYCFHADRDIAPGATI  
AESEKNLVHMSLARERQKATGVGLLWGTANLFSHPRYMNGAATNPEFGVVAHAAAQVKA  
ALDATIELGGQGYVFWGGREGYMSLLNTNLKREKDHARFLTMARDYGRARGFQGAFYIE  
PKPMEPMKHQYDFDVETVA AFLRTYGLEKDFRVNIEANHAELAGHDFQHELETAALGIF  
GSVDANRGDPRNGWDTDQFPTNVYDTTLAMLAILRGGGFTTGGLNFDKIRNNSVDP  
FEAHIGGMDAFAAGLLAANRILEDGKLDAFVRQRYSSFDAGNGKRFEEGQLSLAELASLA  
PADPDVGRVTSQKQERLENLIMGYVSR\*

>SPSA8\_v1\_140016|ID:41145355| protein of unknown function [Spirochaetes Bin 1 SA-8]  
MIAVSVLFENPEDPRRASAFDMPDYFIDLNLDQILDGINGGLSEYGLQPMFFRHLANAQE  
VRSSTRQSTALSGKFNSTSPIWTISGR\*

>SPSA8\_v1\_140017|ID:41145356| DNA mismatch repair protein MutS domain protein (fragment) [Spirochaetes Bin 1 SA-8]  
MTSARVVPNDFSLQGKERMIVVTGPNQGGKTTFARAFGQLHHLAAIGLPVPGSAARLFLH  
DGIFTHFEREETIKSQRGKLHDEILRIHGLERATPSSIFILNEIFTSTTVKDSLFLSRK  
ILEKILALDAITLCVTFLELASMDDRIVSMVSCVDPQDPSIRIFKVERRSADGLAYARS  
IAEKYHLTYESLTSRLAGAHDKRGERKSEGKNSVPDASEVKA\*

>SPSA8\_v1\_140018|ID:41145357| DNA mismatch repair protein MutS domain protein [Spirochaetes Bin 1 SA-8]  
MKVFLMYKDRDFDRQAPLPAWAEALMQDFDLILLKAMSADDRFLYDISKSALFQSVMD  
GNILYRQKVLDDSIQNEKTVRDIYTLADEAVEAKRKNWFGVFGAYPGSILYSAVRMLEAY  
LPMLEKLRAIAREKQSAFKSEGFTRFFAMIQDELSDEYVRTVSQYLKDLKFESGIMISAM  
LGEGNELTGHALRKPSSKDKNWIRRILGPKTPAYSFSIDPRDEPGTHALGELRDRGINFA  
ADALAQSAHDVESFFRILKSEIGFYIACNLRRKLISMGETLCFPVPFAQGALTFEFSGL  
YNVCLSLFSGRKSVMNNVRANGKNLAIITGVNEGKSTFLRSVGGIAQLMMQAGMFPVPAEQ  
FSADIRSGIFTHYRRKEDRDMSSGKFDEELKRMNTIVDRIQPHSLIFFNESFASTNEREG  
SEIARQIVSALLESGAKVFFVTHLYTFAAQFSGKANTSTIMLRAERRQDGTTRFRIVEGA  
PSQRSHGEDLFYKVFGEKEPGAE\*

>SPSA8\_v1\_140019|ID:41145358| protein of unknown function [Spirochaetes Bin 1 SA-8]  
MLMKLSQLTKEQKAILARLKAWLALQLAAEAFRSDAGLQKRCPVGGVSLKLKIMQNGAGR  
GGSVHSSSRDMAINPAASASSADESAATATKPAATLQLFVKKGNAIVGARNWPQLVLF  
PGSEAAIKVLSGGKGAALPLPLSPGAFKALGFFKKASSRATELLREAQTPDMVRASLLLA  
ATLHGLEAVSGDSYLERRMLIVPDGTVAVRVGQIEFFAAKRGRDIRVMESAQHPDAVLSF  
SDYQSAIKVLSGKRQAVVALGSGEVKIEGLLPLVQGLFAVLDRLSWYLGVS\*

>SPSA8\_v1\_140020|ID:41145359| Aminotransferase class-III [Spirochaetes Bin 1 SA-8]  
MSSGKKFARSREYFERAAKVIPGGIYGSKSPGFLVPGHFPYYLEGAKGSCIVDVDGNQYI  
DYLCGYGSQIVGYGNPAVDGPALDQARRGDLNQPHPVMVELAERLVDLVDGMDWAVFVK  
NGTDATTLATSIARADTGKQIVVAAEGAYHGAANWCSTNVFPVFTSAEQRDVRFSSYNNI  
AQLEKLFIDNKNNIACVILTPYHHPTYKPPQLPTPEFLKAVEVLCQREGAYFIMDDIRAN  
FRLSMAGSHSYFGAHPDMVTMGKALANGYPISVLLGAEALKKTASSFFITGTYWMSAVPM  
IAAMATLNEMERLGGPHRLAQLGTLLKNGLESLEKAGFKARVSGPPAIPFLTFDEDPNL  
FLNQRFCAAMADRGVFMHPHNWFISLAHSEEDIERTLSAAREAFEELRGGFSALFMNKI  
HEQ\*

>SPSA8\_v1\_140021|ID:41145360| putative integral membrane protein [Spirochaetes Bin 1 SA-8]  
MMHVLLIGFVVLFPVLLFLKERIPMAKWSTLIVCYLAGLALGNIGLVGESATGLLDTL  
SSVAVAVSIPLLLFSVDMKKWKELSSKAVLAFVLAALSVSVVSGLAYALFRMRSNEAYKV  
SGLLVGLYTGTPNLAAIKTALSVDRTYLAVHTSDMVLALYLLFVMSGAKSVLRKFLP  
TRDWDANVASSEIVSFTSRFSDFYFGKGLWKKIGAGLGLAIIIVGISLGLSGLVPADYQTM  
VTILLITSLALAASL VPSIRALPMTFATGEYFLYVFAVAVGAMGNISQIFSGAGIWWFFV  
LLVLFSGSFLHAILCAIFKIDVDTMLIVSVSAICSPPFVGLAAVSLKARKLILPGITTGI  
IGYAVGNYLGIALLAEFLKAIGG\*

>SPSA8\_v1\_140022|ID:41145361| Short-chain dehydrogenase/reductase sdr [Spirochaetes Bin 1 SA-8]  
MALEAAQHGARLIISGRNVEALADVAHCSKSCAIVPFDVADAGARERARLIVLEKYGCP  
DVLILNAGVSQRARFEETDEDVFNSILETNFFSAVAMTRMILPEMRRKNSGVIACVSSIA  
GLMGAPWRTAYAASKHAQSGFFQSLRAELYGSGIQISMVYPGFVRTAISQNALAGNGARH  
GELDPLQKLGQDPAETAKIVWRKLEQGSLEIRVAFDGKAHLGVFLSRYFPALFAKSISRH  
GGL\*

>SPSA8\_v1\_140023|ID:41145362| Transcriptional regulator, LacI family [Spirochaetes Bin 1 SA-8]  
MATMHDVAQRAGVSVATVSRFFNGGYTSPASRASIEKA VEELQYSPNSIAKALSAHSSRL  
VGLVVPVSTNPFPELARAVEEETARKGYQLILCNSEGSIEKEQRFIEAMTSHFADGIIT  
STGNCGEVYKASGMPVVSVDRELGTGAPHVTSNDYRGGMLAFKCLAEKACKKFAFIGAPQ  
ESTSQRHRREGFFHEAERQGYAAPEIFLADEADEYRALEDEGEHLSRYDGIFAWNDHAAV  
QAIRALHQVGRSVPDRDVMVIGFDDVHIARLYIPSLTTIAQPIYEMGRAAAELLMRQMNGE



KLDNVTYLLGIELISRETTAVSANLRVFQHADAF\*

>SPSA8\_v1\_140024|ID:41145363|rbsD| putative cytoplasmic sugar-binding protein [Spirochaetes Bin 1 SA-8]  
MKKYGILNAPIAEVLAAMGHTDSLAIADCGLPIPNDVRRIDLAVKKGLPSFLEVLSAISD  
DMVIEKIVLAAEIQEKNPAVFNAILQMLHGPIEFVQHTEFKALTKSCKAIVRTGEATPY  
ANIILYSGVNF\*

>SPSA8\_v1\_140025|ID:41145364|rbsA| fused D-ribose transporter subunits of ABC superfamily: ATP-binding components [Spirochaetes Bin 1 SA-8]

MDGIRLEMGRGIKKSFGPVVVLKDMKLDIEPAEIHALVGENGAGKSTLMKILGGVIQKDAG  
EIRINGQPVEIRRVRDAERYGIAVIHQELSILPYLSIAENVFLGKELKTRLGLVDARRMH  
IEVAEKLKELGLAVNPDMPAGSLSVGQMQLVEIAKALIHRAKLIVMDEPTSALTDHEIEK  
LFGIIRSLKTKGVSFYIYISHRLEELFSICDRLTVLRDGEYIGTANVRDLSFNQVVSMMVG  
REIGDRFPRKDTAPGETILQVNNLGRGKAFRNVSFVSRKGEIFGIAGLMGAGRTELVRAL  
FGAEPATGTIQLKGKNVSITSPLDAMNLMGLVTEDRKAEGFLDFSIEFNIAAANFDH  
LAKAGFVHPATIRDFAEQFTQSLRIKTPSVDVPPVSNLSGGNQQKAVVAKWLGRSPEILVL  
DEPTRGVDVGAKREIYEIMTKLAAQGVAIMVSSSELPEVVGMSDRVLVMRQGEQAGILEE  
NITQERIMALATGVVYT\*

>SPSA8\_v1\_140026|ID:41145365|rbsC| D-ribose transporter subunit ; membrane component of ABC superfamily [Spirochaetes Bin 1 SA-8]

MRKLSFNRSKYGALAGLIGLGALLSILSPSFLTLNIMNVLNQVSLNGLVAIGMTFVILS  
GGIDLSVGSILALSGAVLASMLKGGMPQIIAILIALVMSAVFGLLNGVFIATFNLQPFIV  
TMAFMTIFRGSTFVFTQGRPITGLGKQGFVAAGRGDIAQVPWVGILLACLIITAFLLA  
RTVYGKTIYAIGGNPEAARLSGLPVKTARASVYAVSGFFAGLAGMVLTSRLDSAQPLAGQ  
SYELDAIAAVVLGGTSLSGRGMVGTLLIGAFIIGILNGLNLLLEVSSFYQQIVKGAVIL  
LAVLLDRRK\*

>SPSA8\_v1\_140027|ID:41145366|rbsB| D-ribose transporter subunit ; periplasmic-binding component of ABC superfamily [Spirochaetes Bin 1 SA-8]

MKLLVFLVLSVAALVTGCAGGGSSKKIGLAVSTLNNPFFVTLKEGAEAKAKELGYE  
LIVTDAQDDPAKQASQVDDLIQKKVGVILLNPCNSDAAATMVEKATKAKIPVISVDRGVN  
GAEVLSHIASDNVAGGKMAGEELIALVGEKAVVELQGIPGASAAIDRGAGFHQAVDGKL  
NVVASQPADFNDRDKGFTVMQNIQANKGIKGVFAHNDEMALGAVKALEAAKLTDVVVIGF  
DATDDAVAAVKAGQMKATVAQKPALIGSMAVETAVKKLKGETVEKSIPVPLELVK\*

>SPSA8\_v1\_140028|ID:41145367| Ribokinase [Spirochaetes Bin 1 SA-8]

MRVLNFGSLNIDYVYQVDHFVQPGETEAASSHQIFAGGKGLNQLAMARAGLDVTHAGMI  
GPEGDFLVRTLAESGVKTDRIGRVSMPTGHAIQVDRAGRNCILIFGGANREIDAAMIDA  
ALSGFGDGDLLVLQNEIAGIGGIMQKAHQRMKIVFNPAPFTAIEIAAYPLHLVDIFVVNE  
VEAAALAASNVSASQRSEASLAQLDPVPSGASTALSADLRSVIKTLANRFPALLIVTLG  
EKGALAVQNGKEIFQPAFKVNAVDTTAAGDTFLGYFIAGLSENRLKASLELAARASALC  
VSRKGASDSVPRKELL\*

>SPSA8\_v1\_140029|ID:41145368| conserved exported protein of unknown function [Spirochaetes Bin 1 SA-8]

MKKGFMVLAVLFIGLPVFAGTTISTTLQAVVGADLNITTTIPGTKAVDPTLTSALGSV  
TISSNVASWTITVHSANGGKMVRAGGGDYPTFTWTGATTGIDLSTDYVQTKNAPQAATTY  
NLAIAYQTAASLGLSAGTYEDTLTITLTL\*

>SPSA8\_v1\_140030|ID:41145369| FAD dependent oxidoreductase [Spirochaetes Bin 1 SA-8]

MTEQSTVIVVGGGIAGLTAAAYVAKKGVVLLIEKNSTCGGLINTFARDGFVFDGGVRL  
ESAGIIPMLADLQIDLPSIKSNVSVGIAGDVINVESEANLADYEKLLLRFPDSADDIG  
RLMDAIEKVMRNMKILYAVDNPLFKNFKEDGAYFVSKYLPWMFKFLLALRKIDAMKGPVE  
EFLAGIKNQSLMDIVDQHFFAATPTFFAMSIFYLYTDYFYPKGGVGTLPKAVQEKLLAF  
GGRIKNDTKIVTLDPAAARLLTDSEGNTYQYEQLVWAADLKHLYSIADTNGLPQEKASKIK  
AEKDLLLSRKGAEISFTLFLAVDMPPEDFKKISHGHFFYTPSPKGLGETHRSELQGLLKQ  
WGLDKQTVLAWLDRFCELNTYEISIPVLKDSEAAAPPKGTGIIASLLFEYELVRRVKEDG  
WYEEFKSHLEAKMIDVLSSSIYPGLKDHVLFQFSASPLSIEALVGSSGGAIIIGWSFKEPV  
PVTSSMLGVNDSIKTSIPGVFKAGQWSYSPTGVPTSIMTGRLAADA AVKAIKAIKARKG\*

>SPSA8\_v1\_140031|ID:41145370| Short-chain dehydrogenase/reductase SDR [Spirochaetes Bin 1 SA-8]

MAEKKVRQSRVRKYWPQYKWSNIAAMLKNNRIPPCLCDLDFNGKLVVITGATSGIGYKTA

RRYAEGGADLIVINRNREKSRALCEEIQRDFKVRCDIADLSQLDDMHRAADQLAALER  
PIDVLIHNAGVYLLKRSVTRDGLTTFVHFLSSFIINWKLKLDKLRNRRARIIFVGSSE  
YRFAVWGLNLDLQFERGGYSLKAYGSAKTAQLLAMHRFARLFEGTDVCINAMHPGMVA  
TNTGRENHAFYRWYKKNILDRNSLPPEVSAQALFYLVSPDLRGVTDSEFFNLTTKEELAP  
PALDLEVADELWQKSLELGRLA\*

>SPSA8\_v1\_140032|ID:41145371| conserved protein of unknown function [Spirochaetes Bin 1 SA-8]  
MERLMDTDAFVITDIEQFTALWSKTYNREGKPDWSHIIPYYDESIHFKDCIQEVRGIEEF  
KALTERLARRSNELSMALKNAVMLGRLIYMEWEMTILYRNTRSSVIYGASRIMLSEQGKI  
IDQRDYIDLWGDIFDNIPKFNRRYRSFMKKVFG\*

>SPSA8\_v1\_140033|ID:41145372| exported protein of unknown function [Spirochaetes Bin 1 SA-8]  
MKRIFTFLCLFLASGLFAQNLAKEFSSPDQTIEYHFMLEIKNLNEKDISTAFQSAIVE  
PLKEIVSVGALGKFKPGIYIDRSYGLEKQNLIVRVRTGQITIKARASSPDALLDLEKGT  
SKKYEMDYFGTPDYSISTDIKFPEAEFDIQPSAWTPAKLWDFIEKKSPAIMKQIQPAIQA  
TPDIEIPGVAHMYSANIEIKHPLAQKLKEMDGLVESGLAVWFFPPTDSYLVELAYTAKVK  
AQPVAEQLYYDLIEKLKSSGLYASNQISKQQYFAAYFGPKK\*

>SPSA8\_v1\_150001|ID:41145373| Uncharacterized ABC transporter ATP-binding protein HI\_1470 [Spirochaetes Bin 1 SA-8]

MKAVSLENISFSRLGRGRILEDISFSIEAGKKVAILGANGAGKTTLLSLISGHLKAESGK  
IELNGQPLRSLSPLERARMIALLPQIERLPFNYSVLDFVLMGRAPHIQALSQPSEQDYAM  
ARSALAEHLHLEKRSAAEISGGEFQLIRIARCLAQEADTLVLDEPTSLLDPANSQRVA  
RELALLAEKNRTIIFSTHDLALVQSVSDLVLLLYNKKIMMFDIPX

>SPSA8\_v1\_150002|ID:41145374| Transport system permease protein [Spirochaetes Bin 1 SA-8]  
VNNPDNGRNLGRMILLVLLLGVFILYLFGRYPRLGFTSIRDLLHDTTQRVFFSLRLP  
RALGAFLLGTVLGGAGAMLQTFGNPLVDAGFLGVSQGSAFGAAIALVLGSGPSLAKNLG  
DKGLAVFVMSLSFVMALGALALSFLAKKFKFGGQVLRVLAVGLAVSAFFSSLLAAVKYV  
ADPLKTLPDIVFWTMGSLSAMTWQKLAGIAPLAAASVIVMFVLRWRSSLLSDDQVSRSL  
GLHPEAERAIAAVFAALGVAAMTASCGIVAWVGLVVPQGARIIFGPDGRDALPASMLGGA  
VFLVLLADGIAKNLFSGELPLGIVTALMGALLFVFLVTSRKTEMAR\*

>SPSA8\_v1\_150003|ID:41145375| putative Periplasmic binding protein [Spirochaetes Bin 1 SA-8]  
MKIKFFPVLIFIALVCGNLPAQERIVLGGSKAVIMVVDVAVYLFPEAGSKVVASAKGDQGL  
GIFLAAIDPSYAKRPIFETSAGAETYASFKPDVIMKSANKKSLGPALDALGIQQLYLN  
ENPDDYYSEITLLGKLFKNEKRAAEVVAWYKSEVKKVTDKTAFIKQTEKRKVLVLQPSAG  
AEGVWEVPPASWIQTMMVELSGGIPVWTSANPGSGWAKVNAEQIAAWNPDVIFMINYKDN  
PEKSAENLLKDGRLAGVSAVKSSSVYGFVKDFYSWDQPDTRWILGLRWMAATLNPALFPD  
FSAISLAKNFFNFAYGMDEKLFNQTIMPRLSGTVEGKAGK\*

>SPSA8\_v1\_150004|ID:41145376| putative ABC transporter, transmembrane region:ABC transporter related [Spirochaetes Bin 1 SA-8]

MNKIHHIRWIWYVWKEKKGLIVLLLFLTLLSSAVAVAFPLLTRTLFDLQNILANDTRYA  
EPLKEIRKIALYFVALGFAGFIAGFFPGIRGALNVVFDYIVRNKYFKAVTEKDYRFFSKY  
SSGDVVRTLSDISDFPKLSWFLCSGIFRAVESGSKVIFCAIAMFLLDWRLALFSIISLP  
FMLYIFSKTQDTIYDKVNRNEQAISHINEQLEMSFSGARIKAFGSEKKYERFFSDALSR  
RFETEMGVIKLETVLNLIYQNIDYVAQIALIFAGGLMVVRNSITIGTFYAFYNYLNLLIY  
PILDIPQLFIFGKRAFVNIDRLEEMKDFPAWRDFAEAQSGQGVLEHFESLKAHNVSFSYE  
GRLLPAVRHVSFEMKKGERILVIGPVGSGKTTLIKMIAGILPAQEGEISINGKNLQEIQP  
ASWARLFGYVPQEPLLFSGTIHENVAFGTKEEENLTHDDFWRYIETAQIGEEIRTFPLK  
ECTVLGQRGVSVSGGQKQRLAIARALAREPELLFDDMTASLDTKNEGMLWKALEGKDIT  
IVAVSHRLSSVQYVDKVLFMKEGEMIAYGKHEELLYSCDEYREFFAGNISLVDVK\*

>SPSA8\_v1\_150005|ID:41145377| Xenobiotic-transporting ATPase [Spirochaetes Bin 1 SA-8]  
MKLKQTYNLQLLKYVADYRYLAVPGLLVMLVITGGRIVQPLILRAIIDQAVPHNDAGLLL  
KFAFLYLGIVILTGGLNYLGNIMVSKLGLSIVTRIKQDIFSHFLRLPASVYFDAHPVGELM  
SRTEKTEKVRDLFSNLGVTFIVSVLMMMLGMFGVTLTIAPALALIMIAVTLVFLVILLF  
FSRLMKLYDASRSLHARVTAKVTEFVQGIELRAFARTDWARSLDKTGKEKMRNDVRVS  
LFEYSAMSALDSL VGPLFIVALILLYAPRVLTGAMTLGTTLLFFEY GASLLRPVVEIAES  
IRRIQQARTSLKRITTIMALPEEAGRKNEIAPIFNHEIVFENVWFAYKDEDWVLKDVVFS

IEKGKMTAVVGASGSGKSTTVSLLCGFYHPQKGRITIDGTPFSSLNLVEWRKKIGLVLQD  
VYLFPGSVFENVRIYNDEIPESEVRSALARVHAEDSVQKLPSGIATNLWERRGNLSAGEK  
QLLAFARAIVVNPELVILDEATSNIDMETEQKIKASLEILLKGRITSLIVAHRLSSILNAD  
QILFFSEGKILASGTHQELYENLPAYRLLVEQQFLKQGNENE\*

>SPSA8\_v1\_150006|ID:41145378| protein of unknown function [Spirochaetes Bin 1 SA-8]  
LVIGRNPGLADSSGLRLNQSFEETVAILMKHLHHELMIFS FVHKPPYYHHFPKTVQV  
GK\*

>SPSA8\_v1\_150007|ID:41145379| putative Cys-tRNA(Pro)/Cys-tRNA(Cys) deacylase EbsC [Spirochaetes Bin 1 SA-8]

MSHEQPASRQKTNAIRFLESKAIDFDILEYEVEDVSAIHVAEKLSMDPDQIFKTIVLKG  
ERAGYFVCIIPGSCEIDLRKAAKAVGDKSCDLIPLKDLEPLTGYIRGACSPFGMKKKFPT  
FLDETANMFDKISVSAGKRGMQIFIAPELLAQLAEAEMTDLIQ\*

>SPSA8\_v1\_150008|ID:41145380| putative 4-diphosphocytidyl-2C-methyl-D-erythritolsynthase [Spirochaetes Bin 1 SA-8]

LPLSFALDILLMKPSLLNPEPVQQLPCILLAAGASSRMNGTNKMLLPLAEKPVRLYLAE  
TILSATRPLIVVTGSVQAEFRILEGLPEVIFAHNADWQRGMVSSAQTGIRTMLEAGDFS  
GFFLHHGDIPFVTEKVSALASEFHARQRQGLKETALVSFAHGRNGHPVLPASYASAIL  
SLGDGERLKSILLELGSVSVETGCEGVLEDMDTKEDYEALRKKFLPEMYRGVRE\*

>SPSA8\_v1\_150009|ID:41145381| conserved exported protein of unknown function [Spirochaetes Bin 1 SA-8]

VKNRIISAVFFLLSFTLLQPGAQQIHPLEGDWTGILSPGGMNLRIVFHIVQKNGKLTATM  
DSPDQGVKIPVSRVSLVSDILELEVGSVKGMYSGKISANGMKIEGVWKQSGAEFVLNLE  
RQEPNASHAQSNNQSTKNSPTQRPQEPKPPFPYTSHEIVFKNTKAGISLSGTLTIPAGKG  
PFPGVVLVSGSGPQNRNEEILGHKPFVVIADYLARHGVAVRLYDDRGGV GASRGKFAGATT  
FDFADDAEAAVEFLASRDEILKDGIGVIGHSEGGLIAPIVASNNSKVNFIILLAGPGIRG  
DQLLALQNAAGRASGMTEASISIAWDVNTKLYAIAIQNEEAALERKIVNEVKSQDPD  
GKADAEQRKTLEAQGRQVANQLLDPWMRSLALDPAPYLEKTRVPVLALNGSMDLQVPAD  
ENLAAIQKALIIGGNQHVT TTKLDGLNHLFQHSKTGLPSEYGIIEETFAPEALNIMLDWI  
VTLSVQQ\*

>SPSA8\_v1\_150010|ID:41145382| argH| Argininosuccinate lyase [Spirochaetes Bin 1 SA-8]

MAKLWDAGTASEVLDKDVFLSSLAVDSRLLREDLECSIAHSRMLGKTGILPAEESAAI  
TAALESMLKELAEGLTVDTDSEVHSFIEAELVRRLLGEAGKAVHAGRSRNDQVAAAFKL  
HMKRACKNTAFDVLDAIEAILSAAKNHTETLMPGYTHLQRAQPVTLAHLLAWCAALERD  
YSRFTDSMNRLDESPLGSGALAGSGLPTDREYTADLLGFARPSRNTMDAVADRACIDYA  
SAGASLMVHLSRFCEALWVSTEYSFMKLTGRASTGSSIMPQKRNPDP AELIRGKAGRV  
FGNLQALLVMQKGLPYAYNRDLQEDKALFFEIEDILHGVLKAFVAVLVTSLVPDAAKMEDA  
LKDGYLEATDVAEFLVIQGIPFRAYKAAKELVQICVRKKGKRLRQIDQSDLAEAHQVFAE  
CAVAPDVLADYLAPSASVERRKQTGGPAPEKTRSEIARIESFIAAQRKA\*

>SPSA8\_v1\_150011|ID:41145383| argG| Argininosuccinate synthase [Spirochaetes Bin 1 SA-8]

MKKKIVLAYSGGLDTTVIIPWLKENYDCEVVAVCGDVGQEQADWEAMGKRAVSSGASKFIR  
LDQKEEFVKEYLWALVKAGSPYEKKYLLGTS AARPLAKGLAEIALQEKADAVAHGCTGK  
GNDQVRFELGVKAFAPEMEVIAPWRIWDIQSREEEIEYLEKRNIPVPMKKS DSYSRDDNL  
WHISHEGLDLEDPANEPKFEGLMKTVAPEKAPDKAEYVTLAFENGVPVSVNGEKLDPVS  
LVKKNLQIGGKHGIVDMVENRVVGMKSRGVYETPGGAIIMAAHDKLEELCLDKKTLFSF  
KMTVAQRFAEILYEGEWFSP LCGALNAFIDWTQKTVTGRVTLKLYKGNILSAGASSPYSL  
YDASLASFTTGPLFSHHDSTGFINLFGLP TKVRARLNARIAAHGTAAGPDVVKPGSSGYT  
APAGD\*

>SPSA8\_v1\_150012|ID:41145384| Sodium:dicarboxylate symporter [Spirochaetes Bin 1 SA-8]

MAEKKESKGLLSWYFNTNLLARILIGLVLGAIVGILGFFPSSVKPFVDNSKFFGDLFIR  
LLKMIVVPVILFSLISGAASIAPSR LGKVGIKIIVFYLLTSAFAVAIGLIFANILQPGAG  
FNVVGDAAIKGKEAAAPTIIQILLNIVPTNPIDSLAKGDVLP IIFFAVVFGIGVSYVKDS  
KNKSVANAGTVILDAANGAAEAMYKVVAGIMQYAPIGVFVLI AQVFAQQGPKAIGPLLVV  
TLAVYLGLLVHAGVYGGLLSIYKLGFLKFLKGANEAMITAFVTRSSSGTLPITLRCSEE  
KLGIPRAISSFTLPLGATINMDGTAIYLGVCAMFIGY AIGQPLTFNQQTLV VITATLASI  
GTAGVPGAGAIMLLMVLESVGLKVTEGSNVAAYAMILGIDALLDMGRTCINVTGDMAGS

AIVAKTEGELDLKWK\*

>SPSA8\_v1\_150013|ID:41145385| Aspartate racemase [Spirochaetes Bin 1 SA-8]

MRKLTGLVGGMGPEATVYFFSKLVAFDKVEKDQDHLHIIIENNPSIPDRTRHLLFNEEN  
PIPAMLSRLLEQAQADVAAIPCMTAHAFLSTLRQAKIPILSAFEIMAEEKIPILFPGL  
RKLGLATTGSRELRLYESHLPFAFECLWPDQEIQEEMVMEAVYGGQEGIKAGNSGSYPRNL  
LVTASRNLAAGKAEAIAGCTEVPLVLRQSDLNMPIDPMTLMAEHMVEYARNHGSAT\*

>SPSA8\_v1\_150014|ID:41145386| membrane protein of unknown function [Spirochaetes Bin 1 SA-8]

MYLSEIISAMTDFFASMPPIGAFLSFIAGWIIAKLFQIILPKLLSFLKFDRLSEKVGIT  
NFLKKGVEYAPSKLAGMLVYWFLMIVVLSNTLAILDNTAAASLSDWLRSAALPRITIAALL  
IVIIGVVIVSFLSNFFITIAKNAAIHNPILIGKIIRYVGFILGTMVLEQLGLGQIVST  
LLLVLFAAIAFGMALAIGLGCKDMARKFVEDFVRNIREKERLKHGSDLEG\*

>SPSA8\_v1\_150015|ID:41145387| NAD/NADP octopine/nopaline dehydrogenase [Spirochaetes Bin 1 SA-8]

MDDQKSWSEIENKLRGKALLGKKAVWCVAGAGNGGLAMAGHLGLLGFVHLYNRTDEHLN  
AVRWYGGVDIEGAVEGFGPIALATSSIQEALQGVDDVVMIVTPSTAHYSFAAKMAPFLQDG  
QIIVLNPGRGTGGALEFRQVLKSEKCSARPVIVEAQTFIYASRMLTRHRAHIFRVKNGVVPV  
SALPSFLTPGALAVLNNAPFEFTAGTNVLATSLLENIGAVFHPALTLNAGWIESTGGDFE  
YYIQGISPSVAKVLQKIDDERLALARALGIRTVSAREWL YLSYDSSGDTLCEAIRATSSY  
IGIKAPSTINHR YIWEDVPMSLVPMSSIGAMLEIPTPTIDLIKLAEDMLEADYRSSGRT  
VETLGIKGMNIEDIHRLVTEG\*

>SPSA8\_v1\_150016|ID:41145388| Cobalamin B12-binding domain protein [Spirochaetes Bin 1 SA-8]

MIKIDKSDVGLIHPHIDVHNLGITSFSRILEDGIRTELCDETVSLAIENLNEHNARII  
AAWIKNKHITISGFSYRLDPDDAVRLFDIWDIFLKSSNLLASRGGPIRGLFFAGLPDACK  
KVRVRFPFVDACFSGDETIHETIEKAGIPRSNMPALSSSLTYDDDRALGEDVIHTGNY  
FSVSAVNRHGYDGYGKRGDSVSRIRHGDEHHLPLIRVHAGPYLADRKEAVKLFLEWSK  
QLAKGGLLDVLSIGTSQLTQSNFGENWEGMHNGGGVPINSPDEYRQIWEASRPMLVRTYA  
GTKDVLWLAQMHEQTIDIAWHALSFWWFCKIDGRGPNTVFQNLQEHFDAMHYIASTNKPL  
EPNVPHHFAFRGTDDLGYVLSGAIARAASGKIKTLILQIMLNTPKYTWGIQDLAKARA  
MLRLTKELEGPDFTVFLQPRGGLDYFSPDSFKAKTQLAAVTALMDDIEPLNERSPQIIHV  
VSYSADRLADPAVIEESIKITRYSLDRYRALKKSGDIPDMTNNPEVAEREKRLYTEAKQ  
MLAFLESAIEKPYTPTGLYRMLKAGVFPLPWLTSCEEFPKAVAVQTRFHNGGVIAIDQA  
GGMLPFEVRQEMVRAALLEQKP\*

>SPSA8\_v1\_150017|ID:41145389| conserved protein of unknown function [Spirochaetes Bin 1 SA-8]

MIYKPELYHGFACKPPFFEGWYYKQISADGINTLILIPGVFFGKSADDTHAFIQVYDGKS  
GTSWYCRFPADSFASRNEFSIHVGGSRFSRESVHLDIHQDGVVLVGDNLKNHHPWPVT  
PLSPGAMGPYGFLPFMECNHAVLSFTHSIEGSVSLNGADIDFSQGKGYMEKDWGSAFPST  
YIWFQTNHFKATDTSLFGSIADIPWRNSSFSGFILGFMLKGLYRYATYSGAKIRKLQVS  
EREIELIAGDRKTELEVNERHHGAALYAPYSGEMRTKIYESLSAKTMVRFYSIAAGLRH  
LEWEGSGEHTGLECVGSLNFKF\*

>SPSA8\_v1\_150018|ID:41145390| conserved protein of unknown function [Spirochaetes Bin 1 SA-8]

MLFYDRPDGKKIKQPHAMNALMPYMMRGRNESAVYEEKDIDMENALRYIRQKNSALAPSS  
QSLKAEYRYSFLGLVLAADVVRTVALRPELNRFIHRGLYQRNHIAISFIVKQKMTEEAP  
ANAKVFFEPADTLDSVTEKINAIRHAREYGGGDEKIAKIAHSIPGGKALIMALYRFL  
DRFNIAPWALIKTDPLYSTAYFANLGSIGLDTPYHHL YEWGNASIFVVLGKLFQKETRQG  
SSYAHHHYINFKVTLDERISDGLYFARSAALFARFFSHPELLELPLDELRELLKKKQEA\*

>SPSA8\_v1\_150019|ID:41145391| gly| glycine C-acetyltransferase [Spirochaetes Bin 1 SA-8]

MYGAVKEELARKLSQIQSEGLYKAERVITPQGAIRVRDGREVLNFCANNYLGLSNDVR  
IREAGIKAMEAWGYGLSSVRFICGTQAPHKELEKQVADFLGMEDAILFSSCFDANGAVFE  
PLLEDCAIITDSLNHASIIDGVRLCKAKRWVFKHADMRDVEEIDS DTGKQAKGLERCLK  
ESQGARIRMIATDGVFSMDGDIANLQAVCDLAERYNALVMVDDSHATGFVGTGRGTWEH  
CGVAGRVDIITTTFGKALGGASGGVIAARKEIVEYMRQKARPYLFSNTLAPSIVGGTLKA  
LELLTATTELDRDLAANTERFRTRMTEAGFDIRKGVHPICPVMLYDEKLAHAMADALLEE  
GIYVIGFSFPVPRGKARIRVQISAAHTEDQIDAAVTAFAVKVGGKLGVV\*

>SPSA8\_v1\_150020|ID:41145392| Rhomboid family protein [Spirochaetes Bin 1 SA-8]

VRIKYNAPVTLTFTFISAVLALSILTILPSLTSWLFSTPVPFRSKVFGDYLLKITYIFGH

ASVQHYMGNFTMILLGLPLLEAAYGSGFILLSIFITALTTGLLNIFLFPNTVLLGASGIV  
FMMIILASITNFNKGEIPLTFILVMVVYLGAQVWDALSKQDNISQFAHIAGGLAGSFLGF  
FRTKLH\*

>SPSA8\_v1\_150021|ID:41145393|exoA| Exodeoxyribonuclease [Spirochaetes Bin 1 SA-8]  
MKKFLSWNVNGIRACAQKGLDWLSSSENADFVCLQETKAHQEQLPPELRNFVDEAGHPYK  
IYWSQAQRKGYSGTAILAKQEAETLGIPEFDDEGRTVIADFGAFILVSA YFPNSQEA  
GARLDYKLRFCDAVLAFCENQRKAGRHVIVAGDYINIAHTPIDLARPDQNEGNPGYLPEER  
AWMGKYL SAGYIDTFRHLCPEPGHYTWWTYRVPNARTNNIGWRLDYHCLDREFLPALDA  
GIQSEVRGSDHCPVSLTLDI\*

>SPSA8\_v1\_150022|ID:41145394| ROK family protein [Spirochaetes Bin 1 SA-8]  
MTNEDSGPVRSTTIRERNE TLVRLIFRTGSLSQSKAVLKTGLKAPT VFRIFAQLEKRGL  
IHEIAAESKPDTDKRPRKGRPV EFAVNPDAAYVVG LDFWARSASAI VQDFSGQVIASRS  
VCFPMAPNAESA VQVLSTLIHDM LREVR IPEEKLLGIGV GAGPSVSLATG VVHFYSRIPG  
MVEFPLGERLEKEFHAPVSVTNNASIVALAEERYGLAKGSGSLFAFLIRAGVGGAYLQNG  
RLISDRGRTA FEVGHLSMDRNGPECSCGNRGCELYLSEDSILAALNSAFP GIDMDRIDE  
ILTTECEKAIPL LAPLFDIASHAVRDVRRLLAPEAVLIVTRS QKLSQCIAEAAK TDFARS  
DQRFPPGAKIIAAEYDSLLACKAACDLVYESYFSKGSKASAEQRNRTAARKGIQE\*

>SPSA8\_v1\_150023|ID:41145395| protein of unknown function [Spirochaetes Bin 1 SA-8]  
MFRKQHYFSSRWKESRHVADFEISADTQAESFMKALQELSHEDDELPLSELGPVVFRDG  
IFQIDMEPSGKTASLDPALKGLIDSILGS\*

>SPSA8\_v1\_150024|ID:41145396| exported protein of unknown function [Spirochaetes Bin 1 SA-8]  
VKFRNTVICLLFFLQAVSLASAQAVRNLDTLGRFSTSRFEIYYPQSL SDEAVRLAGFADR  
TLAELESFFGAAAERRKIPVLLSDTRMDLNGYSTTFPSNRIVIFCAEPDIASGLASLDDP  
LYLVFLHELTHEVTLNIRSPLWKFLKSVLGDVTPSGWIMPAALVEGQAVYIESGFSGRA  
GVSEAQKAGRLNDPAALELVFDEKRAQLARSLWDVSGAMDFPGSGSLPYLYGALFVRYVG  
ERFGQAALVQLWREAGNGNILIGFENSLLAEGIVKKVTGVNADQLWVDFQDWLGGVASGA  
GSHGDRISENTPPAGGSNQLLRSGLVPISRRIGAFSAGSNAIFYLDKEKQAVFRQDFSG  
ESFSHPKLFNADGYVRQMALSDDEKTLLVDWRA YDSNQNL RPAQYRFDLEKGR LIQDRA  
PSDAQALADIASRAQLQYLCPVSVNGQIIYGLLRVGT VVYPARVFADGRIE IWKGMPGA  
VRSISIWRSRKPAAEKNS ESIGIVLGLVGDDMISR PMLLEEDEGNWSAREVVCALPSGGA  
HSPALLTEDRLFSSPGLNGINILYWSEFSRTRNVPGRWEPYEKETA AAEQDLGNTMQAP  
AQTRRFPEVFRTRSRLPYADAESVGISFQAMD LTERLSWSANLGFNISASAPEASLVIALS  
TLKGRMILAVQDGASAGPGSSVTRISSILFDYNRHRGFMPVWKS LDFSIDARYAGLQNNY  
AADSFFSLNPDYMAVSFGIKTQGSTIRQSSFAPFNRHGVLMMAALDLEGTSVSTASLSFA  
LQGSAAALSSAGIQADFYLSGSITSDELRFAPSGRY YAFSGNNWISGRPAEYPIFQEYAAI  
DGKRFYAFSELSARLFSAGFFNKEGQSSVIK MPLSPSLLARRAGMVAGSRFAFLFDNLAS  
QFLSSLFIRAELDFSVLAGLAAQNRLVAGCEFALPLAPSLAGRSFLV SFSLKNGW\*

>SPSA8\_v1\_150025|ID:41145397| DinG-like protein [Spirochaetes Bin 1 SA-8]  
MKNKALHESGKKFLPEAISSLREIAIEISGNEVFAIGACDKSGMISEVEIVARGSVSSVP  
ALESWFEKGSVLIHNHPSGNLLPSEADVEVAAQAGSYGVGSYIVDNDVAYAFVIAELVQQ  
KPERRLDCEDMGAVLEYGGKLSRVMPSFEPRESQVLLARDVAAILNDRGILAAEAGTGVG  
KSFAYLVPSLAWAIANDTRV VISTATINLQDQLFTKDIPIIASMFKKPVKSVLVKGRSNY  
LCKQRLGEAIAEEGIFLKEDDSLKKILDWDNSGGSGDRADIPFSVEDSLWSRICSESESC  
LALHCGFREKCHVLQVRKTAASAQVIVVNHLLFADIASRNRSSGGEQTAILPSYSALIL  
DEAHSLESSATSLFTEEF TKFSIFRHVSRLKKSSKTRTSGLLPRLAKLPEIDRAALEKAE  
NALKPLQNTMAE LESEALRMLSSVSSRRLRPADSQAWRGLTERCEQLQKGLLAVSSALAS  
SLANVEATLSNETVIAEAKLLMRNMNDTAVLASRFKDYPQEEDMIFWIQKEHAQRKDPIYI  
SFNATPLDVAPLLEKTVFKKIPAIICTSATLAIGGSFQHW MRRSGIDPSRPDISAQIYRS  
PFPFSSNALLAIDTESPSPQKSPQAFKEYVIRAI PRLVMASRGRALVLF TSYDLLNAAYA  
VAEP LLIQAGIPCLRQGMDSRSRLLSMFKEDIPSVL FATDSFWEGVDAPGETLSQVIITK  
LPFRVPNDPVPEARAE AIEKSGKN AFMEISLPEAI IKFKQGFGRLIRHSEDRGAVVVLDS  
RLVHASYGQLFINS LPESILVVD SLTAIEKKVENFLA\*

>SPSA8\_v1\_150026|ID:41145398|manA| Mannose-6-phosphate isomerase (Phosphomannose isomerase)  
(Phosphohexomutase) (PMI) [Spirochaetes Bin 1 SA-8]

MPLLEKHCIFMKNTRRHNAWGSYDGFQKYAHIQQALDKPSAEYWMGDHPNDPSYLMFSDG  
TSLPLDKLIRTNPKAFLGEEVFRQFDDLPLFKVLSASMPHSIQVHPDKAKAKAGFEREE  
ARGIGLTAPERNYKDKNHKPELAVALSDFRALCGFRPAQETARLLGPELTAFSFSADAF  
QDSLIRLLKKALSLHDHEKYQLEAMALKQAETLRQSSNRADRLAGDAVQECYRHYPHDGG  
AVSPLFLNLFTLEPGQGLYVPAGVMHAYLSGTILEIMATSDNVIRGGLTQKHIDVDDLIA  
VIDFAAQPELIQPVTKNWKIWNTQADEFTLMEFSAVQQGRTSWSVTGPEILFCNQGSFQ  
IECPAGSASLVEGTSVFIAGSCKNCTLAGTGVAAYRAMVPLQKDQP\*

>SPSA8\_v1\_150027|ID:41145399| conserved protein of unknown function [Spirochaetes Bin 1 SA-8]  
MTVWVDGDSVPRDVRILLQRKELTEDIQNQSQSVLRFITTVRLPDVPLPYITKVSPGP  
DAADTFIEEHAAGDVVITRDIPFMDRLAEKGIWALNDRGELITKENSAAERRSLRDASLT  
LRNLGVLPDSPKGSQRTAADTKRFADSLDRLLARILK\*

>SPSA8\_v1\_150028|ID:41145400| protein of unknown function [Spirochaetes Bin 1 SA-8]  
VEDGKFYSHHGLDFEAFKRAKEINDKLGKPLYGGSTLTMQVARTLFLVPEKSYVRKYFEI  
ITALELELILSKDRILELYFGYAEWGRGIFGIEAAARHWYGGKGLASLTKDQAARLIALLS  
SPIKYSPELTKSGILRERYDYLVRRYIENQSAPPDLALVTTPPVSPPEGMDEGDSETT  
EQPAMPGEAGTQEVSAQLSDRVPTQPSQEQTSDPTDTAKQAPTE\*

>SPSA8\_v1\_160001|ID:41145401| conserved protein of unknown function [Spirochaetes Bin 1 SA-8]  
MTTMEMLERLKKYQELLSERVALEEEIATLPKTLETQNEMLSRIKKSFMKDEEFKRVVEE  
KVHELRLQALQEAEMTREHAEQQMDGITTQREYEAINKERDATDKEQALRKDIQQEERVF  
SEIEEELRKNAGTIEQLEVEIAEKTKVIDSQKSEKLQAIEQLRLQEAQVSDISKEILFK  
LERIIRNKKGGVGVVPHGVVCSGCHMILPANFVNEIRDSESNVHFCPYCSRILFYEEVK  
DESGFLGDIESGALADLAFDTEEEEEEAEDEDVAESELEKPKASKKKASKKKAVIADDF  
LMDQED\*

>SPSA8\_v1\_160002|ID:41145402|rpoD| RNA polymerase sigma factor RpoD [Spirochaetes Bin 1 SA-8]  
MSDMDLDPASKLLEYAKEKKSISFDELSDFLPESVLNSEKIDGILALLESNNIRLEEE  
IQIEDEQTLKKELESKRLVNNKSGTDDPIRLYLFEIGKEHLLTAEQEVLSKLMEEGE  
EIIKAILRKSGLIPEFYQLTVKALKKELKDTSGQRKENTEKIAERRRLNQFYRDVIKDT  
LQELREYVDLKKKIIAKGGDIFADPDLVERREKLEKLQSTEIHPEEISSFSEKFIIAAK  
RIKKYRHEQDRIQRILQINEMRDIRVLGRNLTIKEKREEIEDRLGLKSDEIKEKIRQLQI  
TEKKLKELEASFESNCDQITMAREINRGRKMMKNAKDRLIKANLRLVVSIAKKYTNRGL  
HFFDLVQEGNIGLIKAVEKFEYRKGKGFSTYATWWIRQAITRSISDQARTIRVPVHMIEQ  
INKVVRESRQLMQKLGREPNDIEIAEQLGWPVSRVKSVMNVAREPISLETPIGEDEDSLL  
GDFIEDKEIENPSNQTDYKLLQEQIKMVLSTLPPREQEVLRMRFLDGDGYSLTLEEVLGY  
FNVTRERIRQIEAKALKKLRHFKRSQKLRDYMDH\*

>SPSA8\_v1\_160003|ID:41145403| DNA primase [Spirochaetes Bin 1 SA-8]  
MAKIPEATIQEIMDRNTFLAVYQEKVRLIKKGNKWWGLCPFHTERTPSFSIDAERGLFYC  
FGCHKGGSIIDFLMETEKLSFFEA VSDLAEKANVPLKLEQNGDTREESERFQLYEMYEKL  
ARAFHWLLINHDSGREALQILEKRGLSDKEIQGFLLGYAPADKNWLYGFLKSKGYSEEF  
ARTGLFSQRNRTFPLFADRIIFPISDPKGRHIAFGGRLIHGEGPKYINSPDTAIFKKQEN  
LFAFDKSMEAIKETGIAVICEGYMDAISFHAAGVRNAIAPLGTAFTPRQAQLVRRRAEKV  
ILTFDADSAGKKATERAISIAANAGLEVMMVASFRDFKDASEILEKQGPQALKKSLEYCIN  
AGVFLIQQARETFDLTSMGKARAVAFFYPYLDALDSEVKQNSFIEEVSRSFINSAAIQ  
ADYLRAKSKIPTARNLQKIDGRPILGNANGSARTADLVFMAAVALKPKQSFSRLSEMVKLE  
DLDDIRARDIYTALDQMYRDNPD SFSTARIVELIENESAKRFILEVAASGELDENIQKVI  
DDGALGVRKRSLEKKRYRLTIELERAMSDASGEEKKDGII NEFLKEKMLLDAELSKLKGE  
MNE\*

>SPSA8\_v1\_160004|ID:41145404| Aminodeoxychorismate lyase [Spirochaetes Bin 1 SA-8]  
MKKRHLILAAAGLIIFITIAALLMVLNAPPHVSTDLSAAGSEPVSVVFAKGQAVTFLAE  
ELAQKKLIRSSEFFKLYVKVSGNDSKLGAGSYRISRGLSTVQIARLFVDGKVTHTIRITIP  
EGYTSRQIADMLEREGITGAREFLEAANSPELLKEIGIPSQSAEGFLFPDTYMLSENTPA  
QEIVRLLSANFFEKLKKNVNGNAGIDGKDLLDKIILASIVEREYRKAEDAGKIARVFLNRL  
KIGMPLQSCATIVYILTERMGKPHPEKIFFSDLEIKDPYNTYRNRGLPPGPISNPGLTSL  
NAVFNPPENDYLYFRLSEDSGSGSHVFSRSFDEHIQNGISVKGY\*

>SPSA8\_v1\_160005|ID:41145405|surE| 5'-nucleotidase SurE [Spirochaetes Bin 1 SA-8]

MRILVTNDDGFDADGLAVLVSYLERKNSLPGNSDVWEITVLAPESESGVSHAMTLKKPT  
KVRKLSEKRYTCSGTPADCLIVAGLVVSEKPDVVISGINRGPNLGTDIIYSGTCGAARQ  
AALEGIPAIAVSCAEYKGDLDHYEACAAAFVADNLSALISAWQPDTFININGPSSIEENLEA  
VWAVPGRNRYIDQLKCFDGDAGGYMYCFLTEGRHERTPDPVSDHHAVMMSGKIAISLIAVHP  
VSAHDNRLNGKPFKVWA\*

>SPSA8\_v1\_160006|ID:41145406| Galactokinase [Spirochaetes Bin 1 SA-8]

MKDIFALHLAEYESAPEVIAVAPAVMKLLGEHTASHEGLVIAAPISYEMRVAISRKDT  
MRFFAADLNERKRSSAGNLKFKREDRWANHVKSVDYDFIRNFNIEARGINVTINGTVPPG  
LGLGISAAINMSAALAKTLYGLSLKNEELAEIACKAQSVFFEKPVSLVDYLAGTAPGLR  
SLSIIDLRSRRRAVQFLDESWKIILTDSKVPRASVEAELKQRHDDCRKCLQHIPGRSAK  
TLRDIKSELDELGMGVFPESMRRRCIHVVEEIAARAQEAEDALIRQDAPAFGRVINKSQAS  
LRNHFEISCPEIDWLAKRSLEIPGVLCRMTSNGFGGCVYSIMKEDALDAYRKRLEEYER  
IFGFKAPVYEISIKGNLRATLYNGNEP\*

>SPSA8\_v1\_160007|ID:41145407| conserved protein of unknown function [Spirochaetes Bin 1 SA-8]

MNFSAINGMLQLEHVQLAKKVERLKNECGQRPKGSLVLKRRGSQQYIYLVKRVSGKVVTE  
YIGKQDSWKAKGLMAKIAERRKYEDDLKLAELARLEKMMKASGVFFVEPNP\*

>SPSA8\_v1\_160008|ID:41145408| Maf-like protein TDE\_2348 [Spirochaetes Bin 1 SA-8]

MDSLILASSPRRRDILTALGIPFSIIEPIDIDETAHDHLPPEERVIRISEEKGYKARKLY  
EDSASLSSEMPCHSWLILSADTLVAVEDWDHNTWTTIGKPSSRDEAREMLEILSGRTHR  
FTGMTLLDCRTGFPYSKTVAASVTFAPMTDQEISWYLDSDWKGVAGAYRIQGGKSLFIE  
SIEGSWSCVMGLPIRELYGMLRDVRFSE\*

>SPSA8\_v1\_160009|ID:41145409|rpsB| 30S ribosomal protein S2 [Spirochaetes Bin 1 SA-8]

MAVVTMKNLLESGVHFGHQVKRWDPRMKKFIFAERNGIHIDLQKTIQAIKDAYDAVQKV  
VGSKSVLFGVTKKQAQTAIQKEAERCEQFYVNNRWLGGMLTNFSTIKKSIQRLKKIERM  
EVDGTFESLTKKEIASLQKEKTKLEKNLGGIKEMKDLPGILFVVDTRKEAIAVAEAQRLG  
IPIVAVVDTNCNPEGITYPIPGNDDAIRSISLFTQIIANAVIDAGASEGLKIIENLPSDE  
AEDIAADAADKDDVEIDINAYTAVAEDASSAAAEPADADELPLVDEDKLYETK\*

>SPSA8\_v1\_160010|ID:41145410|tsf| Elongation factor Ts [Spirochaetes Bin 1 SA-8]

MEIKASDIKNLREKTGAGMMDCKKALTESNGDFAAAEKLLREWGMAGVEKRAGRATNEGR  
IFIAEKDGEIAMVEIACETDFVARNADFIASGNKIAEKALAAKANGPTPELENMVKDIAS  
VIKENIALKRVFFLKAGAGEYLHSYTHGEGRISVVVKAASSSETFANDKVKAFIHDVAL  
HIAAFNPMFLDQSKPDASWVKEQQEIFAKQVELDEKMKGKPANVIEGILKGKLLKMAEV  
CLMDQGFVKDEKMSVAQALEAVKKTGLSFTIAGYTYVRVGENA\*

>SPSA8\_v1\_160011|ID:41145411|frf| ribosome recycling factor [Spirochaetes Bin 1 SA-8]

MDSTRTACEERMKKTIASLKDEFNAIRTGRASPALLDKIRVDYYGQKTPLSQVATVSVPE  
ARLVIQPWDRLSFLSDIEKAILKSELGLNPSNDGKVIRIAIPPLTEQRRKELVKSAAIA  
EQSRVAIRNIRRDGLEELKLLAAGGVPEDQIKKEEDELQKLTDSFVAQVAKVLEEKEKE  
IMEV\*

>SPSA8\_v1\_160012|ID:41145412|ispU| undecaprenyl pyrophosphate synthase [Spirochaetes Bin 1 SA-8]

MISKEHLPSHVAIIMDGNGRWATRNRKARTEGHRAGLETAKKIVEYASLTGIKYLSTYTF  
STENWKRAQSEVSFLMNLKHLRKELDIFYRDHQIRVVHTGNRDTLPADILEEIDSVSD  
TASFKGMTVNLAINHGGGRDEIIRAANKAIASGTRKLTTEEDIRNNLDSPLVPDPDLVIRTG  
GELRLSNFLWQTAYAELYFSEKLWPDFQIDDFMLALEDFSRRERRRFGGLK\*

>SPSA8\_v1\_160013|ID:41145413| putative Phosphatidate cytidyltransferase [Spirochaetes Bin 1 SA-8]

MTGNTKQROLLFFFIGIPTFILAVLFLPFWNNALFFLIVAALQVMAIYEMRGIFRAKAITI  
DAVRIAIFSFATSGAVFASSFSAKESRTQFSSLEILLIMSAVSLLLIAGQYAFIKKDDFE  
SALAEISASVFSFFYIGILGAFIVYTATCFPQKKEPVFLFTLMTFGNDSLAWLFGVTIGK  
RRDLFDVSPNKSIAGFIGGFLGSIFAGILGYFLFPEAGFSSISPLILMGALMGCAVIVGD  
LLESALKRSANVKDSGLVVPGRGGILDSSDLSLFSAPVVFVLSLLFGFFK\*

>SPSA8\_v1\_160014|ID:41145414|dxr| 1-deoxy-D-xylulose 5-phosphate reductoisomerase [Spirochaetes Bin 1 SA-8]

MEKKAKKIILLGATGTIGIQTLEYVEQANREAPGSFEIVGMCAHSNEKKLEYARFGTAA  
KLALAEKSETGRIHFSGKDAIRFLENTEADIVVNGIAGSAGLEASWHALRSGKHLALAN  
KESVVMGYRLLAQLANANDRMIIPVDSEHSALFQLIARIGRSDIASIGITASGGPFLNKS  
LRELETITPDEAVRHPVWNMGRKISIDSATLANKGLELIEAVRLFGRQDNVRVLIHPQS

LVHAFIQTRDSVLWPHVSFPDMRLPIAIALTWPEKTDLSYGNVDLAGKTLSENFDDSRF  
PMLKLARNALDIGEGGTIAYNAADEVAVHAFEAGLIRFTHISVVTERVLSASWPRLVDNF  
EHIREIDSHARETAKQFIQEIEC\*

>SPSA8\_v1\_160015|ID:41145415| Membrane-associated zinc metalloprotease [Spirochaetes Bin 1 SA-8]  
MLTILAGLIGLSIVVIFHELGHFFAARSVGVVEAFSIGWGPKLVGKKWGWKTEWRISALP  
LGGFCKMKGEDDFKKALDLKLDTIPGSSDSFYGASPWKRIILFSGPLMNVVFAIIMFSF  
VSLVGITITAPNRIVLASEFNKTTEAHASSNPADLAGLQSGDIILALDGKTVRDYSDIQ  
ELIGFNPBKMDIEILRDGKKIATTTIPMLDKNSGQGLIGIYAWVDPVIEKIESGTSAEI  
AGLLPGDKVLSVNGQSVRNTIDIMKILESKEVIELNVERSAQRITKKLVVVYSDANSLN  
LGIQKFSFVRHDKAAGVGDALINGVSEFSKTFSLTIRGIGLLFSGVNVLKAISGPARTY  
IIGNAATESIKQSGLAGIVPILNFLAFLSVGLFIMNLLPIPALDGGQILLSEMIKGGP  
ISTKSIYRFQTIGMVMILALFLFATFSDVLFIFRAGQG\*

>SPSA8\_v1\_160016|ID:41145416|dnaB| Replicative DNA helicase [Spirochaetes Bin 1 SA-8]  
MIQNTQLKDKIPPSNLEAEQACLGALLIDPDSLTSVLRYSDDFYSLANSEIFSAIAL  
HEKGQKADLITLDELKLAGTLDKAGGPAYIASLTSMTPSAANVEYYAKIVQEMSTRSL  
IKLSSTVMSLAYDDSIETGPILDQIQSRIFEITQNRKTASYHSIKDLIPEIISIEELSQ  
NPNFTGIPSGLADLDAMTSGFQNSEFIVIGARPSVGKTALALTIASHIAIDLKIPAAFF  
SLEMSEHALMNRIIASEARVPXDRIRTGRLRTSDLDNDIMEAAGRIYEAPLYIVDMPNMKL  
LDLRTMARRLVLEKGVRIIFIDYITLITHENSDDLPRWEQISEISRSKALAREMKVPVVA  
LSQLRREAEGKQPNSDVRESGSIEQDADLILFLHREINKSADQRSEQIETDLIVAKQ  
RNGPIGKVTVLFKPAYAKFVSLDRREK\*

>SPSA8\_v1\_160017|ID:41145417|rplI| 50S ribosomal protein L9 [Spirochaetes Bin 1 SA-8]  
MKVILNQDVQNLGEIGDVKEVADGYARNYLLPRGYAVAHNSKNVSLFEKRKAEIEAIKEQ  
KKKSSASLKEKLEAEELALLMPAGANGKLYGAVTNAIADPELLKKGIEVDRKKIEVPGKA  
IKSTGNYKIIVHLYDKEEAIVKVAVAGHEVKAETKESSEDQPRKQVVKRTRAEHAEPATE  
EEQAAAFEAAINAGRNM\*

>SPSA8\_v1\_160018|ID:41145418| membrane protein of unknown function [Spirochaetes Bin 1 SA-8]  
MENRNRTHIQNLIDSVPGLVSGVLYLSYILSFAFLVPIQYSFASKGRKPLITVATAF  
AIVFGQLGRMISSGIAFGLVASAVLPPALFLVSMIYINGEYQAKKQSRLLLLAAIILS  
LISAPFVYLAVTNHEVLESLSMAVATLGGGSMSEELSTNARLAVQAATATISSAFSAFI  
LWILAVSYWLGNYASRIRMHEVSLEAAKSQTTLALADIRVPVTLLWPTLIVWASLFAI  
IVTKTGIIISAVITNASLFLGSLYAIQGIILSYLANHSRVFFFIKVLPLLLFLSFLNP  
TVGTIILIALPVLGITEVWFPYRNKGA\*

>SPSA8\_v1\_160019|ID:41145419|rpsR| 30S ribosomal protein S18 [Spirochaetes Bin 1 SA-8]  
MSDSRDMMEARAGRGSDQGDGRKDQDDRNGGVRKGRGFFKKKVKCFCTQKSKIDYKDDAD  
TLRRFTTERGKILPRRITGTCSKHQRSLAVNIKRARALALLPYVVK\*

>SPSA8\_v1\_160020|ID:41145420|ssb| Single-stranded DNA-binding protein [Spirochaetes Bin 1 SA-8]  
MRDINVVVLIGNLTRDAELKYVKNGTAVHFSIAVTRTRKQNDREWVDEPNFFDIDYFGKG  
AESISKYLLKGRMVGVEGELRQDRWEQDQARSKVSIVASNVKLLGSNPGSAGGGYAKPR  
TENSSSPSKAPAQSEQPDTAGFDDDDIPF\*

>SPSA8\_v1\_160021|ID:41145421|rpsF| 30S ribosomal protein S6 [Spirochaetes Bin 1 SA-8]  
MRQYELVVILPSEEEPFKAKESVTAIEAQFGAAEVKEEDMGRPLAYPIRKKERGHYML  
YKFNLEPNKVIPMERAFLNTNILKYLLVKVES\*

>SPSA8\_v1\_160022|ID:41145422|hisS| Histidine--tRNA ligase [Spirochaetes Bin 1 SA-8]  
MPAYIEPRVLKGFRLDYLPTAEIQRKCLIQKLETAFSHFVFPIDTPVLEYAEILLGKGGG  
ETDKQVYRFKDHGDRDVAMRFDLTVPFARFMAQHVEELYLPFRRYHIAKVWRGENTQRGR  
XREFMQCDFDIVGTDSASADADIVLTIITALKSLDIGGFMVRINHRGLFNRFLNKGMS  
KSSSILRTVDKLEKIGVQATRELLVAESDEKTADEILYFIHPEVEFQETLNKMRALCAAD  
DPLADEAYQRINAVYAIKKAAGFADCIQLDPSITRGLDYTGIVFETSLGKMPEIGSVCS  
GGRYNELANLYTDRKLPVGVASVGLDRLIAALETIEAQKSQQPCPAVLIGALDEALFADY  
HALAMELRIHGISVEVYPEAKKLPVQFAFAEKKKIPWMVLLDCKALDANEIPLRILANRE  
TRSFKSREGLVSFLKEQLASLNRESGQDNG\*

>SPSA8\_v1\_160023|ID:41145423|trmB| tRNA (guanine-N(7)-)-methyltransferase [Spirochaetes Bin 1 SA-8]  
MADTHPIRTFVVRAGRMTDAQKRALELHGSPFIIPYSNQKTDFFERFFNEEKPLVAEIGFG



MGQATWQIAIQHPEFNLYLGIEVHTPGVGRVLVMEIANHEIKNLKIIQHDAVEVFENMIPDA  
SLAGIHLFYDPWPVKRHHKRRIVRPELVSLFASKLAPGGYFYFVTDVEEYALASLSVLS  
ENSQLRNPFEFGFAPRQAWRPETKFEKRAKTAGIEKAAWELYFLRTGN\*  
>SPSA8\_v1\_160024|ID:41145424| Helicase-associated domain protein [Spirochaetes Bin 1 SA-8]  
MARKAKFRYYSNMIPHELPHYVQQKEKILSALEGNQVIVVESPTGSGKTTQLPIILHEAGY  
GDHGIIGVTQPRRIAVLSVSDFISRQVACKVGELVGYKMRFEKDTGIKTKIKIMTDGIXL  
QELKLDPYLSKYQIIMVDEAHERSLNIXFILGLLKKIIEARHDFKXIVSSATINAEVFSE  
YFGECPIVKIETQTYPVTVIYDPIVDRAEQNKEAESNVLRYSDEALYEKIHAVLLRTLEN  
RDEGERGDILIFLPGKTIKGCMLRLATSPIYPRHLVPLYARLGKDEQERVFDPAPEDK  
IKVILATNIAETSVTIDGVTVIDSGLAKLNYNPRFTTSSLIEAPIAKASSNQRKGRAG  
RTAPGVICYRLYARKDFESRPLFTTEEIYRTDLSEVVLMAELGITDFENFDFISKPPKSG  
IAGAIDVLNLLDSLNPDRTLSSTGQMMCAFLLPRLSRMIVEAIMKYPEVLHEVLVAAAF  
LSTMSPPYVLPQGQELARSAAHAFRDPMGDFITYLRLFEAFSAAPNKTKEKKNYLDERT  
MFEIVRIREQLEIIVSDMGVPILRGGSKFDYLCAVSRGLIQFVCARQERGLFRSLTAEKI  
QIHPSAMYRENPEFIVAGEIVRTRMYAMSVSPLPREILQKISPVLASRLLAIAPSGRK  
EERTGTKKPAKRS AEIMRGIPAKALADTSASRDFTNQIKIGSQVFDIKPAAGKRKKVILD  
WAKFKLVIPELDRDAGDGFKLLGCVYFNGYSLLDNEKLATIIKIGSWLSLDADFGKAWP  
RGGNFETVNQDGSVNAEGFQNLANHLHHVFQVVPKAKNEKSLGFVTLFTDGNNGNFWFKIS  
RGFHTALNESLSSLESLADIASKDSVSAAREKVGALYRRLSAFFDE\*

>SPSA8\_v1\_160025|ID:41145425| Citrate transporter [Spirochaetes Bin 1 SA-8]  
MSLYIPAVYAILLAFTGIASGKIPRLAMNRASIALTAAILLIVFRGITAEFAAIDIE  
TIALLLAMMIIVANVRISGFFTLAGSKILSIAQAPRSFLAMVVFMSGFLSAIFLNDTICI  
MLTPLVAEIALLSKRDGRPYLIALAVSANAGSCATIIGNPQNMLIASQSGISFLAFFLYL  
APPAILAMFLAYFVTIRAFPEEFKQNKQIKLHYGQTRVSQGSENEHIDKALIAKSLFAS  
ALLLFLAFGVRTSVAALISASTLLVTRRIHPEKVFLVDFTLLVFFSGLFILTSTVART  
PVFKNFLIDVLPMLHRPGGFFAAVIAVLSNIVSNVPAVMLLAPVAKSFSDPMTAWMLAM  
ASTFAGNLTLLGSVANLIVAEQAKKSSIRISFMDYFKVGFVPTIISIALGAVWLG FVR\*

>SPSA8\_v1\_160026|ID:41145426|xseA| Exodeoxyribonuclease 7 large subunit [Spirochaetes Bin 1 SA-8]  
MMNPYRPGKELESYSDDENPVMKEHGIFTVSSLTQMIRNNLESSFSNIQVDGEVSNKLS  
SAGHLYFSLKDREALIQAVMFRFQMNSLDFQVSDGMKIRATGSVSVYAQRGQYQLIVSTL  
RKQGVGDILAMLEERKQRLAREGLDFSEKKKPLPRLPKKIVVITSQQGAALHDILTVLKR  
RNSGIDVVILPAPVQGEDAPPVLVKRLHQANIFNLGDVIIIIRGGGSLEDLLAFSDESLV  
RAISKSRIPVVS AVGHEVDWSLADFAADVRAPTPSAAAEIVSENKEAIASQIEQFQDELI  
TSIKSRLNYAKLAIKSFSPQDIETFRSRLMPLARRLDDSIDSLRQSIKDR TINMLHTLA  
LLESNLESANPLAILNKGYAVVYRKDPKSGHLSKEPVSAAQDLQHEDVLAITFAK GKADA  
TVKEIYTDEKL\*

>SPSA8\_v1\_160027|ID:41145427| Exodeoxyribonuclease 7 small subunit (fragment) [Spirochaetes Bin 1 SA-8]  
MKSFEERLEKLEQLAEQIKDPKLPLEKAVSVFEEGINLSRSLKKELEAIQGGKIEILLNDP  
EDAENPKTAVLDIEDQ\*

>SPSA8\_v1\_160028|ID:41145428| ADP-ribose pyrophosphatase [Spirochaetes Bin 1 SA-8]  
VGEHRSVAGIAVRDGKILVGKRKAGGSIGLLWEFPGGKVESGETDEQALIREFLEEFNLM  
IMPIRKLGESSFLNRHGRSELA AWEVALPKTVSDDL SLIPLHEHHTHLRWVSMEELAALQM  
PESDRSLIETLSKQFSELY\*

>SPSA8\_v1\_160029|ID:41145429| putative YjeF-related protein [Spirochaetes Bin 1 SA-8]  
MKRIVSAAEARALDKRTREALAIEDVLLMEKASRLWSSLQKIILKEQPRFFVFLCGKGD  
NGGDGMAVARHAWSSGIEKEKLQVIVAKEAGGEASQLQLKSLKAIGITVTAWEKGCLENI  
ASKNSGKIAVIDSVLGTGASGQARGTVREMIDSINNL SGNLGRERVVVAIDVPSGLGDG  
WMEGFPIVRADYTLTLPKQALYHPAARLFAGEISIVEDIFPHTIVQTMSEGCLMETS D  
IPLNRVHLSNNA YKISRGRVTVFAGTVGTLGAALLCAKATQAAGAGYVQFFTQDEAYTLL  
VSAMPAIMAIPESAFYSGKLKADTIVAGPGWGKSAKHAEILKNLLELDLPLVLDADALRI  
LAADSSDFLNTIQKRTAPLVLT PHPGEFESLVQRYIAAPENLAF AELLARVAETLN AII  
VFKSHVTWICSPKGKAENRFSIWDGQCPLGTAGSGDVLGFLAGDLAIRSAANNKETYE  
LWELALESARQAVVCHGYAGRLLHGKQGWFSASELLPFLKKLACEVAENKNERLDGSKAS  
G\*

>SPSA8\_v1\_160030|ID:41145430| exported protein of unknown function [Spirochaetes Bin 1 SA-8]  
MIIMRIKAVCSILVVAALSSCAASAPATELKYTELKIGYGYSDSQITRNSFENRNSDK  
SAHSADNISLEARNGLYHILSGNNGKIMRFSSYGDLLLVIQDARYIKNLMNADTEKTEIS  
ENEEDKSRLSPRINPEIGFQQLSLLAVDSAGTMYVSDRLPPSVKTFYDEKSQAFSDAIVR  
RFSKDGTELGLGQEGVGGSPFPVMQGLRVTDDDKVAVISASSYSYHIFFFNADGSLSS  
LKISRSTIPLPDSSESSADSALASSLASIETLLPLPDTSPKPLVIKVDYQQLNDAVKNL  
QSWLFTIDASRGEIMQSIRIPANGKETEAPELIGVRGKRYLMLQKADAAGSGTASANNRF  
TLSILLENGVISKRYLVDLPKDVTEATNFAIGKDGLLYCLGFSLDYVSCLSWAIP\*

>SPSA8\_v1\_160031|ID:41145431| protein of unknown function [Spirochaetes Bin 1 SA-8]  
LNVSRATSIFTAMALNLLTAFVGSKKDRDIKTLPLLSVNERESWAMSLSDSEFPQKTE  
AFKKRIKDGESLDILLPEAFALAREAARRVLGERPFDVQILGGIX

>SPSA8\_v1\_170001|ID:41145432| polynucleotide phosphorylase/polyadenylase (fragment) [Spirochaetes Bin 1 SA-8]  
MVQTVRCQVGNETMVFETGRMAKQAAGSVFATYGGSAVIATACCSKDVTEGLDFVPLTVE  
YNEKYAAAGKIPGGFIKREARPKDKEILVSRIIDRPMRPLFDKAFGREIQVVPCTCISTDQ  
INPPDILAVNAASAAVHISSIPFAGPIAAVRVCLLDGEYIVNPTFDQIAKAKLEIVVAGT  
AVGITMVEGGSHEVSEEEMIAAIECAKEPISRLCAAIEELRALAGKEKLPLAPLTITLNR  
ADEIRAYAHEKLSKALFTKVKQERGRAVSQAIKETETAFAADALTDDTQKKLFSTLMDDLQ  
YEILRSSILDKGLRVDGRGLEEIRPITCEVGVLPRTGHSALFTRGETQALAITTLGTVFD  
EQILDDIEGDRRERFMLHYNFPFVSVEVGRGTGRREIGHGDLARRSVEAMLPPXX

>SPSA8\_v1\_170002|ID:41145433|rpsO| 30S ribosomal subunit protein S15 [Spirochaetes Bin 1 SA-8]  
MALTKEEKSQIILEYGKDEKNTGSIETQVALLTGRITYLTEHFKTHKKDTNSRRGLLKL  
GQRRKLLKYLQRTDLEGYRALVQKLQIRK\*

>SPSA8\_v1\_170003|ID:41145434| putative riboflavin biosynthesis protein RibF [Spirochaetes Bin 1 SA-8]  
MNILSWEEMTAQKGAVPRAVTVGVFDGVHVLGHQRLAKVADQDNSLCRTVVTFKKNPKKL  
LHPATYKGSFLSLDQKISSFEDAGMEACVLIDFSQNFGLTGVFEFLSGLAAGGAKYLCVG  
PNFRCGYKMDTDAQALVTICASRGVKAIELEPMHNGHPVSSSRIRTAILDGRLENEARAM  
LGREYEIPVMAIDNGSEAHLIFKTPEDAFLPPEGLYFVKCRDGKIEYEAEEAIAARRVCI  
HSTANRRWEKVAIVAMLSKE\*

>SPSA8\_v1\_170004|ID:41145435| tRNA pseudouridine synthase B (fragment) [Spirochaetes Bin 1 SA-8]  
MISGGFLLLDKPSGITSFSSLVGVKVFVPLRIGHTGTLDKFASGLMIVLAGDYSHLSPW  
FTGLDKVYEAIEFGIETDLDPEGEITGRSPPPDRASLESAIKHYTGPQKQRPPEYS  
HVNGKRSYELARSGKQVALTARDIEIYSISLQDYKENLAKMTVHCSSGTIYRALARDIAH  
ACGSLAHVKNLRRTRVGVFELQKAIPSEHLPHNEDFCSLTPQIAESLGLNVGTIPLEAEK  
AFLNGNPKALSQTLAAELRKS GDIGGGCDA AIFSENSAFLGIVSISRGKLA YRKVMP  
IPVGVVQ\*

>SPSA8\_v1\_170005|ID:41145436|rbfA| Ribosome-binding factor A [Spirochaetes Bin 1 SA-8]  
MDQIRLRLEELLREEISNLINRGEIKDPRVSSLXSVTRVEASRXGSHAKVWVSCLDSEN  
LSLDEAVQGLEHAAGYIQSQIARSVRLRLTPILHFIADAGIRDGFEMTEKIKGLVKE\*

>SPSA8\_v1\_170006|ID:41145437|infB| Translation initiation factor IF-2 [Spirochaetes Bin 1 SA-8]  
MTDSTDNSEKKVHLIKQPKPVTPEKPAPSSSAAPAADDEESSQEKKKVVVVKKKVVVKKPQ  
AKVLAHHDKEQSQPIETPGQTGAQEKPQKEKQVQHASLLKAQVEKAGEINQTAPAQTSTA  
SSESVHSVTDTAGNAAKADASSQPASPGSKTQSQQAPAEKFQSQGYQGQRSSSASSSNRG  
YQGSNYQDQSASGYNRNQPPQGYGGRPQGSYQGSYQGSRTGSSSGYQGSRSRSGQPGG  
YQGSYQGSNYQGRPSSGYRGQPGSQPSGSYPSGGYPGSRPSGYQGSYQGSYQGSYQGS  
GYPQRQVRPGSTGPVGRVGGYPAPGSQPRSGGYPSSSPGGRPGGYRPPQGAPGAGSRPGA  
YRPGAPGTGRPGGYAGRAPAGSPPPMESSKTAQRKTATKRKTTFVRREDELEKELQLKKK  
EESRAIAIPKSIDIMENITVSDLAKKMNIPAEIARLMKLGVMATINQKIDADTATILA  
SEYGCEVKIVSLYDETVIEKAAEKPEDLMHRPPIVTVMGHVDHGKTKLLDAIRKTDVSK  
EYGGITQHIGAYQVETPHGKITFLDTPGHAAFTKMRARGSQVTDIVILVVS AVEGVMPQT  
KEAIDHAKAAGVPIIVAINKIDLPEANPDRVKTQLSEMGLIPEEWGGTTQFCEISALQKK  
GIPELLDAILLQAEVLELTASYKQLAEGKIIESRIDQGRGIVATIIVEKGTLRIGDPFVA  
GIYPGKVRAMFSDK GARVDEATPSTPVEVLGFEGMPMAGDPFEVVEEKEYARAISLKRQE  
LKKYEEGRNVKKVTL DNL YETISAGEVQELKVIKGDVQGSVEALKGMLEKLSTREIRLN  
VIRAAAGAISEDDVMMAAASDAIIGFNVRPTPASKALADREKVDIRKYNIIYRVQEDIQ

KAMEGMLSPHELKEQDIGKAEVREVFVKVPKVGIVAGCYILEGIVRRNSQVRIIRESIEIFQ  
GKINSLKRFKDDAREVSAGYECEGIGIENCNDLQVGDILEIFETVEVARTLGQAVDNGSDQ  
TQKA\*

>SPSA8\_v1\_170007|ID:41145438| protein of unknown function [Spirochaetes Bin 1 SA-8]  
MRQKPLPHSLRPRVLKHKASKRQRKNSKAKDIRGSAHQALRPRTEAIREATIRINQHPG  
IIEISSRRAMAADRKVQDIRVRVIREEAAQGQALAIRVQAAQANQADTRDRDIRDPIIKV  
SGLLPVIADSLVLSHREAIHQAVIRGRAHLVIRVRAVIRREALLRAVILSAR\*

>SPSA8\_v1\_170008|ID:41145439|nusA| Transcription termination/antitermination protein NusA [Spirochaetes Bin 1 SA-8]

MASEMAEAIKRLINEKGISEDLIINTLQEALLAAYKKKFGSNENAIIRIKDNYEGVEVYA  
KKVIVDFDEFEDVETQIPLEEARKEFAEDAEGDILELPIDLKEFDLQSVMAKQTTRQNF  
RDISRDTLYAEYKSKQGELIIGYYQRENRNGVIYVDLGKIEGIFPKKYQSPREYHVGDRI  
KALIWEVEKKGKSLQIVLSRSHAEFVKLLELEIPEIYDKTIEIFKIVREPGYRTKVAVY  
SRREDIDPVGACVGPKGMRSQLISQELEGEKIDFLKYDVPDPRQFIKNALSPAENVKSVYIL  
DESKHMALAIVQEKELSAIGKMGQNVKLANRLCDWNIDVKTEEQYLQDSRNIELKKAAD  
SLFAVEGQEGEETTEEYVRLSDLPGMKQDWISAIQKANLDMVEDFLEKEDDELLAELGLK  
QAELESIKAIIEENFEIVQEEEEVVPEEEEEYTCPDCGSIVTPDMTHCPSCGVLSFEF  
GDDQQA\*

>SPSA8\_v1\_170009|ID:41145440|rimP| Ribosome maturation factor RimP [Spirochaetes Bin 1 SA-8]

MSVENEKNIEAIEAELLSGAGLQLLEFSLGRQKGNVVKAVIYSPKGTGTDECTKAYRLI  
LPRIQLATNNQNPDIENVASPGIDRLIKTKREWQAFIGNAVKVLEKDQTEWISGILKSADE  
TSVVLENRGGKTYEYTAIVKARLDSAYKGE\*

>SPSA8\_v1\_170010|ID:41145441| Phosphoribosyltransferase [Spirochaetes Bin 1 SA-8]

MMRFAQQLQKLLFPHYCVLCGSLNDKEDKGYPLCAVCESSLPVPGNNRCCRCGRPLISE  
IDTCMLCRQHAFDFRLIPLYAYQDEKAGALVRAKKGKRYSLARFWAAEIERVLKIEFG  
AAIIVPVPPRPEKLRSGEQDQVETMASMLEQRGFVARILARGESIQQKLNRSMRQESA  
RKAYHILETCKNAVPOKLVLIDDVFTTGATLDTCAKILKANGAEWVGAIVLAYD\*

>SPSA8\_v1\_170011|ID:41145442|mutS| DNA mismatch repair protein MutS [Spirochaetes Bin 1 SA-8]

MPERVMTLDQYRKIKARYRDVILFFRLGDFYEMFYEDAIEASALLDLTLTKRQEQPMCGI  
PYHAAKPYIARLLKAGKKVAICEQLTAPGSKGIIERDVIEVVTPGTSLEEDFLDHGSNNY  
IVSVCTLQKQCCIAYLVDVSTGEFLAYRHDNAHEDASQFLRSEFYRLNPREIIIQQSMYEN  
PSILLSREFESMLIEKRPDWSFDIEKASQYLKDRFKVASLKGFGFDDHAPELAAAGAVL  
EYIEENSKTRCPHRSILPYQKDDYLVVDEATKKNLEIVRNLQDSGKRDTLLFVLDRTKT  
AGGSRLKQWLLQPLRQKNRIERLDAVEHLYRDQLLLNEARRRLAAILDTERLTARLAM  
NKAHAKDLLALADSVHASLELTAFMSTLGSNQEIKPILLAIRLSPEQLEDCKLHVHSIR  
TAIKDEPSILLTEGNLIRNGWNETLDHLRNLKKNSTSVLEGYLEQERAESGIQNLIRYN  
KIIGYYLEVTKGKLDSVPPHFIRRSQSLVGAERYTTDKLADLESEINGATEKIIIELEKSIF  
LEVRENKQYIPSMEQLARQISEIDCLVSFAQAATEGGYCRPQLLEAPILDISQGRHPVV  
ETCIPQGSFVNSITLSTQGTYFALITGPNMAGKSTVLRQTALITLMAHLGSFVPADEAR  
IGLTDKIFCRVGAQDNLARGESTFLVEMHETAYILNTATENSLVIMDEVGRGTGTLDGVS  
IAWAVSMYLLERIRCRTLFATHYHELTSMEHPGLKNMSMAVLENEGEIVFLKRLKEGASA  
GSYGLHVASLAGIPAAVLENARVLQEKLRSFEHSLSLTDTVFKQAEKQAEQPASQKAKA  
GELFSAEDLALTRLRGLDPDSLTPQLALTIHELKSMML\*

>SPSA8\_v1\_170012|ID:41145443| putative Anti-sigma factor antagonist [Spirochaetes Bin 1 SA-8]

MENEQIEIGISDRRLVVRPIGHVTAKLCQVLKTRLFQMDAAGVKQIEFDMSACKYMDST  
FLGLLLIEKSARAHGFEPITMHQTNDVCRSLLSTMGMERKFIFADIPCGACKRLEILSA  
PRDVSAQFLLETHRELSQLSPENEEKFRLLTTLLEKSEGSDDRRP\*

>SPSA8\_v1\_170013|ID:41145444| Outer membrane protein [Spirochaetes Bin 1 SA-8]

MKRNPLRIYIIALVMIFGSASQTFSSQITRVAVLDIRVLSYYSKEAAALANFEKKA  
QAEVDKRSAEIKLLQSKKAEQAQRNDQELASSLDLEIVRKTADLKEFLAARQNELDLLAK  
ALSSSSFLQRLNSTIAKVAEAEGYSLVLMKPKDQDQANLVLWNSPSIDITDKVIQALAV  
K\*

>SPSA8\_v1\_170014|ID:41145445| Outer membrane protein assembly complex, YaeT protein [Spirochaetes Bin 1 SA-8]

MNMKRAFATLIVLLAVLSAAFAQETESDWFWNKPISSVQWEGIRRANRNELDALMKS YIG  
QQFTEDLWLTIQARLYELDFWETIEPQAVPANDEKSRMILKFIVTEKPAIQSVRVAGNSA  
VRTSEILNVISTKGGEIFNSTKANQDDTAILKLYIEKGYPDARVSHQIQPVQNDPSQLVL  
TFQVTEGSQVALRSINFTGNASVSEKSLKAAVTLKEAALFQPGTFQESKLEESRKLIVDY  
YQSKGFVDAKVLDFVREIEKDPDTGKNWLNLTFSISEGKQWKFGGMEFSGNEVFDSEKLLK  
SLVSQKPGNMLNYKLLQDKQKIDDLYESGYIFNQISMKEKRDEASQSIVYQISIVERS  
RAHIESLKFSGNEKTKEYVLAREMPLEEGDIFSKSKIIIEGLRNLYNLQYFSAVEPQISQG  
SAENLMDLVINVEEMSTADIQFGITLSGLGQTGNFPLSGFVKWNRNLGGTGQNLAVNAT  
VSPTEQSLDTSFGESWLFQKRISRSGFLNITHNSQTTGQDILAFIFS NEDIPDPPTSLEG  
ANSWSGSISSIPAEYLMPYDNYSMSLSFSAGYTMRTAVGDLGISGGISSGLGMV SFDENK  
YRPYEKEMRETNTWLLTNKLFARFNINLDFWYNPSRGYFASQRLTAGFLGFERQHYI  
KSETKLDAYLKLFTIPLSETWKFSWVLAGHTGYQTLFAQPWTALSVTKDWVSLDGTFNAR  
GWKELYSTKGTDVWENSLELRMPLVDQMLWMDLFDV DAGAMKTQGGWLDMTQTTVPVPSAAA  
FGWKNFAFSTGFGFRFIVPQFPFRFYLVKRFTFDGSAFAFKTAGANFDFVLSITQPLY\*

>SPSA8\_v1\_170015|ID:41145446| protein of unknown function [Spirochaetes Bin 1 SA-8]  
VVKFSGSHGLFGEVALEKGVVKGKVAEGLPVVLGEGVGRFGFDAEFYGGAGDWEVQGK  
GLKVGYEGLQAVPEVMIEGYKADGKGFELAKIAIQSGTDIYDGTLRGSYKNN SMDELLQI  
EASFKNRSRVAERASLSYKNENNQLEALLKLENIDLDKYLPSLKIKGLAYGKIEAKGFFS  
LAALTQAIRDKQDLWAILPPATFEFDMKNGELQNA PVNLAGNGTFEGGNLLL NIPVLEIM  
RSKITKANLYLQIPTGNFALDSHLETNLASSLETDLGVSGQAIFSTAEGFALQSIKMAG  
NLKNMQYHETSILPWAFSGSYQNGNLNFQGGKGA VSLSMLADGTFDMQLEKDLPI LGRLR  
GILSPDGTVNANIENLQADLKSLGKYLSTKTFDIRQGI AKGNLTIKGSLEDPEIFGELTM  
TDAAVYSREL VQGLIGPFFAKV VINGKNIETMPTEIPLEQKVTVAATGLFDRWSITDLR  
FNVSTKPD SIIALSGKIAGITVIDAKAKVDLTL SLNDELVIAEGKLYLEKGQILIDPQGF  
LPENAPPVDENALAFR VKLAMTFGKQLEVFI PDNKIPLVKGFTNPSSFLSLQYDSNSQDF  
SLDGKVDLRTGYVLYYFRNF LKSGVIEFAENSTKFNPLITAI AELRESTLTGPVKITLS  
AEKSPLNLPRLTSVPFMTETQLIALMSGGVLALDTSKPLDIREAAIASSEFLPQFNIF  
KTFEQTVRKALGLDIVYIRSSFIQRWLLDLTKPATEPATEDPLARYLDKSELYMGKYLTD  
SAFLYAALKFTENPLVSSSRLRLDSEFGIELDAPFGILDWSITPSLSEGLVTGQKLSLS  
WQFQY\*

>SPSA8\_v1\_170016|ID:41145447| protein of unknown function [Spirochaetes Bin 1 SA-8]  
MTKKRGR LSTVLILALISAVLFAVLILPPIHREANYQIEKAVNQAVNLVYEATSLRLGYE  
YVMFTGIDHVS LHGLELFQEETSQYAVSRRKVASIKQLDFIFNPFAALFGRTSGILKEIV  
AEGSVIELFLEKDISIYNRLSAYLAKQAEQPSR LSVLLKDTDIVVHAGLVDV FHVNSSA  
VQISTKAGAPEISSPLIKADIRLSSIGLDTVFVDIFSIS SQAADFSSSH YQATADIAYR  
GISVRNLAIEADQGTGGVHCKVSPSDSLIAGNYDFKDLVGFSIQMANYIPSADVAGTEG  
LLKELLGLRYEGNIRGGYHAGSAGKGLWYSGEISARGAKGQKIDGVDVSDALAKIAGKGD  
GTGFSGEAIARQNGYEARYNGKIA YRELELGGKITLKGKDLLAEGLINGKSGNYSLKAGG  
EYSSGKEKLSFSADAVL KNAESYELKELKLG YGKEEVTGRGRGKLG GGLGFEGVIGYKGG  
EYEVSVGYGQGVV KFSGSHGLFGEVALEKGVVKGKVAEGLPVVLGEGVGRFGFDAEFRY  
GGAGDWEVQGKGLKVG YEGLQAVPEVMIEGYKADGKGFTVKRAAVSGKGYEVIGLVSGVY  
GQGGVTVQGS LTGKGQVMNGARYEVRVSYGEGFGKVRVGV LGYEAAEGLV VNGYVEAQG  
GLDLAKVMSGEY GELLTWRGEGQAGLVGKGYEVREQKFGIEGFKEGGREGVAIQLKGGGY  
SGTLAAGFDGQMRGEITLREFVPGTVVTA EAGVLKELGVLR YTGVV RAGMSGGESVKTG  
TSGMWEYEGDVTVQGAAGDLVFGVDVSETEVKLAGK GDSAGVRGEAVVRRGEAEARYEGVV  
RYEALELGGALRVKKG FEGAFDIAGKSGKYTAQGSVQAKAGAAWG IKAQVTEQADRYDI  
GLEAGFGKGRLEAAGSYGKEKGWYEAQLKAEGV GIEIRKLFELAGVGDAGLLAGVDGGT  
VSVEGSLQGQKKVSWVIGKAEASGSMKGT SVRISGKGIVGDEQSYELKELKLG YGKEEV  
TGRGRGKLG GGLGFEGVIGYKQ EYEVSVGYGQGGVKFSGSQGW\*

>SPSA8\_v1\_170017|ID:41145448|tmk| Thymidylate kinase [Spirochaetes Bin 1 SA-8]  
MAGKDTNFSVNNFIVFEGIDGSGTTTQMA YLASVFSRRKTPVFFTAEPTEP EGKLIRRI  
LKGELDADPGTV AHLFASDRYQHL YGKNGIIEHLQHGEIVICDRYV LSSLAYQGISCND  
LPRYLNARFP PGLTVFFRIEAGKAMQRVQRRQELEIFEKLPFQLAVEAA YEAEIASAMQ  
SGWKIEILNAEESLENVSRQLVEIIDRHLSESA\*

>SPSA8\_v1\_170018|ID:41145449|queA| S-adenosylmethionine:tRNA ribosyltransferase-isomerase [Spirochaetes Bin 1 SA-8]

VKTDDFNFDLPERLVAQYPVKERGSRLFVLNRSTGQYEHSM AELARFIEPGTVMVFND  
TKVRRARLYGSAIETGAMVEFLLLEPVADSTGKADASLILENKGSQ LWRMTSKVKRQRK  
GRRYSFPEGLQGIIVEELGEERVVEFSEPISEA YLERNNGHIPLPPYIKRNDEAEDAQRYQ  
TIYARNTGSAACPTAGLHFTPHIMDSLLERGIELRWVTLHVGLGTFLPVRSETVENHVMH  
EEWYHVPHETADAVNKAKAEGRKVLSVGTTSRLTLESASQSGELKAGAGSTSIFIYPGYQ  
FRIVDQLFTNFHTPKSTLLMLVSAFAGRERILSA YEEAIRLEYRFFSYGDAMLIR\*

>SPSA8\_v1\_170019|ID:41145450|ruvB| ATP-dependent DNA helicase, component of RuvABC resolvosome [Spirochaetes Bin 1 SA-8]

MKNENSKMDPQFDPLEDEKEATLRPQILSEFQGQARLKENLSIFIRAAVERKEALDHLFL  
MGPPGLGKTTLALVVA SEMGVDFKPTSAPALEKPKDLAGIL TTLRPGSVFFIDEIHRLKP  
AIEEMLYIAMEDFELDWIIGQGPSARTVRVPVPPFTLIGATTKAGMVSAPLSSRFGISLR  
FDYYSPEEELVLRSSRIL AIDITDDATQLLASTSRGTPRIANRLLRRMRDFAQVAGSD  
SITRAIVADGLNRLEVDDLGLERIDREILKAILKYAGGPVGAETLAITVGEAVDSLEDY  
YEPFLIQAGLIARTPRGRIATPLAYKHLGLETSRENGRFQF\*

>SPSA8\_v1\_170020|ID:41145451|ruvA| Holliday junction ATP-dependent DNA helicase RuvA [Spirochaetes Bin 1 SA-8]

MFNRIVGILTGCTDESLFVMTAGVEWDIAV PARAIPLFGPVGEETE VFTWLHHFEDGMRL  
YGFPSASERLFLDLVKVEGIGPRQALKILSGIAPQELALALEQSDLKALQKISGVGPKL  
AQKMLVALKQGQLVELAEGTAAGAALHNASPSD VITALVDMGYDRKA VEA AVRKNADSV A  
ASDDKEKELFRLVLLDLSFGGSRQ\*

>SPSA8\_v1\_170021|ID:41145452|ruvC| component of RuvABC resolvosome, endonuclease [Spirochaetes Bin 1 SA-8]

MSVWQAPGAEEPGRIILGIDPGLASVGFVIREVSGRLLHVDHGTIQTSSGQPAQERLFA  
IYAGILTLIDSYRPSAGGIEGLFFFRNVSSALPVAEACGVIKLAFRQRAIDLSEFSPNDI  
KKA VSGTARA EKKQVQEMVKMLLGLAEIPKPDHAADALAAAICRAHFEGPSGLSIR\*

>SPSA8\_v1\_170022|ID:41145453|yebC| conserved hypothetical protein [Spirochaetes Bin 1 SA-8]

MSGHSHK WATIKHKKGALDAKRGQMFTKLIKEISIAARMGGGDPDSNARLRTAILKAKAAN  
MPKDNVERAIKKGTELEGSTYEELTYEAYAPGGGAMLIEVLT DNKNRAAAEIRNILTRS  
GANLGTSGSVSYL FKRKGVLT YDGEKYTEDQIMEAGLDAGADDIVNEEGSIIVYTD PANF  
ESVLNAMNAKGFETLGA EISMVPD TYVAADGDTAGKVQRLIDKLEENEDVQNVYHNIELP  
EVEE\*

>SPSA8\_v1\_170023|ID:41145454|mutS| Endonuclease MutS2 [Spirochaetes Bin 1 SA-8]

MMNWNDGIWMRMDEHTASLLDYMTVLNKTADYSVSPEGRELCLEMPPLKEPASLLQLKHE  
CELFVKALEEYPAPECGFPDIEIVLKKLAVEAMVLELEELHALSVWIRDY EKLLNFARKA  
LVFQSTEKQAKNGTENY TIESDMQYQDRLVPLSLLIQRAPSLNVVYKKIQEILTPDGQLR  
DLPAIKSIQTAIARKNKEILALSGSYSRNP ELRDALQSAEPTQRDGR TLLAVRANFKGRI  
KGIVHEVSASGQTVFM EPFDIMEKNNELVELDAQLKAEIRKILRTATEEIRPHRLFIEG  
RRITAWIDMRLARAIQAKRENLIFAQECSEGLTLWKARHPLL GKKAVPIDVLLPENIRTL  
IITGPNTGGKTVTLKTIGLHVLMNQA CLGLPAVVGTKLAIFDNVYADIGDEQSIDQSLST  
FSGHIKVISAIARNATK KSMVLLDELGAGTDPEEGCAMAMSLLDYFIRK GALTISTTHHG  
ILKNYGYTKPGCLNTSM EFNSASLSPTYRIAMGIPGESRALDIASGIGLGQEIVEQARSY  
LSKERTDIGELIRGLSEKHREIELLEREQRKKLKA AVEDQRKADLALLRVRQKELELKRN  
GLKDMKKLLDASRKTLENL VRELREHGTA VEKTREVKQFLTDLAETVEEKWTEL NQEETD  
LEKEAEEIDVPEADKTAPASAGELREGMLVFFGSYKQARLIRKEDDNTWLVEV GSLMR  
ASESDLYPLKIKQE QKPLLQIELAADSAGAPSVAVFQLDVRGMRLQDALRMVEKQLDAAS  
LQGLKLF SIVHGTGEGILGRGIHEFLKQNP AVADYYFARPEEGGFGKTIVRLGSD\*

>SPSA8\_v1\_170024|ID:41145455|rsgA| putative ribosome biogenesis GTPase RsgA [Spirochaetes Bin 1 SA-8]

LNGTIIATSNLSRVLCE DGTVRICTIKGKRIKTLIGSYNSLA VGDEVTIILQDGDRGQI  
EALQDRRTVFGRYNEKGRAEQAIANIDMVCCVTSPSLPPFRPRFIDRVA VLAE LAEVPL  
HIICNKCDLGLPPDVTDR LDGYRYLGYQVHLVSAETQEGIDGLKKALAGKLSVFAGQSGV  
GKSSILNALIPGLERKIQSVSVKYERGRHTTTMAEMIFSDSMRIIDTPGIRRLALRSLPL  
EALPACFP EIRALSADCALGARCSHVDE DGCAVKRAAEKGLIHPDRYESYLRIRSELSVP  
ETWKKEGV RDPGRKERA VNPGGTRRKGRFLRNFS AEHDDDELE\*

>SPSA8\_v1\_170025|ID:41145456|murI| Glutamate racemase [Spirochaetes Bin 1 SA-8]  
MYSVAFLDSGVGGLPYLQAAKEIIPGMSVQYLADNAGFPYGTKTASSLKEILADRVRRLR  
SRFLPDALVIACNTASQIGLTSLRKAHPDFPIIGTVPAIKPAAQETKTGRIGVMATESTV  
KDIYLQNLIAEHASDVEVIKLPQALVSFIEKKYLFSTPQERESKIKPYIDFLLEKKVDR  
IVLACTHFLHVEKDIEQYLAKAAANSVKVVESQWGVARRLAQILASCEAPAERAQENRF  
LLTSDPPFDPMYALWAERFGLSAPDKL\*

>SPSA8\_v1\_170026|ID:41145457| conserved protein of unknown function [Spirochaetes Bin 1 SA-8]  
MQIGFSAICPDCGKDLHVCLMCRFYAPGAHWDCRETIDALVQDKEKRNFCWFVAVNEKYF  
TKAGQVPAGIGKAESAkkkFDSLfKS\*

>SPSA8\_v1\_170027|ID:41145458| protein of unknown function [Spirochaetes Bin 1 SA-8]  
MFRTNQCAFPGCSRPAVSGSGFCSQHDSQDENSikelVRHIQREKSANVNDfSNLRLlGT  
DFSRIRFIGCRFSKAILSHVMFTGGfSfRLX

>SPSA8\_v1\_180001|ID:41145459| Tryptophan--tRNA ligase (fragment) [Spirochaetes Bin 1 SA-8]  
MERKRILTGDRPTGKLHLGHYVGLANRVRLQDDYECFFIIADLHTLTTKPEKEHIEELA  
ANVRSVLDYLSGIDPAKSVIYLQSAVPEVIELSLFFQNLITVPRLSRVPSLKEMAQSA  
HIEEMPfGLLGYPVLQAADILLPRAHLVPVGKDNVAHVEVTREIARRfNYLYGETfPIPE  
ALVSEYgXX

>SPSA8\_v1\_180002|ID:41145460|msrB| Peptide methionine sulfoxide reductase MsrB [Spirochaetes Bin 1 SA-8]  
MSGDFCKTTAVAAMVLYHYIFITMLVINSEKSARLILVIAAVAISAVFLHACSSPRSAK  
VNPAQENTAVQTPVPAQPQGGQLVILSEKEAADVCYVQPTEELKKRLSPEEYAVLVQAAT  
EPPfQNPYWDNHAAGIYVDRIDNTPLFASSTKfDSGTGWPSFWQPIDQNALVLVEDRSYG  
MNRIEVRAKKSgGHLGHLfNDGPNPTGLRYCINSASLRfIPKEKMAEEGFASLLPLVESR  
\*

>SPSA8\_v1\_180003|ID:41145461| conserved protein of unknown function [Spirochaetes Bin 1 SA-8]  
MELKPGIVAekTIIVEERHVA AHLGSGGVPVYATPSMILHMEETSrDAVDHLLGPRGATV  
GASISARHLAptVGMKVRVRSELVRVDGRLLTFKVEAWDEVEKIGeADHVRAIDLDRF  
GVKIAQKEALVGKTgKGS\*

>SPSA8\_v1\_180004|ID:41145462| conserved protein of unknown function [Spirochaetes Bin 1 SA-8]  
MTLEELSKLDYQGAMELMVAYSTDIKMQEKELEPLKKEAELWASRVSLAESKALADLAQA  
ARERHGQIQEKIIALENSILELKRdVARLKEALPGLKAKERSIDPDQLLAELSMMTGEAM  
DPEKAKfDREFAALEGSGAGTSAPQAEPQSSPKASPVDdtLAALKRKLGL\*

>SPSA8\_v1\_180005|ID:41145463|nadE| putative glutamine-dependent NAD(+) synthetase [Spirochaetes Bin 1 SA-8]  
MIISIVQMNSVIGDFEGNANKIVSYVNKACSRKSALPPPELVIFPEMALCGYPPMDLLDY  
DSFAEGLAGLRKLQKELPSSVAVGVGYVDRNRSGSgrALINAFSVIADGKIVFTQLKTL  
LPTYDVFDEARYfEPAKVRKVfTPQqARIGFAICEDfWWEAPPSPDFRYPIDPVKELLS  
SIDILIVPSASPFIAgKLKTRLRLARNTAREGHIPVLYCNSTGANDSLVFDGRSFAVDSK  
GDMIGMCGWEDEILTIDTTSMTAENLVLAQTARVQHLETILAREQPSGEPVPATVQNPVN  
QNEIEEIHQALIVGIKDYLDKTGfSKVCLGLSGGIDSALVAVLAAEAVGADNVVCIAMPS  
RfSSEGSMDAIELCRRNRHLEKLPIEVfPFTAfLSQLAVPFAGRPfDSAEENLQARIRG  
CYLMAWSNKNfNSILLTTGNKSELATGYCTLYGDMCGALAPIADLYKTEVYALSRHINALA  
RQAGKMDPIPEAIILKAPSAELRLNQKDQDSLPEYEILDKILVHYIENNKAFDEIVELGF  
DAALVRKVLLMTARAefKRRQAAPAIVSRRAFGIGRRLPLARAIYEADSI\*

>SPSA8\_v1\_180006|ID:41145464|gtI| Prolipoprotein diacylglyceryl transferase [Spirochaetes Bin 1 SA-8]  
MLLTLEFPawLKPEIIPGLPFRWYGLMYVIAfGLTWILfNRESKRIKAPWNEDQAANFFL  
WAIIGVLLGGRLAGTLIYEPTDYWRHPWFIFWPFDEGGQFTGFQGMsfHGGLAGVIVAT  
LVWCKVHKQRWIEWADILAVSVPfGYTFGRLGNfINGELWGKVtTRPWGMIFPYAERfSA  
KETWVQqIAEKtGISLNSLNDMVNLPRHPSQLYEAIFEGIVLWLVLWfFIRKkRlFPGLA  
AGSYVIGYGIARfFIEYfREPDAGLGYIIKLGSPDAPTYLfqTPLNfSMGQILCLLMILG  
GIIFLQVSARKAKLASLETsQNSARPTARKLRKKIK\*

>SPSA8\_v1\_180007|ID:41145465| membrane protein of unknown function [Spirochaetes Bin 1 SA-8]  
VfSILGHGALKHLDPIPSRLLDSRIMKRNPIHAIAAALTLARPYLAIDLmVRLGFANLDG  
ASGALFRYLVLPMAILPVTLAFFYyNEEKYRTFGSLALLMTGSSLVLLALAGFAISTNIQ  
AATLFGSVTNLVHGgFDfLFLlILDLSVSLTLGISLFRKEKKAPALESSPALRAELDTE  
PRKE\*

>SPSA8\_v1\_180008|ID:41145466| Carboxyl-terminal protease [Spirochaetes Bin 1 SA-8]  
MAGFRNEKTRTIGLWLIACVLVFLSFTSVAIPQASAQAASGSQDDAKRYSQLLQSIYQF  
ILQNYVDQVDPAVLYEGAMKGMFNSLGDPHSVFLDADMLSDLMRETDGKYAGVGLYISKQ  
PGAAGENETKYVEVVSPIEDTPAWKAGILPGDLILKIDGESTADLTVDQASNKIRGPAGT  
KVILTFRRGASYEFDVEFTRATIEPSIKTGSFEQNGAKYGYIRIIEWIPQTPEKIQEAL  
SRLVKEGISYLIVDVRSNPGGLSSVIDVSDLFIDSGVIVSTKGRNKQENFEYKAKPGVA  
VPSSVKMIVMVNKGSSASASEIFAGAMKDTRRALLLGEKTYGKGSVQQIFPLDKTGFKLTM  
ARYYTSPSGVNIKTGIEPDVSVPLVLSEKQMGLYEKLYTSGLIQKFAESNPAGPAERK  
AYAELHIAVEGFDIPQAFIEKMLRDEAEKTKPAQVFDLEFDVQLQEAIRILASSEFDSML  
QNSKTVEQLLSAKPDTGAVTQRQ\*

>SPSA8\_v1\_180009|ID:41145467| putative Ribosomal RNA small subunit methyltransferase E [Spirochaetes Bin 1 SA-8]

MRQLILPGDRTRDMCCTLDDKTSRYLVRTLRLQKVGDTFSALDETGTRFDCEISSIEKGRV  
VVLSARDSKDSNEERGGHAGDEPSQFESAGMPELILVQAVPKGQKFDLIRQAVETGVE  
LIPLLTRYCVVEERDARDKLAKLERRKKIVREALQQSGSTTLTEIAESVPIRNLAEQLA  
QRGIRPENSLFLLFHEKPLARQSLHEYCSRSVNSIVLVIGAEGGFSDEETALLEQSGFNL  
VHFSGPIMRTETAALFAIAAVKAIKLEKTIWKLRS\*

>SPSA8\_v1\_180010|ID:41145468| protein of unknown function [Spirochaetes Bin 1 SA-8]  
METLAIKSLLLDDVRLDFPTERQLGALISVWDDGKNHQIAFLDSAGHRQAQKVNEYASMI  
ASSDLVLPVSGNLVERASALQTSSDAGACIHERLFPPIRQHIEYVDYHFLSQDEPAAFRP  
YNALKVLNSSLSALEMKSGTVFLLGGENAILQKAEMNLRATFPGLRIVGRAPGNFSAANE  
AAIILAMQKSTPSMIIAGSHLETGELWIPRHMCFVKSGIFFYKQSIMETLA\*

>SPSA8\_v1\_180011|ID:41145469| protein of unknown function [Spirochaetes Bin 1 SA-8]  
MLTVIYWDCVACRIRKVTDILQKHFSVLSVPTFADITKHQPIQSVCAVVVGCNDSCLEKV  
SVSIEKLNKSIPLPIFMISESIMPDTKKTPDGVFFCNSSSVLQGEKIQDIVLGNPAAEI  
ARSVMPSFLGKSAAIRNVIRQVEQYAPFDNPVLILGETGTGKELVAHALHENS MRKGP  
IPLNCSAIPETLIESELFGTARGAFTDAVYRSGAFSRASTGSLFLDELGSMMLMVQPRLL  
RVLESGEFMRVGGIEKESDFRLISASCRNPLDLS DAGLFRHDL MFRISDLIIMIPPLRE  
RREDIIELAHHFCAELSMNRCGLSENALEKLYCHNWPGNVRELRTVISRACVHTREGAIT  
EREIMFHSEFKNILKDCPLG\*

>SPSA8\_v1\_180012|ID:41145470| RNA methyltransferase, TrmH family, group 1 [Spirochaetes Bin 1 SA-8]  
MTAGHNISIVLCRVKESGNVGSVCRAMKTMGFSKLVLADCPDYEEEEKVRMMAVHAFDVF  
HAQHVSSLDLALSSALSAGFSRRKGEHRKSFMSLRPFIRSRLLSLPSDTPVSFVFGNE  
RDGLSDELALCSLGVSIPTSEFPSLNIQAQVQIACWEVFSFAFQDSESSEFRAAEQKPT  
VPAKTIFLSRAQVDERTAAISTSLAQIGFFKSSDEYARRFFRDMIERAQLSKLEADYLA  
QIFSKAAILASHEGKPRRKIPHDRNESTSNFTA\*

>SPSA8\_v1\_180013|ID:41145471| Short-chain dehydrogenase/reductase SDR [Spirochaetes Bin 1 SA-8]  
MSIQEQEEQHKTPESESRHSVFAGKRALVVGSGGIGRWLSKILAERGASVFIQGAHESK  
VAGLVEEIKRAGGTAEGCAHDIESASEFCALFEGYGDFFDIVISAYGPFLQKPLTQYSPQD  
WEHLVGHNLALPGALASLFLPGMLHRNFRFLFFGGTRTDALLTYKTNAAYASAKAGLNV  
LVKSLAAEGRDRNVASLLVCPGLVDSEYLDTAAREALCAKAPGGKLIIPARTVAETALNLL  
DADPCAASGAIVSLDSGFSPS\*

>SPSA8\_v1\_180014|ID:41145472| protein of unknown function [Spirochaetes Bin 1 SA-8]  
MGSRLAKARNSIVPENGDKAADASPEILTAHAAEHSKVNKASSLRGKASQLREIRES  
RSQTHNGYFTIETLGSHPDVLIVHPLKPLQIDTVQSMHAELLKTIDSFRSILVWDFSTVE  
NIDAAGVGMIAVQKKLREQSGDQALSGLRPRLMRFIAMLYADYFCVEPDIPHVLDRIE  
EETSGIFPLMATCPACGTGLQISEPGRGRCRACGAVLSIFSNGSVELG\*

>SPSA8\_v1\_180015|ID:41145473| conserved protein of unknown function [Spirochaetes Bin 1 SA-8]  
MIVQSRVEEYLIDLGISYQEIADAWLIEDEEKGLPKMVSVTDPIVIRANVMPIPEKN  
REALFELLSLNARDFLHGAYAIDGNDIIALDTLEYQNMDRNEFSASLEAMAFALSQHYP  
KLSVFA\*

>SPSA8\_v1\_180016|ID:41145474| conserved protein of unknown function [Spirochaetes Bin 1 SA-8]  
MGIFDRIKTVISSNINDLVTKAENPEKMLNQMIIDMNEQLIESKKA VAMAI ADEKRLERE  
VVENKAKADEWEKKAVLAVRANRDDLAKEALLRKQEHESYVGQLATQLQAQKESVEKLD

SLRQLQTKIEEASRKKNILIARAKRAEAQEKINKTMSLSGNKSAFDTFERMAKKIDEIE  
ARTEAQKELEDTTSGASLEKQFAALESPTAADAMLEDLKRKLLTEDAGGSAQK\*  
>SPSA8\_v1\_180017|ID:41145475|murA| UDP-N-acetylglucosamine 1-carboxyvinyltransferase [Spirochaetes Bin 1 SA-8]  
MYKYVIEGGYPVSGKVRASGNKNAALPCLAAATVLANSPTLRNIPEIEDVIVMTEVLRYL  
GAGIQHPEANVWIVDPRSINRFDVPSQARKVRASILFAGPLVAKFGSALLPPGGDTIG  
RRRIDTHVLALEELGAKVSVKEFLEFSAKSLHGTALFLDEASVTGTENAIMAAVVAKGKT  
VIRNAASEPHVQDLNMLNAMGAHIDGIGSNVLTIFGAEKLEGTDFTIGPDYMEIGSFIG  
LAAVTRGELTIEGVNPDLLPPLKVGFSKLGISWTLSTLFPSSQSLKVVNDISGQIPK  
IDDSPWPGFPPDLTSIMTVIATQTHGTALIHEKMFESRMFFVVDKLGIMGAQIVLCDPHRA  
VVSGBPALSASVLVSPDVRAGMAMVIAALCADGESTIHNVYQIERGYENITERLRNIGAH  
IVRREDS\*  
>SPSA8\_v1\_180018|ID:41145476| putative Phosphoserine phosphatase [Spirochaetes Bin 1 SA-8]  
MMSNIPAGQAEPISVSESYALDTMAAELLAYFELNVESKKRELMRRAAMLARDLYSDTP  
VPAKRSVFLFRIISLLNRLHASGGSDFGDSISQLLAKTVCSARTAVQVIHAGLHAEKKT  
HFFGHGEHLPFEREIESYKQILLALDPMLADAIQPVLYRLEHVPRAVQSGDELLTWLGL  
VKNEDADTGQEYRGPEPERVSGAKQISIAREGKLETYSLRDGFQLPDVIITDLYSAGFAG  
FEIQELLKSFSRLADIPVIILSPLLDRIIARAIQLGADDVLRYSVEPSVFFARIESSIE  
RNKMREKHRVNVMALAKTRARLEAELKSGAEYVRCLLPGKIKSPLLSTDWIFIPSASLGG  
DLFGYHRLMDGRISVFMIDVSGHGVQSALYSVTIFDTRLRLEGLRNTDFGDPASVLRSLNH  
AYRMEERNLLFTVWYGVWDESRRTL VHASAGSPPAVLILPGGGAVELKSPGLVAGADPD  
ADYENMSIQIPRNSRLFLFSDGIYEFPAQDGEIFGLEAFVQLLEKMAVSASETMMMSVGEI  
IARVKEQGRVVRFEDDVSLLLEFSFG\*  
>SPSA8\_v1\_180019|ID:41145477|pyrC| Dihydroorotase [Spirochaetes Bin 1 SA-8]  
MKLKIRKPDFFHVHLRQGSRLKDYVVREARYFNALVMPNTLPPITTPEMIAAYRSEISK  
IIADSDPDCRMTDFTPLMTFKLLPGMKGELVQSCARAGAIAGKYYPQGSTTNASDGPSKP  
GDIQEALDAMEEAGLVLSIHGEDPSSPVLEREQRFLPTVEYILERWPKLVVLEHLSTKE  
AVEFVKNGPDRLAGTITAHLLFTIDDMIGESMKPGLFCKPVLKTGADREALRHAVCSGS  
LKFFFGSDSAPHIDTKRREASPAZIYSAPTAVGMLVEVFRNLGSFAELENFWSKNGALF  
YGLPIREDYIELTQEDWVPEEIDGAIPLGSGTKLSWK\*  
>SPSA8\_v1\_180020|ID:41145478| Xaa-Pro aminopeptidase [Spirochaetes Bin 1 SA-8]  
VTTLHSIYQTRKKVAQVLKQRGIHAVRFMDFESMRNPAIRYLCGHPGDALLIISSEKA  
ILVPWDVNMAEKMAFADLILPYTKFGRSAIAATRSVLQELAIPEGGSKIEVSEATAYPDYV  
DLVSELEAWDFICEKGGIDAIEILKMRAAKDEGELEIYERASALTNYLIDAIEQVKSGEI  
TTELDAALEKECRTHGAEKTFGDTIAAGPSRSFGIHFPSYGSFPFATKGLSILDFGI  
VVDGYTSDVTMTFAKGPLNKEQEKMMLTLVQQA YDLAVAACKPGIRSRDIAMLVDDFFKEA  
KMTMPHSLGHGIGLEAHEAPGVNIRDDNDAVLVPGHITIEPGLYHPEFGGVRLNDVLI  
TKDGGKVLTSRIVRL\*  
>SPSA8\_v1\_180021|ID:41145479|argD| Acetylornithine aminotransferase [Spirochaetes Bin 1 SA-8]  
MSAQTIKTDRFMNTYKRTGLVFEKKGKAKLYTADGSEYIDFTAGIGVNALGHGHEKLVAA  
IAEQAQAKVIHVSNYFLTEPSIKLAEELTSLTG YDKVFFCNSGAEANEGLIKIARKYGSSR  
KPDKNVIVTLKGSFHGRTVTTVTATGQDKFHQFFGPFTPGFVYVEPDNLSALETALDTV  
CAFIFEPIQEGGVRLSTQYLQAAEKLCHERDILFVADEVQSGVGRGTGAFLACEKLGVR  
PDMTAVAKGLAGGVPVGAILARGACAETLQPGDHGTTFGGNPLAAAAARAVLKELTQPGF  
LAEVERKGEKLLAAVRSWQNPLIKEVRGMGLMVGIAVTCPPSDVVAQCRTNHLLALTAGE  
DTVRLPLPLVITDEELDAGIAILKSSLELAQRA\*  
>SPSA8\_v1\_180022|ID:41145480|argB| Acetylglutamate kinase [Spirochaetes Bin 1 SA-8]  
MITDTMRADVLLQAMPYFKAFSGKTVVVKYGAAMINEGVRVAVIEDMILMQQV GIRPVL  
VHGGGPEIDKMLKKLGKERIFIDGLRYTDDETMEIVQMVLSGKVNKDLVALIENAGGKAC  
GLCGGDGGLFRATRLLKDEKDLGLVGEITSVDGAAVSSLLNAGYIPVVSTIGLSDDAEAL  
YYNINADTAAARLAAALGAEKLILLTDVPGILTDTSDAATLLSKIRKEEVANLIQQGVVS  
GGMIPKVEACVEALHSGVTSTHILDGRSPHALLIELFSDQGMGTMIIV\*  
>SPSA8\_v1\_180023|ID:41145481|argJ| Arginine biosynthesis bifunctional protein ArgJ [Includes: Glutamate N-  
acetyltransferase ; Amino-acid acetyltransferase] [Spirochaetes Bin 1 SA-8]



MKQVRGGVTAAKGFLASGMHVGIKRNKEKKDLALVWSERMCAAAA VYTTNKVKGQPLIVT  
REHLSDGKAQAIIVNSGNANTCTGEAGIAAAKRMAALVAERLPVKPEDVVVASTGVIGQL  
LDVSVIEAGMDSL VAGLSKAGYLDAREAIMTTDTVKKELAVQFELKGKTVTIGAMAKGSG  
MIHPNMATMLSFITTDCAIDQGLLQKALSASVRRSYNRVSVGDGTSTNDMVVILANGMAE  
NPIITSADDDYQEFYEALDWLNIQMARAARDGEGATKLIIECVVEGASDEEKAQLAKGV  
ICSSLVKTAFFGADANWGRILCALGYTRNDFDPGKVDVSFESASGYISVCKNGAPLPFNE  
EKAKKILSYQEVTVYVDLHEGDAQATAWGCDSLSEYVVRINGDYRT\*

>SPSA8\_v1\_180024|ID:41145482|argC| N-acetyl-gamma-glutamyl-phosphate reductase [Spirochaetes Bin 1 SA-8]

MFENQISAGILGATGYAGAELTRILLGHSKIQTLFLSSISFQGQNMENVYPSLLNCGNKK  
SPIFGTPLVLESADSVIEKSDVIFSCPLPHGHAEKAGEACINQGKLFIDISADFRFQDDEA  
TFSAWYGKVVYANKELHNLAVYGLPEMNREAIKKAKLIANPGCYPTSAELGLMPALRHKIA  
DTSSIIIDSASGVTGAGREPSQSTHFPEANDAI SPYKIGAHRHQPEIDRYLSIMAGTPVE  
TIFTPHLAPMSRGIVSTMYFKLSVPLSIDELHEIYASFYKDEPFVRLPVGFSASNRTVK  
FSNFCDISLHLSNKKTAIIVSAIDNMVKGAAAGQAIQNMNIALGFDETEGLLTVPPAF\*

>SPSA8\_v1\_180025|ID:41145483|hppA| putative K(+)-stimulated pyrophosphate-energized sodium pump

[Spirochaetes Bin 1 SA-8]

MGMGTGIVIALFAALFSLLYAIRKARAIIDL PVENEDLVRIGSYIEEGAHAFLSREYYVL  
AFFIPIVAIFLAILQGGIRLQGAAFIVGALCSGLAGWFGMGVATKANSRTAWAAKTGIG  
EALAVAFSGGSVMGMTVVGLALLGIGSVLGVLLLILGQSAMVLSSEVFPILTGFSGAST  
VALFARVGGGIYTKAADVGADLVGKVEIGIPEDDHRNP AVIADNVGDVGDVAGMGADLF  
ESYAGSLIGCMVLGINMGSSAEMKIRLTILPLIIAAVGVLASLIGTLFVRMKPGKSPQKA  
LNAGLSAACIAIVLLFPVIRIVIGTESFGDDTIRGFGYLGVALSAVIGLAAGAAIGIIT  
EFFTGTD TAPVKRIAKACITGXAXTIIXGLGVGMLSTMPPIIISAAIAGSYFAGGLYGV  
GIAGLGMLLTLGIQLSVDAYGPIADNAGGLAVMAEMPPSVREITDSLDAVGNNTAAIGKG  
FAIGSAALTALILFSAFIAASGVTEHLISIMNP AVLIGMFIGAMIPFLFSSLAMDAIGVS  
AFKMIEEVRRQFRAKPGILRGEIIPDYKSCVDISTRSALKSMIIPGLIAIITPIVAGFAG  
GTALLAGLLAGATVSGVLLAIFMSNAGGAWDNAKKLIESRAEEGKGSVSHRAAVVGDTV  
DPFKDTAGPSLNILIKLMAIV ALIAPILRTMGR\*

>SPSA8\_v1\_180026|ID:41145484| conserved protein of unknown function [Spirochaetes Bin 1 SA-8]

MAEEKHLYLIMHPNHS LIASALEPEHFIRHYVQGSTRYFEGRLIFVEVDPTFRNPYFDID  
TAYSELKPHEDGRPKATKFIKSYRVLENMDFSALGKLYL CNSLGDYVALDYADYNPSLDT  
EEFRIMLEINPVRFIVLTKYNFKQFGAFITDPKNTKGAPKMMFFTQLEFRTEEF LRDFEEN  
PLIRCYVPGIHPARLRNAIMEVRNTPGKFKVGLSLDCPIDKISYKLLRDGFMFASQDGSY  
RYYPLLSLDEVEHRFYKYWKSM\*

>SPSA8\_v1\_180027|ID:41145485|mmnE| tRNA modification GTPase MnmE [Spirochaetes Bin 1 SA-8]

MPRTYFDTKSPIIALATPPGRSALAVIRLSGENTISLFSKCFSTPDKILNASGYTLHYGY  
FLEPESGEKIDEIMVA VFRKPHSFTGDNSIELFCHGSPA VVNRILSILELQGCKPALPGE  
FSFRAFINGKRDLVETEAINELAGARSETARSDALLRLTGILSQKFSELRKQMLDLLAEI  
EARLDYAEDEGPDQEIQWLERLHQY STELQLVSKSYIGGRLRQEGALIVLAGRPNAGKSS  
LFNLLVREERAIVSPEPGTTRDWIETWLEIAGFPVRLVDTAGLRPTEAIIIEAGVRRSIE  
LIQRS DILLYIVDGEIGLLEEDLQFLQQFPSALKLWNKTDSPRCKQIPESWIGITAKALS  
TAPILEKAI FNLLDRMSNPSLSEISETQNIISGDQSQKQKQKPRENIVAIAEERQKKLVD  
CLKSIEHAILDLQKSSFDIILDIREAANYLGEITGELVNEEIFDRIFSKFCLGK\*

>SPSA8\_v1\_180028|ID:41145486| glucose-inhibited cell-division protein (fragment) [Spirochaetes Bin 1 SA-8]

MKDYP AIVIGGGHAGIEAALALARLGTKLLITQNPDTIGKMSCNPAIGGLAKGNLVREI  
DALGGQM GILSDMTAIQVRMLNQS RGPVQAPRAQADKALYSAMARKALEIQPNLTIFMD  
TVVDIITDSSGKTIEGVITERGKKISADTVVLTTGT FMEAMLFIGPWQSGGRLGEPAAV  
GLGTALRKRGF PAGRMTGT PARIKASSIDFSKLT VQHGDSKKIYFSFLEKNYERPNI  
PC  
HILY TSESTHKAIRSXX

>SPSA8\_v1\_190001|ID:41145487| protein of unknown function [Spirochaetes Bin 1 SA-8]

MAVEGKPMGDDSYWSKYIEIPHTGDPYLFVFGATIVLQYLA YRMSVRKMEWLDELGVDEH  
GVHPDAPKNVSKSITVD\*

>SPSA8\_v1\_190002|ID:41145488| conserved protein of unknown function [Spirochaetes Bin 1 SA-8]

MRGFYGYGMGYSFPWWNIVSWVIGIGVIAAIIFFAVRSSKQKKPEVPADNRDALQILADR

LARGEITKEEYLETKELLER\*

>SPSA8\_v1\_190003|ID:41145489| Fumble domain protein [Spirochaetes Bin 1 SA-8]  
MTIGIDIGGTTTKIVGLSQCNEIHYTTVKANDPVASAAGAIGKFISVAGIKIQDIKRLAV  
TGVGSTFIKDDVLGIKAEHVEEFQAIGLGGGLKLSGAERALVVSVGTGTAIVHAEGRNARH  
LGGSGVGGGTILGLGKALVGISDFDNLAQASARGKVEGVDLTIGDISSRAVGSPLQNATA  
SNFGKMADRPSDDISAGIVNMVFQTVGMLAILAARAENDPAIVVVGNTMQIPMARQVLD  
GLYPIYGVRFIVPDLAQYATALGAALYIC\*

>SPSA8\_v1\_190004|ID:41145490| UTP--glucose-1-phosphate uridylyltransferase [Spirochaetes Bin 1 SA-8]  
MKGIIVAAGYGTRFLPATKTVPKELLPVGLKPSIA YIVDEFV ASGITDIISSRRKKAL  
EDYFDREIELESIFLKEGKLDKALIQPPEVSMSFVRQTEMKGTGHALLQVKNLVGSEPC  
VVAYPDDLHLGTVPLARQLISIYEQTGKCVLATHIEPGDVSRYGVDPKPDG VGVGRFIE  
KPAVKGKPSHEV SIGRYLYTTEFFDKLEEGWAQHKSGEYHSHYALDRMIEADKVAYCRIE  
GTRLDTGDPAGYLEAILHNAAQDPQLKPVLMKFFRSMQ\*

>SPSA8\_v1\_190005|ID:41145491| conserved protein of unknown function [Spirochaetes Bin 1 SA-8]  
MSTVVFEKLPALDYENACVALPKEYGTPAWEALSEVA AIRKALFSLLEK LDAHEEIVSKI  
RGKPVVIKPNLVIVYSNIGTVKPEFPETDPRVIDALVLWLKQYTDITITIAESSGRGSPT  
RASFAISGLDRLSKKRGCEL VVLEERPCELYRLPKARVSRTL YIPDTFGKVARGEAFYIS  
VPKLTNLYTGVTLGFKNSMGIIPYNERQHAHHYDINRKL VEMMYLVKPDLTLDIGIIG  
NGPCPAPVYPVSSNMLIAGSNPVETDRAAVRFMGFDPKGIPLL TIADELGFNDDTVRIIG  
EAAPANGFSSPDYSLLSDRIIRHFPNIRVL YGIDKHGLGNPENS DVDVRAIEARCRGGCV  
ATTRFAFEMLIAEGKSSARQGTVIIGSGIDGYWLDASGKKYSVQDIAAL KGYKLCIGSCT  
KISISGICDQYVAGCMPLANAPHAALHKFTRTRCAILGFGNRHFPLFIKALLETRHARRKL  
LKAGATLDMDFPVIDSAAIAVEPGAETDASPPWQALSVPARTDPKTLKRQLRFEDDSLFA  
SLTGT FIPNRIPKALYRVQAVLTTLITISPLCAGFLALFGLLP GIPPSLLFSIFIGILIL  
HSFEVPFAIVAEAKRRRRKKLSQISTSSETSGRDAVKVMIKTMLIGYPAWLPEIQGIHDE  
DEAFGCRH\*

>SPSA8\_v1\_190006|ID:41145492|aor| Aor1 [Spirochaetes Bin 1 SA-8]  
VINNMGKILFVDLASGSFEERALSDSLYREYLGIGLAVRILLDEIPAGADPLGPDNILA  
FMAGALTGTGSLVTGRWMVACKSPLTGGWGDSNCGGNLSPA IKQCGYDGIFFKGIAPAPV  
IFICDAEGPRLEPAAELWGRDAIETELAIKAQWKVQKPAVA AIGYAAEKLSLISGISND  
GGRYAARSGVGA VMGSKRLKALVLAGNKKIGCSDPEKMHELSSRFSERVKKS NVPKFVSY  
RQLDLLGKMLGLPIVFRNLNGILSTAFFKKWG TIYNNTGGIVNGDTPIKNWAGSVRDYPKE  
KYEKINAHWVTDRETKKYFCYSCVIGCGGICDVSGIVENQGTADSSASHAHKPEYETHAA  
FGPMCLNDDENSIFICNDICNRSGLDTISAGSTIAFAIECCERGILTEQQLEGLDLRWGN  
SEAIVQLLKKMANREGVGAIFADGTRKAAERLSELTGGDVSAFAIHAGGQEPGMHDSRMD  
PLMGVAFSADPTPGRHTVAADVYYNVMRLWKKVSWAPAVPHIYLKKREYEATTEEARKAV  
ASTLYKQIADMAGGCLFAMIAGVQNWDLFDMLNAATGLK CSPDEYMEIGRRAQTLRQLFN  
LKHGVDPTANFIPLRLQGKPLPAGPLRGKQVPVPEMVSLYWREMGWDERNGVPLKQTL  
RLGL\*

>SPSA8\_v1\_190007|ID:41145493| putative pectin degradation protein [Spirochaetes Bin 1 SA-8]  
MEKIFFPDKEIKTDIIELGNI FRKIRAHDSKMMMVEVFFETGAKAPEHKHFHEQITYCIE  
GEFDFCVEGVSHRMKSGDSIYIQSNKLHYV VCHAKGRLLDAFTPQREDFLS\*

>SPSA8\_v1\_190008|ID:41145494| Permease of the major facilitator superfamily [Spirochaetes Bin 1 SA-8]  
MRLARKATIIMSEGQDTTISHALKGLFKVYGG LPRPLYALFGATIVNSMGIFVFPFLTLY  
LTARLGMSQSEAGKFMFLISLVYIPGNFIGGKLADK FGRKKLMVITQIISAALYPCGFQ  
VFSRYVPWLILASVLFDGITDPARSAMMTDLTKPDNRRAAFSMTYLGHN VGFAGSLIAG  
FLFENASSWLFWGN AIAIFAATAIVALTPETKPTQE QIDATIGSGSTEEAHEGNILSAL  
LSRPFLILFTMITTWFGFVYAQHRFALPLQTKAT FGLSGAAIFGSLMTLNATQVIFLSTP  
IMALTKKWKPINAVALS GILFAAGFAMIGVAGNIWLLYVSTFIWTLGEIVNATNEGTYVA  
NHTPISHRGRFQAILPLIGGIGWTISPPVIGSLIEKRSLAAVWPLLGHIAFASSVLLWLL  
GRIEDAQIAKKVKQLEFSDK\*

>SPSA8\_v1\_190009|ID:41145495|cda| Phosphatidate cytidylyltransferase [Spirochaetes Bin 1 SA-8]  
MRQETGTL LLREKPKES EADHRRHDEKLEPSIKTSSIRS RATPEEISIEVTRKSIHLL  
IALTPSLLAFSRTFTIALLAAGTLAYSIFEALRLRGIWIPLVSWLTSKAARLRDNGNFVT

GPVTLGLGALVSVLIFPPMQASIAIYILAFGDGFSSLVGKAFGRITLPLTDGKSLEGLSLT  
CFLTSFLSSYLVCQQLFASIGIALAATAVEAAPT KDWDNIILPLTAGVMAVILL\*

>SPSA8\_v1\_190010|ID:41145496| membrane protein of unknown function [Spirochaetes Bin 1 SA-8]  
MLSCVTLLVRRRTYWAVFLVSAFMLALVIAASIFLLIRKDVVFLIEHGAYKVHPFLGIR  
IPSFILSIFDIAVSVLFSFSISIFILKVFKKTVSAEIFFCLWVGTVAFEALRLVGLAAA  
ILDLSYIFISFIAKLYMGAKFLGLVMIFISGLYAAGMRSEKHFALVAGGIGVSVFFASIL  
PVNTGIFGMNLLYRIGYSRMFEGFSFAVILITVMNYLIAARLRSDRAYFMIALGIAGITV  
SYFLLSLDMAPAVSLISILTMASGSLLYVIRLHSFYLVWQ\*

>SPSA8\_v1\_190011|ID:41145497|proS| Proline--tRNA ligase [Spirochaetes Bin 1 SA-8]  
MPIPKLEQGFGKAGSIARQRYKMAEKITPRETDYSQWYIDIVLNAQLADYSPVKGSMVIR  
PRGYAIWERIRDEFDRRFKETGHSNAYFPLLIPMSFLQKEAEHVEGFAPELAVVTHGGGE  
ELEOPYCIRPTSETIWSMYKNWIQSWRDLPLINQWANVLRWEKRTRLFLRTSEFLWQE  
GHTAHETEVEAVEETLKMLEVYRDVVERYLCIPVIPGVKSETTEKFAGAVRTYTIEMMQD  
KKALQAGTSHFLGQNFKAQFDVKYQTRGGTLDYVWATSWGVSTRLVGAVIMTHSDDKGLV  
LPPSIAPEEA VIVPIYKND SKAAVLEYAGKIYSQLKALGLRVLDDDDSSSPGWKFAEWE  
LRGTPVRLEIGPRDMQNGKAVMVRDNGEKTVIDAAQAGEKVKETLALIQLASLYEKAKAF  
RIANTKPIGNRELLAFFGAEGMGTADAQGGFAEALWCGSAECEAELKAQTKATLRCPML  
DRQDNISGTCALCGAPARHRAIFARNY\*

>SPSA8\_v1\_190012|ID:41145498| putative Diguanylate cyclase containing PAS/PAC sensor [Spirochaetes Bin 1 SA-8]

MPLERMILIIIVEFLYFFVVFVSLTRRRNYLAQLFSLAVLAGMVYVGGYFFELGSQSVEEL  
QFWLKVEYFGLSFMP TLVLFVFAWKFNKQAMP SNLTMVIFAIPFVTLLSSTNEYHHLYY  
RQLSFVRIDGMSIAHIAKGPWYYVFTVYMNCIVLLSLAIFQVFRKNKSVIRAKAFWFFA  
GTLIVVGMELLYAFGLTPYGIDIVPFSFFFAVLCFAIAIFRYEFLKSNDLFKEIIFTKLS  
EGALLDQNGRIADYNDAAARMFWSLSPEAIGYRIQDLPVAKELLSQIEAGKTVNINCNG  
REFYYELKITNLKEQGAEMGKVYLFKDITRLRRIMRTLYRLANFDSLTVGVVRRRFFEEA  
EKELARSIRYKKQFAIFMIDVDNLKEINDTFGHQAGDAVLKALAKALKARLRKSDIFGRY  
GGDEFSMVLVEIDYLN SMLMAESFISMVRNLEISFHDRILKTTVSIGVMFFKGVESDMTI  
EHLLEADKALYQAKKEGRNRFVAAKPL\*

>SPSA8\_v1\_190013|ID:41145499| protein of unknown function [Spirochaetes Bin 1 SA-8]  
MADDYSVFRHPDLLKDAALRESPVFPDFESVYKADV KQHTIRNRILLA VFLCLTMAISAA  
GGFLLGSLSNFDGPLFAGKPLVTSWSLQPEMPAAQTREGEVGIYLAGLWDAASSTAVYQD  
R\*

>SPSA8\_v1\_190014|ID:41145500| RNA polymerase sigma factor [Spirochaetes Bin 1 SA-8]  
MEDKPRYFTLSQHEPSDET FDAELAAHAANGDRGAFERLVWRWWDRIRGFCSAIVGFDPD  
MAEEASQETLIRLYRSLKNLRKKSSVGAFIYAICRNAASDVMRRSARVASRQVSLEDLPG  
LELSASGETPEQGILRQDLQLQIRALRELDPTDRALIYLHEAEDASIQELARYFSLPEG  
TVKSRLYRARIRVARLLTEAGYGR\*

>SPSA8\_v1\_190015|ID:41145501| exported protein of unknown function [Spirochaetes Bin 1 SA-8]  
MRKSTRKILTAAVVFVLF FASAALVSAQMRPMGKDAVRGW FQNLRLTDQELQEIAKIIIEA  
DEAELARAQAEIKI IQSKIARLMLESAPDLDAIKEEIGKSAEYEKTIKFIQIKRQLEVKK  
VLGEERWQTVLMLVREARVSEKFGKFADSFSSKGMNPKDADRWGRMMLMLKRFM\*

>SPSA8\_v1\_190016|ID:41145502| conserved protein of unknown function [Spirochaetes Bin 1 SA-8]  
MDEVPRRLFMSRCLGFEHCRWNGEVINDEFVRQLEPFVDIIHECPEMAIGLGCPRDPVRV  
VRDGD TAELLQPATGRRFGPVMRSWAEEYCGNLEAPDGFILKSRSPSCGFKDVKVYASFA  
PESGSKPGTGIFGAEVVRAFEGPIEDEGR LRNF TIREHFLGAVVWTLARFRAVKKKAAMG  
ALVDFHASHKYFLLLHNQKEMRLLGSIVANLDDKPLSEVFSLYEIGLKKALASPPKYTSL  
INVVQHTFGGFSESLSKEERALFVN LIEQYRDERIPASVLLQLVRSWAVRFGEYLLKQV  
LFQPYPLSLVEITDSGKGRSY\*

>SPSA8\_v1\_190017|ID:41145503| protein of unknown function [Spirochaetes Bin 1 SA-8]  
MHTEELLFAADTARLMLESGGETYRAEECAISIITSQGGAEAE CFATATGLMLSFVSDD  
GKHTVVRRIKKRIMNLEKVYRIDRMVRDLKTDQIGFEEAESELDRIERLPERSGKTRIA  
AGAFGAFFALLFRADVREAF AAFFIGAFVALVRLSARLRMPDFIANLAGGRS QLSAPC  
CWFKSDSCIGRM\*

>SPSA8\_v1\_190018|ID:41145504| conserved protein of unknown function [Spirochaetes Bin 1 SA-8]  
VTIIGVIMLLVPGVAITNAIRDITAGDFVAGLARGAEFLAAAISAGTGGAFALWQILQ  
PFFGKGA\*

>SPSA8\_v1\_190019|ID:41145505| putative Membrane spanning protein [Spirochaetes Bin 1 SA-8]  
MLAPLYAAIATSAFSLFGLGWIDASIASCGAALGWAVYQWFPALHAEAFSVFFAALAAG  
LFSEIASYFRKRPATVYMIASIIPLVPGGGMYYTMLSTLEGNTAKSVDTGIATLMTAFSI  
AIGLAGANVIGRIAFGNRYRPLRSQK\*

>SPSA8\_v1\_190020|ID:41145506| Pre-sequence protease [Spirochaetes Bin 1 SA-8]  
MSFTLIEERQVQEIASIVRLYTHDQTGARLLSVINADENKCFGISFRTPPEHSDGVAHIL  
EHSVLCGSRKYPVKEPFVELMKGSLNTFLNAMTFPDKTVYPVASTNLKDFRNLVDVYLDA  
VFYPRITEDTFRQEGWHYEVDESTGELSIKGVVYNEMKGAYS DPEDLHADLCRRSLFPDT  
AYGLDSGGDPAVIPTLTYEQFKKFYQTYHPSNSFIFYGDDDPKERLALLDEWLAPYSA  
QKIESLPGIQKPFKPISLTVPFSSEENKAYTAINWALREHGQDEFNLAVGILSHILTGT  
PASPLRKALIESGLGEDLAGFGLEDGLRVSAYSVGLKGVAPERVGDVEKLIRTTLENLVA  
QGIDPDTIEASVNTIEFALREKNTGRFPKGLAVMLEALGEWLYDHNPIDALIFEPSLSAI  
KARLARKERYFENLIQTLFIDNKHASVVTLLPDSEIEARRSAKEAEKMAEIRAQLSELDI  
ANIKQEAHLKKLQQT PDSPEALSTIPSLALS DIPTQAPRIPLEIFENGGQTTLFHDLP  
SGILYLDLAFPPTHIESRLLPYLSIFGRALLEMGTDTEYVTLTSEIGKHTGGIGASAF  
ATRYGSAEASALTVRGKTLLENSEKFFSLEKILLKSNFSNRERFRQIVLEEKAAQAEAS  
VIPSGHRLIGLRLKSKLTRADWISERINGLENIFFLRKLAEAEHEWEAVEQDLRALRDN  
IITRNLIVNVTVHHENYSSLRTSIEGLISHLPQRGAQNTEGIVAAQAELEVSARQPG  
RAEALTAPTQVNFVKGAFPLGTAGARLPASFQVVKKYLDTTFLWEKVRVQGGAYGGFSIL  
DMNAGIMLFLSYRDPNLVDTLAIYDQAAEFSSLEISQEELTKSIIGTIGDVDSYLLPDA  
KGFTSMHYLTGYSQDIKQKTRDEILATGTHDFVKLADALRSALPQALEAMLT SKSTLDT  
LDS DQKAQLEISPLF\*

>SPSA8\_v1\_190021|ID:41145507| Mpv17/PMP22 [Spirochaetes Bin 1 SA-8]  
MKRGDFIWGGVFAAITAFLVIPETRHLFEATRSHPYIMGFIKFAIMASMGELLTVRMLQ  
KHWKKPAGFAAKAIVWGIIGMVIVAMFALYSDGVAGLLRRGLLYAGQGKIAAFLTALFTS  
AIMNGTFGILLMLSHKISDTYIDLRTDREKPNFQMTLKAVDWPAFFSFVIGKTIPLFWIP  
AHTITFLLPAEYRVLAAAYLSVALGMILAYAKLRNQEKK\*

>SPSA8\_v1\_190022|ID:41145508| ABC-type transporter, integral membrane subunit [Spirochaetes Bin 1 SA-8]  
VTTNDIKKMVRSNLRDYGMYIALALIMIIFTVLTKGLFISSRNIANLLNQSGYIVVLA  
MTLVIVIRHIDLSVGLAGFIGAVTAIALVSWKLPLILVLPGLVILGVLGGLTAYPVAK  
LGIPSFVTSLAGWLIYRGALLLVGTGTIIIDNPTFNALGNGYIPDIKSETFLPGVHK  
LTLILGALAIWFIAGQIRNRKSKMEYGFVDVLPDMFVMKLI FMAAILGFITWILAGYNG  
MSWTVVIMLIVVFA YDFITQQT VLG RHIYAVGGNPEAASLSGINVQKITMMVFGSMGFLT  
ALSGILFTSRLQS ATPQAGTLFELDAIAAA YIGGVSAAGGVGKVTGSLIGALVYMSLMNG  
MNLGTDISLQYIIRGIVLVTAVVFDVSTRKTKV\*

>SPSA8\_v1\_190023|ID:41145509|xyIG| fused D-xylose transporter subunits of ABC superfamily: ATP-binding components [Spirochaetes Bin 1 SA-8]

MSPSFLVVRNNVCGARNNEAGMETAILEMKNISKSFPGVKALSNVNFVSVQRGEIHCLVGE  
NGAGKSTLMKVLSGVYPYGEYEGQILFNGTEQKFKAIHDSEEAGIAIYQELALVPEMTV  
YENILLGNEIRKGAIDWNKTIQRATELLEKVR LKVN PATKIKDLGVGKQQLVEIAKALS  
HNVKLLILDEPTAALNENDCDNLLDLIVGLKEQGVTCIMITHKLKEVIRIADKVTVLRDG  
QTICTLDAHKGEVNVNVLIKHMGREIQNIYPAQETRELGSII LQTKQWTA FHPVTGRKV  
LDNVDFYIRKGEIVGLAGLIGSRTEFARSLFGNPDNYQLSGDLILKGKKA AFNHPEKAI  
KAGLAYVSEDRKGNGLILIQDIKNNITLANLKDIMKSWNVVNKNLEVKVAEEYRAKLNK  
TPNVEQKVVNLSGGNQQKVSVAKWLFSPKPDVLFDEPTRGIDVGAKYEIY CIMRDLAAQG  
MSIIMISSELPEVLGMSDRIYV VSTGRITGELPAAEATQEKIMHMATN\*

>SPSA8\_v1\_190024|ID:41145510| Periplasmic sugar-binding protein [Spirochaetes Bin 1 SA-8]  
MKRAAMLIASLLFLVVLGNAFAQVKVGIVLPTKDEPRWIQDQTRFLDALKTAGISAEVL  
FSQGDSAKERANVESLVSKGIKVLICPHDGTAAAAAADVANKAGVKVISYDRLIRGTAS  
VDYYVTFDSVQVGMAWGDYLVSKASGKGNLYLYAGAASDNN AFLFFEGAWKVLQPKIAD  
GTFIVRNSDKAVALSKKATLTRDEMASIIGQVTTNWNFADAKSKAEANLTA AKKEMKGTV

YIAAPNDGTARAIADAFADKDVTKYITGQDAEIASIQYIIDGKQSM TVLKDVRILVKD  
AIAAAVDLNGKVPPKTTTYNNGKVDVPAKPTMITTVTKENVKAAIIDSGYWPASNFKGL

\*

>SPSA8\_v1\_190025|ID:41145511|xyIF| D-xylose transporter subunit ; periplasmic-binding component of ABC superfamily [Spirochaetes Bin 1 SA-8]

MKIKIKKPLLLCAILAAGTFIVSCGGS AKKSQDKKL VIGFSLDSL VVERWKRDL EIFEK  
SVREMGADFIYEVADQDADRQAEQVRS MVGRGIDVL VIIPNDADKLTASVKYAKSKRIPV  
LSYDRLVRNAGVDLYV SFDNEKVGSLMAESLVQV VPRGNYVIINGARTDNNAIMLNTGMH  
KVLDPFIERGDIHILEEIWPETWDNEAARKGLEQVLSRTRAIDAVIAGNDMLAEAAINVL  
SENRLSTTRVVGQDAELAACQRIAEQS QYATIYKPIDRLALRAAGFAVMLAKKEKITTD  
ATINDGLKKGVPYVRLEPIL VTKPLLETVIKDGFHSRADVYRNIRSSY\*

>SPSA8\_v1\_190026|ID:41145512| putative Two component transcriptional regulator, AraC family [Spirochaetes Bin 1 SA-8]

VYRILVVDDEL PVASGIAHIIKRDFSGVYELAGIANS GREAVEKATR TAPDIILMDVKMP  
GFSGLEAIREIKVKG VNP SFIMITAYERFEIAREALELGVVDYLLKPVAEALALS LKRA  
EKYLENRDKLEK TSLILHELKEECKTLAAQNL IYS MVLTGTLSEQKARLLQSMLDMNTEAG  
IACAIYAAPADLDEILNDIQYKTSILAEKISPAILAAFIPIKNTEAAEASKEAFGELDEI  
LKRMQGALRGFGSLCQTAESPASWEAAIGNLNNTAQK KSGNSWKPLLALENELADSLQT  
GKTEPVLPLLEEIRICARASGLPSESEIGTFIALVGRVARELRERSCLSEEEAEDIMRVK  
SLCLGSSADMFAAEAERKIGLLLKHLEKAPGKYSRIVADAMSIVHNNYAKPLSLESVADA  
IGISPGRLSRLFAEETGQGF SRYLVMFRIDQAKKMLERPGASVKEVSAACGYPDQNYFAR  
LFFKLLIGTTP TAYMSEFARKTGGAHENKD\*

>SPSA8\_v1\_190027|ID:41145513| Signal transduction histidine kinase, LytS [Spirochaetes Bin 1 SA-8]

MMKNMKS KRKPDTVRSR MIRHSALILLIMMSATLYTGLASFQLADSVSVLFRN NLLMKDL  
RESLARTETSLTNYLTSKNSDALKEYIKNSTHLSDTARKLNQEIRNDESLLLQRDLARSI  
EQYIKTETS VSGKRGRDVQTYSTAYYESEKIADVIRFLIEKNEKVFIADSIAAFS NYKS  
VISPAVTTNAILVVAATLLGLMLLISYSYTLTEPLAVLAEAAANALGTGNYEAELPKPERM  
DEISVMATAFSTMRDNIKQSFNSMQEKAEME KSLMQERMHVLDMEHKLKDAELLALQSQI  
NPHFLYNTLSAGMGIAWEENADRTSNFLEDLAGFIRYALKPTFRTVLVSEELECAQRYIR  
LLQARFGARYQFEIHAEESALS AKTPALLQPLIENAI THGLAKKEEGGTIKVAIALDGS  
DVVMQVEDDGE GEMSEHEIARLYQELDTNHEPARKDGS GIGLRNVMRRITLSTNGAGVVEI  
HSRLGGGT VVTIRIPRKG\*

>SPSA8\_v1\_190028|ID:41145514| protein of unknown function [Spirochaetes Bin 1 SA-8]

MSGEEAASMLDSREPVNALICSSARDTIGAVQVVDRNAVGVKVLIVGTDETPEISR YIQ  
NGVVAASIVRDSSAIGRSALRAFSDMLSGIKNPARYESGFLVLDQQLKAALR\*

>SPSA8\_v1\_200001|ID:41145515| exported protein of unknown function [Spirochaetes Bin 1 SA-8]

MKKT MPLVFILLAILSSAYAQM YGYEQEIMQK KLRTDLGIDDFKFLGMRG IKISYLGDL  
QLYEIRFFSQKLYNISILPTAEHLGYFILNNGKFVYLLHNDTEIAAIMKTYFFGK KLS  
QETIEFLLFIYSQTANVWNENVYIIR SFGDLENPEFKKYYSNSNENYYTLKNSIINKYHD  
YQFPMVIDENDLSCTFYIISGWMHKIDTLQKITISVKNDTIEYNNELLEKDIYDNIPLIA  
Y\*

>SPSA8\_v1\_200002|ID:41145516| conserved membrane protein of unknown function [Spirochaetes Bin 1 SA-8]

MNPELSKNKIEHATPAFIFLSVLYGALLIISNITVVKLVKVGPFLLTAAFFTYPLVYVLS  
DIMTEIYGYRLSIKAIWANFAAQALMSVVF AFTLSLNGTDPDIQNAMATLFSTTWRIVLG  
SLTAYFIGDWLNSYLSMRMKVAQKGNFFLRAMASSLPAHFIDTALFNLIAFGGVWTS GD  
ILRNTLSESSLASVYEFVFP LTFIVVRYWKKLEKIDVIDEGIKYSLF\*

>SPSA8\_v1\_200003|ID:41145517| Chloride channel protein EriC [Spirochaetes Bin 1 SA-8]

MSSHESRTPANARKQRTRIEIYSLSLT GILAGLVVVA YRFAISAAEESRSSFLQLHRTS  
LPHLAAFFLLLAGAGAVTFLMTRARPLIKGSGIPQVKAFLLRVNFWDKREL PFKFSGGV  
LALGAGLSLGREGPSIQLGSLTGKAVEEIAHKPEYQRYLITAGAAAGISAAFNAPLA AVL  
FCVEELHRNISPVM L TSALIASFSANLIMWIFAGNTPIFGIELINVL PINLYVPAILAIG  
ISTGILGALFNHGLIRTGEWFKKLFHQHLPGMMLAFLVGG LVCILLPEITGGGNSLINQL  
NLNSFTFLTLIILLAAKFVFTLFSYASGAPGGIFL PMLALGALIGSIANRAFFVFNLPDG  
YLPNYLLLGMAGFFVAVVRAPITGAVLITEMAGSFSHFPAFIFVSVLASLTASILKTPPI

YDMLLAKIPASSQNKANIHSAAEEAEPVVLHIPLQEGCLYTDCAGLSAHLPAALLSGILR  
GENELFPEPGLIYAGDIALILVPRYRAHQKESLLELGKSAAVCPDSNEET\*

>SPSA8\_v1\_200004|ID:41145518| putative PAS/PAC sensor protein [Spirochaetes Bin 1 SA-8]  
MTQNGHNGIHKELKILIIDDNEDDAALMEHFLRKQWPEALVTVIDSREGFLDLLDSNFQF  
DLVISDWSLPQFSGMDALKMLRGSIDIQAPFILVSGKIGEEASVQAIREGAYDYVLKNNLT  
RLPIAANRALQDRAREQAEQKMQEQLHLQATGLQAIPIAIVIISASGIIESVNPFAFEVLT  
GYEPEEVIGHSVAEFCDSGLCMQDFQDWKGNHIKTSRVTEKRKNGSHYFEEWTICPVYND  
KDQLTHFIVAKTDVTSEEQRKRHNELELLYSNLQAQANSSSILIKRTINFIAEQFPASHP  
GFHIHATSHESAVDSWGTPHEKSLNEFTYEIHFFDQPFQQLAMNYSSTSVLNEFELYAV  
IAKAFESALLKLAAKERAESQIKKISFLSYITKSINSVFDADLMLGNILKQSAKLLNADT  
MALYLYNKETKDYVCRAHYGLRSINLTGVHIA PGQPYVGTAASDQQFLSCYTFDNLNGQD  
QFIALIQTEKFLSQHCAPIVVGGMTLGVLEVFQRKEFTLTDEWVALFEAIAMQTGVALEY  
NTVFLELQSVYRDLENSYEATIEGWSSAMDLRDQETEGHSKRVTSLTVAFATRLGFSQDD  
IVRAKRGALLHDIGKIGIPDSILRKNGLPTTEEWAIMKEHPSKAYGMLYRIPYLRNCLDI  
PLYHHEKWDGTGYPQGLSGKKIPLAARMFALIDVYDALTS DRPYRKAWTKEKTVEYIREQ  
AGRHFDPTELTEAFIALIKD\*

>SPSA8\_v1\_200005|ID:41145519| Response regulator receiver protein [Spirochaetes Bin 1 SA-8]  
VNGIGEFQTILLVEDNPDEELTLAFKNNHIANSIIVVHDGAEALDFLFRKAYANRDV  
RSTPRLVLLDLKLPKLSGLDVLIELRNEMTRFLPVVLTTSNQDEDIINSYKYGAN SFI  
RKPVEFSKFNEAIKSLGLYWLVLNEVPLSTKTALAKG\*

>SPSA8\_v1\_200006|ID:41145520| putative Histidine kinase [Spirochaetes Bin 1 SA-8]  
MVL SIIQNISIIIAAEVLYHFLSQSFGKAYLIAILNGILFGLTAVLAMMTPFRFETGII  
YDGR TIVIGIATLFGGPLTGSIASAIAAGYRIFIVGGTGYLAGVLSILEAFVIGAI FNRI  
RKHAKLAHEWPIIVAASMLIHVFMLLAQLFLPNQRWRLVLPVISPVVLTIIYPIGFILIST  
LFIEAEKKAQAHKELEASEERYRQIFNNRHTVMLIVDPQTGAIDANPAAEVYYGYSHEI  
LCRMKVADLNTLSPEEVRQEMARAKSFQKNAFQFRHRLASGEIRDVEVFSGPIIFSGKQY  
LYSIVHDISEKMEAKRKIVEMNENLEKIVSRRTAELESANLELESFAYSVSHDLRAPLRA  
IEGFFGFLMQEIAEINPSLSDNARHYQERIRFNITKMNLLIDDLLNLSRIGTQELSLQSV  
DMSELAKEVVNELQSENPGRAAIIIDPAMTCVADKALLKIALTNLFSNALKYTSTVIQP  
AIRFSSMDKDNERVYFIKDNIGIGFDMQYAGKLF TPFQKLHSDKRYPGTGIGLSIVRRVIS  
KHGGKIWA EAVPDKGATFYFTLGG\*

>SPSA8\_v1\_200007|ID:41145521| Methyltransferase-related protein [Spirochaetes Bin 1 SA-8]  
MDFQALIP LRCPLCAQETERLNFPIRGRDRWYHRCGSCGFMYLAPAHHLSAEAEKARYLQ  
HQNSNDNGYRDYLETFIKAAVLP HLKPGA EILDFGSGPVPALSNMLNERGFQCY PFDPYF  
SPDSAWQSR SYDAV MLHEVAEHLADPAAVFTAAGACIRNGGFFIIRTRFLESCAD FASWW  
YRMDSTHISFYTEIGMRKIMASQGFLPILFQIPDIAVFRKNTR\*

>SPSA8\_v1\_200008|ID:41145522| Biotin/lipoate A/B protein ligase [Spirochaetes Bin 1 SA-8]  
MAYEFRLK TGFHD AFFNMGLDEAILTAVAEGRVLP TIRFYGWEPHAISIGYFQGVYEEV  
NLEACREKGV DVVRRITGGGAVFHAAEVTYSIVIPESHPLSRPSILDSYRLLCSGII EGL  
SRLGIEAEFAPINDIIAGGKKISGNAQTRKKNCILQHGTILISVDVDTMFSLLKVPQEKA  
RGKLIQEVKARVTSIENLLGKAIGFDETALALEQGFSSALDLALSEAEPSEEETIAATGI  
SAEKFS SPAWTFKR\*

>SPSA8\_v1\_200009|ID:41145523| conserved protein of unknown function [Spirochaetes Bin 1 SA-8]  
MKISVIGKPEGCKLLRIFLEVTEPLNRESIIISLNIHGDFFAIPEERFEAVEMELAGTRL  
GNLAENFDA AIAASHHIQVEGICGRCLMEILRSVVHGI\*

>SPSA8\_v1\_200010|ID:41145524|lipA| putative lipoyl synthase [Spirochaetes Bin 1 SA-8]  
VIETGKKLPKPEWIRVRLPSGNEWQHVDAILSNYGLHTVCDEARCPNKGECWGC GTATFM  
ILGDTCTRGRFC AVKTAKTGLPVRQNEPEALAAAVKEMKLT YAVITSVDRDDL PDRGSG  
HFQRCIEAIKT MSPDVKVEVLIPDY YGEELRTVLAANPDVLAHNIETVPRLQSVRDARAS  
YEKSMRTLREAKRMGARLTKTSILLGMGETREELLATFQDLRKIDVDILVMGQYLQPTPQ  
ELPVFEYIQPEIFPELAKLAKAQGFKSVVSSPFARTSYHALEASESLQ\*

>SPSA8\_v1\_200011|ID:41145525| conserved protein of unknown function [Spirochaetes Bin 1 SA-8]  
MGLDDWQERKREEVYASVLRGLERRRQADPTFTIDDARSALEHLVLDGNDWLGRGELGD  
IISAATLAA YEYFIHEWMKEKEQA\*

>SPSA8\_v1\_200012|ID:41145526| conserved protein of unknown function [Spirochaetes Bin 1 SA-8]  
MSVEIRKVTTS AELKAFITFPERLYGDNPNWVPAPVFDDLNTLRKDKNP AFEFCEAEYWT  
AWKDGT MAGRIAGIINHRYIEKWGNKYARFGWIDFIEDFEV ASALVKTVEAWAREKGM DG  
VHGPLGFTDL DREGMLVEGFNEQATFATIYNFPYYPEFMERLGYKKDIDWIEFQVQTPEA  
IPEKVL RVNEILSKRSGVRIYEWKNK KELVAKFADDIFELIDEA YADLYGTTPLSRKQVE  
VYIKQYLGFV DPRFTKVLVDQNEKL VGFGITVPNLS DALYRCKGRLFPFGWFWLLRALKK  
PTKIDMLL VAVKKEYLARGVVA ILM TALNKSAIENG IKVSETNPELETNYQVHGLWKDYP  
KRQHKRRRVYLRL LLD\*

>SPSA8\_v1\_200013|ID:41145527| putative Peptidase, M22 family [Spirochaetes Bin 1 SA-8]  
MNILVFDTAAEKLEVA VSAAAENRFAFRSVSGFRHSETLLPTISSVLDEAKLAMNSIALI  
ACTQGPSFTGLRIGMATAKGLSMALGIPWVAVPTLDCLARPF GELAGPVVPVMDARKNR  
LYAAMYFHGRRQGDYLDISFQDLVEKLDSPDILFTGPDAELFREL AGERPGFVIDEGST  
EARMRGLVSLALDKLNTEGPEPDTSGPLYLREPEIG\*

>SPSA8\_v1\_200014|ID:41145528|tsaE| tRNA threonylcarbamoyladenosine biosynthesis protein TsaE [Spirochaetes Bin 1 SA-8]  
VRFILKLIRTTTPAQTMELGSIIGKNAPEGKVIAFSGDLGAGKTTMTKGIARGLGIQEEV  
TSPTYTIQSDYQGR LILHHIDAYRLSGADDFLETGIMELLGTPGSLSIIEWSERIAPLLT  
SGIALEDLARIRISVAEDGARTIELEGAWLEELFS\*

>SPSA8\_v1\_200015|ID:41145529| putative Hydrolase, alpha/beta fold family [Spirochaetes Bin 1 SA-8]  
MTESGLLFTASDGKNIA YQKVLPAGKPKGIILIGHGMNDYGSRFMHLALPLGEAGFAVFL  
PDLRGHGD TDKDANRGYLADENGFERVLEDIMELGD LAVKECGQIPLFYFGHSFGALLGM  
ALAGIYGKYFEGIVLSAPPQKPDPLDFAGGIVV SIGLKSKGPHAPAKLPRQMTFGAYAK  
TVPNPKTD CDWISRDQDVVDAYVADPKCNFICSYSFYQDLMHGVRKVYSDGFFNSIPTSL  
PVLLFAGSNDPVVGM RAGFQKIEKLFKSLGLTDFESKCYEGNRHESINELNKDEVIADVC  
DWFTRHIA\*

>SPSA8\_v1\_200016|ID:41145530| Poly(A) polymerase [Spirochaetes Bin 1 SA-8]  
VFIRYHRDKNGKLVQQA VVYTEKEHGIARDAIDADA IKVIERLKEAGFKAFIVGGAVRDL  
LRGKNPKDFDLVTD AIPARIKKIFRNSRIIGRRFRLVHIYFGDKIFEVSTFRSIVNGSVG  
NEFGTIDEDVLR RDFTINALYFDPIENIIVDYVGGFEDVREGILKPIIPLGDIFAEDPVR  
MVRGIKYAIAANCVIPP NVQKQIRKDSQMLAGVSASRMTEEFFKILASGKSAEIIQSLCN  
FRLF EYFVPHIWARMEASPEYREALLADLAALDAQNVSLARTLLQDESAEALNQEKKSVS  
VLLSYLLKRYVSEKLASL KSDGTGELPPSEVFRASLLDARAFVMPMNPPRVELEAAMMMI  
FKNLGISPLRKPERKRRS WKPVSKQGERLLADKEQR\*

>SPSA8\_v1\_200017|ID:41145531| conserved protein of unknown function [Spirochaetes Bin 1 SA-8]  
VNPEKLSLLADEELILLADRMGIFIPEGLDRRFIIEEIT ALDDDDHERVFSHDGTGHVE  
EKKFSGSRSLPA VGFEKSGFPERYNETMIRALPRDPAWIYTYWDLSEQKRESLSGD DENF  
ELFLRVVELQPESGHKKDFFDISISHDDWKWYINIPSPGETYRIDLCVRKNGAAKVLARS  
NEVRMPIFFVRHAQRIPKMTKSLLLSGIEDLHLFEQKEENPSRILFDNGE\*

>SPSA8\_v1\_200018|ID:41145532| conserved protein of unknown function [Spirochaetes Bin 1 SA-8]  
VHNQRPM LALVLNAHLPFVRKPEFPEFFEERWLFEALSETYLP LLRLFKKLES DSIPFKL  
SLAISPTLLSMLS DKLADR FVKYLQKQIELGEREKERLAGDPVFAPLAALYHSLYLRNL  
ADFETLYGREILPAFDY YKKGKIEILTSGATHAFLPLYQDVPEALLAQIETAIVAHRSI  
FGKNPQGFWLPQLGWYPALGKILREYNIKYTIVTTRGALLGNPTPLFGSFSPTTSDGLN  
VFIRDAGATKAVWSETEGY PADPVYRDFYRDIGYDL DSSFVKPYLGDSVEHGFTGFKYWA  
ITGR TDQKRPEPGAAA AKVLEHAHAFLEERKTTARAAGFLMKDRKPLIVCPYDAELFGH  
WWFEGPLFLEALFR TAARKHGPEEELFVTLAEYLRHNPENPHSDPEFSSWGEGGYAEVWL  
DGSNDWVHRHSHKILERMV ELAERFPNESGLRERILNQGAREALLAMTSDWPLLLRSGKS  
SGFAQQQIVEAVKNFYRIYEMLCANTVDTEWLT TLEKRDNLFPAINYRIFAPKR\*

>SPSA8\_v1\_200019|ID:41145533|purA| Adenylosuccinate synthetase [Spirochaetes Bin 1 SA-8]  
MNVVVIIGA QWGDEGKGIKIVDYLRADAGIVVRFSGGANAGHTIVLSGTYALHLVPSGILY  
SDKIVILGSGMVIDPEALFTELDGLKAKGIDWEGRVLISDRAHLVLP RYKDV DREMESNR  
KKPIGTTGRGIGVAYAFKASRDGIRIADIDDEDRLQNLSEEDKAFINKWRDKL KPMATDL  
AA YISRHRNSWTLFEGA QGALLDIDTGTYPFVSSGMSCAAGAAA QGGIGPRRIDRILGVF  
KAYTTRVGNPFPTEFKDDSPDLSNYIRTTGNEYGVTTGRPRRCGYLDLVALRYACMVN

SIDRLVLTHLDVYDALAEFEACVA YRIDGKVVEDFPASIRDLERAVPVLKKFDGWKMPIS  
ACQSWEELPTKAREYVEFIETFTETPISIVSVGSDRQQTIVRESPWTRF\*

>SPSA8\_v1\_200020|ID:41145534|guaA| GMP synthase [glutamine-hydrolyzing] [Spirochaetes Bin 1 SA-8]  
VDKILILDFGSQYTLIGRRVRELGVYSEIIPGDSPLNETHLKDCTGIILSGSPFSA YEP  
DSPIIHSSVYDCGLPILGVCYGIQRMTLDARGRVAKLEEREYGKKAVAVRTGIDDPLLKG  
IPASFISWMSHGDSIVSPGEGWEVIGDSDGNIPAILRHEKLARWGVQFHPEVSHCEFGTV  
LLSNFVFGICKTKAGWSMQAYLDQEA EKIRTTIQDRPALLLISGGVDSTVAGAFLLRVLG  
PEQVYLLYIDTGLMRKAESEEV MANLARLGAKHLYKADAEARFLTALAGVADPEKKRRII  
GDMFITVQEEEVQRLALKDAFLVQGTLYTDLIESGKGVGKKAQVIKSHHNVRSP LVEEKR  
RKGLVIEPLDRLYKDEVRALGRLLGLPESVVG RHPFPGPLGVRILGAVDREKCDILRNA  
DAVFIEKLRELGLYDKIWQAFVLLPVRSVGVAGDERKYGYVAALRAVTS EDGMTAQVYP  
FDAADLIAISSAITNRVPEIGRVVYDVSSKPPATIEWE\*

>SPSA8\_v1\_200021|ID:41145535| putative L-lysine 2,3-aminomutase [Spirochaetes Bin 1 SA-8]  
MQKPWQHDMRQRITELPDHEHSALIAELIQKNALPFAATAYWLSLADEYRT CERDARGV  
PRDPILAQALPSPEELEISALESLDPLNETRHSPYPRIVHQYPSRVLLRRTTGECALFCRH  
CFRRSLLPQERGFISEAEHRLIDYLKAHQEVREVLISGGDPLTASDARLAKLFSGIREA  
GANILIRLCTRMPVTLPSRV TREFVGM LKRFKPLQVVLHINHPRELSDFVEKARLFIET  
GLPVHSQTVLLRGINDNLETLVSLFSRLTRIGIDPY YLFQGD LAAGTRHFRVPLSKGLAL  
YAELRKQLSGLELPRYAVDAPDGAGKLYLPESVVGREGDFWILRAPDGLSHQYPEETD\*

>SPSA8\_v1\_200022|ID:41145536| Phospholipase, patatin family [Spirochaetes Bin 1 SA-8]  
MAAYRNLVFKGGGVRGIA YLGALQFLYEKGLMRSIERVAGTSAGAITATV VAMNFS SFRE  
IHEISDSLEYRKVPSEGTQTEEHVRFLKANPLAIRNQFRAVFKNVQC SMRFIQDRGWYSS  
DYFYTWLKDVIARQFTVKKESYTFSDFRNASIHAGGREFLDLYITGTDISNRMSRVFSYE  
TTPDMEVALAVRISMSIPLYFESIQQYPGTSEPQSYVDGGIMWNYPI SLFDDQRYGRKI  
VNGVNTETLGMFIFTSPNETRYKKVDSLVDYLGALFESLLVQEHLVAASERNKGR TIFI  
DDKGVPI TFFD VDTGDETYRKLFD SGYESAREFFENRTNWD MFFHGIQQKLGWIR\*

>SPSA8\_v1\_200023|ID:41145537|argR| Arginine repressor [Spirochaetes Bin 1 SA-8]  
MKERLERLKVIRNLIKTHRIDSQDTLLQLLVEEGYTVTQATLSRDLKYLKVGKVADGHSG  
YYYTIPSD EERKESERHLVQDFLRGYVSVDWNE SLVVVRTFSGHSDSVALAIDNMGLDEV  
LGTISGRDNVVFIALKQGVKGEDFIRALKEKIPDFDPE\*

>SPSA8\_v1\_200024|ID:41145538| conserved protein of unknown function [Spirochaetes Bin 1 SA-8]  
MEDFKAVILHGFSNEEALTIMRAVKSLGISASQTAFATTTPTSLQWKVEYLLEHLHEEHA  
MMQTRLAEQKKAGH\*

>SPSA8\_v1\_200025|ID:41145539|clpB| protein disaggregation chaperone [Spirochaetes Bin 1 SA-8]  
MNYEKFTLKAQEA VRDAASLAQNHDNPSVEPEHILLALLDQEEGVIPSLCERIGVDIASL  
SSELGARVEKLPKAYGSASQVYLS PAASKAIAKAEAEAAAIKDEFVAAEHL LLGILAVEC  
PAAELLKQLGITKDRILATLKSIRGNRRVTDQEAEEKYRVLERFTRDLTALARAGKLDPV  
IGRDEEIRRMQVLSRRTKNNPV LIGEPGVGKTAIVEGLARRIMEGDVPDSIRDKT V LAL  
DLGALVAGSKFRGEFEERLKA VIEEIQKSDGKIILFIDELHTLVGAGAAEGAMDASNLLK  
PALARGELRAIGATTLDEYRKHIEKDAALERRFQPVYCAPPSVEATIAILRGLKERYEVH  
HGVRIRDDAIIAAAVLS DRYITSRFLPDKAIDL VDEAASRLKMEIESQPTDL DVLERKLI  
QLKMEAQALEREADAASAERLAKMRKEIADLTAQRDSMKMKWEAEKQKISEIRNLKQQIE  
ELKLEADRKLREGDLAKASEIKYGR LVEAQKKLEALTSELKSRAEGQTLLREEVSEDDIA  
RVVSNWTGIPVSKMLSSELQKYVELEQKLAMRVIGQEEALRAVSDAIRRN RAGLSDPKRP  
LGSFLFLGPTGVGKTELAKALAEFLFNDEKSLTRIDMSEYMEKHSVSR LIGAPPGYVGYD  
EGGQLTEAVRRRPYSVVL FDEIEKAHPEVFNVLLQTLDDGRLTDGQGRVVD FRNTIIMT  
SNLGSDLILEAKGREEIRQ GIDALLKTA FKPEFLNRIDEIVIFDRLDAPMIRRIADLRLA  
ELAD RMSQRSIMLNIDDEARDFIANEGYDPLYGARPLKRAIQALLENPLARKVLSGDIRE  
GDTVQVAKTQDGLDFIVIRTA EGRNA\*

>SPSA8\_v1\_200026|ID:41145540| protein of unknown function [Spirochaetes Bin 1 SA-8]  
LNRLEADLLYTDTHAHL SLCEQRIGRQKLFSLLE YDQLWQGSADTPKPFIVDVGT VAGD  
LASRLGVFGRYA WLKFSAGIWP SQTALEHPDES LFR LKDDCGSGRVA AVGECGLDYFHMA  
GSRNAQIRLFEQQIELAXX

>SPSA8\_v1\_210001|ID:41145541| protein of unknown function [Spirochaetes Bin 1 SA-8]



MERISLRPDSDRSKGQNCADCHQWTHRRRNPDLGASLRGRHPHAGSRIYLYAWNAEIPDP  
RHNRRRGKRLIKHKVAMKVPTMTVETKAGFRLLFDDRAVLVHMPDSPFIYAGKGSQSIT  
MNCGNFSIEDEIEELLPLIDWNLEESGPGFAKVRFSAFSRYSLDAQFTINDGRLVVNLKS  
GDTQESGNQQANRYRIVLPADSEYIYGCGEQFSYFDLRGRKFPLWTSEQGVGRNKKTRI  
TLEADLQGNAGGDYWWTFPPQPSFVSSAGYWCHADTSAYAVFDFSKPDRHSLYFWDLPQK  
LLLSRQFNKENMAGLLX

>SPSA8\_v1\_210002|ID:41145542| Carbohydrate ABC transporter membrane protein 2, CUT1 family [Spirochaetes Bin 1 SA-8]

MKKRTRTILTSTIIAIVAFVLIIELYPIGITVVNGFRDIIILSGQPFKLSQLTTRSYE  
LVLKNPGFQLGMKNSIIIGLLSTGISVLIGAMASYGIARFRFGWRNSLAYSFVFRMLPQ  
ISLVIALYLMFTNLGIRDTVGGITLAHTSFNVPYVIWLLLPFFTAVDKAYEEAAMVDGCS  
RMGVFFQIFLPIVAPGLVVAAVFAFLNSWNEFLYALILTGVKAKTAPIAINGLIGGETLT  
WGQVCAAGTLMMLVPVFIITLGMQKFLIRGITAGGVKG\*

>SPSA8\_v1\_210003|ID:41145543| Carbohydrate ABC transporter membrane protein 1, CUT1 family [Spirochaetes Bin 1 SA-8]

MSSKKLVTDSPARNKEGKAREHAPFLFLLPALLVVFAVLIFPIIFSLIVSTFNWPLSEG  
AGVRRFVGLGNYIGLTQDPEFWNSLKLQLGFIPIAIPLELLLGFAAALLNREFFGARLV  
RSLLLLVPVFFLPILSGMTWRFMLQPRYGPLNSLLSLGAPEITWLGPNVAAIYAIIVQDI  
WRMWPFMFMLLYAGLTAIPQEMIEAAEIDGAGFWKKLRSVIPLLTPTILTAILLRIIDA  
LRVFSEVYVMTEGGPGTSTMLFSLYTHRQAFGYQKVGMAAIFLLILSIVFALTIVRK  
NMSLDALEEKAGG\*

>SPSA8\_v1\_210004|ID:41145544| Carbohydrate ABC transporter substrate-binding protein, CUT1 family [Spirochaetes Bin 1 SA-8]

MKKALFILLAVAMVGMVSAQTINVLFWDDAYPRTLMEIPEFEKATGIKVNFEILQPPQ  
VFTKTSVAVGKDKTDYDLVCVDEGNIPLFASLMLPYDQWGPVKIFKKVDPSTVTPAMLDV  
AQWDGKLIPLINGNLYVWMTRKDLIENPKYKAEFKAQYGYDLGVPQTLQQLDMGTYFY  
KNGIVSGGFGPFNGGPAGVFGEAIFMWESFGTHFIEYVNGKPKLVVDKAKAVQGMEFYKK  
LMAISPKGAETMAHVERQA AFCADPKGVFTQFIWPAQIASYEDPKSLAAGKIVYSAPPS  
GPAGRFAVRGTWAVNIPLASKNKDAAA EFWYWWASKDIATWLVEKNTVPARTDALTNPKF  
AASKPWLA AIADSMKYAAARPRFNEVAQVQDIVKKYWIMGITGQMPTADAMQKIMDETQD  
VLKKAGY\*

>SPSA8\_v1\_210005|ID:41145545| putative Sugar phosphatase YidA [Spirochaetes Bin 1 SA-8]

MEKNSIKYIALDMDGTILDKDYTISPAVIDALQRQKLSGRKILLATGRVRASALKHAHKF  
GGADGYICSNGADVYGADGRRIAQRHIEEPVSRLVELARQTTSHFHAFIEDDWWYEEEK  
PYTEFYHRRSGLEGRPTNFDYFSALTFTKFMFLDDHEKLEPIKTKIELDFPSSLQAMYSA  
PFMLEVVARGVDKAAGLKAFLDFAGASLSEVCAFGDAENDLMLKAAGIGVAMGNAPEPV  
RQAVRYHALSVDDDGVAVFLNTFLS\*

>SPSA8\_v1\_210006|ID:41145546| Fumarate lyase [Spirochaetes Bin 1 SA-8]

MSKKRFSEIYWRNVLDPSYQNWRLRFKTASFQVHRAHLLMLFRQGVVSRDIVDSIKKALD  
KLERTFEFPAVLPNGVEDLYFILEQALGEEVGQENAAWLHTARSNDMDTTIFRMVLKNE  
FRNLIQKLTA VCRAMELKAQHSEGLLTVLYTHGQPANPSTFAHYVMAIAQELADTAGYCL  
DALDDIDKSTMGAAAITGSGFPIDRAMVAQFLGFSAYAVNTYQAISTGHWLERPAQAVQL  
LMVDIGRCIADILHKASCEVGLIIFPDDL VQVSSIMPQKRNPVILEHVRIQASSIIDSCS  
AMLQHFRNVFPQDVNENADAPIAQFLDTLRKSVALLDLFEEAVLKMEDPTERAREISRQF  
GVTTELADDMVRRTGVGFRVAHELCSIFVSSGSSFDVLRKEFNKKTGNTLPYDDDELRR  
ILEPETFIRVRSVPGGPAQDGMKENYIELEKKVFALQRSVAESLERESAGIKSMMDGLSE  
I\*

>SPSA8\_v1\_210007|ID:41145547| Amidohydrolase 2 [Spirochaetes Bin 1 SA-8]

MRVIDSHVHFPEDKIIDDGLEHDEKASSDGIYSSGNTEKSAEALKPHQAWLRAEKNRWE  
SAWRFPPEPVAVSKEHGEALWLSEFEKYPYLEKVVFVVTAGSNQFASSELSESNPGRFIGYAH  
HNPMLKDAPDRLEKAVKVQKLRGYKLLGPKVEKPLSDPFFDPLWETAQDLQIPVLIHFGI  
MGAAGGIASHINMNPMAIHDAAKRFPDIPFIHPHFGTYLFEVLNLCWACPNVYIDTSGS  
NQWMRWMPYEVSLEILFRKFRETIGPSRLIFGTDSWFPGRGFSEKYLDEQNRAMS YVGFS  
DDEKDMVLYRNIAALLKIQGN\*

>SPSA8\_v1\_210008|ID:41145548| Binding-protein-dependent transport systems inner membrane component [Spirochaetes Bin 1 SA-8]

LNRSIMKTGGHKKISINILFSYFFLTLFSIVMIFPFIWMILSSLKDVSQIFTLKLFPSKP  
TLDNYRYILFSGSTKFPQWFLNSLIVAACITVSVLFFDSSLGYTLAKFRFPGKKIVFLLI  
ISTLMIPTEMLVIPWYAMSRALKWGNTYWGIMFPGMISAFGVFLMRQFMSTIPDDLIDAA  
RVDGQOGELRIFLTVILPLVTPALATLAIFFNFIGNWN AFLWPLIVSSRPRMFTLPVGLANF  
SGEAGSDWHYIMTGA AVAMAPLVVVFLLFQKQIVRGIAMTGLKG\*

>SPSA8\_v1\_210009|ID:41145549| Binding-protein-dependent transport systems inner membrane component [Spirochaetes Bin 1 SA-8]

MTLAGKRALTAYTFLFIPLIFFICVRFGPMLYMLVMSFTDWGLLRKTVKFVGFNGYRAIF  
SDPVFLKSLNNTFVYAFGGAPIVHISLGLALLNLIPKGGKGFRLIYVLPYITPVVAVS  
WVWRWMYQPPPLGLINGILGALRLPAGDFLNSIHQSLPSILAVNVWVELGYCTTIFLAGL  
QTIPHELSEAARIDGANDRQVLTRITLPLLLPITMFLTIMEGIQFLRIFTQVYNMSMQAM  
GGPLNSTKSAALYIYQKAFTNFEMAQAASASLVFAIIMTITLIQLKFFDRRINY\*

>SPSA8\_v1\_210010|ID:41145550| Extracellular solute-binding protein family 1 [Spirochaetes Bin 1 SA-8]

MKKKTLMIMVLLAIAVAGTFAQTVTITYWQYFYESKVKLMDELIQKFAANPGIKVEQVT  
FPYESYNQKVAASIPAGEGPDVINLFYGWLP MYVKAGYLQELPATDFNKAFPEKNFYPFV  
AESVDFGGKYYSVPTAVRTLALIWNKKLFKEAGLDPNVPPKTLEEELEAFARKLSKYDGGQ  
NLIQAGLAMQPTGQGHNLREVLFRRQFGNTPYSSDYRKV TYADANGVA AFK WYMDRIVKD  
KVGYPNFATDDVTAFKAGKAAMNIDGSFRIATLNAVKDLEWGVSELPSYKGIKS NYASF  
THAIVAGTSGKKLEASIKFLKYITSPEVQVLWLQRV GELPATPLLSSEYKNDPVIAPFLK  
GLAYAHASQFVDEAGQRTVLVDAVDEVYLKKVDP AVALKNAADKEQALINSFWAK\*

>SPSA8\_v1\_210011|ID:41145551| Cyclic nucleotide-binding protein [Spirochaetes Bin 1 SA-8]

MVDTSQLQKYSFLGGVLP EQIEKIKTLFGYEQFNTGETPMKEGAPNDKIYFIISGRVKVS  
KKGPIAELKEGETFGEMELIDVMP SIATITALEPLEVVTISNRALYEISKLDPKAFSMM  
VMNLARDVSRRLRRMDELACK\*

>SPSA8\_v1\_210012|ID:41145552| GGDEF domain protein [Spirochaetes Bin 1 SA-8]

MIRLSKSVFNDLAI FMMGFGLV GIVFPFLILLGVPASITLQPWFIFVCIMAGLVVGLV  
NIILARSVVGARLQKLVKRMQYISNHLINDSHEDIVSNCKTSDCLLEVDSSDVLGESAKS  
YNVLVNSLFASLKSELMVRQFTSMLSTRLELEDLGVTVLPALLSFTGTEAGTIVMERDGE  
MEVIASYRIRDNAGVVKSDVVTRAI VSKQRQLLQMPADIAIESSVLDFSPRTVLVEPLVY  
HDVALGVIVLASVSAISQETLAML ELVNASLAVAFRNALTYDQLQKLAANDSLTGMFNRR  
FGMARLQEEFGRSIRSGSPVGV CIFDLDFHKNVNDTYGHPMGDKVLVHVSRL LKSALREG  
DVALRYGGEEFMAVLP GASLTDAFQIADRVRRLVEETVFQHGSQNLKLTLSGGAASWPDF  
DASSDALVRRADEALYQAKEGGRNRIVAL\*

>SPSA8\_v1\_210013|ID:41145553|ams| Amylosucrase [Spirochaetes Bin 1 SA-8]

MEGFKQSLYRRLERRSITKSVWHEFFIRLENELDRLV SLLYEL YGERPDFAFWVEDIVI  
HAFESFRTRPAWLKERDRQFPPE SGWFRSEKQMGAVCYVDRWAGNFQGLRSRIPYLEELG  
ITYLHLMPPFFKSPEKENDGGYAVSSYRETNPALGTMKELALLAQT FSEHGIALVADFVFN  
HTSDEHAWALQAKKGESWYRN FYLTFSDRSEPDEYEKTLREIFPESRRGSFTFNEEMQRW  
VWTTFHSYQWDLN YRNPAVFDAMCCEMLSLANHGISILRLDAVAFIWKQKGTSCENLPQA  
HTLIKAFQSMARLACPSLLFKSEAI VHPDDIAK YIDLRECQLSYNPLLMAELWEAAATKE  
VRLLSHSLEKRHKIPAGCAWVNYVRCHDDIGWTF ADEDAWALGINPFDHRQFLNRFYLG  
FPGSFAKGLSFQYNPITQDRRICGSAASLAGVDRADAVRDPEKLERGMARLILLYGIALA  
AGGIPLLYLGDELATENDPAWDKDP AHKADSRWVHRPLWNETLANERHDSSTVTGKVFST  
IKSLIAQRAAHPVFAASDLAVRPSGHKSIIVIHKEVPGSQLVIVGNFSESSVPISQTRLT  
EILGGEPYTDLV TDSIWNARSAEALAPCQLLW LFR\*

>SPSA8\_v1\_210014|ID:41145554|yufQ| Uncharacterized ABC transporter permease protein YufQ [Spirochaetes Bin 1 SA-8]

MKATLILEMFPIALMFASPIIMAALGGLFSERSGIVNIALEGIMMVGGFAAASVTVLLES  
STPLAPWIGLLVGIAAGMLMSLLHAFASINL KANQVISGTALNILAGGV TIYLSQIIFHQ  
QRTRSFSNGIQKMTVPGLSRIPLLGKMFFIENYPTFYIAIALVLITWFLVYKTPFGLRMR  
SCGEHPQAAASMGINVAGMRYIGVLASGALAGLAGGVMVLTADIQYTVMSIHGTGFIALA  
SLVFGRWNPFGVLAAGLFFGFSTALS FYAKDITFLAKLPSEFFYMLPYIFTIVALIFFAG

KSVGPKAAGEIYDSGKR\*

>SPSA8\_v1\_210015|ID:41145555|yufP| Uncharacterized ABC transporter permease protein YufP [Spirochaetes Bin 1 SA-8]

MTKRTEKVLLPLIAVFLGFLLSIIVISTGRSPVAMFSAMIRAVSGIDL VNGMSFNPRYI  
GEFIIQSMPIILTGLAFASFRTGLFSIGAEGQLMVGSLAATAVSLLVVAPAAVHVPLVL  
LAALLAGALWGGIPGVLKARFNVHEVVVTIMMNYIAFHLNNFTILNVFGSVDRVKTAFPP  
QSALLKDPMLSLTNGSRLNWGFVPVILALLAFSFIINKTTFGYSLRAVGYNKEAARYAG  
MKVNRNIIILSMMIAGAFAGLAGAVITNGTFNFRALPAAEGYGFDDGIAVALVGANEASGI  
LFAGLLFGMLKAAQPLMQSQGIPKEIVGIIQASIVLFVAMQYGIKLILEKLARKKNAPAE  
GGQE\*

>SPSA8\_v1\_210016|ID:41145556|yufO| Uncharacterized ABC transporter ATP-binding protein YufO [Spirochaetes Bin 1 SA-8]

VAYIIEMLNITKDFPGIRANDNITLQVEEHSIHALLGENGAGKSTLMSILFGLYQPDAGK  
IRIKGKDV RVTPDNVATRLGIGMVHQHFVHNFTVTENILGMEPRKGPVIDIRAAEEK  
VAAISKLYGLAVDPRAKIEDISVGMQQRVEILKMLYRDAEMLIFDEPTAVLTPQEIHLM  
HIMRRLVEEGKTILLITHKLKEIKEVADICTVLRRGKVVGTQVADASEEQMAEMMVGRE  
VSFHVAKGPAQPKEVMLRIENLNVKNNKGVLGKNSLEVRKGEVLGLCGIDGNGQTEL  
QALTGLTRVESGKIYVGDITDALSIAKARTDLGLGHIPEDRQKHGLVLDFTLSENFVIHN  
YYEKPYAHWGILNPKAIRENADRLIREFDVRSQGGDTPARSMSSGNQKKAIVAREIDRS  
PKVLVVAQPTRGLDVGAIEYIHRQIIAERDNDKAILMVSLELDEILDVSDRIA VIFNGEI  
VGIVNAKETDENELGLMMAGSLRKNVPPARQSEPSASVQGRNA\*

>SPSA8\_v1\_210017|ID:41145557|tmpC| Membrane lipoprotein TmpC [Spirochaetes Bin 1 SA-8]

MKKA VLVLLVAALVAAPVFAQFKVGLVTDVGGIDDKSNQGTWEGIVRFAQDYKLPKANY  
KYLQSSAEADYVNLTTFADEKLNLI VAPGFLFNMAEVALKNPTQKFLIIDSVVQDAK  
GKNIPNVANAVFAEHEGSFLVGVAAGLKAKADGKNVVGFLGGMQFPLIEKFQAGFEQGVK  
AVFPECKILVDYAGDFAAPDKGQAI AQKQFNAGAYIIFHAAGGTGNGMIKEAKERSQKGD  
IRWGIGVDKDQYADGLYGNKSAVLTSMMKRVDVAAYDVCKMTMEGKFPGGQVLTFTLANK  
GVGIPEKNPNLSADIVAKVREYEALIASGKLVSEVPGK\*

>SPSA8\_v1\_210018|ID:41145558|deoC| Deoxyribose-phosphate aldolase [Spirochaetes Bin 1 SA-8]

MEKKWTKADIAAAIDHTLLKATGTESQIRELCAEAKKYRFASVCVNP SWVPLCSQELQGS  
GVMVCTVIGFPLGANASEIKAAEARLAVGQGAHEVDMVINIGKAKAGDWSAVESDIRAVV  
EAAGNATVKVVIETCYLTNEEKVKACQAAMKAGAHFVKTSTGFGTGGATAEDIALMRKT  
GSTMKVKASGGIRTLQDALAMLKAGADRIGASAGVSIVSEIEG\*

>SPSA8\_v1\_210019|ID:41145559| conserved protein of unknown function [Spirochaetes Bin 1 SA-8]

MNPEGRPGPQEIKDQYSGVPQSSLPLRSEAGFMDAESMIRLKNMHLAPYIQLATALIGMR  
RRNGGNMFRHQIDTMGILMDYGYIDSILLKASVIHDLIEDVPGISGDSILAIDEESA EYV  
KLVLEVTKRPIENKLDFLARIRDYGS LRAKVLKSADRISNMISLGYVTDIKFVQRYTEET  
ENHVFP IARLADERMLHELEELVATRKEFLARRFEI\*

>SPSA8\_v1\_210020|ID:41145560|valS| Valine--tRNA ligase [Spirochaetes Bin 1 SA-8]

MKAIELAKAYDPASFEDAIYAMWKSEGHFMPKAEKGGKPPFTIVIPPNVTGVLHMGHALN  
NSLQDIQIRFRMTGRPTLWVPGTDHAGIATQNVVERKLRKEGKDRRQMGREAFIEETWK  
VAKEHRAFIDNQLAKIGASVDWSRERFTLDEGLSKAVREVFVTLYERGLIYKGEYLVNWC  
PSCGTALS DDEVEHEDEAGSMWHIWEYELADGPCPECPKGKIEIATTRPETLLGDTAVAAH  
PDDERYKQLIGKMLKPLTDKTIPIADAYVDREFGTGLVKITPAHDPNDFEVGNRHNL  
RVNINLNPDGTLADTVPEKYRGLKVLEARKLVLADLETSGLLKSEVKLTHAVGH CYRCHTS  
IEPYLSEQWFVKMKPLAEKALKAWQDGEV VFFPRKWEHTYKHWLENIRDWCISRQLWWGH  
RVPVIFYCRHCGAVLVEREDPTYCKKCGSSDIYQDEDVLDTWFSWLWPFSTLGPWRETAD  
LRKFYPTSALVTA YDIIFFWVARMIMAGMEFTNQSPFQEVYIHGLIRDKQGRKMSKSLGN  
GIDPLEIVKENGADALKFTLAYNCAGGQDILLDRDSFKMGSKFANKVWNASRYILMNLEG  
REMLDLNSIQLN DTERWIAGR FQEA VQRVSQALESWRFNDAAQAVYSYFWDDFCDWYIEA  
TKLSTKFGDDKEKDRATTVLLGMLEKSLRLLHPFLPFVTEEIYRMLPNAKGRLISQPWPL  
DKESARDGQLDASFESLRQLVSMIRTLRSEFQIAPEARIPVDIRLDADSATSDFIRNAS  
LIALLVNSPEPAFLAPADARPEKTVALAGKGFEV FVHVRDLIDLKLLATLRKDLEKERG  
FASKVEAKLSNQAFISGAPEEIVAKEKEKLVSEIRMRKLSRYLEELA\*

>SPSA8\_v1\_210021|ID:41145561| Long-chain-fatty-acid--CoA ligase [Spirochaetes Bin 1 SA-8]  
MSDTPWAFLDGFRGSFFKGEWPTLPELFRISAQRFPERPCFTVYNPDRQSLNYTQALRK  
IEEIAWYLKAKGIQKGRVAVSGKNSPEWAIALYLGILEAGAVVVPIDYQLSSEEIAHLVS  
ASEARILFIDEKHTLEALCTGLEETIALYESHPSYL YRIAASA WGKKNEKSEADSDKA  
EEEDLAAILYTS GTTGNPKGVMLTHRNLVSDCFLAQANLHIYYTDV FYALLPIHHSYTML  
AVFIESFSVGAETVFGKKMVVKQILKDLKEAHVTMFLGVPLL FNKLLNGILKGIREKGIA  
VYGLISAMMWLSGFIKKVFKVNP GKKLFH SVLDKASLASIRICISGGG PLAPSVFRKYNQ  
LGIDFVQGYGLTETSPIITLNPVEHYKETS VGKILPGMEMKILSPNADGIGEIAVKGPMV  
MKGYYKMPEETA EVFTP DGWFKTGD LGYIDEENYVYLTGRAKNLIVTEGGKNVYPEEIEY  
RFQLFDQIDQVLVRGYIENXDSKSEKIEALLYPS PDWVAKLTEEAGSQAKAWEQAELK LK  
SFVDEVNLKLLPYQKITRVIILREPMEMTTTKKVKRFTSKIES\*

>SPSA8\_v1\_210022|ID:41145562| Anaerobic glycerol-3-phosphate dehydrogenase subunit A (fragment) [Spirochaetes Bin 1 SA-8]  
MEALYDNLNAAPLPLPACSMKKNHHCIVCIIGGGGTGGALAYDLALRGFAVTLLEKGELTS  
GTTGRHHGQLHCGARYAYGDRNIARECFEESVILSRIAGSCIEYNGGFFVALTDEEADFE  
KAFIEGCLSGIPARKVKKEKILAI E PRLGAVETGVFVPDGTDFDAFRLPMMFFSAAKMLG  
ARIMPWHEVVGFDITNGRMQAVIAQNLLTRESGASVSGKELRIEADYVINASGAWAGKIG  
ELAGADIPVTPAPGAMLAVKGR LVDRVISRX

>SPSA8\_v1\_220001|ID:41145563|ispF| 2-C-methyl-D-erythritol 2,4-cyclodiphosphate synthase [Spirochaetes Bin 1 SA-8]  
VHYIPGERDNKKITFKEDIPAMSSSTCEKLRIGEGWDIHPLVPGRPLLGGVRIENPLGE  
DGHSDADVLWHAIDA VLG AAGLDIGTHFPSPDRTWK DADSS ELAKMAAKLVKEAGFAI  
QNIDTTV VLES PRLGPHKEAIRTKIASVLEIPVDCVSVKAKTAEKFGAVGAGIAIEARAI  
ALLASKRN\*

>SPSA8\_v1\_220002|ID:41145564| protein of unknown function [Spirochaetes Bin 1 SA-8]  
VFLFEQWQDGFVLTVEGRRILHHRKRHPALFVLKPRDTRTGADNPETPLSWKALRSFSIV  
NENSESRLLRFD E TILIRFFYANKVLR CQFRVLDPAVKGLRLVLDAESEEMLFGLGGYCL  
EAQAQGNL KGLKIKTECAQSASLPDEPVV FSSRNWWIQTERKACPEFDFQLDKTIVTMSP  
VPDELLAGFGAKPASALVLLTSHK LKKWDDGVIPVKKRFP L PGWVFEGAIMQQAACLNPE  
MMKPLRTAAVVT DQADEAGAVRAVNQA AWNHLLTVSAVRVLEAQSFLGKKADMMVRLLLA  
NSFSGVGYQSLTIALPPVSNFAGQDSVVPFLARILDMAVFSPLLTVNLGGVGEHVEQGSP  
VQHFLKNLMRASELHAKLAEYHEYCSYLWQSKGLPVFCHPAIFYPEEKVLWNFD DAYLYG  
SDVLIAPSLPNDGRTRQLYLPDDEWVHLWTSRNFSGGVAVVDAPLGRPAVFYRKNSAFAA  
LFDEVRKIAVRLS\*

>SPSA8\_v1\_220003|ID:41145565| L-fucose isomerase [Spirochaetes Bin 1 SA-8]  
MKQHIRLGAVCLSR TTFDFKAAKELWADIRSQLAALPNVTLTAPENLVFEVDEAKAAASE  
LARA EVDGVMISGTFHLGHLALEIAKSVKAPILLWGLPELPYNGGKIRLNSVCGVNLNA  
SNLYKAGIRNFRAVVRPDVDTDWVDALRVLAVLKN SHIGIIGYRAHGFFNLSFADLSLYR  
ETGILLDHYELSDMWNFPITDEEAAERKKDYLVKVFDCSGISEAQLDKVARLAVKMKKFLD  
KNKLDALAIRCWPEFAAEYGISPCAAMSL LQSEDRILACEGDVEGAVSMLMHRAVGAETP  
FLDFDSQVDFEKNHALFWHCGVAPCNLWDGKCN RSLD TYFAGGKGVTADFVLKSGEVSVL  
RLDSADGKYRVFIQKATAVPM EKELKGTYLKAVFDSPVQEV LAKVVNNGIAH HASV VYGT  
YLEPFRIA AKIAGWEVIE\*

>SPSA8\_v1\_220004|ID:41145566|bcsP| 31 kDa immunogenic protein [Spirochaetes Bin 1 SA-8]  
MKKLLVIALCLLA V TGAFAQQRFISIGTGGTAGTYYP LGGAMA EIWNKNI AKMNATAQST  
GASIANVNLLRDGKVDV IILQNDVAFYALHGV ELLQDKAYKDIRGMA CLYNETVQLVALE  
SSGIKSVYDLKGKKVSVGAAGSGVEANARQILEAAGLTYNDIKVQYLSFGESASNLK DGN  
IDAAFTTGGFP IAAIQDLAVSRKTVLVPMDKALVDKLM AKWAFYTPTVIPAGTYKGIDVA  
TPSVAVKSM LAVS AKLDANLVYEM LK TMYENGPRLVA AHAQGANIKLETALDGMSIPLHP  
GAEKYFKEFKK\*

>SPSA8\_v1\_220005|ID:41145567| conserved protein of unknown function [Spirochaetes Bin 1 SA-8]  
MRPFKFFRGNLEKRKAAVFFVAFLLVCGFAALFLLQRIPSLSIYDEHGRL LKKMPLPDGE  
FVHHYIHSIHKTPVDEVFIVKNGELILTQV TYDSYGVGMPTGEEEGFTLQDGRFIVNLRR  
TFKQIDIRVSPVPDHG IILGDILYRFTDWAGVEDLLVLKPSVSYSIHFGRNSLP\*

>SPSA8\_v1\_220006|ID:41145568| TRAP transporter, 4TM/12TM fusion protein [Spirochaetes Bin 1 SA-8]  
MSEEIKTEDQAIDSQEILKKFDKEADYRITYTGFFAKAIAALAITFSVFQLYTAIFGVLD  
MIQRSIHLSFGLCLIFLLYPTSKKWSRSLHPVDAILAVLGVLAPMYIVMNYQSLVGRAG  
QTTTFDLIAGIIGIILVLEAARRVVGIIIVISLIFIYAFLGPYIPGKMAHRGARVDTL  
VQHLYFTTEGIFGIPLGVSSTFIFLIFLFGAYLEKTGLGQLFIDLANA VAGWAAGGPAKV  
AVXSSALMGTVSGSSVANVVGTSFTIPMMKGLGYKPEFAGAVEATASTGGQLMPPIMGA  
AAFLMAEFTNVPYARIIGAAAIPALLYFYGWVSGVHFEAKKLGRLGLKREDLPKFKVIML  
ERGHLMIPLIAIHYLLVTGFTPMKAALWAIVLSILASMIKSTRIKPIDIKGLEAGARS  
ALGVIAATACAGIIGVVTLTGLGLKLGSTLVEIAQGNLIITLFFTMITSILLGMGVPTT  
ANYVITSTIAAPAIVMILAQKAGLDPNVAAPAAIVLPAHMFAYFGIADVTPPVALAAF  
AGAGIAKANPMKTGFNASKLAIAAFLVPYIFVLNPQMLLFNVT AIDMIWMLITSLVGIVG  
VAASVNGWFLTNMAWWERLMGAAGLLLIVPGLVTDAAAGLGLVGLVLILQRIKKAKKA\*

>SPSA8\_v1\_220007|ID:41145569| Aspartate kinase [Spirochaetes Bin 1 SA-8]  
MKVLKFGGTSVGSVQSIEKLIGIVRQSGERIIIVSAFSGVTDMLIRAVNQAASSGDFRDT  
LESLETRHFDAARSLISSAANRPDSLHEAERHIASMLGEIENLLTGISLLHEKTPRTMDL  
AMSYGERLSAYIIAKAFTARGMPAEFVDAREIVRTDDQFGSAHYLEQESRELIRARLVDN  
ASIAVVTGFIGSTDSGITTTLGRGGSDLTAGILGAALDAEEIQIWTVDVDGILTADPRLVR  
DAFVIPEISYAEALEMSHFGAKVLHPPTILPAMVRGIPIRIKNTFNADAPGTLIAKKAAS  
SGFPVRGLASISEIALIRVQGPMPGVTGIAARMFGALAGAQVNVILITQASSELSICCA  
INPLDSQKAVKAISGEFELEIKAGLIQKPSIEGLSVVA VVGGERMKRKTGISGKVFSALG  
RNGINVVAIAQGSSELNISIVVDRDRGKALQTIHDAFFLAGIRTVNLFLVGTGLIGSTL  
LAQIARQQGDLRSKHSIAINVAGICNSRYMLLKEDGIGLETWRDVVASAEKADLDAFIDG  
MITMNLPSACFCDCTASDEPGKRYEKILKSSIAVVTNPNKRANAGEKAYYNRLINLSREKG  
NIYRYETTVGAGLPVIGPLQDLVASGDTIHRIEAVLSGTISYLFNTLEEGRKPFSEIVKEA  
KAKGYTEPDPRDDLSDALDAARKTLILIREAGFNLDYKDIRIEPLLPQSCLAAPTIAEFLE  
ILPSVDEAYETKRQEA AKHGNVLRVYVSEITPVKASIMLKEFGPRSPFFNLAGTDNMVVFT  
TDRYTENPLIVRGPAGADVTAGGVFADILKLAE\*

>SPSA8\_v1\_220008|ID:41145570|gcdB| Glutaconyl-CoA decarboxylase subunit beta [Spirochaetes Bin 1 SA-8]  
MSEFLTEFVQSTGFVNISAGQILMLLISFILLYLGIIYRKYEP LLMVPIAFGMLLANLPIT  
GIVDGPVQMPGGIYYLYQGVKLGIIYPLIFLIGIGAMTDFGPLIANPMSLLLGAQAQLG  
IFIPFIATYIGFDL KAAASIGIIGGADGPTAIFVTSKLPPELLGPIAIAA YSYMALVPL  
IQPPIMRAL TTPKERMVMAQLRQVSKTEKIVFPIAVTVLVGLLLPAAVPLVGLSMIGNL  
FRETGSTDRLSDTAQH ALINILTIFLGVSVGSTATAERFLNPETLKIIALGLFAFACGTA  
GGVLFGLKMYVLTGKGVNPLIGSAGVSAVPMARVSQVVGAEADPTN FLLMHAMGPNVAG  
VIGSAVAAGVLISILG\*

>SPSA8\_v1\_220009|ID:41145571|gcdC| Glutaconyl-CoA decarboxylase subunit gamma [Spirochaetes Bin 1 SA-8]  
MKQYRITVNGQSYDVLVEEVSAGSAATASAPSAAAPRPAAPAAA VPAATTSAASAGAISV  
KAPMPGTVM SFKVTKGQAVKRGDVL LILEAMKMENEIVAPQDGT VVAFRVPVSASVNTGD  
PLVDLA\*

>SPSA8\_v1\_220010|ID:41145572| protein of unknown function [Spirochaetes Bin 1 SA-8]  
MLNKWLIMIAGVGT VFTLILLAVMLSFFPMIFGGRKEKKHPNPAPIPEMSGPSDHQPAQ  
NQVSKAPVAAENDHSLIAVLTA AIAAASGTSASSFRIASIMPASRQEGSFNTPIWGRVER  
YTRE\*

>SPSA8\_v1\_220011|ID:41145573| Methylmalonyl-CoA carboxyltransferase 12S subunit [Spirochaetes Bin 1 SA-8]  
MDEKLEKALEAKRAKVL AGGGSKRVAAQHSKGGKTARERIEALLDPGSFIELD AFVEHRCT  
DLGMDGVEAPGEGVVIGYGT VNGRLVYVFAQDFTVIGGSLGEMHAAKICKVMDMAVKVGC  
PCIGINDSGGARIQEGVDAL KGYGDIFYRNTLASGVVPQISVIMGPCAGGAVYSPALTDF  
VFMTEGSSNMFITGPQVIKAVTGEDVSADDLGGAHIHTEVSGVAHFRYPDEDSTIAGIKK  
LLSYLPQNNIEDAPILDAGDDP TRADASLADIMPEAPNKPVDVREVIRRVVDAGDFFEVQ  
PDYARNIVTGFARLAGRSIGIIANQPAVLAVLDINASDKASRFIRFCDSFNIPLVTFTD  
TAGYLPGVGQEHGGVIRHGAKLLYAYSEATVPKMTVILRKA YGGAYIAMCSRHLGADQVF  
AWPTAEIAVMGPEGAANIIFKKEIDESSDPASTRKAKIEEYKTNFANPYKAATR GYVDDV  
IDPAQTRARLCAALSMLL GKRQTLPSRKHGNI PV\*

>SPSA8\_v1\_220012|ID:41145574| conserved protein of unknown function [Spirochaetes Bin 1 SA-8]

MKLEKLDHIGIAVEKLDLSDLAIWEGTLGLVLHGTEEVVEQKVRTAFLPLGESEIELLEST  
DPEGPIAKFIAAKGQGIQHLAFRVDNIEAALEELKAKGVRLIDEKPRYGAGGARIAFLHP  
KSTGGVLIELCERK\*

>SPSA8\_v1\_220013|ID:41145575| putative enzyme [Spirochaetes Bin 1 SA-8]  
MQTNHEDLAQRCLSGDIRAIARLISLLEDGDRQAYQIFGTLKNSLGRAQVIGITGPPGSG  
KSTLTDKMITGLRKRGRVGVIAVDPSSPFGGAILGDRLRMQGHATDPGVFIRSLASRG  
TLGGLSKATASAVHILDAAGYDCIIHETVGVGQSEVDIVKVADTVILVSVPLGDDIQVI  
KAGIMEIGDIFAVNKADRDGADRVRREIRAMLETQAMLKFGKAVPAGPDTLAARNAEAVH  
HGRLMETPQKTETEQDPHALELPPVLKTVVAETGEGVDVLLLETALKQFETARLSGELEKR  
RMRAIRAQLQDLVSWQVMEYFLSHEGVRHLDRLSKAVFSHSIDIYSAETLFEEFFHGGI  
K\*

>SPSA8\_v1\_220014|ID:41145576|ylik| fragment of methylmalonyl-CoA mutase (part 2) [Spirochaetes Bin 1 SA-8]  
MERKIRVLVAKPGLDGHDRGAKVIARALRDAGMEVIYTGLRQTPEQIVQAALQEDVDVVA  
LSILSGAHNHLFPRVVELLENKAEDILVFGGGVIPEDDIPFLKSKGIAEVFGPGTPTS  
TVDFIKANIKRK\*

>SPSA8\_v1\_220015|ID:41145577|ylik| fragment of methylmalonyl-CoA mutase (part 1) [Spirochaetes Bin 1 SA-8]  
MSDFEKLEQELNGWNAKVDKSIKFKPERKAKFVTGSNAPVERLYTPLNLKNQDYLQDVGL  
PGEFPYTRGVQPTMYRGRFWTMRQYAGFATAEESNARYKYLLEQGQTGLSVAFDLPTQIG  
YSDHALAAGEVGVKVAIDSLDMETLFGGIPLDKVSTSMNTINAPASVLLAMYIAVAEK  
QGVSPDKLNGTIQNDILKEYVARGTYIFPPAPSMRLITDIFEFCQKQVNPWNNTISISGYH  
IREAGATAIQEVAFTLADGIAVVEAAIKAGLDVDDFAPRLSFFFNAHNDLFEEVAKFRAA  
RRVWAHIMRDRFGAKNPKSWMLRFHTQTGGSTLTAQQPENNIIRVAIQALAAVLGGTQSL  
HTNSKDEALALPTEDSVRVALRTQQILAYESGVAETPDPLAGSYVESL TNSIEEGVLAY  
IKRIDDLGGAVKAEQGYVQQEIQDSAYAWQMDVEKGERIVVGLNKFQIKEMPPKGLLRV  
DPSVGERQVAKLKALREKRDNAAVQKALDNLKLAQAQGNNDLMPPIAAVKTYATLGEICD  
VLRVFGGEYRPSVMF\*

>SPSA8\_v1\_220016|ID:41145578|korC| 2-oxoglutarate synthase subunit KorC [Spirochaetes Bin 1 SA-8]  
MRVEFRLSGSGGQGLLAGIVLAESAILDGKNAVQTQSYGPEARGGSSKAEVVISDIDD  
YPKATDPDYLLALTNDAYKTYGKLMTKGTIIDDVTRDPEITAKTISLPILETAACKVG  
KTVVANIVALGVLGGISSIASVDSMKA AVKARVPKGTDELNLKALQAGLDLAAESVSSR\*

>SPSA8\_v1\_220017|ID:41145579|korB| 2-oxoglutarate synthase subunit KorB [Spirochaetes Bin 1 SA-8]  
MAEILDYFRKERLPSIWCPGCGHGTVTGALIRAIKLDKLDKNNIVMVSIGIGCSSRAVGYL  
DFDTLHTAHGRAIAFATGVKLAKPNLKVIVMTGDGDCAAIGGNHFIHAARRNIDITTIVM  
NNNIYGMTSGQYSPTTPHGM LGTTAPYGNVEYAFDLCELAKAAGATYVARATS YHVTLL  
DLIEKALQNKGFVVEAMTQCPTYFGRKNKIGGAVELLNWIKDGTINVKAAAALPPEKRE  
GKILIGELHRAERPEFTASYLEMTSKVQRTYNDYKGGNRGCELNSD\*

>SPSA8\_v1\_220018|ID:41145580|korA| 2-oxoglutarate synthase subunit KorA [Spirochaetes Bin 1 SA-8]  
MPEIVKLMQGNEACTMGALAAGLDFYAGYPITPSTEIAEMCSEELPKVGGRFIQMEDEIG  
SIAACIGASLTGKKSMTATSGPGFSLMQESIGYASLCEIPVVIDVQRMGPSTGMPTSPA  
QQDLMQARWGTHGDHAVIALAPGNVKECFDLTFKAFVLSEKYRVPVIVLTDEVIGHMREK  
VIMPDPRYKIPVRAMPATPAGYKPYEADPDGGVPLMAPFGKGYRWHCTGLFHDEKGAPS  
GKASVAETLLYRLKRKIEKNEAELVDYFAESMEDCDVAVVSFGSSAMAALS AVRKARAQG  
LKAGMLRIKTVWPFDAAVRELTKTAHTIIVPEMNQGMAL EVERVTRCNAKVVKLGKVN  
GDLFRPEEVFEVLKEAF\*

>SPSA8\_v1\_220019|ID:41145581| Ferredoxin-2 (modular protein) [Spirochaetes Bin 1 SA-8]  
MAEQKKG YFHIREKYCKGCGICIAFCPKQLLVLKNGKVFPERPEICIGCHMCEYRCPDF  
AIEVKPIVEETNHSADVEGLDYSLPPEAHHA\*

>SPSA8\_v1\_220020|ID:41145582| conserved protein of unknown function [Spirochaetes Bin 1 SA-8]  
MNHKIRDLTLRDGQQSQFATRMNQAQIDTVLDEYRNAHFYAMEVWGGAVPDSVMRYLN  
ENPWRLEKIKAGIGNVSKLTALSRRGNLFGYNPYPDSVIEGFCRNAISSGIDIMRIFDA  
LNDIENMKSSIRFVKEAGGMADCAVCYTMDPKFTIGEHIHAFSGKALPINLFTTNYVE  
KAKELEKLGADMITIKDMAGLIEPAAA KLIKALKNEVSVPIDLHCTHCTPGYGVASLLAA  
MVNGVDIVDTAILSFSGGPAAPAYEIRIFADKLGDLTGVDNAAVAKIDAHLREARKQLA  
AYDQYKKLPPVLDLSKTAISQDLNLLFDDALEATVGKKYSKALELCRKIEAFNYPEPDK

IVQHAQIPGGMYTNMMSQLKEAKLEQHLLEEVLKA VPIVRLDCGVPPLVTPTSQIVGVQAV  
 NYVVSKTQGKDPYSNISKNF AELVKGSYGKTPWPVDPEFRFRVCGTREEIPYDTSAYKKQ  
 ANPLIPEAGNMMLAMNEKEELLLLELFPVADRFLRGKRISWKA AHPGEEPAPISASDGA  
 QAISSAAGTKGSVMAPASFAVPAPPAFSSNAASLPDDYAIRDGELSPFEWDFAIQNAE\*  
 >SPSA8\_v1\_220021|ID:41145583| Phosphate ABC transporter, inner membrane subunit PstA [Spirochaetes Bin 1 SA-8]

MEFENQFEKSANRTRRRHRKDKFFALSLILPGIIVLAILVLILIMLVAKGVKAFNPDPFFLS  
 VQKPFVVEGGIVNGILGSLILAMASLISPLSLIFSVTLIEKKDSRIARLLELCLSSF  
 QGVPSIVFGVIMYSWL VVPLKSYSALSAAIAVSFIMIPTVSATIKEVLLLVPSYKEAAI  
 SLGVPRWKAMTGVIVPSAMPGIKGAVALGLARIAGETAPLLFTA FGNPFLSLDPAKPVSA  
 MPLIYDYIKSPYADWHQKA WGTALLVLMVFALTLSISARQKNAHPH\*  
 >SPSA8\_v1\_220022|ID:41145584| Phosphate ABC transporter, inner membrane subunit PstC [Spirochaetes Bin 1 SA-8]

MNDRRYDSILTGA AVAGILLFMVFLATLVLQSIPIQANGLGFVTGKEWNPVTVKFGALP  
 FIAGTLLTSLALALSLPFLAIGIVLGEYASESKISTVANTIVNLLATIPSVVYGLWGL  
 AVVVPLVRNIELALGVPPYGVGIASASLVLAIMIIPYLSSITREVLLNVPSSVKQGALAL  
 GSTRSEMITGIALPYVRSGILAGVLLSLGRALGETMAVTMLIGNATRMPTSIFSIGNTLA  
 SIIASQFNEAESDVHRSGMIGLALILFMITFIMNYLGRRVIQRTGVVHHGI\*  
 >SPSA8\_v1\_220023|ID:41145585|pstS| phosphate transporter subunit ; periplasmic-binding component of ABC superfamily [Spirochaetes Bin 1 SA-8]

MNKTTRVSVLLSMLVIFTLGMGLPVFAQKSGSNITLLGSGATFPAPFYSKIFDVYASTKG  
 VKVNYQAIGSSGGLKNIMDKVDFGGSDSFVKDADYAKYSAPIVHIPTVIGAVVLTYNLP  
 GVTSLRMTGEVIADIYLGKISRWDDARIAELNPGAKLPKMAIMPVYRSDGSGTTFNFTAY  
 LA AISKEWKKEKVG NANSVSWQAGQGA AQNAGVA AVVQQT PGSVGYVELAYANQN KMPVVS  
 IKNAAGNWIEPNLSISKAAALALPADTRILLANTQAPEGYPICALTWIIVYKEQNYSGR  
 TIQQARELANLLSWIVRDGQKYANDLDYAALPEQAVKTA EAIKSITYDGKPI\*  
 >SPSA8\_v1\_220024|ID:41145586| putative acetyl-hydrolase LipR [Spirochaetes Bin 1 SA-8]

LIFRHIETPSIRSMLFERMLWASGLKSSQEETQDFKRRDYSKSISSNPPEYLKLRINIR  
 RETVEGFVPFYLSSRVRATDIQPKTILYHGGSYLFTFTRQHWGFLTRLVEATGCTIIP  
 DYPLAPKHFYAHAYLLLTALYEFIIADIDPGNLLFMGDSAGGGLALGFMSFLRDEGFPLP  
 EKLIMLSPWLDITLTPAIQEVNDQDPFLNVSALKKAGLAWAHGANPRKCLISPIYGRFD  
 GLPELYLFIGTKDIMIADCRRLLGYCLASNVHLNYFEYENMLHVWMLLTFKEAKEAMEQI  
 AEIVESAGKPPVLPD\*  
 >SPSA8\_v1\_230001|ID:41145587|topA| DNA topoisomerase 1 [Spirochaetes Bin 1 SA-8]

MYMTDIKKS KAVPKSGR KPAEKSKTAAKTRSKILVIVESPAKAKTIEKYLGSRYKVLASM  
 GHLIDLPKSRLGVDVENNFEPEYL TIRGRASVLKDLVTEAKKASAVMMASDPDREGEAIA  
 YLIGKYIEDKVPVGPVRRITFNEITQSAIKAAVAEPRDIELPKVDAQKARRVLDRLVGYN  
 LSPLLWKKVKNGLSAGRVQSVALKLICDREREVESFIPEEYWTIEALLKLHRTSLKTELA  
 LFEGEKPALKNEKQTQELIHLREREKAIVSDIRSADK VIRPKPPFTTSKLQQTAAANRLGF  
 TSKKTMQIAQHL YEGVNIGSHRQGLITYMRTDSTRISEGALQEARDWLGENFPAQLPESA  
 QRYSSGKQAQDAHEAIRPTSVSLTPETA AQYLSKDELKLYSLIWERFVASQMIPAVTRVT  
 TADISIGDGIFRTSATSFIEEGFYKVIRIAASKEERTSHVLSLAVGQELQVEKIHGIQHF  
 TQGPSRYTDASI KALEELGIGRPSTYAPIISTLLERYVVTREARQLMPTTLGRMITEIL  
 EQFFPDILDTGFTARMEGLLDEVEEGKSDWAAQMKEFYTPFKQRVDAVMSTLPVKKGAMD  
 EVTDAVCEKCGKPMVKKLGKFGFFLACSGFPACKNTKSIPLAVCPKCGGDIIARKTGK GK  
 RKEFYGCSNYPECDFV TYDKPTDSACPKCGWFLVEKQDKVSGXX  
 >SPSA8\_v1\_230002|ID:41145588| DNA protecting protein DprA [Spirochaetes Bin 1 SA-8]

MKKSRPQTLQTS LFPAFSRKEVQPLPESRQYDILFLLA VNRMHLLRPHEKVLLVQSIFGK  
 EDLVSLLELETIILRKIDWTQWLPLRFWEQAVRDFEYIARYSIRFVSIFDAKYPLL R  
 ETYRPPFGIFVRGVLPDPDKPSVA VVGTRTPTALGVNCAFEISKSLSDSGSCVVSGLARG  
 IDTSAHRGALRGQRTLAVMPGGIDMIYPVSSKPLAAAILDSGGALVTEHPPGTSIQKYR  
 FPERNRIIAGLARSCIVVEAPEHSGALITAEFAADEGRDIFVHKKCLG SVRNAGARKLAS  
 EGAQSIETVQDIYADWAGNFELGERVRARQYGVKACAGNDNHEEGCI\*  
 >SPSA8\_v1\_230003|ID:41145589|xerD| Tyrosine recombinase XerD [Spirochaetes Bin 1 SA-8]

VSQLGSSYKAHLLMVRKRSSLTVEVYLRELSRLEQFLEHSGKTPLTASSEDILAYLVKRQ  
SEGLSRTTMARVVASVHSLFKYLQLEGLREDDPSLLIRTPKQSRTLPEVLRPEEVDRFLA  
SINPDSPNGLRDRAIFELIYSCGLRISEAASLTFDRLYLKERLLRVTGKRKKERLVPFGD  
DALYWLEKYLEEGRPHLAKGKHSNLVFLNQEGNGISRKGIWKRFSGVRAAAGVHAKVHTF  
RHSFATHLLAGGADLRTVQELLGHSDISTTQIYTHIEEDSLREYHKEFFTRN\*

>SPSA8\_v1\_230004|ID:41145590|ftsZ| GTP-binding tubulin-like cell division protein [Spirochaetes Bin 1 SA-8]  
MAIEIIDEANAANPTVIKVIKGGGSSNAVNRMIASGLKNVQFIAVNTDLQDLGRSKAEI  
KLGIGTKVTKGLGAGGKPELGEKAAMEDRNMIEQALRGADMVFTSGLGGGTGTGSAPVI  
AQIARDLGALTVAVVTRPFGFEGKVVNKIAAEGLERLRQAVDTVIVIPNQNLKIVDKKT  
PIKQAFLLADDVLRQGVQGISDLITLAGDINIDFADVRTVMEGQGDAMGIGIGQGENRA  
LDAASKAVNNPLEDAAHIEGAKNVLVNVTGGEDFSLIEYEQIVDLITQKASEDAHIITGF  
VTDKIGDEVVTVIATGFGTSKPSSSSMGTSQSSLKTKSGIRMPNSDYVSPAEMYMTQ  
NSPAVTKGYSFDPANGADELDVPTILREMCFGTEKQGARA\*

>SPSA8\_v1\_230005|ID:41145591|ftsA| Cell division protein FtsA [Spirochaetes Bin 1 SA-8]  
LCIESRRHKLADNYIASLDIGTTSTRVVVGEFNEEDNLEITGVGVAPSTGLRRGVVNLNIE  
ATLNAVNASVDAAELMSGCEIHEVVLGLSGANVDSMNSRGVVAVAGKGREITSEDIARVH  
EAARAVSIPMDREILHVIPRTYMVDTQDNIHDPLHMIGVRLEADMHIITGAVTTTQNLK  
CVTRAGYRVEKRVLNCYAASRAVLTQEEKDLGCLLMDIGGGTTDLMVFSNGAPVYTCAIP  
AGGAQVTNDISIMMSILLDNAEKLKREAAACCWMEAVDPEEFIVVPGIGGRDPSEIPRRKL  
CSIVQPRMEEIFLMAKEKLEKSGYLKEIRAGITLTGGTAQMEGVCELAEFIFNVPVHIGL  
PPVIGGLESEYRNPAFATAVGLVMLAADEMAASALSRGKGLKQGIRPRGPAKQGGSPGKSS  
AGKIWNWLKDKFI\*

>SPSA8\_v1\_230006|ID:41145592| protein of unknown function [Spirochaetes Bin 1 SA-8]  
MIELKEKIQPNTAERAKPKIEHDSASNLLERSTARRESSTPGISSRAQSESFENRVRAI  
PLKPFPTKREKLYDRNAEKLAASAQRHARELERKAEQKKMNARLGIALAILLCLSLALFF  
AIPEVTRITKVNVRGMQTVSETDVVSALGLSSEIHLFNANIVEMEKRISADPRIASVRIQ  
RVLPDKLVVNLAERVPVAVILHTDEFGTQSLVVDREGVVFGKLDGAAQSSLLPVLSGIRF  
EQFTPGQRLPSMILLADLDRLEKTDASLLNAFSEIKIMKVSEDDAELVLYPVTHAIP  
RTQMKLKDAMLGEALLVLDILASRKGTEKIQEIDFRTGTIVYRVKEAQAG\*

>SPSA8\_v1\_230007|ID:41145593| Cell division protein FtsW [Spirochaetes Bin 1 SA-8]  
MKRTGFKEKSFSPSPDPRVTGAFALLLVGFAAMWSSSMGYSLRIGKSASYFALRQAFFI  
LPSVLVVFVFFSLVKLETLRKYVVGILTLMSLISLLPLLPGIGVTINGGRRWVNLGFTNFQ  
PSELWKPMSILYAAHMLDKKNELIKASSGEAFFPFFVISAGIVFIFFQNDFSTAILALIS  
VAAVFWAAGVPPAFFIGVFMLGVISIVLMVGTSEYRMMRIVGYLIPDYDAHGINYQVQNS  
IRAIMSGGFWGKGLGLGTRKLSIPEIQSDFVFAGFVEETGLLGVS SVLACWIFIGYRVL  
KTASNIAGFKAF LAVGLFSL SFQVLFNLGVISGFLPATGIALPFFSQGGSSLIATAITA  
GLIVNTIRDDGFAPLNATGGYHD\*

>SPSA8\_v1\_230008|ID:41145594|mraY| phospho-N-acetylmuramoyl-pentapeptide transferase [Spirochaetes Bin 1 SA-8]  
MLRELLPLVKYFSPFNIFKYLTFRSAYAAVTALLLVLLFGPLVIEKLRVLKFGQSVRTE  
GPQSHLAKTGTPTMGGVLIASVVVSVILWQDVRNPLTWISLFGLVGFCFIGMADDLLKI  
KKRNSDGLSPGKCLFFQFLVSGVAVLLYYQGGQGMTKLYLPFIKQHVVDLGIWIPLAM  
VYVTTWSNAVNITDGLDGLASGLMIMAHAFSILTYVSGRADWAQYLNIPYIKGAGELTI  
FNLALLGACTGFLWFNAHPAEVFMGDAGSLSLGGILGILSLIVKKEILLLLIGGVFVMEI  
GSVMLQVGYFKLSKGRKLRFRMAPIHHHFELSGQKETKVVVRFWILGGIFALLALSTLKIQ  
\*

>SPSA8\_v1\_230009|ID:41145595|murF| UDP-N-acetylmuramoyl-tripeptide--D-alanyl-D-alanine ligase [Spirochaetes Bin 1 SA-8]  
MTDMLKQGLFSCGEAAAILGASCKGNLDSIITAVQVDSRAVVPGS AFFALMGERVDGHDF  
IGKALDAGAVCIIAAENQKAKAFDAMQCCPGWPHIPASVKDSRANPPVVPCLILVPSVL  
NALQKLAREYRARMKSLVRIGVTGSSGKTTTKECIGAILAANFGTEAVAMNKGNLNSDIG  
LALSMFTLKPEHRVAVFEMGMNRQGEIGELAWILEPDYAVITNIGTAHIGILGSRQAI  
EKKKVFSRFTGKQVGFIEWEDDFRDFLREGVNGRVRSFGFSSFGNEVSIAPQGLSGWEIR  
WKNQIIQFPLPGKHNC LDALAALAVADELELDPAATARGLSTVKPLFGRSQIFQGSIDLL



FDCYNANPDSMSQAIEFCDSVPARGRKVLVLGSMLELGEMEEEEHRLLEGEKAYYSSAEAV  
FFFGPETKASLERFSEFMEGTSAVATKAGNATRTVFTDSDMDELAVLSFLKPGDLVLL  
KASRGRALERLADHLQSAGLVKLDSEKEDRHAS\*

>SPSA8\_v1\_230010|ID:41145596| protein of unknown function [Spirochaetes Bin 1 SA-8]  
MNRNRFWVSIFVSLVVFVGLLVQVSRFTMLSRQASRLEMEQEAIAAENRKLEAEIAVLTN  
RTRTDVLAGRSNFVTIQPEEKLTIIEPKKTDSTDPVNTAKLPQGARHD\*

>SPSA8\_v1\_230011|ID:41145597|mraW| S-adenosyl-dependent methyltransferase activity on membrane-located  
substrates [Spirochaetes Bin 1 SA-8]

MTQATETANDHESQHYHYVPVMLPEILELVRSLEKSNPAILDCTIGAGGHAEEAILAALPHA  
HYTGIDADPEAIERAGARLSAFADRLTLINGYFDEAVARLAQDPDFRPFILFDLGVSTH  
HYTESRRGFSFQSDEPLDMRLSPEAELSAADIVNRFREDEIADILYLYGEERHSRRIARA  
VVEARKIAPIKTSARLAEIIAKSVPGDYRHGRIHPATRSFQALRIRVNNELERDSAAIAG  
ALGLLASGGILAVISFHSLEDRIKQVFKQWSTEHGYTLIWKKPCSPREEEILRNPPSR  
AKLRAIQALASEGRR\*

>SPSA8\_v1\_230012|ID:41145598|mraZ| Protein MraZ [Spirochaetes Bin 1 SA-8]  
MNLTLTGEFRNTLDEKGRSLPARLRSELPGTSLVLTQGVDKCLWLFPPQLWQELSDKLM  
STSLFQARSRLVQRRILAPAQVEIDRLGRISIPQSLREWAGLKGECIVLGITKYIEIWN  
AEEYQKYLDANESEFLQATEGIEGLTL\*

>SPSA8\_v1\_230013|ID:41145599| conserved protein of unknown function [Spirochaetes Bin 1 SA-8]  
MSESALYSSVSSQFDHVIRDPVWGDIPMPESIFELTRAQPFLIADNIRQLGPVSMVYPGA  
THSRKAHSIGVYSLARRMLLALIERGQISFVSREGARSFLVAALCHDLGHYPYAHSLKEL  
PLTSHEALAGDIMLEEMRSLAGSCGADPEQVAIIDLDRDEPHDRETAMFRRFLSGVMD  
PDKIDYLTRDAFYCGVPYGIQDADFIMRRLFIVDDRLAVDERSEISVEAVLFSKYQMYRA  
VYWHPLVRSATAMVKKSIVLALLGNEIKMQDLYGLDDEGFRSLVLGKSDSFLARRVFS  
GKLLHPVAELSYDPANIVHTDLDDLEKRLGAESALAMAADLPENEIVIDIPEPINFEVEL  
PVMTAQGLEPFIAHSSIFSES AVRDIRNSLRKIRIYAPKKNRDARIQELARQLLS\*

>SPSA8\_v1\_230014|ID:41145600| Methyltransferase [Spirochaetes Bin 1 SA-8]  
VNIQFLHGKSFHAARGFLNHLLEEIPGFTRIDNELISCISIPGKETAMPELPESVYWTRN  
VWEEPFLLEFDSISEAARALKAIQRNWAPYPVHCSSRTMLISDALPPLPTKPKQFPFTLP  
AAPMGAFTLLDEHQLLGSARCSSPFPNGEFSFIEDKEGPPSRA YQKLWEALVLAGRMPAP  
GERCIDAGACPGGWTWALASLGASVTAIDRAPLDEKVAAMERVTFLLKHAFTLKPSELGP  
ADWVFSVICYPEALYRWISQWLESGLAKNFICTIKMQGPSYDRATTRLFAGIPGSRVVH  
LWHNKHELTWMLLSGA\*

>SPSA8\_v1\_230015|ID:41145601|pcrA| ATP-dependent DNA helicase PcrA [Spirochaetes Bin 1 SA-8]  
MNFSKELDPEQYAAVSRTEGPVLIAGAGSGKTRVITYRIARLLLDGVSEKSILALTFTN  
KAAKEMSDRAQELVRKPLKELMVSTFHAFGAWILRHEIHLGWKENFTIYDEQDRMSSVK  
ECAREIGLAMDSIDVQDIVRFISQCKTALLPGRAASEDCYESLEVFRQAGEVYQRLFREY  
RKALYIYNVDFDDLIAMPIELFARFPDITARLRSRFSHIMIDEFQDTSLQQYEFIMAF  
GNNICAVGDDDDQSIYSWRGANFGNIEKFERDHPGYFEIKLERNYRSTSTILKAANSVIAH  
NVKRKKKNLWSPDLQGVPIVCSEEKDEAEAEERIVEKIRLLRISENLSWQDFGILVRTN  
SQARIIETLMEAGVPYRTAGGSPFYQRKEVKDMIAYLRAAANPDDDDVSMRIINVPRRG  
IGKVGLEKMISYARSHNQLHDALEALARSNHPLCQQHATRDAIEFFEYLANARSAMLSR  
KIPVSAQLREMVKEIGYWRYLLEEHKSDDKVAGWKYRNIELLIASIERWERDPDNFDTSL  
FAYLARISLITRDDPEDTEGKVSLLTIHSAKGLYEIVFLPGCEEGIMPHARSVEEGDGD  
IEEERRLFYVALTRARKRLYLSRCLERKHYSQILTPAPSPFLEELPKELVKDEDGSEKDG  
RTEEEIQKELFARFKAKFASRAG\*

>SPSA8\_v1\_230016|ID:41145602| Small multi-drug export protein [Spirochaetes Bin 1 SA-8]  
MTTTTLLLTALLALAPISELRGAIPFVLRGSLPAAVLISIGFNALVPLVVFIFLSTLH  
KFLYRWNL YHSFFDRVVEKTRIKVHPKVEKYGYLGLLLFVAIPLPVTGAWTGALGAWILG  
MQKRKAVPAIAGVCIAGIIVGILVVFVFGAGTRTIFFKQF\*

>SPSA8\_v1\_230017|ID:41145603|miaA| tRNA dimethylallyltransferase 1 [Spirochaetes Bin 1 SA-8]  
LIRLLNTNSLPTDIIIIVTGPTASGKTELLSQLFAKGAPDFFQSLSGKITAPYDHAIEISA  
DSMQAYRGMDIGTAKPDAALISALPHHLIDIKDPDEQYTAGEFVRLADSLIGGMRSRILP  
IISGGTGFYLKNFIIGPPPAPPSDPAVRKQVQEDLRRFGISTLRDELLENADPESYARIA Y

NDVYRLTRALEIIRASGKPLSAFAPSESPRHGYRFLVLGVERPREELRERIERRVEAMFA  
AGLPAEVARLRKMGYNADCPGMQAIGYREFFELEDSGMDAIMAAITLHTRQYAKRQMTFF  
KSLPGIQWIQPEASQLAGKIRDFLMFRL\*

>SPSA8\_v1\_230018|ID:41145604|rpoZ| DNA-directed RNA polymerase subunit omega [Spirochaetes Bin 1 SA-8]  
MIMPLEELINYNKNAYELTVAINRRRAFHLAVMKTDPVEKNGKVVSLATRHIFDKTVEYK  
FITD\*

>SPSA8\_v1\_230019|ID:41145605| protein of unknown function [Spirochaetes Bin 1 SA-8]  
MSSTSSDGSKSESA MIESTGTPRIVSIEILGVSFSIKTDDDPEYIQGLVSELKKRLSDIS  
RQMKIVDPLKLAITNLLTLDEMHSKEQKQTVSRDYEASSLLQDIDKRLGELGL\*

>SPSA8\_v1\_230020|ID:41145606| protein of unknown function [Spirochaetes Bin 1 SA-8]  
MVSLEQIRALEARVEKAVVLIDKLRRENAELEQKLIDATRAEEQVRNAYSELERKTALSV  
RLASESSRIEELTSKAREAEERAKEAELRAAESAERAAAFERKANAAEA EVASYRDRAL  
AAEHRAAELESHAEELRKEQARIEDGLVHALEKLD AFEDLVMGISVQKSTDLEESVQSRD  
EKVEAVDESQSTLVSQDATFHGADNELDIF\*

>SPSA8\_v1\_230021|ID:41145607|rpIT| 50S ribosomal subunit protein L20 [Spirochaetes Bin 1 SA-8]  
MPRAVDGTRRKDHRKILKIAKGYWGRRHSHNYKVAKDAVAKALSDAYKDRRDKKG VFRTL  
WIARINAA CRAQDITYSRFIEGLGKAGITLDRKLLADLAVRDPAAFTAVVDKAKSALQA\*

>SPSA8\_v1\_230022|ID:41145608|rpmI| 50S ribosomal subunit protein L35 [Spirochaetes Bin 1 SA-8]  
MPKMKT KKAASKRFTLTASGKVYK KMNLRHILTKKTTKRKRNL RKPGFVAAGPVHQIKK  
KLLPNG\*

>SPSA8\_v1\_230023|ID:41145609|infC| protein chain initiation factor IF-3 [Spirochaetes Bin 1 SA-8]  
LADKDLRINEQIRVREVRLIDEKGEQRGIVSTLEALRIAREVGLDLVEVAPQSVPPVCKL  
LNYGKFKFEQEKKIKDARKHTKPT EIKEIRMQPKIAGHDLDFKSEHIRDFLEQGYKV KVT  
IRFRGRELAHTEIGEEILKILAKLEGYYVMEKLP LMEGRFMSMVLQPKASIIKKQQAEE  
SPASGVTA E\*

>SPSA8\_v1\_230024|ID:41145610|fba| Fructose-bisphosphate aldolase [Spirochaetes Bin 1 SA-8]  
MTSYKELGLVNTVELFKKAVEGGYAIPAYNFNNMEQLQAIQACVETKSPVILQVSAGAR  
KYANATLLRNMAKGAVEYAKELGYPIV LHLHDHGDSFELCKDCIESGFSSVMIDGSHLP  
YEENVALTRKVCEY AHSQPDYVSVEGELGVL AGVEDDVS AEHSHYTRPEEVEDFV KKTGV  
DSL AISIGTSHGRAKFKPEQCTRNADGVLIPPLRFDILEEIEKRIPGFPIVLHGSSSV P  
MQYVRMIEMYGGKLSDSVGIPEEQLRKA AKSAVCKINIDSDGRLAMTALIRKVLA EK PDE  
FDPRKYLGP ARDELKKLYMHKNLEVLGSAGKA\*

>SPSA8\_v1\_230025|ID:41145611| protein of unknown function [Spirochaetes Bin 1 SA-8]  
MKGVLADIKSKRLLACL LFLAIMALVSCSSEKTNDNGRLHFLFDDAFS QLFPDLTARIE  
KAVQAGSAGQSGPERGRVSPISLKGSI SNLISQWTQKGEPATIIASPLAQKLILDDGRL  
LGS AVL VVPFGDVVYDYESSYAKVAENLAGRLNSIQKKEKRQAVCGVLFQENFMRQASAL  
ARLEGVLKQKAEGASLIKKAALDSDTVDTSRFTAQFEAILKEKPDVLLIAIDHP ELVQ  
RWSRDSQQDKGKLFFAADASSWGGFSFDTRLFNLTILGNEAVMADRVLQKARSIVSGQQV  
SESP ELVALPIRTTWFRK\*

>SPSA8\_v1\_230026|ID:41145612| Hydrolase, TatD family (fragment) [Spirochaetes Bin 1 SA-8]  
VHSRDAFEDTSLV LKTS AASLSVIIIHCFSYSPA EAEQLLRQGFYLSFAGNLSYRNASGLR  
EALRIVPDSQLLLET DAPYLNPEPFRGKHASSADIVRTYEIAASLRNSTSEKLAGIVQQN  
AETIFGTMLF\*

>SPSA8\_v1\_240001|ID:41145613| conserved protein of unknown function [Spirochaetes Bin 1 SA-8]  
MSVKRDFGLRLNRLSQQERNKLISYINIKLASMGLSVYSKEGTGFVELASDMLESFRQKD  
RILASYLPPVDQRIQDFLDA YFSDLGLASMPRIPSKTLVLD RYGMARELSLPPDGHKHVS  
PTLTSYRIRNGVLHNPTNDKRTTEGVFHIAEGGLPVPADKKA VPKLVFARLFEAAFNPPA  
EMLDIPFTAGEGEKARAFLSVLLRPIVRPEVQGYCEERSMEVRFFVPGSLAASLDFVESI  
FGNSGDPFIPENDAALDPLRWTGTTGLIVLAPHLTLLTKKELGLPHYDQATARQRRDGM C  
WKEPTERYNDGKPFKICARDTRGIIVSVIADNYFGYSKKEIKSHISY SANLLGLAE EEEHA  
GGALVFPSYNHGVR FIPDTNLNSRGHSIHDFELLRGRIEVKPEGYAVDLTYPNIIYLPE  
NAVLSLEDQKAHWVWEGREESLRILPGEVYVHPTGYRIHMERHPVSGAWRLIGTAAEALL  
CHKPCTVSGGGKSEIAKPITDAISYSPITIA DFFEDFAAVKKIIEKDYGNRFRDDSENHG  
KDARPILSPKRSLG SVIKLLSPSPLFTDEYNEWLKSIPERIKSLVFLVKRFYTPDWGDDW

LSHFSVDAVNGTTGNILKFQGRPILGSYLRVGRAQNGMQRTFKLRQDFMPAEKRQWEDDI  
TASVVVPSKNLKNLPDWANRHPSLKFCCKNXX

>SPSA8\_v1\_240002|ID:41145614|hutH| Histidine ammonia-lyase [Spirochaetes Bin 1 SA-8]  
METVVLDGCSLTLDALVRIAREKAFVALDETALQRMASRSTVESCVVEERLVRYGITTF  
GKFCNVIISKEDNAILQKNLIMSHACGQGEPLPEDVVRAIMALRANALAVGHSGIRPRTV  
QHLVDVLNAGIVPVIPEKGLGASGDLAPLAHMTLVLLGMGEAFYRGERMAGSKALALAG  
LKPVTLEAKEGLALINGTQVMTAIGALAVYDARNLVQTANLVSSMTIQALRGITDAFDPR  
IHELRRQSGQIQCAADLRRLLENSRLTSRQGELRVQDPYTLRCIPQVHGASIDAIDYVQR  
CIENELNAVTDNPLIFPNPESDNQKQKSSKHKASGHSSEHVHGQDPGDILSGGNFHGQPI  
ALAMDFLGIACAELANISERRLERLVNPALSEGLPAFLTTSGGINSFGMIVQYSAAALVS  
ENKVL AHPASVDSIPSSANQEDHVSMGTIAARKARNIINAQRVLGMELCAACQALDLRA  
IQIGTAETASLLSPRTAEAYTTVRSVSMVDSRIMYPDLDAVASLVADGSFSSGMSEAV  
P\*

>SPSA8\_v1\_240003|ID:41145615| conserved membrane protein of unknown function [Spirochaetes Bin 1 SA-8]  
MQDRMNKKGKGSALPGFGIAVIWGLTFLSIKVAIQEFQPMTLALMRFIMATALVPGIALLT  
RTSLKVARLDLPIAASGFVIGISLYFFFENNGILRLSASESSLIVGTIPVLTLLAEIFLY  
REKPRAKVVLGILFSFLGVALIVLRSEARSSSFDGYLYMAGAAISWVVYSFLTTPVSNK  
YPLLSITFWQIFFGTLGCLPFALLENKSILHVSGAAWLNVVFLGVFGSAIGYWLYVIMLD  
NLGASRSSFVFINLIPVVSVIASFFVLGERLAPLQLLGGAAALAGVYLATARQ\*

>SPSA8\_v1\_240004|ID:41145616| Sodium/hydrogen exchanger [Spirochaetes Bin 1 SA-8]  
VKIRKILLIFLVTASALFAEGTEAPSLTEQMTTIVLQLAIVIFAVRAGGALARKINLP  
SVIGELLSGVIIGPYALGAIPLPFGPGLFQASEGFAVSPVLYAFATVASIILLFSSGLE  
TDIDMFLHYSVAGGIVGLGGVAASYTLGAGIGALLTHQSFFAPGSMFLGIMSTATSVGIT  
ARILSDKKKMDSPGVTILAAAVFDDVIGIVLLAIVMGVVAVLTGHKSGGLSPWGITSIA  
LKAFGIWLGFTALGLIFGKIAELLKMGGEAMYVVLALGLALLLAGFFEMQGLAMIIGA  
YIVGISLSKTDIAYLIQDKLKPLYDFFVPIFFAAMGMLVDVRQMLNPAVLVFGAIYTLMA  
VLAKVLGCGIPALFLGFNMRGAVRIGTGMVPRGEVALIAGIGLSAGILEPSIFGVAILM  
TMVTSIIAPLLSMVLTAGGPGTIKPVKGSVTETISAEFPTRELAELVSTTFLRELEREG  
FFVQLMSIRDISHIRKGDIAISLITGKNFITIETAPEDASFVRATLHETLVKLDANFDR  
LKDSFDPEKLRSELHVDSGRKDTTFRKILDPACVTTELKKGSTKNEVIEELVGLLDKAGKV  
TSREQLLKDILEREARMSTGMEHGIALPHARTTGKISQTLAVGIHKNGVDFQIDGTMCH  
IIALIATPADDEAPHMQVLASLGAILGDDAARMALKNALSPPEVYSILKKA\*

>SPSA8\_v1\_240005|ID:41145617| Pseudouridine synthase [Spirochaetes Bin 1 SA-8]  
MMLTVLFENS DILIIDK PAGLASQP GERV GASVVT LAESQFGFKPYPVHRLDKETAGCMM  
LAKSSRAASEWSERLSERKLRKVYWAVSFSTPSRDMGVFSDSLDYQGKSQKAETFYRVLR  
KFSTENMPKNAAGSAGSEALRMSLLELELGSGRMHQIRRHLLHGLPILGDDKYGDFKLN  
KRIKSLFGVKNLLLWARQLEIPGIGMAVSAQPAHFSRFFAVWDDQEPGQTADSASSDVWH  
\*

>SPSA8\_v1\_240006|ID:41145618| protein of unknown function [Spirochaetes Bin 1 SA-8]  
MAIEPFKLSHGALWLIPDGRVIKIQGFHDSWLR AHGALASGAKNTVEFVQKSGWISAVLH  
DQGFCELIIRSRNEDRLRQAVWNILSVNQGILNKVVIMVVGLEGCLMLGKAEIESREAFE  
RALDSDVFS\*

>SPSA8\_v1\_240007|ID:41145619| conserved protein of unknown function [Spirochaetes Bin 1 SA-8]  
MEGAGLFIGTCGYSYEEWRDAFYPKDLPKQGFLRFYSLIFPFVELDFSWYKMPNPRITLEM  
LANQTTPGFLFSIKAHRSLTHEPSDEWQRDAETFLEAVYPLHNRRKLAGILIQLPYHFSY  
TAENRKYLAELCKILES VPLVVEFRNSQWYLPRVYEELSSRSITLAMIDRPDLEGLPPET  
SIMTTRTVYYRLHGRNSQQWVNGDVTSRYDYEYSEKELKEKARIHALKSKADRIFVAFN  
NHARGNAPSNAKLLMNLLKLEI\*

>SPSA8\_v1\_240008|ID:41145620| conserved membrane protein of unknown function [Spirochaetes Bin 1 SA-8]  
MLISILARILSVITSLYMILCAIRVFMSWAPGLQLGRLDYLLARIVDPYLSIFSRMTLFR  
TRQFDFSPIIALAVLSVANLNFSTLALTGRLTLGFAASLILGAAWSAVSFVLSFLTACVL  
IRIVVYLLKFNSVHPVWMVDSIINPVLQINKLIYRGRVVDYLQGLITGFLVLLFRAG  
LGALIRIVSGLLLALPF\*

>SPSA8\_v1\_240009|ID:41145621| conserved protein of unknown function [Spirochaetes Bin 1 SA-8]

MLTPKTRSFLSGLAAKSPVLMHLGKGGASEAVTAQLETL LAHHEL VKLKFIDFKGEKKEI  
AESLASSTHAELVRVIGNTAVFFRQNPDPDKRKVIVP\*  
>SPSA8\_v1\_240010|ID:41145622| Major facilitator superfamily MFS\_1 [Spirochaetes Bin 1 SA-8]  
MPNAISPGK LQKARSKFYFNFLNSFSFV FVSGSFLTLFAIRLGASKAIVGLLNAVAYLT  
FFLMPAGK KL VQKHPIVKVFGWGWVSRYIALLPVLFAPLLSAKGHNGAALGLLVAGTTGF  
AISRGVALIGNNPVVGFLASGGGEEKPRSDRGQFIVNTSIINSLASMVSGLLIAIFLGEQA  
SPWSYALGVGIGIVTGLAGCILLQTPEPTNYKPKTKNTLLSTTLESIKDPAFKRIFILIF  
MVL SFASGMGRSFLPVYAKDAFHQADDAVMVYSL LASLGAVAMGLLSRLVVDRLGSKPLF  
IIFSALGLASFI PMAIPSGRSVLASGTVAALFLSFIHFLSAFGFSGEENAGQTY YFSLV  
PRNKTL DLSV VYYIAYGMGGALGSGFGGVLLDLFDSFGLSQNNSFRLFYALLSLMLIAAL  
SAMRKLKRLGSASVSESIGVMFSLRDLKAFDLLARLDRSETPADEIRLIHEL GQSPTRLS  
QKELIEYLHSPRFEVRMEALLALEAMPMLGHAATQALVRELEANTYTTAYVAARILGRHR  
IQAAIPVLSKAAMAEDYMLQGSAMVALAKIGDINSIPLIETILQNSRNPRVKISAAAYALE  
LLNARSSLPVLASTLRHDDPPAFVSDEITLAMASILGVMKEFYPLYSAFIEDES DGIAQL  
KSTAQDIIVDVPTLQRWNAAVDALFSKTAPDGKQLSALILDASIDSQIDIILAEALLDPR  
LCYRGLRFLAASYPLFVKRI\*

>SPSA8\_v1\_240011|ID:41145623| MATE efflux family protein [Spirochaetes Bin 1 SA-8]  
MKDLTKGNETTQLILFALPMLLGNIFQQFYNMVDSFVVG RFGTTALAAVGT SFPIIFM  
LSLIMGV TMGSTVLISQFFGARDHEK LKKVISTSYIFLFLAGTVMSFIGVFSSGFILRAM  
SVPADVMP EAAA YLRIFAGMLATFGYNGVAAMLRGLGDSKTPLYLLIASTLMNIVLDLT  
FVLVFWHGWVSGVAWATIISQAVSFIGAIVLLARRKEYVAPDFRHLEWNKEIFSKMIKIGL  
PTGIQQT MVSLGMMVLSRIVNEFGPATMAAYTAAARIDSIASLPAMNLSQAITFTTGQNI  
GAGKAERVKRGHLSAIAVNTAISLVITIAVLLFSKNLMSLFTTNTTEVIAIGSEYL VIVGI  
FYVLF GIMFINNGVMRGAGDV FIPMINTLLALWLVRLPCALLFTRVFKMGTSGIWWSIPA  
GWGIGFV FSTWYYLTGKWKTKAVVKAKREVESIVEP\*

>SPSA8\_v1\_240012|ID:41145624| MazG family protein [Spirochaetes Bin 1 SA-8]  
MNAIKSDLARLAGSSHETILVSAEKAKEAFERLYTIVARLRAEDGCPWDREQTPASIRNN  
IIEEAYELVEAISDHDPHVKEEVGDLFMLASMVSWMYEQNSVFTASEALEEVSQKLIRR  
HPHVFGKSDADTPDKVVEQWNLIKEKVEGKRK KDSMLDDVPRHLPPMERA YKLQKKA  
GFDWQKTQGKTENPPDGLWEKIQEEIQETREALKTGSEEQVEEEIGDLLFSLVNLARHHR  
VEPSLALQKANEKFTRRFIHVEKAMKKAQMPMDA EHLQHMDLFWEEAKSQEQPTRKRENQ  
\*

>SPSA8\_v1\_240013|ID:41145625| membrane protein of unknown function [Spirochaetes Bin 1 SA-8]  
VVQEDSLHGQERAELFRKTGLL FAGLLSLYVLIYIGQIFKLYEKQPLNFDMFLLLIMAA  
VIIAFIASALHEHLNWLQPVL LFFITPLPMFRFGESMFSLGAFSAATILLFRLGFFEKKR  
LKFFLIIMSYYYFCQLLVGITIGAPLLSLVMPLIFMTIFIMFLLVFREKWIYIQNEKP  
ELSLSQLGITKTEAEYLRETLTGKTFKEIAIDMQVKESTVRNTLARVYK KMGVVDKASLA  
TKCEKYLID\*

>SPSA8\_v1\_240014|ID:41145626| conserved membrane protein of unknown function [Spirochaetes Bin 1 SA-8]  
LRVKISCFKFTILTACLILVALLVPGTTYRSLPSFFGIDKLAHLGLFLLFSLSYSLEYKR  
AYTRLPAVSHAFGLFLVFLISELLQLLTSSRHFELTDMVFDIIGASAA YAAVALIGSGQ  
KR\*

>SPSA8\_v1\_240015|ID:41145627|ydbK| putative 2-oxoacid-flavodoxin fused oxidoreductase: conserved protein; 4Fe-4S cluster binding protein [Spirochaetes Bin 1 SA-8]  
MADSKKMVMVDGNAAAAYVAHACSEVIAIYPITPSSPMGELSDEFSAMGKKNLWGTVPQV  
VEMQSEAGAAGAVHGALTTGALSTTFTASQGLLLMIPNMFKIAGEATSTVFHIAARAVAA  
QALSIFGDHQDVMAARQTGWALLASNNIQEVMDMALVAHSATLKTRVPFLHFFDFGFR TSH  
EVQKIEEIPFETMKKMIPEDLVRAHRSRGLSPEHPEIRGTSQNPDVYFAGREAVNKFYAA  
TPGIVEETMNQFAQLTGRAYKLF EYVGAPDAERIIIVMGS GADTVDET VTYLASKGEKVG  
AIKVRLFRPFSVEHFINAIPSTVKSIAVLDR TKEPGSIGEPLYEDVRTAIGEAMGSGKSH  
FKGWPTVVGGRYGLGSFEFTPAMVKGVL DNLAQAEPKNHFTVGIIDDVTFTNLSYDENFH  
LPAEGVVECLFYGLGSDGTVGANKNSIKIIGDETSNSAQGYFVYD SKKAGTYTISHLRFG  
PKLIKPYLITKADFIACHKFSFLEKLDMLVNAKEGGTFLN SPFPADK VWDLEPLEVQN  
HIINKKLK FYVIDAMTIAEKAGMGRINTIMQT AFFKISGVLPAD EAIRLIK KYTEKTYH

RKGADIVEKNLAIDLALNATEEVKIGKADSKLRIQPPVPASAPAFVRETIGEIIAARGD  
KIPVSKLPEDGTFPTGTTQYEKRNIAEKIPVWNQEICIQCGNCTMVCPhAVIRLKA YEPK  
YLEKAPKTFKSADGKGKELAGLKATLQVAPEDCTGCGACVNICPVNDKAVPGRKAINLEH  
QLPLRESEKENWEYFLSIPDTPAKYLNLNLPKGIGMKRPLFEFSGACAGCGETPYVKLMS  
QLFGDRAVIANATGCSSYGGNLPTTPYTKGDDGRGPAWSNSLFEDAAEFMGMRLTADK  
QTEYAREILTSVKGRGVDTALAERILNPNMESDEDIEVQRTAVAEKKAALANNEEWAKE  
LVNVSESLVKRSVWILGGDWAYDIGFGGLDHVIASGKNVNLVLDTEVYSNTGGQASKS  
TPIGAIKAFATSGKETMKKDLGMIAMSYGYVYVAQIAMGANMSQTIKAFREAESYDGPSV  
IIAYSHCINQGIDMMKGMNQKIAVESGVWPLYRYDPRLKAQGKNPFQLDSKEPDYSKLD  
TYMYAEVRFKSLRDANPERAKMLLEKQRVLIERRYKEYRYIADRPF\*

>SPSA8\_v1\_240016|ID:41145628| conserved protein of unknown function [Spirochaetes Bin 1 SA-8]  
MKLLVLAAGMGSRFGGIKQMAPVGPAGETLLEFNLYNALKAGFSQAVFLIKREMEADFRK  
LIAERLPLNLEYEFAYQDVLASVPESVKS KLIPYLASQGRIKPWGTGHALLCAREFLASS  
PFATINADDFYGAFAFKVTADFLQRGAKTAFCLPVYQLGRVLSRNGSVSRAVCDLDSSTM  
LKEIVEHTKVLQKNGQILSVDADGKERV LAPDSPVSMNLWGLTPAIFSYAEALFADFIAN  
ESNWAKNEFFLPYIIRSMLERGTA AVKALPVEDACFGLTNPDDLSEVQSNLAALSRNGSF  
PTPLWKQGGIGA\*

>SPSA8\_v1\_240017|ID:41145629|glmU| Bifunctional protein glmU [Spirochaetes Bin 1 SA-8]  
VRDGLYRYTGLPELFFQDDFAHLKLFKSPGYPWDALKNLPDYLAGLFETLAGGSNPGNSR  
IWTQEHVVEPGAFLGPIFLGEGTIVQAGAYIRGPAWIGRGCEIRQGAYLRGMILAGDG  
CVLGHASEFKYCILFDGVQAPHFN YVGDSILGNHAHIGAGVILSNVRLDKKPIRVQLIGE  
GYQGARIDTGLEKLGILGDACEVGCNAVLNPGTILGAACRVAPVSSIRGTWKEGSILPI  
L\*

>SPSA8\_v1\_240018|ID:41145630| putative Purine phosphorylase family 1 [Spirochaetes Bin 1 SA-8]  
MPVPRFREKFTSKPFFNPSDFLGYMKKIGALS DRPAPRGVILGYQNSLKFYVVENYK TSA  
AEGYFGSYLRYIDEPFAGSGQVAIAANFGIGAPAAAFIIEELI AWGVQEFISMGMAGSLR  
KDLPPGSLVLCTSAFRDEGTSHHYVESDELA YPDPELTLRLEKALRTRNLDFSKGPTWTT  
DAIYRETPAEVVGYRDLGALV VEMEASALFTIARFRNVPIASCFSISDTLAELAWRPEFH  
SDTTREGLEKLFHAAVDALMA\*

>SPSA8\_v1\_240019|ID:41145631|sudB| Sulfide dehydrogenase subunit beta [Spirochaetes Bin 1 SA-8]  
MKTEHLIVSKRQLSEEYRIEVLAPLVARERKAGQFVVVMYDEDEDYSERIPLTIADADPEK  
GTVTLIFQTVGASTHKLALKEPGDSIVLLGPLGNP THIEKFGWAVCVGGGIGLAPLYPIV  
RALKEAGNRVTVISGARTADLLIMQDEMNAIADENIIVTDDGTAGRKALVTVPLAELCAA  
TPPPDIVVAIGPPIMMKFCAETTRPLGIKTLASLNTIMIDGTGMCGGCRVSVGGATK FVC  
VDGPFEFDAHQVDWGQMMSRLGAYKDIEKEAHEKCHLEMSIKQLEKERS\*

>SPSA8\_v1\_240020|ID:41145632| Glutamate synthase (NADPH), homotetrameric (fragment) [Spirochaetes Bin 1 SA-8]  
VPSGNVHQAVGERTIMSHMETSFYQQAQAELEKIRSTPLTPRARMAIPVQDMPCQDPEV  
RRHNMHEVAAGYTREQAILEAERCLQCKNAPCIAGCPVKIDIPGFIRKMKGGDFEGAGQV  
IKQTNLLPSICGRVCPQEKQCQLPCTVGKALGGVDKAVQIGRLERFVADYEREHGLQTV P  
HAGPASGRRVAIVGAXX

>SPSA8\_v1\_250001|ID:41145633| membrane protein of unknown function [Spirochaetes Bin 1 SA-8]  
MNHPWYIVPVAAIFTSFVVQVMNFLIELAEYSIFGFSVLIFGLVSLFVIDTWPWLCVALT  
FGGSFLVFGIAGLIRASGITGKK\*

>SPSA8\_v1\_250002|ID:41145634| Transcriptional regulators, marR/emrR family (modular protein) [Spirochaetes Bin 1 SA-8]  
MKSRTGAKDSLDPDKIIHERSRLRILVFLASSLSSAVGFTELKEGLGMTAGNLSTQIST  
LEEAGYIRVEKRFLGKKPNTSIMLTTEGKTALETYIADIEILMTAARKQEGVLKEAQH\*

>SPSA8\_v1\_250003|ID:41145635| Uncharacterized ABC transporter ATP-binding protein TM\_0352 [Spirochaetes Bin 1 SA-8]  
MESILSLVNVKKIYRKG DNEVAALAGINIEFERQEFCAIVGPSGSGKTTLLNIIGCLDRP  
TEGSVTYLSKPLASLDEKSLSA YRREHISFIFQSFNLIPVLTVVENVELPLEIEGKTAKT  
DVRKKALAMLEKVG LSDKANRYPRELSSGQEQRVAIARALVKDPVVVLADEPTANLDSHN  
AEEIVRLMKKINSDLHTTFIFSTHDRMIMQEAGRIELHDGAVASDTRRS\*

>SPSA8\_v1\_250004|ID:41145636| conserved membrane protein of unknown function [Spirochaetes Bin 1 SA-8]  
MNRTLLSIASRNVRVRYGKRTVITAIVLMFGLACFIFFDSLLAGMDRMTIDAMTDYASSI  
IIRTAHEYQKNHRGLPLDYGIDAPEKLIEDLKQTAPEASGITPRALFAGNASNRIESIPIL  
GTVVDPFRDATVFRIRDAVKQGSWLSPGIEEKTAVLGITVAQDLGLSVGDYFLLSARTTD  
EATNADEFKIVGIVDVPPEINQGGVFISFDNAREFLGSNLPVTEIDIALPRQPSIDAGM  
KKAGEAALKIAQRHPDLATISIADTAKDYMAMRAMKSKFSSIVILVLLIAGVGIVNTIL  
MSIYSRIKEIGVLRAYGMEARHIRRLFSLEGIMIGTVGSLGGALLGALLVWWASTSGIPL  
DMFLGKISVGSIPLAGTLYGEWHIGTFIFSIAFGILASWFSARIPAKKAASLEVTEALRF  
I\*

>SPSA8\_v1\_250005|ID:41145637| conserved membrane protein of unknown function [Spirochaetes Bin 1 SA-8]  
MKVFSMAIRNLQRNRRSLLAASSVFLSIFLVIVLQGFMDGFLDSLIRNYTKNETGHINI  
TTAEYRERARFMPVDTFLEDYAALSDAIRTELGSIGNTAVIAPRIRFGVLLSSGNLTRQA  
LALAGDPEIEKKLLMLDKRLLPGGQYCDSPGTVIIEKLANDLGLSTGDAIKVVAQKADG  
GIGFKKLKISGLFRTNVNSLDESVFQMSLNDASLLAMGNGTQQLSIMLPASENSASRAA  
SLSRQLESKGFAGLSVLPWTAIGEYPKIVAMAGAVYFSMYIVIALLGAFIANIMTMVVV  
ERKREIGILMSMGMKSNLLSLFLLEGSMLGFIGAVGGSIFGLAVTGIFSKIGFDLTSSM  
AGFSWPLDNIHTRFSIGAGIAGITLGTAVAIVSWLPSWRAANLPPVEAIRSI\*

>SPSA8\_v1\_250006|ID:41145638| putative Negative regulator of sigma E activity [Spirochaetes Bin 1 SA-8]  
MKRESFVMLACFVFFMMTGMTYGGSAQSIIEKVEANQTYQSIYEGTMEIISGSRIMTKT  
MKAWTVGSDKAFIEFTNPEDRGVRMLKLGKNLWMYFPSEKDTIKITGALLQQGMMGSNIS  
YEDMMEPDILKSKYEASISGEETINDRSCVILTLKALSSAVAYSKRVIWVDKEHFFAMKT  
ELYSRGGQLLKTISTLSTEKIGQRYFPIKIEVIDGLKKNKSTVFSMRSVSDIKIDESIF  
SLKALSK\*

>SPSA8\_v1\_250007|ID:41145639| protein of unknown function [Spirochaetes Bin 1 SA-8]  
MKKAFLTAIALAAIANFSFSQEISFRLKLEQAASADFSMSYFTSIDFGGSSSASLALKMT  
QGAFSMEGSGSGTLLYGTNAENLLAAKALGKNQFLEIIPDLSVITLDLRLSTFFASFAS  
GNLKLEAGLSQINWGTGKVFSPADIFARYRRVGLSTEREADILLRAFVWYSGPTSIAEAVF  
VPYLPYLHEKSGLAFGARFYTALFDTIGAGLQAAWFSAHGLEPAAAVMAMEAQTDLWFFT  
PSLEAKLSIPFDDAQHPVWQMMAGLTIPFGSVSFAEYLYDAAGVFHHSVYASLSLKADE  
WITLSLPILLYPENGGFFQGGVSTAGVQLLGAQMTCSALISHFAPGAFNIQFSAYLTKKF\*

>SPSA8\_v1\_250008|ID:41145640|ileS| Isoleucine--tRNA ligase [Spirochaetes Bin 1 SA-8]  
VYKNVDPKVSFPKLEEDIVRFWEENKTFQKSVSEREGQPDFVFYDGPFFATGLPHFGHFV  
PGTIKDIIPRYKTMKGFHVERRFGWDCHGLPVENLIEKELGLNSKTDIETFGVANFNEAC  
RSSVLRVNEWRAIVTRLGRWVDFDNDYKTMDPDYMESIWWVVKALWDKLIYEGHYILP  
YCPRCSTVLSNHELSLGGYKDDHDPAITIRFKIKKAPAGLEDLADGSTYLVAWTTTPWTL  
PSNLALALGPDIDYVCVIDGNERYILAESRLGAYYKDSASLTLAWKKKGSELAGLTYEPL  
FPYFADLEKEGAFVTVTGAHVTTEDGTGIVHTAPGFGEDDYQVLKGTGIPTVCPIDAECK  
FTDEVPDYKGFVKDSKAIIDRLKKEGRLVKREQILHAYPHCWRCDSPLIYRAISSWFV  
KIDPIKQKMLQANKKVYVWPAHIRDGRFGKWLENARDWAISRNRWGNPLPIWKCDTCGE  
TVCIGSRKELEEKSGVYPQDLHKHFIDGITFPCSCGGTMKRIPEVLDLWFEWEGSMPYAQS  
HYPYENKERFEQDFPADFICEGLDQTRGWFYTLTILAAALFDSPAFAKACVVNGLVLAEDG  
KKMSKSLRNYTDPMEVMNKFADALRIFLMNSAVIKAEDLCYSDEGVKEVLKSVIPIWN  
AYGFFVTYANIDQVQPSDPLPGSLANTLDAWILSVCEKMLVLEVTEGLEAYDMQAAIAPIL  
EFIDSLNWFIRRSRRRFWKSSENDADKAEAYNTLHRVLKRLVLVSAPIMPFITEAVYQNL  
KTAGEPESIHLCWPEYDERFRNPALERDMASVRHAVSMGRALRVANDLKIRQPLASACL  
VTKDETERSVLARMEEILRDELNVKSILLKDNEEDLVEYSAKANFRVLGKELGKDMKAAA  
AEIEKLSAQQIIQLINGQTIQLAVGERTVSLTKDGVDIRRTEKAGLKVLNEGTLTVALDT  
TITKDLLNEGYVRDLIRGIQNLKESGLEVTDRIHLSVSGDEDLAEAFRQFHALVAGETL  
ASAAEWKPDLGSEAVSIEAGEKTNWAAIKKA\*

>SPSA8\_v1\_250009|ID:41145641| conserved membrane protein of unknown function [Spirochaetes Bin 1 SA-8]  
MFQSRNEQLNNSRDFKLFILASVFMGLGACVNSSXFNNYLHDXIALDMVRRTFLEIPREM  
PGFLVSLFVGXLAALGDIRIAGLAQITASLGMLALGWIPPNYVLMGLMLFIYSSGTHVYM  
PLGNSIGMSFSETGNEGRTLKIQASTTLALVLGAGALLAFKYLNLGYRLAFTLGLSLCY  
AVSGLFLFSLTPRPKAKNPTRFVFSPAYSRFYLLSILYGARKQLFLTFGPWMLVDLQKQP

VATMSLLFFVSTGNVIMKPAVGRWTDTRFGPARILLAEALFTIVICLLYAFSPLLL PWKI  
ALVVVCLCYIADQMADSVSMTRAIYVKNIVKKPEDLSPTLSLGISIDHIISMVLPVAGSM  
LWLKSGSRGYTWIFLGGAVVALINVAVSLGI AKKGKSR\*

>SPSA8\_v1\_250010|ID:41145642| exported protein of unknown function [Spirochaetes Bin 1 SA-8]  
MHKGRNLFVVLMTIAALLASCASNPETPKPENPEPTTTTTVAAPTPEQTPVTPVTTVA  
AAPLEAPKPSVSEVELRNLFQGANALRSDAQKLQDEL VPEEFASAETAFTKAKTAYDKA  
LDAALFDGVAAYPVKGLLEESITQWEA VIAKGLPLRSDAEQEKARDMRFMAMQVDAPALA  
EERFQGAEQLLGQADAFARVEDFELAI PA YKQAAA AFDVSAEMAKANAYKQKIEANDYAR  
FNPNYFEMAENKYKMEADY WDSGSLEDLVNGADVLREANYYYDYVIKSGAEYRSFEGKDA  
ALAAQAKALGIKADVNAPDEYSSANDILNEGLANQQAGNYESAYLWFRDAVPAFDAAHDA  
SLALQAQNELVIAEAAERIEAAKAKSDEAEIDNNPYLAAADESLAKARALYSEKHFDDSI  
MDANEAVNFAGMSDTFVDKILEREAAAARLLAEAKAAADPAMADARNRIVWANNNNIKA  
DYPNVHKQASASMTAAEMAYDNER YVPAKALAEVSSVLSDDFQAKVLADRKAREAEKAR  
IDEIEKAKEVASVALKNAEARMAWANENKIKADYPDEYNAASSAMIAAYTAFGNENFNLA  
TQKAHEVSDILSDDFKASVQAARDAEKARLEQLAKDRAAADPALADARNRIVWANNNNIK  
ADYPAEYKQASSAMTAAEMAYDNER YVPAKALAEVSGILSDDFQAQVLAERQAKEDKA  
RLAQLAIDKAAADPAMADARNRIVWANNNSIKADYPAEYKQASSAMTAAEMAYDNER YV  
AKALAEVSGILSDDFMAKALAKKNEPEQTPPTPTAPAQPSQPAQPSEPVKPVVDQTAQ  
LKAAAEQNI AKANDKLA WAVSKNAKNNYPELLAKGSGELDSAKAAAFASNNYQEASDKAVA  
AFNTLSAIAEFAPLPAKYTVRLIPERRDCLWRIAEYPIFYNNPLKWPVLYEANKKTFKDP  
SNPNLIFPGQVLQIPSIKGEKRDGMWDPKKTYPQPLAK\*

>SPSA8\_v1\_250011|ID:41145643| putative M18 family aminopeptidase 2 [Spirochaetes Bin 1 SA-8]  
MKESTNALCQFLDASPTS FHAADNIRS YLLAHGAQELDEAASWQIEPGVPYFVCRSGTSI  
VAFRAGLKSMGDAGLVIAGAHTDSPGLKVRPGTHKQNNQNMVRIGVDVYGGAILSTWLD RP  
LAVAGRLFLRDESESPASLKS VLYNSGKPVGIIPNLAIHLNRDVNRGFEYSPAQHLPVLS  
SLREKSDTQSANLSWLHEYIGEDTNLDIEPGDIVASDLFFYDTQKSAIFGTRHQ SALPDD  
QERDILVNAPHLDDL AGCHAILEAFSSA VPSEFGQVACFLDSEEIGSMTMQGADSSFVRD  
VLARLAIVTGAGAEDFYRMSRSLFVSLDAAQGWNPAYPEKYDEKLSPLL GAGPAVKINA  
NQR YATESHVESLIAIANQEKIPLQRYMSRADMQPGTTIGPMSAARLGIRTIDIGHPLL  
SMHSIRETINSFDHAMMIRLLAAVYKNPPIFS\*

>SPSA8\_v1\_250012|ID:41145644| Uncharacterized HTH-type transcriptional regulator in himA 3' region (modular protein) [Spirochaetes Bin 1 SA-8]  
MSGYTTGEVEELLDLPASTLRFWEKEVPFLTPRKDVFGRRVYSPLDLCILSRLKFLALKR  
GLGLKKACAMLEKELFLADPTLKSEIXQAKINLLSLKAESRXIREKXSVLHPDPYAAEES  
AXNIVSPASKLNSPSLFEQELS\*

>SPSA8\_v1\_250013|ID:41145645|der| GTPase Der [Spirochaetes Bin 1 SA-8]  
MKEIETGKSHSAHSSGGRVRKTA AIQKKPEKSDNDTIQDIAEGLPEKLVRYENLPQVVLV  
GRPNVVGKSTL FNRL LHKRRAITDPTPGVTRDPIEEECVLPGTEHRVRLVDTGGFKLREG  
LDDL VVARTLSILSRADLILFMVDAVSITPEDEEFAELLRPM SDRLLL VINKADXPEDY  
QAWAHMKWGFPATL FISA EHN RNIEDLVEAIASRLDFS AVKTVDLERADIRI AIMGK PNT  
GKSTLLNVLGERSIVSDIPGTTTRDIVEGRFTWKGRGIVVLDTAGIRRKKKVNDNIEYY  
SVTRLSAVTQADV VILMIDAQEGLTDQDKKIAAFVDEGRGVIFALNKWDLMPDIKNSF  
EAARDKLR YFFGQMAWAPVVALSAKDGQGIDKLMNTVISTYSKLCR KVETSRLNKAVAQW  
METTPPVAPRTKFKLRYALQ TSMNPQKFTFFVTKPEAVADSYVSFLKNRIREEFDLGTI  
PVMLELKASRKDWRE\*

>SPSA8\_v1\_250014|ID:41145646|ptsI| Phosphoenolpyruvate-protein phosphotransferase [Spirochaetes Bin 1 SA-8]  
MREIHGIAASPGMASGPAFLFYDEVTDNVPTYPIASETVEAELERFSSAVSAAKKEVELL  
RDRAFKEAGESQA AIFDAHLLMLDDPEVAERVKNDLYSTLMNVESIVFALAREMVDQLSA  
SNDPYMQERVSDVHDVTRRLGHLLKRERINLADLQDDVIIVAHDLLPSDMVGM SRHHVK  
GIATEAGGRTSHAAILARAFEIPAALGLGSFMSDLKMGTKVIVDGDKGILVVDPDDESALK  
KVQASMLLRLQKVKEFENIKALPAATKDGTRILLKANIEVPEEVESVVEHNADGIGLFRS  
EFLFLGGHIPGEEEQFRAYKAVVEAMNGKPV TIRTLDIGGDKVLP ELGAQNEKNPLL GWR  
AIRFCLSKTEIFKTQLRAILRASVFGNVHIMFPMISTTEEI IKARGLLGESKYECRAQGY  
KVPDHIAKAGIMIEVPSAAICSDILARSSDFFSIGTNDLTQYTMAVDRGNEKVSALHEPFN

PAVLRLIKTTINNAQHACIDVSLCGEMAADPYAAVVLVGLGMRELSMSSASIPAVKKQLL  
SITLED AENIASAVMKMTSANQVLTYINNRFAL\*

>SPSA8\_v1\_250015|ID:41145647| LysM domain/M23/M37 peptidase domain protein [Spirochaetes Bin 1 SA-8]  
VRRNRSHWHNEIILLFASGSTLKRITLALVCLITLLGSSFRPQPSPEFAKGSIDMEGSL  
ASISSEDESAGEGLFYTVYQVQKGDITISGIAESNLTADTIISINGIQSAKSLKPGQLL  
LPNMSGIITYTAKAGETVAIAIAKKFEISEDRLIVANSLMKTDFSAEKVFLPLDARLPKAQL  
REISGDLFKWPVRGVITSWYGWRRDPFSGRNSLHNGIDIGVPTGTPVGAAMEGTVIETGY  
SPIMGKYVILSHAGGWKTLYAHTSSILVQEGQYVSKGSRIALSGNTGYSTGPHLHFTVYK  
NGKPVNPANVLQ\*

>SPSA8\_v1\_250016|ID:41145648| protein of unknown function [Spirochaetes Bin 1 SA-8]  
MSFKKKQHLRPLILVILLFLTASICPALEIKTDNYTITTEAVTSPGFALVSITSNASGTL  
IQIDNQT V GSSPWTGRLAAGNHIINMSAPDHYDLRFLTTCQENTKYSISCRDPHTGFLD  
VTIRPEDAML YLDGVKMNQFAEVPVGYHTIAARKFGFEEKSLKILILK GKISRVSMMLE  
PSSFSVRDFRLTRKVFNPNDHGLFGKTTLAFSVTAPGYGRIERDSTGSLIFQHTLLPFT  
TWAQSF SWNGRTASGSAKDGSYTARLLLWPEKKQETPAVSAAPVPGDFTRTDSAEQASIV  
QEISFRIDRSQIIPAGYENARTGLAFVSNPSMQELPVFGLDIGGVIA YDSTASASAGVG  
LSGGIRLGSSAALGFAGSFFGNGDAGLSASLNGAVLKGPQLDAAISARYEIADFSNSGGG  
ISNDIELNFPLAFKTGAVRIGLEPGIRLNLD DTSIAPQTGVGLWYQSPALFAGFSAHQVF  
APGGIACDANPLSLALDAKYMVNGVPLTMGVRFS AEMTPEFEKLQAWFGIGLAF\*

>SPSA8\_v1\_250017|ID:41145649| Iron-sulfur cluster-binding protein [Spirochaetes Bin 1 SA-8]  
MSIAAFDVSIERCSAYQKDSVERVIESAAEKAGFPSILGKTILVKPNILNASTPEKAVTT  
HPVFLAAVLQFLRKNAGRIIVGDS PGFQPGSFAGKAAGLHQVVLD AKA EWDEFKQGS LH  
QAPEGKLVKSFVLADVLGTCDLVVNLPK LKTHRLMNYTGAMKNL FGLIPGLAKSAMHMR Y  
PDKEQFGTMLVDLALSVP TFTFMDAIVAMEGEGPGNGTPYPLGLVLASAS MPLIDW TAA  
SIIGYKPEKIPYLADAMRRIGRNPEKPEYSYGPESVTA VRAENFKLLPYETAHPSALKAL  
PGFLQKLAVSATMRRPIFHEKKCIGCSACVKICPGKALVDRKASGINKILIDDAACITC  
FCHEVCPVNAISAGKVFRRSRDRKLP\*

>SPSA8\_v1\_250018|ID:41145650| protein of unknown function [Spirochaetes Bin 1 SA-8]  
MSQFNLHEFLDFGSPDDYERLDFPAPQKH DGRLLADPVILREL ANRAFTEIAYRYPRGHL  
EELSKILKDNTAKEAEKFVAASLLRNA AIAAEGFYPMCQDTGTALY GWRGNLGGGTAD  
EAAWLAEGASEX

>SPSA8\_v1\_260001|ID:41145651| Beta-lactamase domain protein (fragment) [Spirochaetes Bin 1 SA-8]  
MKIHPITDKIFALHADIKSDDLFEGIWPIPYGVSLNSYLVKSEKIALIDLVRDWVGAPGE  
LAGQLASIGVGLDDIDYLILNHLEPDHTGWLNEFRAIXX

>SPSA8\_v1\_260002|ID:41145652| conserved exported protein of unknown function [Spirochaetes Bin 1 SA-8]  
MNSKVSSRFGRFFMLTVGALLLLSGIAFAQEAGSDVNLDELFGGDVVTVEQDSPAPSQNA  
VTSSLKSDKVRIGGSFSGSLGAAATWNNP WDG SFDL FNADKTEPSAQAKATVFFDARPAE  
DFR VYGS LNTSWPYAVADSSSDKSIIPNVS VFELFSDFSWNDQVFFRFGKSTVKWGAGYF  
WSPADVINLEPINIFDPTSQRAGPLNLKIHVPVLTQNNFYFYTILDEKNLAFSTTALAG  
KAEFLLGKYELGIGGYRCDVAERGMLTLTGPLGNDFIFSEAMISRGS AKTFVTDIAVLP  
PFTVSTSKVEDHRSSFYASASAGFMYSNQNSNVSAIGQYYYNGEGYSDSTRD LIGKATT  
VIAALGGADTVPGKAMAQALSGLLFGSGRHYAALSLSKSKFLSDDFSVSILALANLSDFS  
GIIRPQASWKIIDRLSVTASPMFIFGGENTEYASLFGGDILAFSVSVSIGSGSF\*

>SPSA8\_v1\_260003|ID:41145653| conserved protein of unknown function [Spirochaetes Bin 1 SA-8]  
MLPEANKGQGYLREDDNVWFYDPSSRKFSHSSVKENLQNT EAKNSDFTAGSLADDYEITA  
ITEGTIGKYPVWIFDLKAKTNEVA YDRVLLSIRKDRIMVLKREDYSLN GRLMRTTLYPKY  
VEVAGKLLPSQTLIIDEINKGEKSQITMAEQSVEKLPDKVFTKAFLEQVNR\*

>SPSA8\_v1\_260004|ID:41145654| exported protein of unknown function [Spirochaetes Bin 1 SA-8]  
MKKKSISPV LILVIMLAVLAPAALSAQTLSMTEAKKILAQLDDLG NFP GKDF TALFTIVS  
EKPGEKQSVTQVRVFR\*

>SPSA8\_v1\_260005|ID:41145655| putative ABC transporter, permease protein [Spirochaetes Bin 1 SA-8]  
MNRIVPKIALRNLRSRQKRSILLGGAIAFGIMIVTLINGFAGAFITNVSENFAYLMAGHV  
FVQGGQEK TASGKRISVIRDDALIFNAVENAGIKYKTATKASEVMATIVFEGKSIRQNL TG  
LEMEKSAFLRDRMLKQGSWEDTMKPDALIISEKIAKKNVLP GD RITA QFQT V T G Q N N V



ADFTVAGISADVSIIGSVMA YVNLA YLNA AIGIGPSEYMSLGFMLDNLKDAASFSDRLFT  
SMKGMGLQLFDRTKQAENGSSPTPFMAMLRSONQETWSGTKYRVYTIDDQLAQAKQIVVAL  
DSASLVILIVLFAIVMIGITNTFRMV MYERIREIGTMRAVGVQRSEIRSLFLYEAFLLAL  
GGALSGILAAFIVMNLSSLINFGMNSPAFLILKNGHLSFFLPLRALANITIIAVLTLFA  
AYFPARAAAKMEPAVALRTLK\*

>SPSA8\_v1\_260006|ID:41145656| conserved membrane protein of unknown function [Spirochaetes Bin 1 SA-8]  
MPVTLRMALRNIFEHKAKSLIIGILLALGAFILVLGNSFIDASQAGIKSTFTDNYTGDVDF  
ISGLSEDGSVSLFGVTSPGGLSPTPVIPDYDKVLAIVKASPLVDKATGMATGFALVTKGE  
EADIRSETPEDTANTDPGARFLFLFGVDARDYWSVFNVDLTAGSLLEPGQTGVVLYDKH  
MDKIAKWLGHPLKIGDSIVIQGISSSGFKIRSVPIVGTYHQKGEGA APEQMAFIDIDTLR  
VMAGMTVGAGDDQNL TASSTAMLSIEDTDSLFGDDLDAAPSESGFNEKKLIAQLADTTA  
RERANTADSGSWQFIXIKTKRASDAKVL TANLNSAFQKEGMKVEAGDWQKAAGPYGQSV  
VVRIVFVIAIVILSIVAVIIIMNTFVISVIERTGEIGTMRAIGA EKSFIRKLF AVEAAVL  
SLVFSSLGALLALGAVQILRAMKIVAGNPFVFLFGGKYLSPFVTLNFLTGVAMLA VG  
YLAHLYPVSVALKIQPVRAMQNE\*

>SPSA8\_v1\_260007|ID:41145657| conserved protein of unknown function [Spirochaetes Bin 1 SA-8]  
MGIIEVQDVKKIYPLGKVEVPAVKGVTFSEKGFISIAGPSGSGKTTILNMIGLIDKPT  
SGEVIIDGKKTSLSDKELTRFRHEVLGFIFQSFNLIPLVNLVWENIEFPLLLGQTRITKA  
EKNDWIDWLIAEVGLTEWKTHKPNELSGGQRQRVAIARALVTKPQILADEPTANLDSAT  
GEQIIELMKKINRELLTTFIFSTHDAKIVGIADHIIRLDGLVTENRRRGEDINGSSQIV  
EE\*

>SPSA8\_v1\_260008|ID:41145658| putative enzyme [Spirochaetes Bin 1 SA-8]  
MADFSPEFSKNSMNMKKS VIRELLKLTQQPEIISFAGGLPAPETFPVEDLRVAADAVFKK  
HAAMALQYGTTEGDKSLKAALIKYEEANGVKIGENLLITSASQQALDMIPKIFLDPGDY  
VLAGRPTYIGAIQAIQSYQGK VIGIPFSMDNDGFDMEVELEKRYRAVDTGSKIKYIYVIP  
DFQNPSGICWSLEKRKALLEFAYEKKLFIVEDAPYREIRFMGEPIPSIYQLDQQGAKAGN  
VINLKTFSKILAPGTRIGWIMAREDI IQKFVVAKQAMDLC TSPFTQLWLAEYLSSGKLN  
VIKHTCDIYRAKRNMVEMLEK YMPKRFDLRWTKPEGGLFLWISLPHYIDTDKMIFKAVE  
KKVAYVVGSAFYFDEPEHNAMRINFSYSSLEQIEEGVKRLAEVIKEEIEAHESGPRGQTA  
PEI\*

>SPSA8\_v1\_260009|ID:41145659|ychF| putative GTP-binding protein [Spirochaetes Bin 1 SA-8]  
MALNCGIVGLPNVGKSTIFSAL TSAKAEAA NYPFCTIDPNFGIVAVDPRLDKL VEMFKP  
KRRVPAVVEFVDIAGLVKGASQGEGLGNQFLSHIREVGVIAHVVRFCFDDPDIHVANRIS  
PKDDIEVIHTELALADLETLDKRLEKLQKQLKVQDPAVKKETEREIAVLTKIRPALESGK  
PARTVPLDDDEKAAVQSSFLITMKKEIFVCNVXXSGLAGNXYVEEXKQXAAAIGSEAVSI  
CGKFEAELADLENAEREEFLQIGLEESGLSSLIHAA YRLLGLRTFFTAGEDCRAWTI  
KAGFKAPQAAGVIHTDFERGFIAEVYHYDDLKLGSEHAVRQAGKLRQEGKEYIVQDGD  
VMFFKFNV\*

>SPSA8\_v1\_260010|ID:41145660| conserved protein of unknown function [Spirochaetes Bin 1 SA-8]  
MSCSSNSMSEHTDSDEAMLTGLPPFPDYAEGISPLFLILGSFPRSASLAMKTYAHPRNH  
FWRIVGEIFNMDLEKASLKEKSTFLRMHRIIWD SIAACRRPGSLDNAIQDAVPNDIAGL  
LARFPSIRAVGLNGLQSARVFFTRILPEPAKVPAIGEILTLKITKNRPSSVLMRLPSTS  
PVPTRA YRDGASKIPHWKQFFTIHL\*

>SPSA8\_v1\_260011|ID:41145661|uvrA| ATPase and DNA damage recognition protein of nucleotide excision repair  
excinuclease UvrABC [Spirochaetes Bin 1 SA-8]  
MDKLIK GAREHNLKNIDLELPRNKLIVISGLSGSGKSSLA FDTIFAEGQRRYVESLSAY  
ARQFLGRLDKPDVDYIEGLSPAISIEQK TTHKNPRSTVGTVTEIYDYFRLLFARIGIPHC  
PKCGRVIKEQSV DQILD TILSWPDDTRIQLLAPVVRAMKGEHKKILEDALKQGFTRARID  
GEMVDLEEAPALEKQKKHTIEIIDRIKLN RDARRRIA EAVETSLHIAESIVIVLRDEGD  
GTIKEEFFSQKGACPECGISLPEMEPRLFSFNAPQGACPVCTGLGVKLEFDPDLVIPNKS  
LSFNEGGCIPYNPQSAWNRSRFEALAKHFKFSLDTPFEDLPEKAMAAILHGTDEEIHVRY  
DNRENTGHFEYQTRFP GILEDLKRRYMETTS DGIKQWLEHFMTEKPCSSCDGKRLRSEAL  
AVTIGGKNIHELSSFSVEEAL SFFDSVRLTDVEQQIAKQILKEIRARLSFMKNV GLEYLT  
LERKASTLSGGEAQRIRLATQIGSSLVGVLYILDEPSIGLHQ RDNQRLIDTLTFLRDIGN

TLIVVEHDEQTLRTADYIVDLGPGAGEHGGK VIAAGPPEQIMLSEGSITGRYLAGKLSID  
VPAVRRIGSSNRLVVRGAREHNLKNIDVAIPLGMFVCVTGVS GSGKSTLLSDVLYPAISN  
RVMRTSMTEGLYDSIEXIEFIDKIINIDQSPIGRTPRSNPATYXGVFTAIRELFASLPES  
KARGWKAGRYSFNVKGGRCENCQGDGTLKIEMNFLPDVYITCDVCHGKRFNQDTLDIRYK  
GKNIADVLDMTIEEAAEFFEHIPPIRHKLITLLSVGLGYIKV GQSALTLSGGEAQRVKLA  
FELARRATGKTLYFMDEPTTGLHFADV KQLMDVIHRLVDTGNTVVMIEHNLDVIKQADWI  
IDLGPEGGGRGGSIVAQGRPEDVVQSSSYTGAYLKP YLSV\*

>SPSA8\_v1\_260012|ID:41145662| protein of unknown function [Spirochaetes Bin 1 SA-8]  
MLLAMFAARKRNTALVLLL FVVSLSGILPSRLLWAQESDKGSEYLDLSALERKTLALDI  
AVSSYYELMDLAQRFNLPTEGTSQDLRQRLYGFFKLENPVKPSATALTIESASSFSTFSA  
EQKTSNLIQLSGPVILKISTSDGFLHRISADRILYDSEKNIAEAWGNIEYTREGNGRTDR  
FAGSHLIVDLAQYSGVFLDGSFNLEPSSAQRTLLLHFDRLVKRSENVSALESATLTACN  
ELPLHYYIKA AKVWLFDSGDWALSNAVLYIGVVPVLWLPFFYYPSQEIVFHPVVGARTRA  
GAYFQSTTYLIGEKPVSTAMS VFTALNQAAMGKTEMSGVFLKRTGSTEQSSATAAGTQ  
GSSSIQSSKSLKLMADLYSALGVYAGIAGYFPIAKSSGKLEFAAGIGVSRSLFPQSTGY  
SPFDYAGNYVSVWNQSSFFGAQLPFRYGMTFSYKNTVKNPFSATFSADIPFFSDPYFEQ  
DFLDRNESSNVFSMFGAVQKTISRSTLTDTLQGSLAWTFASSSRAPLLKALSFSRLQSQ  
LISRTRSQPTSGLTAQQRLLSVD PQRDFYYPDEFRLDASMAASGTLFSFKKSKPSGTG  
QGTVTASQGGQPSLPPAQADSEAAVLQNASSPAAGTQKRDFSQFASRLDWSISASGMANN  
KFRSNQWNTPV DIDASSQYFLG YRGNLRFALASSFAENLMSQQLTLNFNAQDQYRPYLY  
DERSSPTSPHPYRLTDYAYRSNSADFANELSFQPLPAGTAFSSTSLQYSLKGTLFSTKYQ  
GLSGSGVDAAPIYATDWFSWTSAYIQSHTLSINIGYAKTGKPSQRLSFSASLPPLDEKYA  
TQYSLQAKQYAFVAQGS LTRNSGTSQLEPSSLNAQLKLG GGTLP SLNSELVWDFVTSAPL  
SLAASASWKTFSGRFSARKAKGYDFSSGTWIPDGT EYFRPYDYSLAFAPIWQTKSKAAIA  
SAPAAVSAISTDEVEDEAEAEAPASETQAPSPQPSA VIGQSVYFSLKP KLSYTNIIIRFT  
ESTLAFSLDASIA TEKGTKLTFSSSSINKSAWRYWPGMFPIT TGLDPNAYARNPITDIYN  
SLAIWDSARLKTTLFKLQ TLSLSQLDHDWTINAGLGMSPVLITPDSGRPYYQLDFSFT  
FAVTWKDVPEIKTQLSYKEGSLANE\*

>SPSA8\_v1\_260013|ID:41145663| PhoH-like protein [Spirochaetes Bin 1 SA-8]  
LNSESIVLENTDLLSEICGVNDYNLSIMGDLLGARVLSRGNELFIDSDDTDIQSLFSSLV  
EALAKSIAGGLPATPDLIIALHAEL TPLGNEHSSALGGAASSPTKNASCDDFLDL CIQIP  
GSFTKVYPRSRGQGLYLKGLATHDLIFSIGPAGTGKTYLAMAWALKEVLTAKRKLILTR  
PIVEAGESLGF LPGDLEQKINPYLRPLYDAMEMILPYETIRKLEESRSIEVAPLAYMRGR  
SLTNCVVILDEAQN TTKEQMKMFLTRLGENTKAIVTGDITQIDLPRKTESGLVHAMQVLE  
NIDEIMISKLDGRDVRSQLVRKIIEAYEHE\*

>SPSA8\_v1\_260014|ID:41145664| putative 7TM receptor with intracellular metal dependent phosphohydrolase [Spirochaetes Bin 1 SA-8]

MNKLIKDSFIFWNILACILLASILLALLGPGANAVRRNFEGIEAGKIADRDIVAGKDVFY  
IDTEATRLRIEAEERLVLPVFQMDEQASLRITRQFQDFRNAFKDLVSDDVSAESSILMLQ  
SKFPGIFSRLLASLLSTPLKSQALVYTEDVLQSLSTGIVLLPSEGLSTYNQDYELRR  
LINNKIESEQRAFSSMITKQDVPEQINREISEKHLSRQLGGIVSGLVQTFAQENVFFDET  
ASKARIKAVRNKVEPVKRAIGRNEILIRK GEMVTPETFARVQAIRSAASRADFGLVFGGL  
GLLVVAAFISVILLGQNVQPGNGDRKIVLMALYSATLFFILILVAARLTTGQLPLESSY  
IIPISLFGIGTAISGQTFGYTYSLILGLVSAPASNLP HLLVFILLSGIFSSFMISISK  
TRLALVRASFFQALFQGLLTLVLLL PYAGKFQLVAGLSFMQALNGFLSGALILAILPVIE  
QGLNLPTRFRLL ELSDVNAPALKELMTQAPGTYSHSLNVANLAEAGAE AIGANALLARVG  
AYYHDIGKIEQPEYFVENQKGVNKHDDINPRLSATVIRSHVKFGVEKAKALGLPKEVVEI  
VAEHHGDSVITWFYEKAKAEDETVRREDFSYPGEP PRSKEAGIVMIADTVEAATR TLK KP  
TVPRLEQQIRQLILDKVQAGQLDNCSLTIKDLESIRHAFTRILAGQFHSRIEYPRQKENG

\*

>SPSA8\_v1\_260015|ID:41145665|ybeY| Endoribonuclease YbeY [Spirochaetes Bin 1 SA-8]  
MNQVLVDFQDIEEPS CIVPVSEFMQKILEFKKISDWEVSILFCSDAFIQNLNKEYRAIDA  
PTDVL SFSMGEWYENEKQKIYRAGDIVISMPALHRNAEEFKVDPDEELKRLLIHGILHLE  
GMDHETNDPSEPMLIRQEAILREFAGSKLL\*

>SPSA8\_v1\_260016|ID:41145666| Hemolysin C [Spirochaetes Bin 1 SA-8]  
MNGIFRIFNRKHPVTEENQQVLAEQEEMKEGIEHLAETTVKEVMVPRTDTVFISHDASR  
QEILGTLVGSRHIPVYRETMDQVVGIIYAKDVLASLVSNNGKIETSALMRKPFVVPETK  
KIDSLLEKFKRKHVHIAVVVDEYGGTSGIVCLEDIIEEIVGEIQDEFDNEKEPIIQTAPN  
TFICDARTRLDDISKELSNLPAEEFESLAGYVFDLFGRIAPQERAETDDAEFTVMEMD  
AHRILSVKIQLKRNNDTTSI\*

>SPSA8\_v1\_260017|ID:41145667|gdhA| glutamate dehydrogenase, NADP-specific [Spirochaetes Bin 1 SA-8]  
MNAYIKQVLDDLRLARYPWESEFLQAAEEVLESIAPLIEAEPKYKAQKILERIVEPERTVM  
FRVPWIDDKGEYHVNRGYRVQFNSAIGPYKGGIRFHPKVTLSTLKLFLGFQIFKNSLTGL  
PMGGGKGGSDFDPNGKSDNEIMRFCQSFMTLFRHIGPDTDVPAGDIGVGGREVGVMFGQ  
YKRLANEFTGVLTKGLTFGGSLVRPEATGFGAVYFAKEMLKLKGQTLEGKTVSVSGFGN  
VAWGACIKASQLGAKVVTISGPDGYVFDPDGVGTKEKWDYLEEMLVIDRNKVENYVKKKF  
KAKFFAGKPPWEQKVDIAMPCAIQNELNGEDAKVLIANGVQTIVEVSNMGCTPEAWKLF  
EKKIPFAPGKAANAGGVATSGLEMSQNSMRLAWSAAEVDRLHEIMTNIHKSCVETAAY  
GFEGNYVIGANIAGFKKVADAMIAQGLV\*

>SPSA8\_v1\_260018|ID:41145668| 3-phosphoshikimate 1-carboxyvinyltransferase (fragment) [Spirochaetes Bin 1 SA-8]  
VHTAGFFYAHFMVYSATIMNTTCLYTSVSGIISAPPSKSSMQRAVACAMLADGISLRNP  
AFCDDARAAMGIAAFGAGAELSNDSVQISGSPLFKNRTTMSENAGSLEVSCGESGLSMR  
MFAPISALLSRPVRLVAHGSLTRRSVMVQALNAMGVSCDSADGLPPLTVKGPLLPGIY  
HIDAGASSQFLTGLLMALPLLAGDSVLRVSNPVSTGYLDLTVATMGLFSVKVEHINNSR  
FEIPGGQRYVPATMSVEGDWSGA AFLLAALGAKERPLRIENX

>SPSA8\_v1\_270001|ID:41145669| Fe-S cluster domain protein (fragment) [Spirochaetes Bin 1 SA-8]  
MFFISPTAKVTAIRMPLGYERSLVDAVFSFQDIFPALKKALSRPSETPSRFAPLQERIA  
RMRRGHGMDWARSDGEIDGLGIEQAVSVDGIQNVIALLEEIDNGKFSSVPYIEALACPGG  
CVGGPMAVANPHVARAAMKHIAAAEKTAAAQSGQSEQAQAGFGWERELQPKPVFLDRD  
MLKALQLAEQMELITSQLPGLDCGACGSPDCRALAEDIVKGKAVIEDCLVMMRKKTAFLN  
TNE\*

>SPSA8\_v1\_270002|ID:41145670| conserved protein of unknown function [Spirochaetes Bin 1 SA-8]  
LNKKDFPRVHFYDQDFVEIYDRTWAWVSDCWTTQGGPDSGIDKLFYIPQKPVLDIMEQV  
FSSFFMVYSNRIFTASNGLDALYALQEPDGAIRAAYSVETGKPILODDNPEGVMLPLFAW  
AEFNLYHKTANKKRKVDVMPALKKHYKWLESKFKSANGLYATPVASTGMKNSPRPNAMYL  
VDFNAAMAMNALYISALGDILNDKEISFQFKRDYFSLKTRINSKMWNPEEGFYDLDAQE  
QQVKTGTIGTYWLLLAEIPNEERAekliHKLKDPAYFGTENPFPTLSADHPLYDRKNGY  
CGSVVPAFTFMVIKGLEKYNFYEFARDCAIRHL YFVLDTMHQNSEHREGGHQRDHKPIVW  
SAYQPQSEGKAHWDAVPDWPYPHYLPFNGLTTVTLMIENIVGLYISLPRKTVDWIIPNLE  
IMGIENLSLKRNMITILSSKSGRGWEIHMESEKLYYFTINVINKKKKTLPIPSGKCSMLI  
DKI\*

>SPSA8\_v1\_270003|ID:41145671| protein of unknown function [Spirochaetes Bin 1 SA-8]  
MDAFEAEERQRALDNLTSAYALGKITLEEYEV RADRIQKALSIDGITSQVSDLPVPASETS  
SRSTAPLSSRRERMPELSQPGSYLVERRQGSPEFLPCIMGDRKMVGDWLNSDTATSITL  
MGSTTLDLTETAIPPGRLLKIEAIAVMGEIKILVPRGLPVRMSAFPFGGEAHIQKGVQRV  
DRSLPYVEISGLALMGSI VVKS\*

>SPSA8\_v1\_270004|ID:41145672| conserved protein of unknown function [Spirochaetes Bin 1 SA-8]  
MLY AISLGG SIVAPPEGPD TGFAAFAERIAAWLAQHPEHRLIMVIGGGGPARTYQNA YK  
KFLEIT AATLPTLQPGASLDTALDWIGIAATRLNAQLVKS VFGPLCADAVVTDPSADIAF  
SGRILVAAGWKPGFSTDFDAVWLAERFGASMVLNLSNIAKVYTADPRKDPAAAPIDAISW  
PEYRAMVGSTWTPGANLPFDPIASEKA EKAGIKVVCASGKDLNLFKILDGKAFIGTMIG  
\*

>SPSA8\_v1\_270005|ID:41145673| putative HAD hydrolase, IA, variant 1 family protein [Spirochaetes Bin 1 SA-8]  
MKCGLAASEEPLDTTAP EISTVIFDCGRVITMDQDSACAQAMADFFSPSADLAEFIDTYT  
RERPAYDQGLIDAFAYWNNVGRHYGKTVSAEDVSKLIRWDMRSWFTINPETVHHIQELKR  
RDFRLMILSNMNEEGKAEMFGASRYCGETDWISLFDILLSCDLFQLK PQEEIYRTCVAR  
AGTEAEACL FIDDSPANIQAARECGLHGIVFNHASQLRSTLRDSYRLN\*

>SPSA8\_v1\_270006|ID:41145674| protein of unknown function [Spirochaetes Bin 1 SA-8]  
MPIQTNTMVNAIRRNRAGLRYNTGLRFALILFLAVFLVFTTSCTTPLQWGTIPPSADDLA  
VQAWLSDISLLKNEMLKHPKLVSDQATARQTFIHEIEALQQTLETADNLIGSPADTAIPGI  
QRALAAVGDGHTRINASPSDLYPVAMRFFLDSRHADEGADAPMEHWDLRIAANQPQTEY  
LGLIVTRIGPYATQEAIQQIAPYLSIESALGKEANPYLYEHAVRSEIMESFMNPLYMRRLL  
GMANQNGLTLTVLREGVEEELSVPLTSRQDNHWVRVLDIPSIPFTRSHPEARWWYDYIP  
GHPSSIYLRYYDDCDQAAWPLLQEVALLPDKGSQQTSPDHLIVDLRFNSGGNSMPGYRFA  
QALAKKQISAEQGGVILLISGTTFFSSAMQNAADIKACGGKKNKNTGTAILIGEPLTEPLR  
HYGEVKRFSLPASGLIIGRSSRLWTYDTSTGIFPPRGVLEPSAGHLVWPDFDDYRNGIDT  
VFEHALELIP\*

>SPSA8\_v1\_270007|ID:41145675| Peptidase M20 [Spirochaetes Bin 1 SA-8]  
MSKTIDFNDVRSLSISLTRNASITDTSGEKAFPAFLLDIISQIPYFRDHPEDLRLHEIPG  
DPKERSNLTALVRGKGKDCILITGHYDVVQTSMYGSLEPWAFDPETLSVKILEQLADVSS  
KDNPLYQLKEDLQSGEFIPGRGILDMKSGLAAGISVLARFAAPYERIGNILFLAVADEEG  
KSHGMKAARAMLPEFLKQNGLKPAAI FNLDSAVDKENGEAGRAVFTGSGVTKLPPFVYFLG  
QCTHAGAPFDGINAVLAASEFAREIECNPDAMQERQAAPGEEAPPPTILYFRESRAHYDV  
TTPSSVFCAINLLSHQRSPEDIMENIRRITQSAMNKAISLLRERASTLSRRISEHFKLPA  
AQPAVIEFSEFSQRAERTSPGIVQTIRNLAKEKEHPDDQVLQITIFILNHLLPYTAIEGPA  
VIGFAPPYYARAELDSERYQNFSVLLRETLASYSLETGTAVRVRPYFPGISDMSFLAPAD  
TREQRSYLASQSPVIDSTLKEGEHGTIGCPVINIGPWGRDYHQMGERVHAVYAFKQLPEI  
IWRLAQGILD\*

>SPSA8\_v1\_270008|ID:41145676| AMP-dependent synthetase and ligase [Spirochaetes Bin 1 SA-8]  
MKRTVLRMLAEASRNWADDPYALRKTDKGYEATTFQAQVVKARQFGAWLVKEGFGKGTAF  
AILGEGSPEWICGEYGIMSAGCVSIPLSIKLLSEELPFRLNHSESKGILTTHNQLEKVL  
ALDAVENKALRIIYLDSDVEWAASMLEKHGVSKNLLTGFAQALEAGEKALADKSSEIAEK  
LDRIFEEAEEDDVVTISYTSGTTGNPKGIMLTHLNYWANCHDAVDLFDNPIHFRTLLVLP  
VDHSFAHTVGLYTALICGIALYFVDSRGGGIATLRNIPINLKESNPIFLTVPALSGNFM  
KKIISGIEEKGGLEIKFKSGIAAGIAWNGNGCNTPPFMTRAKAFFPYFLAKALIFNKIK  
KMVFGDSIRFCVGGGALLDIKQQEFFAAGVVPVFGQYGLTEAAPIISSNVPKKYKFGTSG  
VVAPSVSCKIMRQDGTEAAVGETGEITIVGENVMKGYKNEEATAQALRGGRLWTGDLGY  
MDKDGFLVVVGREKALLIAEDGEKYSPEEIEEAVTMSTDVIDQIMVWCDHKKYSCALVSL  
DTAKVERLMKAKGISDATKLCAALQEEFYRFKTDPKAKKVQNAWIPAVFQIVPAAFNEKD  
GTINSTMKLVRYRVAQVYKDLLDYSYTKESVTTNARNIQTLKELFKLK\*

>SPSA8\_v1\_270009|ID:41145677| conserved protein of unknown function [Spirochaetes Bin 1 SA-8]  
MTKNMGSIDRIIRLSAAIIALLIGTQVLTGTAAILGILAVVFLVTSAVSFCPLYVPPFK  
FSTKKN\*

>SPSA8\_v1\_270010|ID:41145678| exported protein of unknown function [Spirochaetes Bin 1 SA-8]  
MKIRNAIAAAAILLSLVNFSANLYAQGNPAAVSGLVFVEGGTFRMGVENSKDPLAAH  
DVTVSSFYICDHEITVGEFRKYMQEFGIADFDNSGQVYRNGKWVTDENANWENPGFP  
QTDDHPVTMVSWYDTLFCNYLSIMEGLEPVYDILKTGEVQANLNKNGYRLPTEAEWEYA  
ARGGVRSKGNKYIGSINPEAVA WLEHNSGNTTHPVKKKMPNELGLYDMGGNVYEWCHDWF  
GPYKPEPVKDPVGPESGENKVLRRGWSASKPAETLPTSRIEGGYFAGSDVGFRRVVRPSG  
PGTSKPIIAKPTTIVSSTTTTTVAKKLSLKGVMQMTLVEGGTFIMGTESGESNEKPAH  
TVTSTFLIGTYEVTVAQFAKFIEVTGYVTEAEKGGGWIRENGQWIQKSDANWFPYIK  
QTAQHPVVHICVEDAMQFCNALSEAEGLPVYRITASTISVDLSNNGYRLPTEAEWEFAA  
RGGLKSKGCQYAGASDLSEVGSWHSANSGGVTHPVGSKKPNELGIYDLSGNVWEWCQDRYS  
PYTADSQRDPLGWSEENKVKVLRGGAWTTGPAYCRVYKRLSEKPDVTDFTFGFRVARRP\*

>SPSA8\_v1\_270011|ID:41145679| Polygalacturonase [Spirochaetes Bin 1 SA-8]  
MSTKISLDDFGALSADCSQAFQAALRELDKLGGGTLQVPRGTYTTGPLELKSNTHL  
LSSGAVIRFIPDPSRYPPVETRWEGLVCNAMHPLIYARDSSNISLSGQGTIDGSLWWWK  
TYREKRARNQRSPELAIELELANLNGSTELQPSGGGREGMQLRPPLIQFYRCSKILMEG  
ITFRNSPFWTIHPVFSNIEIRGITIINPSDAPNTDGDIDSDVTLHSTIDVGDDCL  
ALKAGSGHQGLAENKPTRNVIIQGCTFLNGHGGVVIGSETAGGVENVEVLNCQFDGTDRG  
IRIKSRRGRGGIVQNLDFRNLLMRETLCPILTINLYNCGASAEERPLLFSFPEPLSSLT

PRIRNVKISNLTALDCRSSAGFIAGLPESPIENLLIENFHASLSQEKLKKVSNSEMYEGL  
PEIESRQVIRIRNASCIHGLQVEGTQDHEKIIEEQSRSISGLGN\*  
>SPSA8\_v1\_270012|ID:41145680| protein of unknown function [Spirochaetes Bin 1 SA-8]  
MEDHEKDGKAIKQTGREGVANERIHHRDKCRRVAFMLASIHTGAAKKIWAELFKVSHRDRL  
ILYIFPGGRLKAPDSHESLRNGIFNFISQNNVDGAVSWASTLSGFVSEKEVEQFHYSVIN  
VPLVTFGLKFENAPCVQIDAYSGMIKLISHLAEKHNKKKIAFIGGPNVHSSAEARYHAYR  
DALKNLGLTFDPRLTVLNNSWDEGQDAAIELLDNRKLIPGKDFDALCAASDLLLFSVAVQV  
FHGRGFAIPKDIAIGGFNDSEESYLLSPTFTTVNMPFARQASHAFKSIKQILSGHIMGKD  
VLLGTKLIIRQSCGCHIESVRLIERAARKTRISKAASMKAATAFFHDELAHRLAAIFSSS  
MHVDTGKAEYMAKELIEASAALFYKEKNDEFLLAVLDRMLNEAILEGKEISIFQDILTMFH  
SYFRKSMYRGLDEMPEVVIHQARVLVSDAEKRMSNYQAWKERQIEHVLNSFNHDLCA  
VDVASLVQSVRRWLNPIGIHACHLVMYYSEKESYCGGYDKDRALIPDSESGEYLSRYHF  
PANRILPDHLAPSLPGVHVVLPLVDRSASIGYAVMETEYIDPSLLEEIRAQLSSALRGVL  
LFREATSLRIRAEKAEEKITELLARVSSELQKPAASIAEISMELMSQSEVGHESITAQES  
LRKIHALLAQQRVYTLLELSRAQAEDLPVHASFFSLKDLFSDFIESCMEFSQAALDY  
APLSCRMPVLFGRQVLAARILVPALTVNFNAEKIGISCSILPYGVSIDIIASVSSVP  
NENKIAQIAAAVDREKWEKISAFSRSASGLELELAQRLMYFNHGKIEFFNHKSEIGFHLK  
LPYPAAMGRYFETEHEFTPQEILVNGDPVFFSKSGFEDTCPQSRLEMEKLVSPIWKQNI  
PRLCYAELSSLTAGQAQSLMLLESEPPGAWRFYFSCGENSNHDSLNGFINGQYKDLHQF  
LEMKLRQGTALLMVARDTALEDNLKQALSDSGYAVHVCHDPETAPPLYEKCSPELLIS  
VGQNSSFLYELNTVFRAVSGVPTLCLAPLFTQQFEKAIISRPNTCVLNLGDLFEPAIRA  
KIKELASNKNALGAAAGRLVMKSIFYINHNFRNHLRWKLCGEVNASSEDYLSRIFHQHIG  
IGLWDYLNRLRISYAITQLNTTNDTIYEIAERCGYQDQAYFCRVFRKLSGMAPTAIRKSA  
VSNVSKVQ\*

>SPSA8\_v1\_270013|ID:41145681|lpIB| Protein LplB [Spirochaetes Bin 1 SA-8]  
MTATIKGLSDKSGMILRRVPAQGRWFRRFAPVYLLASVSLAYFFIFKYIPIWNAQIAFR  
DFQALEGVWVWSPWTGLANFREFVSSYFTELLRNTVFYSIGKMLFSIPAAIFLALAIYEC  
RILVLRKSVQTLAYLPHFLSWVIMYAILLSLSPSNGVVNDVIKLLGGQPVSFMTDTNAF  
PWIVILSDTWKEMGWSAIFLAALMGIDPTLFEAAMVEGASAWQRVRFITLPSISPVIVI  
VFLLRIGTILDAGFNQIFMLYSLPVYSVADIIDTWIYRQGILEFRFGLATAVGLFKGVFG  
MILLISNRLIKKRTGSGLY\*

>SPSA8\_v1\_270014|ID:41145682|lpIC| Protein LplC [Spirochaetes Bin 1 SA-8]  
MAGTVRLSKSDKGFYLFINISLVCTLCILIPWSTITLSFRPNDFIGTALEGMFLPPWQ  
WSTAA YRSLLGHRSFLLSAVNSFKIFFEGVAAALFLTVPPLAYLLSVKNLPGRGFLYIFVI  
IPYLFNPGLVPNYLLVTRLGLVDKLA AVFLPGA VSVYNTLIMKSFESLPEDLKESARID  
GASELAILIKIILPLSKPILMTIGLYYG VHFVNDFFNAML YINSSKLQPLPILLRNILIA  
SGMNEYVEASAFGEAPIQAIKAASVFLAAIPMLVA YPFIQKYFVKGTMLGSMKG\*

>SPSA8\_v1\_270015|ID:41145683| Extracellular solute-binding protein family 1 [Spirochaetes Bin 1 SA-8]  
MKKTL SAML MIGMLVMAVGMVQAQATKPV TIELWYGAAITEAGPPPDDWVYKIVRDKLN  
IDLKITALPSSES DQTTKILAAAAANQLPDIFMVQRTPWLKLIQQGLLADVDDMYPLMPH  
RAKNYFNADSQEFTTVK GKSFGALFP GALQKNEGLVIRKDWLDRLGLKMPGTIDELYDVC  
YAFTFKDPDGNGKNDTYGYGAFVELFDQEQLGRRFPIMGAFGVAGTWNMTKDNFGLNV  
KKPEYFSALS FVRKMVENKVIDPDWPVYKDDFRAAWKQGKFGIMREQFAALAAAANYAP  
FDKNFPNGEWWPLAPPKGPNGKNATGIVDANYRIYAVSAKAAKAGKKEAIARLLDWMSTE  
EGYRLIGWGV EGVNYS LDENGNITDKNVPADTKFSSPKGQTVTQLRNMVFNYSMDMELISR  
YPYFTTINGRKLGLPMLYPKFQSYVWVNTGAGTILPPSNAGDLLRYINQGVQEFALGKK  
PLTKENWDAFIAQMDKLGAGAW EKSAKAQMEEDGYLK\*

>SPSA8\_v1\_270016|ID:41145684| Candidate d-4,5-unsaturated beta-glycuronidase Glycoside hydrolase family 105 [Spirochaetes Bin 1 SA-8]  
MEKEGLLHLLLEGVLNTAANSIELQLREQLRWNYETGFLLEAMYSAAPIAENEKIVQLVR  
QSIDSLVDAHGYIAGYRREEFNLDQINPGKLLFRIWKDSKDSKHEIALRALAAQLEYHPR  
THCGSFWHKKIYPWQIWL DGLYMF GPWYARYSIEFGKPELLEDLHIQIVNIREHLKDQNT  
SLYYHG WDES RQQSWANPATGCSSCFWGRALGWLAMALVDIWEIAHRMIAWENELTQMIC  
DLAASIFAYQDSSGLWYQVVDKKGLDGN YFEASASAMFAYFFAKGIRLGLLPNAPYCAAS

GKAMDGLAGKLTHLDKEGGVHLSGICMVAGLGGNPNYRDGSKFYCAEPVVVDDFKGLAAL  
LFAIAESVKIIQ\*

>SPSA8\_v1\_270017|ID:41145685| conserved protein of unknown function [Spirochaetes Bin 1 SA-8]  
MADSLASAGFSLEVAGRAFLMDSYIYGFEQRRSMTSGGEEDQRKNAETFSNLATGCY  
PCLSRMVELSMETGYDEKADFEFGLNLILDGLERLLLSEKKSDA\*

>SPSA8\_v1\_270018|ID:41145686| protein of unknown function [Spirochaetes Bin 1 SA-8]  
MSEKARPATSSEKPAEARES AIRRRKEEKHEMKTFFQKVGGISAIGAAATYLFAMGMAATV  
LNPMMVSTLSIQDYMSFLMSNRILVFX

>SPSA8\_v1\_280001|ID:41145687| protein of unknown function [Spirochaetes Bin 1 SA-8]  
LKSPRAIQKVPPELIHFQKRGISGMGPMAEFSKGRKNSDIPHGFRKNSILRISAAEFILVT  
CAILVILTGLGIYASSQYAQLAAQTEKLLASIASQKSDKIESFFKLFLVGAQKNSQNTF  
SSFVGVNIARGDNNKEPLERAAA YLNAVEESYHYSASXX

>SPSA8\_v1\_280002|ID:41145688| tkt| Transketolase [Spirochaetes Bin 1 SA-8]  
MDIHSLEKIALSVRSLTIDAIQKANSRHPGLPMGAAELAA YLYGVEMKYDPADPSWLNRD  
RFVLSAGHGSMLLYSILHMAGFPVSLDDIKSFRQIGSKCAGHPEYGVTPGVETTTGPLGQ  
GIANAVGMAIAERMLAAHFNTPD AEIIDNYTYTLVGDGCLMEGVASEACSLAGHLGLGKL  
IAYYDSNSISIDGSTSISFTEDVSSRFEAYGWQVLHGDMYDFEGLARLTAMAKAEKHKPS  
LIVLKSIIKGGSPGKQGTSGVHGAPLGE EEA AKT KAALGIPQDVFPFYVAPEAYEYFAHHR  
KELSARKADWQKIYEAWGKAHPELSEELSAWFFNRPMSEPDLP SFAQGEKIATRNASGKC  
ITAVAKAWPNFVGG SADLTSPNVTQLPPAPDGSSQVFSKTNP KGRYIHFGVREHGMAAIA  
NGMALYGGLRPFAATFLVFADYLRPALRLAALMKLPVIYVLT HDSIYIGEDGPTHQPVET  
LASLRAIPNVS VVRPADA EETAVAWRMAMEKTDGPTVLVLTRQNL PVFAKDDPEWPTYMA  
LGAYVAKNTATPPDATILATGSEVQLAWQACAFVAEKRP ELQIRIVSVTDMRAFANAPAP  
VKEAILSPGATVFAVEAGVAQGWERFARPDRIFSIERFGESGPGDKVAEHLGFTAKKFAQ  
LLLAHL\*

>SPSA8\_v1\_280003|ID:41145689| uvrC| UvrABC system protein C [Spirochaetes Bin 1 SA-8]  
MKDDERKAPRQLSPLAVKNAEFRALARQAPEAPGVYIMRDENNTIYVGKAKILRNRLS  
YFSGKKDIKTRHLVERVAHIEWVLGSEYDALIMENNF I KEHNPRYNINLKD GKTYPSIR  
ITAEFFPRVFRTRRIINDGSEYFGPFPSAEVIDTYLELIKRLFP LRRCTVMKKRESPCMY  
YHIGRCPGPCAGRISHEAYMERVREVRKLLMGETD SLLADLRRKMEEA ASTFKFEEAAQA  
RDAIKAVEQFAGRTSVQDFDPEARDYLA WHSDGDLISLVVFQMREGRLRGRDSFIAPLYS  
SEEEAIETFMMSYYSQERKPPARLYLKS KIPVRPLKRYFKAQYHVTPEFLIPDSSLHSAS  
MQMAVQNAKEELIRRRREIGDMAALAE LKSILDLETLPVRIEGFDIAHLAGKFTVASLVS  
FHNGIPDKKNYRYFKIKSLGGAIDDFASIREA VARRYTRLINEEAELPDLILIDGGAGQV  
SAAREILDELGLDCGLAGLAKKNEEVYLPDRIGPIVLPK DSPALRVLVAVRDETHRFATG  
LSKKLRTENLKFTVLEAVPGIGEKKARKLLKIFGSLKEIAMADVERIAGEAGISRETALM  
VKEKAGGSYGL\*

>SPSA8\_v1\_280004|ID:41145690| MutT/NUDIX family protein (modular protein) [Spirochaetes Bin 1 SA-8]  
MGSSTKKNRNSDNASILQE QNERAAKTLLHLGGIREAAA AFRFCPACASPKLYSVRDRMW  
VCPDCGF EYFHNVATAAGIIIEVNGSIVVLKRAKEPRKGSYALPGGFVESGERAEDAALR  
ECREEIGWAPEKIEFLASYPNIYKYHNIPYATCDLYFSAKVPSFNSAELDIDPEETSEVL  
LLSADTIPWDMIAFESAQRALRKYLLSR SIGLPPRSM EWEALE\*

>SPSA8\_v1\_280005|ID:41145691| pyk| Pyruvate kinase [Spirochaetes Bin 1 SA-8]  
MDKRTKIVATTGPVSENPETIQALVEAGVDV FRLNFSHKSHDEADRAIAMIH D VRKKLRK  
PVAIMADIKGPALRLYGYSEKIQIARGQELSIQSHDPIGIESSKSDEPGEVFTNLPNIDR  
ICAIGQKIILMDGYFTGHVVGRGKDSVRVKIENEGELRPKAHLTIPGADYPIPFLTEKDI  
ADINWAVSRNIEFIALSFVRCATDIEEV RRLVQRTAVSMSKHTHIKLIAKIESAKGLANI  
DEIVQAADGIMVARGDMGVEMPIENVPIAQKSIIRKGYLA AKPVITATQML ESMIENPMP  
TRAEVSDVANACFDSTSAVMLSGETAMGKYPVQVVSVMRSIINTVEKQFDYLD FHHDVPP  
EVQNGDIPAIMSYNAVSVAYRCNAKALIVLTETGHAARLLSRLRPRMPIY AFLTNEGLYH  
QMALNWGVTPFLHSGKGR L DAVVDEAITCKKGNLLAAGDKVVIVAGLPLAQQGSTNMI  
RVETIE\*

>SPSA8\_v1\_280006|ID:41145692| ribA| GTP cyclohydrolase II [Spirochaetes Bin 1 SA-8]  
MIIPSVEQVIRE DVEFLRHCPHADNCAACSEEV CVMVASVADFPTEYGHFTIIGFVNNKD

GKDHIILKGEIGDGEDMLLRIHSACLTGDALGSMRCDGCPQLHHALEIIEKAGRGAVLY  
HQAEGRGIGLVNKLRAYALQDAGYDITYDANLALGFKADERDYAIPAAMLKKGIGIKSVRLM  
TNNPEKVAELEKHGIVVKERVQHELPAHEHDRAYLETKKERFGHFLDLDH\*

>SPSA8\_v1\_280007|ID:41145693| conserved protein of unknown function [Spirochaetes Bin 1 SA-8]  
MNFLPACLTDLTKAGLKPGLDVFVVTGDAYVDHASFGVALLARFLESRGYKAGILARPD  
PDDVEAFRQLGKPRALFLVTAGAVDSMVSNYTANRKLSEDEYAPGKARELCQRADGTIG  
PGIKNRSNARPDRATIVYTGMCRQAFKGVVPPVIGGLEASLRRLAHYDFWSDSVRKSILLD  
SKADILVYGMGELQLEEILKRLTEGSALDGIPGTVRAVHVGAMPEHELKQAYPEALILPG  
YSAISGADPVSQRHFAESFAAQYRNTDPFTAKPLLERYGDRLVIQEPPIRLLERGELDAL  
YALPFTRQWHPMYQVFGGVPALAEVKFSLSSRGCYGACSFCAITMHQGRVSSRSAEAI  
VREAQELAAPDFKGNHVDVGGPTANFRKPACEKMAKKGACVDRLCLAPKPKCNLSADHR  
EYVEILRKLALPGVKKVFRSGVRFDYAMLDPSEDFLKELEVEHHISGQLKVAPEHVSEK  
VLQLMGKPLSSFEAFKKKYEALNQLGKKQYLIPYFISAHPGSGLAEALELALYLKKTG  
FVPDQVQDFYPTPGLSTAMWWCGMNPLDGEVYVAKGAHERSLQRALLQFNKPQNREL  
KEALQMLGRTDLIGNRPGCLIR\*

>SPSA8\_v1\_280008|ID:41145694| conserved protein of unknown function [Spirochaetes Bin 1 SA-8]  
MSISLIVLSISALILVMAGVAVGVKLGKVIASSKAESRLDLERSDAVKRSRAVIGGQVL  
EQVAPYLPDFPCHPQDVRFLGKPVDFVAFSGSNENDIDEIVFIEVKSGDSALSAAERSIR  
QAIIDGRVRWVEYRIP\*

>SPSA8\_v1\_280009|ID:41145695| conserved membrane protein of unknown function [Spirochaetes Bin 1 SA-8]  
MNSRLLKLISLYIKSTFAISLPAKAEWKKPKVLFKWIGIAALTIADFSFIFIMMNL  
LYDGLKPAGMQSMMLNAATTSVAVLVFVFAFLMALSMFMSMAGIESSFLVLPFSARQLFAA  
KIALVYVSEVILGAFMLLVAMVIYGIKESPPFMFYVNGLITAFALPLLPSAIAYAILVPL  
MNTSKKFRNKNFILYVGGFMGMGFALLFNLYLQRSMANVANPAQLALMTGPDSFISKFGQ  
AWIPSWLAWISMRRSDSLTGFLAVLGNLAIGSAALAAVVFVFGKAYVRSIQDFSETTIRK  
RRLSRKEHDSLFRASPRLLSLIKREFRLMNREPMYLLNGPFVILLMPAILAIVFIAQKDA  
LREISGLLAPMLQGPAGYLVAGFGAFLGSSTSIACTSVSRDAKTIPFIRSLPITPGSYF  
LAKFVHAETFSVLGALFGCLSGLYLLKNGLSDTLMAFALALLFTTAVNIYGLWLDANPR  
LRWDNPIAALKQNPNSIIVILLVMGLVGXLGYLSSILKLSRAGYFLVYGGILLALDIAGA  
VFFGRYAARRMEYLE\*

>SPSA8\_v1\_280010|ID:41145696| conserved protein of unknown function [Spirochaetes Bin 1 SA-8]  
MIELKNISKTYGKSTVKAVDLSL TIPNGVIFGFLGPNAGKTTTIKALSGALRLDEGSV  
AIDGISMADAPLEAKQHIGLVNDNPELNFRLKAHEFLNFIGDVFSVPSDIRKERIDDLAR  
RFSLSVDLTTSIGSMSRGMKQKLSIIASLIHDPENWILDEPMVGLDPQASFELKEIMRER  
TKAGKSVFFSTHVMEVAEKVCDRLAIINKGKIIFAGNLDDLRLKSGQQNSLEELFSLV  
DSTNGVS\*

>SPSA8\_v1\_280011|ID:41145697| CBS domain protein [Spirochaetes Bin 1 SA-8]  
MAAMATVPINTDSGPSVLELLYQLKVRDAMSGSVVTGSADMTLREIQLLMKEHAITGVP  
IVEQGRLGLVLSIGDIIQALDDGHINQLVREGMNTSVISLDEDMPLSFAVTYFERYNYGR  
FPVLGPGGSLVGIITASDIVRRLVAMNEEISKLERRISGQNIDRSDAPTVMEMSFAIA  
PLDFAKAGLASTKFKKALIDRGCPPELARRAAIISYELELNQVIHVSVGGVMRLKVMSDII  
EITAQDEGPGIPDLEKAMQEGYSTANEWIRSLGFGAGMGLPNAKRVAADRFTITSKVGKGT  
TAAAILICSTGRN\*

>SPSA8\_v1\_280012|ID:41145698| conserved protein of unknown function [Spirochaetes Bin 1 SA-8]  
MRIRELIQLLGAEVVQGVYEDVEIAGGYTSDLLSDVMGHAKAKEALITIQHRNTIAVAG  
LVGMPAIVICNSRPIPEEMISAAREENIAILRTDLSQYEVSGRLWSVLSAGKSA\*

>SPSA8\_v1\_280013|ID:41145699| PHP domain protein (modular protein) [Spirochaetes Bin 1 SA-8]  
MTLKADLHNHSCFSPCGDLSMSPSVISRTARKRGLKLVALTDHNGALNTLAFVTSARDG  
ILPLFGLELETLEEVLHLLAVFATPREALEFGQLMFRYLPKMPLDSVRFGEAVVDADEQV  
LGLHEIWFASLDLSLDEAAMMAKQGGALVIPAHVDRPVNSISSQLGFLPDGPFDAVEAI  
RPVGAALSGGLPVITGSDAHFPEHIGRRAFSMELPDSLTSALNLSLEAFYVKSWRFEPEL  
ETLDYKRFIESSVCREYPEEEAHAVFEAVRREGLPGAAAFPFPS\*

>SPSA8\_v1\_280014|ID:41145700| protein of unknown function [Spirochaetes Bin 1 SA-8]  
MKHAVSKSSPSARALDFSPWTKRFLPALLMLAFSSCSGKIEMAVRSDYSARIAVKMDI

PEALSARIRQIGNIGASASLFDVAKIRNEFSARKTLLLVDASSASKDAMTAVLWVPLED  
LARDMSLTPPGMIRFETVSGTQAQGVLRSLITIDKSNAARAFALFPGIDSRLVDSLSP  
ALEEQSITANEYRMNLENVIIIGKKAMPAFDACALEVNL TAPKTIVSATGGTVAGQTFKAK  
ISLFDLLVLEKPIVLA VRWIN\*

>SPSA8\_v1\_280015|ID:41145701| putative Adenylate cyclase [Spirochaetes Bin 1 SA-8]  
MGAMKTRLRRFSEEAYYYSSQLVVLVVIIFLTSGLSMGITSSLIIVFFMIAQIMLLVS  
QGHLPLRFLFSLITPLGYSILRAATSNYAFTETTSLLLWAAAIYIGFFQAVSLSFPQGF  
IKRIAETALSLSGSAVIFFAFYIYLDLRISLQKAYEMGEISLEVFRTSLQIGSFAKGLQTF  
ITSPQHLFALLGIISFDTMLLASRMRSISLHARLDAMLAQKAPGPEQVPAEESTFGQDIR  
RDSGPVRLIVSAVSSDIISFSSLSEMLGAQKAADFLNRYALWTHAASPLGGRIISTGSD  
SVIVLFGFLVDETNQADRALQAVYDFMDKFSGLKEDLAELALPNEVRISIGVHTGSVVAAT  
LGPPGEQKKT VFGDTIAVAARLDSL CREMHQEILVSHSTYRRLSLEQQATLDRIGEVLRL  
QSSRPVPVYTKK\*

>SPSA8\_v1\_280016|ID:41145702| conserved exported protein of unknown function [Spirochaetes Bin 1 SA-8]  
MKKLAKLTAILLALTFILAGADVFAQTKAKFHIGVVTGTVSQSEDDLGAERLIKDYGSV  
KTGGMIQHITYPDDFMSQQETFISSVVALADDPLMKAIVINQAIPGTTEAFKRVKAKRPD  
ILLGAGEPHEDPLVIQSSADLALSADFVSRGYTIIWAAKQLGAKTFVHISFARHMSYESL  
GRRRAIMEEACKDLGLK WAFETAPDPTSDVGVPGAQQFILEKVPQWIEKYGKDTAFFCTN  
DAHTEXLKQLFQYGXLFVEADLPSPLMGYPGALGLDLSKEAGDFPAILKKVEAAVVAKG  
GAGRFGTWAFFSYGYSL TAGLGEFAKNVIEGKAKKDSLKDVF TALGKFTPGAKWNGAYYVD  
MGTGVRAKNQVLIYMDTYVFGKGF LPTTKQKVPEKYYSIKAKK\*

>SPSA8\_v1\_280017|ID:41145703| Monosaccharide-transporting ATPase [Spirochaetes Bin 1 SA-8]  
MGHSGPLLSLKNVSKEFYGNVVLQNVSFDLHEGEILGLVGENGAGKTTLMRILFGMPVIA  
ETGGFKGSISIDGSEVHFSSPFDALDAGIGMVHQEFSLIPGFTTTENIVLNRESMHPSLL  
NNVFGERM SILDRPIMKTRA EKAI SKLGVQLDPDMLVSEMPVGHKQFTEIAREISRDKSR  
LLVLDEPTAVLTETEAEILLQSMRKLAKEGVAIIFISHRLHEVLT VSDRVVVL RDGLVVK  
DVPSKGLAVKDIASWMVGRSVSGETDRSNEERHFGEAILS VKNLWVDM PGETVKNVNFTV  
RKGEIFGIGLAGQGKLGIPNGIMGLYPAGGEVNFNGKPVV LNDPAGALKAGMAFVSEDR  
RGVGLLLDES LDWNI AFTAMQVHGQYLKPVLGKFLSLRDDRGMEDLCKEYISLLDIKCTS  
HKQKAKELSGGNQKICLAKAFALKPNLLFVSEPTRGIDVGAKKL VLDLHRYNREYGT  
IVMVSELEELRSICDRIA IIDEGRIAGILPATEDVAEFGILMAGETVSSEETANA\*

>SPSA8\_v1\_280018|ID:41145704| ABC-type transporter, integral membrane subunit [Spirochaetes Bin 1 SA-8]  
MRDLKTFIQDFGWPRIIFFFLVSLFILAPFVGVRLDASVSDVLNRFGQYAILVLALVPM  
IQSGAGLNFGLALGIIAGLLGSTLSLQFELRFGIFFGAILLAAPFSILFGYLYGKLLNK  
VKGEEMTIAMYVGFASVMLMCIMWLLPYNNPTMVWGYAGKGLRTTITVEGYWLKILNNF  
LSIPIGQFFVFTGLLLFVGFCAFCMWIFLKTRTGTAMTAVGSNPDFARASGVSADKMRV  
ISVIISTFLGAVGIIVYQQSFGFIQLYTAPSPMVFPVAVAAILIGGASINKANIINVLVGT  
FLFQGLLTMTPSVINSILQTD MSEVIRMIVSNGMILYALTRKTKVTK\*

>SPSA8\_v1\_280019|ID:41145705| ABC-type transporter, integral membrane subunit [Spirochaetes Bin 1 SA-8]  
MSAHKKSFTKFLSEYAVVLIFVVITLAAIAPSGLSIKYIVQEVITRLGRNSFLVIALLLP  
IYAGMGLNFAMTLGAMAGQIGLIFAVDWGVAGWQGLVFALLVGLPISILLGWITGKVMNK  
AKGREMVTGYILAFFINGIYQFFVLYMMGSVIPMRNPAIVLSRGYGV RNTLNLESVRQSL  
DSILMLRLGGFAVPIVTFVIIIGLLCVFIVWFKKT KLGQDMRAVGDMAVADAAGIPVEKT  
RIAILISTALACAGQIIFLQNMGNMATYNAHDQTGFFAVAAILVGGASVTHANIPNVFI  
GVILLHAMFIVTPMAGQRLFGSAMIGEYFRQFIGYGVIALSLVLYAWKNRKAIEDARSGL  
RQGQPVQKEQN DKGGKA\*

>SPSA8\_v1\_280020|ID:41145706| protein of unknown function [Spirochaetes Bin 1 SA-8]  
MNLAQTLKSKKFIIRALLVAAYILLGIXX

>SPSA8\_v1\_290001|ID:41145707|zwf| Glucose-6-phosphate 1-dehydrogenase [Spirochaetes Bin 1 SA-8]  
MNVINQDYPVCNLEAHRFAPEPAFFIIFGATGDLAHRKIFPALFDLHQEGALPEGMVIIG  
FARRSLQHAEFRKQVLEDVRAHARHSTFADSAFD AFSSRIWYLQADLEQAEGYQTLAKII  
AGENPGFFAADDGNPRSLSLPRNALFYLA VGPEHFGGIAENLGTAGLGTIAADSGKPDSP  
ASGNSWRRLVVEKPYGRDMESARALTNLLHRHFREMDIYRIDHYLGKETVQNLLYLRFAN  
SVFEPIWNCHHISAI EISVFEQDGIGQRGGYYDTAGAAARDMLQNHLTQLMCLVTMEPPAT



LDPESIRDEKVKVLQSIIRYSASELVRHARRGQYIEGTGPNGAVIPAYRKENKVSPDSAT  
ETYAQLTLELDNWRFSQVITLRTGKAFKFSQVIRFKRPPSALFAAQCGEKLVSNAL  
TIRIQPDEGVWLTFNALPGVPAIKASHLRFSWREVSNYLPEAYERLIADALAGDSTLFI  
RADESEHAWAVIDELEKAWRETDPEATPEAGGLWRYPAFSPIPPSQA\*

>SPSA8\_v1\_290002|ID:41145708| putative 6-phosphogluconolactonase eukaryotic type [Spirochaetes Bin 1 SA-8]  
MMIETFASREAWLSRTSQAVIMVLKHAADVSEKENFHICLAGGSTPKELYRIIAGSSECRAL  
LSAGIQIHLWQGDERCVAEGSPFLNSLMIIDAFRQTSEGAERWPNPPIFHRWTCDIQNL  
PEASAVRYAAELESQLAASGTNAFDLCILGIGADGHTASLFLSLQDAIDSSKPLAFPTMSP  
QEPRLRVTLRGNLLKSSSEVFVIAAGKGGKKAIEAVSKRKMMPVEAVLPEQAHVFYLET  
\*

>SPSA8\_v1\_290003|ID:41145709| conserved exported protein of unknown function [Spirochaetes Bin 1 SA-8]  
MRHHQRTIGTFFTACAFLLSASIAFSQPRPPVEKISFSHFTWTVRRTEEPQGPQGSNYFGG  
RDLVFSNPDGSVTLKLGKGIWYAAELTMDKRLGNGTYVFQIDTPLAQLDSNLVLGLF  
TYSRQNKFNHAEIDLEFSAWGIKKAPVLGQFVVQPYTIDGNYKTFPLPREEGPTS YAFTW  
LPDRIEFAAWLGHGPLPSTASPSLIAQWSYTNTQYIPKSGQEYLHMNLYLAEGCSSPSGN  
GRTSVMIRNFEMPMPAK\*

>SPSA8\_v1\_290004|ID:41145710| conserved protein of unknown function [Spirochaetes Bin 1 SA-8]  
MLKEEFIKKSPVRILERSIEGGLKPGNIGIIASKKIGKTSVLVQMALDKLMQGEKVIHV  
SFNAHTSYVISWYENIFTEIAKRKNLENISDLKDQLVRNRVIMNFTQEGVSDQIIRSLR  
ALIVDGAFAEAKTIIVDGFDGFRATAERFEKVKQFIQEMNLEVVWYSCTLGGEPIFDKHGT  
PIVLRIMPVISVLIVLEPLHDYIHFVVKDHERVNPQDLSLKLDSRSLIAEN\*

>SPSA8\_v1\_290005|ID:41145711|fusA| Elongation factor G 2 [Spirochaetes Bin 1 SA-8]  
MSTDIHKMRNIGISAHIDSGKTTLSERILFYCRKIHSIHEVRGKDGAGATMDSMDLERER  
GITIQSAATNVTWKDYTNLIDTPGHVDFTIEVERSLRVLDGAILVLCVAVAGVQSQSITV  
DRQLKRYHVPRLAFVKNCDRTGANPFKVKMQLQEKLGPNPAFVTIPIGLEDKLEGVIDLV  
EMRAVYFDGPNGEDLRFPAHLQADAKEYREELVESASMFSDELAEA YFEGNVSKDLL  
VGAIRAGCIAEKFPVFGSAYKNKGVQLLLDGVASYLPDPTEVRNVALDLNDSEKEVEL  
AADPNAKTVALGFKLEDGQYQGLTYVRIYQGELKKGDELNTRARKRFKVGRLVRMHANS  
MEDISEGSCGDIVALFGVECASGDTFCHPDLNYAMTSMYVPEPVISLAIEPKDKKSSDQM  
GKALNRFTKEDPTFRSFVDPESNQTIIQGMGELHLEVYIERMRREYKCEVEVGRPQVAYR  
ETITQRADFNTHKKQTGGSGQYGRVAGYIEPCEEQVYEFVDQVKGGAIPSEYIPSCDKG  
FKASMQKGLIGFPIVNRCLVNDGQSHVPDSSDIAFQLAAIGAFREAYEKAKPTILEPI  
MKVNVEGPTEFQGNIFASLNQRRGIITASTEDGTFCRVEAEVPLAEMFGYSTVLRSLTQG  
KAEFTMEFEKYGKVPTQIAEQLRKDYLEKRKKEQQK\*

>SPSA8\_v1\_290006|ID:41145712| OsmC family protein [Spirochaetes Bin 1 SA-8]  
MNRVWKAPQLAMTAKVAIFYLLHENAEIKGVRMMKAEIVSRWKGDMAFEADVNGHPVMMMD  
ADEAVGGHDSGPRPKALFLASLTGCSGMDVISILKKMREPCTWFEMRVEGTTAEHPKKY  
TQIKLVYRFKSDNLNPDNVRKACQLSQDKYCGV SANIKDSADLTWDVEFV\*

>SPSA8\_v1\_290007|ID:41145713| Major facilitator superfamily MFS\_1 [Spirochaetes Bin 1 SA-8]  
MQNWKKSFNALMVAELFAIMGFSTSNPMIPLFLRELGVHDATGLNWWTGAINGLSSLALA  
VFAPIWGALADHYGRKLMMLRAMIGGAVIMGLLALANAPWQVLMKILQGCVTGTVA AAT  
VLTASLVPAEAGYYLGLMQMSVFIGNSIGPLFGGVITDLAGSRVNFLATSALLALS AFL  
VIRFVAEDFITDKKTGSLKNAVPDFSAVRGNASLKALLILIFTIQFANA VVSPIPLVV  
LHMTEAFRGTGSLGSLIIGIASIAGALGALITGKVS NRIGYGKALLICIAGSFLFYFPQG  
FAVTPYQLLVLRFFTGFLLGGTMPSANALIAQQT SKEHQGAVFGISSISAGGNALGPAF  
GALANLVGYPAIFFIATLMLGLVLAFFM SKRILVSSQR\*

>SPSA8\_v1\_290008|ID:41145714| exported protein of unknown function [Spirochaetes Bin 1 SA-8]  
MESQTKRIVLAVLMIIVCASVFAQNSPRSTSATI QIVAVVPSILKLNLD FANSATATLLG  
YLRSDGTTNPMPAGKGNQFEIKPGATVELGSAHLFSNVPGSYTIIAYSANGGALRNSYSM  
TND AIPYSLILGSMQAVPQGGAFRFTASGKSTKDGTELKVALALGAVPANAPSGFYADQL  
MFSV SAN\*

>SPSA8\_v1\_290009|ID:41145715| protein of unknown function [Spirochaetes Bin 1 SA-8]  
MIISTASTIRFVWLSIAYLLFLIYFKYTFEKT PGRGNIGASIRNIMKNNRIF\*

>SPSA8\_v1\_290010|ID:41145716| Phospholipid/glycerol acyltransferase [Spirochaetes Bin 1 SA-8]

MDSIRDYKPLITEMMTHMGSQVSVSEKDLVQEGNKELLPYIDTIIADHLLPGSGIVGFE  
NLAALQQLSDKGEPCLILAEHYSNFDLPAFHMYMLRQHGVDGSKIADKIVSIAGIKLSESN  
PVVNAFAKAYSRIIYPSRSLEIHKKNYKDPNKL YHEVRRSFAINRAAMKALNSVKERGR  
IVLVFPAGTRFRPWEPETKRGVREIASYIKSFSKFCLVAINGNILRINPSGEMEEDLLHP  
DKVVLTVPVFDKFLAGIKLDHHRDDKKQEIVDHLMGILEKMHDDAERDRLS\*

>SPSA8\_v1\_290011|ID:41145717| Rhomboid family protein [Spirochaetes Bin 1 SA-8]

MKPDNLLRRPFRYSYFNATLYIIANIVL FALGFMFPYL RAYMALNPAAVLSGYVWQFVT  
YMFahasLSHLFVNMLGLFFFPPIERKMGSKFILYYFLTGTLAGIASFAIFALTGAWY  
TMLVGASGALFAVLLAFVIEPDAMIYLYGIPLKAPVMVLGYAGIEIVSQLLNFRSSVA  
HLTHLAGFVFGWLYFLVRFVFNPLKRLITRR\*

>SPSA8\_v1\_290012|ID:41145718| protein of unknown function [Spirochaetes Bin 1 SA-8]

MSKAQKQLLILSLPMLFVISCLAFWGAGASVVRTKGTIMETLLTRLKFDIAESVDSIVG  
KGDQLAALLAGNASVDEPGITALAERILREIPC VKGIAIAPDAIVKSYYPASGNENLIGH  
DLLTNPERRESLALAVESRKPIVSGPFSSVDGTVFFIRYPVFQHEKLWGFISLTISFDEF  
KNAIGLEQRY PGLQISISRSNRPFS AQSSQLQHGEAWDMGIQFGAASTLFSIALVLLFA  
ISLSASVFLFILLRQNNKIAQGKPAPRAGQKAAAVSTEHTQASSPALKAENLTQHNFRNT  
DNAKPEAVSR TKREKVEFQGPDPVPGQLFMPPEMLVEGNPAHVFAAYAGKTEPALEAESLP  
RLEKPASTVISFIKAETKPESPKIAVNHEEKAVQPEPELDFGKEQGMAREQTPVSIHDI  
SILVDDSEANRDIMGRMLALRKYNAEFASSGSEALALCASTQFDVIFMDCFM PGMDGYK  
TARALRDQKLAERSVIIGMSAKVGGQQLDLCMQSGMDDLLPKPFTISELEFRIRKHL S\*

>SPSA8\_v1\_290013|ID:41145719|secF| Protein-export membrane protein SecF [Spirochaetes Bin 1 SA-8]

MKRIIPFTRYFLPAVLVSSALILFGLFGFFT KGFNLGVDFQAGVNQTVQLAYPVASISYE  
GKGNAEMTVSETAITLVFSGAETDSKT VVLNYKDNPTVADLAKALEALPAVKVQLEPGQE  
NSASTLLVPTYQGNTLINLKPALVHRLPASDTERFASIDKVREAVKDMGRVSVQTINPTS  
QQRFMIRVQDEGKDPRTETARAGIISGLENAFGKNRVVEVKTD FVGARFSQGLTQQSIF  
LVLATMVLILLYSTIRFKFEFALGAVLAIMHDALIMIAFV VWSRMEFN TTTIAAILTILG  
YSINDTIVQFDRVREERKLRPTDKFADILNSALHTLGR TVITTATTMLAVLSLFFFTTG  
NIKDFALALLVGMTSGAYSTIFIASAFVLFWNQRKEKKGHASSIPAASAAGKAQPAK\*

>SPSA8\_v1\_290014|ID:41145720|secD| Protein translocase subunit SecD [Spirochaetes Bin 1 SA-8]

MSKTRRLITVIVVLAIAFAFLPTIEWYVLT PKEDQAI AVGSREQIRDFSRMAYSVLID  
IKNKALAGDSTDLSNQSKDLALVSVAKKAYS DAKRPQPKKYDAASILA AFSSSERAMFDA  
VEARFRERTLALKNLHGNAQLGLDLAGGMSVVIQADMKALAEKLGHDLSPAEREDAMKR  
GVEVLNSRIDKFLTEPVI RRQGEDQIYVEIPGTPDPERINSIIMGKGNLAFYIVDSEAT  
AALSSYLATNPLGVDERTMTVAQAGLIPEGKIIRKVYKKDSYGLDEFTGEYLVLEGK PGL  
DGSHIQSATVSSDQITGKPETNFVLDKEGGDLFYDLT SKNVGKTM AVVLDDR VKNYARIQ  
EPIRESVRITGFSADAEALALLR TAALPISLSVVTQQAIGASLGEDAIAQGKTAIIG  
LLAVLVFMFAYYK GAGVNATVAQAVNLFIMISVLTAFKLT LTLPSIAGFVLT VGM AVDAN  
VIIFERIKEELRSGKTRKAAIDAGFHKA FVAVMDSNITTTIAALFLAQLGSGPIQGF AIS  
LAIGNMTSLFTSLFLSKLIFDFETDVLK KQNV SISWRAE\*

>SPSA8\_v1\_290015|ID:41145721| Preprotein translocase, YajC subunit [Spirochaetes Bin 1 SA-8]

MNAISHGLVLLQAASANPTGQMVSTL VTFGLVFVIFYFLIIRPQNKKQKDMQKMIAGVKK  
GDKIVTIGGIHGTVYSVKEGTVVVKVDDDCKIEFSKSAIASVSVAKAEKAE EPASDKTE  
EKK\*

>SPSA8\_v1\_290016|ID:41145722|cpkA| Carbamate kinase [Spirochaetes Bin 1 SA-8]

MTGRKTIVVALGGNAIIEEGTEGTIEQQFANTRKSLDAIVGMIQEGHKVVLTHGNGPQAG  
VHLIRNEAASSQVPPSPLNVIVADTQGS MG YMIAQCLSNALLKAGVKKDVVTVITQVEVD  
PADPSMQNP TKYVGP FYKAEQVEKMRERGWV IKEDPGRGFRRVVPSPIPLDVIEKETIKD  
LIDDGKIVIAVGGGGVPVKREADGTL SGVDAVIDKDRASALLANLIGADELVILTVGDRV  
AINFKKPDQKFFDRMTVAECEQYLKEGQFPK GSMGPKIEAACDFIKRGGDKVVITTMENA  
TLAVDGRAGTVITA\*

>SPSA8\_v1\_290017|ID:41145723|ispH| 4-hydroxy-3-methylbut-2-enyl diphosphate reductase [Spirochaetes Bin 1 SA-8]

MIIHRAEVLGMCMGVRRAEALAREAGAAGAASGKQVFTYGPLIHNPQAIESLRKYGVQVL  
DPEQFELGLLDDQVKNSIVVIRAHGAPLSTFNRLKALSAAIIDATCPRVLASQKKA VQLL

HDGYVVIAGDASHGEVAGILGHAPGAMVAENPESARRIANSIKAGKAALIAQTTIKESE  
 YKAIENALKEKFPGLLVIQTICPATXDRQEALRLLDSDALVIAGGKNSANTKRLFMAA  
 LESGKPAWHIEKPEELPDEVFDKEVVGLTAGASTPDFIVDEVEKYLMQGANRHGIAE\*  
 >SPSA8\_v1\_290018|ID:41145724| Bacterioferritin comigratory protein/NADH dehydrogenase [Spirochaetes Bin 1 SA-8]

MELLNEIEKRRARRALSSQPLSRECLTRLVKAATFAPSCFNNQPWRLIVLEKATASPEYE  
 AVAAALTPGNAWALAAPVLFATGNHLDCRLDDGRDYAYFDLGQAAMALQLQAVHEGLY  
 AHPMAGFAPAKVRAAVHLPPELVPVCVIAVGAPGDMALLNEGQQKTEVSARSRKNISEVA  
 FMNFYGNADLG\*

>SPSA8\_v1\_290019|ID:41145725|udk| Uridine kinase [Spirochaetes Bin 1 SA-8]

MNPVKVIGICGGSGSGKTTIVRKISEVVSDVFVLPQDNYYKSAEFISNSNITAFNFDHPD  
 AFDNDLLIEHLTQLRSGSPIAMPVYDFVHHRTEQTIQVTPRKLIVIFEGIMVFTNKSVRD  
 LIDLKIYVDTDPDIRFIRRLNRDIKERGRTVDSVVEQYLVNVRPGHYEFIEPTKSYADII  
 IPEGGANERANLNLVTFINSVLNGAP\*

>SPSA8\_v1\_290020|ID:41145726| protein of unknown function [Spirochaetes Bin 1 SA-8]

MSKKPLSLTIVPMAVIIVSFVIGIAGANLLGVWKTNTKEPVKIKTGEFAGLPNPADIR  
 GSYSWADIGKAFNIDVQHLLAAFMATDPAVKVNTLEAIYPKEILPAGMEIGTSSVRLFVS  
 LYTGIPLAEEGTILPLSAIAVLKEFGKADPGLIAAAAAKAYDPSAKQPAPSPVPQPEKP  
 VKPTETASAVPAASSTTVTTIKAALASETAAQTTAKTTSTTAAGTAETHEVKTGTVTGK  
 TTFKDLKDWGLTEEKIKSATGGKIGSDNTVIKDWAEPNGLTFSELRTKLQALLDGGK\*

>SPSA8\_v1\_290021|ID:41145727| conserved protein of unknown function [Spirochaetes Bin 1 SA-8]

VLAWVSYMTIITGKLIFQDYDPYYTLFNFWTGEVAITGYIALALVILSLFVERPFCKYA  
 CPYGAFGLGIFNLFRIFGIRRNAPTCISCKICKACPMNIEVSTSKVVRDHCISCLECTS  
 ETACVPVATVQMLALPGTVQDSFKKKSETSEAAK\*

>SPSA8\_v1\_300001|ID:41145728| protein of unknown function [Spirochaetes Bin 1 SA-8]

MRGSMKSIGKNFCTHRMLEEYHENYYPAMAEGERLKAEHYESSRSLAAYLQKAYSQWPQ  
 ISVLQVSDDAGPVIARGTRITVNAIVNLAGLKPEEVRVECYRGKLSQGEIKDPERTEMK  
 PTAQEGSRCTYQAVVNGSSTGQVGYRILPEHPALNERFIPGLVTWA\*

>SPSA8\_v1\_300002|ID:41145729| conserved protein of unknown function [Spirochaetes Bin 1 SA-8]

MELSLFTMDDYDAVYALWQNTPGMGLNSIDDSRESIARYLQRNPATCF TAKEGKTLAGVI  
 LSGHDGRRGFYHLAVAASYRRQSVGRQLVERAAEALKAEGIAKVALVVMKNELGNVFW  
 ESIGFHQRNDLVYRDKVITDKTMRRMDT\*

>SPSA8\_v1\_300003|ID:41145730| HAD-superfamily hydrolase, subfamily IIB [Spirochaetes Bin 1 SA-8]

MQPIDELTAETARKIRFVLMIDDDTLTTDGKLLAESYAALWQLKKAGLVIVPITGRPAGW  
 CDLIAREWPVDGVVGENGAFWESEGRQLKALHPQATPNTSPLLQEIRDAALQQFPGL  
 RIARDQFSRLYDIALDFAEEEPRLPLATAAEVKKLCEQYGAHAKVSSIHVNAWLGEYDKL  
 SMAIRFLGERFGYDDAAMRGQVVFVGDSPNDEPMFAHFPNACGVANVIRYETMIKTLPAF  
 AADQEGGLGFAQIAAMLIARRTC\*

>SPSA8\_v1\_300004|ID:41145731| FAD dependent oxidoreductase [Spirochaetes Bin 1 SA-8]

MVESYDVAIIGAGVCGANIARRLSQYELRVALLEKEIDVSLGTSKANSIIHGGFHDNIK  
 YLKAKLELQGAMMFERLHNELDFFFERCGILVVALHEDEMRAIEQLYLQGVENGVIEM  
 CSRERMLELEPKLSSDTVGGLYAPTGGIVEPYRFVFLVESARKNGVELITQFNVAEAVS  
 ENGFWTIKAEDGRLIRARYVVNSAGLHADEVSKAFGGEEFTIKPRKGEYLLDKTTKSRP  
 GKVLPVPTAVSKGMLVPTVEGTVLLGPTATTVEDKEDFSTTRAELDILKSARSMVPS  
 ISETDVITSFAGLRPVYGGDDFFIDISKKAVNLIQVAIQSPGLTASPAIGEYVKDLLKKL  
 GLRLVEKADWDPYVRKVPRARDLSPFELDELVKKEPEYGEIVCRCERVSEAEIVKAIRDG  
 HTTLDGIKYVTRAQMGRCCGGFCTYKIIKILMRETGMSYEEVTKRGGDSVVLKGEL\*

>SPSA8\_v1\_300005|ID:41145732| FAD-dependent pyridine nucleotide-disulfide oxidoreductase [Spirochaetes Bin 1 SA-8]

MKNFNFDVAVVIGGGAAGMASALELKKRGSSVVIEREELGGILMQCIHNGFGLIEFNEE  
 LSGPEFAQRVHEQVEAQTIPSFCTTFLDIRPEGDRKIVYCVSSREGVMQIQARAILAM  
 GCRERNRGNIRIPGSRPSGVFTAGLAQRLVNIEGYIPGKDVVIIGSGDIGLIMARRLSWV  
 GCKVHAVVEILPYPSGLTRNIVQCLNDFNIPLYLSHLTTEIYGKDRVEGVEITPIQNGAL  
 VYEKSFRIPCDTVLLSVGLVPENELSRNAGVEINPATNGPWVDSTLMTSVPGIFACGNVL

HVHDLVDYVVEEARRAGSFAADWLAGKHPVRELRVKTGANVR YINPSRVDPSRQNKLYLR  
SLIVKNDSVLEVKVDNRVVKQLKKAHIQPSEMLTVSLGPDELAQSGMDAQIEVSL\*  
>SPSA8\_v1\_300006|ID:41145733| conserved protein of unknown function [Spirochaetes Bin 1 SA-8]  
MQEMICITCPIGCHLSIEKISDEEISVTGNKCQRGAQYAREELSPKR VVTATCRLKQLS  
NQTATVGGQAAAGSLYKPRRVPVRTAKAFPKERIPPELLTLLYQHEVSLPVERGQVIIPDAL  
GTGIDVIAERTMA\*

>SPSA8\_v1\_300007|ID:41145734| protein of unknown function [Spirochaetes Bin 1 SA-8]  
VTIGVTGAFGFLGASCIAELLADPLAPEQRLVAFGSSRFSSPLFDGSAVEVRSLDILDSN  
SLASAFADIDLLVHSAGRVGFAAKEKRSVWDANVLGALYVFNAARKAGVSKIINIASVSA  
LGPAPPEPPEISAPEPGISLCGNPAAFCKPNYLSWQDKNRWYRPLTEQDRPYDDPGSPW  
SFKXRDEALAAVRMSLAGDYAFLRRVSCIYLDKLANLELAHEL YQDKGLPIVNILPGTA  
IGRGEAHTGIGDLVRALASGRLKAVLPGACSFMDSDMFAQQGVKKALLFGRSGEDYILAGA  
PENNL SFSQLASLVLESCEPGMPSVPARRPVHSGEILELPCFPARLAGYLAERLLPGLAL  
SEGTVLSGCVKAPCSSEKAIRELGYAPFSPLKRAISEILK\*

>SPSA8\_v1\_300008|ID:41145735| Heat shock protein Hsp20 [Spirochaetes Bin 1 SA-8]  
MKGNRMYVDIGSILDDVFEAAKDFGEKMKNFPGFEGMDPGCNPFGGEGGDHGSWFESQ  
ADENADYYPNFSYPPMNIYLTPDRNIIFEFALAGFEEKNISLSFQGDYMI FSAKIDLEQP  
MDGVRFFKRRLKLDIEKQKYYVPADKFDQEKVAVFKNGILKVTVPPKEETESTEGIKI  
EIIKEEN\*

>SPSA8\_v1\_300009|ID:41145736| 2',3'-cyclic-nucleotide 2'-phosphodiesterase [Spirochaetes Bin 1 SA-8]  
MKRIALVLCILMVSFSAFAQMEPAQKSIALTFIETSDIHGAIYPYDFVNAKPLATSLAQV  
ASLIAEERAANPNVLLENGDSLQGQPTVYYYNF EKTAGPHIWSQAVNFLGYDVVSVGNH  
DIEAGHNVDKLYEEIQAPVVCANAVTPDGSTYFKPYTIEKAGVKIAVLGLTSPKIPDW  
LPPQFWTGMFEDMVESAKKWKVIQETEKPDILVGLFHAGVDYTYGNVTADTKFNENAS  
QLVAERVPGFDLVFVGHDSGWDGMGWDVKNKKVEVKDPNGKTVYIYGALNAARKVPV  
NMFLDWNDTTKSWEKRVRGGLVDISQYKSDPDFMAKFQDGF DGIKAWVDRPIGKMDGVIT  
TRDSMFGDSAFVDLIHRIQLDL SRDPSLGLKPADISFAAPLSADAKIPTSADGTL YVRDM  
FNLVYENFLYTMTMTGKQVKDFLEYSYKFWFDTMPNEGNHIINFQKDK ECKLVLDNR TN  
MPLTATRYNYDSAAGVNYVDISKPAGERVVITSM SDGRVFNPDATYTVAINSYRGS GG  
GGHLTAGARIDPTVIRTMKLVNGATTKDLRFFLLKWF EAQTETVTVGPIGNWEVLPADLA  
AVGAANDYPLLYPPKK\*

>SPSA8\_v1\_300010|ID:41145737| protein of unknown function [Spirochaetes Bin 1 SA-8]  
VNCCISRNRCAKPSAAWMATSTEAEPNYLAATIRITRLRN LALPFKTTI\*

>SPSA8\_v1\_300011|ID:41145738| putative Protein kinase family protein [Spirochaetes Bin 1 SA-8]  
VKASDRIGNYILIKELGRGISASTWLAEQIRAQDAAADAAAESDEPSPLAVLKILDSEA  
GSWNIVESFRREADALKTLYPGIPRYFEYFEAAEENRIRLGIAMEYIEGRNLESIIQSG  
QKFTETEVEHILAQLCDILAYLGLSRPPIIHRDVNPRN ILMKPDGTVALVDFSGVQDAVR  
TALFPGATLVGTAGYIPLEQVAGKASHRSDLYGAAATAV FLLTGRNPSELPSAGLRINLD  
GIVELSPRLKAVLGSWLEPDVAKRSLSAADAASILK GKRDAPLVRENEVYDDIQQARTND  
RDIRISGLARKIREAIQEQESQGLYSQRSSPVEYPEKLP SSDKVTVTGDETGLVIKIPR  
MGMKGQSGAGIFFPIFWLGFVGFWTMMTIGMRAP IFFPFFSLPFWGVGIFMAKTM LGPAL  
TSKELVITSDGLLIRTGLPGFEKATTWPLSDIGKVRV VNSATQVNNVRPKELLIEAGSRH  
LRIGTGLSERELLYLEKSMRETL SRMDGHQH\*

>SPSA8\_v1\_300012|ID:41145739| putative Tetratricopeptide TPR\_1 repeat-containing protein [Spirochaetes Bin 1 SA-8]  
MNTADSPGSVLANLNKKGLNLIDAGKYESAIAIFSEALGH ALSLGPTDAAGILYNRAEAF  
RLSGNLTSAKADILKALEFSPEDADIMHAMGLVCY EEDTFEEAAA WYRKAIIDIAPRHEKA  
WNDLGVIHFRSGEYESARQSFEKAVSINPDFADAWFN LADTYDELGLKAEYRRALEALNT  
ARMHVAEKDIL\*

>SPSA8\_v1\_300013|ID:41145740|hndA| NADP-reducing hydrogenase subunit HndA [Spirochaetes Bin 1 SA-8]  
MPLAQIEFSKELTEYVEEWGKKPGGLVMMLHRIQH EFGYIPREAAEKLSLMVGLPLAKIY  
GVITFYHFFKTSRPGKNRIAICMGTACYLKGGQDLVE ETQSILGIKGDEVTD DGLFSIDE  
VRCLGCCGLAPVLMVGDEVFGKVTKDQLPDI IAKYRNK\*

>SPSA8\_v1\_300014|ID:41145741| ATP-binding region ATPase domain protein [Spirochaetes Bin 1 SA-8]

MHFAVTDFLLDIVQNSCEAGASLIQLSIEETETSIAIKVADNGKGMDEAELKKALDPFYT  
DGVKHPSRKVGLGLPFLKQATEQSNRFEIRSEKKGKGTVEVFFQFFKHEIDAPPVGDIPGA  
LVSVLCMPGGHEMLISREKREAGIRYELSRKELAEILGSFERMDSLILLRDFVRSQEEQD

\*

>SPSA8\_v1\_300015|ID:41145742| NAD(P)-dependent iron-only hydrogenase iron-sulfur protein [Spirochaetes Bin 1 SA-8]

MAKMTLEELRALRDSKRQDLARRDVEGKEIQIIVGMGTGCGIAAGAKLTFDAIVEAVQRHG  
LQDKVLIRQTGCMGLCYVEPTVEVVMPPGMPSVIYGKMTQDIADKFVRKHLVEHTLLDNHI  
FDRPAADIVKK\*

>SPSA8\_v1\_300016|ID:41145743|hndC| NADP-reducing hydrogenase subunit HndC [Spirochaetes Bin 1 SA-8]

MAYKNFILVCGGTGCESSRSDEIYRNLLAEAEAQGVKSEVQIVKTGCFGFCEKGPVIVKVL  
PSESFYVEVKPEDAKEIIAEQVIKGREVKRLLYRKDQKTADNVKVEDIEFYQKQFRIVLR  
NCGVINPESIEEYIARDGYSALEKVLFEFMTPEQVVAEIKASGLRGRGGAGFPTGIKWETA  
MKVDSDIKYIVCNADEGDPGAYMDRSTIEGDPHSVLEAMIIAGKAIGANMGYVYIRAEYP  
LAIERLKTAAIAQAKEMGLMGQNILNSGFDVDFVEIRLGAGAFVCGEETALLKSIEGNRGMP  
IPKPPFAIKGLWGKPTVINNVETLANIPVILTKGAAWFAISIGTEKSKGKTKVFALTGKIN  
NSGLIEVPMGTTLREIIFDIGGGIKGGKKFKGVQTTGGPSGGIIVEKDLDTPISESLVAL  
GSMMSGGMIVMDEDDCVVDVSKFYMAFCVDESCGKCSPCRIGTKQMYNLLDKISKNGE  
MKDLENLEKIGTAMTKASLCMLGGSAANPTLSTIRHFRDEYIEHIVDHKCRAGKCKDLVI  
YSIDAECIGCGLCARCKPCVPCITGEKKKPHVIDASRCIKCGECKACKFGAVVKS\*

>SPSA8\_v1\_300017|ID:41145744| protein of unknown function [Spirochaetes Bin 1 SA-8]

LQLIMIVFPPFSALDYRAEFAGLEALAALDAAGSVNDMRLFLFPGDAGNRALSCAQTAAAD  
ALFSIDRVNDQVFAFARAALMINNMLDILVAEMTDRGKRRVGC\*

>SPSA8\_v1\_300018|ID:41145745|hndD| NADP-reducing hydrogenase subunit HndC [Spirochaetes Bin 1 SA-8]

MINCKVNGIPVQVAEGATILEASKKANVKIPTLCYNPDLPWAACGICVAKIEGSNKMLR  
ACCTPVAEGMNIITHDPDIVETRKTVIEMILSTHPDDCLACPRNQNCCELQTLAQEFGIRE  
QAFPKMLHDLPIDDTTGSIVLNPEKCVRCGRCVTVCCQMNVWAIEFLGRGETIRIAPAA  
DAKLGESPCIKCGQCSAHCPVGAAYENDQTKIVWDALRKTGDDAKTCVVQIAPAVRVALG  
EAFGLQPGLDGTGKIYALKRGLFDVDFDTNFAADLTIMEEGTEFVKRLTSALQNGLGTA  
TREKSMPLITSCCPAWVDYMEKYFPDMIPNFSTAKSPQQMMGAMIKTYWAEKANVRPDKI  
FSVSIMPCTAKKFETHRDETMCSSGYQDQDVSITRELARMIKQAGIDLLNLPSEPDSP  
LGPYTGAGAIFGATGGVMEALRTAYYLVTGNELKDVNFTAVRGISGIKEASVHVNGVVL  
RVAVAHQMGNIEQVLNEVRKARDEGRDTPWHFIEVMACRGGCIGGGGQPYGATDEVKRLR  
IRGIYDHDEGKEYRCSHQNPYIKKVYNEFLEKPGSHKAHELLHHTHYTERPLFLK\*

>SPSA8\_v1\_300019|ID:41145746| protein of unknown function [Spirochaetes Bin 1 SA-8]

MHSFTLTLFKEKRALGVVRMQLVRLVASRFLEEFVVHFLDVRVVLV\*

>SPSA8\_v1\_300020|ID:41145747| protein of unknown function [Spirochaetes Bin 1 SA-8]

MNQEKGSGKAASGQNYAVSITCDGREIPLVPYIETLFGATIGAMLGTLKGAEDAKSITIS  
LTKRTPPSQS\*

>SPSA8\_v1\_300021|ID:41145748| putative Molybdopterin-guanine dinucleotide biosynthesis protein B [Spirochaetes Bin 1 SA-8]

MKQCVISVLGWSGTGKTTFIEQAIRECKKRGIKTAAIKKSRHEPAYPAVVKDSNRYLKAG  
ARQSLFISEQAYIHETGTLSSGIQPLPPGDAVTIERWALSQIHGADIIFCEGLRPQHSLA  
ILACAGARSESELKYPLRDVDILITDSPELAQTAEECAKKAFLPDAAASFIEYILGIED\*

>SPSA8\_v1\_300022|ID:41145749| putative Methyltransferase type 12 [Spirochaetes Bin 1 SA-8]

MSAINSVLEHYYPYLAIAKNSKNTKESLNRSDVMRYGNSLRELQRGLTGNRELPGSGYL  
EHSQDLAVYTYLWYWPISFVQTFIALSEIAQRGRLPRIETLFDLGSFGPNSFAALEFGAK  
KCSLLDSSERALNTALTLAERIISNTSNFSISYVNLETMPDDALPGAETCDLIASHSI  
NELWKNPDAASRRERLLRNAWEQLAPDGLLLVIEPSAMVTSRPAALLRDRLLTSLPDAE  
CVAPCPGNSNPCMLQKGEARTCHSTWLWEPPQVAELARAAGLDRDAVKATWYALKKSKT  
RQTASADPCSAFGDTASALEGRIVSEPMLNKAGRIRYLVCTETGLKTVSAARTDSHAETL  
GFFGLKRGDLVRFSTLQAREGVFNGLSEKTSLHFIMKAPDQVSDCQKPPRKP\*

>SPSA8\_v1\_300023|ID:41145750| putative Diguanylate cyclase [Spirochaetes Bin 1 SA-8]

MEGMPPFSSVNQMFEVPRRLRNILATYGFSLLDYRTCKGVLSDTLTARGLSPETFFANSFE

AHLSSDAGKMRQAIQSLPASPTGKTSNQFRFINQETGNESWILMDFELFLAGEDGKPAL  
VLIHDQDVSELIKAQEEIRERLVEIESLKDLVLSINKSLDFNETSRKIIHLHRILPFDR  
ATVQVLEGTNLHIIDSYGYPEDAVMGMTFPARNIDNPARRAITTRRPIICNDVEHDFEGF  
VQIPGVAPTKSWLGIPLVYEGKTIGMFALDSSELHFYKDDHHIRIASGVADQIAMAVAHSL  
QHSKVKEAALKDKLTGAANRYGLETVGQTMFAAVQKEEQSLGILMLDIDHFKEVNDTWGH  
AYGDLVLKSLASEVNKDLRVDDYLVRYGGEEFLVLLPKATAREALVVAERLRQRIPQIEI  
IPGRSFPTVSIGIFAGIPGPLDQLHEFIQKADLGLYEAKESGRNRCRVWRANPEFYDKSN  
KNLVL\*

>SPSA8\_v1\_300024|ID:41145751| Tryptophan--tRNA ligase (fragment) [Spirochaetes Bin 1 SA-8]  
MSKSLNNAIFLSDDEKTVYKRVMSMYTDPKRVSADIPGTVEGNPVFQYHDAFNPDKAEVE  
DLKARYRAGKVGDVVEVKEKLAKALNEFLDPFRERRAHYESKSGLADEVVYDGTMMKREEA  
RKTLIAKKAMGISAVWNRISRKAEDVKKKQAERL\*

>SPSA8\_v1\_310001|ID:41145752| Aminomethyltransferase (fragment) [Spirochaetes Bin 1 SA-8]  
VLHDWHAHGAHAKMAPFAGYEMPISYPTGAVEHAITRRSVGLFDIDHMGQFEVSGPGADA  
YVARMVSAKTSMEAPMARYSLLDERGLVLDLFIYKLESSWWIVVNASNREQDLAWFM  
EHKTPGVTTIDHSDATYMIAVQGPNAIALLDKVGAPAVSALERFTWGRIRIDSIDILFGR  
TGYTGEDGGELFFPAEHAERLWNYLLEKGGELGIETKPIGLAXX

>SPSA8\_v1\_310002|ID:41145753| putative Lipoprotein LpqB, GerMN domain protein [Spirochaetes Bin 1 SA-8]  
MAVKKRKKKQSSGTGCLLFTILFSVLLVLFIIKFPQIKATLEKTGLLQKLSTTVTTVPPV  
PPEKTQIPSSATSVPAEAPASPGTTTIQPREGNQVPQISTSTAETTRTVSLYFVSIADD  
GVISSHEVKRAIKATDTPLSDAVKALLEGPSENEIRSKLISLIPRGTKLKGVS MRGSTAI  
IDFNEAFMYNRFTEGYTAQLKQIVYTVTAFPSVQDVQILIEGKLVLYLGGEGVFTGKPL  
SRNSF\*

>SPSA8\_v1\_310003|ID:41145754| conserved protein of unknown function [Spirochaetes Bin 1 SA-8]  
MQGRVELAQAFIGETMERFQSSSLPDKTLLDSSLHEAVAALTAENPEKRPYSVSAREKL  
PGGFVRLSAPHVILIPDLHARFDLSAVLTASIQAEGLWDESRTLDSMDSGLLEIVCLG  
DILHGESPESARNWVLA AEKFAKDGRDESLFSSEMDAEMGTSIAALMLVLKIKALFPESF  
HCLKGNHDNMSNSSCDGDFAFYKYAREGAMGAAWFLRYGDDLLKQMRTYERFLPLVAAG  
RWFCA SHAEPRAISLEDLLNYRERPDVVTDLIWTGNGSAE EGSVRESLANLMSPGDVAG  
FEGLWFSGHRQVNGHYALRQDGALVQIHSAREQVLLPNRISGPWGVQNGLKAPRAVF  
LELDRQYLVPSAFLR\*

>SPSA8\_v1\_310004|ID:41145755| putative Tetratricopeptide TPR\_2 repeat-containing protein [Spirochaetes Bin 1 SA-8]  
MNNSERIRDRAEKAMSTIVFIQARQSILEQLGYQGLDESIPLPVQLPGPVARFDASMIT  
ESIITGILRFLAWKPDAEHA EYYRTL VKALRPSLLEELSNAGIAKAEAEHEWEVAEEIFLA  
LAGLYPEKPEILLDLAMLHEEHAKALEQE QDEECAEAEDDAA YDYKMLL GREPPYAPAY  
YYAALFFLRKKTFRASSLLTTFISLSDDERRVQKAKDILAKLKKLGYLDTTFKEAFDFI  
RMGEDEKGLAKAQEFIERYPDVWNGWFLAGWAHRKLRNWEKGKEAFQKAIDLGSEADTF  
NEMALCQLETGDFTGARTSLERALRFEPENVKIIANLGALEYRMGR TAEARGFFEA AVEM  
DPDDTVSKTWLEKLDKEAGGE\*

>SPSA8\_v1\_310005|ID:41145756| conserved membrane protein of unknown function [Spirochaetes Bin 1 SA-8]  
MISFFIKKAFFDGDWNLFLSLAALNAVHLILAFVSVLPMSMGADGLTAFACITV GIFLLS  
LWQSICAFAMCEVANYSRLGIKATLAFPPKALKPGLLTGLFSVLIWF AVSVGIPFYIMQK  
GIVGVFLAGLLFWTCLVGLLVWQYYLPLEARLGGGFKKNIRKAFILFLDNPGFSLFLFGY  
SILTIAVSALPAFLAPGLAGLALA QADAVKLRMLKYEWLESTPNADKHAVPWNELLAE EK  
EMVGVRTLKGMIFPWKEGK\*

>SPSA8\_v1\_310006|ID:41145757| Ornithine decarboxylase [Spirochaetes Bin 1 SA-8]  
MKEQYHFPLENYMSRERFERIKSFAKDKETPCLIIDLDVIKKNYEDLRKNL PFAKIYYAV  
KANPDDAVVSLLRDLGSNFDVATRYELDQLLRLGVTPDRMSFGNTIKKEKDIA YFYEKGV  
RLYVTDSDITDLKISR AAPGSKVFFRLLTEGLGADWPLSKKFGSHPDLTRQLIKTAVRFG  
LEPYGISFHPGSQQRDVGVWSSALTTV GQLFAWARDLKV ELKMINMGGGFPASYIEPTD  
TLPQYAEDIKRFLDNSFKNQWPEEIIIEPGRSMAGDAGVIVSEIINIAKKS VHERYPWVF  
LDVGKFGGLIETLDEAIKYPIYFESEGPAVEVILAGPTCDSMDILYEKTTYMMPENTRIG  
DRVYIFTTGAYTQSYSSVYFNGFPPLKSYILPKS\*

>SPSA8\_v1\_310007|ID:41145758| protein of unknown function [Spirochaetes Bin 1 SA-8]  
MKAEEQKTRKKSRLPKSGRLPAVMSVLTAAVLGLFVIAIGQKSGSLRISAQETVLSPPKT  
FPAETPAITASARPIRIANWNIHDCAFYNAKTKEREPLHQYVAKALHEAKVDIVVFEEIQ  
GDTKKGGDIALLSVSLAKEGWSMPYVALSTSKSEDDIAVFSRYKIVESGQVLVPGSSDLW  
PRPGIYARISLGSQDLDIYGFHFKAMDDEKSHEARLAQAKALADLLISRYGAELSQKPII  
LAGDFNTVSSADFLENHSVLSFLSLKEDTDSGNDFLPVNYSFYPAEPTFVDKNYRSLLDH  
ILISASLAKNASEKNTFVMQPPSTEAGIPVSDHRMIITDITMPVSP\*

>SPSA8\_v1\_310008|ID:41145759| Aminotransferase class I and II [Spirochaetes Bin 1 SA-8]  
MNQLAEELNSILANTAAGRLLSEMGRMYFPKGILTQSAEATEKAYKYNATVGMAYEHGE  
PMMLDALKEALPGLTPKEAVAYAPTGGIMPLRKRWKESLYRKNPSLIGKDFSMPPVVPGL  
TAAVSYLTDLDFVEPGDTVVPDLHWPNYRLIIEERKTAAGLTFPIFSNGGYNLEALAARL  
REAGARRGKAICILNFPNPTGYSLTAQEADKLIAMLVDIANEGTDLLVIADDAYFGLQY  
EKNLLEESIFARLVDAHQNILAVKADGPTKEDYVWGFVGFVTFGGKGLTDVHQEALVKK  
LLGITRSSVSSSSGLAQHLLKALEFKGYEDQKARYRAILEGRYKALKAAISKAELPDAF  
IPLPFNSGYFMSFECRGFSAERLRIRLLNNHGIGTISMQDKYLRVAFSSVEEEDIPDLLD  
KILLVVREIVENFKG\*

>SPSA8\_v1\_310009|ID:41145760| conserved exported protein of unknown function [Spirochaetes Bin 1 SA-8]  
MKRFFSVLLILAAVTGMAFAQVDLSKVKNGVYFAQDEAFGKTGWKEQVIEVNNGKIVRA  
VWNGVSNIAGAVDKKSYAASGKYGMIKASSIKAEWDAQAKAVEEYLVKTQDINFSKIKAD  
GKTDAITGATFTVSEFFTLAKKALASAPVAKGAYKDGWYYAEQPNFDKSGWKDYVVVTVV  
NGSIVDVVWSGIPKDPAKKSKLVEAQLGTYKMNAKQGEWNVQSERLCQAIVKAGDPAKIT  
LKADGKTDVSGVSITANAVALAIEALKAAS\*

>SPSA8\_v1\_310010|ID:41145761| conserved protein of unknown function [Spirochaetes Bin 1 SA-8]  
MQKKTAFIAPSASVTGDVLMKEDSSIWHNATVRGDIAPIEIGKRSNIQDGAVLHVAHNHP  
CIIGDDVTVGHGAIVHACTVHDCCLIGMGAILDGAIEIGTESIVGAGALVTGNKHFPPRS  
MILGNPAKVVRQVSDEEARKIRESAEHYIVLARKASTDSMTAES\*

>SPSA8\_v1\_310011|ID:41145762| Carboxymethylenebutenolidase-related protein [Spirochaetes Bin 1 SA-8]  
MKEQSAEKKKFRPGWSVIAAAILVLLFIVGSGFVAGLPDLSDPQLKSSNTVSVEKIGKD  
LYFLPKAEKKPLGFIFYPGAKVPEGAYSYLARALAEKGYPAVLLKMPLGYAIFDTKAAAR  
AMQQLQETKAWVVAGHSLGGVAAAMFARDNPGTVKGVVFLASYPAGGSSLAQTDLQALSI  
SASNDMLATAEKIEKAKPLMPPKAEYQVIQGGNHAQFGTYGDQKGDGVAEIPASLQLSAV  
IESVLAFLAKTM\*

>SPSA8\_v1\_310012|ID:41145763| GHMP kinase N-terminal domain protein [Spirochaetes Bin 1 SA-8]  
MIPSAVPIHSLKELYSEAEYPAALARYRKLEDRVRAWTRSDSHSNAPQTEAVTWFSFCPG  
RTELGGNHTDHNHGRVLAGSINLDMLATVLPQDSLNVNWSEGYKPFVSDIADISIRANE  
KGSSAALTRGLAAFLSKKANSPKLRGFDACMDSTVLPGSGLSAAFEVLIGSIIAAVNS  
IEASPTELAIGGQYAENEYFGKPCGLMDQIACALGNICAIDFTKPSRPGIEQLAFDFSAH  
GYELIVVNSGSSHADLTDDYAGIPAEMKAVANLFGKQTLNEVSEQEILAQAPEIRKKIGD  
RAFLRALHFAAETRRAASMKEALERGDLSVYFELVKESGLSSWRLQNIVPAGAVRDQNI  
AVALALTEKFLGKDGACRVHGGGFAGTIQVYLPVPSGRIAEYIDYMKKVFGAEQVFPLQIRS  
HGVVCLDRI\*

>SPSA8\_v1\_310013|ID:41145764| Major facilitator superfamily MFS\_1 [Spirochaetes Bin 1 SA-8]  
MNEKKAGFKPYLKLTFLLIGFGFFTMGLMDPLYDTYVPIFLGKYVSSMTLVGFIMTLDNIF  
ALFLIPLASVSDRTDTRIGRRMPYIITLLPLTALFFGLLPYAAGISLGALIALIFCLNL  
VKQSARGPVVALMPDIIPAEFRSEANGVINTMGGIASIVGTIGLARLMDIDLVPILGHT  
KDRLPFPLAGLFLVIAVLFLFFFIKEKKQPGKADNEERVPILQSFKSVASQQDKSALYIL  
VSLFLWFLGYQGVLVFIGKYSVDVLKTSSGSAALAAGMVGIAYAIFAIPSGYVAHRVGRK  
KTIRTSLVIAIITGILFLHDPLTSGLSPSIRLFSFWLIMFVFGMFWVSVVTNSFPMLWQ  
MASWGTMGVYTGLYYTASQAAAILAPVLTGAIIDLAGYRGIFLFCVCMVAAFLVMGLAT  
SGEPDSKTR\*

>SPSA8\_v1\_310014|ID:41145765| Amidohydrolase family protein [Spirochaetes Bin 1 SA-8]  
VYLCNPAFQTAQAVAVKDGRIVIGSRDELEIRYSARRFLDLSGQYVYPGFIDPHCHFLS  
YGYVLQRADLFSTASWDEVLERLVSYKAKKPAFWILGRGWNQNDWVTKEFPDRTRLDELFL  
PDNPVLLTRIDGHAAIANARALRLAGITADTRVEGGAVSAENGSPGLLLDNAIDLVRVAV

IPAPSREEMTDALLRAQQNCFAAGLTSVSNAGTELDEAILMYRLQAEGRMKMRIYVMLAA  
GARETAFALGKAPDGCPLPGSIFQNESLSIRSFKMFADGALGSRGAFLEPYADDPDNRG  
LLTCPQQDLERQCSIAADCGYQMNVAIGDAAARMVLDSYARFLKPGNDLRWRVEHAQLI  
HADDLPKFGRYGIIPSVQTTTHATSDMKWATARLGKHRMPYAHYRELLAQNGWLANGSDF  
PIEKIEPLRGFRSAVFRTNDEGEPKGGFQPENALTREEALKAMTIWAAKANFEDHLKGS  
EAGKLADFTVLPADLMEVSEERLRSIKPSMTIVGGEIVF\*

>SPSA8\_v1\_310015|ID:41145766|ycjV| putative sugar transporter subunit: ATP-binding component of ABC superfamily transporter [Spirochaetes Bin 1 SA-8]

MAKVELKKIGKVYDGNVRAVDNANITINDKEFVVFVGPSPGCGKTTTLRMVAGLEDITEGE  
LYIDDKMVNDVPPKDRDIAMVFQNYALYPHMTVYDNMAFGLKIRKLPKEEIDQRVKEAAR  
ILDIEKLLDRKPKQLSGGQRQVAVGRAIVRKPKVFLFDEPLSNLDAKLRVQMRAELIEL  
HDLRQATMIYVTHDQVEAMTMGDKIVVMKDGKVVQIGSPLYLYNNPINKFVAGFIGSPPM  
NFLNVKVSEENGVIWIDEGSFKIKPAEAHVPLLKAYVGKEVFFGIRPEDLPIPEEHDNT  
FRAKVTLVEPLGAEIHLQAATATQTMTARIPPHLYKHGDEIEFAPVMTKAIYFDKETEK  
SILPVKWNEQE\*

>SPSA8\_v1\_310016|ID:41145767| RNA methyltransferase, TrmH family [Spirochaetes Bin 1 SA-8]

MMNIARLKNLHGIARLRKIALMLSQIEHEIACSEAQPEILNLLHQAGLIADFLEASGEST  
PELLLAARQFKASAGNAQTQNFDLCFRALNNFRHTAMRGAGQAPADWDFWDYRGTSAEQV  
RDERFFYPGLKVYLEDIRSPFNVTIFRTAEAFGFEEVILSPGCADPRHPRALRSSMGTI  
DMIPWRRASLDEASPGASGIFALELGGTPLGSFTFPRSGLLILGSEELGVSQNALSLARV  
HAGILSIPMKGKASINVAVAFGIAASAWASSPTADFNFEKSSLTEAENQSKLNLIT\*

>SPSA8\_v1\_310017|ID:41145768|rsmI| Ribosomal RNA small subunit methyltransferase I [Spirochaetes Bin 1 SA-8]

MGELYIVGTPIGNLEDITLRALETLLKKVDYIACEDTRQTLKLLSHYNIHKPLVSCHANDE  
LKASRKIVSLLAGGASVAYCSDAGTPGLSDPGAVLAREVRREGYRVVPIPGPSAFAALIS  
VAGFGGRSVLFDGFPSPKASRRKTRLAELLAREEAFVLYESPYRIAKLMRELALLAPERE  
VCIGREMTKLHEDIRTGTACELAALFEAESSGTSLQETPIPARGEFAILVSGRENQAGLP  
EDECSQGRD\*

>SPSA8\_v1\_310018|ID:41145769| conserved membrane protein of unknown function [Spirochaetes Bin 1 SA-8]

MFSRYPVTMKNKTDTKKQVFLIFFLALFLLVARLFYPFLT VIIWSGLLYAFLEPLFEKLAS  
GMGQKNSSARKRPLAKTITAGLFAFLGVFILVVPFIYLFISLLRQVVDLAGNLIRFAESH  
PDIVLSATSPVGGFLFRVSGGTIDLSSINVHELKVFLTNSSSRIIGLSGALLKNSAGL  
LITLAFMVFTLYFLLMDGKALFDIVVSAIPIEKSYTAMFMKKLRESGKHLVLGFFLVALY  
QAFAMFILALAFKFKSPLVLAFLTAISSFIPMVGTVLWVGLVLYLGLTGSIGKAVLFL  
CAGFFISFVDNFLRPMVLGNRLSIHPLLIFFAIVGGLSLFGFNGLILGPLILIFFSAVE  
LYEMQDQLADDVQEKS GSS\*

>SPSA8\_v1\_310019|ID:41145770| PHP domain protein [Spirochaetes Bin 1 SA-8]

VDGITEAALAAEAGITFIPGIEIEIEFNPGEFHLLGYGLDIKAPALTAALQELKKAREE  
RNATIASLFTSSGIGIDIEKIKTERKSSYIGRPQIAEALVAQKIVKTKQEA FDRFLGKKG  
PYYLPKECLSFERALEVIRQAGGVAVVAHPYSLFVSKSKLASLMDEWKERGVQGIEAYHP  
AAKPGPCRTLELMARERGFV TAGSDYHNP GKPLCGIGRTSGNVPISDDFYQELLPLFSW  
TSSAN\*

>SPSA8\_v1\_320001|ID:41145771| putative Carboxymuconolactone decarboxylase [Spirochaetes Bin 1 SA-8]

MTIQERFEARQRNGAEIQKPMQLFGSLDEKSTHAHLDAKAQAFAPGALS VKMKALVALGA  
AVALDAPSCIMNNVKLAKNNGAAKEEIMEAIAVAKFSKSATVLANAAPALEWLMTQEAAS  
AENKA\*

>SPSA8\_v1\_320002|ID:41145772| conserved membrane protein of unknown function [Spirochaetes Bin 1 SA-8]

MISAAVLFKGLIAALIVGFVTSSIRSWIDRVFLVIMLITIVGLPINEAIQINLLVLAFSA  
LFHILRNGKQLKNDLPAGSSEWLIIVISASIGGVAGRLANSAAAPAVLMGTLGVYAILVG  
LRILYIKPIPEKEIKAHPVLLSPVSLAGGFLTGLISAGGKPFIVPAYNNAMGHHPKRAYA  
LASLGVVAGAFASILTQAVLPGSFSADQLLLALYEFTLVTLVALLVNKFWTEKLAKIVNL  
TIAPILMLVGKIFLSSILK\*

>SPSA8\_v1\_320003|ID:41145773|arsC| Protein ArsC [Spirochaetes Bin 1 SA-8]

MVKVFLFCVHNSARSQMAEAYFKALAGDRVVVESAGLEPGVLPNPYVVEAMAEDGIDISSN  
PTKSVDFDYKQGRFLDYVVTVCSEAAERCPIFPGNAVRLHWPFFADPLQFKGSHDEIMAQ



VRDVRDAIKQKVIEFYQSLNI\*

>SPSA8\_v1\_320004|ID:41145774| putative PTS IIA-like nitrogen-regulatory protein PtsN [Spirochaetes Bin 1 SA-8]  
MDTILDALQEGRLFELPENDKTHALQFLAHIIIEAFPQIPTGTDIVGNVMARENLTNTALG  
KGWACPHARVDFEEDLMCVVGWSPTGIDYGAPDGKPVSIITMYLVPSNQRNHYLREISVM  
AKVLKSAQDTEKLLKLADLNEARNYLLDLVSASKDTIGPDARARMIRLQSKTAMATQPIG  
DLSNLVIEPVSIIITGTGPKPLALTQNQELMIFIESLPLGLADKLENEGSYQNGTWRIIRRH  
TVAYQGGRMVYDCIALANVKANSSAVQQAKQNA\*

>SPSA8\_v1\_320005|ID:41145775|mgtA| Magnesium-transporting ATPase, P-type 1 [Spirochaetes Bin 1 SA-8]  
MAKQMFPVKKESTDALNVQRQADEARLRDLCCIPFEVFQNLKTNANGLSDKEAEDRLSR  
YGNELSKAESKGFRRDMAERLQSPVIQLLVIAAVSGIIGQFTSSIIIVSLMIVLSVGLS  
YILDARSNREVEALGKRVQSRTWVLRDGKEVEIKMAEVVPGDIVLLQAGAIIPADVRLIS  
AKDFFVSESALTGESMPVEKSANLSGNSSSAVLELPNACFLGTSVTSGSARAVVINTGAQ  
TLFGEVSRKLGKRIETDFDKGIRAFWLMIRFMLVMVSVVFLIVGLTKGNWLEALLFAL  
SVAVGLTPEMLPMIVTVNLA KGALAMAKKKVIVKKLPSIQNLGAINILCTDKTGTLTQDR  
VVLEHHVDIIGNKSEEVLYAYLNSYFQTGLKNLLDRAVIEHVDLDVDECKLVDELPDFD  
QRRRMSVVVDYEGDNVLICKGAVEEISCTHYQIDEEIYPLIDMIRADLFEEVEKLNRE  
GFRVLGIA YREFPKYKNVFTVEDESQ LILLGYIAFMDPPKESATEAVKLLDRAGVKVKVL  
TGDNGLVTEKVC RDVGI AFANSMTGAALAQLSDAEFAEAVVKNDVFVKLTPSQKEKIVLE  
LRKQGNVVG YMGDGINDAIALKAADVGISVDSGVDVAKEAADIVLLEKSLVLEEGIMEG  
RRIFANI KYIRMGASSNFGNMFSVLGASYLLPFLPMRPLQIL TNNLLYDFSQTGIPMDR  
VDPEQIAKPV RWDIQNIKRFMIWIGPISSIFDYATFALMWFFFKASAYLNPALSLVQKDG  
LERLFQSGWFVESLLTQTLIVHIIRTRRIPFFQSRASAPMLMTTLAVMAIGAWLPYSPFA  
GFLGLVPLPAIYWLWIVGFLVTYSILTHKVKRIFLKRFEGA\*

>SPSA8\_v1\_320006|ID:41145776| Transcriptional regulator, ArsR family [Spirochaetes Bin 1 SA-8]  
MSITTLDKVVKYCNIYPMTEEEKRRCEL RANMFKALAHPLRIYMLEKLERPWCVC ELA  
AELGVDKSIASKYL TILK DAGLVGMQKRGILVEYTLIAPCVLNLAACAESDVFSNRKKAL  
LG\*

>SPSA8\_v1\_320007|ID:41145777| Redox-active disulfide protein 2 [Spirochaetes Bin 1 SA-8]  
MKVQILGTGCSKCR LLEDHVRQALHDYNITAEIEKVTNIDDIMAMGVMMPAL AIDGVVK  
SVGRVLTKEQLLPFLKGEK\*

>SPSA8\_v1\_320008|ID:41145778| conserved membrane protein of unknown function [Spirochaetes Bin 1 SA-8]  
MAGKTEWTPNKKLLL VFGVFLAAYFIPFQAPRVISATNEAFLMLSEYARQHVILCLIPAM  
FIAGAITIFLNQQA VMKYLGP DANRLTAYGVASVSGAILAVCSCTVLP IFKGIYKKGAGL  
GPAIAFLYSGPAINILAIVLSAKVFLKLG IARTVGA IIFSILIGFIMSVIFKDDQORT  
KDSRLFNAGMEEGRTL GQMAFYMASMIGILVFANWANSRGGSPVWDAIFSAKWYLTA AF  
GIMLIFSLRKWFSKDDQLAWVVA TRDFALQILPLLFGGVLVAGFLLGRPGHDALIPSSWI  
ASLLSGNSLFANLFASVAGALMYFATL TEIPIVQGLLGAGMGQGPALALLAGPSLSLPS  
ILVISGEIGWKKTLAYVALVVVFSTLAGIAFGAIA\*

>SPSA8\_v1\_320009|ID:41145779|czcD| Cadmium, cobalt and zinc/H(+)-K(+) antiporter [Spirochaetes Bin 1 SA-8]  
MEHNHSHEEDADEFASGKKFILSIAITITLVAEVVGGILTHSLALLSDAAHVFLDIFAL  
ALSYGAVRLAMKAPNSQHSFGFKRMKVIAAFINGSTLLIMAFEIFLEAIKRFSNPVEVLA  
GPMLIIAAIGLATNLLVALVLKGDHEDLNARA AFLHVMGDALSSVG VIAAGLLIMLTGQ  
TWLDPLASILIVAMLLFQSIKVLKSAIHILNEGNPDGAASDEVQTKLEALPAVKDAHDIH  
VWTIEPGYRVL SAHIVVDDMAVSS TALIARDIKAMLHDHFNIEHATLQFECVHCGQDCQD  
PGCDGSHN\*

>SPSA8\_v1\_320010|ID:41145780| exported protein of unknown function [Spirochaetes Bin 1 SA-8]  
MKYKSILLIVSVLLFVPFFSAFSAESSVDL VINA EVRPLLSIVMTSPPVFQLIDADGNAI  
VSRNLGTAIVKSNYRNWTVQISSNKNLPATGRLKKIDDNVYIPYTFELRTGDSVLVSQF  
DTPSAAQGITASAGRQLSVFNVD PGETAMWEKGIYQDTITIVVVAT\*

>SPSA8\_v1\_320011|ID:41145781| exported protein of unknown function [Spirochaetes Bin 1 SA-8]  
MKKLVALAVVAFVAIGASFAADLVINGSVTAALSVAITNSPITVTL DGTGTAGTVDR TAT  
LNAKSNKKNWTVSFD SANDGKLKSALTGVEIPYLLQASTPAWGSAGVTNGLATAVNPEGK  
TIVVTDGKT PRDGVNFTLTVTPAQDGAELFEAATDYTDITISIAAS\*

>SPSA8\_v1\_320012|ID:41145782| exported protein of unknown function [Spirochaetes Bin 1 SA-8]

MKKFALVALFALVVFVGSAGTSGTVGLSGTVAPQFELTLPGNYTAGTMNDGASEVNTWT  
IGNVAVVSNYKNWTISVSSANSGYLVHSTDNTEK VQYTM TLGSLATNQSLGSLWTSAAQA  
RTPKTGSTYALSIFKFTASATDFWQTGT YTD T LSVSITHP\*

>SPSA8\_v1\_320013|ID:41145783| exported protein of unknown function [Spirochaetes Bin 1 SA-8]  
MKKRALVTLLVILASLPVFAATAGGDGTL SIQGT LNAHVELSLPPSFEGEIIDTAGYLNS  
WDLGTLNVNTNFKNWKFYLSSTNAGSLVLF G DPTETIPYTIKLV RVSDDEEKVFDNVALDS  
PLISDVQPRTPKNGLDYELFLEFTADETSQWENG VYVDTIYISIATN\*

>SPSA8\_v1\_320014|ID:41145784| ATPase-like, ParA/MinD [Spirochaetes Bin 1 SA-8]  
MSLVPEKKS NPKIRHVIGV VVSGKGGV GKSTVAVLLA QSLASQGRAVGLLDADITGPSIPR  
LLGVDTMKGESDGEHLFPIENE EGIRVLSINLFNDNEDAPVIWRG PLLAKAIEQFWQDTD  
WGDLDYLIIDFPPGTS DIAL TALQQIPFSGIVV V TTPQDYVSMIVRKQINMATMLKAPVI  
GFVENMRTL VCPKCGEVIKLFD DGS DAQKALGLPILASLPWRQEVAQACSIRWAMLPEAV  
KKEALAI AQQVEMSAASAK\*

>SPSA8\_v1\_320015|ID:41145785|lysA| Diaminopimelate decarboxylase [Spirochaetes Bin 1 SA-8]  
MTNAVSIKNGRLFFDGVDMTELA A IYGTPLYV VSESIIRERIERIKIEFLNKYPGTIAAY  
ASKAFQ TLEM CRLVASEGLGFDV VSGGEIFATL KAGADPADLIFHGNAKTPDELRYAVQH  
GVGRIIVDNLNEIAQLERLGA VFGK KIPVLYRITPGVDSHTHRFISTGSLDSKFGIPLNQ  
EVREMYMHA VLRSPHIDFRGFHFHVGSQ LHDNFSLAALDILLDLVRQVKA EFGFAAREI  
NLGGGFGIQYLPTDPD PGLSYFIEPMMK KIEEGFSSAGIPQPTVII EPGRWIIGEAGLTL  
YTIGAKKEIPGIRTYL GIDGGMTDNIRPAL YEARYHALIANKAERTGDTLV TIAGKCCES  
GDILIRDIKLPDPQPGDILA VFSTGAYNHAMASNYNRIPRAVVMVKN GSHHLSVRRETW  
EDLISREL\*

>SPSA8\_v1\_320016|ID:41145786| Amidohydrolase [Spirochaetes Bin 1 SA-8]  
MPETTLEMIRRYQPWLVEIRRQLHQIPEPGDAEFK TADSLCRILETLKIPYTRKRTSIVA  
LIEGNKPGKTVAIRADMDALPVDEPENR PYASCHKGYMHACGHDAHMTALGAARYFAEH  
RAEFGAVKLLFQPAEETTGAENMIKDG CLEDPHVDAVIGLHVQPSISV GKIEVKYDAL  
NGSSDYLKIIIQGRGAHAA YPDTGIDAIMIAANVINALQTIVSRTVSPLEEA VLTIGTIE  
GGKRNNIIADEVTMTGTIRT TNPEVRADIARKVTALVQTIPQAFGGSGFVEIIPSYMALI  
NHNWIVDIVAEEVQRLLGKDSL VWKSKPSLGVEDFSFFLKERPGAFYHLGCGNPEKGITA  
PLHARDFDIDEACLPIGSALHA A VAQRLLAEENHK\*

>SPSA8\_v1\_320017|ID:41145787|dapF| Diaminopimelate epimerase 1 [Spirochaetes Bin 1 SA-8]  
MKQHFFKYHALGNDYIVIDPA VFNFTPTPEAVRLICDRNRGAGSDGILYGPLPGSVPAVP  
LLEIYNPDGSEAEKSGNGLRIFSLY LAEHGYRGLESFQIQTKGGLVTAQVKSLAPPLISV  
DMGAPSFDAQKAGLATDQAEFINQR LDAGSHPLKAVFVSMGNPHCVIFGEQPSPLAKTL  
GPLIESHKLFPQRTNVQFVEILSRHDIRIEI WERGAGYTLASGSSSCAAAAASRKLGLVE  
SPVTVHMPGGVLHLELADTITMTGPA VSVYDGVFSSAMLAELARLSAVPAKAGASIAAAS  
LAESGFLGANMHEEPSHA\*

>SPSA8\_v1\_320018|ID:41145788|alr| Alanine racemase [Spirochaetes Bin 1 SA-8]  
MIPRKVVAYINIDHLEHNIALIRSRIGKARLC AVAKADAYGHGALPIARALESAHVDSIA  
VAYLEEALREAGIRSPILIGITDPRNSELLIEHDIAQTIYTADSL LALDAAAARHGK  
KGRIHLKIDTGMHRQGIENLPAFLEKLTSCRYLEIEGVYSHFAEADSPQRDFTL SQIE  
KFNKGLDMLAQRGIKPPLRHIAN SAGILNYPEAYYDMVRPGILLYGMSPDGLKAPDGFK  
PVMRLAASIANIKTIEAGESVSYGRIFTASRRTRVGLLP IGYADGYARSLSNKAMVLIRG  
KRIPLIGRVCMDQFMVDLTD APEVIVGDEATLFGTEDLPAGFLTRLMGTLDYELTCGISK  
RVPRIVCRGGECQ\*

>SPSA8\_v1\_320019|ID:41145789| putative N-acetylglucosamine-6-phosphate deacetylase [Spirochaetes Bin 1 SA-8]  
MDSFILKNGTLVLPDYQIDNAV LIAQQGIIYAGAGPLEAVIRHFPEAASLP IEDCRGGY  
ILPPLVELHHGAFSVGF EQGPSAEDLVRLSVRLDAEGIGAFVPTMLWEEHAAAELVHAI  
KVSGLSPGKIPGIYLEGPFVNPEKRGGIPLQNIARPSKQLLQKILEVCDGFLAIMTLAPE  
LEGVEELYPLESAGVVIALGHSNTSGIGMKLPASRFSVTHL FNAMSGLDHRSGPGLAGY  
VLGGGKQRWAE LNADGIHVNR FAMNVASRCLDPSQLILTSDAIAAAGMPEGMFSYFGQDA  
LSDKTGVRYKETGTLIGSNRLGIELVKS FMAASGWPLHACVRAMSTNPWNLLNRAQPGLV  
PGAPAE LFIWDRDLNHCWRSTT\*

>SPSA8\_v1\_320020|ID:41145790| alpha-glucosidase (fragment) [Spirochaetes Bin 1 SA-8]

MAGLLEDMSAYFGRQVLPDWDTHDGVILGIQGGTDVCHQKLEKARAKGVPVAGIWAQDWE  
GINITSFGQRLRWDWIWNRERYPGLDSQIKAWRSQGIRFLCYANCYVGAGWTMFKEASLR  
GYLVKNQAGEDYLVDGFEFYAGIVDLTNPAAFSWFADQLVANIIDLGISGWMADDFGEYLP  
SDAVLYDGTALLAHNRWPSLWAQCNYEAVTRAGAWQEVTFMFRAGFTGSQKYCPLLWAG  
DQNVDSNDDDLPSALRSALGAAMSGHGLHHSDIGGYTTLYGMKRTKELFMRWAEFAAFT  
PMMRTHEGNRPKDNWQFDSDDETLEHLARMTKIHCALKPYLQTCEAENAARGIPVMRPLF  
LGYPEDPAAWIIDSQYLLGQDLMVAPVLEEGAVSRVHFPAGTWLDFWTGDVVYSAAAPA  
NITISAPLGTVPVVFYQQGNETAEHLAEAVKANLERRWHRAD\*

>SPSA8\_v1\_330001|ID:41145791| protein of unknown function [Spirochaetes Bin 1 SA-8]  
MSIFGNAGGRFLAMACQGQDPGVFTRDDENKSVSTERTFEADISDRITLIDELRMLADEL  
SFRLWDNKMHTGCVGIKLRFADFTSITRQRSLAVPTASADCIFQEAMQLFDANWTCGKAL  
RLIGIFLSSLVPESHIENSLFQEEPPKSALAEQVVHELQKSGKGNLIRGTRLNRRG\*

>SPSA8\_v1\_330002|ID:41145792| exported protein of unknown function [Spirochaetes Bin 1 SA-8]  
MKKIFTAILLTTLGAILFSSCMGMETAITNSGNSGTVTAEYRLSEELVNFGAIEANKAL  
LPIPIKADIENSLASAKGLKLVSWSSKSGTDTVIKTVISFDSLEALVFYLDPQGQMAR  
YSVSDAEKKIIFSLGDTMPPMDEQMKSLAKEAFAPYAFKFTVTTPSKIIRAGSSLSIISA  
ATDGKKA VFEKGKMQDIVTSGEAPVIEFTW\*

>SPSA8\_v1\_330003|ID:41145793| conserved protein of unknown function [Spirochaetes Bin 1 SA-8]  
MLLLVLELPETTSCLKDKRKKVSGIKHRLHNKFRSLSCSEVDLQDSLGF AEIGAALVSNSPV  
FGEKVLNEAVRFVEENFPVNIYESQIHSEVYG\*

>SPSA8\_v1\_330004|ID:41145794|metG| Methionine--tRNA ligase [Spirochaetes Bin 1 SA-8]  
MKRRLITSALPYVNNVPHLGNLIQVLSADVFAFRCRSRGYETLYICGTDEYGTATETKAL  
EERISPKELCDWFHAIHRDIYSWFGISFDKFGRTSTPEHTEITQSIFLDLEKNGYIVSQT  
VEQLFCDHCGRFLADRYVRGTCPVCGYENARGDQCENCGKLLDPTTELKNPKCSSCGATPH  
PKATTHLYIDLPKIKEKLEPWIQSASEKGFWANNAIQMTQAWLRDGLKPRAITRDLKWGI  
PVPMSGFEDKVFYVWFDAPIGYISMTASLAREKGFWDKSWWQNPEEVDFLQFIGKDNIPF  
HTVIFPSSLLGSGKNWTLHHMSSTEYLNYEAGKFSKSAGIGVFGTDV MATGIPADIWRF  
YIFWNRPETSDYTFTWADFKEKVNDELIGNLGNLVNRTLTFIVRYFDGTIPAGKPELFW  
SKARELESKATECLEHADLRDAFRAIFELSNLANKRFQDGEPWKTRTSNPEAAASLLSDL  
CYILKDIAIMIEPYMPAAAKKIGDFLGMKIGQDGLSWKDLGKLEGLSLVHSPEVLFKLE  
DAHIEELRERYSGSQDKRKEKQEA VEAHSIQKAEPSSAPKASSEPA AAKEKALPLADLPQ  
EERFAKLVDLRAATIVKIERHPKADKLYIETLDDGSGAERVIVSGLVPFYKEEELLGKTI  
ILVNNLKPAKLRGIESKGMMLLAASRHGEEGKEAVEVLTAPWAKPGTRIHLETTLGETLFD  
QIDADTFFSIPLEAKDGF AFAAGKEKLIIDGK PIMLEKVRDGEIG\*

>SPSA8\_v1\_330005|ID:41145795| conserved protein of unknown function [Spirochaetes Bin 1 SA-8]  
MIGESDTPVPQNLNQAADIRIDAF LA VNAENFSECGEDETSSFLQSAFWSVFKTKTGWRA  
YYCRFRLGDSHTSFPLFILCRNLALGFSLAYIPHGPPVCPESIEPGIFLSNLAKALVDKL  
PENPLFFRFDLAWDAETAQSQMLSSAEYLKLHHL SRGTAVQVPD TVLLDLRQSEEEILAG  
MKPKWRYNIRLAEKKGVS VSWSGKDQLPVFMQMYRETAQRDGI AHSSGYEYKIFEIAMQ  
FNKTLHENRADVRLWTASHDGDVLAGIITL FYRGHAIYLYGASSNAKRNLMPAHALQWAA  
ICAAKEAGCYDYDFFGIPPND DPNHPMAGLYKFKTGFGGRIVHRAGCYDTPIAILPYRAF  
MFMEKARLFWHKNVKKHFARKARQKTPSE\*

>SPSA8\_v1\_330006|ID:41145796|dtd| D-tyrosyl-tRNA(Tyr) deacylase [Spirochaetes Bin 1 SA-8]  
MRAVVQRVSDASVSIQDGDSSITGSIPNGLLVYLGVGKHDTEKDAEYLADKIANLRIFM  
DVDEKMNLSLLDMGMPALVVSQFTLFADARKGRRPSWSNAADNDTAFTLYQRFCDELGKK  
GVPVQTGKFREIMKVRYTNEGPIILLDSEKTF\*

>SPSA8\_v1\_330007|ID:41145797| exported protein of unknown function [Spirochaetes Bin 1 SA-8]  
MKKALLALFFVGSVFSLSALDIRDGLVRIRIDEINGRVLLYRMTNVSGSQYEPIFFSDP  
RTSTLMV SIDGRKARLGDSSEYKFNVRRTATGAEVEYSSV VVATITEKISFIKSLDSRVSN  
GFKVEYVIKNLSSREYKVMLRRIWDTRLGEPKGRHFSSNLSDKIEDEQVFTAESPESYVM  
TPGESASMAVLLAKVPRPDAVVIANWKRLSDAAW MYSTYMKGFSMAPYSLNDSAIGFFWD  
ERILKPGASVVFTSYLVTGGPWTEFRDALISGGYGINEDLPGVQPTETGIARKNPGLDIE  
AIRQLLALLDS AIDNIDAISESDITMLMNQVDDLLNPYEAIK\*

>SPSA8\_v1\_330008|ID:41145798| protein of unknown function [Spirochaetes Bin 1 SA-8]

MGIKKSIIVLIAVLFCSVLPTYSQKLDPEIAFAKAFDLFRQGNFREAALAYGWLFSEISS  
SDSSLAEQSA YMQLISTFNAGQYDETKILAEAYLARFPESERFVDIQYQEARIAFAEKRY  
DDAIQLFTDFITQYESIKDLQEFVVSQALFWRSESFYQLGRLTEAFSGFSALADNYPNTSK  
KNEALQRIEIIGAESRERFQRRVIDFNLKESLQMQRMEQAKEYAEQLLERYALLVRHLR  
SIYGLGQPGRLPLYANALAMPPTPAPPPPQIVIVEQSQPVNAISNLEIARNRNLKLLSA  
KQRVLSLLADRLNLYAGEVLK\*

>SPSA8\_v1\_330009|ID:41145799|rpe| Ribulose-phosphate 3-epimerase [Spirochaetes Bin 1 SA-8]  
MNRPVIIAPSILSADFSDIASAIKLIIEAGAWEIHADVMDGQFVPPISFGSKMIADIRKRT  
RLPIDVHLMVTPENHIDDFILAGADYITFHAEACVHAHRHIIQRIREAGRHPGISIVPST  
SVDSIRESLPFVDLVMTVNPVPGYGGQAMLPFCLDKVSKLKEIRSMLGLRYLVSIDGGVS  
LETAPLIASHAPDILVIGSAFFSAADKSDLAESMRNHCCTNPVC\*

>SPSA8\_v1\_330010|ID:41145800| Tetratricopeptide TPR\_2 repeat-containing protein [Spirochaetes Bin 1 SA-8]  
MAKDDSVNDLLSNGYECLKNADLATAGRFFDEALGKDYDNEEVLFAMKCNLFWIEQLEEA  
SGVEPLLERGDFMIEQWRGFQVFLARITGNSDRALYAFKRMVFSVALDFFLALPDESKKS  
LGTALDFRIGRCRKALGDYETAIKHFERAAKFKKDDARFLAELADCYAISGDQRLSKMMF  
RDAFLFEPDKVDLEFLEAGMIRKLEELAREAGHSGLAVNEWIPVYGELSGILDIKRDLSQ  
AEVARLNTSILHMENERKTYPARTEPLKPRLLNQYFRYIDYLKAAQSDSSRLEKVLLKIR  
LLEDVYKKYVS\*

>SPSA8\_v1\_330011|ID:41145801| Transcription elongation factor [Spirochaetes Bin 1 SA-8]  
MSDNQLVDK VQHMLNEEKWTRTTLNYSISSLKELDALIEEAESLNCKTELLDLCLEHLA  
NTRNSVIALYIAGIANMSKQPVEDSYMVQLMDLFAESKRTNIVEYLCERILDFGENRIAL  
ARLAECKEGEEKADEKFALWERLIKIDYEEADIVKLIKERKDKQGDRQQAIEYYKKALIR  
YIGKVLPTNVREIWQKLVEYCPQDLDFYHIQK KIASQISPDKAAMLLMDLYNHYKNLKD  
WDTALDILKILEYDEKSPAVRREFIECYSGKYAGHSRLQDYLRLSNINQSYRSLHEAIA  
EFEKHISFDIGNFVHRTWNIGRIANIQGDEVIIDFAKSRGHKMSLKMMAIDSLMPLSKDH  
XWVLKAIWKKEKLYAKVKNDPEWALKTIKSFNDQADLKRIKAEVPSVLSLSEWNSWSA  
KAKDILKTNSMFGNSADDISVFIVRDRPQSFEKIIYNQFKAEKDFFARVSYFREYIEENR  
FDSYDFTEMLGFFTA YLKT VQTAD EYVVS SYFIKELVSIDGRYAQYLT VNFTELFALIE  
DPLSVYLKIKDTELNSFVQSIKTFIPGWPSIFIKLLPYARSMKMLEWLESAGHEDLLKK  
MAMDIIENYRDHREAFIWL VKDLNEKPWFADL GIVYEKILLTLLHIVDITFKEIENHKDT  
TENKKINRIVQQLLFKDRLLLEKFL LAPDTTVQTIERVYALMMDIREIDPAVKMDIKRKA  
EKFPFSFKFGAEEKLT VSRGLMVTAKQYEEKQKLLAHIMENDVPQNQREIAFALSGLDLR  
ENAEYKAAKEKQDELNAKVGK LKTELEKAQIFDKTTVTTSKISFGTRVVLKNELSGENEV  
YTI LGPWESDPSNNVISYLSPLGK KLFNHKPG EII SFSINDRKFQYRVEKIEAADF\*

>SPSA8\_v1\_330012|ID:41145802| exported protein of unknown function [Spirochaetes Bin 1 SA-8]  
VNRILFRHIIFLALAAFLTA AVSQTFAFTLIRSSDSVDQDXASFLPPIRGIPFDELPHW  
LPEGPPIDPGEENEELLV LIAQSLTWLGT PYRAGGFSRNGIDCSGFMHTILTEVLPKGP  
FPRQSAEFAKIGKKADNIRPGDILLFAINGEIYHVGLSLSSSTFIHAASEGARTGVISS  
LYEGNWRARLFAIRRIWN\*

>SPSA8\_v1\_330013|ID:41145803|tgt| Queuine tRNA-ribosyltransferase [Spirochaetes Bin 1 SA-8]  
MSEKIFFEGHYDKNSRARTGEIHLPHGIIQTPAFMPVGTNATVKA VPPEDLQAMGFRIL  
ANTYHLYLRPGHELIRKAGGLHGFSGWRGNFLTDSGGFQVFS LAPFRKIVDEGVKFRSHI  
DGSSHFLTPEKIVDIQTA FNSDIQMQLDVCAPWGEADKKA WKAMMLTFEWGRKAKAQWEK  
AKHEGYQGKLF GIVQGNFYKELRKESAERTIEQDFPGIAIGGLSVGEPTEVFSEFLEYTA  
ELLPNDKPRYLMGIGTPDYILEAVRNGIDIFDCVYPTRTARNGLLFTSSGQITIKKALYE  
DDFSPIDPECSCPVLNHSRAYLRHL YRNGEILYSILATRHNHFLGDLVRKIRLAILQD  
RFEEFRKDFLNRYFAQP\*

>SPSA8\_v1\_330014|ID:41145804| conserved membrane protein of unknown function [Spirochaetes Bin 1 SA-8]  
MKLLMKPLRLQKLLIGSVLRRLAGGELFLVMIFLLAELFSSLWRFLASGAEVGKIFLWVA  
AGIPRHSIEVFPVAFLFAL TMSLSELQANGELMVIYSSGVSLRKL NIPVFMLAVASAFI  
FGMNEYLAIPATVQRDNL YQNMLGAKTTGFNPQDITILA QKGQVVYRCASFNPLTATMRD  
IDILERDESGAPSRILADSAIWTENRWLFSGARVFSRTQSNFWTELPGGNFSDNAFSEP  
PESFAMITKNPAMMRLMPLKNYISFLINAGLPSVEAEIEYNKRSTLLTIPIVFGLSLVF  
SGLFRKNILLMSLLFSLGTATVYYVAQMLGSLAAKSSLVSPFFGVWSITILFSLLAGLCF

YKAKT\*

>SPSA8\_v1\_330015|ID:41145805| putative Permease YjgP/YjgQ family protein [Spirochaetes Bin 1 SA-8]  
MHEKNFAPFRQNKIFLYISREFMLSLFISFCFFFVIFFINQILLMAEEILSKNVPLHKTI  
LLLFYSLPSIVTISFPFSALAGGLMASARLNSDNEFLAMAASGISIRTMYPFIHGLLS  
SFISFQSNDFLPRGTFKAFQREYGRVAKSASVELGAYSVKNYAQMTIVTGEKKDDAIGA  
VLLYPQSGTPGVSSKTLIAAGKARFISISPDQYNALVTMDSVWQQEIDTKKPNHFSISRAE  
QVQYRIKISEPIAGFSSAGPSEMSSAQIKVKITDKTANLEKRISDSRIQKSRTVRVLISA  
YGTELYSAPPEAIPVKTVKXKNNPAEAPLAALAKSTNEYRASVTALPQDRTLQIYKLEYH  
KKFSIPAAGFFSLLAFPLGLGTGKAGRTAGFGLALLSVVYWALLFAGQTLGLRSALEP  
GLAMWAPDLLVLAALMLVLRHFSSRRFL\*

>SPSA8\_v1\_330016|ID:41145806|dut| Deoxyuridine 5'-triphosphate nucleotidohydrolase [Spirochaetes Bin 1 SA-8]  
MQKLNISIPVLLDEGAALPEYKTIGSAGADLRANLAETITIKPMERVAVPTGIRIELPEG  
HEAQIRPRSGLALEKGVTCNTPGTIDSDYRGEIKVILVNLGTEAAEIHGPDRIAQMVA  
QYTKAVFLPVEAIGETSREQEGFGSTGR\*

>SPSA8\_v1\_330017|ID:41145807| putative Peptidase M16 domain protein [Spirochaetes Bin 1 SA-8]  
MLTHVSLHDGPTLLVDHRQAANSFFCSIWFPFGSRHEASCERGFLHFIEHMLFKGNIRYS  
AQEIWSLAEGSGGFLNGFTERDTLCIHAHVPKSEWQTALNLLFHMAFTSTFPICEFEKER  
NIIAAEILQTQDDIEERLLDDFFIQFWQQQPASFPPIAGSLRDIKALTRENVIEFYQHVF  
PQNAIIAVSGPVPASKITRFLERILAEISAPFDSGRVTKLCTPDLAPKPYAGRIYKKTES  
SQQFHIEAFQLDRPFGFDYYSALVSNLIGESSSSRLFRKIREEEGLAYTISSSLYHSR  
TEALLIVSAFEEENTARLLSLIDDELKNLFSEPLREKELEDHRRRLAGSFQIMLEDPEF  
RARRMARNFIDSGQVLDENEELERYLSVDMQQVKTVLMMVNQAPCMQFLYGPIGKNKAEE  
LGFLNAKSRESPECKS\*

>SPSA8\_v1\_330018|ID:41145808| polynucleotide phosphorylase/polyadenylase (fragment) [Spirochaetes Bin 1 SA-8]  
MLPPKEKFPYTIRVVSEVLESNGSSSMATVCSSSLSMHAGVPMKKPVAGIAMGLITDSE  
RYAVLSDILGDEDHLGDMDFKVAGTKDGITGFQMDIKISSVSTEILTKALAQAKNGRLHI  
LGIMEATMAEPASDISEYAPKVVAKVVDQDKIGAVIGPSGKNIKAMCEKFDVQINIDEDG  
NVTIYGKNQKSAYEARDAVLGMVEEPEIGKVXKGTVKRIMDFGXFIEILPGKEGLAHISK  
LSKGRVEKVTDVVKEGDSVEVKLLEIDHMGRLNLALVGALDENGNA PASAPRPDSRPRDP  
RRFSDDRRDSQHRR\*

>SPSA8\_v1\_340001|ID:41145809| Chromate transporter (fragment) [Spirochaetes Bin 1 SA-8]  
VPGLVAAMVYKSAKKRSWNVLRAAETMILAILLALFPTLSLPILLGGIAFLYGIETVCTR  
H\*

>SPSA8\_v1\_340002|ID:41145810| Chromate transporter [Spirochaetes Bin 1 SA-8]  
MHETLTLVWTFKVGIIAFGGGWSTVGIKNAVVPWTWINESEDFRALIAIAQSTPGPIALN  
AATMIGWSHGFFISAILSTLSVVAFLMAITATLLTGKIKLNQGALDLSLKTGSLAMML  
MTLWVLKPVSLDPLLLVLMLGAFYISAFTKINALWAILGSGAINAAGPWIRGLFGG\*

>SPSA8\_v1\_340003|ID:41145811| conserved protein of unknown function [Spirochaetes Bin 1 SA-8]  
MIYPNQPNVREPCTAVRVDRLTTQEHENALSFYSLAALCTSGNDTACVTLLAGAGTRW  
VASLKTSGMDFSPADMPRGLYPVENFIGGNPHKVPLAAYSMDAVRNLGEQVIVIRGWQR  
EIEQQVLEPLGIDSRTVAFVTQLPGPNGKVAGHGDAIWQAQEAWMNSRYVITNFGGDANS  
PITVRAGLAMIKMLDEAGIEIGLLLVALQKNPAYPVTLDESGLPVSFHGNKLGGGPSAM  
VTANPQHADGSAYTNVGIIRYKDWLLRAISEIRSNFWSPDASYEIPGNDPAGHEFALDN  
VDAWLASKHMARIAAIANPEELTPAKSFSDIGKFEAAVREVRKEWDMFLSLQKAL\*

>SPSA8\_v1\_340004|ID:41145812| putative ABC transporter permease [Spirochaetes Bin 1 SA-8]  
MNIPHYPEFAPIDLKMKDAMHPAFNLKDGISEFTFANLYLFRHVYHYKVSMLPDKGIAI  
SGIKEGKSFFYLPCCFAPPSIFDDLMDKHDYMKNLSESQAQAHNRINLEGRGYLVFEDRDN  
FDYLYYRKDLAELSGREYHKKRNLVNGFVSNYVCEQRPLKKNVQDALAVLEEWRESKGI  
EGDYRAAREGLELFHELGMRGAVFYIENAPVGWCLGEAVAKGKMFIAHFEEKACDRFKGIY  
QFINQAFASLPEYFKLINREQDLGEEGLRQAKMTYRCPDFVRKYRVIHPDKKEFKPHDI  
SEPAECGPGTMHSCEG\*

>SPSA8\_v1\_340005|ID:41145813|pepT| Peptidase T [Spirochaetes Bin 1 SA-8]  
MIMKNHNQFLSKPYVDGMVERFIRYVKVDTQSDRHIEDIPSTKGGQWDLAWMLESELKALG  
LADVSLDNHCYLIARVPASPGMENKPSIGLMAHMDTASDVSGANVKPTLVKDYQGNAIL

SAGYMLDPKNYPDLTEHIGDTIITDGTLLGADDKAGVAEIMTAVEYMIKHPEIKHGPI  
EIFFTPDEETGKGMDFPLTKAKSTACYTFDGGKAAEIESECFTAYSVHAEFSGQVIHIG  
AARGKLANAVAMAASFVNLLPRSESPEATDEWFGYYCPIEINGSLEHAELDIYLRDFTSA  
GMERRIEAIKAFKTVQYPLGKVSLETKKQYLNKMEELDKHPDVLNLVKAEMTGAE  
HGMRPIRGGTDGSRLEMGIPVFTGGYNYHSRYEWASVSEMSLAVQTLNLVQCWI\*  
>SPSA8\_v1\_340006|ID:41145814|atoA| acetyl-CoA:acetoacetyl-CoA transferase, beta subunit [Spirochaetes Bin 1 SA-8]  
MEYVENKEIARRIARFFKGTGNVNLGIGLPTLVANFVPAGETVILQSENGLIGLGPAPD  
ADHVDKDLINAGAQPVTLLQVGGCYFDSATSFGIIRGGHVDFTVLGVLEVDQEGNLANYKI  
PGKLVPGMGGAMDLVAGSKKVIAATTHFEKSGSSKLRRCALPLTAQKEVDYVVTDLGVF  
EIKNNTFVLTIFYFAPYTPEYIVEKTDADVVSSEHCKLSDI\*  
>SPSA8\_v1\_340007|ID:41145815|atoD| acetyl-CoA:acetoacetyl-CoA transferase, alpha subunit [Spirochaetes Bin 1 SA-8]  
MIAKPMISPOKAAELVQDGMVVHVGGFLGCGSPERIIQALLERGAKNLTLVCNDTAVYDP  
KTGRKNGVAPLVAKAFSRVIVSHIGTNPETQRQMNAGEMIVDLVPQGTLAERIRAAGCG  
LGGFLTPTGVGTEVENGGKQKFEMNGRTYLLLEPLKGNIALLKARKADKAGNLVYSKTARN  
FNPLMAMACDIVIVEAEEIVEIGSLDPDQIHTPSIFVDYIVQA\*  
>SPSA8\_v1\_340008|ID:41145816|kamE| D-lysine 5,6-aminomutase beta subunit [Spirochaetes Bin 1 SA-8]  
MAHIVRPYGDTLDDGKQVLSFTLPVPHGLKAQEAARIMVLGWGFSDCIEIVHSARISDNFT  
FFVAYAKTERGVYDAVEADRNEEEKSMDEVNEFIRTHIGRQVVGACTGFDAHTVG  
IDAIMNMKGYNHHYGLERYSMMEAHNLGAQVPNERLLEYAVKVKADAILVSQVVTQKQDTH  
IHNLTNFIELLEAEGLRKSKFICIVGGPRISNKLAVQLGYDAGFGRGTYADNVATFVVKKL  
AERMEL\*  
>SPSA8\_v1\_340009|ID:41145817|kamD| D-lysine 5,6-aminomutase alpha subunit [Spirochaetes Bin 1 SA-8]  
MKEKLGSLKDKIAEARERAIAICAPVLDIFIHEHTSVTVERATLRLGADGANADGVPVPN  
LVVDSLRLQNLSEGAALRYANALVVKGMTPQELNSAIASGLDISKIPLGDKAFARVKAQQL  
AQAHLDRIIRNRGQREKLAEFAGRNNSPLL YLIVATGNIFEDVKQAQAAVLNGADVIAV  
IRTTAQSLLDYVPYGATTEGFGGTYATQENFRIMRQALDEAGEREKRYIYLNTNYASGLCM  
PEIAAMGALERLDMMLNDSMYGILFRDINMYRTFVDQKFSRMINAYAGIINTGEDNYLT  
TSDAYEKAYTVLASQFLNERFAYAAGLQAWQMGLGHAFEMDPSIPNGFLYEFAQAQMARE  
IFPEHPLKYMPTKHMSGDIFKGVMDNMFNFVSKATGQGIHLLGMLTEAIHTPFMMMDRY  
LAVDTARYVMNNIASFGDDIEFKKDGIMVRHAHEVLDKTLFLREVEKTGLMDAIAQGLF  
AEVKRPKDGGKGLEGLLAKSPDYFNPVESLLEELGIL\*  
>SPSA8\_v1\_340010|ID:41145818| protein of unknown function [Spirochaetes Bin 1 SA-8]  
MQQSEKTALPAHEATSAWTFADMDVWVWHEFKPLTPYGKDYVYARTVHTDPLLLGEIYDDT  
EQMAKFHESRTKTSSEQEKLAWHLSRIPRLPAALDDSLDIFLIKKFLSNYRALGESLDEE  
SRKRFGFVIFYSHALLEELNKGSDSETFFIASSYDSELEAVRIGIREISEKLAQNRKESE  
ERITRTWGVDFKNREFLTPAELAVKMSAQAGQAGCPAIAVESFDDSYCLIRPLPDEAAL  
ELQRQHAMLREKEAIRERAVLQKLFEMVGAELDNLSTYAKVVERLDLARARYLLKKKYGL  
QKPDFDAQVMDIREGRFIPLEKECIAASRRYTPLSMRSEKPVAVLFGSNMGGKTIVLRTV  
LFLQLMAQTGLGVPAEVRTRITRYTSIRYVGDNGQDLQKGLSGFGMEIHALADIETAKRG  
ACLCAFDEFAHSTSSDEAEALLSAVVAWFSRNPENRMLFATHFRRIARTSGADYYAMAGL  
DVMRAVQVIRDSL GADSAGKEKNLIERIRMINEMMRYVVCPEKSIGKSADAPLQETESGN  
GSDALAVASLLGLETEIHLATKILKEKHA\*  
>SPSA8\_v1\_340011|ID:41145819| protein of unknown function [Spirochaetes Bin 1 SA-8]  
MLPGAWLFDVSVNLVTGPGAASGKTTFARNAIAALHAQNHSVAVLAVGLEGDRTARIAAG  
ASAGLPAGAGWGKRALAAASQFSFQPGDVFLTTSAYLEAACDQPEILDVLPSSALGRLA  
LARARRGGSAAALVGPEHNEYLALAVSRILDNQWASTIFIDGALNRITQAASVSNAQLFYS  
ARVSRSECKSLIDKMRYLLDLLSLPVYQPDTHADKAVFIDGALTDSSAERLRNSDEII  
VVRDFSSIFLDPQAFRRFGGSARICVRNKVHFGGFSIILRSIQKDEFEQLAGPELTKIV  
SWNTWEGGENQNAE\*  
>SPSA8\_v1\_340012|ID:41145820|kamA| L-lysine 2,3-aminomutase [Spirochaetes Bin 1 SA-8]  
MHEYPSYDYRRIPLFKNVSPPEWNDWHWQMRHDIRDVETLAQVIPLTEKDKSDISEVLKI  
FRMAITPYASLIDPSNPVCPVRLQAVPRLPETRIDASDQDDPLHEDVDSVPVGLTHRYP

DRVLLLVTNLCSMNCRHCTRRRLVGFEDVHMSDENIDAAIEYISKTEIVRDVLSGGDPF  
TLSTERLEKIISRLRAIPHVEIIRIGTRTPVVMMPMRIDDQLVNMLKKYHPIYVNTHFNHP  
KEITAEAKAAACEKLANAGIPLGNQSVLLRDVNDPCVLMKKLVQKLLTIRVKPYYIYQCDM  
SRGISHFRRTTVSKGIEIENLRGHTTGMAVPTFVIDAPGGGGKIPVMPDYLITSNEKRVI  
LRNYEGVITTYDEPHFYEEDCGQCRCIFDEPWLPKPTCGVARLLDGQEKVLEPKNLARVAR  
SHHHDDV\*

>SPSA8\_v1\_340013|ID:41145821|kce| 3-keto-5-aminohexanoate cleavage enzyme [Spirochaetes Bin 1 SA-8]  
MAKMVITCACTGAETTKAQNPALPVTPEEIAEAA YEAWRAGAAILHLHVRDENGRTQNP  
AVFKKAIDRIRSKCDIIVEITGGAVGDTAEERLRPIMELEPEMASLDCGTVNFGNDYIV  
NTLPVMRKFAEEFKRHRVQPTLECFDLGHVYASHILINEGLLEPPYHYGLVLNVPGAVPY  
SADNLEVFKRALPEGANFTVMGIGRASLPAQYGAVATGGWIRVGFEDNVYYSKGVLAKSN  
AELVERAVRIAREAQFEIASSDDVRKMFNLKG\*

>SPSA8\_v1\_340014|ID:41145822|kat| 3-aminobutyryl-CoA aminotransferase [Spirochaetes Bin 1 SA-8]  
MPAQEYPKLKLDESMRLFQAKEVCPGGVMGIRRPYNFIQGEYPIFIDRGYKGHIVDVDG  
NDYIDMLCAYGPVILGYDEREINDAVKAQMDEKGFCSLVQKVQNDLEERLTHIIPCAEQ  
VILVKTGSDATSLAVRIARGYTDRKYVLRGCGYHGWHWCVEVHGGVPEEITNLVFEFYG  
SLESLESALQAHEGEVACVIVTPVGHPLAKPVMAPPAGYLEGVRKLADRYGAVLIFDEIR  
TGFRAALGGAQERYGVTPDLGTFGKALANGYPISAVAGKREIMKVAEQKVFVSSTFFPNS  
LEMVAAMKCLDILEREKVPDSIWQRGTVFLEKLRKIAENSGPLTVSGIPMPFLTFDKS  
EKDGEKTYKARREYFYTQTIIRGLFIQPYHHWYIAHRHTDRDLDYALGAISEALELTAKK  
FPIGR\*

>SPSA8\_v1\_340015|ID:41145823|kdd| L-erythro-3,5-diaminohexanoate dehydrogenase [Spirochaetes Bin 1 SA-8]  
MPMGDKYGTNRVIEPAGAMPQTAQKLDNDMSKLYDNEILVDVIALNVDSASFTQIEEEAG  
GDEAKIGEIMNIVKTRGKQNPVTGSGGMFIGKVAKIGSALKDRDLKVGDKIASLVSL  
LTPKINRILAVHKEIDRVEVDAQAILFESGIYAKLPEDMDEGLALAALDVAGAPAQAAK  
LVKPGDVTVLVLGAGGKSGLLCCYEAMKRVGPTGRVV ANIHSARSRGILEELHLAHEIVQA  
DASKPVEFLNKVLPANKGREFDISINCVNIQGCEMASILPVRDGGIVYFFSMATSFTRAA  
LGAEGIGKDVTMIIGNGYTKDHAETLWELRENPALRKKFFETQYVK\*

>SPSA8\_v1\_340016|ID:41145824| conserved exported protein of unknown function [Spirochaetes Bin 1 SA-8]  
MKNRTVFLLCVFLIAAGSSAWAQLAFGVTGSANGSTNASIDDFKDRFERGEGIFYGGFVE  
LGMRNLCGLTSGWKSSYSVYFGGSDLTPMQDLMTYTYAQGHLFSYKAFLDPFFEVGFGKF  
KADYSNSNDDGDKSNPLKASRFINAGGGVGLNFGHIGIFLKVLYAMPFGQPVRDSTNSYN  
LEAYSIEPLEVFIGTKIIL\*

>SPSA8\_v1\_340017|ID:41145825| exported protein of unknown function [Spirochaetes Bin 1 SA-8]  
MRKRILTMLLVFLAGTSMVFAQSKTSLNIQSNQVGAKVYLNDNLAGYTTPNFSALVTPGL  
YYIKVTKDGFDFKTTVVVGSTPITITANFGPSQPPSPAPPAPVQHQLSVDSNVRNAH  
VYIDKAFVGTTPFVGFYKPGYYTITIRVPGYEDYSQKVNLTSFELYATLNLPLPVYFD  
VNNVRGASVYRDGQFMGTPPYSGSWLPGSYSLRV SAPGFADYNERVALSGPLVMQISLAP  
LLVDYEURVPDYFMTIPGSPMYRNLQLYLDGRRVDQLYGKALPGRHVLTVFINDLKLEA  
EFELIGGKPAVIEPFFGIRVQ\*

>SPSA8\_v1\_340018|ID:41145826| protein of unknown function [Spirochaetes Bin 1 SA-8]  
MSDFISLQEFERSASIAGIFKGEIDLLHETLLSWKSSPSKPYTVLELRDGGKTLAAYAI  
CKITGRDSTYDIRYFVDRDYRHTEGSKHLLALIDQELLYKAYPYAVIRAEPSTRKLIGL  
EKTLEEAGYRLIGHIKDYHGEEDDYFYFIHVA YRNKPVFEKPELNIDSN\*

>SPSA8\_v1\_340019|ID:41145827|gmuE| putative fructokinase [Spirochaetes Bin 1 SA-8]  
MRIGAIEAGGTFKICAIETEFQGDGWSKPLIKESISIPTAKPEVTLQACLGFSSAEPI  
ERLGIASFGPVELDPLSPQYGFITTPKPGWKQTDIVGFFKKTLPVFFD TDVNGAVLS  
EHRWGNRGLSDFVYITIGTGIGGXIMANGRLIHGAMHPGELGHFLPQKHAQDNFAGVCPF  
HGACLEGLASGPAIARWGIPGEKLDNHPAWELEAYYLAQVSAMLAMTLSTRRILLGGS  
VGMREIVGKTRKILSTVLAGYLSWLESPEAVESFLMNPLLGSQAGILGAAALTLD\*

>SPSA8\_v1\_350001|ID:41145828| protein of unknown function [Spirochaetes Bin 1 SA-8]  
MTLLGRQPSEPNLALLFDLQRTLTYPDLDGRGVAVCVQKIAEAFPRLNIMAGLEESDSSR  
IGKIFGEPXX

>SPSA8\_v1\_350002|ID:41145829|asd| Aspartate-semialdehyde dehydrogenase [Spirochaetes Bin 1 SA-8]

MGLYRTPANSPRNFHISFAPSTDLEGSANSIALLEKNPLVKPYLQQGKKIPVTILGATGV  
VGQRFLRRLANHPWFYPAFLAASEKSAGRRYDEACAWHLGDGEPWAGMGAVTVTACTPEEA  
YAPIVFSALDAEPARQIEPLFAQAGAYVFSNASAFRMEDDVPLLIPELNPDLAMLGYQR  
KKRSWKGAIVTNPCTTVMIASALAPLEKAFGIEAVIVTSLQAISGAGYPGVSAMDITGN  
VIPFIKNEEPKVEIESNKILGRVAALGEKMEFVNAPFAMSATCTRVPVLEGHTISISVRL  
K GKPTLDEVRSALQNFVPATAGFELPSAPEKFLELNPLENRPQPRRDAEKDGGMRIIVGR  
VRECPILGFKLVSMGHINTERGAAGASVLNAEIALAMGVXQ\*

>SPSA8\_v1\_350003|ID:41145830| Aspartokinase [Spirochaetes Bin 1 SA-8]

MNTAMERTERPEADRPLVMKFGGTSVGSAQRMKDVAVLARVNAQNGVLVVVSAMSGVTDS  
LFRAARLAFEGNLEAANAVCEDLRKHYETHRELSRPTETADEFAYIDEIIDALKERLHG  
VALLRELSRSMDAIASSGELLSGQLVARAIGCRYIDARPLMKTDSRFGEARPDMEAIKA  
AVNEHVAPLMRPWEIVVTQGYIGSDQENATTTLGRGGSDFSASIFGAALGAREIQIWTDV  
EGILTCDPRIVPNAKTVEVLGYFEAAELAAFGAKVLHPATVKPALDAGIPVTVRNTMKPE  
GKYSTIKPGKSSGRPVVALAMRKNVTIISIKQEDMTDQYGFLAKLKFVFGDAEVSVDLIS  
TSEISVSISLSSSPLPKLKKELQKLGAVDVLSSRVVIAVVGDLLKRTPAVLNKVFTVLE  
QIEVDLVSLGANSVNLFSIVKQEDADEFAMKKLHEVFF\*

>SPSA8\_v1\_350004|ID:41145831| putative 4-hydroxy-tetrahydrodipicolinate reductase [Spirochaetes Bin 1 SA-8]

MKIGIFGAGKLSGAISEEVRLTKSVSGSKPEIVWVVDQGDSVPPVAVDVAIDASTGSAVM  
EHIQWAIDTRIPLVVAATGWSIPNLPELVSDKTGLLVAPNMSIGVAFMKRMSSIMALLAD  
LDSSGELSIFEHHHSQKKDAPSGTAISLANACVQASSRYKGWTAGPAEPSSISVVSLSRG  
AEPGYHQILFDSPLETLTLSHRARDRRVFAKGALLACSWILGKKGVFSMDDIVESLIREG  
GVSNA\*

>SPSA8\_v1\_350005|ID:41145832|dapA| 4-hydroxy-tetrahydrodipicolinate synthase [Spirochaetes Bin 1 SA-8]

MSMEAIMDTAKALNGLGVAIATPFFPDGTVDYQAFSRLMRFLAGKAPDKQGSPSAKPDGS  
SRGVFAGQWDSFWTNESSGANFLVVLGSGEGATIEPDERRKLIIQTAVEEKTGLPIVVGT  
GSNSTAASVRLTAEAVSLGADAVLVVVPYYNKPTPEGLQAHYKAVAEAAAGRPVIVYNVP  
GRTGLNLTPAVLQKLWQIPNVTAVKESGNLQIGEIARTLPPGKILLSGDDYLALPSIS  
LGAEGLVSVAGNVLPFRFSALVEAARAGRRAAMKLQHQLLPLMDSLFLSNPIPLKAAL  
AMLGLASDFVRLPLFPAQAGTRQKLEGALTAILETGQK\*

>SPSA8\_v1\_350006|ID:41145833|dapD| 2,3,4,5-tetrahydropyridine-2,6-dicarboxylate N-succinyltransferase [Spirochaetes Bin 1 SA-8]

MDIEAIQQKLAEEAPVSEDVWEAFLAGLESGEISTVTRDESHTWHTNVWVKSAILKGFRA  
GGMKPPFWPPSLGLGTFENPDFFDRPAFPRAITQEDGIRMVPGGSSIRRGAYVARGVVI  
MPPAYINVGAVHCEGTMVDHALVGSACWIGANVXLSAGVQIGGVLEPPQAQPVIHEDGA  
FIGGMCGIFEGILVKKNAVLSAGVVISRSTKIMDLVNEKEYYGVPENAVVVPGSRPASG  
PYAQLGIGIQTPCIIKYRDEGTSAAVVLETALR\*

>SPSA8\_v1\_350007|ID:41145834|proC| Pyrroline-5-carboxylate reductase [Spirochaetes Bin 1 SA-8]

MKFKLGIIGAGKIGEIVAGVLAKGLYQPQDIVLSVRTENHKEDLEKRLGIQSTLDNVFV  
AQNSDIILSVKPKAILEVVNQIQSVLKPGNLLISTAAGVPLELIESRVPEFVSVIRTMP  
NLA V SIGEGMTVLSGKNSPGNKTMAEQIFASVGNALFLEEQHMDAVTGLSGSGPAYIY  
IIIESLADGGVKLGLPRDVATQLAAQTVLGAAKTVLLSGEHPAKLKDLVTTAGVTIDGI  
LELEEGGLRVTLIKAVVKATERARQLLHKA\*

>SPSA8\_v1\_350008|ID:41145835| protein of unknown function [Spirochaetes Bin 1 SA-8]

MVHLFIVQGPRQSGKTTFLCGLYNSARLSGISVYAVIEENERDSQGIPISLVFHTLETGA  
IRLLAERESSRPPYPPFQFRQDVFDAVLDELQRASRTRDLVIIDEVGPYEILEQKGLWPF  
RDLPTDRRLTLAIGIRPDLVDSLLLALADWNVPYKLEAILPMAQNETPTKQFADTITACC  
QSISLDL\*

>SPSA8\_v1\_350009|ID:41145836| protein of unknown function [Spirochaetes Bin 1 SA-8]

MIYWNRDLAARLKCPEKEKQQLPTFIKKLMVYIEKIHESGVSATFPNVERPLFPYFYQGL  
SLIMDNLSTESIEEIMAVYLSVSQESGLQFLKQCIETEAVLSLASGDTPEFTFRKIVPYA  
GIEQADWLIQSAANKGTL\*

>SPSA8\_v1\_350010|ID:41145837| protein of unknown function [Spirochaetes Bin 1 SA-8]

MLMQRLYRLQSLFNLIQKTESGAGAETEGPSSISFPPVQKSEADQLMAXAKVFXGYIATL  
REKGKEAFGKAIADKRRKLFCLRILLESQPTVNLQQSFLSGGMLXARDAHEALETAMY



FQGTSSALKNSHPAVVLKVMASAFGLVEASAQADEWIAERYKHRSAL EEELILPGDMPDII  
LSNLGNTARLERTIRLAGPQLAGTALSGCPREILSQLEHRIFSTCGTILLHHDIEVARAD  
YSSDEIADAQNAFMELLETKISEMEETSGMIEPEKQKMPQDPLL VADLSNLMETEEL  
LKDILIKLSPQAI AVIVQGV EAAHDRIFSTLPAGKARRVLDAL EAS TGIDTLTLTRNAQ  
IFAQQILSEISQHHKITAKQLPITGRLRQLLSAILSRE\*

>SPSA8\_v1\_350011|ID:41145838| putative GTP cyclohydrolase 1 type 2 [Spirochaetes Bin 1 SA-8]  
MVSLLPWKALLYSIFMDIREFDQWCRSFLKIDDLV GIDDSLNGIQIGRSLAPVRKVAFA  
VDACQESIQR AVQAGADVLFVHHGLFWGKPERIEGSLKRLK T ALDADLALYACHLPLDM  
HPEVGNNAVLSSMLNLQNRIPFGIYHGIPIGFSGLPSPLSLEEIRK KLLPDNSSPRLVI  
PGSRKLIETA AVISGGAPFESFQAISKNI DLYITGEP SHSIYHQVVENGLAFM ALGHYXS  
EVWGVKAVAXKLTQEKS IETFFIDLPTGL\*

>SPSA8\_v1\_350012|ID:41145839|lspA| Lipoprotein signal peptidase [Spirochaetes Bin 1 SA-8]  
MNDSTITLQRRSLPFLVSFIILADQISKAFIVAKIPVNTIGSRL LGDFLWIVHAKNLGI  
AFSLGDSFSQLIRVALFIILPLGFIGFGIAYCLKTEKLSTFQRYAIAVIIGGGLGNLIDR  
IFRADGVVDFISLKFY GILGMNRFPTFNVADSCITIGALLL FASGVLWSPA EETER\*

>SPSA8\_v1\_350013|ID:41145840| conserved protein of unknown function [Spirochaetes Bin 1 SA-8]  
MKVEKKTALALFVLGASAFNIITAGIFLALLALYSLTF AKILSPEFLMWAVVGA FVISL  
VLSVLIYKKVLNWAR KKYDL DARLGLK\*

>SPSA8\_v1\_350014|ID:41145841| conserved protein of unknown function [Spirochaetes Bin 1 SA-8]  
MNNMSRRFMKVGVTLP RILIPAESIDRRSWAVVACDQFSSEREYWEKVARTVGD KPSTLN  
LIFPECYLEDSKNERIAAIRASMKTYLERDYFTELPEGFML VERHTPYEEKPRVGLMIA  
VDLEQYRYGKDSKSLIRPTEGTIVERLPPRMDIRRGAALELPHIMLLVDDPEKSVIEPLY  
ASRQYLPKVYDFDL MENSGLRGWHVSDTRYLEKILSAMEKLADPSSYKNKYQQDEVLLF  
AVGDGNHSLATAKAIWEETKKNLQAGLPDHPENAQLLENH PARFALVELVNIYDEGLPFH  
PIHRVLFKANEAE LIGIMEKAGAVVRRRTTSYEQAFKLADAPQEGKTQTIAFVSAADSGVL  
VFEQPKSKLAAGTIQEILDAYLKAHPETSIDYIHGEGSLVALAQKQGNFGLYLPPVDKSS  
FFGTVIADGVMPRKTF SMGEAPEKRFYMEARKIQP\*

>SPSA8\_v1\_350015|ID:41145842| D-isomer specific 2-hydroxyacid dehydrogenase NAD-binding protein  
[Spirochaetes Bin 1 SA-8]

MTILLADAFAPDLPGR LAPFGNVTADLKQLPEAEVLIVRSKTKVDKAMIDAAPKLKYIIR  
GGVGVDTIDVEYAKTKN ILVDNTPEASSLAVAELAFALMLAMPNHLVQADNSTKEGKWLK  
KELERTELNGKVLGLVGIGRIAREVASRAKAFGM RVVAYDKYVPSSEAAEMMSLDEVYTQ  
ADYISLHTPLTEETRGMINNESIAKMKQGVR IINTCRGQVVVEEDLVAALVSGKVAGYAA  
DVFYKEPPADSPLLKAPNVLLTPHIGASTEENLLRLGDSIVARLEKYTASK\*

>SPSA8\_v1\_350016|ID:41145843|serC| Phosphoserine aminotransferase [Spirochaetes Bin 1 SA-8]  
MNRVINFNAGPAAIPLDVLKQAQEEMLDWNGTGMSVMEVSHRSKEYEAMHNEAQDLFRKL  
AGMGPEWKILFLTGGASTQFFMIPMNFLHSGRKATYLVTGNWSKGALKEAKRFGTCDAYT  
TENPDGTFTRILKPTFEFSIDPNSTYAHMTSNNTLFGSQWHYWPETGSVPLVCDMSSDIFS  
RPF PADKFS LIYAGAQN LGPSGVTVVAVKDSFLQLAEEQAKLPTMLS YRTHDDNNSLYN  
TPPCFSIYILSLTLKWL DKNNGGLEAMQKINEEKGR IYNAIDASNGFYRGPVEKDSRSLM  
NVVFRLDTVEKEELFVKEAKAHGIVGVKGHRSTGGIRFSMYNANLVDNVAKAAQFMEDFR  
KKYS\*

>SPSA8\_v1\_350017|ID:41145844| putative Transcriptional regulator, LysR family [Spirochaetes Bin 1 SA-8]  
MDIVKLRAFLTVAKLKSISEAARELN YTPAVSAQIRDLESILGISLFEKSGRKLRLSEP  
GRIVLPYVERLLRDYDLINAAIPQALDSSRAYLRIGASSLPGVHLVPQLLADFGRSFPDI  
CISLSIEKANRIERMV LDRQIDVGFGRKVQYAPRTHLNEYLVK KDNLV AIVSSTHPLAG  
KKSISLDELSRIPLILPHRDV LTRRSVEERFHQLGYSVDLAFEVSNTEAIKRMVACNLGA  
SVLCQSSVQKEVEAGWLSALLVDEL DLSRFIYIITRKTEKIPPLD DDFIQFAIASFSGNL  
\*

>SPSA8\_v1\_350018|ID:41145845|mdh| Malate dehydrogenase [Spirochaetes Bin 1 SA-8]  
MSEDITWWSFDEVEAFMKAGFEAVGVPSEEAAVCANVLIAADKRGVDSHG VGRYKPIYLD  
RIWAGILNTKTNFEVVRETPTTAVIDGHNGMGHYIAKRAMDMAIEKA EKFGIGMTVCRNS  
THYGAAFYYARMAVEHGMIGLTTT NARPAIAPTWGVEPMLGTNPMTWGMPTDEDFPFMLD  
CATSVTQRGKVELYDRLDKDLPDGWVIGQDGKYRHDTKQVLVDLTRDLAAL TPLGGLGED

MGGYKGYGYAMVVELLSSALSQANFMKALSDLGPDGKKKPIELGHSFLAININAFCDLED  
FKHHVGEVCRQLRASKKAPGAERIYTPGEKEHDVWLYRKDKGVFPNAPLKKSFKEVKERC  
KLDIELPF\*

>SPSA8\_v1\_350019|ID:41145846| conserved membrane protein of unknown function [Spirochaetes Bin 1 SA-8]  
MGKAGWGLGISLVASVAGGFIGIILILFSKPLAAVAVKMHPAEYFMLAVFGLTTVASLG  
GKNGIKAFAAALLGLLINTIGLDPISGVKRFTFGQVNLFDGDFIPALIGLFALSEVFSR  
LEEGFSKEKIDYKLEKKKEQWPTLKDYWKLRRTVQSSVVGTLIGIFPGAGSAIASFVSY  
DLAKRTSKTPETFGKGNPEGVAAAEASNSASVGGAMVPLLTLGIPGSAATAVLISALMIH  
DLVPGPMLFANQPVLVYGLFASMLVANIIMLIIGALGSQWLKIVTRIPQQLLIPLIISIA  
VVGSAFAVKNSMFDVFCIGFGLVWILKRHEYMPAPIVLGMVLGKLAEANFRRAVIMGGY  
SIFTRPASVLLVLSILSMALPLIQTYRDKKKA\*

>SPSA8\_v1\_360001|ID:41145847| protein of unknown function [Spirochaetes Bin 1 SA-8]  
MDSCAHGVDALRNAYHRHRETACTGSILSTASNSRHKSMGYLCRTDRRRYKAVKEEALRF  
ALRTADPTGRLNMLREYIQAQALRSLHESRAFEALS FVGGTALRFLFDLPRYSEDLDLDFSL  
EIPENYFPDAWMAKLRDLEFQNFNVEMSWNSTKPVHTGWIRIASVMKDAGLSSRPEQKL  
SIKIEIDTNPPAGAATMVRLVNXX

>SPSA8\_v1\_360002|ID:41145848| conserved protein of unknown function [Spirochaetes Bin 1 SA-8]  
MKLERLLQAFAGQPYFDYPAVRLHFQSESDHTSRTALS RFAKRGILRELKRGYAFSEPY  
RSQPLNPLQIAQALYSPSYVSELWALSWYGVPEKVTLITSVTTRATRIFKNALGEYR  
TIDGRFFHSWQTVEILSAEVRIATPEKALLDLWYLEKGEWTAARMESMRFETRIIDTGKL  
HVLAQSCPPRLIRAIKAWAIYAGQTEGGTKL\*

>SPSA8\_v1\_360003|ID:41145849|BglA| Beta-glucosidase A [Spirochaetes Bin 1 SA-8]  
MKRTDGFDDFIWGCATSSYQIEGAAQEDGRGVSIVDTFCHTPGKVAEGDTGDIACDSYH  
RYPEDIALRELNANAYRFSTAWPRIQPDGSGKPNPKGVAYYDKLVDSLLEAGIEPVMQL  
YHWDLPQALEDRGGWANRETA FRFQFAEIMFVHFGDRITHYSSLNEPWCSAYLGYREGA  
QAPGKRDKVLANRAVHLLLAHGLAQKSYRATGLSGKFGIVINPGRQRPATARPEDYAAA  
EIASIESTRIWLDPLYARGYPALFTQYFGADLPIVDGDM EIIGSLPDFLGVNYYFEHVVK  
AVSADERNPFGVALAGTWHEKTAMGW DIVPEGMLRLLRYIAGNWPISNLVVTENGA AFDD  
VPDADGVVHDKERIEYLAHLQACRDAIAEGIPLKGYFLWSLLDNFEWAYGYRKRFGIVR  
LHPETLNRIPKKSFYYYRDVIAGFGL\*

>SPSA8\_v1\_360004|ID:41145850| Auxin Efflux Carrier [Spirochaetes Bin 1 SA-8]  
MFTALQSVLSVILMIGLGFVLARKKWFEQNGQTILSRLV VNIALPTYMISNLMGGYDRVK  
LLSMVPGLPPIFGIMIASYLIAMLLAVLFKVKKTRRGAFQSMFALSNAVFIGLPINILLF  
GEQSLPFALLYIANTTLFWTIGVYGIARDGALRTGRPAPSLVSISGLKRIFSPPLLGFL  
IAIVLILLEIKLPKFVMDTCKYLGNLTPLSMLFIGIV IARVDWKKLKFERYDYL VILAGR  
FLLTPLMMFFLVRTMDLPLLMKQVFIMQASMPAMTQNPIVAEAYQADAEYAAIGTSLTTV  
ISMMTIPVYMSAILVLI\*

>SPSA8\_v1\_360005|ID:41145851| Trp repressor [Spirochaetes Bin 1 SA-8]  
MSRNPPELMMKHNAIEIAKALEGADANLIESFLY SLLTPAEADEMAKRWALVKELA QGTAQR  
KIAEELGLSLCKITRGSRELKKNENSAFRILLNKLDEASA QDPKKQ\*

>SPSA8\_v1\_360006|ID:41145852| protein of unknown function [Spirochaetes Bin 1 SA-8]  
MELPLRLKCLKDGLIYGISPWFVMNGVFVALIAA AFLMNDIPMSVLAWILEVGLALGV  
LYEENWKADAAGKRLVHKGGVYPIKSTPVDFSEIEHFLLEALARGTVPGSSEERDDKAR  
AQTMMNGGSDERNAPGGMFARNLRRKPFVNLILQ TRSGEAYLIDSLPARKAKRLEIAGTA  
LADSCGCQLEKDF\*

>SPSA8\_v1\_360007|ID:41145853| AzlC family protein [Spirochaetes Bin 1 SA-8]  
VPFEASGKARFGSIFTAAFASVPVLLGYTTIGFAFGL VLTGAGLPWWLSPVMALSVYAG  
AAQFMGVGLMAAHAGIAEAALLTLLMNARHAVYGLSLLDEF SKAGKAKPYLIFGLTDETY  
GLLTTVKPPTPADQTAFTIITGLNQFYWFLGCTAGGLIGSSLPFDTKGLDFALTALFVV  
LLVEQMKTVKTAAPYLLAIASAILALIFVSGRNFLLVSLALASCLLLLFRKRIHQ\*

>SPSA8\_v1\_360008|ID:41145854|azlD| Branched-chain amino acid transport protein AzlD [Spirochaetes Bin 1 SA-8]  
MIRYYLLVIAVMTIVTVFTRAVPFLFFSGRKPPQWLDY LQKFMPPAVMTLLVFNALKDVS  
FAEAPYGLPALGAALVTAILHLWKRNVLLSIAGGTAVYMLAIRLPL\*

>SPSA8\_v1\_360009|ID:41145855| conserved membrane protein of unknown function [Spirochaetes Bin 1 SA-8]

MKFQIVTKLYKNLISTLSFSSELRKMRELNAKIDMPDTISPGMHAAHALGVNRWFKKRRV  
SIAESYLMVVSNDLSKYAEKRLDALRVLADVAFHKNLDYPLNTARVQMALIKGVVKNRT  
NKRRQLELLHDFTISSRGHQVLARLCDELNIIELPEQGLRLEDFSYGWDSHVHDTATTG  
RKNATQLIIDAFIKGISELTCA YGSADDIATMEEVLEAGSILGIRIHLGIEFSMEVMGKR  
GHFMALLPDSIKTPADVRAFFDTNEQTLKEFFDGLATNQLNRMASVRQLFREFNQTYLVE  
LNEGFPDSPLFRVPELTLESLQEFIPTVSINRLHIAEYLYNIYKPILOQRLLHLKVLKVRAG  
MKQGHGRKKPDSPEFRKIDKLYSALKKELKNLTPDILMERYFSGPRIIDYTSVFKDIEKL  
KSQLTQAGCRLKMLHPLFGLDDAEKILIRYRGIIDEVELFSTQDCIGRKPEEIEALAVM  
INRLNALDGPPLVSVCGSDSTGRNPHVPGMGFIFEDKIIGARKNSYVRRHMALPPIVSAM  
VNAKGRHVSEEDILRAPVIISMKGKISTGKERDQNEFINPWRAFRLNPLVKNILVSI  
FLVADSFVWGYALLWLAITGFRNSIADLISTRGTCLNEWKIKSINFDNVVQSLFWTGFS  
VPILGFVKSSFDTVWQGVHDGLVFNLVKFFFISFANGLYLATHNTLRGFDRKVVRLNFFR  
SVLAWPFATIFAPVGNLIGIPSIVQTKIWSDFIAGFIEGGNKYLKVLRLRRQNLEEIPL  
ISDAEESTRYAAML DLLYLFREEPRTKSSSLRAIFDPAYKPLIVLKG YVKPKPQGYEAFHR  
AIFAPDLAEKLSLFI LSQYEAERAEDLANLAADTL PVLRSWLESKLN AVIAAV\*

>SPSA8\_v1\_360010|ID:41145856|rbsA| fused D-ribose transporter subunits of ABC superfamily: ATP-binding components [Spirochaetes Bin 1 SA-8]

VAEPLISVRNLNKSFPGVHALKDVFHFDLYPGEVHTLVGENGAGKSTLMKVLVAGVYQKDSG  
EILVNGKPV EIPN PRAAQR LGISIIHQELNLMNHLTAAQNIFIGREP KKYLG LFLDEKQL  
NRKTQDLFGLLKMDIDPRVKIGELTIAKQQMTEIVKALSYNKVLIMDEPTAALNEIEIE  
ELFGIIRHLRSQGVGIIYISHRMDELFRISDRITVMRDGQYIDTLKVS DNTLNDNVISLMV  
GRKIYESAPQIDLA VNRPVVLKV SGLNQGKTLKNV SFEAR KGEILGFAGLMGAGRTETAR  
AVFGADPIDSGEILVNGNKVTIRHPSDAVRHGIGYLS EDRKRYGLAVGMDIETNIALASM  
QSFTGFGGFINIKATRKAGSDMIQKLSIRT PSLSQKAKYLSGGNQQKVVVAKWLIRNCDI  
LFFDEPTRGIDVGAKQEIYKLLNELAEAGKTVIMISSELPEILRMSHRIVVMCEGRVTGE  
LLASEATQEKIMKLATQRESMVKTAQ\*

>SPSA8\_v1\_360011|ID:41145857|rbsC| D-ribose transporter subunit ; membrane component of ABC superfamily [Spirochaetes Bin 1 SA-8]

MPEKIIADKAAKDSFSSSSAKQKILAFSSLIILLIVFSFASPNFFQSNNLIAIMLATAVN  
GVLAIGVTFIIITGGIDLSVGTMMTFTAVMAAQFVANWHMPVMVGVLVAIMTGMVCGFLS  
GVMVAKLKIPPIATLGMMMLTKGLSLIIAQSKPIYFTESPTFALIAMGSIFSIFESFKI  
PNAVLIFFALAIVASIILNKTVFGRYTF AIGSNEEA VRLSGVNTDRWKIGVYAFSGAICG  
IAGIIASRLNSAQPALPGYELDAIAAVVIGGTSLSGGEGTILGTVIGAFIMSVL TNGL  
RILSVPQEWQIVVTGVIIIFAVYVDMLRRKRSK\*

>SPSA8\_v1\_360012|ID:41145858| Periplasmic binding protein/LacI transcriptional regulator [Spirochaetes Bin 1 SA-8]

MKNRRIMTVLIVAMMLVA VTTVAVAQTVYIPLISKGFQHQFWQAVKEGAMQAAKDYKVTI  
TFEGPESEAMVDKQIDMLSAALAKKPAALGFAALDSKAAIPYLKQAQAAKIPVIAFDSGV  
DSDIPLTTCATDNIAAAALAADMMAKLIGGEGEVAVIVHDQTSRTGIDRRDGFVNRIKEK  
YPKIKIVSVQYGGGDHLKSTDLAKAIQANPNLKGFFGANEGSAIGVLNAV KEMGKIGKI  
TVIGYDSGAQQIAAIRSGEMAGAITQNPVIGYKTVESAVKALKGEKLPKFTDTGFYFYD  
KSNIDDPKIKAVLYQ\*

>SPSA8\_v1\_360013|ID:41145859| Fructokinase [Spirochaetes Bin 1 SA-8]

MLPCPVWMRQPGAQAPEFRHNKRRICMIACIGENLIDMVPLTAVENAPYGAFKAAPGGCP  
YNSAIAAARLGSTVFYIGKISNDFLGDRLVNRLAGNGVRLDYVARAENPVTLAFVEKSAS  
GEARYAFYASNAADRSL EAGDLPAMLHPDIHFLLLGSISLLEPGAGSILNFTERVQERV  
LVSYPNVVRASMIPDRAKFRSSFEAMCARCAIVKASDADLAWIYDSPFDREIVAHILDCG  
AKLVLVTQGSQGLAATGHAFASAEAVPVRVVD TIGAGDTFHAAVLSFLDSNKWITAKDL  
ENLSAAQLEKILRFASAAAAMDCMREGAEPPTLEALLSRFPDLALQ\*

>SPSA8\_v1\_360014|ID:41145860|fucU| L-fucose mutarotase [Spirochaetes Bin 1 SA-8]

MLIGIKPCISPDL LTVLYKMGHGDELVLADAFFTG DALNARVVRADGLRIPDLLDGILRL  
INLDDFVDNPVIMMQPVPGDTLDYEVERRYREVIDRHWPQTPIVRMERFAFYERSRKAF  
AVVMTGETVKYGNIIKKGVPPVGEFA\*

>SPSA8\_v1\_360015|ID:41145861| Transcriptional regulator, LacI family [Spirochaetes Bin 1 SA-8]

VGKQSITIKEVAEYAKVSTATVSRVINNDSRVIDDTKERVLKAMDELGYKVNIVARSLKT  
NQTKTIGVMAPDLSGDFFMYIAESMDKELAANGYSLVVCASHDSLEEEAKRLRHLAERLV  
DGVVVIPATDRGSHFRFLEEFGIPIVFDRTVTDFAVDAVLTENEEGAYEATKALISDGY  
SRIGFIGGKPEISTSKERFSGYSRALREAGLPVDEFVRFPGPPTLPFGYHAMEEMLKNDR  
SPDAWFLVNAFTHIGATNYIMSDESTRRRNIVIAAFDEMPYAPLLRFCRYAVQQPIAELG  
RTAARLILKKIMEPDPTRTQIVRLKTRLIKHNYREVSYGRI\*

>SPSA8\_v1\_360016|ID:41145862|fucI| L-fucose isomerase [Spirochaetes Bin 1 SA-8]  
MEEFEMQEPQLRLRGGLPKIGIRPTIDGRLGGVRESLEAVTMGMARAAAKLISENLKHPS  
GHAVECVIADTTIGGVAEAVAAQEKFAREGVAVTLTVTPCWYCYGSETMDMDPNTIKAVWG  
FNGTDRPGAVYLAAVLAAHNQKGLPAFSIYGHDVQDLQDQDKIPSDVAEKILKFARAGLA  
VAWMRGKSYLSVGSVSMGIAGSIVDADFFQSYLGMRNEYVDMSEITRRIEEKLYSEAEFE  
RAMRWVRTYCAEGPDNNPPEKQHSRSKKDKTWETSVKMAIIMRDLMVGNPGLRRKGLGEE  
ALGHNALVAGFQGQRHWDHSPNGDFMETVLNSSFDFWNGIRQPYIVATENDSLNGVAMLF  
GHLLTGSAQIFSDVRTYWSPEAVKRVTGWQPEGIAANGFIHLINSGATTMDGTGKQRKDG  
KPVMPKPWWEVTPEDAKACLSATSWRYASLGYFRGGGYSSDFLTEGGMPVTMSRINLIKGL  
GPMLQIAEGYTATLPEHVHDSLDRDPTWPTTWFPRLTGTGPFKDVYSVMAAWGANHG  
ALSYGHIGSDLITLASMLRIPVSMHNVEPSTIFRPSYWSAFGMDPEGADYRACSALGPLY

\*

>SPSA8\_v1\_360017|ID:41145863| protein of unknown function [Spirochaetes Bin 1 SA-8]  
MKSVKNVLIGLLLLTAVATVFGQYAGGTFQTDGKMMMLQQNGSQLSGTYDYAGGRIEGTI  
MGNTATGWYQTNKGRFIFVFNQDFSAFTGKWGYDSSEPSATWNGTRIGAAPMQIPPPA  
SYGTMGQATGVYLSDFGDMTLEQNGSSVTGRYTHADGRIEGLNGNVLTGWYQSNKGR  
FSFVFNSAFTAFAGKWGYDSNEMTGTWNGTRKESKPKSTNQQTVIQVEGTEVFSNWNKAG  
VANLPPSHTYFYIAKSMTITRIVNYHWNDRGQYPGYISLRSSDGKTYGPWQAVGTSGTG  
GAQNVNWIVYPNVLIAMGLYQIVDSDPGSWSHNGMSFGSGFSSVTAK\*

>SPSA8\_v1\_370001|ID:41145864| Radical SAM protein (fragment) [Spirochaetes Bin 1 SA-8]  
VLNLDEQIARAVAFTRYRYKARLFFLYFQAYTNTYLPVQQLRALYDHAIAVMEAIAPGTL  
RGLVISTRPCIDREKVELIASYQRQGLEVWLELGLQSAHDQTLKRINRGHTVSDFVAAS  
KLAHDAGIRRAVHVILGLPGENRLMMELETMRFLQKNGLEGIKFHDLRLAKGSALERSYRA  
GEFAPLHPDRLPPLLADCLELLPASVEVLRLSSDFSRDSVLDLFPHPDKNNLYMAVEAEL  
ARRNSFQGRLE\*

>SPSA8\_v1\_370002|ID:41145865|acyP| Acylphosphatase [Spirochaetes Bin 1 SA-8]  
MKAFAVIRGDVQGVGFRASAAWEARRIGVTGWVRRNTDEGSVEVWAEGNEPELEEFFHWL  
EHGPSTAWVREVQRVWEPTGRYSSFGVFLGD\*

>SPSA8\_v1\_370003|ID:41145866| Short-chain dehydrogenase/reductase SDR [Spirochaetes Bin 1 SA-8]  
MKTGLSGKIVFLSAATDGLGFAIARQALVEGARVFIGSRSEEKVRIALEKLAPLGDASGI  
PLDMASGESIKDWVKAGLALFGGCDALLVNAGGPPPGNFESFGDDSAWQKAFELTLLSAV  
RLIRESLPALKASGHGSILTITSSAVKEPWPELILSGVMRSGVSSLVKSLSRELGHY GIR  
VNNIAPGKIMTSRLEKIIRSEAEARDIPYAAQLENTERDIPLGRIGTPDEFAQVAVFLLS  
DAASYVSGQTVLVDGGITKFLY\*

>SPSA8\_v1\_370004|ID:41145867| conserved protein of unknown function [Spirochaetes Bin 1 SA-8]  
MPFNKISVQQRVPPLELLNPRTMEVVLEALRDLVEYELAVVLRLETQDKLVVRKAV  
GPLYTPRLEGHSISLAKRPDIARLLEHKEARLFGEHEAHIDTYDILDLPDGHSCLVAPL  
YIESTPIGLLTLDHRACNRFTPSIVRFISTISRLISISIVQSDASSLLETTRQLTEERN  
RLDESSDAFRDLVGVSAAWRRVLDAILVAVAEVPVLLTGETGTGKEQVARKIHQLSHR  
ASAPFVAVNCSALVSSLAESLFGHEKGSFSGAVAMRRGRFELADGGTLFLDEIGDLPIE  
LQPKLLRVLQDGKFERVGGERSISVDVKIIAATNADLELAIAAGRFREDLWYRLNVFPIH  
LPSLRERDEDAALLAEYFASQIRRRPGFEALALTPPAIREILNTKWRGNVRELRNAIERA  
AILARGENILAEHLMPAVNAYRGNQAQGPQKRLTPVASSATGVSEPDSYFPNINEALRT  
HIMTALKKSGGKIYGS DGAAALLGMKPTTLQSKMKKLGIDRNNQEL\*

>SPSA8\_v1\_370005|ID:41145868| putative peroxiredoxin [Spirochaetes Bin 1 SA-8]  
MEQQTFFHMPLLGDFFPSLTLQTTQGMNLPDGLKGQWFVLFSPADFTPVCTTEFVGFQR  
LMPEFEKLGVKLIGMSVDQVFSHIKWVEWIKELGIEITFPIAAANDSIANALGMLHPGK  
GTNTVRAVAVVDPQGVRLVIYYPQEIGNMEEVLRVAVKALQVADTNKVAIPANWPNNEL

IKDHVIIPPAKTIAEAAARLKEYDGYDWWFCHKAL\*

>SPSA8\_v1\_370006|ID:41145869|hprA| Glycerate dehydrogenase [Spirochaetes Bin 1 SA-8]  
MFVTWCKTDTMKIVVLDGYTLNPGDLWDNALAALGDVAVYDRTEASSIVERIGDAELILT  
NKTPISAETMQACKNLRYIGVLATGYNIVDTAAARAAGIVVTNIPTYGTDSVAQFTFALL  
LEICHHVGHHAQTVRDGEWTKSPDFCYWHYPLIELAGKTMGIIGFGRIGRRTGEIARAFG  
MNVLAYDEYPNTVSEKEGISCTTLDRLLAESDVISLHCLPLTDRNKGMINTDTIAKMKDGA  
ILINTSRGPLVDEALAAALNSGKLA AAAAVDVVSTEPDPNPLLKARNILITPHIAWAP  
KEARSRLNIAVENIRAFIDGSPINVVVF\*

>SPSA8\_v1\_370007|ID:41145870| putative type I restriction enzyme HindVIIP R protein [Spirochaetes Bin 1 SA-8]  
MPHLTESEIESATLSWLSDLGYQTLFGPDIAPDMPAAEREHYGQAVLEGRLRNALARNLP  
HAPAGAREEAFRTLTRPDSPSLIGNNHAFHKMLIEGIPVEVQRKDGSGYGHQILAIDFAH  
PDNNEFLAVNQFTVVENHIERRPDVVVFINGLPLAVMELKNAADENATIWSAFNQLQTYK  
QQIPALFAYNEALVISDGVEARIGTLTADRERFMPWRTIEGEEELADARLPQLEVVVKGVF  
DQKRFLDMIRHFIVFEDDGGGVLIKKMAGYHQYHAVNVAVKETIRACRCPENTREDSGTY  
FAKGQKDARPGDRRVGVVWHTQSGSKSLTMAFYAGRIILEPAMQNPTIVVITDRNDLDDQ  
LFATFARCHELLRQQPVQAESRSHLRELLKTDSGGVVFTTVHKFFPADDEDHRPLLSDRR  
NIVVIADAEHRSQYDFIDGYARYLREALPNASFIGFTGTPIELSDKNTRAVFGDYIISIYD  
IERAVKDGATVPIIYESRLAMLELNEEERPKLDAEFEEATEGEEIEHKERLKTQWAQLEA  
LVGTEKRLKLI AEDLVKHFEARLAAMDGKAMIVSMSRRICVELYKAIVSIRPDWHHEDDD  
KGMKIVMTGSASDPPEWQSHIRNKL RREELAQRFKDPRDPFKIVIVRDMWLTGFDAPCL  
HTMYVDKPMRGHGLMQAIARVNRVFRDKPGGLIVDYLGLADQLKYALASYTESGGKGETA  
IDQEKAVALMLQKYEICCDLFHGFSWSAWKTGGAQERLSLLPAAQEHVLAQEDGRNRLAK  
AVAELSKAFALAVPHESALEIRDDVAFFQAVKSVLTKSTPDDRRSPDEIEHTIRQIISKA  
VSSHEVIDIFTAAGLKKPDISILSDEFLEEV RGMPHKNLAVDMLRRLLEGEIKARGRKN  
VQARSFAELLENAIRKYQNRAIETAQVIEELIALAKDLREADKRGEKLGTEDEIAFYDA  
LEVNDSAVAILGDATLRLIAQELVKAMRSSITIDWTVRENVRAQMRVVIKRILRKYNYP  
DKQAHATELVLEQA EVLCRDWAE\*

>SPSA8\_v1\_370008|ID:41145871| Peptide-methionine (S)-S-oxide reductase [Spirochaetes Bin 1 SA-8]  
MSNQMGFSVRIFIPSGNPDGLRIIEKSNWTGQGLVFPRALYAEIRQRNEISRTGVYILWG  
PQKSGNLLMIYIGEGDSVLSRLDQHAKQKDFWTHAVIFTSKDQNLNKAHVQYIEARLVQL  
AAEAKRAELDNGNVPQPPNLSEADKADAETFLDNILLCLPIIGLNVFEKAKVLGEKSHDL  
ILKSKGIEARGQDTAEGFVVRTGSLAIKDEAPSIHGFLSGLRRTLLDQGFANEGTHFRL  
TQDYTFNSPSTAAGVLLGRSANGRTEWKDEQGRTLKKIQEDESSGP\*

>SPSA8\_v1\_370009|ID:41145872| Reverse transcriptase [Spirochaetes Bin 1 SA-8]  
MGTQAKGQSKSQT LKNKDFDVLAMSCKKARAFFLKPESYCNIDLPSYFNFKILSSVAKI  
LDKRELSSMSRKPYEHEGVNYSLLSNKDGRYAWRPFQLIHPALYVSLVNYITEQKNWEFI  
RARFKKFHVKNCRCLSIPIKSKSKRKDKAAQILRWWQEIEQKSIELSIEYEIFHADITD  
CYGSIYTHSIAWALHNKEIAKINRGNQIIGNIIDRHIQNM RHGQTNGIPQGSVLMDFIAE  
MVLGYADLQ LNNKLDQAGIGEYQILRYRDDYSVFNPNPQTGEAVLKALTEVLIGLGLKLN  
TSKTTGAQSVISNSLKADKLAWLRARQEDENLEKHLIIHAHGLDYPNAGSLLQPLQDYM  
KRLSHVEHIQNPLALISIAVDIAFNSPRTFPVVT AIVSRLLLFLKSDEECAEVIKKVHAK  
LSRFPSTGLMEVWLQRIGHFYGIGNYEEKLCHIVTGKEHVLWNNDWITLKEMKEAINPAD  
IFDKVKFKAMKPIVQPFEIDLFNEY Y\*

>SPSA8\_v1\_370010|ID:41145873| Restriction modification system DNA specificity domain containing protein  
[Spirochaetes Bin 1 SA-8]  
MGGEWRKVRVEDIAEKIASGPFGSNLREKEYTDGGVPVIRGNNLTGPRFNRRDYVYVSEQ  
KADQLRASLAYPFDIVFAARGTVGAVGIVTKCRFSRLLSSNLVKVTVDQAKADPHFVY  
YFRSADGQNEILAHVNTTGVPKIERALESRRFRINLPLPEQRAIAHILGTLDDKIELN  
RRMSQTLEEMARAIFKSWFVDFDPVRAKAAVRREHPDWTNAQVSRAACP NLKPEIAELFP  
DRLVDSELGEIPEGWKIGCIGNEFNITMGQSPPGNTYNEVGEGLPFYQGR TDFGFRFPMR  
RVYCTAPTRLAKKGD TLISVRAPVGDINIAAEDCAIGRGVAAARHKTGSR SYTYQFMHAK  
ADV FACFEAEGTVFGSIGKKDFNMIRCLVPPKIVVTA FDRLIVQLDDRISINEHQSYNLA  
ALRDELLPKLISGEIRVKDVERLLERT\*

>SPSA8\_v1\_370011|ID:41145874| conserved protein of unknown function [Spirochaetes Bin 1 SA-8]

MGNEPAPVPEGLQLLIYHDGALRVQVRIDGKTVWLTQRLMAELYQVTTANINQHLKAIYK  
EGELSPEATIKQFLIVQTEGSRQVSRMVDHYNLDAILAVGYRVRSARGTAFRQWATARLS  
ELLVKGFTIDDERLKQGRITLGDYFEELLERIRDIRASERMFYQKITDIYATSIDYDPNA  
EITKTFFATVQNKLHWAHGHATAAEIIFQRADASQPNMGLTTWKNAPYGPIRKADVIVAK  
NYLSEEEIRELNRIVSMYLDYAEDQARRRKP MYMADWVKKLD AFLAFNERDILMHAGKVS  
QALAEHHAHVFEK YEAERRRVEASTPSSDFDRFVEQTKQMIENEESLPKIEELAQRNRE  
SKR\*

>SPSA8\_v1\_370012|ID:41145875| putative type I restriction enzyme HindVIII M protein [Spirochaetes Bin 1 SA-8]  
MAKSSNNGANLGFESLWRAADALRSNMDAAEYKHVVLGLIFLKYISDAFEEQHAKLEAE  
RAQGADPEDPDEYRAVNIFWVPREARWSRLKAEAKOPTIGKTIDDAMLAIERDNPSLKGV  
LPKDYAHPRLDKQRLGQLIDLIGNIGLDRENRSKDILGRVY EYFLSQFASAEGKKGQF  
YTPRCVVRVLVEMLAPYKGRVYDPCCGSGGMFVQSEKFIEEHGGKIGDISIYGQESNHTT  
WRLAKMNLAIRGIEGNLKEHADTFHRDLHPDLKADYVLANPPFNDS DWGGERLKEDKRW  
KYGIPPAGNANFAWVQHFIHLAPTGYAGFVLANGSMSSNQS GEGEIRKNIIEADLVDCM  
VALPGQLFYSTQIPVCLWFIARDKKNGSFRDRRGETL FIDARKLGT MIDRVHRELTNEDI  
KKIADTYHAWRGDKDCKASYQDIPGFCKSATLDDIRSN NYILTPGRYVGSAPQEEDEP  
EEKMQRLLVAQLREQQAEAAKLDAAIAKNLEELGYGK\*

>SPSA8\_v1\_370013|ID:41145876| Dual specificity protein phosphatase [Spirochaetes Bin 1 SA-8]  
MTFTSLNDPIHIDSVKISGRNGEIGMTFCPGRRGAGSLGY YERDLVADLRAVREWGAEVL  
VSLIEEHEYRMAGIEDFDMKLPEGLKHLRMPIDGGTPDETWERQWKADGCVVREVLERG  
GKVCLHCMGGLGRTGMIAARLLVEFGLAPDEAIAQVRAARPGTIETAGQAEYIRQCARN  
TVA\*

>SPSA8\_v1\_370014|ID:41145877| DNA polymerase III/DNA elongation factor III, tau and gamma subunits (fragment) [Spirochaetes Bin 1 SA-8]  
MPYEVTASRKRPQIFEQLAGQEFVAATLEKSIETGRIAHAYLFSGPRGCGKTSTARILAK  
ALNCESGTPHPCGTCDCRSITAGSSLDVIEIDGASNTSVDNIRQIKDEVLFPPNSSRY  
KIYIIDEVHMLSTSFAFNALLKTIEPPPYVVFMFATTEPQKVPATIKSRCQQFTFRLVSP  
ETVKNLLAAAAGDLGVTAEEEEAXX

>SPSA8\_v1\_380001|ID:41145878| protein of unknown function [Spirochaetes Bin 1 SA-8]  
MAEPGKIIHVPIEDEVKTDYLTYSMSVIVARALPDVRDGLKPVHRLLFAMEELGLRNNA  
STKKSARITGDAMGKYHPHGDLSLYDALVRMAQDFSLRYPLVYGQGNFGSIDGDPPAASR  
YTEAKLSRFGEEMLADLXX

>SPSA8\_v1\_380002|ID:41145879|gyrB| DNA gyrase subunit B [Spirochaetes Bin 1 SA-8]  
MDSNYSANTIQVLKGLEAVRKRPGMYIGSTGIDGLHHLVYEVVDNSIDEALAGYCTDVLV  
VLERNDIVRVEDNGRGIPVDVHPTEGISALELVMTRLHAGGKFDKKNYKVSGLLHGVGVS  
VVNALSSWMEVQVHLDGKLYFQKYQEGIPVDPVAEIGITDRRGTVVRFKADPTIFEETVY  
SYDVLSNRLRELAFLNKGVKIILVDERLSTPKSIEFKFEGGLRQFIEHLNKNKNVLHKDV  
VYFHGTRDDVEIEVGLQYND SFNEIVFSYVNGINTREGGTHLTGFRAALSRTVNEFFKKS  
KYVKKLDETL SIDDVSEGLTAVLSVKVM EPQFEGQTKGKLGNSEVKGIVDGFCSDQLDL Y  
FQKYPEIVNAILEKCVLAAKARIAARQARELTRRKNLLDSASLPGKLADCQEKDPTKCEI  
FIVEGDSAGGSAKMGRNRVYQAILPLWGKMLNVEKTRIDK VIGNDKLQPIIASLGAGIGN  
EFDVSKLRYHKVIIMADADVDGSHIRTLTLLTFFFRYMTPLIEKGHVYLAMPPLYKISWDK  
EIRYAYDDEEKDRILSGVEKDPSKIAVQRYKGLGEMNPEQLWETTMDPERRNIIQISMDD  
AVLADQMFTTLMGEQVEPRRQFIEENALAVSNLDI\*

>SPSA8\_v1\_380003|ID:41145880|dnaA| Chromosomal replication initiator protein DnaA [Spirochaetes Bin 1 SA-8]  
MDTFDGS AIWEEALNQA KKDISEQEFLMWFRLSYEKLENGEMTVRAPNTFLRDQFSRKYI  
PYMLNVLKSLTEL DLKLVVRAFKPDIAGGQDTAERDPAPSSGTDVAEKNGQLNKSDPAPS  
KAIFFDSPSHSREKSSTPASIASTEPRKHTSLRPNYRFENFIVGENNRFTYNASEAVAKN  
PARTYNPLLIYGGVGLGKTHLMHAIGNSIYENFPEKKIICITAEFTNEFIQMIHDRSSQ  
EFKNKYRSADVLLIDDIHFFQNKPGVQEELFYTFNALYDSERQMVFTLDRHV KELKDFSD  
RLKSRFDKGLVVDVQPPMYETRVAILKQKMLQGNRTVAVAEDVIDLIASNVSSNVRDLEG  
SLTKLIAAY AELVHKDLTVDIARNLLKELFNTKKHSAITVDSIIRMVADFYKLSLSDLKGG  
KRSKNIALARQVAMYVIREVTEYSTTEIGVEFGGRDHTTVMHSCQKIEQMAKFDPSFDAS  
LQRLLRDAREHESS\*

>SPSA8\_v1\_380004|ID:41145881|dnaN| DNA polymerase III subunit beta [Spirochaetes Bin 1 SA-8]  
MKFTCDKTSLLREISFAQEVIASKNALSIMSNVYLEAVESRLYIKATDVKVSFQTSIPVV  
DVVPGSLTVFCDKLAGILASLPDGDIVVEQDENRVTLKPTSKKIRFQLRTLSGEKFPEIP  
RAEDERFFEIQAREFRKMIGQTLFSVSTDETRYFMNGVFMEKSAEGDLIMVATDGRRLAF  
IKNSIADEVPDFKPVIIPTKALSLINKRMSDEGLISIAITEKSIFFRFNAYEVSSVLI  
QFPNYQKVIPQNQKLVFKVAKSDLLEALKRVSIFVEQKSNRTFFTLNGLSLVLSSEETDI  
GAAREEACDYDGDVVIALNYKYEELRVLDEGNLAVFNDPSRAITLRPEPAGDYFH  
IVMPMQID\*

>SPSA8\_v1\_380005|ID:41145882|recF| DNA replication and repair protein RecF [Spirochaetes Bin 1 SA-8]  
MSFSRIRLVSYRNLEDAEINTAADRVFLIGENGQGKTNLLEALYLSFGGSFRGQVDSQI  
PANGAKGFGLKGYWNNNSILEDEIEVSVQNSVKDIHLNGKPVDRKELVGHNPSSVFCHE  
DFSFAAGEPELRRFFFDQCAGMISLDYIDILRAYRRVLKQRNAALKESAYDLLEVLDPQF  
VRYGRELMAIREIIFSRFQQQFPQLYEHVSQLGKPVLELYKPNWSQGAGFEEILQFVESK  
RDIEIIQGTTRSOPHRDRWNFVCGGESFTDTASTGQLRLVSLVLRVVEAIVYAETAAAQT  
GKRQWPVLLLDVLELDVVGKRRRLELLPGEHEGAQAFFTFPLPGEPWTEYASGDTLVYR  
VNHGRFEG\*

>SPSA8\_v1\_380006|ID:41145883| conserved protein of unknown function [Spirochaetes Bin 1 SA-8]  
MDDSRAXSVSLLSAFFDEKTLQRGEQYAQFSRSWRSIVGDRLADHSRPSDIRHGVLIE  
TDHSGWIQLQLKQERILGEIMKRYPELDIHGLAFRIGYGEGDKRTAVVDAPKAGHSPNL  
PASSGNSEQAEPESQAAQMHEAEPLHETAQPERSEGESAGKSEEKSKLPGFLLKKFDHI  
RKNIEKR\*

>SPSA8\_v1\_380007|ID:41145884|rpmH| 50S ribosomal protein L34 [Spirochaetes Bin 1 SA-8]  
MKRTYQPSKTKRNRKFGFRARMSTKGGRLVLKRRRAKGRLLKLSVADENKKY\*

>SPSA8\_v1\_380008|ID:41145885|yidC| Membrane protein insertase YidC [Spirochaetes Bin 1 SA-8]  
MSIFTPGTESKEESRRTHIAVVLSTLIVGVGFMVQNALFPPVQQTQPVQTTQTTESQPVA  
APQSSVQPAAVPAISAQTAEPAPVAQATYKIETNLLKVELTNAGGDIVSLKLLKHKDKNDK  
FVDLIVPGASGAKGLSLSFGGADAPVISDFMKAEWLDAERRTIAFTRTFMAKSADSDELV  
PFTYKKVYSFRDDEYMFGLAVTLENSTNKAVPLNANGVAYTLQMGPQIGPRFDQLPKNAD  
YRKYIMEVNGKKKIEMPKPNTMQVIKEQPSWAAMAGKYFAFIGIPQAPFATFSFYQGQDP  
DINQNTMFI SRPAITASVQTDTYFYFGPKTSTELAKYEYSDKNSFGLASMKLEDATER  
SNILGWLEAILKFMLNIFYKIIPNYGIAIILVTIVIKIIFPLTKKGSISTAKMQELQPK  
VAELQAKYKSNPQKLNQEMAEFYKREYNPNMSGCLPMLIQFPLFIAMYSLFNNHFDLGA  
SFIPGWISDLSLPESILNFGSFRLLPLLGWSDLRALPIIYLAQLLYGKFTQTPQSGQNAS  
QMKLMMYGMPIFFILYDVPSGLLIYWIVSNVLTIVQQVVINDMLKHKHLALAEAGNGS  
TGTAAGNAKSGNGQSMKNAGKTTVRNGPQEGFSQKVTKWLEDKAKEAGADTSKPGKPGD  
KPKSGKKQ\*

>SPSA8\_v1\_380009|ID:41145886| Spoiiij-associated protein [Spirochaetes Bin 1 SA-8]  
MIYEFEGKTEREAIEMAAAELGLETDFDVEIVESQAGGLFKKGKVKIRVHVRDSAGSPG  
TMAGEPDSAAGLDGEAESEVPDQPARREKAVSDKPLLPNDEFERKMIEWTSEVVTRMGYP  
AKVTVLFREEKKLGLKIETENTAMVIGKKGKNIDALQLLANVYAGNLGRDDLKIILSEN  
YRVRREESLVRIAYESAQVRRRTGRSILLEPMNPFERRIIHTTLNDIVDIETKSEGEGLY  
KQVRVTFRGRK\*

>SPSA8\_v1\_380010|ID:41145887|rnfC| Electron transport complex protein RnfC [Spirochaetes Bin 1 SA-8]  
MTAKTFRGGAHPPEKKDRSSGLAVERLRDVKQVVIPVNQHFQAPLQPLVKVGDYVVKRGQK  
IADADGRMTVPVHASLAGVVKKIEPRTQSNLDGPCIIIIEAKQPEPVDGVVSSDDFMP  
LDPFTCSKEEALARIRAAGIVGMGGAGFPTHVKLAPSKPISYVIANGAECEPYLTIDERT  
MIERPEDVVEGVVAITMKIVNAPEGIIVVEENKMHAIPLLEKAIASSPRTRAGMKIRVQLL  
KTKYPQGGEKMLITALTGKEVPSGGLPMDVGCVVQNIQTLTLCAMVEAFRDGKPLIERGLTI  
TGGACTKPANVIAPIGTPVADIIAAGLTAVDDEALRRIIYGGPMMGVAVPNYSIPVQKNT  
SGVLFMNAEEAVHYEETCIRCGRCMRACPIRISPALLAVSVETGDYKEAEKIGLLDCIE  
CGSCSFVCPAHRHLVQKFRVGKQILRTIKQKEAQNAR\*

>SPSA8\_v1\_380011|ID:41145888| Electron transport complex, RnfABCDGE type, D subunit [Spirochaetes Bin 1 SA-8]  
MPAKGMLLSSSPHSFTPINTPRMMLSVIIALIPASVYGVYLYGFQALALILVTVLSAVAS

EYLFRKLIKAKTTIGDFSAIVTGLLLALILPPKTPLWMGAMGAFFAIVVAKEFFGGGLGAN  
PFNPALTGRAFLMSFPAAITTWMPHGLGLADATSTATPLALVRQGAALTDVATYFGAS  
DIGSLYRQLFMGYRSGSLGESSILLVLIGGLFLLALGVIQWIVPVSVIGSAFLFSWLLGM  
DPIFNILTTGGVVFGAFFMATDYATRPLTPAGQAVFGVIGILLTVIIRKFGGFPEGVTYAI  
LIMNLATPFLNKMVRVKKYGFVPPVKPAKPTKEAVK\*

>SPSA8\_v1\_380012|ID:41145889| FMN-binding domain protein [Spirochaetes Bin 1 SA-8]  
MKGIACLGLVLAIFAAAACASLAVVYAITKPQIEAQDQIALTASLKEIFPEAVNFEDVTD  
KLVSKDANIKFLNAVLVKGENAPIGVAVKAAGPSYGGQATLLVGITLQRSIAGVRVLELK  
DTPGLGANANNPGYFVKKAEKVTFPGQFTGKYLTDFAVVKEDVIAITASTITSKSLTKII  
KTAGDSAAEWLETVTADTSAETTGGK\*

>SPSA8\_v1\_380013|ID:41145890| Electron transport complex subunit E [Spirochaetes Bin 1 SA-8]  
MKSLWKTfKQGIYENPLMLMIGLCSALAVTSSVSNIGMGLAMTFVLLFSEIVISLFR  
KVIPNSARIPIFIHIAAFTTMVDLVMKAYFPELSKSMGVFIPLIVVNCIIMGRVEAFAS  
KQSFLPVVFDLGMGIGYTWWLVAIAAFREILNGTFFAGIQVMPGNFQPILFFILPPGGF  
LVFGLLTSFNIWLKNRMAKSEKAKERA\*

>SPSA8\_v1\_380014|ID:41145891|rsxA| putative inner membrane subunit of an electron transport system [Spirochaetes Bin 1 SA-8]

MDLIKIFLVAVLVNNVLMRFLALCSYIGMTSDVGGQSVGMGFAVTFVTVLATAATWPIYH  
FILVPLGLTFLQILIFILVIASLVQLVEFYLLKKNIPGLYAAMGIYLPITTNCAILAVTF  
ENISFKYSFIESIVYAVGVSIGYLLAMVLLAGLRDRMKSSPVPKFLQGTPIFIATALIG  
VAFMGFSGLIK\*

>SPSA8\_v1\_380015|ID:41145892| Electron transport complex, RnfABCDGE type, B subunit [Spirochaetes Bin 1 SA-8]

MVTIVLITIAFSAILAFVLGTALGFFREKFKVERDPKIDEVREALPGANCGGCGYPGCDG  
YAEAVATGRAPTTKCTAGGSATAEAVSKIMGVDAAREDVSVLLCQGTKDVAVSKGEYVG  
VQTCRAAKLSTGSVKACSWGCQGFDCVNVCKFDALVMGEDGLPHVNYDNCTGCGMCAEE  
CPQKLFVMVPREKKGSIVLCSNRNVIKANVLKTCKTGCIKCEICVKSCPEKCITMVNGIP  
VTDYSKCTSCGVCVQKCPHAYKLEVDVMGEKVVVLEA\*

>SPSA8\_v1\_380016|ID:41145893| protein of unknown function [Spirochaetes Bin 1 SA-8]

MEANRLLLAVMLAVSPAFLFAYSEFPPLSAANASRAREMVVAAAYGYIGVPPYLYGGESA  
KGMDCSGLVYAVFSRALNSGVITAEATAAGSASSQIPRTVSQQSQWALKIPRSQKPGDL  
LFFVLEPAAALTSKPDHVAIYIGESRFIHAASIGTSRGTINSLNEPRWSARFLFAGRV  
IPASAALSVAIEWGAEAVFDALPEPFEGVRGAGLWSGIELPLGNNFSAGLRAHASYSRSL  
AMLRVPMEATIGQTSGFSLFAGAAFTWDLNSGELFMPAGLISTIGIRWSPLIFSSSGSRL  
GTSFELRYNHLLAEKNQPWNSRADQYASFTLSAGFRVRTLY\*

>SPSA8\_v1\_390001|ID:41145894| putative capsule biosynthesis protein [Spirochaetes Bin 1 SA-8]

MIKISFVGDIMCQKWLLKAAKKKDGSDFTS VFQNMKEIFAASDYVVGNETVCAGKKNR  
YTNDMYSYNSPDSLLEAIAASGIDMVTCANNHSLGRGSEGLYRTLSLLDAAGMQRTGAYL  
PTEDWNEPFTIELHEKKITFIAATSSSTNKSTLECGLAPDGHKLLQYQHATRSKKSIT  
RKCYDWAKVMVPLELRLFINRMLGRGTRRAAADNGGMDNFSGKLRVDLERVIMRARETAD  
YVIACPHMGGQFNLEPGTFSKYMMDFRTQKVDCCVANHAHVQRCEWKEDMLACYCLGN  
FCVFPLNSDMIRGSLTEYSIMLHLYLDDSGPGLTTSVGVFTVLKNVKNNEGLLTVYPVKN  
LYDSL DGENERKCLRQENSTIIKRFCPTMDKMDVRLEYAMERRTMV\*

>SPSA8\_v1\_390002|ID:41145895| protein of unknown function [Spirochaetes Bin 1 SA-8]

MVNLLSLFQKTPRVQKFALKLAMKMIQVRLALLGVPIIAITGTNGKSTITRLLTRIYRN  
AGYNVACSTYGVTYNEKLVSRDDASGLGAWRAARCSNVDLLVLEVARGLARWGLGFR  
KCTVGIVTNVYEDHLGFEGIHTEQMAELKSAVPRATEKNGTIVLNADDPLVKGMAQKSK  
AKSIYFTLAKDCKEFDNIFYVNGSHIWKKNREIEERIIDVREIPITLNGERTFNVVNVMA  
VLAAVEGMKKYIRVDSASVTKTLGFEFGTDPNDLGTFRISIQGEHVILCNAKNPASFLF  
ETEIVKTIKQKEGFDYIAGTLSSPGNRSIRYYNEMSEIAASTCDLVLMTPPKDHYLRGRE  
PKEIVALLSSKIPQDKILDDNNFTLSQWISFSKSKLNGRILFVIFGSITSPKINIFDESA  
GIHYLAMGS\*

>SPSA8\_v1\_390003|ID:41145896| Pseudouridine synthase [Spirochaetes Bin 1 SA-8]

MRQKTLFPNHPLPTVNGIGIPSLRIPAGPWKNILEYLQERFRTIKPETWISRMEKGAVVD



EYGAPLVPDSPCRKGALVFYYRELEHEIHIPFEESILYQDDHILVADKPHFLPVIPSGRF  
LRETLVRLKRKLKRDVPLHRIDRETAGVVMFSLNPETRSAYASLFTGHQVRKVYEAI  
AQTLPGCHFPVTRRSRLVKGVPFFRMKETDGIPNSETVIEMMENKGTISLYRLTPVTGRQ  
HQLRVHCAALGIPMNSDFYPEVRRREADDFSSPLQLLARSIAFRDPLTGHERCFESTAK  
LETLMAEQY\*

>SPSA8\_v1\_390004|ID:41145897|rrn| Ribonuclease R [Spirochaetes Bin 1 SA-8]  
MWYDSDRMTMRKKKQRQELTKDAVLRIFKQEKKPVAQSELVAILSLNKKQGKTLKQIREL  
VRDGSILQLKNKRYGLPQEMNLVAGTLWCTRSNGFVVPDNLEGKDIFIPARFIKNAFHG  
DKVIVRVEHTFRGRKEGTVVKITQRKMKNIVGFVRRDRNATYIIPEDERIPHHFV VASSA  
KSLRLNDNDLVAARITRFPEGGVDPICTVLKVFQGLTDSRSIIQFVQYKNALPFRFKKRT  
QHEAQLSGTSMIDTDRDLRETIHVTIDGEFAKDFDDAVCIEKTDRGYVLLVSIADVSHY  
VLPETGLDREAYERGTSVYFPGA VIPMLPEILSNGICSLNPDEDRLAMTVKLTFTNTGDL  
TDSSFHKSIIRSVLRITYTEVEDALIRKDRTVRKEVQRILPALEWMGELAALLSEKRARR  
GSLDFDLPEPDVILDIEGGIQNILRAERLFSHRIIEEFMIAANEA VANFLTENKVNTMYR  
VHEPPDTEKLKDLERLLQALSIGYKRDARNIRSLQSVLRNVEGTHYEFVLRVLLRSMKQ  
ARYSSQNKGHFGFLASHCYLHFTSPIRRYPDLICHRVLKNLISDEGKRYGEKELETMANYL  
SERERLAMETEREIEDRIRVLFMRDRIGKEYDGIISHITSFGLFVELINVFVEGLVLVNT  
LCDDYYHFEEGKFRIGRTRKIYRLGDVRIKVLADVEKNLLHFSLVNNHSKF\*

>SPSA8\_v1\_390005|ID:41145898| protein of unknown function [Spirochaetes Bin 1 SA-8]  
MTREEKNLVTAHMDQVFHGGQTVRQNLVCECGKYDEKDLTEAPAVFFREINVFVKTFTL  
IEPLCPVCKQRIHASFNILN\*

>SPSA8\_v1\_390006|ID:41145899| Nitroreductase [Spirochaetes Bin 1 SA-8]  
MELFDAIKNRRSCRNYLPEAIDDTVIESILEAGTWAPSPLNTQPWEFIVITSGDVKEKLF  
SEADRCRWALEKSSWKWLD SYQVDFLKQAPVIAVVGDPKKTGVDMFMDEGMVGYQAAC  
AAAIQNIHLAAHSFGFGLWFTLFDKKA VRGILGMGDDKTPVALILLGKPGASPTVPRK  
NVKDKTRYIR\*

>SPSA8\_v1\_390007|ID:41145900| Uncharacterized membrane protein HP\_1331 [Spirochaetes Bin 1 SA-8]  
MFGYIPLGIVFGFLLTQAGYLWYYAVLMSVAIYSGATQFLAINFFVNHAALIEVAVTLL  
LNLRHSSFFGLSLIRKFSGTSPVKPYLIFALTDETYALLTSMDEPEQKSKTRYFFIALLN  
HLYWITGTLMGALLGQAFTTNLKGMEFALTALFVVLAIEQYKKIRSLKPFMIGAFVGITC  
LVFVAPQYMLLASILSGTTMLLLLRKKE\*

>SPSA8\_v1\_390008|ID:41145901|azlD| Branched-chain amino acid transport protein [Spirochaetes Bin 1 SA-8]  
MSYPHTIVSIFLMAFIILVTRIVPFLFFRKKELPEMVNYLEHTIPPLMMLLLVLYCLKDV  
RWASAPFGFTEFGAISVVVIVHLWKSNAALLSIVSGTAVYMFMLNAFLST\*

>SPSA8\_v1\_390009|ID:41145902| Phosphoenolpyruvate carboxykinase (ATP) [Spirochaetes Bin 1 SA-8]  
MASIQGIPKSPWRAIIESAFFASSVRKTSMAELYDLAKKQPEVLITSEPMYRPEQFGLPQ  
DAKILVSNDDGGIFGRTARARLVRNFTKPEKDKFQSM LAEATYQLNKR PGLWLEGMIGLH  
PDFMIKAHLLSPETDAKNMLDWGFNFIPFMPWSDLYTESRALGEPDILVLADPDWSNPE  
FKDGLVIIDEDQNCIAILGLRYFGERKKGTLTIAWTVGVRHNMVACHGGIKKIGDKPPVA  
VFGLSGSGKSSITNSGDHEGTLTEEEKVTVIHDDAFLIDLHNL SIVLEPSLFDKTDAMQ  
FGDPIVKYFYSAQNMAVTRMADGSQRLVGMDIRNDNGRCLKSRDMFNHAHFCEKPSTVIW  
LQKDTSLPPICKITHSAMAVAMGASLSTMRAKGVENVDPKELERLVIEPFANPFRVHPLV  
EDCRQFLKLFKSGCDCYIMNTHAVGMPGHLTDIPKSSISLIVTALVRGKIEWKEWKAFSG  
LQIPKNGNELFSPDYDKKYSPPKRHPGYLRFLRDRMQDRITFLSNKRDLENDMESIFIDP  
LVASRTVLDRIEPL\*

>SPSA8\_v1\_390010|ID:41145903|rlpA| RlpA [Spirochaetes Bin 1 SA-8]  
VKSLFSFAPFQAFLFVLGACWVITTPYKIVKGTVKGTYYGVKGAYEITAGTTKV VYHIG  
KFSYKIVKAPLEWAFVNEDIEAIDGLSPKEAIRQGRVKNAPYVVKGKTYYPMSIEKARTY  
EETGIASWYGYETLRTKGGRTANGEAFDPRQLTAAHKYLPLPTHVKVTNLENNQWVIVR  
VNDRGPFPSDSNPSSGERIIDVSEGAACKLGFHTKGLARVKVEAIELKKEG\*

>SPSA8\_v1\_390011|ID:41145904| Chaperone protein dnaJ [Spirochaetes Bin 1 SA-8]  
VKQTDYYKILGIEKDATHQKIKETYRRLAFEFHPDRNKGDVSAVEKMKELNEAYAVLSDP  
EKRKRYDSMNQQYGYEAYDHFRRQGYSDQDIFRGS DINQIFEEMTRQFGFRNFNDFREFY  
GPGYQTFEFRRPGVFGRGFIFTGFPFGHQ RNTQGVFSSVKTGLVTGLLGRLAGYLAKKAF

KGWDEGRQATSDRYDVITLNPKDATHGGKVSIDPTTSRQLIVTVPAGVQEGQTIRLKGA  
AGLSGDRSQTGDLYLKVQFRKGVLMKELYNKILSK\*

>SPSA8\_v1\_390012|ID:41145905|trkH| fragment of potassium transporter (part 2) [Spirochaetes Bin 1 SA-8]  
MRYFKNPELRLFISIIIGATIFITAIRMLSGTKLSEETVRDSLFTVSIITTTGTFITKDY  
ELWPAATQIMLFLMFVGGCASSTGGAIKNVRILVLFKYIGAEVKKLFYPRGVFPVKLEG  
KSPENLVSNIMAFVILYVLFIFGTVAVSLGMDMISAAGAVAATLGNVGPGLGTVGPI  
DNFADVPAVAKWILSFLMLAGRLEIFTVVVLTGRFWK\*

>SPSA8\_v1\_390013|ID:41145906|trkH| fragment of potassium transporter (part 1) [Spirochaetes Bin 1 SA-8]  
LNTTNILYVLSRLWMIVSTFFILPLCFSFYTDGIHYHFIFTIGGILLSSCLLWPFSGSKP  
KELTTKEGFLLVNLCWISLTFFGCLPFLTGTGYVKSFTDAFFESMSGFTTTGATILSDIEM  
LPKSVLLWRNMTQWLGGMGVIALAVAIFPFTGMGGAHLFKAIEVPGPSKDKISSRFSDTAK  
LLWGVYLIFTILETVMLMLGGVNFDSLCTIFGTMATGGFAPPQCEHCSFFFSLCSLHHH  
FFYDIGRH\*

>SPSA8\_v1\_390014|ID:41145907|TrkA-N domain protein [Spirochaetes Bin 1 SA-8]  
MRIVIIGAGDVGFNLAKRLGHEGHNLTLIEEDPEKCERAGEILDVSVIQSGTDQEV LKA  
ASLSSADMLIAASGVDEVNLAACLFASKLGVKKKIARVRTSAYYKPD SILKAHDLGIDLF  
IHPEEEVSEEIIRLLMRSTASEIIEFEGGKILMLGMKVAPGFPYLNKQLKDMGTAEQRRH  
FRIIAVLKGDKTIPTGDDYINKNDQVFVVTREYLPPELLKLAGMADEKLEKIMILGGGK  
IGRKYAQSLEKRHIDVIVVESNKA KSVKLAGELEKSMVMHADGTEIDSLVREGILGMDAL  
VAVTSDDENMIACLLAKHLGVRKTIALVNKNYLPLMPVIGIDSTVNTRISTVNAILRL  
IRRGIVSVATFRGIDAEAEVEIKANDRMTGKPLKNLKLPPDALVAIVRGSEVFVYPYG  
DTVINPGDKIVVFALPHAIIKAIIESRLS\*

>SPSA8\_v1\_390015|ID:41145908|fabH| 3-oxoacyl-[acyl-carrier-protein] synthase 3 [Spirochaetes Bin 1 SA-8]  
MKRVAIVGTGSYLPETIMTNFDIQKFLDTSDEWIYTRTGIKTRRIA EKDAAVSDLSKIAC  
ERAMNMAGLKSDIDLILATITPDTHCPAGSNWLEAKLGCTNAV SFDITAACSGFIFAL  
HVADKMIKSGANKTALVIGAEIMTRVVNWQERESCILWGDGAGAAVVTASDSGAHVLSTH  
IHTDGKNGDTLLMPGGGSKTTPISHESVDKGLHFLKMIEANKSFKVAVNRFAEAVEEAVE  
VNGKKVDDVDVIIPHQANLRIIQGMAKRLKVDISKVYMTIEKYGNISSATVPIALDEAVR  
DGTIKKDSLICTAFGGGLTWGSSLIKW\*

>SPSA8\_v1\_390016|ID:41145909|putative membrane protein [Spirochaetes Bin 1 SA-8]  
MTKDRIDLQGFHILFMTMLWGLNYPVAVKVS NAGLSPVFTTFLRSVIATCCGVIIYCLVVR  
QPLFHRGILLFHGAMTGILFGVEFVFLYYGLLYTNASRAAILLYLSPFVAVGAHFFLKE  
RLTVLKGIGLILAF LGIFLVFKGKPTAYNRLMLIGDLCEIMAAIFWGATTIYIKKYLAQK  
VHPINTFLYQLAFSIPIMLIGTFLEEDTWVKGVTTPVLSLFYQSVIVAFASYLTWFKLI  
HIYPVAQLSVFTFLTPIFGVFXX

>SPSA8\_v1\_400001|ID:41145910|rplE| 50S ribosomal subunit protein L5 [Spirochaetes Bin 1 SA-8]  
MQVPRLVKVVVSMGVGEAKENKLLDAAVTDLGIITGQHAVKTKARKSIATFKIRQGQEI  
GARVTLRGDYMWEFLDRLMNVALPRVKDFRGVNPNAFDGHGNFSLGLNEQIIFPEIDFDK  
IEKVMGLNIAIVTTAKTDKEAKSLLGMLGMPFRK\*

>SPSA8\_v1\_400002|ID:41145911|rpsH| 30S ribosomal subunit protein S8 [Spirochaetes Bin 1 SA-8]  
MSVTDPVADMLTKIRNANAARHEKVDIMASKLLEIVKILKTEGYIKNFKKIQAEGVNII  
RVFLKYDEANNPVLHGLNKVSKPGKRVYSGYKEIPRVFNNGYGTLIISTSDGVITGKKAVE  
KQVGELICTVW\*

>SPSA8\_v1\_400003|ID:41145912|rplF| 50S ribosomal protein L6 [Spirochaetes Bin 1 SA-8]  
MSRIGIRPVQIPQGVKVAVSPTS VTVEGPKGKLVQEYIPEVEIAVEGSTVVVNRKNDSKQ  
AKAFHGLYRNINMVGVSQGFKTLVLNGVGYRAELQGNLLVMSLGYSTDFAVVVPQG  
LAVTVEANGQKV VVSGIDRALLGKFASEVRSLREPEPYKGGKIRYEDEKIRRKVKGKTGVK  
\*

>SPSA8\_v1\_400004|ID:41145913|rplR| 50S ribosomal protein L18 [Spirochaetes Bin 1 SA-8]  
MSVKELSDKIRKRAKRKSVRKTISGTAEKPRMTVFKSNVHLYVQVIDDTAGHTLASAST  
LEKSLKDIGHTVEGGGKLGEEIGKRLLLEKGITTVVFDNRNGYRYHGIVKAIADGARKAGLK  
F\*

>SPSA8\_v1\_400005|ID:41145914|rpsE| 30S ribosomal subunit protein S5 [Spirochaetes Bin 1 SA-8]  
VERNREDAQPRDNFTEKLVQLNRTAKVVKGGRRFSFSALTVVGDHQQGNVGFVGFKANDV

TEAIRKSVEKAKRAVVHVPVKNGLTLPHEVTGVYKATNVLIKPAFPGSGVIAGGPVRAILE  
VAGYTDVISKICIGSRNSMNVRAVFNMGMDKLMDAKAVAKNRGKTLKDLWG\*  
>SPSA8\_v1\_400006|ID:41145915|rplO| 50S ribosomal subunit protein L15 [Spirochaetes Bin 1 SA-8]  
MSDYQLHAPEGANRKRIVGRGQGSGLGTTAGRGNGKQQSRSGGKTYPGFEGGQMPLYRR  
LPMRGSFNQPFKQVQIVNIGDLETRFQAGDTVDAASLLMKGLIRKPENLIKVLGKGLT  
IALNISVDAVSAGXKAKIEAAGGKVVETPTAVGSASDA\*  
>SPSA8\_v1\_400007|ID:41145916|secY| preprotein translocase membrane subunit [Spirochaetes Bin 1 SA-8]  
MAGNPLSDIFRIKELKDRILFTLFWLVVFRLLGAFLLPIPGINASALQSYFASQAGQSGGIT  
DYLDFFAGGAFKNFSLFMMGVMPYISMQIIMQLLLIVFPKLSIAEEDGGRKKISRWTRM  
GTIVICIIQGFSVTVWADRIPIAIAMSNRRTMYAIIAILTVTTGSMFLIWIGEQITKRGIG  
NGISLLIFAGIVARLPNATYELIKKIQAGEINAVYALVLLMFVGVVALVVLEQQGQRKI  
PVNYAKRVVGRKMYGAQNTYIPFKINPSGVIPVIFASSLLTFPLQIAQSFGVQAKWLRDF  
SYWLRPSGFWYNLFYVLFVFFAYFYTQVSLNPQEISKNIRENGGSIPGIRSEKMEEYLS  
RILNRILPGALYLALIALIPSLVQRLFNFPSQLAYLLGGTSLLLILVGVDLDTMSQIEAM  
LKMHHHDGLVRKGHRSRNL\*  
>SPSA8\_v1\_400008|ID:41145917|rpsM| 30S ribosomal subunit protein S13 [Spirochaetes Bin 1 SA-8]  
MARIAGVDLPNKHVEIALTYIYGLGRTSAKKICEATGVDPNKKINELSNEELNELRKVIE  
NDYKVEGRLRTEIALNIKRLMDIGCYRGLRHRKGLPVNGQRTRTNARTRKGRKKTVANKK  
KAV\*  
>SPSA8\_v1\_400009|ID:41145918|rpsK| 30S ribosomal subunit protein S11 [Spirochaetes Bin 1 SA-8]  
VAVTTKKRKEKKSVEYEGNVYIQATFNNTVITITDLNGNAIAWASSGTHQFRGAKKSTPFA  
AQTVAETVVQKAMNSGLREVHVYVKGPVIGRESAIRQLGALGLKVKVKSINDVTPIPHNGCR  
PRKARRI\*  
>SPSA8\_v1\_400010|ID:41145919|rpsD| 30S ribosomal subunit protein S4 [Spirochaetes Bin 1 SA-8]  
MARYIGPVCRLCRTEQKKLFLKGDRCCKSDKCPMNKRLPPGKEPKARMGKKSEYAVQLRE  
KQTLKRAYLLEKQFRNSFDKALAMPGKTGENLFILLERLDNVVYRLHFATSRAQARQL  
VNHGHIAVNGKRVDIASYLKAGDQISVIGQAKKLDMIKNALQEVAKSGTMPWVEVNPDE  
MVGRLAAYPHRQDITDMADIREQLVVELYSK\*  
>SPSA8\_v1\_400011|ID:41145920|rpoA| DNA-directed RNA polymerase subunit alpha [Spirochaetes Bin 1 SA-8]  
MARKNLLKGFKRPKGITYEQSESGDSYGKFVAYPFEPGYGTTVGNTLRRILLSSIQGYAI  
TAVRIVRYDDEGAQHIISEFETIPGVVEDTIEFLNKLQRLVRLPNDMEQAVFLYEIKG  
ISELKGSFFSNDRQLEVLNPDLTIAALNPDVHLDLEIQVDLGRGYVPAEVNEKYIEIVGT  
IPMDAIFTPVTKVKYSVEPTRVGQRSDYDKLVLEIWDGTTRPEDALGEAAKIAKDHFAI  
FINFDENEAGGDELNDEIEERVKQILNTPVEDLELSVRASNCLKNANIRTIGELARKTED  
EITKTRNFGKKS LAEIKTKLSEQNLSLGMTDFTPLRNYLKLTMKKEQTNEA\*  
>SPSA8\_v1\_400012|ID:41145921|rplQ| 50S ribosomal subunit protein L17 [Spirochaetes Bin 1 SA-8]  
MKHKIGFNKLN RVSAHRKALIRNMMTVLFKHERIETTHAKAVETRRAAEKMITRAKVDSV  
HNRRIAARKIQDEAILNKL FTEIGPRFKDRAGGYTRILRIGNRAQDAADMVILELVDQKV  
EEKKAERNKRKA EKKAKEAKAE\*  
>SPSA8\_v1\_400013|ID:41145922| conserved protein of unknown function [Spirochaetes Bin 1 SA-8]  
MSKAHRGKGVRELPSGRGTCVCKRDGVKVL YEQVEGKKTICKVCKATLANSK\*  
>SPSA8\_v1\_400014|ID:41145923|livF| leucine/isoleucine/valine transporter subunit ; ATP-binding component of ABC  
superfamily [Spirochaetes Bin 1 SA-8]  
MLVVKNLKVSYGKIEAIKDVSEFVDPDGKIVTLIGANGAGKTTTLRAISGLEKCAAGSIEF  
DGKNVTNMEAHKL VPLGISHVPEGRKIFPTLTVRENLELAGWTLKDKKLIKERMEDVFEV  
FPRIKERANQLGGTSLSGGEQQLAVGRALVTGGKILLLDEPSMGLAPVLVDEIFHQIVEI  
NKRGMTVLLVEQNAAEALDIADFAYVLEVGYTTISGTAKAIAEDPRVREAYLGV\*  
>SPSA8\_v1\_400015|ID:41145924|livG| leucine/isoleucine/valine transporter subunit ; ATP-binding component of ABC  
superfamily [Spirochaetes Bin 1 SA-8]  
MSALLSIKNMTHYFGGLRAVSNFSYDIPQGTIYGLIGPNGSGKTTTFNLITGIYTPTEGQ  
VFFQDKEITGMKPYKIVQTGAARTFQNL RIFSNLTALDNIRIALHFNTRSGLVSSVLRRLP  
SFMNEERQVKKESRELLEMLHLSRANELAKNLPY GELRRLEIARALATKPKLLLLDEPA  
AGMNPKEVDELMSLIVRIRNEFKVTVFLIEHHMQVVMGICEYLVKVIDFGETIAEGLPEAV  
GKDPKVLEAYLGKRGGA\*

>SPSA8\_v1\_400016|ID:41145925| Branched-chain amino acid ABC transporter permease protein [Spirochaetes Bin 1 SA-8]

MTKVKLPKFLIASVVFYAIEALFRLEVLNGYILHIINQSLIFVILAASLNLINGITGQF  
SLGHMGFAGVGAYVSGTLTTIILKLNPTVTSNMGIFVLCLLAGGVAAAFIFGLIFGFP  
LKG DYLAIVTLGFG EIIRTVFNNDIVYGGPRGLLGIPKFSNFTLIFIAAFLSIVVMRNII  
QSSHGRAMLSIRENELAADLVGIN TTQYKVM AFTIGAFFAGIAGLLAHLIQLAHPTQFG  
FIKSVEVLIM IYAGGVGSM TGSIIA FGLTFLSEGLRIGIRALADATNLP IGG EW RMVIY  
SLLLIFIM LFRTEGLMGT KESRIIKIEEAD\*

>SPSA8\_v1\_400017|ID:41145926|livH| leucine/isoleucine/valine transporter subunit ; membrane component of ABC superfamily [Spirochaetes Bin 1 SA-8]

MGSIFNAQQIVNGLQVGSYIALIALGYTMVYGIVRLINFAHGDFMIGAYAAAYGSFFIFN  
SMLAGKHGSI AFLVLIVSMLAGGLIAMLANQLAYKPLRYKPKLSSLITAIGVSMFLEYFF  
SALPVIGPSYRSFPDIIPKVQISLGSATISNYVVIDIVVAATLMIGLTFLVRKTALGKAM  
RAVSQDKDAARLMGIDIEK VIGFTFLIGGSFAGAAGLLAGMTYPRIFPYMGIQPGKAFI  
AAVLGGIGNIPGAVLGAYIMGLAETFASAYNSLLGEGIAFAILIIVLLVRPRGLLGEKVA  
DKI\*

>SPSA8\_v1\_400018|ID:41145927| Branched-chain amino acid ABC transporter substrate-binding protein [Spirochaetes Bin 1 SA-8]

MKKFTLVLLAVLAASLVSAQDIKIGGVGPVTGEAATFGVSTKNGMAMAVEEWNAMGGVVF  
GGRKVKLIFEDDKGDPAEGATVYTKLIQQDGVVAIVGTVMSKVTLGAPIAQANGIPMIS  
PTSTNEKVTLVGDYIFRACFIDPFQGTVGASFA YKDLKAKKAAAFDLGNDYTKGLAENF  
KATFEKLAGKGSVVAYEGHPSGATDFKAQLTKILSAKPDVIYIPDYNDVGLIAKQVREL  
GFKGPLVGGDGWSPDLVKIGGTAVENGFFTNHYS AEDTRPIVQDFVKKYKAKFGAEPDA  
LAALGYDAMYIMLDAIKRAGSTKGT AIRDALAKTDLNVVSGRVTFDANRNPVKS AVIIIEI  
KNGKQVYKTTVNP\*

>SPSA8\_v1\_400019|ID:41145928|yoyE| Uncharacterized transporter YojE [Spirochaetes Bin 1 SA-8]

MKNQTSKISGTLAAFLAYGMWGLFPLYWKMLKSVEPLQILSHRIFWAAVFLILLGALKQ  
LSRIGELFKSPRKVLRVAACAIVVTANWGIYIWA VNSGRITESALGYIINPLLSVAFGV  
FFRERADVWTKAAVSVAALAIFAAAVIYGSVPWV SLLAVTFAGYGALKKQLALDPLLGL  
TIETLMVAPLAFGYLAIRQFQGTGAIFNASLLVT ALLILAGAVTAIPLFFAKAANSISL  
QKMFGIYQVSPTGQLFLGLVVFHEKPTSALLVAFAGVIAAVL MYALTRKRVAEKAQFAAN  
\*

>SPSA8\_v1\_400020|ID:41145929|hutI| Imidazolonepropionase [Spirochaetes Bin 1 SA-8]

MRGNGKGFCAIINIGSLASPQGRQAAGTAMNSLYRCKNACIVAKNGIIYAGPASAEEG  
RLALKKAQAEGAVLIDAENRACVPGFIDSH THFIFAGYRADEFFWRAGGMPYMEIHRRG  
GIRKSMEATRSATLHDLIEAGKKRLDTMLALGVTTVEGKSGYGM DLET ELRQLTAMRELS  
SLSPVEILPTFLGPHSIPPEFESRPSDYIDFVIREVLPKVAADKLA VFADIFCEKGVFEI  
EDSRRYLRAAQNAGFKLKLHADEIVRIGGAGLAE LGAVSADHLLKASPEDLQAMAQKAV  
IATCLPLTAFSLREPYADARGMIDRGLAVALASDLNPGSCYSQSIPLIFAIAVL YMKLTF  
EETLTALTLNGAAALGLAASHGSLETGKTADIVILD APEPEHLSYHIGMDLVHTVVKRGE  
LVYQQSTKA\*

>SPSA8\_v1\_400021|ID:41145930| conserved protein of unknown function [Spirochaetes Bin 1 SA-8]

MRFFIEATEADPHFEYFAAPDKPRIVNGAPT KNPRYLQLDPNYVNPQSRYLAEIGPRLYR  
RVPADNALLHPVGA VLPGRNNPADPAAGIRPLAVY GPIHYQDLPELFMDFVCSLTGKSP  
STTGAGSEGALTKGPFNALIATTDLNNALLS FILTGYSGFTTAAGYIGHKYKIDHDISIM  
MPELWARLSPEERDPEFLKEHGYLEKVDDFEYEGRLIPASRLGW RITPLFAATYLGR LFD  
TPTAVFPEDMLRPELQSMPEYVDGIENIASAMKKS AEAYFEDGSVEAAIPPLKAVLHVMA  
KGHYEGKSIDPEVRMLFTRDYVLASDWYHERLER YRNSEIEYLEKSIVYLRSFLAEKAE  
PQSLSAKRAQAELLRARERLERLMDKNYLSIIDGSLGKDILYEKA\*

>SPSA8\_v1\_400022|ID:41145931| protein of unknown function [Spirochaetes Bin 1 SA-8]

MDRTVDSEGADSCRRIGRVIPASRQDGSYRMQQRV VRRYSAVEPRSDFRQISALRIDIW  
VKLEVS WIFCRGAVDNSRFIRCKIFKMGISFRCFNEKAHCVGIFREL YGFFDDLCSMAA  
GEGFEIADEIVLAGKILFSLLVIAADDGVIGALEEACFGVFAE FEAGMAVCP IREVFQXX

>SPSA8\_v1\_410001|ID:41145932|pgcA| Phosphoglucomutase [Spirochaetes Bin 1 SA-8]

MFTSLRPTPELSFAIRELGADTGVVVTASHNPPQYNGYKAYWNDGSQVPPHVDVGIIKVV  
MAVKTPKTIDKESAIKQGLLVYLDSDNRYVAMVSKLLRPVLIKQEASKVKVYVYTPLH  
GTGAMLFERIMGELGLNVMTVPEQRNPDGEFPTVSYNPEEPAALKLAIGLGEKVHADVV  
MATDPDADRLGVAVPDKKQIFQLISGNQLGSLHLDYLLHSLSELGKMPPKACIKSIVTT  
ELQAYIAAKYQVECLDCLTGFKWIADVMRQLEKEGKTFIYGTEESYGHLIETEVRDKDGI  
SAAALTAEMTLYWRSGKSLLDRLDEIYLEHGFFQEKGINKYFEGPRGMTIMSGIMETYR  
SNQPIALGGIPVVHIRDIKTGLAWDVGSSVTKKLDLPASDVIQWKLDRDGTMTVTRPSGTE  
PKIKYYILCRTEASIGLEEAKKQSALKIAAIEADIRKVIDSAK\*

>SPSA8\_v1\_410002|ID:41145933| putative DNA-directed DNA polymerase [Spirochaetes Bin 1 SA-8]  
MGDSSYGEPIWAWLMKPGPSDLDTLSRQAWVSAEPVQPAVEGCPLPEDWDRLSYAAFVDE  
TTGLYPGKDRILEVGIVLFSFDQEGAITEEQSYASLVNPGIPVPASSSAIHGITDLDVAS  
APLFHEIAAEVARLLAGRNVFAHNAGFDGFLKQEFNRIITQPQEATLWTGDEQTPEILS  
FTQSLTMTLADTSLKLANPALLSYNLGKAAFVLGIETGTSHRALDDARTCMNIFAYA  
ARKLTGKCP\*

>SPSA8\_v1\_410003|ID:41145934| protein of unknown function [Spirochaetes Bin 1 SA-8]  
MNRFRQGFLLAILPLAMLLFGFISSWQKLAVEDGLILFSAAFDARSLSSDDIESFSSR  
EASLYLQPSILPMLSERIRLLAVQLTEKALKSGKAPRQAVASILPEPAKIIAMLARTRD  
IDDFEDFTTIEGSAGKYAAVTSAAPVMKPLRKSYEIIFEAFAEMKKLGQVRNAIQDYA  
LTAEYRSGITLTGLSSRPLKSQYDLAHTFALDIFLQDVEVNPVNGLQKGMIFSLSDGLV  
IAAEKNWRGGETLEEYGGGISPAGNGVIIYDPSQRKYFSYFHLHDVLEPGDAIQKGG  
PLGYGGNTGTNARKKKGHEHVHVEIFDAVLGKNLRNSEIAAVIFSR\*

>SPSA8\_v1\_410004|ID:41145935| putative Glucokinase [Spirochaetes Bin 1 SA-8]  
MKPNTDSYVFLAGDIGGTNSNLALVRYKQGAFTLEYFQRYATQQENSLDPLARFLDSAK  
KAGFNAPLSACCVSAGPVVNGEIQLTNAPWTIRQSEIQNLLGIPTFLINDFTAVSYAAV  
LLNTQDKQAVTVMPHSDGSQPQPGIGIALVVGAGTGLGTGFIQKNVDGSYMAFASEGGHS  
ELPCYDDL SRAFHSWMTDKLGTAPGVELAVSGQGIGNIFSICSSAFSKSLIGERYSLAY  
QALNMELSQT VSSILAKPEAERPALIAANKTNDWRCAL TMEVFNFYARKVSGLASIFLP  
SGGIYLAGGISSKNEAFLLENHRFMRIFEENYAPHIRSFLK GASVMLVRDYSISLLGAAN  
AALQLSRN\*

>SPSA8\_v1\_410005|ID:41145936| conserved protein of unknown function [Spirochaetes Bin 1 SA-8]  
MTPISEALRQDMAAKGIDIDLTL SILNDFNNGLYDSLKPVKAVSVPKIDGSTVIDTRLFA  
AGKASVYRTDRDTASRALADAGIPMPKTAISEKSV DGDILAFPT EALLDIGYSLLPKTA  
FGVLNGGSATS YADTKKNKALGDQVFSILEAKFHELAPSCKDVPKGITPAYTNP DGSPGY  
SFLELKMRRARLALAKRCIKRMGVGTVC KRQGLEFLPLFQMSSSLNDEQLKAHYDAVQSSP  
LLAGLAKETGLEPAQWHTGIQPMIAAYSHSSCGRPKTIFDTAWGKPDSTLPLPGGHGQFF  
RILAPVLKAFHAQGIRFACLGNDVNI GYMPDPVELAILLSGKSAAFD FSRTELDVKGG  
ILVETDTGSR TIADIGPAISVEEVARIEQAGYSILFN CASGIFDL DYLVPRIDHLARELP  
VRFSDQDKDAGKYSQAEQVTWEITSL LPSFLAFAVEKNERFLAAKLLVENLLTSGIGLGD  
PGMPPAIRAASEKLHAGLERLLTEQYGLILKNGRYLPDLPV\*

>SPSA8\_v1\_410006|ID:41145937| putative Molybdopterin oxidoreductase [Spirochaetes Bin 1 SA-8]  
MEMVPVFCGRDCGGDACPLIAVVENGGVIRIQHNPEGRIMKACPKGFLPHQHYSSERLL  
EPLVRTGSRGSGQFRAVSWKEALSLVKEKLENTIER YGPQSILSLASAGSTGALHNTETL  
TKRFLNCLGGHTSLSGNYSSNAANYALGKLF GTSYGYSGFPPESLLGAETIILLGANILE  
ARLGAAYA EYLEEAAKAGKKIIAIDPRKTKTASLEGA EWVPILPGTDSALLYAILQRLEA  
DSRIDHAWLAERAEGAEEIFSYIDGKTDGIKKDADWAEQQTGIPAMTIRKIAQIYISNHP  
VLLFPGYSIQRTQFGEEAMRLAVLLQLATRNFGVFGG STGSLNNKLPGLNVGKMDDLGRG  
NNQSVPI LRWPDVLEGQPRYPDIHVLYSAGGNFLNQGADIRKNIRAFMKADFVVSHEMF  
MTPTARCSDVILPVKGPLQKEDIGIPWAGNYLLYK PQILKVRGKEKSDYEIFSM LASMMR  
VEAEFSKGRSEHEWIAQFLQASEVSDAESFMKKG IWFVFGDRYDISYMEKFLFNPQGNPLGT  
RSGKLEFTGDRARFDAPKHSEFSLVTPKRHN FVHSQGGDFAELLKNNPLQVNSNDARRLG  
IKEGDCVKVSSETGWLLAHVHISDEIRESV VSLHEGTWFEEKTD TQDCCDAVSPSPNLLT  
STAGTAESCSCVMHGVPVSVSRVN\*

>SPSA8\_v1\_410007|ID:41145938|lon| Lon protease [Spirochaetes Bin 1 SA-8]  
MAENEIIPIDQVLPNKLPITLIGRPIFGIFTPIMIANQPDILVVEQAMSADGMVGLVL

AQDENAPLDSANLYQVGTVAKIVKRINLPDGGINIFISTLKRFKIKKFLSKEVPIVAAVA  
YLDDYNDSDSEIKALTRALLGEMKQISENNPLFSEEMRLNMINIDHPGKIADFIASILNI  
DKKEQQKVLETLDVHERMERYLIFIKKEQELLRIQKKVQAEINEKIEKSQREYFLKEELK  
AIKQELGLPSDAKSSDVQKFRAKIDSFQFEGETKELVEQELEKFLMDPSSSEYMVTRNW  
LELVCSLPWNSPLSNDFDMKAAQEILEADHYGLKDVKERIIEYLAVRKLKDKSKGSILCL  
VGPPGVGKTSVGRSIARAMGKEFFRFTVGGMRDEAEIKGHRRTYVGALPGKIIQGLKIVK  
KRDPVFMIDEIDKMGVSYQGDPSALLEALDPEQNFSDRDHYLDLDPDISNIFFIVTANT  
LDTIPRPLDRMEIIQIPGYVDSEKLEIARHYLIPKSLEKNGLKKADVRYTRDALVFIAE  
SYAREAGVRNFEKYLDKIHRKIAKSIVLEETKEKKAVIDKAAVQKYLKPKIFRDDDIIKA  
TRPGMAVGLAWTSMGGDTLIEAVANPGKEGFKLTGQMGSVMQESASIAYTFIRSIAAQK  
FGIGADYFESRQIHLHIPEGATPKDGPSAGITMATALLSLVTKKKIKDRLAMTGELSLTG  
QVLPIGGLKEKTVAARRNKIKDIIPAANQNDLDEIPEHIKKGITFHPVQRMEEVIELAF  
NL\*

>SPSA8\_v1\_410008|ID:41145939| putative Adenosine kinase [Spirochaetes Bin 1 SA-8]  
LEKQKGGIVTLGHLIDHITLVQTKFIENLGLERPVIYHTNSAELRKILTALQNAPAEMLK  
SHTKSLGGGVAICAKTLASLGIRTTLLGSVGADEDAEFLRHALDQYGILYELGTSLKATG  
VFCMQTESNAKWLVSPEAARDVRGMVIDEKLWSNNEILYIDGLLIDDVQWLAAIADSA  
VRHGLILAMDISTVDNARYNRNIIISFAEKYCRYVFANEREYSVLKLTSSQLASSKVYWI  
VKRGPKGATAIFQNRVEHASSYSVTKIVDETCAGDAFAGGFYGLMMGLPVRHCLSLGNS  
AGKLAVMSCGSLFDQTAMRKTLMTALERLLF\*

>SPSA8\_v1\_410009|ID:41145940| putative Adenylyl cyclase CyaB [Spirochaetes Bin 1 SA-8]  
MIEIELKARVSDPAAVEARINSFLSFVGTVDKHDEYWSIPVLSSMVLTTGFRFRIRHEAE  
NTLITFKEKTYTNTIEVNREVEFGVQNEAAFRKFIEKMSARHLYSKQKKGKQWKGEENLL  
AELVAVEGLGNFLEVEMLFEDGSKVKPESVKKNLIEIIEICGLSASDIEPRPYSQLLGMP  
KY\*

>SPSA8\_v1\_410010|ID:41145941|gpmI| 2,3-bisphosphoglycerate-independent phosphoglycerate mutase [Spirochaetes Bin 1 SA-8]  
MVSALKKNPGWKGRKGPLVLVIMDGVGYGQYKEGDAVANADMHRHFRSLEASCPTTKLKAH  
GTAVGLPSDEDMGNSEVGHNAIGCGRVFAQQAKLVASAIETGAMFQGPVWKDIIAQVKNR  
DSSLHFLGLFSDGNVHSHIDHLKAMLKRARDEGVKKARIHILLDGRDVGVSQSALDYIHPF  
EEFLKGLSTDGFDYQIASGGGRQYITMDRYGANWEMVKRGWDCHVCGIGRKFSSAEEAVL  
TYRKENPQVIDQDIREFVIHNDNGPVGTTINDGDALIFFNFRGDRALEITRAFEENFTFF  
DRGKKPDIYYAGMMQYDGDGLGIPAKYLVSPPAIDRTVGEFLANSVKSLSLAISSETQKFGHV  
TYFFNGNRTDKFSEELDYIEIKSDRVPFEERPWMKCAEITDKVISAIESGTYQFIRLNF  
PNGDMVGHTGVYQAVICGMEAMDQIGRLAKAVEKAGGILILTADHGNSDDMFEDKKT  
AVLFDKDGQPKAKTSHSLNPVPCVIYDPGFQGEYDTRLVSGLGISSLGATCINLLGFVPP  
EDYDTSIVRMIHLSKDNQA\*

>SPSA8\_v1\_410011|ID:41145942|apt| Adenine phosphoribosyltransferase [Spirochaetes Bin 1 SA-8]  
MTQEIEATEGFNLDDAIRKVQDFPKPGILFYDITSVLANPPAFNYCIESMLKLYRHENID  
AVAAIESRGFVFAAPFCQKLGLPLLLVRKKGKLPKGTISQSYDLEYGSAELEMHIDDIKP  
GMRFLIVDDLIATGGTINATCSMIKRCGAVPVRAFSVIGLPFLNYQQTIQDVSVDTLIEY  
FGE\*

>SPSA8\_v1\_410012|ID:41145943| conserved exported protein of unknown function [Spirochaetes Bin 1 SA-8]  
MKLKCWYRGLFLLCVLFILPLGSAFAQQGRAAGTDSILMITQPAGTPIPLTRLSDTSGQT  
VNQSPKLSKGSALGRFITISFGAFPFFMFFYTNLAFDVFTEFAASGFDLQYAPWPVQNRFS  
LPISQQLRIGIASSVSLAIAVLDAVFPAPQRK\*

>SPSA8\_v1\_410013|ID:41145944| YggS family pyridoxal phosphate enzyme [Spirochaetes Bin 1 SA-8]  
MRYHADMTENYGFVQDNVRSVLENIDAALRRAGREPSSVTLAVTKFHPQEAVLAAYAAG  
IRFFGENRVQEAMKFDSEFKTIIPDAKLHLIGTLQSNKINKAIGLFCIQSVDSEELLM  
SLTRKATERDKMLEVMLELHTGEASKAGFPDIDAMLRAVESSLKMDAASVNIRGLMTMAP  
FTADSQNIRVSFRKLASALKTLREHFNLDPCTELSMGMSNDYKIAIEEGATIVRIGTALF  
GERT\*

>SPSA8\_v1\_410014|ID:41145945| protein of unknown function [Spirochaetes Bin 1 SA-8]  
MDGVTVLEKKLDTIWSADGYAPFNKPPSKNSLDAHGRLIIGELDLVRGIHVLDIMAAD

FSGNAASVQLRLTVE\*

>SPSA8\_v1\_420001|ID:41145946| protein of unknown function [Spirochaetes Bin 1 SA-8]  
LPGKSEEKLSVLSFAFQTSKGNVEFPAFPRQYASFFERAGEYLESPITGVLKAGMSAKF  
VYISNAKKVSLIHDGNFIPLDENPASPRFELELKVPKTELLKLGVSEDGVNFSIMLSWS  
VR\*

>SPSA8\_v1\_420002|ID:41145947| exported protein of unknown function [Spirochaetes Bin 1 SA-8]  
MKKFVLVVMALLAATMSFAAGKLTLMQKKPEIDAQLKAYAQAQAWGQKMA\*

>SPSA8\_v1\_420003|ID:41145948| Extracellular solute-binding protein family 1 [Spirochaetes Bin 1 SA-8]  
VTVVVKSIGGTSGGMGPQLKADYAAGDMPDIFAFDGLAAYKEWEGVILDLSNEPWVKNTS  
VAFKYNSKIFGFPVAVEGWGMAYNADMLAKAGIDPKTLVNYDGYKKAFAKELDSMKAQLGI  
NSVVSMAAAVEMGWVTAHHNFNSLLSNGLPYGDLSVVNALLAGNVDMQRLQEYADWVELL  
FKYADKSVLLTGNYDAQVGAFATGKAVFLHQGNWTDPNIKGANATFKMAFAPHGSMKKAT  
DGIFVAAPSFYAINKESKNLALAKKFLVDLAGTPEGAQYMVKEAGMIPAFSTIKLNPDGQ  
LSKSVQEWAAAGKVYSWNQYYFTGDFRDKVLTPINQFAAGKITKAQFIDLMAKAFKDNA  
KK\*

>SPSA8\_v1\_420004|ID:41145949| amyD| putative starch degradation products transport system permease protein  
AmyD [Spirochaetes Bin 1 SA-8]

MTKKTESRSLVFWIFLAPVLIASFVMVMIIFFLGTYYAFTNWTSSARADSTLKFVGLSNFI  
SSFKDPAFFYSFGITFLYTVLNMIAINVAAFLAMLVTGQLKLNKYRVGFFVFNLIIGL  
ILGYIWQFIFNNAIPSLGKAIPFLNFMADPNMLSKNTTALLAMIIVGTWQYAGYIMMI  
YVAAIENIPQELIEASKIDGATPWIRLRAITLPLCAQAFVTMFLTLVNSFKQFDVNVSL  
TSGGPSTMLFGQPILGTELLALNIYNTAFISNNLSIAQARAVVFFLVLAISLIQVYVVK  
KKEIEL\*

>SPSA8\_v1\_420005|ID:41145950| ABC-type transporter, integral membrane subunit [Spirochaetes Bin 1 SA-8]

MIQEKTRKPGVVAEIFTALLFILFLFPFLVLINSAKTAFEVTQFPLAWPEKWSNIFNN  
VVRIWTNEAVRYPSSLLASTIITVVSLLVNLNLSAQAQAWVLVRTKTKVSSAIFVFAAM  
VIPFQIVMFLLSWFRTVTSITGIRLLRITYQGIILSYIGFGAPLSIFMFHGFIKSIPEL  
EEAATIDGCKKHEIFYKIIFPILTPIQATVMVLNGIWIWNDYLLPLLVLGKGNNDIMTIPL  
AVSNFAGAFVKQWDLILTALMAMIPVVIFFLFAQKYIVKGMVAGAIK\*

>SPSA8\_v1\_420006|ID:41145951| conserved protein of unknown function [Spirochaetes Bin 1 SA-8]

MKKAWLLVIALAMVALMGSCDLFGTIKAADILGEWEFLQVTDIKGTEVFNVHLSVMADES  
GKIVMLDLGWDIHDGEDLLIRWHGLNGTFSGKKFTGTYKAFYLGDEYNIIEVTFYKNGE  
IGIACKGEGPLNGVTLEHGTKAEI\*

>SPSA8\_v1\_420007|ID:41145952| Dihydrodipicolinate synthetase [Spirochaetes Bin 1 SA-8]

MPTARETLITTLFPTGIPSLWCPPLTHFSEDGLIDAERIKAHLAHLRPSVPCLLVPGSTS  
EGWELDEAEFEFLDIMLACAREMDFSIMIGMLRTQSGEARKGIIAMLNHVFKSESPSIQ  
MLIERNICGFAVTAPKGNLPQSTIHEHLQEILNLSLPTALYQLPQITENEISPETVAAL  
VSNYQNLVLMKDTSGKDRVVTSGLNFDGLFFVRGAEGDYAKWYKPAGGRYDGFLLSSANC  
FSRQLKSVLQYIEAGRLEDAEMVSNRVSEVMTRLLQAASALPFGNAFTNANKAIDHFFAY  
GPHAELSAKIRTRSGAFLPRALLEETRTVLRNFQLMPSKGYLE\*

>SPSA8\_v1\_420008|ID:41145953| putative Membrane-bound serine protease (ClpP class) [Spirochaetes Bin 1 SA-8]

MKFNPSLKS AFLFCTTFLFSILNLIPAAAQPRDISFGGMTWGLRQTAGPVDPGPNTFSNL  
QDQVWVDAQGSVHLTLQKRGTIWTASEMMAKKDTGYGTYRFTVSASLADLDPNIVFGFFT  
WDKAPEAFNREIDIEISRWGIPDGPDWFTVQPYDRAGNQHSFYLPANSYTFELQWAPG  
VVRFSLTLDKNNKEIWTYSGAGVPEPGRARLRINLWFRGKEPAQLWKHYEVVISDFSF  
PLI\*

>SPSA8\_v1\_420009|ID:41145954| FAD dependent oxidoreductase [Spirochaetes Bin 1 SA-8]

MAEGMMGIKREHNLLYKHGDMMKKKVVIIGAGLSGLATATLLAKRGFAVSVYEHAVQPG  
GSSGAFKRGNAIFDVGSAMMFGFGPTGFNPHSLLFNEIEEPIAVIEHSSMYRIHFAGQDV  
VFHADVESFLHALERLFPDDIADIRRFYAYLQHLYFDVVMKDPSSLISPSEIPLMEMQTRF  
FKDPVTQMKIIPLLFSNAASILRRFTQSVPMQFFDKLTSTYCYTTMEETPAIMAVTMFV  
ENHRSGSYYIHGSTQVYVGKLEKAIKEYGGSVYGAIEVALEVEGGKVRAARLADGTNIE  
ADYFVYSGTVWNLYQKLLPSDAVPPVLLKKVSETVPTSSIVLYATVKKEAFPEDIGPIE  
MLVQDTDALTESEITLYIPTIDPSLNEPGCHSILAIGPSFRTWSPETLAKGDPKVVAA

YENAKQEEAERIIDYLASYYPAFKANLVDWEIGSPVTIERYSLKNKGSVAGPKQMVGQDL  
MHRQHAGTRWKNLFCCESTTMTGTGTPAVVISGISAADVILRREGLPEYRYFSDKGFVQY  
LKSPAPAYAQEGLGKIGNLCLWCEHDACRQVCPQDMDIRGIFRRLYSXNLEGARKLAKFS  
EGSAGELVCLCEKTPCVKACRRRTILGKSVPIPVSLAALFSRAQHRESS\*

>SPSA8\_v1\_420010|ID:41145955| Zinc/iron permease [Spirochaetes Bin 1 SA-8]

MCMLEYLKTLSPVMQTLAATLFTWGVVTAALGAGMVFVFKSIDKRVLDSMLGFAAGVMIAAS  
FWSLLAPAIELSEMGLIPWIPPAIGFLSGGIFLRLVDRLLPHLHIEYKMEEAEGIKTNW  
SRSILLVLAITLHNIPEGLAVGVGFGAVGASIGSASLAGAMALALGIGIQNFPEGAAVSI  
PLRRDGMSRSKSFYQASGIVEPIAGVLGAALVSTMRPILPYALAFAGAMIYVVAEEV  
LPEANRDGNHGLATIGTMVGFVMMILDVALG\*

>SPSA8\_v1\_420011|ID:41145956| conserved membrane protein of unknown function [Spirochaetes Bin 1 SA-8]

MLTTHDRVLAIFVSCSIALFMLMAILSNGMVPVAVTGFVQLQISPARLISDFTLMANPGAA  
LLNVSMVGILGLLVLRNLRIQLSGPSLAAVFTMMGFAFFGKTLNLCIPIIIGVSISALIV  
RKKPREYVLIALFGTSLGPIVSFIAFELGFPPIALPLSFIIGIAGIVLPLAIAMLHL  
HQGYNLVNVGLTAGFGLFAASIPNAGGVDISTFATWNTGRNIWLFLLIPIVAVLALALS  
IALGAKKSLKEFLSIQKMSGRLPSDFTEMAGKGGALANAGLLTLLYWFFMLIIGAPFNGP  
VLGGLLTILGFSLFGKNILNNVPIALGILFAVILFGKSISTPWIVLAFVLTALSPVAGE  
FGFSAGLLAGFLHLVVERTGAWHAGINLYNNGFSAGLVATLIVSVIEWYKTNIEQ\*

>SPSA8\_v1\_420012|ID:41145957| conserved protein of unknown function [Spirochaetes Bin 1 SA-8]

MKRREFLVHLISEVSSFLLQGNPRKMVVSLSHQEADGIHLAVLDDRPRSDAEIAEIEHSLN  
TARRPELAGYYGQMAGQDLLGSARLNLVGWQIKHADVLKTPEGGVMLNLWIGGEGFEFDK  
FNLSKGTQE\*

>SPSA8\_v1\_420013|ID:41145958|sbcB| Exodeoxyribonuclease I [Spirochaetes Bin 1 SA-8]

MASSILWYDLETFGINPSYDRIAQFACIRTNEELEEIADPIKLYCKPALDYLPSPQACLV  
HGITPQAAHELGETEYDFAKKIHFEFSQPGTTVAGFNSINFDEFIRFLFFRNLFDPYER  
EYANENSRWDIINLVRATHDLRPEGIVWPKDNNMMPVFKLEALTRANGLDHFSAHDALSD  
IRATIAVAKLIRTRQKKLYDWYYSHRKRESLKPVIDLPSRKILLHTSSEYTTERGCTTLL  
APIGMDQANKNQLAIDLRYDPERLLDLSAEEIRKLVFTKAAELDEPRVPLVRIKLNHCP  
FLAPERVLSAEAAQRLGINRDECSRADLIRNNPNLIQKLQAVFEIPMEFPSIEDPEASL  
YSGNFIPKPDERSKLRHLIELIADSGGAAAGRDFVRNSKFSDERIPRLRRFFARNFPETL  
TAAERLKWRYCAQKIQLPPAEGSAELADYGKLLQSFLDNPELPAPKRAVVHSLLDWKFF  
LEKELLAYDEAVSKLNSNP\*

>SPSA8\_v1\_420014|ID:41145959| protein of unknown function [Spirochaetes Bin 1 SA-8]

MKRILFVVFAAFLWWGGGACTKAFAEQPGAIFMTVQVESAGIREKPAVLSSIIATTRY  
GIVVKVFEIREGWAKVEIPGQTRIGFIFATSLRKVTIPEGQMAAPLQGVVAPQVVLGKG  
FAPINANPATGMESRENSTQKQWLDSESLTIDPWEALAFVLGKAD\*

>SPSA8\_v1\_420015|ID:41145960| protein of unknown function [Spirochaetes Bin 1 SA-8]

MPKRYWWLTVSLIAALLFSSCLTSDSISMLVSKAVVQGLLDETQAAILKSAATEAVFAS  
RELSPEEEYYLGRAISGAILEVYRYPYDCPELTRYINLLGQGLALFSRPELYKGYHFLVL  
DSDEPNFAMPGGQILITRGLLSLTENEDELAAILAHEISHTALRHGVLSLQSYALAEAL  
REAAIKAGQAGSAEAVSFTNKFGTAISEFAAVLLVSGYSQNFYEADRTAQSIQLGYA  
PSSVAAVIMKLPDKEGEAANSFVITHPEKEARIGSLESSVSNLVLFSLSAVQRWREYGLL  
LREVEPDEILSVAPLGVV RADRYARYSLFFRKDAGK\*

>SPSA8\_v1\_420016|ID:41145961| putative Adenylate/guanylate cyclase with Chase sensor [Spirochaetes Bin 1 SA-8]

MKGSCIERRIEVLAISRAARILLVVGGLLLL YICNFSGIETKLQFALHDTAVRIEAQRF  
ENSMNSKSNRPDIRLIFVDQYSLTWVQENLGFSPWPVRELYGLIADFCSSQAQVQAVDVLV  
SETSIYGPDDDRRLAQALEQAGNVVLVATSQSGKLSSIPVERSKVEFGTARALVDSGVI  
RRYDARSSVTGNGVLPALGAAVLKKGKLSFPAAVYLKFLGASPGFEAYNAEILSAEL  
HRFDENKNIDPYSGLTSPEAFRNAIVFIGFSAPGLLDQQAVPVDSAMPGVEIHATFVENT  
LSGRLAYQMAPFSSWLFILLFGMLGAILPSVMRKTSLVTGFFLLAPLVIISNALFFSAG  
LVAPGGAALTLAFGSGLTGILLAYLAEGKQRAFLRRSFSFYLAPEVIEQLLNHPMLKLG  
GETRTITVLFSDMEGFTNFSEKLSPDVLAGFMNEYMTKVSEIILKYGGTIDKYIGDAVVA  
FWNAPLEQKDHAERAVLAAVEIIVALEESRGSVSNLVLPRTRIGIHTGRAVVGNMGSAKR  
FNYTALGDTMNIASRLEEANKGLKTSILISADTARYCMKSEVGKNNKYKLGAMGNKIVPG



KEQEIEVWQVCPFKSVSNLVLDGRQRDSTESPS\*

>SPSA8\_v1\_430001|ID:41145962| Branched-chain amino acid ABC transporter, amino acid-binding protein (TC 3.A.1.4.1) [Spirochaetes Bin 1 SA-8]

VGLYYSGFITHAQGGCMKRALFVLVLSIALVGCAGTAKSDTIKVGFALTDGDQAVWG  
ENEFNTVKMLFEEYNNAGGIEVGGKKYKLEVIGYDNKGDQEA VNVVKRLTGQDKVAIL  
GPNASGNAIPIAPVLEQAKVPDIATVATNPKVTVLDGKVKPYNFRVCFIDPYQGAVAAGY  
AYDKLNARKAAILYDVSDDYSQGLREFFKANFEKKGGMIVADESFNGGDVDFRPQLSKIK  
AANPDIIFMPYFFKEVALSANQARELGIKTTLMGGDGWPSDQLISMGGKAVEGSYFVNHL  
DYADPAVQDYKARYKAKYKTELNGYL VHDVALLVAGLQKAGKVNGEALAX

>SPSA8\_v1\_430002|ID:41145963|glmS| Glutamine--fructose-6-phosphate aminotransferase [isomerizing] [Spirochaetes Bin 1 SA-8]

MCGIIGYTGPRNTSKILLEGLRRLEYRGYDSAGIVVGKESKSGELTIKSVGKIAALKS  
IVPHNLEGSWGIGHTRWATHGGVTESSNAHPHTDMSGKIAVVHNGIENHTAIKSMQLQAKG  
CVFKSETDTEVIPHLIAQYYEGDLLKALLKALQHLSTYAIACIHADEPGRIIGARNGGP  
LVVGGISGEMFLASDITAMVAYTDKVVYLNLDGEIVDINAGAFITNRFEQHVDKAVDTIS  
WELGSIEKGEFPCYMEKEIFEQPESIARAISGRDLAENATAKLGGLNLGRKMLSDISRVK  
VIAAGTSWHAGLVGSFLEQVARVPAQAELASELRYRNPVVEKDSLWFTVSQSGETADSL  
YAMREIQRKGGTVLGCNVVVGSTIARESDGGIYVHSGPEIAVASTKAFTSQLAAFYLF  
MVARMRDMSREEGSKFLTALQEVPAKVAETLKQRDHVQRIAKKYCHAKDFLFLGRGILYP  
IALEGALKLKEISYIHAEGCSAGEMKHGTIALVSPELPSVFLVSDDFLREKTISNMREIK  
ARGGPVIAVGVVEGDLETEKIADEFIPVPRMDPRFYPFTMILPLQLLAYFSALELGRDQDQ  
PRNLAKSVTVE\*

>SPSA8\_v1\_430003|ID:41145964| putative Biotin/acetyl-CoA-carboxylase ligase [Spirochaetes Bin 1 SA-8]

MELPFFRFKSVSSTMDTARSLIQQLSSPAAVVARYQTNGRGRISGRTWEAKPGSSLLTT  
IMLPVSLVRPEALSLKTGLALSIALEQLTSAHELAGSSFLKWPNDILASGDHADPDSFR  
KLAGILIEQSAGWVIGMGINLQKGAYPEVLVNSAVSLEEILGIQPLSDQGEYLIRRTVE  
NILAFSANDEWRTAYISRMWKLGMNIRFAEGHPEQDKFSQGILEGIDSSGQILIRLTDGS  
LRSYSSGEISLVRSSAQ\*

>SPSA8\_v1\_430004|ID:41145965| 2-dehydropanoate 2-reductase [Spirochaetes Bin 1 SA-8]

MPKINKVLIVGAGAIGAAIASRIFDVNPDAVALAASGERKQRYLRDGFVNGKRYDFRLA  
DSAGATPYDLIILAVKNYDLES AIEEIRPFV GENTTILSLLNGITSEQILRAEFGKDAVP  
LAFIIGIDALREGNRIDFPRPGEIRFGDEKNDSDNLRPAIAEIAADFLKSHNVPYSIPNDM  
VRAMWYKFMNVGLNQWSAVLRAPYGVFQKNAIARDLVRETMEEVVALGIQRGVAISSAD  
IDSLFTILDTLGPEGKTSMLQDVEAQRKTEVDFAKVVVDEASCSGIPVPANAMLFRMIS  
CIEQSYADLAR\*

>SPSA8\_v1\_430005|ID:41145966|hflX| GTPase HflX [Spirochaetes Bin 1 SA-8]

VTELTDPKPKAERSLLVGIEKDTIRKAEAQSLDELKGLAKTLGIDVADSILVKLREKTA  
NLLVGS GKAQEIANAAEALNADSIIFDHILTPVQQRNWETLTKKKVYDRAELIIRIFSAR  
ALTKEAGLQVELAQLQYALPRLAHSYEELSRQRGGRYGTGKAGEQKIELDRRSIERRIHE  
IKEELKEVQMSREIQRKRERILLPRAALVGYTNAGKSSLLNALTNAQVLAEDKLFATLD  
PTTRRLTLSSGGTLLLTDTVGFVRNLP HGLVEAFKATLEEAALADLLIHVADASDPEVEV  
HMQTTEKVLSEIGAGMKPRILALNKTDIADPEKIDQWTRIHGAGIPVSAKTGEGLELLAK  
AIEQALTAEMGAYEFEPHNEYALVALIHREGSILSERTTDSGTRIVCRIPERILHRVEK  
YCVTNEAQDGGYDAENQ\*

>SPSA8\_v1\_430006|ID:41145967|argI| ornithine carbamoyltransferase 1 [Spirochaetes Bin 1 SA-8]

MPVNLKGRSLLTKDFSTEEIRYLLDLSHDLKAKKRAGVKG NLLNRKNIVLIFDKASTRT  
RCAFETACWDEGGNATFLTNSQMGGKESIEDTAKVLGRMYDGIQYRGFSQELVEDLAKYS  
GVPVWNGLTDDDHTPTQILADLLTIEEHIKPLSKVKMVYCGDARNNMGNALMIGSAKMGM  
HFVALAPRELWPNEKLTAEKAVANETGGKIEFFSIEDADKALAGADVLYTDVWVSMGEE  
DKFEERIKQLEQYRVTMDFVKKTG NPDVIFLHCLPAFHDTETA VGKDIQKKFGISEMEVA  
DAVFRSRHSKVFDQAENRLHTIKAIMVATIGDL\*

>SPSA8\_v1\_430007|ID:41145968| Aminotransferase class I and II [Spirochaetes Bin 1 SA-8]

MALSISEIGKAVLDTHYAVRGPIVARAQELEKAGKEIYC NIGNPQALKQKPITYIRQVL  
ALTEYPQMIERADSMFPQDAIETAKTILKESKHGLGAYS DSKGMLFVRKAIAEFIEKRDS

TTALKVESNPDHIYLTGASKGVQ TALRILIAGEQDGIMIPQYPLYSATITLYGGVQV  
GYLDESSGWNLSYKMLEEAYLEAHAHGVKIKAIVVINPGNPTGSVLSRENIEMVIQFAK  
THGLSILADEVYQENIYRPEDSFISFARVMTEIREREVSLFSFHSTSKGFLGECGHRGGY  
MEVRNVSQDVL AQITKLQSVSLCSNLPGQVVTYLMVKPPAEGSPSYSKYNEEKNSILSEL  
AKRAKILADGLNEIPGISCQPITGAMYAFPSIMLPQGR TDEEYXMALLEQEGVXLVPGTG  
FRQVXGTAHFRTTILPTEQILSVVEKIXRFHLAWK\*

>SPSA8\_v1\_430008|ID:41145969| PpiC-type peptidyl-prolyl cis-trans isomerase [Spirochaetes Bin 1 SA-8]  
MEWRASHILVKDRNLAQELLKRVKQGANFEGFLAREFSTCPSKSSGGDLGWFGPGKMVAPF  
EYACKNLGVGSVSDVVQTQFGYHIIKLTGKR\*

>SPSA8\_v1\_430009|ID:41145970| RluA family pseudouridine synthase [Spirochaetes Bin 1 SA-8]  
VKKTIELLHEDAAFLIADKPSGWLSINDRYDPDAPVVLN ALEKEFGKLFVVRIDKDTSG  
VLLFARNAQAHKILNDQFATHEVQKKYIALVRGVPDEAEWRCELPLRADADKMHRTIIDA  
RRGKDAVTRFKLLETLGQYSVVEAYPETGRTHQIRVHLAATGYPIACDPLYGDGKPILLS  
LLKRRWKGDIYEEKPLISRTALHAEYLSFSHPVTNALLEISSPLPRDMKAVFKQLRSL\*

>SPSA8\_v1\_430010|ID:41145971| protein of unknown function [Spirochaetes Bin 1 SA-8]  
VKIGKGAENSEKQSKNEENKGNNG\*

>SPSA8\_v1\_430011|ID:41145972|groL| Cpn60 chaperonin GroEL, large subunit of GroESL [Spirochaetes Bin 1 SA-8]  
MAKQLLFSEEARRKLLVGVETISR AVKVT LGPKGRNVLLDKKFGAPT VTKDGVSVAKEIE  
LEDPYENMGAQLLKEVATKTNDIAGDGT TATVLAYSIVKEGLKAVAAGMDPMGLKRGID  
FAVSLAVDEIKKNAKEIKEKEEIADV ASVSANNDKEIGMQIADAMEKVGKDG VITVEESK  
TMDTTIDFVEGMQFDRGYTSPYFVTNRDSMTT VFENPLILIHDKKISNMKDLLPVLEKTA  
QTGKPLLIAEDIEGALATLIVNHLRGTINVC AVKAPGFGDRRKAMLEDIAILTGG EVI  
SEELGLKLENTALSQ LGTAKTVKVDKDN TTIINGGGKQKDIQDRIAQIKKQIEETTS DYD  
REKLQERLAKLAGGVA VINVGAATEVEMKEKKHRVEDALSATRAAIEEGIVPGGGIALIQ  
AAIALEKANTAKLTDDEK VGYKIVKRALEEP IRQIAENGGVDGSIADKAKSSKKGIGFD  
AARMEWVDMVKAGIIDPAKVTR SALQNAASVAALLTTECAITDLPEKEKPAMPAGGGMG  
GMGGMDY\*

>SPSA8\_v1\_430012|ID:41145973| conserved membrane protein of unknown function [Spirochaetes Bin 1 SA-8]  
MEQLHFGILSIIPLLTIILAVTTKDVVISLFLGALS GTLIAVGGNPFYGLINLADRIAD  
TLADGWNIRVLLFTIILG LLVGM LAKSGAAYSLG SWAGKKIKSRTGALIFTWLF GIIIF  
DDYFNSLTIGTCMKPLCDAKKISR AKLAYILDSTAAPVCIAPISGWVAFVIGTYKAMPE  
WQGLGVGELVFFLKTIPFNL YAIFAIFMVLFITITYKDFGPMARSEARALKGIGL FDEEK  
YGTVVSQVESKVHTNNAKPFDFL VPIFAVIFIALFFPMTTWMGAVDGENIKTIGEAMAA  
IPLGQAFNDTDSSKALMYALIFATVFGYIYFILR KLLNLKAAGEAML DGFAMVPAAMIL  
TLAWTLGGVIKSSPGDGGVGLGSYLSEVVVNGNFPIQFFPL VVFILSCIISFASGTSWGT  
MGIMVPVSLPIIVQLAKMANMTPDQTVNA VALTIGVV LGGSVFGDHCSPISD TTILSSTG  
ASVPHLEHVATQLPYAVFVAACAMVGT VVGGFTWSALASIIATAIPFVAGTFLLPKWFGP  
KHYLE\*

>SPSA8\_v1\_430013|ID:41145974| Alanine racemase domain-containing protein (fragment) [Spirochaetes Bin 1 SA-8]  
MGAPYLEIRLDIIASNAQAI VDFCGSFGVEVWGVTKGCCGMPEVARAMLSGGVFGIGESR  
LANISRLREAGIDVPFLMLRLPHISEARSIVEAFDMSLNSEIDTIRALAAEARAMRKRHG  
VILMVDTGDLREGLWPDRVSETARKIADLDGVELVGLGTNLSCYGGVIPSEANLGLLVQL  
ARQIEQEFVGLKLYISGGNTSTLPLMASGKLPAGVNMLRIGEAILQGTESIHRTPWPGTR  
QDAFVLHAEVIEIADKPSVPIGERGQDGF GGYPVFEDRGLIRRAIVNIGRQDVLVENLTC  
LDKGV TILGASSDHMILDATHALQPLNIGD TVSFNLGYGAMLQAMTSPYIEKKPAP\*

>SPSA8\_v1\_430014|ID:41145975| conserved protein of unknown function [Spirochaetes Bin 1 SA-8]  
MGGYLAVKKLVSLGDIQAFIQYVRSFTQPISQIANISNVLQQTAAASAERVFEFLEEAEV  
PEQENALVPSGIQGHVEFRNVHFGYSPEKIIINDFSADIKPGQRVAIVGPTGAGKTTMVK  
LLMRFYDVNSGAILIDGHDI REYRRAGLRKLFGMVLQDTWLFNGTILDNIRYGRLEAAEE  
EVFEAKAAHADHFIRAFPDGYKTELNEETNISQGGKQLLT IARAILANPSMLILDEAT  
SSVDTHTEVLIQKAMNLMKGRTSFIIAHLSTIRDADWILVMNHGDIVEQGT HESLLEK  
GGFYAELYSQFEKSEAAEAV\*

>SPSA8\_v1\_440001|ID:41145976| conserved membrane protein of unknown function [Spirochaetes Bin 1 SA-8]  
MSIFEIIMLLCFGAAPFSIAKSLKTGKTGGKSFAFLVIVIVGYISGILNKILYKPDGVV

WLYALNASMVSIDAVLWLRNRKREKSAERAESAAGNA\*

>SPSA8\_v1\_440002|ID:41145977|uppP| Undecaprenyl-diphosphatase [Spirochaetes Bin 1 SA-8]  
MTAVKAILGLIQGLAEFLPISSSGHLALFKNVGLGQVPLVFDVILHMATLLAVVIVFW  
KRIVGMLKAFWLVFVSKGRAGLQIGDGDQGTQENLAVIPPLLAATVITAVLGYAIQKYFS  
DENIKFVAVRMLITAAAILGLTFFVKPGARKLGSIGIGRSALIGVAQAGVFSGISRSGIT  
ISAGIFSGLDREAAGEFSFLLSIPAILGALVLTLDKAGSMMAEVSAHLALAFVTAFFSG  
YLALKFFMKMVKNGLYWFAPYLLLAGAAGLLFL\*

>SPSA8\_v1\_440003|ID:41145978| Cell division protein FtsK/SpoIIIE [Spirochaetes Bin 1 SA-8]  
MARSDDESHGNAGKASVVVASPPSRQNRGNGKSAKSKRETSWSSPSKVIALLTALGAAY  
LVLSLFLALKWPQGWVFLNGLGKQILIRFSWAGFFLPLWLACA AVLIVLPGFYPRPTYFL  
GAAALPFLVLTIFARLSTEPGAFFENHPVFAAVGLSSLYAGVGFALSLVLVSLGYFKL  
NEWLNLKEHAKAKGATAAKSDVLARKAGSLKKKEPFFLRAKMRIQQWYADWRGKRRTKAEK  
QLRDAEALAANSFDFDLPAKPVGDMKSLNQQNGNQKTIEEGSPGFSAKAASEPAGPVQT  
KLDANGKEIEFTSVPPQTVSDGHSNAAGTDDSRKQDIKKILERKALKPYTVPVDGILNT  
YPDGQYWIIDEKTRRNAEVLRETLAEFNIEAEVTGIRKGPVITMFEILPAHGKVKISKITN  
LSDNIALRLAASSVRIVAPIPGKHAVGIEVPNDRAIVSLREIIEHEQFKSAKMEIPVAL  
GKDIAGEVQFIDLTPHLLIAGATGSGKSVCVNAILSVLYRRSPEEVKLLIDPKIVE  
LKLNDIPHLLTPVVTESKRAFQALQYCICEMERRYMLDKAGVRDIRSFNRKIKDKGLA  
QEKLPYIVVIIDEFADLMAQTGKELESTLARLAAMSRAVGIHLVLATQRPSIDVITGLIK  
ANIPSRIAFMVASKFDSRIIDMVGAEKLLGRGDMFLFSGAQDPFPVPMQGAFAVSEEVER  
AVEHVKTTLGEPEYIDDEIFYDEEEENAEPGLFDDGDGDPLFEKALEIVLQQGKASAFIQ  
RRLKIGYNRAARLVELMEERGIVGPAQGSKPRDVMRNPVGTGSRPPLLDPMDSDDSAGNA  
\*

>SPSA8\_v1\_440004|ID:41145979| putative Diguanylate cyclase [Spirochaetes Bin 1 SA-8]  
MEPLKFNIVSGLWLLFAIPVIINARKGLSRSEVRGSRAFGFLNLSIAWYLVFAALELMSR  
TIEQVLFTHLEYLALCAFPVEILAFTHSFLDIEFKLKKLVLFAAGVFSSAVLLLQWTTA  
RHNLFYANPRLIPYQDLLVIKFEKGPIYLLWVVALLMVITSAALLFIQRTFHARGLVKRQ  
LFIISVAMCLPLAVSLLYVFQVLPPIFDNLFSYILISILTSYALFKAKMLEFAPVSDDK  
VFEFLREGCMILDEHHTIININNAIDLLPNIGEKLIGKTIQQALPTCENLIASLVNDVP  
ATIECDGSVFGGPEHLTVKTSPIKAKANQVLGWLITMENTNERFQLLEELQHFATHDDL  
GLCNRRFFFEQVRKLLGTDPQVLTCAFIMLDIDDFKTINDSMGHQTGDGVLQAVSVCIS  
QTITPDALACRFGGDEFLLFLPGLDLKTAIEEAIQLRQAISEMDSNRNSVANITVSIGVA  
AAALYTAEDIDMLISAADKALYKAKRAGKNQVASQETLVTQTLKPRN\*

>SPSA8\_v1\_440005|ID:41145980| Pseudouridine synthase [Spirochaetes Bin 1 SA-8]  
MNDRKHRRTPNHPHENPPAPSHQGNTPRPRRQNSRFFEILYEDSDLIVVEKPEGLPVIAP  
EGSRGKSLYDLVTRHIQKRNPHGAAALVHRLDRDTSGVMMFAKNPQTKKILMDNWNALIK  
KRTYTALIEGQLPAEEGILDSWLMENRAGQVYEVPAETHGALRAITRWKVLKNLPKFSLV  
ELDLETGRKHQIRALSVAVGHPVAGDSRYGASSNPFGRCLHASALEFEHPRTHRVMRFE  
NQLPDYKF\*

>SPSA8\_v1\_440006|ID:41145981| protein of unknown function [Spirochaetes Bin 1 SA-8]  
LSFGGGVGEYSLDAMVQVGFHADGSEFSDASGHSWFEYILEFDIRERSG\*

>SPSA8\_v1\_440007|ID:41145982| Cupin 2, conserved barrel [Spirochaetes Bin 1 SA-8]  
MVLERKDMDVEARPQMRGGKGVNVTNLGAKPLQHLRVLAEILIPAGASIGEHEHLHET  
EYYLITKSGTVNDDGTLKVKPGDVVITGGAKHSIEADSGEELSLIAVIVTDQ\*

>SPSA8\_v1\_440008|ID:41145983| putative enzyme [Spirochaetes Bin 1 SA-8]  
MDFNASLFSDLKDKDFSAQGLMVLEGRITIEKALEKGIKLIGLASIPERAEEWRTKIGSE  
IPLVEMQQAELSGIVGFPFHRGSLALAIRPEITEFSAISSCQAASAQRPFVCLWDIADP  
SNVGAIIRSAALNASGIILGPGTADPLYRKAIRASMGNVFSLPLYSLQEKTLLEDLGSAG  
VYRIAGALSAKAVPLAEACQLSRGRFPAILLVGNEGYGLPEKVRSAACDLEVFIPMIRGVD  
SLNVAAASAILMYELFV\*

>SPSA8\_v1\_440009|ID:41145984| conserved protein of unknown function [Spirochaetes Bin 1 SA-8]  
MKTKEPEDRIA YEKMLPGVLT AQGFLGNDIRPLAEIIMEDEQEFIRLGLDFEEVADRLDAL  
KQAGEKGLGEPITVGELLVQTGDARGMLPCPWGDGLYHKNAISIQPADKPEACVEGEDM  
LXFSDLSIHLLRVHHCQGLGSPFRLLDPVFLKHLIY\*

>SPSA8\_v1\_440010|ID:41145985| Ferredoxin--NAD(+) reductase [Spirochaetes Bin 1 SA-8]  
MTQILIGPLAVAIISTVLAFLIAIIDKVLNNYGVKISINGGKKVLEVKGGSPLLGTLAA  
EGIFVPSACGGRGSCGACKCKVTTDVGPHLPTELPYMSPAIEQKNIRLSCQIKVRKDLEI  
ELPEEFFSVKKFQTKVESIKNLTYDIKEVLLALQDQGQTFEVEAGQYVQLVPPYGEITES  
VQRAYSMSSRPLDKTHIELLIRLVPGGIATTWVHKFLKEGDRVEVVGPFGEFHIHDTPAT  
MVCVAGGSGMAPFKSMLYHMYETGAFQEKEIWFYFFGARTTKDMFYLDELAELAAARWPRFH  
FVPALSEPKEENWKGDVGLITDVLDRYVQSTIDKSKGLEGYLCGSPGMINACINVMKKN  
GMTEDKIYFDKFA\*

>SPSA8\_v1\_440011|ID:41145986|nqrE| Na(+)-translocating NADH-quinone reductase subunit E [Spirochaetes Bin 1 SA-8]  
MINAPDVGLLSLFLASILTSNVLLANFLGTCSFISISKDFKSSMGLGVAVTMVICISAI  
CWAVLYFIIKPLGIEYLSFIIFIVIAAVVQMLEMIIDRFSPGLYLALGIFLPLITVNCA  
VLGVILFMQIRNYNFMQAVIFGFGSGAGWWLAIMLLASIRKKLDNNNAVPAGLKGTGITL  
ITIGFMAMAFIGFSGMIAVQ\*

>SPSA8\_v1\_440012|ID:41145987|nqrD| Na(+)-translocating NADH-quinone reductase subunit D [Spirochaetes Bin 1 SA-8]  
MSPAkkVMKDGLWSNNPIFVQVLGICSTLAVTNNLRNTLIMVLGVTFATSMGSMTLsFLK  
DLIPRKVRMIVQVLVLSFYVIIIIDILLRAYQPAISKQLGPYVGLIITNCILMGRAEAFAA  
ANKPGLSFIDGIANGLGYGWVLISAFIREFLGFGSLFGIKLVGDQFTPWTIMVMAPSAF  
FLVAIALWIANNYKAAAEAKKKAKPAVQPASQSK\*

>SPSA8\_v1\_440013|ID:41145988| FMN-binding domain protein [Spirochaetes Bin 1 SA-8]  
MKFKKESIGYVVIFTFIVCVAFVILLSIANQLTLDRVKANKSYESHFAVLSAFGLADGNT  
PKDQVESIYAASIKELAAADPGVSAYSADIDGTNYLAVKLTNPGLWGPITGILAADIKAE  
RIRGFAILDQQETPGLGGRISEPWFAIQFKNEKVAGDGTIAVIQGSgKGDPDSENGQVDA  
ITGASRTSDFVKTLVNKSLDQIRKIGGSL\*

>SPSA8\_v1\_440014|ID:41145989| NQR2 and RnfD family protein [Spirochaetes Bin 1 SA-8]  
VVKFLKQPMRkVLYSLIPLYLYALWMyGYRVILSAAVVFLGvGTEWLFERKKSGKVSE  
AVLVTALFALAFPPKTPLWILGVGIIFAVSMAGVYGGFGRNIFNPAIAGRAFVYISFA  
VVLsASYTSFGNFGIGAADVVASATPLGVMRQGGQVPILNLLGQRSGAMGEGMVLLVIA  
AAIYLIATKTASWRIILSSVLGAVLNAILYSGVKRALPMESLLAGSFLYVSVFMATDP  
VSAPKKQLSHYFYGALIGATIIIRTFSAFPEGTSFALLFGNTFANLIDIAVDSAKKPGP  
AKQGGTK\*

>SPSA8\_v1\_440015|ID:41145990| B3/4 domain protein [Spirochaetes Bin 1 SA-8]  
MLTQFSFDNDRSLANIIAAVVEAQQGVSWEpYSFEQVFQDELQRCLASGESLVSPSRKKA  
RDMLRHGSYKpAGRAKPSSEYLLQAMLEGDFPRVNYFVDAANLVSLAAGYPISIIDLKA  
GSDLLRRGKTGDafIFNAGGQEINVTDLLCIYRKAGADWLPTANPVRDSMATKIFEGAR  
NLLAVIYAPEGSEGSDLPAAEKLAGFLKARARQVAEILKLE\*

>SPSA8\_v1\_440016|ID:41145991| exported protein of unknown function [Spirochaetes Bin 1 SA-8]  
MKKRCIALIVAVLIAAPLFAIDFGVNYTKEQAGFQRDFFGATIRSVGEGFLGFDLMVITP  
SLTSYMDPVENAKFLIAHYQDIEYAQILPFLLVNLRMKPLTLYGGLAPMIDLTYLPDDL  
NKQFDIQLYSPYIYQAKVGLQLNLLILGAYAEAGTIVDLTFKSAFENFHLTFGAVLNf\*

>SPSA8\_v1\_440017|ID:41145992| Cna protein B-type domain [Spirochaetes Bin 1 SA-8]  
MKKTHILLAVLVLTGTLSSCDQLMQWQGNaiIKGLAKYFDKGANQNGGIRITLLSATII  
IKPNQVPLDVAPLVKVTSSNGRFSFNGIAPGSYIVVAEDPSGEYQPANLYVTVAANGEVT  
TEDLVLTkAIQHVVIFRDSSGEWNETTAIGDILADEVGMTEGSGANQFEYKSSAEMAGYT  
PNLGDLLIIGGDQTTsFYNTYTVNKAVFDNFVDGGGTMFwIACDGGWQAGDFTSTLPGGV  
TWRDRYENYNDIVYFEHPITRNfPEQLYGNyASHGGFDNLDLPLTNLMVYVKEASGLLP  
TYIEYRTGSGKVLASTAPLEYyVANGPTDKPDGFSTSYRDLFKLMLARSIKYIMGLPVSE  
DVPPSAEAMGLKALPAQRMSH\*

>SPSA8\_v1\_440018|ID:41145993| Threonylcarbamoyl-AMP synthase (fragment) [Spirochaetes Bin 1 SA-8]  
LSFTDNPARIPPMMLDISEENLKIAGRALAEGKLVAIPTETVYGLGADAFNAAAVARVF  
EAKARPSFDPLIVHIARIEDLEKIASSIPPKAKLLADHLWPGPLTMILPKRSEVPDIVTS  
GLPTAAVRFPQHPVARKIIEFSGTaIAAPSANPFgyISPTRAEHVARLLGEKIDYLVDDG  
ACEVGVESTVIDMXX

>SPSA8\_v1\_450001|ID:41145994| Beta-glucosidase homolog [Spirochaetes Bin 1 SA-8]  
MAQAAAYLSGNIGKSDIKALGRQCGEELRSLGINWNLAPVADINSNPSNPIIGVRSYGEN  
PEQVADLASAFAAGLKEGGVIPTAKHFPGHGDTSVDSHLDIPLVPHDIERLEAIEFVPR  
RLIHEDIPAVMTAHIRLPSVEPDMVPATLSSRVLQGLLRKLGFEIICSDCMEMKAIAD  
HFPNAFVMAVKAGVDILFISHSAEKQLFAARSIYEAVKKGEIAESQIDASVERILAIKGG  
IYQTNSTFDAYKKTIASPHAGNLAQKISRASLSVLVHGDSTSTPPSGSVLIDVVPGNITNAE  
DSQHTVSIHAELTRQNVPIFSCAVPLNPEGKDIASALSCEAGSLSSPASAIQKAEAKPAL  
ILALHAPMLHSGQMKLQASVHFAQARSCPLLVLTRNPYDAPAIVKEAALANLPAPFIV  
CSYEYSEVSVASIVAFLTGRLEAHGICPVTVDG\*

>SPSA8\_v1\_450002|ID:41145995| ABC-type dipeptide transport system, periplasmic component [Spirochaetes Bin 1 SA-8]

MKKKLIVAMVLLSLFVATTVFAQAPARGGILKMTPSKQGVLQNNFNPFSPAVLESALGCI  
YETLIYFNNANGTANPWIAESWSWSNDLKDITFVIRQGIKFNDDGTPLTAEDVVFSAMLGK  
TNKALDISGLWSEGLQDVTASGNQVTFKFATVNVTTLEKFGNLYIVPKAIWSKVQDPLSW  
TGNTNPVGSPPFVLDPASFNEQSYKLVRNPNYWQKGADGKPLPYIDGIQYVSTTNEQIAF  
KLMNGEYDWAAYSLPNVDAVVAADPVNKNKYWFPEGNLVFLYINNLRTPFDNVNVKAFAM  
AISQKDITRKMSPSPVPADMSAVKKSFSIIAQEGKAKYNITYDKAKARKLLESEGYKLN  
KGIYEKDGKALSFKLYVPTDWDWIGAAETIASMLKDIGVEAITQSAWPVPFQTSLETG  
DYDMAVSFITTGTPYQFNRLYSANYAGLGEKAKVFSNMRYKNADIDKNLEAYXSEPN  
PEKQKVYXSAVVTQFMKDTPCVPLFFNPTWXEYTTKNFVXWPSADNPYA WPSVIGMQKVP  
ILLSIHKK\*

>SPSA8\_v1\_450003|ID:41145996| Binding-protein-dependent transport systems inner membrane component [Spirochaetes Bin 1 SA-8]

MKYLARKFGMLIFTLFVMSINFFLPRMLPGDPAKALMDRMIEGVEAEKLESVRAAFGLDT  
KDSLVPVQYGKYLNTVKGDLGISLSRFPMPVSSVLASALPWTIGLMGLCTIIGFSIGTLL  
GIWAAWRRQTKLASFTVGFFTFIRSFYFWLGLFLIYIFSFKLKVFPPLGGAFSIDQTRGS  
AGWWLSVLQHGILPAFTITLSSIGAWLLMMRNMINVLAEEFITLAIKGLPMQRIRLMY  
AARNAILPSVTGFAMSFQFVGGGLITEMVFA YPGMGYMLYQAVNAKDYPLMQAIFLIIA  
ASVLIANFLADIAIMLLDPRVRDGAK\*

>SPSA8\_v1\_450004|ID:41145997| ABC-type dipeptide/oligopeptide/nickel transport system, permease component [Spirochaetes Bin 1 SA-8]

MIRDFFKTLVKNKKSLSGLILLGFFVLVALFAPLLAPYPPKTDKIERTILLEENKSDPEV  
LTEETEGKNREKSVYTVTITQKYEKTTDYFPTRAKPSKDHLGTNHAGNDLLSQIIMGTR  
ISLVGLATGLFVTFISLSLALLSGYLGGLVDDVLSFITNVFLVIPGLPLMIVIGTYVPM  
HGVLPIILSLTSWPYPTRLRSQVLT LKNRDFVRASKMIGERTSFVIFREILPNMISI  
VMSEFFT VLSLAILGEATLEFIGVGNITV VSWG TILYWAQANGAILMGAWWWFLPPGLLI  
ALTGTAFVLINFGIDEISNPRLRK\*

>SPSA8\_v1\_450005|ID:41145998| oppD oligopeptide transporter subunit ; ATP-binding component of ABC superfamily [Spirochaetes Bin 1 SA-8]

MDADAILELRSLKAGYATNAGFVRAVDDVSLTLKRGEFLGIAGESGCGKSTLAYSIMRL  
RDNARIESGSILFDGTDITSLNEKAMNEYRWTKMSMVFSAMNANLPVLSIEEQLIDAVL  
AHKQVSRAEAKKTAIEMLELDINPERISSYPHQLSGGMRQRVMIAMALLKPSLLIMDE  
PTTALDVVVQRSILQKIEELRYIFGFSVIFITHDLSLLVEISDSLAIMYAGKICEYGPSR  
EYASPNHPYTKGLMNAFPTLTGPM SRMGGIEGQAPSL LAPPPGCRFAPRCASAVEACTT  
AVPMLRRTTSPGR LCACRLCGGNHE\*

>SPSA8\_v1\_450006|ID:41145999| appF Oligopeptide transport ATP-binding protein AppF [Spirochaetes Bin 1 SA-8]

MNNVILELKGVS KHFTLSGIRNIGKV VHAMDDVSFSLNKGESLALVGESGSGKTTTASVI  
AGMYEKTSGEYILDEQPVLPFKTRESLRYK KKVQMIFQDPFASLNPTHTIR SILERPFL  
IHKLAGSAQELEAMLSDSLEMVGLSPAQEYLHRFPHELSSGGQRQRVNIARTFAVSPEVIL  
ADEPTSM L DV SIRIGIMNMLDLKEKKNVSFLYITHDLAGARYMSTKIAVMYAGMIMEIG  
PTEEVIANAVHPYVQLLKASAPAPQEGVRKSAIPAKGEIPSLVNPPLGCRFHTRCPYAKK  
ICSEAVPAMRDIGNHGLVRCVLV\*

>SPSA8\_v1\_450007|ID:41146000| protein of unknown function [Spirochaetes Bin 1 SA-8]

MCIVSIMMVQCSHEEQKMAHTCALSDAEAYLLKTLGLKIRTAPLLGVSLLN\*

>SPSA8\_v1\_450008|ID:41146001| protein of unknown function [Spirochaetes Bin 1 SA-8]  
 MYAYDKEKTLNFINPEKYGPFGAHAVFAFDYFSDDIKTKLFTYIKRTAEPRGGKIDFDIA  
 GTLSGNWIVEGSDVIKSADPWNWYLAFFVYDMYYPESRRISIGVELGKTINRLNGLLTQPV  
 EGPEYTDVTPASSSPAVYKLADAVEGMNSFPTQADIKYTLLAQVVEEDKIKVQLFEGNVE  
 NPSFTDSALYYTR\*

>SPSA8\_v1\_450009|ID:41146002| Oxidoreductase domain-containing protein [Spirochaetes Bin 1 SA-8]  
 MNIGIMSAAHVHADAYVGCRLSIPGVHIAGIADHDHERGAFAFARHYGLDYFASYEALLGQ  
 KLDGVIITSENAFHRELALKAAERSVHILCEKPLATKVKDAEDIVRAAREAGVLLMTAFP  
 MRFSVPVRTVREELLAGRLGTPLCFNASNQGQLPPGDRAWFTDPVLAGGGAIADHVVHLA  
 DIMRWYLGTEVVEVYAAANRIFHADEVQVETGGMVSIRFENGVFATIDCSWSRPVSWPSW  
 GGLSFDLITDKGAVRVDAFKQNLTYAPKASKVSAGASAVPAGGTGTAPVAAADHDWTT  
 AHSBGDGLGPRWLSWGSANQAMIEEFIAAIREGSAPAVTGADGLAAVRIIAAAYKSIQ  
 EGKAVRV\*

>SPSA8\_v1\_450010|ID:41146003| putative dehydrogenase [Spirochaetes Bin 1 SA-8]  
 MKIGIIGTGMGSTHASAWKKTGADLVGFLADPPSEARQIAQHYEARAFSSLEELIERVD  
 VVDICSPHLHSEMAIAAARAGRHIVCEKPLARTVEQGEAMLEACRMAGVRLFAAHVVRY  
 FPEYALAAGRQVQAGDIGKVGTAQYRRLSYRPPKPVGNWFLDEEKSGGILLDLMIHDFDIA  
 RWIAGDVSVHARNVTSYNKDSPADYGMVILVHASGALSHVAGAWAYPPPVFRTGFEICG  
 DGGIIQHSDSESPIEALIRQETSEAPDVGLPASPLAESPYDLEIADFYRCLTEGGEPSV  
 SAKDGLAALKIACAAIESAKTGQAVELEPRGERGEKVPKAGPLADEHIASKGRR\*

>SPSA8\_v1\_450011|ID:41146004| Carbohydrate ABC transporter membrane protein 2, CUT1 family [Spirochaetes Bin 1 SA-8]  
 MKQLASKASKDAMRNRFRGFLKHVILILFSMIALFPILLILMNSFKLKKYIFAAPFALPN  
 AKTFLIGYNTVFQRSNLIVNFGNSIIVTVVSLFFILLFGSMAAFALSGYKFKGNAFLGF  
 YLSIGIMPIRLGTVSILKLMASLGLVNSLIGLILYIAQGLPLTIFILTSFMSQIPDEL  
 KDAGRIDGASEYRIYSLILPLVRPALGAIGFTMPIWNDLWFPLIVAPSAKTATITLGV  
 QQFLGQYVSDWNAVLSALVLAMVPVLLLYLLFSRQMIRSVTAGAIKT\*

>SPSA8\_v1\_450012|ID:41146005| Sugar ABC transporter, permease protein [Spirochaetes Bin 1 SA-8]  
 VLDIRGSRKFPFFLVVFLGPAACIYTLFMIYPLVESLILSFFSVQPDNSSFAGFANFVK  
 LFTDSDTAPRFWGALKNNVLFIIHMVVQNPIGLLLASLLVTKGKARGFYRTVLFMPTVL  
 SVVIIGFIWQLLNPLWGVAESMMRAVGLGKLFQPWGLAEYALPAVALISVWQFIGIPM  
 ILFYTALIGIPDELIEAAVVDGCTEAQAFWHIKFPLILPTIGIVSILTFVGNFNADFLLY  
 TMKGAFAGPAYSTDIMGTLFYRTFFGQQQLQGNPTMGATVATMMFLIILTGVLIYTFLFQ  
 RRIKTYQL\*

>SPSA8\_v1\_450013|ID:41146006| Extracellular solute-binding protein [Spirochaetes Bin 1 SA-8]  
 MKRLLLAVMITLVALSAFAQQKVTLTIESWRNDDIQWQDQIIPAFEKKYPSIHVVFAPT  
 PPAEYNGVLNSKLEGGTAGDLITARPFDAALYNKGYLADLTNLPGMNNSVSAKSAWI  
 TDDGKHVFAVPMASVIHGFFYNKDIFKKLNLKVPQTKAEFMQVLEAIKKDGRYIPLAMGT  
 ADMWEAATMGFQNIQPNWKGEEGRQALLAGKQKYTDEPYIKTWKELAAWAPYLPKGYQS  
 VKYPDAQQLFTLGKAAIYPTGSWEIWLFEKDAAFELGIFPPPVEKKGDTVYISDHTDIAL  
 GMNAKTKYPEEAKKFLWMTTPEFASLYSNALPGFFTLNHNKITLKDPLANEFLSWRTTC  
 KSTIRNSYQILSRGDQYGAPNLENELWQVSASVINGTMTPEEAGKRVQAGLDKWKPKK\*

>SPSA8\_v1\_450014|ID:41146007| protein of unknown function [Spirochaetes Bin 1 SA-8]  
 LLEVEKMGKKTLLMFLILLVGAGCSLVTEVPSGSIKVGIDLSKPRSLGYSINKITLLEK  
 HEKSGETIEREFSIVNTSANFQIRGLRVGQWQIKVKLYEDTQEVGAGMTTVSIEKDAIAS  
 ASITITLYTGSLNLDVDWENQGDPEGFTLVNPSFTFTMGRTKWSGQYGIAYDNELPHLV  
 ELTKPYIIAKYEVSYAKWKEVYDWAIVHGYDFSNAAGWKGGSFLETQSPLTDDTHPVTHI  
 NWDYDAVKXX

>SPSA8\_v1\_460001|ID:41146008| protein of unknown function [Spirochaetes Bin 1 SA-8]  
 LKYKTGAGTNTDYLDLDAQTDLMRTEADYYRALFDEEIRASLRKATGETAY\*

>SPSA8\_v1\_460002|ID:41146009| Periplasmic component of efflux system [Spirochaetes Bin 1 SA-8]  
 MKKKRLIIVGIIIVLIIAVLLINHFRTKKDNSVLKLSGNIEVTETNVGFKLPGRVVELAV  
 DEGQQVKDQRIARLDNAELTSVVMQYKASLQEAMTRLAELRAGSRAQEIERAQANVNAL  
 AADLDKAKKDYERADTLYKNGAISASQFEAAQNAYNTRAAQHKSQETLSLIKEGPRKED

IQAAEYRVQQAAMLNTSEERLKDTTLFSPISGVVLRKNVELGEIVSSGIPVFTIGDLEG  
PWVKVYVKEDRLGQVKLGQKADVSVDVDFKNTYEGTVTFISSEAEFTPKNVQTEEERVKL  
VFGVKIKVKNENGELKPGMPADVRLTK\*

>SPSA8\_v1\_460003|ID:41146010|ybhF| fragment of putative transporter fused subunits of ABC superfamily: ATP-binding components (part 1) [Spirochaetes Bin 1 SA-8]

MNSEIAIKTQNLTKAFSGNVAVDNLNLEVKKGELFGLVGPDPGAGKTTIMRLLAAIMDPTS  
GNAWVAGYSVLTGDESIKDEIGYMSQKFGLYEDLTVFENITFYADIYGVVSQKERPRRIER  
LLGFSNLAFFKDRLAGQLSGGMKQKLGALCALIHTPKVLLLDEPTNGVDPVSRDFWDL  
YDLLKEDITVAVSTAYLDEAERCTKIGLIHKGAILKVDEPSAIRELSLEMSMIEVSSPHAR  
VAREIISTVDGVNSISTYGERLHIGIKERPIADKVLAAALTVNNVEVEGYREIVPSLEDVF  
MELVKEEEGKRP\*

>SPSA8\_v1\_460004|ID:41146011|ybhF| fragment of putative transporter fused subunits of ABC superfamily: ATP-binding components (part 2) [Spirochaetes Bin 1 SA-8]

MNENNTAVQVTDLRRTFGDFVAVDNISLSVTKGEIFGFLGPNAGKSTTIRILCGLLMPT  
GGTGTVGGFDINKESELIKQVIGYMSQKFSLYDSLTVENIKFFSGVYNVVKVKKKERME  
WVLEMAGLMEKRNTLNRNLATGFKQRLALGCAILHEPRIVFLDEPTSGVDPISRRKFWDL  
IGEMSQAGTTIFVTTHYMDEADYCDRLALMYRGKIIAEGTPNELRKKYMSRDVLEVNVDK  
VVEAFNVLSLHRIEAAIFGSTLHVMVDDRETSRAHISSVLGDSGITVKGIEKIPPSLEDV  
FVTLIEVS\*

>SPSA8\_v1\_460005|ID:41146012|ybhS| ABC transporter, membrane protein [Spirochaetes Bin 1 SA-8]

MKLLRVKAIMKKEFIQIWRDPLSLAMAFIMPVILLFIYGYAITFDIDKIPTVVFDMDKSS  
LSREFVNQFHESGYFRVNSYVDNYKAIDPYLDAGRARVAVVIPEDFSKNVHKGCNVKIEV  
LIDGGDSNTATIAQGYAIAIAEGFSQRFRGSRVTPFIDSRVWYNNELKSRNFIIPGLI  
AIIMAVIALLIALTIAREWDRGTMEQLISTPVKTPELIIGKLIPYFLIGFADTILTILM  
STLLFNVPLRGSVILLGLSGIFLFGGLSFGMLMSIVGKTQLAASQAALLTSFLPAFLLS  
GFIFSISNMPKPLQIVTYFIPARYFVTILKGIFLKGSTLKILWLEALLTLFAVLVFIAA  
NRKFRKRIE\*

>SPSA8\_v1\_460006|ID:41146013|ybhR| ABC transporter, membrane protein [Spirochaetes Bin 1 SA-8]

VFERIKNLVIKEFIYFREKRTIFFLLATPLIQIILFGYVATMDVNNISTALYDLDRSSE  
SRELVRRELESSGYFTITRMPASPEEIRDLIDKGDVLCIAIQINRGGFKDIQRGTPTEVQVI  
VDGTDSNTALIAMSYINTIIGKYSMDMTGGVNNANIWRLDLNRVWYNPDLKSRNYMVPV  
VIALIVMLTCLLLTSMSVVREREVGTMEQLMVTPIRPLELILGKTIPAAIIGYFDMALVT  
FFGVFWFSVPIHGAVMLLVLTGAYLLSVLGFGLLISTISKTQQQAMTATFFFFQPVILL  
SGFATPIETMPEVFQYITYLSPLRYFLVIVRGIFLKGVGIDILWPQILALLALGTTLTA  
SVFRFKKRLA\*

>SPSA8\_v1\_460007|ID:41146014| putative heat shock protein related to DnaJ [Spirochaetes Bin 1 SA-8]

MLVNQLDEVALKNVRIACATLFSEELAHDDSFIEENLSMDTVEKAYWQKAKRCYHHLTPLS  
SRSEAQEAALNDVRNSLETLASFLQSGKQAVDEAPRKGRRIAIGGAKGGIGKSIVVANLSV  
LLASKGFKVTAVDLDLGGANLHLCLGNKVLLQHNINDFLRKRVDLQDIAIKSEYGPYLI  
GGDSAQLGAANIDFGRKLLKAVENLNSDFIIDLGGDTSYNIIDFFLKADYGIVLTTR  
DSASYIGAYHFLKAAMYRRFRNRLFGPESKFRMYKNHQLENLIHDILNPASGEWPKSIHDL  
LERVRQEOPDHLPFMNEVVENFRSYLIVNKVNPRLGDFVNPITRIQQVTKTWLAKEV  
TYLGSISFQPEVENSMDLVPVVVKYPKGKMAEELSAIVTRLFDQEM\*

>SPSA8\_v1\_460008|ID:41146015| protein of unknown function [Spirochaetes Bin 1 SA-8]

MAVSTLRARALTKIRIEKIKNFTKYLNGIEYVYLSAS\*

>SPSA8\_v1\_460009|ID:41146016|pcm| Protein-L-isoaspartate O-methyltransferase 3 [Spirochaetes Bin 1 SA-8]

VKFLIFSILIFVSALALSVDTAMSADAFEKRRQEMVEKDIKTRGIKDERVLSAMLKVQRH  
LFVDEKQRSKAYNDHPLPIGEGQTISQPFVVALMTEAVGLKGTERVLEIGTGSYQAAIL  
SEIVKEVFSIEIKQGLYEMAKERLQKLGYNITVKHGDGYYGWEANAPFDVIMVTASANH  
IPPPLLAQLKEGGRLIPLGSTVIFYQNLTTLVTKEKGKHTIKELGAVAFVPMTGQAQKK\*

>SPSA8\_v1\_460010|ID:41146017| conserved membrane protein of unknown function [Spirochaetes Bin 1 SA-8]

MRPPYLLAFFCSLITLSFEILLIRIFSVRLSYHYASLIISLSMAGLVIGGVIVFFQHATS  
RPPGFSSHQRLQRFAAALAVSCPAVFMLLSLIPLDHVRMLWENVQVVYLVVFIPLCTIPF  
FLYGVFISSALSAWRDTANRVYATDLVGGATGILLVVMLMDALKMEYILVIVTAVTGWII

LSALRKTSPKIVMTAILFGLCLCIVLDASSLKMSPYKGLSQALKDDGAKHVATIYSSHSR  
LDLFENPQMKFAPGLSLTFTEPVKGLGMALDGEIAGVVMERKEQAIYKFLSYIPSALPY  
LIHTPDNVVIIGARNSIDLLPKYYGVVRASIAEHDASVVKVFSRHHGSIHPFPVYFGS  
GRTLLKLDNNLGLIFLSKTGFFPSGSFGLQEDYDLTVEAIGTYMQRLNNNGILFIQMFL  
VPPRSEVRLAKNIQTALEKIGIHELANHLLIYRSWDTINFLIKKDGLSETEFRNVRQFL  
ANRQFDVLYPDIAEQEQFIAGLDYKHLFYRILTDRASSEFSSSYAFEIRETTDDRPFPHY  
FLKTSKLIDIYKLSGRKWAYFLHEGMSLPFILVCTILFTICIFVIVLILTKKKLKFSLSK  
QKSPSLSCSLIYFALIGFAFMFIEVFFIHRLLPFGSPVKAFSVTLVTILVSAGMGSIGT  
GWFTGKKTMTISLAPLLIIANYFFFDLADESVLSAIFIPIGIVLGGFFFPVGLRFLVTN  
KTGQVPLAYTANGAASIIAPSLVSLVAVSYGCKVLLLLAAFLYILAIAIILPVIFRVLTA  
SKYS\*

>SPSA8\_v1\_460011|ID:41146018| UBA/THIF-type NAD/FAD binding protein [Spirochaetes Bin 1 SA-8]  
MKKLI EFLK TNAQGDLLPWEIHKRAMNEFGLTCRDVEEAALALEILPARYQRNRKTITTL  
LQRKLFQSKVAVIGCGGLGGYIIEELARLGVGTIK AIDPDVFEEHNLNRQILCKVSDLGK  
PKAKIAKARVKS VNP AVKIISVVKPFSRENGLGLLKGM DVVVDALDSVPTRIDLAECCAA  
LDIPLVHGTIGGWYGQIT TQLPGDSTVQMIYRNCKDSKGVERMLGNPSF TPAVIASLEVA  
EVCKLLTNQGTQLRKRMLFINMLDMEVDQIEIGETTSC\*

>SPSA8\_v1\_460012|ID:41146019| ThiamineS protein [Spirochaetes Bin 1 SA-8]  
MVFLIRNDVMRITIKLFATLRQGRFDIDTLDLPPGTKIIDVVQRLGIPEKEVTLIFVNGL  
HRNLISELHDGDTLAMFPPVGGG\*

>SPSA8\_v1\_460013|ID:41146020| conserved protein of unknown function [Spirochaetes Bin 1 SA-8]  
MPEFCNPFAGMRSRDKLSKDELVRAIRFMIAAEYEAVQLYQQTAESTDNRLAKEVLLDIA  
NEEKEHAGEFLRLLRELDPEEEEFYREGSKEVEEMIKKVKK\*

>SPSA8\_v1\_460014|ID:41146021|yjjR| putative ATPase [Spirochaetes Bin 1 SA-8]  
MNQILIGKGEKPVYLLAKYGNRHGLIAGATGTGKTISLMVLAEGFSRMGVPVFMADVKG  
VAGLALAGVTNEKIQRVNQIGIRDYINEANPVLFWDLYGKNGHPVRTTISEMGPSLLSR  
VLEINDTQAGTIEVAFKLADDEGLLLDLDDLKALLSFVAENRKEISTQYGLVSTQSIAA  
IQRALLTLERAGGEALFGPALELNDLMRTDLSGRGIISILSADQLILKPKLYSSFLLWL  
LSELFENLPEVGDLEKPKLVFFFDEAHLFDAPPALRQRVEQVVRIIRSKGVGVYFCSQ  
FPDDVPNDILGQLGNRIQHALRAYTPRDQKAVQTAETVANPTLDVAEVISQLAVGEAL  
VSTLQDKGVMPVERTIICPPRCRMGAVTPEERSIVRARSPIGGKYDSPVNRESAYEILS  
QRTKEQEPNQAPRQKGAEKPSEGGGGLGDLLWGSKHREGMVQALAKQAARTVGSQIGRQ  
IIRGVLG GILGGFGRK\*

>SPSA8\_v1\_460015|ID:41146022| putative Fructose-1-phosphate phosphatase YqaB [Spirochaetes Bin 1 SA-8]  
LISTLIFDLGLLADTEKLHCRA YQDALARHGFLLTEQDYAEHWILNGGSIREFIEARGL  
SIDPDMVRRAKAKRYGELVRS GVEPMPGALSLLSKVSGWKRLALATSSYEDDAHAVLQAL  
GIVSYFSCIATRSNVAKV KYPDLFLSV AHR LGETPNNCLVFEDSEKGVKAAGAAGMKCI  
AIPNIHTAKHDFGMATMVVSSLYDITKDLIDNM\*

>SPSA8\_v1\_460016|ID:41146023| protein of unknown function [Spirochaetes Bin 1 SA-8]  
MPLPLFALRETYMKDQHTPDMTADSVLHICLTGDFTLAKEFYVVLQAGFSIECQIGTSIE  
HLFYDQLKFNHHLVEKRIHTIFLNGKPVDDIATSMVYD GSTLALSSAMPGLVGATLRRKS  
PLASFRQSISTLQESRDTEKTSGYIKIKLFNILLEELGPFFLKMGIQIRTEFAAFTEQL  
SDSFYDRITQVLMNEKPVQLKSSAPWPSLLERYDCIHVKVLSE\*

>SPSA8\_v1\_470001|ID:41146024| conserved protein of unknown function [Spirochaetes Bin 1 SA-8]  
MKIFIVGTGRMGAWLTEL CWNHEVWVHDKDPLRMKYFIKVHRILDLNELDAVKPDLFIN  
CVALGNTVEAYREVLPHLPESCIIADIASVKNGLADYYKALNRPFVSSHMPFGPTLANIR  
DLHDESAVIISESCEAGKRFFREFYQRLGIKIFDYSFEEHDMVA YSLSTPFASSMVFAA  
CMKKQEAPGTNFKRHMAIAKGLLAEDDRLLTEIMFNQYTIRQLELINSQLAYLTHIIRQR  
DYEEMKKFLDTRLRSNIAD\*

>SPSA8\_v1\_470002|ID:41146025| Prephenate dehydratase [Spirochaetes Bin 1 SA-8]  
MTLDDL RQDIDKIDARILALLNERMEKAILTKKFKTGIEDSSREKAIFEKVERS SHCLVE  
PKFAVDIYSFIISENKR LQKMNFKTIGFQGEHGAYSEVAARLLYPSFATMPCHEFQDVFE  
NVEAGNDFDFGIVPVENTLGGLVGPVNSILIYTNLKIVA AIDMPVRHCLVCPPGTDHREL R  
TVWSHSQALAQCRNFLTRNHLDPV SFYDTAGAAKAI AETRPKGVA AIASRFAADLYGLDI



IKEDIQDAEHNRRTRFFVLSTGALQNKGSKCSAVFTAGDKAGSLFSILRVFADAANLTRI  
ESVPDKPGKYAIFIDFEGSLEEERVAAAIAAVSREAQDFRILGCYDETRVE\*

>SPSA8\_v1\_470003|ID:41146026|aroC| Chorismate synthase [Spirochaetes Bin 1 SA-8]  
MNRFGKNFGVELFGESHGKQVGVVIDGCPPGIPLAENDLEPDLARRRAGLDGTTPRREHD  
IPSILSGVYQGYTTGSPILIAFPNNDTRSVDYRQFTSIPRPGHADFCALKKYAGFADPRG  
SGHFSGRITVGLVVAGTIAKKILSFASFETRILEAGGSPDINRVVSQAQDSGDSVGALVQ  
VTVRRIPAGLGEPFFDACESVISHAVFAVPGIRGIEFGDGFAAAKMYGHEHNDPILDASG  
RTGKNGAGGINGGISNSNPIVFRAAVKPTSSIAMPQETFDSSQNLTRLEIEGRHDACIA  
LRSVAVVIESAAAIALADLYLTARAVSVLA\*

>SPSA8\_v1\_470004|ID:41146027| putative 3-dehydroquinone synthase [Spirochaetes Bin 1 SA-8]  
MQKKNAXLNEEHDNPGSEIEFCSLESKTRLSKQTTAIIADSRVYALYGKFFKDFPLIQV  
PAGEPAKTYSELLKLYTALAEMEADRSWTLALGGGSTSDLAGFAAHTWMRGIRLLVAPT  
TLLAMTDASLGGKNGIDLGYKNLVGSFHVPEKIYCDIDTLYSLDAGQFSSGMAEVIKHA  
ILQGESTFAFLES LAEKS RGPFPANFPASIDRADMLRMVRESQAVKLNIVARDPKEKNER  
RLLNLGHTFGHAIEKMTGALHGHSAVGLAAACEYAVRSALMDADTAERIKKLLTAFSLP  
TSLETLYGQGGKRVLSDAIRLDKKGGRMNFVVPKRIGLVEIHSVDIEILTNNFFEKEVS  
\*

>SPSA8\_v1\_470005|ID:41146028|aroF| 3-deoxy-7-phosphoheptulonate synthase [Spirochaetes Bin 1 SA-8]  
MKNLKLAAARPDLLRSIIDVNGVKVQGQEFVVIAGPCSVETEKQTVETAIAVKKAGAKMLR  
GGAFKPRTPSYAFQGLGLKGLKILDKARRETGLPIVTEVVDTRDVSWSVGEYADVLQIGAR  
NMQNFSLREVGVKSGKPIILLKRGMYSTLEEWLNCAEYILAEGNPNVILCERGIRTFETY  
RNTLDLSMVPAVHGESHLPIDPSHGTGILSMIEPMSLAALAAGADGLEIEVHIDPPSA  
LSDKDQQLTVPQFELLMKCLAQAREFFGQLHAGFTGETERPGAEQRTDAQSDLPTAFADA  
VD\*

>SPSA8\_v1\_470006|ID:41146029| conserved protein of unknown function [Spirochaetes Bin 1 SA-8]  
MMLLSAGKTFPKNALIQSNKDDNQLKSPGQPSCHLFFDKIMRYNPSMYFNELVEAYNKQR  
HDRNIYHDLMRFRVREVLVGSLYDSFVVEDSGVLTEQIYGEYFKLNLNTIPRVVCAYTE  
ETALDLFRSGKFDL VILMAGLDFDIPLAIAKAMKHIWPDIPILLMATNNSLEYLDFDSP  
EMASIDRVFVWNGYSKLVGMKIYIEDVRNVHADTQTGQVRVILLIEDSVRYYSRYLPVL  
YKVVVKQTQNLIEERITETYKLLSIRARPKILLASSYEEAEKLFETYQNNLLTVITDLR  
FPHKGCDEEAGDFDIKMAKGGKIHDLPILIQSSEPHIRSKAYEIGASFVDKNSSELELEL  
ASFLQMNLFDFRFCMPDGKEIGRARNMREFIAKMHELPAESLVYHAEHNHFSAWLMAR  
GEIQMSKVLKPYQIGDFPDIHAMRDFILKILDSVRKEKSKGIVPNFDESMLHEENYISRL  
VDGSVGGKGRGIMFIHSLLENLDFSRYIPEIEIKIPRTLFIGIDEFENFLESHNLWSEAF  
YKPYSNQLRQTFLSTPLSPTLIARLRAFLARTNRPLAVRSSGLFEDMLMVPFSGIYDTYI  
IPNSHPDLEVRNLNQCDAIKLIYASLFSVESRSYFEAAHYNLEEERMAVLIQELVGSRHG  
DYYPHVSIGIAQSYNYYPVAVYVKPEDGLCVSALGLGTYYVGGGVVHRFCPKYPKLDVLS  
DHALESTQRTFHALDMSISTPDL SAGEMASL KELDVSAANDDRHFAMI ASTWDAEDRRFV  
PGASGRGPKIIDLANILKYEALPFAQAISMILEIGSRSMGTPVEIEYAFNLSEPSGKPAL  
YILQLKPLIQADDKIELNLGALAPEDCFIVSDKTMGNRDL SVQDIVWVNPEKFDKAKTL  
EMTAEIEEIDRELKKAGRRYVLIGPGRWGTRDRWL GIPVSFAQISRAKVIVEVDLDFV  
DSSLGSHFFHNL TSMNIGYIKIPLRSKEAFIDWDWLKSQRRAFETDHCVWSTLKAPLDIL  
MDGKQKAGLLKAGNRERPSEENDEIEMENAEYN\*

>SPSA8\_v1\_470007|ID:41146030|pheS| Phenylalanine--tRNA ligase alpha subunit [Spirochaetes Bin 1 SA-8]  
MDAISIAKTLHPLEVKIILTYDTS AIFDARKVREELGYREGQENQAFSWLSGKGLITEVS  
RAQTGFFEITALGRDLAEKGLVEERILALLAEGAKTLSAITEKLGLEQKHIGSAFGLLS  
KEGIVALDDTKQACL VSEARLPQKIKILKSLEKALGKNGILEENELSAEKA VMSTVAK  
KRG AQDAPFRSADREQV FYKLSPEADEVRRALRALGVTGEEIGALTPEILIKGTWKNAAF  
RPYNIQITPARIIPGRKNPYVEFLESVKDKLVSLGFEEFDGNM VETEFWNSDALFMPQFH  
SARDIHDVYIEEPRKAKFIEEPYLSKVAAAHEHGGDTGSRGWNYSFDREFTKRLILRSQ  
GTVLSARKLPTAKVPGKYFGIARCFRYDKVDATHLSDFYQTEGIVLGEDVNLRTLLGFLE  
MFAVEVAGAKEVKYVPGYFPFTEPSVEVHIKHPVLGW FELGGSGIFRPEVTKSLGINVPV  
LAWGIGIDRMALMALGLNDLRELFSPDLENIRLRALLAN\*

>SPSA8\_v1\_470008|ID:41146031|pheT| Phenylalanine--tRNA ligase beta subunit [Spirochaetes Bin 1 SA-8]

MPKIEVNEKLFDFLLGERYTSEQLEEIFPTAKAELDGWDTDGVS AEDRTIKIELNDTNRP  
DLWSTAGLARQLKTHRLGKIAEYPPFFVPLGQQPSVRYTVEVHESVQKVRPYLAGFVARGV  
AITDAMLKDFIQTQEKL TNWNGFRKRKT V SIGLYRPAITWPVHYKGADPETTSFVPLQET  
RTMTLRQILAEHPK GKEYS FIL ANEPIHPLL TDN QGRVLS YPPIINSADLGAVLVGSDSL  
FIEVTGSDYPSVALTASIMACDLHDMGFTIEPVRVVPYDTPFGTSVVFPSYFQETVAVE  
LSEAEKLLGMSMSG EKALDALRHM GV SARIEGSKITVTPPCYRNDFLHPVDVIEDILIGI  
GMQHFSPQRPKDFTIGRLSPIETLSRKVKLSMVGMGFQEMIYNYL GSGKDYEKMGIDPA  
AVVKISNPMSENFEYVRNSPLPSLLGTESVSAKALYPHRTFEIGKVAIKDDEANYGVLTR  
QYLGFLNSHSSADYNESASQVAAILY YLGAA YEVRSLDPRFIPGRQAEIVSQGRKIGVF  
GELHPAVLEAFDINVPCAGGEIDL DYFI\*

>SPSA8\_v1\_470009|ID:41146032| conserved protein of unknown function [Spirochaetes Bin 1 SA-8]  
MEIYAFEPFGFSGFLVRVEVDIRRGIPATDLVGLAAGAVRESRERVRAAIRNSGFEPQD  
RILINLSPADIPKEGSSYDLPIALKILALSGKVPECGNRILVLGELNLDGSLPVRGILP  
ALTGAASQGIRRCLVPAGNFTEASQONLSEVYPINHL SLLPDILWMIQGNQSFNTMPKTE  
QQRFLAWNQGYSTKAGNEQESRVQVDYSDYLGNEPLL RALQIAAAGRHNALLFGPPGTG  
KTMAALRFP SLLPDLSEQQAMEALSIRS LYGYSIESLPEMKRPPLRAPHHSASLEGIIGG  
GRPVRPGEISLAHNGVLFLEDETTEFRHDVLQALREPIEHGAVILTRAGRTLSYPSDFQLI  
LAANPCPCGNLGNPQKTCVCSPLEIQRYWKKLGGPLMDRIDLRIPVAVPRIENIMNNTKA  
NQAALRSSVLQAIERQKARNIAGSRYLPNAKLPAGVISKCCRLETRAEMLFSQKIEALGI  
SVRSCHAILKIARTIADLDGKEVITEDCMQEALHFRQCGENEVYLP\*

>SPSA8\_v1\_470010|ID:41146033| protein of unknown function [Spirochaetes Bin 1 SA-8]  
MLSYKPSFRALDELIKLAPRLSSALSDFFKISQILIKLSASK\*

>SPSA8\_v1\_470012|ID:41146035| conserved protein of unknown function [Spirochaetes Bin 1 SA-8]  
VHRLGSM LARV KLGIDGGPHKRWSMWFNSMVXX

>SPSA8\_v1\_480001|ID:41146036| protein of unknown function [Spirochaetes Bin 1 SA-8]  
MTAAGIKKARWQGGQKAWGNGTYTLSIDKKPDNVKLPDWILKRLAVIAARQKDFAEYEHS  
ALVVLAAECKAYPETASRLPARFLTAIAHCKPGILDPIERAAVLLXX

>SPSA8\_v1\_480002|ID:41146037| conserved protein of unknown function [Spirochaetes Bin 1 SA-8]  
MSNATFISSDEAARLLGISKGYLYKL THERKLP CYKPRGGVLLFDTEELDRYIRAGRVPK  
RQELAAEAENYLNNGGRA\*

>SPSA8\_v1\_480003|ID:41146038| protein of unknown function [Spirochaetes Bin 1 SA-8]  
VRVKIKLCGAKERTEKLIERAQKKQANPCGTA AKALADLKLASTNLEVLPIRGDFGALV  
ENITRGDLRFLYKERYLSHAELAKLMGIPKAKIERWLKPGKSNDCILPYKRLDFYDVEAR  
APQRGERRKLI AHALASMGKNK\*

>SPSA8\_v1\_480004|ID:41146039| putative Site-specific recombinase, phage integrase family [Spirochaetes Bin 1 SA-8]

MGVKIRLRGKSKYFYLDICINGKRRFEALHFALPTDRQGQREAWALAEIIRKRELQIAA  
GRYRLVDPV GSKMTLIEYA EKIAAEYDKMHLPKSLRYLRPYAGDTALVDIDESFVDGYR  
AFLKSSSELGGKTAGHYLA AFKAVLARAERERLIERNPAKGVKSIRAPEYEKPYLTIEEI  
QRLYNTPAEGKLSEEVRRGFLLSCFTGLRLGDIKSLAWGDIRREPEPMIKKRQNTGDYV  
SIPLAPIAWELIDDKRLH KPDELVFPRLTATEGVNPHQPLIALRKRAGIEKPFGW HAGRH  
SFAMMTLEASGDIYAVSRL LGHSDIKITEVYL RMTDQRKKEIIASLPQVTKEGEVKIKLA  
GEKK\*

>SPSA8\_v1\_480005|ID:41146040| protein of unknown function [Spirochaetes Bin 1 SA-8]  
MTADTISVLIFLVGDKSFCLEIDVIDHVISACAISPVPDTKSSIEGIINVRGRIMPVNM  
GSKCFSKPIPLALSDKFIITIEKRYLALHVTDTLEILTLKKTAITQPDTILPGLSVISG  
IIQY AQELSLLYNPRKFFRNEFMEASEE EPQE ANHGTALEIH\*

>SPSA8\_v1\_480006|ID:41146041| putative Chemotaxis protein methyltransferase [Spirochaetes Bin 1 SA-8]  
MFSDQPAGQCNAENQEDLTSLIPRLTETIESALS I KKNLSLHHTYVRKAVQALCKTLKISL  
DEAISILTSPPPYGTQIVNLAEHITIGETYFFRHSEQFEFLEKIWLPSLVSERIRTGEK  
KIALWSAGCSTGEEPYSAILLNKVLPDFASWDITILATDINKNSLAFQAQAVYSEWSFR  
GVSPA VIEKYFVVQKSP LLERTGFLSGSRYK LKDSIRD MV SFRQFDLAASPWAMTPDFPA  
TFDIVFCRNVL MYFTRDTARQIIGRFHTMLREDGLLAVSPSEGWFARGAGFSLYPETSLS  
IFKKKPINGTRLPPIGDSTS QNKTVIPAASQMP PKTSIAKSVKKAPSAGKPGPV SSTA VT

SNIKEKAQALADTGKLEALALIEAAISXDTTHAXSHYLKALILMNLNRLPEAESSXKKA  
IFLDAEMVVAYLALASIAQVKXNHVDMIRHYRTAIKLLAKLDENQIVPYSDGMPAKALAT  
MISKVTEQHEHEEKS\*

>SPSA8\_v1\_480007|ID:41146042| protein of unknown function [Spirochaetes Bin 1 SA-8]  
MKDNPDTTTINAILRKRAEQLSRAEKIQEEKPSYTMLKFLISGLEYLEIPFIREVIFNS  
SGYTPIPGVPDYILGIKDIRGEIPIVDILRILGIGQNDAEHRDFCIVAASEDIVFGIMA  
DSIKNMDRIEKESVNADAASVSENVARFCYGLARDGSLLLNGNLLFTDTLIRGIER\*

>SPSA8\_v1\_480008|ID:41146043| putative Methyl-accepting chemotaxis sensory transducer [Spirochaetes Bin 1 SA-8]

MFSNMKIRIRMILGFGLVLLLILAMGIFAYYQLNTMAGLTKQLYARSLPVSVAVNKLKTS  
FTSIELLMSQAIGSRTKVNTQELNKKLSDEYFALELQLDVLREKYLGDQKEIAEIAASLE  
KLKLVFRSISEILSTNLSSTADRIFVEQAIIIEQTSKALDAIEVQVKSRASNFYSDET  
ARKSIITLLVIISASVILLSILIAFLLTESILRPLGDILTIHKARNGDLTVDTEAKLRK  
DEMGKLSAFIELISRFRIQIQLVAAISQLATSSSEISATASQLSASASETAASISETA  
ATVEEVKQTAQLSMDRSKDIYEVTQQSFTASKAGLDSLSSLMNKIHEIKNQIDRIAQSIL  
NLNEQSQAISDIISAVDDIAEQSNLLAVNASIEAAKAGEQGKGFVVAQEIKALADQSRQ  
STKQVKKILGDIQKATDVAIMASEMGTKAAENGVSSSLQVESXLKXIINGXEEXTHMTQQ  
ISAASQQQYSGIDQVTLAMENINXASKQNAEGSKNLEQSAHDIMQLSTRLKALIERKYI\*

>SPSA8\_v1\_480009|ID:41146044| conserved protein of unknown function [Spirochaetes Bin 1 SA-8]

MQDQEEFLKKLREAFNLEAAEHLAVIASSILALEGMTTPYPKDLVETAYRAAHSKLGASR  
AVDLRDIETICHAIEGVFSKISKGELAPDKSLELLLAANDSMEGILKGNTILTAAQIGA  
LARRIDEAAIPKPKIAVMKLSEIAAQTASPPAPPATPQEQRPLAAESKPETDHPHSVQKS  
SFANTLRIPA EKLELVLRDAENIISAKLALRQIMEYLSLSSSECEELLSSKEIETTCLRQ  
MVSETSKTLKKISKYAATEEYRVSTTIDKLIDDARTMLMLPCSLLEGFPRMVHDLAQSM  
GKKIEIAIEGKNIELEKHILEKLDPLTHLVRNSIDHGIEIPADRVKAGKPETALIKIKI  
ANLDSKHIEISVSDDGKGLDYDNIKSAAIAKGLITKEEAGNIDNERLGMLIFESGFSTSP  
IVTDLSGRGLGMSIVQQAVIDELDGFIKTESNPGEGTTFRLVVPFSRATFRATLIKTGDRK  
FALPTSSIIKTMRMKVDSIFLAGGEMMYFDSRPIGILRANRLLNLPQSTMESTNRLASI  
IITQSGESIAALMVDEILYEQELLLKPLGQLLNIALISGASIAGDGEIIPVLNVKELMR  
SVTARELENALIKNGALPAKERKTRKKKSVLVVEDSITSRMLLKTIIESEGYAVTVAVDG  
QDGYTALKSNPDCVITDIEMPRMNGFELTAKIRADKKLGDLPVILVTSLESREDKERV  
EVGASAYLQKSNFSQTLLDTIKRFI\*

>SPSA8\_v1\_480010|ID:41146045|cheB| Chemotaxis response regulator protein-glutamate methylesterase 4 [Spirochaetes Bin 1 SA-8]

MVRVLIVEDSYVSRELLKYIFIKDGGIEVIGMVGRGEDAIALLESMPDKPDVITMDIEM  
PGLDGYTTTRRIMETRPVPIVVISVGFQYPSAEKTFKAMQAGAVAAVGKPPAPTHPEFPA  
KTRELIGLVKAMAKVPVRRYANIPKQATLTDAAIKADKNYKLVVIGASTGGPPVLQ  
TILSRLPKPFPLPIVIVQHIASGFASSLAEWLNNTCGLKVVLAEADNTIATPGVAIAPHG  
SHTTISAGGVFNLQKPAENEILVPAVNPLFKSAAAALGSSCIGILLTGMGKDGAEGLLDL  
KNAGALTIQDKITSIVYGMPREAEKLGAAQLILPPEEIASVLEEIGKKAAMGDK\*

>SPSA8\_v1\_480011|ID:41146046| Response regulator receiver modulated diguanylate cyclase [Spirochaetes Bin 1 SA-8]

MDNNHILIVEDSLTQAMRLRYILEKEDLMVDVATNGREALDILRNIPINIVISDVMMPEM  
NGYELCKAMRADPKLSSIPVMLVTTLSDPTDVIRALEAGADNFLIKPYDESTLISRIKYI  
IANMEIRKTQGAIEGLEVFNGRKYFLNSSRIQMIDLLLSTYESAIQKNEELNTTNQRLE  
EALDNIITLQKNYLQLETNVDAIVVYDNKNLVRYANPSANAIFVSKKDSLLNKKVPFEL  
DTSSDSHEIEVTPDGQVLTLDGRTMTTDWDGEMMTLAVFRDMTEATRLRKELEQMSLED  
DLTGLYNRRGFNLLADRMVRQSKRFNMQLFVLFADLDGLKHINDTLGHPEGDLAISTVAS  
IMKKTFRETDILARMGGDEFAIMGMINELFVPDKLIKRFNQLVEEWNEKEKRQFKLSVSM  
GIETIDPSAAEPIETLLKRADEKMYANKLARKANRI\*

>SPSA8\_v1\_480012|ID:41146047| TldD/PmbA family protein [Spirochaetes Bin 1 SA-8]

MPESHHS AFLRAARPLLKEVVGILSRQFDYISVLCTDDNGISYAATPGETRTRAEPMWVQR  
GFVFRAQKQGKVAEYAVSNLEVADGAQQLAEGIAMALHQLLASPLIAYPAIPDQAMTRE  
FSLQPAEDPFLAEPEQVLSRLTSLRETLTDRKVIVMAQSRYEYVRVSRMFLSPHRDLIQT

FPWSQAYLFGISRRDQLSKMSYRSASGRKGLELLQDLETTVPDLTQELHDILDATPIEPG  
EYEVILDPDMAGTLAHEAFGHGVETDMFFKRAKATEYLGKRVGSELVTMYDGAADAEQT  
GSFLDDEGTLAHKTKIIDHGILLGGISDMLSSLALNIPQTGNRRREAFSHKAYARMTNT  
YFEPGTATLEEMVASVKHGWQLSRLNAGMEDPRNWGIQLLCMVGREIVDGAYTGRVASPI  
VCSGYVPDVLSAISMVSKDFTLSGSGACGKKGKEYVKVSSGGPYVKTRMRLG\*

>SPSA8\_v1\_480013|ID:41146048| conserved protein of unknown function [Spirochaetes Bin 1 SA-8]  
MMNMIDTILEGVKASKIAISDWRLVRKQGTRQEYFVVGSEAEQARLVQETRYSLTVYVDT  
IDGDKKFRGEATISIQPTLTADEVSAKIAQAAYAASKSRNQWFELPGPAEPKVAIPVSAF  
SVLPESQQLLEVRKALFQAVPESAASGPRINSELEFLTHEENFMLNSKGFSEAWKGY  
SEFVVDASPSGPVELFDDIEFSEPRERLAETIGARLAEVRDRAAAVPLPNLKDIPVIL  
RGKEAEQFFAWFFHNARTEMVFSKASSFSVGMNVQKNTDTSVQEPLTIWAEPFLPGLPA  
STSFSDSGFPLERTLVVENGVLKTLIGSVRHADWLSVPRKGAFPLFSVEPGTMPLSEMHA  
SPYLEPVMFSDFRLDPVTSFGAEIRLAYYYDGIKRVPVTGGSISGAVPMLRNTMRCSTE  
RGLATMSLCPIAVKLGQVVSITGMTE\*

>SPSA8\_v1\_480014|ID:41146049| protein of unknown function [Spirochaetes Bin 1 SA-8]  
VDETAIARAITKVFDLTPHGIETLQKNPIYRATAAYGHFGRDNFSWEKTDKVEALIRA  
IR\*

>SPSA8\_v1\_490001|ID:41146050| ABC transporter related protein [Spirochaetes Bin 1 SA-8]  
MSQYKIRNISKSFGEIHVLDDISQDFETASVTAVLGPSCGKTTLFNILSGIVKADSGNI  
GQFAAARFSYAFQDPRLLPWSVEDNMRFALSAIQDEALKKSRIHQFLADSGLEKFRTRK  
PAALSGGMKRRLSLARAFACPSDVLLLDSEFSSVDLKLKIELMDLFSRLWEEERKTTVFI  
THNIKEALYLADTIILLSSRPARILKIFFLDKPRNRRLFNATEYHDLEDEILEMILH\*

>SPSA8\_v1\_490002|ID:41146051| putative Multi-sensor hybrid histidine kinase [Spirochaetes Bin 1 SA-8]  
MAVIGIVEDEALIALDLKKCLDRAGYGIAGPYNAEAFLDGVRSGSMDLVLMDITIQQRI  
DGIDALRMAKEECGLSGIFITALADDATLSKIKAAASPLGILVKPFSERELLSTIDLALFR  
DGMERKLGKASEQRYRSLFSDSISRCILDEQGFLEANNAFNLLFQGAEKDSFPIFLKKP  
ESWAFIKERLQSQPLVRAIELEMMDKAGRPLAILGSFSKIDIVRQSEAGIACELVDMTES  
KRLREDLYQAQKMEAMGQLAGGIAHDFNNILTAVVGHAEMLKIDIHQDNPSYEDVLGIIG  
TVGRATQVTRQLLAFSRKQPFSPKISLSSLVMDSQKLLKRLAGESILFSLYISDEELPV  
YIDPVQLDQALINLVVNARDALEGKADGRISIVVGKRVLPERLMIRGKPLEAGAYAAIEV  
TDNGSGIPPEAADRIFDPFFTTKTSKGKTGLGLAIVASITTLAKGAVDVQSLYGGQTTFT  
LFFPLVRENENEGVDNSASDQDTSQNPSKTLPVFSGNLQILIVDDDENLLGFLARIVSKA  
SATVFSARNAGEALLILETKKIDLLVSDIFLPGMDGIKLYERVRQKQNIAAVFMTGRLDH  
QIEIPSGTVLLEKPFPTQELLQSIEHQCKIISISSSSRS\*

>SPSA8\_v1\_490003|ID:41146052| protein of unknown function [Spirochaetes Bin 1 SA-8]  
MTMKKRDTSTGILCLEVLALLTLFSLMFSSCAHGMAVITKPYTPTEMNIQNLAALAADK  
PLEFFQAFTAMAMEPEKAPLLEENQIAQTLSSQAAIKLAESYKQSKAEHDYKNALKYFYFYS  
LKAIAGMTDKRLNTAASLASALITSSSELFELLSAQVQSFRNAKQYAPAKSIMIRAFNLFQ  
EHETEFNQSAKKNIDLFQEWSEYANANSKNTLALLSKTDMVGDGFKDPASPFKLVSSV  
VTYVVDRGIKFQAGAGRPDRVLGSAFQIDPAGYYLTNYHVISSEVDPAYNGYSKLSIRPS  
DNPDERIPAKVIGWKNEMDLALLKSVVAAPFTLHLTEKAETEKGGQVFAIGSPIGENTI  
TSGIISAAGRLLTRGDVIQIDAPVNPNGSSGGLVDRSGKVLGIVFAGMKDYQGINFALP  
LSWINIYIPGLFSGGSLENPVLGVLLARNLDGSMDIVYTLQPQNRMFKAGDRLIMVNGEKP  
QDISSAQYKIAGIPAGSLVRVDIMRDGKNWQVLKIAESSKTIPLQDAARQDDVENFMAGC  
LGIKLEHVSGPRGPGSLYKVLRTWPGLAADEAGIREGDTIKFIKMSIDQRELLAGFVISV  
VSRSTGYLERSFQLTVSLESTSL\*

>SPSA8\_v1\_490004|ID:41146053|ftsH| protease, ATP-dependent zinc-metallo [Spirochaetes Bin 1 SA-8]  
MFDNKNEKEPGKPDLPQQLPPRANKAAFAVFLSLAVLFGALFLFNDKSSSKEIPYSAFIS  
YLELGEVDSVQIIDQKDIEGTLKGSSGVPVQFKTTIPYVDPELLSRMREKNIKISGTVRG  
ASPLQIFFELTPWFFGFFLIWIMMRQMVGNNKAFNFGKSKAKRYIESDKKITFADVAGQK  
EAKYELMEVVDYLKNPQKFAKMGAKIPKGVLLVGMPGTGKTIAKATAGEADVPPFFHMSG  
SDFVEMFVGVGASRVRDLFEQGRKNAPCILFIDELDAVGRTRGAGYGGGHDEREQTLNQM  
LVEMDGFDTKDGVIII AATNRPDVLDPALLRPRGRFDRQVVVAMPDIQEREAILKIHMKKI  
PVAQDQVDMRLAKATPGTSGADLANLVNEAALFAIRKNKNQVEMDDFEDARDKVLGMGVAR

TSLVIAEEERRATAYHEAGHALLHYFLPNADPFHKVTIVPRGRALGLTSLPEKDTYSRS  
RGWLFDRIVITYGGYAAEXLVFGETTTGTAQDLRQATDLARRMVCEWGMMAETMGPIAYGQ  
EDEPIFLGKEIARHKDYSEETARKIDEAIRSILDQGMNKAMEILKREREREKLEALAKELVL  
KETLEDAEIRQLLSLSAGDNSISSEA\*

>SPSA8\_v1\_490005|ID:41146054| protein of unknown function [Spirochaetes Bin 1 SA-8]  
MQSSGKISGQTAGQSSIEDSIAGLLTALVPEKEPVFVAFSGGLDSRVLLEVLVQLGKNPL  
RVIHVNHNIRPREELEKERELVIATCKKLVSLTIKIRPGLITGYARKKKCGVEAAARH  
FRYLAFKKTCKRFGFRYIATAHTADDQMETLIYRIFTGSNPESLGGIPKKREMGKEIFVV  
RPMLTLQRKDIELYARERQLEYSEDSTNSGTAYVRNRIRHFAIPALDKALPDWRSGLLRS  
AAQILKMOVKLQNRQVRSVLQTSHRDLEERRISISYGLFSSQPEAVRGGFVLRDCLQWVACK  
RNISVRACASAVDALEKGAEQIVCCGVVISRSKDTIIFHPEKQYQKMDGYCFLFHEPKII  
RYGEALVGFSEAVQEKFHDHESADDMYLYEGSFSFPLIIRSARKAGDVIKTEKGHTAIDDI  
LKSWHIQKGMRDIVPVIEDRDGIVAVLPALLGNTACSQKRFRPFSINGNPGKLHIILKGV  
SYIHV\*

>SPSA8\_v1\_490006|ID:41146055| rplY| 50S ribosomal protein L25 [Spirochaetes Bin 1 SA-8]  
MDHFILQAFNRELTTKGDIKARKEGRIPAVVYGGGISPKNIFIPASEYIKVQKNLTEST  
IITLDIEGTKIDAFVKEHQKSAVAKDLLHIDFLAVQAGKKIHAHVPLHLVGTPKSVLEGG  
ILEHLAHEIEIECDPSILPEKIDIDVAGLEINHPIHIRDIPVEKGMRLTNPETVVAIVK  
YAKHEEAAPAAAPEAVAAAAEGAPAAKAE\*

>SPSA8\_v1\_490007|ID:41146056| spoVG| putative septation protein SpoVG [Spirochaetes Bin 1 SA-8]  
MEITDIRIRKVPTEGKLLKAYVTVTFDECFVHNVKIIEGKNGVFIAMPSSRRTKTGEYKDI  
AHPICPDFRTRLQERILTAYSTDAGSDDSVPEFD\*

>SPSA8\_v1\_490008|ID:41146057| putative 4-diphosphocytidyl-2-C-methyl-D-erythritol kinase [Spirochaetes Bin 1 SA-8]

MFNEIRIIANAKINIGLAVGEPLSDGYHPIVSIFQAVSLYDELGIKLGSKAGDVTIAGAF  
DCLPENTTVYKAARLFLDELGENRSVGIEVKKRIPARAGMGGGSSDAAAFLAGLNRLHGN  
PLDEAQLARIGKKIGADVSYFILGKGTALVSGIGDIVEPIPTRTDFGIVIVLPDMGISTP  
WAYKRLDQMRHYSDIGIHPGHLLLEAKFTMRKMYEALTDWDFVNDFFHEIALADFPNLMET  
AEALKAQGAILVSLTGSFGSIFGIFENDVIADQAAASLKIPQTQGIMPLKPLETTLELG\*

>SPSA8\_v1\_490009|ID:41146058| protein of unknown function [Spirochaetes Bin 1 SA-8]  
MNSDLPARPLAIVTSSNSDSLVDALEMGVIVYSSLQETETEIYATMRRNQEIVNTNLVV  
LQRKSKELWRFCQL\*

>SPSA8\_v1\_490010|ID:41146059| protein of unknown function [Spirochaetes Bin 1 SA-8]  
MTPISSASTRSESEFELVTIANGLAGKSEFILRSPVHFDES YDDDFDEFEDDDDDLDLDD  
DFDDEDDFDDDFDDEDLDDDFDEDEDIDYDDDDIDYEDLDE\*

>SPSA8\_v1\_490011|ID:41146060| rsfS| Ribosomal silencing factor RsfS [Spirochaetes Bin 1 SA-8]  
VFDSKSLAFAAGALLAEHKAEDVILDLRGIAGWTDFVVIASCNSSTHMKGLARFIEDFM  
SAEKIQPLNKPVFKEDESWLLEDMDGVIVHIMSKEARSFYELEKLWFSAPSFKIEAGAKQ  
D\*

>SPSA8\_v1\_490012|ID:41146061| conserved protein of unknown function [Spirochaetes Bin 1 SA-8]  
MMKRIFDKSAILLWLIIVLFGGLLLGGFLYIRSESLAAQIRTDKPISILLVFEMDKKPI  
SQLLMFFPAKSKAALVDIPTNMAVILKSIKRMIDRIVYVYKQPAPKTYIQEVSAYLDTAIQ  
GYLIFNEKNLVKQVDLLGGIQIFIPQMIIQEGKDGIRLPGGYVTLGDGKALQYLMYRDPE  
EAEADFLARRQKFSMLMLLKRISQNAELLASKSNADSIVAAMNSNFSNPARKLLLSEMAKI  
DTDALLIQKITGMYRTVEGQQLFFPFYDGELVRDMLKQTMTAMVSSSENSISTKKS YTV  
LNGTQEKGGLASRTSDIFESFGYDVVAIGNAKTMDYEKTVIDRYGDKDALVAIGSVIKCS  
SYADSSNYKGSIKADFTIILGKDFNGRYCVR\*

>SPSA8\_v1\_490013|ID:41146062| putative Hydrolase, HD family [Spirochaetes Bin 1 SA-8]  
MDFQHLETNILQXLDLNVKESRKQHXLRADMAVRLCERFGEDQKSGYIAGIAHDMMKDM  
PLDLQWQYAQRFSLIPHSDFRFPVARSASMNFYDKIIHAPAASVYIFETYGVTSRIL  
EAIACHASAAETMSRLAKIYIADKLEPGRAHVSEELRSKMDSLTMDELFFLSLESVVS  
LSSQNAIAQTTLDLYNLSLTMKAGI\*

>SPSA8\_v1\_490014|ID:41146063| nadD| putative nicotinate-nucleotide adenyltransferase [Spirochaetes Bin 1 SA-8]  
MKTAILGGSFNPVHIGHLILAEVLSQCGYDQILFIPANIPPHKSIDDPGPHIRLEMLEA

AIKGYPFAVSDCEILRKSVSYTIDTIRQLKTDAGLKGQMDGKPGLIIGDDLLAGFFEWK  
EPHSLVKEAEIIV AHRQFPYRLSLSYPHRYVENTLIPISSEVRARISAGKAWHSLVPQM  
VQHIEQKGLYGFSAS\*

>SPSA8\_v1\_490015|ID:41146064|obg| GTPase Obg [Spirochaetes Bin 1 SA-8]  
VAFRREKYVPLGGPAGGDGGKGGDVIFVVKRNLRTLSYLRFKQTFRAQNGIPGMGRNMHG  
KDGEDMIIA VPPGTIHKDYDTGEILKDFGMSISGTGAEREGERWVFLKGGKGGWGNTDFK  
NSVNQAPKHAQPGQPGQERRLKI ERLIADIGLVGFPNAGKSSLLDAFTNARPKIAPYFP  
TTKIPNLGVLTLHDRDII VADIPGIIEGAHEGAGLGIRFLKHISRTACLAFLIDLSDDNW  
KEYGILKAELTSFSRELAEKPHMIIATKLDLPEARERFEEFRQMIAEPIFGISVFSGEG  
LEDLKEAFFNQVVHQEASDEPQTSTMGDLFGLEDELLEEGQQE\*

>SPSA8\_v1\_500001|ID:41146065| Aminomethyltransferase (fragment) [Spirochaetes Bin 1 SA-8]  
MPLHGHEISQSINAIEAGFKWACDFEKDFIGKQALLDIISAGPSRKLVGIEVTGGVPREG  
YE VAGADGAIIGRCVAGMYCPTVKKYANAFVEPAFAKSGTAVKVIIRGQPKDAVVIKRP  
LYIPAYRR\*

>SPSA8\_v1\_500002|ID:41146066|gcvH| glycine cleavage complex lipoylprotein [Spirochaetes Bin 1 SA-8]  
MSIDANARYAESHEYARIDGAAVVCGISDHAQ AELGDIVFIELPAVGKSLKKG ENFGTVE  
SVKAASDLYMPISGTIAEVNDALHADPALVNREPYGAGWLIKITPADLSEMDKLM DAKTY  
GKTIGEE\*

>SPSA8\_v1\_500003|ID:41146067|gcvPA| putative glycine dehydrogenase (decarboxylating) subunit 1 [Spirochaetes Bin 1 SA-8]

VPFIPNSNEDRESMLKEIGKNTIEELFLDIPEKLRFPVLNLPEGISEMEMLSEIEALS AK  
NITARKAAWFLGAGAYNHYPISLVPALASRGEFLTAYTPYQPEVSQGLQAI FEYQSMAA  
ELFGVSVVNASHYDGATALAEAVLMAWKQNLERNKILLPKDLHPEYREVLATY LSSFEVE  
VKEYEGAPENAAPDARTACVVAGYPDFSGQIHS LAKGAELAHASGALFIVHADPLL CALL  
ESPGAQGADIVTAEGQCLGNPMNFGGPF LGMMGATEKLMRKM PGRIVGEARDHDGKR GFV  
LTLTAREQHIREKAVSNICSNQGLVMLQACIYMAAMGH HGMKTVARLCYDKAHYAASRI  
AGLPGYKVGNTAFFKEFLVETPVAERIFEKLA KKSVPGLPLSRYDSSRPKELLVCVTE  
MNTKAEIDRLVELLEEVSA\*

>SPSA8\_v1\_500004|ID:41146068|gcvPB| putative glycine dehydrogenase (decarboxylating) subunit 2 [Spirochaetes Bin 1 SA-8]

MNLAPEKLIFELSSKGRVGCALPKSDVPSYDLPSGLERKELNLPEVDELTVVRHFTRLSQ  
KNYSIDTQYYPLGSCTMKYNPKANEVAASFAGWKFAHPLAGDVSSQGAIELIYKLQDSL A  
EIGGFEEAASLQPAAGAHGEFSGVLMIRNYLRDKGETKRVKMLIPDSA HG TNPASCTMAGF  
ITQTIPSDKKG NIDMKALKAALDDTVAGIMITNPNTLGLFETNIEKIARLVHRAGGLVYG  
DGANLNALTGVFKPGLAGIDVMHFNLHKT FSTPHGGGGPGAGMVAAGKALAPYLP GPVAV  
RKRGRYRLSMPEKSIGRVKLFYGNFGVL VRAYAYIRMMGRDGLRRIAENAVLNANYLRKK  
LEGTYPKYTRGCMHEFVAMGDIAPGIHTLDIAKRLIDYGFHPPTIYFPLIVPEALMIEP  
TETENRETLDAFAEAMLAIAEEARTRPELLHAAPVTPVGR LDEVA AARCPVLCYRGD\*

>SPSA8\_v1\_500005|ID:41146069| putative undecaprenyl-phosphate N-acetylglucosaminyl 1-phosphate transferase [Spirochaetes Bin 1 SA-8]

LPLIPFLAWALSATAIPAIMFYSHKKGLFDKVNDRKIHNGNIPRLGGVGI AF SFTATIV  
LLIVWRYGGIDSLNDHFSLLPIVLSGSVIFLLGLIDDLKDIRALYKFLVQLAVGIFLIAY  
GFRFKIIMVPWGDGTFELGVLSYPITLLWIIGITNAINLIDGIDGLAGGLSVIAASVFGI  
FFWVNGSLVSAQICFTLAGAILGFLIFNLPPASIFMGDCGSLFIGFLLSLLPLL GQHTTS  
VEIGLVSASTILAIPIFDTLMAIYRRRKAKVSFFTADK GHLHHILMNYNNSNWKTLASIY  
GITISLVIALSSLYSKPITSFSLKILALIAVFIFFLV V NREKLFMHKAEGEQ\*

>SPSA8\_v1\_500006|ID:41146070| AMP-dependent synthetase and ligase [Spirochaetes Bin 1 SA-8]

MYELKQMTLVEMI QKSTALYGDRPALCMAGGEQFSYREIGTRTKTIAARLLALGIVRQDR  
VAIAAESSPYWGIA YLGAVRAGAI VVPILPDFTPDQIKNILTHSEAKAVFCSDKLFNR LK  
DIELPVTLLDIKQGEIRKSPLVLDPAALSKESEAILAIFEDAAAEPDDTL MIVYTS GTTG  
LSKGVMLSHRNILSNALGCRSIIILHRNDRLLSILPLAHTYEFTIGFIIPFLAGS QIFYL  
DRPPAATVLLPALQLVRPTIMLSVPLVIEKVYRSSVKPTMEAIHLYKNRFFKPLI I K IAG  
MKLKKTFGGQLRFFGIGGAPLAADVEEFLKKAGFPYAIGYGLTETSPLL AGCNPQH THLR  
STGPALTGVAIRIANPRPDTHEGEIQAKGPNIFKGYFKDELRTKEAFTEDGWFKTGDLGY

VDEKGRFLFVRGRIKTMILGASGENIYPEEIEAVINQSPYVQESLVLEDEKGLTALICLKS  
EVLENLQSQLQDEADEV GALASRVGNALSNAEKSVADTMSQAFSSAEKAAEKLETTIKKE  
ANDKLAAFSRIRSVKLHAEPFEKTPTQKIKRFIYTKDAKAEDKKSNOEG\*

>SPSA8\_v1\_500007|ID:41146071| exported protein of unknown function [Spirochaetes Bin 1 SA-8]  
MKRYHTVIVLAFVFLALTSCSWMQAGGTGIIQLNFLNPGFALKKGVIEQDGAKSIVPSD  
SWAPARYEIQGIGPGGCTFSLSSSTNSSVKAKITPGAWTVTVTAYAQNKGELGTGQATCSL  
YPGKTTNQSVTIYPKEGKGSLSLAILKNLAVPEGSLKGRLEPYGLPGREFNPDAVPINF  
QLAASENSAIPEIDAGHYLLTIRLFNPDGSLAGGMADSVVILAGFETSGTCTITMGNPE  
LSLVSEFFPSDPLASPIMSVSHTVSDNASFVPLAIPGFPEVLIPHADLTIRWVFNAGEEGW  
NGAQITGNYGLLPQNTYAYLPFSRPFELSLLRADCVASSDVTNQS GSGSVFVERKMANEN  
NDAAWYGSYDYRTVSAPALFPSASQYMTGTGIRADVAAVAASPSGLIIVAGLDKSSAIHA  
FIAGYQAEARYDDTQAPFILPPSASWIRAWRDEVKINTSWRSPDRLAISSDSRYVA AASS  
ASNWLRLYTLDQNGNIIRNFDVTGSETGSMQNFNSNIKGIAFSADSSVMYVLTNSKEAVYA  
FNISGAAPLLMSCYQFSRINENTSLSMQDIAITTEGSIATASEASRIYVLKDVQGNLML  
DQTIEKPANGPGPVKQSLQALINHDFACISNGNLVQFYRKLASDQSYHIDSTFTLPAE  
AANA KSLAMTQGH LA VLGAQRVSFLNLDDELPIGIKYLVPDAIDTAGILQARSIVSVRG  
ACLLGCGSLGMVSVISLK\*

>SPSA8\_v1\_500008|ID:41146072|glgA| Glycogen synthase [Spirochaetes Bin 1 SA-8]  
MGEFPLKILMVSSAIPFAKSGGLGDAVSALAKALFRLGHDVRLIPRYYSIDKRQLEQL  
EGPMGVPIGKLELWTSVYRTNLPETDLPVYFLDYEA YFGRSGIYGSQHEYMDNPERFA  
LLSKAAFQLCRKLSWIPDIMVHDWPSLIPVYLKTTERNSEFKDTASVLTIHNLGYQGI  
YSKEHFSFFGLDWA EFGHSGFEYHDALNLLKAGITSADSLSTVSPTYAREIQT PPGFGFL  
DGLLRHRSREL VGILNGIDTDTWNPETDPYIPAHFSADNPEGKALCKEALQKTFGLPADP  
SVPVIGMVVRLTEQKGAEMFGPGYGAVPEVCRTMHAQFAIVGSGDAWCEKELKTL SHLY  
PHFKAKIGYDEKLAHLVEAGSDFYMMPSRYEPCGLNQMYSLRYGSLPIVHRTGGLADTVE  
NYNQETGDGTGFMFDDPTPRALYNTIGWAVWAWYNRKEHITLMRLKAMQSAFSWEKSAGE  
YIALYSHALALHASKR\*

>SPSA8\_v1\_500009|ID:41146073| conserved membrane protein of unknown function [Spirochaetes Bin 1 SA-8]  
VEKGKERKVYDYNQEKVQESLLRIFRSSKREATVADLAGLTGLPLQQQAEMPALSDEYR  
GRLKVTESGEILYSFPDGLKSRYRGFGPAIKKIWKAVKKG VIEISKALFKAWIVVMLVGY  
FVLFIALALFAMIASIAMQQGSGRSSRSRSDSRGGGGLGGLWLTGRLFDSIIRIWFYSELF  
KSPETRFRQAQSRAQRRPLHKA VFSHVFGDGDPNQGWAE TEKKA VVAFLQTHKGVMTMPE  
FIAITGRTPQDAETAISSYLLEFEGTPEVTENGALYFSFKLLTRIGTTPDIYGSSAPLK  
KLKSFSSNTKKADNTFRLINLANVLFGGYFLANAISVGNMFYINTARGLALRGGFPFLYS  
ATGYLFEMLGSANPVNLIWFGLGITPLFFSILFFAVPILRSIRLSRENEQIKAENLRKIM  
ANRILVQPLNFVPAVIEPMVPEAAPASPRTAELVSKELAAWAQA EPIEGTYRFDRIVEVQ  
KEIESIRSRIDIDSLKPGKTIFD SHA\*

>SPSA8\_v1\_500010|ID:41146074| conserved membrane protein of unknown function [Spirochaetes Bin 1 SA-8]  
MNTADSDKKTAAALRTFSLSPAGVFLSIISALCFSTLGIFATALYSMGFSVQQALAWRFTF  
SSILLWVFLAARVAARNKQGEKTAKPDTARLAPLLLLAFFGFAPQAGLYFITVKMLAPGI  
TSLLLYLPSFVLLISAVFLGRKPSRTQLFALLSFSGCALTFQPGNYPVLGLVLGVAV  
AVAYSAYLVWGELVLRHFD SIFATAVIMSVATLVYWG WVLLSGDSVRVPDSPMAWLSVIG  
IALFATVLPITTLFSAMRKIGAANVSLISTIEPVSTVLLSLLVFHETLTQGRIVGGALIL  
AAVIVLQEKSGSPRN\*

>SPSA8\_v1\_500011|ID:41146075| protein of unknown function [Spirochaetes Bin 1 SA-8]  
MNELTAQIXAIRRARGWRLYTENGRLLDFYQDQGRGVMGWKADGAARLAKALLDKALTA  
PYPSVWQKRLERAVLAWKPAFASVLVFDNETEA EQVFRNLSGLLG VVSNDTGPFTALEM P  
FAEFLPNNQDSGLLKN SKKLAIARLPLARSLAPGILL SKDASQELQACGKLPPQAPVA  
AFKLGAAVKSLQSLAAFHEKYQEALWTKIDPF IENLFSRKGPWLFVYPAL EHRSVFLNC  
LASGILISPAYDFPSLIPGEFDLGEIKVLADIARPGQ\*

>SPSA8\_v1\_510001|ID:41146076| Pentapeptide repeat protein (fragment) [Spirochaetes Bin 1 SA-8]  
MFTGGSFRLCFFDQAMLDSCDFSGVDMDFCSCGDADIIDSTFENSELIHVNF TGSRIRES  
TFSSNL YDSRFILSLISHTTFENCDFKR VYFIPEEGSEAYSVNNSNFMEAIRDVEHLYL

\*

>SPSA8\_v1\_510002|ID:41146077| conserved protein of unknown function [Spirochaetes Bin 1 SA-8]  
MKIYHHYSIYGFSNTYILGNEDTKSALIVDPAEISPLMIDQIENNEYRLSAILVTHNHIH  
HIRGLKTLMRIYEPTIYASNARLFGIVCRKVRDQDMLEEAGFSILAIAPVGHSDSIAYK  
VGNVIFSGDALHAGLIGKTTSSFNQALAEERLNSRILCYDDDVMIFPGHGPPTTVGTEKR  
FNLGLRPGFAKLLHPNYDFFV\*

>SPSA8\_v1\_510003|ID:41146078| putative L-fucose isomerase-like protein [Spirochaetes Bin 1 SA-8]  
MQRFTFTVASSVLHDSKSVDAIFSRYPQLLEAAGGRRIGAIADAPENEPVFFFVLTGGTE  
SVVLPQIQEAQLLAKRLPVVLLAHPHQNSLPASLEILAKIQDGGEGTIVLVKSDQDEQA  
MLEIEKLASIFKALIRVRSAAIGAIGEASDWLVASRHSPETVKKSWGAAIVPIDFHELQK  
KIDSIRKEGGADASYGAAAANKFLANASFIRESKPNDIYKSDTIYRAIREIVAERKLDAIT  
LRCFDLVLLDQSTGCFALSQLADEGIDAGCEGDIPAILALVWMRALTGKPAWMANPADIQ  
PTMETSAGRGTMLLAHCTVPRLLTGYGVRSHFESGLGVAVAGTMPQGPVTIVRIGGTVL  
DSVFLAEGTIIASPHEEGLCRTQAVIEMDGSALRELLEKPLGNHLVVVSGHWADAGRKYL  
KFAGLAKKS\*

>SPSA8\_v1\_510004|ID:41146079|pdxY| Pyridoxamine kinase [Spirochaetes Bin 1 SA-8]  
VAVLSIQSHVVFHGVGNRAAVFPLERLGLVPLNTVQFSSHTGYEGWTGMIFPAQHRLD  
VLEGLRKSGMLFSCEALLSGYLGDPENADTVVNIVKELRGLFPGFLYCCDPVLGDDEHGI  
YVKPEVLQFMHTEVLEQASILKPNRFEAELLSGIAVETEQDIKEACRILHEKGPAIIIS  
SLESRHKKKDTISMALSFNAGYRITTPRLNFSRHPHGAGDLASALFLGNFLKTKNPVTA  
FERMTNAVFAVFQATHQAESRELRVIEAQEAFAAPPELFHAEQIW\*

>SPSA8\_v1\_510005|ID:41146080| putative Oxygen-independent coproporphyrinogen-III oxidase 1 [Spirochaetes Bin 1 SA-8]  
MNLSQVLHEKASVLDKPQGLYINIPFCTARCA YCDFHSFVCSAVSERSRADYIEALFLQL  
DELEKILGTFQFRTIYIGGGTPTSLEDVLFRLLLGELRTRFRFAEEWTVEANPETLSDA  
KLNMLGENGCTRISLGVQSLDEAELHALGRKASAEASRTALERALKSGLKVSADVISGIP  
FSLQEGSARKPALLSNVEYLIKAGVQHISMYDLIVEQGTRIEQQLTRGLLLLPDEDAMYE  
ERKAAEAILAQNGYYRYEISNFARPHEESLHNQIYWSMESWIGLGSAGVSSLNASGSDNQ  
SCATVRFEGDRNLDRLFTQVSFLNVEPELVTPSDAELEMIMMGLRTRQGLDAMHFQSRFG  
RDPRALIANTLEKWA EYYIPDSRFVRLSDRGMDLLNRILVDCMDEIQN\*

>SPSA8\_v1\_510006|ID:41146081| protein of unknown function [Spirochaetes Bin 1 SA-8]  
MFGRHLTYTERVLLRRRRARIILSLLVLAGISLVHAFFLAS YTVAYDARSIGFDKAERI  
LATPLPFGPETILGKLPAFRNPKLGEAVVVSAGQSPFRPSSERLWLHLVRFFSLQALGEP  
ENISIGIVQAVPGQGISQNGSYTLDQDEIFLKFAASANGDGGTGT AIVRLSEIRASVVL  
VYWPLKHIRVP\*

>SPSA8\_v1\_510007|ID:41146082| Signal peptidase I [Spirochaetes Bin 1 SA-8]  
MPWSLSTPAEDASVNSMKHDEDFLTRLQRFTENLLTKRKIRRLKEKVKQQRNPILDWVY  
AIVWAACVVLVINQYFFQNYQIPSGSMEKTL LIGDMIFVDKLSFGPELLPGVAKMKGLAK  
PSRGQVIIFENPSYLSRGPIFTIAQQMIYMLTLTLVDIDRDQNGEQKVHYLIKRAVGTSG  
DTVKVVVRGEVFIKPKAGSSFIDEPSLMKGEGLPWKAARMVSKAEYADVEHVSVASAYQEA  
GLPLPASIGSPSVSNAYKDAFSYDMKRVAILRDINPAEPRYAMTAQRYSQGWYIPEGRIF  
PMGDNRDNRDARYFGPVSTSRVLGRALFIYWPF SRAGAIAK\*

>SPSA8\_v1\_510008|ID:41146083| putative PEGA domain protein [Spirochaetes Bin 1 SA-8]  
MKESKLPTLEEIEKTRVVLKPVFGISPRTYLPVIYGILTIVFLFFLLVYPGIVNNGSVLV  
FRGEPRLAAVYIDGAYRTDTTAPIFVKSGNHKIRFEYSGFSPHEQQA AVKGRLLGSLFFP  
RKQTIYQMADHPGRLVEESFAAFSSWSLTGKPSALYQLPPAISEPISNLASAGMLKDS  
SKFLQPSAIAGMTREAA FVRNLASSAVSAEAGRDALRAGTLVVSHGQPGPLGIATIRTA  
VSIAGADKGS AVFLYELLGKSAGKYLEKLSTLKN EAAAFSASATRPSPSGRLQAAGVSFV  
MFSKTSFQMTGETPSGNKFPYTVSVPEFGLAA TEITKNQWKLFMAENPFWNLKNKETLIQ  
QRLVDEDYLDSTWEETD SAPIRSISWHAASAYCSWLSGKTGSSYSVLLPSEAMWESAAVA  
NNGYDFGAQAVWAGADLTGPLPAASRGYGRAGLADLGGNVWEWTS DSYAYPALSAGTYA  
ASEKAVRGGSWGNAEGVIKPTSRGVMPAERCSAFLGFRPAIVKK\*

>SPSA8\_v1\_510009|ID:41146084|smpB| SsrA-binding protein [Spirochaetes Bin 1 SA-8]  
MSIPENVKVVAVNRRAHYDYFVDETFECGIELKGTEVKS IKGDKVSFPDGF AEVRSGEIW  
LKNFTIAEYSFSSVFSHPERPKLLLHAQEIKRIARKVQEKGYTLIPLSVYLKHGLVKI



ELGLCKGKKAFFDKRAVIKERDVEREIRREFRSRNF\*

>SPSA8\_v1\_510010|ID:41146085| RsmD family RNA methyltransferase [Spirochaetes Bin 1 SA-8]  
MRITGGKYCGRTVELPDSQLEIRPAMDRMRESVFAVLGDLTGLSFLDLFSGSGIIALEAA  
SRGAYPVACVEKDRAKFPILLKNVSISEQRIECHAMPVERFLLRNRQSFDFILFFDPPFPY  
AYKEELLSLAQSGRSLKQGSLLVLLHFPRENRIPTTLGALSVEDERAYGRSIVRFYRMK\*

>SPSA8\_v1\_510011|ID:41146086| Tetratricopeptide TPR\_2 repeat-containing protein [Spirochaetes Bin 1 SA-8]  
MNDTIPPPFTDESFDIPETLETEISEISDASKKGYQLLENRFDEAVESFAQILEKDREN  
NYALVGLGDAFRKRGSFKEAADYYRRCVLFHPGNSYALFGLADCYKALNQYHKAIEIWEQ  
YLLHDNTNITVLTRVADAYRKVHDFRKSIAIYQRVLEMEADNHYALIGLGHLYDFKEYK  
EALSYWQRMVDLQNEVDIRVLTSIGNCYRKLKQFDKGIPIYFDKALEREPEFYALFGIA  
DCYRGIGKQNQSLVYWNKILEKDPKNKVILTRAGDAYRNMGDLEKATQYYENALNIEFDI  
YAVLGLAVIARMQGHEDSITSLKMLIQNDPKNYRIYLELAQAYIAAGKPPQALDVLNEF  
QKLGIKNLFIQEAIKLSRSQA\*

>SPSA8\_v1\_510012|ID:41146087|rlmN| putative dual-specificity RNA methyltransferase RlmN [Spirochaetes Bin 1 SA-8]

METAGKIFPSGLFPAEIAQDAGFSDAFRRARQMYSWIVKGVSDFASMTNLPAAERERLASL  
YGLSRSSSVSSELESDGSLKLQIRLRDGSAVECVLLEDIEGRKTAACLSSQVGCMPMGCTF  
CRTGQLGFLRNLGPDEILEQYYFLKERRGFISNVVFMGMGEPLLNLPVVRKAIALLSDHD  
GIGMSMRKITISTSGVVPGLDLAKNGPKVRLAVSLTTADNELRSEMMPVNKSWDLAALK  
EALLTYQKITRERITLEVALTGNRNASPADARKLVQVVKPLHAQVNLIPWNSIPDLPFTE  
PDSNQLRTFSDIIEKAGLITVQRMHRGRGVMGACGQLGDTLILKE\*

>SPSA8\_v1\_510013|ID:41146088| protein of unknown function [Spirochaetes Bin 1 SA-8]  
MASLKARLERLKSLGLGLEPASELGKHRKEMQNRSDSSSEDGFARKKPESETKVCTRAD  
RTQESSAQGFLPGWEKLAPHVFMKITETSLDANPCVLSPRNFEPLRFAKEAARDVAHWDV  
PLEDISFFDLETTGLSGSGTIAFLAGIGWFAQSDFITAQIFIDDFPGEGAALGQIIAML  
AERSWICSYNGKAFFDMPLLRTRCIMNGIRFSEKAGHVDALAASRRLWKRTLGSALTDLE  
ESVLGHSREADVPGSEIPRLWLDYSNMRSSEVSAGMMAMMELICSHNRIDILSLARLVL  
LIQKLYENPGRYLALNCSGVSVDTNRLARHLIALGRIIEGCALLEESAARGDDEALFLLA  
RHYKSSRDRLNQRVLSALGADSYRACVEKAKFAEHVEKDYEKALFLAARAARIAETDSL  
NPIHRENCEKRIRIRKMGTL\*

>SPSA8\_v1\_510014|ID:41146089| Uncharacterized ATP-dependent helicase YprA (fragment) [Spirochaetes Bin 1 SA-8]

MAGYPGSTASFWQQAGRAGRRGAASVAVMVATSSPLDQFYALHPEYFFSQQPERGRVDLN  
NLYIYMDHAKCAAFEXPFQDSADSNFGISDKEDLEEALGMLEAEGVVRKTEGRWFWASEG  
YPGESVSLRSARSDNVVIVDTTNGAHTVIGEMDRPSAKELIFDNAVYIHNGTQYMVEKLD  
IGNRVCRVVKKDVVEYWTDSIVKTDLEVLTEDDDIAFEASSLEC VVGDLIRDQVQKFKKL  
RFHTHENIGYGEVFLPPEEMQTRAAMFIVKQSHAGLFLDSLSPAQAQDVLVSGAGKLLKS  
LVPAFLLCDPVDIGMIARVKDPHFQRPALIIYDKYPGGTGLSEALPDRAKDLFMAAGERV  
FSCGCKDGCPCVGVADVPGIKLISRQFLVLCFAADSLLSFNEHHRPRT\*

>SPSA8\_v1\_520001|ID:41146090| Arabinose efflux permease family protein [Spirochaetes Bin 1 SA-8]

MTLRERLPALASKDYRLWFFGQGISVIGTWLQNTGQAWLVLKLNSPFMLGLISTIQYLP  
SLLLSLFIGPLLDYRYPKRSILIVTQILFSLAALILAAAFSPHVQYWHIMAIAAFTGVLT  
AVDWPARQSFVAEQVGERSLVVNAVALNSTIFNIARVLGPAIGGVLIAAIGIPWTFNFNA  
GSYIAVITSLCFMKAGRNPRAKGGNFKGELRAGLSYIRKEKRIMLILIMIGFFSLFLMNL  
NILIPSAKLTGLSADRYGLLMSAMGFGSMIAGIIMSLSGKLVSPRLILIAAGFVLA  
AMVLTGLQKNFILSAILAACGFGMSSYATLCNTSVQILSTDEMGRVMSAYNLLFVGST  
PIGSLYCGKVSESGVFNAGFWISGALGLVFLIIVSLFVFPFVFARVSNLVLDGTQRDSTE  
SPS\*

>SPSA8\_v1\_520002|ID:41146091| conserved protein of unknown function [Spirochaetes Bin 1 SA-8]

MITFPFCPNKXCSLHQXPADASWFSKGFYYTKTFGXRRXQCKVCHTTTFSTQTFQAY  
YLKLIPLPDLVSRASGESLRAMGRNLTISPKTQVQNRRLERSRQSLAFHAKALSHLKKH  
DAVCIDGLVSFDTSQYFPSEIPIAITANSQFIIDFSHASRKRSGTMTKAQKEKAAALYRQ  
VSLERGAVSRSFKDTLVSAFQYQPPARFRPFILITDEKPEYQRVVFRLNEFRFQTDTTWF  
IHQRIWSKLPRTIHNPLFSSNYIEREVKDMAHHHRETECFNRNVSNGLMLRMGLYLMWHN

YAKPFRIRAKKGRPLTHAEAAGIPEWIITQFLNTLTEGVRAFFSRIKLTAAAMERTWVKG  
WMTPGKQAKDAIPAYVLG\*

>SPSA8\_v1\_520003|ID:41146092| membrane protein of unknown function [Spirochaetes Bin 1 SA-8]  
MNPFSLSETXNXLKLSAXSKLISLTLLSMASMNAQLPXLIALXASXLFHFIYRIKLD  
SKKMLLFILYISIFTSIIGIAPGDGRLFSIELLPRFLTYSLRLYTVFFFHSLFYSTTKV  
SDLGNMTRLAQKARKDRSQSELINSKYSDSMDPGMAISLTLFLPRSFSTYETIREAAE  
IRGYGLKKHKIADFLKILETFLIFSLRYALKTSGAMKIRGYSPLRTRVXQKFKLGDYFLV  
IGSLILVFPILC\*

>SPSA8\_v1\_520004|ID:41146093| Polyamine-transporting ATPase [Spirochaetes Bin 1 SA-8]  
MAELFKTEGLTHIFKSGRAGLRNLSLHIDSGSIIVLAGRNGSGKTLLVRHFVGLSTPTAG  
KVLFAEPVAQSIKKIRTSVGYVFQDADLQIFSQTVAEDVAFGPENMLPAEVVEQRVER  
ALSATHLEAMKNRRPETLSGGEKRRLAIAAGILAMEPECLILDEPFANLDLESIRDVVEIL  
VELHKSGLTLIVVTHELEKILPFADKLIILDNGELVFSGHPXDTPPELYKNHGLVCPLEG  
HFPWXYQDFSSFETKHKIGSTKKSNNPLRLLR\*

>SPSA8\_v1\_520005|ID:41146094| bioY| Biotin transporter BioY [Spirochaetes Bin 1 SA-8]  
MNPVNDKLTNSILACLFAALISIGAYIAFPLPGTPVPIVLQNMFIMIAALVLGPWWGLAS  
VFIYLLGAGGMPVFSGGTGGFMKFGVPTGGYLFYIPAAVAIGFIALKGGKGTFLANILA  
CTAGMAIVYLFVRLKFLVASSWGKAITAGFLPFIIGDIKITLAAILSPRLIKGLEHL  
SERESDG\*

>SPSA8\_v1\_520006|ID:41146095| putative Radical SAM domain protein [Spirochaetes Bin 1 SA-8]  
MLNLYFNMKRTFIRLSLVAIHPESENTAFIPLGVASIAAYLEQFIKNAGGQQPKLEITILE  
NRGEELTAGWILDRKPDIVGFSLYAWNTKRVFQLAREIRNSESAPFLVAGGPDAEYCAAL  
FRDNMSSEKTAEIFDAVFLGAEKSFHWFLDEFLGGTAALQSSPEFIPSIPCEPEE  
LVSPWLSGYLVPSADRDVAWEMTRGCPYHCTYCYEGRGSSRVRALPKKRLEAELELFEKR  
AVPKVFLDPTFNLNPARALSMIEMLAKKAPSIYWYLEIRAELVTPALAEAFARLPCSLQ  
IGLQSAADSAVLKTVGRSIDRKLFAEKIRFLNQSQA VFGLDLMYGLPGDSLESFFESL DFA  
LSLQPNHLDIFPLAVLPGTILYDQRVEFDLEAEPEPPYLLRQHFGFSRYDMEKAGKVAKA  
CEIFYSRGRAVPWFLAVLKPLKLPKRFFMEGLECLQAQDWKHQSMTHRQIEELQIIALR  
SIYEKMGKEKLLPAVQDLVRYFGALSRA YAEQERSRITLNYPLADIESGFLMRHIERYCE  
RHQPSPAKIEISPSKKGPNVKIL\*

>SPSA8\_v1\_520007|ID:41146096| protein of unknown function [Spirochaetes Bin 1 SA-8]  
MDSLIRKSETSIAEALASWQAQLTQKGSSEEEVAERYVSRWTS PNL SHVMKIRTALVLG  
LEEYLASEGLVNIDRVTISPVTDPLCHGVEHVVPVISYQNVPYRTTHSMIYSKFLACMSPH  
IPGVFIDSPNIRLELPSSDGSMRKKYLIDFSQMDIERRRHTPIASDGYFRDPDTVTRILQ  
EDRDALDFEDLIIHAVKKVRSSCESL KALGIALDIPQKPFPRFFKDEWLEKGESEK G  
LEKKGKIAGTQFFWVLGLLRENYDLVYPFLQEDGSIPEPGDITSRQIFNYDLCAAAYL  
DGS LGDAWEVLSGGLREWFFPAIARLLANNVLREAPVFDGKGNITNLDKLDGYGPFLA  
ASMKDSGGEPIFPQTFGGGLGIERSL FALLQGPKIRQIEEITYFGKNPDIPGPFLF\*

>SPSA8\_v1\_520008|ID:41146097| conserved protein of unknown function [Spirochaetes Bin 1 SA-8]  
MSEYLTVDPERQLKLDIIGKLHQGVPVHEVKREFGRLIQGVSAAEVAAMEQALIDGGMP  
VEEVQRLCEVHVEVFEQSLAQNGNPKKTPGHPVYTLIEENRRAMTALKEKNTARAFRWG  
MSSRD TAAAALENASKIIHYTRKENQLFPYLEKHGFTGPSRVMWGKHDEIRELFKEARL  
ALDQGGKAFAPKAAAIAQKMKKMIFMEEHILPEAVRRLSEREWAQIRLGEDAIGFAWVK  
PEALYDAALVLATEQKKDQLMTEKVETPKAPAAAGMLNLDGTISAELLNLALKTLPVDIS  
VVDEDDHVLYYSDSPHXLFP RSPAVXGRSXQNCHPQKSVETV NKILSXFKKSEKDSARFW  
IEMGGRFILIEYALRDKDGKYRGTLEMSQDLTELRALQGQRLLDWD\*

>SPSA8\_v1\_520009|ID:41146098| Cation diffusion facilitator family transporter [Spirochaetes Bin 1 SA-8]  
MGFSANEADLKSETEDMEDRIRLIRTASWIAIGGNFMLAAMKIIVGFIAGSLAVLSDGID  
SSTDVLIALMTLLAAGISAKPSDKEHPYGHGRIETVASAVIAFIVFFAGGQVFVSALRAI  
FSSEPASMPSSLALWVTGVSIAGKLALTYSQFYLGKKSNSAMLIANAKNMRGDVITSAAV  
LIGLGLTFLTGIPVIDKVLAMLVALWIKNAGIFLEANTELMDGTTDHGYPYRDLFKAVS  
DVPLAGNPHRVRLRRIGSMFVADMDIEVDPDMTVREAHEISQQVETS IKQALPEIYDVIV  
HIEPHGNVEEEKFGLTSK DTH\*

>SPSA8\_v1\_520010|ID:41146099| FAD-dependent pyridine nucleotide-disulfide oxidoreductase [Spirochaetes Bin 1

SA-8]

MQHYDTVIVGTGPAGLGA AFELQARRPQDSILILDKNEMSSGGLRNDCKMNFSPWIGFPE  
TCWDEVTASYLKRVEDFLQPAIMERKNIRTYVHRAEKIGVKLLEIRQSHLGTGGIELI  
KQLTARLQAAGVSIALGETMKTMDASAKVITTDKREIHYTDLILAPGRGGFAFLQDMMNL  
CSIPYRDNIVDIGVRIETREERYPIVKDYD PKFMFPKKTTRTFCTNSRSAHV VQERYGDP  
ETGYWYSVNGHAWSSSRPANGLVNFAMLKT VTLTAPLASGQAYARMLGMQASLLGGGKPI  
MQRIGDFRLGKRSFAESFTGDLYDFEPTLPSCTPGDIALSAPAKVLNAIWNGIKLLDSIV  
PGLLHPSTILYYPEIKLYANKPVFADQHFKVAEGLYLIGDGAGTSRGITA AWASGLRAAD  
GILSERS\*

>SPSA8\_v1\_520011|ID:41146100| conserved exported protein of unknown function [Spirochaetes Bin 1 SA-8]  
LMKRIGFFALGLAVIALLFACGPAAPKTVKFGVFEPLTGANAGGGALEVEGIKLANELYP  
TVT VGGKEYKIELVIADNKSDKVEA ANAAQRLVDKDKVHVVLG SWGSSLSMAAGPIVKQA  
KTPAVGLSCTNPLVTKGNEY YFRVCFLDPFQGTVMATYAAKELGAKKAVIIREVSN DYSV  
GLAKYFVDSFKQLTGDDASILAELNYNTGDTDFAAQLTEIKKFKPDVIFAPGNFTESALI  
IKQARELGKTPFLGGDTWETPEXX

>SPSA8\_v1\_530001|ID:41146101| ATPase and specificity subunit of ClpA-ClpP ATP-dependent serine protease,  
chaperone activity (fragment) [Spirochaetes Bin 1 SA-8]  
VFGQDQIDA VVRRAVKRSRAGFRAPDKPVANFLVFGPTGVGKTELARQLAKHLGITLHRF  
DMSEYQEKHTVSRIGSPPGYVGYEEGLLTDAIRKTPHAVVLLDEIEKAHTDIYNILLQ  
IMDYATLTDNQGRKADFRNVILIMTSNAGARDVGKALIGFGDRSVSNALDEA VERTFTP  
EFRNRDLDAVVHFNNLPMPMIEKIVLKAISEFNTQLAEKHVELIVPDHV VHF LAEKGSRE  
FGARNIGRLIEDRIKSFFVDEVLFGRLEHGKAIADLEGESIVFHVEAAASA AVPPTEAV  
PAG\*

>SPSA8\_v1\_530002|ID:41146102|aat| leucyl/phenylalanyl-tRNA-protein transferase [Spirochaetes Bin 1 SA-8]  
MLPYLQTSRFFDESHDFVFPVS RATREGIVCLGGNLSPGMLLSA YRRGIFPWYSDDEPI  
LWWSPDPRFCVLPSTLHVPGSAKKLLKKNRFSITVDTQFRAVITECALISRPGQPGTWIT  
PEMQEAYIRLHELGYAHSVEVWENGLAGGLYGVSLGKAFFGESMFSRVSGASRAGFLTF  
AAVLFEKGYELIDSQVHTDYVASMGGVDIPRARYLALLDTALKHETHKGLWTDFFTSGRW  
\*

>SPSA8\_v1\_530003|ID:41146103| protein of unknown function [Spirochaetes Bin 1 SA-8]  
MKIIFVQLPVQEPNWEDAAANVT LAAGYLTA YAESRGLLRSEWSILDAATSTYGS DAAI  
VDRIQRQEPDIIAFSLYAWNLERSLFIAERLRSMLPRTRLIAGGPEVVEDMPIAHHS PFH  
SLVAGEGEIPFAQILQDIRLHRPLDRIYRADTLVDLATLPNPYLAGTLP IVKDEPVHIET  
VRGCPFHCA YCYYGKNFPTVRRYP EEQALELIQRACKAGSSEINIMDPSFQFHPDL DKRL  
ADFAQANTARLPVHTEMRL EGVTAAATAELMKKAGVQSIEAGLQSINPKALEAINRKFDME  
KFVHGLEQLQNQDILIKTGLILGLPFDGYEQIVETFD FLGMHGLGQDAELYPLSFLPGTE  
ARARADEWGMARMELPPYWVTSNDWISSNDMIDVIAAFEESFEREWASPPAPHFTANS GG  
LTGFVDARKVENIDWMRLNPEKLANSMTLLADADDPELSRLVRAARDLRRDNPFTLYQI  
VLTSNTRIPSERLIEKIRDAFVFEDHY YELSHYFSPDLQESYQTRMFFATKNFALAYRAM  
EEAQDLETMVIISGKAGYNADRLSELLPFVIFDRETIPFDRLYELLSIYTEYPHMLIEAP  
EQLFRT\*

>SPSA8\_v1\_530004|ID:41146104| D-isomer specific 2-hydroxyacid dehydrogenase NAD-binding protein  
[Spirochaetes Bin 1 SA-8]  
MRIGSFMPVHSVW GKHL DQLKKEFPEHEFLSGLTDSSTE AATLDIILAGRLEHATYLASP  
ALS AVFQPF TGINHLPLAEFAQRGVRVFNVHANAFDVAERALAMTLAFYGR LIEFHNDLR  
QDLWHGFVWRAGAEDNWD SLYGRTCAILGTGAIGVELAKLLKAFSCTVYGWRRNITKGAP  
EGFDMVLSDLQETISKA EIIFIALPATPLTEGLLSHEILLSMKDKFLVNVGRGSIVDEAG  
LYEAEKKILKGA AIDTWYTYPPVGKVGAPSRFPINKLPQVILSPHVGGSTNQATLKA VD  
VTIANIRDYLR TGTCRNEADLSAMY\*

>SPSA8\_v1\_530005|ID:41146105| putative ankyrin [Spirochaetes Bin 1 SA-8]  
MVQKKRNRRLSILSLLSPMLLALIMLTLMLFASCQTTPAQKEASLTELVISGDLNAIKKY  
YSNQEQNLN MKDADGLYPLHHA VKRGDPQIAEILIVLGAKTDVLD PAGKTP LRYAIDRKQT  
AMARMLVDRGASLFIADAAGKTS AEVALSAGPDMISAVFSAKNINESGADGR TALHMASD  
RLMANEV SLLLDMGASVQTKDKAERTALDLALQHPEDKRAAIIAEKLIKGANPSLPAFS

DFTWFATTVRSSDYRTVRLSNGNTPLHEAVRLFQLGFVDFLLSREVDPNKKNLSGDAPLH  
LAVRTGWYDGAELLLKNLADPDIRDAQERTPLHLQSPAAVRLQMTKLLLKYKADPNLKDS  
MGNTPLHLAVKYSYEPSVIEEFLKANAPVNAANLDGDTPLMLCVRAGTYQYAAALIQYGA  
DIFLKNNSNESSLSMAVSRGTGAVDKIVLPSNVLQRDNNGNSVILTAVALKGSPEVVSLI  
LQKGGDPNIKNNFGDNALHVAVRNNLADQGGILINAKTDIFAINAASETVPVFLALSADKDG  
PYDWFFTPSVITARDVNGDTVVAHQARKNLKGLAYLKGRGSDMAAVNTTKETLLHVAAK  
SNAADALRYLINDKADMEARDNNGDTPLQASVLADSLSCMQLLIASGADLNARNFSGESV  
LHQAVRKHNLAITQFLLGKGSGLNDRNRGQTALSVAAREAQADIARVLLTAGAIVDARD  
YSGSTPLYYGVETSNLALIGVLVKANADVLAKNASNDSPLLAAMKKGPSVMRELLSGPTK  
DRADSEGKTPLRILVEARASLDTLNLALSGGADPNKDKLAGTPLHAALRQKDFQTAGLL  
LAAKADPFAPDSSGQTPISLVLTDVVALKDFVMAAGVNAADIKKEGFLFYAVRAGSREAV  
QILLDLSIDKTQRNISGETAFDIAVAKGLSEIAAMLQ\*

>SPSA8\_v1\_530006|ID:41146106| RNA polymerase sigma factor [Spirochaetes Bin 1 SA-8]  
MAKRSDQDRKNFPLNQTSDSKNHDSAQPQRHKTPKRHAIDKDPLSLYLQISKYPLLNAE  
GEQRVGKQVHDCQQLKALKAQREIEQQSGAQNTAAPNPAEDTSIDEAIRLTEENLKA  
QEMITSNLRLVVSIAKAYQHRGLNLLDLIDEGNIGLLEAVEERYDYSRGYRFSTYATWWIR  
QAIKSLADQGRIIRIPVHMLXTIRKCFYASKQLTQELGRAPEISELAERVEMTEEKVLK  
VIEFSQNTASLDSAIIDDNKSSLSVISDEEGLDPYSEAFSVTMKELLDLDCVLDGLSTRET  
TVLRLRFGLSGEDPHTLEETGKVLGITRERVRQIQERAIEKLRQRKELSECE\*

>SPSA8\_v1\_530007|ID:41146107| putative LysM domain protein [Spirochaetes Bin 1 SA-8]  
MMNVKRSILLSILLCIVTAGMAFAAGPVTHTMQKGETLYSIAKKYNIPYESLAAANGISD  
PTKLKIGTVLVIPSVHLVSKGETLYGIARLYSVSLDELLTANKLAASYVLKPGDILVIPG  
GKPDGTGTTVTTAAAPSTTVAPSTTTTNGIATTVPPTTVAPSTTTTTSIGTTAPATSSTVP  
APVPIPEPVKTQDKVVDPKAGWPAPGKVMYLDGKLEGVMIRVKPGEIAKAIASGTVVSAG  
PSRGNFNVVVFVQAKSGYVYVYGGNETLLVKTGDTVKAGTELKIGIDSKDNSPIAYFFVF  
RNGQPIDPALAPRE\*

>SPSA8\_v1\_530008|ID:41146108| Diphosphate/fructose-6-phosphate1-phosphotransferase [Spirochaetes Bin 1 SA-8]  
MNERSPLHNVRFAIYPKMPEIFNLPTASIKAIPTIEVIEPKVDRDTLKGIFSHSYGKPAVK  
FAQGENIFAGKTMAVGVLLSGGPAAGGHNVIAGLFDGLKKNSPGSKLIGFKGGASGLLDD  
KSIEITAELMDSYRNTGGFDIIGSGRTKIETPEQFEKALATATNHKLDALVVVGDDSN  
NAALLAEFFASRKAPIAVVGVPKTIDGDLKNEWVETSFGFDTATKLYSELIGNICRDAAS  
GRKYWHFIKLMGRSASHIALECAFQTRPNIALISEEVEARKMSLAQIVDSIAVSVTARAA  
KGENFGVVLPEGLIEFIPEFKVLISSINDLLAHEDEAFKQLPSVAEQRKQFVAKKLDTEA  
SALFTSLPEDIQAQLCWRDPHGNVQVSRIETEKLLVMMVKERLATLSKEGSYSGKFDYQ  
THFMGYEGRCAFPSNFDADYCYSLGNA AFLALNGYSGYIASIRNLTAQASEWIPGGIPL  
VSMNIERRHGKDKPKVIKKALVELDGKPKFKHFAEQRAKVALSSDYRIPGSIQFFGPPAVT  
DATMTLQLERS\*

>SPSA8\_v1\_530009|ID:41146109| conserved exported protein of unknown function [Spirochaetes Bin 1 SA-8]  
MKKRIILASLAFLLAAFGLFAQEIVTAEQFFNKISDKYATINDYEASIQISSGTQPMNGK  
LSFRAPALLRIDFSQPAEQVIVFDGQRLVVYIPQYRAVLQQETGANSVGAGAAALASRDG  
LAMMKRTYSLAWESSQPVPPLDSGSQEMVQRLMLTRKSAEAGFKTIRLSISPATLLIRRI  
EGWTVANEKITFDFTSIKLNQGIPATRFLYDAPASANVYNNFLFQ\*

>SPSA8\_v1\_530010|ID:41146110| protein of unknown function [Spirochaetes Bin 1 SA-8]  
MARIGSIIQETRLKKGINLDKVADETNISVRFLKKIETDDFTGFPGEPYVVGFIIRNYAEY  
LGLDPEAIVTRYRADEASLAERKQEEPAAPSMAGSSETETHDSELPEEEKPHSKGAGAAS  
QQAFPAGEKPAAKKTKXX

>SPSA8\_v1\_540001|ID:41146111|lpd| Dihydrolipoyl dehydrogenase [Spirochaetes Bin 1 SA-8]  
MSDYNVIVIGGGPGGYLAAERLAHHGKKVLLAEKEFLGGTCLNIGCIPTKTLLNSAKHYH  
NALDGRDFGIHVESVRCDWQKMQAWKQEVVEKLRNGIAFAEKKLGVEVVHGAACKLAASGR  
AVEVDGRILSADDIIIATGSVPVMPPIPGSQGNPQVLDSTGLLGIGAVPERLCVIGGGVI  
GIEFASLFSALGSQVEVVEMLDEIVPFMDRETAPVLRKALKSVRFNLGCTVEKIEGGTVF  
YRKKDGELATSVDYVLMVAVGRKPMIEGWGAREAGLDVSQKGVAVDDRMRTNLPHVWAVG  
DVTGRSLLAHSAYRMAEIAAANIADGEQAVRRGERMRWDCVPWAVYSIPEAAGIGLTSQE  
AERRGLHALSVSVPLKTAGX

>SPSA8\_v1\_540002|ID:41146112| 2-oxo acid dehydrogenase acyltransferase [Spirochaetes Bin 1 SA-8]  
MAHSVMPKLGNTVESSIIVKWHFEEGQRIAQDDVLCEIETDKATMDVPAGASGVLLKRL  
HAEGDDVPVLAPIAVIGEPGELFEAAAGAAASAGDSVKAHNQEPEAQNRAAASPTGSAA  
ANNPAGMVAASPRARKLAEKGMISLDGIAGSGPHGRILERDVSAVLQNPAGFSSAARGAA  
GRGNPEIGAALSGESGSLGGRLASDVARLAEKMRESDAGAAGQADYTDEPIKGIKII  
SDRMLHSIQSSAQLTLNSSANADQLLALRARFKQSAPSLGLSGLTIGDMVAFALSRVLP  
HPALNAHALPGIVRKFRHVHLGLAVDTPRGLMVPVIRNADSLSLKEISAQSKQLAKACVE  
GTISPDLLSGSTFTLTNLGAFGIESFTPILNEPETAAILGLCSIVPRPKAEGNGSEMRLGL  
SLTIDHRIVDGADGARFLKDLASVLAEFDLYLLAEGLKD\*

>SPSA8\_v1\_540003|ID:41146113| Transcriptional regulator, DeoR family [Spirochaetes Bin 1 SA-8]  
MEAALNLELTERESLILDMLAREGTLAVSALSRTLGVSEVTIRSDLKSLEEKGFYRTRG  
GAYPSFHKDILERQRLNMEEKNRIRAAAEAVQDGDRIEMIEAGTTTALIVRYLTGRRGVQ  
IVTNSTLVFSYARLNALNIIITGGIFRKETESLVGPVALRAIADFNVRLAFVGTGDFSL  
ERGMTTQLVEGAEIVKAMRNQADETWLVADSSKYGKTGFVSVLPLSEVDGIITDERLDP  
ARQRMSEQSIRFRLA\*

>SPSA8\_v1\_540004|ID:41146114| putative Diguanylate cyclase [Spirochaetes Bin 1 SA-8]  
MTKKTLIVWGAVLSLCLIIFFGIHYAYRLPEGAAQVQTGQVVTMPSGKTIDVSGEWYIGG  
IKTPDFQPGVYSVRMNVPLSEPHVGAESREDYILVFPVSDGNALRVFFNGHYIGSQGDIA  
QGNNSNIWYAAKFFTVPAAIVSAENTIAAEIRGVYEAGISRLPYLIQKSKSPYLSWLSFS  
TRGLVVILAGAIILGFILIFMGFGMYPQNNRSLILGIACFLTALFLTDFMNLEYLPVSL  
LAFKKMVVIARHLAAITFFIGFLKLEHPSDIFIRIFVVIQIACSAILLYPSEVHLLKQF  
YTVTYLTILPLPLYLLYFLFKRLQKKEYSILLAGVIFAMLTAIRDVAIPLINPGALYFS  
HFGFMILIISAAWFIVNDDIQHFRLLIQEKTRSEQYRHESLHDPLTGAYNRSMLEQAQRD  
LPSDFSLILIDIDNLKEINDSYGHLAGDYALRNLSVRSRTQNLIRHDDLIRYGGDEFVL  
PHCPSERLASIVENFDAEFSRSEVALQDQGIFTYSVSLGSMCMSSNRSCSDSFEDALVR  
ADEKMYENKRLKKSNSRIARDQA\*

>SPSA8\_v1\_540005|ID:41146115| Dihydrodipicolinate synthase [Spirochaetes Bin 1 SA-8]  
MKNIQNGVWPTMITPYNADGTIAYETLEKLIDWYIEKGVAGLFAVCQSSEMFLSLRERL  
ELAKACIRFADGRVPVIASGHVSDTLADQIDEAKMMADTGADAVILVTNRFARKHESDDV  
FKKNLDIFLKNFDRDVLGIFYECPAPYKRLLNADLISHLVATGRFGFLKDTSCRMADIRA  
KVAAAAGSGFKLFNANAATLLDSL RAGAAGYSGIMTNFHADLYVWLCKNWEADPELAEKL  
QNFIGLASVIEYQLYPVNAMYALQMEGIPFNLSRRADAGKFTESMKLEVRQLMEVGSQY  
RKFIKQELYHA\*

>SPSA8\_v1\_540006|ID:41146116| TRAP transporter, DctM subunit [Spirochaetes Bin 1 SA-8]  
MNVALIVFFLTFIAVFLLRMPIGIGMMVSSVFYFAISKHPAASLDMVATQFLTNMNSSFI  
LIAVPLFVFMMAEIMNSGKVTSMIFSANALVGKKKGALGHVNVIASIIFSGMTGSALADA  
SGLGSMEIKAMKENGYYDDGYTCAITAASAATIGPIPPSIPMIFYAMLSGASIGSLFLGGI  
IPGLLIGAALMLYTAVIARKRNYPEGNKLPREFIVLTLKSIPALFSVVVLLGGIYSGIV  
TPTEAGALAAFYALLVSIFFYRAFKNWDFKNVLINTVKTGTLSLLVGCAYAFSYIVTIE  
KIPNLVASLLGMTNNKYIMLLLINVLFLILGMFIDTMAITLVFIPIVIPLINALGINLV  
HFGVVIVLNMIGLSTPPYGMLLFVVAGISGTPLKKVIKEILPMIAVIVVVFLITYIPD  
FVLFIPRLAGFK\*

>SPSA8\_v1\_540007|ID:41146117| putative Tripartite ATP-independent periplasmic transporter DctQ component [Spirochaetes Bin 1 SA-8]  
MREQSSLKKGAMFFVNLIELYIPIATFVVVLFVSFMTQIVARYFFKPLIWPEELSLMCFVW  
TALLGGLYAKRTNSHVAFSMVYDSAKPETQRWMRLAGNLLMAAALIIVYVPSWEYVQFMA  
YKSDALRIPMNWAYYFPFMIFL TDMIVRVVIDIVKDLKKPAGGGEQ\*

>SPSA8\_v1\_540008|ID:41146118| DctP family TRAP transporter solute receptor [Spirochaetes Bin 1 SA-8]  
MKKFFLLVLA VLMIA TPAVFAQNKVNLVFTSVSVPGDAHTQAMFVFKDEVEKLSGGQIHV  
DVYHSGQLFTQQAQDAIRKGTVDMVYTSAQWLAEFIPYLSMFGAA YTFQSYDQMTKTFN  
GPIGQKIFEEVAAKTGIRPLTAYYLGTRQLNLTAKVGPVTKPEQMKNVKL RVPNSPTWIA  
MGKALGANPTPMAFNEVYMGLKTGAVDGDQDNPLPTDKNAKFYEVTKYIVLTNHVVDSTWP  
SMNEKKWKS LTK EQGWVLA AANKAREFCDKTNLDNEKNILDFRSEGIVVIENPDRAAF  
AAAYAKNSYLTESKDISKA WDL DLYDEIQKIK\*

>SPSA8\_v1\_540009|ID:41146119| Transcriptional regulator, IclR family [Spirochaetes Bin 1 SA-8]  
MVNTVAKALQILDALSESQPGVSDLARNLGLPKSSVYSILETLVSEKIVEKNMQTGKYS  
LGVKLIELGNCAQTGLDICRIAAPFLQGLNVKFDVHLLTVLDNYEVLIDCIESRRRLR  
TYSVIGVRAPLHCTSVGKAILAFLPDDEIRKIVAEEKGLPVFTAATIASPERLAAEVDITR  
KQGFADNMEHEEHLRCVGAIFNSQGSVFAALSLSGPAERNTMERILEMALEVVAAGLE  
ISRRLGWRGEPQSMRR\*

>SPSA8\_v1\_540010|ID:41146120|oppF| oligopeptide transporter subunit ; ATP-binding component of ABC superfamily [Spirochaetes Bin 1 SA-8]

MSEHDTLLEVRGLKMHFPIGKSLAKNRGFIYAVDGVDFSIKRGETLGLVGESGCGKSTT  
VRAVAQLYKPTAGEVILKGDLDTKMAPHDLLAARKNMQMVFDQPYASLNPRMTAGDIIAE  
PMRIFQKRGLLDISNDERNDRVEHLMKGVLSRFFKNRYPHEFSGGQRQRIGIARALALN  
PEMLCDEPVSALDVSISQILNLFKDLQQEFLTYLFIAHDLAVIQYISDRVAVMYLGV  
IVEISGSKDLYKNPLHPYTQALLSAAPIPKIEARRQRIILTGDVPSPKQRPGCYFYD  
RCQKRMDVCKTCRPQLKTTEEGHQVACFLYHKPE\*

>SPSA8\_v1\_540011|ID:41146121|oppD| oligopeptide transporter subunit ; ATP-binding component of ABC superfamily [Spirochaetes Bin 1 SA-8]

MTDEVILQVRDLKTYFTVDEGVVKAVDGVSFDLHKGETLGIVGESGSGKSVTNLSIINMI  
PNPPGKIVGGQVLFSGKDLLKISASELRQIRGNKISMIFQDPMTSLNPFLKISTQMIETI  
VLHQGLDKQAAKEKAIDMLKLAGIPAPEKRIDQYPHQFSGGMRQRMVMIAMGLSCNPEILI  
ADEPTSALDVTIQAQILELMQELTKRLGTA VILITHSLGVVAGMCDTLCVMYAGRIVERG  
KTDDIFEDPKHPYTQGLIRSVPRLDKENADRLYSIPGQPPNVIDLPDCCPFYPRCEKAKD  
ICRKKYPPVTGFENGRAVSCWLYAEETK\*

>SPSA8\_v1\_540012|ID:41146122| oligopeptide transporter subunit ; membrane component of ABC superfamily (fragment) [Spirochaetes Bin 1 SA-8]

LVRELGYQKEALEKVKTEMNTNPGYQKVYILGTDDLGRDMLARVIYGGGRISILIGIVGTL  
TAALVGILIGSVSGYVGGWLDNLLMRFDIMYGLPYMLIVIIIMAMIGEKAARGSFVILFV  
AIALVSWLTARVVRGQIISLKNSEFVEAARSMGASTPRIIFRHLNPNTLGVIVVFSTLL  
MPSFIMNESFLSYLGLGVSAPNASWGTLVSEGVRAMEFYTWQLLAPAVAMTLFLFCMNFL  
GDGLRDALDPQSKNRT\*

>SPSA8\_v1\_550001|ID:41146123| protein of unknown function [Spirochaetes Bin 1 SA-8]

MLKVIVGSTDIEKADLAKGARNYLIQGGMKAEQIEALKTRLASPVLLERLSSKPFAYTI  
FVTPECLFSQEFAS\*

>SPSA8\_v1\_550002|ID:41146124| conserved membrane protein of unknown function [Spirochaetes Bin 1 SA-8]

MNEQKSNQVKTWFLWSLAAAAGFTALIAVLSPALQRFVKPEDQGPSWYYWQLAEPNFWTH  
FSAWALYILHQVFTWVVAARMMLKEGNHPDRITNLNKTALWGNLGFMALHLIQTHVLYDGL  
AQDVPVWSSQWSVIFMLIIMIYLLIPRRGIAFGLNVPLKRRVYGWIRKYHGFYISWALVY  
TFWFHPMEGDYGLLTGFFYMFLFIQLSFAGTKLHTALGWLTVLELTVGLHGPAIALQKY  
LAKYAGASIFADIWPMFLFGFVGVFVVTGQYGFKLKGNARIAVYATYAALAILVYSFRGF  
GRLFEIVFIPIALIGGALLMAAAGNILSGKDGLVPLRRVSSEKK\*

>SPSA8\_v1\_550003|ID:41146125| Ketol-acid reductoisomerase (fragment) [Spirochaetes Bin 1 SA-8]

MRNSFESKVFKTETVWFGPHEEMVVRGGRNLFLLPKAFDGRQIGVLGWGSQGPAQAQN  
LRESLEGTNIKVKVGLRSGSASWKAEEAAGFTEANGTLGEMMAVAGSDLVLLIADAAQ  
AELYPELFKVMKKGATLGLSHGFLGAMKINGDRFPAHLNVIGVCPKGMGPSVRRLYVQG  
KSVNGAGINASFAVEQDVDGKATDYALAWAVAIGAPFIFKTTLEYEYKSDIFGERGILLG  
AVHGIVEFLYRYYQAQGMSPPEAFRHSAESVTGPISKTISHKGIMGVYESLSEADKKVFR  
KAYGAAYAPAFETHYENYQEVASGNEIKSVLLAAERMKRIPMGKIDESSMWKVGEPRFRS  
IPLPQGSISPA\*

>SPSA8\_v1\_550004|ID:41146126| Ketol-acid reductoisomerase (fragment) [Spirochaetes Bin 1 SA-8]

MMAQIDLLAEKGHAYSEIVNESVIEAVDSLNPFMHYKGVSFMVVDCSTTARLGSRKWAPR  
YDYLLMQQAEPWSRGAGEDSALWEKFMHHPVHAALATAASMRPSVDIAVVG\*

>SPSA8\_v1\_550005|ID:41146127| putative Glc operon transcriptional activator [Spirochaetes Bin 1 SA-8]

MTPALMQNSETTSADESKVFSYIQEQIVSGRLKAGVKLPSEKQLCEILGVSRGYVRKALS  
RLEHYGLIKTLPQRGTIVAEMGSKAISGLIANIGSFEETFTPGDLFEIRELLETYA AAKRA  
ARLANQDSLEEILKWHIEFKQKAENGERALDEDHLLHIAIAKASGNPVCLSLISYITPQI

IALNTDFSEKDPARFRNTFEEHDRVKAILAKEENAAEIAMYHHMREARKRRFST\*

>SPSA8\_v1\_550006|ID:41146128| ABC transporter, solute-binding protein [Spirochaetes Bin 1 SA-8]  
MKRKIMFLFMIVASFALVMAPWAQTKPVTVTHWYWADNPKYSAEMQKIAADFNAATNGKGI  
TVIAQEYPPWDGGAYSETLFRVIGGGGPDTSFSLTSTPLFSANGLLVNLD SYLASWKDK  
DKIEPSLFDVMRKASGTSVYVMPWNTQVLYVYRPSLMKKAGITVPKTYAEFLEACKKL  
TMDTNGDGKIDVYGFGRGAKGGHEPWGSFIWARGGNFDDFTTPQAIAGMQDFIDLFKNG  
YVPPTAPMDGFNEIANFKSGKTAMTIHHIGSSIGMMDTFGDDVDAFAFPGGAGRWTSMG  
DTENVMLKSAKNRDAAFEWLAYLATGKGQEA WCSATGNVPVSKDVQKLPFFQNNRFMKVS  
IEGAPYAGIYPILDTTTEWISTIWPNTIAAALTGKMSAADAMKQLQKGLWGK\*

>SPSA8\_v1\_550007|ID:41146129| conserved membrane protein of unknown function [Spirochaetes Bin 1 SA-8]  
MRKKTTPVWPYLLLAPALATILAVVFIPVINA VLMSFQNYDLRRPSQIRFIGLGNVYIAVFK  
DPLFWQALLKTVIWSAGVGFQFVFGFMLALLLNRRHFFGRGFFRSISLIPWVTPGVLIGL  
MWRWIFDGNYGVLNDLLSKLGLIENNIPFLAQQSTAFPAVILTIIWQGIPFFALMLLAGL  
QGIPEELYDAADV DGASLIQRFFMVTVP SLKNTIFITTMLRIIWVANSVDVIFNLTEGGP  
AYSTQTL SVYVFNKGNALNLGYASTMAILLALALSSVAIPYLKKLKFSQEEAL\*

>SPSA8\_v1\_550008|ID:41146130| ABC transporter, permease protein [Spirochaetes Bin 1 SA-8]  
MRNERMLRLQRVLRLLGNILLAALLVFLLPFYWTFVTSIKPEKELYASVVTYWP KAPT  
FTSYTRLFTEYNFLK PMLNSLLVAFFTTVISLTVSLLAAYAFSRYRFRGRKFFMTLFLTN  
NMFPTVLLL IPLFAIMRKAGILYTP TALILSYTTFTIPFSIWLLNGYLDLPRSLEEAM  
VDGANRAQAF LKII FPM L VPCIIATGAYVFMTA WNEYTF AV MFTNERNRTIPVALKNFIG  
QLGVEWGMLTAGGIITIPVCILFFFAQKRLVEGLTAGAVKG\*

>SPSA8\_v1\_550009|ID:41146131| putative transketolase N-terminal section [Spirochaetes Bin 1 SA-8]  
MNNGFLIEKADSLRRDIEMLYRCQSGHPGGSLSCVEILMALYYKTARVDPINPSWANRD  
RIVLSKGHGCPALYAILADKGGFPREDLWHLRQIDSHLQGH PDMKKT P GVDVSTGSLGQG  
VSVAAGLAMA AKYRKASYRVFAILGDGELQEGMVWEAAMSAAHYKLDNLIFILDHNLQI  
DGSNDTVMALGDIEXKFRAFGFNVASVNGHDIYSIANAIEQKQLDGKPLLIAETIKGKG  
VDFMENQAGWHGRPMNETEYLAALNVLKGYHG\*

>SPSA8\_v1\_550010|ID:41146132| putative transketolase C-terminal section [Spirochaetes Bin 1 SA-8]  
MAEKKSLRVA YGEALAE LGAINKNIVVLDADLSHATMTSIFAEA YPDRFFNFGLAEANMM  
AAAAGFAHSGLPFASTFALFGTGRAFEQIRNSICYPEENVKLGLSHSGLSVGEDGGSHQ  
SIEDIALMRVLPGMTILVPCDPLETKKAVYAAAEIKGPVYIRVARPAVETLTDVSSPFIP  
GKANILRKGDDVCIIAAGLMVQDALLAADRLAREGISACVVMHTIKPIDEALILEISAS  
IPAIVTVEEHSIIGGLGSAVAEVLAGRSHAKFARIGIMDKFGKSGKPADLFREYGLTADD  
ITKCCVDLLA\*

>SPSA8\_v1\_550011|ID:41146133| conserved protein of unknown function [Spirochaetes Bin 1 SA-8]  
MGIQSYEYRDAGLKR VYENEHWMIGIKNWK PANDVEGIDCLERHLM SDELFTLLEGE CIL  
LYCETSEKEPSASDLRTLKMEKGKVYNIPKGLWHNTITFKNTKLLL VESPDTGMSNSEII  
PLSSIHRKR VHAIATEM GKLESMQ\*

>SPSA8\_v1\_550012|ID:41146134| putative Oxidoreductase [Spirochaetes Bin 1 SA-8]  
MAKLRAGIIGLGKTGIKQLHALSLMHDVEIAAITSDPEKWK KLSERYEISSCYSDYRDM  
LRTADLDVVDCTPNYLHYEIDKAIINEGKHILSEKPLALFPSEAKELVSLARQKNV KTA  
VNFYIRHFPVIEQIRKYILDGKLGRIFSIHGAYLQDWLLENTDYDWRVESKFSGQSRALA  
DIGSHWFDIAQFLIMSQITEIAADFATFIPERIEQKHGLSVAVDTEYAGILFRMENG I H  
GTVTVQCQT CAGKHEGLSFEINGSEASMRWSYSDPFHAVLMKTGRPDTVITAKQDQYT GND  
APGQFAQNWLIADFYQSILGNTNHIYADFS DGYATT CII EAALKSMQSRAWTTVLR\*

>SPSA8\_v1\_550013|ID:41146135| protein of unknown function [Spirochaetes Bin 1 SA-8]  
MLGGTEQEYLGKIFIDTIVHPASRELILARRAKITSQHGMLEPIEAVLQKNNGSAMDVLI  
AAAWQEIDTDIINSTFFDISPIKARERLLKAVSTIASSASSQTS L DQLTNILLDAIQKA  
FPYAECAGYVHVTKSLDES DTIFGKMMATCELEPELEQFIWKA VQSDACKQNSAYLLTRP  
AQSGGDTYVFQPVRAENQLLGAIFLQYQRNKAPGADEQANLYTLAEAI VNAVQKVFLIQQ  
NESRYKNLAVLYRASIRLGELRSSSTEIARETLRILEQEKGWTHSVIRIRDEASKRLV TLS  
YCAPGVHSC EEEKVIEWLNTKISKPGDGLTGWVIDHDES VLCKDLPHDPRYLETDIGMLY  
GIYAPIHSEGV TIGSIGVESDRIDFSQADLELLCSLGD LIGMALNAIRTMDLLGYRVRWL  
EQLYQAGTAVTLEASEDMIFHQ LLEGAMDALS AEAGALMLYNAEKNLLIPVAKRGWLKDI

VDPIAPDKSLSGLVFSSGRSHISWELSQEPVVLISHIREKIPDDKRGVSVPILAESTVIGV  
 FHLGFSTDHINKDIVAVAELFASFACTVIKRVLSLELRNANNALRDAYDATLEGWSRA  
 IGLRDEDETASHGERVTSLAVAIGKQLDLSPMEMEALRRGALLHDIGKIGIPDRILLKQGS  
 LSAEERATMQTHPALAFQLLKIPITFLKEAVTIPYCHHERWDGSGYPQGLSGEAIPLLARI  
 FAIADVYDAMTSDRPYRKALSHDEAVVYIMSNNGKHFDPKVVR AFLALSRLR\*  
 >SPSA8\_v1\_550014|ID:41146136| protein of unknown function [Spirochaetes Bin 1 SA-8]  
 VLACDFCSPRQNFARSARGMNSIYENFAEILLGSTKHGQCXX  
 >SPSA8\_v1\_560001|ID:41146137| protein of unknown function [Spirochaetes Bin 1 SA-8]  
 MASGSKGTFRPVLVVFMAIALLTGAALGIGLGSTLNIIRNENFSEFTVALPSKLYDIKGR  
 LITEFYAEEKREPVPLKDLPPALIGAFLTREDQSFYSHHGFTIKGLTRAFFGKIIGKNLG  
 GGSTITQQLAGTLYADRRDISLRRKIVELWWALQLX  
 >SPSA8\_v1\_560002|ID:41146138|gapA| glyceraldehyde-3-phosphate dehydrogenase A [Spirochaetes Bin 1 SA-8]  
 MKVAINGFGRIGRLVFQSIVDQGLLGKDKIDVVA VVDVSTDAQYFAYQLKYDSVQGMKA  
 EISSRKS DPSKAEDDVLV VNGHEIACVMAEKELKNLPWAKLGVEYVIESTGLFTDEKAF  
 HLEAGAKKVIITAPAKSKAEDKKIPTFLVGVNHEKYDPAKYDVVSNASCTTNCLAPLVVY  
 LLKEGVGIETGLMTTIHSYTATQKVVDGVSKKDWRGGRAAANIIPSTTGAAKAVGEVLP  
 EIKGKLTGMSFRVPTPTVSVVDLTFRANRDTSEIEIDSLLKKASETYLKNILGVSTEELV  
 STDFIHDPRSSIYDSLATLQNNLPGEKRFFKVVS WYDNEWGYSNRVIDLLRYMDSKKQ\*  
 >SPSA8\_v1\_560003|ID:41146139|pgk| phosphoglycerate kinase [Spirochaetes Bin 1 SA-8]  
 MIKTXKDIELKGRVIMRVD FNVPMKDGKVQDDTRIMAALPTIKYVLDAGVRSVLMSHL  
 GDPDKDAKAKEKAEKEGKAFDLEKYLNGKHRMQPVAEYLS SKLGKPVIFLPSCCKGQKEA  
 IDALPDGAVAMLENTRFHKEETA KDIAVQEV LAKELASYGDVYVND AFGTAHRAHASTAT  
 ISKFSSVSVGGFLMEKEVAHLEPLL TSPPKPMVA VIGGAKVSSKIAVLESLLKTADALII  
 GGGMAYTFLKVQGIQVGKSMVENDFVDVASNLLAAAGKANVKIILPVDHVCAETFAPDAD  
 PVSIDSANIPENLMGLDVGPKTLELYRAALATARSV VVWNGPVG VFEFDAFAKGT EEIARM  
 VAAATGRGALTVVGGGDSVSAVNKFDLASQMSHVSTGGGASLEYLEGKILPGIACLEQK\*  
 >SPSA8\_v1\_560004|ID:41146140|cysK| cysteine synthase A, O-acetylserine sulfhydrylase A subunit [Spirochaetes Bin 1 SA-8]  
 MKVAKRVSDLIGNTPLVELSRLNSEG HARVLVKLEYFNPGHSIKDRIALS MLEAAEQQGF  
 LVPGMTIVEPTSGNTGIALAMIAASRGYRCILTMPETMSRERRLLLQAYGAELVLT DGKL  
 GMAGSIAKAREIAESDPSRYFIPMQFENTANPQAHFSGTGPEIYRDTDGLVDIFVTG VGT  
 GGTITGTGRFLKAQKPSVSIVA VEPDASPVLSSGGQKGP HGIQIGAGFVPEILDTSIYNE  
 IIRVKDEDALETARRAAREEGLLVGISSGATLWAGLELSRRPENRGKVIVLIAASYGERY  
 LSTQLFAQLAAGTLNSPENGRGENRA\*  
 >SPSA8\_v1\_560005|ID:41146141|cysE| Serine acetyltransferase [Spirochaetes Bin 1 SA-8]  
 VRNAHDYGFLLTEKKKSAMAEDIAAVLQRDPAARSALQVALVYSGLHALW MYRMAHRLWR  
 ANARFSARLLSQAARFLTGVEIHGASIGRRLFIDHGMGVVIGETA VIGDDVTIYHGVTL  
 GGTSLKGRHPTIGNRVTIGAGAKILGNINIGDDSRIGANAVVVKDTPPNSV VVGIPGQ  
 IVRRTRMHHEGDRPDLNHVELPDVVGKTLRELLNRVEELEEKVAGFHHVEKHAKIQHFDR  
 EGAWIDGDFVI\*  
 >SPSA8\_v1\_560006|ID:41146142|tpiA| Triosephosphate isomerase [Spirochaetes Bin 1 SA-8]  
 MRSYFIAGNWKMHKTAESVALASELREKLAGCKEKVMIAPAFTAL SEVSKVLAGSSILL  
 GAQNMGP EEGAHTGEVSVLMLKDLGVKVVILGHSERRHTYLETDELINKKVLLALKHEL  
 EVILCVGETLEEREAGRLEEVGTQIEKGLASVPAEKLPMVTIAYEPVWAIGTGKTATPE  
 DADAVHAYCRKVLAGMYGQEAARSMVIQYGGSVKPDNAATLMGMPNIDGALVGGASLKAE  
 TFVPIACFR\*  
 >SPSA8\_v1\_560007|ID:41146143| Preprotein translocase, SecG subunit [Spirochaetes Bin 1 SA-8]  
 MGFFAILLLVIFVIVSLLLIFLVIIQDESDSLGGIFAGGSGSAFGSRASN VVIKITYVL  
 GALFFISAFAMALINKTPTGSIPQTVTQQSTESGNAEWWKTQPAQTPETTETTAK\*  
 >SPSA8\_v1\_560008|ID:41146144| putative PTS IIA-like nitrogen-regulatory protein PtsN [Spirochaetes Bin 1 SA-8]  
 MILQKAFRPSTIRIGLESEDKDELFEELVDILARSYPQDKAFP REAVLQGIQQREKKMST  
 GIAKGVAVPHATISGLDGLHGVLGISRKGIDYEALDGE PVYLVFLLVSPPGDAELHLQAL  
 RQIALILQDHDLM TALLNSQSSEKAYEILTTC DILQFE\*  
 >SPSA8\_v1\_560009|ID:41146145| protein of unknown function [Spirochaetes Bin 1 SA-8]



MMGPHLALLYGKVKGATMDSLDSLERLLETEKKASRIIEEAETAARIRLEAQEKAAALE  
 QEKLEARRFFEAEAARIKKDIENEVQTELDTFKLHLRTIKIDKDRLAPLVWNIVRQDN\*  
 >SPSA8\_v1\_560010|ID:41146146| protein of unknown function [Spirochaetes Bin 1 SA-8]  
 MAGFADFSYIYARICGAYSHMRLYSKSSSLESVKSPSQLWKIWFDEEPPALPEYVLVSLA  
 EKKILKDSISKFRNLAEILPETDALVRSLLLKFEISTLKNLLLRIQKNEARPEVIDYQSP  
 VISSLLEFWPNLKAGLRGTDYAWIDETALSDIGKTENLLDRYYLKLWAAVQALPGGKTG  
 AIQDLLTREMLYQNAIWALRTYHYGLSREKTQTMLISIPQKDITSDALKIFDCTMENLT  
 SFADWPLKALLKNQSGKGLDIPLEITAQRELFLAVRRALHFFPETYTPLYCYFKLLDGE  
 VNLSVAMESVRLGVPLSESSQFIWALGGIPA\*

>SPSA8\_v1\_560011|ID:41146147| putative V-type ATPase 116 kDa subunit [Spirochaetes Bin 1 SA-8]  
 MSQVSMQRIEMILLKSDIDNLLHYLGKQACFQIIPDASEREKYSGVSKSDEEQTEAYLV  
 EHLEEAQRKLEEMGRMLGYVMPMQIKPDTHLPDEAMIGVIDERYAAVTHLEAEIQKQTSV  
 IAELEETVHEAKASTNLPLANENLERLSFITIKTGTIQPKMARLQETLGARAIIVPLDE  
 KGRIVAASSRKGRFALETELERAGFVKLDLPTGSQPVSSEAVDALEKTLKLRKAELSALA  
 VEKETAASFQDTWELFVLSIQLKRALLKVENRLEGTRWAYRLEGWVPANRTKGLIREVT  
 AMFKNVAIRLVAPDEKKGDETDIESIPVLLKQNAFTRAFQSIVLSYGTPLYGDIDPTPVV  
 AFFFTLLFAIMFGDLGQGLVIFLTGILFVRTKKASFEKYKRFPAFIAAGTGSMMLGMLLV  
 GSFFADDAILVPFEHMVTRVIFNRSSDRILDIMPQGNLDAMFRFFGFTLVGVGFINSTGL  
 VINMINLCRRKEYGEAIFSKTGLAGAFVFWWAIGIAVRIAAGGSLAWFDVPGLGIPLLAL  
 FLAESLKALLPSRDGHREKISLVDAAVGGMVEIITISYYASNTMSFLRVAAFALAHAVL  
 SFVVFTMAELIRTRAPGGSYAQIFVYIIGNIIIGLEGLIVTIQVIRLQYYEFFSKFFTR  
 SGKSFTPMSFEKVD\*

>SPSA8\_v1\_560012|ID:41146148| ATP synthase subunit C [Spirochaetes Bin 1 SA-8]  
 MKRKWMSGIFAFASAFAAQTAATAAPSAGASIAKYIGAALAVSVAAVAGGMAVAKIG  
 SAAMGAMAEPKELSGKALPYVGLAEGICLWGFLVALLILL\*

>SPSA8\_v1\_560013|ID:41146149| Vacuolar H<sup>+</sup>-transporting two-sector ATPase F subunit [Spirochaetes Bin 1 SA-8]  
 VIEIFVLAEEIIVLAFRMIAIEGLSVANKDEACRIFTAITHDKAAPGPKGGTFDLSQCKM  
 LIISEDVADMLGNGLTDWQLEGQFPLIVEIPPLSGHVEGHARLVDMVRQAIGIKIQ\*

>SPSA8\_v1\_560014|ID:41146150| protein of unknown function [Spirochaetes Bin 1 SA-8]  
 MEQIQGTEALEREILEDAAARKADKIKKKAEGDASRLAEAQSGIQKKIAVLQSEHEARIA  
 SLQNELHSRVPTESRLQSKFKESVLEAALEEFFEHEGSDLLGQWCLSQLEKSQKLIYAS  
 SADVFWKGLNAADQKKLEEFCKGSKSSLALHEDAGLPYRGVRVKPKDQSYECRFTERELR  
 DWLLDNKRGMLADALFGSNLNENPQENERAGKGIGADSMQDRA\*

>SPSA8\_v1\_560015|ID:41146151| V-type ATP synthase alpha chain 2 (fragment) [Spirochaetes Bin 1 SA-8]  
 MKKSGIITRISGPVLAQDLENAGLYDVVKVGGAGLIGEIIKLGDTATIYEDNTMMK  
 VGEVVCLEYPVSLGPGGLIGSIYDGIQRPLPVLKTLSGPMLVPGVAGESLDTEKRWHF  
 RPAIRPGEAIAPGKLFGTIQTESIQRHLIFDSNAKSENAAWVAEEGDYTVTELLKGES  
 GAQYSAKSQWPVRKPRQFLAKKVPQEPLVTGLRVIDVLFPIAKGGCAAVPGGFGTGKTMT  
 QHAIKWCDADIIVYIGCGERGNEMTDVLTEFPHLVDPRTGRSLMERTILIANTSNMPVA  
 AREVSIYTGITIAEYYRDMGYHVAVMADSTSRWAEALRELSGRLEEMPAEEGFAYLPSR  
 LAEFX

>SPSA8\_v1\_570001|ID:41146152| phosphate transporter subunit ; membrane component of ABC superfamily  
 (fragment) [Spirochaetes Bin 1 SA-8]  
 MAVTMLIGNSNFIPTSIFSPANTMASVIANEFAEATGITAASLIYVGLVFLVTTIVNVI  
 GTYVIKKVALEASKEVT\*

>SPSA8\_v1\_570002|ID:41146153|pstA| phosphate transporter subunit ; membrane component of ABC superfamily  
 [Spirochaetes Bin 1 SA-8]  
 MNDHTTGRMIKDKAFRIIVILLACFSILPLLLILYFITRNGIAVINWEFLTQLPRPIGEA  
 GGGIFNAIMGTGILIVLSSILSIPFGITAGIYLSEKTEGKIANIARLCVVVLQGTSPSIVI  
 GIVAYIWVVAPFQSFSALS GGVALSIMMLPVIKATEETLKLMPYHLKEASLALGVPPYYK  
 TILKVILPTGLSGILTGILLSVARITGETAPLLFTA FGNQFMNWNLFKPIDSLPYRIFY  
 AMSPYPEWHAFWAGASFILVVLVLA FNLIARGVAVKWKVQF\*

>SPSA8\_v1\_570003|ID:41146154|pstB| phosphate transporter subunit ; ATP-binding component of ABC superfamily  
 [Spirochaetes Bin 1 SA-8]

MESTVLKVHDFSA YFGDNQILKNINLETGSNLV TALMGPSGCGKTTLIRC VNRMHELIPG  
AKVAGKMYLKDNDIY AMEPIVLR RKIGMV FQKPNPFP MMSIYDNVIAGYK LNGIRLKKDE  
FDSIVERSLKG AALWDEVKDSLHRKGTFLSGGQQQLCIARALAMNPEILLFDEPTSALD  
PKSTAAIEELVELKKTVTMLLVTHNIAQAARVSDFTAFIYLGELVEFGPTEKMFTV PKD  
KRTEEYLTGKFG\*

>SPSA8\_v1\_570004|ID:41146155|phoU| Phosphate-specific transport system accessory protein PhoU homolog [Spirochaetes Bin 1 SA-8]

MLEEKMIGLRRELIECATHVEGMIDKSIAGLVRKESLLREVIEKDEPKANETEILIEDL  
CTTMIAQYEPKAKDLRILMTMKMNNDLERAGDHAVNIAESSLYIIERPAIKPLLDIPRM  
AEEAVGMLKDAIEAFIKEDALLAAMVCERDTIVDNLGQQILRELITFMSADPTTIERAMR  
LLNIARNLERIGDLSTNISEDVIFMVEGRVIKHHKDQEGV\*

>SPSA8\_v1\_570005|ID:41146156|glgP| fragment of glycogen phosphorylase (part 2) [Spirochaetes Bin 1 SA-8]

MEIIFEINRRFLDEARLVYPGDDERLRRLSLIDETDARYVRMANLATVGSHSVNGVAALH  
TKLLQKTVMKDFYELFPEKFNITNGVTPRRWILLSNPRMSQIITDAIGDGGWICNPQDTI  
RRIEFVDDVEFKNAWRKAKFYNKQELAGLIKKRIGINVNPESMFDIQVKRIHEYKRQHL  
NVLHVITQYNALKNNPKLDVPDRTVIFGGKAAPGYFMAKLIKLINSVADVNNNDPDIAG  
RLKVIFFPDFNVKNGQRIYPAADLSEQISTAGKEASGTGNMKFSMNGALTIGTLDGANVE  
IREEVQPENFFLFGTLVDEVLELKTRRYNPMEEYENNSKLREADLISSGFFSRGDKNLF  
KPLVDSLLYQDEYCVLADFQAYIECQQKVNEIFLDQDQWNRMSILNVARMGKFFSSDRSIS  
EYAQKIWKVNAVRAIKERE\*

>SPSA8\_v1\_570006|ID:41146157|glgP| fragment of glycogen phosphorylase (part 1) [Spirochaetes Bin 1 SA-8]

MREKSPKKELNVNETCGNVRTGLSAESIKRAIIDNLNFIQGRIPYLATPNDWYMALAYTV  
RDRMLERWIRSILVFRQSPRAVCYLSAEFLMGPHLANAMVNLGIYEQVREAVAQLNLNLE  
DIIAQEGEPGLGNGGLGRLAACFLDSLASLEIPAIGYGIRYEFGIFDQEIRDGWQCEVTD  
KWLAFGNPWEIARPEIAYVNLGGHTEHSYDEQGKYRVRWVPQRVVKGMAYDTPIPGYHV  
DTVNILRLWKSEACESFDFQAFNVGDYYGAVEEKIASETISKVLYPNDEPVKGGKQLRLAQ  
QYFFVSCSLQDMMRIHRLTGDAPDTINEKFAAQLNDTHPSIAVAELMRLLDENQVDWDR  
AWAITQKTFAYTNHTLLPEALEKWPLPLFW\*

>SPSA8\_v1\_570007|ID:41146158| Efflux transporter, RND family, MFP subunit (fragment) [Spirochaetes Bin 1 SA-8]

VEPRDTPVTFEYVAQTQSSQLVNIFSRVSGFLDKRVYTEGAIVRAGEVFLFMDKPKPFQVQ  
VDGYTAALARQKASFETARLNLERTKPLAEKKALSQKDLDDAIGKYETAAAAVEEAKAQL  
DSAKLNLSYCTITSPVTGVTSSAMQQEGTYINAPNSQLTTVAVLSPIWVNFSEISENDMSK  
LREEVRRKRLIPRGGGEAGSRSHSC\*

>SPSA8\_v1\_570008|ID:41146159| protein of unknown function [Spirochaetes Bin 1 SA-8]

MIVPQRSVQQGAKGHFVWVVTKEGTADYRPVTVGEWQENNWFISEGLSAGDQVVVDGSLT  
LRPGAQVKIKPLSAQPPVSVNQAGTKTSQTSSPKKDK\*

>SPSA8\_v1\_570009|ID:41146160| fragment of putative multidrug resistance protein mexB (Multidrug-efflux transporter mexB) (part 1) [Spirochaetes Bin 1 SA-8]

MFSKFFIERSIFATVISLIIVIAGLVAIKSLPVAMYPTITPVQIQVTATYPGADAKTVGD  
SVAAPIEAQINGVDNMLYMTSTSSNTGQMTVTVYFSLDTPDIAQVQV\*

>SPSA8\_v1\_570010|ID:41146161| fragment of putative multidrug resistance protein mexB (Multidrug-efflux transporter mexB) (part 2) [Spirochaetes Bin 1 SA-8]

VNLATPQLPDAVTKYGVSVQKKSSSVLMILAI FNKDGRYSPDYVNNYANVYVLD AIKRVE  
GAGQAQIFGMDTQAMRIWMNPDRMASLGITTS DVQSAVAKQNALFGAGQIQQPNDQGVQ  
LTFPVVTQPPFVTPAQYEDIILRASQDGS AIVHLKDVARAEVGRRAYVDDNRLNGIPATP  
IAIQQP GANGIEVSKAVRKTLEELKRTMPDGLF KIALDTTDFVKLSINEVYHTLFEAI  
LLVVLVVYFLQSRSTVICVVAIFVSLIGTFAGMLALGFSINMLTLFGIVLAIGMVVDD  
AIVVVENVERNMTKVGLHPKQATIKAMEEIGTSLIAVVLAMASVFIPAAFLPGTTGQLYK  
QFAITIVVSVALSGFVALTLTPAMCAIMLKHSTPPMRGFFGWFFRFFAWFNRGFDRFTIA  
FGDVVVLMIKRMVIAFAVLAILVWALVRLFRS IPTSFVPNEDQGYLMGMVIMPDAASLNR  
TVDTAKRIDELFAKDP AVDSRTMINGYSLIDGQFKPNVSTFFIALKDFEERYASTERARK  
ENAGAVLRSVHAESRNIETGLFIPIAPPAIPGIGTTGGFEFWLQDKGSGDPVRLFEVTQQ  
FLAKARARPELSGLSSTFRSSSQQLRAEVD RSKAVLLGVPVDDVYSALQAQFGSITVSQF  
NQYSRVWNVILQSDAQFRRAPTDIRLYTRSNKGQMVPLSALVTRYVTGPDLIPHNGF

PAAQVTGSAAPGFSSGEAIRIMEEVAREALPQGYSYAWSGMAYEEKKSGGTSAAAFIFGL  
IIVFLILAAQFESWTLPGSVMTAVPFGILGALVFNWIRGLDNDVYFQIGLLVLIGLGAKN  
AVLRVTFATELRKQGLSIMDATIKAGEERLRPIIMTSLAFILGVLPLAIATGAGANARHS  
IGTGIMGGMIGEATLAMLYVPLFFYLFDRLSERSARKKEKSISAETLSEPTLNPDTPGGI  
SPNAEGGH\*

>SPSA8\_v1\_570011|ID:41146162| Type I secretion outer membrane protein [Spirochaetes Bin 1 SA-8]  
MRKLIILTFVTLILAACAIGPDYRRPEISTPKAWRIEKEAVDVANTAWWKQFDDPALNE  
LIAVSLRENKDLKIAAARVEEYMGRYWVGRSQLFPQIYGSGSGGRQRSTERGSPSPVPSYV  
DNPYTIYQGVFSGSWEIDVWGRLRRLNEAARADLLSTEEGKRSVILTLVASVANSYISLR  
DLDKQLMVARQTAKSREDSYDLFKVRFEGGVISELELSQARSEYELAKSKIPSIEKFIVF  
QENALSLLLGRNPGPILRGKTIDELVLPSPAGLPSELLERRPDIRQAELDLIAANARMG  
AAKALFFPTISLTGIFGWSSTDLMSLFSGHSQTWNWAGTFTAPIFTGGSILGNYKATQAF  
REQALLRYEKAIQNAFREVDDALVDQKNTREQLLSQQRQVEALREYASIAARLRYENGYTS  
YIEVLDAERSLNFNAELSYTETQGFALFQALVNLYKAMGGGWILAADIAEHINK\*

>SPSA8\_v1\_570012|ID:41146163| putative Ion transport 2 domain protein [Spirochaetes Bin 1 SA-8]  
MKRLLPYLRRMWATDVALTMLLVLLIFIFLLFPMGQIGSVKFLTNLVFSFILITGAIAA  
AKNRILKRLVLLWSILAFVFIWVRHLFPHQAFVFATTSLSLAFLLLLAFLILGQAFREGP  
TTSHRIMGAVAVYLLLGLIWSLAYQLTALCVPNAFIMQTPFAAGDTQSLESHLFYFSFIS  
LTSIGFGDIVAVHPMARMMLVILEGVTGQLFPVILIARLVSLHVETKHKK\*

>SPSA8\_v1\_570013|ID:41146164| conserved protein of unknown function [Spirochaetes Bin 1 SA-8]  
LFLKEKINKGEVKMKKIITLLVGMIFLSISVAFAKGDFLGEYSKTLAPGPKGGAKLRWV  
KPGVDHTKYKKFIVDYVVFADDDSESKIINGDEMKKLGDACTLAIIDALKDKYPIMSEP  
GPDVIRLKFAIVDLKQSRPGVSAITSVIPVGLGLSIKKGATXX

>SPSA8\_v1\_580001|ID:41146165| membrane protein of unknown function [Spirochaetes Bin 1 SA-8]  
MDHKEIRLAVILSMDVPGLHFSGREEEEDACLIERCGETSVRDCATEFKGEVLQSIGDSFL  
LAFSNSLDAVRCARSIQRKFRSIDSENPAVALLPRIGIHLGEVFFVEHDAAGDTVTKASS  
LQAVAKPGFTCVSKEVWSLVESKLEPEPGFSCPLSPSRAKSLPKSQSPMQVFEIEFSV  
DDATETNSQNSGLNEKSDSSTRLETPIRSPRNISGFENASAGTAQNTSFNAGNQSSNLND  
SSPENIVSSIKAALLDDIRVSGRRLTVDEALTKYGYGIEAKEAIAQLADSGILIKNTRT  
EGQPTFNSTSDLGKSIEQAVHAIVHEIERSVREGDFKNQIKNSSVKKAVKQEIKNFSKMT  
DEQDRKRHRERRERKREVGTTFNFETYKNELAKKQEKLAKSIPGGIVSFVIVNSALFFFAL  
KNLNGFPWPVVFALFWLFGIINDVFSYFRVRKQNFVQALPDLDETETREIREIHKERDK  
IGKSFINLLTIPTILMLINLATRGRDPWFLIPSGIIA VSFLAQVGRYFSTIPTRTRKFFE  
KIGISGGKRGLKNASAQRMEESGIDLGEDYDALYRSAKDAAADIERSLRTHDAKEADEMK  
PQLNSYLNQVLMMLAKTTNEIDTIISEIPMENLARDKANLVAKLSDAEPTMRPEYEANIRE  
IEKQESSFKALNEQKEIMDLRLKASVNQLQQLKMEARTRAMDAETSALASSAIHSLRS  
KVELANYLEDLKGGMIEATQDPFDSLGSVSNLVLDGRQRDSTESPS\*

>SPSA8\_v1\_580002|ID:41146166| conserved protein of unknown function [Spirochaetes Bin 1 SA-8]  
MITIGSLVMYKSQLAIVTDSSDGRITETETREQKKVREKDVLLLHKGPLKQLPPSLTDQ  
TDFETAYEMLSADMGSERIPVDWAELAEVFGTANAETIAQCARFARQSPLFELKDEGL  
YIISPESVAKIREKASKKQREAEALRAKFAALGKAIKSHNAQEISEQAEFVPPFITELEAF  
AYGISSQSQIAREAGIAADQLAVHKALLDSGIWSAERNPWPQRAGCSLSPRLAFPETEH  
PTMKLPREDLTSLESFAIDNAWSQDPDDAISIDGKTLWIHIADPAAFVLPDSDLKEALS  
RGATLYLPEKIVPMFPEKAMPILGLGLAPESPALSFKLEINEAGNILNTDIIPSLVRVHR  
LSYEKADELINSHPALNALLQKSEIRHQRRLANGAVDIDFPEVSMKAGAEIRFLKIPQ  
TKSSSMVREMMLLAGEGIGFWAKAQNIPFVYASQDAPNISESMLKSNSNPSALSQYQRR  
RGMRASITGTEALSHRGLGLPLYSQVTSPLRRYQDLLAHYQIRAFLLAAKAGLPDADAMML  
REDEVARRCMLAAQASGQTRQAERDSRMHWVCVWLMKNPGWKGLATVMDAGNRDALVFLH  
DFGIELQMRTRRQLELDSTFFVRATRISIPNHDFTLLEAEPT\*

>SPSA8\_v1\_580003|ID:41146167| conserved protein of unknown function [Spirochaetes Bin 1 SA-8]  
MTALLVGIGLIVVAVLLVLPGIAGWWPDVLTFLKGSIPVLAIMIGAVAILIGVADIKDKR  
EAEKEEQEKAKEQAEEKK\*

>SPSA8\_v1\_580004|ID:41146168|rpIM| 50S ribosomal subunit protein L13 [Spirochaetes Bin 1 SA-8]  
MKTMFVTSATAERKWYLIDAEGKPLGRVA AKAASMLRGKNKPTYTPSQETGDFIVIINAA

KVAVTGRKRQEKMYYKHTGYVGGGLKDYTFRELIERDPVAPLELALKGMLPKGPLGRKLYK  
NAKIYAGADHPHAAQMPITIDL\*

>SPSA8\_v1\_580005|ID:41146169|rpsI| 30S ribosomal subunit protein S9 [Spirochaetes Bin 1 SA-8]  
MVRNLGIGTGRRKCSVARVFLREGTGKYL VNDIEVSKYFKIPELVMTATRPLAVTASENK  
FDLITVTGGGVNGQAGACSHGLARALA QIDPANQVSLRANGLLTRDPRMVERKKYQGRG  
ARRRFQFSKR\*

>SPSA8\_v1\_580006|ID:41146170| protein of unknown function [Spirochaetes Bin 1 SA-8]  
VRIESVHFETSGMAAIAMSGGFLFQIPLVRVHELALYGFLLSDSDSSAMGQEQAREALRK  
LPEIAGEFHEEDELFITISRIDEETRAFSKVSELGIAEQNSQGLYRKLQAKGFSRSAIQ  
KAIEKAQAEGLADNARFARIWARKRAEKTLCGPKTLLEASRGISAEDARLALLDIPFD  
MILEGAYMKTIRKLSKKYRGPELVQHAYRQLRLEGFDESLEKNLIDSEKNSL\*

>SPSA8\_v1\_580007|ID:41146171| putative PTS IIA-like nitrogen-regulatory protein PtsN [Spirochaetes Bin 1 SA-8]  
MDDDILTIEEVARYLRV SERTVYDWAQKGEIPSGKIGTVWRFKKSDIERWVNERLSSNRP  
AGLIGSIQLQNIISPDRILFLNYSKKRDALIALADNLSSAPQIKNKQELIAEILRREELM  
STAIGRGAIPHVRLSSVTDLVV SIGISSCDITDFQSLDDVPVRLLFMIAAAYNQHAYYL  
QTL SFFSARLKANELRDSLLSCKTPQEVYD LLIKQDE\*

>SPSA8\_v1\_580008|ID:41146172|smc| Chromosome partition protein Smc [Spirochaetes Bin 1 SA-8]  
VFLKSLEIYGFKSFADRTRIEFSDGISALLGPNCGKSNVVD AIKWVVGEQSAKSLRADS  
MEDIIFNGTETR KPLSVAEVTITISNEFGVLPDAPEVAIKRRLYRSGESEY YINGKLAK  
LKEVRELFWDTGIGKSAYSVM EQGKIDQILSSKPEERRYLFEEAAGITKHKVRVKEAEAK  
LERTENMRQVEGILAEVKRSHDSLKAQADKTIVFRDLKEKIFAAELDAYLLRLRQFVRD  
KDRKEADFTQKKAERDRLHEETEALTRSMSESLDLVNEMESRLVEMQKTL YGLAVEKNGK  
EKHKSMVADRLREVNAKIDQLEMRAKAVKEKIASLREEEEEKEAELADYRLRLKEAEKRI  
EEFESGIKAAALALKANDEDAKCRISISALEEAVRHDR TKLDEITEDIVEQLDIRLKET  
GYSSQAHKALEEEIAALADTLKARMAGKAVLVEDIRRARNFDAPNTEALISRLSSLEDL  
SESAKLADLIASKFAEYRATTPAFLDEF LSPEGIITKKRSIDTSIARNLEEIARLNARIA  
ELENDNRSLGEKIEAYRKTLEDARLAKARVQTQMTGAQDALAVFRREIAGQEAFLREQEA  
EIFSETRRKTEIGEELEQLQDELDEIEAKGK KLAGDMHQLEQTIETKNSDLVQRKKDASR  
LADRMQAIQNEMESIHLEIAQSETEIKNIRENFKELYSRDLSEFEDRMFEIRVPLSELRE  
RLAFFRNQLKDLGSVNLMAPEEYREVKERYDFLSAQMADLQKARNDLKLITDQIREESAE  
LFLQTYNKIKKNFHNMFRRMLGGGRAELRLSDPDHILESGIEILAQPPGKKLESISLLSG  
GEKSLTAISLLFATYMVKPSPCFLDEIDAALDEANV VSLVNMLREFSRTSQFIVITHNK  
KTVSGADTLLGVTMEESGVTKAIAVRLERHQAGEASV VIAQDDGFMEEDVVFETGRQLPP  
SAR\*

>SPSA8\_v1\_580009|ID:41146173| putative Threonyl/alanyl tRNA synthetase, SAD [Spirochaetes Bin 1 SA-8]  
MLQTEKKFYSHPELFADAATVLNVQKSAAGLEVILDKTIFYPEGGGQPCDKGSIQGCPCVV  
MVREAGKAIHVLAQAQSADFAAGDVVALQVEEARCDHMQQHSGQHLLSGILEKDMGIHT  
ISFHLGTEYCTIDVSTPSLSASQITEIERRSDFFIEREVPMLIH YCPPENPADFQLRKR  
PAEALNGEEVLRIVEIQNYDWSPCCGTHVSHLGQVRLRLILAAEKYKGNTRIYFAAGNRA  
VQHLRRQHETL KSLAGRLGTSVDEADERVAALLRKSSALES AKKLLVSQRARLEVSMAIQ  
EAAERGEQLKLLFLRSDDRDADEVLETV KAAQNASLDVIVFVPAKT VIAARSPDASWDV  
ASCAKPLLGEFEGKGGGSASLFRVFDGAKAEAYAAVLR ECAIGTEIQRISFNPSNSSR  
NSEFLL\*

>SPSA8\_v1\_580010|ID:41146174| alpha-glucosidase (fragment) [Spirochaetes Bin 1 SA-8]  
MPQVHSDVGGYTTLPKMARSKELFLRWLEMSAFSPVLR THEGNRPGANWQFDSDEETIVA  
VSRFSRIHANLKP YLFATAQEAARGMPFMRPLFYHYDGDGDFG DDEKAYLLGRDLAVYPV  
LKPNAKSRKLLPKDDW MYLWDGTGYGGGGAEVSA PLGTIPVFYRRNSEFRELFEGLKDI  
R\*

>SPSA8\_v1\_590001|ID:41146175|hyfB| HyfB [Spirochaetes Bin 1 SA-8]  
MKFFQQSGMRKRALRKIVGLLEFNLLPEGAAMAFYNAGILILLSGVVLVLFMKTSEGVS  
R LGRIMTLAGDAAVGIAAAAGMAGRYAGQSYVFFWRLPLGQALFSLRPLSSFFLLMLATVT  
ALAAVFAPSYLEHYHYSAGRMKYHWAFYLVLT VSMMLVVTAGNSVFFMLAWEAMSLSSFF  
LVMFEHQKPEAR KAGLVYFVFMHIGAVCLLVMFAILGKAAGSYDFAAMRSLGTNIAPGMK  
TAVFILSVFGFGMKAGIFPFYA WMPEAYRAAPADVSAVMSGVMKKTALWGLISILSLAGC

FEAWMGWTLLVSGLITGLLGIAFAAVQNNAKRLLAYSSGENXGIISMAAGIWILGASWGN  
SLLEALGFTAMLVHILNHALFKSLLFLGAGAMQSAVDTVDLDMGGLLKKMPKTGLAVIA  
GGIAICGLPPFNGFISEFLMYVSAFYAGTKSSLGNVIFIVAILGGVSMIGALAVFTFTKF  
IGTSLLGEPRTHEYAARAQEPAPGIYVPLYVLAGLTLFIGLFPQAVLLLLTPVFAEVLGISG  
FNTMADSIFPMLGIIQKVVLVSLVSIMILLFIVRNRLAKRTKAAAETWGCDFDRPSARMQ  
YTASSFAEPLTSFAGPLFSPEISEGVQTSLFPAPVVKKITVRDLLLLDRLIIPAYRWLAGI  
FEKFSVIQHGNTHL YXX

>SPSA8\_v1\_590002|ID:41146176| DNA-binding protein, excisionase family [Spirochaetes Bin 1 SA-8]  
MKLSVKEVARLNFNISEKTVYRWIQTDNLPHYRIGGQYRFSYSELLEWAAIHGTTVQSDLF  
AENGEQADSPVSIANAIELGGIHYRIEGSSKEDILRSVVSLVKLPDGVNRDIFLQFILAR  
ERLGTTAIGEGIAIPHVRNPVVFHSEHPQVSLFFLEKPVDFGALDGIPVSILFLIISPNI  
AGHLKLLSHLMFVLKNSEVLA VLKGSSTRNEILSAIRNAEASFAQNCRTAGIQPAS\*

>SPSA8\_v1\_590003|ID:41146177| exported protein of unknown function [Spirochaetes Bin 1 SA-8]  
MKYLKYVALALAMVLA VSCSPKLPQKDVDAANA VLADAQNAKADVYAPAEFQAANDAKAA  
LDAEIAAQEAKTSGKSYKQTTELAKALSDAAKAKDAAAANMETAKNDVATMLTDSQALL  
AKVKADAELAAKDAKKA AKAKLVKTIAEQVASYEAALAEAQAANDAQDYAGAKDKLTAL  
KDQMTATQASLEAAGFAAAN\*

>SPSA8\_v1\_590004|ID:41146178| GDSL-like protein [Spirochaetes Bin 1 SA-8]  
MYAREVFLFGDSIARGVMLDTNGSYKPFADCFA VRTADELGYQLINKARFGCTISKGLEI  
IKRSILGLGKALQDSDSKRLAFLEFGGNDCDFRWDEVA AHPQAEHLPNTPPELFRQLYRE  
SIDILRESGYTPVLLTLPLNAERYFDWFTRTGLNRAAILGWLGDVQFIYRWHEYSNSI  
WQIGEHERCVVLDIRSAFLKRRAYDKLLCLDGIHPNTAGHELIKHEILDYAKEV\*

>SPSA8\_v1\_590005|ID:41146179| conserved protein of unknown function [Spirochaetes Bin 1 SA-8]  
MEDSHEQAIAEYLDVLESMEAPDWDKLPDIGLYMDQVISYLTRLIKPFYALHEDHKITPS  
MINNYAKANVIPRAEGKKYSQEHLALLMIMTLKKSLSVQDIRTLLDEQAGEATHRDQYG  
RYQAVLDVAGKSVAAEIRTELAGLESANPADRIRASEKLRRELALKLSLEGSIRSLAAERI  
IDLLR\*

>SPSA8\_v1\_590006|ID:41146180| exported protein of unknown function [Spirochaetes Bin 1 SA-8]  
MKKAIFFIIVLLLATMAVSAAPSESGMPITVTVDGFLSISVPTFTTRNINAAEDTVLEP  
DGKCLKIISNLNNWYILVHSVNGGLVMHSAGMGPAYSLPYTIAISGLIDETKLDSDVESAS  
QSATALAGNEYNIKLRFGPSATFITAGDYSDTIVITLSVR\*

>SPSA8\_v1\_590007|ID:41146181| conserved membrane protein of unknown function [Spirochaetes Bin 1 SA-8]  
VTIPVVAKILVVFLLIVFATS RKIHLGLAAFAGGFFLVLCGIPVSAAWNGFIAEMLNPD  
LWMLVALLAAIMMFSAAAMKKAGGMEAFSSSVIALMPSRRLALAIAPMLIGTLMPGGAIL  
SAPLVGAMNEDGARSPETLSAANYWFRHTLELAWPLYPAFILTVSITGIRSSQLMLLNLY  
AVPTLFLGLMFIPLPHEQSKSGMTRKSSRS GEGHFASLSGLIPLAIVLAVYGLVSIFSDA  
LFSSFGLPAAVLALLNRYLPVFLGLAASSVYLLSKYRGRIFSGSLTASTVRLIGVVIGI  
RIFSALLNSANLASAAASELASAGIPAILVIAVLPFIAGLVTGVGFGYVGLSLXIVIGLI  
PTVAGLPYLAGIALAGGFGYAGMMLSPLHVCMVVTAEHFRIGLPATIRKFAAPLLVFTGV  
LLAYVWILTIVLQ\*

>SPSA8\_v1\_590008|ID:41146182| conserved protein of unknown function [Spirochaetes Bin 1 SA-8]  
MKSTQCLFTGTAFLLGAAVAEKEAVVIFVGDVVGPSGLRAVFAHLPAFAKKKKADIVIAN  
GENAQRGFGIGKEEIEALISSGVDVITSGNHVWERKDAEELIGSTSVLLRPANYPAPLPG  
RGYGVFKGRNHTWAVVNLQGRELDYPIDCPFKTADEIARVKREQPD AFIVIDFHAEAAE  
EKEALAWHVDGRACVLAGTHTHVQTADERILPLGTGYLTDLGMMSGPLDSVIGVKTDCIQ  
RSLTQIPIKMETSENEASVCGAVFTIDTATRCKMKIERFELK\*

>SPSA8\_v1\_590009|ID:41146183| rny| Ribonuclease Y [Spirochaetes Bin 1 SA-8]  
MSLKVWIFALPVAGLILGWMIRWLYARFQLTAAENEAEIRIQDAVKEAEAQKREILVEAK  
DQLIRERNQQEREMRERRIELQKLERRVIQKEENLDGKIEALERMEAQLKVKEKAIADRE  
AALLDQEERYRELERISGLTSEEAKRVIIQNMENEARHDAQLLINKIDQEAQLTAEKKT  
RDILVTTMQRIASDVTAETTVA VSLPSDEMKGRIIGREGRNIRTLETLTGVDVIIDTP  
EAVVISCFDPVRRRIARVSLERLIADGRIHPARIEEMVQKV TREISQKIYDEGEKVVFDL  
GLHNMAPDLIRALGRLHYRTSYGQNVLMHSKEVA VIAGLLAAELGLNREIAKRGALLHDI  
GKGIETDGDQNAEMGMDLVRKMGEDPRVINAIGSHHNDIEPSCPESILVQIADAISAAR

PGARRETLDNYIKRLENLETIAESFSGVDKAFAIQAGRELRLVNYENVTTDDQARELCKN  
IAKKIETDLRYPGRIKVTIIRETRIVEYAR\*

>SPSA8\_v1\_590010|ID:41146184|rbpB| putative RNA-binding protein RbpB [Spirochaetes Bin 1 SA-8]  
MSKKVYVGNMNYSTAENQLRDLFAQYGEVASVNIIVDRYTGKAKGFGFVEMNNDDEAQA  
IDALNGFEFMGRQLRVNEAEDKPRRDGGNFRPRRY\*

>SPSA8\_v1\_590011|ID:41146185| Ribosomal large subunit pseudouridine synthase D (fragment) [Spirochaetes Bin 1 SA-8]

VHRLDKDTSGVIIARNPEVHAFLAGQFRERTTRKEYFALTHGVPKELDGRIENYLARDK  
KNRKKFAAQKEGGKHALTIYRTVAVWEAEKGSKYALVQLFPKTGRTHQLRVHLAGMGCP  
VGDPLYGVKESFIPDATLMLHARRLKIRLPGEEAARVFKAPFPAHFLKAVRFLDARAKK\*

>SPSA8\_v1\_600001|ID:41146186| conserved membrane protein of unknown function [Spirochaetes Bin 1 SA-8]

VLSKTDPNVALDTSRWNLKPGAEGGIFGTDGLGRDIWARTWYGTRTSLLLGFVIALFDV  
GIGMIAGALWGYVKRIDRIMTELYNVLNIPQTVFLVLLAYIMRPGFWTIVVALCSTGWI  
SIARFVRNKVMSIRDAEYNIASRCLATPLPRIIQKNVLPYLVSILIMEAALTIPYSIGAE  
VFLGFIGLGLPVEAVSLGNLVNQGNFMFLYPYQLTWPTVFLAAITISFYIVGNRFADAS  
DPRNHV\*

>SPSA8\_v1\_600002|ID:41146187| fragment of putative dipeptide transporter (ABC superfamily, ATP\_bind) (part 1) [Spirochaetes Bin 1 SA-8]

MSGALLLSAEDLVVQFSLRGRKLTALRGASLELFEGETLAVVGESGSGKSVLAKTFLGML  
DKNGTITAGSIQYRGKDLARLSRERDWLEIRGKKIAMIFQDPMTALNPLKTIGEQUIREVI  
ELHRGMDRRQSKTETLKTLEAVGIQDPERRYRQYPHEFSGGMRQRVVIASAVACKPEILI  
CDEPTTALDVTVQAQILDLIKALKAEYAMSVLFITHDLGVVANVADRVAVMYAGQVVEQG  
TVDEIFTDPRAPYTWALLASLPQLGVKGEDLFAIKGTPPSLFKEIKGDAFAPRNPLALEV  
DFVAEPPIFDVSPTHWAKTWLLDPRAPAIRPPDSVLRRLREKLLAERKLS\*

>SPSA8\_v1\_600003|ID:41146188| fragment of putative dipeptide transporter (ABC superfamily, ATP\_bind) (part 2) [Spirochaetes Bin 1 SA-8]

MKQSPLLSVKNISVDFGSGRKKFRAVSNVDFDVEGETLSLVGESGSGKTTIGRAIMRVH  
PISEGEITYRGERISGDLTPKAERLVHQIQMIFQDPMASLNERAKIDYIVSEGLYSFHL  
FKDEAERVAKVEQALRDVGLLPEFATRFPHFSGGQRQRIGIARALVMEPELLVADEPIS  
ALDVSIRAQVINLLNKLKRNKSLTYLFIAHDLSVVRFISDRIAVIYRGHLVELAQSEDLF  
RKPLHPYTRALLTAVPTPDPQIEKLKIIIVYKPAERSPDEPAPSWIEAESGHFVLGTEKE  
VNSWLKL\*

>SPSA8\_v1\_600004|ID:41146189| putative xylanase/chitin deacetylase [Spirochaetes Bin 1 SA-8]

MKKFSMPLFALLVLLISGCATLHSGSSAQNQPLPDTANTAPSASSYLDPIRWWDVGVQD  
PTRELAETPDQLVLRVPKRADPKIVVLMYHNIVFGRTGGEYNRDLYNFEHDLVFLRNRT  
QIIGLDELPHYIQSGQKKLDTDAIITFDDGDLIYAIAAYPLLKKYNIKATFFIITDYVGT  
TGYVSWAQLKEMADYRNEKGEKLFNIGSHSLDHKRFDEIPAEQIPKELSESKFAIEKNIF  
SPVWYFALPFGAGSGRKEIETAKNFGYRGIRTSATGVMTPAAIDMYNIPAFYMTNERAD  
ILSQIYRLLGR\*

>SPSA8\_v1\_600005|ID:41146190| conserved protein of unknown function [Spirochaetes Bin 1 SA-8]

MPRPFCRRTIGLNPDDNVFMPIGIPGGLLEEITLSLDEAEALRLADLEGLYQEAARSMN  
VSRQTFGRIIESARKKTADAIINKKMLKIAGGIVQLKEQGEDTMKIAVPTRGDQIDNHFG  
HCEKYSIFEIEGNTIKAQSSLDAAEGCGCKSNIASTLAGMGVRLMIAGGIGEGAIRVLAS  
NGIKTIRGASGSVQKAVEDYLAGQLMDSGETCHTHGADHECSHTH\*

>SPSA8\_v1\_600006|ID:41146191| putative Auxin efflux carrier [Spirochaetes Bin 1 SA-8]

MARVILMITLPCGIFSGWAIKRFLTAPGRLAHEQRRDRDPIAVIPGILQKIALLGINPL  
AFASSIWALKLNASGAASLPFIGLGTLAGMLAGKIVSRLRLSRGRDVFSSISLSTNI  
GSIGSLIVFYVLGEQAFALVPFYKFFEEMWSFGVCFPMAARTGLALKSQDLPLQRTGTAQ  
SLLKIFRDPFILAAFVSIGAGLGLNASGLPRPEFLRQLNAAIVPLGSFLLLVSIGMKIPE  
QQSRLSKPVLLSYLSIRLLVLPAAASFLCALFGIASSPDQATALKVALTMAVMPAAFTSLI  
PPVLYDLDFPFSFSLWIASNLTLAGILPALWLLFH\*

>SPSA8\_v1\_600007|ID:41146192| protein of unknown function [Spirochaetes Bin 1 SA-8]

LAIRFYCGESARIAAVSLAYTRLLAAFFSFCIQDRIELYGTRYSDDYPTDLRYLLRLGD  
KAVSDGARQTC\*

>SPSA8\_v1\_600008|ID:41146193| exported protein of unknown function [Spirochaetes Bin 1 SA-8]  
MKKKNGFLLKLALVSALVLAMLVSCDVAGLSGTQNVSEDTAEARGLVKPEPKLDAAGNLL  
PQKIVGTAGIGADAFFFEFDVSGQAKFARAFVPVSESGFLVNGKIHRYKENYRLTTLDIL  
PLPDNSGATLMMGTTATVAGTSYSFQGVYSKETGFFGNIKKTVNGVVTGSEYDFFGGTPI  
FPRSDVENYIGYATFHFDSDTTALIFNAIDNKTKNIVGTWCETKPGMGNIHGTLGVRA  
GKAVSFNGEVLDMYKSIPGLYLDTMTADGAGEFTNPSEKTTITGSFTIHWIGYDWPSDFIA  
VKVQE\*

>SPSA8\_v1\_600009|ID:41146194| Glutamate racemase [Spirochaetes Bin 1 SA-8]  
MLKNDNPEIGILCWEAGQSPRGLVQLEALKGNSTNPDSYNFPIRFYRVKGANIHTILENP  
DKTVLARMIEAGKEMVQEGVKA VTTSCGFNAIFQKELSEGIGVPVHTSSLQVPLVQLML  
GSHRDVCIITAKKAALKPEHLAAASISRTENLHIYGLEHCPQWSRIFETPDEDLDVEAVR  
QEVVGVAMDALCEHPHIGAFVLECTDLPPFAEEIRAKSRLPVDFITLVQYVYSALPR\*

>SPSA8\_v1\_600010|ID:41146195| Saccharopine dehydrogenase [Spirochaetes Bin 1 SA-8]  
MSGRRVLLGYGMQGKACLIDLLNSAFFDEIVVADNVPDIAQTMSALRDARVRGVQVDAS  
DNGALSAVMKDASVVIPELLPGIFALPVARLA AKLGVNLVSAMYLANPGEQDPEKRRARE  
ELA AIDATMKEKGCTILEEFGMDPGIDLVLGRKALDDLDEVLA FHSYGAGFPEKGS DGNP  
IHYKFTWSIVGVMRSYLRPSVVIKDGKSV AIPADAMFIPSS THILDIPEMGGPLECFPNG  
DSSHFAEVFGIRNIVKNMGRYICRWPGHAAFWSVMAQCGLSDEPIQVGNAKIAPSVFCA  
ALLGSQSKFFYDEHEKDVALVRTDARGM KKGMPRRVIYQIIDKRDLATGLTAMQRTVGF  
ASIGARMILDGRITKRGIVSPSEVDFNSFMEELGKRGIFMTRQEMEW DGNLEP\*

>SPSA8\_v1\_600011|ID:41146196|ald| Alanine dehydrogenase [Spirochaetes Bin 1 SA-8]  
MVICIPREIKNNEYRCAAIPETVSELVQRGHSVLI ERGAGTGSSISD TDFAQAGAVLTDC  
QTVWESSELIYKVKEILPPEYRFLRKDLTILTYLH SNAHHEMTDELLKSGCIGIAYEDIT  
DAAGNFPLL RPMSEL AGKGGFFMACQFMQSINEGGGLMLTRISGVKTPEIL IIGAGNAGM  
GAAEMAASLGNRVTILDVSIERLESARNRLPSNVQLL YSNHDNLSSCLS QADVFN CILW  
PKTRKDHLITR TMLKVMKPSAMIVDVSCDEGGAVETCRATSHDNPIYREEEILHYCVDNI  
PSAFSRTATYSLANATLPYAREIADKGPV RALRENPHLRKGLTCFHGIL TLEETGLKQSR  
PYQRPEDIIELAR\*

>SPSA8\_v1\_600012|ID:41146197| Transporter, NhaC family (TC 2.A.35) (fragment) [Spirochaetes Bin 1 SA-8]  
MLAYELDSGSAPVCTIPLSAWAVYIAGLLKGYGPIVNAEIGMQTFIRSIPFNFYGIFAV  
ALAGLIA YQVIPNFGPMKKA EERALKEGKVIR DGATPLTGIEMDEITPAEGKKPNLFIYL  
FIPVLIVIGIALGTFLILHSTKTLEAFFAAVMYQAVALTIGGYFKNIKDFMDTATRGIKA  
VIPAILILALAYCINDISKALGAQKFIFEMSKSWMTSSMLPLAAFIAGAMISFFTGT SWG  
TYAILTPFVLPLAMQLSGNTVNTLVLASVGAIVSGGCFGDH CSPVSDTTCLSSFGAGSDH  
MDHVSTQIPYALTAGVVAAILFGVIGILAV\*

>SPSA8\_v1\_610001|ID:41146198| putative Periplasmic/7TM domain sensor diguanylate cyclase [Spirochaetes Bin 1 SA-8]

MQKIHAWKFTNAVFFDIIDSRMNKKT YFKSAWAVLIVALAAVLPIGAESSQSVSVIDLEK  
TGLMYFNADPSLGI EDVQKAEIQDRFAPIDGRPVWVGKRAPVAWIQFSLPERASAEAE GS  
PDRVQDTAALPVRWLLRVRPSFSIILDSVELYIPRKDGGFSRYVTGALNPESALELDSRY  
FLFSLPEDAYGRDCYLRFSNTDVLINLELLNPKAMTAKELTTFVYVYGLIFGILFAMAAY  
SVFMLVSLKDRSYLFYILFTISIGLWLFYVQGF SKALFGKVPFMDQAMLWLWAGMFITWG  
TVFSISFLKLKRG SFLSVMLVLAALGAVVSAAGLLGWNQIAFTLSHYLGLVAPVVILA  
ATVRLSRGFRPALSFLIAWFLALGGLVFSLMGLQILPVNFFTINALSIGAALESIMLGM  
ALAERFGQLESEKTELEKAQKKYRELSYTDAL TGFYNKLF LANYFENELAGHQQDSKDLA  
GILMDVDDLKAINDSFGHFAGDSMLLALAESVRTCVRGN DLVCRLNSDELVILLPAT TKE  
NAFRVAERIRIRFETDSLNVVNDKAIHCTV SIGVIQLQSGEDMGSFLARADKAMY EAKHR  
GKNCAVMM\*

>SPSA8\_v1\_610002|ID:41146199| putative AMP-dependent synthetase and ligase [Spirochaetes Bin 1 SA-8]

MQSALLGVPFKTAQLFPDR TAYKWRACKNSEETRSYAQLARSIRLFAAGFKAYGIQRGDHV  
GFFVNNRFEWIVSDFALMALGAVSIPRGS DTTAKEVAFIFHHSRHLIVETARQLAQLV  
ETFEPADWERCATIFVVEEGDESLIPEFLSAKTRFYSELLQKGEE EYAKDPELLEKLDRE  
IKDSDLTIVYTS GTTGNPKGVMLSHANFIQNLVANTPRLQIDINRAETT VVMLPSWHVY  
ERAFEYCGLASGLTFVYSNAGR FASDLLTEKPHLLISVPRVWESVYQKIIKAI AEMPGAK

RRLVLGLIKNNQAWMTSNHYLKGCYITLHERKLPEKAIAAVWHVLRWIALFPGHLLAGVLFKPFKEKVGRLRLATCGAGSLPKYLDEFFNAIGITLVNAYGMTECAPGILSRRVGYNTFGSTGIPFDNTEVEIRKEDGTRAAVGEKGVLFVRGPQVMSGYYKNPEATKAVLSDDGWLNTGD LAVQSENGEFIIVGRAKDTIVLMGGENVEPEPIEDKLKESVYIDHAVVLGQDQKQISAIVAVNEEELMKLAAELKLSMNEIVISGSNSIENDAIYNILLEEVNSRISKEHGFRPFERITKIFPILNDFSVGKELTQTLKVKRKYVEERFKHLVDKVLKGEEKGKK\*

>SPSA8\_v1\_610003|ID:41146200| Uncharacterized AIPM/Hcit synthase family transferase aq\_356 (fragment) [Spirochaetes Bin 1 SA-8]

MPYVGLRAFAHKAGMHADGILKTTSSFEHVEPKSVGNDRRFLMSEMGGRAAIAESIRKFEPLATKDHPAVKALSARLKELEAEGWQYEGADASFEILARREVGLYQPFRLERYEVQSRYPENKSSCASAWVKVSVNGTEEIAASEGNPVALDSALRKALQRFYPELARIRLTDYKVRVIDTMSATS AKVRVLIETTDGERVWTTIGVSTNII EASSLALADSIEFSLIQNSI\*

>SPSA8\_v1\_610004|ID:41146201| Uncharacterized AIPM/Hcit synthase family transferase TM\_0552 (fragment) [Spirochaetes Bin 1 SA-8]

MIEIFDTTLRDGAQGEGISFSLQDKLVIARTLDQLGVAYIEAGNPGSNPKDMEFFREASKLELKHARLCAFGATTRKGMSPGRDEGVKNLANAATSTVVLFGKSWDLHVQQVLQVSHEENLAMIAETVAFFKDLGKEVIYDAEHFFDGYRLSREYALASIAAAVEAGADCVVLCDTNGGSPFDLIMAGIQNV RQTHSIRVGIHAHNDAGMAVANS LMAVKSGAVQVQGTLVGFGERCCKT WHDLSSGTESLQSDRNRSEN RGNRQCTPPR\*

>SPSA8\_v1\_610005|ID:41146202| putative Branched-chain-amino-acid aminotransferase [Spirochaetes Bin 1 SA-8]

MSFESMVIPGSLEPAQLASLDWVGKIGFSLTVTPYMGGSVAGPDGAFEPCAVVKTGVLKVP PQACALNYGQAMFEGMKARIGVDGKIRLFRPEANAARMASGAARFMMPAPSTELFIETVTKVVKANRDYIPPYGKGS LYRPLLF GIGKTLQAPS DTTMFVVYTQPVGLYFKGMACITIKADDTYQRAAARGTG FVKAAGNYAPCFYPAEAKHEGFS DVL YLDHDGEHV EEVGSANFAMVKNGLTYVADSPSILRGITRDSVMRIAREILGIEVVFAPLELDRVLGLGAYAGQGP AEE AFCTGTAA AISPIGAMRWKDADYSFSGGAIGPITQKLFDTIDGIQTGRIPDPFGWTVVVD\*

>SPSA8\_v1\_610006|ID:41146203| ABC transporter related protein [Spirochaetes Bin 1 SA-8]

MNLLSLKDISLSLKSGLFESVTIDIDEADKIGLIGLNGSGKSSFLKLITGAAAPDHGEISLAKRFTYSFLPQKSEFSENTTLGDFLYLGDATEILHPAEEEEPRV SLENRYSALCKELNL PSPDTPMKFFSGGELKKAELARALAPSARLLILDEPTNHL DVDTIEWLEKKLQTSRQAILVTHDRWFLDAVVTRIAEIDRHTITMYPGYSRHLERKAVILAGLERAENKRLANLKIELAWLNRGARARATKSERRKQEIRAMSES LLEKPPSAYSFSSSETRLGKKVCVMTDVSFSYGTKQILKDFSFEFQGEKLAIVGPN GSGKTSLLKLISGMLTPDSGTIDL GATVQLSYFRQTNESLDGEKSILAFIQEHADHFKLADGSV L DAELLERFGYDRDFRNQKIKTL SGGEVRRLLMLVRILAESP NMLLLDEPTNDLDIETIERLEEYLED FGGTVILVSHDRLLVDKLAQNLLIFKGS GVMERYSGSYLEWSEHKERETSALLSAEKPKSKKPGAADDRDTQKTSVGRDKLSFKEKREFENLLNEIDALETEKRTLEESFANPKAFGPD MQSAHARYEEIEK LLEQKMARWEHLAEREG\*

>SPSA8\_v1\_610007|ID:41146204| Citrate transporter [Spirochaetes Bin 1 SA-8]

LQKKRRDCTAESVWSRNFFAWSIRMTLLVPVIAAVMYLGIILVPQKKS WFSLGAAFILIV TGIAPLREALLHYINWNILLIYL GSVLAELFIYSRVPAYLAEKIIDKSSTLGA AIVIIL LMTGFISAFVENVATV LVMAPIMLELSRKLK KSPAPFMIGLAVMANLQGTATLVGDPPSM IFANYAGYSFNDFFFTQ GKLSIFFFVQAGALAGALYFYAIFRN LDRERSVPEERIQSWIPTLLLLFMIVGLGVISGFSAGGIHLASGLLCAVLAIVGLVWLRC SMHESRDSVKKMLIGL DWDTMAFLAGIFIVIGSISATGALDEVARWLAGVIGGRIALGYV VIIAFSVVVS GFVDNVPYIVAMLPVAAGLAKTMQVKPEL FFMFLLIGSCMGGNLTPFGASANVVATGLS K KAGSKVSFISWLKLAGPFTLITTVVSALVTYAVWXX

>SPSA8\_v1\_620001|ID:41146205| protein of unknown function [Spirochaetes Bin 1 SA-8]

MKRCSLAVLVIGILFGSVIAIGAQEAVSGATKEWTIDSISAASKAFYYAKSSLTGEDLWK AIEARAGAVVVATANEDGTPNAAVIIPGISKDR TALIFGIAPNQTL ENL KARHVA VVTIY LYTASATDKFERNKGARIIAELTDQTEIARLAAENKDRGASAGSTFLKIVKILPLG\*

>SPSA8\_v1\_620002|ID:41146206| conserved membrane protein of unknown function [Spirochaetes Bin 1 SA-8]

MKKSVLVLLLAGVLSFATAEGIAGDPHASVGDLMVSAGANIGWGSFVG GGA EYIFARW



DIPGFAPLTFGGAAGVYFGSSIHIDLAALGTIHFGLKTFESLPDFLKNLDWYYGLGIG  
FGIGTSGGLGFSTGSGISYYLNDKLALNADYFYTDYFGSGAGSSSTLGVKLEL\*

>SPSA8\_v1\_620003|ID:41146207| putative Patatin [Spirochaetes Bin 1 SA-8]

MIFFSALFLLFAQTGNPNFDTVFPAFDAVGSILLPFEYGVDFGAARIEHVDRDMGREPIG  
LVLTGGSARAYAHIGVLRVLEQAGIVPDFIVANSMGAVVGMMLYAAGFSPDLIQKTIEQIP  
PERFMSLVLPGHGGFLNAGGFIATVSKIVDGDIDLKDTPIPLVVAEDLKTRRQVRFAEGD  
FARIMAASFAMPVVFEPALVNGHALVDGGSTNLVPVAIARDFSSRLIVSTTFYDRSMSYT  
NPLSILNRTFDIGKTRAGLQQIQDVNPFIRNDVEHFSFMEFSDPHAIIGAGEMSASAAL  
ADVRTYLIGLNSGLNGLDEALQVRRDYAGRVPGMIRELVFGALPTFEPTSRYKLRFKL  
SDAFGYSVMSLDDQSYFGLFLASAVGKIRFNAGMMAGLAGVAGHQWGAIAEFIANPADTF  
KFTSAARLWGDFAZYPTFFLQPKSAEIASLSWTSQTNLSVVPFVEGKAAVSLADGQVSW  
LARVGSKLSLISAKHLEFSAGLDFFDNDDGSSLRYPGEGMLTLGYAEPLLGAVRLHGAM  
RQDFSANGLSFSAGDAFRGTTPSGTAPTLAAAGLDLVWFAKSLEFAAGEVILVRNIEIGP  
YLDLAWKGFASDGYAPDAFAVGLNANLSVSLVGLAPFDVACYAAVSSSGTLMVGLRSER  
LHVRPAAIR\*

>SPSA8\_v1\_620004|ID:41146208| conserved membrane protein of unknown function [Spirochaetes Bin 1 SA-8]

MLSELALIFLLILLNGFFSLAEMALMASRKARLRSEAEKGDKAYKMALETAENPGRFLST  
IQVAITLIGILTGAIGGATISQSLTAWLASIPPLANAASALAVAIVVAATTTASVILGEL  
VPKNLALSKEVISAKLIRPMAIFSAIFYPLVKFLTIVITDAIVRLLGLKANREPEVTEEE  
VKVLIAQGTESGIFESSEKGMVEGVLELDDRRITSYMTPRTEVAALDLADPEISPLQFIM  
DHAQYAFLPAMEEDLDKIAGMIPVRPALAFLRDRNTDIHSILVPPVFIPETISALRALA  
ILRESKISTALIVDEYGGVSGLVTRGDLLGSVLSGIDEGASAEIPGVVKRSDGSFLVDGA  
LPIADFSDSLDELDTLFDLTDLYDTVAGLVLACMGSIKAGESCDWQNLHIEIMDMDGNRI  
DKVLVEKRDTEQSIDQPS\*

>SPSA8\_v1\_620005|ID:41146209| conserved protein of unknown function [Spirochaetes Bin 1 SA-8]

MDYLVKEIERFYKVIKLPFRTEGVAFDIFPMQYLPRIDGIDRVIHKSSAVSPGAVGDI  
ARPWYLHPHQEDNLLVLHGVRYVEIYTLHRRVENFTVEPERILHNGTVIFDGPALVWVP  
VNVFHRIVSGEQGSASLNFAVRHPGFDIATNFSIYDLNTETGEYRVIREGRDLQFAE\*

>SPSA8\_v1\_620006|ID:41146210|patB| Cystathionine beta-lyase PatB [Spirochaetes Bin 1 SA-8]

MREDFDNVPDRVPTSSLKWSYRKRFCGDDSVLPMWVXXMDFACPRAIVEAVRARADHPIY  
GYPVRTDGYYSLINWMKKRNGWDIKKEWICYSPGVVPAVNFCVLAYSQPGDKVIVQTPV  
YYPFSSAVLNNGRQLVENQLRLDGDHYVMDFEDLEQKIDARTRMIILCSPHNPVGRVWKQ  
EELERLVEICRRKGILISDEIHSDLIIGPTRHTCIAMLPGAADITVTLTAPNKTFNIAG  
LTTANAIISDKRLRDAFMTVAGNLGLGISNVFGIVAQEAAYTYGEPWLEELLEYLENYR  
TLTDFVAARLPELSVPLEGTYLAWLDCRKLGMNDAELKEFFLKKTKLWLDEGTMFGNGG  
SGFMRINIACPKQLL TEALTRIENAFIENRR\*

>SPSA8\_v1\_620007|ID:41146211| membrane protein of unknown function [Spirochaetes Bin 1 SA-8]

MLWFIFEGIPKVDVSRMQGFMANGFSNFLTALIMYMFALDGASVVINMGGEVKDPRKSIP  
VAIIWGTVIAAVIYALLAFIATTAVDYKQLIPPVTKRAMPLGEFAKKFMSFAGVFFISG  
GAFLAILTTLNAGIMVQSRIFWAASRDGIFPRWFAQLNKSGQPSRVTTITVALIHALPIIF  
KFDLSFTTLITLVPGFIFSMMPISVLFIEKKFPNL YKKSLLPLPKIWL YLIVAFSLGIS  
LLLSWNGLLKIGVKNLYYFAGFFGLGTVYYFIMTARMKKEGRIYRDIKHDDYDKYWIEEEA  
RLAQQNK\*

>SPSA8\_v1\_620008|ID:41146212| membrane protein of unknown function [Spirochaetes Bin 1 SA-8]

MAGTEGQDFKREITTAQLVWICVGAIGAGVFSLTGIGIAYVGSAAFLVYLVAIAAIAIVS  
TIPTMIAASACPTTGGYYKYISRFLDPTLGFYMWNRIGIFFFFFFFFKPCQSGHLLFLP  
YFSLRFSTCSM\*

>SPSA8\_v1\_620009|ID:41146213|yjgF| Enamine/imine deaminase [Spirochaetes Bin 1 SA-8]

MSKHCFNASNAPLAIGPYSHAVIAGDFVYLSGQAGLDPSSNQLVSGGIVPETRQVLTNLK  
AILTEMNLSLADVVKTSVFLKDMADFAAFNAVYAEFFPADCPARTTIQAAALPKNANVEI  
DLVAYK GK\*

>SPSA8\_v1\_620010|ID:41146214| conserved protein of unknown function [Spirochaetes Bin 1 SA-8]

MLNTDVAEITGSHRFSDTDRQLLARYELVAESVARIFGSGCEVVLHSLEDMAHSVIRIFN  
QVGTGRAPGSPITDLGLDVLKKSFETRNDIIGPYFSKTKAGKPLKSVTTLIRNDEGTPIG

FLCINFDLSMPLSHFLQEFSPSEAPQTGENFAPDVTDLVGHAVADELDAISRVTGVSPT  
EKNRRVVFNLEQRGVFEIKGSVELVAGELGVTKHTVYKYLREFRNQN\*

>SPSA8\_v1\_620011|ID:41146215|pdxT| Glutamine amidotransferase subunit PdxT [Spirochaetes Bin 1 SA-8]  
MKIGVLALQGDYEAHIKAIEAAAERA VPGRTASDGIVLFEVRSLODLNKADAMIIPGGES  
TVMGSLLRFGFLDAFRDRILSGMPVFGTCAGLILLSRQIEKFSQPGLGLVDVTIRRNAY  
GTQVDSFRAPLEVRFAEDGAERVETMEGVFIRAPKIVQTGPNVSVLASLAGDPVLRQGN  
ILGATFHPELVAGARIHDYFLGIVKKS\*

>SPSA8\_v1\_620012|ID:41146216| Pyridoxal biosynthesis lyase PdxS (fragment) [Spirochaetes Bin 1 SA-8]  
MSDPKMIKEIQDAVSIPVMAKCRIGHFVEARILEALGIDFIDSEVLTTPADDFHVFVKHD  
FKSPFVCGCRDLGEALRRIGEGAAMIRTKGEPGTGDVAEAVRHMRVAVRDGIARLTRLPEE  
ELMTAAKELGAPFELVYEVAKTGKLPVPNFSAGGIATPADAALMMQLGAEAVFVSGGIFK  
SGDPARRASAIVSAVVHYKDAKILAEISEDLEAMVIGLSELGENQKMAVRGW\*

>SPSA8\_v1\_630001|ID:41146217| exported protein of unknown function [Spirochaetes Bin 1 SA-8]  
MKKLIVLLLAFAMVGA VSAQVTTSIGLYGEVTVIDQAGQGVFTRYGNGYDTWTFKASDKD  
GKYGISLTDQNILDDGGFTVRDWNFWWKGQYTKVILGNLRNADFRMTVPYWAGATIFGGT  
DRITGYGVLIETLPKNGLTFGVNLPIGTAAANTVDILQNADLGVKYDVKGLGSFIALFNA  
DFVAPAANVLNLGAKITSVKNLTA VGIAQLKFDADTYKAALGFAYSGIENLSANLEAAYV  
YTAGVSTFSVWGQAYSVTDKLSATVGGSIANGGAYDVYANLGYDYGNGLSSEAGVGFDDG  
AFYGALKVYYYSVAF\*

>SPSA8\_v1\_630002|ID:41146218| exported protein of unknown function [Spirochaetes Bin 1 SA-8]  
MKTCKSPILITIFATAMLISACATNSKFNPNQPQVTMSQAVQAE LRQFGPNSDTNPYIE  
PRTLIRGKLNFEYIVRLALNLSSESQISILAEAKGPDGTETAKAMDMYAFEAYWDSVTYR  
EPDNDAKIQTRIANIKRSCIPSFSTASAGQGIYYIPFIGKNPMTRPSRIYVQVTVGNSE  
PIIYTADL\*

>SPSA8\_v1\_630003|ID:41146219| putative phosphoenolpyruvate-dependent sugar phosphotransferase system, eia 2  
[Spirochaetes Bin 1 SA-8]  
MNCQLLIKYLDSGDTYYGVRGKNPQDAIESLFSALIVPEGLDRNALKEAILDREAIMPTA  
IGDGFALPHPRKPLEDSGLMPIALAYCDSPVDWAALDDIRVSNFFLVVSTNQUEHLALL  
GELAELLRDKNFVKFLGEKPTKELLDYLVSENPLATR\*

>SPSA8\_v1\_630004|ID:41146220|rlmE| Ribosomal RNA large subunit methyltransferase E [Spirochaetes Bin 1 SA-8]  
MAGYDRPDFWTLKAKKEGYPARSVYKLEEIIRKFLLKLSGGASGPAVLDIGAAPGSWSL  
WILRQLKGVGSLTAVDIQDLGISPSDANFQFFKGSILDETMRKNLRDAGPYNLVVS DAAP  
STTGNRLVDQSRSEELVEAVMGLALEVLAPGGALIMKIFQGGEEKRLIASLKQNFQAARG  
FKPEACRAESFETYLVASGFSLTR\*

>SPSA8\_v1\_630005|ID:41146221|htpG| Chaperone protein HtpG [Spirochaetes Bin 1 SA-8]  
MSKYAFKTEVSQLLSLITHSLYSHKEIFLRELVSNASDAIDKLYLTISDEFKSIQFEP  
RITVFLDRDAKTLTVSDNGIGMNEEELADNLGTIARSGTKAFLEQLSDTDRRNSNLIGQF  
GVGFYSIFMVAEKA EVTSRKAGTSEAFMWSSSGQGEFSIEPSTRESFGTDVKLYLNEEGS  
EYL YRWSIESLLKKYSNHIA YPIYLVSNPKYDKDGKEQGKKLQEEQVNAASALWRRPKS  
ELQDKDYIEFYKSLTGDDKDPLLWIHTKAEGTIEYTSLLYIPSRVPADLYIPSHEQGIKL  
YVKRVFITDRELQILPPYFRFVKGVSDDDLPLNVSREMLQHNRVMMTIQQAALKKLFSE  
LEQLAAANPEKFKQFISLFNVQIKEGILSDWTNREPLLKLVRFKSTLADGWTS LADYKNR  
AGDSRKT VYYYISGDNEARLRASPLLEAFKEKNIEVLLGTDEIDELTFGGIGEYEGMQFKS  
VQLDAEEELGKKDESSPKDSEKAVAALKRVLGDRVKDVRLSRRLGKSPSCVVVDKDEFT  
PQYRKL MERLANEAI PETKPILEINASHPLVNRLSQLETRKELSSGDTEIVQELEDLAFV  
LYYEALLAEGEHFEVPHDFSERLNRLAKTE\*

>SPSA8\_v1\_630006|ID:41146222| putative Peptidase M23 [Spirochaetes Bin 1 SA-8]  
MKSMPYNILNFSRRMKAPGRGLTFFGSGWYSRKLERTVPEGLREYKKQEKLFLYRFAIAL  
KALWGKTAGL FVSLYSKGRQRLSLAVIPHSEKPARSVTL SRFALVFLLLLTGIVLVFSIA  
SAGRYALTA AQLAAVARERDDL RDTVDRLRDGVQTLASSALKFEREMTTLQDISKTNSAG  
TGSKPSGVTASSQSDALRTAGLSGLSIPDN PGLAGREIAQLEKISSFLDASVPDVERIS  
VLLAGQQDILTEIPNIWPVQGGIGHISMYFGQENPF SAGVWY LHNIGIDISTFRTGDVIL  
ASADGKVIDASYDPSLGN SITIQHSHGFLTRYGHLSIKVKKGQIVSQGQAIGTLGNTGI  
TTGPHLHYEVHLGTSVIDPLRFLNIRKAQAVRPAP\*

>SPSA8\_v1\_630007|ID:41146223| protein of unknown function [Spirochaetes Bin 1 SA-8]  
MARDSTPHLTECLLGAGSSVTGTVSGQGVRVEGDFEGSIQARNAVILAKGAKVKAGISA  
KDVFIAGEFSGTIEAAGTVRIAGGAVVA AEIQAKALELAAGASFDGHFRRMTT\*

>SPSA8\_v1\_630008|ID:41146224| Stage 0 sporulation protein YaaT (modular protein) [Spirochaetes Bin 1 SA-8]  
MTDSLGDGVIQEQEIDEISIELMEPEAFTSRTGGGGKPM AEDLPEPLYRIKLLHSNETFFAY  
FVPTGTGFPHFHSLEALERLMD DPTANKPDTAHKIAADAGEELVSEAEKEESARPGEMYI  
PDKSLAVAPTKY GKDLVEVQGRIMDTSLVNPDDLVMIERPASLDDIRKLRENLTKEYAY  
EQCRDRIWARNLPMKLVSAHYLLEESKILFYFTAETRVDFREL VKDLVSLFKIRIELRQI  
GVRDEARVCGGCGVCGRVLCCNGISDKLNPVSIKMAKDQNL SLNSLKISGPCGRLLCCLS  
YEYQFYKDARREL PQEGIKFIFENTQFRVVEVNALTSTVRMAGEDGRVLD MKAERFRYSE  
GRWKIIEA\*

>SPSA8\_v1\_630009|ID:41146225| Cytochrome C biogenesis protein [Spirochaetes Bin 1 SA-8]  
MIATIAFGLLIIAQILQSVSLFR TTA KDRISPWLALGSSILLITVIQRSIAIKFFALTN  
MYESLLFLAMLASLMAFAITRWKPTSESKALPYSLNILAIIFLALASSPIAPSTIRPPVP  
ALQSGWLVLHVSFTFIGEIFFAVGLVTAILQLTAKTEDNRKKFDRLTYTSAIGYPIFTA  
GALVFGAIWAENAWGRWWGWD PKETWALVTWLTYTAYLHFRLVRKNTSKLMPALVILGFA  
IAMFTFFGVNLLAGLH SYA\*

>SPSA8\_v1\_630010|ID:41146226| membrane protein of unknown function [Spirochaetes Bin 1 SA-8]  
MDSITDRIYSFLKSIKLA AFLLVLIGIFAIIGGIIPQGSLEFYLSHYPKIAKTIQGLGF  
DHIFTSLPFLALVALFTVNLT VCTVHRFGTELA KPREKRKHGPDLLHIGLIVIFGSILS  
ARTRTEEMFYLG TGQHLHLPDKMVLQIVALSEEKYDTGRVRSWTT EAIIRQPSPEPTHTD  
EPYSGGDTLGE EGFADQKLASSLPAMPAAASQTPAETQTAVSVPDGEKVTIKVNAPLRRK  
GYTVYQFNWKKTQVPVLVDKEGIIKELEPGDRIPTPDGFILFMAFEEAPAPQGAPVSPKA  
VFLVDSAGKRDLVKVQPGGNIHG YTFQRYDEHPISGLKVISDRWFPLILAGLVLALFGTA  
LTYIKKLKGLNV\*

>SPSA8\_v1\_630011|ID:41146227| Tat pathway signal sequence domain protein [Spirochaetes Bin 1 SA-8]  
MADLEKALEKQVSRRSFLKTTGIGLGVAAGALVLGTGVVGAQTTQAAGTVPEAALPYVEL  
DPEDARLRGHAAYWKAGCSFGGFY AIVSMLREKVGGPYNQIPLRMLGYGRGGVANWGTIC  
GALNGAAAANLVAPDADTNKLVSELVGWYTGFAFPSKEANAIGVAGGFKYDEKPYPKLE  
LVTSVSDSPLCHASN AKWIAKSGYLLPTNERKERCARLTGDVA AKTVELLNAWKAGKFVA  
TYKVDDQTASCLSCHAEDQEGKMACVSCHEPH\*

>SPSA8\_v1\_630012|ID:41146228| protein of unknown function [Spirochaetes Bin 1 SA-8]  
MAGETSIKEVIAFPKNSFAVSPMDQCPNEVDEKQLKEIHIRIVPKE\*

>SPSA8\_v1\_640001|ID:41146229| protein of unknown function [Spirochaetes Bin 1 SA-8]  
VTWFALGRTSQAFQMRGILIHGTHAICQMRANHQLNPIETKILGQALLGSGLSAALQKEP  
GTVMLRIDSTGCAEGMSAEGMKLDNSTIHARSRIFHDHLPEAVYALDSTDKIFLPGSMTL  
TRIEKNGRPVSGSVSLKTGNIAKDLAYYYLESEQIRTAVDIGLHFTPEGLAFGAGALLQ  
AMPGSDDRFIEQVETMLSGLPPLGLWFSQGGTRDNLMSIFKEAGFVRTAEGAFADFDCPC  
SWEKFLHEIISLDTATVDDIIANGPWPLKTTCHYCSSQYEYSKEAVESARKKIRSRS\*

>SPSA8\_v1\_640002|ID:41146230| PP-loop domain protein [Spirochaetes Bin 1 SA-8]  
MKNAETTLAKLIEIALRRYEMIKPGDRILVGVSGGKDSSCLVRDLAIKRSWWDVPFELAA  
CYIASDLHTEGFGPPPDDSWLKKQLETWDVPYIRIDVPVIGRLKPGESLNCYWCATQRRR  
ELSRYARANGYNKLALGHMEDILETLLNMNTRKGEFATMPPVMPYVNYPLTVIRPLALC  
EERQIIACAEELGFLSHTCTCGFNLTGARKTMRKQLEALTGGSSHAKRNLFKSM SAIKKD  
YLA\*

>SPSA8\_v1\_640003|ID:41146231| putative 2'-5' RNA ligase [Spirochaetes Bin 1 SA-8]  
MDRLFALCLPENLCRISTHIGQIKPALQHARPVWTGDATYHITLHFFGEVDEAAREFI  
RLQLAKEEFRHSRPLRSSGHLLFPNRVSPRVLGLSFRITPDDCLVPLVQQIRIARNAG  
AENEQRTWKPHLTIARLKNPVFINPQSLRPPLFEFEPETFNLVKSDLTPQGPRYTIIQR  
YRFF\*

>SPSA8\_v1\_640004|ID:41146232| protein of unknown function [Spirochaetes Bin 1 SA-8]  
MADKKLDEPKKAEKENKNSDLD PCTTSHSPESTRPTEEDACDEGVH\*

>SPSA8\_v1\_640005|ID:41146233|trpB| Tryptophan synthase beta chain 2 [Spirochaetes Bin 1 SA-8]  
MLTKAILSESDMPRQWYNLAAEFPGKMSPLGPDGKPVTPDQLAAVFP MNLIEQEMSADR

WIDIPQEVQAILRTWRPTPLVRAFNLERALKTPARIYYKYEGASPAGSHKPNTAVPQAYY  
NKIAGIKKLTETGAGQWGSALSFAQAQFLECKVFMVKSSYNQKPYRKFMQMOTWGGTCI  
PSPSDQTESGRQILREHPDSPGSLGIAISEAVEAAVTDTSQTRYALGSVLNHNHMLHQT  
VIGLEVRKQLAMFGEKNPDVIVACVGGGSNFAGLAFPFVKEKIEGADIDIVPVEPASCPSL  
TRGEYLYDLGDIAGMTPYLKMHTLGHTFIPSPMHAGGLRYHGMAPLVSLAAKEGLIRPVA  
VPQLECFKAAVTFARAEGIIVAPETSHAVAQVISEAEKAREEGREKTIVFGLSGHGLLDL  
QGYADYFAGKLVNFELVDELKESIQSIKTLPLQNA\*

>SPSA8\_v1\_640006|ID:41146234| putative Diacylglycerol kinase catalytic region [Spirochaetes Bin 1 SA-8]

MRPENLASGIKTILEHSPAFFKAKLIVDIIANPKAGGFKRRRFADKRKKELAALVAESLQ  
LPQRKSPVSVHLHLTERGGHAAAIVQRLDRSESNGTDLLHLIITAGGDGTSLETAERLT  
HLPEKEKNRFGILRLPLGTGNDGSEGRDLRTALGRFFKPVRFERRPAVRVVPALLEGKPP  
LYAFNIASVGLDAYVADMNRLKIMFPEDSYKFWLNVATLLYDKAYPLAPMKMRVWDMES  
RLVEDETSEKLFVALGSSGYRQYGSNKKILGPENAIAYVQTPLLRLRFIKGAIEHGQHE  
NLKELKHFSASRIELEYHEPILLQCDGETHSLANCDFPLTLELIPDLYNVVVPEI\*

>SPSA8\_v1\_640007|ID:41146235| Binding-protein-dependent transport systems inner membrane component

[Spirochaetes Bin 1 SA-8]

MRVSPARKIIFAIALVGIAPVLPFLWMLASSFKTQVDIVSWPPKLLFSPIIGNYIKVF  
AEQNFLKYFINSSIIGIAAVSFSLLLGLPAAYSIAARFKQKLSVFILIARLMPGISFLMP  
WYIIFSRHLMDSYVALVLSHMLIALPIVWIMTSYFETVPVEMEEESAMVDGATRQKAFM  
AAILPVSQPGIVTSITLSFIFSWNNFMFSQVLSMEKTKTLPIAVYNFVSYAEVDWGAVMA  
AAVAIMTPAIIITMVFQKYVVKGLTMGAVKG\*

>SPSA8\_v1\_640008|ID:41146236| Permease component of ABC-type sugar transporter [Spirochaetes Bin 1 SA-8]

MSKGGFVERNLKILFPLPAVTFVVVMMLFPVLYTLFLSFTNWNLTSGMPLNFVWFRSYLR  
VLKEPRFLSAIGRTFSFTAIALSAESLLGLALALLNREFKGGKPLMKLILLPLVATPVA  
IGIVWNLFFDPTIGLANFVLTQLGLPKSSWVSSAAVIPSALALVDIWQWTPMITLIVLAG  
LAALSQEPYESARVDGASNFQIFSHITLPMIAPTLTAMILRAIDALKTFDIIYAMTGGG  
PGYASET MNVMAFKYSFEYFRMGQASVILVFLFLLVLLSIVIMQVRKHFEL\*

>SPSA8\_v1\_640009|ID:41146237| Extracellular solute-binding protein family 1 [Spirochaetes Bin 1 SA-8]

MKNKLTALVLLAVVLGAGAQTKEIRVLLANHPYGDLLKTMPEYEKATGVKVNVESLQE  
SQLTTKLTTEFATNSSTADVFMTRPLQEGKMFYKNGWYEPLSSYDFSDFPANAMDVAKFG  
SKPYLVPLVTEWQVMYRDLFKKAGLAVPTTFEELEKTAKALHSADVAGFASRGKGGAAA  
VTQISSYIYNYGGLFLDKGKAVFDSKQALDAFRFYGKMLANYGPAGVTSMSWENIMPLFQ  
AGKVAMWTDASVFGQIVDPTKSQVPAENVGIANLPAGPNGSHPFIVVSWGMAIARQSKN  
KALALDFIKWATSKELAKKALISNITMARNSAWADPEVRAKVNPDILTQAFAAKNGFPY  
DRPYMSAVGNARDLIGEVIIESINTAGASAKLEQLAKQKVQAVNELLEDTGEYGVY\*

>SPSA8\_v1\_640010|ID:41146238| Transcriptional regulator, RpiR family [Spirochaetes Bin 1 SA-8]

MSENSCLYLIHSLMDSFSDKEQKVARYILNPNADSVHPSIDELAGSIGVSISTMVRVFRK  
LGYEGYQQFRIALATEALAPNLRFYEA PITENEDAIKIVFGAARTALDMTEKMLDRDAVK  
KIAKKA VQARSCYIFGLGGSNVVARDAFHKIIRSGIRCQTAEDYHLQLMLASQAGDKDVA  
LIISHTGANKDTLGIAEILKKQGCTIGVITTYPRSPARSADYLLLAGAPGAAIIEAFS  
ARIAHLAIIIDVLYVEVMELLKNKGIESVQKMRSIAIAGRRI\*

>SPSA8\_v1\_640011|ID:41146239|gnd| gluconate-6-phosphate dehydrogenase, decarboxylating [Spirochaetes Bin 1 SA-8]

MKADIGLIGLAVMGENLVLNMESKGFVAVYNRTTSKVDDFVTGRGKDKKILGAHSLSEL  
VSMLEKPRKVMVMKAGTAVDQTEQLVPLLEAGDIIIDGGNSNYQDTIRRTHDLEAKGL  
LFVGGVSGGEEGALHGPSLMPGGSEQAWPHIKPIFQAIAAKVEDGSPCCDWVGSAGH  
FVKMVHNGIEYGDMQLIAETFHIMRYRLGMSYDEMAAVFEDWNSGDLGSYLVEITRDILR  
YKDEDGSPLVEKILDTAGQKGTGKWAGIASLEFGVPLTLIAEAVYARLLSAAKDQRLAAA  
DILGEPDSAAFSGDKKLFVEKLGKALYAAKIISYTGQFLLKEAASNFGWNLNYGAIALM  
WRGGCIIRSIFLGKIKEAFDANPNLENLMFAPFFAEKLRASSDALRAAAAECALSGIATP  
ALFSALAYYDGMRTTRRLPANLLQAQRDYFGAHTYERTDRXX

>SPSA8\_v1\_650001|ID:41146240| Oxidoreductase, 2-nitropropane dioxygenase family (fragment) [Spirochaetes Bin 1 SA-8]

MVALSNFADMVRTAIEEKIDIIIFSGAGLPVNLPEFLQAVPGAKTKLVPIVSSGRAATLLA

KRWLDKYNYPDAFVVEGPKAGGHLGFKKEQIDDPAYALEKIVPEVIAAVAPFGEKHGRK  
IPVIAGGGIYTGADIRKFIELGADGVQMATRFVATEECDASDAFKNTYITAHEDDLQIIK  
SPVGMPPGRAIGNQFLADVEAGKKKPFACPYHCIVTCDVEHAPYCISLALLNAQKGNLDKG  
FAFAGANAWRCDRIVKVQELMDELQKEYEESADGVQD\*

>SPSA8\_v1\_650002|ID:41146241| Heavy metal transport/detoxification protein [Spirochaetes Bin 1 SA-8]  
MRKLLKIEGMSCGHCVMHVQSALEDVPGVKSAAKVDLLERSAMVEGENLDDQALRAAVADA  
GYKVVSIMP\*

>SPSA8\_v1\_650003|ID:41146242|copA| copper transporter [Spirochaetes Bin 1 SA-8]  
MITTKRFAIRGMTCSACVAANERATRKLPGVQLSQVNYATETLTIVYDDSIIVTAEAIQAA  
VKKAGYSAEEKQTLSHTSQTDSSHQKEKEQEIRQQWRKFGISALFAVPLFYLAMGHMLKLP  
LPAFLHPMKHPYLFAFIQLFLVIPVIIAGRQFYTVGFRSLVNRSPNMDSLAMGTSAAALV  
YSLYSMAMLLGGDLEAVNGLYFETVGMITLILLGKTLEAVTKGRTSESIKKLMQLQPST  
ATVVYGETHVEIPIEQVEPGDQILVRPGERIPVDGVILQGESAVDESMLTGESLPVDDKPP  
GDAVSGGTMNKNGALLFRAERVGAETTLARIIALVEEAQGSKAPVARLADQISGVFVPPV  
FVIALLTSLAWLISGQSIVFSLTIFVAILTIACPCALGLATPTAIMVGTGKGAEYGLLIK  
SGEALETAHKVTTVVFDKTGTLTEGKPSVTDIIPVQGTSADLLLSLAAGA EKASEHPLGL  
AIVSAAAQQLSIPLPETFSAIPGKGIIANFPDYEF CIGNESFMAEKGIGMGESFSEKAR  
ILSDNGKTPMFAAVNGSFAGILAVADTLKPEAASTIQTLRKMGI VVAMITGDNQRTANAI  
ARQAGIDTVLAEVLPQGKAGEVKKLQAQGQIVAMVGDGINDAPALAQADIGIAIGSGTDV  
AMESSDIVLMSG SIRDIPNAIHL SKAIRNVRQNLFWAFGYNVLGIPIAAGALYIFGGPL  
LSPVIAAAAAMSMSSVSVLTNALRLKRFKPLLANSNA\*

>SPSA8\_v1\_650004|ID:41146243| putative membrane protein [Spirochaetes Bin 1 SA-8]  
MAETANGQAPSAIKIGKKAFLFSAGIILALMIVSGILTLVLPAGEYQRVVQDGKTLVVDG  
TYQQIPRPAYPFWRWFTAPIEILFAPGNVALITIIIVFIVCVGGSISILEGAGVMEELVKI  
LVRFRRTQKYRLIALVIFFFMAVSSFIGVYEGMVPMIIFLVPLAISLGWDSL TGLGISLL  
PLAFGFASAVTNPFTIAVAQKIADLPLFSGAWLRIFFAVVYGLVTFVVIQHAKKVEKNP  
RLSPTFADDEILRQSLKDESTHAKAETDPIQEKQAALAKGKALIWFAVCVGIAMAI VLF  
TARIPGLSDLAFPVMALLFLVGGVGGGRIAGFSGKQIAKTFARGAGNLAPGIVLILMAYS  
VKHIILSGKIMDTILFGAASMIRQSSSIIAFLIYL TTLVMNFFIGSASAKAFLMMPLLT  
PLADLVGITRQTAVLAFDFDGDGFSNMIFPTNALLLIALSFTCVSYPRWMAWTWKLQVAIL  
VITAAFLAFAVAIGFGPF\*

>SPSA8\_v1\_650005|ID:41146244| MscS Mechanosensitive ion channel [Spirochaetes Bin 1 SA-8]  
MNGIQLPDSLQTFQSIGTTEFWWKAISTILTVAVILGVFRFLQMAVVRTASKKFP EAKV  
FLARKIVKYAGYSIAAAILLKA VGINITALLGAAGIAGIAIGFAAQTSVSNLISGIFLIS  
EKPFEMGDVIQTGDITGTVLSIDLLSIKIQTFDNRFVRIPNETIIKTNVINLTKFPIRRM  
DIRFQVSYNADIEKVIDTCAKIAQRNRYALDNPEPLILVDSFDNSGINILFGIWFERSQL  
VSLKNSIIIDIQRRFAEEQIEIPYKMDVYIKENGGMENG\*

>SPSA8\_v1\_650006|ID:41146245| conserved protein of unknown function [Spirochaetes Bin 1 SA-8]  
MWNYFSPEDLQWYSWELDGARAWLRKNGEEWRLALEGIDFRAIQPGAKGPIPAVPSLELP  
IFFSVGKGTKIALRPQLAHRPYVIAVRNDVRLLPGAEAQFDIALPPLL RFELEGGKV LLE  
AEPFTVPNTWFGDKTSGNLCHSLPMSLDPRCAGEKQAPADSAAPGTHNAERYLACRSLVQ  
CRLVIRNQSKESIDLRLAIFTDLINIYQKGEFMVTDSVVIVANQDGELQTRIEKEKSRG  
LTVLQAARSSGISEILVRRGV SFLKRIAGLEPV\*

>SPSA8\_v1\_650007|ID:41146246| Ferredoxin-dependent glutamate synthase 1 (fragment) [Spirochaetes Bin 1 SA-8]  
MLTAKQEAVSAMGTRPPAILSAGPIHLFA YFRQLFAQVTNPPIDPYRETLVMSLENYIG  
KQRNLEETPEHSRQLRLVRPILSNEDIKKLQAANLEEFK VETVSLCFAATAANTDKADF  
ETMLNDALQNICREAESKIDAGANLILLSDRDISETMTAIP SLLGVS AVHTHLVD AKKRH  
LAGLIETGEAREIHDI AVLLAYGASGVN PVMVFDLLPTFSSLPEFSAVSAETMADNYIE  
AVNKGILKIMSKLGISTVSSYRGSRLFEATGLSANLVQRYFRGTESRIGGIGLSEIAFDR  
IQAHRDAVDLSGRMPCTEILTRSPAGRDVPWPFS LA AHLTKAVRTE DASA WRAYADGMDS  
PERQPFALRDLFSFKPAQPVPRA SVEPAETIIRRF SVAAMSIG AISPEAHEALS RGANSA  
GSWSNSGEGGEDFNRNDAAL T ASRQIASGRFGVTARYAATCRELQIKIAQGAKPGE GGQL  
PGTKVTA YIAELRHAIPGKTLISPPP HHD IYSIEDLSQLIYDLRCVNPSARIAVKLGAQA  
GIGTVAAGVAKAGADCVVVSSGDGGTGAAPLSSLDHAGNYWETALPEIRQVLAMNGFDLS

VVVQVDGRLRTARDIVIAAILGAREFAFGTAALIAMGCIACGKCNLGKCPVGIATQDPAL  
RARFKGSPEHLVRRFRFIAEDVRSLLAELGVHTLDELGRYELLDHFHGRAGTPYARLTDF  
STIISSLEIARRYPLADEAEMEGFGPPALPLPEAGLRNFKPEKRKEAPVSDVESSFLSRA  
IEACKHGQPFIAQVSRNSDRSVGAALSGELARQGLGLSPDSIKVDFYGSAGQSFGAFLA  
SGITFMLEGEANDYLGKSLSGGTIIVRPERNAKFEPEEQIAGNVCLYGATAGSVFINGR  
AGERFCVRNSGALAVVEGTGNHACEYMTDGVVVVLGKTGVNFGAGMTGGIAYVYDEDQLF  
DTRCNLSVDLSIIGNRDDQDRLHTILESHHALSGSPKAARLLASWERVVPLFLKVTCAA  
PV\*

>SPSA8\_v1\_660001|ID:41146247| ABC transporter substrate binding protein (fragment) [Spirochaetes Bin 1 SA-8]  
LLSIAPRIDGLYLGNDNTVFSALNAVAETALEKNLPVVTADPSSAESIPVLAAGYDYK  
VGTATGKIVRILNGEKTADIPVYLPTESSDLLMVLNLDAKKLKLTVPAEIVEKAAVVI  
KDGSLVRK\*

>SPSA8\_v1\_660002|ID:41146248| ABC-type transporter, integral membrane subunit [Spirochaetes Bin 1 SA-8]  
MIEGILVEGLIYGILALGVFISFRILDFPDLTVEGSFPAGAAGGAMTALMLGPKFGAGGS  
LFLVVCILCAGLIAGGLAGFATAEIIYHRLKVHPLLAGIITMTGFYSINLRILGGKPNLPL  
IAGNPLLDARSLLNGMLSPEFSLAASMLAVLVLFGLDFFFHTEVGIAMGALGDNENS  
VIQAGINPVRLRTLGIILANALTGLAGAIASQGFADVNFQGVVASGLATVMLGELVI  
RSQYIGVQLARVFIGSILFKALMYAARSWGYLGITPNDLRLITALLIIGSIALSKMGRK  
SS\*

>SPSA8\_v1\_660003|ID:41146249| Phosphonate-transporting ATPase [Spirochaetes Bin 1 SA-8]  
MIEIESARVSFSLGAGEEHVVLKNLSLSVKAGQTVSIIGSNGAGKSTFLNAIAGTVPLRS  
GVIRIDGVDCTRQAEWERARYVGRVRQNPLAGTAGDMTILDNLALASRKGPRRLKIATPP  
AIARRMAEEVAQLEMGLSRLHENVSRISGGQRQALTLMAVLSKPSVLLLDEHTAALDP  
ANAEKVSALTKHFIEFGLTALIVTHDMSRALSEADRIVMMHDGEIADLSGKEKASMTV  
AGLVDLFRKARGRDYAEDRDLLR\*

>SPSA8\_v1\_660004|ID:41146250| conserved exported protein of unknown function [Spirochaetes Bin 1 SA-8]  
MKKSILALLVLLAVSGPSAQTSAADIAALLASAGSGNASAQNSLGVKYYNGDGVKQDYK  
EAFNWFYKSALQGNMVAQSNLAYLYDSGKGVTKDFNSAAYWYRKSAAEQGYATSQKNLALM  
YENGEVGPQSYEDAAYWYQKAADQGNATAINNLGVLYENGRGVTKNVDKAFELYAKAANL  
GNSYAQNNLGWFYESGMGTPKDILKAFEWYKKSASQQNPYQYNLGWLYEHGDTGIPVDK  
DSAFIWKRAAEQGHDAQYQLAGMYERGEQTQKDYDEAFYWFQESAYNGYADAMVAVGE  
YYEFLAGDIDYVQALAWYLIAAQYGHDDAGYYAELVKETYELTDEEIAEAERLASEF\*

>SPSA8\_v1\_660005|ID:41146251| Peptidase U32 [Spirochaetes Bin 1 SA-8]  
MELLSPAGSIEKLRAYRYGADAAIYGLPLFSLRAKAENIDDTDEGAPEKIARVKSFFSL  
ERQRKLYCAVNIVFHDDDLRKLESALPRIAIEYDFDGFIVSDTGAYDILREAFPDKFHL  
TQADCTNWRAARHYLRMGFSRIVPGRELSLDEIKTIKDHVPELEIEAFVHGAMCMAYSGR  
CFISSWLTGRSANQGDCAHSCRWHYKVYIEEERKGRLLIPVETGETAHGGYTLIMSSRDL  
NMVDHLLDRLRAGVDSIKIEGRMKSLEYVALTTRAYRFALDHPSIDNPFKQDLEAVSHRE  
FDTGFYYSRNGMDTSTLSYQQSHLFIGSVEPFTSSFLINSLGEEILVAELFARFSSHEW  
TAPVFMDLKNTVSLAAPLELLGPEGEFFSLAPSDYRFFDIDGNIPKANHGKIWFFQARR  
AACPADIQWLRLKQASRQ\*

>SPSA8\_v1\_660006|ID:41146252| conserved membrane protein of unknown function [Spirochaetes Bin 1 SA-8]  
MNIIPSAFYNSGWKIVSLIFVLAIALGGYFIPILGLAVPLLIAIALIMNARKTRSFCSGF  
CPNGRALSFTMKTVSRNKVLPYLYSTEFRRMLCGFMMFCIISLLARS DGSVQQIGRVFW  
AIYIASIGISTISGLLKFPRSWCAYCPMGTQLQDTMKNPPHRIKSSSRPSPMPQ\*

>SPSA8\_v1\_660007|ID:41146253| putative Polyamine-transporting ATPase [Spirochaetes Bin 1 SA-8]  
MHLIELHSVNFQYENSAQPALQNISLSVDEGEYLALVGNNGSGKSTLVRLFNGLRLASSG  
TVLAAGKNPAERANLQCIRRTITIVFQSPTDQIVSSCVEEDVAFGPSNLGLSQAIEDVRV  
QMALQAVGLLEHAKRPTFLSGGQQKLAAGALAMQPRCIIFDEATSMLDPKTRASVLS  
LMKELSEQIAIIVHVDHMDDEATQAGRIIALDKGRLVYDYGKPEGFFTAGERPQSLSLAES  
LGLLEPSVLKLARSWGLTLPLNASYQDMAKQLVAAAGQGKTGISVSSANGGSSLSQKSPQ  
PRNDVLFQIEAIRYNNVRFYSYLSGTTNEVMALKDVSFLIPKGTMIAFVGMTGSGKSTA  
LQLANALLKPVSGDVLIFGRNTREKSVDLKALRMNAPFSIQRPESALFEAHAADDVAFGP  
RNQGLKGPALVRRVETWMNRAGLPFIEFRDRLIKTSLSGGEKRKLALAGVFALESDTLLLD

EPGAALDPGSRASVFSLLEQLHEQGKTILFATHSMDEAIRADLVAVFKDGLMAFGPPRD  
VFYRDYEESWGIDRPRIVQFAMALEAEGANLPYYPVSAEEALSLFEAGRLP\*

>SPSA8\_v1\_660008|ID:41146254| putative Energy-coupling factor transporter transmembrane protein Ecft [Spirochaetes Bin 1 SA-8]

MKNLEFFRNISIGQYIDSHSLFHGLRPATKYLLLLGLMMLLAIAAPTLAGAGFAFFAALVL  
AQFSKVPLSFLLRSLKPIFPVILSFMLQFLFRWPGDSSITLISLGFSLTVRELWVAM  
ILIRAAAMMTIVGWFTSITTEAEAAGKIEDIARPISSKTLPIHRLALAVAAAIRFIPIIA  
GELEEIVKAQASRGADFGQDTKGLLAKARAYLPLFVPVTIRALERAEMLAEMEARECYTG  
EGQTVAPKTPMKRSEVLIRFSVPIIVIGVLVVDVYFISTWIRPY\*

>SPSA8\_v1\_660009|ID:41146255| conserved membrane protein of unknown function [Spirochaetes Bin 1 SA-8]

MDTQKKASSAASNSWMRKTMTVTGALSASVIALFLTPFGYIPWLAGASLTMHVPAIILGGV  
LEGPVGAIVGGIFGVTSLIKAATAPQGPIDVFFTNPLVSVVPRMLVGFFAWLFYKLLAK  
WNIHAASIAAGIGGSIVNSVLVLGALVLFGAIPAVAGSVFVANSLEAVLAAVLTGLVI  
TAWKGIGNRSKAKLADEE\*

>SPSA8\_v1\_660010|ID:41146256| putative Type III pantothenate kinase [Spirochaetes Bin 1 SA-8]

MIVVVDIRNKVVTVGIIQQDDVTAAMSEAAPEPLKWRSSIRRYGAFHERTSDEFSQLISQM  
VAELVPDSAEAHGFVSQESGSKAPEPVVWISSVVPALTGVLAASTEAVFKVTPHVVGPGT  
RTGIKIRTDFPSELGTDLVCAAAGARRLTSRPLCLIVDFGVALTISAVNARGEFLGAITA  
GPRIAAESLRQETAQLVEANLEFPASAIGKSTRHSICSGIMIGYTGLVRQLLLEMGRELR  
ADEIKSGLLEMPGTDTDLSLSEIEX

>SPSA8\_v1\_670001|ID:41146257| protein of unknown function [Spirochaetes Bin 1 SA-8]

VNDHLILCPFVVLIRGRSIDASIVSVAHPVNLVDYIPSLDAETAAQSSIRFLTQQAPEE  
FMTSSLDDRAREMFESKIRLNAPEWILGATPDFSFSISTAMSAAEFRVSAGKIAAITMR  
QADSNPYFHRIIESELYKFFGRQFSFGLLDEMKAACMDLYQKK\*

>SPSA8\_v1\_670002|ID:41146258| Pyridoxamine 5'-phosphate oxidase-related FMN-binding protein [Spirochaetes Bin 1 SA-8]

MAIHELLEQLKTLVSEVGIGILTTIDEEGRPYSRWMTVPVFIPRLPGSLYAVTSRSFKKAD  
HIEKNPNVSWIFQSRSLDRIGTIQGKAEIIRDPSLSAEVIEAIGPHLTVFWKYSGDPSKL  
VVVETRLERVSMFTPLGKGVETAEVADE\*

>SPSA8\_v1\_670003|ID:41146259|pdhA| Pyruvate dehydrogenase E1 component subunit alpha [Spirochaetes Bin 1 SA-8]

MSKIALNDYPKDAWLDMLKTMQLIRTFEEKAGQMYGLRKIGGFCHLYTGQEA VATGMISA  
LDLEKDYVLTA YRDHGHALACGIDPKAAMAELFGKVTGVSRGKGGSMHFFDAKRHFLGGN  
GIVGAQIPVATGVAYAQR YQKTGGVTL CFFGDGAFHQGALHESFNLARIWNLPIVYVVEN  
NQWGMGTNWKKVSANPDFAETAKAYSMKGYVCDGLDILDVYHVAREAVAGARNGEPAFIE  
ASTYRYKGHMSDPQKYRTREEVDAYKQRDAILLKSRLEAANMLNQEEWDTIVALCETQ  
VDESVEFAEKSPPEPAPGELFTDIFA\*

>SPSA8\_v1\_670004|ID:41146260|pdhB| Pyruvate dehydrogenase E1 component subunit beta [Spirochaetes Bin 1 SA-8]

MSELYREALN RAMDEEMARDGNVFIIGEEVGEYD GAYKVSKGLLAKYGP ERV RDTPIAE  
LGFTGLGVGAAIAGLRPVVEWMTHNFALLALDQV VNNAAKMRQMSGGQLKVPVFRGPNG  
PAEYLAAQHSQSFAAYWAHV PGLKV VAPATPADAYGLLKS AIRDDNPVVVLEAEMMYSWK  
GEVPDHEYL VPIGKANVVREGSDLTLITFSKPLRV TLESAEMLAQKGIQAEVIDLRSIRP  
LDEETLYASVRKTGR CIVIDEAWPMASV GSHVAWLISKNCFDTLDAQVELVSGEDVPMPY  
NHNLELLAQPSARKIIDA AKKVL YREDL\*

>SPSA8\_v1\_670005|ID:41146261| Pyruvate/2-oxoglutarate dehydrogenase complex, dihydrolipoamide acyltransferase component [Spirochaetes Bin 1 SA-8]

MAEIIYMTALSPTMTEGTIARWKKSEGDSFASGDLLEVEDKASMDYEAPKSASLLKIL  
LPAGGKAKVGDPIGIIGKKGEDTAGL MASLAEKSQPSVPDTPSTQPPSNQVIQNVSARL  
DAAIESHNAKEKLP HDAKDMFTPVSPVTVPPSSPLARKLAKELGIDLRAVKGSGPQGRV  
KRDVEAFAVSPRTQTVQPDVL VPQPSAPAKIPVSGKRAVIARRLSEFFTAPHYYLKKK  
VSAEKLLALRQFSAELAQSTEKASLNALLMKLAAEALKRHPEINVHFASDYIEQFAATDI  
ALAVALLDDGLITPVVRDCADKSVRQIDTEMKALIEKARTKGLAPSEYEGGTFTITNLGSF  
GIDEFTAIINPPGSAILAVGAIKKEAVPQEDGSIGVISMMTLTLGCDHRSIDGAVGARFL

KDLALFIEEPASVLL\*

>SPSA8\_v1\_670006|ID:41146262|lpdA| Dihydrolipoyl dehydrogenase [Spirochaetes Bin 1 SA-8]  
MIEKSFVILGAGPGGYVASIRASQLGLTAAVIEKDNPPGGVCLNIGCIPSKALIHQASL  
FSGGKALLEKTGAAIDLSGFDYTPVYKASRLAADRLSKGVA YLLKKNKVELIKGFGRLSD  
KNSVLVTSESEEILVRGKAILATGSRPRSLPGFEIDEEKILSSTGMLMMEKLPKSMIL  
GAGAIGMEFAYVLSFGVEVTVLELMSQVPLEDEESAKVVEKAFLARGIKIHTSAKAER  
AEPSETGVKVS LTKDGTAAVLEAEKLLVSVGRAPNTENIGIESLGVRSQRGYLETGEYY  
ETSASGIYAIGDITTQQLAHVASKAGEIAVEHIAHLLKGSPEPAEKYINPYTIPSAVYC  
EPEVASFGLSEKKAKDLAVRYEIARFPFRGIGKAVATEVPEGQVKIVFTPDTGAILGASI  
AGAGATDLIHELLLASNAELSLEELADMIHAHPTFSEGIMEAAKAGLGRAIHI\*

>SPSA8\_v1\_670007|ID:41146263| putative Methionine synthase [Spirochaetes Bin 1 SA-8]  
MSAYISASGIADVHDPLPFARQALSCVEKLPESAATWSESDRELVLDDLAHHISFIAT  
AGMYQSTELLNDYIDWLKVLSSSTLGFSPSSILQSFSCLTETGKTFLPEAVSALLADWFGK  
AGARYSAHSENSSSYMKIAIENNKNASLFTALLEGKRPFAMSIENLVNNGATLIDIYE  
NIILPSQYEVGRLWLSGRISVAQEHYVTAATLYMISTLYPDDFLTARPVKPLVIAACPQT  
ELHELGIRMIADTFQYHGWDTVFLGASVPTADLLKEIQRNLPAVVNLSATIATHIPWIEE  
IIRQVRNRHGSSIKILVGGRAFFTAPDLWKA V GADGTAVHCNEAVALAENLLAS\*

>SPSA8\_v1\_670008|ID:41146264| putative Diguanylate cyclase [Spirochaetes Bin 1 SA-8]  
MNDET V LNEYSQLVNDLVNTKRELSRINAALIEKERFLSRILEISPSILYVINLKTRKIE  
YTNRFPALLGYTEEDFLGTIAIPDSLHKDDLDVDRHYAALREAQD TDILEFEFRAAH  
KSGQTSWMRCRESIFARDELNMPQKAVGVIEDITSRKMREHKLIEESTKDVLTDLLNRRG  
FFLFSASLMSRCAAMSQSCALFYIDIDNFKMINDKHGHGEGDEALKALAEIMRNTFRTSD  
LVARLGGDEFVVLMPDV DENTIDVIQKRFQKLLDEFALISSRPWSLSVSVGVAFQMSGQI  
LPVSELLKIADENMYRNKNSMQNTLNQS\*

>SPSA8\_v1\_670009|ID:41146265| putative Polysaccharide deacetylase [Spirochaetes Bin 1 SA-8]  
MKNPSVAFYKRLILISVALLILLPVSASVYLLIENRSLKARQIFAVSQPDDVVTVGTTQI  
EPNNVMKDKPVL SYQILY P DFRSDFFGFNNDLVSNKTVFITFDDGSPSGTSKILDILRKE  
SVPATFFVNGKSNPFLTAQLDRILSEGHGLGMHSYTHRYNVIYASMENFLDDFNRFNYI  
KNETGVSPQILRFPGGSINIFNIGTYQSLIAEMLRRGFYIDWNVSAGDAIPGATAQSII  
DNVVHGVHLCWGP AFVLLHDNGSPLLNEALPVILETLKREGYEFRKIDNSVKPPMFIYPD  
\*

>SPSA8\_v1\_670010|ID:41146266| protein of unknown function [Spirochaetes Bin 1 SA-8]  
MKKPGNFSKAMEELISGKTAASESEETAKEEPEIYMTPDYAPKARGEAVITADMVIKGS  
INSEANISISGSVVG DVSSEGDITI QGKVEGNIKAQSLMVQGGTITGDILASAHVVVADS  
AAVNGNIKADRIEINGKIVGNLEASSRIVLNQKASIEGNITAGLLSVLEGAELKGNVSIK  
KA\*

>SPSA8\_v1\_670011|ID:41146267| Molybdopterin dehydrogenase FAD-binding protein (fragment) [Spirochaetes Bin 1 SA-8]  
MEIKEYVRPASLDEAYSFVVEKKGFP LGGAWVHMNVRSDLAVDLSALKLDYIVDKGDA  
VEIGAMATARQIETSALLNQAFSGAFARATXX

>SPSA8\_v1\_680001|ID:41146268| Dihydropteroate synthase (fragment) [Spirochaetes Bin 1 SA-8]  
VKQSLLLANDRRLDIGKKPIIMGIVNITPDSFFPESRKS DPERAVEHAVRLLGEGADILD  
FGAESSRPGSKPVTLEERERLIPVLKA FRKQSNAPVSV DTRHFDAIXX

>SPSA8\_v1\_680002|ID:41146269|dxs| 1-deoxy-D-xylulose-5-phosphate synthase [Spirochaetes Bin 1 SA-8]  
MSLLEHHPDQDLKNLRERELRILAEIRAKILKTVKKNGGHLSNLGVIELTIALHRVF  
DSPKDAIVWDVGHQSYAHKLLTGRAKAFRSIRKKGGLSGFPKRSESIHDIFDTGHSSTSL  
SSAMGLLEARNRLGQEGYVIAVIGDGALTAGMAYEALGNISQLGLPLIILNDNKMSISR  
NVGAVSRYLSRLSASVRYQSFRSTIDSLLLRVPHVGPRLGLVVRGKRAVKAIFFKENLF  
SDFGLE YVGPIDGHNIPVLLQVLEQVKRIERPVVHVVTTKGKGDEKAEDDPEQFHGIAP  
ACPDEPAKNASFTEVFGSEMAALAAKEPRLAAVTAAMAKGTGLSVMKKLYPARVYDVGIA  
EQHAVTFAAGLARGGLKPVVAIYSTFLQRAVDQVFQDVALADMPVIFAVDRAGAVGDDGE  
THQGLYDIAIFKSMPNLILLAPSSAGELKLALQYAVLQHPVMIRFPKDMAACEDAALTV  
DFISGRGVFLRKKNF SRVLVCAAGPLAMTAAAVSDRLEQEGISVDVFNLRFLKPLDTEFL  
SIFKKEYERIVSIEDGVVRGGVGESLQSVLASAGISLPLTTMGFSERPLPQASRAELLAS



ACLDEAGLHAALKKQANLGKGVLPSETITAACK\*

>SPSA8\_v1\_680003|ID:41146270| protein of unknown function [Spirochaetes Bin 1 SA-8]  
MRSITLYTLHLHKALEYQTFLGAGKTSRSPQDYTSVPGEEIWLFDDAKLVINDPDNGPR  
IQTPWPAAHFAGFKTEPAQTGDQASRITVKAGDYLFQWRTKDFADPSEGFEFIRQIWW  
EQEKTEGPWILRIVREDNDIAFQGLRKKIGLKSA\*

>SPSA8\_v1\_680004|ID:41146271|alaS| Alanine--tRNA ligase [Spirochaetes Bin 1 SA-8]  
MITIHELRRKYEFFKSKGHAEISGKSLIPENDPTVLFTTAGMHPLVPYLLGEPHPAGNR  
LTDYQKCI RTGDIEAVGDPSHLTFFEMLGNWSLRDYFKKEAISWSFEFLTSPEYLGIPVE  
KLSVTVFAGEDGIPRDTDSAEIWKSLGIPEERIYFLPREDNWWGPAGETGPCGPDTEMFV  
DTGKPACGPDCKPGCHCGKYFEVWNDVFMQYNKNAEGKYVPLAAPCVDVTGMGIERTVAML  
QGKKS VYETEAFMPILAVLEEISGKKYGAEGNDPEIDRSFRIIADHVRTSTFILGDPKAV  
LPSNVGAGYVLRRIIRRAVRHGRKLGIEGPFSLKPALVVIENYKAPYPELVENRQRIVDE  
LKAEEEEKFLQKGEHEFEKMLPNLLKNPQKIMSGRLAFKLYDTYGFPIEITEELAAEN  
GLAINRQEFDEAYKKHQELSRAGSEQVFKGGLADHSEIATRYHTATHLLHKALRMVLGDH  
VAQKGSNITAERLRFDFSHAPMTREELEK VQAI VNEQIQRDLPVSMAMMGLDEAKASGA  
IALFGEKYEQVVKVYAIGDFSKEVCGGPHVQHTGELGRFRIQKEQSSSAGVRRIVAVLE\*

>SPSA8\_v1\_680005|ID:41146272| conserved protein of unknown function [Spirochaetes Bin 1 SA-8]  
MKILVTGGFGNVGRSTVNACVRAGHETVIFESPSALKKAKAGLQSLIKTRWRACRLMTGD  
VRSFQDIERALLAFEGGPDIIHLAALIPPASERDEAKTRSINIGGLQNILAVCTKNNLH  
PRIVFASSIATYGDRLKDFWIRKDDPLHPSDVYSQTKAAACEQLLSQSGFEYVILRLSYVA  
WAQWLPFDPLLFAMPETRIEIIHTEDAGRAFTNAAVLPGIGGQIFNIGGGAACRTSFRA  
YLRMFRYFGLGNSDFLSDELFAKDSFHCGWYADSDEADSILQFRRTLEDYEEVRWEK  
RLLAPFSSLAAPLVKAWLVKMSPNFKKKPKERGAGIRGRAQLKRRGI\*

>SPSA8\_v1\_680006|ID:41146273| protein of unknown function [Spirochaetes Bin 1 SA-8]  
MPRKKSELRRTVIIETAKRLFSAEGFERTSMNLLARSMQVPVGSVYTYFPSKDALLSAIV  
EEGWSQFIDTLESGFSQVNEHVPDDHERPLQKLSFLVLLPQLFRDADLIAILLSESGK  
PHHLDEKLSYLSNLIAGILDEFKAAEPGRVDLDSASIRTGLSVMLLGSLETVRLNHQTGL  
AIDQNEIIRFLCASVEHVLGCRLPVPSVSF\*

>SPSA8\_v1\_680007|ID:41146274| Asparaginase/glutaminase [Spirochaetes Bin 1 SA-8]  
MQLMDTTAMRVIVTGGTFDKHYDEIKGELTFKDSHVPEILKRARVTVPVQVELNQLIDSL  
NMQDQNRLSVLEACKKAEETKIIITHGTD TMTMTATLLGQAYLDKVI VLTGAMVPYRVL D  
SDALFNFGAAFSAVQLLPNGVYIIMNGRIFSWNDVRKNKTKGIFQTLSEE\*

>SPSA8\_v1\_680009|ID:41146276| protein of unknown function [Spirochaetes Bin 1 SA-8]  
MKSFAGFSSILIGNFFVSETKDNISLSRLKLVLAGLLQDALSASKAAHKNTAPLARNGLY  
GTILNKNSL\*

>SPSA8\_v1\_680008|ID:41146275| Transglycosylase SLT domain protein [Spirochaetes Bin 1 SA-8]  
MVPYRPLRAKGA VFLCAALLALSASCSRPASTNLSLDSEILSLVSDTKKLPISIEEKPAN  
DFIAKFYKNSQTKNSVLDFFASLTNDRAVA AAILDNAVKHEVPASLAF AIA YEESRFNPK  
ALNINSGSKDRGLFQLNSNTFPELKESDAFNPEINAKEGIK YFKHVLDLSGNEISALAMY  
NAGRTRVTQKGAPVTTLDYISRLTYEKNIASLFTAKVVASSSLINRIKFGLLTDDQEKA  
E\*

>SPSA8\_v1\_680010|ID:41146277| Transcriptional regulator, TetR family [Spirochaetes Bin 1 SA-8]  
VSISVEHDKRKEEILDKALDV FVVEGYKDTTFQKIAERCGITRILYIYFNNKKEIFASC  
IKRFMKNLEHEILLIAEAQDR TSAEKLVAIGEMVVQICEKESRLLSVLDYLLKKTAGG  
DPDERVRRRTIRMRHILSYIIIIEGKKKGFEFSRDISVKATSELFYALIEAAVFRVTVRGKA  
TMDLAEPLKLLASTLSDKKS\*

>SPSA8\_v1\_680011|ID:41146278| Alpha amylase catalytic region (fragment) [Spirochaetes Bin 1 SA-8]  
LGSSNRRINLAPK PREDYSTGMKQKQKILACSLSAFGLSGIRTGDRVMEFHIIHAGIRSR  
LAVSSSLFASTGNLILPDFYSSRVMAEKIRSLILTEGRDAKDISAGKLNAMALIDEILHI  
IFLLYRESVAPDVMKKFESSIQDAIGKEEFDLLNEFCVQFPFRDVYQGLTAPEDYLAGS  
TSRDQTGIVPPSGNQK KVPNRELALEELILLKLANENPAFKTFKFLYDDGLRDTGTVSG  
TLSAKTKYSTVFKVLEKVQLELPGFGPTGTMMPILELLRLPARMAPDSVEKQLLWIRDNW  
GATFREIKDKVLKTLDLIQEEEMPRFPPGPGPIKPYQYALQRHEYEKFSDDQDWMPSLVM  
IAKNALVWLHQLSVQYGMLITRLDEIPDQELXX

>SPSA8\_v1\_690001|ID:41146279|whiG| RNA polymerase sigma factor WhiG [Spirochaetes Bin 1 SA-8]  
VHQYAPLVKYVAGKVISNLPPSVEYDDL VGYGVFGLFDAIEKFDPEKHVKFKTYAVTRIR  
GAMYDHLREIDWVPRSVRQKAKEIEQAIMLLESKLRPASDSEIAACLGLTEDEFSKLM  
KIASTAVLSLSDVWSSGTDGEHGLGESIESPAAMNPVDVNMEKKEIRR VVIQCIKELPEK  
EKKVLVLYYYENLTLREIGQILEVTESRISQLHTKAILRLKGLTSYRKGLF\*

>SPSA8\_v1\_690002|ID:41146280|atoC| fused response regulator of ato operon, in two-component system with AtoS:  
response regulator ; sigma54 interaction protein [Spirochaetes Bin 1 SA-8]  
MQCTILVVDDEKNIREGLGEAFRMEGYEVLTAADGLEAKNLLDEKYIDLVISDLRMPKLD  
GKELLQYIKRQWENIPVIIITAHGDITEAVQAMQLGALEFITKPLDLEHLLKLTKKALEF  
RELSIKNQELREEVEAQHRISIIIGKSPAMRKIFDLVRKVAPTKASVLITGESGVGKELI  
ADAIHNLSRRDKPFVKVHCAALAESLLESELFGHEKGAFTGAQARKRGRFELADSGSLF  
LDEIGEINQNVQIKILRVLQEKKFERVGGESTIEVDVRLIAATNRDLKAEIQEGRFREDL  
YYRLNVVNIHVPLRERREDIPLATTFLYEFAHENGKDIQGFDPKARQALFSYSWPGNV  
RELNCIESAVVMASGKVITLDDLPPGPRSTQDRTEIRIPAFCTLAEAEEKIIIAETLAL  
GGNKTKTAEVLAIGRKTLYQKIQEYGIEPADIEKASLES\*

>SPSA8\_v1\_690003|ID:41146281| Chemotaxis regulator-transmits chemoreceptor signals to flagellar motor  
components CheY [Spirochaetes Bin 1 SA-8]  
MKPAFLEKALSMAGKLDNFNDLVKLLNLVAMDDMRLEAAIQSMFDGIIVCNREHVPIINK  
SAERILKIPSDFGNKPLWQGITDEDLQFFHEGLVSEENIMGNEFAIDCPGGTRIVAISL  
STLVFSEKISGTIIHIEDITEKRKRETQLRRAESLAALTTLAAGVAHEINNPLGSLSIHI  
QLMERLLKNPQKLDLDRALLHHLGIVKEEIDKLEHIVKDFLFAVRPMDIQLLNQDLKPILE  
EIADFVRPEAEKYNIKLKVSQKDLPKILLDKRHLKQALLNLIQNAIAAMSDGGTLKLEA  
KKADEEIRILVSDTGIGIPEELLTKIFEPYFTTKKNGTGLGLTITFKIIEHSGDISLES  
KPGKGTTFTHLPIQAERKSLPIYDEDAVSAGSHVEA\*

>SPSA8\_v1\_690004|ID:41146282| putative DNA polymerase III domain-containing protein [Spirochaetes Bin 1 SA-8]  
MYENLLAQDSIRQELIRMLISSEIPPAMLFSGPPASGKLTAALETARVLSCTKAGHWNCV  
CEDCRRHRNLIHTDLLLFGKRSFPIEIAAARDALIEKPGKAAAYLFTRSVRKLLSRFNPV  
LWQGEEQKADRASPIIQEIEEALDTIDPETITESALNEKTIKTVDEIKLACANLEPFVPE  
TVSVAMVRNMDSWAHLAPSGQRKTVIENADRMQDAARNAMLKTLEPPESVRFILLTSR  
RASMIATVLSRSRIFSFSQRDAKATRMILERVFKSNSDADSLSSFFESKMPFSPSEANRY  
AELIAGLLLLDCAKTGLPVEGYCSGIARQAAASSKTMRDVLEELSESTKSFSGSKDKAFA  
NSFLQVMKFLLTVFSRMLAESSGNPELMLLIDRWSNHVREAAVQYGSLNRSPELLLTVLI  
STFGDRP\*

>SPSA8\_v1\_690005|ID:41146283| putative Colicin V production protein [Spirochaetes Bin 1 SA-8]  
MSTIDWIFAGIVILAGIRCFVKGFFVAEVLVVAAYAAAGLLAAVLFSNKVTVFLAENLKLGN  
LNSTILYIIAFIICFILGFIIMKILEKLLREGLEANLEIFDRIIGLALGLVEGLAFVVSF  
ILIILEMQTFFPIDKTLATSIFAKTLLPIVGPATQNLQPALDSVGGQLKLDEIFRKK\*

>SPSA8\_v1\_690006|ID:41146284|murG| UDP-N-acetylglucosamine--N-acetylmuramyl-(pentapeptide)  
pyrophosphoryl-undecaprenol N-acetylglucosamine transferase [Spirochaetes Bin 1 SA-8]  
MKSGEKAGISADKALMADKGLPRDAKTIAFTGGGTGGHIYPGLAVIEALRQRGFTGRIFW  
IGSQPLEREIVEKQGVFYSIPSGKLRRSFLENFIDLFRIIAGYFAARALLAKTKPDV  
LFSKGGYVSVPPCRAAVSLGIPYVTHESDASPGLATRLNAGKAVRILVSWPGTAQYFDPE  
TKKVIVCGNPVRPSLLASSPEKGRKLLGAPDGLPIVAFIGGSQGSRQINELVREALPPE  
GKAFVHQTGSAHFDPKAHAAIPGRYFAKPYFLEEMGNVLASARVAVGRSGAGMVWECAS  
LGIPMVLIPLAGSGTRGDQVENAQLAAEAQAARVLSGDAVSGQAVASAILGYLEDEKAWK  
QAHNAALALSGIDREDGSRTTSADYIAETLLNMIRQS\*

>SPSA8\_v1\_690007|ID:41146285|pgi| Glucose-6-phosphate isomerase [Spirochaetes Bin 1 SA-8]  
MTYKNLDSASFQALKELPRVSIAESLTPERIESYTIPAAEGFLFNAAAAPVNEKIIDAL  
QKLAEEQELVEKYRALIEGEIMNTGEKRMVLHHLARGQLGKAVVFQGGQNLDFYENERRK  
IAEFAQSVHAGTLVGATGKQFRTVVQIGIGGSDLGPRAVYLALDRWAEAARRKRMKAIFI  
SNVDPDDADHTLASLDLETSLFILVSKSGTTQETLANETLVRARLESAGLDSSRHMIAVT  
SKTSPLAQSPDYLAFFIDDFIGGRYSTSSAVGGAVLSLAFGPETFLEFLEGAHAGDSAA  
LEPDIRKNACLLDALIGLYERNICGYPCAVLPYAEPLVRFPAHLQQLDMESNGKSVNRS  
GEVLA YKTGPVVFGEPTNGQHSFYQLLHQGTDVVPLQFIGFAENQNSSDVISMGTTSRQ

KLMAFIAQIVAFARGKKDQNPNCFTGGRPATLLMARQLGPRQLGALIAHFENKVMFQG  
FAWNINSFDQEGVQLGKVLANKVLSIMQGEKTDATALETARLTSKL\*

>SPSA8\_v1\_690008|ID:41146286| RecQ family ATP-dependent DNA helicase (fragment) [Spirochaetes Bin 1 SA-8]  
MKEDTEFFEDGVNEDPVANLACERFHIPYLMPLQRMVIANILDSLDPNAEQICQMALF  
PTGFGKSCIFQLPALFLPGLTVIVYPLLALMTDQQKSLERLGIPCSLFRGGLAKEEEQAV  
FSALKSGASNMLITNPESLSRPDLLSLLQNRIISHLAIDEAHCVSEWGETFRPAYLALGK  
IAAMLKPKVFSFAFTATASPLVEAAIAKHLFAGSGYIRITADIDKPNIHVHMVMSLCPHRS  
LERLLECKKPAIVFCQSREGTRILAEMVERRLPFESRFYHAGLEREEKIAIETWFMES  
TGILISTCAYGMGVNKNIRTVIHYGSPSTEAYIQEAGRAGRDGEPAEAILLKLPAEEN  
FAASDPDKTADSADSGVEAAREARRAFLAYGMDGRCLREQLLNLMGANLDSPCSGCSVC  
DGTWSQEPQRELQVFFSANPFRFSLYQSIGFLNMRADVAGKNARKPRCRSAGVLQDWQ  
RRDSMLAIREGLRRGIIVEKARGMRKGRIGIEV\*

>SPSA8\_v1\_690009|ID:41146287| protein of unknown function [Spirochaetes Bin 1 SA-8]  
MKSVALSKKPWTVKSKALLPRHADSFAQPRHRTALHVGQAQRLSRTADMLAMAXX

>SPSA8\_v1\_700001|ID:41146288| protein of unknown function [Spirochaetes Bin 1 SA-8]  
VEGLGNGWRFSAGRRSVNIGAGTYSLTVSGANPWYDHVLAELEAPLSAGSLRYDFLAIST  
QRRSGNDGKSLFLHQIGFDFPWSASLAEFNTVAGVPLDLQDIGPFLIYHHLFAGGSNVM  
FKLDGQLKPSDRLRAWGCILMDDFQLSSESTASNPNAFGFEAGLEAVLIPGRSSERARFF  
RKDYAVSLGPEQLDGRLKASLQWYWASTYL YRRVASAPNEAFYTRYFLQNQNFQWAVVEP  
WFSYPLGPDRLFRADLRYSKERLSLKAAGTFAILGSESEDEYTYNSPYASNWLGPQPPLS  
YSLKAELATEMTLGRQSLVSGSLYMIWNTGEATEVGLQLGFIHRFSLPR\*

>SPSA8\_v1\_700002|ID:41146289| protein of unknown function [Spirochaetes Bin 1 SA-8]  
MDTSENWKPPHLVLLIMPCILAKVKFKITINLQEEFPEERLSIAEILKKNYSFPHII  
TRLNGKLVERGQRDSTYAQDGDDELVELYHLISGG\*

>SPSA8\_v1\_700003|ID:41146290| putative tungsten-containing aldehyde ferredoxin oxidoreductase, 4Fe-4S  
polyferredoxin subunit, beta chain (AorB) [Spirochaetes Bin 1 SA-8]  
VIKYLKHTDEKCVGCNTCVSVCSRLYFKEENPAKSSIVIQNTGKNQFQITVCDQECRLCV  
DECPVQAISISKAGVVLVDKCKCVGCLACVAICPIGAMRYYPGQSTVFKCIACGACAKEC  
PTGALEIATKEEKPKTPEAQA\*

>SPSA8\_v1\_700004|ID:41146291|aorA| Tungsten-containing aldehyde ferredoxin oxidoreductase, alpha chain  
[Spirochaetes Bin 1 SA-8]

MSIQKVEFKLVTEYSYEKKPVLRGYNMRTL AIDVVGKLSGGKPGAILPPESPAIAEKPVSE  
EMKKRFVGGKGFGRMLLWDAIKPETKWDDPENDIVIAMGPLCGNTNYPGSGKSLVVTFSF  
LTGIPIDSNVGGYFGPYLKFSGFDALSLGKSDRDLIYIDGDEGKIQVFEAPAELES  
DT HLLAEQLTHAFAANEEDRQHVA VVSTGRAAEHTWLGLLNFSLYDKRRKGIRVKQAGRGGI  
GTVFRDKKIKALVCKYSHVTQENHAADPAALQRIGLKLHREIMKHDDEQSKMRKVGTAH  
LMEIMNDYDLLPVKNHRYGQDKDAISLASWWQKYFTQGMPDGCWYGCTLACAHAVDHFE  
LKTGPYKGGKVVVDGPEYETAAGVGSNLAIWDPEGVIEINFYCDTYGIDTISFGTIVGFL  
MECWEYGILNEARTGGLKLEWGDWKAACELLHQMAEGKGFVLAGRTRYLAQYFAANFG  
ADPQLMKDIALNGKGLEQSQYLSKESLAQQGGYYLTNKGQPQHDEAWLIFMDMVNNQLPTF  
EKKAEALHYFPMFRTWFGGLQGLCKLPWNDIEPADNAKWPEPNKVPEHVDNYRQLYQAVTG  
EPLTWDELIRQSERIYNFQRIFNLRMGYKRNEDYPPYRAVGPVTEAEYLSRQERYDKQL  
REKMGLNPESMTLQEKMAATRKWREQQYESLLDAVYKRRGWNNNGIPTPEHLKAIGMDLP  
ELLEVVQKHL\*

>SPSA8\_v1\_700005|ID:41146292| conserved protein of unknown function [Spirochaetes Bin 1 SA-8]  
MYRKLTEAECDAMKNGEFSQAI VSSKPSVAIVLTQSWCPQWGW MRSYLPALAEAPEMDI  
YWLEYDHEPFYDEFLEFKEDRFGNREIPYVRYRNGKLVKESNYIDKAGFLRMLKN\*

>SPSA8\_v1\_700006|ID:41146293| conserved protein of unknown function [Spirochaetes Bin 1 SA-8]  
MKHGLKRLFLSLGGRALTVIPQKVPVLFSGLGAVRKIPGELATLKV GKPLIITDAGVERA  
GILAKLTEILKSASIPYAVFSGITPDPTFEVCEKALEALRVNSCDSVIALGGGSVMDAGK  
LVRMGATHKKPLARFAGLLRCRNRGLPFICIPTTAGTGSEATAAAVITDSVKHRKVTVLD  
PRLPPDSTILDPALTAGLPPALTAATGIDALTHAIEAYCNTLHYRDVDVQALEAARLIFA  
NLPRAYADGSDLEARENMLKASHIAGRAFTRGFVGYVHAVAHRFGEKYHVPHGLANAIAL  
PWFLDFYVDVCPERLADLADMVLRDTRREYTRREAYSGEAEVAAAPETHQNSEPRNPEF

NLRSMNKAERRAWYQKKARAFCDAVKALELEIGIPGKGFIRAEDIDSIAEGAIKEAHGT  
PYPVPAVLDADDLKT LRKMMK\*

>SPSA8\_v1\_700007|ID:41146294| Peptidase M16 domain protein [Spirochaetes Bin 1 SA-8]  
MRKKSCTRKA VCFALLAFLLLPLQLLSAQAQNHVGHMVLPNGLEVFVVENHSVPLVTVC  
VAFRGGASAQTPETAGLFLHYEHMMFAGNSKFPTKESFNAALNSMGTTAWNGATGTEYIN  
YYITVPSEKTDEAVEFWAQA VRNPLFEPAVLENEKNVVLNEIKGYHADPARIAANALESR  
MFKDYPWRKNIDGPEYNVQSTTVQVLKQMQRYYVPGNMALMVGGDCTMEEIKALAEQYF  
GDWKGQGAPSFDPVPHGKIPAGINLVSVEDQFYRGIGNIQFRWRGPDVLAQAQDQTYTSDV  
LLFLLSSPIGRFKDSIMKKVEGLYDAEYIDFTYPTARDGGNYIFSTYMLIQKPASEGAVL  
DRVMNLKNAVLEDEFKEIARDPSGYFGSNELQKAKTKLIDQNIFAMESAESFVTDLTFWW  
STATADYFFGYEENC SKVSWDDIRALIQH YITGSEASPAP EIA TMLRIRTSTFGSDSRMA  
AKMQEYGF EKVNADNAFWWQR\*

>SPSA8\_v1\_700008|ID:41146295| Peptidase M16 domain protein [Spirochaetes Bin 1 SA-8]  
MKNMLWKKCAVLAVAMMMLFTIGSGVSAQAAQKV KVD FVEMNRTTFRQFTLSNGIPVYIK  
ENKANKVRNISFVLRGGSL TIPQEKAGWPLLAFKTAARASVNYPYAVVTDLLDETSSSIS  
ASATFEY TALS LNVLDKYFAKLLPVWADMVTQPAFAKSDFDQAKSEVELNVQSKDQNPWA  
KTNLLTNQKFFEGHPYAANPDGTEGSIGKARLDSIRAWYTENLSADRAFIVA VGDFSNEA  
LETELEKTFASIPNRLGPVPKATAFAKTAQGRLYTEEDEQSRGVVYMRGDFTAPSPDSA  
DYFPTSLAMKLFSDLLFTIVRDQYGA VYTPGSYIRSFGANYGSITYKTSATEKIKSYID  
EAAEVM AEGRCVSVDP SRPGEESKFMII SDALEAYKQMFKNEYFNAVRTNSAMAGMMIRS  
VVNRGDPADWIMDVQRIQAVTPGQISEAFSRVYLDGGFIWVALGDPGLLRKLN PADFTRL  
GK\*

>SPSA8\_v1\_700009|ID:41146296| protein of unknown function [Spirochaetes Bin 1 SA-8]  
MKNAARLFAILFGLVLI AATVINADLIVKSQKALADGIFR SSSSAKPARYHLVAVFPD TD  
DSYFRGLINGLNEEASKIEAVVQIFRYPAESNTEAERYFN LAMAARVDGLIMFSKRGDPL  
AERKALADRSNVR FIPVFMDSPLDED TFFVGS DLKKQGFASASAILPRLGNSARIGVILP  
QTGSENILNEAFYQGVLEAMKNFPGARVVA AIRSRPGAMSGEESAASMLDSREPVNXX

>SPSA8\_v1\_710001|ID:41146297| conserved protein of unknown function [Spirochaetes Bin 1 SA-8]  
VNDHLIRCPFVVLIRGRSINLILDIPDLEL SSENFFLVAREY GICSGYIDLLIITEHADI  
VVVETKLF RNPES SRKVLAQVIDYIKTLAQIDIDEFIAQIDNIKEKRIDINRKSDDRFLA  
VLKRNIERGNILAVILGDDINTN LLEMVSSIH SAPHLAFS ILLSLET KKKDNLLILNPT  
ILSKTKEIERSVINISIDMIDKNVKISAQAPEKKGK GSKPIISWEEFLTNFDDKERIRIL  
DKFHTKWLSIDSEGFNMGTAGFSAGI IKNRIRIPIQYAYSANLELFTEKKCKSLGLKDSI  
YELYKNHLKSQQNLYDKYVIANKTYIEYSKISNTE LNAILEASIKVAEKIKNEEV\*

>SPSA8\_v1\_710002|ID:41146298| Phosphate transporter [Spirochaetes Bin 1 SA-8]  
MKIPIDWLIEGEPWIEYRARRDLLGQSENDPQVKS VRKSM LANAKVQDLVAELSGWPGTV  
ISSHKSASQPFHKLTFIADLGLTATDPGVDTIVEHILKHQSAEGPFQLPMNIPMHYGGKG  
EDQWAWALCDAPLIVYALVKLGVENEPV VQA AIKYLVGLVCDNGWPCVVS KELGTFRGPG  
RKDDPCPFATLAMLKALSEIEALRNSSACHTGADTIL TLWNESTRHPYMFYMGIDFRKL  
KVPFVWYDLIHMLDVLSRFPWLK KDARLLNMLEILKSKADRQGRFTPGSIWAAWKDWEFG  
QKKEPSRWLTL LAWRVIGRIETDSM\*

>SPSA8\_v1\_710003|ID:41146299| conserved protein of unknown function [Spirochaetes Bin 1 SA-8]  
MKKFALFVFN GDPMCFIHVLLNALDMKAKGHEAKIILEGASVKLIPELVQPGNPLHGLWK  
MNLA AHLVEGVCKGCSTKLG TIEAAKEQGLALLDDMSGHPSIAAYRDKGYEITF\*

>SPSA8\_v1\_710004|ID:41146300| protein of unknown function [Spirochaetes Bin 1 SA-8]  
LQRQKKAKVKFSSFGISYITVIYSSLTVNTSKTVRPYFYCKNHVQORTH\*

>SPSA8\_v1\_710005|ID:41146301| conserved membrane protein of unknown function [Spirochaetes Bin 1 SA-8]  
MITMPDKFIRRLIMTLTG V FICSFSVGIFNLAAFGVDPFQCFAQGSFLLFAKH FQYGTYY  
LTISL VLLIIILIWDKHYVGIATFINMFLTGYIVDYSFTFLVHLLPDVDLLQRMLLLLVA  
VLIMCFG SALYYTADLGVSVYDAISLILAKKKIAVKYIYV PFKWIRVFNDLICVTLGLTLF  
GKM PGVGT LITAFFMGPLISLFNKKFAEPFLQMDFMNHE\*

>SPSA8\_v1\_710006|ID:41146302| Major facilitator superfamily MFS\_1 [Spirochaetes Bin 1 SA-8]  
VPFINRLLHWFIVGIGTTVMSLMLLSK GSTVDTLGFITAIYSVFIVLFEFPSGVLADILG  
QKKIYLVSLALSILGYTIVLFSNNLVWLFIGFSFYGIARACSSGSVEALFISQYIQKNGK

ENLHRLMSALSSGEVIGLASGALLGGVIPMIWAQYFPGQNKYNGNLIVQIAALFILLVFT  
WFGVQETRDTEKHKQLMMVHIKESLSIVLRNRNILLILGTMTWGFCFNAILYWQPQVK  
GILGTDAQTWIFGVINSYFFASLLGVGLINLLKRSIAQRLVLFVSRILAGLLIVVLS  
FQSTIVAFTSVYLFLFLMNGMMNIPEGTIMNSLIPDEKRSSLLSSSLMMQVGGIAGSVI  
YSMLVKISIRISGVWILSGIVFGVSSMLYLSLKTDFKKPGV\*

>SPSA8\_v1\_710007|ID:41146303| Pyruvate/2-oxoglutarate dehydrogenase complex, dihydrolipoamide acyltransferase component [Spirochaetes Bin 1 SA-8]

MKTRKVSEFRKLSIYGFQVTENSHNFYALLEFDITEVRKYLRERRVSGKSGSLFAFLKA  
IGRCLTIFPDFNSMIDLKRISTFEEVDISIPVEIFKNDEIFNKQLVVRDIDKKSADIDN  
EINQSKKADKNEKAYVPSPPFFQKLITMMPNFIKPLFNLLIRNHTMVKELSGTAFVTSVS  
MFSNIPGYIIPYVGKPKSCSFALGSVYKPKVVINEQITMREINITAIFNHDMIDGAPAA  
RFINQLRKFIEMEYIDLID\*

>SPSA8\_v1\_710008|ID:41146304| protein of unknown function [Spirochaetes Bin 1 SA-8]

MFDLLKIVNNTRWIDYGLNIINIFIIDELEKLQNRSRFFNFHSEWAHKFSFCESFKT\*

>SPSA8\_v1\_710009|ID:41146305| putative 1-deoxy-D-xylulose-5-phosphate reductoisomerase protein [Spirochaetes Bin 1 SA-8]

MSSHRKTVIITGANRGLGKAAAKEIARAGCRVIMACRNTDAGEIARSEIIADTNNSDIHV  
LKLDLASRASIHEFIDGFSRQFGLSNVLINNAGIAKQEFKTEDGFEINIGTNFFGTYVL  
TTGLLPFFDELHEKRIINLTSNIYRIGWFKTEHINRYRWFRAYAVSKRMILLYTKWLAED  
KELCDFRVNAVHPGIVDTSIMYTGQWYDAVIKVLCKPFFITAEEGARTCVSLALDMAAVN  
GKYFAKGEQREIRLSRMIHERDDLAFRCRMLNSG\*

>SPSA8\_v1\_710010|ID:41146306| protein of unknown function [Spirochaetes Bin 1 SA-8]

MSKETILTNGTIYSLEREGERFDTMLIGSDGRKKGLYRKGEQPAVDVGIAILIAVGSAVS  
IR\*

>SPSA8\_v1\_710011|ID:41146307| conserved protein of unknown function [Spirochaetes Bin 1 SA-8]

MYEKLIETLTKRFMDNSKRHQGLDWDSIAERLQKNAALLILEAMEATGGEPDVIAYEKA  
GNSFVFCDCSAESPSGRRSLCYDDHALELRKANKPAGSAVSMARKLGVSLLTEEYRHLQ  
TLGEFDLRTSSWIMTPPEIRNLGGALFCDRRYNRVFTYHNGADSYSSRGRFRAILKVH\*

>SPSA8\_v1\_710012|ID:41146308| conserved membrane protein of unknown function [Spirochaetes Bin 1 SA-8]

MSTTLYQKGGSTMGLEQTAKGKPAVSQDESLGKLRRFNVIMGFMHLIQGIFMWVVSNDKT  
YPIFTNYLSFDRATFTLKPNPQLLYQLRFGPAVALFLLASAMAHFYLS SIGYQKYRENLK  
KGMNPIRFY EYAVSSSLMIVLIGMLVGVWDLGTLIALFGINAMMNLFGIMMEYHNQXX

>SPSA8\_v1\_720001|ID:41146309| protein of unknown function [Spirochaetes Bin 1 SA-8]

MLITRLDEIPDQELDLLAERINGLWLIQWQRSPASEKIKQLCGNPDAASA YSLFDYE  
IAPELGGWEALDVFRGRCMWRGIRLAADMVPNHTGIDSAWVRNRPDLFIGTDRCPFPSYT  
FNGPDLSSDPAVGIWLEDHY YTRSDAAVVKRLDRRTGKVR YLYHGN DGTGMAWN DTAQI  
DFLNPEARAAVKERIIHVAQHFSIIRFDAAMVLARQHIRRLWYPAPGTGGAIPSR AEHSM  
SDEAFDKAHPNEFWREVVDECAVRVPD TLLAEAFWMMEGYFVRTLGMHRVYNSAFMNML  
KTESNSMYRLTIKNTQEFDKQILKRFVNFMSNPDEETAIAQFGSGDKYFGVCTLMATMPG  
LPMIGHGQIEGFSEKYGMEYKRSYKDEKDPVLIGRHEREIFPLFRMRKLF AEVDNFYLF  
DFVKDHHKVDENVFTY TNGRGEERALVFYNNY WERTSGTISISCPYAEKDGSGKRKRIVA  
LSEALALDPAPGNFVITREMRSNLYYIFKTADIHSHGWHVNLEGYQSLVFTDFTRVHDYN  
GSYQRLWENLHGQGV TDFEDALEEASHPELYHSLEKTIAAIDFCLLTSEKISNAAQEKE  
TGRIAEISEIYFARLAQIIVEEGGPAPLLDAV GSCVKTLKTGLKLIGSLVSDGNGALEIE  
QHNDLLEEF SRTVKT LKGRMALSYAVFILAISRLQREGNRTEELRFLLEKFLLNKKMLEA  
AENQAVSHIERPLGNEISALSEFDLGLLVQAFMTRPLPVL TAPQPNKSGKSKPLFSTPLE  
RAFELLQWAGNDPIARQALGVNEWQGIEYFSKEKMEALLFLGPSLTLLEEVLGTKAAEKT  
DLFEKLTALQPHVFS AIKTRDLILKAVVQSGYQLRSLVKLLTARGMDMNE\*

>SPSA8\_v1\_720002|ID:41146310| protein of unknown function [Spirochaetes Bin 1 SA-8]

MNNEIPCRDVLDSPLAEAIVKHISDRRY YFVFP SQIXADSWAQAVFRHPEIEALEPGRFL  
SWDRFLALIREKPRNETIRPADHYTRYLWACGALKENAENPFLRALVKPDLAPPSRYPAW  
LASIANRLNFLEDIARREYASESHNAEILDFIILSEKYRIFLERNLFEESLPLRFPEK  
SKFILFGASAYKDILWYRSMLEKSGCTEFFDVIPAEPGRSQKLRHFENFRTEARWIFANI  
RSMNLNNGKTPGDF AISVPALQPDMKAYLSVFAHEYDISITFRVGEKLS SSPFGLLNLIA

AAIDDTLSQQSVEALARQTLFVWKQPGAFKLMFEFSRMFSIPRKNAGKKLMNRVWSMTFS  
DAQFEEKEALHDFYLLQKKLSAIAAAASFQSLREALFDFRLTFIEDSGISEQSEKLLAR  
IFEELISLERAQAQSLTGVSLTGNTFQHFRAFLDTIQYAPDSSDMAVSVYPYHSGILNAAP  
VHFVLDASQDAVDSAQKFPSPESIKKLLPDDTSYESYILRSFDCVNAIYCFADTALS GF  
CVPHPWFSAEHIQTVFVNEEKQLNALSFHAREKKAWIENRPNLQPLTFGQQNAALGIFD  
SELNGQPLPPPLFDQRKTDTRQTIAADNVVDCIAPALHGSSIKINPAALGDYSACPFRRWF  
LAYIVRLQNKIPSEPLMIGSILHDCIKNIVLRISSKQPVLRKEAIQAYSIDLVIDAIQGGI  
DYQTRKSGHGARPFLAEHFRRMTRSRLTYLDLEAELQEAGWTVGEFEKSFKEKHFQLSVI  
FNGRTDRLMFRREGSEMACLLIDYKKKYIPQKKHLLDEKGTGQLAELQIPGYILLLTEAG  
FLVMSAFYYSIENAKKQVVLGDESRAAAPDAQSYFKELEALRAMLEKASEGIWSGRITAA  
SPFTKTCSNCEYRPICRANYSSERH\*

>SPSA8\_v1\_720003|ID:41146311| protein of unknown function [Spirochaetes Bin 1 SA-8]  
MTELDWRQKKA VTAGAGAGKTTVLAERYLHLVLAQRIPVTDILALTFTRKAA  
AEMYERIYRKLAESEDPFAQSQLALFSQAKITTLDSFCSSIVRRAAPDYGYSPEFSVDDV  
SATEIAEKTAQFVMANRDKPAINEFLQSHQMDAVVNDFFASLGTALVSPVNLVKPEFSP  
MEPAMRKYISDYAETQIEKMSSLCASIRSAGLGKAPHADCASIDAARRFPKESTAVIR  
ENLQLEPFISAAGQLGMKSYGKDAGESCIKEYAKELRQCAKDFPQVKDLVESFPLYSDM  
LKYLDLFAHQLAEQKRLADIMDFKDLGYCAVDTLIRRSRDIRQELKTSIQSIMIDEFQDNN  
ELQKSLLYLLAEKQSLTLDRIPASEIEASKLFFVGDQKSIYRFRGADVSVFKKLSREL  
ARSEAPTPDAESEATSLVLGANYRSSASLIDFFNDFSSIMNSDTAGEGKDFYARYETMS  
VGNEERQKRPFPSLLKFYELAENSENESSQESAGDDDTAGNDSIAESRPDSEFLSADES  
EALAVARFIRENIGVLDVSDSDGTSRKASPADFAILLRKTSPQHILIERYLRFHSIPFRID  
QPRDLFKESIANDLYNILLLEPANQPAFAVVLRSPLCRISDAGFALIMTRARGFEEIP  
STLKLDEYDSRMIARGKAFFAKLSQARNTSITRXXXFIWNYSGLRLDFLSRPDSRVFME  
HYDFIFSLAASVEAQHGTLSDFVDELGLYIENS DRKFEPGDIPRESAPGVRIMTIHKAKG  
LEFPVIVPFVHHQNGGNKARIWGKTEFGIALGLKNPEDPESKTNNLLMSLANA QEKEEA  
GAEVIRLLYVACTRAEDHLVFFGRKPSRNAPDSFYNYLNSYFNQSRKEKFSIAHRSEILE  
KRIHSEKSDTGAFKAYNAVYSQAKSEETSKQHRKERYTVSELNEISLELPVQTALSFRQ  
HSGSLVVSVPAINIKADIFGTLCHEILAWAVSRNGSLKDFIPSLPTREALTADQLQKAIS  
HGSTLAEAFFTTDVWKNSLDNAAIESEKPFLKSGDFIIEGRMDLVIESNDAVIILDFKT  
GQEEKPVYAIQLALYQAAMQKIAADKTIKAGIYWLESGAFSWLEGRMENKDIIMLASVL  
QEKENVPAENQNGSN\*

>SPSA8\_v1\_720004|ID:41146312| membrane protein of unknown function [Spirochaetes Bin 1 SA-8]  
MPSSLPCIRRQCRKSLQTKQSKLGYTGLSRGPFLGLKAAWKTRTLSCWLQCYKKNLKMCP  
LRRIRMDRNTQPPTPLMLFFMFAKITSVTLGGGYVIVPVIGSALEKKGWMNEDDFYTIFA  
KAQAFPGPLAMSTAVLVSRLCGFWGAFAAFVGILLPPFLALILVSDLIRTYGXX

>SPSA8\_v1\_730001|ID:41146313| ABC-type transporter, integral membrane subunit (fragment) [Spirochaetes Bin 1 SA-8]

MSEKKEKQAVNEFNQVMKPVSLWADAWKRLRKNKMALISLYIVSFYIIVTLFAPLLTKAG  
IYDYREQTISNASLPPSFKPAGQLVIKKLEARIADLERTLEEQAEEAANGPSGSYGF  
FGAVPGTETETADQSAEVDPNLNFSLDFGGHGTDESSNPLVRELGYQKEALEKVKTEM  
NTNRGYQKVYILGTDDLGRDMLARVIYGGRI SILIGIVGTLTAALVGILIGSVSGYVGGW  
LDNLLMRFDVXX

>SPSA8\_v1\_730002|ID:41146314| oppB| oligopeptide transporter subunit ; membrane component of ABC superfamily [Spirochaetes Bin 1 SA-8]

MARYFIRRALSLIPTLFVIVTLSFFLIRLAPGGPFAREKDVPEFILQNLKRYHMDEPLG  
KQYLRYLGDILRWDLGPSFRYRDLVNEIIDKGLPVSMTLGVTSVLAVVSGIAVGIISA  
LRQNKWPDYVAVSIAVIGISVPLFVMGPILQLFVGMRWKILPMGQWISVHGKAILPAL  
TSLFPYFAYIARLSRASILEVLRSDYIRTARAKGLKESMVVWKHVLKGALLPVVTYLGPA  
FSGIVVGSVVVETTFIPGIGRPFVQSALNRDYTLIMGEVIVYSVILIFANLVVDLIYGL  
LDPRISYK\*

>SPSA8\_v1\_730003|ID:41146315| ABC-type transporter, periplasmic subunit [Spirochaetes Bin 1 SA-8]  
MKRSLFVLFALLSVVALGAQDFTIVNGAEPVSLDPHAVEGVPEHRIYMALFEGLTIADPK  
TNRALPGIAESWSFSKDFKTVTFKLRKATWSDGVEITADTVVKS WLRKMDPKNAFYADL

PASYIAGGMDYLSGKAGPEAVKIRAVDKYTFEVQLVGPTPFPPDMVVHYAFAIVPMHAIE  
KFGNDWVKPQNWVSNPFLKWKSKQERVVVVKNPKYWDAKNVALQKVTFLANDDVNVGY  
NLYKSGGADWIDTVPESELMNEIKLRKDFHVAPEYGTYYYIFNVTRKPLDDARVRKALAMS  
FDKKALVENVTKGGQVPANSFVPPSTGYTPAKGFDNPEMGRKLLAEAGFPGGKGFPTLS  
ILYNTSANHKRIAEFIQSQWKENLGITVNLVNQEWGTYLDTRSQSHNFDIARAGWIADYL  
DPSTFSDMWVTGGTQNDGLYSNKRYDELIEKSRTLLGAERMKVLGDAEKVLIDEDMAIMP  
IYFYVTQNMIDLTWKWDGWYPNPMNTHPWKFIRPKK\*

>SPSA8\_v1\_730004|ID:41146316| Alcohol dehydrogenase [Spirochaetes Bin 1 SA-8]  
MFVFNSPTKL VFGEGTAASAGSELKALGVHKVLLVTGPGRTASQETLAGILASIREAGLE  
FVHYAGAGADPATTMVDEGAALYKKEGCDGILGFGGGSPIDCAKGIGASIGENRPIRDFI  
GTGLAFTRPVPLVAIPTTAGTGTEVTNAAVFTLVDGPKKAKKGTAGTSLFPRVALVDPT  
YHLSMPPELTAATGMDALTHAVEAYVSRNHNPISDFFCLEAIKLI LNLKRAWKNGDDME  
ARSGMALASTLAGVGLSQAGLGMVHGFAHAAGALGGLAHGMANAII LPFVLYREYISDANM  
RLAAIGKALTGRQASTALDAVSAIAELGSDIGIPRN LKNAGIPESLLPELFNDAKTYKRR  
PQSPRLFTDEELERLLYKAWSDSMID\*

>SPSA8\_v1\_730005|ID:41146317| putative Nuclease sbcCD subunit C [Spirochaetes Bin 1 SA-8]  
MRPIRLELKNFGPYRGT VSVDFSELGEFFLICGKTGSGKSTIFDAITYALFGEAPGARKG  
HERELVSDYAEIGE EPSVRFEFSLSNARYLIQRTPPYRRLKKNNGGFTEVPPEASIA CIDA  
AGREISVLASGVRDTNLKVGTLINLTAE EFSKIILLPQGEFQEFLQMDSAERSEILEKLF  
PVAMYDTIAELAAEKYK LKNELSAMEDEKSRIENQLGSDYESRYAALLLDQTQLETEVQ  
SATGMVADRKSRLDSVRDRVERA QKAMQAVQTLQALRARKPEEDIRAERLDRARRAEQVA  
HQIKAFAGANARTQEIVRKTRELESKFAELVQDQNKASEAQGKAAQLSAELQSLAREELQ  
LERACKAWANKMDLEKQALS LIQQKA EFVQEIQQKETALQKRAEELSAVEPAEEEEETQAA  
ERWERLQTQLKEREELVRTL HELAERRREISSVTAKIEQTEAARREAE LDTLITQEMAG  
LEAGLLHSEAEHLALQLEAGKPCPVCGLDHPAPAATQTADTGDSEQTIEDLKLK LASKR  
KEADASRSKLAALCATISNLTEDKAGKEKKF SVLAAHAVSACAKLAMPPALLEDLFSEEK  
ISAHIDLLDDDIERIKSELADAQKCSVSLQDRRKKAKQLRDARETIRAELDLLQKKLAE L  
EKAVAANTARLSEIAKEAGQENPEPSLLAVREKIAGYTREKEEAERYFQSWNQAKKQTYD  
RHAELKTELA AVFEQFNLELSELGALVSAGFAAPAGGPRTEHAQFSTPHFAWLSEPSEY  
SVLQNALSWRLAEKLEIEAHNAV SALGPIHELEFSAALEAVHAAELGKAERNTEEEKSRM  
YREALAKAETLAQALAHDL PQEGESLPDIAKLEQEFTEAREALDNAQTRLLENSTYLQTM  
KNSMARIAEVLV RAGKRS DVSTAEELS ALLKGELSGKRLPFFKFFILAKYFRQVVS RASL  
HLSEMSDGRYYLIPEETLSQDVSRSSAVSRAGRGRIGLGLKVRDDWTGADRSTGTL SGGE  
KFITAVSLALGLSDMIRERSGGV SLEAIFIDEGFGLDEESLDTAMNVLEKIRGGRTIGI  
ISHVTSLRN RIPNQLEVVKTAQGSTLRIR\*

>SPSA8\_v1\_730006|ID:41146318| protein of unknown function [Spirochaetes Bin 1 SA-8]  
VTALGHLHFFQSPAPRIWYSGSPMPYGV PDAGRKTGLCRITLKS GDPLAHVECIPLKPLR  
GFRKLRGFFGDILRYQPTAEEREDYVEITLC DTKPVVNPLHELK KLYPRIYFLKSEADEA  
AAGSRPSAMSETEASLLDPEKAQSDDTIMQAF AEFHQEMK GKVPSKESMDQFELL LKEAR  
NAANQA\*

>SPSA8\_v1\_740001|ID:41146319| rRNA (Guanine-N(2)-)-methyltransferase (fragment) [Spirochaetes Bin 1 SA-8]  
MPFKRSSQLSYTPD TTRRYRKKQNHVKNCQLEYLAYS VRFHHTVSMKQTLRGIALCAVG  
LEKIASKELERLGLRENERK PGRVYFDIEEKNLTQALSMTNIGLR TAERVLI EPGRFKAV  
DFDAFFDGIFEMPWEMFCYKDTKI HIERVRS HESKLFAQTSLQAMAQKAIYEKLMQNYRM  
RTMPETGNELXVRVYLDNDECSXGIDASGDALH KRGYRAMAGQAPLKETIAASLLFLSGW  
NRKFALLDPFCGSGTIAIEAALYALNFAPGLNRRFAFESMPAVNPQGVSEARS MLESHIK  
TDAEFSILASDIDPSVLNIARRNAEEAXX

>SPSA8\_v1\_740002|ID:41146320| putative D-alanine--D-alanine ligase [Spirochaetes Bin 1 SA-8]  
MPHIILIKSYTDKPWRSPETFHLIEQALRKRWDVEPIEAENLQQLDGFISVMKKQHGEDL  
FIFNISEYIDERTMQGFLPEYLEKSGIRYLGSGSMAVSTGLSKTETK KVLARNNVPTPHF  
LLIPKDDDTITLQDSALRYPLFVKPDGTGGHIGIDNDSIVKNEAELRRAVRRVHEIFGQN  
ALVEEFITGEGMREFSVGILDGAKRVFLPVEIDYSLMNPVRILSHDLAMQDQEKVIPVT  
DGKLFARLADLADRTFDALGAHDYSRVDIRMNEHDCYVLEINVMPGIGPASFLPEAAKFY  
LDMKYEDLVRKLVEVSLERQTSTAV\*

>SPSA8\_v1\_740003|ID:41146321| Peptidyl-prolyl cis-trans isomerase [Spirochaetes Bin 1 SA-8]  
MIKHGRAEVKHFHACFHHANFSGGGLLASLASCQNTNQLPDGLYATMDTSKGTIVIQLEF  
EKAPMTVGNFVGLAEGSLDVAKGKPFYNGLVFHRVEPGFVVQGGDPKGNGTGGPGYKFPD  
EFSPELKHSRGPILSMANAGPNTNGSQFFITLAETPWLDGKHSVFGKVVEGMDVVNKIAV  
GDKINKITIQRIGAAAKAFDSSQKAWDERLSAGYAALKAAAQAKRASDEALISQKWPDAV  
KDENGIFQKVIRKGFGEVPQKGSTVSVIYKGMLLDGTIFDQSSLSGAPLSFRVGTGEIIE  
GWDKVVATMKKGEKRLVVIPPELAYGSSGIAGVIPADAYLVFEMELTSIKP\*

>SPSA8\_v1\_740004|ID:41146322| CMP/dCMP deaminase, zinc-binding protein [Spirochaetes Bin 1 SA-8]  
MSDAVYRRPSWDEYFMEVANAIKCRATCDRGRSGCVIARDNQILATGYVGAPSGPLPHCDE  
VGHQLKKLIHEDGSITQHCVRTVHAEQNAICQAARRGVSIEGATLYCRMTPCRTCAMMII  
NCGIIRVVCERRYHGDGAESMTFRQVGIKIEYVFDEVQKYSNQ\*

>SPSA8\_v1\_740005|ID:41146323| conserved protein of unknown function [Spirochaetes Bin 1 SA-8]  
MNIVFLGEIAGKSGVFAVKSTLREIKARYAPDFIIANTDSTTGGAGLGVQHAVYLLKLLGL  
DCLTIGESAYFKLDMTGFYPKAPWVLRPANYPYDNPGRGYRVFQTERGKIAVIVLLGQAG  
FSRVHLENPFHTIDRILERSRDTSSIIVDFHAATTAEKLTFAAYLDGKVS AVIGSHCKA  
LTADARILQKGTAAITDSGRCSILSVGGMDPAAKIREYMTSVRTYMGDGTGLESQGCA  
LTIDENGRATTMESFRIPCKEQIHD\*

>SPSA8\_v1\_740006|ID:41146324| putative Positive regulator of sigma E, RseC/MucC [Spirochaetes Bin 1 SA-8]  
MTELALVKKIDGKMVTVSIEMQEGCAACSNACKANRSALQAYNRNDVNIAEGDEVEIEI  
PGAEQAKSAFWVLGLPLIALFAGYGLGRLLFPTGGGPAVGVVSGALFLVMAIGLFIQKK  
KKYETLPVIVRKFGGEYGV\*

>SPSA8\_v1\_740007|ID:41146325|ppk| Polyphosphate kinase [Spirochaetes Bin 1 SA-8]  
MAEYPPFNRELSWIEFNRLVQEALKPHIPLLERLKFLSIVSSNFDEFFMVRVA AVKSAI  
RRNELSFDVTGITPTALLDQISERVKKIHSVQYTYLMKEIWPSLVKAGLEITSPADWSPH  
ETRFLESYFSENI FVLLTPLRIEEDSFPSVGNLQIHCAFELEAEDGAQRFAITQVPRNTT  
RFIRLPAAEQTPAANENGIQKIRIALLEDVILRFAARLFPGNRVRSSLVFKVTRDADSGV  
DEDRQEDFLAAMEEVLAERHNSTPVRLTISGKSPILSAILKKGLELGEPDTHLPGPIDL  
GGFHELAAEISSLITQEPMISQLLDPWPPIQLHEASETSIWEEIESKDILLHVPYESFD  
TVSRFIEEAATDPDVL SIKMTLYRTSGDSPIIKSLIKAARNRKQVA VVVELKARFDEERN  
ITWASSLEQAGAI VTYGVARLKVHAKAALVVRKKGKDGSIKRYLHLSTGNYNDRTAKLYSD  
FSLFTVNEDLCREASFFFNMLTGYSSVQTLVMAIAPFDMKKRLLALIDREIQRSTAEAP  
GLIFAKLNALADPEIIEALYASQAGVRIQLNVRGICALIPGLPGLSETIEVRSILGRYL  
EHGRMIYFANGGTEEIIYLSSADWLPRNMDRRIELMFPIFDENIRKTCKEILWTFKDTSH  
AYRLLPSGAWEAIKPEGHEKPAGAQEMLYHRVRKLARAIQTPQEQLTVRRRFRSAR\*

>SPSA8\_v1\_740008|ID:41146326| Ppx/GppA phosphatase [Spirochaetes Bin 1 SA-8]  
VAAIDKNGSLKVLDRAAKPSRIGRDTFTMGRISRDAIRETIAILNVFKELLAGYGITPEA  
ATTIGTSALREANRDTFTDRVTLQTGFKIRIIEIEENHLMYLA VQQALQDERKFLSRS  
NSMILEVGGGTTEIMLLQRGKMVSTHSLRIGTLRLDEQIREAGSSRNYLEEYLESNIKTA  
CDLMADELKLDTIKSYIVIGSDARFAAYCLSGTTPGYSVLSREQFIEFARTISAMSL  
CISAYKISYTEAEGLASGLMIEALFLEKTS AENVII PNVSIREGAILAEVSGLDKSIRKE  
LTAQVLASARSLGKRYRYDDIHARNVA AISLEIFDFLSREHGLRDHERLLETA AVLHDI  
GTYIRASGHHKHGEYIVSNSEIFGLNKNDIAIVSNVRYHRHMPPSPMHLNYISLPREDR  
VIVMKLAAILRVADALDRNHTGRALDSSFEKSGERFLIKPSQALDYSMERLSLSAKGDLF  
EDVFGLEPVIV\*

>SPSA8\_v1\_750001|ID:41146327| membrane protein of unknown function [Spirochaetes Bin 1 SA-8]  
MTDKEISLTRAEKISKSLNQVTGIACAFFFGTMTVIVFLGVFFRYVLSAPLNWVEETSR  
LMIWGASLAISIGISQGDHVGLTIILDALKPGTGKKALILAINTLVFAFVVMFVYSWFA  
AVESKTQMTQALGISMFIKLA VPVAMLLSAIQVVLX

>SPSA8\_v1\_750002|ID:41146328| TRAP dicarboxylate transporter, DctP subunit [Spirochaetes Bin 1 SA-8]  
MKRTLILVLAVLMFLPGA VFGQTVLKL AHLNPQQPFVASAAMA AVFKNEVEANSNGQIK  
VEIYPNGVLGKEAETMVQVKSQVVSFISSSGGMAQFYPLIDVTNMPFAFSSYNVGYKVY  
DGPFGKELAADIEKKAGFKVLGFGESGGFFAITNAKKPIKSPADMKGIKLRTMALPLHQA  
IVKALGASPTTVAWAEVYTSLQTGVVDGQMNPIIAMA KQEVQKYITLTNHL YAPYVW  
VMNPKFYSGLTPELQKVVD DAARTAILAGRGLSRIIDASEKGLPALAEKMQVYVPTKAEM



KQFRDAAIPAAKEFMASQYKKDGEMWVDKFFDAIDKAEQELGL\*

>SPSA8\_v1\_750003|ID:41146329| 8-oxoguanine deaminase [Spirochaetes Bin 1 SA-8]  
VILLKDCYTVVTGSREAVRGSPAASAKASATGTLSGIDILIDGSRIVKIGASLSAPEGTQ  
VIDASRHVVMPLVNTHHHFYQTLTRNLPVQNAKLFDWLVYLYDIWKFLDPEAVYWSSM  
LALAEAKTGCSLTDDHHYLYPAGFPDDIPSLQFKAADIGLRFAPTRGSMRSRKKDGGL  
PPDSTVQDEDSILIHSEETIKRFHDPAPDAMRKVALAPCSPFSVSERLMAQSAALARKYG  
AHLHHTLAETSDEDDYCVQVYKRRPLQVMQDCDFIGPDVWYAHGIFFNDEELDILAKTGT  
GVAHCPSSNMRLGSGICRVREMLDRGIKVGLAVDGSASNDSSDMLGEARQALLLQRIRYG  
SAGIKADEVIRVATKGGASILGYEEAGEIREGALADIALFDVIKLEYAGALSDPVAALLF  
SGYNHGVVDHLIVNGKIVVRNARLTAIDEDLIRANAEQAAQRMYRKAGIL\*

>SPSA8\_v1\_750004|ID:41146330| Pyridoxal-5'-phosphate-dependent protein beta subunit [Spirochaetes Bin 1 SA-8]  
MIDLKVIESQRKQNIQRCKEKGILLPTFAQMRDPSKIPESIKKELTGIGLWDVHPRNLFR  
VNWHNEPKKEFGGTYGGVNYFEIPRAITGTKARIIGLVGKWFPTGAHKVGAAYSCLVPELV  
TGRFDPTTKKAVWPSTGNYCRGGAYISRLACPSVAILPAGMSKERFEWLKTMAEEVIAT  
PGCESNVKEIFDKCVELEKTRPDAVIFNQFDQLPNHLWHYAVSGPAMEEVFNTVAGPNDH  
VAGVVLSSGSAGTLGSGSYMKEKFPGTRIGVAEALQCPTILENGYGDHRIEGIGDKHIPW  
IHNMRETDAAGVDDDELPIRFIRLFNEEAGKKILIEAGADPAEVERLPLLGISSVGNLIG  
SIKFAKYELGEDDVVFTMFTDSMAMYQSRLSELNTERGIYTQRDADRDRYDRLQGLSTDN  
LLELSQVDKRRIHNLKYFTWIEQLGKSLPELRAQWNDYRNYWGSLSHQQAELDKLIQEFN  
AEVLG\*

>SPSA8\_v1\_750005|ID:41146331| putative threonine synthase [Spirochaetes Bin 1 SA-8]  
MKWQYRCPQCGAAYPIEPGRYLCDCSKSNKPGMPLQGVLECVWEGTPVLHDDDIPLPVE  
REFFPPVPVGNTPWLWAPTRLREDLGRNKLWLKDDTDCNPSGSYKDRASWLVSFAFKFGIH  
EIALASTGNAASSMACIGAAAGQKITVFLPKSAPVAKRIQVLQYGAELEVDGTYDVAFD  
QSLAYS DATGVL SRNTAYNPLTIEGKKTGSFEIVRDLAIQGGGEPDHVVFVPTGDGVIIAG  
VIKGFEDLVKLGRISKMPKVWAAQAEGSSAIARALAAGSFEFLPSNTIADSISVDVPRNG  
SFALEKLMHHGGAVAVSDKEILDAQVYLSRASGLFAEPSSACAFAGFLKVQHEIPIDDT  
VVIMLTGSGLKDIKSAAA AVGAGL\*

>SPSA8\_v1\_750006|ID:41146332|putative peptidase [Spirochaetes Bin 1 SA-8]  
MDKKLILEKAKQYRDYTAKNLSEIIPGFSTTEKERVALLKKMCCEEAGMEDVHLDGLGS  
LLARVSGSKKKLVFDAHIDTVGVGDPSQWKTTPPHSGLIKDGLVYGRGASDQLGGAASMIT  
AGRILKEMAYNGDYQVWFSFTVLEEDCDGLCWKYLIEEEKFIPDFAVSTEPTSCRLYRGH  
RGRMEIQIDIKGVSCHGSAPERGDSAA YKAARAALALEKLN AELQPDDDGFLGKGTIVVS  
QIKVHGPSQCAVPDQAMLYCDRRLTWGEDDKLAIQVEDALKKAGVDNFTVHMPEYSQPA  
YTGKLYKQELYFPTWKIPADHVLVKS GVEAYSELFGKTPVVDK WTFSTNGVAICGRHKIP  
VIGFGPGDEAQAHA NEITRIDDLEIAAAFYAALPYMLEKQA\*

>SPSA8\_v1\_750007|ID:41146333|ssnA| putative chlorohydrolase/aminohydrolase [Spirochaetes Bin 1 SA-8]  
MILFENVRLLSFNPPAVSEEMDLAAYGPDEGGEKAGTIAAIGKNLAAVYPEATVAGKGGY  
LSPGLVCSHTHLYSALARGMEVAIKPSKDF AQQLKHLWWRLDRAIDTPILEASALAGCAD  
ALSAGVTSLVDHHAGPECIEGSLSIIREAYEKV GIRGLLCYETTDRNGMEQARLGVQENI  
RFAKEIDAMRKAGKRPLVDAAIGGHAGFTVGDATLEALAEA VQGTGRGIHIHLAEDKYDA  
VDSRHRFGLDLIERMDRAGVLSPKSIIGHGVWLTPSEVEIMNERDVFLAHNARSNMNNAV  
GYNALLTSHKNVVLGTDGMGADM LEEFKFAVFRHRESQGPWWPDNFLVCMDRGNRILERY  
FGSDFSNSTAEGFAFGKLA V GAPADLVLDYDPPTPISANNIAGHLAFGMSSRSVRTVAV  
AGQLRIQDRTPLFDAEKIQAYAREQARRLWKNMEGR\*

>SPSA8\_v1\_760001|ID:41146334| ABC-type transporter, integral membrane subunit (fragment) [Spirochaetes Bin 1 SA-8]  
MVFPAAAILIGGASINKANIINVLVGTFLFQGLLTMTPSVINSILQ TDMSEVIRMIVSN  
GMILYALTRKTKVTK\*

>SPSA8\_v1\_760002|ID:41146335| ABC-type transporter, integral membrane subunit [Spirochaetes Bin 1 SA-8]  
MSAHKKSFTKFLSEYAVVLIFVVITLAAIAPSGLSIKYIVQE VITRLGRNSFLVIALLLP  
IYAGMGLNFAMTLGAMAGQIGLIFAVDWGVAGWQGLVFALLVGLPISILLGWITGKVMNK  
AKGREMVTGYILAFFINGIYQFFVLYMMG SVIPMRNPAIVLSR GYGVRNTLNLESVRQSL  
DSILMLRLGGFAVPIVTFVVIIGLLCVFIVWFKKTKL GQDMRAV GQDMAVADAAGIPVEKT

RIIAILISTALACAGQIIFLQNMGMATYNAHDQTGFFAVAAILVGGASVTHANIPNVFI  
GVILLHAMFIVTPMAGQRLFGSAMIGEYFRQFIGYGVIALSLVLYAWKNRKAIEDARSGL  
RQGQPVQKEQNDKGGKA\*

>SPSA8\_v1\_760003|ID:41146336| conserved protein of unknown function [Spirochaetes Bin 1 SA-8]  
MNLAQTLKSKKFIIRALLVAAYILLGILMVYSGKRHTILIDNKDAEDGSYQAIDGMSVQV  
DNLEAAEYYAGDRDKAVVKGQKHVIRIELFNEEKKIEKSFTVPFGNEMLILSVPKLVNNI  
EPFIEPFTALMEQNSQVEAQTDPDQQHFGSDMSGEQIDMTAENAQQ\*

>SPSA8\_v1\_760004|ID:41146337| CoA-disulfide reductase [Spirochaetes Bin 1 SA-8]  
MARYLVVGGVAGGASTAARLRRMNEQAEIILFERGSHISYANCGLPYYAGQTIQERDRLF  
VMTPEKFHAWLNVDRVVRTEVTAIDRAAKSVLVKALDSGREYRESYDFLVLSPGADPIKP  
PIPGISQEGIFTLRSVTDIDSIKEYIDTKRPERAIVVGGGFIGLEMAENLHARGAFVTIV  
EALDQVMNPIDFEMAALVHQHLKSKNVELYLGSAVQKFEKRGSRIVVFLSDGTELDADMI  
VLSIGVRPEGTLAKNAGLATS PNGAILVNESLQTADPTIFALGDAVAFPHILGMAMPVP  
LAGPANKQARVVADNIVKGAGTRVWKGAGTSAIAKVFDTAAAAGVPEKLLKKNIPVRS  
IITHGGSHAGYYPGSQPLTIKTIFSSENGQILGAQVVGVDGVDKRIDLLAEQIRRKAHIS  
ELAEIEHAYAPPFSSAKDPVNIAGMVAENLLAGMTRLIAWHEVEAFQKQGAFFLDVVRTQD  
EFSLGTIPGAVNIPLDNLRSSLTEIPKDRFVVAFCGVGLRGYLAERILRQNGWTEVANLS  
GGYKTWEIATEPQSHKGVYHRGLANVQMNVA GRKEDLVHTTFAEGSGMPEQLANRKDTV  
RVDACGLQCPGIMRLKAEIDRLPEGGRIISASDPGFARDVASWCRVTHNLLVSLEESK  
GIYTAVVEKSAMQAKMLSAMPGASAQGAPMVQYSPEGATIIVFSDDLKALASFLVLANGA  
AAAGKKVTMFFTFWGLSVLKRPNPPHIVKDFMGRMFSFMLPKNPASLNLKMNFAAGAGRI  
MMKSRMKAKNVDMEQMIESARKAGVRLIACQMSMDIMGVMKEELLDGVEIGGVATYMEA  
ASESGVNLFI\*

>SPSA8\_v1\_760005|ID:41146338| putative Mur ligase middle domain protein [Spirochaetes Bin 1 SA-8]  
MLFLLIELFFCRPTDGLNCPFRPGVKSMTMSALPLIPCLTLMILLGVSEALHRKRLA  
KIPIRILVNGTRGKSTVTRLIAAGLRGARQHGS SDGQSRTIRTIAKTTGTEARQILPDGS  
EPPVARKGPARISEQIAFVKNAAEAKADAI VVECMAVTPENQRVFEQHLNRSTIGVLTNI  
RLDHTDVMGQDEFIEAQTALAL SIPERAVYIANPGEFEDFFRAECKKRGRTRFISVNPEVIP  
DHYTAKFSYPMFKENLAAALAVLKHC GIDEETAIERMSQARADPGVVPVFTMVL DGETMV  
AVNAFAANDAESTLAFWREFGQPLIKAPQNRTDDIQESGGMQNADVVA ILNHRSDRPF  
IRELWDVVSRLPVQKVLFCGDLQSEALRFARQHPAASETDSGTKRQTHPLPELVCCGCA  
PRDILKLA VKDRQPETTTLIFMAGNMKGAGMKLTQFICDAAEAKQERKIP\*

>SPSA8\_v1\_760006|ID:41146339|capC| Capsule biosynthesis protein CapC [Spirochaetes Bin 1 SA-8]  
MIPESIALSVVFGFFLTEL TGFLPGGLVVPGYLALFLDHPSRIAATLLAAGLTLACVRL  
SRYLVLFGRRRFMAYVLTGMSLLWLFDLLAPFVLP SIALPQGLDVRAIGLIVPGLIANDA  
ARQGLPRTL TGLAIVTLTVRLALFLLQ\*

>SPSA8\_v1\_760007|ID:41146340| conserved exported protein of unknown function [Spirochaetes Bin 1 SA-8]  
MKNQKFSIFIAASLLTLLASCLLVTSATVMAPHPRQFEMKKAELMIRYTA AIAEQRGGI  
DLALDPNKTGLIGLENSPLTTTAGDLT SKRTSLNPDFAALVVRQFNELGIAKGDRVAIGA  
SGSFPGILLAVLAACSTLDVEPVMILSIGASQFGANIPGFSTVEI IKILKAKGLPVAEPV  
AVSPGGEHDSGLGGLYVEGPVDDL VRLAHGAGYPVIETPSLAANIRTRFDLYTERGPVKA  
FINIGGADANFGTISETLTLGNGIVKNHRVKTSSPERGLVLEFLDRGVPVINFLNIKGLA  
QKSGIPLDPVFPFPPGSSEVYFVTAPSKPIAALGLAAAAVFLVLAKLTLPGKSREKTLPA  
KG\*

>SPSA8\_v1\_760008|ID:41146341| leucyl-tRNA synthetase (fragment) [Spirochaetes Bin 1 SA-8]  
MAKYPFESIEKKWQARWEKDKTFKAHEDPSFPKEKRQYVLDMPYPSGAGLHVGHPEGYT  
ATDIYCRYLRMQGYNVLHPMGFADFGLPAENYAIQTGTHPEITTRANIERFRSQIKALGF  
SYDWDREVSTCTPDYYKWTQWIFLQLFKRGLAYEAEMPINWCPSCKTGLANEEVKDGLCD  
RCHTKVTRKRIRQWVLRITKYADRLLLEGLDQLDWPEXX

>SPSA8\_v1\_770001|ID:41146342| AAA ATPase (fragment) [Spirochaetes Bin 1 SA-8]  
MYLDYYQLTKEPFYITPDPEFLF LSESHKQAMANTVYGIGMKKGLILIGDIGVGKTMVA  
QSLLA KSDTEYLKTVYIDTPDVTFTELLHTVCQRLGLLTS GNTSEMVN TLHX

>SPSA8\_v1\_770002|ID:41146343| protein of unknown function [Spirochaetes Bin 1 SA-8]  
MPHVKKITRDYGRFWPDL SFFCFLSFLFLNIPVIAGTIDL PKTGQSTCSNATGNPIGC

DNTGQDGDYRAGIAWPVPRFDIDISGACITDNL TGLMWSRYAWNPPITLPTSWASSVLNP  
PTAFYACGFSWRLPNINELQSLINFEKPNNVQWLASQGFLFLNMFPIKYWSSTSATDNP  
KSNAWYINMVDGSIKDSKSLATYFIWPVRGTSNPEENAPVGGQIAETGQASIQASYDDAYY  
AITPGLNVGVPWPEPRFTITYCDATGQCPDQDADCAEASNIVTDNL TGLVWTADANLQ  
GLTTWGNALS FVQGVTTTCGYGDWRLPNTRELFSLIDRSQCEPALPADNPFIIHQYGADDL  
YWASTSYANYPDRAWAIDMRD GALGPWAKTNTAFVWPVRGGKTKPYILTIK KLGNGQGT  
TADGLSCSGKTCKGEYQS YEVSVTATPQTSSVFMGWDGDACSGSLDTTCRISVTANMKV  
TATFRSKVKISVAPQSLNFKNLKQNISSPLSIVITNKGVENLTISTLEITEDTESIFKI  
MSDPADCAVIASDASCTVTITATSPDYDTKTAKLKIISNDPKNQTTVVRLKAKVKPPKIT  
RKPSIVSFGKVAVGTPVNKT VTLTNKGITDLVIGAITIAGDHPADFSPLATDTCSGATLV  
TGGTCTVTFTFPSTA EKRRAILQIPSNPNPKRSLLSITVKGAGV\*

>SPSA8\_v1\_770003|ID:41146344| protein of unknown function [Spirochaetes Bin 1 SA-8]  
VIGNTERVKTQLIALSSQLKPN AELNIGFSFCSDHTAISYEQYYMLIRGM\*

>SPSA8\_v1\_770004|ID:41146345| protein of unknown function [Spirochaetes Bin 1 SA-8]  
MKKIAVDIDNILWDFSPVFWERLRKINPAIIPPTTWNRWDFWHTYVTTKQLYGAIKEIHL  
EQEKFKPFDDAPAFLLALREMGFYIIIASHREQGTFEPTKRWLSIHDLVYDEIHLNDKS  
VLFSDLCAVVDDSPSVLDKAKAAGIIRAGLRKPWNEDTGHPLFDLPEVLTYLESACNIA  
HSL\*

>SPSA8\_v1\_770005|ID:41146346| putative Outer membrane efflux protein [Spirochaetes Bin 1 SA-8]  
MTHFLRVFLISLIALPVIFFP SIPVSADRLT LSDGIRIVTENNMLVKIKKQDELIAESDT  
LVARSGLLPRVYSTYSQNYTDKQQGTQIRGQSVYTQQQDFYTFSLRAQQLWDFKGTLSL  
YEASKKIQETRQLEYKRTQNFMA LSFALGYFDLLESEKMITVAEKETEMLDAHRAMAENL  
YNEG VITKNDLLQAEVRLSDARQKLLTAKNIRKITASRLNTMLSRPLSSSLDAEEVARPV  
VVPTVDLEKAMEKA EKDRYEIRMVDTALDAIASEATAKKSEYYPRFFVEGGYNYLRNKYA  
LYDGWSVVMGGMSINLFSGGATQAGLDKIKRERDKLIIERKKLIEDIRYEVEYYLELIN  
AREKVKVTKDASSQAEENLRINKVKYAE GEGKATDVIDAITLLTGAETNHYSQYEMFRA  
EANLMYAMGRDLVEVYK\*

>SPSA8\_v1\_770006|ID:41146347| Secretion protein HlyD family protein [Spirochaetes Bin 1 SA-8]  
MQWAVTLWRCINNRMEESLNA VRNEK KKKPLIMGTIVGCILILIVTG YLYRATR VSTD  
DAFVEGRVHTIASKIAGTVTAVL VTDNQAVKKG DILVEIDEVDYDIRVKEATTALDTEKT  
RLIEAESRRDAAIKQVEEVRAA INAAARATEELQEAHARQARIDMKRAENLFRNEAISRER  
FEKAKTALDVAEAQLRASREQVKRLEASLGAQVSMVKQAEAVVRTQSAAIKQRKTLVEAA  
DLNKS YTKITAPADGYVT KKSVEVGNQVHTGQPLLA VVALDDLWVVANYKETQLEKIKPG  
QKVKIVVDAYPGKKFGGEVESIMAGTGATFSLFP PENATGN YVKVVQRIPVKIRLDNEAK  
KENILRIGMSVPTVYVR\*

>SPSA8\_v1\_770007|ID:41146348| Drug resistance transporter, EmrB/QacA subfamily [Spirochaetes Bin 1 SA-8]  
MNRWLVA VTMPLPTLIEIIDMSV VNVALDHIRGSL SAGIDEATWAITMYLVSNAIIPIT  
GWLSRYFGRKVYLNFSIALFTISSLLCGLAWN IQSLIIFRVFQGLGGGALQPISQAILLE  
TFPPRLHGVAMAVFGIGIMFGPIVGPVLGGVITDYWSWHWIFFINIPFGIISIFMTMLVI  
KDPPYMKKTRMKLDYPGLLLVALGLGCLQVILDQGQREDWFESSMISWLTIISSVSLTLF  
LIVESRTQEPVIDLKVFKNISFSTGNVVMFFAFFNLFSGSIVLLPIYLQTLMGYSATLAGL  
VLGPGGFSSIALAIAGRLVTKVNP KWLLVFGISTAALSTYMMSLFNLNADFITVMWPRI  
ILGLGMGFIFIPLTNLTL SIIISREGMGNATALFNLIRNLGGSFGIAFVTTVLARRAQFHQ  
SHLVSHVTPFDLTYQIAVEK LKAFFHMLGFTESMSKMAADGSIYRTL IKAQATMIAFNDAF  
WLMSIMLIATLPLIFLKRPRHGEHIETIH\*

>SPSA8\_v1\_770008|ID:41146349| protein of unknown function [Spirochaetes Bin 1 SA-8]  
MVTGIGSFPFTDVDEALDIIFATCPEIPFWPQLPKR APYENMYIPFLEAVPCVVIHENEG  
TAFMNTESVEGIEEFYEDVQNGTIEAFRISEK VAPGFSRFLERLDERRREV KFIKSQITG  
PFSMGLGLKDENGKPIIYNYGYFDI IKKAIHMKAQWMVATIKAHFPEKGIIIFDEPYMV  
SFGSAYV SISKEEAIRLFDEV LGGIPAXX

>SPSA8\_v1\_780001|ID:41146350| Ribose-5-phosphate isomerase B (fragment) [Spirochaetes Bin 1 SA-8]  
MDSKIRLAIASDLSGFPLKKEIVKHLQANHP EIEVLDFGIESEDAPQPYFMQAPKVAKAI  
QEGRADKGIAICGTGQGM AIVCNKHKXX

>SPSA8\_v1\_780002|ID:41146351| putative transketolase C-terminal section [Spirochaetes Bin 1 SA-8]

MAEQKEMRAVYAETLTALADQGLEIVVVEADLMRANGTGAFACKYPARTVNVGVAEANMV  
GIASGLSAAGKIPFAATFACFASRRAYDQFFLSANYAGLNVKLVGSDPGITAGFNGGTHM  
PFEDLALMRAVPKLAITEPSDPASLAAILKLAETYGCFYIRLQRKPANMLYSAEEKFEL  
GKAKVLKKGKDITLIALGAVMVQEAMRAAANLAAQGIEAAVIDALWLAPLDEATILEHCA  
FGKVITCENHRVTGGLGSAVAELIAEKAPGTRLARIGVGKDSFGEVGTDPDWLADHFALTA  
PHIEKAALSLLGR\*

>SPSA8\_v1\_780003|ID:41146352| putative transketolase N-terminal section [Spirochaetes Bin 1 SA-8]  
MNKEELKELQETAKRIRSLTIEEIGHLGVGHIGGAMSIVDILTLLYFRHMNVDPANPRKA  
DRDILVLSKGHAGPALYATLAEKGFPTSWLLTLNQQGTTLLPSHCDRQKTPGIDMTTGS  
LQGISAAVGYATGLQMDHTPATVYCIIGDGESNEGQVWEAAMFAAHRKLGNI AFADWNG  
MQIDGLTKDVMNMEDIVAKWKAFGWEAEMVDGHDFAEMDA AISRAKARRTQEGARPTMIV  
LKTIKGKGCSFCEGLVTNHNMNYGIEQTKAALGTTKARLIPALLNE\*

>SPSA8\_v1\_780004|ID:41146353| conserved exported protein of unknown function [Spirochaetes Bin 1 SA-8]  
MHKKAKKPALIAAWFGFAVLGCSAPGNDQVFLPIGDARPPVLTVNQVDSGLLELDFSE  
DVAMVADSFVFPKGIQVNPTVDGKRIQVAFSPRLDPGTACTLSGEAEDRAGNRLKFLIS  
FSGYNEHPARLRLNEVQPGKNSSASNPHRDYIEFLVLENGNLGGATVEWASSVKSRYRQF  
PAAEVRAGECVILHCAPEGIPAERDEIGSDCGLSGGIDASLSGRDFWTSVGGLPDSTGVI  
AVRMREKDPACDGLFYADTDKAGALEIKAFGGLPKMLADANIWPSAGGAPAWEDAFIWK  
STSRPLHRTEGAANGKSAWYVGDAGSQSPGEEAPREAVSKSAKKVNNKKTSP\*

>SPSA8\_v1\_780005|ID:41146354|Thioredoxin-1 [Spirochaetes Bin 1 SA-8]  
MSAEVTLTKENFNTEVIESPIPVLVDFWAEWCMPCRMIAPSVEQLAETYKGGKIKVGKVVN  
DDESEIASQFGIISIPTLIVFKEGQAVKQKVGAIKHEIENLFKGL\*

>SPSA8\_v1\_780006|ID:41146355| conserved membrane protein of unknown function [Spirochaetes Bin 1 SA-8]  
MEKAGHTWTFARIGGIDQVVLKKGDDIEHLAELDPKLWAILSAPTRQAKYAETYALLDTD  
HDGKVRIPDILDAIAWLKNIMVSLDVLFDKDGLETEKEIADETLIKAFKEACEILKAQK  
LAQNGQSLILNSGLAAAIALQKNQKFNQDGVVIKNSTDESAAASFIDSLVCLGYAAQDA  
SGEMGLDKANLDAFLADAEAMLAWRAKISENPELLXCGDKTDAAVELFYAIKPAVDDFFK  
RCQIFALSTSDTALRDIDTAISMVLAGNQEEQDKMPLPLALPNREIVLHLDKPMPLAFMK  
TVTEFFAILPSSLAAGKEIDFASWQEISRRISAYAEWKSANPASRLNDVEDALLVEYLKP  
MYQNAVIALLEQDLARXEYAQSFADLRKLIILKRDFLGVLQNFVNLD AFYRDKNAV FQSG  
RLYIDGRELELCMDVVNPGAHGAMAVMSSMYLLYCDLVSKEGKKKSIVAALTTGGDADNIF  
AGRNGVFIDNESKDWDAVITKVVVQPISIREAFFSPYKVVVRTLEEAAARRAANAESANL  
AKLKTGAEQTVATVGKVDKPDANLAKKIDVGTVA AIGVALGSIGAMITGLLGIFVGMG  
IWMPLGIIGVFILISGSMILAYMKLRRRNIGPLLNAEGWAVNGKLNKINVPFGGSLTHLG  
AIPLGSARLLMDPFKPKPWLLYLLVLAIVLVAA YFLGWLDGILVALSIRK\*

>SPSA8\_v1\_780007|ID:41146356| Major facilitator superfamily MFS\_1 [Spirochaetes Bin 1 SA-8]  
MKTKKASLPLFSVVFMDMVGFGLIPLIPDYIAKFGGSPALAGILQASYAIGQFFAAPI  
VGRLSDKYGRKPLFLFSIGGTFFSLLLGFAPSLTFLFLSRILDGLTGGNITVAQSYIVD  
ITDNKNRAKGLGLIGMAFGLGFIIGPLFGGLLSQFGIAPAFVAAGIAFTNLLLITFVLP  
ESLTDERKEEIAKNPRAFSKLLMETLKRRTGTPVLHMTIISFAFVLFESMFAIFAST  
ALGLGTSTRGLLLAYVGLLVA FVQGGLVGFLAKKFDERKLALVGISMAAFGLLFYALSPS  
LVVLVIALPLSIGSGIGSTMLRLLTKSVPRESSGTLGIASSVESLTRIAGPLAGGAL  
LGLLGPAPGLVASLLAAWTSWYGFRFLIKEDCLAEGAVSCSEPI\*

>SPSA8\_v1\_780008|ID:41146357| protein of unknown function [Spirochaetes Bin 1 SA-8]  
MSQTPDVLDDLQEWMLVMKHSMHGFIRYSKDTGLSMSQFGALFQIHRSKICGVTDIGTD  
LGVSSAAASQMLDRLVQQQLVERIEXX

>SPSA8\_v1\_790001|ID:41146358| protein of unknown function [Spirochaetes Bin 1 SA-8]  
MDTTAQLIILRLENSLRARKYSPATRRRYIGFCQRLFQRYPTMEPAELGTVQLEAFLADL  
ERQGRSASCINQAISAFSYLWVNILALPFPITARPRADQVLPRVLSPGQVESLIRGAKNP  
RDRLAFALAYSAGLRVSEVAKLRIHDIDRQRMTMLVRQKGKDRILPLSRRVSAMLESW  
LDXX

>SPSA8\_v1\_790002|ID:41146359| protein of unknown function [Spirochaetes Bin 1 SA-8]  
MMTNNRKSLSYFPVDTMFSIPMRKLTMHYGPGEIGIVILILQMIYHEGYAITWDDCCL  
FCRENNIDKKTVEILRFCLKQGIFDRTLYREKKILSSAEIQKQWLKICQQSKRKGMSIE

HGVSLLDQETDRFAKSSSGKTPKDSGNLPENSGRLPENSAQRKEKKIKEKKIKENKNKKN  
KSEEDRSEEKTRAEQAPELWPALSVLPKASDPGLDDMKARFQRIIREKERQEHLGNIQ  
QIAAGQPPGPKPDLEAMKARFHKLIREKNLQEYSGKTPQKAAGQPP\*

>SPSA8\_v1\_790003|ID:41146360| protein of unknown function [Spirochaetes Bin 1 SA-8]  
MTTTTAGVEMNTRETFLKFHYAHPELYLALRKEGYRAARSGKTHIEINELAQLAALQGHW  
ELLDLHETCLKHYKALLAADPLLWKLRLREN\*

>SPSA8\_v1\_790004|ID:41146361| protein of unknown function [Spirochaetes Bin 1 SA-8]  
MKLLHAADLHARREGANDFNNTAIKHMESIAKTQNADLIALSGDIWDGPTQNSAGTLFPDF  
VEAIRSLADCAPVAMIYGTPSHDVEGSLEIFETLASKHGIRILRPGISYILKDGTIQELS  
GDNHENAQLLLTGIPEPSRKWLLAENRTDSELHAQEILKTLCLALGCMRERYPGLPFVVL  
AHGQTEGSLTAAGXRLDXDRNLHFSKESLKTLHADYIALGDIHEPQHIEGTRAWYAGSVY  
PLTYGETHTPGCNLVTIEDAGKPVAVERISFPIPIRKHIISHAACALEIPQYRGERIWYE  
IRGSRSETALIDTQEVLSRLIGHGADPASRVTIDLTPETAVRSGEIRKKNNGIIEKLVVA  
ECSGEKLSASLLDKANQLARETSLKNQAPADASYRVDRLILRGAIGIWMVSHKDEIDL  
ASCGPSVLALIGKNGAGKTTILENMHPWPRLLTRSGALKTHFRLADSFRLDLYMTETLSGW  
KYRFLITIRADIPTGAMECWIFRDTGKGWEPLPGINGRLEPYEAWISRLFGSLSLYQRTA  
FTSQKPTLTCPLANATKGEKTLFSELCGISWLETYRLEAKAKTEAAAREIERLEPRHS  
MLKDAWEQEASIKRELCEAERLNELTQTEEALKKDLNAQKEIRNQRELLAEREKLVRO  
RERAFNAIMSLKARQREHEQVIDVHRASLRKKNDAAILARADSLTREKEQLIHTIAQLK  
EEERNRYREYSRKLEQYAAERESILGELARIRESTLDAESLSQKDTLSRLQDSSCPTC  
GQQLPSDILATQEKTRGRLTGEIAELETRLGSAARKHDLETTLKNLSAPGYPEVREILE  
EHDLAQVKEELAQLNTQAAQETIRIADVAEGTITQARQELLRIENEIGSQSDEADRCTEK  
LAQLPKKETLQQAENQLEQLAGKLSDTTMEKVRTQTRREQLEQSLAATMRQAEYQRLTQ  
TLADLTRDLCEWAQLERATGKDGIALELDALAPSIAQTATRLLIASGNQGSIAIQTQKL  
SGSGSRLHAMEDFSILYIAQDGTEQDISTLSGGEAVWIRKAIYDAFEAIRSNGSGFRMET  
VIIDEADGSLDPESRLRYMRMIEASHREAGRYQTIIVTHSLELQSMATRCIHVAELKASS  
PPKPAAQLGLTA\*

>SPSA8\_v1\_790005|ID:41146362| protein of unknown function [Spirochaetes Bin 1 SA-8]  
MTRQQALEFISRYPNALSIVKASHLEELSPLLEVSIEAISCRKEEFHCLPGNTYMPRKET  
IDKFGQAAEISFNPLAESTRREGDCYIGKSQAMVLGPDGKQIFGDICEYEYDVAVRHEIE  
IIEDLHAKFPRFHSQGLNEDKARLAYLALRKTARQRANTGARTRAILSILGMQTGFKDL  
FRPEDKPDATVTFLEFSRIINAMNEMVLNRMLVNLTAPAAMLFGPRKQQTLLPHDDLPEP  
EPQEAIDAHLILEEPQQPLAMPPMDPPDTISKEKEIQLLRNINVHLQTGQLDEKIKTAC  
SQALERHGDDEAYLRAILERLKMMLGKPKQDREGREP\*

>SPSA8\_v1\_790006|ID:41146363| conserved protein of unknown function [Spirochaetes Bin 1 SA-8]  
MKTLENHEEKMNPGNRNEPMLLDVQNAKLLNLSRSYLYRETRARRIPHIKIGSRILFRT  
TDLQAWLEKQYIDSDSNCA\*

>SPSA8\_v1\_790007|ID:41146364| Endonuclease/exonuclease/phosphatase family protein (fragment) [Spirochaetes Bin 1 SA-8]  
LPLLLAQISTPDNPYQAVISPRLGRTASKEQYAFIYRTDLFEPLGEASVLPDPQDLFERE  
PFMAMFKVKEGNLDLILVDIHTKPEDAAREISLLPKVMQYAAEKYQEPDILCLGDYNADG  
SYFNETAYQEIFPPQNYLQLIPNSADTTVGSASLTYDRMTATSAMASDMTGTWGIYDFSS  
LPCVMTNGINPKTISDHYPWIEAYTNRDTE\*

>SPSA8\_v1\_800001|ID:41146365| Fumarate hydratase class I anaerobic (fragment) [Spirochaetes Bin 1 SA-8]  
MLEEKNTGDNLPAGVDIRSVPGNEYRFLFAAKGGGSTRSLSMESPAILKEERLKSVA  
ERIKKLGAAAGCPPYTIGMVLGGTSPSQTMYALELAVYGLLDKLPVEMERTATIFADLLP  
DGKTPGKTSASAQHSFLPGTGVRSEWEEILYELGVQTGIGAQQWGRHLALKTRAIRFSR  
HAANLPLAIGISCSAHRKARVMNEQGWFLKLESDPARFLPASMDVLPGAVEIDLDTAQ  
DQWLEKLRSLSSGTPVLLSGTVTIARDAAHARLETMAKSGVPIPDYFIEHPVIFYAGPTEP  
LPGRPSGSFGPTTASRMDSYLEFFMEKGASLVTIAKGNRGEEAQHAIRKARGVYLAAGG  
AAALTAREHVLESRIVDFADLRMEAVRLVRLARLPVMVIDASGRSLYA\*

>SPSA8\_v1\_800002|ID:41146366| Major facilitator superfamily MFS\_1 [Spirochaetes Bin 1 SA-8]  
MIKTAFRETQTSIRFGISYVMLFAIYGISSPYLQLMIRRLGYAPSAVGIFLGLFELIGIT  
GPVILARNADSRGAYKPYLIASGLMILAGLAILVPRIPVITIISLSLSLGLKTPVPL

DAALFKAIDITAPQESRGLNYGLLRSLGSAGFVIVTLIVQSIRGFDTASSQTMALYMGIL  
TAIYLGLLFLPETGIIQQKAHKERLSFAWIDSVFIIIGILVIALGRLAMA AVGSFFSLYL  
TEELGWHA V GAMWAISATSEIPFIALS WKFIKKNSPMTAIAIASSAIVVRLMIYALFPSP  
AGAIAGQLLHSLCYGLFQPA AIVFVSLKTPPEKRATGMAIFMFGFVGLPAFVGSALGGRI  
VELLGYRGLFGGYTLFAVASLLVFYKNRKLTAVK\*

>SPSA8\_v1\_800003|ID:41146367| NUDIX hydrolase [Spirochaetes Bin 1 SA-8]  
MVAGDGS GSILWQTVAKREAYRGHIFTVFEKTSRGPDGRQGTFSVLESRDWAVVVPLVRS  
EKGDSFLMVRQYRHGADAISLEFPGGVIEPDEAPILAAQRELAETGWVSNDVMQVADV  
PNPAIQSNHFHIFLALNPAPA VDRNLDEHEIVDAVLVPVSEVWNMMGEGEYRHALMATAL  
FMAEKALLKLGKIAS\*

>SPSA8\_v1\_800004|ID:41146368| conserved protein of unknown function [Spirochaetes Bin 1 SA-8]  
MEFEIPDFFKTLESSITVCDKNYILYMNDKAVASYRDAGGEALLGQDIRICHRQASLDK  
MKAIMETGIPNAYTISKNGIRKLIYQAPWRNGGSIAGIVEFSIPIPEMPHYVRS\*

>SPSA8\_v1\_800005|ID:41146369|ykcC| Uncharacterized glycosyltransferase YkcC [Spirochaetes Bin 1 SA-8]  
MLISVVIPVLNEKENISALTDRLTEILSRYDAFEIIFIDGSTDGSIELLRSLVERKRV  
GYLSLSRNFHGHQNALRAGITAAQGDCVIMMDGDFQHPPEAIPLFIDKYLEGFDIVSGVRD  
DHSTSSETPGFSKQISSRLFYRIINSLSDVRIQPGAADFRLISRQACSILLGMKEQNLFL  
RGILPWTGLPQTEIRYQTGKRKHGTTKYSFSKMLNLAMDGITSFSIKPLRLTSFLGAVIS  
ILGFVYAVYALCMRLFTTKTIEGWTSLLISVLLIGGIQLLSIGILGEYVGKTFMETKGRP  
HYIRESRLPLQNAEPELKAGQRLDKEEQ\*

>SPSA8\_v1\_800006|ID:41146370| putative Small multidrug resistance protein [Spirochaetes Bin 1 SA-8]  
VNICLPLFGIAASALAQIFLKYAARFEVRETQWFLCMGASLVSYGASFFLYAAMLRTDRL  
SRISPIMASAVAILVVLGASALFGEQISIRRALGIAFGLAALYLLSS\*

>SPSA8\_v1\_800007|ID:41146371| membrane protein of unknown function [Spirochaetes Bin 1 SA-8]  
VVSLHGSEPGFLRRLVLSVCRHAENAGSQNQPDHGQRGRHTGCACRICALRRTDIDQAG  
AGNRLRACRALSVIKLNRTKSMLETESKRQTAGAAIFTVLSLFLVYAFMLSRFNL SMLFS  
DTTLTGGDSASWYQVLHTLKNFLPHGRLFSYSNSNFFGYLEGQHYFPLPFLAAA VAGFF  
MPLTVALKLATVAGGFGLPLTSFAAA YAIQKNSKRSKKTALFSGILSACGSLVFLFNESY  
TIFGGNWLSTFAGEFCYSWAIALLPLFAASVILDHLKKRSGILSGILLGILGLSHLFVFM  
PAFFLPFFPVFRLFFELIRGIKKENPEAQQEK NALLMRVLT TYGIAFLLMAFWMLPMIAT  
RKWAQPISMIWHFASFREFARQTLAIVWLPAILMFLAASFGRKKIAAKRRASEAREMEAA  
PETSKTDAQYLPRFFSYAVAACAFLFLAAPGLGMPDIRFVPTAVIFSLFGISLLTANPVL  
RVAERLVWRFSSAERSASAPSRSGTSGIPALLIAEIAVVLASCGIALTTGRNAPSWFVWN  
YSGYEAQKEWQFINKLRDITYKGSLYNGRFLWEKQDQRDNRDFGSEAFENLYLFTGHPSS  
EGIHYGSSFMARAATYLQSSYSLHPVDPEAERIYSVIDPDSWTVRFAMLN VHYIIVHSDE  
MKKLFSEHPSFALDMEAGKFAVYRFKAYQGHYVQALPADALSIVKSGPGGFKTDYRFFR  
DYELIRFPFISNEFADSQLVNSLKG GAREYSDYDSYRAALLPQALIYG YEPKTVMGISAE  
HIDNFSISFHTEKPGQPHLISLSYAPGWKSLAGEKIYPVSPGFMLIVPTTQEVRI SYERT  
MWEWLGIFLTL SAIPLALRIRTRSGKSRNXX

>SPSA8\_v1\_810001|ID:41146372| protein of unknown function [Spirochaetes Bin 1 SA-8]  
LAQGPYFAIKVTPAIHHTMGGVKIDSSAQV LREDGTAIAGLFAAGEVTGGVHGGNRLGGN  
ALADIVTFGRIAGENAAARAKAK\*

>SPSA8\_v1\_810002|ID:41146373| conserved protein of unknown function [Spirochaetes Bin 1 SA-8]  
MAKENNAVRLKRRRLICEVTSLVLEGKLADEIDSIPYAMTNENWETIQCCIHHDRLRLR  
LMSLLGYSTEGMLDVKPLRYAQEALSGKKPDAFPLSLMSAACNGCTKSR YIVTNVCQG  
CLARPCKVNC PKGAVSIINNQSHIDPELCVNCGLCEKSCPFHAIKIPVPCEEVCPVGA I  
QKGEDGIAKIDESKCILCGKCLSACPF GAPVEKSEIVHVLSALIHGKKLIAMVAPAAMVQ  
FPFPPGKFIAALEHFGFSKVM EVAEAA DRVAEAEAREFAERLHENNKVLATSCCPSWVRA  
AGSMGLEQILSDTPSPMLVA AKTAKAQDPDAFTVFIGPCLAKRWEAHRASQNSPLVYAVL  
TSEEVGAMLMAAGIQVNEENEEDLATAGNASVYGRGFAATQGVTA AVKHALSPSAVEVNS  
CIVSGITKDTASQLKKVQESDKPLLIEVMACDGGCINGPCQLTNPKVAGAF LERYKAAAE  
HTTALKSA\*

>SPSA8\_v1\_810003|ID:41146374| conserved protein of unknown function [Spirochaetes Bin 1 SA-8]  
MNQVKVTICVGTACYVLGGAELLGMVDELTA RFGHHVMCEGSPCLGFCKLSRNSKAPFAL

VNEKLLAATPESLLKAVEEALSGVQNG\*

>SPSA8\_v1\_810004|ID:41146375| Stage II sporulation protein E [Spirochaetes Bin 1 SA-8]  
VKPHFIEIGSYQLPKAGQNAAGDVFMSRKIQETDRIISVLS DGLGSGIKAGVLATLTGTL  
AAGCIAANMSINKTAKLIMRSLPVCSEKISYATFTIVDVKGHVDVRIIEYDNPPYLLIR  
QGCEVEPVKTEIQVAKGKKIGSHPKPAILRGSSFKPQLGDRILFFSDGVSQAGMGTKVLP  
IGWGYNGVKEYALNLVRQNPDISARELAHAVVIRAA YHDLGIPKDDITCGVVYFREARRL  
LIVSGPIHQEDDQELASKFKNFPGKKIICGGTTANIIARELKKTIQVSLKVRDLTIPPP  
ACMDSADLITEGIVTLGKVVEYLEQDTKIEQLPENSATMILKHL L DSDIIEFLVGT KINE  
AHQDPTMPVELEIRRNVIKRLKALLEEKLLKQVSIQFI\*

>SPSA8\_v1\_810005|ID:41146376| Fe-S cluster domain protein [Spirochaetes Bin 1 SA-8]  
MDSAQVIYTEL TECQDCYKCLRECPVKAIQIVRGHARVLEDR CIHCGNCVEICPQKAKKV  
RSDLERAKILIRLRQKT VLSLAPS FIAEFSGIPMQKLIAGCKKLGFSHVSETS VGADAVS  
ESVSKTIAEQQPPLMLSSACPAVVQYVDKYLPEMSGFISTACSPMVAHARIKQTLGPGT  
AVVFAGPCIAKKREADASEGAVDVALTFQELRQWFCEEGIDPEDAAVRDEDSFFLNQAQD  
GILYPIEGGMVASIKHLKHS DAHCMTYSGIHQIREAVRGIVDQY LENENNPQNKTLFLE  
MLACEGGCVNGPMVQQSGGTVAKRRLV LSEKEKRT ERGRVLSEPVSVQDIAADLTMPQSI  
RQKPVA AVAVSEEDIKASLASIGKYSRKDELNCSGCGYDSCQAF AAAMFLGKA EKT MCLS  
YTRKLAQKKANALLKAMPSAAVVVDASMHIVECNKPFAELLGTDVMELYALKPSLEGADL  
RKLLPFWEAFEQV LMPESQDIVASDFQCNGKIVHGSVFSIEKGLLAGGLFQDITAPWIQK  
DRVISQARKVMSQNLRTVQKIA YLLGENAAEAE AALTSIIESFQSERSGDSYKSNKE\*

>SPSA8\_v1\_810006|ID:41146377| conserved protein of unknown function [Spirochaetes Bin 1 SA-8]  
MNQSGKTITICMGSSCYARGNVYNIIEIQSWLRQQGLEAEVEVVGTLCEGQCRQGPIVKI  
GATVYQGV TASSISEILAHEFLEVHHG\*

>SPSA8\_v1\_810007|ID:41146378| conserved exported protein of unknown function [Spirochaetes Bin 1 SA-8]  
MTFFLQKLRNSILIAIIAASLTACAGNTTARITQNTLIAAGPRIELKLT PGPFIYEMHT  
LFAHYTVRPQVA VWIETLDGTYIGTIYATEAAVTGKFKMAPKKGRPEALPIWSGRKTGNI  
DAISAPTRAGEKTIYESAAISGLQPGRYVIMLETNRSYDWNKTYTKKNSGVNGQPSVIYR  
AEIDIGSGAGTASLEPIGTGSVDGSDSKIRWGLHGIDTALQLFSSLQVIYRD\*

>SPSA8\_v1\_810008|ID:41146379| Transcriptional regulator, TetR family (fragment) [Spirochaetes Bin 1 SA-8]  
MEERRLSVCLKIMKYYSRGNEMSGIKSEKNSYHHGNLR AKLIELGLEVLEAEGAEALSRLR  
ELAKMAGVSKTAPYRHFKNKEIFLASLADEGRLLYADLLQARGNDPGPVERMGRSYMAF  
AVKHPALYRLMNSSX

>SPSA8\_v1\_820001|ID:41146380| conserved protein of unknown function [Spirochaetes Bin 1 SA-8]  
MPSQIIHILHG VATLQRTIALVGEAGGSTLSREGGILFSVFPKLCPELFPWFCLGCQGP  
DLFYHNQRTRPVALEYG SLLHRHSYGDFSL SLENALKYIPGDNQATPEVAFAIGFLLHP  
FPDRL LHPYIIYKSGAVSNIGAEIVKNAQNHFLE RILDMLFLEWSLGSVPEIVLWSVQK  
DYPAVCSFPQSKLLSRPAREVSVSFRHIIIEAILNTFPKRANEDRNLELRIQNMFQDASH  
FYELTDPGFFKLN SLKNNRLINSILVKNEKQALAI AALLYPFGVTMNADFLNMCQTKWYS  
PCENGFGLSRSISIFRF\*

>SPSA8\_v1\_820002|ID:41146381| putative Alpha/beta hydrolase fold protein [Spirochaetes Bin 1 SA-8]  
MIIVYLAIYFLAVFIFSVVAFYLMFYPSCKSLEFTRANGLEKAEFSQEFLDNPWIDFNI  
PSPHGYSISGNYLVSRTGAPSAPTALFVHGITWTRHGM YKYMQPFFKNGWNVASIDL AGH  
GNTWAPRRYFPSFGY YEKFDVKTAVDFLKT KFPGSALFGVVGESLGAGSVLQYSAISNGA  
IDFVIADCPFASARKELLHHVRKLGFPFFAQHVSLIVAILVRMTKGFSFSDASPEKAVM  
ETATPILLVHGLED RYVPTWMSLHLYNIRKKAGFDAT SLLLVPGARHAKSFM TDPALWEK  
TAFSFISEVKPVEKPVAG\*

>SPSA8\_v1\_820003|ID:41146382| DNA topoisomerase 4 subunit A (modular protein) [Spirochaetes Bin 1 SA-8]  
MAYVKKLFNENFLYYASYVIKDRAIPDLEDGLKPVQRRIMHSLFEMDDGKFHKVANVVGH  
CMKYHPHG DASIGSALVVLANKELFIDKQGNFGNILT GDEASAPRYIECKASSFAKEILY  
NPKTTVYCESYDGRNQEPVHFPAKLPVILLIGAEGIAVGMSTKILPYNPXEVIAEIACL  
QGKA FSLLPDFQGG LMDVSDYQDGNGKVRVR AKFDTS DPKRIVITEIPFGSTTESLIAS  
IEAASRSGQLKIASITDFTTDKIEIEVRLQRGVYTQEVIDALYAFTECEQSISTNCLVIK  
DYKPVVMTVSEIVRYHAGKLLSILRQELEIERGELLDEIHARTLERIFIEERIYKKIETR  
RTQETVLKAVKDGLAPFDREIGREVTREDIERLLKIPIRRISLYDIEKAKNELKQVQARL

AEVESHLAHLVDY AIDFLKAQAKRLEAAWPRKTQILSFSKVDYKEAARRDIAVRYDSATG  
YIGTSVSSGEKVLEVSSFDRILVVRTGLYSIVPVERLFDVQGLLWVTLAEKETVAATT  
LTVIYKMLDSGSPYIKRCVIESWIVGKDYSLIPENAQLLLFSTEADFEFTLSYAIKKRMR  
KASETFRARNFPVKGLKATGVRLAAREVLA VESLGRVVRPSGVIEPELGLDTKVAPEEQG  
QELSEAGSEDKPVAPESPMKLPKATAVSGKAKKSRKKPEPKAGAAGKQLKNDASGGAQA  
GKAPSNNGTQAASKTADKTPKNAKTAKSADGSGSKPSGTTKKKGLKADTAKIDTKQEAKA  
DKEKETSQEGRGKGLLATLARKKAELAGGADSESNKRREK\*

>SPSA8\_v1\_820004|ID:41146383|parE| DNA topoisomerase 4 subunit B [Spirochaetes Bin 1 SA-8]  
VAENRTKSSVIYDESKIKTLSSLEHIRLRTGMYIGRLGDGSDPDDGIYILIKEVIDNSVD  
EFIMGAGDRILVSVKRNVRIRDYGRGIPLGKVIDCVSTINTGAKYNDVDFQFSVGLNGV  
GTKAVNALSRVFRVVSYRDGRLFEAVFERGV LKNQREDSGREGKNGLLVEFEPDPDIFPD  
FSFNLEFLEKRMWNYACLNSGLT VLNGREFKAEHLLDLLASEVGESALYDLGWYKGER  
IEFAFHTNNGYGEHFSFVNGQYTS DGGTHLSAFREGFLKAINIFYQASWKGEDIREGVA  
AAVAIKLKNPLFESQTKNKLGN AEIRPWILQEVKRGVDDFLRRNPQEAKKLQEKILNSEK  
LRTELNIVKKEAKEAAKKIELKIPNLKDC KYHLGDGEKGEVSTIFITEGQSAAGSMVSSR  
DVYTQAI FSLRGKPENMYGKRQTAIYKNEELYNLMMALGIENDIENLRYARIVIATDADY  
DGFHIRNLLTFFLTFEELVTQGR IYILETPLFRVRNKKETRYCYSARERDEATKAMGA  
QAEVTRFKGLGEISPSEFGQFIGKDIRL VKVDIQTLSAVPELLTFYMGKNTPERRDFIMQ  
NLIADL\*

>SPSA8\_v1\_830001|ID:41146384| Protein PyrBI [Includes: Aspartate carbamoyltransferase ; Aspartate  
carbamoyltransferase regulatory region] (fragment) [Spirochaetes Bin 1 SA-8]  
MKRNGPFGKRTIAVVNDLSIDEQRYLYQKTRELKHLVSTGGDYRHFKLNDPDYQVYLIFM  
EDSTRTRESFRNASKFLGARTNIFDAASSSFNKNESITDAIKMLYGYSSDSCFIMRTKLE  
GTCRWLEALGRYAETSGGPLPAFINAGDGKHEHPTQEFLDEFTFLEKLNWNDDHIHIAL  
AGDLYHGRTVHISKADGLNVFRNVEVDLIAPELLSMP SYVEKMKANGFQVRIFESIDEYL  
ANGKVASIWYFTRLQLERMGEAILERTPFLRNSVTFRKDMLGLLPENTKFYHPLPRNRAA  
PTIPTFLDDLPLNGWX

>SPSA8\_v1\_830002|ID:41146385| putative Uncharacterized RNA methyltransferase TDE\_2619 [Spirochaetes Bin 1  
SA-8]

MADTTFLVKVEKLAAGGEGIAFADRKAIFIPFSIPGETIRIRPIKETRDYIRAEIAEILT  
VSPDRTAPECPLYGICGGCSLQHIEYTAQLRLKAEAARESFVRIGKFDPGPLPVHSDKPY  
HYRNRAQFHLTRDGGMGFMKADSDEAVRADSGCPILKPALEAWL KSENKRKARPGKDMKLY  
IDQQTRFI AFADDTKIYIEGKDRTAHIVLAGRSYRFPVKHFFQSNLAMAERLIHDIESRL  
PEPGERAVDLYAGAGLFSKLLAERFSSLFCIENDTVSLEAARGNCQGP GIRFFPMDVETW  
ASRELARTGKSAPS AEASGSAGPAAQAPASAFDCVIADPPRQGLPPILKTWLASTAIKKF  
FYVSCDHATLARDIGELIKKGWELESLELYDFYPQTGHLES LAILRPAGYRAGIGA\*

>SPSA8\_v1\_830003|ID:41146386| Beta-lactamase domain protein [Spirochaetes Bin 1 SA-8]  
MSISIRSLGAAGEVTGSKHLVEVDGVRVLVDCGAFQGKRDAADAKNRDFLSGLPADTIDA  
VVLTHAHYDHCGLLPMLPKHGFAGNIFSTSATRDLANLVMMDSAHIQARDADYLSRQAEK  
KNEKFSFKPLYDDMDVVRTLERFITINYHQKLT VADGVSIEFFDAGHILGSALVRMTVKE  
KNGRVTVIGFSGDLGRNGKPIIRDPEFLTDIDYLVLESTYGDRLHEETKDAMEHLANIVS  
KTAARGGKIVIPAF AVERTQELIFNLHLLDDGRIPDLPIWVDSPMAV DATAIFKIHPEC  
YDKETNDAFTKHSDNPF GFAGLHFSRTVEDSKLLNASKEPMIIISADGMCEFGRIQHHLM  
HTIENKNNTVLIVGYMAEGLTGRKLDGASEVRIHGDFYR VNASIEEIDAFSAHADYAET  
LAWLEHTDKARLRK TFLVHGESKALEAMQEKVLAAGVRS AQIVKKGEIYEL\*

>SPSA8\_v1\_830004|ID:41146387|glyaR| Glyoxylate reductase [Spirochaetes Bin 1 SA-8]  
MSKFKVYITRQIPEAGLALLRERFDVSINPDDRPLTRSELLTNIAEADGVLCLLTDKIDA  
EVFDTAKKARGFANYAVGYDNMDVAEATKRKIPLSNTPDVL TNATAEMAWALLFSAARRV  
VESDRVMRSGAWKGGWGPLQFIGQDVTGATLGIIGAGRIGRAFAMKSRGFD MNVVYTDEYP  
CTELEEKLGARKVSLEELLSTSDFISIHVPLMPSTRHLIDEKALRMMKPTAVLINTSRGP  
VIDENALVKALKEGIIAAAGLDVYENEPKAAEGLADLPNVVMTPHTASATFDSRNGMAVK  
AATNLIAMVEGRRPPDCINPQIYSS\*

>SPSA8\_v1\_830005|ID:41146388| Transketolase, C-terminal section [Spirochaetes Bin 1 SA-8]  
MTTLKKT EIPTRKAFSMRMAERGAESEFAVFESDIGYSTYSYLF GDKFPERYFNFGIAEA



STMAAAAGMASTGRTTIVSGYGVFLTMRAVEMVRSFVCYPNLNVKILSSHGGITAAIDGV  
THQATEDIAFM TTLPNMKVLCPCDPASAKKAFDLALATPGPVFVRLMRDPLFDLYSEDDL  
KIPAKFRMGGSNVIKEGTDITIASYGDILFQAIEAADILAKEGLTAEVLDLYSLKPLDFD  
GITASLKKTAALLVAENHQARNAGAGTAIGDYLARLGMPAIFDHLGLDDTFAESGDYQGVV  
DTYGLGAKNIAETARRLILRKS\*

>SPSA8\_v1\_830006|ID:41146389| putative transketolase N-terminal section [Spirochaetes Bin 1 SA-8]  
VTALYFEIMNIDPSNPKWPLRDRFVLSKGHACPVQYAALAMRGGFFPVEELGTLRKLHSRL  
QGHPVAGKLPGIEVTSGSLGVGFCEAVGLALEARLEKSSWHVWALLGDGELNEGAIWEAA  
QAASKFSLDNLTAIVDRNRLQNDGFCDDVMPMDSISDKFRAFGWETLEIDGHDMAQILEA  
LKKAKAMQGKPCIIAKTIKKGKGVSMENKRDWHGKPPNDEQYSQAVRELQGETL\*

>SPSA8\_v1\_840001|ID:41146390| Pseudouridine synthase [Spirochaetes Bin 1 SA-8]  
LISYEILFEDNDVIAVNKLAPMPVLRDKTKDLDLQTLQREQASCCKFLEAVHRIDRRTS  
GIVVFAKTPRALKTLDEAFKNRTIHKTYLACLEKEPAPAAGILKHGIVFDKKNRISVAIP  
YESLDAAQKRLPANTQVLDAELSYTMVFQSDRYFFVTAAPRTGRHHQIRAQFAAMGWPIK  
GDLKYGARRSTQSGLLMLHAWKIEFPHVSHEMVSLTASFPPAEKLWTIFSQNMADSQ\*

>SPSA8\_v1\_840002|ID:41146391|deoD| purine-nucleoside phosphorylase [Spirochaetes Bin 1 SA-8]  
LGQLQKQFLQVQRLLGNLHFKRKEVMSIHIAAKPGQIADRILLPGDPLRAKFAIETFLEG  
AERFNEVRNMFYGTGTGKGVKVSVMGTGMGMPSLSIYVNELIRDYGVKLLIRVGTCCGMH  
KDIKIRDMILAMSASTDSAVNKIRFNGMDYAPTANFNLLMNCWDAKANGFNPFVGPVIS  
SDSFYTEDPEQWKLWARFGVLGVEMETAELYTLAAKYGVEALSILTVSDHLVTGEATSAE  
ERQLTFKAMLETALAGIHK\*

>SPSA8\_v1\_840003|ID:41146392| protein of unknown function [Spirochaetes Bin 1 SA-8]  
MKETENRVEEDFASFGQAFEEHRRARFEADV LKETT SITKEIESLQNQIVALKEQAYMNAR  
GKLEGFEDAMLADLENRKAQTYQKLDAWLTEMGKTLSSVQEEAKAQRLAEEGRYAEFFRA  
HLVKVRDDMYAQLEKMRENLLAVKESIQEENRAEQ\*

>SPSA8\_v1\_840004|ID:41146393| protein of unknown function [Spirochaetes Bin 1 SA-8]  
MLFSAGNAITLGI VLVFFFVYHKLTSNNRSLEKVKKFSEKLQIELGDYVSSRADELKHYG  
IELDVHQKAARLALAKLKEAEAAVAEKAESIGEIAERFKQYDEVLSGLMKMTERVDQNL  
RIHDDEAFAESVNKKLDLAKKSLSALEREMPLLREAFQAQDAKKTVD AFRDDILAEHLDEL  
ASTSQELSAVKKEAMEAYSKAVSARALVDAELEKALAVARERASSIEDEAFSMLTANLNS  
RLEELRNSVEGRMEELARGVASEAKSLRESVANFKLKWESQAALLEDFAHKAEAVQASF  
EEKSAATIADLNENRQGTGSRRTVQRGGQRC\*

>SPSA8\_v1\_840005|ID:41146394|rpsU| 30S ribosomal protein S21 [Spirochaetes Bin 1 SA-8]  
VITIRQIQVEDGEPELKAIKRFRMVEKEGIIREWKKREYFEKPSAIKNREKKALARKLM  
KKTRKTHDSKGGY\*

>SPSA8\_v1\_840006|ID:41146395| conserved protein of unknown function [Spirochaetes Bin 1 SA-8]  
MKNLLNVQIFILFIALILFSACSPAKISSQDLNKPNTLKTAMLRVNGIEITAEVARTEL  
ERNRGLMFRKSLPDGKGMFLVFDYDQKVAFWMKNTSLPLSVAYIASDGTITQILDLPFS  
EPRPSTRSVRYALEVPQGWFSKMNIKPGDVISIPTLK\*

>SPSA8\_v1\_840007|ID:41146396|def| peptide deformylase [Spirochaetes Bin 1 SA-8]  
MLEVITYGNEILEEKAEPVTAFFDDQLAETVAQMFEAMKRDHGIGLAAPQVALKKRLFITD  
VEGDKKRVFINPEIIMTSPEVSEYEEGCLSFPGLYFVVKRPASVTIQAYNEKGKPFITDA  
DGLLARVILHEYDHLEGKLFIDRIPPMRRERALLHYRRLVKM\*

>SPSA8\_v1\_840008|ID:41146397|fmt| Methionyl-tRNA formyltransferase [Spirochaetes Bin 1 SA-8]  
MRVLFAGSPGIAIPAMMEIAAHHELAAVLTNPPSEQGRGGTGKNRGPLPTEVAQAAKEAF  
GASVPVIEPEKLGAAVRERIASFQPDILVSFA YGKIFGPKFLALFPRGGLNIHPSLLPRH  
RGSSPIQQTILDRDTETGVCVQALAPEMDTGDLYLVERIPLSQRETAANLSEICASLGR  
MIVDVLASIEAGTAQPKPQIGDASYCRKISKEDGLLDWSLDCLTL DARIRAFDPWPGTYT  
FLAGQRLNILEAIPDIRLPNSVPGTIIGLDKAKGIIVAAGQGXX

>SPSA8\_v1\_850001|ID:41146398| Transketolase (fragment) [Spirochaetes Bin 1 SA-8]  
METPTPERTKALQEIARKMRFHIVDMVYKAQSGHCGGSLSAADIVTALYFEIMNIDPSNP  
KWPXX

>SPSA8\_v1\_850002|ID:41146399| putative Transcriptional regulator, GntR family [Spirochaetes Bin 1 SA-8]  
MKEMQKIDY PDLSEKVYREL RIMILEGELLPGEKLKQEVLAARLGISRTPLVAAFSKLEK

EMLIELLPRRGARVRALNSKELLDLYDIRIMLEPMGAGGMAHHATAEDIQKRELLESYK  
QLVDSSDHRAIRRADYEFHLAIAQMSRNEPLYRIISAFNIVFICNQGGLLKPARNSYIEH  
AALVEAIAEHDEMKAADNLMRDHLTDSRHRLLYKLEEKM\*

>SPSA8\_v1\_850003|ID:41146400| putative Transcriptional regulator [Spirochaetes Bin 1 SA-8]  
VRKIESTVVADEVYRQIKRMIDGTLEPGSRVDRQTLAEGLGVSMTVPVNEAVARLVGERF  
LERRIGSARGNDGFFVPVSQRDALVHLFEIRAGIEGIAARLCVERMIDDDSVPEVQKLC  
FFSGFDGSRPANSEETKAYTIEDMNFHEAVINFSGNTILADIDRNLGCIHVSKVKGLVR  
PPEETLSEHLAIEAFRAKDALLAQSLMTQHHLRSRDVLETLKKQQRVS\*

>SPSA8\_v1\_850004|ID:41146401| conserved protein of unknown function [Spirochaetes Bin 1 SA-8]  
MQKRRKIIIVAPVAHVEKTIPSGLHNPVEPEKIAQDVIDCAAAGASLVHLHVRDKAGNQ  
VADLSWFKETIDRIRAESAIIQGSTGGKSNLSLEDRSASVNEPRVQMASLNMGSTNFG  
SVYINTWPDIRYWAEMKKARVVPELEIFDLSMIESIVALAEEGV LAPPLHFNFSLGFKG  
ALSASADNVFRLKQALPPGSSWSLIHEGMRDFSLLA VAIGAGASGIRVGYEDGFELEPGK  
YATNAELVRKAADLVKMLGCEPATIEEAYRMLDIMKPAAVS\*

>SPSA8\_v1\_850005|ID:41146402| protein of unknown function [Spirochaetes Bin 1 SA-8]  
MFGVSPAYFFSRYSTDFSVRDYIDGLEWLKAHGFGHFQLEVFHREKLAEWENQAFSLADA  
SIQLGMQATQFVAHFLFATRTPALLSDAGMEELKRLPEIAAHFPGCTTLTLPLSPFVV  
GASYPPLNSAEYHRFWEAFCSKLLVMDELARAGGMRLALEIVPGSLMGGTEGFLRFIHE  
GNQTIGYNFDTGHAHASKECLELIPAKLAGRIYGTHLKD NAGMENLAMP PGKGTIDWTRL  
LAGLEKNGYRGSFDLEIASRAPELVFEEYLEGKACIETSLNQLDSSSSKS\*

>SPSA8\_v1\_850006|ID:41146403| conserved protein of unknown function [Spirochaetes Bin 1 SA-8]  
MIKYAVISSFLGKTKDRFHEYNQALDLEQKFKIASEIPGMAGLECVYPYEVSNAAEEVKSL  
MKKYSLGISAVNVNVKAEPEFRNGGLTSPDKNVRNKAVRFI KEAKDFAVAIGADKVTCCP  
LGDGWEFSFQTDYSKNWTYLKETFGEEAAAYKPEITLYIEYKPSETRGTCFINTAAKTILL  
IREIGLPLGLVTIDVGHSIYGGANPAEELALLHDSGLPYYVHINDNDAKWDWDYFAGSKH  
LLAYAEFLY YLRKYGYDDYVTS DTSPTRWVKG MFETNNRITARLLSRLEEMERKGF DKV  
LESGDYMAVWKFIEEELFGLK\*

>SPSA8\_v1\_850007|ID:41146404| putative transaldolase [Spirochaetes Bin 1 SA-8]  
MSEGYFQRVQKMTATRFWINNVTRNEADR SIAAGAVGCTQNPSYVWKMLTNEEERGFAEA  
QLRKILAATADDNEALILLQQELVSGIAKKFLPLYENSCGKEGYVSIQGDPFDES YDTIM  
RLARMNRACGPNIMIKIPVTEHGLSAIHQCILEGMPVNATEVMSLSQALDVC DAYDDATR  
GMKNPPIVYL SHIAGIFDEYLSGSDCSKTPEASRDVLFQAGKAVAKKIREYMNERKT NVG  
FINGGARGLHHFTEWVGADIAVTINWKGTAEELLNIDPPVVS RFD CPIPASVIDALCTIP  
EFRKAYYPEGLAPSEYESFGPVVLCSSFR TAWQNALS RIREIRTL\*

>SPSA8\_v1\_850008|ID:41146405| D-lyxose ketol-isomerase [Spirochaetes Bin 1 SA-8]  
MIYRSKVKELQAKAAIMLKNSGFPLTDSEIDSI AVADFG LGKPECEGAQILTLFATDRIS  
AKLIVLFNGQILPEHWHPPVGNPDGKKEIIRGYCGTVYYFDDFS GAPATPDVPAGKSSVY  
TCRTRLDLAPGMQVIVPPGRKHWLQGGPEGGCVISFSTCVRDILDQFTDKAIIRTEILE  
D\*

>SPSA8\_v1\_860001|ID:41146406| putative aliphatic sulfonates transport permease protein SsuC [Spirochaetes Bin 1 SA-8]  
MKKAKKLALGFAGATALILWVIASEVVNASLILPRLADVMQAIGKLSASSALAKAISGT  
FLRVLEAFTLSLVIGSLTGILSGLHESIEFFLSPFLTAIRATPVLALILVLMFWMPSSQV  
PVISAFLMAYPVMHTSLHTGIRLTDKDLLEMAQLFRVPKAPMFFLLRLPSALGHFLSGAK  
NSLGLCWKVVVAGEVISQPQFALGTKLQEARLSLETPEVFAWVFITVLLCGMSEYLLSYA  
SQSFSAGGWSX

>SPSA8\_v1\_860002|ID:41146407| conserved exported protein of unknown function [Spirochaetes Bin 1 SA-8]  
MIRKSLFKSLAAKILIGVLLVASSGLASAQANSQGXQTVRISILKGPSGVSSAWFVSSPP  
ETGSAKIEFLIAGSADIVTAKLVSGEIDAGVLPVNVA AKLYSAGIPLRAAAVVGNGMVKF  
LTNDPAIKSLSDLRGKSVAIAGQKATPDYLF RFLTSKDGLEAGKDYTA VYNLSYPEIAAA  
LASGKIQYAVLPEPFATQALLGKELLSPI SLDSLWQKHTGMQSY PMSIFVVS KKLADGN  
RQLLTKILQSLEASVKKTVEDPKGTALLVEKLDLGLKAAVAEAAIPKSNYVYEDAASDKK  
SIEALLSLFLSFEPASIGGKLPDQDFYLN\*

>SPSA8\_v1\_860003|ID:41146408| Fibronectin-binding A domain protein [Spirochaetes Bin 1 SA-8]

MSLNYKEINRILEELDLSGSKIQKIFQPSYDTIILELYRRGERVLFVLSVASGACRIHSI  
SSL SMKNERPLRFMQCLRSRIRNGIITEAVQIGNDRIVRLSIQSSGEEGERLSLFLKLW  
SGAGNILLVDSNSIIDALYRRPQKGESSGVFSLEKFAPSRPSQAGTKPSAAKEFTLRE  
LPGESEFNEKINRFYSEQAGQLSREALLAEAEIRYEKRKRFLQKLAELEKRRLEYENAE  
RYRQIGDILMAENSAQPSQNSSETVLSKTPKPKGKTCFLHATDFFSNPSISIQIDSSLSLLQN  
AQSYYEKFKKAKSGLGAVEEELLKLREAITALEAWKEKVFGTEDPFLAKMLSKGGTVRE  
KQKNRYPCIAIDNDGWTFILGRSAKENDEILRRFVRGSDMWLHARDYAGSYVFIKVPGRK  
SVPLDVLIDAGMLALYYSKGRKNIDGDIYYTPVKHVRAKDGPKGLVIPMLEKNLHVRI  
PERLKALLAHANEQQSGELS\*

>SPSA8\_v1\_860004|ID:41146409|secA| Protein translocase subunit SecA [Spirochaetes Bin 1 SA-8]  
VLGERPFDVQILGGIVLHNGKIVEMKTGEGKTLSSVSAAYLNALTGKGVHIVTVNDYLAE  
RDSQWMGKVYKFLGLSVGCILSSMDPAARRISYGC DITYGTNNEFGFDYLRDNMTWDPET  
RVQRGHA YCIVDEIDSILIDEARTPLIISGPADDDSAKITEVSRLSQSLTEVKKNPETGE  
YPDEANGESAEAGDYRIDEKSKRIMFTSEGLNHIEELLQKRNLKIGSLFDESNFEYVHYFT  
QAVRAHRMFSKDVVYVIQDGQVQIVDEFTGRILHGRYS DGLHEAIEAKERIKIARRNRT  
LATITFQNYFRMYEKISGMTGTADTEAPEFNKIYNLDVVVIPS NRPVIREQDDL VFLNE  
DEKFNAICDEIQKANTKGQPVLVGTVSIEKSEKLSALLLRGVRHEVLNAKNHAREALII  
AEAGSKGAVTIATNMAGRGTDIKLGGNPEFRARHKAGSSASDEDIRKIMEAEYQAWNRDY  
QEVRS LGGLYVIGTERHESRRIDNQLRGRSGRQGDPGKSVFFLSLDDDLMRLFGGENFKG  
MMSKVGMKPGPEPIYHPLLNR TIESAQKKVEERNFEIRKHLLEYDDVLNRQRNYIYEQRDE  
ILHDTKLIERI QASASEMLSEMISDFLEAMKSGSKSAQTDF AISLRDTFGIELSAAQLSS  
MAHDRQQLTAFIQSCLDKDIEIKKALAGEENLNLFIKYQYLQEIDNKWLDHLETMEALRE  
AVYLRSYAQKNPLLEYKIEGSDIFEQLVDSIRKSIASRVYRVRISAE EERRPAAKPGIPA  
QVIHESASSFSPGQQNRAESSFAAPRQSAAMANASGVEGATVVRTMPKVGRNDPCPCGSG  
KKYKHCHGR\*

>SPSA8\_v1\_870001|ID:41146410| Ferrous iron transport protein B (fragment) [Spirochaetes Bin 1 SA-8]  
MSCGAKLPVYVLLAGAFFTKNPGNVVMAIYLAGVILSMVSTVFLRKTILKGQTPFVME  
PPYRMPTVRGIFWHVWDKTWQYVKKAGTVILAASVLIWVITTFPQV GNESELAGRFADEA  
RIAAPGATQEQLDSIVASRLSEYRLEHSIAGSIGKFLAPVIQPLGFNWKIGVALIPGFTA  
KELVVSTLGILYGAQIDAGDGASLQDALRNDPGMNPLVAL TLMVFILVMPPCFASLATIR  
AEAGNRWMLFQVGYSLTAWVLAFLVRVAGSLLTGM\*

>SPSA8\_v1\_870002|ID:41146411| ABC-type transport system, permease component [Spirochaetes Bin 1 SA-8]  
MNFISALLNPTMPFVRNAVLAGALASILFGVLGSIVTVKRIAGLAGAISHAVLGGIGLAI  
FLAAKNIVPGLPPIV GALVFAVIAAALIGVVSLKAKQREDTVINALWAIGMSIGILFIK  
TPGYADPMSYLFGNILLVSTRDIILLAILDVIVIVLAWRFY PQIEATAFDEEFSRTRGVP  
ADTVFLVLLSITAI AVLLQTFVGVIMVIAMLTLPAGTAGYF SKNLSGMMVSATVFSLVF  
SLTGLLVSWQMDLPSGAVVVLVAGAVFLLVSALRIRKLA\*

>SPSA8\_v1\_870003|ID:41146412| Sulfate-transporting ATPase [Spirochaetes Bin 1 SA-8]  
MEHKVAIRFDRVSFSHREADVLRNTSFHVHEKEFVALVGPNGAGKTLLRLVMGLAVPAS  
GKVEVFGASPRSVQASIGYVPQYMNFDSSFPISVEEVVKMGRLVGLGRGCMEKRCADVDT  
ALELAEVADLRKRPYAALSGGQRRRVLVARALASNPRLLILDEPTANMDVESEKRLYTVL  
GNLKKTATILIAHDTGFVSALTDVVL CVTEDGKKGSHHVVRHASVPAEDVPVDLYGSHVV  
RILHDTDL PDDICCGTERQGAAR\*

>SPSA8\_v1\_870004|ID:41146413| ABC-type metal ion transport system, periplasmic component/surface adhesin [Spirochaetes Bin 1 SA-8]  
MKRTHHGLHDKPMLGRGNISIIAGFAAVLFLVPLAAISAQASSSSGQKPVI AVSILPQA  
EFVQKIAGGSVSVVTLVGP GASPHNYEPSRQMTTEL GKASIWFTIGVEFENALMPKIKSL  
YPKLKIIDTTAGIVYRNLEAHHHEGEAAQAE EESGKDPHVWLGHDAVKAQLAVMLDALTA  
LNPAGKAQYKKNHDSYVQAIDAAFVQLKKDLAPMKGQTVFVYHPSFGYFFDEF GIIQEAV  
EAGGKEPSQKSLAVLIKQAQEDKVKVIFVQKQFSTNAAKTVAKAIGGSVVEIDPLASNWL  
ENIMVMGNALKKAAR\*

>SPSA8\_v1\_870005|ID:41146414| conserved protein of unknown function [Spirochaetes Bin 1 SA-8]  
MTHISKALIKNRRAIQAI VATGVYIAASALGLNLIWILVAGSVLGVLF GKVYCRWACPIG  
FMELAMSF SKDGKFRQMYQYHKVGCPIAWISGTLNKYSLFRIRRDDK SCKCGACDKVC

YISSLEPSQFSLFKRGKDNPATSFSCSKCMECVAACPTKSLIFTSK\*

>SPSA8\_v1\_870006|ID:41146415| putative 26 kDa periplasmic immunogenic protein [Spirochaetes Bin 1 SA-8]  
MRFGQKRGTALLSCIAILAMIAVGGAAAGAQAQTIRVVGEASMSVDADMAVLVLGVVQQ  
GKTPTLAQQA VSMASDRILASITGLGIDRKKMRTGNFSMYAVYDDKPGKQNDIIGYRAET  
SITVTIEDLKQVALVMERALFAGANQIQNLQFQKKNEEALRLQLLKEAAENAACKKAQAIA  
NGLGLSILKPVSVVEEQSYSMRAPNRDMYLTKAAAGSGQDPFAAGSIELTASVSALFEVAA  
EKP\*

>SPSA8\_v1\_870007|ID:41146416| conserved protein of unknown function [Spirochaetes Bin 1 SA-8]  
MVRLVNRHALFAVRHHDLPDLLAGKLNALITRPFKGRDWDYDAVWYLSKTPAIEPNADLL  
GSALAQFGIPYKGDWRPLLREKLQQIDFRAARNDVYPFLEKPEADYLTREYLEQLLER\*

>SPSA8\_v1\_880001|ID:41146417| protein of unknown function [Spirochaetes Bin 1 SA-8]  
LKTRQGLKRNCELWQMHSVAADLKTRQGLKRELDLDRSPQNVLRPLQRT\*

>SPSA8\_v1\_880002|ID:41146418| protein of unknown function [Spirochaetes Bin 1 SA-8]  
LKTRQGLKHIDSAKTKLFEIVAADLKTRQGLKPRNII MAMIRGVAADLKTRQGLKQCII  
DGGSDVLDVAADLKTRQGLKRR\*

>SPSA8\_v1\_880003|ID:41146419| protein of unknown function [Spirochaetes Bin 1 SA-8]  
MKIEEVAADLKTRQGLKLTSMVDNII LCKVAADLKTRQGLKRS\*

>SPSA8\_v1\_880004|ID:41146420| protein of unknown function [Spirochaetes Bin 1 SA-8]  
MVGCSGLENPTGIETGDYKTHAATEPTVAADLKTRQGLKHTPLWEATEKVVQLQRT\*

>SPSA8\_v1\_880005|ID:41146421| protein of unknown function [Spirochaetes Bin 1 SA-8]  
LKTRQGLKRYDSFTYPQKGFVAADLKTRQGLKQREKTMIISSTDWLQRT\*

>SPSA8\_v1\_880006|ID:41146422| protein of unknown function [Spirochaetes Bin 1 SA-8]  
LKTRQGLKHITIYSPIDSADRRSCSGLENPTGIETRSSVQDDISGVTSCSGLENPTGIET  
SNPHFAEMENASVAADLKTRQGLKLIQHLYEVKEGKVAADLKTRQGLKPRD\*

>SPSA8\_v1\_880007|ID:41146423| protein of unknown function [Spirochaetes Bin 1 SA-8]  
MNRCAIYSDNSCSGLENPTGIETNPALTPSDTASSVAADLKTRQGLKRTEYDTILSFEPF  
VAADLKTRQGLKRAKKNPCHRAGPIVAADLKTRQGLKLVIGLQGNAGGVVVAADLKTRQG  
LKPNDYKAYAMP\*

>SPSA8\_v1\_890001|ID:41146424| protein of unknown function [Spirochaetes Bin 1 SA-8]  
MIRVKNQKQIEGIRASCALLSRLLEVRKAIAPGVSGLELDELAEDFIRKXX

>SPSA8\_v1\_890002|ID:41146425| nusB| N utilization substance protein B homolog [Spirochaetes Bin 1 SA-8]  
MASRRKARILAFQAIYAWEASGTPLEELLKFSWLEQDKVSNIEDEIAAFSRLIITGTLEK  
CAEVDAAIKRHLAHWPFERLKKVDLAILRMGTYCLLYQKDLPAQITIDEAIEIAKEYGSD  
ESYKFINGVLDGINKESR\*

>SPSA8\_v1\_890003|ID:41146426| putative PpiC-type peptidyl-prolyl cis-trans isomerase [Spirochaetes Bin 1 SA-8]  
MKRFLFFACVAFASGTAQTIDKPAATIKLTKQEVISVRQIKADVEKLEKATGAKFTA  
DQIKQVLDARINSMLFIQFCDREKITVSEADVANALNQMKA SLGSKATDADLEASLRASG  
VFVEPKVYVRQRLLFETYVQTKRADELKKALTPPTADEILKAYDLAKATLVRPDTMRISI  
LYVDIRGKSDADIKKAKETMQSMASLKLNSTKFDEYVLRSGDAAGYKAIQSMYLEKTTQ  
NKTIFGQELFDVFKLKPGEISPLVESPTGFRIVRANEFLPQKQLGLS DTVPGNQNMVTVQ  
DFLIYQLAGEKEQKFMDTLEADLIQKLRNDATIKIYDENLKW\*

>SPSA8\_v1\_890004|ID:41146427| putative Heat shock protein DnaJ domain protein [Spirochaetes Bin 1 SA-8]  
MENYVDVLGVSPDSNQSTIKSAFRKKAKKFHPDLAASDTIEKAEELQAEKKTANPSGKTR  
NNSVASVRESAMRLILEAYRILSDAEKRRAYDRILRRQKKEEGGFNYREFLKARNKD PES  
QAKLIVYDLLHNLESEALEIYERSKSFDFRLERYLDRGDAMDAEYCLAEEYEKRGRLK  
AYSIIYKKLILMEKEKAWFRYYFDVVTLRFRTLMLQKMPGRIDEEDYLDRLDEVVGLDIGL  
RDSAQFLRKKAEVLIRRKQYLEARLALQEAERRMPRLPGLSAVRHRLEEVGF\*

>SPSA8\_v1\_890005|ID:41146428| conserved protein of unknown function [Spirochaetes Bin 1 SA-8]  
MRIA VLTINDNDGSNTLDRLAKVAENEF SRGGNHVEIVKDASLQLQYFDFIILLTRPVGF  
SGKPSMKIRQVLKNSGNLIGKRSMVVLFFKGLFLQSM LRNAMSELEKEGLLVTTGERITN  
DEQLIAVLR TAPLRR\*

>SPSA8\_v1\_890006|ID:41146429| UspA domain-containing protein [Spirochaetes Bin 1 SA-8]  
MVKWVESVLVAINGSEASISAMKCAIALGKLHDTRVAACYVVD TATIRQLALSRIFIQEE  
SEEYERSLEMSGKRYLGLCAELAKQKGV EIQLLKKGSVPGEI IKAAMELNADMIFLGGN

PQEPQYRDVIAEANREIVKNARCSVLVVKPHTGDEIYKKLP\*

>SPSA8\_v1\_890007|ID:41146430|atpD| V-type ATP synthase subunit D 2 [Spirochaetes Bin 1 SA-8]  
MAQPMPTKTNLIKEKRTLALALQGYDLLEKKREILVIELLKRIDELELLEDEIRKTTE  
KAYGTLKKMLLSAGRERSQAISALPARQMILKASRVNVSGMNLPVDAQAGELKLHYSFL  
NSFAVCDETMIEFTELVSKLAVAASLRSIVWRLAREVKKTQRRVNALDKLVIPRSKEIVS  
FIEASLDERDRESLFAIKMLKQHMSEEV\*

>SPSA8\_v1\_890008|ID:41146431| protein of unknown function [Spirochaetes Bin 1 SA-8]  
LLRIPESLLNKYLPAGETPDGGRS\*

>SPSA8\_v1\_900001|ID:41146432| Homoserine kinase (fragment) [Spirochaetes Bin 1 SA-8]  
MIRISVPATSANIGAGFDTLGIALALPASFAVEPAETTSISGCPVEFQTEDNLFLRSMRK  
ANEILGYENRPIRLHIESAIPVARGLGSSAALTVGGVLAAMRHGGARSAAPLSADEKALA  
LQIATLVEGHXX

>SPSA8\_v1\_900002|ID:41146433|thrC| Threonine synthase [Spirochaetes Bin 1 SA-8]  
VRGFFYASVLVILEPMQEILFRSTVGGADAPVPVETAIAEGMPADGGLYVPVSPFRLPDP  
DRVFSPEPLSYTELAFVMKPYFSGWDEAILKEILRKAQYDQNAAGAGREPYFDTGEVVPLV  
PLEGIAQSPGARVVFVLELFHGRTCFAKDMALSVLGGLIHHSLELGRREPLAILTATSGD  
TGSAALEGLAGVPGLKTAVVYPHAGTSEIQRLQMVTTSPENRLVLGLEGNFDDAQS AVKA  
IFASAAISADFAGIRLSSANSINIGRLLPQIVYYVKAWRDLSVRGALGRDGQMNVAVPTG  
NFGDILAAKYAKEMGLPIGTLVCASNANKVLADFFATGVYDRCRPLVKTNSPSMDILVSS  
NLERLVFLAAGQNPERVKTLM SNLKTGIFKLNKETA YLADFEAGWCSDYSAGSAISKA  
WSVSHVLLDPHTATALDVVLQKEHILKDGTPVIAGTASPYKFPACSEALGFTHSDSSA  
SSDLDCALQLEAKTG VAMPRQLKDL SAKTVHHRKVVTKEALAAELA QFFRNKSE\*

>SPSA8\_v1\_900003|ID:41146434| Ferroxidase [Spirochaetes Bin 1 SA-8]  
MISTKMADRINLQINREMFSAYLYMAMSARMTEMGYTGIGKWLMIQYHEEMFHAMKFAKY  
LQDQGASVKLDKLDAPFPEKTVKELFQHV LKHEQWVTASIREMVELARAEKDYATENLL  
NWyIDEQVEEEKNATEILQAIDLIGSSAQGLFMLNIELGKRDNHAPLDFTKA\*

>SPSA8\_v1\_900004|ID:41146435| putative Nitroreductase [Spirochaetes Bin 1 SA-8]  
MLNLVSAMKTRVSTRFTD G KPLSEEEQA ALEKLLQDVERAEKPDFLLPVRLTLHAGPGAK  
MGTFGLIASAAGFLVPAVRNAPFAMESVGYSLERAILGAASLGIGSCWIGGVFSRAKANE  
AARAGKDEMVPVIAALGHPASQRS LADRIVTGAAQSRIRKPISEIFFSLAAQPRDGIDTS  
EEAASAGKLSAPWDTILELVRIAPSASNKQPWRIVQVSEIPYFVFFMEENYRYNNSLGDV  
HLQNIDMGIAMCHFDAAAEA YGLAGTWRPLVEHKDTSSSAEDEK VGRALAFGRSRGWKPI  
AVWQQR\*

>SPSA8\_v1\_910001|ID:41146436| ABC transporter related protein (fragment) [Spirochaetes Bin 1 SA-8]  
MSAQKDTQKDTGMPAGGMAPGNAMRPGGMRPGA AFGRGGPQAMMKGEKARNFKGTMKKLI  
AYLGPKLSILVVLIFAVGSTVFSIVGPKILGKATTKLFEGVMQTIAGSGTGIDFSYIGG  
ILLTVLILYGTSALFGYIQGWIMSGVSVKITYRFREEILSKINRMPLRYFDGTNHGEVLS  
RMTNDVDVTVNQTL SQLSQMITSVVTVLGVLVMML SISWQMTLVAMLILPLSLFIIRFIV  
SRSQKYFKEQQVYLGHVNGHIEEMFGSHA VVKAFNGEEKNIRKFDENGLTYNTAWKSQF  
LSSIMPM MNFVGNLGYVGVTIMGGYLA VKKL VSLGDIQAFIQYVRSFTQPISQIANISN  
VLQQTAA SAERVFEEFL EAEELPEQEX

>SPSA8\_v1\_910002|ID:41146437| ABC-type multidrug transport system, ATPase and permease component  
[Spirochaetes Bin 1 SA-8]

MIRLFRYLKPYIASIILVIALIFIQANADLALPDYMSKIVNIGIQQSGISDAVPEVIRQS  
EMEKIQLFSLDEEKTA VLEAYSLADSTSSVYSSLQAKYPGAKGEPLFALKTVSTETRAKL  
NTVLSVPLSLVSTIEQA AADPEKAKTMTQGMPFDM SKLPPGTDLFGVLKMLPESQKASVL  
ASIRGKFEALDPMLREQMGIRAVRAEYEALSANIGALQNSYILKTGALMILLTLVSVTAT  
ILVGFLGARTAAGLARDLRGDVFRKVENFSFSELDRFSTASLITRSTNDITQIQMVVIMG  
LRMIFYAPIIGGGVIRATAKASTMWWI ALAVGVLLVLIGTVFKIAIPKFKSIQKLIDR  
LNLIVRENLSGMMVIRAFTMQGYEEKRFEKANRDLTGTMFLVTRVMVVLMLPLMMLIMNLV  
SLLIWTGAHEVASSQIRIGDMMAFMQYSMQIFFAFIMLSMMFIILPRASVSADRIADVL  
AEEPQIKDPEKPLHFPEPFTGTISFKNVTFRYPGSSSEDLHQISFDARPGQTTAILGTTG  
AGKSTLVSLIPRFYDVSEGSIEVDGIDVRXVSQKELRDKIGFVPQKGSLSFGTIESNLLY  
AKEDATPEEIQTALAIQA SEFVNAKPEGGQAEISQGGINVS GGQRQRLTIARALVKNAP

IYIFDDSFALDFKTDMLRQALKSGVKDSTVLLVTQRVATIKHADQIIVLDEGRMVIGI  
THRQLMETCEVYRDIALSQLKQEELA\*

>SPSA8\_v1\_910003|ID:41146438| protein of unknown function [Spirochaetes Bin 1 SA-8]  
MLDRLVQQGLVERIEDPEDRRGKRLSLTDKGMKMOVQEGIYARQEWMTLSASLSDSEKEI  
ISAALALLVEKAKNINSAPRGANPHETGAIRCL\*

>SPSA8\_v1\_920001|ID:41146439| protein of unknown function [Spirochaetes Bin 1 SA-8]  
MKKLIASDGVSGDEFGYSLAAFGNRMVTGAHYANSKEGAAYVIPLKP\*

>SPSA8\_v1\_920002|ID:41146440| protein of unknown function [Spirochaetes Bin 1 SA-8]  
MKKIIVDIDNTLWDLAPVFFEYLNRYNPEIPVEDLKRGETRLKGYIPREDLYGVLKEIHM  
RQDQFKPYPEARDFLSTLKEMGLYVIASIRDEEARDATERWLMKYDLPYDELHLSNDKT  
VLFNDAWAIVDDSIWTLDKAAQAGIVRTGLRNVWNESRGHLLFDLPEIIDYLLKKQPCPR  
\*

>SPSA8\_v1\_920003|ID:41146441| protein of unknown function [Spirochaetes Bin 1 SA-8]  
MQLKPQRKNDELLEGGIFSLTGYSWSGHYKKKGAEKLIEMINEAGGINGKCLRLIAYD  
DRSSPEQAAKIAEILVLRVVIAMIGTGLSPISGAVARVANKYKIPAFNLNSGYAIDPLSD  
LFVFNSTSHKTEFAIACSFVGFVERGIGRIALLMPKGPLGDLGSLGRQVGSHLGIKIVGE  
ERFDVSVPEMSTSQLDRLKSLKPQALFSFVTGEPAAARLVKMMTHLGINIPLLVSHGNANPA  
FLKLVSRASVPIIVPSGKTMVIDSIPELDPGKNKMKDFSTMHVKRFGEPAANYCSAESADA  
IDLLAEGLRSSGRPDGRILRDVAESIRQFHGMQGVYDLSPIDHYGTQVEHMLVLEVDQGA  
WHLTKRFSSVGVFESIHSNKRRLVFRLLARAFNEPSTEALTLACETQGCAEKLAQVGLS  
CTNLKADPCFAVKLSSREKQELMQAIREEDYAKAKESLCRSLTISLLHYYKAFEPLKLAV  
SELFHALFDAAASEEGVDLEKLIELKSKYVLEWANLKDQEALCFWTVRVFRETMEMLLCDR  
RRERGSGLLKNILRFIEMHFAEDLTVERIAREVCLSPSRLIHRMKSQYGLTSLDCIARVR  
MDKAKALLRDTDMTICEIAHEVGYADQGYFTRVFKKCLNKTPGNYRESCRIFLS\*

>SPSA8\_v1\_920004|ID:41146442| protein of unknown function [Spirochaetes Bin 1 SA-8]  
MKKLSVLITLCFVFMFTGVGPVIAQTKAPYKIGGIFPLTGYSWLGEYKKKGSELKVEL  
INKAGGVNRPLELVVYDDQSSPETGSRVAQRLVSKXX

>SPSA8\_v1\_930001|ID:41146443| exported protein of unknown function [Spirochaetes Bin 1 SA-8]  
MKKNKFLPAVMSFFIFAMIAPPSVAHAQETAISLGSWSFFSGSPGVFTSLGITQGLTPRL  
EAGLSLIPRLTPEPFEDFYAEHLGYSLAANRFQGLNQPASYINILGDIGIAGISSIGA  
PGQTLKKSIFIRLTPITLGNAFYGRRDRIYSAGALFKLDSPLTFFLNFIISDFFIAKRS  
N\*

>SPSA8\_v1\_930002|ID:41146444| exported protein of unknown function [Spirochaetes Bin 1 SA-8]  
MSHNARFSLIMLLIFICSGAAFSQQDSSQKPAISYSAGMAGFSDSAFSAEATLRFIFISL  
ESERANPFAPSLFAAIQVDFNPLSLQTAYWGLGFNLTLFSLQHFFSFASMRKTSWAPAF  
SAAFYFPFDSAKNYSFEAAAEPRLFTGSSYVSLSPGALFSKNFKITGYSLSPFKFTYH  
FY\*

>SPSA8\_v1\_930003|ID:41146445| exported protein of unknown function [Spirochaetes Bin 1 SA-8]  
MPRLFSIIFSLFLVSSVSAQAAPSTAESADPIGQYLSARSIPSYESSLPRYYFSGEAWNE  
RAFELVANAKSYILIDSFLVNAHPVNQKIIDALREKAEAGVRVYIIFDSSSYFTYMPDFV  
SYLPTPVVTRFRGTRVNVAEYNSINGTKLFALPQLLNRDHRKFWIVDGHTVALGGMNLNYY  
SMKESSLGNIDTFVEVQSPPAIRQLISSFVETWNLCSPMPLNANSFTTTQPPEPNYQPE  
TRLWLFQDLHGRSEVNALFDSFFNFAQRELWMIQGYTFATPELLKKIKKATSRGVTVNI  
LLSTNSFREYELASNYCVLDLIRAGANVFMFDDPGKAFLHYKLFLADRTAAAFGSPNFN  
FRSQYLSREIAILFNDERVGRAAYENLETLLARSRPVTKDEAERYRGLKYFIA YMEMLFG  
G\*

>SPSA8\_v1\_930004|ID:41146446| dTDP-4-dehydrorhamnose reductase [Spirochaetes Bin 1 SA-8]  
MKILLTGATGLLGRALRKQLLLIPNFELTAAAYSRAVPPLVKADLTDSGHVETLFTETARP  
DIVIHAAAERRPDIVDSQPEKARTLNVAATETIASACARHSASLLYISTDYVFDGSNPPY  
FPDSPVNPLNEYGRLKLEGERIINKTCPKGAILRIPLLYGPVEFLEECVTELAKKLLVT  
APVKVEHWARRYPLHVDDVSRAIIAITSAMRDFSEDFPIFLLSGPVSWTKYEMLLEIGRV  
LGKSTSHVIPDTAPPSGAPRPKDCRMDTSRLES LGYTPQIAFGGEGIKSALLPFFNIGV\*

>SPSA8\_v1\_930005|ID:41146447| protein of unknown function [Spirochaetes Bin 1 SA-8]  
MDTIFWSARQNDAWRKVGLAEMLKGGVIMDVTNAEQAKIAEKAGAAVMALEXX

>SPSA8\_v1\_940001|ID:41146448| protein of unknown function [Spirochaetes Bin 1 SA-8]  
VSHDRWFLDRVCTHILAFEGDSQAIWFDGNWTEFAEWRRATLGIDADRPHRIVYRKLER\*

>SPSA8\_v1\_940002|ID:41146449| conserved membrane protein of unknown function [Spirochaetes Bin 1 SA-8]  
VDTSAVSKESAQIAASAERKRAGLLAMAGCAVLWSMGGFLIKLIDWQPFAIAGARSAIAA  
LFLFIWIRKPKFTFSLLQTSSALAYAATMLLFVFNKHTTAANAILLQYGAPVYVALLGS  
YMLKEVPKLEEWLALLAICAGMVLFFMDSLAAAGHLLGDTVAVISGFALNIVLMRKQKD  
ADPLSSMLLGHIFAAIAGIISLFLAPLVISPRSLAAISALGVVQIGLAAVLFSYGIKRV  
TALQGVLTAVIEPIFNPVVWVFLVTGEIPGSKSILGGLVIISAVLISSVISIRKAGKAS\*

>SPSA8\_v1\_940003|ID:41146450| conserved membrane protein of unknown function [Spirochaetes Bin 1 SA-8]  
MKQSFISATILLVLITDPLGNIPLFLASLKHVEPSRRRIVILRECAIAFFTLVIFLFFGS  
AFLDALNLSDETLRIAGGVILFLIALNMVFPGSGGKLVEEESGSEPFIVPVAIPLIAGPS  
AMTTVMMLLAKSFPDRKLEWVGSIFIAIMITTIVFFSSTRLQAWLGSRFLSAIEKLMGLVL  
TAIAIEMLLGGITNYVRLIQG\*

>SPSA8\_v1\_940004|ID:41146451| putative Histidine kinase [Spirochaetes Bin 1 SA-8]  
MKWSTIDNIFVDEAMLSALRQSGAESKPVVSRIFNIPPLGKPGFAVVYGLYANTPDRKNP  
SAYVLHLLLEAETDFFPMISSWPIPSETAESYLIRRSQDEILYLSPLATMPGAALTFSHPV  
SRGNSAEAQALSQKTGLLKGRNYHGKQVFAYALPIPDSDMTLTFVSMHQNEVMRPWIASLI  
SHILAAAALLACGIIAVHMISAARMTREMRKELTLAKQLQEEHKKFDFAFMKYMPMSMIMMK  
DKTNRILYTNSRFDSEHFPEHEWIGKTPTEIFTPEQAKITLAMDRKALEEDYCEYQEIRTD  
KSGNELILLTQKFRIDIEGKDPLIGQIITDITDKEQAFKEIIKLNENLEQRVKERTEQLE  
ASNAELRSFSNSIAHDLRSPLRAFDGYLQLLSEGRPIFDDEGKRYLAKLSAASERMKTI  
IDDLNLLSKISSTEMILENVLDLALVNRVASYIVRENSKSKISLSIAPKAKALCDARLAN  
ILIECLDNSFKFSRDIQDIKIEFGTAKNKM FYLRDNLGFDMEYAGKLFQPFQRMHPAD  
EYPGNGIGLAIKRIVDRHGGTIRIESSPEKGTTVYFSLESV\*

>SPSA8\_v1\_950001|ID:41146452| Cyclase family protein (fragment) [Spirochaetes Bin 1 SA-8]  
VGGDIDLLLNRQAVIGCYPWRFVDGESSIARIVAHVDDDRYEELMKKKAKAELTRFGDVA  
GAKNSWLHEEAKKLHRK\*

>SPSA8\_v1\_950002|ID:41146453| Transcriptional regulator, GntR family [Spirochaetes Bin 1 SA-8]  
MAGRNLSGEIYETLADRIKSWRYLPGHRFTEEDLCREFSVSRSPVREALNMLVKANLIQK  
EERKGYRVRKMDLRELIELYNTRLILELAVIDMLCDKGIPAQTIQELKARWERLQSALPS  
MAQEAALERDFHEALAEAADNRVIQRLLEIDQDIRFVRLSDITDQERLKKTCSDHLRI  
LTALETGDRELAKRTLSENIMWGRDKVASALKDALIHACDVA\*

>SPSA8\_v1\_950003|ID:41146454| protein of unknown function [Spirochaetes Bin 1 SA-8]  
MPAMLRKPAGLTAILRGSRFPKEPFPVFLHSIFPSAINISRENDELLASLVLKKSAMHPR  
AVFVLSDGQEPVDFSRNLAPGMEGHADADGFHIQSELLIPYARDVTTLPSRISIEFSN  
LHHDWLRAFEYCTAQLSALQKQKNSDLDIETLIVGESEGDLPACTSFDARQRALLIKSIQ  
NLGKAMWQADAKSALRHACRLIGLQGLTPAGDDFLTGFYSYALMCRQQAEDKQSLAASE  
FLNGLKNRLRNEPGQTNDISRTFLLLSLSEGEASEALKRLASAFEDGFSRQQFEFALQVLA  
GIGHSSGLDAACGFIYGVFQNDRAFSSKSLRTFANSQQCRL\*

>SPSA8\_v1\_950004|ID:41146455| Carbon-monoxide dehydrogenase (Acceptor) [Spirochaetes Bin 1 SA-8]  
MLHEFTYKAPVTREDFKLLDDHGSEAKILAGGTDLLVNIRNGVMKPAVVVDVKKIPRYK  
DISYSEQEGLLIRPGVTINDILRNHEIQENFPLLQECGHDLASYQIRNRATAIGNVNNAS  
PCSDMAPALLCLGAQAVIASSNGTRTLPFSRFFTGVKKTVLQTGEILESIAIPASARGAK  
GAYKKLKRINGHDLGIVGVAVSIKDDILRIAVSSAAPTVPVTPDLPADIPAEDA VAATMN  
IISPISDVRCSEKEYREFMVGVFVRLLAEVRK\*

>SPSA8\_v1\_950005|ID:41146456| xdhC| xanthine dehydrogenase, Fe-S binding subunit [Spirochaetes Bin 1 SA-8]  
MRVKLTVNGELYERDVKDNKTLRFLREDLGFLGPKGEGCGAGECGACTVFMNGKTVNSCM  
VLAEEADGAEIETIEGESKDGMLSKLQQAFDRNHAVQCGFCTSGMIMSARELIRIHPKPT  
VEEIKEGLEGNFCRCTGYKQIIAEVLDATGQLDEKEGLKYAGK\*

>SPSA8\_v1\_960001|ID:41146457| protein of unknown function [Spirochaetes Bin 1 SA-8]  
MTAELIKTGFLQSSFDAVDMYCKPARQVALLQCIVMFHEEAAA AVNAGVPLPKIAALPQ  
REKLARLKSTMTNEDLSPAHLVQDEIKAMFADLRSHYEKAAHL\*

>SPSA8\_v1\_960002|ID:41146458|atpB| V-type ATP synthase beta chain 2 [Spirochaetes Bin 1 SA-8]  
MRGVEYRGLLKADGPVIAARRENAGFSELVQVRDRNGEIKLGRVVDLSEQAVAIQLFSD

TSGITIHDAAWVEYLEKPLQFRVGDDIIGRIFNGLGEPIDGYPAIFSSDLRDLINGQPINPS  
ARVYPRDFIQTGISAIDGMNTLIRGQKLPIFSGNGLPHNKLAAQIVRQAQVRSQDSQFAI  
VFAGMGIKYDVTRYFISEFENSGVLSRVVMFLSLADSPSIELVTPRTALAAEYLAYEK  
NMQVLVVLTDMTNYCEALREVSAAARNEVPSRKGYPGYL YSDLASIYERAGKIEGCSGSIT  
QLPILSMPNDDISHPIPDLTGYITEGQIVLERDMSQRGIYPPIAGLPSLSRLMKDGIGEG  
MTREDHRDLAAQLFSAYAYVKSVRDLAAIIGEEEVSERDKLFLAFGERFEREFLAQGERE  
NRTIEQTLDIGWKVLSVLPREELLRIPESSLNKYLPXGETPDGGERE\*

>SPSA8\_v1\_960003|ID:41146459|atpD| V-type ATP synthase subunit D 2 [Spirochaetes Bin 1 SA-8]  
MAQPMPAPTKTNLIKEKRTLALALQGYDLLEKKREILVIELLKRIDELELLEDEIRKTTE  
KAYGTLKKMLLSAGRERSQAISALPARQMILKASRVNVSGMNLVIDAQAGELKLHYSFL  
NSFAVCDETMIEFTEL VSKLAVAASLRSIVWRLAREVKKTRRRVNALDKLVIPRSKEIVS  
FIEASLDERDRESLFAIKMLKQHMSEEV\*

>SPSA8\_v1\_960004|ID:41146460| UspA domain-containing protein [Spirochaetes Bin 1 SA-8]  
MVKWVESVLVAINGSEASISAMKCAIALGKLHDTRVAACYVVDATIRQLALSRIFIQEE  
SEEYERSLEMSGKRYLGLCAELAKQKGVEIQLLLKKGSVPGEIKAAMELNADMIFLGGN  
PQEPQYRDVIAEANREIVKNARCSVLVVKPHTGDEIYKKLP\*

>SPSA8\_v1\_960005|ID:41146461| protein of unknown function [Spirochaetes Bin 1 SA-8]  
MRIAFLTINDNDGSNTLDRLAKVXX

>SPSA8\_v1\_970001|ID:41146462| Ribonuclease PH (fragment) [Spirochaetes Bin 1 SA-8]  
VIQKIPLRDSVA AISVGLVGGEILLDSYEEDSKAEVDMNFVMTGKGQLIEIQGTAEKTP  
FSKEQLDVMYQYAYKGIGEITRHQKIALGPMFPA\*

>SPSA8\_v1\_970002|ID:41146463| Non-canonical purine NTP pyrophosphatase [Spirochaetes Bin 1 SA-8]  
MKNIIATENMGKFREIKALLEHEFDNFYSLRDFQEKVPVEEDSELYIENALKKARKVGD  
RFGMHTLADDSGLEVKALGGRPGVRSSRYGMSDDERIFRLLSELEGIPWDQREAVFKAYL  
AFYMPERERCYVFGELRGIIGLEKHGRNGFGFDPVFYVPERNKYLAEIPMEEKNRLSHR  
GKAIQSFINFIQ\*

>SPSA8\_v1\_970003|ID:41146464| ATPase involved in chromosome partitioning-like protein (fragment) [Spirochaetes Bin 1 SA-8]  
MHTMETILITWWDRTKNFIKGFVVRTSDNTLSHEQEYIRKEPPVPRLRHNESGWISPPYL  
TSKHVRLDGKVAENRCV GALARPCEIDSYKILRAQVTQLTKQEGKNTIMVTSAREGEGK  
TLTAINFALSLAMEFDQTVLLVDCDLKKQSVHKVLGVESMHGLSDYLISGADLSELILWP  
GIEKFTFVSGGRPLHDSSELLGSPRMKELMAEMKNRYPERYIVFDVPAVLTGADALAFAP  
LVDGILLVVEAGKTSIHVDVNEAISLLPKEKILGLVLNKSGLGGNV\*

>SPSA8\_v1\_970004|ID:41146465| Chain length determinant protein, Wzz-like protein (fragment) [Spirochaetes Bin 1 SA-8]  
VATVLSLYLQENLSQREQQTAGVSKFLQDETQVLQAQLVELNSKIATFKGKNVGALPEL  
LQANLQGLDRSDRDLIQLKQDLRDLRDKESYLVIQLSNIPPTGTANADKLLLKELRSKLA  
QLQAKYSDQYDPVIKTKREIAELEGRVGTGTGTEGTEKAKSDFIPAEQSDNEAYVTLASQL  
ASTRSDIQSVQRQLVETEKKRNEYQRRIEASPRVDETYKALLLERNAIQAKYDDLTRKAM  
EAKVAQGLEKGMGERFTLIDPARVPGKPIKPNRLAILLIGFILGIGAGVGMALQEAID  
HSVRDSRTLALTGVPVLGTIPNIVTIKDVTERKKRNRTIVISVTTVLVLAILLVHFLFM  
DFTILWARLSRRF\*

>SPSA8\_v1\_980001|ID:41146466| conserved protein of unknown function [Spirochaetes Bin 1 SA-8]  
VFELKTVQENDHLDIEKPCIDALDEGHVNEWSTELTLDEARMEYLNAWIAVNLLAALFSK  
KPQDFFFNMSVGYTLAGIQGKKVDGFIEMRRPEATEYWEKAIAELQAFVAGKTFAAAFG  
DANLEKAKTLAAHMPVRPVHSVTLSTMHGCPPDEIEKIGRYLIEEKGFDTYIKLNPTLLG  
YDEARKILDQLGWTEISLKRESFEHDLQFDQAIKLIQTLTTVAREHSCRFGIKLSNTLAN  
ANVDERLPGAERYMSGRALFPITISLAAKLAKALPNFDSRFSYCGGVSAALNAADLIKAGM  
GPLTVATDILKPGGYLRLSQIASEVTGSVPFAPGCVDPALQLSQAVLARPEYRKEWKI  
GTVSIRKPLPLFDCFAAPCIEACPVNQKAPAYIKAQGEKPEQALATILSDNPLAHTTG  
LCDHVCQEHCSRDLDEYGSVRIRDVKLTSARTSPIPAAKLPEHAAKPSGKTA VIGAGPAGL  
ACAYHLALS GYPVTVFDADNTLGGVPTNIIPSFRIEREELKADLDRIQALGVEFVNTYI  
DSLKKLSEKGYTSFFIGIAHKARELPLKSGSVRVISALEFLEEC SKQGTQAFAGIQHV  
VAGGGNTACDAVRAATRIPGIASVRLSYRRTKKEMPADLELENALQEASAINLADAEAP



AVLHELSPESARPGKLTLRVMKLGKEDSSGRRSPVPTTEETFEVPCDLVIAAVGEEPDR  
FFEKLGIECGKNSLPTVNPATLETSANVYAGGDARRGPASIIAAEADGRKAAFAILAKE  
GFSTPQPDYAPALDKNKLARRGELLPSLPFDHPDFAKREAERCLACDSACLRCVEVCPN  
XANIYIEMGLPFKQDAQIVHVDKLCNECGNCGFFCPYEGERPFSGKPTLFDTIEDMEHSRN  
AGFCFIFSRKLPALAVRSEIGGSISRFDYASWNXX

>SPSA8\_v1\_990001|ID:41146467| protein of unknown function [Spirochaetes Bin 1 SA-8]  
VAVASDPKIEGYGNNPSAEIFQDFVVASDPKIEGYGNLNNLPLLWWTGVASDPKIEGYG  
NLLGISSPFLQVASDPKIEGYGNVYK\*

>SPSA8\_v1\_990002|ID:41146468| protein of unknown function [Spirochaetes Bin 1 SA-8]  
MALIVASDPKIEGYGNKTTFRVAVSGLIPVASDPKIEGYGNVVSYPHCFAGGSMLQVTRK\*

>SPSA8\_v1\_1000001|ID:41146469| protein of unknown function [Spirochaetes Bin 1 SA-8]  
MFICEICGEEFEDEDESDWPX

>SPSA8\_v1\_1010001|ID:41146470| protein of unknown function [Spirochaetes Bin 1 SA-8]  
MRKRFDEQFKATVALEAVKVTANFTPSTNF\*

>SPSA8\_v1\_1010002|ID:41146471| transposase [Spirochaetes Bin 1 SA-8]  
MYFKKDRAIHLVVGMTDMRKQINGLAQLANEHKPDCVFAGDYFVFLGKTRKVMKVLYWDR  
TGFLWTKRLEEATFPWSRKRKGSITLERDKFKLLHGDIFREHTEQHNYSVL\*

>SPSA8\_v1\_1010003|ID:41146472| transposase [Spirochaetes Bin 1 SA-8]  
METVLPENVESLKKLVIEQARRAYELEKTSKKLQEELAALKLQLQVTEEQFALLQRK  
FFGATSEKRSKEHDNPKQALLFNEAETYAEEPAPVKKPSEASHERKAVGRKPLPGNLER  
REIVHALSEAERTCPACGAIRPEIGQEVREELAFIPARFVVNSHILKKGPCQCAQCQHP  
IIQAPGPAKLIPGSSFSNHTVAFFLTSKYVDAQPFYRMEGILSRWGIETSRASLCKLAIA  
AGRAIGDLVEVMKTDLKASPVLMQDETUVQVLHEKNRSAQSNSYMWVARGYADRKPVIFF  
HYHPSRAKAIQAGFLTGYHGFVQTDGYPGYNDIGQSDAMTHVGCLAHVRRKFFDAEQQS  
TEARHMLDLIAELYHAEKILRDRIESGEYTAFAFVRIRKQEQEQRLAAMRDWLQKQKQGS  
PPSLAFGKAVTYALGQWETIGHYLEHELLTPDNNFIENAIRPFVIGRKNWLFNTPLGAH  
ASAGIYSLIETAKANGHEPYHYLCYLFDELPAKSMEDKRALLPYRLAPGAY\*

>SPSA8\_v1\_1020001|ID:41146473| Extracellular solute-binding protein family 1 (fragment) [Spirochaetes Bin 1 SA-8]  
MKKFVLVVMALLAATMSFAAGKLTLMQNKPEIDAQLKAYAQAQWQKNGVTVVVKSIGGTS  
GGMGPQLKADYAAGDMPDIFAFDGLEAYKEWEGVILDLSNEPWVKSTSVAFKYNSKIFGF  
PVAVEGWGMAYNADMLAKAGIDPKTLVNYDGYKKA FEKLD SMKAQLGINSVVSMAAAVEM  
GWVTAHNFNSLLSNGLPYGDLSVNVNALLAGNVDMQRLQEYADWVELLFKYADKSVLLTG  
NYDAQVGAFATGKAVFLHQGNWTDPNIKGANATFKMAFAPHGSMKKATDGIFVXX

>SPSA8\_v1\_1020002|ID:41146474| protein of unknown function [Spirochaetes Bin 1 SA-8]  
MKIKLIHDWITLSVNYDVAMLERGVVTGQDIRTVLSARKAVCSGYSKLFETMASAAGFEA  
KTIHWARGLSGNFEFTPRNSHAWNMVNISGQWLFVDTTFDAGAFDGRYKQRYSTDYLF  
PGPEQLQYTHFPEDPSDQLMSRPIDRSRFINQALFLPEFFKLGLSVPVAVSANPGQFMPAL  
VKAADRYNLD FEAPPDVMLDASVFSSDGGEIGGSVMLSLRAAGKWRISFAFPKAGTYKAL  
IFAGKTSTREASGSTALLPGKSEEKLSVLSFAFQTSKGNVEFPAPRQYASFFERAGEYL  
ESPITGVLKAGMSAKFVYISNAKKVSLIHDGNFIPLDENPASPGRFELELVKPKTELLKL  
GVSEEDGVNFSIMLSWSVR\*

>SPSA8\_v1\_1030001|ID:41146475| protein of unknown function [Spirochaetes Bin 1 SA-8]  
MRGDLVYAEPAPSLLSFNPRPCMRGDVTSSHRA YFDTKFQSTPLHEGRLFQSTPLHEGRP  
KVPDELKGTIEFQSTPLHEGRRCFIAVSM\*

>SPSA8\_v1\_1040001|ID:41146476| conserved protein of unknown function [Spirochaetes Bin 1 SA-8]  
LHLRRCSGLENPTGIETELLLKSLRFIDDRCSGLENPTGIETWSFSSAKANYI\*

>SPSA8\_v1\_1040002|ID:41146477| protein of unknown function [Spirochaetes Bin 1 SA-8]  
LECVQCVGHVAADLKTRQGLKPSRAASHNDRDGVAAADLKTRQGLKHIILDIDLRPNQVA  
ADLKTRQGLKL\*

>SPSA8\_v1\_1050001|ID:41146478| Uncharacterized ATP-dependent helicase YprA (fragment) [Spirochaetes Bin 1 SA-8]  
MRTIGAQLPSLSPLPQGLHEKIASALLQRGISSLYTHQARAYQKARARC�FVVVTPTASG  
KTLCYNMPVMQSLLENPEARALYLFPTKALSQDQQAELNEISLGGAMPVRA YTYDGDTPA  
SLRSIARTQGRIVITNPDMLHAGILPNHTKWIAFFSNLNYVVIDEMHTYRGVFGSHVGNV

IRRLKRIAIFYGSKPCFILSSATIANPQELASMLIEDEVELIDENGAGTSEKTIYYNPP  
ILDSLQGIRRSSALESENITLKLKSMGIKTILFARSRLKVELIASYLTEHLANRFNDNSH  
IRISPYRSGLLPERRAIERGLRDGSIQGVVSTNALELGIDIGGLDAAVMAXX  
>SPSA8\_v1\_1060001|ID:41146479| protein of unknown function [Spirochaetes Bin 1 SA-8]  
MQLQKKKTGIPRDIAEFTMYTVIMKRIKAAPSRLAGLFLIFILASCASSAETTGAANKPV  
VIDASAPLRLYRTDKPDSRVTVLSQSMASFFQKSADPERALREFTAQLVKGESDPYMKIK  
LIHDWITLXX  
>SPSA8\_v1\_1060002|ID:41146480| protein of unknown function [Spirochaetes Bin 1 SA-8]  
VVSADDAQDARIKIRNNPASLLGAAFILFMITVYIVNSAMSRGMPVFFFCNCIRLL\*  
>SPSA8\_v1\_1060003|ID:41146481| protein of unknown function [Spirochaetes Bin 1 SA-8]  
MNNKELAKLENGFSLIARYSDILCSADSIEKAFSEICTDIGILTGSNRAVIYENINDEQS  
FSTRCVMRGSWTAESSPLEPEFPFSWMRASSEDLAVAARIRTFKDRKAVQLTAGEFPE  
SLNFSVNAYDMHNAACLMPIFVDNSIWGEIVLTS DIPGKTWDEIDFAILKSLAEILPSGVD  
RFKNELTNQEARIEQEILFENRIAGNXX  
>SPSA8\_v1\_1070001|ID:41146482| membrane protein of unknown function [Spirochaetes Bin 1 SA-8]  
MHGFYFAYYVVAFLPAILMFLSRNHRAFEMVFTATLMYYVHYLFFMFFPADGPIPEREHL  
FQNGYVFIPIMNAIYHYSQQGGGAFPSTHVSLAVIIGIYTYRYFKPIRTLIVVLCVGI  
VATVYCSYHYXX
