# Supplementary material for: Fermentative Spirochaetes mediate necromass recycling in anoxic hydrocarbon-contaminated habitats
Source: PubMed Central journal article supplement (PMC6052044; doi:10.1038/s41396-018-0148-3), 2018-05-30
Supplement: 41396_2018_148_MOESM10_ESM.pdf [file 41396_2018_148_MOESM10_ESM.pdf]

>SPBDM4\_v1\_10001|ID:27157205| conserved protein of unknown function [Uncultured spirochete bdmA 4]  
MVYRSESWKKYIPDDIKAKYEIYDYKHAAAILYSEFPEHFKEVCSVLRQFKITKDDITSR  
GGNESNIPKKFSDILRPLGWEEKQLHAKVIVDDHEISHDTHWVDYLKGRVAFDLEWNSKD  
QTYDRDLYAFKSFFDYDKISVAILVTRSTDNLNHYFSELGSYFANDGTERKYMAYGASTT  
QMKGKLLPRLEAGRNGGCPILVFGITRKSIIIEP\*

>SPBDM4\_v1\_10002|ID:27157206| protein of unknown function [Uncultured spirochete bdmA 4]  
LGCISLFRFDALPFFSRLIKEEDEMRRRKEINAFQETTATAFRRTCA\*

>SPBDM4\_v1\_10003|ID:27157207| Addiction module toxin, RelE/StbE family [Uncultured spirochete bdmA 4]  
MSSEKFTVLIYPTAEKDLFEIKEYFETTLKTSAIPLFEKFYASIDILETNPYIHPLLKDA  
YLQQQLGYRMIPIDNFLIFYIVKDGVVQIHWFLYGKRDIYSHIL\*

>SPBDM4\_v1\_10004|ID:27157208| Prevent-host-death family protein [Uncultured spirochete bdmA 4]  
MPIIRPISDLRNNFASISEAVHAENEPVFLTKNGSGDMVMSLEYEYEQQLARIELYQKLN  
EAREEIRNGATGKDARTVLQGFHMS\*

>SPBDM4\_v1\_10005|ID:27157209| protein of unknown function [Uncultured spirochete bdmA 4]  
VRVTCERALRQQVGAIVASYAAAPLFSPLSYLGA VFLFYPEAPQKACQERESGSRGCSA  
QKPIFEFLYIIRINHRNTGAFLTFKLGFSYLSFQRRR\*

>SPBDM4\_v1\_10006|ID:27157210| SMC domain protein [Uncultured spirochete bdmA 4]  
MIESLRIIGYKNLTDFAISFKPGINIIGDNDAGKTTILEALNLVLTGTLLGRSIFTEIS  
PYIFNNEIVKDFVNKIGTPECIPPQIIIEAVFQDTEETTRYRGINNIERNVPGISIID  
LDKEYAEEYVQYIKNKEEVHSPTEFYGVSWSSFFNGNPVGGRSNPIRSTYIDATSIRFSS  
GSDRFINKVINDALTEKEKAQLSIEYRKLRETFKIEGVKTINTSLSEKGREITKKDFLV  
SIDISAKSGWDSVLIPYLDIPFQFIGMGEQSKLKIGFALNATLEKTSVFLIEEPENHLS  
FTNMANLIDQISEMCNERQVIISTHNAFVLNKLGLDNLKLLHNKNVSLAELNPSTVTYF  
KRLPGYDTRMLAKSVILVEGPTEELLIQRYFLDKYGTLPVNNGVDIISVRGLSFKRFL  
EISKHLKIETKVITDNDGDIEAVKNKYADFDGIDSIRIIPNDNAISTIEIAFCNCNTID  
TLNTILEKKFKNIEEAKEYMLKNKTEWALKVFESSENIYPEYIQNAI\*

>SPBDM4\_v1\_10007|ID:27157211| conserved protein of unknown function [Uncultured spirochete bdmA 4]  
MPSKNIITIAAAGSGKSTGIVREASNTSKRILITFTVEGTEELKRIFIEQNYAIPKNV  
DIMSWMSFLLQECIRPYQLSTFNRTVSRPIFVQGRSTKYFKKTDARYFFGTEDCIFSDKL  
ADFAILCNIKTSKGVIKRLESMYDLIFIDEFQDFAGYDFDLVIELLKTNISIRIVDPDRQ  
GTFSTNESARNAKYKKAGVIKLEKLEQNGLC EIVLNNWSFRCNQELCNFSDSIYPKYEK  
TISKNFVKTDHDGVYVVRGNQLNEYIMKYNPVVLRYNKKSJWTDDKIKNFGAVKGRTYDR  
ILILPNKPIINYINGQPFISSPAKYVAFAKYSVAILYDDELKHPMIKEWKT\*

>SPBDM4\_v1\_10008|ID:27157212| CopG-like domain-containing protein DNA-binding [Uncultured spirochete bdmA 4]  
MTSVRLPTDLERKLEMIARKKRTSKTNVIREALETLFTQEETEKDSYELGKEYFGKYGSG  
DGSLSTTYKNKLKEKLVNKHSH\*

>SPBDM4\_v1\_10009|ID:27157213| conserved protein of unknown function [Uncultured spirochete bdmA 4]  
MLNTILIDAGPLIALFDKDDKYHAQVKEFIKQKGYRFITTTAVITEVTHMLDFNVDVQID  
FFEWVVKDGVVLQEIEQKDISRIIALTCKYRDRPMDFADATL VIAAEKTGIKNIISIDAD  
FDIYRLPGKVKIENVFKKQ\*

>SPBDM4\_v1\_10010|ID:27157214| protein of unknown function [Uncultured spirochete bdmA 4]  
MSKQYTGFLFADFYDLIQTNCYELPAYIEFMKTYGNTILELGS GTGRLTIPLAHAGARITG  
LDINDDMIALCQRKINDAIKNNIKIIHGDMTNFHLSDSFDL VVAPCNAINHLLSLDELTK  
MLLCVRDHLRPNGLIIDNSLPRVDELLKSNGELEINDFVNKEKNTVIRDYYVANYDFVN  
GLE YDHIKLEEYANNSLMRVEEIDETTAFYYPRELRYV LMSNDYTIEREIGSLKNGTKLT  
KESKEMVFICSKN\*

>SPBDM4\_v1\_10011|ID:27157215| Histidinol phosphate phosphatase HisJ family [Uncultured spirochete bdmA 4]  
VIDCHVHIERGPYTREWINEFINQAKSREITDLYLLEHTRFREFQECYEEVAHYSEYQN  
DWYKRRSGVLLQSYINLVKNYKEKPHHGINIKWGLEVCYLPGIEKIIQLKKNNTFDYFT  
GSIHWLNGWGFHDHKKFEVWKEIVNDVYKQYFDTEVRLIQSELFDYIAHPDSIKCFGHYPT  
YELDEEYEVKVIHVAKSTTIQFEQSCGLYNNYGHNKIGLEENFLKCLKENGIQIITASDAH  
RPEDVGRNIEKALALINEA\*

>SPBDM4\_v1\_10012|ID:27157216| protein of unknown function [Uncultured spirochete bdmA 4]  
VYQLFIKWLSRMSMTNITCA\*

>SPBDM4\_v1\_10013|ID:27157217| Adenosine monophosphate-protein transferase SoFic [Uncultured spirochete bdmA 4]  
MYQFYKYRYQLLTYVLCRIIGFMSSFNPFQPYNTLPLLPPDLAKTEIIAILKQETNAAA  
ALAELKGLANIIPNQAILINAIVLQEAKDSSEVENIITRDELYKALSTTIKKYDPATKE  
VMYYREALNEGFQKVSQRHLISLSDILHLQQTIVKNDAGIRKLPGTALVNDTTEEVIYTP  
PDGEAILQTLMANFMEYLNNDERSLTKLAILHYQFESIHPFYDGNNGRTGRIINILYLLK  
EYLDIPILYLSSYIKNKSMYYKLLHDVTSEGAWEPWILFMLKGIEETSHETLLKIKHIK  
ELLELTIEKVREQASKIYSKELVETLFVNPYCKVEFITKSVGVERKAASRYLHQLADIGV  
LAVYKVGKENIFINSTLIDILKQ\*

>SPBDM4\_v1\_10014|ID:27157218| transposase [Uncultured spirochete bdmA 4]  
MPWRMESMQLQKKFITLWETGRFTKTYLCEEFGISRPTGDAIKRYQEVEGWDALEEQPR  
GHKSHPTTTTKTIEDAIINERKAHSNWGGRKIRVLLLRTYEEAEVPSSETTVNNILKKHGL  
TVPRKPPRRKLLKSEPKFDPQLPNQIMSADFKGKFRMGNGQYCNPLTIADSCSRFLFAIV  
GLERPDTESSKPIFERVFREYGLPYQLHTDNGPPFGNAASLRRMTMLSVWIMELGITPVY  
SDPASQQNGRHERMHRDLKAEATRPPGSSMVAQQRKFNHFREEYNTIRPHEALGMKTPA  
EVHTWSSREYPRRIRDWDYEKDIPTKMVTVNGAIRWKDKGFAMISTALGGKYVGLHPVDD  
GLWL VYYRHVALGYFCEQTMKVYELNDFDF\*

>SPBDM4\_v1\_20001|ID:27157219| Methyltransferase type 11 (fragment) [Uncultured spirochete bdmA 4]  
MTLAQHTKGTITGLDIFPDFIEKFNRNAEKLGLQNRVKGIVGSMDNLPFQNEKFDVIWSE  
GAIANIGFQKGLNYWKGFLKKGDIYAVTYESWFTDERPTEIEKFWVDAVPEIDTIGHNIS  
IMQKAGYSLVAAFTLPETCWTDTYFNPQKAIQKPFLEENTGNKAAEAFVGYMNHEAELYS  
KYKPYGYVVFYIGKKV\*

>SPBDM4\_v1\_20002|ID:27157220| protein of unknown function [Uncultured spirochete bdmA 4]  
MTKYFKYYVFSILISILLVLGCKNITQTNPTSSTDNNTIFNITSMRRDTTTNVIEVRI  
DTFPSTWGNWQMYLNGKEVSMEGNAGEIVVRPNAALDSAPTGLFIGTLPWLTGLDGIDFP  
MEGALQFYIPGKGYSNKFYYNLKDQTFDDSSADTTHNWINHYGDLVIENNETRSIENEK  
YFQQGNIYVNDNSKLIKNSQLMMGRGDVPTIHVYIIVAPNASVEIENSKIFPDSGLVCV  
LNKGNVTITDSPTSIHYFDMSDGAHLTMINSEMVFITIGLLQVTGGETTVVNSTIGALGL  
KVPANAHLNVSNLSSGVYFDSWDVHSMIPEADYTLTLTKTQILKDDFTGDLEHGPERGW  
IFFLDPDAHVRANSELRKVFIDVIDDNATFENLKVGPSSLKYRDIELTNVTVMGQWPF  
YIKDSKVTINNSNYLFLQPTGTSTVSVNDSHICEFIPREFSGTMEFRNGLWTTAGEIIGD  
VAYHSMNSNDFSIGSLKIGDGIQDNLQWKDATVTREYDIHVVKDGTPLSGVLVQMDGQN  
VSTSDGKAKISIQFDEYNFKQNMILKISLPNNTTTETEISFFSETPIKVIIE\*

>SPBDM4\_v1\_20003|ID:27157221| protein of unknown function [Uncultured spirochete bdmA 4]  
MNMDFWGFGFYGVSAIFSLPFYIKVIREEDRMQRKNEIGAYNEALPKTSRITCA\*

>SPBDM4\_v1\_20004|ID:27157222| putative toxin-antitoxin system, antitoxin component, ribbon-helix-helix domain protein [Uncultured spirochete bdmA 4]  
METKLTCLKDKTVIQSAKQYAHHRNRSLSKLVEDYFRNLVASDTQQKSHFSPLVEELSGV  
ISEKDLNLSYTDYLEAKYE\*

>SPBDM4\_v1\_20005|ID:27157223| conserved protein of unknown function [Uncultured spirochete bdmA 4]  
MNNTLFIDADVILDLLCKREPFYVFAAEVFTLGDKGKLHLATTSLVYANVFYILRKVLGI  
EKAKELLRKLRLIVHVIPIDEKMVDLALNSSFSDFEDGLQYFTARENDIGIILTRNIKDY  
KEKELLIQTPEEFLKTLPIKNKA\*

>SPBDM4\_v1\_20006|ID:27157224| Histidine phosphatase super family protein [Uncultured spirochete bdmA 4]  
VTEIYFVRHAESDFLVTDEQRRPLTPKGVSDLEKLVKLFRITYTIATYSSPYTRAIQTVK  
PIAEVKGLMVIKEDFKERISKSNDWIDNTGDLTTFVEKMWEDHRKSIDGGESIIEVQERN  
IKELRNVIKENENRKVIIGTHGTALASIMNYYDEKFTYTD FMHFIGKMPYVIKVMVMDGDV  
FISLEEIAI\*

>SPBDM4\_v1\_20007|ID:27157225| Histidinol phosphate phosphatase HisJ family [Uncultured spirochete bdmA 4]  
VIDCHVHIERGPYTREWINEFINQAKSREITDYLLEHTHRFRFQECYEEVAHYSEYQN  
DWYKRRSGVLLQSYINLVKNYKEKPHHGINIKWGLEVCYLPGIEKIIQLKKNNTDFDYT  
GSIHWLNGWGFHDHKKFEVNDVYKQYFDTEVRLIQSELFDYIAHPDSIKCFGHYPT

YELDEEYEVKVIHVAKSTTIQFEQSCGLYNNYGHNKIGLEENFLKCLKENGIQIITASDAH  
RPEDVGRNIEKALALINEA\*

>SPBDM4\_v1\_20008|ID:27157226| protein of unknown function [Uncultured spirochete bdmA 4]

VYQLFIKWLSRMSMTNITCA\*

>SPBDM4\_v1\_20009|ID:27157227| Adenosine monophosphate-protein transferase SoFic [Uncultured spirochete bdmA 4]

MYQFYKYRYQLLTYVLCRIIGFMSSFNPFQPYNTLPLLPPDLAKTEKIAILKQETNAAA  
ALAELKGLANIIPNQAILINAIVLQEAKDSSEVENIITRDELKALSTTLKKYDPATKE  
VMYYREALNEGFQKVSQRHLISLSDILHLQQTIVKNDAGIRKLPGTALVNDTTDEVIYTP  
PSGEDIILTLMTNFVEYLNNDERSLTKLAILHYQFESIHPFYDGNNGRTGRIINILYLLLK  
EYLDIPILYLSSYIKNKSMYYKLLHDVTSSEGAWEPWILFMLKGIEETSHETILKIKHIK  
ELLELTIEKVREQASKIYSKELVETLNFVNPYCKVEFITKSVGVERKAASRYLHQLADIGV  
LAVYKVGKENIFINSTLIDILKQ\*

>SPBDM4\_v1\_20010|ID:27157228| transposase [Uncultured spirochete bdmA 4]

MPWRMESMQLQKKKFITLWETGRFTKTYLCEEFGISRPTGDAIKRYQEVGWDALIEEQPR  
GHKSHPTTTTKTIEDAIIKERKAHSNWGGRKIRVLLLRITYEEAEVPSSETTVNNILKKHGL  
TVPRKPPRRKLLKSEPKFDPQLPNQIMSADFKGKFRMGNGQYCNPLTIADSCSRFLFAIV  
GLERPDTESSKPIFERVFREYGLPYQLHTDNGPPFGNAASLRRMTMLSVMWIMELGITPVY  
SDPASPPQNGRHERMHRDLKAEATRPPGSSMVAQQRKFNHFREEYNTIRPHEALGMKTPA  
EVHTWSSREYPRRIRDWDYEKDIPTKMVTVNGAIRWKDKGFAMISTALGGKYVGLHPVDD  
GLWLVEYRHYALGYFCEQTMKVYELNDFDF\*

>SPBDM4\_v1\_20011|ID:27157229| putative GCN5-related N-acetyltransferase [Uncultured spirochete bdmA 4]

MKIDLVDVRFEDIKDIILNITSYSSLIDSYEDHVIKSKHYKISVDNEMYGYLSIFDEK  
MLTQYRLLERYLPLANKVFEELINKNIFSEIYVSTSDKNLLTVALDYYKTIDVQDYVFQE  
SQINQCDINFLVKKALKEDKELIVENSNNFFKFVDKNIDCGELYIGRYKEELVSFGIEN  
SKLYKSVASIGIFTIEKERGKNYGAMTIIRLVEECHRIKIEPIAGCFSKNKYSRNAAFKA  
GMYSNTRLLKIIL\*

>SPBDM4\_v1\_20012|ID:27157230| Bifunctional deaminase-reductase domain protein [Uncultured spirochete bdmA 4]

MANFVYIACSLDGFIAKPDGNLDWLNTPNDNDDYGYSSQFIERIDGIIMGKNTFEAVVG  
FPEWPTYTKPVFVVSNSLKSIPPEEVKGAIEIVHGDRIKIIEDLKRRGIKNIYVDGGKTIQF  
FLKEDLIDEMIITTVSKIIGDGIPLGRIGIEKTFKVKKIERLNEYLVKTYRREEI\*

>SPBDM4\_v1\_20013|ID:27157231| Toxin-antitoxin system toxin component, PIN family [Uncultured spirochete bdmA 4]

MKVVIDTSVLYQALYSSSGASHAILQLVRTDDIKLALSIPVFEEYCDVLLRDTSLRAFGL  
SHDDVQKFLDFIALIGVKTDIRYLLRPNLRDENDNIFLELAFASGSHCVITKNTRDFMYR  
PELRFEEIDILTPAVFMENWRNQYA\*

>SPBDM4\_v1\_20014|ID:27157232| Ribbon-helix-helix protein, CopG family [Uncultured spirochete bdmA 4]

MPKTNIMTIRVPEELKEQIENTALLQGVSIHQFAVYAFTKELSELENSHYFKKYLHGKCK  
TDILKGFDEVMQKVKKREVESWDRLEESNA\*

>SPBDM4\_v1\_20015|ID:27157233| protein of unknown function [Uncultured spirochete bdmA 4]

VYQLFIKWLSRMSMTNITCA\*

>SPBDM4\_v1\_20016|ID:27157234| Adenosine monophosphate-protein transferase SoFic [Uncultured spirochete bdmA 4]

MYQFYKYRYQLLTYVLCRIIGFMSSFNPFQPYNTLPLLPPDLAKTEIIAILKQETNAAA  
ALAELKGLANIIPNQAILINAIVLQEAKDSSEVENIITRDELKALSTTIKKYDPATKE  
VMYYREALNEGFQKVSQRHLISLSDILHLQQTIVKNDAGIRKLPGTALVNDTTEEVIYTP  
PDGEAILQTLMANFMEYLNNDERSLTKLAILHYQFESIHPFYDGNNGRTGRIINILYLLLK  
EYLDIPILYLSSYIKNKSMYYKLLHDVTSSEGAWEPWILFMLKGIEETSHETLLKIKHIK  
ELLELTIEKVREQASKIYSKELVETLNFVNPYCKVEFITKSVGVERKAASRYLHQLADIGV  
LAVYKVGKENIFINSTLIDILKQ\*

>SPBDM4\_v1\_20017|ID:27157235| transposase [Uncultured spirochete bdmA 4]

MPWRMESMQLQKKKFITLWETGRFTKTYLCEEFGISRPTGDAIKRYQEVGWDALIEEQPR  
GHKSHPTTTTKTIEDAIIKERKAHSNWGGRKIRVLLLRITYEEAEVPSSETTVNNILKKHGL  
TVPRKPPRRKLLKSEPKFDPQLPNQIMSADFKGKFRMGNGQYCNPLTIADSCSRFLFAIV

GLERPDTESSKPIFERVFREYGLPYQLHTDNGPPFGNAASLRRMTMLS VWIMELGITPVY  
SDPAS PQNGRHERMHRDLKAEATRPPGSSMVAQQRKFNHFREEYNTIRPHEALGMKTPA  
EVHTWSSREYPRRIRDWDYEK DITPKMVTVNGAIRWKDKGFAMISTALGGKYVGLHPVDD  
GLWL VYYRHVALGYFCEQTMKVYELNDFDF\*

>SPBDM4\_v1\_30001|ID:27157236| CopG-like domain-containing protein DNA-binding [Uncultured spirochete bdmA 4]

MTSVRLPTDLERKLEMVARKKRTSKTNVIREALENLFTQEETEKDSYELGEEYFGKYGSG  
DGSLSTTYKNKLKEKLGKYGKSH\*

>SPBDM4\_v1\_30002|ID:27157237| conserved protein of unknown function [Uncultured spirochete bdmA 4]

MVNTILIDAGPLIALFDKDDKYHAQIKAFIKQKGYRFITTA VITEVTHMLDFNVDVQID  
FFEW MVKDG VVLHEIAQKDISRIALTKKYRDRPMDFADATLVIAAENTGIKNIISIDAD  
FDIYRLPGKVRIENVFKQQ\*

>SPBDM4\_v1\_30003|ID:27157238| protein of unknown function [Uncultured spirochete bdmA 4]

MIDHFMEELKELYIKEDKEEETYKNEESTLSLVLENLANELKEDYTLTPLL VQYIWSEQR  
GEHYTTACQVDLVVPSPS\*

>SPBDM4\_v1\_30004|ID:27157239|aldA| putative aldehyde dehydrogenase AldA [Uncultured spirochete bdmA 4]

MRTFEEVKKFIDGSYKLFIGGKWVDAIDGGTFKVTCPFNGEVLATCAEGNAKDVDAAVKA  
AWKAWPAWSKTSQAERAAILNKIADRIEANA EKIAWADSLEV GKTNNPFGWGNFRYYAG  
AALTYEGIANSTIDHHVNLVLNEPIGVVGEISAWNAPDFACMKIPPALAAGNCIVYRPS  
SHTPIGTLMLAQLAADLLPPGV LNVVTGPSPTCGQAILDHPGIHKVSFTGSTETGINVAT  
AAAKKLIPATLELGGKSANIFFADCDFEKAVAGMSMGIFALAGEVCVAGSRIFVQEDFYD  
KFNVA AVAAAKSIKVGPAWDPTTQMGAIIEYEQMQKILNYVEIGKKEGAKVLCGGHRLTG  
GIYDKGFYMEPTLLEGTNDMRVAKEEILGPVGVIIKFKTEEEVIAMANDSTYGMGGGVWT  
KDVKRAFRVAKDVRTGNM WVNTYLQIIPGYAFGGYKKSIGREM HKSTLDHFSQKKSIVF  
NTSDTELL\*

>SPBDM4\_v1\_30005|ID:27157240| NADH oxidase [Uncultured spirochete bdmA 4]

MALQNLFSEGRIGTLTLKNRVVFPFMGTNFPEDKVS KSLIDYHVARAKGGCGLNIVEIA  
AVHPTSRGTRTLGIYDDKFIPGLKTLADAIHEAGGKAAVQIWHAGRQTNSAVTGLPIVSA  
SPIPCPLCQEMPRELTLKEIKELVEAYGDAALRAKKAGFDAIELHG AHGYLIAQFMSPYS  
NHRGDNYGGSLENRARFALEIADVRKKVGNDYPVLYRLSSEERVKNGLTFEDTKKIAKL  
IEKAGVD AIHVS VGVYETLHYTVPPIDL PVGFNVP GAAAVKSAVHIPVIAVDRINDPVLA  
DQILRDGNADFIAMGRGQIADPELCNKAQRGDFDSIVK CIGCNQGCVD RLLMQGLSVSCL  
RNPSTGRESEYAIKPADKRKKVLVIGGGAAGLEAATLSRRGHEVILCEKNDSLGGQFFL  
AGVAPGKKEMSDAALQMGRTA EKTGV AIRLGT ELTEELLGEINPDEVVVATG SVPIPEI  
PGNDKPHVVT AIDVLK GKKTGNSVAVIGGGLV GIEVAEYLREK GKKTIVEMLDEVAKE  
LGM LRRPFAFYIKEHAIEVYTSATCTEIKDNSLVIEQNGKRKEIGGIDTVVMATGVKPY  
NAVVDILKKAGCTYHTIGDASASGKALDAIWAGASIGRAI\*

>SPBDM4\_v1\_30006|ID:27157241| conserved protein of unknown function [Uncultured spirochete bdmA 4]

MENLEEDSLYPTLLNALITGGLEPIAQAAF DYLKHPFILVDAEYNRLVQIPNEPIGDMIW  
DSIWENDGVPLNLLQLFSDEHLLQKNYNSNKSFFANWGSLEKCPRILSNISVKN SIVGYT  
ATLYLHDAC TEHDLA AIDLISQVFAIEFQRQNLHVTEVHTMWALFLTNLFEGKIKNHKDL  
AQWELYTKHSLNRDFCVVAAQPYKGTSEQSSLPYIRKSIESFYPLLHPVISDEYLYFLLS  
DISSNHSYESELKSLVANLADYNLHIGVSYRFSVDVLDIGIYKDQATLAVANGSSSADPSH  
VYFYQDCALGEFFLGASEHMNKQNYLHPAIHEL RDYDKEKNTDY LHTLSVYILSMCNASE  
TLKQLHIHRNTLPYRLRAIEKIANLDLNDARTCAHLLCSFYLLQYAE\*

>SPBDM4\_v1\_30007|ID:27157242| Predicted DNA-binding protein with the Helix-hairpin-helix motif [Uncultured spirochete bdmA 4]

MTTADKIGILADAAKYDASCSTSGSARKNMRGGVGTGAVGGICHAWAADGRCISLLKVLL  
SNTCAYDCVYCVNRRSNDIRRTAFEP EELVRLIMDFYRRNYIEGAFLSSGVIGCPDGTME  
RLIHIARTLRTREHFNGYIHIKIIPGT SERLVLEAARWADRASVNIELPSSASLVQIAPD  
KKPEAIFGPMRALARASGFESRLLA EHPQAENRKL PDMTPRLASGQVGH IAGAPTPTPEI  
ARSNYPNPPSPGRDRSPLSLVMEARKKRLRNPEADIIPAGQTTQLVIGASPE SDATIL  
ALAENLYLAFDVRVYYSAFIPTGNDPRLPVV GKPPLAREHRLYQADW LFRFYGFKANEI  
LDPAHPFLDMSLDPKSSWALRNPGIFPVEINTADYNVLLRVP GIGPKSASRIIAARRCGT

LRIASLAALGVVMRRARWFITVSGKLAAKEFDEISMRGWHLLEHPELLRRVLLDPAFRDE  
PSSQLEFQWETD\*

>SPBDM4\_v1\_30008|ID:27157243| conserved protein of unknown function [Uncultured spirochete bdmA 4]  
MGYAEQHTVIRYDGSFAGLLCAAGEASTISLKQQEGLYFKNQIEEEELFEESFFIRTDLG  
HARKLWKKVAAKGYATSLRTCFEAYCSDGPNKDNHTGRVLCAILREADSSERGRPHGRAPA  
PGNLATLDNLNDPDLVATVAARCRNQAQKITGLIRFSELDGLWYAAISPDCDVLPLI  
APHFALRFAPCSFMHDLQRSIAIVHEPGMVWHIIGGVSLPNSMNVSDLPCTEREFLTRE  
NWWRYFSSVAIEARRNPRLQASFMPPKYWAGLPEMCHDKVSDSSRLPSKKEVP\*

>SPBDM4\_v1\_30009|ID:27157244| conserved protein of unknown function [Uncultured spirochete bdmA 4]  
MNSINAEMVFRSTHTLSELVDGPAPGQGTWILDRDPSAGLAGTLDLSLTAQAQRHIIPG  
ESSIVGHANHLLFSLTLMNRWAAGENPFEGADWQGSWKTQTVDDVQWEDLRRKLREQGHA  
WLKALDARDWDEEDFTGALASIAHLAYHLGAMRNMLDTAKQTPKF\*

>SPBDM4\_v1\_30010|ID:27157245| protein of unknown function [Uncultured spirochete bdmA 4]  
MGKGYRQSCGEGKYLKNSWILHDETVSLFPALQNEGTLALKPDFIMILVARTVESLPWE  
RLIIGEPFAVRSSGYVDEGDVYPGKGLRT\*

>SPBDM4\_v1\_30011|ID:27157246| ADP-ribosylation/Crystallin J1 [Uncultured spirochete bdmA 4]  
MQNSKERNTFRKRLDES VFRDKVLGCWLGKNAGGTLGEPWEKKFGVDEMLDVNWYSNIPE  
GGIPNDDELQLIWFQALKERGPITARDLAEYWLDCVMYNFDEYGLSKANLKRGLVPPL  
SGWHNNWFRDCMGSPIRSEIWACVAPGEPRIAARYAFEDALCDHAGGESVFGEVFNAVLE  
SCAFFESDKYHLIELGLASIEGCLTSRSIRDAWEMHKKGVDWRDARDVLKDRYSIPLAQ  
YSPVNMGFQIIGLLYGEDFGDAICRAVDCGWDTDCTAATVGAIGIIEGASCLPEKWMKP  
LGYTISTNLRGTGIRNLRAPTDINELTDQVCAEAKRVLKFWGAEVIEENSSGETGDVASF  
SGMSEFKIDRVAPYEPNVATWDLKTVTVSLRYLDSAAILGDRPSPLELEIHNPHPEAISV  
EVGISLPDAWCVDSPARQGFVLPAYGNVAVYNINASSKDIADSNRGYFTLSVKDRALAC  
AVPLVLLGGSKWLVSHPFEGKTLIEDDCGVRESVPSAPPEGWSTYWRSGNDLSPEPFYDG  
RAGSVFFFNSIWSPEETEVLGVSNTGRMRLWVNGELRHTTVQVTDLRPNLGNNGGDGSN  
YCNVTLRSGWINDILIKLERGEKPLEAHVTLGKPKDKHPKNIGQTCLGLRRACFSWENGER  
L\*

>SPBDM4\_v1\_30012|ID:27157247| conserved protein of unknown function [Uncultured spirochete bdmA 4]  
MKNYSVRGLEVHDWSHVWNFKTMRRYMKFMVENGMNTLVLHHVGVLDLITPAKFLGGGA  
PTDSIFEVYNQIDQNIYRYALRENLNLYRRDFLKQLIKEARQCIDVYIEDKELWFSDFI  
LNYKPELMKNGVLCPSDPFWWEEFLPAKYEELFVALPDLAGVVISFGTGESRLAIANMHS  
CGCDLCQKMPAQWHTNMILGTYGPFKRGKRLVVRDFIYTKEEQEQFAEALQVIPQEVV  
LSLKNTPHDFYPTFPDNPLIGRVGERPQWIEYDVNGQYFGWGVVPSIMFDDIEHRLAYGL  
EHRVSGFFMRTDWEVQDLSCFDGPNLLNLYAAAILGKNPTADRREIVLRWLKGESMLDA  
VSTPMQINATVDWLLSVLEPTWPIMCGAVYVNGTVFSDNSLFHVSFGQPQWVAETHHSLK  
NWFADAEDALGLTAENVQSILGEKESASRSMDEILNVLATGRHALTEAAYNLLSRFELM  
KAYVEGFQLETKLWVFGRLWAENRLDDALAGLDRPVKVCLEEALVKIKEYAASVKDMPQL  
ASYPACVLLNVERMECFIRDTEKKIMATRPLV\*

>SPBDM4\_v1\_30013|ID:27157248| Binding-protein-dependent transport systems inner membrane component  
[Uncultured spirochete bdmA 4]  
MWKRFKKHKVALVGLLILLLLL VVFAEFFAPYGLNETSSYSYASPTQIRFTDAKGKFS  
LRPFVYDAQPSFDLSTGQTSWKVDTTSPHYLRLFIRGSSYSILGLKLDIHLFGAAGGHVF  
IMGTDALGRDVSRLLYGGRVSLAIAFITALFALIAGSLAGIVSGFFGGVADMVIQRVIE  
LFMTIPNIPLGLALAAFLPPDLNPALLIAISMVIALVMWANARQVRGKTLPLRDAVHV  
QAAIALGASTPRILLKHIFPAIYSHLVVVVTLAVPQAMLAEAGLSFLGFGVRPPLTSWGA  
LLQDAQNFRTISLYPWWAVPGLAIAITVLLLNLFVGDGLRDATDPYLN\*

>SPBDM4\_v1\_30014|ID:27157249| ABC-type dipeptide/oligopeptide/nickel transport system, permease component  
[Uncultured spirochete bdmA 4]  
MTGYIIRRIAGIAFVTLFFSTILIFAIKLPDGFVSYAISQSGGEGGLNSIADRMRQSYG  
LDRPVIEQYGRWIGGLVRGDLGYSFLYQQPVKIVWEQMGWTVLITGLSMIFSWSIGSAI  
GIFSALKKYSFWDYFFTAFGFLGLSIPSFFLALIIIVCISAGSGVTGGLFSPEYVVA PW  
SWARFWDLLRHIWIPVVAIGTAQMAQVIRIMRGNLLDVMNQPFIKTARAKGLSERKVIFK  
HAVRIAMNPLISLAGLSAPALISGIVVTA VVLNLPVIGPTFIVALKSQDMYLAGGYLLM

VVLLLIGNILADILLAWSDPRIKFD\*

>SPBDM4\_v1\_30015|ID:27157250| putative Extracellular solute-binding protein family 5 [Uncultured spirochete bdmA 4]

MKFRRVVIALLVMSVLA VMTAAAAPSGTYKEAPQLAAMVQSGKLPVSRPASPVVVKP  
LDSVGGYGGTIRKVVYTG VNDWWNLALFGVRAEPLLAADLEGNIAPNLLESYEYLSGGNVL  
RLHVRKGIKWS DGVPFTVDDIVYDLQTRGNKNMPLESAGLADKVVADKIVKIDDYATDLP  
LKEKYPLEFTIAYDPTVSPKHLYIKFDPRYDSTKIWQDLAMAWSPSRNSAALVNLPLVSA  
WKVIEYVENLRIVAERNPYWYKVDTS GQQLPYVDRVVFNYVASTDTIPAMIKAGQLDFQA  
RHLSLADFPFYKQNESMGYRTAVLPNTNFGPAIHLNYADKNL DLRNLFRTKEFRMALS Y  
GIDRQAISNTLFFGQAKPWGFSPLEGSPANPGNPYSTMYTQYDPSAAAKLLDDLGLRDTN  
GDGFRELNGKPLSIIVDMDKGGGAGPVQVVELIASQWQKIGIRAIANTIDRSLILARWNE  
NSHDAFAWNVNGGIDPLQFTFAWSTTAAPDFMWGNVGVPLNEWQTS GGKSGIEPPAFIKD  
MNQLVLEAQQELNANKRNELARQITKIASENLYKIPTTTLV SVGIVSTKLANVPSTWTDG  
ISVLSRNTQPWFYK\*

>SPBDM4\_v1\_30016|ID:27157251| protein of unknown function [Uncultured spirochete bdmA 4]  
MGIISRK WYRLQISEK WYNAYLNLSSFI GF TSSPQRDSKYRNHEILNIYNYKIICYK  
L\*

>SPBDM4\_v1\_30017|ID:27157252|dppD| dipeptide transporter ; ATP-binding component of ABC superfamily  
[Uncultured spirochete bdmA 4]

MERLLEVDQLKTYFTDRGIVKA VDGFSFSVERGQCLGIVGESGCGKSQTALSIMGLISK  
PQGRIVGGKILYRDKNARTTDLTTLAPT GDEYRAIRGKEIAMIFQEPMSSLSPVYTIGDQ  
IVEALTEHTALPKKDAARRAVELLKTVGIPAAEERVHDYPHQLSGGMCQRAMIAMALSCE  
PRLLIADDEPTTALDVTIQLQILRLKELQKRLSMGLVMITHDLGVIAEIADDVIVMYL GK  
VVEKGPVRKILREP KHPYTQGLLQSRPSGAAGKVRLNPIKGVVPSAIDPPFGCPFSTRCP  
KAFDQCGLPPPFAVWGEDHEAACWLYENLM\*

>SPBDM4\_v1\_30018|ID:27157253|oppF| oligopeptide transporter subunit ; ATP-binding component of ABC  
superfamily [Uncultured spirochete bdmA 4]

MDNKEDKLLLEVENLRKYFPVKHGVFRKTEGWLKA VDGVSFKLYEGETLGLVGESGCGKS  
TTGRLILRLTKPEPDSRILFRDNNELIDITKVAPQDLKHLRTRMQIIFQDPYSSLNPWMK  
VGEIVAEPLVIHKIMAGRELSMKVDALLEMVGLDASYTNRYPHEFSGGQRORIGIARALA  
LDPTLVVCDPEVSSLDVSVQAQVINLLVDLQERLHLSYIFIAHDLGVVRYISTRVAVMYL  
GRIVETGPTEEVFHSPAHPYTEALLSSMLSTDPDSSQKRLQLEGDVPSPINMPSGCPFHP  
RCRYYYQNKWPECVRDIPASTSVSDVHRARCHFTTRLNLHG VGEDSVKIGVKNGLNT\*

>SPBDM4\_v1\_30019|ID:27157254| putative HTH-type transcriptional regulator DegA [Uncultured spirochete bdmA  
4]

MASIHDAHLAAGVSVATVSRVLNSSGSVTDATRAK VRSAMQRLGYTPNPSARTLRNNTG  
LLALITPEIINPYFAAVASGVQDMCRKSKYQLILCNTGGDESIEISYLDLLSNKQVDGII  
IAPPGTHTNPKSDTRIQLNLSKNYPVIMIGKRFDSEDISCDIVTTNTAIGTREAMRHILD  
GGHSRIA YLGGPNPSIAKTRLATFRSSLSANGLIIDENLIFQTNLTLEDGYNICKKLLDA  
AHRPTALFAVNDMVAIGAMIALQESGVEIPTEMIVVGFDDIPLASMFRLSTVVPKYD  
LGHIAAERLIARIEGLVDKFETISLPTHLVIRESSMSQKGMMPKTVL\*

>SPBDM4\_v1\_30020|ID:27157255| Anaerobic sulfatase-maturating enzyme [Uncultured spirochete bdmA 4]

MNTAFFLIKPVSSLCNLACRYCFYHDLAEHRLTRDYGLMDSRTSDLLIERAFDLGVGALT  
FIFQGGEP TLAGLEYFEHFVEKCRACAESDSHHRPQINFSIQTNVSLNAEWARFFKREG  
FLVGASVDGPRIIHDTYRTYRDGSGTWAQVMHGITV LREEGVPVNALCVVNNLTADNAGL  
VYHFLRRRGFDWIQFIPCLAPLAEPEAPYEALNPEAYAHFLKEIFDLRYGEWLRGSGQS  
VRWFDNLVEMAAGLPPESCGMLGCCPMNFTVEADG SVYPCDFYAADEWCLGNIHEL SFQV  
MQEGITAHDFVSSRLIDPVCKTCSAFFLCRGGCRRDREPFSDGK PRLNRYCPAFKEFFQ  
YAGARIMRMAAALKETI\*

>SPBDM4\_v1\_30021|ID:27157256| N-acetylgalactosamine 6-sulfate sulfatase (GALNS) [Uncultured spirochete bdmA  
4]

MSSSSDGEGKSTPQPNVIFILCDDLGYGDPGCYGGASIPTPNIDRLAEQSMMFTQCYAGA  
PVCAPSRCVLM TGKHTGHCTVRDNFAWAEGLPPEGRVSLRRDDITVAEDLK RAGYATGMT  
GKWGIGGAGTEGIPNLKGFDEWFGYLNQRHAHSYFPTYLWKNRERVEFSMSGEEQRGPYS

HDLIVNYALDFMTRNAGSKFFLYLPWCLPHEPYEIPTRYAYPGNDTWSGEEKAYASMVRK  
IDADLGRIMDLLEELHIADNTLLFFGSDHGAARRWEGVFDSCGALRGQKAYLYEGGVRT  
LIVRWPGTIPAGTVCHTPWWYADV RPTIAEVTGSGTPTGCDGLSILPLLRGNTDSLDSRY  
RERLFYWEGYTHGFEQAVRWKNWKALRKTSADGVETSFELYDLASDLAETTNLVEASPEL  
AAELRHQMILSRENTFRWPISFK\*

>SPBDM4\_v1\_30022|ID:27157257| membrane protein of unknown function [Uncultured spirochete bdmA 4]  
MDEKDALKDIADIKALMRGMTTHVNRNAGWFFIVWGIIWIGFMTTQVIGNDARFVWLAL  
NILGIGLSFYLLRRFFGKRGGQMIPGLGRRIFLIFAGTAIFGILVGVLFGISSAEDITLL  
VVLLSGLCYFMAGIVGPAKNLYLGLLLWAASLVGRLAFPSYLP LIVAIVGGATFLGLGIS  
FLLRREL\*

>SPBDM4\_v1\_30023|ID:27157258| Transcriptional regulator [Uncultured spirochete bdmA 4]  
MNDDSLLIHQPTLRIMAALSTLEEGTKVDFTFLSDELEVTEGNLSSHIRKLEEAGLLNV  
EKVVFVDRKPKTWLALTERGRKAFAYVRELERIVRSDARTEP\*

>SPBDM4\_v1\_30024|ID:27157259| ABC transporter related protein [Uncultured spirochete bdmA 4]  
MESVEKVIELAGVKKKFGERQALNGISLSVGRGNIFGYLGPNGAGKTTTIRILLDLLRAD  
TGVVEVLGSPADHLETRRRIGFLLDADGLYDQLSAIENLEFYAALYGCKPRRQSIMKLE  
SVGLADRAEDRAGGYSKGMRRRLALARALVHDPELLILDEPMSGIDPSGQME LRAIKNL  
VKERGKTILFSSHDLDEVERLCNRIALIDKGEIRVAGELGQLLGTGNQGRIIISTSVPE  
PTLLSEMERRLWLKVNGSGPEGLELSLPADVVSFLAARGVVGIEGVR AKHTSLEELYAGIL  
KERE\*

>SPBDM4\_v1\_30025|ID:27157260| membrane protein of unknown function [Uncultured spirochete bdmA 4]  
MSARNALTKMALSELVRSRSYRVAFAVIALFLVGILHFIGVRLLLNPLVERETLDRGLL  
AAASGLVYCTVLICAGLFLNISSTQPLVRAKASGSIESLLAAPVDARDLWRALSISILP  
GIVAGWAGGLVSAIVYELLYLAPRGMTLASPWIILNSFILLPAMYAAIAFLVHAIGLQGR  
ATSGAVIAQIFFPVYTSVMNLGGRDILAVPRADLAAAQLGLSLI AVGAIALSRRGLTKE  
RIVLSCRQ\*

>SPBDM4\_v1\_30026|ID:27157261| membrane protein of unknown function [Uncultured spirochete bdmA 4]  
MQAVSPWWRIA AVYGRDLGEIRKSPASKAILIVFAALSVAVAIGAKLLLDQVLAAGAGAD  
ASVADEIVRKVVGAFLLENSFYGITMLPFSLLVWVFAGAIMREKLTGNLETLLATPLSL  
PEIWLGKTLALSAAATAIGWLSGILEVIAAHCIVAATLSRFVLLSTPAIVAALLNPLF  
FSGMCALILIALAKDAEASLLPSFLIGMGAMIGLPVAIGTGAIKIGSWIFCLYQTGASM  
VLWGAVLAILFTTKKEEVVLSARK\*

>SPBDM4\_v1\_30027|ID:27157262| ABC-type sulfate/molybdate transport systems, ATPase component [Uncultured  
spirochete bdmA 4]  
VSLEASLYLRVASPDFHKPFVLETRY SVAQGEILGLLGPSGSGKSM SLKCIAGIVRPDRG  
HVRLNERILFDSEREIDIPSRERRVGYLFQSYALFPHMNVIKNVAIGIGRRGEESYPEWK  
RRAGRSARQYMEMLHIEHLAFRYPRQISGGQQQRVALARLFASQPEAILLDEPFSALDTE  
LKDAIGDELKKTLLSYGCPVIFVSHNDEEVGRFCSRTIRIRDGRLESPCAEPQKDPQKGL  
AVTQ\*

>SPBDM4\_v1\_30028|ID:27157263| protein of unknown function [Uncultured spirochete bdmA 4]  
LRDSKPLLRILLGLRARRFESAIPYTDRPRTEAPHFLVVVRDEDDGAAIGEQRLLQFVAD  
GILELSIQGGKRFIQDGLRLGREKAGQGNALLLAARNLPGISKSQMFYVEHLHVL PGRS  
AGAALPLGVRFLTAATDTDGHILDYVHVRKEGVRLKEIPNPSFAGRDIYLSLAVE\*

>SPBDM4\_v1\_30029|ID:27157264|modB| molybdate transporter subunit ; membrane component of ABC superfamily  
[Uncultured spirochete bdmA 4]  
MFDLSPLYISLRAAALSSAIVFVLGTVVARLCYTLRGRKAAIVDTILTLPLVLPPTVLGF  
FLLVLFGRNGPFGVLLARMGQKAVIFSWKATVIAAAVVSFPLMYRSARGAFEQIDQELLW  
AGRTLGM AEWKFLHIMVPEAWPGLMAGLALSFSRSLGEFGATLMIAGNIPGKTQTIPMA  
IYFATAGGDMQTAWIWVGIIVAISCVSLTLTTHFDSRRRG\*

>SPBDM4\_v1\_30030|ID:27157265|yvgL| putative ABC transporter substrate-binding lipoprotein YvgL [Uncultured  
spirochete bdmA 4]  
MKKRFFVCLFVLLSLVAGFAQGASKQKTELLISAAASLTDCMNELKAVYMAKNPSIIIRC  
NYGSSGALQQQIEQGAPADLFFSAGLKQMKALADKGLMDTSTVRNILENHVVLVVPKNGI  
KLSSFDDLKPSVTKIGIGDPKSPAGQYADQVFKNLGLSDAISGKLV LAKDVREVLFWV

ETGNVDAGVVYSTDAQISDKVIVSAIAPENSHEKIVYPVGVVVKDSAHPKEAKAFEDFLSS  
DEAVKIFAKYGFAVI\*

>SPBDM4\_v1\_30031|ID:27157266| Molybdenum cofactor synthesis domain protein [Uncultured spirochete bdmA 4]  
VQKGTIKAICASGGKGTAKHPVEEATLKANWGIEGDAHAGTWHRQISLLSASTVDAFNRQ  
GADVADGDFGENILAYGLDFPAFPVGTVLVCGEVVLRMTQIGKVCHSGCDIQKRMGKCIM  
PTEGTFARVLHGGILRPGMPIEAYTAQRVFILCASDKGYAGERNDESTPALQHLVTGQGY  
EVVGTALLPDDREQLSALMARVCDSYAADLLTTGGTGLSLRDVTPEATIDIAERMVPLG  
AELMRLRSLSVTARASLSRAVCATRAQTLIVNLPGSPKAAVENLQTILEPLPHGLAILQG  
TQGECAVDSHI\*

>SPBDM4\_v1\_30032|ID:27157267| Molybdenum cofactor biosynthesis enzyme [Uncultured spirochete bdmA 4]  
MTDGEAGIVGIRDSFGRTHTYLRLSVTEACNYRCQYCGPGVVHRGLSDDHVLLCSLFRS  
MGIRTLRLTGGEPTVRPGLIPLIVRLSSLGFERLALTTNGTSLVRDARALRKAGIQSVNV  
SLDAVDADLYASLTGGFPVRPVLEGIGAALSEGLAVKLNAVLLADTYRSQVRQLMDFAGK  
FGIPLRFIELMPFGDGARCEGVSTATLVAFLGEEYEGEEASVCPQGLGANSVSKGDEPWG  
SGPAEYRRFGGVDVGLIGALTSCFCSRCQRLRLTNEGWLKTCLYHSDHLNLSSELLDRGCS  
QDEMGRGRIADFLTKRLRHAFQSGPVEWPLSSVGG\*

>SPBDM4\_v1\_30033|ID:27157268|moaC| molybdopterin biosynthesis, protein C [Uncultured spirochete bdmA 4]  
MNDAMTHIDENGRAIMVDVSAKEDTKRRAIASGRIFMNRQAFGAIAGGTAPKGDVLAAR  
IAGIMAAKQTPSLIPLCHTLLTTSVQADFRLLPDECAVEAVCTVTSTGKTGVEMEALTA  
TVALLTIYDFCKAIDRSMHVEDVHLQFKDGGKSGRYDRR\*

>SPBDM4\_v1\_30034|ID:27157269| Molybdopterin biosynthesis enzyme [Uncultured spirochete bdmA 4]  
VKLIRTQDAVGHVLCMDMTQIIVGVTKDARFRKGHIVREEDIPILLSMGKENLYVWEKQE  
GMLHENEAAEILCNATKNDHMERSDVKEGKIELRATCEGVLDLERLLRINSLGEVMIA  
TRHNFSGVRKGDKLAGMRVIPLVIDAAKMDRVTAIAGTSNPLLSIRPYVIRRCTVLVTGC  
EVKKGIVEDTFSPVVEQKLAEVGVSVSakilTGDDEVYISSCIKQAVADGEEMVLCTGGM  
SVDPDDRTPKAIRDSGARIVSYGAPVLPGAMFLVSYLGDVPVLGLPGCVMYAERTIFDIL  
LPRFVARIPVTAYDIASLGNGGLCLQCRPCTFPNCGFGNGGI\*

>SPBDM4\_v1\_30035|ID:27157270| Molybdenum-binding protein [Uncultured spirochete bdmA 4]  
MAFSFYVRIPFTSDGAFFGPGVNELLHNIDVANSLSAAANMMGMSYSKGWKIIHVAEKKL  
GYPLTVKNIGGVDGGGSSLTKEGHSFMERYDAFVAESRAAVQVCFERYFPEAQQ\*

>SPBDM4\_v1\_30036|ID:27157271|sodA| superoxide dismutase, Mn [Uncultured spirochete bdmA 4]  
MSFTVPELRYPFDALEPYIDAETMRIHHDKHHGAYVANLNKAVDGTEYASWSIEAIARDW  
GKLPDRTIRAVRNNGGGHYNHSLFWELIGPGAGGKPTGALASAIARDLGGFDFRSEFTK  
TALARFGSGWGWLSLGPDKKLIVESTPNQDNPLAEGHIPLLGVDVWEHAYYLKYQNRAD  
YLEAFYNVIDWKAVAAARFEKAMS\*

>SPBDM4\_v1\_30037|ID:27157272| protein of unknown function [Uncultured spirochete bdmA 4]  
MILYHMNIGFPFLSEKSKICIDSKEVVS RNKKFEDEAEKWQELLAPTEGYEERVFYHRVR  
PDSAGKACIELRNDENPHCGYGLRIRYSTEVLDFHVECLAFCAFSMAQEVCTSDWLLLIF  
L\*

>SPBDM4\_v1\_30038|ID:27157273|vapC| Ribonuclease VapC [Uncultured spirochete bdmA 4]  
MIIADTSVWIDYVRGINAPHTDLLDNELLHDRVATGDIIIVEFLQGFREEKDIKVAKQIM  
DRLEYDFLFGKGMALITAANYRKLREKGVTVRKTIDVIIGTFCIEKGFELLHNDRDFDPM  
EKYLGLKVKR\*

>SPBDM4\_v1\_30039|ID:27157274| conserved protein of unknown function [Uncultured spirochete bdmA 4]  
VRTNIVIDDNLMNKAKKLSGYKTKKETIEEALKLLVAQREQSEIRKFRGKLNWEGNLEEM  
RLDK\*

>SPBDM4\_v1\_30040|ID:27157275| protein of unknown function [Uncultured spirochete bdmA 4]  
VDNADTRLEFGNQFAILYGDRVPL\*

>SPBDM4\_v1\_30041|ID:27157276| Dual specificity protein phosphatase (fragment) [Uncultured spirochete bdmA 4]  
MCACPGASGRNLREDLAAIESWGAGILISLIEEYEFYRFAGVERMPPELVPKYIRHLRLPIA  
DASIPTMDWERTWLREGPSVREALRRGGRIHICMGGFGRTGLLAARILVEFGEEPDLAI  
RAVRIARPGAIETSEQEEYVRNIASQIL\*

>SPBDM4\_v1\_30042|ID:27157277|guaB| IMP dehydrogenase [Uncultured spirochete bdmA 4]  
MGFETLIAEGTGLTFDDVLIVPGYSEILPSEVDISAEVPGMRLKSPILSAAMDTVTDSQ



LGIALARIGGIGIIHRNMSPEAQAAEVYKVKRSESGMISDPVWLPETATLADA EHLMETY  
RISGIPIVDPQNGRLVGIITNRDRRFCGPEDMQKPVSEFMTSKNLVTAPEGTTVEGAKAI  
LRRHKIEKLPLVDRDGRLLKGLITIKDIVKKEEYPSAAVDGRGRLLSGAAIGVGPDL EERV  
NLLLERGV DVLVIDTAHGHTKKVIEAIHRVKA VAPDTPVIAGNVVTAEGTRALIEAGASA  
IKVGVGAGSICTTRIISGAGMPQLSAIYECAKAARSYGVPIADGGIRYSGDIVKAI AVG  
AETVMLGGLLAGLEEAPGELVLYEGRQFKSYRGMGSV GALQGYGRDRYGSQSNGKLVPE  
GVEGMVPIYRGKLS DYLAQMLGGLRSGMGYAGARTLAELRSARMVRITAAAYAESHPSIV  
ITKEAPNYQKRD\*

>SPBDM4\_v1\_30043|ID:27157278|purH| Bifunctional purine biosynthesis protein PurH [Includes:  
Phosphoribosylaminoimidazolecarboxamide formyltransferase ; IMP cyclohydrolase] [Uncultured spirochete bdmA 4]  
MPLALISVYDKTGLVPFAQRLARKGWRFLASGGTAAALRGAGIESVDVAAYTGSPELLGG  
RVKTLHPAFHAGILARPEAADMEELRAHGFEPIDLVVNLVYFAETVRKMKERAGAAAAG  
AVTGNASVPDGA VFSGRGAAA VGGNLRAGPASLDAGSEAEIIEQIDIGGVALIRAAAKNY  
ARVCVLCEPGDYERVAEAE EEGAVQPATRRALAAKAFARTAA YDAAIAAWFGQQDAAEAA  
VSDGEALRGASSFEAALDDVAGSPAPAGATPGAPQNSTSTGVSEGVSLFLAGPPGTKFSF  
GGRIERSLRYGENPHQKAFFVLPEAEGGPLGGRVLGGKELSYNNLLDLDAAWRAVLSFEK  
PAAVIVKHLSPCGAAEAETLRAAYDAALACDPVS AFGSIVALNRPLDVDTAIALKELFLE  
CVAAPAIGTEVRDILKAKKNLRLVEADLAVFGRQAREFRTAAGLLVQEPDCGDPPPAEW  
RAVSARQPSAAEMEALRF AWKLVQHVKSNAIVLAVGCAAVGIGGGQTNRVDAVRQACERA  
GERAVGAVMASDAYFPFADGIEAAKAGVTA VVQPGGSVRDAEVLAADRLGLAVVYTG  
V RHFRRH\*

>SPBDM4\_v1\_30044|ID:27157279| Phosphoribosylglycinamide formyltransferase [Uncultured spirochete bdmA 4]  
MSSPLRIIVLASGEGSNFQALIDAIETHDIESLR IEALICDVPGARCIDRAVQHAIPAYI  
LPAPAGARRGSPERITYDERLAAIAKSFGAELILLGWMRLLSQAFLGHFPGKVINLHPA  
LPGAFP GTHAIERAFEAFQRGNIERTGVMLHLVPDEGVDSGPVLR IAEVPIYKEDTIESL  
EKRVHDTEHREVVALVRDLALNRGIFKEKESNYASRVDIGV\*

>SPBDM4\_v1\_30045|ID:27157280|purD| Phosphoribosylamine--glycine ligase/phosphoribosylformylglycinamide  
cyclo-ligase [Uncultured spirochete bdmA 4]

MTVLLVGSGAREHALAMAIGASSE CERLVIVPGNAGMAE VGDIAEVALDDIDGLCALAER  
ISADLVVIGPEAPLAAGLADRLRGREMLCFGPSAAAARI ESSKAFSKSFMQRHGIP TAAG  
RSFTDAGS AKKWAREFGRPVVVKASALAAGKGVIVPESAHQTEEA IETLLVPGGEIVLEE  
RLEGEELSLIALCDGKNYAVLPSARDHKRLLEGDRGPNTGGMGAYAPACSMEEAEALARL  
VIAPALGGLAE EGSFV GALYAGLMLTEGGPRVLEYNARFGDPETQAILPLFASDLLTTL  
AACARGDIGQALPRFYRQSVACVVLASEGYPVHPKTGRAIRIGALPEKAFCLHAGTRLES  
GQIVSAGGRVLSVVGMGATRAEALGTAYAAV ANIHFEGMQYRRDIGARAARVAEFVRTSV  
AAVSAPAGAGAPGTAAPQLAPSAYARAGVDIDAGNKAVELMKKAVRSTY GSEVIAGIGAF  
GGQYDASSFKNLGSPVLVASTDGVGTKTSLALKFGR LKGLQDMVNHSIDDILVQGARPL  
FFMDYIAADTLDPEKVAEIVDGM AEACRDANCALLGGETAEMP GTYRHGEMDIAGTIVGL  
ADRQSLPRPDIAEGDILIGLPSGLHTNGYSLARAITAEMDLERVQPELGEALADALLR  
PHRSYLPILRNALDATPGPVKALAHITGGGLIENISRVLP PNL DARIHAESWKWPPLFSL  
LQRWGNISTEEMRRVFN LGIGMVAIVSAGERARFLSMLAEPASVIGELVPGCGKVRV\*

>SPBDM4\_v1\_30046|ID:27157281|purF| Amidophosphoribosyltransferase [Uncultured spirochete bdmA 4]

MTGKLHEACGVVGVVAEEAARLAFFGLFALQHRGQESAGIATLDTGSIHLHKDVGLVSQV  
FRGENFSTLAGNIAIGHTRYSTTGKSSARNAQPFLIDTQFGPLALGHNGNIANAPALRKQ  
LLGRGLGLMTGSDSELLAMMLAGTPGKTWTERIAQAMKFWIGAYSLVLLTREGVFAVRDP  
WGYPRLAWGRIDSGGWAVASETSALRVMGCSDFE EIPP GTILHFNERDPVECTRVEIDAP  
HAACSF EYVYFSRPDSVWNGKNIHAVRRRLGELLAE EAPASADLVIPVPDSSIAAAIGYA  
QRSGIPFGEGLVKNRYIGRTFIEPTKALRRQGV ALKFSPLKETLEGARIVLVDDSIVRGT  
TTAPIVALCRNAGAREVHLRIASPRILHPCYMGVDMGTEHDLIAV GREPEEIAKMVGADS  
LAYLSIEGFSRAIGIDGVCRAFDGNYHIPVDENFTKNC FEGFGKGTV\*

>SPBDM4\_v1\_30047|ID:27157282|purE| N5-carboxyaminoimidazole ribonucleotide mutase [Uncultured spirochete  
bdmA 4]

MSRGRVVIFAGSPADKTHVEAIARALG EFGIPSTVRIASAHKTPKRLLEIIEGYDAEPIR  
TVYVTVAGRSNALSGLVDAATQFPVVVCP PPSSESWAAYDIWSSLRMPSGVAPAVVLDPAN

AALFAAKLLALGEPDLRERIRQFQERNANRLVEEDEKIAGAARQAENSVTRELRT\*

>SPBDM4\_v1\_30048|ID:27157283| protein of unknown function [Uncultured spirochete bdmA 4]

VPASYPAGPRVLKALEKARARGAGL\*

>SPBDM4\_v1\_30049|ID:27157284| Phosphoribosylaminoimidazole-succinocarboxamide synthase (fragment)

[Uncultured spirochete bdmA 4]

MRFIVTTDRLSAFDRVLSAVPFKGQVLNELSAFWFRATADIVAHHLVSVPDPNCAIVKEA  
SPLPIEVIVRGYITGVSTALWRRYELGERTIYGQHFPEGMRKNERLPHPIMTPTTKGGP  
TGHDERLEPREVVEKGYLGAAIWNRVQDAAFALFARGTERAAQAGLILVDTKYEFGLAAD  
GSLLLIDEVHTPDSSRFWLASSYGERFEAGLEPESRDKEFVRLFYAEKGYRGDGEPPELS  
DSVWA\*

>SPBDM4\_v1\_30050|ID:27157285|purQ| Phosphoribosylformylglycinamide synthase 1 [Uncultured spirochete bdmA 4]

MKALILKAPGTNRDFDVRGALERAGGAAEILPLSELRSAPGSMRGYGMMLVIPGGFSYGDA  
LGAGKLFALDLSQFFADEVRHFVETGKPVLGICNGFQALVKAGILPGKKFEAHKFTLARN  
AGGNFECRWVRLVAPHRSIWTQGIESVFCPVAHGEGRFAADFS DAGALLQTEGCIALQY  
ADAQGAPAQGNYPENPNNGSIADIAGICNPEGNVLGLMPHPENAVFEWQYASLPGRSGDGA  
LRLFENGLRYAAS\*

>SPBDM4\_v1\_30051|ID:27157286|purL| Phosphoribosylformylglycinamide synthase 2 [Uncultured spirochete bdmA 4]

MAGRNIYRFEVWNRGAGGPRIDALRADVRALGIGILRSARKIALYFVEGELAPEELSL  
GRFLFSDPVEEVFEWREVGRRGQPDAALHEGGLAVDREAASERIVEICRKPVTDP  
VAIEVVRAAHELGISIKRAATGVRWELEADWLDDAALS KLTRVLLANAVIERWEFGEIE  
PIFPEGREQGLAVEHYDLAAMNDGELLGLSAKRRLALDLEEMRAIQAWFGARGRPATDVE  
LEMLAQTWSEHCVHKTFKADVEVRNSKGRPYPPVVHGIFNIYIRKTTEEIGAPWVRS  
AFV DNAGIVSFDGDWDISFKVETHNHPSAVEPFGGANTGVGGVIRDVMGVSARPIAATDFL  
CF GPPDMPEDQLPQGLHPRLIARGVVAGVEDYGNKMGIPTVNGAVHFHPGYAANPLVYCGC  
VGLAPAGVHRNAPRAGDRVIVLGGRTGRDGIRGATFSSMKMDGSTGDVAGASVQIGDPIV  
QKRALDVLLAARDAGLYDAVTDGAGGLSSAVGEMASALGAEIELSRIGTKYPGLSPWEL  
WLSEAQERMVLA VPPRHLEAFAALCSRFESEFWDIGAFRSDGELVLRMNGEIVLGLSMEF  
VHKGLPRKHLVAERSAGGTHGGHGNPDSVKYSGDVALPADA KARFLSLLSDMNIA  
SREQV VRRYDHEVQGGTAVKPFAGPYGDAPSDAAVLKPQGTDTGTWGI  
ALSNALRPDYGELDPYRG AWA  
AVDEAIRNAVAVGADPERIAILDNFCMGP  
GDSAVMWALVESARGLREAA  
LAFGTPI ISGKDSFYNEYL  
GPDGRRHAVPPSLLVSALGFVPDVKRALTSFLK  
KPGDSLWLVGDFRPV HRQESK  
VPEVSLRACEVYKAFFEAVQEA  
EVVA AHDLSDGGLAVALAEMCVGGRLGARVAL  
PDSAMVDASVPVLT  
LFGETT  
GCLLVEVGAGHEGSFSARFGPGLALRLGEV  
KAGPAMEIHG GGGNAGCGAGG  
PLLSV  
SIDEMLC  
AWKGD  
AWKGD  
AWK  
GKAREVLP\*

>SPBDM4\_v1\_30052|ID:27157287| putative arsenical pump membrane protein [Uncultured spirochete bdmA 4]

LNTFVLVVLVLMYVGII LFPARKAWISMGAAAVL VAGGAVTPGH  
ALGSLVNWNL  
CIIYLG SLVLAELFIYSR  
VPAFIAERIVERSPSIGVAIT  
IILLTGLVSAFVENVATV  
LVVAPVMI ELAKRGKKNL  
APLMIGLAVMANLQGTATL  
VGDP  
PSMIFANYAGYSFNDFFFKFGKPSIFF  
AIQVGAVVGAVYFFFYFRSMQSDVHTLPPERIVSWAPSLFLLAMIGGLALFSALSKEGGI  
HPASGIFVLGLAVLGLLWLAFIKKEPGRARDLVRHIDWGTLAFLAGIFIVGTLS  
ESGAL EVLAGKLA  
VLVGDDLFFGFALIVSISVLISGFVDNVPYIAAML  
PVASGLAKTMQV  
APELM LFGLLVGSCLGGN  
LTPFGASANIVAVSLSEKQGTNVNFWYWL  
KIAGPFTILT  
TIAASGFF WIIWR\*

>SPBDM4\_v1\_30053|ID:27157288| putative Branched-chain-amino-acid aminotransferase [Uncultured spirochete bdmA 4]

MSRFKTMVLSGTLTPTPLSAIKWDSIGFGGIVTPFVGGSVALS  
SDGVFEPMAVVPNGNIAI PPLACSLNYGQELFEGMKAQR  
GPDGNIRLFRVDANARRMAKGAARFMLAPPSEELYREAV  
IATVKANADYVPPYKGS  
LYVRPILAGVGM  
TLSPAPSDTTLFLVTCLPVGLHYKGRAMVN  
IKVETEFQRAAAKGTGWVKAAGNYAPCFLPSNEAKHEGYDDLLFLNQTGNNVEEVGTANF  
AIVKNGVLYAADSPSILPGITRDSVMRIAREILHMEVVFASLELDRVLGLGAYAKEGPAD  
EAFFTGTAAVISPISNIYHAGKDYHFGDQQGPFATKLRDQLVGIQTGRLPDPFGWVTVVD

\*

>SPBDM4\_v1\_30054|ID:27157289| putative Diguanylate cyclase [Uncultured spirochete bdmA 4]  
LKL AHLTKIKTFESSKRFLIKKPNEGDLIILQNQWNQLKILLHEYDAKKGPSVEFNNLSE  
EIWVQANIVVTGIENSFHSYIKYYTVIAIVLFSSII MLALISFAIKYFIQQRVEVQASHD  
YLTGLFNRYFDILLKRQLHESNRNNQNVAIMLCDIDHFKNVNDTYGHDNGDKVLKAI AE  
TFM MTSRASDTIIRFGGEEFLIASYQNIDDL MRYAERIRMNI ENTKILDLNITISIGIA  
ICDHSGEVNVKVIKKADTALYTAKENGRNQVILYDNIKK\*

>SPBDM4\_v1\_30055|ID:27157290| protein of unknown function [Uncultured spirochete bdmA 4]  
MIIIGMVGVLGLTLALS LYITRFIGQYSVLINDSGKVRGGIQR TVKLALMGEDYASVSDE  
IDGYLRFFQKSDEF\*

>SPBDM4\_v1\_30056|ID:27157291| membrane protein of unknown function [Uncultured spirochete bdmA 4]  
MSNLISFRHTFTHLREHARPILVLLILLAAILLTRLPSYLLFHILAELTSIVIGVCVFTI  
AWNSTSLLESGLLVLGIGSLYVSGIDVLHALAFKGMGI\*

>SPBDM4\_v1\_30057|ID:27157292| protein of unknown function [Uncultured spirochete bdmA 4]  
MLASIFVWNIFPSAYIEGEG LTPFKVGSEY AIIAVLLAAMALFWRGRTALALS VFYGVG  
SLAASIAAEL AFTLYFGVTD TANLLGHLFKITAFYLLYRALVEVAFTRPYDLLLRQLKQS  
EQTERAGRNF AEVELHACEESYLR LMNNA LVGVYQTS LDGIMLFANSEFAHLLSFSSAE E  
MIGGNVAERYRDLQDRARLVEILKREQYVREFETDLWTRNGQSRHVLMSASLKDRTISGM  
VLDITERKRAEEKIKIQVEQLAALRAIDIAISSAELYTLTKIVLEQVIQHLHVDAASVL  
LLNPHQY TLEYAEGIGFRKEIPALPPLRLGEGFAGRAALERRIVSAVNIAESEIEFRQKQ  
LIEGEDFVSVYTVPLI IKGQVRGVLDFNRSELHPDQAWLDFLET LAKQTAIAIENATLS  
EGLQKSNMDLIRQADRRRVGGNAQAYTICV\*

>SPBDM4\_v1\_30058|ID:27157293| Cyclic di-GMP phosphodiesterase response regulator RpfG (fragment)  
[Uncultured spirochete bdmA 4]  
MRKH TQYAYEMLAPIAYLKPALDIPYCHHEKWDGTGYPRGLKGEQIPLAARLFAVVDVWD  
ALRSDRPYRKGWSDDKVYEYIKSLAGTHFDPRAVELFFKVLSENNQGAG\*

>SPBDM4\_v1\_30059|ID:27157294| protein of unknown function [Uncultured spirochete bdmA 4]  
VFSNLLMSSAAMDQLVHHA VKFVIEGKSYRVESFSAR\*

>SPBDM4\_v1\_30060|ID:27157295| protein of unknown function [Uncultured spirochete bdmA 4]  
MFATLNPEAPDLIPDTIAYQKRIHKNAISMSVGLTNISPC\*

>SPBDM4\_v1\_30061|ID:27157296| transposase [Uncultured spirochete bdmA 4]  
MQDRELYE KLLGLKAPWIVTDVNLQVAESKVTVA VGHAPMTEFACPECGVLCKVHDHRRR  
QWRHL DSCSFVTMIDADVPRVKCP THGVKQVMVPWAEPGSGFTALFEAM AISWLRAASID  
AVAKRMGISWEEAWGIMERA VQRGLARREAAPIEEL AIDETS YQKRHE YVTVIVDRKTGC  
VIDVLD DRKKNLKTWLECNKDRLSAVRTISM DMWEPFITAVQETIDAAGSKICFDRFHV  
ASHFGKALDKVRAAEHKALGSVSPLTRTKHDWLRTKANGGYHDKRAFLELTRMHLKTARA  
WMIKETATGLWSYSYRGVAERNWRSLLSWISRCRLEPVIKVGQMVRKYLWGIINAILLKA  
TNAIAESINATI QKV KARACGFRNRSRFRIAILFHKGGLSLLPSGL\*

>SPBDM4\_v1\_30062|ID:27157297| transposase [Uncultured spirochete bdmA 4]  
MKSISDILGGLQILLEV SFDIQAGFEEYLTKDQRTFLAILRVIEEHLRVPYEAESRYGRP  
AYSINPFIRAFWAKSYFRLLTMDDL RKRLSDPNLRMICGFTKVPSLATFSRRMSLLSES  
SLMEKSFETMVSEYYAGSIVGDVARDSTAIAAREKPCNKKSDVALPKPKKYRRGRPRKGE  
ERPRKAPPVVAQH TTMSLEEALHTLDTRCSWGCKKNSQGNVSYWKGYKVHLDVTDAGIPI  
SVVVTGARVHDSQVAIPLERMTEARVTHLYSLMDAA YDSDTIR SFIQERGRVPLIDHNKR  
KADTRPPFD PASQRRY AIRTTVERTNSHLKDWFLSSPYFVKGIKKVSFQIMCGVLCLTAL  
KILQYFIAPAMR\*

>SPBDM4\_v1\_30063|ID:27157298| protein of unknown function [Uncultured spirochete bdmA 4]  
MNDFEYILSNTIRKDLAKYIVNSILPVPEKLF RYTGLKEYVLSDLTNNQLKPVDP SYFND  
TYDSSLIIDNVNGRPDDYTFIRRIYENANDMGNYRKIVEKRKKLDFAIKDHFKNHFRIMC  
FSEICNDIKMWGLYADYNGKICIEALSKVMR\*

>SPBDM4\_v1\_30064|ID:27157299| mRNA interferase [Uncultured spirochete bdmA 4]  
MGMVINQYEVYLVLDLPTQGHEIQKTRPCVVLSPDEMNHNI STIIVAPMTTKSHYPTRI  
EVNFNNTD GWIVLDQIRTIDKTRLVKKMGKIDRKIIHNVKKVIKEMLVD\*

>SPBDM4\_v1\_30065|ID:27157300| SpoVT/AbrB domain-containing protein [Uncultured spirochete bdmA 4]  
MLISVVPIGNSKGIRLPKAILDQLHVS DTLELEVEDHQIILKPVAKKPRHHWNEAFIKMH

QDQDQDTMLLPETNVTEAFEWEW\*

>SPBDM4\_v1\_30066|ID:27157301| protein of unknown function [Uncultured spirochete bdmA 4]  
MRSNPPFTCIENKDNEESITEFDEYTFILKLEDYERAQLDPESKFFKLGTTETVEMMRLA  
GPKKQ\*

>SPBDM4\_v1\_30067|ID:27157302| transposase [Uncultured spirochete bdmA 4]  
MGNAKRTYTEEFKRNALEMLKKPGKTGADVARDLIGSGEINRWRAVEQEHRGEEKAFP  
GKGQPRDEELARLQRENRLKEANEILKKAVAIFSRGEK\*

>SPBDM4\_v1\_30068|ID:27157303| transposase [Uncultured spirochete bdmA 4]  
MPWRMESMQLQKKFITLWETGRFTKTYLCEEFGISRPTGDAIKRYQEVGWDAL EEQPR  
GHKSHPTTTKTIEDAINNERKAHSNWGGRKIRVLLLRTYEEAEVPSSETTVNNILKKHGL  
TVPRKPPRRKLLKSEPKFDPQLPNQIMSADFKGKFRMGNGQYCNPLTIADSCSRFLFAIV  
GLERPDTESKPIFERVFREYGLPYQLHTDNGPPFGNAASLRRMTMLSVWIMELGITPVY  
SDPASPPQNGRHERMHRDLKAEATRPPGSSMVAQQRKFNHFREEYNTIRPHEALGMKTPA  
EVHTWSSREYPRRIRDWDYEKIDITPKMVTVNGAIRWKDKGFAMISTALGGKYVGLHPVDD  
GLWLVYYRHVALGYFCEQTMKVYELNDFDF\*

>SPBDM4\_v1\_30069|ID:27157304| exported protein of unknown function [Uncultured spirochete bdmA 4]  
MKKIFACVLIVLLVVSVPAPARPKQREVANLGVDTIIGASISRIKPIGGTLGIIFGVANV  
VTYAITGKTIGGYAIDGFERSSSEIYSKDNPSRGWMSLGMQ\*

>SPBDM4\_v1\_30070|ID:27157305| protein of unknown function [Uncultured spirochete bdmA 4]  
MKSIIISHNKLFTICLHNILDYLTSSNNKNSISNVLIVIDATSIDSNILQKLLFKYSDS  
IYRILLIHDHVDLDEKIVNSRVAVVYNPRTGNSTKFGHLLQHVLDGGVMLSKEKLFEL  
RQTELIHTEIVFTKREEEINQLLHNGDSIKVISSSELHISQNTVKVYISRIYKKLGIHSRA  
EYYINYDX

>SPBDM4\_v1\_40001|ID:27157306| transposase (fragment) [Uncultured spirochete bdmA 4]  
MQDRELYEKLGLKAPWIVTDVNLQVAESKVTVAVGHAPMTEFACPECGVLCKVHDHRRR  
QWRHLDCSFVTMIDADVPRVKCPHTGVKQVMVPWAEPGSGFTALFEAMAI SWLRAASID  
AVAKRMGISWEEAWGIMERA VQRGLARREAAPIEELAI DETSYQKRHEYVTVIVDRKTGC  
VIDVLDDRKKNTLKTWLECNKDXX

>SPBDM4\_v1\_40002|ID:27157307| Metallophosphoesterase (fragment) [Uncultured spirochete bdmA 4]  
MLGDTVETGSRSLMWNLALSDEALIPDVPLRPLMGNHDAFFGGQYLFRKAFFPKNFSSD  
SGSPYYYSIDAGTAKIIVLDLPWGTEQFNRAQKEWLQKTLEKADPKLPIIVLSHSFFYAS  
GYNDPTSDAPWYDNFNIPAIAPLLERYGVLDVVS GHNH YEEYLEHNGVHYAVIGAMGGK  
SDPPPTYISPASKWMAVGTFGWLDVDITSSSELVLSYRNENGLKLLHEERIPYTG\*

>SPBDM4\_v1\_40003|ID:27157308| conserved protein of unknown function [Uncultured spirochete bdmA 4]  
MFDADKWSYTVRAGRARLALEKNGFDVAVAPAAADAAALVMEFIKPGATVGFSGSMTVRA  
LGIQEKA AAAAGATLLDHNAPGLS AEEKYGILRSELTCDFISSVNAVTLKGEMLNVDGNG  
NRVAALTFGPRKTIVVVGANKIVADEAEGWARIEAKASPMNNKRLEKDNPCVKTGQCMDC  
DSPGRICRVYQILRRKPSLSDFTVILVAESLGY\*

>SPBDM4\_v1\_40004|ID:27157309| hcp| Hydroxylamine reductase [Uncultured spirochete bdmA 4]  
MFCHQCQETMRNKGCDMARGVCGKTAEVANLQDLLLYVCKGIGFWSTKAHERGIYNEEAA  
FFVDRMLFATITNANFSADDFERWILEGLKIREEVRTQFEKVDGLVSGTIPEAATWNVAD  
IESLRSAAAAGKGGWAEIRDDIRALKSLVLYGLKGIAAYVEHAYVIGKKSEEIFLFMMR  
ALKDLGEEDLSADQLTALVLETGKYGVAAMALLDSANTGVYGNPRMTKVKTGVRNRP GIL  
ISGHDLVDLEDLLEQTRVEHVDVYTHGEMLP AHYY PFFAKYDNL YGNYGGSWWSQGADIE  
AFNGPVLFTSNCLVPPKDSYKNRVFTTG VVGF DGCVHIPDRKPGKRKDFSAIVALAKTCP  
PPRELENGEIVGGFAHEQVFALADKVVEAVKSGAIKRFVVMAGCDGRQPVRSYAHVAEG  
LPGDTVILTACAKYRYNKLPLGDINGIPRVL DAGQCND SYSLALIALKLKEIFGLEDVN  
ELPLSFDI AWYEQKAVL VLLSLLYLGFKNIRLGPTLPGFLSPNVAHV LVERFGIKGITTP  
DADVAAML RGA\*

>SPBDM4\_v1\_40005|ID:27157310| putative Transcriptional regulator, BadM/Rrf2 family [Uncultured spirochete bdmA 4]  
MERVLGITDGTAEHALALAAINGGSIAANVAAGRLGVSPTYLAKVLQAMASKGIIVST  
RGS GGGFSLKKPASELSCLEAIEALEGPLPSRYCLFEHAVCTKKTC AFRELCIDMEKQIR  
STLSTTTIEDLARSFQDKE\*

>SPBDM4\_v1\_40006|ID:27157311| protein of unknown function [Uncultured spirochete bdmA 4]  
MDAGAIAMSVFSNAIVAFSRSSGPGGQNVNKVNTKVTASIALEKIEGLSQAERIAVKARL  
SGRIRGDGVLQVRVQETRNQGRNREIALELIGTVISGFLWFCVKIRPFTPDYDCFPNPN  
TTNQNFTATPISEINPTCFCCQVLMKPVFSIFRIIPLPGRRISNDFEVLSCSA\*

>SPBDM4\_v1\_40007|ID:27157312| protein of unknown function [Uncultured spirochete bdmA 4]  
MLSEIGVAVKFWLVVFLFGLGKQS\*

>SPBDM4\_v1\_40008|ID:27157313| transposase [Uncultured spirochete bdmA 4]  
METYIPHREGIIQTIVSHSLTQYQAYASPSETILDRLEQFTACADWTKGVARIRCEDCGH  
SYFRPFCKVFHLCPSCDQKRTLLYAEYLAEDLLLDLPHRQFVFTIPKILRPYFKSDKRL  
FGEVSKLIFSLLSDFFLAAGQGLLCAVVSYSQSFGEFARFHPHWHVLVLEGGFTTHDRF  
VYLPIGADEGMLKVVWQAAILSLFLRKKLIDQARVNMLKDWKHSIFSIESETRLFSKADRE  
ALGQYVVRGATCAEKIHYDPASDTVTWTAAPKGGFKGRAETFRGFVFDQIVAHLPVRRV  
QLVRRYGVYAGKVRKQWQERPSIYRLAPESWQKGHPYQSQAQGGKPSEDIAAEVPAW  
KLRKKSARLLRKVYELNPFVCPKCGPMSVVAIIEDPKELGKIIWAQQQAREPHLTAC  
ARSPPELALATV\*

>SPBDM4\_v1\_40009|ID:27157314| conserved protein of unknown function [Uncultured spirochete bdmA 4]  
MARYLEGKRLYLRTFRKADVEELDELMDDWPTQVMTGSVYPNTEKELEEAIDRWQRTDSR  
IWFAVIDKETNKIIGETGFLRIFMPWRTTDDITIEIWDKKYWGKGYGKEIAGLMFEYGFNY  
LNIHRMAIGVVEKNEQAMKIGASDFCVAGVQNSREYANLRSCRIESFTRSCLG\*

>SPBDM4\_v1\_40010|ID:27157315| transposase [Uncultured spirochete bdmA 4]  
MQDRELYEKLGLKAPWIVTDVNLQVAESKVTVAVGHAPMTEFACPECGVLCVHDHRRR  
QWRHLDCSFSVTMIDADVPRVKCPHTGVKQVMVPAEPGSGFTALFEAMASWLRASID  
AVAKRMGISWEEAWGIMERAVQRGLARREAAPIEELAISETSQQKRHEYVTVIVDRKTGC  
VIDVLDDRKKNLTKTWLECNKDRLSAVRTISMMDWEPFITAVQETIDAAGSKICFDRFHV  
ASHFGKALDKVRAAEHKALGSVSPLTRTKHDWLRTKANGGYHDKRAFLELTRMHLKTARA  
WMIKETATGLWSYSYRGVAERNWRSLLSWISRCRLEPVKVGQMVVRKYLWGIINAILLKA  
TNAIAESINATIQQVKARACGFRNRSRFRILFHKGGLSLLPSGL\*

>SPBDM4\_v1\_40011|ID:27157316| protein of unknown function [Uncultured spirochete bdmA 4]  
LTFGDIYKSEFEKEGNLISIDGNIEEAKSISDSIKTSGGKRFKYTIRRDGQPR\*

>SPBDM4\_v1\_40012|ID:27157317| protein of unknown function [Uncultured spirochete bdmA 4]  
MIKQMSISETRKKITSLADELSYFQNELEIIGIDKRFNMDRQKPTTTEFRA\*

>SPBDM4\_v1\_40013|ID:27157318| conserved membrane protein of unknown function [Uncultured spirochete bdmA 4]  
MNULLTKFKETSISVVPILLIVLVLELTVAPIGTTLLVQFFLGGVLIIGLSVFLLGIDIG  
VLPVGQKVGATLVYKRNLGLMLAVGFVVGFFITVAEPDVRVLANQAATVDPSISKTLV  
MISLGVGLFVAVGFARTTLGIPYRYLLIVFYIGVFILASLTDPA YLGVGFDAGGATTGPM  
TVPFIMALGVGVA VRKKGKEAEDDSFGLVGLASIGPIAAVLIMGIINKGRSAPASAAAAE  
SVETQGIAASFIHLIPETLADVALALGPLALMVFMFQITLLHMPRHQMMRTIKGLIYTF  
GLVFFFVNGGFLPVGSTIGGIIGAMEHNAILPIGFVLGAVVLAEPAIWVLLNNQVEE  
VSGGYIKRVMVLSLIGVAVAVALAMLRVVTGMSIWWLLVPGYTLALALTFWSPPLFTA  
IAFDSGGVASGPMSSFTLSFTLGASAAAGGNPITDAFGVIAMIAMTPLIAIQILGLIFK  
YKEKKA AVPHSSEAAEETVE\*

>SPBDM4\_v1\_40014|ID:27157319| conserved protein of unknown function [Uncultured spirochete bdmA 4]  
MTVTKQTIYTHGQLLSIVERHTGERLVAATKRAGAHGGTIILGRGTAESSLLES LGIGD  
SEKDVLTLATDEQTGPIMAALRSSEMREKHIRGVAMLIDVTDILRHVRSDEADSVSSAE  
RRSPMKTQDDHVLITFIVNRGYADDAMLAARKAGAKGGTVLNARGTGSEEDVKFFGISLV  
PEKEILLILVEAAQSDAILQAVRKVPCLAEPGSGIAFCTAVEDFITLGTKANDQR\*

>SPBDM4\_v1\_40015|ID:27157320| protein of unknown function [Uncultured spirochete bdmA 4]  
LGKFIENETIGACIGGDEFILIVPLANRGKIADIAAGISGELAKYEDPAIPA EKRLSMAI  
GYGTAYSVKEDFFKAYEDA EKMMRYVKLLDKNSDSRSIMKTHPEIGYRIAMSWSNFEELA  
PYIPLAP\*

>SPBDM4\_v1\_40016|ID:27157321| conserved protein of unknown function [Uncultured spirochete bdmA 4]  
LLLISLSHHERWDGTGYPRGLRGKEIPLLARILAVADTYDAMTSARVYRKPIGKQEAMEE  
IRRNSSTQFDPAIVNIFLEYLEKNEP\*

>SPBDM4\_v1\_40017|ID:27157322| protein of unknown function [Uncultured spirochete bdmA 4]  
MSHSLNIPCTAQEFRCDDKKSPLNTYGDHLTKVSLFLLIILFPMTVFFFSNTLNRVNAFEN  
ERIIITARMAATLIDGAKLASLRGDESDLSRPEYVYVKADLVRLHQSDTLISSAFLMRRT  
EEGKYILLVDESEPSDAHYSPPGKEFARVTEEMASPFVDGTSLSRPTTDSNMWRTALS  
PVLDRGTGNVVAALGIEYSDDVWNILPLKRPSYTLIGFSILGGLIILAVLFGIQNIRIRS  
LNRTSQEERRRLRIFLDQLPGMAFRCLSDGRGTMITYVSPGCKALTGYSPEMLIDNRGISF  
GEIIVPEYRESLHALFDRTAATGKDVHAEFEIVTKDGKRKRWLVYGEIHHGDNNTAEAEIE  
GIILDISEKKRAEAENEYLSNHDAPTGLYNRHYFFETLLNLESEGSIPYPALSGTSTDSA  
LLTMRLATRRATGFWSK\*

>SPBDM4\_v1\_40018|ID:27157323| protein of unknown function [Uncultured spirochete bdmA 4]  
MEEGSVIAAHTGGDEFALILLSADEEKVQKTMDLSRDFQQCRDLNMPAINRLSMDFGQR  
TATSRDSDVFAFDNAQKMMRQAKLLNKASASHGILNAMLATLYAKSGETEEHSARLAYI  
STKIGVDTCPKKS\*

>SPBDM4\_v1\_40019|ID:27157324| Cyclic di-GMP phosphodiesterase response regulator RpfG (fragment)  
[Uncultured spirochete bdmA 4]  
MLHDIGKISIDDRILKKEESL TEDEWKIIKTHPQIGYRIAMASSEFREIASYIIVHHERW  
DGKGYPRGLKGEEIPLLARILTVADAYDAMTSKR VYKDAWKREAALEELKKN SGTQFDPK  
IIDIFLSLAEAEDFGCPDV\*

>SPBDM4\_v1\_40020|ID:27157325| transposase [Uncultured spirochete bdmA 4]  
MKSISDILGGLQILLEVSFDIQAGFEEYLT KDQRTFLAILRVIEEHLRVPYEAESRYGRP  
AYSINPFIRAFWAKSYFRLTMDDLRKRLSDPNLRMICGFTKVP SLATFSRRMSLLES  
SLMEKSFETMVSEYYAGSIVGDVARDSTAIAAREKPCNKKSDVALPKPKKYRRGRPRKGE  
ERPRKAPPVVAQH TTMSLEEALHTLDTRCSWGCKKNSQGNVSYWKGYKVHLDVTDAGIPI  
SVVVTGARVHDSQVAIPLERMTEARVTHLYSLMDAA YDSDTIRSFIERGRVPLIDHNKR  
KADTRPPFPDASQRRYAIRTTVERTNSHLKDWFLSSPYFVKGIKKVSFQIMCGVLCLTAL  
KILQYFIAPAMR\*

>SPBDM4\_v1\_40021|ID:27157326| YhcH/YjgK/YiaL family protein [Uncultured spirochete bdmA 4]  
MIVCSFKDLEKYQSVLNYLPEALRKVEELKKAGLIPGRYDYHGFFINVQRGTTKPLNEGR  
FETHMRYVDIQYEIEGSELMAYAPKDALRDDLPYDEKNDIAFFNADKKDTTIAAIQAGMC  
YIVFPEDGHMPCRHTDRPTNYTKLVIKLPVKK\*

>SPBDM4\_v1\_40022|ID:27157327| conserved protein of unknown function [Uncultured spirochete bdmA 4]  
MTNEELVENVKIEGIGVASNLLAERLRRLILSRELPPNFVFPNETTFCEQLGVGRSTLRE  
AYKVLEAEKYITRTRKRGTYVNDVDQTLSSVSFETT IKMSDFNDLLEFRTMIESELAGLAA  
QRADAENIEKMKEYLDMRHRDNLAVLTSDDVNFHLEIAKASRNKLLINTMELAYETFL  
QGTFNAFQIDTKANIDQALFYHEKVLSSIEHHPVMAKEYMRNHIQSIKNRGVK\*

>SPBDM4\_v1\_40023|ID:27157328|dhaK| PTS-dependent dihydroxyacetone kinase, dihydroxyacetone-binding subunit  
DhaK [Uncultured spirochete bdmA 4]  
MKKIINPEDFVDDMLAGVLSAHGDQLTNVENNNRNIVRANWKDKVALVSGGGSGHLPLF  
MGYVVGKGLLDGCAVGGVFQSPSVNQIYDITKKVDSGKGVVYIYGN YTGDTMNFEMSSEMA  
DIDGIKTAHVVGNDVVASAPKGEEQKRRGVAGIFFIYKTAGAAAEAGASFDEVVRIANKA  
KANIRTIGVALSPCIPEVGKPSFTIADDEMEIGMGIHGEPGVKKT KIQKANILVAHIMN  
TILTDMELEEGCEASVLVNLGATPKEELYIVWREIAQILAVKKVKVFHVYVGEFATSME  
MAGFSISVFKLDDELKMLLRAEARTPFFEQIAY\*

>SPBDM4\_v1\_40024|ID:27157329| Dak phosphatase [Uncultured spirochete bdmA 4]  
VKTINSEELVKMLVTIADSMTQQRKHLIELDSTIGDGLGITMERGFQAAAFAKNNADL  
PPGFLLVKSGMEIVKLAPSTMGTLMGSGFIQGGKVL DQKMELTASDLTIFFEGLNGVLL  
RGKASPGEKTIVDILIPVEQMAYQGD DIVEVLACA EKGAQQGLENEKGMVSQH GKAAV  
FREKTLDLIDPGSEAVAIMINACKRSVVKESL\*

>SPBDM4\_v1\_40025|ID:27157330| conserved membrane protein of unknown function [Uncultured spirochete bdmA  
4]  
MKKIDTLNPWKTELKALSRYPWIVAVLGSILFILLSVFAGKFSMESFITLATSATFLTI  
VATGQMLVITTEGGAIDLSVSTVITLSAFYTTGIANGSNGNLWLAIPAVLLTGVVIGLVN  
SFLILELKIPAIATLGMNYIISTLILLYNKNFRVFDVAPFLTSVVR YKIFDFIPLMIII  
TLVIIIIGYDFLLRKRTRFGKSL LAVGQNREAAALAGIQVKITQMIA YVMCSVLA AISGIFI

SARVGGAFYGLGDSYQMOSIASVVVGGTTLISGGKAVPIGTYFGALFLIMLTTAMQVAGLK  
FGMQNVITGLFIVAVLFLASKQSQQ\*

>SPBDM4\_v1\_40026|ID:27157331| conserved membrane protein of unknown function [Uncultured spirochete bdmA 4]

MDNNRCLLQLRDISKTYLMTQALKSVSLDINKGEILGLIGANGAGKSTLMRVISGVTGPD  
AGGEIVFGGTALERGY SARQANKAGIHVVYQELSLCTNLNVVENFYIDQHEAYKKDFHWR  
KRLARHAAEAITDVFPGSNIDVNTKIGNLSLSHRQMVEIARATSMAGLRLILDEPTSSL  
SAKETQQLIDYLKKEKDISIIFISHRLSEVVKLADQIMVMRNKEKIWEGQNKDIAEQY  
LVEKMTTESTASPDAQDKREAEAARTAINEEIFVKTKNLTMNKLGGIDVSLYGGELIGIAG  
LDGNGQGDFLKAIFYATKNNKQLQKAGKICYVAGDRKKEGIFPLSNIADNMTINEIGKFP  
YFKFLDLNYLTERVNTWFRNLQIKAMSEKQMITSLSGGNQKVLVARAFLSDADIILDD  
PTKGVVDVGTKKQMDLLFKEVAAQGKLVWYSTEDEFEYCSRILVFRYKIVRELKDGEI  
KKETIIASSFEGDSLQDKSLLNKEQKFKHRSPILVPIIALIAVFTVSGLYQKNVFTQFGI  
DLLLTGALPLVFAALAQMFIIGLSQIDLGVGALMGFINVICATIMYKNTSLGFLMLAGVV  
VLYGIIGVLIYIRQIPAVIVTLGMSYVWTGLAYTIQERPGGNSPELVNKLFNSSFLIPSS  
VLYIIIGIVVSVLIYRSKYGIVLRGFGNNA AVSNSGWSPAKAFAIGYMLCCVFSIFGGL  
AITASTGGCDANSTTSYTLTVASVVIGGSELVGGIVFSPGTVIGAIMLSIISALLGFMR  
LDASWVTAMQGLLIVILASRLLRKNKI\*

>SPBDM4\_v1\_40027|ID:27157332| conserved exported protein of unknown function [Uncultured spirochete bdmA 4]

MKKVLTAALIVLVLSTVCFADAKGVQKGYVIALSNSFYGNSWRKQMVDCFTKSAMQAKA  
AGRISDFIIVNGDGTQNTQISQLNSLILSDVDAICINAASPTALNGVIEKAIAKKGKIVIT  
FDSIVTQPDAYKMDDFDYGGQKTIKCYVDRFKGKANVLFVRGIRGSDPEIQLYNGAMSV  
LKANPGMKVVAEADGEADA AISQSAVSNILPSLNNIDVAITTGGEYGVVQAFEAAGRKVP  
VIIGSNRSEFIKWWIDEKAKNGYETVSISSSEPSIGSVVWLAIHILEGDKVPNSIKLNSI  
LVTNKTVDQYKDLLPGTVIAQDYDEQFVIDMLKNLNNR\*

>SPBDM4\_v1\_40028|ID:27157333| putative HpcH/HpaI aldolase [Uncultured spirochete bdmA 4]

MALLLKKKLKAGKSVLGTMLCMIDNPNIWLLKGIGFDFVVIDCEHGTYTVQAVSNIVTV  
ARAVGLGTIVRIPQDRPSIQKYADMGIDGIMLPMVETTKQIELANQFSRYKPLGSRGIS  
LGATVDWKGGVDVGETIRELNDDFIILAQIESRAGVENIDQIMSVPGVDGCFFGVYDMSI  
SYDKPGEIYDPIFRQNIKIVLDSAKRHNKILGHHFFGYQDLEWGMEEQGVKFITWHTD TSA  
LQKAYADDVKKIKSMPLFVR\*

>SPBDM4\_v1\_40029|ID:27157334| putative transaldolase [Uncultured spirochete bdmA 4]

MGDYFKRVMSETATRFWINNATNTEAKLAIEAGAIGCTQNPSYVWKMLDGDSESELAKAK  
LKEIISKSEPNSEALIKVQREL VANIAKHFYPMYEKSNGLGYVSIQGSPIQEDAESIIR  
FARYNCSAAPNIMAKIPVTEEGLKAIGVLVKEGIPINATECMAVKQVLDVSEIYAAASGH  
MKNPAPMYFSLITGIFDEYLHSYVEKNHVDVNPDFLWQAGICVARKVHAMVKNRCYTIGF  
ISGGARGLHHFTEMVGADATVTINWKG TADVLLKQDLPVVS RFHMQTPFEVEDALVEKLP  
DFRKA YFVNAIKPSEYEDFGPVVLF RSGFVSNWEKALEFVASLR\*

>SPBDM4\_v1\_40030|ID:27157335| putative Xylose isomerase domain-containing protein TIM barrel [Uncultured spirochete bdmA 4]

MSVKKSI VLTALLPAAETEQRIFEMGASTMKA YDLSVIEFYAPWDTAKRRGDFLKSHGLC  
GVYLAATYQKRNHSHLCSLGNKERKSAVEDAKYCIDAA SDAQVKSILFTSGRRPNDPAQY  
QSAYSVLVDSFSELM EYAPKTMDVVLEPGDRDVDAMQLVGPT ELAIRFANDIRKEYPNFF  
LTMDTSHIAQLGENALTALRKASCVCHHVHLANCILQRANPLYGDKHPLFSCMNGVYDDE  
ELHAVYDNLVVMFRQQRKDLTIAVEVISRNGGEFGWMDEVIKGSPWFFSKIIDEE\*

>SPBDM4\_v1\_40031|ID:27157336| D-isomer specific 2-hydroxyacid dehydrogenase NAD-binding protein [Uncultured spirochete bdmA 4]

MKRILINIPNFQVLNPDAYKYLQDHGYDIILNPMKESVATYEEIFPYIDTIDAVIVGNDI  
WDDRLFTHAKKLKVIKAFGVGVDAIDLAEAKKFGIKVVNAPGKNADAVAEFAVGLALDAI  
KNISHQQALLKNNHWSVDWLGQEIKGRTVGLYGFNGIASKAAVIFKSFGATVIACDAIPN  
YELAKKIGVELVSADELLTRSDILSIHVPNTKENYHLINRDSIAKMKDGVYFINTARGGL  
VDTDALCDALDSGKIRWAALDVYEKEPAEPCDRIVKNEHVTLTPHIAGQTHESWHAISMS  
IVNDIERVLNNEEPHAWVNRNC\*

>SPBDM4\_v1\_40032|ID:27157337| conserved protein of unknown function [Uncultured spirochete bdmA 4]

MLNKNYVSPKLSFPEGPVLMNDNGDFFLVEMGEDAGTISHIDGKTFTCTRVVKTGRPNGLA  
IDKDGTIWCAESKHPSLLKVTQDGK VEMVLEKCEGEDFRFPNDLAFGPDGMLYMTDSGIR  
FYDSETNGKLNPDYMTYPYRGKVYCINPKTLEIYKIDDYIKFTNGIALGPDDRLYVNETR  
TGNISYSGKVNGRYSNKDKKLFANVLHEGENLSPSRGPDGMKFAASGNLYCVVYGQWDVV  
VLDRNGKQIKYIPTEGQNPTNLVFGPQGSGLIYVTEVAEGHMEKHHVGEDGMVLYR\*

>SPBDM4\_v1\_40033|ID:27157338| Anaerobic ribonucleoside-triphosphate reductase activating protein [Uncultured spirochete bdmA 4]

VLIGGLQRCSLVDYPGHLCAVIFTQGCNFRCPYCHNPQLVDPARFEAPLDEEKVFNFLRS  
RIGRLRGVVVSGGEPLLNDDLPEFLDRIGQMGYLVKLDTNGSFPDRLSAIVSAGLVDFIA  
MDVKAPFGRYGELAGVPVDVGAIQESIRIIRNSGTEYLFRTTLAKPLLDEKDTRLIRSFL  
GPGAHYRVQPINPNAEWRPEARLG\*

>SPBDM4\_v1\_40034|ID:27157339| Oxygen-sensitive ribonucleoside-triphosphate reductase [Uncultured spirochete bdmA 4]

MFQSIKRNGSEVRFDAEKIGSAISKAGAATGEFDAPIAKRLALRALMMAQQAFGEKIPT  
VEAIQDIVEEVLLASPYRKTAAYILYRDQHARIREITARSNGELVDQYLNQRDWRVNE  
SNMTFSLQGLNNYISSEISSGYWLNQIYPSEIRDAHLDGDFHIHDLNVLSVYCVGWDLKA  
LLVEGFRGVTGKIESRPARHFRSALGQIVNFFYTLQGEAAGAQAFFSSFDLLAPFIRYDR  
LTYPEVKQALQEFLFNINVPTRVGFQTPFTNVTLDLVVPKTYADEAVIIGGEPQPATYRE  
FQPEMNLFNRAFLEVMEYEGDAAGR VFTFPIPTYNITPDFDWDNHELDMLWKVTARYGV  
FSNFVNSDMKPEDARSMCCRLRLDNRELKRGGGLFGSNPLTGSIGVVTINLPRIGYLAH  
DEDEFLRLLDARLLARESLEIKRKLRLERFTSNLYPYSKYLRDVEKHFGCFWKNHFST  
IGVIGMNEACRNLFGEIASAVGQKFALRVMDYLRHRLIEFQESTGNNYNLEASPAEGAS  
YRLAKLDKNKYPDICANTSNDLEGGEREFPYTNSTQLPVNYTDDIFEYLDLQDEIQGKY  
TGGTVVHVFSGERVEDYEAVKALVRTICSNYKLPYFTFTPTFSICPDHAYIPGEVAVCPK  
CGKPTEIYSRVGTGYLRPIAQWNKGKQAEFELRKTFSVKKEELCS\*

>SPBDM4\_v1\_40035|ID:27157340| protein of unknown function [Uncultured spirochete bdmA 4]

MANDTDHLSPSLAIAYCDYTYRGSNTDLLLLAASIRRYGGICGSAPVWVMCQDAGKIQA  
QVFEKAAALHVELLPYRDVQDLTDFPFAQKALAAEAERAEKASELLWFDRDSLVLND  
LAPLLPCAEEKVSRPVNVQNIQASAGPEDVHNEFWRRACVLGGVDYRSMGTTTSYIDR  
KVLRFYIAAGLVGIRPELGIFREWERLLRIFAGDRFMRAYCQEHVLYKIFMQAALSIAV  
AGKTKVAERQELPPSAMYPMNFWNSDSNAYKPAVLDEVISLRYDTVLDDDGWGNFPMSTG  
LRNWINDNIR\*

>SPBDM4\_v1\_40036|ID:27157341|ygiD [H] Extradiol ring-cleavage dioxygenase, class III enzyme, subunit B [Uncultured spirochete bdmA 4]

MAEIEKNDGAAQIVYFSGGGPLPILGDPGHRSMVRFMEALPAKLRKPDAILVISAHWEA  
HEVTLTGGESPLIYDYGFPEEAYDITYPAPGQPGLVELIAGLLQKSGIPSRVDKNRGF  
DHGMFIPLKLMYPDALIPTVQMSLLHSLDPSSHLKLGALRPLLEKNILVIGSGFSFHNL  
GAFSWRGEAATDTKNDAFQNWLDLCTGDLSSESREHSLEYWEEAPSARYCHPREEHLLP  
LHVCAGMANRPARVIFDDFILGKRAVAFQW\*

>SPBDM4\_v1\_40037|ID:27157342| conserved protein of unknown function [Uncultured spirochete bdmA 4]

MIVNVVFHVDEIEKWELALANVHNLGAGIEVERSQVEVVANGKGVEIFASPDEKSLHTMT  
ILADRGVRFACQNSLKSHNINEEEVPEFFVVVPIGVLELAEKQKGFAYIKP\*

>SPBDM4\_v1\_40038|ID:27157343|ywlF| putative sugar phosphate isomerase YwlF [Uncultured spirochete bdmA 4]

MKIVIANDHGAVALKFRLVKWLESQGHQVVNLGVDVEDRIDYDQAEALAVREYFKGGYDF  
GIVCCGTGIGVSAANRHKGIRCALIHDSFTARMAKEHNNANFVAFGGRVEYTEPVEQIL  
GVYMNAQFEGGRHATRVAKLDTIC\*

>SPBDM4\_v1\_40039|ID:27157344| Metallo-beta-lactamase family protein [Uncultured spirochete bdmA 4]

MHMSITIRSLGAAEEVTGSKHLLVDSQKILIDCGAFQKRAESDNKNRALLGDDVDPAS  
IDALVLTHAHYDHCGLVPYLVKKGFKGSIYATSATRDLANLIMTDSAHIQARDADYLSRQ  
AQKNEKFEWKPLFDEFDVIQAMDQFVTVGYHRPIFVGDGIQVEFFDAGHILGSARFV  
AKDKEGNTAVIGFSGDLGRKNKPIKDPECLKDIDILLESTYGDRLHESTDDAVSRLEK  
LVNRTAATRGLIIPAFAVERTQELIFYLHLLHDQGRIPEMPIWVDSMALNATSIFAIH  
PECYDKETYDLFTTHAKNPFGFSDLNFSRVEDSKALNQAQKGMIVISADGMCEFGRIQH  
HLMHGLGDPANTVLIVGYMANGTLGRRLKDGAKDVRIHGDWYQVRADIQEIDAFSAHADW



KEAVEWLGCVDKVRRLRKIYLVHGEALAMRGRHVLDAKDAEIVKAGEIYTIA\*

>SPBDM4\_v1\_40040|ID:27157345| putative Uncharacterized RNA methyltransferase TDE\_2619 [Uncultured spirochete bdmA 4]

MTDDLTLRVEKLSHGEGITFSEGKAVFIPYSIPGELVFCRIVEDHASFSRAELIGTKE  
PSPHRSEPLCPLFGVCGGCALQHIEYAYQTKLKQAAARETFQRIGGFDPGELDIVTGEPEY  
HYRNRTQIHACGDGGLGFTKAGSPEAIRIPKCPILITTLEHWLVAENRKAHPYRALSALI  
GERPRFSVFGQDERIYIEGRETYAAASVRGKNFQFPVAHFFQSNIIIVLEKLVERFVEPLK  
GVLALDLYSGAGLFSFLADNFDSIECVESDAASMEAARLNLSRARAKVGFSDILVERWI  
QTPHANRAFDCIVADPPRAGLSPELRAWLAGAQADALLYVSCDHASLARDLRDLTQKGWK  
TEDITLDFDFYPQTGRLEAVARLARAAR\*

>SPBDM4\_v1\_40041|ID:27157346|pyrBI| Protein PyrBI [Includes: Aspartate carbamoyltransferase ; Aspartate carbamoyltransferase regulatory region] [Uncultured spirochete bdmA 4]

MARNGPFKGRSISVVDLSLDEQRYLYRKARELKEAAISGGDVSEFRINDLDYQVYLIFM  
ENSTRTRESFRNAGKFLGARVNVFDAATSSFNKNESITDAIKMLFGYSGESCFILRTKLE  
GACTWLDQEFSDYSHITGKPKPSFINAGDGKHEHPTQEFLDEFSEFLQLRWNDGHIHIAM  
AGDLYHGRTVHISKADGLKVFNRNVEVDLIAPELLSMPPYYVEKMKANGFSVRVFESIEEYL  
AQAKVAPIWYFTRLQLERMGEAVLERTPYLRQAVTFKKDFLGQLPDGCHFYHPLPRDRNS  
PTIPFFLDELPLNGWDGQSINGYWTRITEIAMLSGRIGEDFEGEHAQKPEFVDDFVHEVE  
AREKHKPEYKVGIKPVEEGIVIDHIATGEPVGEIWDTIDAARKILKLDVRSSHGVYHSNR  
GPETFKGIISLPDIISFGKDLKLAIAIPGCTLNLRHAHVAKKYRLSMPPRIYGFDEI  
SCKNENCISYPANNEGVPPEFIRKGETTFVCKYCEREHKFRDIWDV\*

>SPBDM4\_v1\_40042|ID:27157347| putative TrmH family tRNA/rRNA methyltransferase [Uncultured spirochete bdmA 4]

VKHSVSSHAIETLRAAPGSGTLFVTEDERRRGPRIRQILEEAERQGLAVRAVPASKLAE  
MNPEHRGVVLA VESELQRTLSLEELCERVSQVDASLVFVLDHIEDPHNVGAILRSADAFG  
VDAVIIPGRRASPLTDAARSSAGAIWMPVIQVSNLRAAVDELKSAGYWVYAADMAGAP  
VGEHPMSKKALVVLGNEGRGASRILKEAADESISIPMHGHVDSLNVSVSAILMYEYRRA  
CRG\*

>SPBDM4\_v1\_40043|ID:27157348| Transport-associated protein [Uncultured spirochete bdmA 4]

MAVICISRELASYGEETAQELAKLNGYKIVDKHEIEAALSAIGIDIEKQERYDEKNPGFW  
ASLSQQRDEYLHFLTQVIYETALENNCII LGRGAHAILRGIPNLIGIRIGASKSVRVERV  
RKAQNIDSRHALQIIESSDHDRA GFHKYFFSVDWYNPSEYDMTLTTDRFDPIHAAAIDA  
FRKSFISDTQEMNATAKMQDLLLGAKIVTEITYNRKIPIHFLEAAVERGVVVLHGVANTH  
AAVDSAVAAANLIPGVKQVESAIQLVQEFTVVP\*

>SPBDM4\_v1\_40044|ID:27157349| conserved membrane protein of unknown function [Uncultured spirochete bdmA 4]

MEKLALLA AFGTAVFWSFSAIFFENASKKVGALAVNFWKVVFAFFFLAISGTIVRGVPPF  
YDAPLRTWIFLSLGSIVGFVISDFFLFNAYVMIGSRITVIFQSLTPVFTALFAYIFIAER  
MQPHRLIGMAVTVIGILIVL TRSRQNRKNNEGRLSVKGLGYAFLSALFQAGGMVLTKAG  
LGDYSPISGTQIRALVAIIGFGINALLIGQGTHVFFKVPKIREAFTSTLKGSVFGPFLGV  
VLSLFLSQNTQVGATSTLMALTPVVIIVPSVLILKQKIYLM EIVGAAI AVGGAALFFLL\*

>SPBDM4\_v1\_40045|ID:27157350|tdh| threonine 3-dehydrogenase, NAD(P)-binding [Uncultured spirochete bdmA 4]

MKALVKRKNPGLWMEDAPIRIGDNDLLIKVKKTAICGTDVHIWKWDTWAQRTIRLGQT  
VGHEFVGEIVDMGRSVQGYKVGERSAEGHIWCGVCRACRAGRHHLC PNTVIGIVNRDGC  
FAEYLSVPAQNAWHVHEAIPDEIAAIFDPFGNATHALSFD MVGEDVLITGAGPIGCMAG  
AIARHVGARNIVVTDVNPWRLELAKKLGATR VVNVAKEDLKEVQKELGMVGGFDIGMEMS  
GSPQALEQMIENMYNGRMALLGLLPDGAGIDWSRVIFKGLFIKGVYGREIFETWYKMQT  
MLLSGLDISPVITHRFSFDDFEKGF AAMLSGEAGK VILSLD\*

>SPBDM4\_v1\_40046|ID:27157351| putative Small ribosomal subunit Rsm22 family [Uncultured spirochete bdmA 4]

MGEHSLLYSFQISEDAASALQKLPACIDEVNPVPERRRETELRYNIRDLWRSLT MERAHRT  
IDYLNPAFFSA YLR YFMPWNLVRLVALLTELPLELSADATIIDMGSGPLTFPLALYCAK  
PEFRKAPLTFICADRTPRIMEAGRLILELLAAKHGGELPPWKIELRHARFGEPLHEKASL  
FCAVNVFNEFFWHHEGILSEDA SELYHRTAQYCAPQGKMLIVEPGEP RSGGLVSAMRAAA  
IIGNEILAPCPHAYACPMPIGIFKSGQEYLIGHRTLEPVRMPAPRAKY PWCHFSVPAGF

APRWLTSLSEEAGLSKEKLSFSFLVKKQSVQKKPSGGHLPIHDSHMQSATVAERAAGG  
LTCRIISDSIALPGGRTGKYACSSLYTLISADQNKTPESGVLLRFRLTHPRGMEPRGS  
QOEALFDRKTGAVLISY\*

>SPBDM4\_v1\_40047|ID:27157352| protein of unknown function [Uncultured spirochete bdmA 4]  
VRFRRNAELNPSAARRAFLCVSTGFGEIRMLAYYFHGILRAVAQGLARLVRDQDVGGSNP  
LSPIDKKAASFASPGGLFIPIDGH\*

>SPBDM4\_v1\_40048|ID:27157353| exported protein of unknown function [Uncultured spirochete bdmA 4]  
MKKYVALLSLLILTGVAVCAQQSINIKAIIVAPVGANITMDSYLNIALANDGTISYQNDQ  
QGVMTVKSSTWLFHIDFSSEHLGYVKQGAYQIPYYVQVTEIPSSYSGFILPSSIMDGYV  
QLTSTQSIWFLGRTPKAGIRFYVGIKIDATSGQFFESGTYTDTLTINFVAL\*

>SPBDM4\_v1\_40049|ID:27157354| conserved exported protein of unknown function [Uncultured spirochete bdmA 4]  
MKKFFVFLIIGLVAGSAAWGATIGITVNAATKLEASVDQSTWTIALDNSGTAIDLPTQGG  
LTVKASKSAYTVTFTSANSGLTNNNGSNTIPYKVKVDTSAWTTGVATNNLSSYTQLTASAV  
KTIVFQSRTPVVGKTFAGFNIAAYTDYYVDGAYTDTITIAIAQN\*

>SPBDM4\_v1\_40050|ID:27157355|lysA| Diaminopimelate decarboxylase [Uncultured spirochete bdmA 4]  
MESTSCPEGIEIENSNHDFDGLVALALDYGTPLYVMSETIVRRHCEALRESFLRRYPG  
TRAYYASKAFQTLDMRLRIKDEGLGVDVSSGELYAALKAGVVPDIIIFHGNKTDHELRL  
LAVEAGVGRIAVDNLEEIYRIEREAARTGKTQTLFRVTPGVDSHTHRFISTGSLDSKFG  
IPLEPVETTRYIEALACPHVDFAGLHFHVGSQLLENTSHLAALRVALGFAARLARDFGL  
TVRELNMGGGFGIRYLPEDRAPVLSEFVDPLMAAVREWSAREKLPLPACAIEPGRWIVGE  
AGLTLYQIIAVKEIPGVRTYVAVDGGMGDNIRPALYDAKYAAIVGRTRDQGASVGRGEA  
AGHGQAQNRSSVVESNVATASERPFRTVTIAGRYCESGDILVRDASLPEPRPGDILSLS  
TGAYCFAMASNYNRVPRPALVMVKNKARLSVRRETYEDLLSRDI\*

>SPBDM4\_v1\_40051|ID:27157356| Peptidase C26 [Uncultured spirochete bdmA 4]  
MTKPLIGITSFEDRSRQPAPYISLKDSYVRAIGAAGGIPVVLVPTNKEQAHLIPRLDGI  
IFSGGNDVAPWFFGEEPLPGLGSWDTWRDEWEIELCNRAWDAKLPMGLICRGCQLMNVAR  
GGTVIQDIERSDSKALLHNPAIPHDELCHHIVIEKGSSLFALFATEKLLVNSLHHQAIEE  
PAQDFKVTARSPDGIIEVLEAKDGRFALALQFHPEGLFVRYPAFLAPFKALVEAASKNSG  
\*

>SPBDM4\_v1\_40052|ID:27157357| exported protein of unknown function [Uncultured spirochete bdmA 4]  
MKLRYIALVIIFSLGVSFAAATNGTVAISGIVPESVILSVSSSHVNLNANRGSESMISVT  
TLTVWSSGHVIAVESKNGGYLLNSDDLQEKIHYLFTLGILTQSPEELKSPWTSEVQSPT  
SKVGLALPLAILLQTEGQMIGEGTYEDLLTINIKQF\*

>SPBDM4\_v1\_40053|ID:27157358| Peptidase M20 [Uncultured spirochete bdmA 4]  
MSDVLNTIFPEARALEHWLDIRRALHRIPEPGNEEHETSSAVRAKLDELHIPYTQIGTA  
VVGLEGERPGRVALRADMDALPIEPADRPYASLHHGYMHACGHDAHMTVALGVAKLL  
SAHRHGFAGSVKFLFQPAEETGGARPMIDAGCLENPHVDFVLGLHVAPELPVGHIEVKS  
GPFYGASDNLGIIKKGKSSHAAYPEKGIDAIVASASVIQALQTVVSRISALDSAVITIG  
KIQQGTRNNIADEVTLTGIRTLSSEVRHSICSKVIDVCTQTASAFGASCEVHIRPSYP  
VLVNEEKATELVRDVAVQLLGSNVHLRQKPTLGVEDFAYYLQERPGTFWHLGCRRQENR  
SPSPLHSPDFDIDEACLPVGVAVQAASALRYLQAEP\*

>SPBDM4\_v1\_40054|ID:27157359|dapF| Diaminopimelate epimerase 1 [Uncultured spirochete bdmA 4]  
MAIRCIPEGFHAHKYHALGNDYLVIDPEELQIFLSQDAISALCDRNRGIGSDGILYGPLA  
FFEEGARALPDDSPFTGSRNTFALRIFNPDGSEAEKSGNGLRIFSLYLYESGRVDETPFQ  
VRTKGGLEVCQILPGEGERFITVAMGEPQFLPGSTTSLLEGVEYRAVRVSMGNPHCVLM  
GPPPSPELAKRIGPLVEHHQDFPRTNVQFLEVLDRKNIRIEIWERGAGYTLASGSSSCA  
AAAAAKRLGLVDDTLTVHMPGGALEIDMQKENIKMTGPAVRAFDALFSPYTLSLAQKR\*

>SPBDM4\_v1\_40055|ID:27157360|alr| Alanine racemase [Uncultured spirochete bdmA 4]  
MDHRGTTAWINLSAIRSNYRRLAELARGSAVCPVIKADAYGHGALAIHAHALEREGAPYCA  
VALAKEALELRESGIQMPLLVFGVPDHSWSSIAIRLGCAQTIYTEEHVRIASAASKSVGK  
RAKAHIKIDTGMNRQGLPPTKVKAFAGLLADYPEIAVEGIYSHFADADSPDPAFTNLQME  
RFTAALAGFSQAGIVPKYRHANSAGLLFHPETRLDMVRPGILLYGLSPAPGLGLPPGFE  
PALTLTTSIAHIKEVPAGESISYGRFTFTKRRSRIGLLPIGYADGYPRALS NRATVLRG  
MRAPVVGRVCMMDMTMIDLTGIPGARAGDEVVFGGRELPISEIADLLSTIDYEVAACMISK

RVPRVHIDESPQED\*

>SPBDM4\_v1\_40056|ID:27157361| putative N-acetylglucosamine-6-phosphate deacetylase [Uncultured spirochete bdmA 4]

MTHNNSATYIIIEGADLIFPDAIMPHATLAVFEGRIAHILADHELSSPLDPAKLDPSFEG  
APVLHVSDAFVVPVSLVEMHVHGCGSWGFERVSGPEELGAARFLEERGVCVFPVPTILWEE  
RALSSLVAAIEASGLPRERLPGIYLEGPFVNPAPKRGGIQQGNIRPIDPSLAKKILDASQG  
LLKISTLAPELDGIESVYRIFQGAGVLSLGHSDAKLQSLKLPGHYPYSITHLFNAMSGID  
HREGGLANLAFSQSPDYVEVNGDGIHVNATSLKLSARAISKDSLILISDAVIGAGMPHGR  
FRYYEHDVVSTERGVRYADTDVLMGNSRLGMDIVRNFTAQAGVPLWRAVRAMSLVPRRAL  
GMAKDYGSIEIGKVADIFIWDKEMEIATRPEALLASGESFSRDSRSQFGAKL\*

>SPBDM4\_v1\_40057|ID:27157362| putative Cof-like hydrolase [Uncultured spirochete bdmA 4]

MLDPKTLNPSELRFIAMDMGTLDEGYRLSPHVTQTLNHLQKQGKLIATGRIYAAAY  
GFLKGAFEPDAFVCTNGADIYGPHGARIATHHIPRQALHALAATGRHHASHEVLFCCYVG  
EEWIYEHPSAMVDFYEKRSIGKGLQRNFDLAGEDILKFLAIGPHEKLLPIREEIANSVP  
GLLETVFSHETMLEIMASGVSKRQGLEECLRYFGGTLEEVVAFGDAENDLEMLKAVKAGV  
AMGNSHASIQEEVAFVTESVDEDGVAHFLELRFGL\*

>SPBDM4\_v1\_40058|ID:27157363| putative transcriptional regulator, Crp/Fnr family [Uncultured spirochete bdmA 4]

MIDVNALQKYSLFGGVTSEQMERIKPLLGSEHFEAGECPQIEGQPNDKIYFILSGEVDIF  
KREVVIARLKEGETFGEMELLDIMPSIATVQAATSLEVVTISNRALYDISKLDLKTFSMV  
VMNLARDLSRRLRRMDELACGEAKIT\*

>SPBDM4\_v1\_40059|ID:27157364| Amylosucrase (fragment) [Uncultured spirochete bdmA 4]

VVRLSCPSLLFKSEAIVHPDSIARYIDMHECQLSYNPLLMAELWEAAATKEVRLLAYSLK  
KRHHLPSCGVVWVNYLRCHDDIGWTFADEDAALGKGFDRHQFLNRFYLGEPFGSFAQGL  
KFQYNPATQDMRICGTAASLAGIERDLRRDPGKNREIALRRFLLLYGIVFSAGGLPLIYL  
GDELGMENDPDWDKDPAHAGDSRWVHRPVFREALFEERHDPATVTGVSFAQFKKMIRARA  
AHRIFAVQDIQMIESGHPSVLIFRKVSETETLVVVGNFSEHCAGVSMDEVHSLFEGITSQ  
DEIPEAFDLLSDRHFVPEMPPELLPCELVWLYMPNGGRAQ\*

>SPBDM4\_v1\_40060|ID:27157365| Amylosucrase (fragment) [Uncultured spirochete bdmA 4]

MLRGFDSFEHELIERLKARGTGRFSCWPEFERRLDAELGQLTGLLFELYGDRPDFAYWVE  
NLVYGAFEAFAKARPRWLKARDHALPPESGWYLAQDVVGAVCYVDRWAGNFRGIAERLPYL  
KELGIKYLHLMPPFFKSPDSENDGGYAVSSYRETNPALGSMALSALARLLAGEDISLVAD  
FVFNHTSDEHDWALAAKSGSAAHRDFYLTFPDFREPEEYSRTRLRDIFPESRRGSFTWNEE  
MKRWVWTTFHSYQWDLNVRNPAVFNAMAGEMLALANHGVAALRLDAVAFIWKEKGTPCEN  
LP\*

>SPBDM4\_v1\_40061|ID:27157366|yufQ| Uncharacterized ABC transporter permease protein YufQ [Uncultured spirochete bdmA 4]

MTFELFLQMFPIALMFSAPIILTALGGLFSERSGIVNIALEGIMMVGAFTGATVTVLLEN  
STPAAAAYGGLLAGVVFSSLHAVASINLKADQVISGTALNILAGGLTVYLCQIIFHQ  
QSTRSFSNGIQKFSVPGLSNIPVLGRMFFDQVYPTFYIAIAMVLITWVYKTPGLRMR  
SCGEHPQAAASMGINVARMYFGVLVSGALGGLGGAVMVLTADIQYTLVSIHGTGFISLA  
SLVFGKWNPFVGLGAGLFFGFSTALSFYAKDIPFLANLPGEFFYILPYLLTIIALLLAFAG  
KSVGPKASGEIYDSGKR\*

>SPBDM4\_v1\_40062|ID:27157367|yufP| Uncharacterized ABC transporter permease protein YufP [Uncultured spirochete bdmA 4]

MTARKEKIVLPLIAVLLGFVLGSLIVKLTGRSPLSMYAAIIGFSGIDILNGQPINTRYI  
GEFVIQAMPILTGLSFAFASRTGLFSIGAEGQLMIGSISATAVALLLEAPKGIHLPLVL  
LAGILGGALWGAIPGLLKARYNVHEVVVTIMMNYIALHFNNFVILHLFGSADRVTAPFP  
TTALLKSPFLESITRNSRLNWGFIPVILALLIFSFIINKTTFGYSLRAVGYNKEAARYAG  
MKVSRNIVASMAIAGAFAGLAGAVITVGTNFGRVIQSAEGYGFAGIAVALVGGNEATGI  
LLAGMLFGGLKAAQPLMQSQGIPREIAGIIQASIVLVFVAMKYGIKMVIDKFERKQAPSTE  
GDRV\*

>SPBDM4\_v1\_40063|ID:27157368|yufO| Uncharacterized ABC transporter ATP-binding protein YufO [Uncultured spirochete bdmA 4]

VSYIVEMFHITKDFPGIRANDDITLQIEERSIHALLGENGAGKSTLMSILFGLYQPDGGS

IRVRGKEVKISDPNVATSLGIGMVHQHFKLVHNFTVTENIILGMEPHKGPVIDIRTAEQK  
VEEISRLYGLAVDPRAKIEDISVSMQQRVEILKMLYRDAEILIFDEPTAVLTPQEIHELM  
QIMRRLVEEGKTILLITHKLKEIKEVADVCTVLRGKFGVGTVPVADTDEEKMAEMMVGRQ  
VSFHVEKMPAKPGDELLRIEQLNVKNLKGVLGVKNLSLTVRAGEVLGLCGIDGNGQTELV  
QAVTGLCKIESGKIYLDKDKDITHLSIKERTDRGLGHIPEDRQKHGLVLDFTMGENFIIHN  
YYEKPFFANFGILNKKAIFENAERLIQEFDVRSQGQAMTPARAMSGGNQQKAIVAREIDRS  
PDVFFVVVQPTRGLDVGAIEYIHKRIIEERDKNKAIFLVLELDEIMDVSDRIAVIYNGEI  
VGIVDAAATNENELGLMMSGALRKTRSTPHPAHEAVHA\*

>SPBDM4\_v1\_40064|ID:27157369|pstA| Phosphate transport system permease protein [Uncultured spirochete bdmA 4]

MENNVFAGQYRGRKRKDIFFRIAVMVPAGIVIALLLFLILAQVVVNGAKSLNFDFFFQQQK  
PFGEIGGGIVQAIVGTLMMLLATAIVIALPFSLLAALYLIEHKGSKRANGLLSVVNTLQGI  
PSIVIGVVIYSWVVVPMKTFSALSGGIALSIVMLPLMISMIKESLEMVPASYVEAALALG  
APRWRVIVEIVLPAAGSGILEATGLGIARAAGETAPLLFTAAGNPFLSLNFKGPISALPL  
VIYEYIKSPYDDWHQKAWGAALLLVVFLSLNLFITRKRK\*

>SPBDM4\_v1\_40065|ID:27157370|pstC| phosphate transporter subunit ; membrane component of ABC superfamily [Uncultured spirochete bdmA 4]

MNDRRFNALLGFAALVIVFIFAGFLFTLVVQSLPAVKQEGAAFLYGSEWNPVTTHFGALP  
FIIGTLM TSAIALVIAIPLSLSAGIVMGEYVNSSWIRSLNNTLINVLASIPSVVFLWGI  
EVVIPLIRKLAMLVGAPPYGAGILSASLVLAIMIIPYSSMTREALMNPAGLREGAFAL  
GLTKQEVVTGIALPFAKNSIFAGILLSLGRALGETMAVTMLIGNATRIPTSLFSLGNTLA  
SVIASQFNEAASDVHRSAMMGLALILLVITMLAGWFRSLMSKGMGAYGK\*

>SPBDM4\_v1\_40066|ID:27157371|pstS| phosphate transporter subunit ; periplasmic-binding component of ABC superfamily [Uncultured spirochete bdmA 4]

MEENAMKRNAVSRKLVLLALFVVGTLGVLGAQSLGSGASFPAPAYTKMFDEYYKATGVK  
VNYQSIGSSGGLKNIQDRVDFGGSDSFIKDAFDFSKYPAQVVHIPTVIGAVVVTYNLPGN  
PKLRLTGDVVADIYLGKITKWNKAVAELNPNVKNLNLAIMPVYRSDGSGTTFNFTAYLS  
AVSAEWKSKVGNANSVSWPAGQGAAQNAGVAGVVKQTQGSVGYVELAYANQNSMAVAAIK  
NSSGMWVDPSESISAAAAGAFPADTRILLVNTDAKEGYPISALTWIIVYREQNYGNRSR  
EQADQLAKLLWMIHDGQKYVTSLDYATLPAPALKA AEAIKSITYDGOPLVK\*

>SPBDM4\_v1\_40067|ID:27157372|tmpC| Membrane lipoprotein TmpC [Uncultured spirochete bdmA 4]

MKKALLVLVVAALIAAPVFAQFRVGLVTDVGGIDDKSFNQGTWEGIVRFAQDFKLAKGNY  
KYLQSSAEADYVNLSTFADEGLSLIAPGFLFEQAMTQVATNYPTRKFLIIDTVVNLPN  
VASAGFAEHEGSFLVGVAAGLKAKADGKNIVGFIGGMQFPLIEKFQAGFEQGVKAVYPDC  
KILVDYAGDFAAPDKGQALAQKQYNAGAYIIFHAAGGTGNGLIKEAKERSQKGDIRWAIG  
VDKDQYADGIYSGSKSAVLTSMMKRVDVAAYDVCKMTMDGKFPGGQSLVFTVKNKGVGIP  
DKNPNFSADILAKVKEYEAMIASGKLVVSEVPAK\*

>SPBDM4\_v1\_40068|ID:27157373|deoC| Deoxyribose-phosphate aldolase [Uncultured spirochete bdmA 4]

MNWTGKLIATIDHTLLKATATEDQIKALCSEARQHFKAVCVNPNYWVPVCARELAGSEV  
LIATVVGFPPLGANGTAVKAEARRAVAEGAREVDMVINIGRAKAGDWTSVREDIAAVVKA  
SKHAIVKTIETCYLTREEKVDACRAAVDAGAVFVQTSTGFGTGGATAEDVRFMKESIGD  
AAFVKASGGIKTYEDAVAMLEAGASRIGASAGIAIMRDAEASV\*

>SPBDM4\_v1\_40069|ID:27157374| conserved protein of unknown function [Uncultured spirochete bdmA 4]

MNSGEDGPQNGEISLPKQNSVLRSDRLTMDKAAMLRLKRMHLAPYIQLATCLIGKPRRS  
GNMFRHQLDMAILMDYGYIDSVLLKASLIHDLEADPETDPDSILSIDDEAIDVYKLV  
EVTRRPVENKAEFLTRIRDYGLRARVLKSADRISNMISLGYVTDDVFVRRYTDETEQFV  
FPIAERADERMLAELRELVATRREYLRNRIE\*

>SPBDM4\_v1\_40070|ID:27157375|valS| Valine--tRNA ligase [Uncultured spirochete bdmA 4]

MKSVELSKAYDPKSFQRIYEMWKSEGHFQPKVDRHKRPFTIVIPPPNVTGVLHLGHALD  
NSLQDIQIRYRRMRGIPTLWLPGTDHAGIATQNVVERKLRKEGRSRESLGREAFIEETWK  
VAREHRAFIDNQLARIGASVDWSRERFTLDEGLSRAVREVFVTLYERNLIYRGEYLVNWC  
PSCGTALSDDEVEHEDEPGALWHIYELVDGPCPEWPSGRIEIA TSRPETLLGDTAVAAH  
PNDPRYVAIIGKKVRLPLTDRVIPVIEDSYVDPEFGTGLVKITPAHDPNDFLVGQRHGLE  
RINILNPDATLSDAVPEKYRGMKVL DARVAVLADLETLLGLLKGEKTTHAVGHYRCHTV

IEPYLSKQWFVRMKPLADKALKAWQDGDVFFPKKWEHTYRHWLENIRDWCISRQLWWGH  
RIPVIFYCKDCGAMIVSREDPTVCTQCGSGNIYQDEDVLDTWFSWLWPFSTLGWPKDTAD  
LRYFYPTSALVTGYDIFFWVARMIMAGMEFTGQSPFREVCIHGLIRDKQGRKMSKSLGN  
GIDPLEIVEEYGADALKFTLAYNCAGGQDILLDRDSFKMGSKFANKVWNASRYILMNLEG  
RAFLSERELTYNDTRWILHRLNEAAKTVGQALESWRFNDAAQTAYSFWDDFCDWYIEA  
SKLSTKSDDDKEKDRATTVLLKVLDESLRLLHPFLPFVTEEIYGMLPNAKGRLISASYPE  
WTKERESPDIQTHFEALKEIVTLVRTLRSEFQISPEVSIPLDLAFDGDFAHAAFIRGHAA  
LISLLTGASSVSIGGASREGSVSLAGNGATIHVQVRGLLDIAKLVDHLSKEVEKEKYIA  
KLEFKLANDAFLSSAPPDIVEKEKDKLAVSTAKAAKLDLYIRELS\*

>SPBDM4\_v1\_40071|ID:27157376| Long-chain-fatty-acid--CoA ligase [Uncultured spirochete bdmA 4]  
MRETEPWKFLDAYRGRVFSKDWPTLPQLFDITAERFPDPCFTVYSPQRVSLTYREARTL  
IVNVA AHLGSVGIKPGTHVAVTGKNSPEWAIAFIAVLVTGAVVVPIDYQLSTQEITLIK  
AGDVMAAFIDEKFEIQQEFHDMPCFALTKKAGNYIYDMTPPQGFKFEQPPVKMQSTAA  
ILFTSGTTGVPKGVMLSHENFVSDCFFAQSNNILHEDVFYALLPIHHSYTMLAVFIESL  
SVGAELVFGKRMVVKQILSDLKAAKVTMFLGVPMLFNKLLAGIMKGVKEKGAFTYALIRT  
MMAISGFIKKAFGVNPGRSLFHSVLEKASLSSIRICISGGPLDPKVFRQYNELGIDFVQ  
GYGLTETSPILTLNPVEHYKETS VGKILPGVEIRIENPDEDGIGEIVVRGSMVMQGYKYM  
PEETAQVLSGDGWLSTGDLGKLDKENYLYLAGRIKNLIVTEGGKNVYPEEIE NEFQLYDE  
IDQILVRGYNPEGKSVAAEIEALIYPNQDWISQNRMLPNQIEARIQDIITEVNRQLRPYQ  
KISRTHILKEPLEMTTTKKLRQSAKI\*

>SPBDM4\_v1\_40072|ID:27157377| 3-ketoacyl-CoA thiolase [Uncultured spirochete bdmA 4]  
MAKVSII GAYNTQFGNFVKKNKETGEVTDLKSIYDLMLEAGRGAISDAGIDPKDIDGVVW  
GSCAPGIFANQEHLAAFAPEIAPDALRFKPTYRCEDACSSGSVAVYSALYALESGRAKVA  
LVLGVEKMNLDDTKGVTHALATCSYWPEEGAKGYTFPGLFAEYAKGYAAQYGFDRPMLAE  
MLATVSALNYRNGIDNPLAHFGKGGVADRLGLMTAEAILALPDEKNPMIAEPLRLHDCSL  
VTDGAAAIVLVRDDLAKSEKAVKVAGLAHVNERLPISVRPNMYELMAGKRAVQQAFAE  
AGITIADVDLAEVHDCFTINQLLSTEALGLSADGRAGYDYMEGRFTRDDGHCAINLSGGL  
KAKGHPVGATGVSMHALVYKQLVGQPIGAVPAKKQPTVGVTFNVGGSSVTNCVTVLRKE\*

>SPBDM4\_v1\_40073|ID:27157378| putative hydrolase or acyltransferase of alpha/beta superfamily [Uncultured spirochete bdmA 4]  
MASGFAAVIGVSIFVVTAGNGVPPVYVHGNTGSSVWFRPVM DVPGCRAVAIDMPNFGQSS  
PLDGDISIQR YAAYVAGFMDLKGIKEAVVVGHS LGGCVVQALALERPGLVKAMVLVDSGA  
PNGLVTPKDRHPVIELMRTNRAVLEQALKATVPTLKD DALFKTIVDDAQKMAPP AWIGNA  
EALSHFDITSRCAEYEGQVLVMRGTLDPIITDEMARATAGAYRHAKLVTLEGVGH SVTVE  
NPVLF LQIFRDFLAEQGICKK\*

>SPBDM4\_v1\_40074|ID:27157379| putative hydrolase [Uncultured spirochete bdmA 4]  
MAEMMVNGVRIVYELSGECDVGV LKAPIVLLNGIAMSISHWKPLIAALPAGTCCLSHDFR  
GQTL SGKPAGPYSLAMHAKDLVDLMDALHIERGHIVGTSY GSEVAMEFAMLYPERCASLV  
VIDGVSELDPVLEAAVVS WMEAARKDARLFYKTMLPWTYSSNYIAAHRDMLTAREDGMAA  
LPAEWFAAFVELCKAFLKINQTQRLKQISCPATV L VGEKDILKHRGFSEIARNIPGAVM  
HVIPDAGHAVVIERPALCAEEIWQAVSLR\*

>SPBDM4\_v1\_40075|ID:27157380| livF| leucine/isoleucine/valine transporter subunit ; ATP-binding component of ABC superfamily [Uncultured spirochete bdmA 4]  
MLTIQNLECGYGRMKVIDGVNFAVGAESVGLFGPNGAGKSTLIATVMGMKIPWKGSIELD  
GKRIEGAETHIARMGVALVPQERELFPGMSVEDNLVLGAA YIPHAKDDIPNQLEKVFAL  
FPILKERRTQYAGTMSGGQQRMLAIGRALMSKPGLLILDEPSLGLQPSIVAEVFEVLKGL  
KSSVSILVAEQNVRESLKAIDRGCVL ENGRIVLEDSAEGLRTNPFVIKSYLGL\*

>SPBDM4\_v1\_40076|ID:27157381| Branched-chain amino acid transport ATP-binding protein LivG [Uncultured spirochete bdmA 4]  
MSKCLKTENLRRFLGLVAVNNVSFSMEEGEILGIIGPNGAGKTTFINLISGIIMPSEGLI  
EYKQDITYIPAHERARMGIARTYQLIHPLENLT LIENVMVGSIFAKGNGLKEARRRAEA  
LCQELGLTGLDRDTSRLTILEIKKMEIARALANEPEVLF LDEVMAGLNADETKDIAMVQ  
KIAQERHLAVGVVEHVMGVIRELTHR VIVLEAGELIAEGKYEDVSKNPRVIEAYLGGGAA

\*

>SPBDM4\_v1\_40077|ID:27157382| Branched-chain amino acid transport system permease protein LivM [Uncultured spirochete bdmA 4]

MNRNVSRIFAALFGILAIALPLFAGDYPLQVARNIMLYMALAITWDMLLRSGQISFGIAG  
LFGVGYAAAILGVIRAGMPA WFSIIFAAIFSGVVAF AIGFLILRLRAMYFSIVTLALGEI  
FRIIHNHLDFTGGPEGVVMQQGVIFGGSAGKLYWLTLAGLAV AIAASYWFEKSKIHFAL  
TAIRNNEISAKSSGVNIFRWLLAFVVTSAIQGLLGIFVQSYGFATPDTVFSADFTLLP  
LAMALLGGVYSTRGPIFGAILLGLVSEWLKLPYGHLLVYGIHIIIIVILFMPQGLKQLV  
RQPANKTDRRSA\*

>SPBDM4\_v1\_40078|ID:27157383| High-affinity branched-chain amino acid transport system permease protein LivH [Uncultured spirochete bdmA 4]

MVVKRRRTAIIAAMSIAATIALILWKPTVLIYGLQAAGLYAAVAIPMGLVLGIVHIVNLSH  
GEFMMVAAAYAAYSACKALGMDPLLAIPTAIVTAIFGWVIFQLTIRRALKGPELNQLILT  
FGLAIAFTQTINLIFTSQTYKIPLDYVSASMDIGDITFGTWSFVFAVAIVYTYGLQFFL  
TKTTTGKAAALAVGQNPRGAAIVGIDVYRTYGLVFALAMALVGAMGALFLT KSAIFPGVGT  
PFTMKSFLIAMAGVGNIPGILGASVLLGVAENFLRAFRPTRDWAEIVFFVLIIVVIVGR  
SLKGRKS\*

>SPBDM4\_v1\_40079|ID:27157384| Leucine-, isoleucine-, valine-, threonine-, and alanine-binding protein [Uncultured spirochete bdmA 4]

MKRMMLALAVFALIAGSAYAQGTIKIGGIWTLADITGKQGSAAAQLAVDEINAAGGVLGK  
KLDLIVVDDEGKADKAAA AVEKLATVDKVDVFMGGMGSGAELGKIPAFKKYGVVMSTGA  
AGSVTVEKALGPSPEDFYFHHPWDYNQGASYAEGWDAIQKQYPNIKIRKIFLAYEEGA  
FGKSSWDATKILFGGDNR YIVDGASFKSALFGGGDYTSVLEAAKAFKPDLFLWAGYDADA  
LPLLEQSKAMKFSPIYLGAPPGWPIGFGSSKLSRNVMLYGMWSPAMNDNNPASAKFYKN  
YVAKYKEEPATYFAPLSYSAVYILADGIKAAAGTTETAPLIKALEATKYASPLGETITFKP  
SNIKHQGITRQKILQWQGGFQEVWPF EAATAEPVYPPPAWK\*

>SPBDM4\_v1\_40080|ID:27157385| Beta-ketoacyl-acyl-carrier-protein synthase III [Uncultured spirochete bdmA 4]

MHVGVAGIGLYIPKHYMTAADLAKATTVPEDVIALKFGIKRKPIAGPEETTSYMGMMMAAK  
AALDDADIKAEDIDLLIWCQAQHKDYPCWLAGLYVANQLGATRAWSFDMEAMCGSMMAAL  
DVAKSLMMVRDDLNTVLLVSGYRNNDLIDPSYPPTRFMMDIGSAGSACVLKKNLGRNVVL  
SSAFKGDGSLSEMCVVPVFGSKAWPPKPEDALHASFIVPDEQAFKQKLGEVTMPNFYAVI  
RESMRKSGFVEQGIDYLAILHFKRSAHLAALQELGLREDQSTYLENYGHLGQNDQLLSIK  
LGLETGKIREGSRIVMVGAGLGFVWACTV VQWGAWQESVKS\*

>SPBDM4\_v1\_40081|ID:27157386| putative Transcriptional regulator [Uncultured spirochete bdmA 4]

MNSDTRQALIDSAVTLFSTKWYGTVSVAEICRSAGLSNGAFYRHFKNKEEIFCAILDHVV  
QQIEKALKPLSSMELSQLPNFVSIYNFSQDYTPLVRVFREGQYRLF EYERKLKDVYEH  
AFQVVFGRTPSITEYLFALAGLRFASIRAALHQIPVQTDALVTILSKGLFKTQPINADRI  
FATSITPLPIELWPDSRDLLAEGRKLFGKEGYFETNIHDVTSNAGLAIGSFYRYFESKE  
SFYKEVIRSVGRDVRHFISLNLGNLNRVEREMRGLWLFILFLSMDRYCYNIVREAEFVL  
PNEVRDYDDAFHRGYLKREDASLTCDSTTCIEFMLGVAHYLGIEVIFDKSPEIARQTIEE  
MGQLYIHGLGEMQRPDESASVR\*

>SPBDM4\_v1\_40082|ID:27157387| 3-oxoacyl-[acyl-carrier-protein] synthase, KASIII [Uncultured spirochete bdmA 4]

MPKAVIIGTGLYAPGEPIDNVT LKKLTVGVEFNAERQEAKIGIKRRIARLSGLQESTADF  
AEKAARHALEAAGVDPKEVGLFIVATDTPEYISPATSIVLQGR LQGGETDAKSFVVGASC  
ASFVEALDAAARHIMTDSSLRYAVVVG VYNMPAYIRDGDAFGWSIFADGAGAVVLERQED  
SSSGYIDGAFVTDGTQWNFVGVYAGGTRLPVTRERLDAGEYGLQLLQRLPGDRNVKLWPP  
IVLRLLEKAGMSQSAVNHYLFTQINKSVIEQVMEVLGEPLEKTTMVMMDRYGYTGSGCIPM  
ALHEAIQAGRIKKGDLVVLV ASGAGLAVGASLLRI\*

>SPBDM4\_v1\_40083|ID:27157388|cat| 4-hydroxybutyrate coenzyme A transferase [Uncultured spirochete bdmA 4]

MNLQDEYKRKLISIPDAVSKIKSNENIVVAMCASEPQGCMDQFHTVADGVENVRVFSCLT  
LKA YDFYMIPEMKGHFELASWFHAPGSRAALKKHTGTVTYV PNMLHRSATDFIFARKPHI  
FFGTCTPPDKHGFVSLSLGITYEKDILENADLVILEVNPLLPRTFGDTHLHVSHVDYFVE  
YEQLVPELPSQPSETDLTIGRYIGELVEDGSTIQLGIGGIPNAAALALRDKKNLGVHTE  
MVVDSMMELYEMGVVTNTAKAFHKGKFVATFAMGSRKLYDWLDDNVAVEFMRGK WVNNS  
VVSQNSKMVS VNTCLMADLTGQVASESLGPVQYSGTGGQSDTAEGAVEGFDGKGKSIAC

YSTAKNGTVSTIVPMLTEGTA VTLHRSLVDYVVTEFGIASLRGKTVRERARELISVAQPN  
FRAELTEKAKTIGYL\*

>SPBDM4\_v1\_40084|ID:27157389| protein of unknown function [Uncultured spirochete bdmA 4]  
MTRKEYIDILAQRLEGLDEASLNDIVLEIEDHLDGLAREHPEKSAEQIIDELEPPESLAD  
SLRDAAGLPGYGERESGAPHHTDQTGQPEGQAEDSSSPSAKKTVRIVIDDEDLEEAIKA  
FDIAKIFKRNRDEKKEGSLKDVYNLSFGIKGTELSDLRHVSVRARSADIRVLFSNGELEV  
DTPEEEEPTLLMQHAGKDVLRATLVGSSEPDRINLRIPASVDELDISTASGDVHVVDVRV  
GSLSIVTASGDVVVETCEGDVEVKTASGDIKLAQCQENLKVSTASGDISIQADDMCNAIE  
ISSASGDIMLVYPDGWGASLSISTVSGEIEHDGLSVGRRRVRIGNGLVPVRISTVSGDVR  
IQKEE\*

>SPBDM4\_v1\_40085|ID:27157390| Transcriptional regulator, PadR-like family [Uncultured spirochete bdmA 4]  
MGAAEGLYEKWKSQFRKGFLELCVLELLSNSGRSYGLAIMERLNNAGVDVTEGTLYPLLM  
RMTKDESIEAQWETPEVGHPRKYVVISNIGRALLVRMREEYEKSAQAQRNLMMSGGQGL\*

>SPBDM4\_v1\_40086|ID:27157391| protein of unknown function [Uncultured spirochete bdmA 4]  
MEIIHMDARRVWRSVLDLAHARRDALTLSGRMAGKQGRAPRRNIDTSTSRDVYGRNAD  
MYAREEAIELYKRLSFDKRPL\*

>SPBDM4\_v1\_40087|ID:27157392| putative Hydrolase, TatD family [Uncultured spirochete bdmA 4]  
MYCDAHIHLVDLDGREPGFARKALQFSWRGAVVSHDPAEFLQSEALRAKMPPTIAGFGIH  
PQNPDMQNATFLSSLCDEKKIRFIGETGFDFFGDGPLRSRNPDAMRQQAEAFQARLAA  
RAQLPLVVHLRKATDVFMAYGRELDGVPSVIFHCWPGRLEEAKMILKKGINAYFSFGTPL  
LRDSKHAIESLLGLPASRILSETDAPWQPPHGSAWTRLEHIVDITDKMAHVLELDLKALA  
PLLEKNFTAAYLLDN\*

>SPBDM4\_v1\_40088|ID:27157393| putative tRNA threonylcarbamoyladenosine dehydratase [Uncultured spirochete  
bdmA 4]

MTNLQNPSEKSSGSFFDRTRIIVGESGLCALANAHVAVYGLGGVGAACALDLVRAGVGY  
LHVVDFTVETSNLNRLAFGFQRYVGOAKSDAFIDVAKEINPAIEIVGEKLFSSDTAAG  
IIARECSVHADCVDSLGPKASLIAALRQGDFIFISSMGTAGRLMPERLKLGPMA SVKGC  
LARA VRQKLSKMQIPLDFPAVWSDEPAVRPLPREGRRGIQGSAPFVPQTAGHFMAAWIVR  
RLEDAHV\*

>SPBDM4\_v1\_40089|ID:27157394| Aminotransferase class I and II [Uncultured spirochete bdmA 4]  
MHMFEPFGLERFFARHEFSARYLLCTSDCESMSIDELLALTGQSSEALDALQRTWLGYTE  
SKGSPLLREKIARFYRGLDPDSILVHSGAEAILNLYLATVRPGDTVIVNWPCYQSLIEI  
PKGLGAETLKWKVREHEGRWFFDPDELEQLICGAESSRGRQKVKMLVLNMPHNPTGALMT  
PGEFNRVVDICRAREILLVDEVYRMLELGATQRLPAVCEIYENAISSVLSKAWGLAGL  
RIGWLATRRKDILDKVAAVKDYN SICASAPSETLACIALDHSDKILARNKAICEANVVHF  
KHFFERHRELFTWIPARAGSVAFPALLSAGHQHWHDAASLADQLLQETGALILPGALYGO  
EFGLHFRIGLGRRAVPEGLSVFSRWLEARGEH\*

>SPBDM4\_v1\_40090|ID:27157395| protein of unknown function [Uncultured spirochete bdmA 4]  
LGRYAAEKVSRILYGSDFMVNLFK VRSYRD\*

>SPBDM4\_v1\_40091|ID:27157396| protein of unknown function [Uncultured spirochete bdmA 4]  
MMQADVEAFWANFEQEIGETILSKTMGQH FSSRKSQGEWGLLVLTGSAIRFRPTPGENWF  
QSLFRMAAPKVPQEPLSDIVLPLAFITAIELPKKRFFDFLFSPPFTVFTLRYRLGEEEEKS  
LLGADPKSEFFDKLLAELPVLNGT\*

>SPBDM4\_v1\_40092|ID:27157397| conserved protein of unknown function [Uncultured spirochete bdmA 4]  
MSDIYQQLEDTNILFFEYGITAYYDEKPRPIRFLVVQGSVIELARCFGELQYPALPY  
ADASFQEEARFLCTENALEDLGGPWMNFRKNPLNGIFYDKDNIYDELARTLPSRYAKS  
ERSLFDAAIFATLRETLMPESEELVIPASTSALFQKDLLISILSGPYPASGFELLKRSGF  
IAREWP ELALLDEV DHSKDFHPEGNGWNHTMQTFSYRKDRDLTSLALLLHDIGKPESQS  
REGRRFDQHAELGARRARKFLSRLGFPGIQEDVGFLIRYHMMPAALAVLPIQKTEALIT  
DARFPALLELFR CDEFSSFKDPERYYEACNAYQTIRRNMKNPYRNADGSKQRANKRPPSH  
Y\*

>SPBDM4\_v1\_40093|ID:27157398| putative metal dependent phosphohydrolase [Uncultured spirochete bdmA 4]  
MKRKL FVPIITLVTILVVGVAFYGVQRYVADRNFDTIDHALKSVIDLQASAVYNGYFAW  
TGLYDLIMEGKLAEANELAQDAKESFPLIDSLEIGQGIPPEENFVITLDGELLRIEYPIR

NDDETKTAPNTFAVTVIQAQNLLDIVSPHEFRIDTVHGRKTIYGIPVSPSPVFFSLWNIA  
FMALLTSLIVWFILQHYFRKSDFFLDTRGLESIIYLFEQTEKVSASHSRNV AIFALFVGK  
KLGFKGKRLKNLYVAALLHDIGKIGVSTSIVTKTGKLD SKEFAQMKQHPVISARILRSFK  
EFEHLSNIVLHHHEREDGSGYPDGLKGKEIPLESKIIA VVDVFEALVGERPYRNP IHPSS  
AFEKMKQMPLDQRIVNVLIEHYGELGTFKPPRWVLSYSPW MFAS\*

>SPBDM4\_v1\_40094|ID:27157399| protein of unknown function [Uncultured spirochete bdmA 4]  
MKTVVFVSAFLEDAIVVKTMLLESAGIPAELLS DQMLDINPFYSIEPKGAKVIVPDDAETDA  
EAIVANFKEHKKIEK\*

>SPBDM4\_v1\_40095|ID:27157400| Peptidase M24 [Uncultured spirochete bdmA 4]  
MQNRILAFSNLLQIDHYLGNSYNIRMF TREIYIKRKEAFIRALCERGITRGT FILLANSE  
SPRNYPSNCYPFRQDSSWLYFVGTGFPDFGYSLDIETGRTCLYADEPSLDDI IWTGELPS  
SKELAYKAGIDYSSPFSALHSLVADRLAKQEPLFILPSYRSEQADKL AELFSQGDSSRRD  
LLRQFVDPRVILALVGVREIKGPEEIAEIERAVAITKAIHEDLLHSLEPGWTEKAAADYV  
LSRASAQGCELSFATIATCRGAVLHNSPTGYAATAQDTFLLDAGVEMPSGYAGDLTTTFF  
VGPRLGTQARAIYEVLYQAFETTARALAPGVRFIDIHK TASLAIKGLISLGLMRGDPHE  
AVEAGAHALFFPHGLGHQIGLDVHDMEGLGEDYVGYGEELRRSDQFGLRSLRLAKTLKPG  
MVHVSVEPGIYFIPQLVQKWRAENICKDFLKYDII EKWMSVGGMRIEEDWCITESGARRLG  
PAFDKKA EALEKARSGI\*

>SPBDM4\_v1\_40096|ID:27157401| protein of unknown function [Uncultured spirochete bdmA 4]  
MDYVRYCLASNLRLRRSILQMSQEELAHLANLS PGFIANLETGRNFPSSKAILKISSALK  
IEPWKLF LDPQKQDMFFTRDEVFQWLEDSRERLLGLSPKQDEQNDESQSSDDASPDQ\*

>SPBDM4\_v1\_40097|ID:27157402| exported protein of unknown function [Uncultured spirochete bdmA 4]  
VSDCWGFLQNKTRTTNPSQATTLHPKIDNVCFAFY YERVKHKYACLLIITLLVSFAAMP  
PAFAEPEIKTLANGLTVFLNPIEGEENVAVVLA FHAGADAQTAPVAGLKFLEYALFNGP  
ATKPGISEPALAIDVLEPN SIEGGSSIDRFEFGFSSKKENLVPALDTLLY LFSQERREFI  
FAQTDGIEYARQATRALIQNELSDSDMLSNMAITKKLFAKEPYRLDTLGADYVIEKVDAS  
QLKSFASLWLV PNNACIAIAGGFDKEQVLALVDQRFGQLSKARNPWPAGLATFPKPGVSR  
PVFLVFPDSGIPTGQMEIEIRYRGPDPKDT HAYTSALMLQELANAPSSRFQTA VRKGMK  
DSDPENLRIVYTPTRNSSWLAIESMLSVPAGKRPADLVFTFKELVRSTEL YMIKANASYF  
PAAEYQKARES LLEKKMATQGDPLQSAARMVTLWSWGIPSFLFQESDAIMKSGQKDISQF  
VDTYVQKNLEVV MVRIDPNLYEANKKNFSSYGFETISNQNALWWR\*

>SPBDM4\_v1\_40098|ID:27157403| (P)ppGpp synthetase I, SpoT/RelA [Uncultured spirochete bdmA 4]  
MDEILQNFLSKAEHRFNAEKNFLSSAAEY TQSTHGDRKRASGEPAFYHDVRVAEILLEL  
GMDLESILAGLLHDTTVDRVSGFSPVNSAQESSNKPD SGGQPQSSTAQNPNKVPSPQ GK  
SGRTRKEKDAGALNSLLAAPDPHIEELYGKETALIVAGVNRLSSVRAKNKSVHAAETMRK  
MLFALTSDIRVILVKLADKLDSMRTLKYLPEERQKEIATECIDIYAPLADRLGISWLKDE  
LEDLSLKS LNREVF DQIKDIVNVRKDARQEFLKKVTERILSSAAKEEIEVEVSARAKHFY  
SIYQKMRKRGSPEELYDLLGIRIICKSIN ECYSLGLVHRLWKPIDGRFKDYIAMPKSN  
GYQSLHTTVLAYGGQLLEIQIRTREMH LVAEYGVASHWLKKGTTSELPQLEDLPIINKL  
KQWNQFIAEGDSYLEEIKRELLRDSIFVFTPKGDVIELPAGSTPIDFAFAIHSDVGGHCL  
GAKVNGTIASLDSELQNTQIVDIITSPNAKPNLNLW LKIAHTSKARSKIRQLLVQTGQAVA  
IDKHIVAARKSEKAPAESPQARPHAQDRAQAE AQRGRDEGFPSVVEFHSLKPGLVLRSEK  
AGVSVGGMRNMMIRIAGCCKPVTGDRIVGYVSRGRGIIVHREDCRSLMSIADFDERRIDV  
KWEDEAINTTARYRVTTKKTVDIFSEIESTVRKCSGRLKEGKLG ERGDGTLSGFFILEVD  
SHEDLRRVAKALRTLPSILSIEETL\*

>SPBDM4\_v1\_40099|ID:27157404| putative Release factor glutamine methyltransferase [Uncultured spirochete bdmA 4]

MTYRDMLLEAAHSFSSSETPFLDAVLLLCCSLDLPKEKVLAML PDRVENVPTS FHEMVER  
RRRGESVAHIRGFREFFGREFLVNDNVLSPRQDTEVLV DAALES GDALS KAFNTGEGASH  
LSVLDMCTGTGAVAVSIAAERPQWRVSASDVSPSALDVARENARLLPSPSISFIESDLF  
FSIEGRFDLIAANPPYVSRAQAERLVGAGWKDPLLALDGGIDGMKFVRAIIMEGHKFLSQ  
NGVLLLEMDPFQIPEATALFVKEGFCDIRTWKDLAGRTRVAGAHHG\*

>SPBDM4\_v1\_40100|ID:27157405|prfA| peptide chain release factor RF-1 [Uncultured spirochete bdmA 4]  
MRSRIAIEIELISKADILRDQQKYRTL MKERARLSEVIETFD ETQRIAFSIHETEALVED



GQDDELKELAEQELLQLRSRSLVLEERLKSLLMPDRPFADKAVIMEIRAGTGGEEAALFA  
ADLYRMYTRYADGHGWNLEVMNMNETELGGIKEIIFSISGGAAYERLRYESGVHRVQRP  
ATENSGRIHTSAVTVAVLPEMEETEIEIKPEDLRIDVMRSSGPGGQSVNTTDSA VRITHL  
PTGIVVHCQDEKSQIKNKAKAMRILRARLFEIEDEKRQAERSAERRSQVGTGDRSERIRT  
YNFPQNRLTDHRIDLTL YKLDLIMDGELDELLEALVAWGKQQTFFESGGREMA\*

>SPBDM4\_v1\_40101|ID:27157406|serS| Serine--tRNA ligase [Uncultured spirochete bdmA 4]  
MLDIRFIKDNLD AVRQNIRDRYMNADADLVVSLYDKRNGTLRELEDARRLRNENAQAMKS  
PLSAEDRARRIEEGKRLKETIARLESELQEVETSFAAEMAKIPNMAHPMAPRGKEDKDNL  
EVKRVGVPTSFDFPPKDHVELGQSLDIIDFDTATKVSQTKFYFLKNEGVIKLELALVRYAL  
DILSKHGFTLMTTPDVAKTEILEGIGFNPRGAESNVYTLEGEGETCLIGTAEITLGGYHSG  
AVLENEQLPIRFAGVSHCFRREAGAAGQFSKGLYRVHQFTKVEMFVYCLPEDSGQIHEEL  
RAIEEEIFSSLDIPFRVVDCTGDLGAPAYRKWDLEAWMPGRNSGEWGEITSTSNCTDYQ  
ARLNVRYRDEEGKNRFVHMLNGTAIACSRAIIAILENFQQEDGSVRIPKALIPYCGFDV  
IQPRRGI\*

>SPBDM4\_v1\_40102|ID:27157407| protein of unknown function [Uncultured spirochete bdmA 4]  
MSNEPNNNPSKHGNGKFRNHNFRRRKPARSAIQQEANASSQKPQAERATQELKICAVCGK  
PIFDLTGAIASREDGEPHFDCALELLSKEEKLTPDEKLMYIGSGLFGVCAQSAAGKLEI  
RRKIRWEAAGTIQPWRKPMMSPLP\*

>SPBDM4\_v1\_40103|ID:27157408| protein of unknown function [Uncultured spirochete bdmA 4]  
MKQSNISRDMPGWAGSTPDDFLLSKYDITEEMKATNWKRLYELKHKLIDDRYLEGAIASI  
AEMLSNTVKGKSR\*

>SPBDM4\_v1\_40104|ID:27157409| conserved protein of unknown function [Uncultured spirochete bdmA 4]  
MYVARGKLLKCTAQRGREGEDKALQYLAGAGWSILSRNFRARRGEIDIIAARGGILAFIE  
VKTANRYTREDLQHVIRAKKRSIIETS KLFLTMRKYNQYRIRYDVMLVQGDACVRHME  
GTFAEHDEAE\*

>SPBDM4\_v1\_40105|ID:27157410|rp1S| 50S ribosomal subunit protein L19 [Uncultured spirochete bdmA 4]  
MNLVQQIQAEQARTDLPAFRVGD TVRVSFKIVEGKTERIQVY EGLVITTKNAGAGKTFTV  
RKNSYGVGVERVFPYNSPRVEKVEIVKTGKVRHAKLYYIRTKVGKKS VKTLVGGGRKSDQ  
RQA\*

>SPBDM4\_v1\_40106|ID:27157411|trmD| tRNA (guanine-1-)-methyltransferase [Uncultured spirochete bdmA 4]  
MNIKLLSLFPEILEAYFSASIMKRAVGKGLVSFELVNIRDYAYDRHRKCDDEVFGGGAGM  
LMKPEPLDRALEAAGSPELRTIYVTPSGRLFNQAMAADLAREENLVILCGRYEGIDQRVI  
DTRVTDVVSIGDYVLSSGEVAAMVLVD AIYRLVPGVISGESLSEESFSAGLLEYPQYTRP  
EEYATMHVPEVLVSGNHATIARWRLKASLIKTLAYRPELLHTIDLSGEVGRLLKEVIDEG  
GENEPTANSGGTGKN\*

>SPBDM4\_v1\_40107|ID:27157412| putative Ribosome maturation factor RimM [Uncultured spirochete bdmA 4]  
MNDTRKPNYLA VARLGSVRGLEGELRLVSYSGEFSHIARAGEILVGGPLGLEDARPMKIL  
HVLQGGWGASIVFEGYGTPEEARQLAGREVFLPREQACPKKPG EYYVADLVGMIVTVGGL  
RVGVIAAVIGGGADDLLEVRLDRGGAALVPFRKEFVGNVDEEKGELEIVSSWILE\*

>SPBDM4\_v1\_40108|ID:27157413| conserved protein of unknown function [Uncultured spirochete bdmA 4]  
MERDLVEYIVKSLVDNPDAVNIKVIEGEKSTILELRVAENDIGKVIGKNGRIARAIRTIL  
SASASSQSKRVILEILD\*

>SPBDM4\_v1\_40109|ID:27157414|rpsP| 30S ribosomal protein S16 [Uncultured spirochete bdmA 4]  
VSVHIRLKRFGAKARPYRIVVMDSRSARDSKTIDELGYYHPIETEDKQLNINETKAREW  
LSKGALPSD TVRSLFNKKGIQLG\*

>SPBDM4\_v1\_40110|ID:27157415| putative tRNA-dihydrouridine synthase [Uncultured spirochete bdmA 4]  
MIPFPRNSLLLAPMVGITNRAFRTFVHEMGDADWYTTEMASAEAFLSGGRNESVYLDPA  
CPPRTSVQFTARSPDSLAAACRAMSKVPAERRPAGIDINMGCSAPHIKSSGRGAALLDNV  
PLAKEMVAAARES WAGPLSAKIRLSVTKGEEGTIFLAKSLAEAGLDFLVVHARFDTQKFR  
RKADHRFAVSLAKELLIPVIANGDISTAEECRSLASGNIHSLMIGRAAVREPWLFLRLH  
EELAGISVASAQKHDLIAIGLRYIDLAETLLPPEWQKETCRRSFSYYADNVTFGHHLKFS  
LINAPSLDEMRIILKKYFDEVPQDRFL\*

>SPBDM4\_v1\_40111|ID:27157416| Long-chain-fatty-acid--CoA ligase [Uncultured spirochete bdmA 4]  
MANTIPQMYIEITQKQPKANAQLSKDAQGKFQPTDYGTLLQEVGICASGLHKFGIKRGEN

IGFISDNRKEWLIADLAMLGLGAADVPRGCDATAQEIA YILSWSECAIVILENDRQLQKI  
LDIKAGRIPFTS QSLREAPYAHLKTVILFDPPPQSPQSA AEEARNAGLSVLFSDIMKEG  
QALHEKEPEFFQNEAAKGTNRNDIATIIYTS GTTGDPKGVMLSHGNFLHQTEYLPVLLGVK  
SGDVFLSVLPVWHSFERAVQYIILQAGATVAYS KPVGSILLADMQAVQPHWFTSVPRIWE  
SIKDSVYKSVRQSSAVKRAMFSVFIAIGE AHAYFRNMLLDRLPKFSSRSRVLDIGMAIIP  
FVLLTPLRALGDVLFVFKKIKVKLGTRFIAGISGGGALPPTVDKFFDALGILILEGYGLTE  
TAPVLGVRLKTHPVTGTGPIHRGTEIRIVDEHGNVLPAGQKGVIVRGPQVMLGYKRP  
DLTTKILSDDGWLDTGDLGMLTIHGEIKIVGRVKDTIVLRGGENIEPVPIEQRLCESTYI  
QQAVVLGQDQKYLAALIVPQQETLIQWAEENEIPFNDYTSLLDQPEVKELIDSEINAFVS  
MKNFGKPFERIFRFALLPTPFEAGRELSAKQELKRHAINELYKNQIRLLFTE\*

>SPBDM4\_v1\_40112|ID:27157417| protein of unknown function [Uncultured spirochete bdmA 4]  
MRTEGV DDFRIFIEDVQSIENIRRIVLRVSEGDITVIKSHDVYLRYYIELEGVSGEIDAW  
SCKVRAESIAILNVMGNDFVRISKCSVFIPSYISDIEVHSSRGSIQIRDMPSNVLAITE  
RGNIGVTGAKFVEASSVSGSINIEGSEGCSVRSIDGVLRCRISGSAQVEIQNGSAFIDQ  
VEKNVA AVSEQKINVRRVGGRI RLSSKGDIEFEVSGLFGGGEIQTYSGDISVQLEHSS  
VEFRAETLSGRIDTSHSVNTAGMGPQRCAFR TGDGARRLYVKS VLGDIENV\*

>SPBDM4\_v1\_40113|ID:27157418| membrane protein of unknown function [Uncultured spirochete bdmA 4]  
MNISDQKLQEFESTLKEIRDA AISDSKLFSDHDFRRAIWL SFGFSIVITAF CVAGHALI  
GNGDAATTHAA ILMFWIFIILLAIGGTIKITLISKIMARKNKTLFSVLRIVYGRGPLAVI  
IAAIVSIVVTS AFFMTAGPGSLAIPLSAMFISFGVFALDLRIRLPEFRALGWSLLILGST  
ALFFVQESPWLWGGLVWGG SFFALGVAGLFAMRAS\*

>SPBDM4\_v1\_40114|ID:27157419| Transcriptional regulator, ArsR family [Uncultured spirochete bdmA 4]  
MNLPLDKVIHERARLRILACLTSQPRHICSFTQLKETLDMTAGNLSSQLSVLERSEYIV  
IEKKFRGKKPLTEVVLTEKGSEAFGN YIDTLDQMIAALKSGK\*

>SPBDM4\_v1\_40115|ID:27157420| conserved protein of unknown function [Uncultured spirochete bdmA 4]  
MAEVVLT LKNVTKIY GKGEAEVTALHHISLAFGQGEFAAVV GPSGSGKTTLLNIIGCLDS  
PTEGELAWK GARMKSMNKTELATYRRTHVSFVFQSYNLIPVLTVTENVELPLLIEGNHDK  
AQIHERARAIITMVGLADKANRYPTELSGGQEQRVAIARALVKKPSIVLADEPTANLD SH  
AAGEI IELMGEINKKTNTTFLFSTHDPRI MELAHRITLCDGQVESDERRAP\*

>SPBDM4\_v1\_40116|ID:27157421| putative ABC-type transport system, involved in lipoprotein release, permease component [Uncultured spirochete bdmA 4]

MKADNRMLFQIALRNVARHSRRTAITAVVLA VGIAVFITFQSLLAGMDRVTIDTAIDYDN  
GSISVRSKDYEAHATSQPLEYGIQDPEGVMGGLAALLPVGSTWTPRTRFYVQVSNWADET  
PALAFVVRPDTDRKVFKTAQKVVG GVGVTTKAVVGTDLARDLNVKEGDSIVVTA VLPNG  
SLNAIELVGGIADLPLYSLSQAIYMTTQDAEALVDAPLPVTEIDIRLPPASRLDVLVA  
QADSAASRIEKNNDLAAV SIGEAMRDYLAMRNMKSKFAYIII VIVLLISSVGIFNTILM  
SMYSRIREIGVLAAYGLEPKQIKRLFSLEGTLVG VIGSTGGVLLGAVFVWWLTSRGISFG  
GMFGNLDLGNLPKDLFIRGEWNPATFAQGFIFGV L VSWLASLMPARKASSIEVTEALRFV  
\*

>SPBDM4\_v1\_40117|ID:27157422| conserved membrane protein of unknown function [Uncultured spirochete bdmA 4]

MNLSIFAWRNLLRNTRRSLLA VLSTFLATLMVVAGNGLTEGFLDSMVRNYAKNETGHIHI  
TTAAFRERSRFMPVDEYIPDADALAEKIEGLSPGSSQAEHLLA APRIRFGVLLSSGPYTK  
PAVVIAGDPEKEKFLMLNRNIPGGSYCDEPGTAIIGSGLAADLELKVGD TLKTVATRS  
DGGIGFKSLRVSGIFQTGTNALDGS MFQMRLLDDAQTMLAMPGGAQQILVMLPDYRQANAW  
QKKISGALSTEE SANLSVLPWSAIGEY PKVIQLAEAIYIGMWF FIALLGAFI ANIMTMV  
VLERRRETGILMAMGMPPAKIVLSFLIEGTMLGLGGSVLGTAAGIAFNATFSRKGFD FSS  
ALAGFSWPIDNTIRPTISLSGVLSGILFCTVAAALMSFLPSWRASRMKVVDALKA VQ\*

>SPBDM4\_v1\_40118|ID:27157423| putative Negative regulator of sigma E activity [Uncultured spirochete bdmA 4]  
MRVQKSRSKIRFPAIVAILCVAGVISVSAQAAAGGGFSRE AQAILDAIDAAQQYSSISYV  
GMMEITQGSRLVKKQFAAYARGKDRVFLFSNPEDRGVRMLRLGSSIW MYFP SERD TVRI  
SGSLMRQGLMGSNLSYEEVAEGESLKDFYSAEILREETLDGQPCKVLKLS SRTDISYPV  
RILWVDNTREIPLKIELYARSGILMKTMYIKNVEPISGRLLPTTVEIVDALKKNSKT LFS  
MDSVRLDIMLTD SMFSMEALTK\*

>SPBDM4\_v1\_40119|ID:27157424| protein of unknown function [Uncultured spirochete bdmA 4]  
VKVLEQRRKVPLRASGGRKDQSSHGACREDTGRARSPRALSFMRIFGAAALGAWVMLCPY  
RSSAQASLVFTSTTG VATGVAALSATPSAGFDEEIVLNGRLQTGPLRV TALTSVSFSTG  
LASLGRWSVFSSGQTLRWSWPAWSSRAASPD TLASIEIEELAAALSGTLAHTGFRIELGK  
FPLKWGVGKAFRPSDIFKTM DYASLIPASKGLPAARLALFPSPLSRFEAVASIDGDSTVT  
AGARYLTALGD TAAIAASGRRRQTGA ADEYSGSFEGQIDAGIFTPYTELSVRTDGSSAY  
AITMLGSSLAAGDV TLWLEGQASFGPATMNAQLFLLGTWKVSELTSVSMPVFWFDDARIL  
SASALAQFQGILDGR LDITATGRWLSATTPPGFLWKLSAYWTRSLSTY\*

>SPBDM4\_v1\_40120|ID:27157425|IleS| Isoleucine--tRNA ligase [Uncultured spirochete bdmA 4]  
VYKPVDPKVNFPQ QEESVVQFWEERKIFQKSISQRESAPEFVFYDGP PFATGLPHFGHFV  
PGTIKDIFPRYKTM RGYRVERRFGW DCHGLPVENLIEQELGLNSKTDIERYGIAEFNEAC  
RSSVLR YVKEWRQIVTRLGRWVDFDHDYK TMDPDYMESIWWVIKSLWDKGLIYEGHYILP  
YCPRCSTVLSNHEL SGGYKDVHDP AITVRFKITS LPA SNTDPAFAGLADGSTYFVAWTT  
TPWTLPSNLALAL GPDIDYVCVVDGDER YILAESRLSAYYKHPE SLQLAWKKKGREL AGR  
RYEPLFPYFASLSEKGAFVTVLGDHVTTEDGSGIVHTAPGFGEDDYEV LKGTGIPTVCPV  
DAECKFTDEVPDYK GIFVKDSKAIMERL KQEGKLVKRDQILHAYPHCWRCGSPLIYRAI  
SSWFVKIEPVKGSMLRANKSVYWVPSHIRDGRFGKWLENARDWAISRNR YWGNPLPIWKC  
DTCGKTVCVGSRKELADLGGDVPEDLHKHYIDKTTLP CSCGGTMHRIPEVLDCWFESGAM  
PYAQNHYPFENKEKFEAKFPAD FICEGLDQTRGW FYTLTVLAAALFDKPAFKACVVNGLV  
LAEDGKKMSKSLRNYTDP SKVMDKFGADALRLFLMNSAVTKAEDLCYSDEGVKEVLKSVI  
IPLWNAYSFFV TYANIDGFVAEGFDCSDVENPLDTWILSVCEKLVADVTAGLEAYDLQAA  
IGPMVEFVDSLNNWYIRRSRRRFW KSENDADKKSAYKTL YRVLRRLTFVMAPVIPFVTET  
IYQNLKLEDEPESIH LAIWPAEEVRYRNLDLERDMRIVRQAVSMGRALRVANDLKIRQPL  
SSVQLITRQPEEQEVL TRMEDILREELNVKSVIIHEKEEDLVEYHAKANFRVLGKELGPD  
MKEAATQIANMSGAEIVHILNGATAPVTLRS GRTISLDASRVEIVREKQGLKVLNEGTL  
TVALDTTITEELLHEGYVRDLIRGIQNARKEAGFEVTD RIVLTVSGDEELHAALERFSQL  
VAEETLAVKIEWSDQAKGISVEAGEKTWTVSLAKA\*

>SPBDM4\_v1\_40121|ID:27157426| protein of unknown function [Uncultured spirochete bdmA 4]  
MSGESAFEKRRHKMVVPRGIALFGALLFIAFFVADRELISPSFPRDFVRISSRLDAWENR  
QEGFRLVLVSND DRAQGFLEWGALGLYGRVVEAKADGSARTFFLGDGGMNGIELTTAMRH  
GSIEVHYRPPVHPDTK GSGGLQEATVAGTRLKAADGLRILAAQYKKTQKDGRGISLRLQY  
LGAGQASQAHTFDEVLRRGESPYQMAAFRRAQ QEEASLNVYQAPAELS QSQRTVQPEQSQ  
RSVPPLEYEEIEYPVFISDDFVSVA TQR YLFNGGAHGAASTDFDVIDRKTGVRLGLSDIF  
AGDDWKAGLVPLLKAELVRQHGFQNGQNEAGANTRDSGDPARAELKNQGQDDLRTLGLFE  
PDIWPSEDV FVCGSGIGFEYDRYQIAPWYMG EFILVLPWSEVKPYLSPALLSAGLFQ\*

>SPBDM4\_v1\_40122|ID:27157427| exported protein of unknown function [Uncultured spirochete bdmA 4]  
MKFVKRFLPVLVVVALIFASCATNTGQVPQGTETPPAVTQGGQQAQPQAQPQPPSVEKY  
ELQNLFQQANTLKTEATDFDLKSVDPDGFLAAGNQHDAVAAA YNNLVETPAQYDGVKAYP  
LKAELN LVSTWDALIQKDMP IRADAAAKHAD EMQAAADNADARTQAPM QYDAGLRYYSQ  
ASAFKEASNYAQTITSYQLAAVAFDAAAAAA QVNVLRADIEANGYSKYESIQMYFTMGED  
KYKEA QDLWQKDTLDDMSASAASFKEAQ NYYSFVVTKGAE LKALEGKDKASGAQAEALQV  
KADV NAPDEYQQALDILAEADQSMQEGSYVKAYSSYWDAASAFETARDAAGAKQQEV TDA  
IAKAEANLTD AKDRASELGLEDNIYLTAATEHL DKAKALKEEVLYNDALFETNEVSNYIG  
LSDNFVQQEAQIREKARLEQLAKDKAAAEAAIADAKARMAWADQVDIQSDYPKEYKDAST  
SMAGAEIAYNNEKYVPAKTLADEVSSTLSDEFQQQVLAAREAAKAKAAQAE EEARQKAAN  
KQAADVAIADAETRM AWANENQVRNDYPDEYKGASVAMVGAYVAYGNEDYMLS KQKAEV  
SGILSNDFQTQVAADRAAKEQLAQDKAAADEVM PKARDRMAWADQNNIKADYPT EYNDAF  
TSMSAAEIAYNNEKYAPATELANEVLSTLSSDFETKVASDRAAKAMQVEIEKAGKAANAL  
GAAHSRMAWADQVKLASDYSDEYRDASTSMQAADSAYSQKEYDATVILANDVVRILSDDF  
MAKVNGERAAAEAAVAQLAQDKAAADEVM PKARDRMAWADQNNIKAEYPNEYKDASTSMS  
AAEISYSNEKYVPATLANEVL SILSPDFEAKVAADRAEKARQAAQAAVAQNMKYAQTAI  
ADAQSR YDWAASKNAANNYP ELPFKQGGEALADAKTAYNALDYTRAKDLAAQSYWTLMQIN  
EFAPLPSTYKVRLIPQRDCLWR IAEYTFVYNNPYKWPVLYQANKATFKDPSNPDLIFPG  
QILKIPSIKGEAREGAWDPDKTYQPLAK\*

>SPBDM4\_v1\_40123|ID:27157428| putative M18 family aminopeptidase 2 [Uncultured spirochete bdmA 4]  
MEQKIKRLMDFIDASPTPFQAVDSLISMLGAMGAQGLDERQVWQLEPGVVYYVSRGGSSL  
VAFRMGLKAPAEAGFLLAGAHTDSPALKIRPEKELQSEGYMRLALEPYGSPILSGWLDRLP  
LGVAGNVAVRENDGVLLRFYISHEPFAVIPNLAHNLNRDINKGFEYNPHQHMPALFLGLAS  
SLAPEKSADTPPGTSEIIRVAAELGVEPAIVSTDLRLFDIEPSRLIDGSLINAPRLDD  
LAGCAAVMEAFVGVQAATQVACFFDAEEIGSMTLGGAQSSYLRLDILARITLASRNSGQ  
DFYRALSCSSSVSDASQAWHPGYPDKFDEFYTPVLGGGVAVKSNANMNYATDFTSMQIA  
EIAAAKANLNIQRYMARADIQPGKTIGPITASRTGIPTVDIGHPLLAMHAIRETIAASDH  
LDMIAFLRAFYS\*

>SPBDM4\_v1\_40124|ID:27157429| protein of unknown function [Uncultured spirochete bdmA 4]  
MPYLSIGQLEKLLSVPASTLRFWEKSVPLTPLRTKSGRRTYSLSEVALIARLKHLALDR  
KFGLRRAQRLLFEMLYEDQDYRANIKALRDGILLMMESGQWQQAYRDFTVNAKKSQKE  
LFDGAEDQAFDGFH\*

>SPBDM4\_v1\_40125|ID:27157430|der| GTPase Der [Uncultured spirochete bdmA 4]  
MNKKEVARKISPPGSAERQADIDISPAVRYENLPLVVLAGRPNVKGSTLNFNLVVKRRA  
ITDPTPGVTRDPIEEECCELWGTGRRVLMADTGGFRLEREGLDELVVARTLAYIERASLIL  
FMVDVTEITPEDEEFAAFLRPYAKKLVLVVKADSPERDALVWAHARWGFDPILFVSAEH  
NRNIDELEDAIVARLDFSRVREVEIDKADIRIAIMGKPNTEGKSTLLNALVGHERSIVSSE  
PGTTRDVVEGRFLYKGRGITVLDTAGIRRKKKVTDNVEYYSVTRSIADVSRADVVILLID  
AEEGLSDQDKKIAFAVEAGRPVVLALSKWDTMPTMKNAFEAARDRLRFFFGQMAYAPVI  
AISAKGGQIDKLMSTVVSLYGKANKVIETSRLNQAVAAWVEESPPPAGPHTRFKLRYAV  
QASVNPQRFFVTRPEAVAESYRSFLKNKIRLELGLDGIPVQLELRASRKDRLRS\*

>SPBDM4\_v1\_40126|ID:27157431|ptsI| Phosphoenolpyruvate-protein phosphotransferase [Uncultured spirochete bdmA 4]

MRITKGIAVSPGVSIAPAFIFIDDSAEIPQYHITVADVQSELDRFREASLLAKREIEALR  
DHAKKEAGEEQAAIFDAHLMMLDDPELLDQIEFSLNDNLFNVESAILSFEEMVDKLS  
PDPLIQERVSDVHDFRRILGHLKKERISLSDIETEILVAKDLLPSDMVSMRSMVRG  
IVTEAGGRTSHAAILARAFEIPAVLGVGPDFVDQVKPGQPVYVDGKEGIVAVDPDDVFIQ  
REKAARLARVQREKENKGLREVFAQTKDGRISLVANIEMPDEVNTAIEYGAEGIGLFRS  
EFLFLGGHVPGEQQCKEYTRVVQTMQGRPVTRTLDIGGDKVLPGLGAMGEKNPLLGWR  
AIRFCLEKTELFTQLRAILRASIHGKVKIMFPMISTIDELIRAQGLLAEAKWECKAHGH  
SVEPNIEGIMIEVPSAAICADVLSRSCDFFSIGTNDLSQYTLAVDRGNQKVAYLNEPYN  
IAVLRRLIRMTIGYGEHAHIDVSLCGEMAADPASAVLLVGMGLRRTLSMSASAIPAIRVLM  
SITIEEASALAHQALSMHTSSQISALLTSKLNL\*

>SPBDM4\_v1\_40127|ID:27157432| protein of unknown function [Uncultured spirochete bdmA 4]  
MGIRLDRNNWVYYIGRGSNLRALLSIGCMLVLLGSSFRPSPGPMASARGGSDINDPAVAE  
EIAMPEPEDKLVKYSVYEVKKGDTLSEIADEFDVS�DTLISINGFTSAKSLRPKQLKVP  
NQSGIIVASKASTVQEIADAYNISADRIDANGLMSENISSGRPLFLPDVRLPAAKLRE  
IAGTLFQWPVRGRLTSWFGWRKDPFTGRRSFHNAIDIAAPYGSIAAAMPMDGRVIETGYSP  
ILGKYVMMSHSGGWKTLFGHMSEILVREGQYVSQGRTLGRIGTTGYSTGPHVHFEVIKNG  
ILVNPLNYLP\*

>SPBDM4\_v1\_40128|ID:27157433| transposase (fragment) [Uncultured spirochete bdmA 4]  
MVGKLPIGQKELIWSRVKVMVGEQQLSLKEASITLNVSYRQAKRIVSRYREQGEAGLLHG  
FQGRSNHCLGSVLCERVFEAYRTTDTAMQLL\*

>SPBDM4\_v1\_40129|ID:27157434| Iron-sulfur cluster-binding protein [Uncultured spirochete bdmA 4]  
MSDAKRADVALLRCKSYESRELDIIAQAAGIAGFPDVEGATILIKPNILNASPAKAVT  
TNPAFVGAVIRFVKSRGAKSVLVGDSPGWQPSVLAAKTSGIYDAIQHNGGTWTEFREVSP  
HPIANGKLRNIPLTTMIEQADIIINLPKLNHRLMTYTAMKNLFLGLIPGTAKSALHLQ  
YPAVVDVDFGEMLVDLALSVPNCFTFMDGIIAMQGEQSGTYPYSLGIVLASQSVAMLDWVA  
AQCAGYDPARIPYLDGMQRTVGSATIAEPATYPLSEAEIGHEGFEQLPYSELGHRLST  
LPNTLRSFAGSLIRLPIFHTKKCIGCRACVEICPAKALRLDCKNRSNIIRIDDRLCITC  
FCCHEVCPAKAITIGRAPLRIHRPRNQPTAS\*

>SPBDM4\_v1\_40130|ID:27157435| Fumarate hydratase class I aerobic [Uncultured spirochete bdmA 4]  
MAHISLDNLHGWGSESDFEPINLSRPREEGHIIILRAEALRDCARIAFSKIAITMPNAQY

ATFTEIIEDPASSPRERFVAASLLENALIAARGTFPLCQDTGTALVYGWRGDRIDIESDA  
DPEELLAQGASEAYAQEKLRSQMGPLNMTEERNTRDNLPAGIQIRSVRGDALKLVFVAK  
GGGSTSRTSLTMESPAILRKDRLEAILDARIRALGPSGCPPIAIAVVLGGTNPSQTLYAA  
ELAALGLLDALPESAPGDGTPVRDRLWEQKILAIARESGLGAQWGGSHLAISARAILSR  
HAANLPLAVAVSCAANRHLAVYVNRGGWHIQKLVPEQKLEETVKGLIRQVSSTAPSVEI  
SHTDTAWLEELRSFAAGSMVLLSGPVLVARDAAHARLLKILETEKKLPDWFGLPVFYAG  
PTEAKEGYATGAFGPTTASRMDNYLEPFMGAGASLVTIAKGSRGVEARKTIARHRGVYLA  
AIGGAAALNAERHIRSLSTIQFEELGMEAVRVAVLERMPLIVAIDSKGNDIYRA\*

>SPBDM4\_v1\_40131|ID:27157436| MutT/NUDIX family protein [Uncultured spirochete bdmA 4]  
MIAGDGNARKWITLSSRKVYECNVFSVFEQQSQGPDGRIGHFSVMEAKDWA VIVPYVQT  
GQDTSFLMVRQYRHGADVVSLEFPGGVIEPGEPAHAAARELAEETGWVSERILHAGTVF  
PNPAVQDNHFHIFVALGPKPQVDRNLDANEIIDAHLVPADEVRRRMGEGELQHALMVAAL  
HLADRLVASLGPQP\*

>SPBDM4\_v1\_40132|ID:27157437| Glycerophosphoryl diester phosphodiesterase [Uncultured spirochete bdmA 4]  
MMRSRIHHRARKTSRRRTRHKPFFCVLFI FSVGLALCGQNRPENLSMERLIMQPSRPLVI  
AHRGFRGIAPENTLVAAQKGYDAGADMWELDVAASSDGELVVLHDNTLVRTTDAKARFPA  
RSPWNVYDFTLAELKSLDAGSWYSQTDPFMQIKAGRVKSEELQSFAGIKIPTLREALELT  
KRLGWRVNIKDATGFACDSWIVERTVALVRELDMVSSVLISFNHVYLRVKKAAPEI  
AVAALIDKPIENPVQTLKDIGAIALNPAQYLDEATVKAVRAAGFGVLSWTVNDPSRMTD  
LITWGVGTGIITDFPDLGLAKTKALH\*

>SPBDM4\_v1\_40133|ID:27157438| ugpB| glycerol-3-phosphate transporter subunit ; periplasmic-binding component of ABC superfamily [Uncultured spirochete bdmA 4]

MKRVILLMAVLLMAVGAYAQTTFEFWHAMTGHNGEMVQAICDQFNASQKDYKVVVPVYKGS  
YSDTMNAGIAAYRAGQPPAIIQVYEVGTATMMAAKNAV KPVYQLMAENNMKW DSSIYIPT  
IKSYYSTSDGRMLSMPFNSSTAVMYYNKDAFRKAGLDPEKPPVTWPEFFEVAKKLKASGM  
EGGFTTNWISWIQLENFSAWHNLPFGTRSNGFDGLDTQLVFNSPIHVRHFQNIYDLSKTG  
VFIYGGRENKANPLFTSGRVGMHFESIGGYGNMKATCKFDGVARLPYYPDVP GAPQNSI  
IGGASLWVFNGKSKAEYKTVAEFFNFISQPETQALWHKETGYLPITQAA YELTKSQGYE  
KNPGLVAIKQLLNKAPTANSMGIRFGNFNIIEIEDQTWEEILAGKISVKDGLDKMVRE  
GNKTLREFEKLYK\*

>SPBDM4\_v1\_40134|ID:27157439| ugpA| glycerol-3-phosphate transporter subunit ; membrane component of ABC superfamily [Uncultured spirochete bdmA 4]

MSKQYEFKASILPYLLVLPQM VIVFVFFFWPAGQAVLQSFY LQDPFGGKMIFVGFQNYSK  
LLADPDYWQSFSVSTAFAVCITLGAMAISLFLAIQANKKIRFASFYKTMLIWPYAVSTLV  
AGVIWLFMFNPVGVIA YVLKHTFHVDWQYLLNFNQAFLLLTLAATWKQLAYNFVFFLAG  
LQSVPATLIEAAEIDGAKSGTRFWKIIFPLLSP TTFYLLVMNLVYGGFFETFPFIVHSITQG  
APGKSTAILVYKVRDGVINLDLGSSAAQSVILMMLVIMLTVFQFRFIERRV TY\*

>SPBDM4\_v1\_40135|ID:27157440| ugpE| glycerol-3-phosphate transporter subunit ; membrane component of ABC superfamily [Uncultured spirochete bdmA 4]

MAELTHNSNKA AHRAKLIRRTFPHIMLWIGIVILFPIYFIFSASSHTSAEIQAAPMPLN  
IGPHLIENYRQALFKGTQNMGTPVLTMLKNSLIMALGISVGKIVISLMAAFAIVFFKFP  
RNFCFWSIFITLMLPVEVRIMPTYKVVADLGLLNTYAGLILPMIVSATAVFLFRQFFMSI  
PREIAEASQIDGATPMQFFRYILAPMTRTPIAAMFVIQFIYGNQYLWPLLITTKPEFYT  
LLIGINRMMMSGADVQIEWQIAMATLLAMLPPVIVVVL MQKQFIAGMTETEK\*

>SPBDM4\_v1\_40136|ID:27157441| uxaC| Uronate isomerase [Uncultured spirochete bdmA 4]

MAQFLDENFLLKNETAKRLFFHVAKDLPIFDYHCHLSPQAIAEDKPFDDIARMWLEGDHY  
KWRVMRANGEPESLCGGKGPWDEKFA YARSLSKAAGNPLLQWSHLELRRIFGISEVLTP  
QNALEIRGKANHV LASERISPRSL LAKFNVKVLC TTD DPVDDLHWHKAI AEEQKAGSGFQ  
TKVLP AFRPKALNAGDIAAWNKYVDELGKAAGTEIGSYEALLDALAKRHNYFHAMGCRL  
SDHALLVPPYAPASETEL DII VKKGRRGAELSPVEQEKLATALLHFARLNAQKGW TMQL  
HIAALRNVNPR LFKAFGPDVGGDSTSDAPIIAPLASLLGAL ENEGHLPK TILYSLDPSKH  
NPLAVLAASFAGTSPFDNASQVPGKVQLGAAWWFNDQKDG MERHLKEYAGVGLIGVWVGM  
LTDSRSFMSFPRHE YFRRLLCNAVGEWVGAGELPDDPLYTDQLVRGICWENAAHYFGML\*

>SPBDM4\_v1\_40137|ID:27157442| 3-oxoacyl-(Acyl-carrier-protein) reductase [Uncultured spirochete bdmA 4]

MSFVESLFNVQESVVVVVTGGGGALPSSIAVAFKAGAKVALWGRGTHHPMTRAADQVKKQ  
AGLPAEDPNVIGVTVDTVSSAACEAAFDKTVKLLGMPDILLNGVGGNMGRSSFVDFDEKV  
FEEVLRNLNLMAGLMVPSRVFAKRWIDARVKGSMINMTSMASYKGLSAVWAYDAAKAGVLN  
LTQALAKELAPHGIRVNAVAPGFFVGNQNRALLFDEKTGNLTTTRGEAIIARTPFGRFGEY  
EELWGAVLYLASPKAAGFVTGVSIPVDGGYLSJNI\*

>SPBDM4\_v1\_40138|ID:27157443| conserved membrane protein of unknown function [Uncultured spirochete bdmA 4]

MTDPTIATIILLGSFVLLMILRVPITFSLACASIATAAYLHIPLMAIVQQMVQGVKSFSL  
LAIPFFIIAGEMMGRGGIALKLINLANVLVGRIRGGLAMVNVVESMFFGGISGSAVADVA  
STGTIMIPMKQKGYDDDFSVAITVTSATQGIIPPSHNMIIYSVAAGGVSVGRFLGGF  
VPGVLLGISLMIIAYIISVKRNYPKERKYTFKEGVKIFGDAFLGLLTAVIIMGGVISGIF  
TATESAAVAAYAFIITFFVYRQIPLKEFKGILYSTLKTMTMVTLIASASAFSWLMAYL  
RIPAKVTEFLISITDNKILLMLINVLVGLMIMDMAPLILIVTPILYPVVVVKLGLSP  
IHFGIILMINLAIGLCTPPVGSALFVGCVAVGKVSIEKATKAMVPFYVMVIVLLITYVP  
QITMFVPLVMPGG\*

>SPBDM4\_v1\_40139|ID:27157444| Tripartite ATP-independent periplasmic transporter DctQ component [Uncultured spirochete bdmA 4]

MKKFLVSAVTLIHILLINLSMIMIVAMLLLVFANVVLRYVFNNGIYWSEEVALVLEVWFI  
FLSLGLGVKHLRHSINILKRESVSAWLNKALDLLSDIIFLIVGFVMIVYGGKLVQFTMR  
SIMPATKWPAJILYVLPVPIAGFVVVEALFHILGYNMFDEKIDKYLKGGKIRDIRSE  
S\*

>SPBDM4\_v1\_40140|ID:27157445| TRAP dicarboxylate transporter, DctP subunit [Uncultured spirochete bdmA 4]

MKKMHRAVLVLLILAPAMLFAQAKPIVLRRLAETHPQDYPTTRGDYEFARLVKERSNGRI  
IIEVYPGSQLGEEKAVIEQVQFGAIDITRVSISPVASFVPKLNAFQMPYLYRDADHMWKV  
LKGDIGKELLASLEPFGLGWFDDGGARSFYNSKKPIYKPSDLKGMKIRVQESLMMGL  
VQSFVAVPTPMPYGEVYSGLQGTVIDGAENPPSYYSASHYEVAKYYTLDEHTMVPEIII  
GSKISLGRLSQADQDLVKQAAFDADFQRAEWAAYVQLSMDKVKAAGCTIISIPDKTEWM  
KAVDPMYKKQPKQKQDLVARIRAVK\*

>SPBDM4\_v1\_40141|ID:27157446| protein of unknown function [Uncultured spirochete bdmA 4]

LNSAHEIQRRGSSNSLSAIAIWLQDHFMEISIGIWDVAREL RVSPSHLSRVLKKEIGI  
GFGETLVRIRIARAKNFLANGISAKEASSLVGFRDQSYFTKVFMKIEGVSPSRYIEQIQS  
PQ\*

>SPBDM4\_v1\_40142|ID:27157447| protein of unknown function [Uncultured spirochete bdmA 4]

MIHILVADDEALEREAMLHILTGAKLGEPIQVEEAANGLEALKAAQARKPDIAFLDIRMP  
GVDGLGVAEKLSLLPDPPIIMVTAYDYFAYARTALRFGVLDYLLKPASTEDVYAALRRA  
LREITKKKEETARRLAAQTMAADLEAVINADICNSLRVGTVDGDIQRLVTFRTGAATWD  
CIAMVAGTARPLADDASSIAAREFSRFFYALAERFLVSDLGLGKANPMLFIASQEQDAK  
TEAVQTNSPIMNLLLVIHAVRVPHADASQSFLDIRHVREQVGG\*

>SPBDM4\_v1\_40143|ID:27157448| putative Integral membrane sensor signal transduction histidine kinase [Uncultured spirochete bdmA 4]

MHIPRPGIRGKILICFAVILAFFLGLTVMQNESIKLSREYGENLSSYHLVHRFRLNLGS  
FHALADRYLREPLSVDVEDVYTGIAASLNAQYAVLIPLDVSIPVEFEVRATGYGLDAYLP  
LVSRAVGLRAGGSPDYQAFVKATRIEGYIDVYLNRMLSALMQNGEETYAKLSRKSEILN  
RTVFISMILVSILAVVIIVLVAEAITAPLRLAKEAEKLAGGDLGAGIVEAHTKDEVETL  
THSFATMATSIKEMVEGLKEKAELEKLLHEEELALVSMGKALREAQFMNLQEOMKPHFLF  
NALNTIARSALLEHAPKTESLSLGLATLLRATIKDSGALSGLDEELTVAQAYLEFQHARF  
GDRLQWKIDVPSTLLSARVPRMLVQPLVENAVRHALEPKLEGGSVYIKARKRKGKLLWV  
LDNGIGMSRERLNEIRSNIASLTSKTYGQGESFAGMNAEIPAIAKQELGNENALLEGTTGI  
GLANLATRFAILYGDTCRFEIQSKLDRGTLVRVIPLGAAIE\*

>SPBDM4\_v1\_40144|ID:27157449| conserved protein of unknown function [Uncultured spirochete bdmA 4]

MRLSRFSIGTGDRFGLGEQAIAAFKELRAHGGEADIVWNKSNREHVIIIGSSPADQANAA  
AASVTNTGWDGKWFVDADHISLKTIDWFLPHCNFFTIDVAETIGRQASAGARAAAYLAQAQ  
FLLEKGAAPVPVTQGDIVADKFLAAVQEAGNTYRYIAARKPKDSFVVELSMDDETDAQP  
TPAQVAAILVAVAAEKIPLSTFAPRFPKFLKGIDYVGDVAEFLSAFEAETKIVLWAADR

LGLPKGFKLSVHTGSDKFKLYKGIHEIVTRLGAGVHLKTAGTTWLEEIIVGLAEADGEGLA  
LAKRVYAAAYARIDELTAPYANVVEIDRARLPRPDEVAAWDSKTFVNALRHEPGSQTMQP  
DMRQLMHVGFKIAAEMGEEYTDALVEYRESVARNVQSNLYARHLLPIILG\*

>SPBDM4\_v1\_40145|ID:27157450| conserved protein of unknown function [Uncultured spirochete bdmA 4]  
MYIYEKNPDRSIHQSELELLVERTIEGSGALTSKRILIIPPDITRFHSRAGRITDLLVAK  
LGSRVAAIMPAIGTHAPMTGEEIAHMYPGSPASLFRIDHWRRDVAELGRIPEARVSEISG  
GRVRYSPVQANKLLSSGEIDFIFSVGQVVPHEVAGMANHAKNIFVGTGGKEAIDRSHYL  
GAVCGMEGIMGRADTPVRALFDEALGVAAGKIPPIAWILTVIGSAEDGSLAPRGYFASLD  
RRCFEEAAALSAQVNIQLLEKPVKAVVWLDPEEYRSTWLGKNSVYRMRMAMAEGGELLI  
FAPGLRSFGEDPNIDAVIRRYGYRPGAIEIQLSVAREPALADNLSAAAHLIHGSSEGRFRI  
SYAPGPSISREEIESVGYRWTDLDHALKRYAPHGRLAGFHHTADGEELFFVNPALGLWS  
TATRMQGA\*

>SPBDM4\_v1\_40146|ID:27157451| putative Integral membrane sensor signal transduction histidine kinase [Uncultured spirochete bdmA 4]

MKVKLRTQFAILTVAVTLFPIVFGLLFFTGQQAKRDPREPTRIFLNEVAERWGRNRNLTI  
EEIRMAGEQSGPLPIIDAALIAPDGTVQVSSFRELPAKIKLEVEDLVKPPLLPMGKPRPEL  
RFLPIDTNIIEESPLLLFDIQQPFWREDIRNRNFMILITSFALGAFLVAGLMSFLILRSTNR  
AIQNLIDDTATVASGKLDHEVKGSGAEELRSLAESINRMRLTLRDMISRRMNMLIGVSHD  
LKTPIALIQGYTDALSDNMANDEATRIHYLEIIREKSAQLEDLVSDLIEFMKIDDFNTPQ  
ETVDMAPLMISLGRFEEDARLLGLELTYGFGRLGSPLSKEAPPNIPKIRMNRMLFERAI  
ENLVSNAFRYTGPGGKVEFLMHVEEGHPVLIVADNGPGIPDDELPIYFADFYRGTHSRKE  
AGHGLGLTIVKSMVDLHGWSIEARNRRLSTASAGGVSAGGPRTGAVEHGLEITIRMKASA  
\*

>SPBDM4\_v1\_40147|ID:27157452| Two component transcriptional regulator, winged helix family [Uncultured spirochete bdmA 4]

MHGRILIVEDTKELAEYMLYLQNEGFECRLAFDAESALPLARNEDWDLIVLDLNLPGMD  
GFQFLEQLRKEKSTPVMILTAREADEDVIFGLGVGADDFVTKPCPPRVLASRVRAHIRRT  
ITLQTRQNGSIVKFGPFELDIEGMYLTKDGEPVGISAREFNILKELVTNPGKPFTEPDL  
AHVWGQEYGDISAVGVYIQRKLEDDPANPFYIQTQYGMGYRFNPEAFATGANP\*

>SPBDM4\_v1\_40148|ID:27157453| exported protein of unknown function [Uncultured spirochete bdmA 4]

MRTRNMRGLGPFAAIALFALCAGSLWAQTSTASASETTPAVIDENLLFGGPTDIVTVIDP  
DTASAGTVQLVKDTKTYPVFLISGSAGAGLYGNYPVGVATSSDSQVLYGAVNLSGLEFDY  
LPTKNLHFSVSNDLLAVPNDILAASVTAYADLRQSDLVRLYAAGSFNYDPSNYLSTKEYD  
SGTFSLDELFDVTQINEKVVFFRLGKQRISWGVGYWYKPSDVLSLSAIDPDDPTAARNP  
AFKIDVPMKLNHLMVYMVPPVSGLADSSSMAAKYDLVVNGWELSFAGYGRADMLARPRAI  
FSFTGAVGAFDVGENVLLYGSDRTYVRESSTTLGTYETYRQENSPFFQSTLGIKYSASY  
SSGLSYAFHVQGYNGTGYADATILQVPDARTAVKNSTTNTAKQTNDLTQTGQWYLAGSA  
SISGRFGEGRSLTQVTGSAYALANFSDGSMRFNPQFEVAIGDQGGRATLTLSDLTAIGAA  
GSEYAPAGNRTTPALTVGILNDAFELQTSVPITFNTDFSVKKVQTAFSVFWNAVQY\*

>SPBDM4\_v1\_40149|ID:27157454| conserved exported protein of unknown function [Uncultured spirochete bdmA 4]

MADVRGMKMRFLNAKLTSKLSIVLFLGLVLIFSAKAQGGPPPGGGGGGPMGGIGLPLNFLQ  
ADKDYKFPDDITKYTANDFLMLVRRDIRSSFYNSDMSATISMVTVSPDRGKTFFKQQIF  
RRDKDDAFLMLMVEPESRKGQGMLRVDNNMWRYDPTSRSKFTHTTLKDTYENSTVTNNDFR  
RWQRSIDYSVEKLTSTGLGNYKVIIGELKANNDVPPFYLMYIETDRKIVLKIEEYSLS  
MKLLRTAYYTQYVQIGDSFVPTVQIFQDGLIPEKRSQVTTYTDISTKLLPDYFTKEYLER  
VSQ\*

>SPBDM4\_v1\_40150|ID:27157455| membrane protein of unknown function [Uncultured spirochete bdmA 4]

MRLIHLKLAARNVRRQPHRTIALGGAVAFSALVMTLILGFVNGMDLAIQDNVTLYSGGHV  
LISGYTASWSGRLQNRFAADDNVAKTVGSTNSDIRTVSPIAQSRAVTVVFGTREIQLTLRGV  
DWAKDQLYHDSLILAKGDWKLENSRTMLMSAQTADRFGLSVGDQVVVRLNTASGQQNVT  
DYKVAAYDDGAAGGMNMAFVAFGDLTADLNMKSNEQQQIAVFLKNSTDAEKAAQTITGE  
LSSKGFTVSRGSASNTGSSNAAPSPDSSTNADSFVSSITGTGQDASRHLSPGTTLYYVST  
IQELAGEIGSALGSIRWIGYAVFILMLIVSATGISNSYRMVLLERTKEIGMLRCIGYKKK  
DVSSFIWEGILLAGGAALVGVLALPIGFGIGFIPFNPHGDFGAALVQGHRLFAPTL SQ

LLLILVFTIVAIAAVFLPARKAAEVVPVEALRKTA\*

>SPBDM4\_v1\_40151|ID:27157456| putative ABC-type transport system, involved in lipoprotein release, permease component [Uncultured spirochete bdmA 4]

MIAARLAWANLGLHRRKSLIGMIMGLGILILFLGNSLIDTALSGLQRMFVQGYTGDLMV  
TGPTEFSTTVLGETAGSEEVLPHIAQIKKYEDFLASRKDVASTLPLLSGQASFGIGEAE  
GSGYCFGVNVDDYRDFFPDNVTLMNGEWPAENDGPVLLSEPTLALLNKSASSPVYPGK  
IIMTALANSAGTVIREVTVKGVKFNQSNQQLSGITLVDADTMRDLLGFASLRDGAPVLS  
GQEAASFVTSFDPDSLFDNLFAGSGGTAANAAATGSASAAEASGQGAASSAQTRVQAEVV  
PAWQFLLVRVKPGASSRLLSDLSAFSKQIDDGDRVQDWIAGAGKVARTAVTIRLAFDLL  
VAVVAVVVMIMMNVLVISVNERLYEIGTLRAIGAKWRVVRNMILYETTFLALIAGAAGL  
LIGLVLLVLGKVGIRAPNLFFFEALFGGQVLKPMVSGGAAIRAFWLILAMGLGASWYPTI  
VALRIEPPVAMRGD\*

>SPBDM4\_v1\_40152|ID:27157457|yknY| Uncharacterized ABC transporter ATP-binding protein YknY [Uncultured spirochete bdmA 4]

MSDIIISLDKVKVYFLDTVEVEAFKDISLDIHAGDFVSIAGPSGSGKTTILNLIGCVDK  
PTSGTVIVH GKRTSDLNDDSLTEL RHKSIGFIFQTFNLIPVLNIRENVELPLLLDSQSGS  
GRKADRKEWVDFLIENVGLKDRMLHKAELSGGQRQVAIARALVMKPAIVLADEPTANL  
DSATGESILRLMRHMNETFGTTFIFSTHDPDIVEEADHIIRLRDGRIVEDRRRNGTSVDF  
AAPGADEPVGATGTEGGQS\*

>SPBDM4\_v1\_40153|ID:27157458| conserved protein of unknown function [Uncultured spirochete bdmA 4]

MAYSGLQEFISFLESRGELTRISTEVDPIEITEIADRVMKEGGPALLFEHVRSQWPLL  
INAYGSEKRMAWSLGAESLDNKANEIESLIGWAWVSQVRDFSLFSALPEALPKLPVARSFM  
PKKVRRAPCREVADEGGFDSLPIQWPDGGRFLTLPVVCTVEPETKAQNWGMYRMQVY  
DDRSAGMHWHIHKDGAHFFQKYRVRGHRMPVVVALGGDPAITYASTAPLEGIWEAMFAG  
FLRGKPAEVIEIGDTGILAPADAFILEGYVDPEELRLEGPFGDHTGFYSLPDDYPVFHL  
ERMTRRKNPVYPATIVGIPKEDCFLAKATERLFLPLLKQLCPEITDINMPLEGVFNHNCI  
LVSIRKRYPGQARKVMHFLWGMGQLMYTKMIVVDDDISVQDLSKTAWRVFNNIDAARDL  
VFSEGPLDALDHSSPTPRFGTRLGVDA TRKWPEEGHEREWPDPLSMRLDIVERVNSRWGE  
YGIGRP\*

>SPBDM4\_v1\_40154|ID:27157459| putative 4-hydroxybenzoate polyprenyltransferase [Uncultured spirochete bdmA 4]

MASAAPESDSRQDLKAGTHRKPSPGKHVRDLFRRLGTIGDSVMISHTLFSLPFVISAAILL  
ETNGHPPFWKLFWIVVA AFGARNAANALNRIIDKDIDAKNPRTAGRHLPSGRLSRDLWL  
FTVAMLVLLVLGAAMLNPLCVMLLPVAGLLLFGYSYTKRFTWLSHYWLGIACSAATMGAF  
LGISGTFQLRYFPLTAGVALWVAGFDIYALQDIEFDRKEHLHSV PARFGETGGRIFAAL  
SHAGAFLGFISIYYFWETPDIFTGIALALCFLLLVAEHLISARKSESRIKLAAYTLNQII  
PIIYLCGVALDIYVR\*

>SPBDM4\_v1\_40155|ID:27157460| putative aromatic acid decarboxylase [Uncultured spirochete bdmA 4]

MPIRYLVCITGASGGVYAVRLMSALARGVILHVVA SEWGARVLL EETGRPLGYWLGKLR  
TQGGPDGGPALITLHDNSDFSAPVASGSFRLCGTVIAPCSMGTLGAISSGICSNLIHRAG  
AVALKEGWPFIVVPRETPLSLVSIRAMSQLKEAGAVILPASPSFYGKPKDIESLVDTVY  
RILDHLGIVDKNVFRWSREES\*

>SPBDM4\_v1\_40156|ID:27157461| Nlpa lipoprotein [Uncultured spirochete bdmA 4]

MKIFSVLLIAIAALVQPYAQSATQQALAAPLSIGIFADADSLPLIVAANEGLFQREGVAI  
NLVRFSSAVERDSALQAGKIDGAVTDVLA VVLANQGGFPLKITSLTNGRYGVAVSPKSNI  
QSMKELEGKNVAVSLNTIIHYFADWSATQAGLGAGALNLVPVPKMPVRLEMLLSDQIAAA  
VMPEPFLTTAKLRGAKILVSSDDSGLEAGVLAFFPAVIAKNAGAIQRFYRAYWEAAQRIN  
ARPDQYRSMVLVDSLFPPEEAARVFLFPKYVAPRLPSQASIDNAVQWLLSKGLIKASPKHA  
DLVDASMVSGW\*

>SPBDM4\_v1\_40157|ID:27157462| taurine transporter subunit ; ATP-binding component of ABC superfamily (modular protein) [Uncultured spirochete bdmA 4]

MVTLEDISFSYTAHGVPVPVFEHFSATFEEGRITAVIGPSGCGKTTLLRLIAGLLSPQSG  
NILMQRPRIGFIFQDFGLLPWLTVERNAGLGLALGIPADERRRRVSDILEELGLSKWRK  
AYPVRLSGMQQRVAVARALAI DAGLILMDEPFSSLDALTRESVQDMLRAIQRTHQTII



LVTHSIEEA VYLADTILILDGSMVPKDFMPVQNPWRHEHTPNHPGEQAATFSSQGQRSSE  
LSSSNPRENAAYLSAVGRLRHAFDEAVAQKAGVATAGQSPAGPSATNPAGRSPASVATL  
EKAPKGVSGIISTLSPSVSKFLIKTAQIVAAAIFVCVWWAAAALLKRPFLPSPWLAF  
FSENLHKGIFQIHVLASARRVFLALLVAGPLAWMLGLLAGRVRFFDNFFAPLIYFFHPLP  
KVAFLPILMLFLGLGDASKVALMALVIFGQLFVTGRDAAKSIAPALLDSVKILGFSRFSI  
IRLAIVPSTTPSLMSALRVSLGTAIAVFLSETFASIDGLGWYIMDAWSRVDYPMYAAI  
LALSFLGLILYLIIDAIEAYLLRWRQNN\*

>SPBDM4\_v1\_40158|ID:27157463|fbpC| Fe(3+) ions import ATP-binding protein FbpC [Uncultured spirochete bdmA 4]

MKGNDMAAKSVPVMLSVDTKIFRDPKTKAEVHAVENANFDVKPGELVTLLGSPGCGKTTT  
LRMIGGFELPTRGKILIGSDVTFPPNVRQTATVFQSYGLFPHMDVFDNVAYGLKIRKL  
SQDEIKNRVNAVLDL VGLSELAHRAPGRLSGGQQQRVALARSLVVEPQVLLLEPLSNLD  
ALLREQMRVEIRRIQKSLGITAIYVTHDRIEAMSLSDRVIVMRDGRIQQVGTGDIYEYP  
VSMFVAGFVGKVAFFPARLEGIEDDGRALCTVGGKRKVRAGSVAGNLGAGARAVVMARPE  
SLRLVGREDAIATGMVTARVYLGSSEIYVKTEAGEILVQIDDPGKILPSEGETVWIGF  
DEKLVRALPAD\*

>SPBDM4\_v1\_40159|ID:27157464| ABC-type Fe<sup>3+</sup> transport system, permease component [Uncultured spirochete bdmA 4]

VFTKKKLIMFAVVCAIFAVGEFWIFSTLQNTFEKNSIKEMTSLIKAMTSSAPQNDLHAH  
WSEELSAIYPDNRFFVIKGVPGEEGSENIGGDSALFDIWKLPANATIAENAAESVSYLEV  
FRWPAKVSFLGVPYTLMVAPVPDEEDSSARATLLVAIDASGYVAFGKLVQSLAVVAFLLF  
SLGFGIATFSRDPISGYAILVLAIVIAFVAYPLIEAVRLTLVKEGRFSFDVWKTILSNR  
QYLQALWGSIQLGIVTATLSTFIGFMYAFAVARTSMRGKRLVTGLATMPVISPPFSLTSL  
IILLFGKNGIITKQLLGLQNFNIYGLGGLALVQTISMFPPIAFLTMQGVLAIDSTLEDAS  
LDLNASRWHTFAHVTLPLAAPGLLSSWLLVFTNSLADFANPLLSGSYRVLSVESYIEVT  
GMGRLNNGAALSLLLLLPTLTAFLVQRLWVSKKSFVVVTGKPSTRLSDLASPGARRALTG  
FVAVVSGFIVALYATIVAGCFVKNWGIDYTFTLANIGEALARGKQALLSTITLAGIATPI  
AGILSMVA AFILVRKKFLGKRILESLIMTPFAIPGTLLGISFILAFNKPPLLVGTGAIL  
VINYVIRELPVGVVEGVAALRQIDPSIEEAASDLGADQATIFRTIILPLIRPAFISSMSY  
TFVRSMTAVSAIIFLISARWYHITIQIYNFSENLRFGLASVLSTMLIIIVLAVFGLMRL  
VRQSEFLEKTVTTQ\*

>SPBDM4\_v1\_40160|ID:27157465| Extracellular solute-binding protein family 1 [Uncultured spirochete bdmA 4]

MKRVLIVGFVLLLVGTMAFGQQKVGAYTTLEEPLAKELFDEFQKETGIVVNWQRLSGGEV  
ESRLEAEKANPQASIWVGGVGLNHISAKLKGLTTPYKSKMLANTPLQFRDPENYWVGLYI  
GPLCFVTNNKVAKEQGLVPPTSWADLLKPVYKKGKIRMANPTTSGTAYNTLTTLRYVFGGD  
ENKVFYDLKLDKNIDQYTKSGSAPGKSVGIGEIPVAIGYAHDNVKKLVEGADITITFPS  
EGTGYEIASMSMVKGGPDPVNGKLYDWILSPKAQEIIAKWYVIPLSKLAKKNPSAFSIS  
EIKTVDQDVMWDAANKERLLERWVKEIGSKR\*

>SPBDM4\_v1\_40161|ID:27157466| protein of unknown function [Uncultured spirochete bdmA 4]

VLSIHFNKINYKFYQNFNFGKLLASYILSAEKGSGRVSWSCEDPNLPHFTTCGGSL\*

>SPBDM4\_v1\_40162|ID:27157467| Heat shock protein Hsp20 [Uncultured spirochete bdmA 4]

MNSLVMYENNPFDLMERFFNDDEWLMPGFRTPEIDVYEEGDKYMLEADLPGLNEKDIKLE  
VRNGQLTFSTLKNEKSEEKSKKDRWIRKERREFQFVRSFTLPEDVDANGIEAHFKNGVLQ  
VVMPPKPEAAPKTIEVKIA\*

>SPBDM4\_v1\_40163|ID:27157468| putative ferredoxin [Uncultured spirochete bdmA 4]

VADKSARLTGNVKGRWYVDSSCIGCGLCSSTAPDTFALGDDGQALVIHQPETADETELAN  
QALNDCPVQSIGNDGE\*

>SPBDM4\_v1\_40164|ID:27157469| Peptidase M29 aminopeptidase II [Uncultured spirochete bdmA 4]

MEDPRLGKLAHLLVNYSTKVKPGDKVLIENVNSEPDFLRLLEEVHAAGGLAFLSLRDRR  
LERTLFMNAPEEQFELQAEFERARMDKMNVYIGFTSMRNSFAWQDLPQEKTELYNRHIWK  
KVHIERRITNTRWVRLRYPTAAMAQNAAGMSEDAFEEFYFDVCTMDYAKMSRAMDALVTFL  
EKSDKVRVKAPGTDLEFSIAGMPAIKCDGTMNIPDGEVYTAPLRESVNGVLSYNTPSEKD  
GFKFENIVFEFEKGVKIVDAKANDTSRINKILDIDGGARYLGEFSFGLNPYITKPMLETLF  
DEKIAGSLHITPGNSYDDCDNGNHSALHWDIVLMQDADSGGGEVWIDGKLIKDGIFVAP

ELLALNPDALKD\*

>SPBDM4\_v1\_40165|ID:27157470| conserved exported protein of unknown function [Uncultured spirochete bdmA 4]

MKNRSKEYVKATFLWVFGIFVFFAILVASPFILWIAQPYRQLDVWVVDKTVPYPDFRE  
HAGLFWLLNNEKISKPGTKVLVDVRTDYGFYPTSKEEWSTIPMPHTAKKPDLIYIADTY  
GVYRDDYMQKKLPNAFSSLIYGGLNDDYSTIQQAMGGGNTLIAEFNTAASPTNDRDRAL  
FGRILGLKWQGWIGNYYESLAKDGGVPDWVVGWESERKQTWEYSGRGIVLLDEEGSVEV  
LTEKDDIGKNGMKMIFRQEWAKTLGIKKPTSRYWFEWVIADPLVEEIAHYDLVDVTPSGK  
KKLDALGLPNTFPAIVRFKNDQFTSWYFAGDFADLQFSGTTYRMKGIQTIKRILADDTVD  
NNSYFFWKVYAPLMHHILADIEQRRVETRATTKPAETQVRVRAVKEGIQLKSSTGEWRTV  
FLRSVNMGPAEPGKFFTEFPYDNDTYVRWLNIGSLGANTVRVYTLLPPEFYRALKIYNQ  
THPDAPLFLQEIWPEENPPGGDYLRPAHQEEYLKEINYVIDAVYGRANVPQRKGRAGWV  
YSVDVSKWLIGWLVGRELESVEVMQTDADHTGATYTGEYVSAGKGASPTVEWLAESLDA  
AMAEAEYGVLPVGVISWPTLDPHEDTEWDPKTGKSNRWDRASVAIEHLDVTEKMTA  
GLFGAYHIYPNYPDFIVNEPSYGDYRDAVGILRYGGYLEEFIKTHSRYPVAIEFGMANG  
AGVAHISSDGLNHGGVDEKTAGRDIMRMYAAIQKTEYSGASIFEFMDEWAKKTWITEPFM  
IPFDRRVLWHNIVDPEQNYGLIANETVPPSAPEQKISGGVLSGLEVSHDASYLYLTLQL  
TGPKTPQEYEILLGIDTYDRTLGQMHWPGNLEKTASGLEFLLDIQQNEARLLVIPSYNIA  
SARYATTLRRDGAFFEEIQFLVNGKVTTKTGS DIPERRFNASLMRQGPDESGLWNIEGN  
LIHVRIPWNRLNVTDPSSRNVLNDARNIGDPGTDVLKTIITDGFVFDARVLNAKTGTEAG  
RLNANTDSPYTWPGWEEAPPYRERIKKSYGIVRDTWKREAEKEKAIADFFGIQSVR\*

>SPBDM4\_v1\_40166|ID:27157471| Glycosyl transferase [Uncultured spirochete bdmA 4]

MTIPSEYLLGAVILFLWLTIYVVVSTLLNKARVTINLENLKS DLREL PQIFAPTYEQNPR  
KMRTLLVHILYLTQNIKMSLVQKQRIFNVTAVQYFERTQIHRVASRNRFRMSAARYLSS  
INTDNARKAIEKALLKEKHFP TKLYLANALSDIKDPRSLYVLIQS LYGSHYWRNKVNML  
IASYGDIVRESIQGYFWRTDIEIRELLVDLAGSIPAEELKGYLVDVLQLGLGEVGLKRL  
TANLPAKCCYYCVHGRMEADDTHRQCPYKGVANNFRCKRYHTLVTSLSTALNYHRLMVR  
AAETLEKYYPEELASDYYLEHVDKDIQSI A VRSLGQTLRTGNLRKLIDYLERDETA AAAAR  
EGLRNLNHHPKFILTLVEAFQNSEGALHNRLAEVLSNRIEYIITKLLGHEHDVAAGIIN  
ELISMERVSEIIEFLKRKNVELEDRLVEVIQPR LQDCELLAKECGLFLPDSILEKLGLK  
RLFPARKREEKVDKLVRRLYVVLAFALGFFPLLYVLRYYDRLDTMPFIQHLKYFVLNF  
NVNFSYYTIAVNVVYLILFFSRLNIKRAAQLWELKSMTMLFKPRMLPSVSIIAPAYNEE  
TTIIESANLLSLKYPDYELIIVNDGSKDNTLRTLIDHFDLMKTD FSYKERLKHYPIRGI  
YTSPSIPGLIVVDKENG GKADTLNAGINVASKEYFCGIDADS LLEPDALLKIASLTLDYG  
VETPALGGNVFPINGCKVDK GKIEKIGVPKHWLSRLQMVEYIRAFMCGRLGWDYINSLLI  
ISGAFGLFRKERVVA VGGYLTSSGKYQKDTVGEDMELVVRIARHMHESKHSYRISYAFNA  
NCWTEVPETMSSLQQRNRWQRGLIDIMYFHRKLIFNPWYKLMGMVSMPPY LIFEMIGPL  
FEVQGYLMVAIAALLGMLSTR LALLFFASVLMGILISVTSVKIAEKLNVYFNYKDTLKL  
VGTAIENFGPRQLFSTWRVIGFVRAMQK PQGWQKFERKGFADNRQERGDAPRGAHR\*

>SPBDM4\_v1\_40167|ID:27157472| protein of unknown function [Uncultured spirochete bdmA 4]

MENIQDPIDLGGGFFRIGASRL LGELQSNYLLDDGEAILFGPGA AVNLP ELKENIQKC  
ASLRPISAIVVHQEPSSSSALTYLEKEGSRAAITHWRTWGQLRFYGLSSQPYIIDEHA  
WSLRLSSGRVLQFLPTPYLYQPGAFATYDRVTKTLLTGALLSSYSENLSIYADDGQFLDR  
LKAFHRANMPSREFLAPVMQILAKWDIERVMPSYGP IISGQVVKRIFSELAELEC GELARS  
EGVEALYAGMEQFGATGAEVARLKQEIETLRRLNEELNHSITVSKDRAIRDAVTGLYSEI  
FYKSFVDEEIAIRITEAGPEDHVLAVFGIDENIAQIEYKYGSREVEALLHGVARVIEENL  
PKTAMAFRLHGATMAAWIPAILFDRAIELFDKIRYQIETSKAFVEPVTVS VGVATLAEAA  
STQPAL EKIAADMTDLGIRRLRLARRLGGNTLYFGSTEENE GEVKARILIVDDDEVNVDV  
LKYLINEGYSILTAADGQEALSILGKEIDL VITELMVPKIDAYILKESMLSKSATKDI  
PVVISHLKTTEL TIRRAYRLDIVHYLQKPIILEELLGIVQNLTHVGS GA\*

>SPBDM4\_v1\_40168|ID:27157473| Carbon starvation protein CstA [Uncultured spirochete bdmA 4]

MSTLIVLIALVIYFGSYFLYGR TIRDKVLKSKEAPEAPSKRLSDGVDYVPTSKYV LFGHH  
FASIAGAGPITGPAMAVAWGWLPGLLWIWLG NIFIGSIHDY LALTASVRYDGRSVQFVAQ  
DLIGKRAGKAFS WFILFLCILVVA AFGDIVAGQFAADGRV FSTFFFCVAAIITGYFMYH  
TKLGIGGSGSIIGIVLLLLAFWIGDLLPIAASKDVWFLVIFVYIVIASALPVN FLLQPRDY

LNSFLLYFGLIVGGLAAIIAVKGFDSLPAATTSFSAVVIGGKPTPFWPAVPLVIACGALSG  
FHALVASGTSSKQLREEKDALFVGYGAMLTEGFLSTIVVVSIAAFGIAAMGEGNVLKTPA  
LNRVLSYGTMVNTAMPFFSFSFMKLF AA VVWVSSFALTTLDTTNRLGRYLVQEMITPVKE  
KKPGLYKTFNNRWVASLIIAFFGVGLAWTGNVYTVLWPAFSGANQLIASIVMLTVAVWVKK  
KLNPSYTMVVLPAILLWVTVTAGIHWYIEIAIVPTFFAAAANAAAQTKNITGVVVGAIN  
IFMLVLNFIMISAFMKNWKTQAD\*

>SPBDM4\_v1\_40169|ID:27157474| conserved protein of unknown function [Uncultured spirochete bdmA 4]  
MNEKMKLLHLLRRGAKTLVQVQREKATSMLEDFELKELENIFALLLLGGFVGISSPPSIA  
IELLPYLERELVVMFARTDMSVDPIGSLVGMLEID\*

>SPBDM4\_v1\_40170|ID:27157475| Arsenite-transporting ATPase [Uncultured spirochete bdmA 4]  
MVSPVSHKTAFFLGGKGGVGGKTTLSASFALTLARSGQKVLVASLDPAHNLGDALGSALKNE  
PLTVEPNLDAMEIDLETWINTYLEESRSQLKSTYSYNVTLNLDLDFKILKYSPTGTEEYAV  
LWAIEDIHCRLSPLYDIVVLDTPPTALSRLFSMPTISGLWVKELSKLRETILEKRSTLV  
RLNPESPVKESCLDKDDDKVYGKLSTIRQRLSMLEHLFQKESFINVIVNPDELSVTEALR  
IKDELDRLEIPISTICLNKKGVLNNEWHIHQSLAAIPMFSFDFESSGIRTRDQLIQLGTQ  
HLVDTFLDKRSIPA\*

>SPBDM4\_v1\_40171|ID:27157476| conserved protein of unknown function [Uncultured spirochete bdmA 4]  
MNMNPFLLTGLVALGVGATITYYLGKKNRWLGKHLAQTEELAPTDTNYVNIIGGAIGY  
NFSYKLGDWKEAKGTFTFIPRHSLLYMPISFLIRGGDFYLNLFDRRLPGEHLLILAS  
HLRKAIDDIEAMSRKEVELGGKFFVLLWRENRIKLERIALSFPDPQSLMHFCCYADN  
KTLFLHLAPKKGIIIDNLSYFVKNAQVFLEK\*

>SPBDM4\_v1\_40172|ID:27157477| conserved protein of unknown function [Uncultured spirochete bdmA 4]  
MDPEMQKKIDETVQVKEPQSDVPIVDLGLVEKVITYSAKEKILLIHLAIGTPRWQCPACS  
AINGVVKEGIVRRAKEAFEKAFPELSIIVE\*

>SPBDM4\_v1\_40173|ID:27157478| putative Response regulator receiver modulated diguanylate cyclase [Uncultured spirochete bdmA 4]

MSNIRILMVEDSISQAMHLRYVLEAEGFGIDVASNGIDALSFLEHNTPDLIISDTMMPTM  
NGYELCKKIRENPRLKEIPLMLVTALSDPTDLIRALEAGADNLITKPYNEQALISRIRYI  
LVNAEIRSQSGSETGIEVFFAGKKYSINSTRIQMIDFLLSMYESATQKNQELLSNNKLLK  
EALDNIITLQRNYRQLETDQDAIFVYDKDKVIRYANPAHSLFSREGKGLIGAHLPIDE  
DISSQKEIEMKDPYGNATAFLDVRVSSDWDGEMMTPSVFRNITEATQLRKELEQMSLTD  
LTGIYNRRGFKLLSERMVKLARLQSQMFILFADMDGLKSINDTLGYLEGDRAIHTMAIF  
FKNAFRESDLVARMGGDEFVVMGLINENFIPSRLIDRMNELVQGFNAKGESRFKLSLSMG  
IENIPYDSQAPIEEFLNSADAKMREEKQKQKKKFFNNS\*

>SPBDM4\_v1\_40174|ID:27157479| conserved protein of unknown function [Uncultured spirochete bdmA 4]  
MKRFVLFGLAVLLVAGCELPNITWEDIKGEWDFPDTTFNDSTIKSIHLSLMDPGEGES  
EYRIDLSWENGDNVLLHYGEGSMDKNVFSGTYNLGGDYTDSTTYSVTVTFTLNDQLKAV  
FTGTGPLNGLVLEHGTLNAG\*

>SPBDM4\_v1\_40175|ID:27157480| AMP-dependent synthetase and ligase [Uncultured spirochete bdmA 4]  
MITLKDYTLAEVPQLSGARFGLRPAALSMVGGAVYTYRDFERISRGVAESLIADGVKKGDR  
IALLAENSPHWVMTYFGILRAGAI VVPILTDFIPVQICNIIQHADARIVFTSEKLRKLS  
ELPKETAIREIKQS YVPSPPAALPAVAADDLAMI VYTS GTTGLSKGVMLTHRNL SNAT  
ACKSIITLYRTDRLLSILPLAHTYEFTIGTVIALLSGSHIHYLDRPPSATVLIPALQAVR  
PTIMLSVPLVIEKIYRSSIKPTLDGMKLYKNKFFRPLILLFAGMKLKKTFGGRRIRFFGVG  
GAPLAADVEEFLKKAHPYAIGYGLTETAPLLAGCSPRSTFLRSTGPALKGVDLRIAEP  
PDTGEGEIQAKGPNIFKGYWRDEARTREAFSSDGWFRTGDLGYLDKKSRLFIRGRKKTMI  
LGASGENIYPEEIESIINQAPEVAESLVEDEEGLTALVYLKSELENLEARLQDSIDAA  
GDLGSRVQAIVNVEKSMAGTVNHAVVDAEKALERLLENIRKEANSKLA AFSRIQHVKIH  
REPFEKTPTQKIKRFLYGKKAEGAR\*

>SPBDM4\_v1\_40176|ID:27157481| putative signal transduction protein with CBS domains [Uncultured spirochete bdmA 4]

MKTVGDILKTKGHEAASVAPQEKVLKALEIMA EKNIGAVLVM DERGMVHGIFSERDFARK  
IIVKGHSCENENVETVMTRKVIFVQPETSLEECMNLMTVHRIRHLPVLENNKVAGIVSIG  
DVVKALLEVKDRIISEQAFELGQTERARQPGAV\*

>SPBDM4\_v1\_40177|ID:27157482| putative universal stress protein family [Uncultured spirochete bdmA 4]  
MKKILETVLVAINGSDASICAFKYALALKKAFGRSIVACYVVDATIRQLALSRIFFVPEE  
SEYERNLENSGQRYLNFCTDLARQKQLAIETCVRKGSVSGEIVKYSIELNADAILGGA  
PADALYRDAIADSNHEVLKNARCPVLFVKPPLGEEFYKSM\*

>SPBDM4\_v1\_40178|ID:27157483|atpD| V-type ATP synthase subunit D 2 [Uncultured spirochete bdmA 4]  
MAEPMPAPTNTLIKEKRNQLALQGYDLLEKKREILVIELMKRMDALELLEQEIAKMTD  
DAYAALRKMLLSVGRERALSISLPRVDITLSASYINVSGMHLPTLDVRASAPVLHYSFM  
NSFAVCDETVEFTELLDKLSTAAGMRSIVWRLAREVRKTQRRVNALDKMVIPRSREIVK  
FIDSSLDERERESLFAVKMLKQRLSEQD\*

>SPBDM4\_v1\_40179|ID:27157484|atpB| V-type ATP synthase beta chain 2 [Uncultured spirochete bdmA 4]  
MRGLEYHGHILRADGPVIAEHRENVGFSELVSLRDRTGEDRLGKVVDISEQAIIVQLFSE  
NTGISIDGSWIEYLEKPLTFRVGDGIVGRIFNGLGEPIDGYPPIMSSDLRDINGSPINPS  
ARVYPRDFIQGTGISAIDGMNTLIRGQKLPIFSGNGLPHNRLAAQIVRQAKVLSGESQFAI  
VFAGMGIKYDVARFFIDSFEKSGVLARVVMFLSLADSPSIELRVTPRTALTAAYLAYEK  
NMHVLVVMTDMTNYCEALREVSAARNEVPSRKGYPGYLYSDLASLYERAGKIEGCEGSIT  
QLPILSMPNDDISHPIPDLTGYITEGQIVLERDLSQRGIYPPIAGLPSLSRLMKDGIGEG  
MTREDHRDLAAQLFSAYAYVRSVRDLAAIIGEEELSDRDKVFLGFGDRFEREFLAQGEFE  
NRSIEQTLDLGWKMLSILPESELVRIPPKLIEKYLPRAAEPEAKE\*

>SPBDM4\_v1\_40180|ID:27157485|atpA| V-type ATP synthase alpha chain 2 [Uncultured spirochete bdmA 4]  
MSAGSITRISGPVIYAQGLEDAGLYDVVKVKGAGLIGEIILKKGDLATIQUIYEDNTLMRV  
SEPVECLHRPLSVALGPGLIGSIYDGIQRPLPVLKSLSGAFLAPGLAGEPLDTQKKWHFV  
PAIKEGDPIAPGTAFGIKETDSIVHRLIFDSLVPACTAATVAPEGDYTISATLVKSSDG  
KEYTAMSYPVVRTPTRFKEKQVTHEPLVTGLRVIDVLFPIAKGGSAAVPGGFGTGKTMTQ  
HAIKWCDADIIVYIGCGERGNEMTEVLTEFPTLIDPRTGRSLMERTVLIANTSNNMPVAA  
REVSIIYTGITIAEYRDMGYHVAVMADSTSRWAEALRELSGRLEEMPAEEGFPAYLPTL  
AEFYERGGMVTTLSEKKGSVTIIGAVSPPGGDFSEPVTQHTKRFVRCFWALDRDLANARH  
YPAISWNSYSYTEDLIA YWDAIDPAWDSLRSKTMEILKKERRLADIVRLIGPDALPDE  
QRLILLTADMIAKAGFLQQSSFDKVDMYCAPPKQTLTLLTCILTFHELAENAIKSGSPLLKI  
SALPIREKLIRLKSLENEKVQEGQAVIQEIRTA FARLGA AQGAVSA\*

>SPBDM4\_v1\_40181|ID:27157486| conserved protein of unknown function [Uncultured spirochete bdmA 4]  
MEEIRGTEALEQEILDDARKRADRIIRKADDDAKIMQAQTDQKIKEAVDALTQEYQARQE  
TAEREARSRLPLEKMRLEIEYRDAMLKALQEALAAAMPDFLGAWCVRQLRRGAELIRSS  
QAKIMVHGLDTSTMQEIRELFSGASSVSIEEVPSMKVRGLSVEPADNSYHISITEHELVA  
WLLDEKRGELGAALFGSNAHVEKSATPDRAEPPAQEGSTL\*

>SPBDM4\_v1\_40182|ID:27157487| putative Vacuolar H<sup>+</sup>-transporting two-sector ATPase F subunit [Uncultured spirochete bdmA 4]  
VAEIFALAEIIIIGFGMIGIKGKAVTGREDAIATFRSIVQNKCTIDGGTVELSDCKML  
ILSEDVSDMIGEELSEWQLSGAFPLVVEIPPLSGSSAQHTRIVDAVRQAIGIKIQ\*

>SPBDM4\_v1\_40183|ID:27157488| ATP synthase subunit C [Uncultured spirochete bdmA 4]  
MKKKLLVGIMTFVSSAAAFQQTQSAVATVSASGQVAKYLGAAIAVGAAALGGGYAVAKIG  
AAAVGAMAEPKPELSGKALPYVGLAEGICLWGFLVAVLILFR\*

>SPBDM4\_v1\_40184|ID:27157489| V-type ATPase 116 kDa subunit [Uncultured spirochete bdmA 4]  
MSTVSMRRVELLFFKSDIDAVLKYLGSQQCFQIYPDELERIAHEKLAGVAEPDQEKALV  
GQLDEAQRKLDFIGTFFGMAAPQNIVEDVHLPDDEMLSKIDILYERCATEKKRFEEQEA  
VDQLAESIHEAKAFAGLSRPFDEFEFKFSYVSIQVGVKVSKEKIDPLVKALGTRAVIVPLDD  
EGTILAASSRKGRFALETLSKVGFEKKSPPAGVQGVPAEASALERAYNAEKLRLLGALL  
NEKKGLAEQYQELWQKMTSSVRLKQSLVVEHKLESTKWVYRLSGWVPADRIGRMNKDLL  
SMLGNRISIRIFDPQEQINKKGGKVSEEVVLLKHNAFVSAFQGIVLSYGTPLYGDTDPT  
PFVAFFFTLFLFSIMFGDLGQGLVIVALGFAILKAKKGLLARYTKYAIAFISAGLGSMMVMG  
LLVGSFFTNDLSILPLERTLTGFFLGTGPKDRFLQIMPQDNITAMFYFFGFTLAVGVIINS  
TGLVINMINLVRKEYGEAIFSKTGLAGSLLFWWAIGIVLRLILGGKLGLIDVPGLGIPL  
LALFLAEPLKAKIDRAQGVPEQELSLSDALIGGAVGLLEVVIYFASNSLSFLRVGAFAL  
AHAVLSFVIFTMGGVVRGSSASGLVFEILYLIIGNAIIIGLEGLIVTIQVIRLQYYEFFS  
KFFTRTGKTFKPVSFPG\*

>SPBDM4\_v1\_40185|ID:27157490| protein of unknown function [Uncultured spirochete bdmA 4]  
MAESLEFAYLYARVCGAFSKMQLGETARGLMQNSGGIMALWRQLFDEEPPSLPEAKLLFE  
AERKIIERSIDAFLRLAKPFSESSDLIHVLISKYEISAIKSMLFRLRSGESKPEEVSYTS  
PVIEQALANWPRIADMFYRTPYSWLDLWLNIAIAENRLDQQYYLDLWNAANKIPARKI  
GAMLDLIRWEIYQNVVWALRVRRYGMTEQDAVGMFVEVKGIDTVSLAIQTFHFDIDKL  
ETFDRWPLKLLSNQTGPGLDVPVMEIRTQEDLFSMVRRLHLHPFSYTPICYFKLLEY  
ETSLLLAVIESVRLGVSPDEKAKYMWIPGGEP\*

>SPBDM4\_v1\_40186|ID:27157491| protein of unknown function [Uncultured spirochete bdmA 4]  
MDSVDSIDRLVEIERQAADIIHDAEEKASRAQLDAKTKAETLQNQKIAEERKKLDADYTV  
FLNTLQKQSQKEIGDYKKSLLTIPLNHSALAEATLKGFLNTEA\*

>SPBDM4\_v1\_40187|ID:27157492|fruA| PTS system fructose-specific EIIABC component [Uncultured spirochete bdmA 4]

MILQNAFKPATIKIGLESEDKDELLEELIDVLAKNYPGGMVFPRESVLKALWAREEKMST  
GIYKGVAVPHATVDGIDSLRGLVGLSKKIEYESLDGNPVYLVFLLVSPPEAEIHLDAL  
KQIALLIQDSLLENLMKAATPEKVYSLIRGFEESIGAM\*

>SPBDM4\_v1\_40188|ID:27157493|uppP| Undecaprenyl-diphosphatase [Uncultured spirochete bdmA 4]

MLIIQSVILGLVQGLAEFIPISSAHLVIIPWLFGWNNPALTSLTFDVALHLGTLAIV  
FFASDWGRLISAWCKSIVQFKIGDDPDRRMAWFIVLACIPGGISGLLLESKISEAFHSDP  
IPQSSMLIMAGAI AALALLWVADK FARHQRNFGQIKARDALYIGVAQAFVIPGVSRSG  
ATITAGLALGLERETAARFSFLSAPIIAGAGLKSLYDLWKQINAGTVAGTEL TIFPIGF  
IVAAVSGFLCIKYLAYLKKHSTAVFVWYRFALAALVLIVALVRG\*

>SPBDM4\_v1\_40189|ID:27157494| conserved exported protein of unknown function [Uncultured spirochete bdmA 4]

MKFCTHNQRKAFSFMLSGLFFIGAVAAQTGNPGYEIMKRANDRPAGNDMTAKVLMKIVSK  
SGTIKTREFMMYQLHQKDGASSTLIQFLQPADVKGTSTLTAESA KGEKSQYIYLP SLKKA  
TRISASDKNKPFMGSDLTYDDFGSRDIEDYTFAMLGEESMAGRACWKVESVPKDKSGGTS  
KIVSLVDKESLLIVKADFYDKSGALYKQMTASQSERISGIWTIVDLEMKNLTTGGATSLR  
FDAVKYDTGLSPSLFSKEALGK\*

>SPBDM4\_v1\_40190|ID:27157495| exported protein of unknown function [Uncultured spirochete bdmA 4]

MNDKLNKNSQTIRNGKSFFSIALMFFIVGAVPLSAQASLSGEVTA FSGIFFQASGTAKAGD  
YFQPSTSLKLAPSYTSGPLTIRAELTGAISLADSGGYDVAMKLGETYATLDIADGLSVTA  
GSKVISWGTALASNPEGFINPIDSLSQLVSENRSDWLLPVM LISGKYIRGPFSIEAVALP  
FFRPNTIPAKSSRWYPASLAALDALNGAFISPALFAVDTTSPDLSLNRENMQGAGRMSLS  
QGAVDFGLSGWYGFTKTPAFDVETTPGIITGVDITASYKRQGAIGADV SATVLDSSVAVM  
EAALYLPEYYLGEETTGLPVALEKNTLVSAFGLDRTFGIGSAGDLYCAMEGNLSWILAYD  
SRLASSANETEIGATLITEYRPSAQDFTIRLVMEPDLTVDTTGQYLARLSMKAKLADS  
YSLTLGTVLFGGTSGTIGQYADNDFAYASITASF\*

>SPBDM4\_v1\_40191|ID:27157496| membrane protein of unknown function [Uncultured spirochete bdmA 4]

MAAFVYRFRYLIVAVFCILTLCAAFFIPNLRFEQDIQALAPNNVSSVGEFRRVNQLFGGA  
DSLAVSAQSKSLFTPEALAEAAANKELQSLPDVSDVVS VFTYVEPANVEDGLSFIPYID  
PDALPSDQASSEALKSRLQGIKTVSGKLLSSDGD TLLYIIQTSPNVSQIRLIDNIKSIIA  
AHPDFAFEMAGTPFIDYQMVNYMRHDVVILIVFGLLA VVLVLLVGFRSLRGVLLPLFTIG  
CSLIMTFGFMGLLHAKITIVALIIPVMLIAICNNYAIHFLTRFYEDVFINGMTDKVEIID  
ASFRSLSKPVWLAFLTTVASFISFVTSPIPRIAEMGLFIAFGITYAFAMTMFFIPALLSI  
LPLPRKHRRYHANEALITSMKKAGGFITRHKTAILVVTLVIAAVGAFFIPHIIVDSEMA  
NYFNPNPVRV GIDFINKKVSGSQLIKVSLPVDPR TSEGLKKANEFQEYAESLGQVGSVF  
SIVDSIKSLNRV FHDDDPAFDVVPDNDETA AQLLLL VETSLSPERLTQLVSEDYQNLCFN  
IQLKAGDSATLQKTADLLRTKANEIVGTGGVSMAGVSLIANQLNGLVIISMLKSFVIAFT  
LVFVFAFGFKNIPAGLACAGIMIAIVTVVFGTMGLAKIELSTATTLVASITLGVGIDYL  
IHFSARWFSERNNGYDKKEATSRALGLTGRGIINAMAIIFA VIPPFFSQFRPIMYFGIL  
CFVSILLSLVCGLVTMPALLSIIPDKYFKKIKI\*

>SPBDM4\_v1\_40192|ID:27157497| putative Transcriptional regulator, TetR family [Uncultured spirochete bdmA 4]

MHSKASGDGSASMGNEVRTRIVDL SKDLFFTRGFTRVTMDDLASACGISKKTL YVNFPSK  
DALIHQIICQTQEDLIDQVSRILNDSNIPVVKRLKDVISA VSLHSLQFAPLFLEDVKRFQ  
PKGWKDLQDYKRTSIADAIHLVIHDGQEQQYIRKPLPEDFIVYVCFTLIDNVLT PATMFE

LSMSFHDTFENVMSLLFEGFLTDAGRKAIYAIE\*

>SPBDM4\_v1\_40193|ID:27157498| Radical SAM domain protein [Uncultured spirochete bdmA 4]  
MESVMKPPEKDELA VKRADSI AFNKL I HVSPKTIDK LFDK PALRKTVA KIFEWSTYRSSL  
SFKEYPKQVQLDKFYITRAFIKSIDAALANARQSPVFRKSFVNNVAPAMFGAIEKTNERR  
EAFKQHYGFGPPAFLVVSPTKFCNLHCTGCYANSDAASHEKLSFEVVDRIIQEKTEKWGS  
IFTVISGGEPLLYQSESKTIFDLARRHQDN YFLMYTNGTLIDAAMARKLA EVGNITPAIS  
VEGYEAETDARRGKGVYK KILS AMEHLRAEGV PFGVSLTATKENAHLIPSRELVEFYTKL  
GALYFWIFQLMPIGRGSMELVPTAEQRFEMYNRMFKLIKDDSYFIADFWNGGTL SNGCIS  
AGRMRGGGYLYIDWSGHVTPCVFN PYAAGNINEIYARDGELSEVLVSPYFESLQEWQKDY  
SMSGDAYTGNWVLP CPMRDHYADILSILEKTHPEPTDEVAEALSDPKYHEAMVQYDEEL  
ETIFGPMWKEKYLKQK\*

>SPBDM4\_v1\_40194|ID:27157499|palH| Alpha-glucosidase [Uncultured spirochete bdmA 4]  
MKLV LIGAGSAQFGFGTLGDIFSSAALRGSHIALVDINGESLGRVLA AAKTFIGAHGLDF  
SLSAHTDRREALKGAD FV IISIEVGNRFELWDQDWMIP LQYGIPQVYGENGGAGGLFHAL  
RIIPAILDICVDCTELCPDATIFNFSNPMTAITTTVLRKFPQLKFIGLCHEIASLERYLP  
LMLGLPFEQLTLRAAGLNHFSVLVSAQYRDRGTDAYPDILAKAPAFFEKVLGYSDILEYI  
QTTGNIPRTEGETGMPDIGRTISSRQWSDRRLFRQILERFHLLPITSDSHIGEYIPWARE  
VADHKGILDFYTLYRASLSMLEPTIELKVKERVIP IIEGMLENSGYEEAAVNIMNAGLIP  
SLPESVAVEVPARVFRRGVEGIAFPDY PKGFAALLRNYAGVYDLTAEAVLHKS KDLVVQA  
LLVNPVVPVCERPELVDVMIGRQAQWLG YLR\*

>SPBDM4\_v1\_40195|ID:27157500| Sel1 repeat protein (fragment) [Uncultured spirochete bdmA 4]  
MKRLFIFLSMLIVALPVVSAQTGQTDLALLTATAESGDAKAQNGLAIRYYNGDGVVQSYE  
QAAIWFEKSARQGNATAQNNLGFMYEEGKGV PQDYARALQWYTMAANQGHAAAQANVAWF  
YENGFQTAQNYDEAFK WYQESAAQGYAYGQYSVGVFYDKGLGVAEDNTQAVQWYTLAAEQ  
GLPEAQYMLGLMYENGDGVAVDFSQAFHWYNEAAEGESPEAMLALGFFYEFGISVDEDIV  
QALAWYMIASDYGNKDAASYVEDLSKDLSEQEIDAARQMADDF\*

>SPBDM4\_v1\_40196|ID:27157501| putative Membrane protein containing DUF6 [Uncultured spirochete bdmA 4]  
VKESPVPRLGWACGMPI LAVLVA AALGASSGLYIKGLAFSSLAMTSLRMTVPLLLVLP SA  
AKHGLLLGKRGMRWQLSLASALNAIRLYLVLA YKLTSMGNAVVL LYLWPVFALVIDSIR  
LKKSLSVVRLGILLLSIAGVLMN LNKRFSLSETDLLGSACMIASALIFAVTNIIFKQVL  
TVISEIDTL YFQNAIGGIIIFL PFLIAEIPHAPLSHL SIGIFYGVA VGLVGFGLFFVGMKR  
LPLFQYSALSYSEVPFAVLLGIAFRGEKMTALQGLGMALIVLGSFLAQRSHSSE\*

>SPBDM4\_v1\_40197|ID:27157502|norM| Na<sup>+</sup>-driven multidrug efflux pump [Uncultured spirochete bdmA 4]  
LKDAQHKTVYTSSSHDTRLEIFRNASIPSAVANFAIPTVISQLVTMVYNLADTFFVGMQ  
GDPRKVA AVSLVLPAYTMLTAIANLFGVGGSSVISRFLGADQPKARQTSTFCIFSAIAA  
TLIFSMLIFIFKGPFLLLGANQDTSEFASNYIVWILVIGGVPTVLGMLFGHLVRSEGGA  
KQASIGMSFGLLNIILDPIFIMVLGLGVRGAAIATMISNCAVVCYFLVYL YRKRKGTII  
SFVPRGFDQELHIAGSVA AVGLPASLQTL SLTSNTVLN NLASGYGSTALAAVGIVKKID  
MLPMNVTLGISQGILPFIGYN YAAKRYNRVRQVNRFRTRIIAVCFSLLCV FVFEIFAERIV  
GLFINDAETIRLGATFLRILCLATPMM AISYLITTMFQATGQ GKRALAISVFRKTTVDVP  
LMFLMNRLVPLYGLLMVQPIVD TLSIGLAFALYRDFSKKLKAKSDTEG\*

>SPBDM4\_v1\_40198|ID:27157503| Auxin Efflux Carrier [Uncultured spirochete bdmA 4]  
MFTALQSVF SVILMIGLGFGLAKARWFEGGASNLISRLV VNVALPAYMISNLMGGYDRPK  
LLSMLPGLPVPFAVMIASYLVAIGVAAVLRVRKDRRGTFQSMFSLSNSVFIGLPVNL LFL  
GDASLPFALLYYIANTTLFWTIGVYGI AVDGA VRNGTQKPSLVSASGLRRILSPPLGFL  
TAVILILLGIKLPK SIMDTCKYLGNM TTPLSMLFVGIVARVEWKKLRF EKDYIAILAGR  
FIVTPVLMVLA VRWLDLPVLMKQVFLMQATMPAMTQTPILAEAYNSDTEYAAIGTSLTTV  
ASMITIPLYMTLINVLIQ\*

>SPBDM4\_v1\_40199|ID:27157504|carA| Carbamoyl-phosphate synthase small chain [Uncultured spirochete bdmA 4]  
MSRKNKSARLVLEDG SVFEGLSIGAEVSVEGEVVFSTGMVGYNQSLTDPSYCGQILVFAY  
PLIGNYGV PALHTNAQGVPLNFESKNIQVSGVIVSEASMEPSHYTAKQSFSEWLT VVGQVP  
GISGIDTRKLIRLLRENGVMKGRILVDGSEEPVRDELKAHAPVKL VSPKDVVRYK GHPDA  
PKIALIDCGVKANILRILLNAGAEVIRLPWDYPLESIEYDGLF LSNPGDPKACTKTIAH  
LRHALSKPHPIFGICLGTQLMALAAGADTFKLYGHRGQNQPAIETESGRCYITSQNHGY

AVHEDSLPPGWEPWFLNGNDGTVEGIRAAGAPFKA VQFHPEGCPGPRDTQFLIDEFLQEA  
RAAKDSI\*

>SPBDM4\_v1\_40200|ID:27157505|carB| carbamoyl-phosphate synthase large subunit [Uncultured spirochete bdmA 4]  
MKSFAAKDPRPTLVHVKPRNIAVKKVLMVLSGLKIGQAGEFDYSGSQALKALREEGIRT  
VLINPNIAATNQTSSEGMADATYFLPLTPEFVTQVIEKERPDGILLSFGGQTALNCGALHK  
AGILYKYAVEVLGTPVEAIELTEDRQLFATHLRSLGLKTPASKAALTLEEAIASHAESIGY  
PVMLRAGFALGGAGSGICRNERQLRARA EKAFVSPQVLIEEWLGGWKEVEYEVVRDSAD  
NCIAVCN MENIDPLGIHTGESIVVAPSQTLTDEEYHSLRSIALRLIRSLGIVGECNIQYA  
LDPHSEEYRIIEVNARLSRSSALASKATGYPLAYVA AKLALGFSLTDLRNRITGVTTACF  
EPALDYCVIKMPRWDL SKFKNVDTRLGSEMKS VGEVMAIGRSFEEALQKAIRMTGISEFG  
LQTDGKREKILPNDLRSALSKPTDKRLFAVYQALAE GWTVQKIGKLTGIDPWFISKIANI  
QNCEAELTGTKPGASGPVRS AKNISLLYKAKRLGFS DAGIAHVLRSEPEIRSWRESVGL  
RPAIKQIDTLAAEYPAQTNLYATYGYAMEHGAHGSPASDVRPSHG SILVIGSGPYRIGS  
SVEFDWCAVSAVETCRKLGRSTIMVNCNPETVSTDYDVC DRLYFEELSFERILDIYDFEE  
PAGILLSMGGQIANNLAKLFDAGVLVLGTSPVNI DRAEDRHKFSSLLDELGIDQPAWEE  
LTPPQEA YAFASKVGYPV LVRPSYVLSGAAMNVA WDSQSLGSFLGLAADISSEY PVVISK  
FIENAKEIEIDA VAKHGKLLYHAMTEHIENAGVHSGDATV VFPQRLYIETVRKILRITE  
KIAAALDITGPFNIQFVAQQNHVMVIECNLRASR SFPFC SKVSRVNMIDLATRILGETV  
QISSNAIYDQPWVG VKAAQFSFSLHGADPVLGVEMASTGEVGCIGSELNDAFMKAMVSV  
GYAPRIKLLLSTGPLEDKLEFVDSARALVEMGCTLYASRGTAQFLK KYGIEVSQLHWPL  
QKAEPNIL TMMHRREFDLVINIPKNRKRRELQNNYLIRRLAVDLNIPLFTNIKTARQYIE  
SLTYAKKNGLEIKAWEEYRKMDV\*

>SPBDM4\_v1\_40201|ID:27157506| Branched-chain amino acid transport [Uncultured spirochete bdmA 4]  
MSYFLLVVVMTAVTFFTRA VPFIFFAKRQPPSLLVFLQKYMPPVVMAILVFASYKDIDY  
GAAPFGVPALIAGAVTALLHFWKRNVL LSIVGGTALYMLLIRL\*

>SPBDM4\_v1\_40202|ID:27157507| Uncharacterized membrane protein jhp\_1251 [Uncultured spirochete bdmA 4]  
MQDNHSRREWRLVLPYAFKASIPVLLGYTTLGI AFGLTLVAAGLPWWLSPIMALCIFAGA  
AQFMAIGLLQSGAGLFEIALLTLLMNGRHA VYGLSLLGPFNRNSGKKWKPYLIFGLTDETY  
GLLTTVKPPAHVDETKFFAAIT ALNQS YWVIGCTVGSIVGSALALDTTGLDFALTALFIV  
LLVEQIRAVRQYEPYLA AAFACVVALFVSPRNFL LVALAIATGVLALLRGKIEQSTKAHQ  
DDGGGDT\*

>SPBDM4\_v1\_40203|ID:27157508| Thiol-disulfide isomerase and thioredoxins [Uncultured spirochete bdmA 4]  
MLYRFLYIFKDMKELGSYDELIRLMQQEKAALFYFSTPDCGVCKSIKPKVISLVQEHFPL  
LKLYYINTEAVPEARQQFSVYSVPVVLVFFQGREYIREARNFGIMELGAKIDRYYSMMFE  
KATQ\*

>SPBDM4\_v1\_40204|ID:27157509| protein of unknown function [Uncultured spirochete bdmA 4]  
MTDPFRSWNRGVFNLYESGGSTTSVGPDWWAMQIRKGR TMASQYIMRHKM\*

>SPBDM4\_v1\_40205|ID:27157510| protein of unknown function [Uncultured spirochete bdmA 4]  
MTAEWEGDWSKVDISNTVLSEFSGSYMMFN GIARLTAGKVRADGGYRFTNFDTAGFSTRI  
ANAETGVLLTIQPLRGISFGTFLPVPVEAQA ASTTYQRMNLGASWDIPEVAIFKASYRME  
PYILYGITPKGKELAVGGQLRAIENFLFTLGYR WFDVADEHDFIDTSYRFPSTLLSAYA  
YLSVQSPLLYKGFKANIEQNIGKTALVAGTSV SWGEGPDVWWLDGWDVNPYLR YDFGGSS  
VQLGVDCTYTTSFAYKVQLTYTIGF\*

>SPBDM4\_v1\_40206|ID:27157511| conserved membrane protein of unknown function [Uncultured spirochete bdmA 4]  
MKSIIIVIMLALCMLVVLSSCLPGDGKNTPERQANFFTGIWHGWIAPISLIIGIFDHNIR  
IYETHNTGWYDFGFYMAVISGFGGLALTRRRRRD\*

>SPBDM4\_v1\_40207|ID:27157512| conserved protein of unknown function [Uncultured spirochete bdmA 4]  
MNEKAYEAVDLYLESLLAGKPEWEQLPDIGLYMDQVTSYLERQLGPFSPSEKERAITSS  
MINNYVKAKIIPRAKSKKYSQEHIALLSVFMLKKALS IQDMGVLLADASSEGSYREFYD  
RFRKALTECAISTAQEIRTGLEPGSAESTARFEASAIDDAKLRTLALKLAVEASLRSLAA  
ERLLALLQTEEPLKAR\*

>SPBDM4\_v1\_40208|ID:27157513| G-D-S-L family lipolytic protein [Uncultured spirochete bdmA 4]  
MYGQEVCLFGDSIARGIILDAQGSYKPIKECFASLAASELGFGLINKARFGCTITKGREI

IEHFLSRVDSETRRLAFLEFGGNDCDFRWDQISADPHAEHLPAATTPERFFRMYSEVIQEL  
KNKGFRPVLMTLPPLDAERYFAWFTRTGLDQKAILGWLGDVQFIYRWHESSYSSAIWEIGE  
THHVPVADIRKAILEERNYSRFLCKDGIHPNAEGHQLIKSEIIFAKEHQADKA\*

>SPBDM4\_v1\_40209|ID:27157514| conserved membrane protein of unknown function [Uncultured spirochete bdmA 4]

MRGEQTSYSPVFLGLTSLFITCLLISNIIASKLMQVGGIVLPSAVILFPVITYILADVTFTE  
VYGFRKTRMVIWIGFAANAFMSMIFLIAIALPHPSFFANQAAAYATVLGSTPRILLASLAG  
YWAGEFSNSIVLSVLKATKGRHLWTRTIGSTIVGEGLDTVLFIGIAFAGTVPAGTLGGM  
MLAQYLFKVSYEVIPTPLTYLVVGFIKRKEHIDTFDSEVVYNPFKLGE\*

>SPBDM4\_v1\_40210|ID:27157515|queF| NADPH-dependent 7-cyano-7-deazaguanine reductase [Uncultured spirochete bdmA 4]

MAEYEFKSLGKTTTRAPSRELETFPTPPSVTKVVLESDEVTSLCPVTGQPDWETVRIEFEP  
GNLCIESKSLKLYLWSFREEGVFCEALAARIAKDVFDAIKPKSVAVSITQKPRGGITISA  
EARLPKIV\*

>SPBDM4\_v1\_40211|ID:27157516| conserved membrane protein of unknown function [Uncultured spirochete bdmA 4]

MLNIILIGLVSFFADMSTEMVYPMIPLYLTSVLGATPALVGVIEGIAESLASILRVFSGY  
VTDKYRKKKPIAFLGYSTVLIYKVALLLAHSWAGILFARVIDRFGKGIPTAPRDVLVSES  
SDPKTLGHSFGIHKALDMGGSVAVGILAAFFIMKTWTGVTYRNLFLISTIPAVVALVMFF  
FIKETNKPRESKAPLNVFKGLKTLNPDCLKLYLTVVFLFNLGNSSNSFLLL RAGNIGFDAA  
SVVLLYFLYNLVSSLLSIPAGKLSDRIGRKRVLVTGYIVYAIYAGFAWAPGKGV LIGAF  
ALYGLYTAMIAGVERAFIAEIAPELKGTMGLHSTIVGIALLPASLIAGELWSAFGPAA  
TFSTGSGLALVAALMLAIGLNKKPERNMLQ\*

>SPBDM4\_v1\_40212|ID:27157517|rluD| Pseudouridine synthase [Uncultured spirochete bdmA 4]

MAREHRNGRASPSGGHWGKIDYLYEDRDIIVVSKPVGLAVIAPEGSRAKTLYDIVTDHMR  
KSNPRARPAVVHRLDRDTSVMMFAKSAMGKKILMSRWNELVRERIYVALVEGTFQGESG  
LFDSWLIENRAGTVYVAEPGVRGALRAITRWRVLKKGNYCLESLETGRKHQIRAQLS  
AAGHPVAGDTRYKARTDPLGRLCLHATALTIEHPFTKQIMRFENPFDEFSLFCRN\*

>SPBDM4\_v1\_40213|ID:27157518| Basic membrane lipoprotein [Uncultured spirochete bdmA 4]

MRDISKLFLLLTIALVAVSGAFAQSTPPAAGPNLTIGLVMVGPYNDHGWSQANYDGLQYV  
LAKVPGTKLVYIDKANSADRPQTTSVLGSLVAQGAQLVIFSSDDMTDEAIKFAQDHPD  
IFVILTSQSQQWKEGKNYLPLPNMINVMGRMEYMKMVAGVAAAMTTKTGKIGFLGPLIND  
ETRRLASSAYLGARYAWVNYLKKDPAKLTFTKVTWIGFWFNIPGVTSDPTQVADDFNSGF  
DVVISGIDTTEAVAEAAKYTAQKQVWAIPYDYSKAIDEGKGVSLGVYPYFNWGPAYVNAV  
KSAMNGTWKNHFEWNGPDWKNINNPDTSAVGFNKGTLKSDASAAVDKDFV GELGKGLNLWV  
GPLNYQDGTVFLKNKEKATDQIQIYLPQLLQGMEGQSVSK\*

>SPBDM4\_v1\_40214|ID:27157519| conserved protein of unknown function [Uncultured spirochete bdmA 4]

MQVELRGITKCFGALRANDNISFTVPPSTIEGILGENGAGKSTLMKILSGFYSPDSGDIL  
LDGEKVKIDTPADAIRQIGMLHQDPLDFPPLKVIDDFILGEKGLLPNRKRASKEFKEL  
SARFDFSIDPESYVDTLTVGERQQLEILRLLWLGARALILDEPTTGISLPQKEKLFATLK  
KLASEGMTILFVSHKLEDVEALCSRATVLRQGKLGTMELPFATKALVEMMFGKEMPQES  
KTQLKMGMNVLNAKHIDLDGVRIQIKGVDLQVHAGEVIGLAGMEGSGQTLFLSACAGLSQ  
PVGGSFCLDEEEKDMTGQTYHEFRKKGVAYLPAARLEQALIPGLSLTEHFILSEGMRGFF  
IDRKAEDLAKSRIALYNIKRPDSTVESLSGGNQQRALLALMRDPLKLLILVEHPTRGLD  
VESTIYIWGKCLKERCANGTAIVFISSDLDEILKYSDRVLVFFAGRVTPLNASSLNVERL  
GRLIGGKDWDMLETEAAHA\*

>SPBDM4\_v1\_40215|ID:27157520| ABC-type uncharacterized transport system, permease component [Uncultured spirochete bdmA 4]

MRDTRTRNRLFQIGAILFALIVTTLVLSLAGAQPFAAYKYIMLGAVGSWDVSVNLVSWV  
PLLATSGLLVTFVGLWNIGIEGQITLGAIFTTWAMRLLQDSGWNPSLILVIAVLAGML  
GGTLWALLAGALKTFGGVNEIFGGLGNFVATALNIWLIFGPWKRPGVASMSGTLPFDRS  
LWMPAAGSSRLTPATLVIAIVGIIAVYATIEGTYFGLKKA VGRNPKSAYILGIPTWQH  
MMASFAICGVFAGLAGAVQVTSVYHRLIPSISGYYGLGLMVAMLVGYKASLAAPVALFF  
AALNVGSIQLPIILKLDSSLAGVLQGTLVLFVILGQGVRTKLLKKTAVSS\*



>SPBDM4\_v1\_40216|ID:27157521| Inner-membrane translocator [Uncultured spirochete bdmA 4]  
 MNNSALVTSIAGVLAAPILFAVIGETISERAGVLNLSMNGMILLSAMGSFAVALATGS  
 VVLGFLAGAAIGALVSLIVAFASLTLLQSQVAVGFVLALLCRDLSYFLGNPIMGKVGPRI  
 SQVPIPGFERIPVLGTIFFRQDVMYLSFILIVLAWFFIFRTRPGLILRGVGERPAAAYI  
 RGANVNRLRYLYAVIGGAIAGLAGPIYSLSVKAGWKGTISGLDGIGWIVLSITIFGGWKP  
 FRAAFGAYLFAFLQWLGLVLQPSLPSVPSQVLQVAPFPLMILSLLL VNIGNAEWVDRSLS  
 RLPENVRRDIAKVL RAMNATPPAALGVPFEKE\*

>SPBDM4\_v1\_40217|ID:27157522| putative unsaturated glucuronyl hydrolase [Uncultured spirochete bdmA 4]  
 MNSYRTAVYLQVLASAAAALADCTSRPIKWN YETGVLLSALGELSRRRFAGLFDAPMQS  
 CVDELVLEDGTIRGYSVDEFNLDQINPGKELFSLWKATGRKAYEKAIRTLAQLAHQPR  
 ASGSYWHKKIYPDQVWLDGLYMFQARYGIEFGQPELIDDVCRQFLAVQVSMKHAASG  
 LYYHAKDEKGVSKWADPQTGCSPHVWARGVGWLSMALVDTLDWIPPEHGQRAQIMGMLAE  
 LLDAVVRAQQESGLWLQVADVPSGSGNYGETSASAMFAYALYKSVRAGYSRNETQAGQWL  
 RAASSALEGILTFIRWECPEGAI PRLHLGGICKVAGLGGN PYRDGSFEYYIHEPVVSDDF  
 KGTGPFMLALNEAIHFSRR\*

>SPBDM4\_v1\_40218|ID:27157523| Extracellular solute-binding protein family 1 [Uncultured spirochete bdmA 4]  
 MRKIVKAAV VLLLMMAAVSSAFGQGAKKPVTVELWYGAAITEAGPPPDDWVFYKIAREQL  
 GIELKLMALPSNDNDQDVKILAAAAANQLPDIFMVRREPWQVLIKQGLVADVDDMYPLMP  
 NRAENWFDQDSRTYTTINGKSYGLAFPGSLQKNEGLVIRKDWLDKLGKMP TTLDELFDV  
 CYAFTYKDPDGN GKNDTYGFGAFVEHFDQEYMGRRFPIMGAFGVAGTWNMTKQNFGLN  
 VKKPEFYEALQFVKKMIDAKVIDPDWPSLKKDDFRAAWKQGKFGVMREQFAALSASANYA  
 PFDKNFPNGEWAALPPP KGTGKSSVGIYDTNYRIYAISTKAAKAGKKEAIAKLLDYMAT  
 DEGYKLI GWGVEGVNYSIDANGNISDKGVPDET KFS SPKGQTVTQLRNMVFYNSNMELIS  
 RYPYFKTANGRTMGPLL YLKVFNFPWTNVTGSGTIKPHPNADLKRYINQGVQEFVLGK  
 RPLTKENFAAFVAQMDKLGAAEWEKTARQLMEESGYLQ\*

>SPBDM4\_v1\_40219|ID:27157524| ABC-type transporter, integral membrane subunit [Uncultured spirochete bdmA 4]  
 MAGTIRLTKSDKFFHFFIDAGLVLILAVLIVPIWSTLTL SFRPNDFIGSALDGMFLAPWK  
 WSTAA YRALLGHR SFLSAAGNSFRIFFEQVATALFFT VPLAYALS IKTLPGRKLLYGIVL  
 VPYLFNPGLVPNYLLVTKLGLSNTLAAVFLPGA VSVYNTLIMKSFFEELPEELKESARID  
 GASELTVLLRIILPLSKPILLTIGLYYG VHFVWDFNFAMLYINDAKLQPLPILLRNILLS  
 SGMNEYVEANAFGEAPIYAIKAA SVFLAAIPMLVAYPFIQKYFVKGTMLGSIK\*

>SPBDM4\_v1\_40220|ID:27157525| ABC-type transporter, integral membrane subunit [Uncultured spirochete bdmA 4]  
 MMEGQSVLLRNPASHALWRRIRHRSVYLVASISFIYFIIFKYIPIWNAQIAFRDFQALK  
 GVTGSPWVGLKNFSD FVNSYFWELIRNTVFYSVGKMAFSIPAAVFLAVALYECRIYGLR  
 KTVQTMAYLPHFLSWVIMYAILLAILSPSNGILNDIIKAFGGEPVSFMTDTKYFPWIVIL  
 SDTWKETGWSAIFLAALMGIDPSLFEAASVEGASAWQRVRYITLPAIKPVIVVLLLRL  
 GTVLDAGFNQIFMLYSLPVYSVADIIDTWIYRQGILEFRFLATAVGLFKGVFGLLLIV  
 SNKLIKRYTGNGLY\*

>SPBDM4\_v1\_40221|ID:27157526| protein of unknown function [Uncultured spirochete bdmA 4]  
 MQAHFPRIAFLASLHTGSARGLWPELIAAAQSHRCILFVLPGGRLNAVPGFEHMRNGVY  
 RYARSPNIDSALCWASTLSGYATEATVEQFLLDTVNVPLVTFGLKIGEHPFVGIDAYS GM  
 KALIKHFIRAHKRRIAFIAGPRQHSSAEERYRAYCDALNEAHIA YDSSLVCLDIPWTEG  
 RRAALQLLDERGLVPGKDFDALCAASDLLAFEAGLVLRERGM EIPFDIPIGGFNDSEESR  
 IFSPLTTVHMPFSHQALCALRLLSEMRKGTTPADMSLKT KLIIRSSCGCMLNSVRKAGR  
 SRTWADLSPDLIEAFKASLSVRQDRSFLVLLARMLDANIGVRGEVRGLQNTLSALRVEFL  
 KRAGSSGEAERTETLIHQGMVA VCLA EERKYEYRLWKEKQDEQKLNLFNQELLCAKDMES  
 IISAAAHLPELGIASAYLMTRDKQGALMFRGGFRQEKEHFPVEIVRPRRSCEIVPQGCF  
 LPDRMMPAEPGAYFVLPFFESTDLGHLVVQAIDIDPSLYEEIRSILSSALRGIMLFEEG  
 DEARKRAERA EKSDIVA VISRELRNSIDTFNASESDTSGRVVSGLEVSGLQVSRLKE  
 LVRYL DLSQAKSDVVLAKAALFDPYAFCVAWARGQCADSTYGLKIECAEPPSMYPALYG  
 DTEQLARILSILARLFAEMYQTAELKLSIAVLTRGCAL TSLPSVLSSRGDIPDLPKIEK  
 DIRLELARQISILHGGQIHFAKEKDGVSVTCLPYPSMNGAIRNISDDSKVVCFIGPDQS  
 VIESAFSLSADES FQVLPYNAVFNQEISKVQRMFLYLDPASIDHESSAALAFILDQDVFO  
 RAECYIALHASSEGAYPMLRQSADAAGFLRSVLLSDSPSAILMIGSETALHPGMVHIQHL

TQEAGIRLVACASPAAAEALNRWHPVLFLALEPKLETQGYGPLLRRFPTVPLIAASRSF  
EAKEEWTSLERPHTIFCNTGEVFSGLLTNLVQRSMEGQNFLPSPTACIVAKCIFFINKT  
YAEQLSRWKLASLLNTSEYLSRIFHKQMGVSLWEYLARLRVVNAIDMLRSTGASLAEIA  
DRTGFKDEAYFCRVFKKMTGATPGSFRIESFAEVRKVQESD\*

>SPBDM4\_v1\_40222|ID:27157527| Polygalacturonase [Uncultured spirochete bdmA 4]  
MIADIAEFGGTGDGQTDNSKAFAAIASLKRAGGGTLKVTRGTYLSGPIELFSNITLEIG  
ASAVLQFLPDMQLYSPVLRWEGIVCFGMHPLVFTRDAHDISLKGEGTIDGNNGPWWAAL  
RHKKSVMHQSCPVEPIEIALAEYNKDLIDQPSGGGGREMQLRPPLVQFFRCSNITIEGLT  
FRNSPFWTIHPVFSHDVTRDVFVQNPDPANTDGDIDSDCTNVRVENTTVDVGDCCIAI  
KAGAGERGLREGKASKQITIRNCHFQKHGGVIGSETAGGIHDVSVNDCTFEGETDRGIR  
LKTRRRGRGAVSGLRFRNLKMERVLCPVAINMYRRCGAKPEDKQALFSLKAEPLDSLTPS  
ISDIEISGLEAQGCRASAGFIAGLPESPIGGLKMEQCHIGLAGHDMVPVSESEMFEPIE  
TSARGIRIRHASCEFRDVRVMGLGNQEKPFVNEEGAKIKIDMPAP\*

>SPBDM4\_v1\_40223|ID:27157528| conserved protein of unknown function [Uncultured spirochete bdmA 4]  
MTPSKEMLDQIVHEEGELILERFTEEDAWEGLLVEEARKREARVAVDIRPAQILFHA  
ALEGATPDNDEWIRKSNVFRFGKASFAVGISLALDTTIEKKSFSVPLDYSHPGGAFP  
IRVTGCGLIACATVSGLPQEEDHALVTACIRKFKESKTAKKEHTAR\*

>SPBDM4\_v1\_40224|ID:27157529|corA| Magnesium transport protein CorA [Uncultured spirochete bdmA 4]  
MKWRWKKKGADAAESMDKPSQSANGHKKTRRVSNLPSFGVSDTAGLPPGSPRYIGDVEP  
TLATYSIYSYDEKSAVMFIPKDVSELLALIDLNVNWININGLSGGMVEKFCAMMGIHPL  
VIEDILNTEHRPKLENFDDYLFITKMLTMHEDGTIEYDQVSFILKGGKILVSFQESPGDS  
FKGVRERILAGVGKLRKLGADYLLYSLVDNIVDNYFIVLES LGDNLEGFEDASATEDDGA  
FLHGIQELNLELARMRRVIWPVRDSIGALARSDSIQMDYSLSPYLRDL YENTVQAIEALE  
SYREHTASIIELHLSEVNMNMSRVMKILTILSAIFIPITFIAGVYGMNFAYMPELELPWG  
YPAALGLMAIVVIAELIYFKVKKWL\*

>SPBDM4\_v1\_40225|ID:27157530|fucU| L-fucose mutarotase [Uncultured spirochete bdmA 4]  
MLKGIPEIISPELLKILHEMGGHDDL VIGDSNFPAASNAKRLVRADGHGVPEMLDAILSL  
FPLDTFVAEPVSLMQVVKGDSTVPEVHERIREVRRHDPGRGDSAVTSVERFEFYEKARQS  
YAILATTEPAA YGCIIKKGVIIH\*

>SPBDM4\_v1\_40226|ID:27157531| Branched-chain amino acid ABC transporter, permease protein [Uncultured  
spirochete bdmA 4]  
MTTTSKADS VRRGRSGRDPNLLRLFVMLVFVFLMTVLRPNQFATMAGFNSMMRQFPEYG  
IMAIGISLTMITGGIDLGVGTANLSAIIAAKFLIGTVPRGAASAQVVPYLIIVLLSLS  
VGLACGAFAGVLISRFNIPAILATLGTQQLFTGIAIGITSGRPQSGPLLYSRIGNMEFF  
RFIPISFVIFVVA VSVGIMLSRTRFGTYMYMMGTNPRASRYAGLNNTSITLRTYMISGF  
LSSVAGLIMMARANS AKADYGAPYTLQCVLIAVLGGINPNGGFGTISGVTMAILILQFLS  
SGLNMFNNISNFYRDVIWGGVLILVLVFNKLLSWREERRAVRKSMN\*

>SPBDM4\_v1\_40227|ID:27157532| Branched-chain amino acid ABC transporter, permease protein [Uncultured  
spirochete bdmA 4]  
VISLRITKRSEPYVLAAILLSLLIHVRSQGFFSGNNLVDLARS L IVPALFSVGCMMVI  
VSGGIDVSFPAIASLAMYVTDKLLLASNYSGNVILAYAISAGLGLLMGALNGFLIGFLRL  
PTLVVTLGTSSLYTGLMFGAFSASASDVPPSIKHKGEILFTATNPTMGLTSNMPSQILI  
LIAVLILAFFLLRYTMLGRGIYAIGGDETAERAGFNVRGIKMFLYCFVGVLAGITGIVR  
ISMMSYADPSTMLGMENTVIAAVVLGGTRVTGGMGTLTGILGVALMTILSNLILIGIP  
TYWTRVFTGAVIIIGTGVT AHQTISTRARRAQSQKAAA\*

>SPBDM4\_v1\_40228|ID:27157533| putative ribose/galactose/methyl galactoside import ATP-binding protein  
[Uncultured spirochete bdmA 4]  
MAASILRVEGITKSFGGVQALKGVSLEIGQGEIHCLAGENGSGKSTLIKVISGVHEPDAG  
KIEINGRQFSLTPKEAISLGIQVIYQDFSVPNLTVMENLALNNELMDKRKLMSYKRAR  
AIATHAVSQIEFDVLDLDERVENLSVANRQLAICRALLQEAKLIIMDEPTSALTKEVRA  
LFAVIKQLQSRGLSILFVSHKLDEVFEISERYTILRSGENVASGKTVDLDRKTFVYHMTG  
RQFEDGFYRPSAAKREPILSVQGLSLEGAYS DISFDLSPGEILGITGLLGSGRTELVELT  
FGISQPDA GKIFIRGKEVRIKSVKSAIGKIGYVPSDRLTEGLFLPQSVERNLVITALDR  
LSDHFGFLRRSAIADMTRKWIGELSAIAKSPTLPVWTLSSGGNQKQVVLARWLANDLSILM

LNGPTMGVDIGSKYDIHVLIRELAARGLAIIIVSDDLPEVLACASRILVMRDGAFVQELD  
PSATTESKLSSELSTGIA\*

>SPBDM4\_v1\_40229|ID:27157534| conserved exported protein of unknown function [Uncultured spirochete bdmA 4]  
MKRKLLLVLLVMVFALAVPLFGQSYDPMSFKSKKPMQWKIALVPKDATNAWFVRMEVG  
VKQFAKDTGINAFQKGPACTDAAMQAQVIEDLIAQGVDAICVVPVDPAALEPVLGLALS  
GIVVIDHEGASQQNCLYDIEAFSNEGLGQTIMMELAKMMNYQGVYTTMVGNVTNASHNEW  
ADAGIAYAKAHYPNMTLLAAEPRVEIMDNLDYERAKELFKKYPNLKGIFGTSSLSSPG  
VARAIEELGLKGFVTSVGLPNENKAYLKNGLTQTVLLWDPKDAGYAQLALAVKILKGE  
KIENGCNLIAPGWTSMQFAPGSKKVLQGGWITITKDNVDSFGF\*

>SPBDM4\_v1\_40230|ID:27157535| Regulatory protein LacI [Uncultured spirochete bdmA 4]  
MPYHMERAIKDWCHTMSIRLKDIAEAVGVSPPTVSLVLNNKPGAREELRRKILKTAKDLG  
YTAARNEKPGSLCLLHIARHGHTVNRDHDVFIADYIEGLSQGSKLAGYSLEIVTFKLAPM  
EQVLDTALSKTNGFIILGTELSREDAELFQAIKPIVFIDTYHEFLNFDVDMNEDSV  
FMLMSHLYERGHRRFGFVKGSIETRNIRLREMGFSKGLQKLGLEADTSFIFSV DQTYHGA  
YSDMKSILAGHPRLPTALICSNDIISGCLKAFAEAGVRVPKDISVVGFDNLPLSAISDP  
PLTTIQVSKAQIGRMAIQLLVSRIQGEADMPAVKVLIGGKLVERSVVKRIDIA\*

>SPBDM4\_v1\_40231|ID:27157536| Xylose isomerase [Uncultured spirochete bdmA 4]  
MKYSIILGNLGNLTCRDLSSGYKDQPSKETMIRQASEIEGVTGVELVGTWDITPQNADEI  
GELLDKYGLVCASVLPDHFSQKRWGRGAFVSLDSAIRAQALDETLIAELARKLRCSLVN  
IWPQDGYDYPLQADYLKARQWFVDAIRSAKAFDIRFSLEYKPKPRTHSFLARAADT  
LLAQEIGLPNVGVTIDTGHSFVAGENVAEAATLLSRSGNKL FHMHFNDNYRFWDDDMIV  
GSVHFVEFVELLFWLKEIGYSGWYSMDQYPYREDAQGALRNSVEFLQGIEAMLDKSMEE  
IRSVIAEGDAVKSTAWLKSIFPSK\*

>SPBDM4\_v1\_40232|ID:27157537| protein of unknown function [Uncultured spirochete bdmA 4]  
LLCAGGTTRLIGEERARQDIPKGLSRETFWMKDWKYSHTPTGISRLHVAQTASGCFGVTR  
SSH\*

>SPBDM4\_v1\_40233|ID:27157538| Filamentation induced by cAMP protein [Uncultured spirochete bdmA 4]  
MMPVRYHEGRFPPTNLDWQKIPLIGPAYASLSRYDGMLAAVSNPELLLSPLTTQEAVLS  
SRIEGTQATMGEVLEFEAGQAPTS DERREDIHEILNYRAAMRRAEELLKSLPFSQVRLRE  
AHKVLLDGVRGQNKSPGEYRRIPNWIGPPGCTLENAHYIPVSAEKLPMSEWERFAHSE  
FQDVMTQLAILHAEFESLHPFLDGNLGRMIPLYLWQKGLIRSPMFYISTFFEHRDE  
YYDGLLAVSRDDDWTGWCRFFLKAVQVQAEDNLKKAQGILSLYDQMKLEVP EMTRSQYSI  
RAIDWIFGQPIFNHVSFIESSGIPKPTAKRILSILEEEGILSVVVPGRGRRS AVVACSRL  
INIAEGKELF\*

>SPBDM4\_v1\_40234|ID:27157539| exported protein of unknown function [Uncultured spirochete bdmA 4]  
MTVFWARRFSIGVIASLAHAEEIQVIRLEVTFNFQMRQFPQMILVDIEMLGILF\*

>SPBDM4\_v1\_40235|ID:27157540| protein of unknown function [Uncultured spirochete bdmA 4]  
MSSSSLYLSRASPFHFSIVPAVWSDPSIASSIRWLLSLIFSLRLLTQGALGCRTPQSELS  
FNFFSRVRSWQEIALALLKKYTEHFYIQNHLWELPHLEIRYLEPDDLNFLGVGEASDDS  
Y\*

>SPBDM4\_v1\_40236|ID:27157541| protein of unknown function [Uncultured spirochete bdmA 4]  
MKQSKDLTKQLELLKSERDSLKDIESLRTSLDLLKTKSTELEKMRIELVITLMISEAS\*

>SPBDM4\_v1\_40237|ID:27157542| protein of unknown function [Uncultured spirochete bdmA 4]  
MRNYNRISKNREEIMVYSANGNSQETIAKKTGFSQSTISRELKKGEDRSVYNPFLAQRK  
ITLFVKHRYRTLKKNSTWRVIQNHLAIRWSPYEIMDLLHKSANDATIVPVSEKTIYNL  
NFLYEGGDEKAGAARTSPKRQNAQHEGNKKRGK PANITLIDERPEEVNARTVPGHWEGDL  
IIGKDHKSALS VIVEQQTR\*

>SPBDM4\_v1\_40238|ID:27157543| protein of unknown function [Uncultured spirochete bdmA 4]  
LIDWFENYIALEVRKSIEKRLKTLEPQLVKSITCDQGKEMTEHERLASSIKIKV\*

>SPBDM4\_v1\_40239|ID:27157544|yugJ| putative NADH-dependent butanol dehydrogenase 1 [Uncultured spirochete  
bdmA 4]  
MNNFTYQLPTKIIFGRGTENTVGSEVANYSKILLHFGGKSAEKSGLLGRVRSASLQIAGI  
EWIELGGVQPNPVLVLRKGIERCRRDNVGFVLA VGGGSVIDSSKAIAGVVFYEGDVWDF  
YSGDAAPPTKALPVGAILTIPASGSESSPGSVITKEEGALKRAVNADCLYPRFSILNPEL

AFTLPADQIANGVADIMAHLMERYFTNTPHVEFGDRLIEAALRTVIASAPLLFRGTHDYD  
AWAEVMWAGDMAHNNLLDRGRVGDWGSHGIERELSGIYDVAHGAGLAVIFPAWMKYVYRH  
DVARFAQFAARVWGVPEPDYLDVERTAIEGIARLEAFWKSIGLPLRLSELGIGTNRIDELA  
LRCTENGSKKIGHLVELDTADIAAIYRAAE\*

>SPBDM4\_v1\_40240|ID:27157545| protein of unknown function [Uncultured spirochete bdmA 4]  
MTKVQYGVSPAFFISLFGDKFTPDDVCEAMPVRRLGFGCFQAELVNFSSVDLWMKGGAE  
KVKNHATEMGLMSQFVAHFMIEMAFADENALFSDFGIEEMRKVFDIAGTLRKEAPITVAI  
GPYRSKAYDQKARVRA YARLIEKLSKIAQDALRLGLKLALAIQPGTLLEPGANGILKAIR  
DIGSGNVGYNLDTGHAWAAGNNVALYPEMLDGHIEGTHLCDNFGRENLSLRPGAGNIDFG  
YLIPALVRSKYDSSLDLEIFVPRDKVEKEYSAGLAFVKKLVEA\*

>SPBDM4\_v1\_40241|ID:27157546| conserved membrane protein of unknown function [Uncultured spirochete bdmA 4]

MEIILWILALMLFFIFIRVPIAFAIGLTGVISIIKGLPLELVTQRMFTSLDSFTLLAVPL  
FIFVGEAMNTGGVTERLFGFCRVLLRHVKGSLGHVNVLASVIFAGMSGSAVADAAGLGIV  
EIKAMREIGFDDDFSAAVTAASSTIGPIPPSIPMVIYAVLAEQSVGRLFLGGIVPGLLM  
AIALMILVYFISKKRNYPVEPRAKFGIEIVRSFLKAFPSLLTPAILGGILLGIISTTEAA  
ALSAVYALFLGFVIHKELTLKSLYEILKRTVISSVTVLIVISSANILTWIISSGSPDAI  
AALVQNITTNKLLVLLINLVLLFMGCFLEISILTIVPILLPIVNALGINLVAFGVII  
VLNTMIGLITPPFGLSLFVVSKLTNLSVSKLTKPVLLFAIPLVVVLLITIFPEVITFLP  
DLIMGKA\*

>SPBDM4\_v1\_40242|ID:27157547| putative TRAP dicarboxylate transporter DctQ subunit [Uncultured spirochete bdmA 4]

MAEINAPNGKKKKNSEFFRVLDKVLVTSVLLANIIVLMSFQIVMRYVFDSPPTWTEEI  
MKYSLVWLTFIGSVLAVRDKAHVLDIAFTNKLPAKLQRVVLFLSNCLSILFSLVIWGF  
RFARMNLSNYSLITKIPRGMVFSVIPVSAFLMILYFIRSMKEEK\*

>SPBDM4\_v1\_40243|ID:27157548| putative AP endonuclease family 2 [Uncultured spirochete bdmA 4]

MHKLFEPLALGTNLFKGYSLLEEALSYIASCGFEYVEIASIANMCEHVAPKDMSGKAAEV  
KKLIEKVGLKTYAFAGHVDLTVESDLKDFLKKIEFAAAIGAKIINTNSGPLSRLAEFREN  
MKKIITQAERFNMKIGLESHGDIIGTAKESVKYLKEFNHPLVRFNYDTGNTYFYSKGHVD  
VAEDIKYCFEYLEHIHLKDISIKGNVRYCKIGEGDINFAAVAESLKS LGKPLPAGLEIP  
VFMHGTIDLLSSADAPLPIELAKSAARDSKKYLENLQERR\*

>SPBDM4\_v1\_40244|ID:27157549| conserved protein of unknown function [Uncultured spirochete bdmA 4]

MIIAAVQKTAAILGGAAIIGRYRSEDFTTIDVKERIFVMKVAKAWEEEGVTIPAPYNRTI  
KVLFAFDKKGVNEITFSHALIHANSSTDSHTHDPRLIIMSGRGIACNGVQMPVEPDV  
VLWIEAGEEHQMINTGYETLKLATVFIPAYTAEFNYNRCLEAAKKARENA\*

>SPBDM4\_v1\_40245|ID:27157550| TRAP dicarboxylate transporter, DctP subunit [Uncultured spirochete bdmA 4]

MSMLKKSAILVLCMLVMVSTMPMTVFAAPTQQFTLKLGSNTAPSHPENQFARKLAELVSA  
KTNGNVTIKVYDSATLGDHLERQEGRLRLGTIDMTLTSIGYLGGINPIFNIFEMPYLFKDE  
KHQNKVYQGEVQKIAKEVENYGFVMIASFLEMGARHITNSVRPIVTPDDLKGLKIRVPET  
KSSIDALIAMGATPTPMAFSEL YMGLQQKQVDGQENPLSNYASKFYEVQKYLSTGHQR  
FEQICLFSKLNWKKLPKEYQDAIMQSAEANIFVQGVVAKKEGSLLGELKNKGMLINDVD  
QSAFIKKVLPLREQYAKLYGDQAKVYFDMIDAAGK\*

>SPBDM4\_v1\_40246|ID:27157551| putative Cupin 2 conserved barrel domain protein [Uncultured spirochete bdmA 4]

LYVIDCAKIEGVLIPAPYERLVKVVAPDTQDTVKDVSITMGIIAPHSRNDLHMHADGIE  
LLYIVTGYGKAIVGDTTYELKSNYLIAPKGVMMHQQINESAETMRMLAIWTPAVKGADVI  
SRAIEAAKV\*

>SPBDM4\_v1\_40247|ID:27157552| putative Transcriptional regulator, GntR family [Uncultured spirochete bdmA 4]

MKQTEEKPKVSNASLAYDAILKAVVNHDLPNPNLENNLCAWLGMSRTPIREALNRLRA  
EGIVEYVRSKGFYVCSLSIEKIRQSIEAIEALESMAVYLVAVDHSDFPLVEKAVLRME  
KDVESKDWDDWVKADEQFHAMMYKCCRNEYIVRYLTLQLIPAKQVRYLITKTYIDKSTST  
KAHRATYDAIIRNDPERARALAQEHFAWIRREAMNFLSNFNFLPKEIPSGFR\*

>SPBDM4\_v1\_40248|ID:27157553| conserved protein of unknown function [Uncultured spirochete bdmA 4]

MGLAELKATEGAMGRKKLTIEPVCKHHTFTWGERLTLQYYTGTNKYQKIRSPTLLGRVL  
GKHERTIRRELQRGMVLHERGDVPFEQWDYNAEYAQNDAERKSGGKGPDLKLGKDWAFVR

QVSRRIKERHYSPIYAIHQHFHTTGWSTMRICEKTLNYNIAAGDITDVSERDLLLQGRRR  
TPRERPARHSRAANAARSIDKRPAGINDRSQIGHWEMDTVYSGKECSPGCLLTLTERKSR  
VEITRKLDPRTAASMNAAFDAMERQIGHRRFCRLFKSITADNGGEFSDVQTLERSALCSQ  
PRRLYFAHPYCSSERGTNENHNGILRRFIPKASDIGLINKKAVRETQDWMNNYPRKILK  
GLVPLVELVNEMGEGFIIPFLELLE\*

>SPBDM4\_v1\_40249|ID:27157554| conserved protein of unknown function [Uncultured spirochete bdmA 4]  
VILFVLTNGFPPKTEKIPKEEIEVCKRRTQDYLRARGSKA\*

>SPBDM4\_v1\_40250|ID:27157555| ABC transporter related protein [Uncultured spirochete bdmA 4]  
MSILSVKDAGFSRKAGPLFEHAYLEIEAHDRIGLIGRNGAGKSSLLGLLIRELVPDSGEI  
AWARDFSYSYLSQNIIEVDPDGVTLRDFLYLGNATEISAAVEKKERGADPADNRQSNVPTIS  
LENRYRALCRELGLSDMDASLQYFSGGERKKAALARTLAPYSSLLVLDEPTNHLDVQTEI  
WFESKLAADQAFILVTHDRWFLDSVNSIVEIDRHTLHSPGYSYKFLERKAVDIASLD  
HMENKRLANLKIELEWLNRGARARATKSERRKKEIEKMRKSLLEEARSKVIFASNVARLG  
KKVCVMRGLGLSYGGRRLFGDFSWELGPGTKVGIVGPNNGSGLKTSLLKIIAGQLEPTEGSV  
EIGQTVRMSMFAQTNEAVDGLSVLDFIREHAHFALPGTSDLDAESLLERFDFPRTFQK  
QKLRSLSGGEMRRLMLVRVLVESPNFLLLDEPTNDLDIETIESLETYCAEFGSVLMVSH  
DRLLVDRLADELLIFDGHGQIERFHGSYFDWKLADAERAEASRAGAAAAPRSNATSSNI  
GKRTMPAQASDTAPGSPIQASKSNKLSYKEKQELAGLLKEIDALESEKRNLDFFFQDPSG  
AISGGAPFPAPIDFVEAGRHYEIDRLIAEKLARWEELASRE\*

>SPBDM4\_v1\_40251|ID:27157556| Xanthine dehydrogenase FAD-binding subunit [Uncultured spirochete bdmA 4]  
MHDFFEYIRPKTIDEAISFLDVHGP DARILAGGTDLLIQLRNNDIQPSFVLDLKNIPQLT  
GIQLNNGFVSGATVTMSEIIMNPLIDRHFPALIDAAKVVGSVQIRNRATLVGNICNASP  
AADSAPPLLVYGADVAVGSKGTRRIPLNEFFVSSGVTTLQKGEFVASIELPLPNKKMGA  
AHVRRTRRRGHDLASVTLCCGVEETGTVRLCYGSVGP RPILMVDESGLVADEKASEEAKA  
AIFESMFAQASPSKSMRASPAYRLAMLRVLGRQALELAISRLHEGGK\*

>SPBDM4\_v1\_40252|ID:27157557| xdhC| xanthine dehydrogenase, Fe-S binding subunit [Uncultured spirochete bdmA 4]  
MEKLIPVEMNINYQHYQLNVSPTKRLLDVLRDLGLIGTKECCGIGECGACTVLVNGRAI  
NSCLMLAVEADGTDILTVEGLSHNGRLDSLQEAFLKGA VQCGFCIPGQLIAAKYLLTQN  
PHPTRQDVEEGMAGNLCRCGGYERIIDAIVASVAENGEAQE\*

>SPBDM4\_v1\_40253|ID:27157558| Xanthine dehydrogenase, molybdenum binding subunit apoprotein [Uncultured spirochete bdmA 4]

MNLQTVGASPYRGGGFERVTGQQKYVADIKLPGMLESKLV TIDSAHAKILSIDTTDAKKV  
PGVRLVMTSADLPQPVPFRGFPQIADRPVLADGEVVKFHGEPVALVVAETIEAAEKAVRLVH  
VQYEELPVVFTVSTALDPAAPLVMDASLRPDDPLAKTNIFKEHHFGWGEIDDSKADLIVE  
NTYSFPMVTQFAIEPHAFIAAPDKDGI VVSTIQHPYWLQKILADLLKPLSKVRVYAPD  
PGGGFGGKQHTKYEPALVFAAMKLGCPVRLVLTLEETFQAVRRTSCDTHIRTGFTRDGTI  
VFQDITANYLLGAYVDIADR VVAKGSYAGAGPYNVPAVRIVSRSILSHTPPATAFRGFGN  
PEVNWAVESNIDEAARLLGIDRLEIRLNI AKKGDKFIPYDKPSDGDWRQTILKAAELIE  
WQKPLPPSHRGIAVGLKLGPTTGLSYSLV RLLADGSVIISCGTSDMGQGARTVFAQIAA  
EELGVPEYK VNVIMGDTATVLYDQQTSASRSTVLMGNSVLKACYSIHAQLKTRLAKVYQI  
DESEITVEHGKVKLPDREAPIVEFIK PALGKLGGEIIGIGEERKEGEKDHPLGGSACFYE  
FNCTAIEAEVDKNTGDITITRYVTVSDVGK SINPMQVHMQDEGAAVQGLGHTLMEHYIFD  
EKGRIRNLGAADYRILTTMDLPKEFYSETVENADGPGPYGAKGMSEGALLCVSAAVACAV  
GDAIGTTIKDLPLTPERVWTAIQTQKSISSPQ\*

>SPBDM4\_v1\_40254|ID:27157559|jolA| Methylmalonate semialdehyde dehydrogenase [acylating] 3 [Uncultured spirochete bdmA 4]

MSEIKQLQYWVDGGWKTSTTTKYMDCYNPSTGEVLARAPQCTVEEVESTIASAVKAYPAW  
SNTPPNKR VQVLFRMKALLDKHLDEL TLMVARENGKVLDEAMGDVLKVTEVVEFACGITH  
LLKGPALMNCTVG YD TTQYMESLGVFAGIAPWNFPAMIPMGWMA PLCIATGNTMIKAAS  
FCPQTAMRIMELWAEAGLPPGVNLV TCSRHEAEIFLRHPDVKGISFVGSTSVGRHIYET  
AAANGKR VQCLTEAKNHALVLKDAALERTARGIINSAYGCAGERCMALPVVVVEEIIADK  
LVALLKEQLEKLGKIPAYEPTSKMGPLVNAEHKAFVSNWIEKGIEEGAELLDGRKLVVN  
GYENGFYLGPTLFDHVAPDMSIGKKEVFGPVLCV KRVKNFEEGIELMNSSEFANGSVIYT

QSGYYAREFAKRTHGGQVGINVGIPVPLGVFGFTGHKNSFFGDLHAMGTDGIRFYTELKS  
VTSHWFSEDEAREGKVLNSWDGMISFPDKK\*

>SPBDM4\_v1\_40255|ID:27157560| conserved protein of unknown function [Uncultured spirochete bdmA 4]  
MAIDLNAYRAMFDLKGTNALVAGGAGGIGSAVSAGLAALGCRVFLTARHEQKAEEVAQAI  
REEGGEAIGLSLDVKS MENLERFSEDLHKKV PKIDVFINCVGTHIEAPAEYSEKDWDHI  
LSVNLKTAFFLSQEIAKHQIGAGGGKHIHVTSVRGQLGISRGYISYCVSRGGMNM MIKQL  
ATEWAKYGITVNGIAPTFTKTSLVAQYLEDPAFYKPLVARIPLGRVCEPSDIAGLAM YLA  
SHASDFITGQIMYVDGGLTATQ\*

>SPBDM4\_v1\_40256|ID:27157561| Beta-lactamase domain protein [Uncultured spirochete bdmA 4]  
LEQLTKNVFAETKLRGCNPGYVVTSDGVVVIDTPQLPTYAIRMREECEAKGHIRYIINTE  
HHVDHIFGNFFKSAEHVISHEETQKLFMVVYPQINPYEYAKEAMPTDDPEGIPLFPDEK  
TYFADPKRPDITITQDATIIVGDRTFNLLHTPGHTPGQLAVHIPEERIAFVGD TIFNHCQ  
TWLYTSNLEQWFRSLDRLLDLLVPGHGPVCTKQEIYVQRAFLLEWITAVATAVAKG  
WSKEECIANISFLDRFP CDIGQEYMGPEVTRNNVAALYDQLTVRMPVTVEKR\*

>SPBDM4\_v1\_40257|ID:27157562| conserved protein of unknown function [Uncultured spirochete bdmA 4]  
MKVFSEEMLSGDGMLRIDVVGEGREHVLEEMTFLNYRLADV KLRSEVRKQKPDIVWDVE  
ASKKAIRYDGVRLTLDGTWEQGELNKIVSMLALEMEK VGLHPFHSSSVRYRDKTILFLG  
GESNHGKSMSQIEGCRRGGLLVSTETTVD DRGWA VMGSKNVYLRMRAKGT ERADLPNQD  
EGVSKFFSENPPYINYS DPTNIDL VIMPGIDGHFDTKVVEMNRFEREYQTFHSLMNYFGL  
NQLSPPGIVMPIIDT DALRAKRGDFCSRFAADRPYFMIRAKTPQLLFDEIEKLM\*

>SPBDM4\_v1\_40258|ID:27157563| putative phosphoenolpyruvate synthase (fragment) [Uncultured spirochete bdmA 4]

MMFIRTFKELKKDMCEECGGKASHLGELTSLGLNVPAGYTVLGSAYYHHLEANDLTEKIR  
AIVATINFDTYEDPEKKS QLIRDLIIAAPMPPEIEKEIVEEY SLLPGEKDPFVA VRSSVA  
MKDSSISSFPGLMDTYHYIKGATQVVEKVKECWASVWSTRAAVTRYNK KLDHEKAVIAPT  
IQLMVNSEVAGVAFTMNPITKAKDEIMIESNWGLGETVVS GKATSDLYIIDKQTSEVKNQ  
TIANKEDSYVQAEGGGGKWIKVESFKAKAPTLTPEMVKELCRVAHIIEDHYGY PDIQIEWA  
FEKGQLYILQARKARASGE\*

>SPBDM4\_v1\_40259|ID:27157564| putative transketolase C-terminal section [Uncultured spirochete bdmA 4]  
MELGEEIAQRTAFGQALVELGAEKPNMLVLDADVGPSTQTHLFGRAYPDRFIEVGIAEQN  
MVGIAAGLSTLGFVPWISTFAVFMTKRAGDQIRNSIAHPKANV KINGAYGGLPTGRAGAT  
HSAIEDLAVMRAMPNMIIMDPADPREAAVCARLAMEIEGPVYLRTVRCPPVPVIFPEHHKV  
EIGKAVKLHEGKDVAIISGMMTPRALKAAEILEGQGV SARLLHMPTIKPIDIEAICDAA  
ESIGAIVTVENHSIIGGLGGA VCEVVAEYAPCRVKRLGFPDVFLESGDDEVLF SRYSLDI  
AGIVSVAKALAE GGGKKNK\*

>SPBDM4\_v1\_40260|ID:27157565| putative transketolase N-terminal section [Uncultured spirochete bdmA 4]  
MAHEHDVGFLESVAHQIRTLIIDTAHTAGAGHTGGSLSEVEILTALYFSFLNVDPECPDW  
NERDRFILSKGHASLGYVTLALKGYPFTDNLKTFDREDSTLQAHPDMHKCKGVDYSTGS  
LGQGLSIGVGIALGGLKKNQQFKTVLLGDGECQEGQVWEAAMFAGSKHIPKLI AIVDYN  
KVQLSNKVDENLSLEPFAIKWEAFGWNVLSADGHNIADLLSVLSRASALSARGPVV IAN  
TIKGGKVSFMEGKYEWHGKAPNDQEYTA AKKELGSK\*

>SPBDM4\_v1\_40261|ID:27157566| Alcohol dehydrogenase, zinc-binding domain protein [Uncultured spirochete bdmA 4]

VVEKTMKAIRLNAPNDFEYCDIPVPEPGSHDILARVETVAICGTDPHIFAGEFP GFWPKS  
FPLIPGHEWAGTIVQVGEVAKNLGWKEGERVCGISHVGCYCSMCMQGRYTLCLNYGHEE  
KGRHRQYGHYSQGAYAQYIAASVKS IARIPDTMGFDVAACMDPFSIALHAVMRSGMEPGDS  
VLVNGSGAQGLMSIMIVRAMGAGAILTSGSGFRLQVAERLGAITIDYRKENVVARTRELT  
GGLGAKRVIECSGTPEGVRQACEAVAKGGTISMVSLPSKDVEIPIRRLVLDEIDL RGNRA  
NPNTLEPAIAMVQENNIDLSSLITHAFPLSKFAEAFDIFVHRKDNSLKV VVKPND\*

>SPBDM4\_v1\_40262|ID:27157567| SMP-30/Gluconolactonase/LRE domain protein [Uncultured spirochete bdmA 4]  
MKENPIRNFHIDKTKINFIGKDLQRPECILAEPDGGLWAADAHGGVMHIRPDGSQELITQ  
KRSSDFTQSASDVDRFTKGTLPNGLAFAENG DILISNFGTDCLEVMKRTGETKVLMDTV D  
GKPIGKVNFLRDSKNRLWITVTTRVKNWIDALVPDLDDGYIIRLDELGPHIVADGFHFT  
NEVRFDKDEEFLYV VETTGGRILRFRVDEK GELRNREIYGPSHLGAGAYPDGIAFD AFGN

LWGTMVYSDKLFVITPDGEFILLLDEGDPEKVRRLDEAFYRKGVTS DILFETGQGIAPWM  
ASVTFGGPDLSTVYIGSLKETRIPIYFKSPVGPLPMVHWKHQK\*  
>SPBDM4\_v1\_40263|ID:27157568| Cupin 2, conserved barrel domain protein [Uncultured spirochete bdmA 4]  
MKIVHESQVPEIQVPGRYLRWIADAKSLQPEFLTSCVMRVSAGETVKPAHAHPDGEELIY  
VISGEGKVYVDGEVQVLKPGTAVL FQKNSIHMVRNSGTEEMKVICFFAPPASLDTYEFHP  
EVSFPEGI\*  
>SPBDM4\_v1\_40264|ID:27157569| putative C\_GCAxxG\_C\_C family protein [Uncultured spirochete bdmA 4]  
MVARRYFLRDDNRYGCAESTYIALKTIFGLSPEDSSPAMVLNNGGIA YSGGMCGAITGAA  
LAVGELAGHLPRDQDAKKLARATIQLLEEFQKQFSSDQCGVLIPYQISIPAEHEKFIA  
SGIWKTTCMRQIEFVVARLALLKDKNVWFGLD\*  
>SPBDM4\_v1\_40265|ID:27157570| Transaldolase [Uncultured spirochete bdmA 4]  
MPLQSYLQWLSESTVTNWWCDSGTPSEIKLALQHGAVGITTNPPLSATAISAKPGEWQTQ  
IEEIIKSATDPSAKAQELTRLVATQGAQVLSPLFARTSGKLG YICAQVDPKAGSREDML  
AMGRRFSAWAPNISVKLPATSAGLDVLEELAAEGIAVTGTVSFTVAQMLAVAEAHARGVQ  
RALANGKKSAPCNAVLMIGRIDDYLTEVSADNQS KASPDDIRKAGLAIKRAYALFKERK  
YDAKILVAALRGTYHATELAGADIILSIHPKYQKPLMENEAPKEEKYPVPIESQVLERLY  
TIKEFVRA YEPDGLSPEEFIFGVTQRTLSQFTETGWRRLETVR\*  
>SPBDM4\_v1\_40266|ID:27157571| protein of unknown function [Uncultured spirochete bdmA 4]  
MDNDKAYRILNDLLTEPRLGRLYSAMKTM YSELKISHNWEHIMRVTLNAVVLGTEENANL  
RLVIPAALLHDIGFVTNPSEPKKHNEYGASACHSYL TEWSEAERKKISDIILKHKGKYPG  
YTA YEPSTPEEKVLC DADQIDKFGWVGLLQVIK VYAEYGSIGYKNFDTLRGLAEGIEEAS  
HIELYTDAARKMAEALKEPSYHEVSKSVLAELAFYEGWKD\*  
>SPBDM4\_v1\_40267|ID:27157572| conserved membrane protein of unknown function [Uncultured spirochete bdmA  
4]  
MAEVKTKETIPFWLAVGITAI VFLPLTMFLGKFNIP LWVSFIVWAEFFNFGGT VKKAGKY  
ILLAFPAGAAICALGFIVS FLSAGIPGLAGPNGSGMWMWVGFGVA VCVLVYIMKFSKI  
FADGSLAYFN GMTMMIAVLFTNSYPQS ANAAIQVNTIIACLW TILSGYFGLFLGWFNMAI  
TFPKKVSE\*  
>SPBDM4\_v1\_40268|ID:27157573| PEP-utilising enzyme, mobile region [Uncultured spirochete bdmA 4]  
MDRNQVLARFFGDKEFPVEWVDEEEKLFWWFDDNHCPNPVSPMYFSLDGWWGPTCEYMY  
RRFDMPMGVKWP AKRINGYVYTAIVPRSEEEEAATGSYYSWVMPTYAKNFLS WWKDRYVP  
EVKNNFAYIDNFD AEHATLPELMVHLEEMIDIQERHFR LHWILNYAQFQVSTDFGALVKE  
LFGDVPSDLLGKVNISRADRNWDGLRELWKLKEK VKSSEELSEAFKSGTNGAEIRVLLQK  
TKAGSEFLKDVQAY ANEFGYKSIYTHEYRFLWVEDNTPVIEQIKNYFD TNYDYNKAYNS  
CIKEQDDAIAELRKRLASKSQADKDRFEQALDLNLRMMPLTPDHHFYFDQSTYARMRIVL  
LRVARKMVKEGILDDPEDIMYLEYQLRRYIANPKTYDGRGLIKKAKAEMEKASKIAPRP  
WVGTVTNWGM YMEPYHMLWGYPERFEKGSQQGIKGEVKGLAASPGIAEGVAHV VHSPAEF  
DSVKKGEILVCVMTNPAWVVVFSKIAGIVTDAGGVLSHSAITAREFMIPGVVGTSNATKE  
IKTGDKVRVDGSTGVVEIL\*  
>SPBDM4\_v1\_40269|ID:27157574| putative Transcriptional Regulator, GntR family [Uncultured spirochete bdmA 4]  
MAESYGK KKLTRTVLSEIQIKEQLMEDIFHRKYKAGDRIVESALARELGVSQASVREALRS  
LIAMGFLENFPKGITVRSFTAQDLMEVITVRIALETLAGQLAIKCITDEEIAELENITS  
EMIAASKEGDTQRR IHLNIAFHEKFVQTSGNKLLVQLYNYMRFGNWSLLTGNLSEMDPIQ  
ISTRHKILIDALKSRDPDKVAKALREHIESTSKPLSDMLIKEGAGVDKS\*  
>SPBDM4\_v1\_40270|ID:27157575| Glutamine synthetase, type I [Uncultured spirochete bdmA 4]  
MKLSEWNGDFAGIDYVSFIVIDIDGRMRAVSLPSSYASEAVLKKGIGFDASNFGYAKVHA  
SDMVAVPDMETGFVEQKDG FNILHVFCDVRTTAGQFFEQYPRTVIRAAHQTLRDSGVGED  
VRMLVELEFYVFEDVRYSTTSHHSY YFVESSEGIGDEYS DTPRVGMSQGYHRMAPEDRYQ  
LLRNRAVKT MIDVGILVKYHHHEVGAAQLEIELDFVSMTKAADS VSLAKWILRNEADELG  
LKVTFMPKPMYGVAGSGMHVHQFIVKDGASIFPGDGLHGLSKKGLAYTAGLLSHALTGSL  
LAFSNPSTNSYRRLVPGYEAPVSATFAQGSRAAAVRIPGYLGVKEARIEFRTGEATANVY  
YFLAAMLLAGLDGIKNELDPVALGFAKEIHHKKHIFPVGLLHVLGGLKKDNDYLAPV FSA  
ELIETWTERKKGKEASYVYNAPVPQEYELYFD\*  
>SPBDM4\_v1\_40271|ID:27157576| Indolepyruvate ferredoxin oxidoreductase [Uncultured spirochete bdmA 4]

MAQMVFSGDEAVAQAALDAGVAGAFAYPGTTPSTEIMEYQLQEHIGEAKDAGSSVARAPDGI  
TRVAQWCSNEKTAYESALGVSVFVVKRTMVSVMKHVGLNVAMDPFVNSALVRIHGGGLVAVVA  
DDPSMHSSQNEQDSRLLADFARMPCFEPSNQQAAYDMTRFAFDYSEAHEVPVLVRITTRL  
AHARASVTTAPAKPATDLGKTTDAYAWTLMAMPARKQWAGLLAKQAAFRADADAASRLEL  
GSKEFGVITCGLGRAYMENEEDWAQAHGGERPSRLHIGRYPVGMGKIQUALVSHVKRVLV  
IEEGYPYVERDLRGMFGPPVPVAGKMTGEIPLAGELSADSVRAALGLPRREGVAKVAIEV  
PGRPPQFCQGCPHADSFTALKKALEGEAEFFSASDIGCYALAAQPPWSAIESCVDMGASV  
GMARGAASVQKRAIGVIGDSTFYHSGMTNLLDAVRHRSPMTLLILDNGTTGMTGAQPTI  
SATSQPLLEGLGVEKEHIRVLEAHRRAIDADVAAIREELAYDGVSVIVMVRECIEWLK  
KARKS\*

>SPBDM4\_v1\_40272|ID:27157577| Indolepyruvate ferredoxin oxidoreductase [Uncultured spirochete bdmA 4]  
MTCDIIFCGVGGQGLSVSVVIARAAMASGFLVKQSEIHGMSQRGGEVLAHLRISDKEIF  
SPTIPK GKADIIFAFEPLEALRHLSWLSVERGTVVAAMTPILNIPNYPDIESVLGEIRKI  
PRSRLLIDADTLAKQAGNVRSANLVLVGAADLLPVPPEAIEKEVVALFSRKGEAMVQANL  
KAFELGRNIQHA\*

>SPBDM4\_v1\_40273|ID:27157578| putative CoA-binding domain-containing protein [Uncultured spirochete bdmA 4]  
MHNSQLHGNKLSADGKVL RDEALRIVARAKSEGRSALTELEGMALLSAMGIRTPKYWL VQ  
SADEFLEKVRKSAQEIPKTKKGADGDTFSDASGGAFRVSGGGSARSPPFGAKAVVKIISP  
QILHKTEVQGV EIVENAAEAIAAALRRMESRFGGVPRDGFVN EFVAFEPKLGHEMIFGY  
RFAPDFGPIVSFGPGGIYTEYLASKFKAGAANLMLSPRVSDQKTLETLLKENVVYGLLCA  
GLRNTKRELEPGALQEAIQHFLDAADALAAAGIGEFEVNPMVLSRAGELVALDCLVTLKD  
FSSMGLASDKDGLPVNMAQQTRPVQEIGRILKPASAAVIGVSEKNMNNGRILRNLIENG  
FDTSRLYVVKPETESIDGCRCVPDIASLPEKVDL FVLVIPAAATPSTLADIARQDKAWTI  
IVIPGGLEEKSGSGAIVAEMHRALADARAQGGKPLINGGNCLGIRSVPGKYNTLFIPEYK  
LPMPK GKVEPLAMISQSGAFAVTRLSKHQNP KYALTLGKQMDLTIGDYLDYLAQETEL  
HVLAVYVEGFKPLDGEKTEACRRISESGRSVILYRAGRTQAGAGAAASHTASIAGDYPV  
TKQLFAQAGAIVCDSLDEFDDAITLFTLLDGRKARGNRLAAVSNAGFECVAIADNLGGMK  
LSSFGETTRSAL EEIFKKARIAEIVDIHNPVDLTPMAGDDAYDGAFRMALFDPDSDLGIV  
GIVPLTGMMSL PANPSAHNEDITREDSLA VRYDKLVGETDKPFVAVVDAGPLYDPLCLE  
LEKRGIVVFRTADRALKMLELWRKSPAGRSE\*

>SPBDM4\_v1\_40274|ID:27157579| putative Dihydroxyacetone kinase family protein [Uncultured spirochete bdmA 4]  
MKISYLDGPRLRMALTAGSLSLMQNIGSLNAINVFPVPDGDGTGNMASTARAISASLATF  
CPKNAGSVLKRAAQSALAAKGN SGAILAQFFSVLAEELGHEARISAKQLASAAVLA AEE  
TRRALSIPKEGTILTVLHDWAHALHEKAQQSDDILHVFI AAYESA KTSLAKTKDMLPEMR  
RAGVVDAGAKGFVHMLDGITQFIKSGSLKEMLRADKWRSASGEIAHDVLAEPLFDIQAHS  
EFEILADADNATFRYCTEALVHGDKL DL DAMRAELATIGDSVVVAGSKSLAKIHVHANSP  
SLVFDMLDLLGFVEAHKVDDMKLQTKLAHRARGVQTCTIVTDTGCDLPEAFLEHGV LKV  
PALITIDGKARPDGPALAIQKVYRLMKERPDFAMSTSQPTDAAFSRAFALASAH SKEILY  
VGLTSALSGTFQAGVRATRALGGKIVAVDSKTVTSAQGLL VRRAVEMAEGGRDAQEIARR  
LEGLRGQLVFFVAVRNLSSLIRSGRLHGLKSLILRKFLRPLLSTDQAGKAKTAGIYMGE  
RNTVTLLSKVKKAFFPSGSRVELHVSHVDAADAQHLADLCA AHLHRDSKIMISEMGPVL  
ASLAWRGAISVAGLPLEG\*

>SPBDM4\_v1\_40275|ID:27157580|plsY| Glycerol-3-phosphate acyltransferase [Uncultured spirochete bdmA 4]  
MGAFFGVLLAYLAGSFPTGLIVGKLLFGKDPRERGSKATGATNIFRVFGAKAAIPVVLFD  
VGK GALAVFLASWMGRNAGLPREALQVMGAVAAMAGHVFPVFAGFRGGKGVATGAGALIV  
MVPTAAIFCALGFLVLGLTGIVSAASMTAAIVLPLAIALGAQGRPANPWYLGFGVAVAL  
FIVFTHRANIKRILSGQEQA FEKFRFLRRKKKSGNA\*

>SPBDM4\_v1\_40276|ID:27157581| PfkB domain protein [Uncultured spirochete bdmA 4]  
MRFDIIMLGHISKDIIIDEKGRETRLFGGALLYSSISAARAGAHVLAITKAAPEDFYALD  
TAKLQKGIELVTLESPSTTSIRNVFLSSDHEGRETSLLSRAEPFSAADIPGD AEAKIIDL  
AGL FVGELPDSLIEELSGRAAIAVDAQLLREAQPDGRMLFRDWKNKYRYMPFVRYFKAD  
AAEAEMLTGFSDREKAARTIAAWGRNAAGHEPEVMITHNTEAIVLVNGTMYRAPFTPSNL  
SGRTGRGDTTFAAYLAWRLMHN PQESLRF AAALCSIKMEKPGPFTGTLEE VFARMKR DAS  
R\*



>SPBDM4\_v1\_40277|ID:27157582| Extracellular solute-binding protein family 1 [Uncultured spirochete bdmA 4]  
MRKIFLSMMVLFCLLPLFSVGAQGTPEYKFLT VYTALPESELPTYFSEFEKDTGIKIQYV  
RLSAGELLARIRAEKGNPQASVWFGGSYDNFVPAAKDGLLEAYQSPELANIPKVYQDAMG  
YANPFYVGAIGFACNTDWFKKRGLSYPTSWDDLKPEFKSQISMAHPSTSGTSYTI LATI  
VQMRGEEGAWKYFTALNQNRQYTKSGTTPPMDVGLGEEAIGITFSHDGLKPAFEGYPVA  
MSFPKDGTYEIGCMALIKNGPAKEMANGKLFIDWMLSKRGQNLFETS KSFRI PVNTQAT  
PPKGAISVDSLKVINYDPVWAGNNRTRLVEQFNKVVAANNLK\*

>SPBDM4\_v1\_40278|ID:27157583| ABC transporter permease protein [Uncultured spirochete bdmA 4]  
MRENTRLSVAHLVRDPVLLFLVILVFTGLFLFILLPLYKIFSY SITTNEGKLSFQAAWDI  
LRSRTYLQPLKNSMLLGLTTGILATIIGYVFAYALTRVDMPLK GFFKTIATIP IISPPFI  
LSLSMIFLFRNGLITNKLIGIEDSNVYGMHSLVVVQTISFFPIAYLTLTGTLAKLNPAV  
EDAALNLGASRGRIFRTVTLPLSVPGILSSFLLVFIQSMEDFSNPAVISGNFSTLAVEAY  
RTITGMYDMRGGSLMALMLLAPTLIAYVLQKYWLSGKSFVTVTGKPTTSRRQSRDPKLMW  
PLFAFCMLVSLTIILFYGTVLVGA FVKIWGINFSFTWAHFKYVMTL GWTPLRNSVVLALA  
STPIAGLLGMIIAFMVVRKEFP GKRAMEFISMLTFAVPGTVV GIGYILAFNGKPFMW TGS  
AFLLI MAFTFRNMPV GIESGTSTLIQIDRSIEEASTILGATGAVTFRRISLPMLKQAFFS  
GLVYSFVRAMTAVSAVIFLISPRWNLATISIFSLFESSKYS DAAAYIVVMIVIII VVIGG  
LNLLVGR LGNSGT VSSGGSGERA\*

>SPBDM4\_v1\_40279|ID:27157584|fbpC| ferric transporter subunit ; ATP-binding component of ABC transporter;  
CP4-6 prophage [Uncultured spirochete bdmA 4]  
VSERDFSARSSNVSLHLTKRFRSLDGSGEVTA VNDINLEIRAGELV TILGPSGCGKTTT  
LRMIAGFEYPTSGSIFIGGRDVAMIPP NKRGLSMVFQSYALFPHLSIYENVAYGLRVQKL  
PAQEIRERTERALELMQLTSM AKRFP SQVSGGQQRIALARAIVIEPSVLLFDEPLSNLD  
AKLREYMRDEL RKLQKRLGITS LYVTHDQSEAMAISDRV VIMKDGWIQQVGT PREIYAFP  
QSKFVADFMGKANFIK VQVLGIEGEAARIEIEGMRFTVPRAGKAAPRAGSALLVVRPEAL  
RLLPLSSA QGSAALKGRIDRFTYFGNIARYEVSTENAPLLIETYNPEAS FVFEEGA EVGI  
IIDFESARLLPAEEQEIS\*

>SPBDM4\_v1\_40280|ID:27157585| conserved protein of unknown function [Uncultured spirochete bdmA 4]  
MSDAQQYDIAFLGQYTKDITVTKDGSRVVNGGAYFYGASAATSMGLKVAALTRLAPEDFS  
SFRFLEHDV LVKAISTQQSTCLQLLYPSGNPDDRILSVTSVAEPFEP SDEVESISAPVWS  
IGASIRGEVSLEVLKAIKAKGARIGLDAQGFVRVVRDQGLAYDTQWPEKAEVLQLVDVFK  
ADVVEAEILTGTRDLYKAAKILAKYGVPEFVLTHGDGVV VYADGSFFEAPFKPESLVGRS  
GRGDTCLASYLAARISMNPEKATFWSAAL TSLKMETLGP FAGTRQDVESALRERYGK\*

>SPBDM4\_v1\_40281|ID:27157586| 5'-nucleotidase/2',3'-cyclic phosphodiesterase-like hydrolase [Uncultured  
spirochete bdmA 4]  
MLKRVGKFAVLVAAIFTLAFTGTL SAQANLPGDVTLTFAHTNDMHGRIVESKDVIGFPRI  
YTA VQDLKAKNPNTILVDVGDTFHGLPVVNIDKGETAVKLMNELGYSYMTTGNHDYNYGF  
DRLMELSKMAKFEILAA NVYKDGQRVFPAYDIRDMGGVRVAFFGLATPETAYKTD PKGIQ  
GVTFSDPIVEAKLVVAELAGKYDLLVCLSHLG VDDSSDPTSITLAKFVPQIDIILDGHSH  
STLADIQKKN TTDLTITSTGSYGSGLGVVDVVVGPDRKIISK TARTITPQNSPDLKGD PK  
IAAMLDSLTKAQDAVLAQVVGKTA VALEGKREIVRTQQSNLGT LIANGMLYVTGADIALM  
NGGGIRDSIPAGDITMKQIYTVMPFGNYIQTGKLK GSELKAVLENGVGKLPAPDGRYPHL  
AGWTF TLDVTKPAGERVSNIMVNGQVPDPKDYVFTTLNFEFN GDDYRMLIGKAQNDFP  
SDAEVFIA YLKHIGTVTNDNMVYQK\*

>SPBDM4\_v1\_40282|ID:27157587|livG| leucine/isoleucine/valine transporter subunit ; ATP-binding component of  
ABC superfamily [Uncultured spirochete bdmA 4]  
MPVDMSQSSHVLLLEVKNLSK SFRGLMALQNYNVQLTEGEILGIIGP NGAGKSTVFNLLTG  
HLNLT KGSIVFRNIDITHAAPEEIAGLGIGRTFQNIRLFGSM SCIGNVIAAMQM KERQSL  
LGAILNLSHFREQEKRFAMQARTLLALFNLQE HADSPALSLSYGDQRRLEIVRAVALKPR  
LLLLDEPTAGMNP HESA EVINLIKRIHDEYHLTIIIEHN MPLVMKVC SRLQVLNYGEII  
AEGKPENVRNDPRVIESYLGRVG\*

>SPBDM4\_v1\_40283|ID:27157588|livF| leucine/isoleucine/valine transporter subunit ; ATP-binding component of  
ABC superfamily [Uncultured spirochete bdmA 4]  
MLQLLQVHTKYGQVEALGGISLEVQEGSLVALLGANGAGKTTTLMSISGILKPSSGKILF

RDTDLTQLDRTREIVGLGIIQCPEGRRIFGNLSVKENLRMGAIARRKDKRHLDDQAFARVFEI  
FPLLKERMAQAGATLSGGEQQLAMGRALMAEPHLLLLDEPSLGLAPIIVDKIFEVIQRL  
KQEGVTILLVEQNAHLALEIADYAYVLEKGRIVLEGSVSLRANSDLERSYLGEVPEENL

\*

>SPBDM4\_v1\_40284|ID:27157589| Inner-membrane translocator [Uncultured spirochete bdmA 4]  
MSAGEYISQQIINAISIGSLYALMAIGLSMVFILRLINFAHGDLIMVGSYTTVLLLSGG  
IPFVWASLAGIAASTIMGLLMERLAYRPIRGAPDVAMLLTSFAVTIFLENLAAILFKATS  
RAFPVPPVLNNTVVSFGNLQIASLNIISILLTIILLILLTLFVTKTETGISMRAASQDLVA  
ARLMGINVNRVIAAFAIGSFMAGVVGILWSAKVVKIDPLMGFNPVLKAFVASVIGGLGS  
IPSAVLGGYVLGALEILLQGLLPANVVPFRDALVFLILILLLLFRPNGILGSTEKEKI\*

>SPBDM4\_v1\_40285|ID:27157590| conserved membrane protein of unknown function [Uncultured spirochete bdmA 4]

MRRDRSTAIVSLAAIGITFLVLWLLHSFGGYYIERIVIGIGINLILVISLNLANGFTGLF  
SLGHIGFMAIGAYASAILTLPLSLKSTNLPDLPVFLSKIQMPFLPAVLVGGLIAMVVALL  
IGLSLMRLTGPIYSVATMGFLVIVQVVLTNWDSMTRGARTFAGVPEYTNVWNVWVWAILV  
LYIVWRIKFSSFRKMMMAARDNEIAARSLGINVMASRLLAFCISAFFTGAVAGALWAHFIT  
AFSPKSFYFSQTFVVTMLVVGGLGSLSGSVVGVMLITILSEILRNAERGFSIGPLVIPE  
VYGASQVIMAVLFLVFRPRGLFGDAELDVRFFKKEKEVSG\*

>SPBDM4\_v1\_40286|ID:27157591| conserved exported protein of unknown function [Uncultured spirochete bdmA 4]

MKKTVFLAAILVIFLVSCGGSGSKNIKGLMLYNMTGSQASLDGPSSNGAKLAAKEINAA  
GGVLGKQLELVSYDGKSDAETIGKAAAQLVEKDKVVAMFGFSDSDMVMAAAPIAAKAKIV  
FITSGATSPKLPSPQVPDYFLSFCGDNVQAAAAAEYSWNTLNAKSAYLLIDKGMETLLL  
GKYFQERFTELGGSVVLEDYQYTGDKDFSAQITKLKALKPEPDMLFISSGPDDIGTIVKQ  
VRDAGITSPIFGGDGYDTPLLEIAGKGANVYYTTHSLMDKNAGSPEVQKFAAYEAEY  
NTAPENAFAGLGYDTVYLLADAIKRANSADPKKIREALQTTKDLPGVTGSITFEPGSPIP  
QKGVAIIEIQDDALKLAAEVVPEKVPAP\*

>SPBDM4\_v1\_40287|ID:27157592| Creatininase [Uncultured spirochete bdmA 4]

MKKNPLEIQHLTTSYKAAPFDKIVLPLGSLESHGGHLPFGTDAITAHMIALDIAAKVPG  
TAALPAMPFGVSEHYKEFPFCISLQFETEIALIRDVLESIYREGIRKVFIMNGHDGNISP  
IEVASRSAKVAHPDFKIVSLDAWWVLVGSVPEGFFEWNGLGHGGEGETSICLELFPPEL  
CEMQYAKGVTPKLPYVDIKWRFSELTNTGASGDPTKGSAEKGETMRKVLVDTAVSILKE  
LEKKGWDYRSDEVK\*

>SPBDM4\_v1\_40288|ID:27157593| Metallophosphoesterase [Uncultured spirochete bdmA 4]

MTQIQIKRTRGLSRRTVLISALVALVLSIIMNGYFYSLLEGARGLYVWHPLLALKVLLFMG  
LGPISLAIVALPLEKLAKKWAMRMVRWCSFIGSILVSVASIALLAFLIIVPRVGPLEPAR  
LDLINPSQGIQSQEVQMEAGFSAGGVKDSATQSPEAEDAPGALSPLDRPLLRLSFSSDPH  
WGADTANATARTQVLEGIAASKPDAFFMLGDTVETGNSATQWNLALSDEALIPNVPLRP  
ILGNHDALFGGQYLYRKAFFPKDFSSDSGSPYYWSINTGSATIVAVDLPWGTMEFGARQK  
AWLEKTLAAADPRRPLIVVSHSYFYASGYDDPDFGTPWYDHYQNIPALVPLFEKYGVDLV  
ISGHNHYQELLSHNGVTYAIVGSMGGLPDPEPSHHSPYSKWIDVGGHGWLDVSVLPGRLA  
LTFRSETGEARQRATVGY\*

>SPBDM4\_v1\_40289|ID:27157594| conserved protein of unknown function [Uncultured spirochete bdmA 4]

MSEFHAKLYEARGQRTVAALKKNGFDALYIPTAALAAEKVLEFVHAGAKVGFSGSFTVKS  
MNIQELAASRGAVILDHKNPGLGAEKTEILRAQLTCDLFISSANA VTMEGFLFNVDGNG  
NRVAALSFGPKKNVVVAGINKVVANLDEAYERLKAAYAAPINNIRLQKPNPCVTSGYCADC  
ALPTRICRIYHILKRKPSLSDFTVIIVGEELGF\*

>SPBDM4\_v1\_40290|ID:27157595| 6-phosphofructokinase [Uncultured spirochete bdmA 4]

MPDFTIETLGKCAVDSPLGLASEPGERKPVFVSEGRYICYNIERDLGASTEERPADQRPL  
TRDQLELVAGPRQKIYFSPSHVHAGIVTCGGLCPGLNDVIRSIVRSLWHLVYGVRRISGIR  
YGYKGFPLPDYGLEVVPLDPDVDDIHKIGGTILGTSRGGGDRTPEIVDTIEQLNLNVLFA  
IGGDGTQKGALAAEEIDRRKLIKIAVVGIPKTVNDNIEFVEKTFGFDTAVVKASEAVAAA  
HMEAHSQINGIGLVKLMGRDSGFIAVQTVLAVHEANFVLIPEVVPFDLEGPQGFLTMLERR  
LARRGHAVIVVAEGAGQHFFNQTVAYDASGNRKLGDIGLYLKEQIQVYFDAKHMDINLKY  
IDPSYMIRSAIAEPIDSMYCERLGNNAVHAAMAGKTKMLIGLVNNEFVHIPIQAATSKRK

QVNPEGSLWRDAIEATQQPAQMVNSK\*

>SPBDM4\_v1\_40291|ID:27157596| Class I peptide chain release factor [Uncultured spirochete bdmA 4]  
MDNELLRASVTANAETDFSRSSGPGGQNVNKNVNTKVTTTRIRIAAIEGLSPSELELMRTRL  
ANRITTEGELVVQVQEERSQSMNREKAIEKLISLVARAAKRAPPRIPTKPTKASKERKLA  
HKKIRSSIKKNRQSPPEVEG\*

>SPBDM4\_v1\_40292|ID:27157597|bcp| putative peroxiredoxin bcp [Uncultured spirochete bdmA 4]  
MIQEGERAPDFALKDADGKTWTLSDFRGKTFVLYFYPKDNTPGCTTEACSFDRDYAEFKQ  
RGVEVVGVSADSEKSHKSFAEKKNLFPILLSDPEKKTIEAYGALGEKKLYGRTFLGIIRS  
TFIIDGDGIVKKVFPKVDPADHAREILDIL\*

>SPBDM4\_v1\_40293|ID:27157598|aspS| Aspartate--tRNA ligase [Uncultured spirochete bdmA 4]  
MLFEQRTVTCGELRAADIGKSVVLNGWVHRKRDHGGITFINIRDRYGVTQVVVDADSARE  
LLDTAAELKMEYCLSVRGTVRPRPDTMVNPSMPTGEIEVKAEKIQILSRCAPLPFMIDEQ  
TDAKEDMRLTYRYLDLRSFSMQKKIRLRHEAAFAVREYLVDKGFYEIETPTFIRISTPEGA  
RDYLVPSRLYPGKFYALPQSPQLYKQLLMVSGFDKYFQLARCYRDEDSRGDRQPEFTQID  
IEMSFVTREDVLTVEGMMGHLFRKTLGVGLPAQFIRIPYDDAMDRFGTDKPDRLRFGMEL  
LDFAPYVDNACSFQAFHDAVAEGGAVKALVVPKADYSRRQIEELEAKTKVYKAHGLAWM  
KVNQSGALEGGASKFFSEPARIVQGLGAKPGDLILIVADKKKKIACTALGAVRSQIGKDL  
GLCDPAVFAFAWIVDFPLFEFNEEENRWEAAHMMFTMPQTQYHDSLEADPGAVKGDLYDL  
VLNGYEIASGSIRIHDPQLKRIFRIVGMTDEEAQRKFGFLLLEAFKYGPPPHGGIAPGFD  
RLVMLMAGDTSIKEVIAFPKNSFAVSPMDQCPNDVDERQLKELHISIVQDK\*

>SPBDM4\_v1\_40294|ID:27157599| putative redox-active protein (C\_GCAxxG\_C\_C) [Uncultured spirochete bdmA 4]  
MAEVEEILEKDVSRSSFLKTTGIGLGVAAGALMFGTGIAGAQTQGGTVAETPLPYADLDP  
EEARIRAHAAAYFRAGCAYATFYAILSMLRDKVGGPYNQIPLRMLGYGRGGAASWGTLCGT  
LNGAGAAINLVASDADTNKLLGDLIGWYTITPFPSQESDNVAAVKGYTYDAKEYVTAALP  
TSVSNPLCHASVTSWINKSGFAASAPERAERCARLCGDVAAKAVMMLNEWKAGAFVATF  
KVSDTAGCLSCHSSDQIGKMACTSCHEPH\*

>SPBDM4\_v1\_40295|ID:27157600| membrane protein of unknown function [Uncultured spirochete bdmA 4]  
MKSSFDKVYDALRSIKLAAVLLVLLALLSIAGGIIPQGKTTGFYQLHFPGAGSRILALG  
LDHVFSLLFLLVAAVFAVNLTVCTFHRLTGELSKPRGKRRHGPDLHLGLIILMFGGIL  
TARTRTETLINLRRGESADLPDGAKIVLVDLNYEQYDPGRPKSWESTVVIHRVSAPAPSA  
ANTPAPSTPGGLPQYLIKVNTPRLKGYSIYQQSWHTEKQVVLKDAMGMSFSLEPGMRGA  
TKDGFVLFMALDNPSLGAAVPASSTPATSSAPAASSDPLPQSAIFLLEEHLGKRTVSKAAP  
GQGIGPFTFDGYIDQSVSGLAVVSDRGYPFVAAGFILVILGVFMTYIRKLGMLA\*

>SPBDM4\_v1\_40296|ID:27157601| Cytochrome C biogenesis protein [Uncultured spirochete bdmA 4]  
MIATIAFGLLILSLIIQIVYLFKKEGGQDVISPWLSLAAGILLVEIVRRSIAIRFVALT  
GMFESLIFLACFLALLIFALRYFKTTKGNRVIPFGATIIAVIFLALASSPLAPSEIKPPV  
PALQSGWLVLHVSFTFIGEVFFTVGFVSAILQLTTKNEEKRQSYDRLTYTSVAVGYPIFT  
AGALIFGAIWAEKAWGVWWSWDPKETWALITWLTAYLHFRLVRKSTSNLVPALVIVGF  
AIAMFTFFGVNLLRGLHSYA\*

>SPBDM4\_v1\_40297|ID:27157602| Stage 0 sporulation protein YaaT (modular protein) [Uncultured spirochete bdmA 4]  
MSDEYNDQALPEDMLDILHEEEFEAPHAAPRGTSAEELPQPIYRLKTLHSSETFHAYYA  
PSDESAHFMKQCDLEGALAGPRPALDAASSSAEPTDQVSSEASAAAGDFVIPARSLAIAP  
TKYGRDLVEVLGVVRELSAVNADELVLIERPATVDDYRRYLDNLEREKEAFIKCRERIEA  
HSLPMKLVSAHCLLDDSKILFFFTAESRVDFRELVKDLVSVFHTRIELRQIGVRDEARVT  
GGCGVCGRILCCHGLSDKLNVPVSIKMAKDQNLNSLSKISGPCGRLLCCLSYEHQFYRDA  
RRELNEGTRFTYDGTFLFKVIEVNVLSSRIRIAGEDGRILDMDAARLKYS DGRWTVIEEE  
S\*

>SPBDM4\_v1\_40298|ID:27157603| protein of unknown function [Uncultured spirochete bdmA 4]  
MNKRDFSDCVIGEGVVAEGKIDAPGMVRIDGAFSGDIISGASVIISKDAVVHAHIRARDL  
VVAGVFGGTA VVRHEVRYTGARVQADCTGDFLVMESGALVKGRFSRNNRVQ\*

>SPBDM4\_v1\_40299|ID:27157604| putative Peptidase M23 [Uncultured spirochete bdmA 4]  
VPEGLRSLKETEKRWYARLVQGLTGGADVVRVAIRFFSWGRARFVIALIPQSEKPARRF  
EISRFSFIAIGIALVLFVGLAVFSLSAYGATALRAASLDAQLTKARQNIDQMRESTENLL

SETAKFQEKLQVVDIAQSKGKPDVQQNTSDTLKTAGLADLISGQLSDDPVSRDVLRLNG  
IAGALDKSLPALDDIANVLASQKDVMTEVPNIWPVKGDLGHITMYFGQENENPFATGQWYL  
HTGIDISTNRVGDASILATADGKVIDIHVDASLGNSVTIQHSHGFTTRYGHLRSFAVKKGQ  
RVSQGDVIGYLGNTGKTTGPHLHYEVYLGTSLLIDPLRFLSIRKEYHE\*

>SPBDM4\_v1\_40300|ID:27157605| conserved protein of unknown function [Uncultured spirochete bdmA 4]  
MAIIEIHDVKKNYPLGKVEVQAVKGVSFLEKGFISIAGPSGSGKTTILNMIGLIDKPT  
AGEVIIDGKATSGLSDKELTRFRHEVLGFIFQSFNLIPVLNVWENIEFLLLKTRITKE  
EKNSWIDWLMAEVGLTEWKTHKPNELSGGQRQVAIARALVTKPQIVLADEPTANLDSAT  
GEQIIELMKKINRELETTFIFSTHDAKIVEIADHIIRLRDGTVTENRRRGEDVAASATTV  
EE\*

>SPBDM4\_v1\_40301|ID:27157606| conserved membrane protein of unknown function [Uncultured spirochete bdmA 4]

MPVTLRMAFRNIFEHKSLSLIIGTLLAVGALILVLGNSFIDTSEAGIKRTFTDNYTGDVF  
ISGISEDGDVSLFGVTSPGGLSSTPTIPDYEKVLSMVRESPLTSKATGMATGFALVSKEE  
NNEAPNQDSQSDTSNMAILFLFGIDATEYWNVFNSTEITAGKLEPGQTGLVVSDAHLAT  
ISKKLGKEVKIGDKILIQGISSAGFRLRELPIVGTYPKSESAMPEQMAFVDIDTLRVMA  
GMTVGANEAIDLKASDTAMLNTENTDALFGDDLLEAAPQKSGFDEAKIKAQLADTTARVR  
ANTADTGAWQFIVVRTKKASDASALIKYLNDSFQKEGHA VAGNWQKAAGPYSQSV DVVR  
TVFTIALIILAIVAILIIMNTFVISVIERTGEIGTMRAIGADKGFIRKLFNAEAAMLSLG  
FSTIGAVLATLVA AVLRSCLKIAAGNTFFEIFGGKYLIVTPANFITAIIVIMLVVGYLA  
NLYPVSVALKIQPVKAMQNE\*

>SPBDM4\_v1\_40302|ID:27157607| putative ABC transporter, permease protein [Uncultured spirochete bdmA 4]

MNKVIPRIALRNLSRQKRNILLGGAIAFSIMIVTLVNGFTGAFIENVSENFAYLMAGHV  
FIQGSERTASGKKISAIRDDSIIFDAIANSGIKYKTATRSSEASATLVFEGKSTSQNLTG  
FDLENSGFLRERLVLKQGTWDAVKAPDALIISEKVAKKLNVLPGDRVTARLQTVTGQNNI  
ADFTIAAISVDSSIIIGSAMTYVNLSYLNEAIGLKPDEYTSNLMLDDLKDSAPFADRLYT  
SMKGMGLQLFDRNQKNESGSTPPFQAMLQSQNKETWEGVKYRVYTIDDVLSQAKQIVNAL  
DTASTVVLIVLFTIIMIGIANFRMVMYERIKEIGTMRALGVQRGEIRSLFLYEALFLAL  
GGALAGIILALVGMNILQLINFGMDSPAFLIMKNGHLSFSLPPLRAIGNIAIIAVLTLVS  
AFFPARAAAKMEPAEALRTLK\*

>SPBDM4\_v1\_40303|ID:27157608| conserved protein of unknown function [Uncultured spirochete bdmA 4]

MKSLFHAGLAGVSSPAVIFQKKGDYMHPPIRS YGNSHKSR YTVLLLLLTLAFAIPLSGFA  
QTL SIPAAQKL VKELDDQSNFPGKDY TALFTIVSEKPG EKQTVTQV RTRFRD TKKQFTFL  
VMLPEVNKGQGLLREGDNIWFYDPTS RKFT HSSIKENLQDTEAKNSDFTASSLVDDYTVN  
AISEGTVGKYPVWVLDL KAKTNEVS YDRV KLYVRKDKAMMLKREDYSVNGRLMRTTLFPK  
YVELEGKLIASQILIMDEINKGEKSQITL TEQSVEKLPDKVFTKALIEQANS\*

>SPBDM4\_v1\_40304|ID:27157609| conserved exported protein of unknown function [Uncultured spirochete bdmA 4]

MPHGKGVKNMNRSTRMSV FVSLFIVLA AFSVQAQDSGSDVNLDELFGGDMVENPENVPA  
PTQNPVTAALATEKVRIGGSFYGSLEAAATWQDLWGGGSDLFSADSTSLDVLKSTIFFD  
ARNEDFRVYGSTKVAWSTLTGDSIAVPSIKVFELFSDFLNDQVFFRFGKSTVKWGVGY  
FWSPADVINLEPIDVLDATAQREGPINFRVHIPVLGTQNNFYLYAILDEDNVDFSTTALA  
AKAEFL LGNYELGTGIYRNETAERAMLTLTGPVGNFDIFGEAMLSRGS AKNFVTDIATT  
TPYTITSTKTDHRNSIYFSASTGFMYSSPKDNFTAIGQYYYNGEGYSEADRKGLIADAN  
TVIAALGATPTAAQYQQALAGLIYGSGRHYAALSVTQDEFLTKDTSISLLVLANLSDGSG  
FVRPSIAWQVVDNFKFSLSPTFIFGGADTEYSILAGGDTVSVSLGAIVSGSF\*

>SPBDM4\_v1\_40305|ID:27157610|htpG| Chaperone protein HtpG [Uncultured spirochete bdmA 4]

MPNYSFKTEVNQLLDLITHSLYSHKEVFLRELISNASDAIDKLKYLTVSDDAFKTLNFDP  
RITVTLDEDAKTITVSDNGIGMDEQELSEN LGTIARSGTKAFLEQLGENERKASNLIQF  
GVGFYSAFMVADQIEVVSLKAGTDKAFVWKS DGKSGFDIEPGV RAGFGTDVILHMNDEGM  
EYLSRWSIEELLKRYSNHIAWPIHLVSKEKTYAKDPAKAESKTVD EQVNSASALWRRPKS  
ELTDADYIGFYKSLTGDEKDPLLWIHTKAEGTIEYSSLLYIPSQLPSDLYIPTREQGIKL  
YVKRVFITDRELQILPAYFRFVRGVIDSEDLP LNVSREMLQHNRVMMTIQQATLKKLLGE  
LEQLATTNAEKFKTFISLFNVQIKEGLLSDWTNREPLLKLVRFKSTVAEGWTS LADYKAR  
AGEERKTIYYLTGENETRLRASPLLEVFKEK GIEVLLGTDEIDELV FSGIGEF EKMQFKS

VQQLDAEDELGKSAGEHQDRGEKAVKIIKSVLGGRVKDVRLSKRLGKSPSCVVVDKDEPT  
PAYKKLMERLTNEPAPESKPILEINAEHALVERLVALDTRKELSGGDIVTVQELEDIVYV  
LFYEALLAEGEHFEVPQDFSERLNRLAKAN\*

>SPBDM4\_v1\_40306|ID:27157611|rlmE| Ribosomal RNA large subunit methyltransferase E [Uncultured spirochete  
bdmA 4]  
MPGYDRPDYWTLRAKKEGYPARSVYKLEEIMRKFGLLKVLVDGRRTTEGGPDQIARPTRPRP  
SILDVGAAPGSWSLWLLRQMKGAGQLVAVDVQDLGIAPRDANFSFLKGNILDDAVRAALR  
DAGPFQLIVSDAAPATSGNRLVDQARSEELVEAVMGLAPEVLAPGSALIMKIFQGGEERR  
LSELRAHFAQARTFKPEACRSESFETYLVATGFARRD\*

>SPBDM4\_v1\_40307|ID:27157612| protein of unknown function [Uncultured spirochete bdmA 4]  
LILISGYLMKRVSFEYPEIDSLQLQQLSKDYAFPRDRVTRLLRMCRWNTRCGTTTSSRKP  
SVW\*

>SPBDM4\_v1\_40308|ID:27157613| conserved protein of unknown function [Uncultured spirochete bdmA 4]  
VSLEYALRHYNLIPEAVRVVTSITTGRRKRYRTPVGDYVHMPQRFLPLEF\*

>SPBDM4\_v1\_40309|ID:27157614| putative Nitrogen regulatory protein [Uncultured spirochete bdmA 4]  
MQMLLDELIAEYDPWYLVDPESEMPKALGELLRALPLPKGLDRDALLDALLGREEVMSTAI  
GNGIAIPHVRQFGSESLQKDIVVVAYLFEPLDWKAPDGQLVHTLFLVLAADETRHLQILA  
EIARLASDEDFVAFLKTMPEAALVERMRQME\*

>SPBDM4\_v1\_40310|ID:27157615| exported protein of unknown function [Uncultured spirochete bdmA 4]  
MILSKGKAKRLALFTVFGGVFLGLLGSCATTQGYDASIPSVSMHVQESDLSKYGASFA  
ENPFKEPNIVFIGKLYEFYIVKISLNLEEKTRIRVEADSRAAPDVSAPVAYNQEEFIHFV  
DIVSNQGGPNPAQYERRKRTIEDTVIPDFAFTENPGQSSYFLVFIGKRPIKRPISYEVRV  
VLENGESFLFSETVE\*

>SPBDM4\_v1\_40311|ID:27157616| exported protein of unknown function [Uncultured spirochete bdmA 4]  
MKKLIVLLLALAMVGAVFADDQKAVATFGAYLDSYGDFMDGLGPTLYSETYYNYSSGGVG  
FSATVVGAEIDFKQVRNYSVSYQVLPKVLVLAGRLRETGGARLTSYIDGNFSTRIANVQ  
NGMMGQVSYMGVGLGVFSTLDKFENTNVGLSYTVKDVAKVVGGLGTSDEFWVGADVLAV  
KGV TARLGRNTPANSYIYATAASSSLVDKLTALDADAVLSPFAVGAQGNAYAVTDKY  
SAGAKVWFDNGDAWYGNGFAAEGYGVINFAQGAMTVGLKYDVASTTFSIPDFEVWF\*

>SPBDM4\_v1\_40312|ID:27157617|ackA| Acetate kinase [Uncultured spirochete bdmA 4]  
MVILTLNCGSSSVKYQVYDWDKVDLANGIVERVTIGGSFITHKVRGRPDYEVEHECPNH  
VVAIELILKTLTDPEVGVIPDLSMIKAVGHRMVHGGSKFAKSTIINGEFLDTFKSLNDLA  
PLHN PANLMGVEAATSILPNVPHCAIMDTAWHQTMPASSYMYALPREWYEKYMVRRYGFH  
GTSFLYNAKRAAVLLGKDPFETNLIIAHIGNGSSINAVKNGCSFDTSMGLTPLEGLVMGT  
RSGDMDAGIVFHV MRKTGMTAAEIEKLNKESGVLGLTTKWADRRDVENAAEKGDVALL  
TQQVEGYRIKKYIGAYYAALGHVDALVFTAGV GEMGPEIRKLATEGLEELGIVVDEKNA  
LAKCRNAELDITGPGSKVKVFIPTDEELVMTEDTVALINGTYDVHTNYHYSFENRDYSN  
KARAEGLRDLEKKPWL RDIVARIP\*

>SPBDM4\_v1\_40313|ID:27157618|priA| Primosomal protein N' [Uncultured spirochete bdmA 4]  
MPASFVRVAYPIPLEETFWYRNPKSARVEIGMRVEAPLGRRPKAAGYVIEVAEAPSTENK  
PVSALPLDLTCLAPDKIRDILRVVDTEPLFDPGTLELGKWLAAAMYHCSLGEALSAMLPSA  
HREPKE LAEEFDEVEMSRTPVLTPGQNAALEGILAEPDGMFYLYGPTGTGKTEVFLQLA  
EATLAQGRGVLYLVPEIALTRQVEQDVRARFGARCAIHSRLTPSRKLAEWRRIAKSEAR  
IVVGARS AVFAPISGLGLIIDEHDSGYKSGTTPRYHARQVAMHRARLARARIVMGSAT  
PSPEAWQACADGRMRRFSLTNRPAGGSFPGIHIIDMRGRQGLISEELAQALRDAKSAGRQ  
SILFLNRRGFARTLICQTCGAEVL CRHCSVPLTYHKTSGR LVCHYCGYSESKPGACPECG  
SLDLVWASYGTERVEEELHEHFPDISHARLDTDTASTKGKLEDTLRAFRRGEIDLLVGTQ  
MVAKGLNFPGV RVV GILMADQGLSMPDFRAAERVFSLVQVAGRAGRHRPDGLV FVQTRK  
PESPIIRMAAAGDVPGFLERELEARRQLEFP PATRLCRIVFRSKSHRDARETAAKCAAVA  
HRLAREALFADVEVLGPSECPLAIVADNHRYQLIFRAHSFSLQRFVKVFRRSISPISV  
YLEIDIDPVQMM\*

>SPBDM4\_v1\_40314|ID:27157619| Uracil-DNA glycosylase, family 4 [Uncultured spirochete bdmA 4]  
MRMNEEVSRGPGVVAKEEATQESVAKTESAPGAASQPRQFLEDLLIEDFLRYGFRSQRQ  
IEAEEGNSAFGDSSSAEDETGFANEDRQARLKDIEARVRQCTACVLSQSRSRVTFGEGVT

NPQVLVIGEGPGAEDRQGLPFVVGASGHLDDKMLAAIGLSRKTNCYIGNIVKCRPPNRE  
PTPTERDACIGYLRAQIEILRPMFILCVGRTAAHSLLEVNDASRLRGRTFAFEGIPVRI  
TFHPSALLRDASLKRPAWEDLKQFRALMDGTADGPARTSKGGE\*

>SPBDM4\_v1\_40315|ID:27157620|lacZ| Beta-galactosidase [Uncultured spirochete bdmA 4]  
MERA WNAGWVWSPGPVADAFLEAWGGPARETADGPSAGTPAAGEGRASWIPVHLPDMMI  
GVPLNAFDERTFARRGCYAKALRKEDVGALAGTVPDAQTSADQAETHKAAPTDVALFLRF  
EGVSVSCRWVWNGRFAGSHKGPYTPFEVRIDPFLQPQVEACAAVSVPSAWILVEVDSAED  
AGIPFGAVVDYLAFFGGIYRGVSLCARTGAWLDAVWGAPRPRGDSLDGAWHLEISVEAKS  
FTGRIIEHGLSLRARLLRSGGLVAEGDVLPEAPLFEIQSAQARNDASLSANFSLSDVKP  
RLWDIDNPFLYDLEISLCGQTGRKLDTRTIRIGFRTAEFGPSGFYLNHRRVFLRGLNRHQ  
EYPYAGYAMGPDAQRRDAVMLKHELGCVIVRTSHYPQSPHFLDACDELGLLVFEELPGWQ  
HVGATWQEQAMTDLRDMILRDRSHPGIVLWVVRINESQDNHEFYARTNGLSRKLDYSRQ  
TAGVRYIAHSELLEDVYTFNDFTHDGEGTLYITEPAKVLPHKNKRAPYLITEHTGHMFPT  
KRFDQEERLVAHALRHAHILDAAMANARVAGCIGWCAFDYHHTKDFGSGDRVCYHGVADM  
FRIPKYAAVYVGSQVAPSERIVLEPASRFAKGERNAGYMLPVHVFTNCDAVDVYRGGAYI  
ARFFPDRAHFANLPHPPVIDDLIGERIAAEGWSRRDAKLFRRLAGRGMVGAARLNIWE  
RLGMGFFMLRHKLSTHLEELVMRYGWGSADEKIRLVGILDGKEVAERGFADGAAERLV  
AEADANRLDARDEEWA STRVVVKALDQYDNTVPFVFEPTYTIEVEGPARLIGPPQRALVG  
GASAFWVAGGAEKGRVRISVSSPRFEQPAVLELKV\*

>SPBDM4\_v1\_40316|ID:27157621| conserved protein of unknown function [Uncultured spirochete bdmA 4]  
MMNGQGEIPVEIVHLYTYDIGRAIDLKVASLVPAHHEIEFAKRRDTPVSLTLPKPMVLS  
ISTDECDKCFEKISAQAKIYEDAAVTLIVRYRTMSRFEDLSQKANMPIRDISNSISIEQ  
FAESSFRMIHEALRSAVSGYKELSENDREAYTAFCLLECPGGDPQAFIEDHKDIAASLLS  
GEPVGTLHLSQIEQVLCKPFSYRKDDIAIFDLERCLIIDPAADYDDVIMMAEHANYRLIE  
LRELDLFDLKWLGAEQDIRRLYLSGTRRRSGDRALRLKLAQIQGLRFDALFTLENLDNS  
SKIIGDYFLGSIYHRLCEIFNTDEWKFSIERRLGALQNIYDLLNTDTTEQRMMLTLELVFI  
AVCIIFPILQILQVMLVK\*

>SPBDM4\_v1\_40317|ID:27157622| PASTA domain containing protein [Uncultured spirochete bdmA 4]  
MAKKDIKDFQTQTIKESTSKAPEKVSATLKTVAETASDQHKRISEWTKPQKRTFVLFALLM  
FLVMVLVAVLVFFATLKGERTMVPDVRMDLADALMKMQREL YPRLTLRFTDNPLDRN  
LVLDQSPAGSIVKAGRRINLVSRGAVLDKVEDYSGRNIDDLKLYLQGLSTTTKVLVSI  
REPPLYIFDNSAPGIILDQTPKPGTEISGPTVLDLVVSKGPEAKDIPMPSLIGLSREMA  
SKAATTPLVFKYKMRAAHDKENPGTVVEQSVEADTTLKQLDTVQITVASPTARKGYTSGI  
FEYTLPEYPYVVPVEIDVIAPDGTRKSIYSVRHPGGAFNAPFSVQSGSVLVMVSGAEVT  
RKEVK\*

>SPBDM4\_v1\_40318|ID:27157623|fmt| Methionyl-tRNA formyltransferase [Uncultured spirochete bdmA 4]  
VRVLFAGSPDIAVPAMEALAASSHTVTA VLTNPASKVGRGLKMSGTPVAQAALRLWGDGV  
PIFTFETLKTAREAVAACNADILVSFA YGHIFGPKFMALFPKGGINVHPSLLPRWRGSS  
PIQHTILAMDEETGISIQTIAPEMDTGDLVQRIPLTGREKAGTSLGLCAHLAAPMVVE  
ALDAIDQGKARPRPQTGDPTYCGKISKEDGRVDWGRPSRELDARIRAFDPWPGSYTILRY  
MRLSILEAEPFDEFVPSIADEHVTNSVPGTIIA VAATKGIILKTGQGYLAVKHLQLASRK  
SVCREFANGVRDLVGTVLF\*

>SPBDM4\_v1\_40319|ID:27157624|def| peptide deformylase [Uncultured spirochete bdmA 4]  
MLDIVLYGEPILIQKAQEIKEFDHDLEKLAGDMHDAMKRDHGIGLAAPQVGASKRLFVVG  
LDNEPLRIFINPRIVAMSEKTSEYEEGCLSPGLYFTVVRPSAVDIEALDIRGKPFRLSA  
DGLLARVIQHEYDHLGILFIDRVSPAKRRRALAHYSRMLNM\*

>SPBDM4\_v1\_40320|ID:27157625| conserved exported protein of unknown function [Uncultured spirochete bdmA 4]  
MRKRYVSILQAIITSLFLVFFAACGQKGTVQGIDTPNPKLKTVDLAIGTATVKAVALT  
EIERNRGLMYRTTLREGEGMLFAFDRDQVVSFWMKNTKLPLSLAYILSDGTIVQILDLP  
FSEPRPSTRSIRYALEVPQGWFGRTGIKVGDKVQIPPLK\*

>SPBDM4\_v1\_40321|ID:27157626|rpsU| 30S ribosomal protein S21 [Uncultured spirochete bdmA 4]  
VRIHQITVEDNEPLEKALKRFRMVEKEGIIREWKSREYFEKPSAIRNREKKALERKLM  
KKTRKAQESKY\*

>SPBDM4\_v1\_40322|ID:27157627| protein of unknown function [Uncultured spirochete bdmA 4]

MLFSAGNLVTLVIVAAMFGVYHLLTADNRSLEKLRKLGDKLKDELGSYVESKSEEIKHYG  
IDLVDVQQAQAAKVVLEKIQAQATIDEKSDSITEIANRFKEYDNILAQLMDMTKRVDQNTA  
HLAEKNNFIEELARRVENADKKMNSIETEMPKVEEQFAHDAKQILDGFRDDILDQLHEQL  
TGIVNMFESKTDQAQAASSLREQIDRMTETALEAAASRAHNIEDSAYSALRTHIAA  
NFDELSRQTEERVAALSQNLDTLSQTAETKLSSLAAATSSQVSDTDHRLSEAKAALNAMT  
TDMARIQKETAETSTALSKKFKAEERDSLEEQAQFGQAFEAHRASFEKEFLDEISTLRAR  
LEEAQARTEDLKTAAEGNISTALGTFEEDVAQKLESSKAAMDEQIDSWLSSMDAKMRKIS  
QDALEQRKTEEARLAQEVNTELKRLKDSLYTQAQKIERDIEAFKDV\*

>SPBDM4\_v1\_40323|ID:27157628|deoD| Purine nucleoside phosphorylase DeoD-type [Uncultured spirochete bdmA 4]

MSLHIAAQSQIADKILLPGDPLRAKFVAENYLDNPVCFNEVRNMFYGTGTYKGGKPVSV  
GTGMGMPSLSIYVNELIREYGVKRLRIGTCGGMHEYVKLRDIVLAMSASTDSAVNRVRF  
NGMDYAPTASFTLLKAAWDSATARELRVFAGPVLSSDMFYTEDPDQWKLWAKFGVAVEM  
ETAELYTLAAKYGCEALSFLTISDNLITGEKTTSEERQLSFRAMMEVALDAIFA\*

>SPBDM4\_v1\_40324|ID:27157629| exported protein of unknown function [Uncultured spirochete bdmA 4]

MRKNCSGFGFVALLLGIPTIFMLASCKQAKVVEKPIETVPSQTNAEQKTLPPAPGHPPEAA  
VGVPEVSKQENILLVYRHTGSGYAEA YGFDTYVFRLLTDGSGQITGGIAYQRTIGGEIE  
AVRYNTSLSGDEISLTASSPGEKSWSDTLKLENRVDVSGAHKMOVATLTKALVFSSSDGN  
YRESYSTDPAQKDLPEIRKGGSLMEKGAWSYPETGKAVYAQTRPEDAQNAEGFQISLWY  
QDKGDFRFMTEGPEPINEVYATGFASVLASDHVLVNAVLLDLMLGDSRYLRPVYAFGISR  
RGSGK\*

>SPBDM4\_v1\_40325|ID:27157630| exported protein of unknown function [Uncultured spirochete bdmA 4]

MRTKTAIIVAVCLLVGAALQSFALQEGEAFDPALWSFIPGEPLSQDACAAAVGGDVRMS  
LNQNRKTLTVNVIDNEYEARLGRIPPEQVLEFDVHNRVVNTTQAPFMPAKAAGRTLAASA  
SVTTKPSQFPEGYWTVTAVKPRSDKYGPYMLSTNAVGNVEVYVSDGTGGQLSIGTYSDLG  
YALHSNTNAFNVSKSYGCLILKQEDVAMLAGILRQDRAENAKAVQKILVRSPGRIFDR\*

>SPBDM4\_v1\_40326|ID:27157631| putative Phosphoglycerate mutase [Uncultured spirochete bdmA 4]

MYARYEPKNVPDPRLLEALQREQADGPFSSSLGHDMSVFILRHGQSEGNARNTYQGRLDF  
PLSAHGEEQARAAGEWLCQFSPDYVIASPMQRARRSAEIVADLVHIDHIEFNDVLIEVDT  
GIFSGIDPDTAARRYPELWDEFYIKSWDAIPAAEPSQSMYGRAILAWKRILELGLQGASR  
IVCMTHGGLVQWLMKSSLGVHRWLPLLMSNCGISQYEIEMVKKNNPAFVQWTKINFHPP  
LAPEGPAPVF\*

>SPBDM4\_v1\_40327|ID:27157632| ABC transporter, membrane spanning protein [Uncultured spirochete bdmA 4]

MSSGVRTSRLHGRPDIVSLVIFAGFAIVAIFLIYPLFDVFRYSFLDKVTKTSLSNWKT  
FFSKAYYLRAFVHLSIALLTFFSMVLGIPLAFFTRYRIRGTNLLNTLSVLALLSPTF  
IGAYSWITMLGRNGFLRLFFQSIGINLPIYGAFGIVLADSLQYYPFISLMTAGALMTID  
RSLEEASENLGARSVRTFFDITLPMIIPSVTGGALIVFMMSLSNFGTPMIIGGNLVLPT  
LAYNLYTSEISQTPGMASVSVIVLMLCASVVIVLQQWLSSRRKYASMLVNRPVVVKRLKGI  
KSLLAHLLCYFIVFFSTLPLAVIVYYSFRKTSGPVFKPGFSLDSYRQIFFDVPKTMNSF  
LYSLIAVLLIASVGTLLGFVIARKRNAAVRVLDPMLIPYMPVPGTVLGIGFIVAFNRPPI  
ILSGTATIIVLTYFIRRLPYSVRSAAASILKQIDPALEEAGINLGSPPGRTFRITITLPLMQ  
GGIISGAIMSWVTSMNELASILLYVGKTMTPIKIYLSVADGYFGTASAMSTILLVVTG  
LSMFIVNKYFNRGSDTFIAA\*

>SPBDM4\_v1\_40328|ID:27157633|fbpC| Fe(3+) ions import ATP-binding protein FbpC [Uncultured spirochete bdmA 4]

MASIQIVDMEKHFGGEVQALSGVNLEIEKGEFFTLGPGSGCGKTTLLRTIAGFYHQDKGDI  
YIDGELINNVPA YQRNTGMVFQNYAVFPHMTVFDNVA YGLRVRKLPKEEISRKVSAALKS  
VHLEGYERRTPDKLSGGQQQRVGLARAMVIQPRVLLFDEPLSNLDAKLRIEMREEIRAVQ  
KSLGITSIYVTHDQEEALVISDRIAMQQGVIQQIGKPWEIYRNPQNTFVA YFVGKINML  
TMRLDEGAEQGLRRATLGNLSFLVPSEGTEGMHEVIAAFRPEDLIEAAKEGSQNEITGIL  
KTVSFMGSLARFELNVEGQEITIDRHRPREADMPOKGA AVSFAVPTQSMMLFDPKTGRI  
GKGGRR\*

>SPBDM4\_v1\_40329|ID:27157634| Iron ABC transporter, substrate binding protein [Uncultured spirochete bdmA 4]

VIACLLIAVSAWAAGGKVVVYTAHEETIINALVPMFEKETGIKVEYVKMASGDVINRAKA

EASRPQADVIWSIGGEQLEAENAILAPYTPKEWDKINPVYKVGTNWLPYTGIMNVFIVNT  
KMLTPDKYPKTWTDLMDTRFKLISSARADKSGSSYMQLCNVISIYGDKGWDVYKGMKN  
MVISASSGAVPKFVNDGEQAVGITLEDNAFRYVSGGGPVAIVYPADGTVAAPDGIALLKG  
APNLENAKIFIDWCLSKPVQEYLV DAMARRPVRTDCKDPKGLASLSTVKTIPYDFGWAAK  
NKAFAAKYADIAMDGL\*

>SPBDM4\_v1\_40330|ID:27157635| putative HAD-superfamily hydrolase, subfamily IA, variant 3 [Uncultured spirochete bdmA 4]

MYKAVIFDFGNVLCVERENFVRVAARHSRTMGAEDLLNALWGTELEYEFETGKFDSEHY  
FKRLQAIADFDPVYSYERFVEDYKRIIVPNPDGEWGLKTAAGLGARTFVLSNTSFLHASV  
IFDNEVLGTYPELYILSYKVGVMKPDPRIWKKLLEYTRLEPEDCLYIDDIEQYCEARSL  
GMSAFRYDFRTQYLSQELKNMLQ\*

>SPBDM4\_v1\_40331|ID:27157636| putative TPR protein [Uncultured spirochete bdmA 4]

VSRGRRRPLLKAFVFFVLGWTVASLPSTWAEDSYSTALSFLWDGRRLEMVETRQTESQ  
LAFQRSLAMTERLLTADPANSDLQTLKTWNLFRLHRYIDTVVYAQSVLNTKQDYRILETM  
AEALFFLGKNEEALAAFSRYFTLSPENDDRRSSAYYYVGEVYFRIKKYEHADIAFSTAVA  
LEKNMYYWWYRLGLVKEILGQYRAYEAFDASLALRSDFEPARSAKERVKAKSSL\*

>SPBDM4\_v1\_40332|ID:27157637|sudA| Sulfide dehydrogenase subunit alpha [Uncultured spirochete bdmA 4]

MSHKEDFTMDNAELELAKLRAAPITPKIRLQIPPQDMPAQDPSERRHNMDEVALGYTPAQ  
AMLEAERCLQCKNAPCIAGCPVRIDIPGFIGKVKGGDFLGAGKIIKTNLLPSICGRVCP  
QETQCQAPCTVGKALHSVGKAVQIGRLERFVADYERTHGAVEVPNVASPTGRKVAIVGAG  
PAGLTCAADVREGHDVTIFEAFHKS GGVMVYGIPEFRLPKVLVQSEAEVLESMGVDFEL  
NFLVGRTRPLLSLLREDGYDAVFIGTGAGLPKFM DIPGENLVGVFSANEYLTRANLLKAY  
MKGKAGTPIYPSHRVAVLGGGNVAMDSARMALRLGAEVVRVLYRRTREEMPARAEVEHA  
IEEGIIFFDLKSPTRVLGDDKGRVAALEVLSYELGEPDDSGRRRPVPIRGSEEIMPFDTV  
IVAIGNESNPLISQTPQLQVDRHGHIIVDERQKTSVERVYAGGDIVLGSATVILAMGEG  
RQAAQAINELQ\*

>SPBDM4\_v1\_40333|ID:27157638|sudB| Sulfide dehydrogenase subunit beta [Uncultured spirochete bdmA 4]

MHGTHKIVSKSQLSEEVFRIEVQAPLVAQERKAGQFVIVMYDEDFSERIPLTIADADPVR  
GTVTLIFQTVGASTHKLALKNPGDSIVLLGPLGNPHIERFGWAVCVGGGIGLAPLHPIA  
KALKEAGNRVTVISGARTKDLLIMQDELAIADEHIVVTDDGSFGRKALVTEPLKELCMQ  
SPPPDIVVTIGPPIMMKFCAETTRPYGIKTLASLNTIMLDGTGMCGGCRV SIGGTTKFVC  
VDGPEFDAHLVDWDGMLMRLGTYKEIEKEAHDRCHLEMRIEELAQGDGARAPEKEPAK\*

>SPBDM4\_v1\_40334|ID:27157639| conserved membrane protein of unknown function [Uncultured spirochete bdmA 4]

MAQRMPKIQVFRRVVLGTLVGLTVFTFLHQKLQGIPALDLPFGGLETFLKWL AGGDF  
IKKIEPGNIVLLGAIVALGIVLSRFFCGWLCAFGALQGVFGWIGKKLFKRRFEVPKKLDR  
VLRWMKYVILVAIYFTWKTGELVIRPYDPLAA YGHLPAGLTAVWTEFKVGFILLVLFMV  
LSMFYERAFCKYACPLGAVNAILSRVPLFRIKRDKPTCISCSKCDRVCPMNIDVSHAESV  
KSPECISCFECVTACPTKKDTLVATIGNKKTKLWTVVIIGFAIYAGAALIGQVTGMLRFT  
APSLSELSDKGTLNVADIKGSSTYEELAGAFGVLDLQLYRELIDKTKVPTTSMIKDTGK  
LAGIEDFETDQARVAVAKLLGIPYEGETTPTETATPEETTAEPGAAAPAVSSESSLMIP  
EGFALEGTMTIQDVAKALNATPQQVIGKLG LPQDIPLDKPLREMGSLYGYTMPQLKEKIA  
Q\*

>SPBDM4\_v1\_40335|ID:27157640| conserved protein of unknown function [Uncultured spirochete bdmA 4]

MSIPNVPKKIDSEALFRPADFLAYLGRIGVAVSHRPAPDAVILSYQKSLFEHVLETYPCE  
RAKGYFGRFIHYVDLPGSTKSIAIADFGV GAPAAVALEELIAWGVKEFISMGLAGSLS  
EDLPPGSLVVC DGA FRDEGTSYHYIEEDVPACPDAA LTGRLEAALRDAGLSYAKGPTWTT  
DAIYRETPLEVRRFRER GALV VEMEAAALFAVAQYRGAPLASCFSVSDTLAYLEWRPEFH  
AKPTVQGLETLFSCAVRALQ\*

>SPBDM4\_v1\_40336|ID:27157641| putative UDP-N-acetylglucosamine diphosphorylase [Uncultured spirochete bdmA 4]

MNPGERKNVSADSLKGQSDRFPALWDLKHSEFFGLFESAEPWDVLKLLDAYLQSKLESV  
SGPKIRSFIPHG VHI EGDMFIDE GCTIEEGVYIRGPAWIGKNCEVRSGCYIRGGV LAGEG  
AVLGHSSEFKHCVLLGLAQAPHFN YVGDSVMGWHAHIGAGVILSNFRLD GKVV PARALGS



KERIDSGLPKFGALIGDGCEIGCNTVLNPGTILGERSVVMPLSLVSGTWPRESRIENQAM  
RLPN\*

>SPBDM4\_v1\_40337|ID:27157642| conserved protein of unknown function [Uncultured spirochete bdmA 4]  
MRLLVLAAGIGARFGGVKQVVGVGPRGETLLEYSLFDARRAGFDHIVFLIRPEIEADFKA  
NILSRLPASVSYSLAYQKSVSLLDEAARARFEKSGRAKPWGTGHALLCARKHLEGKGPFA  
VINADDYYGLPGFEKVGHAHLSSSPGEFCFAGYRLDDVVPKGGSVSRAICLIDSQSYLSEI  
VEHRKVWRAGSLFVSQREEGTVELSPSTAVSMNLWGFNPSIFDYAERLWKNFLSEPANFE  
SREFFLPDIVQDMMREKAVRVRMVPASAQSFGITNPEDLQETRQRISRLVWEGVYPSPLW  
EGA\*

>SPBDM4\_v1\_40338|ID:27157643| protein of unknown function [Uncultured spirochete bdmA 4]  
MTFAAVSVRDSENIGIRPLGPDSEMLRRAISAFATSLIVSISIAIISILLTLGLTGSS  
VF\*

>SPBDM4\_v1\_40339|ID:27157644|leuA| 2-isopropylmalate synthase [Uncultured spirochete bdmA 4]  
MNTPTIRIFDITLTDGEGAPGCSMNQVEKLEVAGALASLGVDVIEAGFAIASPGDSASI  
HEIARTVRGPVIASLSRAVELDIDASWDALRGAERPRIHVFIATSPIHMKYKLRMKPDEV  
VAQAAAMVKYARKRCPDVEFSAEDASRSDFLEFLCRILTAVIEAGASTVNVPTVGYAMPG  
EFGSLIRSIRAGTPNIDGAVVSVHCHNDLGFVANSLAAIEAGADQVECTINGIGERAGN  
AALEEIVMAMRTRADYLRACGTGLRCNVDTTRIYPVSRLVSTVTGSRVQPNKAIVGENA  
FAHEAGIHQHGVLNRETYEIMTPESIGLPRNRMVLGKHSRHAFFDERLRELGRLEAER  
AARLFEAFKILADKKKVTNRDIEALVRGAVPDRPAAWRLERFIINSGSTITSTS AVCLV  
SAGGQTCEQVAIGDGPIDASFNAIDKIVNAKPVLEDFSLDSVTDGKDAQGEARVIRLAD  
RTYNGHGVSTDIVEASVRAVVDAINAVLGAADDASRPEDTANKRDGTKAFAETERSNQ\*

>SPBDM4\_v1\_40340|ID:27157645|leuC| 3-isopropylmalate dehydratase large subunit [Uncultured spirochete bdmA 4]  
MTMTQKILADHAGLPSVEAGQLIEARVDLVLGNDVTAPVAIKEFEKIGVAEVDRRRIAL  
VPDHFAPNKDIKSAEQCRIMRDFARKHDIEHYFEIGRMGIEHALLPEQGLVLPGLVGA  
DSHTCTYGA V GAFSTGVGSTDMAAAMAAGTAWFKVPGAIRFVLNGALEGWATGKDLILSI  
IGAIGVDGALYRSMDFDGPVATLSMDERFTVANMAIEAGAKNGIFAVDERTRAWAVAVS  
PRSFKEYAADPDAEYERTIAIDLASVEPQVAFPHLPSNARPAEAGETPIDQVVIGSCTN  
GRIEDLRAAAFLKGRSVAPGVRCIVIPATQRVYQQA VREGLVEAFIEAGAVVSTPTCGP  
CLGGHMGILAAGERAVATTNRNFVGRMGHPGSEV\*

>SPBDM4\_v1\_40341|ID:27157646|leuD| 3-isopropylmalate dehydratase small subunit 1 [Uncultured spirochete bdmA 4]  
MEQGCRVWKYGDNDVTDVIVPARYLTTGDPVELAAHCMEDIDPRFAAGVLRGDIIVAGEN  
FGCGSSREHAPVAIKASGVSCVIAKSFARIFYRNAINIGLAILECPEAAEDTRSGDRLTV  
DFESGEIRNLSRGARYRAVPFPFVRNIMTAGGLIPYIRGKLLKPGAHLGVGQGGD\*

>SPBDM4\_v1\_40342|ID:27157647|leuB| 3-isopropylmalate dehydrogenase [Uncultured spirochete bdmA 4]  
MKYTIATIPGDGIGPDVVAEAVKVARTVAGVSGFTVEFMETLMGGAAIDATGSPLPDSTL  
RACRSADAILLGAVGGPRWDSLPGNLRPEAGLLGLRAAMGAYANLRPARIFPELAAACPL  
KPEIVAGGMDLLIVREL TGGIYFGERGKSPDGEAAW DTERYTKAEIERLLEVAFRAARSR  
KRKLCVVDKANVLESSRLWRQVAQAAAARYPDVETTFMYVDNCAMQLVRDPRQYDVIATS  
NMFGDILSDEASMITGSIGMLPSASIGDSGPGIFEPHGSAPDLAGKDQANPLATILSAA  
MLLSYGLGRHDEAALIEGAVSSVLAAGCRCADIATGAAEETVLGTRAMGEAVARAIEEAA  
R\*

>SPBDM4\_v1\_40343|ID:27157648|ilvD| Dihydroxy-acid dehydratase [Uncultured spirochete bdmA 4]  
MRSDKAKLGPAPERHRSLLKAAGYTDWEIERPWVGVANAYNQIIPGHVHLKRITEAVKAG  
VYAAGGLPIEFPTIGVCDGIAMNHLGMKFSLSRELIMDSIEVMAQGHAFDALVLVTNCD  
KIVPGMAMAAARLNIPSVVISGGPMLTGTGGKEIDLNTVFETVVGKHIAGKASDADLLEV  
ENAACPGCGSCSGMFTANTMNCMMEALGLGLPGNGTIPAVYSERDLAKEAGRAVMQLLE  
KGIRPRDILTREAFENAVAVDLALGGSTNTTLHLPAIAWAAGLDFDIELFNELGGKVPHI  
CSMSPGGSYHIQDLYRAGGVQAVMTRLARGLLHENCLTVTGATQGENIAGARVVDDEVI  
RPLDRPYHATGGLAILRGSLAPDGAVVKQSAVAPEMLVHTGPARVFDSEEEAFAAIQARK  
ILDGDVLVIRYEGPKGGPGMREMLTPTSALAGMGMDKTVALITDGRFSGASRGASIGHIS  
PEAATGGPLALVREGDLIHIDIPGKKIDLLVDEAELARRRAEWKPYVQPVDSLFLNRYR  
VVTSGMKGAVLE\*

>SPBDM4\_v1\_40344|ID:27157649|ydbK| putative 2-oxoacid-flavodoxin fused oxidoreductase:conserved protein; 4Fe-4S cluster binding protein [Uncultured spirochete bdmA 4]

MTNNTKKMVMIDGNAAAHAHVAAHACSDVIAIYPTPSSPMGELADEFSSMGRKNIWGTIPQV  
VEMQSEAGAAGAVHGALTTGALSTTFTASQGLLLMIPNMYKIAGEATPTVFHIAARAVAA  
HALSIFGDHQDVMATRQTGWALLSSNNVQEVMDLALIAHTATLKARVPFLHFFDGFRTSH  
EVSKVEELPYDVMREMIPEDK VREHRARGLNPEHPTIRGTSQNPDVYFQGREATNKLYEA  
VPGIVEETMKRFAQLTGRSYKLFYAGAPDADRIIIMGSGADTAETAAYLAKQGEKVG  
VIKVRLEFRPFSVQHFIETTVKSIAVLDRTKEPGAIGEPLYEDVRTAIGETMGNGTAP  
FKGWPTVVGGRYGLGSYEFTPAMVKA VFDNLKAAQPKNHFTVGVVDDVSFTSLPYDESFH  
LPSEGVVECLFYGLGSDGTVGANKNSIKIIGDETDNSAQGYFVYDSKKAGTYTISHLRFG  
PKLIKKPYLIGKADFLACHKFSFLEKIDMLSNLKDGGTFLLNSPFSAEVWDNLPLEVQK  
QIIDKKLRFFVIDAMSIADKAGMGSRINTIMQTAFFKISGVLPEGEAVGLIKKYTKKTYM  
RKGADVQKNTAIDMALNATQEVKVGQATS AKHMLAPVPETAPAFVRET LGELIAQRGE  
KVPVSKIPLDGTFTATTQYEKRNIAEKIPVWEPSICIQCGNCTMVCPHAVIRMKAYDPA  
LLTKAPATFKSADGKGKELAGLKVTVQVAPEDCTGCGACINICPALDKANPGKKAINFGP  
QIELRETEKENWDFFLSIPETDSKVLNLSIPKGIAMKRPLFEFSGACAGCGETPYVKLV  
QLFGDRAVMANATGCSSYGGNLPPTPYAKRADGRGPAWSNSLFDAAEFGYGMRLTADK  
QNEYARELLGAAKGGKVAADLADRLTNVQENDEQIEAQRADVAALRKALGGKNEEWAKE  
LDNVADALIRRSVWILGGDGWAYYDIGFGGLDHVIASGKNVNLVLDTEVYSNTGGQASKA  
TPIGAIARFATSGKDIFKKDLGMIAMSYGYVYVAQIALGANMSQAIAIREAESYDGPSI  
IIAYSHCINHIDMMKGMQKIAVQSGVWPLYRYDPRLKAEGKNPFQLDSKEPDYSKLE  
QYMYAEVRFKSLVQANAERAKMLLEKQRGLLERRYKEYRYIADRPF\*

>SPBDM4\_v1\_40345|ID:27157650| conserved membrane protein of unknown function [Uncultured spirochete bdmA 4]

MNVVKSYSKWTIASAVSVLVLLLLPSQLFPKTPRGITIEIDKIVHAFLFGAVTAIFCAEHRQ  
WKKMNPPFFFSFIVIGAF AFLTETSQ L ATKTRHFDMKDFSADIIGIAAALLIMRLVATMG  
ASLHKGKDK\*

>SPBDM4\_v1\_40346|ID:27157651| membrane protein of unknown function [Uncultured spirochete bdmA 4]

MKDFENQISSSTKKETTSTPAPDIDPSALPLLQKSSFFFLLVSVFFIVLNIVLVTLKPE  
RPPLRHYSPEFLIIEGLFSLGFLIASISRSLSWLGPIMLLAFLPFHLSSHASMYSLGAF  
LIAIIELYRIGFFKRAGLFKITTLFIYYALT VLLVGIARSV FVVEIIMPIIFLFLFLYL  
LPLFQGWQINILRPRQKIRYKDLNLSERETDFLKQCLDGATFKEIASRNHVSESTVRNT  
FAHIYHKFEVSGRRGLLSKFADFDIID\*

>SPBDM4\_v1\_40347|ID:27157652| MazG family protein [Uncultured spirochete bdmA 4]

MDLDSNSLQAIAGQTFEQILPDAEKTAFAFKLFYTVVARLRAPDGCPWDLEQTPSSIRGN  
IIEEAYELAEAITENDNPHIEETGDL YLLATMVAYMGQQEGRYTVADSLCEGARKLIRR  
HPHVFGESDVHSPDQVVRQWNEIKERVEGRRKDSLLDEVHRHLPPEKAYKLQKKAACA  
GFDWQNSHDIWNKLEEEELAEKQARAASEENAPDSGDALEEEFGDLLFTVINAARLYGID  
PSIALHRANEKFSRRFRHVETRMKQNLAMSPEYFEQMDAFWNEAKREEDAGETSSKVTK  
RQP\*

>SPBDM4\_v1\_40348|ID:27157653| Major facilitator superfamily MFS\_1 [Uncultured spirochete bdmA 4]

MAVPLSAQKLASSRKT FNINLNFNSFSFVSVSGSIITL FALRMGAQNSIIGLLNALVYIT  
FFMLPLGKRMVRHTSIKVFVGWGWVIRYIALIPILFVPLFASKGQMGAILVLILGTAGF  
HISRGVAMIGNNPVLGLLSTGGGDKSRSDQGRYL VNVSVVNSVAAILANIVLAFLLGEQA  
SLWTYAIAIGIGIITGLIGCIFLFKMPEPDAFSSKDEQSLWDVTKEALLKPEFRAFIFTF  
MLLSFLSGMGRSFLPVYAKQVFAQGD DAIMVYSIVAGLGSIAMGLITRLVVDRLGSKPLF  
IIYSAIGFISFLPIVLIPSGAMMSAPAMIGLFLSVVHFLSSFGFAGEENAAQVYYFGLV  
PKEKMLDLAVIYNLAYGIGGSLGSLGGMLEIFTNVGLSTDV SFRVYYAAICIVLAVVI  
YSMRNLPHMGAKSVS QLSILFSPRELRAFDLLTRLDQSASAAHEEVHILQELGKSESNT  
QKELVEYLHSPRFEVRSEALLALESIPELDTETIGALIREVKTNVYSTAYVAARILGKQR  
SDTAIPALVDSL DGPDYMLQSTSMVALARLGYRPAIAKIEEVIRSIENPRVRISGAYALE  
LFGSIDS IPTLISCLKAEDRPANVSDEL VLTISGILSINKEFYLLYSEFIEDNRSQVAQL  
TAHAHDLPLGKEPLQAWLSAVEALFAPTPTVPLARFLSSSKITSSILILSDALLDPKL  
DYPGFNYLCA YVALHIETLKDY\*

>SPBDM4\_v1\_40349|ID:27157654| conserved protein of unknown function [Uncultured spirochete bdmA 4]  
 MLTSKQRSTLTGLASQDCVVQALGKNGLTEAFISQIEVLLARHELIKIKFLDFKDEKRRI  
 SEEIARTHAELVRVIGNNAILYKQNPDSEKRRVVLQ\*

>SPBDM4\_v1\_40350|ID:27157655| conserved membrane protein of unknown function [Uncultured spirochete bdmA 4]  
 MILTSLARIMSGVVSIYMLLCIVRIFFSWMPSLIDTKWGRLIARLTDPYLDLFRITLFR  
 TSAVDFTPIVALTVLSVINNFLMFTLSYAVRITFGFILSLLDAGWSAVSFLLGFFLVIVL  
 IRIIGFIARIATLHPLWQILDSDMINPLLFKVN NVIYRGRAVDYLQGLITGFVVVLLVRSL  
 GGWIVRMLTSLMLSLPF\*

>SPBDM4\_v1\_40351|ID:27157656| conserved protein of unknown function [Uncultured spirochete bdmA 4]  
 MHIGNVHIGTCGFSYDEWKGQFYPADLPAHEMLRYYSLVFSFVELDHTWYRIPNPGQLER  
 MALLTPSDFRFSCLKVHRSLTHEIDEHWQTHAAEFRTAVSALASSGRLGCVLVQLPYRFSY  
 TLENRKYLANLLSTLSDFPLVVEFRNATWYQERVFDTLRERKVG LVTIDRPDLPLGLPPES  
 VITSDICYRHLHGRNADLWWSGDATSRYEYCYSEPELKDRARLVRAMSNQAKTIFVAFN  
 NHACGNAPKNAALLQSILAEQQA\*

>SPBDM4\_v1\_40352|ID:27157657| protein of unknown function [Uncultured spirochete bdmA 4]  
 MRKPFEISTGAWWLVPDGR TIAVSSFHESWLASHPAIAGGALHTVDFVQKSGWLSVTQYS  
 DGMLEVISRDILDPRQREALRKLLEVNGGAIKKLVFVFPVIDGCLTAEAPFTADWERLSR  
 NLDAFAGKGT\*

>SPBDM4\_v1\_40353|ID:27157658| Pseudouridine synthase (modular protein) [Uncultured spirochete bdmA 4]  
 MSHFFGDIAAFAGTIFYKYNLINGGSFAPYPQFCYDTASMIPLLENDEIIVVDKPSGLA  
 AQPGEVHDDVVAVLERQLGYRPFVHRLDKGTAGCMMLAKSRQAAGKWSRFITDRDVAK  
 RYYAWVSGTPSEEKGVDAVLDGNKGAQEARTLWNLKETWNLTLTGEGSSAGGRLLVAGS  
 ELISVSLLELELKTGRMHQIRRHLAGIGLPILGDDRHGDFSVNKALRRAGVKRLMLWARE  
 LVLPAQASLPGGASILASEPPHFAAFREFLMRSGTLRQPNLSQPTPRPRRSRGLGRAGPI  
 ESTK\*

>SPBDM4\_v1\_40354|ID:27157659| Sodium/hydrogen exchanger [Uncultured spirochete bdmA 4]  
 MSPKKWLITSTIFLVCALPVFAQAETIDQTTQLTQFIFQLAEIIFAARLGGMAASAISLP  
 SVLGELVVGIIIGPYALGAI RLPGFPSGFFPMNGGEPISIILQAFS NIAAIIILFSSGLE  
 TDLDMLMRYSVAGSIVGLGGVIFSFGFGLVLG SFFTHQALFAPVNLFIGIISTATSVGIT  
 ARILSDRKKMDSPEGVTILAAAVFDDVLGIIFLAIVLGIVAVIEGKKSGSLSAGAILGIS  
 AKAFGLWLSFTA VGLVFSKQIS AFLKKIGGENHFNVLALGLAFFIAGIFEMQGLSMIIGA  
 YIVGLSLSKTEISFVIQDKTKVFYELFVPVFFVVMGMQVQISKIFEPSVLMFGLAFTVVA  
 ILAKVLGCGLPSLFLGFNKIGALRIGVGMIPRGEVALIAGIGLSSKILSSEIFSASILM  
 TILTTICAPILLNFIIDRGGRGTVKEAKSATSEEFVVDLPNNDLASLLSAYLLEDLQREG  
 FYVQLMSISDNISHIRKGDISLSLRVEGTKLVLETAPEDMPFVRTLVYETMVKLDANLDK  
 LKETYPDPAKMREEVTAIEGSRKDTSFLKILAPECIKIDMKASTKEEAIDELVGLLDSVHK  
 LKDKDKVLADILERESIMSTGMQHGIAPHARTTGVDKPVLAIGIHKQGIDFQTIDGTPA  
 HIALIASSEGDPAPHMQVLTSLGSTLGSDIVREELLHAKTREEAAKVLGL\*

>SPBDM4\_v1\_40355|ID:27157660| putative Periplasmic/7TM domain sensor diguanylate cyclase [Uncultured spirochete bdmA 4]  
 MEIIEKSNIHRWMFFVY TILQMVRKSKGFIFLFFMWIVFICPVGISAQE QIPPIINLEQI  
 SDYYFDADPALGIGEVSSPEFSSHFSVGGRP IWTGKHAPASWLRFTFPLDRLGPGYEVG  
 SDIEDRAIQWLLL VKPSFSIILDNIELYVPRPDGGFDRFVSGAQVKS NPAEPHSRYFFS  
 LPADAFKEKPCYLRISSTDLMSVELVNASLFAKNQAQSYLGYGLIFGIIIAMIYSLF  
 LLSFHYSSYIYFIFYNISIGLWLFYVQGF AKA VFGQMPGFDQAMLWVWVGQFITWGTIF  
 TISFLELQKRSRVLFYILAIAAVLGGVLVSLAGIAGLNEIAFTMSHYLGIIVPVLVIFAAV  
 LQVKRGYRVSRYFLIAWC SLASGGLMFSLMGLKVLVNVLTRNAMSIGLAFESIFLAMAL  
 ADQFKNLEVEKKKLEAAQDHFRELSLTDTLTGLRNRRYLM MELGQAMKEAFQ NREPLSLI  
 MLGIDDFKLVNDRFGHEVGDDILVSLAHSVRSCTRETDSACHYGGDALVIFMPKVAKQDA  
 LRVAERIRTHFETESLRVINGETLGATISLGIVELAGEDTIDTFLSRADAAMYKAKSRGK  
 NCSVVM\*

>SPBDM4\_v1\_40356|ID:27157661| conserved exported protein of unknown function [Uncultured spirochete bdmA 4]  
 VKKKLLVSAIIVGFVAVMFIPAQGTLP YGN SAAKADNALTIESMLTYAIQDEYLARAEY

VAIMAKFGQMPPYSNIKQAEQHIAWLKDFASLGLAIPADEAAKYVHVPSTLKEAAQTG  
VQAEIDNISMYDRFLAQPVLDRPRYAGIADLFTLRNASSNHLAAFQKQLQKY\*  
>SPBDM4\_v1\_40357|ID:27157662| putative GGDEF domain protein [Uncultured spirochete bdmA 4]  
MSIDALRMILYVASAAIGLLVIYSVIRQKSHLARYFFFVALCSFLYIFGYASELGSRLA  
NIRFWLTFEYFGLAFISSFWLLSWKLWYNHNPRFRMIVVVFVIPAITLFLVATQEYHGF  
FYKSRSLAEVEGHYLVVIEKGPWYWVQIYLFSLMSFILQWRAWRREGGAYATDSFWI  
LLGTLNLVPWILVYQLGFSPYNIDLGPFGIAVATFFIAIAVFRFGALGSEEVLLHSIFAS  
IDDAVMVLDQEGKISEFNTAAQRIFPWLDAAACVVKPVSNPNDASLFNVAQNQKIEKMVEL  
SDSRYYQKFTQIYEGRSKLGRIVFRDTTESRLLMKRLRKFANSVLTSLYNRRRFME  
RAEKALYRAQKTQENIAMLMIDVDHFKNVNDRFGHVVGDKVLSAVGRVIRRSRELGFAG  
RYGGEEFVLLQNVQRQKAMEVAEGIRKSIEGIAIEKRMISVKVTVSIGVSRCKAGESTY  
NIDELLSADRALYQAKSRGRNRVEE\*

>SPBDM4\_v1\_40358|ID:27157663| Transcriptional regulator, RpiR family [Uncultured spirochete bdmA 4]  
MSQGALDTIVAAMPTLAEKERKIAAFIQASPKALHLNISELARQAGTSPAAVRFFCKHI  
GAGKYTDFKIWLAKDVYQGWGEKYLPLELESQTPGARALHDMTEAVRRTMSALSQTLDP  
RAVEEAAERIRAAGMIAIFGVGASGLVASDLHQKLTRIGIPSSYLFDTHAQIAAACSLHP  
HDIAFIVSYSGETDEMIEVAAQAKARGSFAMTMTGPNRLRESSDLILEIPSVERIYRS  
AAELSRISQLAAIDILFNVLISHDLDSAIAALERSMQATHRF\*

>SPBDM4\_v1\_40359|ID:27157664| yfeU| putative PTS component; possibly regulatory [Uncultured spirochete bdmA 4]  
MDIHAIDDYLEHATTESRNARSANIDALPVIEILRIINEEDKGVPFVFAIEKALPDIAALVE  
DIVRAFNDGGRLVYIGAGTSGRLGVLDASECPPTFGVQPGMVVGLIAGGDAALRNSIEGA  
EDDPEGGVRALRDINFSARDVLVGITASGSAPYVLGAMQYAKDLGAAVGAISCNRESKTF  
DIVRHKILLEVGPEVITGSTRMKAGTAQKLVLNMLTTTSMIRIGKVYGNLMVDLMPVNRK  
LVERSKRLIRQATGCTKDEAEAVFLASGGKPKIAILMIALGIGAAQANALIQRGQGRLE  
AMRMYSTEKKSK\*

>SPBDM4\_v1\_40360|ID:27157665| Extracellular solute-binding protein family 1 [Uncultured spirochete bdmA 4]  
MMKLAIALLLVAMLSPLCAQQKTVSIWGWRAQDQDVWVWKGVEAALKAKGDTITIKYEVFP  
PTEYDCKLLVSLQGGVGPDIMYTRRLPGARTQALLDNGYLTALNGLVDLSNFDVAVLSFI  
SANNKVVWGVPFANQIIGIFYNKAIFDKYKLKEPQTWDELVQIAETLTKNGVTPFFVSGKE  
AWTLAMQNAMVGVSYPGDAWIGKLAAGKAKFTDPEYVNMLKDLNALKKYYQKDFMANTTA  
EQDVAFAMEQVAMIFYGVWNTNWLKTNPDFKFDYFPIPPKDKNIPAKAYTYMDGAYGLN  
NTSKNKDTALKVLNYTGTKIYGELFSSTTGEITALKGVTMPASKPILVKCYDKMVNIAAT  
NRYWVGSPFDAGTPSVYNILQEDMQSMYLDQMTPEALAKRLQDGISTWYPAFKK\*

>SPBDM4\_v1\_40361|ID:27157666| Permease component of ABC-type sugar transporter [Uncultured spirochete bdmA 4]  
VNMSAPRPILSSHARGALISHESSEVVVRKYSFLWMLFPALLLYTLFIAYPFFSSLGLSFYD  
WPGIGPKKFIGLDNYKNILSGFMASEFYRALWHNIVFFIWSLILSVVPGLFFAFLLAANI  
KGTKWLKIIFFFPNTLAIVVVGFLLWGLLLNPQWGLVNQLFRVIGLGLAKPWLGDTKTAL  
PTIIFVTAWRGLGFYILVYLAIIIGVDREMTEAARIDGATELQIAGRIILPHLYPIIATT  
SMLKFIWTFNIFDIVYAMEGTQGGPAGSTDVLTGTLFYRIAFGGLGSSQVGMGLGATVVTL  
IFFIVLPVSIFYVFIVEKRVERGE\*

>SPBDM4\_v1\_40362|ID:27157667| ABC-type sugar transport system, permease component [Uncultured spirochete bdmA 4]  
MMFRLSRFQKVIVWTFLLLLAFVNLYPIGIMILSSFKSTREIFLKPFSLPAVWRWQNYVS  
AWQRADFATYFKNSILVTAVSIASILVSSMAAYVIARFDFKFKRGIYLYLLAGLALPTR  
LAIPIFLIMRDLHLLDKLSGLIIVYTAGGIAFSVLLVNFFKKLPRDIEDSAKIDGAGA  
FRIYWQIDLPLLKPALVTVAMFNFDVWVNDFFFPLILLSSRAKKTIPGLQAFFGEYTIE  
WDVLFALNISVLPVLIIFLILSKQFIAGMTEGALK\*

>SPBDM4\_v1\_40363|ID:27157668| conserved protein of unknown function [Uncultured spirochete bdmA 4]  
MYAGYCYSLPYAQMIAYIMSQQNQNSVVIGLEHFLDDPKRQNKRYGLATNPAAITSR  
GIPSWKAFIEHSLGPACFFGPEHGFRGAAQDAVQLDDENFKGIPAYSLYGKRLKPERWML  
EPLDAVVFDMDQDVGCRYYTFLYTLAYIMEVCEKVGTPIVLDLDRPNPIDGVKVEGSPSSH  
IESFVGGYGLPPRYGMTIGEFALYLKGEYYPGVPLEVVRLSGWDSRQAWAETGLPWPLPS

PNLPTLSCAELYPGTCLAEGTWLSEGRGTSRPFEEIIGAPFIDGEDLREQLSALNLSGVVF  
MSLFFTPNASKHQGELCEGVLLSVIDRHA VRSLDTGIAVIHTIHRMYPHEFRWREDWDDP  
ALTFFDKLAGGTELRYMIGKGASLDECLAFEHQGEDKFLALRGKYLLYGEGKR\*  
>SPBDM4\_v1\_40364|ID:27157669| putative Beta-lactamase [Uncultured spirochete bdmA 4]  
MPSLTPLEALLEEAISQNLCTGAAGAVVVEGKTLWSYCSGKTGEEETPLQEGEGIEVLAR  
TSPAPITFQTRFDAASLTKPLSTALLTLKALQAGALNDDTIKKFLPALNQRTGEIPLIA  
LLTHTGGMPAIPALQRYFPDPAHLDRDVAFSRLSFIEPESPAGRHMYSCTGYMLLGAVL  
ERISGMLIGRLFQQEIAGPLNLPRATFAQGTLASGEPVPLENTVETEFPCWRKKRMRGQV  
HDESAYCLGGHSGNAGLFLSLEDALILGNLILQEGAHNGKQIFKPEIMQLLQREHTRGLE  
ERRTIGFRLHDNDTADGPLWPAQAFGHTGFTGTSIFFEPKRLLAILFTNRVYYGRDATA  
DAIVAFRRRAFHTKVWHVFS\*

>SPBDM4\_v1\_40365|ID:27157670| conserved protein of unknown function [Uncultured spirochete bdmA 4]  
MNQQWIFGIDGGGTSTRLRVEGLARELLYQAEGPSLNPRSVGWNGSRKTLLEGLFSAMYEK  
TGLDTDNCMSGFAGVAGIDRSEDGTMRSIIRDAEELGPDNTVEVRNDSIPALAGAFGEL  
RGILLIAGTGSIAVGADGAGRIIRSGGWGHILGDEGSAYWVGLRALNAATRFHDRRSPQT  
DLLGRALAYFGEKEPFLIPAVYEPFDKSKIAAFARIVAEERDRGDEVAEQIFKDASEEL  
ALLVISVATRLGEAQAGGRIAFAGGFLANNERLWHDTEARILAVLPRHRIVLPEADAANG  
ACLLALINAGQKSRN\*

>SPBDM4\_v1\_40366|ID:27157671| conserved membrane protein of unknown function [Uncultured spirochete bdmA 4]

MKQRQPAATLFGVIVAVIWGMTFLSIKVALREFGPMSLSLFRFIIASVLIALVMLITRVD  
FRVAWRDVPLLSLSSLVGVTLTYFYFENNGILRLTASESSIIVGAIPVVTLGGEIVLYRVR  
PHRLVILGIVLSFLGVALIVRSESATGSPLGYLFMGGAVLSWAA YGFITKPLSGRYPML  
TITFWQMVIGAIGCIPFAIVERQVWTGLSATALLNAAYLGIFGSAIGYWL YVIVLEHLGP  
GRSSVFINLIPVVSVAASYVVLGERLNPLQIIGAIITGVYLASSGI\*

>SPBDM4\_v1\_40367|ID:27157672|hutH| Histidine ammonia-lyase [Uncultured spirochete bdmA 4]  
MNEVVIDGCSLSIAELVAVARRRILVRLDPDAEERMLASRKVELAVKKKQIKYGITTGF  
GKFCNVIIEEDNALLQKNLIMSHACGQGEFPAEIVRAMMVLARANALAVGNSGVRPLVV  
QHILRLVNADVVPVPEKGS LGASGDLAPLAHIALVLIGMGEAVYKGNRMAGALALAEAH  
IPPLVLEPKEGLALINGTQAMTAIGALAVYDALMLYRSATIASAMTFQALRGITEALDPR  
IHELRRQKAQIEAAKDLRRLLEDSLLTTKPSGTRVQDAYALRCTPQVHGACLA AIQH VWD  
VIAAELNAVTDNPLIFPHVLREGGDILSGGNFHGEP LALALDYLGIAASELADISERRLE  
RMVNPALSEGLPAFLTINGGLNSGFMIVQYSAASLVSENKVL SHPASVDSIPSSANQEDH  
VSMGTIAARKARQIIDNAGRVAAMETLAACQALDLRAIQLGLPTIENSLSPATIPIYRTV  
RAAVRFTDQDRTMYPDIDAVVSLNDKTLAQGMDRWSWNPEPVAPCED\*

>SPBDM4\_v1\_40368|ID:27157673| conserved protein of unknown function [Uncultured spirochete bdmA 4]

MVTKRDHGIHLDRTSQQERSRLISYINIKLQSLGLPVYSKEGTGFVQLAADMLEFRQKD  
RLLPRILPPADQRIQNFIDRYLADLGLARVPQMPANTLVLD RYGMARELSLPPDGHKHVS  
PTLTSYRVRNGVLHNPKNDRRTTEGVFHIVEGGLPIPPDKK VVPKLTFAKILEVALNPPA  
ELLEVPFTAGENDKAHTFVS VLLRPVIRPEIPGYCEERSMEV RFFAPGSLVANVDFVESI  
FGNSGDPFIPENDASIDPVHWTGTTGCILATHLTEITKKEVGLPHWDQATERQRRDGM C  
WREPTEKYNDGRAFKLTARDESGVIITVIADNYFGYSKKEIKSHISYSANLLGLGEEHA  
GGALVFPSYNLGTRFVPDTNLKSKGHSLHDVYTIMRGRIEMKDEGYAVDLTFPNIIYLPD  
DAYISLEDQKAHWVSNGREESLRTLPGNIYVHPTGYRVHMERHPASGAWRLIGASAEGLL  
CHKPCTVSGGGKSEIAKSIHDAITYMPIIADFEKDMKAVKEI IENDYGNRFRDESENHG  
KDARPVLSPKRSLGSLVVKLLSPSPAYNDEYNEWLRSIPERIKSLVFLVKRFYQPDWGD TW  
ASHFSVDAVNGTTGNILQFEGRPIMGSYLRVVGKSEKGMNRRFFKLRQDFMPAFKLQWEDDI  
SASIIVPVDQLEDLPEWASNHL SLKFAKNCEARFFQRPDDAIIRGYDKQTEKDLSRQDNY  
ISNFEPLTRSDAAHIIENTVHFYEYTDPMRKFIEETEKDPNYEYFVASNCFRLVDGAPSK  
NPRYLQLDPTYVNPEARYLAELGPRLYRRIPADKPLPQPIGAVLPGRRNPPDPKAGIRS  
LAVYGPPIHYQELPELFMDFVCSLTGKSPSTTGAGSEGALTKGPFNALVPTSDLNALLGF  
ILTGYSGFTTAAGHIGHKYKMDHDISLMMPELWARLGPEERDPEFLKSHGYLEKVD DFKY  
KGKLIPASRLGWITPLFAATYLGRLFDTPSVVFPDDMLRPELQSLEEFVDGIENIAAAM  
EKSAKAYFEDGSYEAAPPLKAVLSVMA YGNYEGKSIQDPEVRKFFDREYVLASDWYKAR

LEHYREHEIA YIESSISYLKFLAERAEPKSLTERRVQ AELSSAHARLEQLMAPNYLKRI  
WGSIGLDPLYKQAKV\*

>SPBDM4\_v1\_40369|ID:27157674| Dopamine beta hydroxylase-related protein, containing doMON domain (fragment) [Uncultured spirochete bdmA 4]

MKMKAFSTALVLLV LASVPAVFAVNVDGTIASGEYSKQAVFDKGNFKLLWFEFEGDKVFMA  
IVAKTPGWVAIGFNPSTVMAKSDMVLGLVKDQSDVQAVDEWSSGIFGPHAPDVKGGKSD  
ILSYAGTRTDDTVVFEFSRLNTGDQLDKVIPTSGKFKVIWAYGPSLDVTAHKHKAGSAT  
IQMEGQK\*

>SPBDM4\_v1\_40370|ID:27157675| membrane protein of unknown function [Uncultured spirochete bdmA 4]  
VSLLPFHVVS MGLAFLSMISAIVIARYFKTKKWWLKAHRVNLNIGAVIFAVAGLVFALLMV  
SSTGGPHIRVPHAVIGAVTLVLLVVM PFLGSAIFKTKDKKAIQNLKKT HRHMGRITALML  
TVTVAAGLTLAGIL\*

>SPBDM4\_v1\_40371|ID:27157676|hutI| Imidazolonepropionase [Uncultured spirochete bdmA 4]  
MQEKNTTSYFIHNINELWTP EGQRAAAGAAMQKIKKVHGACIYVKDGRIAWVGEEARLRA  
SDAVIAREALSATFYNAEGRSCVPGFVDSHTHFIFAGWREDEFFWRAQGLPYMELHRRGG  
GIQNSVQATR GASLEDLILLGRKRLATMLSLGITTVEGKSGYGLDVETEIRQLLAMRALS  
RAGAPDIPTFLGAHSVPPEFKGRPRA YLSFLAEVLPVKSEKLAHFVDIFCEEVFGI  
EDSRWYLERARAAGFALKLHADEVDPLGGTALAAELGAISADHLLKASNDHIAALAASGT  
IACLLPLTAFNLREPCASGRRFIDAGCAVALASDLNPGSCYSQSIPLIFALAVLYMDMTI  
EEALTALTLNGAAALELAPRTGTLEPGKDADFLLDAPSPAHLAYHAGMNLVHTVFKRGA  
SVWQNGNMLEMEKMQSAGLSLS\*

>SPBDM4\_v1\_40372|ID:27157677|rpI| 50S ribosomal subunit protein L17 [Uncultured spirochete bdmA 4]  
MKHKIGYNKLN RVAAHRKALIRNMVTVLLKEEKIVTTKAKAIEARRAAEKLITRAKVDSV  
HNRRIASARLYGEDAVAKLFT EIGPRFKERGGGYTRILKLGDRANDAASLVLELVDQKA  
DEKRAEREKRKAQRKAKKQA\*

>SPBDM4\_v1\_40373|ID:27157678|rpoA| DNA-directed RNA polymerase subunit alpha [Uncultured spirochete bdmA 4]

MARKSLLKGFKRPKGITYEQSESTDTY GKFVA YPFEPGYGTTVGNTLRRILLSSIQGYAI  
TAVRITRYDDEGVPHVITSEFETIPGVVEDTIEVLN NLKLRRLRPN DKEELTDYEIRG  
IEELRGSFFAEQGLSVLNPDLKIASFEPSVHLGLELQVNLGRGYVPSEVNEKYIDVVG T  
IPMDAIFTPVTRVKYSIEPTRV GQRSYDKLILEISTDGTIRPEDALGEAGKIAKDHFSI  
FVNFDENEAGGEETSDEIEERVRQILNMPVEEELS VRSFNCLKNANIRTIGDLTKKTEE  
EITKTRNFGKNSLQEIKTKLAEWNLTLGMADYSALRNHIKLN MKKEESDEA\*

>SPBDM4\_v1\_40374|ID:27157679|rpsD| 30S ribosomal subunit protein S4 [Uncultured spirochete bdmA 4]  
MARYTGPVCRLCRAEGRKFLKGERCRSDKCPINKKRLPPGKAPKTRIGKKSEYAVQLRE  
KQTLKRNYGLMERQFRNTFEKALGLPGKTGDNL IILLERRLDNVVYRLHFATSRAQARQL  
VNHGHVAVNGKRVNIASFLVKAGDVVS VIGAAKKMDSIRQALEEVQKSGVMPWLEVNADE  
MTGRYVTNPQRQDVTDTLDIKEQLVVELYSK\*

>SPBDM4\_v1\_40375|ID:27157680|rpsK| 30S ribosomal subunit protein S11 [Uncultured spirochete bdmA 4]  
VAASTTKTKRKEKKSVEYEGNVYIQATFNNTIVTVTDLNGNAISWSSSGSHEFRGAKKST  
PFAAQTVTEAAVQKAMQAGLREHVYVKGP GIGRESAIRQLGVMGLKVK SINDVTPIPHN  
GCRPRKARRI\*

>SPBDM4\_v1\_40376|ID:27157681|rpsM| 30S ribosomal subunit protein S13 [Uncultured spirochete bdmA 4]  
MARIAGVDLP NKHVDIALTYIYGIGRSSALQICETT GIDPDKRMNDLTNEEINELRKVIE  
SDYKVEGRLRTEIALNIKRLMDIGCYRGLRHRRGLPVRGQRTRTNARTRKGK RKT VANKK  
KAV\*

>SPBDM4\_v1\_40377|ID:27157682|secY| preprotein translocase membrane subunit [Uncultured spirochete bdmA 4]  
MAGTLVDIFRVKELKDRIFFTLFWLAVFRLGTFLPIPGINASALQSYFANQSTANTGITD  
YLDFFAGGAFKNFSLFMMGVMPYISAQIIMQLLIVIFPKLKSVAEEEGGRRKISRWTRIG  
TIVIAVIQSFSVTWADRI PNAIAMSNTLYTFVAILVT TGT MFLVWIGE QITKRGIGN  
GVSLIFAGIVARLPNATFELIKKIQIGEINAVYAI VVLMFVAVVALVVLEQQGQRKIP  
VNYAKRIVGRRMYGAQNTYIPFKINPSGVIPVIFASSILTFPLQIAQSFGVQAKWLRDFS  
YWL RPNGFWYNFLYVVFIFFAFYFTQVTLNPQEISKNIRENGGSIPGIRSDKMEEYLT K  
VLNRIILPGALYLGLIALIPTLVQRLFNFPSQMA YLLGGTSL LILVGVLDLDTMAQVEAIL

KMHHDGLVRKGHRSRNL\*

>SPBDM4\_v1\_40378|ID:27157683|rp1O| 50S ribosomal subunit protein L15 [Uncultured spirochete bdmA 4]  
MADFNLHAPEGANRKKHIVGRGDGSGSGGTAGRGNKGQQSRSGGKTYPGFEGGQMPLYRR  
LPSRGFSNYPFRKEYQVVNLRDIEGKFQAGDVTVDVSLFMKGLVRKPELPVKVLGEGQVS  
VALTVSVDAVSSSAKAKIEAAGGKVEVPAATGSSADA\*

>SPBDM4\_v1\_40379|ID:27157684|rpmD| 50S ribosomal subunit protein L30 [Uncultured spirochete bdmA 4]  
MARIQITLVRSTIGQPKARATVRCLGLRKIGSSTIQEASPQILGMVNVKVRHLVEAKEVE  
\*

>SPBDM4\_v1\_40380|ID:27157685|rpsE| 30S ribosomal subunit protein S5 [Uncultured spirochete bdmA 4]  
VERTRRDDSGVQDGYTEKLIQLNRTAKVVKGGRRFSFALTVVGDQGHVGFVGFKANDV  
TEAIRKSVERAKQAMVTPVVKKGTLPHEVTGKYKATTVYIKPACPGSGVIAGGPVRAILE  
CAGYVDIISKCVGSRTSVNVVRAVFSGLGQLLDAQEVAKNRGKALKDMWS\*

>SPBDM4\_v1\_40381|ID:27157686|rp1R| 50S ribosomal protein L18 [Uncultured spirochete bdmA 4]  
MSVRELSDKIRKREKRRTHIRKTITGAAEKPRMSVFRSNLHLYVQVIDDMSGHTLASVST  
MEQQFRSLKPTIQTGSMIGEELGKRLLLEKGITQVVFDNRNGYKYHGVKAIADGVRKAGIK  
F\*

>SPBDM4\_v1\_40382|ID:27157687|rp1F| 50S ribosomal protein L6 [Uncultured spirochete bdmA 4]  
MSRIGTRPVVIPQGVKVTVEPTVFHVEGPKGRLSQEYRPEVQIAVKDGIADVVERKNDKSKQ  
AKAYHGLYRSLDNMVTGVSQGFKRALVVSQGVGYRVEVQGNLLVLSIGYSTDVVAVIPEG  
LKVSVEQNGQKIVIEGIDYAKVVGKFASEVRSREPEPYKKGKIRYEEEEKIRKRVGKTGVK  
\*

>SPBDM4\_v1\_40383|ID:27157688|rpsH| 30S ribosomal subunit protein S8 [Uncultured spirochete bdmA 4]  
MSVSDPIADMLTKIRNANVARHEKVDIPTSKLLEIVKILKTEGYIKNFKKIQTGQNF  
RIFLKYDEENSPIIHGLSKVSKPGRRVYTYGEMPRIFNGYGMIIISTSDGVITGRKAVE  
KQVGGELICTVW\*

>SPBDM4\_v1\_40384|ID:27157689|rp1E| 50S ribosomal subunit protein L5 [Uncultured spirochete bdmA 4]  
MAQTKVYIPRLKKLYREKVSPELSELYASKMQVPRLVKVIVSMGVGEARENKKMLDAA  
ITDIETITGQHAVKTKAKKSIANFKIRKQDEIGARVTLRGDQMWFLDRLMNVALPRVKD  
FRGVNPNNGFDGHGNYTLGLTEQIIFPEIDFDKIEKVMGLSVSIVTTAETDMEAKSLLAKL  
GMPFRK\*

>SPBDM4\_v1\_40385|ID:27157690|rp1X| 50S ribosomal protein L24 [Uncultured spirochete bdmA 4]  
MANAKYKLRKEDLVQVVAGKDRGKQKILRIDHEKSRVIVSGINMVKKAMKKKSQTRGG  
IVEIEAPVHISNLMIVCKKCNKPV RAGYKIIDGQKKRVCRKCGEVL\*

>SPBDM4\_v1\_40386|ID:27157691|rp1N| 50S ribosomal protein L14 [Uncultured spirochete bdmA 4]  
MIQVESMLNVADNSGAKTVQCIKVLGGTRRRYASVGDITVVAVKTALPNSAIRKGSVEKA  
VVVRTHKEYKRPDGSYIRFDDNACVIIDANKNPKGKRIFGPVARELREKDYMKIISLAPE  
VL\*

>SPBDM4\_v1\_40387|ID:27157692| protein of unknown function [Uncultured spirochete bdmA 4]  
MCFVVLVVGfYTLRPIHILSVKGMELAHDFDNDGFILVRNYDALKNKLALSHFLDIRI  
HLPSPEELCLLRGAAALGLGDPRFDPRDLAAKISLLERILDVPDHHLESKVIFLSKLI  
LDEHLVQLYIFK\*

>SPBDM4\_v1\_40388|ID:27157693|rp1P| 50S ribosomal subunit protein L16 [Uncultured spirochete bdmA 4]  
MLLPKRVKHRKQQRGRIHGEAHSNAIAFGDYGLVSLEPHWITNRQIEAARIALNRYIKR  
GGKMWIRIFDPKPYSKPAETRMGRGKPGPEYVAVVKPGTVL FELSGVEPKVAEEAMRL  
AGSKLPVKTFAVREEME\*

>SPBDM4\_v1\_40389|ID:27157694|rpsC| 30S ribosomal subunit protein S3 [Uncultured spirochete bdmA 4]  
VGQKVNPIGLRIGINKDWSHWYVEPREYAKTLHEDLAIRRRLLDLPETKGADISEIEII  
RHPQRVTIVIHSARPGVLIGTKGVNIDKIGAEIQKITQRKLQIKIKEIKKIDTNSQIVAQ  
NIARQLENRQSFRRSMKSAIQNALKAGAQQCKVRLSGRLGGADMSRTEELKEGRIPLHTL  
RADIDYGF AEADTTFGKIGVKVWYQGMVYAQDKNEDAGQLAKRARREPAGEARGEHREG  
GQERHERRERGERGERRATPRPEADRAEGEARS\*

>SPBDM4\_v1\_40390|ID:27157695|rp1V| 50S ribosomal subunit protein L22 [Uncultured spirochete bdmA 4]  
MANTKTGFRATSKWLIASPFKVRPVADLVRAPKPYTEAMAILNMPHKGAKLIRKVVSSAA  
ANALNKNRKLGEDMLYIKELRIDEGRPLKRIWFRARGRADMQLRRMCHISCIVDEIGKKT

EA\*

>SPBDM4\_v1\_40391|ID:27157696|rpsS| 30S ribosomal subunit protein S19 [Uncultured spirochete bdmA 4]  
VSRSVKKGPFIEKSLYKKVTEMSRAGDKKLIKTYSRSTIIPPEMVGQTISVYNGKTWVPV  
YVTENLVGHKLGEFAVTRIFRGHAGSDKKAEEK\*

>SPBDM4\_v1\_40392|ID:27157697|rplB| 50S ribosomal subunit protein L2 [Uncultured spirochete bdmA 4]  
MAIKTFRPVTPGLRHRVQVISGELTSNESQPVKSLTVGKRSTGGRASNGRISVRHHGGGH  
KRKYRIIDFKRDKFGVPGKVSIGIEYDPNRSANIALITYVDGEKRYILSPKGLRVGQTILS  
GPEAAPEVGNALPLEKIPVGFTVHVELTLGRGGQLARSAGVSALIAAKEGDYVVLKLP  
GEQRMVFKKCMATVGQVGNDEHMNERIGKAGRTRWLGIRPTVRGTVMNPVDHPHGGGEGK  
GKGYKQVSPWGQPAKGYKTRDTHKPSGRFIVKRRK\*

>SPBDM4\_v1\_40393|ID:27157698|rplW| 50S ribosomal protein L23 [Uncultured spirochete bdmA 4]  
MEYDAILIEPVLESESNIMREFGQYIFKVDSTRATKPMIMEAVAKTFNVHPVSCCKVINVTS  
KPKRLRGRPGRTAEWKKAIIVRLQKGETIRVFEGA\*

>SPBDM4\_v1\_40394|ID:27157699|rplD| 50S ribosomal protein L4 [Uncultured spirochete bdmA 4]  
MEGKVISLSGKEPRKIELSDAVFGLPINEDVIWYAVNNELANARVGTASTKDRGEVHG  
RKPFAQKGGGRSRHGDLSNIYVGGGVSGFPKPRDYSYSIPRKEKQLSLKILSLKVQDG  
LVSIIEDFTVESGKTKDLLKVLANVVDLKNPERTVLILKDDDDPMVKRAARNIPWLG  
YLTYNRLRAHDLFYARRVVMLEGASAKLNEFYAGVTKES\*

>SPBDM4\_v1\_40395|ID:27157700|rplC| 50S ribosomal subunit protein L3 [Uncultured spirochete bdmA 4]  
MIGVIGKKVGMTQIFDETGRVVPVTVVQVVPNVVVSCKTAEKDGYNVAVVGVYEKKKSRV  
TKPYAGQFPEGLAPTKIFREFRDFEKEVEVGQAIDASVLDGVRFDVVARSKGKGFQGVV  
KRWGFEGGRATHGSKFHREPGSTGNSTYPHHTFKNVKMPGHMGNERTVQNLKVIRVDAE  
KGVVLRGALPGPRNCDVVIRKSVKKS\*

>SPBDM4\_v1\_40396|ID:27157701|rpsJ| 30S ribosomal subunit protein S10 [Uncultured spirochete bdmA 4]  
MKDRIRVRLRGFDVRLVDDSAKSIIKTQVQVAGSKVSGPVPLPTRINKFTVLRSPHVHKKS  
REQFEMRTHKRLIDIIPTPEVMDALMKLELPSGIDVEIKQ\*

>SPBDM4\_v1\_40397|ID:27157702|tufA| protein chain elongation factor EF-Tu (duplicate of tufB) [Uncultured spirochete bdmA 4]

MAKEKFERTKPHMNVGTIGHIDHGKTTLSAAITMYCGRKFGDKVLKYEDIDNAPEEKARG  
ITINTRHLEYQSAKRHYAHIDCPGHADYIKNMITGAAQMDGAILVVSAPDSVMPQTREHV  
LLARQVGVPAILVYLNKVDLVDPELDDIVEEEVRDLLNFYGFPGDKTPIIRGSFAFKAMT  
EPDNPEATKSIQELLDAMDSFFPDPERAIDKPFMPIEDVFSISGRGTVVTGRVDRGV  
VNDQVEIVGIKPTKTTVVTGVEMFNKLLDEGQAGDNIGTLLRGIDKKEVERGQVLAKPGT  
ITPHTQFKGQIYCLSKEEGGRHSPFFSGYRPFYFRTTDITGTVKLPEGKDMVMPGDNSE  
IEVELIYPIAMEKGLKFAIREGGHTVASGQVIEVIA\*

>SPBDM4\_v1\_40398|ID:27157703| protein of unknown function [Uncultured spirochete bdmA 4]  
MNKLQRPSGNINATGCYAINYLFLGLSDYKQRIKIAQ\*

>SPBDM4\_v1\_40399|ID:27157704| putative Elongation factor G 2 [Uncultured spirochete bdmA 4]  
LARRKYTDIVMDSAHASGSGSPFPIRNIGILAHIDAGKTSITERVLHVAGVREQAGNVDE  
GTTATDYLSVERQHGITIKTAAVRFHLKGVRFHLLDTPGHVDFSAEVDRVLRVLDGAVIV  
LCAVSGVQVRTGFASGCRAHKIPRMFYFINKMDRRGADFFGALQEIAGELGEPVLP  
LQIPTFEDYLWNGIADLVEMCWYPSSLDRTARSAAESDIADAPETRALPIEKAPL  
TEESRRLIAEYREKLLDRASMYDDNLMEKIVDGKAVSSGEIRAALRAPIHRQELAPALCGSSFS  
DISSALLLDATIDYLPDPLVRGCPKADVKSAREVRLKAESGAPFSAYIFKTVLSADLNALAWI  
RVWSGTIREGMKVMAMPAKLLTHIQHLYGINGAEIEPVQDAAAGEIVGARLSYMEAGGTL  
CEPGLQIVYESFKNPEPLVSIAVEPASQQELSKLRDALKRFSLEDVSLIDEKETGRIT  
ISGQGELHLDIVLERLQKEYGLRVRAGNPQVPKVERLKKSVRFGDEFVGDGGEKLSVAL  
RVSLENQKDKDENSLLASGIRMSLNYETSIRRAMETVLA VGPTGGWPVIGVKA  
VIESFVPPWSTDKRAETAVEAAASSILRRVSLAGSFVLVPIVQISVEVPDTWFGAALATLQARGA  
RIESVEDAGGIKSIAYAPMENLFGYATSLRSLTEGRGIYQAKFDHYGSALEY\*

>SPBDM4\_v1\_40400|ID:27157705|rpsG| 30S ribosomal subunit protein S7 [Uncultured spirochete bdmA 4]  
MGRKKKSIDRGHAPDVKYNSTTISRFIGRMMWQGGKSVCTGIMYDALELLQQRSGQPALD  
AFSKALENVKPTIEVKSRVGGATYQVPIEIRESRREALAMRWIIGAARARTGKPMSECL  
ADELFDANSTGTAIKKKDDMHKMAEANKAFAHYRW\*



>SPBDM4\_v1\_40401|ID:27157706|rpoC| RNA polymerase, beta prime subunit [Uncultured spirochete bdmA 4]  
MRDIQDFDNISIH LASPEMIRAWSYGEVKKPETINYRTLPERDGLFCERIFGTTKEWEC  
YCGKFKSIRYKGVICDRCGVEVTNSKVRERMGHIELASPVSHIWFYRSVPSRMGLLLNL  
PMATLKSVLYYEKYVIDPGETDLKKMQLLTDEEYREAMDRYGG AFTAGMGAEAIRSLLE  
QIDLDRLSQELRQKMIERGAKSDKRLLKRIELVESFRSSGNRPEWMILTVIPVIPPELRP  
MVQLDGGRFATSDLNDLYRRVINRNNRLKLLQLNAPDIIIFNEKRMLQEAVDALFDNTR  
RRRAVKGAGNRPLKSLADMLK GKQGRFRQNLGKRV DYSGRSVIVVGP ELKMWQCGLPTK  
MALELFKPFIMKKLVEKD VVYNIKKAKMLVESETPEVFAVLDEVVKEHPVLLNRAPT LHR  
LGIQAFEP LLVEGKAIKLHPLVCKAYNADFDGDQMAVHVPLTHAAQAECWTLMLSSRNLL  
DPASGKTIVYPSQDMVLGINFLSRHRPGVRGEGKRYSTSD ELLACEYGSCDYQALVYVP  
VPKEPVWDGYHKL PVLNDSGLIKTTAGRILLNEAMPKEVPYINYALTDKDIRLLIEHVYR  
ANGPFITVNMLDTIKEMGFKYATFFGATIGMDDIVIPKEKTE MIEKANKEVEAIQQQYLA  
GHITQDERYNRVVEVW SKTNEELTAVMMKTLEKDRDGFNNIYMMAHSGARGSKNQIRQLA  
GMRGLMAKPSGDIIELP IRSNFREGLSVIEFFISTNGARKGLADTALKTADAGYLTRRLV  
DIAQDVVVNDDDCGTINGAVHTAIKDGDEIIESLRERIIGRFTLDPIRHPITGQIIVGSN  
EEITEEVAEQIETSGIEEVSVRTVLTCEAEHGVC RKCYGRNLATGKTVEIGEAVGIIAAQ  
SIGQPGTQLTMRTFHIGGAATKAAEENRISLHYSVYIAEIEGSYVKTDPGHL LFTRRGYI  
YVNRVFGAFDLAQGDVLLVEDGQRMKDDPVIRITDGTEVKSPSISYAKVLEGKVL LIAQ  
EQKVEIRNGSDMVVTRGQILLANETIATFDPFNDPII SEHDGIVRYEDIVPGSTLKEEIN  
AETGNVEKIITDVG SERDTKEPRIIVTDEAGNDIETY YLPEGAYVNVEDGENVHAGKILA  
KILKESAKAMDITGGLPRVGELFEARKPKTPAVLAMVSGTVSFGGSLKGKR VVNIRDSFG  
KTYKHLVAKNRLLVRNGDKVVAGELLCDGSKNPHDILAILGEQACQRYLMDEVQQVYRA  
QGV TINDKHIGVIIRQMMKKVEIVNPGDTVFIY GQQVDKHRFHEENRRVMKEGGQAAVAR  
PILLGITRASLKIDSFFAAASFQETTRVLTDAAIKGEIDQLRGLKENVIIGHLIPAGTGM  
KQYRQVKLFDAENDDLNALVDEVIEKRKQES ELAPPAILQDRTSSEVSFDEPSVFDNDEG  
FSEDAGPSEE\*

>SPBDM4\_v1\_40402|ID:27157707|rpoB| DNA-directed RNA polymerase subunit beta [Uncultured spirochete bdmA 4]  
MAYTEQKIKRTYIGKDYRDVMDIPDLIDIQLSSYERFLQRDKLRKGESLDQNGLEEVFRT  
TFPIESPSGDLVIEYERYSLDEKAIKYSELECKQKGLTYSVPLKAVINLVFKKTGEIRQK  
EIYLGDIPLMTDRGTFIINGAERVIVSQIHRSPGVVFSHEKGVFSSRIIPYRGSWLEFEI  
DQKHDLIAKIDRKRKILGTMFLRAIGFQSREEIIA FYTTKEVILSENQAEKDALVGKI  
LAKAVYIELDGEQKRLFRAGDKIHLHEIDELINL GIDVVEVIDFEDEKSLHNEMILNCFD  
REDVKLVKETPDQDEPTKEDAISAVYSVLRPGEPISMENAERDLHNMFFTARQYDLGAVG  
RYKLNKKFDFDSKTNTLTKDDIVATMKHLINVYYGEANIDDIDHLGNRRVRAVGELLSNV  
MKVAFSRMERTAKDRMTGKDLETAKPQDLITIKPIVAAIKEFFGTSQLSQFMDQVNPLAE  
LTHKRRNLALGPGGLNRDRAGFEVRDVHYTHYGRMCPIETPEGPNIGLIVSLATYTTVND  
YGFLETPYRKVKNGMVTDDIEYLSAIDEDKYVVAQASARIDKQ GKFLDQSSISCRHQGDYT  
MRTPGEIQYMDVSPKQIISVSAALIPFLEHDDANRALMGSNMQRQAVPLVFTEPPRIGTG  
MEWKTAYDSGVLVKAKRAGSVEYVDATRIVIRPEKPESPDDADVQLIKYQR TNQDTCFN  
HRPIVKRGEEVLKGQVIADGPATSQGELALGRN ILAGFVPWNGYNYEDAILISERVVKED  
LFTSIHIKEFILEVRDTKLGP ERITRDIPNTSEKMLDNLDGEGVVRIGAKVKSGDILVGK  
VTPKSDSDTTPEFKLLNSIFGEKAKDVRDSSLR VPHGIEGTVIDVQRMSRANNDLAPGV  
EETVKVLVAVKRKLKEGDKMAGRHNKGVVARVLPVEDMPYMEDGTPLDICLNPLGVPSR  
MNIGQIMETELGWAAS TLNEWYACHVFQSPSQEQIEEKL RQAGLPVSSKVMARDGKSGEF  
FKNPITVG VVYFLKLHHLVDDKM HARSTGPYSLVTQQPLGGKAQFGGQRLGEME VWALEA  
YGAANTLQELLTIKSDDMTGRSKVYEAI VKGEPHTAAGIPEAFNVMVQELRGLALDIKVY  
DSKGRQLALTERDEDIKKQSGAF\*

>SPBDM4\_v1\_40403|ID:27157708| protein of unknown function [Uncultured spirochete bdmA 4]  
VPPFSGCIQRGFSRECLLMTKMLEALRPIALSARTFDPRVQAHMEG\*

>SPBDM4\_v1\_40404|ID:27157709|rpL| 50S ribosomal subunit protein L7/L12 [Uncultured spirochete bdmA 4]  
MAALTKEQIIDAIASMTVLEISDLVKAMEEKFGV TAAAPVAVAAAPASGAAAAPAEKTE  
FTVVLKGNVPADKKIAIIEKVRVITGLGLKEAKDLVEAGDKPIKENVSKEEAEKVKKQIE  
AAGGSVEVK\*

>SPBDM4\_v1\_40405|ID:27157710|rpI| 50S ribosomal protein L10 [Uncultured spirochete bdmA 4]  
MAIKASKIQPKKVEAIGMLKEMISGSNDFIFTEYRGLTVERITALRHQLREKGVELHVIK  
NNFARLAFEELGYSDAVEPVLRGPTAVAFVKTDSNEVAKILLDFAKETPSLVVKGAMVDR  
QFMDSKQIEAFSKLPGRSqliamLMSAMQAPAQNLVYVINAIPTKLVRVLKAIIEKKAQS  
GAN\*

>SPBDM4\_v1\_40406|ID:27157711|rpIA| 50S ribosomal subunit protein L1 [Uncultured spirochete bdmA 4]  
MKHGKKYNEVAKKVDPSQAYELGAACALVKELKTAKFDETVVHIRLNLKKSQSVRDTV  
LPNQFRAEKRILVFCKPERVKEALDAGAAAYAGSDEYIEKIKGGWLDLFDIAVATPDMMKDV  
GKLGMLVLRGRLMPNPKTGTVTSDLSAALGELRKGRTYRTDKSGIIHLPVGKVSMDAEK  
IAENLGILMEEINRKRPAKAGDFVASVYLTPTMGPSVKVALNKSEKR\*

>SPBDM4\_v1\_40407|ID:27157712|rpIK| 50S ribosomal protein L11 [Uncultured spirochete bdmA 4]  
MAKKKITAIVKLQCPAGKATPAPPVGPALGPHGVSAPMFCQQFNERTKSMEPGLVIPAI  
TIYQDKTFTFILKTPPASVLIKKACGIEKGSLLPQKDKVAKLSKTKLEEIAKQKLPDLNA  
NDLEAAKRIIAGTARSMGVEVEW\*

>SPBDM4\_v1\_40408|ID:27157713|nusG| transcription termination factor [Uncultured spirochete bdmA 4]  
MAKSWYILHVYSGYENKIEKTIRMLIDSNELSRDIVTDVKVPAEEVSEVKEGKKRTVSRK  
ILPGYILVEMDLPENGWKATCAVIRNITGVTGFVGSAAANVRPQPITMEEVKRILQRTGEL  
KGERPVHFRQTFVAVGEQVKITQGPFFESFSGVIDEVNAEKNRLKVSQIFGRSTPVEVDMA  
QVEKI\*

>SPBDM4\_v1\_40409|ID:27157714|secE| Protein translocase subunit SecE [Uncultured spirochete bdmA 4]  
MKKIIQFFKDCYAELSKVVWPSKDDVIASTKIVVISTVAVALVLGLIDFLIVLGLIEVVFR  
\*

>SPBDM4\_v1\_40410|ID:27157715|rpmG| 50S ribosomal protein L33 [Uncultured spirochete bdmA 4]  
MGAMASKKKQNVIIALQCTECKRRNYTTKKNRKTQDKLELMKYCKWDRKHTLHKETKV  
K\*

>SPBDM4\_v1\_40411|ID:27157716|murJ| Protein MurJ homolog [Uncultured spirochete bdmA 4]  
MASHNPEDPIEPVELSGEPVYPADEPVELMEESSKVAADIAAEKAARSSAKMMRSAGVLS  
FLTISRVLGLVREMTKARFLGTGIYSDAFTVSFIIPNFMRRLLFAEGSVTVAFIPTYKGY  
LHAQNDKETHDFLSASLTVLTICVAVVALGIAFAPTIVKLFGSDPVETTILTRIMFPFL  
ALVSFAALLQGILNSHEIFGPSGFAPILFNICFIVVPWL VGNRLGNPARAMAVGVVIGGL  
AQALVQLPAVIRLGTGLGFMNPARAFRNPGRKVFALIAPTILGMAAYQVNDLVSTAFAS  
RAGTGVASSLQYSLRLQELILGIFAVSAGTVLLPRLADAVREGAWREYSSTLGNTRMRSLL  
LLTVPVAVFMSMAFPERIVALLFKSGDFSDLSVHLTASAFFWHQTGLVFIAMNRLIAPAFY  
ARSDTKTPTWAGIASFGVNVILVVLAFRFQGGPIAFALSFSSAVNTGLLVRALIKGNIE  
GIRNELWMSLKYMLKMLLSIIAVVPSILVDRAVVAKVGAHSRLVASGVPLVAGTAVFA  
AVGIGLLVLTKDPVAASITNAFSRKTHGRGPSRS\*

>SPBDM4\_v1\_40412|ID:27157717| Cof-like hydrolase [Uncultured spirochete bdmA 4]  
MRTMNQPASDAHIKLIALDLDLTDLLRADLSISEENKRALQRAENMGIIHIVLASGRNYFSM  
HHYAEELFIHRRGDYLVGSNGAQLIQASTGNLLEDLKLSDADFCKSITQEFEREGYFWQLY  
IDGNIYCNHMNEWAIMDQRLSGLSLEVISDMDAVLSQDQTKILVCGEPARIEALYKELKN  
RIGNNVEIVTSKPYFLEILPKGANKGAALERLAKRLRIGMESVLAIGDARNDFDMIQKAG  
WGCAPANAAEEIRAIARFVSPKTNEEDAVANILEHVVFVDF\*

>SPBDM4\_v1\_40413|ID:27157718| putative carboxypeptidase YodJ [Uncultured spirochete bdmA 4]  
MFSLILVVSAASSCAAQKNMALSALPSDIRTQVEAALSAAHIGDTRSRIVEAIGNDASA  
FALLFHEVRDVMKKDPELLRRVDKSVLALPANFVPSDLVKLDGVFPYVVSCKKGMQLRAPAR  
DALVRMTEAARKEGETLVVSSTYRSYVYQKTVFERNVKEMGKTEAERVSAPPGMSQHQLG  
TAIDFGSITDEFADTAAGRWLSANAGKFGFSLSPKDM EAITGYRWESWHYRYISPAAAE  
MQERFFLG VQQYLIEFLAELPH\*

>SPBDM4\_v1\_40414|ID:27157719| conserved protein of unknown function [Uncultured spirochete bdmA 4]  
MKTDPQLKLA VLVDADNTQPAIIDGLLAEIAKYGIASVKRIYGDWTNP NLRGWKERLLEY  
AIQPVQQFAYTTGKNSTDSAMIIDAMDLLYTENLDGFCIVSSDSDFTRLAARLREDGKLV  
LGFGQRKTPKPFVAACDKFIYTEILQANVSESEDEERENPPDKESGKGATPPTDIKSDKKL  
KTLLLSAAEEAADEFGWAYLGEVGTYIANRLPEFDPRNYGFRKLGELIKAINLFEIDERT  
NPMVPGKQVYLRIKHRGN\*

>SPBDM4\_v1\_40415|ID:27157720| putative glycerate kinase [Uncultured spirochete bdmA 4]  
MREKTKLALREDAETIFQAAVDRVMPERLFSYCLSLEGSALGASDGMTRKYDLSQFEHI  
VIAAFGKASLPMAASLVSLGERVSQGLVVTKASEDGRPLQLAPQVEKVFAAQSVRVIEA  
GHPVPDQRSVMAGKEMTLASQVRDWEMHGSKTLVCVLISGGGSALLSAPVKGLSPEDTA  
DVTRLLACGATIHEINTVRKHLSAIKGGFLARAFSPAQTLVSLVSDVMGDDLDVIASGP  
TVPDMSTWQDVKAIFDRFGLFDALPEAVVRATHEGLSGLRPETPKPGDTIFDSCSTMLVG  
TNYHAILEAERTSRALGYNTLVIGTRISGEAREIGKIFSGIAQDIMLHELPVAVPACIIA  
GGETTIVTLRGKGRGRNQEMALSVLREFSHFPRALCSRLKGVVFLSAGTDGNDGPTDAAG  
AFADAEAIGRAQALDLNPSCFLAENDSYAFFEKADGFFKTGPTGTNVCDIQILIVR\*

>SPBDM4\_v1\_40416|ID:27157721| putative Tetratricopeptide TPR\_1 repeat-containing protein [Uncultured spirochete bdmA 4]  
MNKFYATLCERFGLNAYIAGDYQKAERWFRKLEQSEPTSIRVLRNLGVILLAEGRSEEAE  
RYLLREEKLYGASFYRHSALADLTYATGKRKEAARRYRLALREPECAEGGKMYHMRGFME  
KRLAMCEDEKRYTGTRKAMEFFRQAEESREAGAHQEAIQKFLQSFALDETNWPALNNAAS  
IYMNTLKQPAEAEPLFSQAFELSHSIQVARNVELCRQAINRGQKKK\*

>SPBDM4\_v1\_40417|ID:27157722| Gluconate transporter [Uncultured spirochete bdmA 4]  
MVSGVVALLLLLLSVIVIIIITGRFKMNAFLVLIGVSFLFGLAIGLPALDVIAGIKNGFG  
GTLANIGIVIVAGTIMGTILEKTGAALSMTQVILKLVGKSRAPLAMNIAGYVVSIPVFCD  
SGYVILNPLNKALAKESGISMVMAVALSTGLYATHTMVPPTPGPIAAASALGADLGKVI  
LLGLITSIPASLSGLLWATKFARRYEIEPESHESYSEIVKKFGKLPGSFSLFPIVLPV  
LILLKSVAEFPSKPFNGNFRIFLSFIGDPVSALIIGVLCSTLLVQKGELKNAISGWMGE  
GIKESAILVITGAGGAFGQIIKASPITEFIKTNMAGMQLGIFLPIISAALKTAQGSST  
VAIVTTAGIMAPLLPSLGLDPALTTIAIGAGSMVVSHANDSYFWVVSQFSGMPVNIA YKA  
FTSATAVEGAVAFAAVLILSLFVH\*

>SPBDM4\_v1\_40418|ID:27157723| putative Endonuclease/exonuclease/phosphatase [Uncultured spirochete bdmA 4]  
VRPAFFILSAIAMA AVGCRCSLAPAGTSQEIHIVSYNVHNLFDAAESGREYPEFKPSKGGK  
WTRELYAKRLANVVEAVLSVSETEGAGSRRAAAPDILCVQEIENEKVLADLAEHFGRGVY  
RYWAISGPDESIIHTGILSRFIVAMRTHSVMDAWGFGPLRDILEVELELGS AERIVMFV  
CHWKSKLEGEKETESGRRAAALLAQRIRGLQTEKPSLPIVVCDFNESPDEYIRVSRRY  
PTAIMPSDAGTPPSAAEGEPICVSGSWAGLANTGEDQPFSNENAPKLILYNPWNEISDGF  
SIAFQEKREQFDCFFLNANLHDGEGVEYESFGVANAPMLFDSNGTPFEWRGSEGYS D HLP  
VELILSMREGR\*

>SPBDM4\_v1\_40419|ID:27157724| proteolytic subunit of ClpA-ClpP and ClpX-ClpP ATP-dependent serine proteases (fragment) [Uncultured spirochete bdmA 4]  
MNGVATEIEIHARELEKTRVRINELIAEATGQPLEKITKDTDRDFWMNASEASQYGLIGK  
VILSKNELA\*

>SPBDM4\_v1\_40420|ID:27157725| ATP-dependent Clp protease proteolytic subunit 2 (fragment) [Uncultured spirochete bdmA 4]  
MKLAEPQTAETEAKRPEEPLSERFLKTRTVLLVGEVDKDLSEKVVRQLLLLDSISDEPIM  
LLIDSPGGDVYAGFSIFDVIRFIKAPVRIVGIGLVASAAALILIAVP\*

>SPBDM4\_v1\_40421|ID:27157726| Antioxidant, AhpC/TSA family (fragment) [Uncultured spirochete bdmA 4]  
MEYRHSAFHRFTLHASALMLLSILIFFASAGSVFGAQRSRPWYATRLEALGFYVFDQPFEQ  
PNFNVTSDGQMKSRSLSTKGNITLLNFWATWCPPCKQEIPTIQKLHETMKGEKFEIM AID  
LGEPPASVKTFLQNKITYPVYVDPKNSLAALYASRGIPPTYILDKNGKFIAGFIGPFEY  
DNPEFVSIMKELARK\*

>SPBDM4\_v1\_40422|ID:27157727| putative Cytochrome c biogenesis protein transmembrane region [Uncultured spirochete bdmA 4]  
MNQPDLIAAFGAGLVSFISPCVPLLLPAYLSLLSGLTVKELSDQQQKAKLLGASLTFSAG  
FTLAFTVLGVIFSGGMSFIGGGGTSQFLFGKIAGIIVIVLGLNVMFDFIQILNNDARLIRK  
FAGKGRGQVNAFLMGLAFAAGWSPCIGPILASILLMAARNANVGAAVLLLVTYSAGFAIP  
FVASALFFERLSPLLNFLKRHGKGVRIASGILLIAFGIAMALGSVSRISAIAAQTGGALL  
GFEASSPLPSHIIGTAFWLLFAWLSSRRILRRRKALKAVPGAGGATPRAQKSPVIA YIFS  
ATFIVLAVLELAGIISLLHLIGGWLTFGG L\*

>SPBDM4\_v1\_40423|ID:27157728| conserved protein of unknown function [Uncultured spirochete bdmA 4]

MKYVGIIDCGTTNSRFSIVDNRGKIIASVAAKIGVKDTASQRTKEPLKKGLRKLFEALS  
ASGIAASDLNLMSSGMITSEIGLMELPHQPAPIGLDELAKGLVLLSGSSELGIGVDIYL  
VRGIKNRPDPPRGAPLSEAKNLDFMRGEETQMMGLISLYGGGVPTTAVNLSSTKYAID  
AKDRILGSITTLGQVYESLATDSVIAKSIVPAPRDDVVADSDLLRDSLEKASVFAAAAV  
HDHGLLRSFMLPRFMDTLMWTDWRVRKRFLACIVADDLKVLDAFPEFGFKVGDVFLIG  
LEERCRLFQAQRHTAQGKNAKITVISNEEEIRKLAIHGALSIAASKAGLL\*

>SPBDM4\_v1\_40424|ID:27157729| Dihydrodipicolinate synthetase family [Uncultured spirochete bdmA 4]

MKLYGVIPPMVTPFKESGDVDYNALEVLVRFLATNVDGLFVCGSYGSGPLMNMDERKEVA  
TKSIEFAAGKVPIIVHTGSASSREAAQLSAHAVSIGALAVSAVAPYYFHHSPKGIIEYYR  
SILAAVPGKYPVYVYHNPRFSGYEIDMETMVKLADMGIAGVKDATFDIAKFSAYRRDLSR  
RGFDVVLGTESMWLSARVLGAEAFIPGLANAFPELCTELHRQGMQNDYKACKTQFVVK  
IRDLMYLAGSTQQA VYAMLSIRGIVKSYPRSPFLAANQSAQKELQELLAELGVL\*

>SPBDM4\_v1\_40425|ID:27157730| Transcriptional regulator, RpiR family [Uncultured spirochete bdmA 4]

MTASARSIPVDILAEIKLSLNTLPPLQQQIASFIIHPQDVVRMSISHLAMQTGAKSEAS  
IVKFYRSLGFSGYHDFKVTLATQIAGSSFHRPDMTTEIQVHDDVSSIRKKIFISSMHVLE  
ENNNTIDDEVLEKTVDILEQAKRVILGYGTSAAVAAYDLFVKLSRLGIDCHFSLDAHVNA  
LTLAEPREGDVVFAISYSGESRDVVLQAEQVRGTAKIIALTGEVDSPLAEIANVCIKAVKS  
FETAYRIDAMVSRMVQITIIDLFTALAIRGGDAALARLTRSRQGISFLKF\*

>SPBDM4\_v1\_40426|ID:27157731| Dihydrodipicolinate synthetase [Uncultured spirochete bdmA 4]

MSTQIGGIIPPVITCFDKNGKIDENAQKELVRYLSNHVQGFYPCGTYGSGPLMTSEERKR  
VAEIVIKEKGSALAIHVGAPESTAEAVDLAKHAESAGADAIGAIPPYYYAYSQEQLIDHY  
RALIKAVKIPVFLYNNPELSRNPVLSSELRILAEDGLAGVKDSSFDLVNFYNYILAVKQP  
GFTFIVGTEAIAAAAALDAGASGVIAGLANVFPEFLEDYTTWKQGDQPRTAKKQLDVIRA  
RNALKLGP TLMTYAGLRMRGFNPGYPRAPYTEITKEVYDKALREFKAMGLIG\*

>SPBDM4\_v1\_40427|ID:27157732| conserved exported protein of unknown function [Uncultured spirochete bdmA 4]

MRKFILLAVILSLVAGIPAFKDPAYPTKPTIICPWSAGGGTDNTARFIAGMLSKELGV  
PVIVLNKTGGSGAVGHMEGALAAPDGYTITNITFELNLTLYLGYANLTPAGIMPIFQFNE  
DADALSVQADSPYKNVKDLLDAIKAKPDGTFLFSGSTIACA WDLPRIQMLMAAGINPKRV  
KFIPTQGGAAPAITELLGGHVDAVVC SYPEIAPQVEAGKVRTLA VFS DQRNPLYPNIPTL  
KEQGIDVTGGTWRGFVPLKTPDYVVKTLTDALKKITASKEFVDFMKNKNQFGIKIRDQKE  
FTDFINDQFKTLEGVMEAAAGYLSK\*

>SPBDM4\_v1\_40428|ID:27157733| conserved membrane protein of unknown function [Uncultured spirochete bdmA 4]

LRINREHIVGFICIAIAAILCITPTFPKGQAGVNLTGPAFFPEVLAIAYLVLGVIQILI  
GFKAQKQIKDGTSPSDTQEVQKKKGRVWPTVEFIALLI AFIVLFEPLGFIISTIAFLFLM  
LLLGLKWWKSLLYAVIYTA VIYLLFGRLFTIGLPSGILSALGM\*

>SPBDM4\_v1\_40429|ID:27157734| conserved membrane protein of unknown function [Uncultured spirochete bdmA 4]

MIQAFIAVFSNPVLIPWVLAMALGIFIGAMPGLTATMGVALIVPLTYHMQPIAGLAMILG  
LSFTSIFAGDIPATFLRVPGT PASGAAVLDGFEMSKQKGSLAIMIDLFCSGLGGLIGVV  
LLITISPTLASFALQFTHFEYFWLGLLGLSMSAVITKGSNTKGLIAVVGGLLISTIGIDI  
STGYPRFTFGNINLISGINFIPVMIGL FGLSEVIKDIAMHTQDQLSSAAVVERGHTTVKD  
VLKVMGRNKR VIVQSSIIGTLIGALPGAGADIAAWVSYGFAKKT SKHPELMGTGTEEGVV  
APTTANNAALGGTWIPALVFGIPGDTITAIVLGAMLMYGLKPGPLVFTNNKELINQIFAV  
ALTSQVFVILGYIGIKAFSFLFKFPRNVVLGAGITIFSLIGAYAIRSNVFDVFLVILFGI  
LGYFMEKAEIPLSPFILGLVLGPMIEDNLRIGLIKTDNRFLPFLTRPISAVFAAILLITF  
LYEPVKTLTKRRKN\*

>SPBDM4\_v1\_40430|ID:27157735| PfkB domain protein [Uncultured spirochete bdmA 4]

MKDFLSFGEPLVGLYPPQAASVADDVPLIKTWGGDTSNFAIGVSRLGHSVSYLTA VGGDDP  
FGRGFLALWNKNGVDTS LITLDPKRRRTGLYFVSFENKKHSFTYYREGSATS AISIENIAP  
NIADEFKILHLSGISLGISGSALETGIKLM DIFQRSNRKISFDINFRPALWPSAKQASHI  
LSAAISGGVDYLEITDDEMLALGWGNTLEGLTSRFP AVGSILLKHGPKGASVYGE GNYFS  
VPAFEVEVKDTV GAGDSFDAGYLSATLDGAAPPEARFAVATAAL TCTGTGPLERMPYKK  
DVVFLFGASEK\*

>SPBDM4\_v1\_40431|ID:27157736| Nucleoside recognition domain protein [Uncultured spirochete bdmA 4]  
VTFSGQNLKLIARTWFKRTFDTSWFLKIMVPVSLVVALLGWSGSLEKIARALHPLMRIL  
GLPGEAALVYISGALLNNYSAIAVMSSMNLTLHDATILAVMCLISHNLIVETAVMKSLSGS  
SAAKMALLRIGVAILAGGILNLVLPSPFAEVKLFASGAVAQSDFWPMLGAWAISTLKLGTG  
RIIVYILVLMLAQTLLEQFNMMEWLSRWLGWLMRIFGLEPSMSFLWIVINIVGYAYGAGI  
IKAARDEGRMSLQEGDLFNHHAISHSLEDTVLYGAISLPVLWLMVPRLVLSLIVVWAE  
RLRRALFRRSPKTDVV\*

>SPBDM4\_v1\_40432|ID:27157737| putative 4-alpha-glucanotransferase (Amylomaltase)(Disproportionating enzyme)  
(D-enzyme) [Uncultured spirochete bdmA 4]

MKFIHEKNQFAGLAVPLLALKKNKNAACGVFSDLVNLGKLAQQWGLSLIQLLPLNDTGDG  
SSPYAALSALHPVYISLSETATTMASLGVPLEDETAKEKELARAARALDRKYGENLRVPF  
EDVLHAKLAALRAAWSVSQDFCGPLAEFAAQERWAKPYACFIALKEKFGRAPWWKWPEW  
TTVSAADIDALWFNLEIAEEARFRLWLQVLAREQLQRAAQSVREMGVDIMGDIPILLAKD  
SADVWANRAIFILDKQAGAPDMYSPRGQNWGFPLYDWDALRVQDYAFWRQRLSYADKPY  
TAYRIDHVLGFFRIWAIGAFESDAYLGAPEPSEMRHSELSALGFSDERITWLSKPHVPE  
LKIRNAEKECIDFAAVTERAGGVQPYADRKAADFVRRLEDVRRACFARIHNEPLFLFNPE  
IRGTGEINDLIWHVRQDFPEADHGLNDYARGMSDWIDRALYEVEPKDYVFQWSYHDTTS  
WKSLSPQEQGALEAKAAALTTASLDIWEARGRDLLSMLVSAAKMQPFAEDLGAVPTCVPK  
VLREMEIPGLRVLRWEREWKPGQPYIPLEMYEPLSVACTSVHDSSTNIRQWWEEDRPPQ  
LWAMFTKMAEHDALLRSLFESRAREKREAGQSPQSAVEPPKVLDTAAAAGIIRAMALSSS  
IAAVYPLQDLLACHSEWRES DPRDERINVP GTTLATNWTYRMPVDLYTLAKDRDFPALIS  
KLAAREAPA\*

>SPBDM4\_v1\_40433|ID:27157738|radA| DNA repair protein RadA homolog [Uncultured spirochete bdmA 4]

MKKPSLIYRCSACGHEEPKWLGRCEPCGQWNTMVEAKTTGRFEKDKTAFSVPLESVDPAL  
GARVSSGISELDRVLGGGFMGRSAILIGGEPGIGKSTLLLEASANLGAKGKALYVSGEES  
AAQIRLRAERIGALSQKIEVFCSDNVHACL SVMDSVHPLLTVVDSIQTVHSPEAGAVPGT  
PNQIKFCTQEFVEWAKSHDSIVVLVAHVTKDGMIA GPKAAEHLVDAVISFEQAENALRVL  
RTSKNRFSGSDELGFFLMGEGGLAELADPSGIFMVRREGQLPAGIAVAIVHEGSRILLAE  
VQALTIPSKSGIMRVYS DRIDPLRVSRIAAVLEKQTRLDFSSQEIYVNVAGGLRLTEPAV  
DLPLACALYSARSGQALPEGSAIAGELSLAGEIRPVRSMERRAKAARQLGFGRIGIPRAA  
LPGDELSLSRAGKVGAAATGSSQSGPHWLSVSSLKEALRILWNQESRT\*

>SPBDM4\_v1\_40434|ID:27157739| Methyltransferase type 11 [Uncultured spirochete bdmA 4]

MTAITLKPKE DIRIRHGHWPWIYDNEIARVEGEPAPGEEVEVRDARGLHVG YAFFNPNSKI  
RARIYSRTAKSVDEAFFTRAFESA KEWRQFCFRDALERGM SLRLVYGEADSV PGLIVDG  
FVGTPLAKDEELSDAQERARSGQLWLSVQFLSLGVEVRKALIVKALCKVFAPDGI IERS  
DAPVRALEGLPESTGVLWGSMPERIIMEEK GALFEIDL VGGQKTGWFLDQRANRHA AARH  
AAGRRIEMFCNQGGFSILAAKAEASVLA VDSSAEALELLRRNAARNQVADRVS VVEAN  
AFDYLRDLEKMGQRFDL IILDPPAFAKNRASLEGARRGYKELNLRAMHLLER GGLLVTF S  
CSHWFSPEMFDAMLADAAFD SNRRLRVLEERSQDL DHPIMIGYDESRYLKCRIVQVL\*

>SPBDM4\_v1\_40435|ID:27157740| conserved protein of unknown function [Uncultured spirochete bdmA 4]

MISHDDFIFCIGYDGDTAIVDGM ANKEFSRLSSAELAEKGLYRAAFASVLYSKNPEEMKA  
FIDL FNKKAGTQYTESSQLSRLFGVYLDEISKVKVL\*

>SPBDM4\_v1\_40436|ID:27157741|dfx| Desulfoferrodoxin [Uncultured spirochete bdmA 4]

MTQKKQIYKCMKCGNIVEVLHEGDGELVCCGEPMKLFVENTTDAAKEKHVPVLEKTADGW  
WVKVGAVPHPMEEKHYIEWIELIADGNSYRAFLSPGKEPKAFFPVKAEKVGAREYCNIHG  
LWKA\*

>SPBDM4\_v1\_40437|ID:27157742|rbr| Rubrerythrin [Uncultured spirochete bdmA 4]

MKSVKGTKTEVNLLTG FAGESQARNRYTYFASKAKDEGFIQMQLVFEETANQEKEHAKRL  
FKFLEGGSAKISAEFPAGVIGTTRENLA EAADGENYEWKEMYPGFAKVAREEGFDAIAAV  
FESIAVAEKQHAKRYEAFMANIDAGR VFKRDKPVVWRCINCGYLFEGTEAPKACPAC AHP  
QSYFELLGENW\*

>SPBDM4\_v1\_40438|ID:27157743| conserved protein of unknown function [Uncultured spirochete bdmA 4]

MAEWQAYEKATLQIGRSGSSLDIRERMLRSGSGSISNLDLVVAILGTGVPGKPVRR LAKE  
VLDQITESTHTFDIDKLMVIAGMG EAKSCAVAAAIELGRRIFSTRGTRIVMPKDAFPLLI

HFADIRQEHFIVMSLNGGHEVNAVREITKGLINKTVVHPREVFADPITDRACAVIVAHNH  
PSGNLEPSDEDLDITKRLRQSGDILGIPVLDHLIFSETGYFSFVEHGLIAASKGG\*

>SPBDM4\_v1\_40439|ID:27157744| 8-amino-7-oxononanoate synthase [Uncultured spirochete bdmA 4]

MDIFQKCFQFDLQKAMEKGIYPYFQPLDGLGTEAIFHGRKLMIGSNNYLGLTMHPKV  
REAARKGLEEFGPSCTGSRFLNGTLKLHLELEERLAVFVGKDAALVFSTGMQTNLGAISS  
LIGRNDVVITDKEDHASIVDGCRLGMGEMKRYVHADLDQLERILQKIPQESGTMVVVDGI  
FSMGGDIVDLPKLVDICKRYGARLYVDDAHSGLVGGGHGTAWHFGLTDKVDIIMGTFSK  
SFASLGGFVAGDKDVINYIKHTARSFIFSASLPAPNAMAALAALDIMETEPEHVERLWDN  
AHFMIKGFRELGFNIGNTQTPPIIPIIIGEDETCFRFRWRELFNGLYTNPVVSPA VPEGMA  
LLRTSYMATHTKEQLQRALDIFEKAGKKFGII\*

>SPBDM4\_v1\_40440|ID:27157745| putative TrkA N-terminal domain protein [Uncultured spirochete bdmA 4]

MRQFAFVGLGSFAMSLERIAEVDQIIAVDDDPTRIEHIKEMVSTAFTMDLLDEDAFER  
VFHDPVDVAVVDIESNGAAILLVTFRLKKLGVPEIIVKSNSEYEELLRLVGATRNVNSD  
KEAALRVTPVLSSSLTNFMPISGDLVLAEVIAPDFVVGKTVVEVDMRRTHHVNVVAVKY  
ASERAANEASEGVFHDLDTTYRFKTDGVDLLVTGKEDDVVFSVGVQKTAEHEKKKTNTAL  
LKNMLGRKKQGSACA\*

>SPBDM4\_v1\_40441|ID:27157746| H(+)-transporting two-sector ATPase [Uncultured spirochete bdmA 4]

VSTRIRIGNETLSLLLYFTGLIFAGSILFSLPFATQHGSRMRYIDALFTATSAVCVTGLTV  
VDTLSTLTRAGQTVLLILQLGGLGIIAFSTLYLFTPRRKISIVTRGLAGDYTVPSFEFRT  
RKIIAQIVTWTFSEFIFAGALIWPVLESEHGYSFFDSVFHAISSFCNAGFSTLQSGMESFR  
DNVLMNGVTMTLIVAGGLGFIVLQDIARFIQKKLHLTYHSSIVLRTSASLILIGAVLFF  
VLEYNHALKGMMSGGSKIMASLFQSVTSRTAGFDTPQAKLTSTAQFVIIVLMFIGASPGS  
TGGGVKTTTFYLMMLVALRFREGGGVLDNRNRTIMPHSIFKAAAVVVRALLIVLVVAAIL  
LIAEQAQGRPLGIETAVFESVSAFGTVGLSIGITPSLSVISKLALIGAMFMGRVGLFAMA  
IPHSRLSPERYAMSPKADILL\*

>SPBDM4\_v1\_40442|ID:27157747| putative K<sup>+</sup> transport (Trk) system, NAD-binding component [Uncultured spirochete bdmA 4]

MKIAILGAGLLGSLIARELIAENRDVVIIEKNPNIAKSIANDLDCIVQDGDGERIDTLVA  
AGVGDADWFIACGTGSDETNIVSCGIV AETFKKVKTIARTRNPYFASFKKSEKRILGVDHI  
INPEAETAETAIARIIFRGMSPPEIDVKEAGIQLRLLCKKEPRFVVGKSLAEVRSGIGLDF  
MVPVAVLREGELIVPTGNFVFAEDDAAYILGEPSTLDRFLGPKDALRKFNSLVIFGAETL  
TSLLLQELGIEQITAQDRHPRGKGPLSLLGNPRIKVIDGDRDLLKSLSAMFPDIEPINHQ  
LRDEHFIEEENIGNADIVLSLTSQDQINILTALLAKNAGARRTLALVNDLYSPILYSLN  
IDIINEKTVMSGTILDQVRKAKIRRLYNFPRNEYELIEIQISNSFEYLGTEIRNLNLPK  
GLLITFVIHEGKTSVPTGNTKILENDLVGLIHKKEQIGRIEAIFGA\*

>SPBDM4\_v1\_40443|ID:27157748| [trkH] Trk system potassium uptake protein TrkH [Uncultured spirochete bdmA 4]

MHIKAILRMLSTILLIVSFFIFGCGFFSLIEKNAQVSLSLIPAALGIAFFLVMFFVSR  
KDEKPFNTNRDGLFVTLVSWVFASALGALPFTLSGYIPS YIDSFFETMSGFTTTGASILT  
NIEALPRALLWRATTHWLGGMGIVVLLVAVLPALGFSAIRVIEAEAPGPSVDRITPHIS  
STAKTLWLIYIGLTIIEILLVIGGMPLFDAICHA FATMATGGFSTKNASLAHYDSGFIH  
WVITIFMFLAGTNTLHYRLLSGNVRSILKDTEFKVYFMLFAVSSIIIAGDLFHSGVYQS  
FGESVRFSSQVSSILTTTG FATSNGEWPAVSQTVLFLVLMFIGGCAGSTGGGIK VIRVV  
VLFKMAMTEMRYVANPRGVYTILLGNKALRKNVIYDIAALVFLYFAFFFVSVIVISFTGV  
DILTNTAVIANLGNIGPGLGKVGPFVNYAFFPWWAKLWLSFAMLVGRLEVYTVLVLF SR  
KFWRSF\*

>SPBDM4\_v1\_40444|ID:27157749| Beta-phosphoglucomutase [Uncultured spirochete bdmA 4]

MFEHEEWRIAEPGYDIHQIEKYETL FALGNGNLGLRGDFE EKIPAFHRGTYINGFFEKEP  
IAYGETAYGYAENHETILNLPDAKIITISVEGEEFLD SAEIQSYERYLDRNGVLIRSV  
RAMLPNRAIEVISSRLVSLERESIGAIRYEARVIDTPDGRPVAVRLESRVEGMATNRWA  
ESDPRVGSKISR AAYSITRLECNESESRLLIATKNSGLAATAQVTHAFYGPETMALSATA  
EASSAVQRWEGAARPGERIVLIKYMAYRMASAGEEALLWQSAHEELINASRDGFEE LQRE  
QREFLADFWNCADVIVEGGPDIQQALRFNL FHV LQSSGRNGKTSIAAKGLTGEGYEGHYF  
WDTEIYVCPFFTYTKPEFARRLLEYRYSLLDKARLRAETMTEKGALFPWRTIDGEETSAY  
YPAGTAQYHINADIVYAMEKYCEVTGDAEFLYGPVAEVA VETARLWVSLGHYGD DGRFRI

DEVTGPDEYALVNNNA YTNLMARNNLYFAVRILRAMQGERPDSFESLRRKTALEDDEIE  
GWRNAAGSVYVPYDPKTGIYAQDDSFMQKERWPFSETPPEKYPLLLHFHPLVIYRHQVLK  
QPDLVLAQFLLPEQFTLAEKKRNFYRFEPLTTGDSSLSHCIQSIMASETGNSEAALDYFM  
KTVRMDLDDMHGNSRDGIHTAAMAGSWLSVYVGFAGFRDRASAEGEIRYSFNPRLPAGWR  
RLAFGLQLGPVKLSIDIGTSEVKYSLEEASRSGGSASAETGGGLRNSGALTFLHRKQKVI  
LKSGESAVLSLEPALRAALLDLGDVVTDTARYHYLA WKRLADDNGWHVDEKLGEGLKGVG  
RREALLEVILGHNGVNLPEEKKHELAERKNAYYREFLRKITPDDILPGMKSLLLGLGQRGV  
KRILASARNAPAIIDCLGLGPIGRFFDGIADPNAVTCGKPDPELFLLAADIAGASPED  
CVGIEDSLAGIKAIKDAGMKALGVGNLEGADLSVSSTSDITVDTLEQLIRS\*

>SPBDM4\_v1\_40445|ID:27157750| Transcriptional regulator, LacI family [Uncultured spirochete bdmA 4]

MKKQSIASDVAKMAGVSRRTVSFILNNIQGKHISEATRQRVLQAVEALKYVPDMNAISL  
AKKTHYSIGFFISYSSSVFSDAYLFRLEIEGMALVLNKRHCRLDFQPLRKEKVNLDLVR  
AGLDGIILMNTHTDDPGIQELEVARVPLVVIGSIEGLSVPQVDIDNIAAAREMVKYLVS  
GHRKIAMIHAAPLTFYAAHRLEAYTQILYEKGIQRPEYVEVADFSEESGYGAMQKLLG  
LSDRPTAVFAGNDMVAYGAMQAILDAGLSIPEDISIAGFDDDDYLSRYLNPALTTVAQPSV  
GLGEEAARLLIQEITSPHESRSRGRKERIILPTILAKRESCRRI\*

>SPBDM4\_v1\_40446|ID:27157751| ABC-type transporter, integral membrane subunit [Uncultured spirochete bdmA 4]

MANKSGSVRTPLRRALGRIPHLVILICVAWITPSAGLLVSSFRPKNMIATNGWWEAFK  
TPFSFTLENYAYVLTRGNMGRSFVNSLLIAPSTLMPIFIGACAA YAFAWMRFPFRKTL Y  
LMIIALLV VPLQMTMIPILRLFNKVGLTGSFVGIWLAHTAYGLPFAIYLLRNFI AQLPRS  
LIESAQIDGASHPTIFLKLVLPTSIPAIASLAIFQFMVWVNDLLIALIYLG GTPDVAPMT  
VTISNMVNSYGGGWEYL TAAAFISMVPLIVFFALQKYFVKGVLAGSIKE\*

>SPBDM4\_v1\_40447|ID:27157752|aglF| Alpha-glucoside transport system permease protein AglF [Uncultured spirochete bdmA 4]

LAWGKYKARQKNMHTNYIMVAIAALAVIPIFLWAYLMITEQIATHTSRKTAGVLRPWFWI  
LPAVSLLIIFLVYPVINTIVLSFMDARSEHFVGLRNYKYIFSDSGMLV VLRNNLLWL VFF  
TAACLVLGLLIAVLSDRVKYESVAKTCIFLPMASIFVAAGVIWRFMYEFRPAGTPQIGTV  
NAILTAIFPNFEPKAWLFNRSTNNAALIVVGIWMWTGFAMVILSAGLKGISEDILEAARI  
DGASEIAIFFKIILPLMMPTITVVATTLIINV LKVFDIVYVMTNGNLGTEVIANRMYKEM  
FNFRNYGRASAIATLLLVAIIPVMIMNLRKFNTEESNG\*

>SPBDM4\_v1\_40448|ID:27157753| Extracellular solute-binding protein family 1 [Uncultured spirochete bdmA 4]

MKRAVLIALLAVAAVGFVFAAPSGQKTINFLGVWGGQEADVFLAMVKPFEEKTGKIVELE  
STRDLDAVITTRVEAGNPPDIAALPGPGKVELAQSGKVELSKILDMKEFDKNYSSGWK  
SLGTVNGKLYGVFMKAATKGLVWYDPATFKEKGLTVPTNDWTWDQMMALS KQAISNGIAP  
WAIGVESGSASGWVGTDWLENIFLRVNGPDKYREWYEGKLPWTSPEVKKVWEIWGQIVAD  
PKMIYGGSSYVNSTNFGNAAAPLFTQPPQALLHQQASFIQGFITSQFPTLKPVQDFDFVA  
FPSIDSRYAKAVEAADVIGVFRDTP EIREFVNYLASAEAQAFWAAGTGALATNRNVSLV  
FYSDPLIRRAADILNKSEIVVFDASDMMKPEMNAAFWSAVVSYIDNPKKLD SILAGLEKV  
RQEVYQ\*

>SPBDM4\_v1\_40449|ID:27157754| Uncharacterized AIPM/Hcit synthase family transferase aq\_356 [Uncultured spirochete bdmA 4]

VLKLEMFDTTLRDGAQTEGV SFSVSDKLA VVKTLDAFGVRYIEAGNPGSNPKDMEFFAAA  
SDLNLQHAKLVAFGSTKRKNIPVEDDGNVRSLLQANTSCVAIFGKSWGLHVTEVLSTTFE  
ENLRCVLETVRFFREKKGKEVIFDAEHFFDGCRSNRDYALDVLGAAVEGGADVLVLCDTNG  
GTMPLQVYEIVELVCGRFPGMRIGIHCHNDMGCAVANSMLAVKAGAVHVQGTFTGIGERC  
GNADLGIIPNLQLKGGYECISGNLEKLCETEIKIAEIANLPVPHNKPYVGESAF AHKGG  
MHIDGVDKVSHSFEHIDPTFVGNRRRFLSEVSGKKA VLLKIRDVAPELTKDSPETAKIL  
DKLKELEHEGYQFEAADASFELLVKKVIGKFRPHFDLNM YRASSESPAPDGEMNSNAMIK  
IKVDGSAETTAAVGNP VNALDLALRKALCVFYPELSNVHLIDYKVRVLETGRATGSRVR  
VLIESTDGHRKWITVGVSTDIIEASFVALVDSLEYKLCMEENE\*

>SPBDM4\_v1\_40450|ID:27157755|ilvC| Ketol-acid reductoisomerase [Uncultured spirochete bdmA 4]

MANMYYEKDCDFS VLKKGKTVAVIGYGSQGHAAHALNLKDSGANVVVGLYEGSKSMEVAREA  
GLRVMVTADAVKASDVVMILVNDEKQASLYRKDIEPNL KSGATLAF AHGFNIHYGQIQPP  
ADADVIMVAPKGP GHTVRSQYLEGKGV PCLVAVYQDSSGKARDIALAYAYGIGGARGGIL

ETSFREETETDLFGEQCVCVLCGGVSELIKAGFDLVEAGYQPENAYFECLHEMCLIIDLVV  
KGGLSYMRYSDTAEFGDYTVGRRIITEETRKEMRKVLSEIQEGSFARSWILENQANRP  
YFNARRRQEQNLLVEKVGAKLRAQMSWQKD GK\*

>SPBDM4\_v1\_40451|ID:27157756|ilvH| acetolactate synthase III, thiamin-dependent, small subunit [Uncultured spirochete bdmA 4]

MIRGNRMLNHQFIVSLLVSNHAGVLTRVSSLFARRSFNIDSLTVGVTEPTLSRMTIVSW  
GDDYMKEQIVKQLQKLM DVKKVQLMQSDKIVVRELMIVKIRIKKGELSEAMEAINAYRSN  
VVDLSPDSIAVEITGEPLKLN AFLNYIKRYEIVEMCRTGPTAMGRSTYCLENDTY\*

>SPBDM4\_v1\_40452|ID:27157757|ilvI| acetolactate synthase III, large subunit [Uncultured spirochete bdmA 4]

MLLTGAQIVIKTLIEQGVDTIFGYPGGTVLHIYDELYKNSDRIRHYTTTCHEQGAHAADG  
YARVTGKTGVVIATSGPGATNLVTGIANAYLDSSPIVAVTGNVATSM LGRDSFQEVDISG  
ITMPITKHNYLVKDITVLADTMREAFFVASSGRPGPVLIDITKDVQTGMAEYEPALAAQK  
YEPAPQISESRLEEAARLIREAKRPYIYCGGGVVISNASEEVIAFADKIDAPIGLSIMGL  
SAVPYSHPHFLGMVGMHGRYGATKALYESDLLIAVGTFRSDRAIGNKLEFSRDRKILQID  
IDPAEIGKNIGVTMGIVGDVKIVLKAL TAKLSRREHKA WGERVKYIKGHPDNNLEMDSGR  
LTPQSVIRGICRRMGDNV VADTVGQHQMWT TQYYQFKKPRTFITSGGLGAMGFGMGAAIG  
ACVGSGLKRTALFTSDGSFHMNMNEMATAVSN DLPLIIVLLNNHTLGMVRQWQTLFFDGR  
YSNTSLERKTDYVKLAEAFGAKGFK AETNEEY EKCLDEAFQYGTPVLIDCTIDSDERVLP  
MIPPGGSIDDIILR\*

>SPBDM4\_v1\_40456|ID:27157761| CDP-diacylglycerol/glycerol-3-phosphate 3-phosphatidyltransferase [Uncultured spirochete bdmA 4]

MTAADKVTLSRIIVAPFFFFVLKAEFIPRQPAIVALWIMFCWME LSDLIDGRVARAHNQI  
TPFGKLFDPFADVISRVTYFLAFTSIGIMPLWVLLIVLYREFSILFLRMLLGLKGIAMGA  
RMGGKLGAGIYMVAGLLSLALYTAQVY GSPGFSGPV PYS DMSGLTNILSTLTLIAYILAA  
VATILSFIDYLVQFRKLYR\*

>SPBDM4\_v1\_40457|ID:27157762| conserved membrane protein of unknown function [Uncultured spirochete bdmA 4]

MEEERIASLRRSILITTSVFFIVQCTLFLIFSVSAGFDSKYWSMFLPISGGFHIVILIML  
LLFQDDFTIESTGEKLDHVN FANIITLSRVSTMP TLLVLVMAAKQYSIKIPLLILVALIF  
LTDFFDGRISRKTNQVTRVGRMMDSTSDY TLLVVL SVIFQYYSLIPRWF FTLVLLRLGIQ  
ALLMAILAIVKKHIEPNSTFMGKVTVASIMVLYTLEIIQLAVQAPLLVFRIAEWIVAI  
IVIGIFDKIASFFDALKSKPSTP\*

>SPBDM4\_v1\_40458|ID:27157763| conserved protein of unknown function [Uncultured spirochete bdmA 4]

MAVIKTALELALERTKNLQIDESVQKANEAKLEGRKAAGRFL EAPDSVDFKAIFDTIDAA  
QRQTFLSAAFEVLTAPIQLPVNTAVETAKLESSGKAIVALCGLSSKFTSEREVKLAQQQA  
RSLFQQIIQFLGKYSEEMKRVEQAIRNQWAPK LREKERQLAAQLGQNVRIDPMSDPEFAE  
FYRKNIDAMRKNYS DALEEAKTQLS QLCGF EKH\*

>SPBDM4\_v1\_40459|ID:27157764|mmG| tRNA uridine 5-carboxymethylaminomethyl modification enzyme MnmG [Uncultured spirochete bdmA 4]

MADFEAIVVGGGHAGIEAALALARLGTKTLLVTQNPDTIAKMSCNPAIGGLSKGNLVREV  
DALGGQMGI LADATSIQVRMLNQSRGAAVQAPRAQSDKALYSAMARQALEAQPNLTIFMD  
TVTDILVSGGEQRRIAGVRTERGNSISARTVVLTTGTFMEGKLF IGQWSGPGGRLGEPAA  
IGLGTALRARGFPVGRMKTGTPARIKRGSIDFSKLEAQHSDPHRIFFSFLERDYGRPDLP  
CYIVYTNQATHEAIRAGLDRSPLFSGVIVGKGPRYCPSIEDKVVRFPDRERHQVFIEPEG  
LYTDEVYLNGLSSSLPEDVQTRFYHSIPGLEHAEIVRPAYAVEYDYIDSSALYASLESKI  
VGGLFIAGQTNGTSGYEEAAAQGLMAGINARTLDGEPPLILGRNEAYIGVLIDDLVTL S  
PKPEYRMFTSRAEYRLALRHDTSDLRLTPYAIEIGLADEQRRECFERRLRTIEEVKELLD  
GRKVQREDCVQIPELGNHVGQALAEALRDPKIGALLDDEADALARIARLLPQTATMQASG  
VLTALLNERYKGYLEKEERLANRLSKADKLFIPAEFDYSYLKGLSREAEKLT AQRP LTL  
GQASRIPGVRKSDV ALLYIALAKRGG\*

>SPBDM4\_v1\_40460|ID:27157765|mmE| tRNA modification GTPase MnmE [Uncultured spirochete bdmA 4]

MSRTYFDRAEPIVALATPEGRSALAVIRTSGENAVDIVARCF SQPQALLGAEGYHAVYGW  
IFDPVSQERLDEVVALVFRAPHSFTGENAVEIMCHGSTAVAQRILEVL YTQGFSPALPGE  
FSFRAFAGGKTDLVRAEAINELTHASCEAARHDALQRLSGVLSRKLEIRNLMIDVLADI



NARLDYPEDEGEPEETDRWVQLMQRAQDELSDLIRSYPGGRLRQEGLLVVIAGRPNAGKSS  
LFNLLVREERAIVSPEPGTTRDWLEAWISIGDFAVRIVDTAGLRNTGNSIEAEGVRRSHA  
LLARADVILYLVDGTVGLDDEDRSFVARYPRALLLWNKADLRCMPAPSAWAAVSAKDIH  
SFGSFESMLKSALHSSIQEALTSGQYEAQVRIASERQARLLRQAHEAIAQAMEAQTAGAG  
LDLVALHIRESAECIGEITGDIAPDEVLERVFSTFCLGK\*

>SPBDM4\_v1\_40461|ID:27157766| protein of unknown function [Uncultured spirochete bdmA 4]  
MTPQELSSLDYEGASELLLAYATDAKKYEKEIASLKSQAEEWWSKAMLAKSRAPELSES  
ASQKASELESKAQELSLELTGLRRDIEQLREALPIKAKQRRVDPDQLLAELSMIVGDLG  
DEKKPVGPGSGATAGGTVAGEAASEAAAGTSAGPGTEGPEAPPEPPTNPPSQPIDDALTE  
LKKKMGLL\*

>SPBDM4\_v1\_40462|ID:27157767| Glycerophosphoryl diester phosphodiesterase [Uncultured spirochete bdmA 4]  
MRHPSLLPKFPRPLFAHRGLNRKFLIENTIESFQAALETGIPGIELDVHLTSDGKLVVFH  
DDDSGRIEIEAHPDEPVRNLSLENSTLSELRSLSIGAQIPLLELLEHFGSRVYYDIELK  
SRSSADTGLTSKVAGAIRSHGLGKNCVISSFNPFALRHFRKADPAIPLGIWSTSHELYW  
FLRHGEGALIANVDFLKPESLAAHLPLYLRLSGKPFIPWTVNDPQIARSLARGACGIV  
SDEADVIKAAALDG\*

>SPBDM4\_v1\_40463|ID:27157768|nadE| fragment of NAD synthetase, NH<sub>3</sub>/glutamine-dependent (part 2) [Uncultured spirochete bdmA 4]

MNKAPSAELRHNQKDQDTLPEYAVLDGILRLYIEENRTMDEIVDAGFDRATVRRTLEMTA  
KAEYKRRQGAPAIKVSKRAFGVGRRLPLARTIHEVA\*

>SPBDM4\_v1\_40464|ID:27157769|nadE| fragment of NAD synthetase, NH<sub>3</sub>/glutamine-dependent (part 1) [Uncultured spirochete bdmA 4]

MRVSLVQLNSTIGDFKGNADRMLVIVNLILATFSASEKPDIVFPDQSLCGYPPMDLLDQ  
ESFLFGSVAALRRLHKLLENIAVGVGYVDKNRERAGKSLVNTYSVLCNGIVLFTQAKTL  
LPTYDVFEARYFEPARTRQVFAQDCGRVGFACEDFWWEAPDASQKYTIDPVKELMDAG  
ADVLIIVPSASPFIAGKLTTRLNLAEKAVRAGSIPVLYCNAVGANDSLVDGGRSFAMAEDT  
SIRGVCGWGEEVLT YDTKTGVASRLVLDSPSQLEAAEEDINPHINRYDEIRRAIVGIQ  
DYLKSGFSRVCLGLSGGIDSALVAVLAAQAIGSRNVTCISMPSRFSSTGSLDDAVELCR  
RNKLRLERIEVPFTA YLNALAVPFAGRPYDITEENLQARIRGTLMAWSNKFNALLT  
TGNKSEVATGYCTLYGDMNGSLAPIADLYKTEVYGLAAYFN\*

>SPBDM4\_v1\_40465|ID:27157770|lgt| Prolipoprotein diacylglyceryl transferase [Uncultured spirochete bdmA 4]

MVAMLDLFPKWLSPEIIPGLPFRWYGLMYLLAFAVTWLLFRKESKRLGAPWSEDEAVNFFI  
WSIVGLLLGGRLAGTLIYEPTNYWIKPWFIFWPFDESGAFVGFQGM SYHGGFAGLIAT  
LIWCRVHKWNWFDWADLIAVSAPLGYTLGRLGNFINGELWGKVSTAPWAMIFPNAERFSA  
KEPWWQEVARKVGIRLVSMNDMVNLPRHPSQLYEAVLEGIVLWLILWFVVRKHRTYRGKS  
VGIYALGYGVARFIVEYFREPD SGLGYILPLGDPNAPTARFVSVFNFSMGQILSFLMIVA  
AIIFMVYAHKHFKINPGDPVFDASKTGPGTDAGANTGAQGT SRHTSKFDAL EARKLK  
IK\*

>SPBDM4\_v1\_40466|ID:27157771| protein of unknown function [Uncultured spirochete bdmA 4]  
VLALLAFVHPSNASVPVDLARTGGSILILILLDVLILGLLALDALRYHPPREGKPALGQE  
AGSEKPQVSVHAHDDPEHEVS\*

>SPBDM4\_v1\_40467|ID:27157772| exported protein of unknown function [Uncultured spirochete bdmA 4]  
MRRSPFLTAGILAFFRVFVLGIAAVSLGMGDYGGVSSALLRIFQLYNLLFVYIVILQYF  
KPGAREFL\*

>SPBDM4\_v1\_40468|ID:27157773| Carboxyl-terminal protease [Uncultured spirochete bdmA 4]  
MKNIDTPVVRKRLISVLSFVVILALTFVTVSPELYAQQTTPDAKQYSQLLQNIQFIL  
QNYVDEPDAKLYQGAIKGMMDSLNDPYSTFLDEDMMSDLMSDTTGTGGVGLYISKQAT  
APTEDTPRYIEVVSPIEDTPAWKEGIRSGDLITKIDGEDTAPLSADKASAKIRGEAGTTV  
TLTFKRGSYEFVTFTRSKIEIPAVKNAITTAQGDVGYIRIIEWNPNTPEQM KIVLQDM  
KKKGIDKFVLDVRSNPGGLLSSVVDVSDLFLSSGVIVSTKGRITISENYEYKAKPDLAIPQ  
NNRMIVLINQGSASASEIFAGAMKDTKRALLLGEKTYGKGSVQQIFPLDKAGFKLTMAHY  
YTPSDVNIDKIGIEPDISVAEPELSDKEFAEVQRLYDAGDIARYLQSVPPQPTPEQRKEFA  
KELAKKYAVPENILEKLVREDETERSQPARVYDLEYDVQLQKALDLIATPDFENKLNKTKT  
MAQLHDADK\*

>SPBDM4\_v1\_40469|ID:27157774| protein of unknown function [Uncultured spirochete bdmA 4]  
MRQIVLPGNQSGKETCVLDAKTSHYLVSVRRMHRDDSFAMDETGTRFTCTLLSDEPRGA  
KVALVQASSPESAAHD\*

>SPBDM4\_v1\_40470|ID:27157775| Ribosomal RNA small subunit methyltransferase E (fragment) [Uncultured  
spirochete bdmA 4]  
LNAMEFEREHA VRILFHESEQQASLPLHTLLSAVQNRIVIGIGPEGGFSEEDCAAFQMG  
FAIHHAKGPVLRVETAATYAISAVRAITLEKNIWKV\*

>SPBDM4\_v1\_40471|ID:27157776| protein of unknown function [Uncultured spirochete bdmA 4]  
MESLNIPNAILDNVRIDFSPRFVLYALPYLWDDERNHQICFINTSQWQSAKNRDEYGSMI  
ASTDIVLSRDRNLAERAAHAGKALRSWSVPIHQILLDALYESMEIENIDAHPMEKDLE  
VYRPQKVLTLSSAIEKRNGSIFLLGGSPITLIKAEKNIRATYPGITIVGSMHGMYPQE  
EIALIQAIQKGNPTLILAGDPIAGERWIPRHMSTTRSGIFFYYGPILRWFAGR\*

>SPBDM4\_v1\_40472|ID:27157777| protein of unknown function [Uncultured spirochete bdmA 4]  
LAVALSKRFEVSIAGDLELAAIMKEHKPAILLIGFASHDRAFNA YHLECVHRSILSAKI  
GNQERSPPLSVFIIESEMHALMPGNSRLKALQSLPFCEVHVIIYLPPIERISSIIFSAV  
EENLDSSCAERAEIQSFTCLFADECSPHIGKSKKFRRMISQIRSYADEQRPVLIIGETGT  
GKELAAHSLHSWSKRKLNSFVALNCAAIPETLFESEMFGTERGAYTDACSRCGALEQADN  
GTLFLDEIGLSAASQPSLLRVLETGEYRRLGSTHSHAQFRLVSASCLNPIDLAAENRF  
RNDLLFRIADFVIEIPPLRERKEDIPLARHFCTQFSKDIYDIEDGALDKLAVHDWPGNI  
RELQSVIARACARKTAGEIGADDIEFLTGISRLAPHKS\*

>SPBDM4\_v1\_40473|ID:27157778| Short-chain dehydrogenase/reductase SDR [Uncultured spirochete bdmA 4]  
MSTANPEGLPVDSTFHGRFALVVGSGGGIGRAISIELSRRGARLLVHGRHASERTQGMK  
LGFHETFDAEFSSPGSFIHALDARLDKIGAEPDIVICAFGPFQEKPLAQCTTEEWELTL  
ANLALPGALASRFLPGMIARKYGRFLFLGGTRTDGIRAYRKTAA YASAKTGLGLAKSIA  
AEGASHNVA AVLVCPTETEYLDNETKIRHASLIPTGSLAQPECVARTSLNLIDADPCI  
ASGAIVSLDGGFAP\*

>SPBDM4\_v1\_40474|ID:27157779| protein of unknown function [Uncultured spirochete bdmA 4]  
MPSRLLSRIQKIPQPGSDAISSQTSQDFPDCAVARFVGA VTDTNLEAVAQSFDAILSES  
IHYL VVDFSTIEDIGPAGIGLMLVLRQRLRDRHGDIVLCAMRPRMERMQRILGLEGYFTT  
AADSQSAIQGLKNVFDGTYPLSVRCPACDTLIDIEHPGRGRCQTCEAVITAFPDAITLG  
\*

>SPBDM4\_v1\_40475|ID:27157780| conserved protein of unknown function [Uncultured spirochete bdmA 4]  
MSTLPKIEQYLIDLGISYQEISNNSWLIEDENKGYPKMLVSLSDPLVIISADVMPVPPKKN  
AEQLFRMLLELNATDLLHGAY AISGNDIIVIDTLQATLDKEEFLASIESISFALLEHYK  
KLASYIQKAAE\*

>SPBDM4\_v1\_40476|ID:27157781| conserved protein of unknown function [Uncultured spirochete bdmA 4]  
MGMFERLKTVISSNINSLISKAEDPEKMLNQMIDMNEQLIESKKSVMAMIADEKKLERD  
MIENRAKADEWEKKAMLAVRAGRDDLAKELLRKQEFEGYATQLAQQWEAQKQSVEKLD  
ALRQLQSKIEEANRKKNILIARAKRAEAQQRINQTMSSLSGNKSAFETFERMERKVDIEIE  
ASAEATKELDEASSGASLEKQFTQLESSPQAAETMLEELKKKMLTEDAGRAGS\*

>SPBDM4\_v1\_40477|ID:27157782|murA| UDP-N-acetylglucosamine 1-carboxyvinyltransferase [Uncultured  
spirochete bdmA 4]  
MDKYIIEGGYPIKGTMLSGNKNAALPCIAASVLAEEPVTLRNIPAIEDVLVMFDVLRNL  
GGTFVQLDAHTWRIDRSISNYEVPPEELARKVRASILFAGPLTARFGKAILPPPGGDTIG  
RRRIDTHILALQELGARITLENMLTFSAAKLVGASVFLDEASVTGTENAIMAAVLAEGTT  
VLMNAACEPHVQDLCRMILQMGAEIEGAGSNRLTIHGKSLGGTDFSSISADYMELGSFVG  
LAAVTGGDLRIEGVCADDIPPLKVGFSKLGVTWELKGTVLRPNTMGELRVVPDIGGQIPK  
IDDAPWPGFPADLTSIMTVVATQAEGVALIHEKMFESRMFFVDKLISMGARIVLCDPHRA  
IVYGPSKLVGNVLPSPDVRAGMAMVIAALCAEGTSVIHNVYQIERGYDNLVGRLSAVGAH  
ISYC\*

>SPBDM4\_v1\_40478|ID:27157783|pyrC| fragment of dihydroorotase (part 1) [Uncultured spirochete bdmA 4]  
MFQIQDRFTIRMPDDFHAHLRQGGQLSAYVRGHAGQFGRVLLMPNTLPPVSDLARLEA\*

>SPBDM4\_v1\_40479|ID:27157784| protein of unknown function [Uncultured spirochete bdmA 4]  
MRGAEVEALARAGEVAGKYYPAGSTTNAEGRPSFDEVEEALNAMEARKLVL\*

>SPBDM4\_v1\_40480|ID:27157785|pyrC| fragment of dihydroorotase (part 2) [Uncultured spirochete bdmA 4]  
VLDRERAFLPQVEHLLVRHPRLRVVLEHLSDAQSVGFVKTGPENLAATITAQHLLFTIDD  
MIGESMHPHLYCKPVLKFDRDRDALRAAVLSGSKKFFFGSDSAPHPREKKECGAAASGVY  
STPSALPALVGLFDSLGLSLIPFMTERGAIFYGLPLNSRITLERSPWEVPKLLGGAV  
PMCAGQTLWRVARN\*

>SPBDM4\_v1\_40481|ID:27157786| Xaa-Pro aminopeptidase [Uncultured spirochete bdmA 4]  
MNTTKYFRRRAGLAAELGRHGLAAVMISDFEHGRDSSLRYLCGQPSDAMLVVDKGVSVL  
IAWDINMANRMGDADHILSYTDFGRQASDALRAALNLLAVPQGAKIAVPSSMPYPDYIEL  
VQAFEAFDLVCERSGIDMFIEMRARKDADETFYRRIASYPDQLMDMVEKEIAAGMLST  
ELDVALFLEREARRMGAEGMGFETLAAGPGRSFGIHAFFAFTSGPFANAGLSILDFGARF  
EGYTSDDVTMSFVSDVLSQEQTMDLVEEAHRIAVEACGPGVPLLKVATLVDDLFFKAGW  
FMPHSLGHGIGLDAHEAPMLSMRASPEALLQPGHIVTIEPGLYHPEFGGVRLNDVLLITE  
TGAEVLTHSRIVRL\*

>SPBDM4\_v1\_40482|ID:27157787|argD| Acetylornithine aminotransferase [Uncultured spirochete bdmA 4]  
MKERFMNTYARTGLVLDHGGARLFAADGTEYIDFTAGIGVNSLGHGHPKLVAAIAAQAA  
KLMHVSNYFMTPPSMELADRLTEATGFDTVFFCNSGAEANEGMFKLARKYGS�KNPDKNV  
IVTLKQSFHGRITITVTATGQDKFHRFFGPFPGFAYVEPEDIGALDALLGPNVCAFVFE  
PIQGGEGVRLISKGYLQAAEKMCRRERDILFCADEVQTGIGRTGALLACERLGLRPDVTAV  
AKGLAGGVPVGAILARGAAADVFPQGDHGTTFGGGPLAASAALVVLSELDSPGFLDEVK  
KGRHMLSLVEGLRHPLVKDVRGMGLMVGIGVVDPHEVVDAARAHNLLVLTAGDDTVRLL  
PPLVITMEDIDAGAAALKLALDDVEKAHG\*

>SPBDM4\_v1\_40483|ID:27157788|argB| Acetylglutamate kinase [Uncultured spirochete bdmA 4]  
MDDQFNADVLEALPYLRRFSGKIIIVIKYGGAAAMINEGVRQTVIQDLILMQQVGMKPVLV  
HGGGPEIDRMLKFKNKETVSVEGLRYTDDDETMEIVQMVLAKVKNKDLVELFSRTGGKAVG  
ICGSDGGLFMAKRLRKNQDLGLVGDIAVNTEMVRVLLDNGIIPVVASIALRSDEECGF  
YNVNADTAAGALAIALKAEKLLITDVPVGMEDKTDLGLTLIREMDVQMAKTLMKKGVKA  
GMIPKVEGCLQAIAQGVSAAHIVDGRSPHLLVELFTDTGMGMTMIR\*

>SPBDM4\_v1\_40484|ID:27157789|argJ| Arginine biosynthesis bifunctional protein ArgJ [Includes: Glutamate N-  
acetyltransferase ; Amino-acid acetyltransferase] [Uncultured spirochete bdmA 4]  
MKQTRGGITAAKGFASGIHVGIKRNREKKDLALIWSEVPCAAAAYTTNRVKGQPLIVT  
EEHLADGRAQAIIVNSGNANTCTGEEGMKAARRMTELVAQNMPVKAEDVIVASTGVIGQQ  
LDVSVIEAGMPELVQALSKGGSIDAREAIMTTDTMKKEIAVVEEIGGVLTIGAIKGS  
MIHPNMATMLGFITTDCAITSPMLDKALKDVVRKSFNRVSDGDTSTNDMVAVLANGMAG  
NPPIEKEDVNYGEFRDALEFVCVELAKMIARDGEGATRLVECTVSGAVSEDQAEALAKGI  
ITSSLVKAAMFGADANWGRILCAMGYSRDDDFDPKVDVSFESPRGYIEVCRAGAPLPFNE  
ERAKKILNNQEVEIIVDLHAGDAEVTAWGCDLSYEYVRINGDYRT\*

>SPBDM4\_v1\_40485|ID:27157790|argC| N-acetyl-gamma-glutamyl-phosphate reductase [Uncultured spirochete bdmA  
4]  
MIHVIGILGATGYAGLELTRILLQHPRVDRLSASSVSFEGKSLEDVYPSMVNRQDSVALPA  
LEKAEKVIKAEVVFSCPLPHGHAEAEAGYQCVTASPKFIDISADFRFGPHEDTFKKWYGAG  
YHYPDLHAQAVYGLPELHREAIESARLIANPGCYPTS AELGLMPVIEGIVDLSSIVITS  
MSGVTGAGREPSQTTHYPEAADA VSPYKVG AHRHQPEIDLLLSEMAGTSVQSVFTPI LAP  
MNRGIVSTICFRLARHLSVADLYAIYAKRYAGEPFVRVLPLGSTASNRFVKFSNYCDISV  
HLSADGERAVIISAIDNMVKGAGQAVQNMNILLGFEETEGLRFIPPAF\*

>SPBDM4\_v1\_40486|ID:27157791|hppA| putative K(+)-stimulated pyrophosphate-energized sodium pump  
[Uncultured spirochete bdmA 4]  
MLSSGVIVAVSTALVALVYSLITSSSIKKIPLYNSTVARISGYIEEGAHAFLTREYRTVS  
LILPVIALLLFALNGGILKLSISFLVGAALSASAGWFGMSIAVKANARTAEAAQKGVLP  
ALKIAFSSGSVMGMTVVGLVLLGIGGILGLLLLIPNAETMLAETIFPIVSGFSLGASMMMA  
LFARVGGGIYTKAADVGADLVGKVEVGIPEDDHRNPAVIADNVGDVGDVAGMGADLFES  
YAGSIIGCMVLGIAVSASPQMLRLAILPLIAAGTGVLASLIGTLFVHLSRAKRPQTALN  
AGSLGAALIAIVLLPVIRFTVGTGHFLSGTREAGWLGIFYFACITGLVAGTAIGLITEYY  
TGSSTPPVRKIAKSCTTGAATTIISGLGVGMSSTVFPIVIGLAIGLSNQLAGLYGIGIA  
GLGMLLTLGIQLSVDAYGPVADNAGGLAEMSEMEPEVRKVTDSLDAVGNTTAAIGKGF

GSALLTSLTLIVAFLSAAGIPIETMNLANPSVLIGLFIGGMIPFFFSSLSMDAIYKAAFA  
MIEEVRQFRSKPGILEGTEEPDYRSCVDISTQTALKSMILPGVSAIAAPVLAGLIGGPA  
VLTGLLVGATVSGLLAIFMSNSGGAWDNAKKLIESRSEEGKGSAAHRAAVVGDVVGDPF  
KDTAGPSLNILIKLMAIISLVLAPLFRVTVWH\*

>SPBDM4\_v1\_40487|ID:27157792| conserved protein of unknown function [Uncultured spirochete bdmA 4]  
MANEKHLYMIVHPNHSLIASQLEPEHFHFKHYVQGSTRYFEGRLIFTEIDPEFRNPYFDID  
TAY AELKPHEDGRPKATKFIKSYRVMEMDYGALGKLYISNSLGDYVELESKPYEPSIDT  
DEFRIMLEVSPLRFIVLTKLNCHDFGQFITDPRNSKGAPKMAFTLLEFDAQEFLKEYEEN  
PLIRCYVPGIHPARLVSAIEEVRTTPGKVVKGISLDCPIDRISYKYLKEGFMFAENGGKPC  
KFYPYLDLDTVERKFKYKFWKSM\*

>SPBDM4\_v1\_40488|ID:27157793| conserved protein of unknown function [Uncultured spirochete bdmA 4]  
MELNVGLVAEKEIVVEEKHVASHLGGGVPVYATPSMVLHMEETSQRQAVDHLGPDGATV  
GAYIAVKHLAPTCKGMKVRIRSELVKVEGRLLTFKVEAWDEVEKVGAEHVRAIISMAKF  
SERLEKKKKAAAQK\*

>SPBDM4\_v1\_40489|ID:27157794| Alpha/beta hydrolase fold protein [Uncultured spirochete bdmA 4]  
MWLIIVYAGLIILLVGMTYKFMFRLKPRSLEFTKQYSLAHGEIDEAFLDLDWKEWFEFDS  
PHGYVLKGGQYLRGKEDAPAALFVHGIIWTRYGMAKYMRFIEWGWNVAAFDLAGHGESAA  
PRRFYPSYGFYEKFDVQAGVKELHSLFPEAPLYGLFGESLGAASALEYAPLAGSAASRGV  
DFVVADCPFSSAWDELMEHYRMAHVPNFIAWPAAHVSRWLVRFLHGFIDIEEASPKKAVMQ  
TDMPILFTHGMEDRDVPTIMSVRMASARMANNVGMTELVLIPGATHAKGILTDKARWLAG  
VTAFIDRVCSEKNSAHMSGQRGV\*

>SPBDM4\_v1\_40490|ID:27157795|msrB| methionine sulfoxide reductase B [Uncultured spirochete bdmA 4]  
MVYSEKDANTICYIQPTEELKAKLSPEEYAVLVEAAATEPPFENTFWNNHRDGIYIDKIDG  
TPLFASTTKFDSGTGWPSFWKPLDENALILVDDYSLGMHRIEVRACKSGGHLGHVFDDGP  
NPTGLRYCINSASLRFVPKEDLELEGYGALLSLFR\*

>SPBDM4\_v1\_40491|ID:27157796|trpS| Tryptophan--tRNA ligase [Uncultured spirochete bdmA 4]  
MEKKRILTGDRPTGKLHLGHYVGLANRVRQLQDDYECFFIADLHTLTTKPEKENIEQLS  
ENIHSVLDYLSVGIDPKKSVIYLQSAVPEVTELSLFFENLITVPRLSRVPSLKEMAQNA  
HIEEMPFGLLGYVPLQAADILLPRAHLVPVGKDNEAHVEVTREIARRFNFLYGETFPVPE  
VMISEYGSVLGTDGNAKMSKSLGNAIFLSDDAKAVQKRVMMSMYTDPNRVRADIPGTVEGN  
PVFIYHDAFNPKAEVEDLKARYRAGTVGDVEVKEKLASAINAFLDPIRERRAYYESQKG  
LVEEIIYEGTMRMREARITLSMAKKAMGLSSVWNRISRKAEDRRKRAAE\*

>SPBDM4\_v1\_40492|ID:27157797| putative Diguanylate cyclase [Uncultured spirochete bdmA 4]  
MKIDISTINALFTDSSLSGFFAETDLFYIDFQSGTARSCYTLRSLGYEDNDLLNITSPFS  
VQEADKERADRLIHRLIANEADSVIDAFRVASKDGSYHWRFRSTRVVSRAEGRPEAII  
GHVLDVDDLITSQEEIRDRLVEIDAMRELITAINKSLDFEETFLRIIEQLHRIIPFDRAS  
AQSLNDRLTVVAGFGYREGLEGLTFPAHGIENPSVRALQEHKIVICNNVPEEFPGFIR  
PNNDFITLSWLGIIPIYKVKVIGLLALDNQALNAYNDQHVRIVSSLADYIAIALEHARKH  
QLVITYQAMTDRLSGLANRYGLETQGMIEFQKSIEQDQSIGVLMIDIDHFKQVNDTYGHAY  
GDIVLRSITQAIREQIRSRDYAVRYGGEEFVLLPGLSAREALIVAERLRIRISQTVIEK  
ERRLPVTSIGIYAAVPGPLDILHEFIRRADLALYTAKEAGRNRSRVWSTSPEFYVNE\*

>SPBDM4\_v1\_40493|ID:27157798| putative Methyltransferase type 12 [Uncultured spirochete bdmA 4]  
MESKEGPKLKLDTTLVSRLSFWDYDISVSLGLAIKKYKNVKIIGENVRALQRGLTGDRTRI  
ASGYMDEQSLQAYLLYYWAVSLFEVTMVLEELDARARLPHELHVLDIGSGPGPASFAAN  
VFGARRAFLVDKSQKALATASEIAAEARREHSDFEILTRYANLEEFRVPAGETFDLIVAS  
QSLNEMWHDVPDWLERRRDFVLRLLPSLRAGGILVIIEPSAHYTSIPLALRDRVLESIG  
RQEPHEIAAFTGGAQIACAGPCPHSGSCPMRTLKGRPCFSEWQWEAPPLVNELANFAGLD  
RTSLKAAWVAFKKTTPETGRAKAEGARNMPDTPAKSGSLRGRIVSEPMRNKAGRIRYIVC  
TDCGLLTISAPQGDPEARSLGFFQLARGDLLEADGLEARGDAHLGIVRGTRIHITMKAP  
RI\*

>SPBDM4\_v1\_40494|ID:27157799|hndD| NADP-reducing hydrogenase subunit HndC [Uncultured spirochete bdmA 4]  
MVNVKVNIGIPVQVAEGSTMLEAAKKAHVKIPTLCYNPDLSPWAACGICVVKVEGSNKMLR  
SCCTPVSEGMSIITNDADLVQTRRTVIELILSTHPDDCLFCPRNQSCELQTLAQEFGIRE

QPYKKMVRDIPTDTSTNSLILNPSKRCIRCGRCVEVCQEMQGVWAIEFLGRGESIRIAPAA  
 DVKLGDSPIKCGQCSAHCVPGAIYENDQTSLVWDALMKEGPDAKICAVQIAPAVRVALA  
 ESFGLPPGTDLTGKIYTALRRLGFDAVFDTNFSADLTIMEEGTELVHRLTEALKGGMQQA  
 TADHKLPLITSCCPAWVDYMEKYYSDMIPNFSTAKSPQQMMGVMIKTYWAAKAKVDPAKI  
 YSVSIMPCTAKKFENGRDESMYSSGYKDVDVTLTTRELARMIKQAGIDFLNLPDSQPDS  
 LGPYSGAGVIFGATGGVMEALRTAYFLVTKEELKDVNFTAVRGLSGIKEATVHINGIEL  
 RVAAAHQMGNIA TVLEEVKARAEGRETPWHFIEVMACRGGCIGGGGQPYGATDEVKRLR  
 MRSIYDHDEKSEYRCSHDNPYIKQIYAEFLEKPGSHRSHELLHTHYVEKPLYLK\*  
 >SPBDM4\_v1\_40495|ID:27157800|hndC| NADP-reducing hydrogenase subunit HndC [Uncultured spirochete bdmA 4]  
 MAYKNFILVCGGTACESSHSEEIYRNLIKEAEALGVSRDVQVVKTGCFGFCEKGPIVKVL  
 PSESFYVEVKPEDAHEIIAEQVIKGREVTRLLYRKDKKSDTARLEDIEFYQKQFRIVLRN  
 CGVINPESIDEYIARTGYRALEKALFEMTPEEIIAEVKASGLRGRGGAGFPTGMKWEAAR  
 KSPGDIKYIVCNADEGDPGAYMDRSTIEGDPHSILEAMVIAGRAVGANFGYIYIRAEYPL  
 AIERLKIAIQQAKDYGLLGKDLGSGFDIEIRLGAGAFVCGEETALLQSIEGKRGMPR  
 PKPPFPAIKGLWGKPTVINNVETLANVPVVLTRGANWFSSIGTEKSKGTKVFALTGKINN  
 SGLIEVPMGTTLREIIFDIGGIRNGKFKFQVQTGGPSGGIIVEKDLDSPISYESLTALG  
 SMMGSGGMIVMDEDDCVVDISKFYMAFCVDESCGKCACPRIGTKQMHGLLDKISKGQGED  
 SDLAKLEQIGKAMTKASLCMLGGSAAANPTLSTLRHFRDEYLEHIHDKKCRAGKCKDLVIY  
 EIDPAKCIGCGLCARRCPVPCITGEKKKPHVIDGSKCIKCGECYAACKFGAVIKR\*  
 >SPBDM4\_v1\_40496|ID:27157801| NAD(P)-dependent iron-only hydrogenase iron-sulfur protein [Uncultured  
 spirochete bdmA 4]  
 MAKMTLDHLRALRAQKQGELEKRNVEGKDIQVIVGMGTTCGIAAGAKQTFDAIVA ALEKHN  
 MTGKVVRQTGCMGLCYVEPTVEVMPDMPPIYVGKMTSDVAEDLVVKHLVEHSLDLSHI  
 FDRPAIDIVKH\*  
 >SPBDM4\_v1\_40497|ID:27157802| Histidine kinase [Uncultured spirochete bdmA 4]  
 MHCTVGDVLDVVQNSVEAGSNLIEVEIDDAHDGVLALIADDGCGMSPEERARALDPLRN  
 SGAKHPGRKVGLGLPFIQQA VEQADGSFSLKSEKKGKTEVRRFFFPASNIDSPPAGDLVSL  
 FVATLSMAGACEMKLRTRARDGLSYEVKKSELVEAVGDLASASSLSLVRQFLASQEEG\*  
 >SPBDM4\_v1\_40498|ID:27157803|hndA| NADP-reducing hydrogenase subunit HndA [Uncultured spirochete bdmA  
 4]  
 MVAGDIEFSNELQSYIDEWSKKEGGLVMMLHRIQNEFGYVPRAAAEKLSLISGIPLAKIY  
 GVITFYHFFKTTKPGKHRIA VCLGTACYLKGGQDLLEETCSILSIEPDEMDDGLFSVDE  
 VRCLGCCGLAPVLMIDNEVYGKLTKEQLPGIIAKYRSL\*  
 >SPBDM4\_v1\_40499|ID:27157804| conserved protein of unknown function [Uncultured spirochete bdmA 4]  
 MANSEKNKVSELNNRAVSLIDAGRYQEIDLTKALS LDPLRTGILFNRAEAHRLSGNV  
 EAARRDLLSDLHIVPDSPEVLHGLGLLAYEQDDFSLATDFYKKALDKDPAFTPAWNDLGV  
 VEFRAEHYDSARTFFEKATTL DAGFSDAWFNLADTYDELGMADKRAYAREQLRKARLRSG  
 EKPDSEEDE\*  
 >SPBDM4\_v1\_40500|ID:27157805| putative Serine/threonine protein kinase [Uncultured spirochete bdmA 4]  
 VKAGDTIGSYVLERRLGRGVTASTWLARRAQPDSGSGAESPLVLKIFDIAETDSWKPLDQ  
 FKREADILRTL SHPRIPKYIESFDATLEGHFLFVLVMEYIQGETVEAYIASGKKFTEEHI  
 EQILAELADILAYIGSLRPPIVHRDINPRNLIAQPDGHVALVDFSGVQDAIRTALYPGAT  
 LVGTAGYIPVEQVSGRATHRSDLYGAATTTVFMLTGRNPAELPMRNLKIDLSGLLYMSPR  
 LSYVLDNWLDPDPDRRFLSAAKSASILRGESAIPSAASGASRSETSSRQSERAGQTPRSI  
 FTDILHSFEHQSEPREYPEELPSDSTLEIQALDPGLYIKMPRRRRGASSGFSVFPVWIG  
 FIFFWTTMTIRMHAPIFFSIPFLIAGVAMVKSFLNPSITDTELFITPDGLLKKNTSFISN  
 SAQQFRISDVGKARVRRSSMQENHRYLKELAEAGTGTLTFGLGLSDRELYFLEKRVNEE  
 LARLKQLLPPGTAS\*  
 >SPBDM4\_v1\_40501|ID:27157806| putative enzyme [Uncultured spirochete bdmA 4]  
 MNMSANLNPRPVSVSFVEMDEIVQPSDLNINGSIFGGYLSLMDKAGGISAFKHCNVNVV  
 TVSVDQLVFKNPAPAGTVLSVKASVNRAFHTSMEVGILVTGLKPGESKETKLCSAYITYV  
 AIGADGRPIVPPSLPETPEQIRRFREAEVRRSARLALAERLAAQQ\*  
 >SPBDM4\_v1\_40502|ID:27157807| Transcriptional regulator [Uncultured spirochete bdmA 4]  
 MENIEEHAFFRYLTYSDEDERWEMVCTDAGYTEVPPYTIYPPNKEDHPRMFQRVAVGRTL

NEYQIIYVTKGEGIFETSGRRYEVKPGSIITVFPGVRHFYKPVYEVGWMEYWVGFKGGHF  
 ELLRERGFLLNPQQPFVEIGLQNDILDLYNEIIEEVRDQKPLYQIVASAKILSLISEINAC  
 ARKAQTSHAAQIVESAKFIMAEEKIYGDIDISSIASQLGISVSRFNDIFKTYTSMTPYQY  
 YIHIKIHAASKLLEQGDLVKEVAYRLGFEDQYHFSRLFKQKTGIAPSQWRVFMYE\*  
 >SPBDM4\_v1\_40503|ID:27157808| conserved protein of unknown function [Uncultured spirochete bdmA 4]  
 MIGNSTVNPVAVGLFGIGLDTYWAQFPGLEERLKGYYQAETRATLEQAGARVIDAGLVDTVE  
 KARAAGALFREKRVSVVFLHITTYALSQTVLPVAREAGVPVVVVNVQPSKKIDYEFNSL  
 GDRALMTGEWLANCQSCCVPEIANVFNRRNGIPYHMITGFRGEAFVERELHGWWQAARVAE  
 ALRRTNIGILGHYYEGMLDVYTDVTRMAGVFGSQFDIEMDYLAQLHKKVDPTQIEAKIA  
 QFRREFEVVPECEESELVRAARTSCALDALVNEKELGALAYYYEGTAGNVHQDIVTSVIA  
 GNTLHTAHHVPVAGECEVKNELAMKILDLLGAGGSFSEFYLDYEDDVVLWGHGDPAHSA  
 IAEGKVKLPLPLYHGKPGAGLSIQMSVRHGPTVLLSVVEGAGGKVFLTAEGESVPGPT  
 LQIGNTNSRYRFPLSAREFSEAWSKEGPAHHCAGVGHVASTLEKTAALFNIECHRIC\*  
 >SPBDM4\_v1\_40504|ID:27157809|rbsA| fused D-ribose transporter subunits of ABC superfamily: ATP-binding  
 components [Uncultured spirochete bdmA 4]  
 MADYILELRHISKFFPGVQALKDVHFQLKPAEIHAIMGENGAGKSTLIKITGVYQPDEG  
 ELLFNGQPIHFKSPLDAQRRGIAAVYQHVACFPDLSVLENIFLGHESFDSVTHKIHWRLE  
 RKQAESLLQSLDADFSPSATMGSLIAQQQIVEIAKALSVDKILIMDEPTAPLSRRECE  
 DLYRITENLRDKGVSIIFISHRIEDMYRLAERVTVLRDGRYIATWDVPGLEQARLVQGMV  
 GREITQYFPSRHATIGEEIFRVEGLSRIGFFKDISFSVRRGEIVALTGLVGAGRTEICES  
 IYGISPRNGGRFFLEGKEIAIHPTAEALAHGIGYLPEDRMKQGLVLDWDLIKNITLASLK  
 NFSRRGFMQPSREKDIALRLTDNLKVKTSHIYAKASTLSGGNQQKLIVAKLLTSKLLII  
 LDEPTKGVVDVGAKTEIYRIMNQLAEEGYGIIMISSEMPEVMGMSDRIVVIREGRKSTEFE  
 TPQATQEAILASMTAHGRELHAIAG\*  
 >SPBDM4\_v1\_40505|ID:27157810| Ribose transport system permease protein RbsC [Uncultured spirochete bdmA 4]  
 MQLQVKMNADGSSGGGNGRPSSEHQSSSLFSSLVKRLTRNSEAFRELGLLIFIVLLAA  
 IFQIRNPKFLSVANIKDLLANTAILSILAVGMMMVIITRGIDLSIGSTMALSGMVTSLTV  
 SANPDISPFLSLAQGMAIGLAAGLVIGVLVAYFKILPIATLGLMNILRGLTYLISKGKW  
 VSA YQMSAGFKNLSTGTTFGINNLLFVIGIYILYTYFINQTRTGRIYIYAVGSSPETAEL  
 IGIKRKRILLVYALMGLLAGLAGVLWVSKFASAQGD TAVGYEMNVIAATV LGGVSVAGG  
 RGKVSGILLGSILFGILANALPLINISPFWQQFIQGLVILAAIISNVLLQRRNDRLTLKK  
 RVI\*  
 >SPBDM4\_v1\_40506|ID:27157811|rbsC| ABC transporter periplasmic subunit [Uncultured spirochete bdmA 4]  
 MEKTSIDINKPRGLHQYQWEIFLIVLFLAVNVVNSFLSPYYLTLDTFVSTPMNFLDKAFL  
 VLPMTMIILGNIDVSVGSIVALSSVLMMAVSYNAGLPMPLAMVLALLVSTTCGFINGFLQ  
 IKFKELSAITLSTMTVFRGIAYVILED RSAGKFPWF SFLAWGYIGKIPFILIVFALT  
 AIVFAVLLHRTRFRGMVYAVGSRNTACEYSGIRTDRIILGVSMLAGLMAGFTALFLT SRM  
 GSTRPNVALNYELDAIAMTVLGGISTNGGKGRITGPLISIFLIGFLNYGLGLRNVSAQVL  
 LIILGFLILSVLVQNFTDRPASISPKKLSAPTHRS DAGDGS DIHENSAQGG\*  
 >SPBDM4\_v1\_40507|ID:27157812| Sugar ABC transporter substrate-binding protein [Uncultured spirochete bdmA 4]  
 MKRTITVVALVLLALTLVIPSSVFAAEKAKFAIVFKNTGNPYGEKQLEGFKVGIIEEQGFE  
 AILRSPDLPTAEAQIQIEQLIAQKVASICIVGNDYDALTPVLKKASAQGIKVFSLDSSV  
 NPQARLTHVNQADSEKIGQTLIKAA YDMSGGKGEIAILSATSQASNQNIWIDFMKKELAK  
 PEYKDLKLVKIA YGDDL RDKSVSETEGLLSYPNLKVIIAPT TVGIAAAGKVLTDKGLKG  
 KVFLTGLGLPSEMAEYINNGVCPYMF LWNPIDVGYLGSYVGTALVSGKITGKVGDKFSAG  
 RLGNYTITKAPDGGTEVLLGPPFKFDKSNIEDWKKVY\*  
 >SPBDM4\_v1\_40508|ID:27157813|rhaM| L-rhamnose mutarotase [Uncultured spirochete bdmA 4]  
 MKRNVFAMQLKPGNEAEYKRRHDEIWPELKAELRKAGVSDYSIYLDPQTLRLFAIQSLAD  
 DETNDLLPQNPIVRKWWDSMKNL METNPDNSPKVWALNEMFHMD\*  
 >SPBDM4\_v1\_40509|ID:27157814| putative bifunctional rhamnulose-1-phosphate aldolase/alcohol dehydrogenase  
 [Uncultured spirochete bdmA 4]  
 MNLDPIVQLSRNFGSNPDYVLAGGGNTSQKEGDFIAIKASGVQLGTIDAAGFVRLSLSKL  
 TALFNIELPSNSDEREKIVLEKMLAARLPGQTMRPSVETLLHALPFRFVHLHPALING  
 MLCSREALSAAQALFGSEAAVLPYITPGYT LADAVRRIFETR TL SGQSPYKILFLQNHG V

FVAADTAEEIKALYDHIFATLKAKVNALPAEDKVAESVSAEEKVLRSKVHTAVEACSTKF  
NVRFFFTLNSVVGHFLASPQAFAPLTAPFTPDHIVYAGAWPLFVTQHQAQTSEHLEVQIN  
AHHARHGELPKVLA VQGVGIFGLGKDIAAAERA CLLFTDAAKIAWYAQSFGGVHSMESPD  
IEFIRNWEVEKYRSSIASKNNAASKQ\*

>SPBDM4\_v1\_40510|ID:27157815|rhaA| L-rhamnose isomerase [Uncultured spirochete bdmA 4]  
MSRTEQEYKAAREIY AELGIDTDQVLKTLSSIPISIH CWQGDDVIGFDGATSLSGGILAT  
GNYPGRARNAEELRADA AFAFTQIPGKKR FN LHAMYAETGGEK VERSSLEPRHFNNVVAW  
AKEQKIGLDFNPTFMSHPLAASGWTLAHPDNNIRSFWIEHGKASRIAQAIAADTLKDFVV  
NDLWIPDGSKDMPADRLGPRLRLKESLDAIYAEKMPNDRVLDCVESKLF GIGSESYVAGS  
HEFYLYGAMQKAIGICYDMGHFHPTENIADKISATLLYVPYVVIHASRGIHWDSDHIIIW  
NDALTDVCREIVRMHVWDRVYLALDYFDSSVNRISAWIIGARSTQRALLYAFLEPVEAMR  
SEEERGF GARLGFIEESRSLPFAAVWRYYCENQDVPYGP AWIEDVKDYEEKVLSRRE\*

>SPBDM4\_v1\_40511|ID:27157816| putative Phospholipid/glycerol acyltransferase [Uncultured spirochete bdmA 4]  
MSDKENISLKKNRPDVKPGPYDVRASSSSTLSPAEDYDPEHEMNANRYAEIALQSKVPLF  
RFLHVAMKEDSLFLLPRILIRTIKTMRRIPSTFFIKDGALEHYVFRTIASWSKAVIKIT  
KMKLDVRGTEHLKPNQTYL FVSNHRSPADIPVLFATIPQHAAFVANAI FQKIP AISYWMR  
ASGSVFIDQGNPKSELRAFKAMTRRLKGG RSLILFPEGHMHQGKGLDTFN RGGIFSAVLT  
GTPIVPVCLYGTDKVIRPGSFHINPYKR VIVDIGTPLKTIDLGRAEKKDIDAI VQDIIAE  
KRSFYEEKYPAYKRAET\*

>SPBDM4\_v1\_40512|ID:27157817| conserved protein of unknown function [Uncultured spirochete bdmA 4]  
MAILYRGLPYPVIEWTEGDKCCSARWYSENV ALPPKRVQVDDRLPADIAYRLACEGTAL  
LWRGDFQ NARHLLKAITRRADRKS AKPGTTMSETFHL YRQAQSRKARVLGMLLIPLSADY  
SIPLRRAPDVRQACLEAYGPKGEESV VSLRGLQGVIGAH EWHKKGVKIPTLGG LIHPWYG  
VYAPIRSEYIDL VACVPLPTKVLAFDIGTGTGV LAAVLRHGVARVVATDISLRAIACAR  
ENLTRLGLRSQVDV VYANLFP EGRAPLIVCNPPWIPAR PSSIP EY AIFDPGSSMLRGFLA  
GAADHLEPGGEAWLILSDLA EHLGLRSREELDSWIEAAGLMVIDRLNVRPRHPKV KDISD  
PLHAARAKEVTSLWRLVARSEK\*

>SPBDM4\_v1\_40513|ID:27157818| MATE efflux family protein [Uncultured spirochete bdmA 4]  
MQRYL TDGRLFP SFMKFALPVLGSLFLQMIYGATDLVIVGRYADSTS VSAVATGSQV ML  
TITSITGFTMGETILIGQLMGARRERECAGAVGSGIVFFVILALVLTAIMVPFAGNF AA  
LMHAPPEAFAQTTSYIAICSMGFV FITGYNVVS AIMRGLGNSALPLL FVAIAATANIFGD  
LLLVA VFHMAATGVAISTVMSQGV SLLLAIVILKHRGLP FKFYRSDIRFDARSTFTMLRL  
GFPIALQDMMVGISFLIILMILNSMGLV ASAAVGA VDKILGFGLLVPSAFSSAIATFVAQ  
NMGAGKELRARHAMYYGMSGSLV FSLFFFFASQFAGETLVGFISRDALVIAAGAA YLKAY  
SWDCILVCFVFSMTGFFTGC GKTSFVMVQSLIGTFLVRIPFS AFMSRRPGVTMFQIGLAA  
PTASIVQILLCAVYLLSGKWRISST ERGSYGHSL\*

>SPBDM4\_v1\_40514|ID:27157819| conserved protein of unknown function [Uncultured spirochete bdmA 4]  
MRHEKIKIGEISKLFQIPQSRLRYWEDENLIHCERDATNNYRRYTLTNYFEVGDIVFFRD  
LGV SINELKNLSSMELEDLSRLLENEVKLDGRIAALEETKQKIRKKRHMIAEIGRLRAN  
SFTLCSPDFEKVIADPLFENS RMMPLQDVSSCAILLTQDRKEPRYGIIVSEVQPGNTVV  
WKRAIGAQRYAECLEISFDHPDNNNLATILHALAALGYRTGSLVGRY LASAFRTTWY EY  
YQSWIEVE\*

>SPBDM4\_v1\_40515|ID:27157820| exported protein of unknown function [Uncultured spirochete bdmA 4]  
MNVMRREKFGLV SPLNHNWNRKAYISFCLAFSAMSILLVFYACSTSSAVLPPPHPSGQTST  
FNRADFEHALAGRNL DVLASYSSKDSGSLGANLNSADREKAARRYEALRQELLIPASQA  
ALAPDLPSLAALLAKPEARHFTSFERAKLDSALARYAAVES PASKYRTGIVDPRISRITK  
TQLSNAARDPGHNLKAIVNALLSGESDPFLRIKLIHDWIADTVTYDVSMLS KNSVTGQQD  
LASVLASRRAVCSGYARLFEKMAELAGFEVKT VNGYTKGLGGDFAFDVRNSHAWNMVRIG  
DLWYFIDTTFDAGAFDS DGGSAQYHKRYSTDYLFPSPFQLRFTHFPDNALYQLSVTPTDK  
EDFKSRVLVSPEFFKNGLTVQRMPGATASLSSFA YLQKTSGLFSLDIEATEKMLVDASLF  
DAKGKELERYTFASHISPTSWRLIFAPPSTGRFKARIFAGPENPGNADSSPSILAGVLQF  
ELEMSSAGSKASASARSANPPFPKIYGRYHEPAGELLESPLDGS LAKGSTTHFFYH SKSK  
YVSIIDNTFVPLKRGADGSFSIDFKVPATSAIKLGVSEDNVRYSIVLAWDVR\*

>SPBDM4\_v1\_40516|ID:27157821| conserved membrane protein of unknown function [Uncultured spirochete bdmA

4]

MNGHDSVWQWIDDLPSAIGAALILIVGWGVAKILKIIVPKLLAWLKFDVLAGKVG VNEF  
LRKGHVQYAPSKLVGVFLYWIVMLFALAEASALDQRAAESIRSWLLGAIPTILASGITA  
VIGILIVNFFSNFVLTIMNNAAGVGSGLT VQRLIRVVG YIIVVVMVVDQLGLGQSIISILL  
LLIGSVALGVAIAIGLGCKDMARQYVENIIAAIQERERASHGTDLEG\*

>SPBDM4\_v1\_40517|ID:27157822| putative opine dehydrogenase [Uncultured spirochete bdmA 4]  
VKKTDWGGIVEHLDRVASKGKKMVWCVAGAGNGGIAMAGHLGILGFPVQMYNRTDEHLNA  
IRWYKIDIEGAVTGFSGVRLASSHIEDAIKGADVIMIVTPSTAHYGFATLMAPFLKDGQ  
IVVLNPGRTGGALEFRAALDRENCEARVVIVEAQTFIYASRMITRHRAHIFRVKNGVPVS  
ALPSFLTPAVLKVLDVAFPOFIAGSNVLATSLENIGAVFHPALTLLNVAWIESTGGDFEY  
YLQGISPSVAKVLQAIDDERLALARALGIRTVSAREWLYLTYDSVGADLCSAIRATTSYV  
GIKAPRTIDHRYVWEDVPM SLVPMASIGAMYK VETPAINLTIDLANLMNGQDYRANGRTV  
RTLGIIEGLSVEELHRLVTEG\*

>SPBDM4\_v1\_40518|ID:27157823| Cobalamin B12-binding domain protein [Uncultured spirochete bdmA 4]  
MYKVSQNDVVGLVKPAIDAHTLGILSFAQILRDCGIRVEIADEAVGKEIDTLAERGSIDT  
LTQWIRAKNISVLGFSYRLDPERGVEVFVRLVGLLQARLLARDGGPLRALWFAGLPPAC  
DRVVQRAPFVDAVFRGDESYQEILGSLGLPAHLVPEQASAELEYDKARLELGAEIVKNRV  
YLDVAPVDRSGSPGFGTRGERVADRVRHGAVHSLPPLMRAHVGPYAEDRKQAVAFFDWT  
SRLAKGGLLDVLSIGSSQLTQSNFGEDWSGLPNGGGVPINSAAEYRRVWQAARPMLVRTY  
AGTKRVPHMAKMHEEALDICWHALSLWWFSKLDGRGENTVMQNLEEHFETLRYIASTGKP  
MEPNVPHHFAFRGSDDVGYIVSGYVAAKAAKAQGIRTLVLQTM LNTPKYTWGIQDLAKAR  
ALRMLVRELEGPDAFVILQPRGGLDYFSPDMEKARAQLAAVTMLMDDIEPDNEASPQIIH  
VVSYSEGVRLADPEVVEESVRITRYALSEYRRLKKKGDMPEY GKLPIVETRTQYLYEEAR  
RMIDFVEATIPNTYSPRGLYAMMKGGVFPLPWSACKEEFEAAVNQP VQFMHGGVRTVDC  
EGKPLSVSKRLF GIARNLERMGFAPSDFQHMGSLRHARKGQKEAHSEKD\*

>SPBDM4\_v1\_40519|ID:27157824| putative D-alanine--D-alanine ligase [Uncultured spirochete bdmA 4]  
MILQIIMKRNSDPIIAAENAVGYARMAGIYNGAGFEAYFSYANEIDDIVSIISENRPDLV  
LCGMDHLPDKIGDVSISHNVHKWFEEHHVNYVGS DPETIERALSKAALKRRWEENGIRTP  
AFVFDGASQDYGSALERLVSLDAFPYIMKPENLGNSK GIDEDNIAWNADKLEPTLKRMR  
SRYGGAILVEHYLGA YPDVREITCAMIQGVEAMQCPAQISFLQPKRFHLITTNDKDGHR  
TVMSPLESKMAASFVPFARAAFESAGMRDYARGDFFFADGKLW AIEINGQPMIPDRWFEG  
AVQFAGLSEAQYLVGIVAAGYRRLRSKNRIAGSLPEGAQALLKGT VLGGF\*

>SPBDM4\_v1\_40520|ID:27157825|pcm| Protein-L-isoaspartate O-methyltransferase 2 [Uncultured spirochete bdmA 4]  
MITCNERKDERDFMVR SQIAARGIRNKR VLEAMRKVPRHLFAPLPYRAEAYDDYPLPIGS  
GQTISQPYIVAFMAEALLKGNERVLEIGTGS GYQTAVLSMLAKEIYSVERIAILLERAR  
AVLESLEIDNVQVWLGDGFFGWAEKAPFDAIILSAAPFDIPK TILHQLVDGGRIIPIGP  
LGMQTLVRMTRRNAHFDTEALLDVA FVPMRPGVSEI\*

>SPBDM4\_v1\_40521|ID:27157826| conserved protein of unknown function [Uncultured spirochete bdmA 4]  
MHAARNLRLCTKDCICLFCPTKATDTENGQVDFSKCLDGCRLCVDACPSHAIYLVNANY  
AEPAPKARRVSEKAFALLDRKAGEEAMVKQMLVKA AVPGKDAVNTANASAALVLKALEKS  
LRIVAEDAAREAA YMLPQSSSTQMLIETLLQDRPKCGEGQFPEQELRELKGLLSRT\*

>SPBDM4\_v1\_40522|ID:27157827| Rubredoxin (fragment) [Uncultured spirochete bdmA 4]  
MEHAYGPVFSNLAKACEKQFRTREAE LLWKLSGYFDGAVPSVGEVLSSGRADRAGPSLDA  
RKPASFQGLAAALAADETEHFDSIKTEATAAKDRGALRMTVW GSKVNAIQQSVVERYAKQ  
GDALLQDKSVFVCEACGFIFIGQEAP EICPVCKAPRSRFSKIS\*

>SPBDM4\_v1\_40523|ID:27157828|glbB| Ferredoxin-dependent glutamate synthase 1 [Uncultured spirochete bdmA 4]  
MQKHKNELYNYPKRHLQTGSLYKA EDEHDACGIGIVAELKKKANHRVIIDALSVLNLEH  
RGAVGSDRKTGDGAGILCQIPDRFFQKQMDLGRFFANIKTA HDLPYGLGMLFLPAGHSDF  
LKAQALISTVSAHRGFRILAWRDVPVFPQVLGERANASLPRICQAVFAKANIAEDQGDDV  
QDADGHLERELFLLRKYLEKEAKTAGFSLDQFYISSLSRTIVYKGMFVASQFASFY PDL  
EDPLFESQFAIVHQRYSTNTFPSWPLAQPF RMIAHNGEINTLRKNINSMKARQATMKSTL  
LGSDFFN DVPILEEDGSDSAIFDNIFELLVHAGRSPEHAFMMM VQEPFSERLSISKDKRA  
FYDFHAAMLETWDGPAAMGFS DGHRVGAALDRNGLRPF RYSLSKTGYFLGASEAGVLNLD  
ESEVEERGILRPGQMFLDLDSGRFIKDTEIKTCISRQKPYRRWLEANHIGLRGLFADQE



LHTHGERPVSTEEMTRRASYFLYGQETIRILKPMMLQKQEATSAMATKKPPAILSRTSVP  
LSAYFRQRFAQVTNPAIDSYRETVMVMSLENYVGTQKNLLEESPEHCRQLKLQRPVFSNSD  
IETLRS AKVPDFQVATVSMFLFQIHGEHIDLEQTLDDLCAEAAQKIDGGANLIILSDRGVD  
ADHASIPALLAVSALHHTLVDRKRHLA GLIVETGEARDIHETAALLAYGASGVNPWMAF  
ELIPSLAAQWNEGRGAEILADNYIEALNKGILKVM SKLGISTVSSYRGSRLFEAVGLSEE  
LVARYFRGTESRFGGIDMEDVAQDILCRHRIAFAREYKDNGAYPTTPLSQKEPAALPWA  
ALAVKLTQAVRSGEPEAWRAYADDMDSSLRPPFALRDLFGFRQATPIPLEKVQPAEIIQ  
RFSVAAMSLGALSPEAHEAL AAGANAIGSWSNSGEGGEDSERCSYKELGYSSENASKQIA  
SGRFGVTARYLATGLELQIKIAQGA KPGEQQLP GAKVNDYIARMRHSKPGVTLISPPH  
HDIYSIEDLSQLVHDLRCVNP DARIAVKLAAEAGIGTVAAGVAKAGADCIIVSSGDGGTG  
AAPLSSLDYAGSYWEEALPEIRQVLAMNGLDINTVIQVDGRLRTARDVVIATILGAREFA  
FGTLLSLLAMGCIACGQC NLGKCPAGIATQEPEFRAKFKGRPEHLAALFRYLADDVRVILA  
SLGAKSLDEIAGKYELLD FGARAATPKEK KLSLDRIVEALEIARRYPLLDTSASDEAGAP  
AIPLPPAGLRNFRPGAQLPFSISEAESQLLQKCEPLFSWTVAPSRLDLALSICNSDRSVG  
ASLSGQIIRAGLDLEPDTLCVNFTGAAGQSFGAFLVKGIFFRLYGEANDYLGKGLSGGRI  
VVQRPRESRCEPELNVIAGNVCLYGATAGEVYLN GTVGERFCVRNSGALAVVEGTGNHAC  
EYMTEGTVAVLGSTGINFGAGMTGGIAYVLEDEDQLFDTRCNASDIDVTGVTRPEDIERLR  
RIVERHYAFTASPRAKHILDEW DAYLPLFLKVTPLEH\*

>SPBDM4\_v1\_40524|ID:27157829| putative amidase [Uncultured spirochete bdmA 4]  
METGELDEFTVEALQKAMEAGELSATDIVEYYLQQIEAVDRGGPELRSVLVNP DARVIA  
KGLDEERHAGAVRGPLHGIPLLLKANINTADTMPTPAGSLALHGFIAPEDAPLVARLRS  
GAVILGKTNLSEWANFRSTHSSSGWSSEGGQTRNPYVLDRNPSGSSSGSAVAVAAANLCAA  
AVGTETDGSII SPSAISGIAGIKPTRGIVDAEGIIPISTQDTAGPMARTLRDAVLLDA  
MLGQWYSEFAQVQWIDRDRPLEGMRLGFAEKLSNFHPQVDQAMKTSVSVLTDLGAEIMP  
IDIETNEEV RNAEYQVMLYEFKNGLERYLAKYVADRGRGDSEESNGRKKRGQWPLTLQAI  
IEFNLAHADKVL PYFGQEILFEAAAKGPLEEPEYKALAAACQTFEREKGISAYAAKYGLD  
AIIAASNAPAWKTDYLLGDHYVGGNTSLAAIAGCPHVTVPAGFAGELPLGLSVFGVPFSE  
KTLIRVGLAFEHATCARRAPKFVPSFW\*

>SPBDM4\_v1\_40525|ID:27157830| protein of unknown function [Uncultured spirochete bdmA 4]  
MFVISMLLFLPLDLFGQVILVNP GIADRERLVYIERSGGTSQEIVQESRKIMRDGRAYFE  
VTGTSDFHQSR LRIDTSITHKPLY\*

>SPBDM4\_v1\_40526|ID:27157831| Transcriptional regulator, RpiR family [Uncultured spirochete bdmA 4]  
MPLVSTKIKETLPHMNP NFQKIGSFILDHDNKVAFTSIYTLSDALGTSTATLVRFAKSLG  
YSGYQSFKKELQEEIQHRLQPYEKVSLSKLGS LPEEKQLQRLIQNECNLRITLNNLKL  
DMETMIHAVKNARRIFIAGFGISRHF AHILQTTFLASQEKDVFVITGSVSDYSPLLKSF  
HEDIMFLMTFPYSAEVRHVADVTKGRGGYLCLFTDSASCPVYSHADVTVK CSTNSLLMS  
NSFVGLVSTIQVFIHMLLSGDHGGDNIRNGLEMQKLGYSIISNREETQ\*

>SPBDM4\_v1\_40527|ID:27157832| iadA] Isoaspartyl dipeptidase [Uncultured spirochete bdmA 4]  
MLVIKNAEIFAPAPLGKMDILIGGEKILAMEPYIDPAFLPGDIDELDASGMVIVPGFIDG  
HQHFTGGGGEGGFQTRVPELTVSMNFRNGVTTAVGLLGTDSL TRSVENLYAKTQAFNAEG  
MTAFMLTGAYWYPSPTITGSVARDMVFLQPVIGVKLALADSRGPHIDAKDLAALASDVQV  
AALVANKPGIITVHTGIRTQGLDLIFEIVEKFEIRPSIFVPTHINRKS GKLSDQALALAE  
RGCVV DATCHQELPEPDS PRLTAADFACIARDNGLFDHVSFSTDAGGSMPIWNQDHSRTV  
GMGVGTPSSLMFELNLLVNKKHIPLEALQPLTTTPARIYGLETRKGLSLRVSM DADLVVI  
DPASFSIRDVVARGAIAIKNKEAVKKG YFEA\*

>SPBDM4\_v1\_40528|ID:27157833| yliA] putative peptide transport fused subunits of ABC superfamily: ATP-binding components [Uncultured spirochete bdmA 4]

MTATNLRMRDDELLAIKDLSL SFPGYGYTQVLHNISFSVKKGETLAI VGESGSGKTVTM  
RRVMRL LGNVRTDSGQILLRKRNNQIIDITNISHKDATAIRGTDLSMIFQEPMTSLNPV  
TIGNQMLEAILVHQ RIPKAQAMQKVMELLE LVRFPDKSRRVNDYPPQLSGGMRQRM IAM  
ALASNPQILIADEPTTALDVTIQAQILALIKSLQNKLHISVVFITHDMGVVAEIADRVVV  
MYKGELVEENDVNTIFSTPSHPYTRALLKAVPKLGSMRGRSFPATLPVLEMSKELSRKAD  
DAPPEKTIDTADYTKQPLLQARNLTTHFVAEKTFFGRTHVVRVAVQNVNFDIYEGETLG  
IVGESGCGKSTTG YAILKL VPAEGKVLYKGDILALS ESQ LKH YRRDIQFV FQDPYASLN

PRIRIGAAIEEPLIHNIGTAEERKKRVEYLLDCVGIPIRAHKDRYPHEFGGQRORIAIA  
RALATQPKIIADEAVSSLDVSIQATVNLMLLELQKEFKLSYLFISHNMAVIERVSNRVM  
VMYLGQVVESGSRMQVFENPSHSYTKLLSAIPVPDPHSRNFNGMLSIGEIPSTIHRVSDA  
IPKIEYVEIEPGHFIASA\*

>SPBDM4\_v1\_40529|ID:27157834|yliB| putative peptide transporter subunit: periplasmic-binding component of ABC superfamily [Uncultured spirochete bdmA 4]

MKAKHLVLAALMVLTAAPVFAAGKDIYASDSTTKTLDPHNTSDTYSGAIERAICQGL  
LGFDKNMNIPLLAESYTYNDSATEFTFKLRKGITFQDGAPFNAKAVKVNIDRLMTGKYV  
RSSLMDPVKELKIIDDYTVKFLKQPFGAFLNALAHPGALMLSPAALAEKYGDDIGSHPVG  
TGPFMFQEWVSGSYVLIKKNPYWRGTVKVDSEIKFVPIPENGSRVAMLRAGQAQYIYMP  
AELLKLVENDPNIDVIKQPSIERYLIFNTKSKVLSDERVRQAINYALDKKAIINIAWGG  
AATEADSVFPAALPFFKKEGPWPYDLAKAKELMKAAGYPNGFKVVFLTPNASARLRATQM  
VQQQLQAIGITGEIQSMDVASFYDMLSKNKPDVTGDAQAFIAFGGWSSTGDADWATRPLL  
STEAFFPNMSNYGFFEDKTVDNLIKAGLTSADPKVRGTAYAQMODYIWSKAPWGYLFDVT  
LIAAKAKNIQGIYPMADGAFTVEEAEIVQ\*

>SPBDM4\_v1\_40530|ID:27157835|yliC| putative peptide transporter permease subunit: membrane component of ABC superfamily [Uncultured spirochete bdmA 4]

MLKYFIRRLSILPVLLVVSILVFLFVHLLPGDPARVVAGPDADEATINRIRTELGLDKS  
LPEQYLTYMGRFLFRGDLGKSLSSKLPVAQEIALRFPPTLYLALTSLAWSIIIGILFGAYA  
AMHRGKWQDYTAMIVA VSGISMPQFWLGLLLMQLFAVHLGWLPVTGFTGKFKELILPSLT  
LGASVAIIARFTLSSFLDFVQEEYINTARAKGLPERVVMWKHAFRNALIPVVTMVGLQF  
GFLGGSVVVETVFAWPGLGRYMIESVSRDYPVLQALLLLYSFQFVIINLLVDMLYAVI  
NPEIRYK\*

>SPBDM4\_v1\_40531|ID:27157836|yliD| putative peptide transporter permease subunit: membrane component of ABC superfamily [Uncultured spirochete bdmA 4]

MAEKTITPSMIFWQKFKKQKSAVVAGIFILLVFAVAFPIAPYDPYAIDYGNAMMPPS  
PQHWAGTDIYGRDILTRIIYGTRISLSVGISSVTIGAIVGVTGLISGFFGGFLDEIIMR  
SADVLFAFPGILLAIAVVAILGPGLVNVVAAVAIFSIPTFARIVRSNTLSIKESLYVRAA  
RSMGASNNRIMFVHIMPGTLSSSIVYFTMRIGTSILTASSLSFLGLGAQPPSPEWGAMLA  
ESRDYIGVADHLTIFPGIAIFLTVLAFNIFGDGLRAAFDPKLQ\*

>SPBDM4\_v1\_40532|ID:27157837| exported protein of unknown function [Uncultured spirochete bdmA 4]

MKRILLYSAILMLIALVPAIAQNEAELKTAYENAVKLAAPAPQDYTLNWQAAQAARKYGD  
YLVAHEVPGWKDTARAAAKEGIKYGEIAFKLNPTGIEGWYYYGLCVGTYSDCVSVVKALT  
EGLKGTQMGFENAYKFDKTYDNGGPILSLGRFWQVLPGIAGQDRKKAQELFDEYINLFG  
SSPDVNSDVWYFRGQLYKDTNRLAQARADLEKAASMGNNNAQKLLAEFK\*

>SPBDM4\_v1\_40533|ID:27157838|deoC| Deoxyribose-phosphate aldolase [Uncultured spirochete bdmA 4]

MITIEELARSIEYTLKPTVTKEMIELLCEEAKQYQFASVAVNPFVWSLCSKKLEGSEVA  
VCTGIGFPLGANTTEIKVVEAKRAVMQGAKEVDVVINIGKAKEGDWSVVREDIAAVVA  
KPAAVVKIILEACYLTDDEKIMASKAALESGADYVKTSTGFGSGGATIDDIRLMKSVVGN  
RMKIIKAAGGIRRLDDAMAFLEAGADRIGTSNGVSVINEFKRRFK\*

>SPBDM4\_v1\_40534|ID:27157839| Aryl-alcohol dehydrogenase (NADP(+)) [Uncultured spirochete bdmA 4]

MKYRYFGKTGLRISEISFGTQTFGWTTDKADAFRLDYVAEGGNYLDTADSNDGASEE  
ILGQWLKGRKRTDDVLIGTKVFFNEHAGPGSNEIGHSKKHIVHSLEKSLARLGIEAVDLY  
QLHCYDRGTDIETVMQTMEDLIRAGKILHYGISNFIPSIMKMVMLGHLRQCHRPVSLQL  
EYLLVRSPEWELLPLCEEEHIGTLAWSPLAGGWLTGKYQRNAPPENSrvGRNDREYDQ  
PGKRDGARTWAILDELKIAERNVPSQIALNWLRRKSSISSILIGARNLEQLEANMSC  
MRWDLSDDETRLLDQASDVNAPYPYSFISSYSRESYTREA\*

>SPBDM4\_v1\_40535|ID:27157840|eda| putative KHG/KDPG aldolase [Includes: 4-hydroxy-2-oxoglutarate aldolase ; 2-dehydro-3-deoxy-phosphogluconate aldolase] [Uncultured spirochete bdmA 4]

MNSIFDEIKKYKIVPVIKLEKPSDAFRLGRALLEGLPVAEVTFRATAAARDAIKLLRDQY  
PAMMVGAGTVTTIEQVDLARDAGAMFIVTPGFNPRIVDYCLANNIIIPGVNSPSQIEQG  
LERGLSLLKFFPAEASGGVKMLKALHGPYSEVSFVPTGGIDASNLLQYIQLSNVAAIGGS  
WMVKEDLISSGQFDVISRLCGEALTIVRQSHT\*

>SPBDM4\_v1\_40536|ID:27157841| conserved protein of unknown function [Uncultured spirochete bdmA 4]

VLKMKIIDGENISLEPLSEYSETRLRIQWLGGAGFLIDSKLGRIIDPYLSDSLAVKYSG  
KRFEHVRMMPPIVNPAAEIGSVRICALSTHHHTDHDESTIRAIASRNPDCFLVVPAAASRDN  
SKLSGIPKENIVAADAFSPMDIGDIRIYPIPSAHEELAIDGAGHHVFLGYLVSIDGLTIY  
HSGDCAPYAGLLANLAGFRVNIALLPVNGRDEIRKAAGILGNFTLNEAVQLAEAAGFDFS  
IGHHFGMFDENTIDIGQAEQMIQKKDAAHFELAKMGRMYEFR\*

>SPBDM4\_v1\_40537|ID:27157842| D-isomer specific 2-hydroxyacid dehydrogenase, NAD-binding protein [Uncultured spirochete bdmA 4]

MENIIVTPRSLSKGNNPLLARIKDAGYNLVFPNPGKQPTDELVEVIGDAVGYIAGVEPI  
TAAVLEKAEKLVISRNGTGIDNIDLETARKKNIKIRKADGANARGVAELTIGLILAAVR  
DIVLSDRSLKSGIWNREKGFELDKTLGIIGCGKIGQLVSRFALEFGMNVLAYDAYPNPD  
FHPSGNFRFDALRAVLKNSDIVSLHCPPLPKRPLIEAAEIAMTKHGAIINTARQSLVD  
EKALLEALDSGILHCYAIDAFDKEPPDDLAKNERVIVTPHIGGFTEESIQRATEAAID  
NLLESLQEA\*

>SPBDM4\_v1\_40538|ID:27157843|pgiA| Glucose-6-phosphate isomerase [Uncultured spirochete bdmA 4]

MDFDAIGKYMVPFDVLDLNEGILKGYTNHTIRRASSMWHYYQDESALETSINNGDPIHY  
EVFEKTVPEEYGHLMMGVSKLYAGTVGQEFFMTKGHYHAVAQTGEVYLCLKGSGYLVMT  
KDGDFALPMERGVLYVPPYWAHRSVNTGTEPLISFFVYNAEAGHNYGDIETEGFSKRV  
FNQNGKTIFV\*

>SPBDM4\_v1\_40539|ID:27157844| conserved protein of unknown function [Uncultured spirochete bdmA 4]

MTVNRLERASRPTFYFIGVTTLKSSIMRVFPQWMKYLNFGDVEIRGIDCLIHDNPQTYRD  
IVAFIKQDPLSLGGLITTHKMDLLAASKDYFEYLDPYAELLGEISSISKRFSQLRGHAKD  
PITSGLAMSFIPQSYWQSTNAELCILGAGGASLALTCYIMKQKKRYEWPSRIIVTNRSQ  
PRLDHMKEIHNIINPGIPVEYIHAREAVINDSIVNDLKPGSVVVATGLGKDQEGSPLTN  
DVIFPEHGIVWEFNRYRGNLVFLDQANKQKKDRYLTIEDGWYFYIYGTQVISEVFNSEIP  
TSGPVFDDLCRIAAEYR\*

>SPBDM4\_v1\_40540|ID:27157845|rbsD| D-ribose pyranase 1 [Uncultured spirochete bdmA 4]

MKKGRILNQKLSEAIASMGHGDWILVTDAGFPIPNSRRIDLALANIPTVQQVLSAILS  
DFVYERCIITLQKTNYPKLYSQIEAMIDRCPIETLPYSQFMSDFANKPKFFVRTGAFEP  
WGNIALCSGVDAPRWFLKDKGIIVPDYEEERVNYKEKG\*

>SPBDM4\_v1\_40541|ID:27157846|rbsK| ribokinase [Uncultured spirochete bdmA 4]

MQIENNSEISGMAPKIIVMGSFVADLMGRAAHIPVSGETVKGNFVKVGPGGKGANQAVAA  
ARAGGNVAMITKLGMSDFGDMAFNNFVNEGINTDYVFRSREFSTGAALIMVSEETGQNSI  
IVIPGACGQIKEEEVISAIDGLSPADILVLQLETNFEAIAESLKVGMMAKGLKVLMPAPA  
QEIPPEYYSMIDYLTNPETEASTLSGIQVNTIDDAKRAARILRSKGAKNIITLGEKGV  
ILDNEDHFLHPSFKVNAIDTTGAGDAFNGAFALALAEKDIVPATIFASAAAISVTRI  
GTAPSMAYRKEIDDFLSNNQPNR\*

>SPBDM4\_v1\_40542|ID:27157847|xy|B| Xylulokinase [Uncultured spirochete bdmA 4]

MQYIIAHDLTSGNKATLYDEAGKLVAASTIEYPTTIGPAGYVEQDANEWWNAVVLSTKK  
LLQISEIKNADIACISFSGQMMGCLPVDAEGNPLRPAAIWDAMRSEKQAAQLRALFDEKE  
FYKIVWHRPISSYTLTKLMWIRDNEPEVYNKTEKTLQAKDFIVYKLTGAFATDYSDASGT  
NAFDLIHKKWSDTILDSVRIRKDIFPEPYSSTTIIGHVTKEAAGLTGLAEGTPVVLGGGD  
GSCAIVGAGIFGGQKAYSILGSSSWVAFESDTPLYDEEMRYITWAHLDERKYQPCGTMQA  
AGLSISWLREVLAGYETYAEKHLGENALDIESSAHVSPPGSHNLIYLPYLLGERSPRWD  
PYAKGAFIGLTSKHTKEDIFRSVYEGIAYNLKIINAFAEENIYLKEITLIGGGAKSSLWR  
QILADVWEKPVLPVRYLEEATSMGAAIAGGIGIGIFKDFSVAEKLNPTV NKIMPDKSNIP  
TYKKLYPLFEQSYASLKDIFRKLED\*

>SPBDM4\_v1\_40543|ID:27157848|rbsC| Ribose transport system permease protein RbsC [Uncultured spirochete bdmA 4]

MKAHQPVQDSKEKKRFLKTEGTLVLLLLVLAFLVLTIFTRGFLTGNNSNLVRQTAING  
IVALGMTFVVISGGIDLSVGSVVGFAFILVALLMKSGVPIGLAVLASSISFLLGVANGF  
MVFDRIPPIATLGSMSIIRGAIMLISRARMIAGLPKPFLDFAQTYYLGLPALFVWLV  
LILFTIFLTKKTPFGRNVYITIGSNLEVARLSGINIRFTTYMIYGLSGLMAGIAGILMTSR  
LANGIPTGGQGYEMDAIASCVIGGASLSGAEGTILGTVLGAVIIATLRNNGNLLGIDPFI  
LQIVNGVIIVAAVYIDQYRKAHQK\*

>SPBDM4\_v1\_40544|ID:27157849|mgIA| fused methyl-galactoside transporter subunits of ABC superfamily: ATP-binding components [Uncultured spirochete bdmA 4]

MYQDSMYQVGMKSDYIVEMKNISKSFPQVRLSNVNLVKKGEVHALVGENGAGKSTLIK  
ILTGAYQKDEGTIVFDGKEVDVKDPHFSSKNIGIHAVYQDITLAMHLSVGENFFLGELPMS  
SPFTVDWKKVYSTANDVLASLDLKDIPHMLVRNLPVAKQEMVAIAKAIYEKSKLMIFDEP  
TALLTNEESEELFKIARLKSEGIGIYISHRLEEVRFCDAVTILKDGRYVATMPTKDT  
NEDELISLMVGRKIEEMYYFEHHNEPEVVLVSRNLTKKKVFQGIHFDLHKGEILGMFGLV  
GSGRTDIVLSIFGATKYDEGSISFFGKPANVRKPREAIELGFGLVPENRRTQGLALPLSV  
KININLLRYKKISHFGIVIDRNRELSNAKSFIQELSIKTPSEDAIVRNLSGGNQKQVIG  
KCLANQPKIMIFDEPTLGDVGSKEEIYTLLEKLTKTGTSVIFISSYLPEVIGVSDRIVV  
ISEGRQMGIIDRNEATEERIMKLSGIEENS AKIESEAV\*

>SPBDM4\_v1\_40545|ID:27157850| Periplasmic binding protein/LacI transcriptional regulator [Uncultured spirochete bdmA 4]

MRKRVAIVLFLVIALIPTFAQTPKRVAVIKATDSDFWQYVLVGATNYAKENPGKVVV  
TTYGPPSEADIDKQVAILEDVNSKPDIAVIASSTSSDATVPAIERAVKLGIPVITIDNKV  
NTNAVSSHLATNNIKGGALAADMLVERLKAMGKPLSGKVALISAMAGVQVLTDRDTGFLN  
RLKEVAPNLKVLPTRYIDNDIMKALAAAEDLFTANPDLVGGFADNNHSGDGVARAIKERN  
LGGKIAAAAFDSDPEEVQALSDGILYALILQDPYGMGYKGVDSALQALAGKTLPAYVDTG  
ATAVTKANMNEPKIKGLLDPMTLKK\*

>SPBDM4\_v1\_40546|ID:27157851| Transcriptional regulator [Uncultured spirochete bdmA 4]

MLIPADIDYFKNRPLDKSIPIPLYQLIEVLQNYINEHDNSFPIPTENDLCKTYEISRPT  
VRQAINELVAEGLIVRQKGRGSFINKKKIPQDFLLNIMSFNDEMOSKGLKPKETKVLTFCS  
RNPTPEVMKNLRIKSSDSTYFLSRLRSINGEPIVLVNTFLPSHLLKGIKQDMEKESLYH  
IIEYDFGYKILRTLRLTLEIRKAGKYEASSLNIKEGDPIHFIQTVAYIENDVPIEFSTAYY  
SGERNKFTVDVRIK\*

>SPBDM4\_v1\_40547|ID:27157852| D-tagatose 3-epimerase [Uncultured spirochete bdmA 4]

MRKIGIYYAFWTREWDADFFPFIEKIKNLGFDQLEINGGTFAVMSPARKRLGDEAKRCN  
ITISYGIGLTADHDVSSLDEEVRNGIQFMRSMEAVGKSGGGMIGGTVHSAWPSTLPKD  
ATDKRPYLDQSKKSMREMRVAEDNNVILNVEVINRFEQYLLNTCDEALS YVKDINSPSC  
RILLDTFHMNIEEDSIGGAIRKAGRYLSALHLGETNRKPPGLGRMPWEEIRSALDAIGFD  
GPLVMEPFIKGGQVGRDVAVWRDLIPNDYDKLAHDAASFVRKVLK\*

>SPBDM4\_v1\_40548|ID:27157853| Sodium/hydrogen exchanger [Uncultured spirochete bdmA 4]

LIKEIVGMLDFTLSPANFILVLAMILFLGTLGGFIFKLLRQPVVGYAIGILIGQTGF  
HLLNSKIITLSPISNIALSLIGFLVGAELKISVLKKGKQFTAILLFESITPFITVAFL  
VGLVSYLVTHQLKSSIALGLLLGAMSSATAPAATTDVLAENRTKGPLTTLLGIVAMDDA  
VALILFAIVSTIAGLLGERTGSLLSQLLAIYNITVSSALGALAGLLNLLAKWIKNDN  
GRILAFALGIILLTGVGLYLQLDITLSAMAMGFFIVNFAKFKTDNLFNVVDRFTPIIYV  
LFFVLVGAKINIWSISPFFAILAVVYVLARTFGKSIGSSFGAKITNAPDTRKYMKWCLL  
SQAGVAIGLSMSAGQMFPHTVGPTIIMITATTFIVQLIGPISVKHGVTKAGEVGLDVTE  
EDLIRESKVSDILAYEKKAPPLNDNATFEKVLETFSRQESLSSPVCSSDNKLVGIITDN  
LKEALLGDVAEGLLAYDLMPSEVTCKPDCSLLDVKEMFRTNNVDTIPIVGGDDGTFVGI  
IEQRSIEKYFHRKVLELHEKLSLEKTTLQPAQG\*

>SPBDM4\_v1\_40549|ID:27157854| protein of unknown function [Uncultured spirochete bdmA 4]

MRKIGIYYAFWTQEWVDVDFSPFIEKVKRLRFDLLEINGGTFAIMAPPARD\*

>SPBDM4\_v1\_40550|ID:27157855| Sugar phosphate isomerase/epimerase (fragment) [Uncultured spirochete bdmA 4]

VNEAEQCGITLSYGIGLTADHDVSSLNEETRQIDFMRTMIESVGHAGGGMISGTIISA  
WPRMLPKGATDKRPFLEQSKSMREMAKIAKNNNVMLNVEVVNRF\*

>SPBDM4\_v1\_40551|ID:27157856| D-tagatose 3-epimerase (fragment) [Uncultured spirochete bdmA 4]

MNIEEDSIGDAIRKAEGLLSVLHIGETNRKPPRLGRMPWQEIREALDAIHFDGLIVMEPF  
ITNGGQVGRDIAIWRNLIPNADRDLVRDAARFVRTLCD\*

>SPBDM4\_v1\_40552|ID:27157857| putative Sorbitol operon regulator [Uncultured spirochete bdmA 4]

LKTNKTKEVSEKAKIQLIVQICKLYYESNATQQQIADLYKLPRTSIVRIIEAGRQLGIVQ  
TRIVDPYSSREDLEIKIQQHFNLDKDVIVVSNFNPNPVLPTLLGQAAVEYIMGILVPNQT  
IGLGWGTISSFVSLGQQDILKYREFWVPLIGNLGETEIEFNMNQVKSISEKTGGYFT

SIHAPALVDSKQMKNLLTNSSSIKNTIDFWSHLDIAIVGIGGLFTGRLSHMPLHLKYYYP  
QEDRNEVFYSSAVGDILSRYDYDIEGNICDISINSRIIGIDIEALRKVPLTIGIAGGAYKT  
KAIIGALRGQYINTLITDETAAGICDYVEKNP\*

>SPBDM4\_v1\_40553|ID:27157858| Periplasmic binding protein/LacI transcriptional regulator [Uncultured spirochete bdmA 4]

MKKALLVMLLATTLVVIPAFAQKAPVLQSVAFATCQDLQNPFFNVMANAVKKAQDIGGSK  
VKVMAQSCDNDLNKQSQQIDDFIAAGAQIIVVNATDSNGIGPAVARAKAVGIVVIASDVT  
AAGGVDATMTSDNRQAGVITAEYIAKRLNYKGNVVAIIGDPNSSIDRFYGFQDVMKKYPN  
IKILSDTQNGHGRREASMTIMTDLTAFFPKIDAVWCINDPSALGAMLAIKQANRDKEMFV  
VGVDGSPDAADAMKQPGSIFAASAAQNPYYMAYHAVEVGVWQVMNGKIPANKTELIPVKLI  
TQDDVKAGYSGWPSK\*

>SPBDM4\_v1\_40554|ID:27157859| rbsA| Ribose import ATP-binding protein RbsA [Uncultured spirochete bdmA 4]

MDDLILEMNHISKTFFPGVNALKDVTCLKIHRGEIHSIVGENGAGKSTLMKILAGVIPPTKG  
ELILEGKPVKINNPRHAISLGIILINQELSILPDLTVTENIFLGKDKNNYGILKRHEMRE  
EARRLLDSIAAPFDTDILAGKLSIAQKQVEIAKALSNKTKILIMDEPTASLSEKETENL  
FNAIIKLKNKGLTVIFISHRLVEILKISDAVSVLRDGNHIGDLNKEEISEETIVSWMVGR  
KLTDYEHDSNTMVPNAFVVDHYGDDAKTKDISFSVGRGEILGIAGLVGAGRTELCRLI  
FGIDKKKHGNLYLNGKTIKIKAPKDAIQEGVAYIPEDRKLGLFLYMPVADNICMNILDD  
ISTLGVISNKKINTIASAAVKNFNKTPSVLRNAVFLSGGNQKVLISRWLQKTPKVLIL  
DEPTRGIDVQAKSEIFKLIKLSLQGVAIIFISSDLTEIPLSQRILVMRSGKIVAEKLD  
RNEFKQETIEYATGLRPDSYHYEYK\*

>SPBDM4\_v1\_40555|ID:27157860| rbsC| Ribose transport system permease protein RbsC [Uncultured spirochete bdmA 4]

MQTKEATNNNTVFKIILSKFGIFILLFVIGFSIISPNFRFTFNNMMNIFRSVSINLVIA  
TGMTLVILTGGIDLSVGSIVALSGVVALRFSVTNPGFAIPAALLVGVFAGLINGVLIQFV  
GLPPFIATLGSMTYLRGIAFLCNGNSIINNKLPAWIGNSYLGPPFWLAILALLIFLLG  
WFLLRGTTYGRIYAVGGNVEASKNTGIRVWSILLSVYALSGLCAALSGVMISSRLYSAN  
GLLGQGYEMDAIAATILGGTSFSGGKGNLTGTIIGALIIGVLTNTGLTISGVSYWQVVK  
GIVILAVVIDIVRNKISE\*

>SPBDM4\_v1\_40556|ID:27157861| putative PfkB domain protein [Uncultured spirochete bdmA 4]

MKISAAGSWIMDIIYNIDPNKLDIFKSYLINKDNPNGIKRGGACLQHAVESHYQKNIMDI  
ISEFSDVSTENKKLGGVAIAAIIINTAQVLFGENIDVSFYANLPNDENGEFLYDIKKTP  
RINRIRKTEKCPKTFIINENVDCLIQERSFITVENAEALSLSLDELNDNFYKSDIVLI  
SCPHWEREINNNTSVLKKCKDEGAFTVISTAFNPIYANYSGKWTLGDSDEVFQYIDLLI  
TDKEEAYVYSGANDLQNAKRFYHHKGVKIFVVTGVPVNFYYS DGSIIKQEGFISISEE  
IIEKESGLLSCGDTVGCNDNFAGGVVASIALQMKRQESLDILKAIRLGNVCGAFATYY  
GGVYPEKYPGEKKEKIKHYNEL\*

>SPBDM4\_v1\_40557|ID:27157862| fbaA| Fructose-bisphosphate aldolase [Uncultured spirochete bdmA 4]

MPIVSMRELIKDAQNRCYAIGNHNSIDYEAIKGIILAAEEMKAPVIIGIAQSQDLNLPVD  
TLSSILLHEGKKAKTSIAIHLDHSTSFVVIKVIDLGFNSVMYDGSQLPFEENITNTIEV  
VKYARKRNVAVEAEIGKMINTENAKYNELTSSDNDKNDYTDPSIAQEFAERTGIDMLAIS  
YGSIHGLHAKKPTLNFALEKIHA AVSIPLVLHGGSGLDTSYTRSIIKHGICKINYYSFG  
YNAVALKIKDAIMKQKDPIFYHDISAWAIEAFRDVFKETMVQFQSAGKA\*

>SPBDM4\_v1\_40558|ID:27157863| putative Xylulokinase [Uncultured spirochete bdmA 4]

MPEDRELIRLGIDLGTGSLKMKAYCGEHSFSSQKYDILSSRAGIAETAPDAWINALKLA  
WADIRQQLSSAGRPSTITSSIGLSGQM HGFVPISKSGKALHNAILWADVARGAEYAEMYSR  
LLNGAFDRLNAPAAGLTALILLWLKHSKPDLYKRTAFILFPKDYLR YRLTG HIGTDAGD  
ASATLLWDFKAHSWSQEA FNVLGLESSKLPPVLDSFSVGGFVTGEASRETGLPEGVPVAV  
GSADKSCIEYSGFFNDYFEHHTPRLAASGPGSPVGVSVGEPATDADWQQPHIAQV SIG  
TGIQVVIPVRGIPPYSPALNFFETCVAEVGYRMAAMLNGLALEWVLSVFNGNWETIYRD  
LDEGKTQLPQDLIFL PYLTGERSPYQNSKARGAWIGLGLHHSRTDMLAAALLGVACTIRL  
GIETLGI APEAKMYCIGGSTRYPVWMSIVSAMVGRLLVSPEPDASVRGAAAIGFEAAAG  
AGAAHPGDYTHQNMPEPLETSPVESEQPGWMNEYKRFKMYERLFGEEKTH\*

>SPBDM4\_v1\_40559|ID:27157864| putative integron gene cassette protein [Uncultured spirochete bdmA 4]

MIFNIRAIRLEDAAVYHSLVDEIKDEGQYLFSTLRFSLDTEKYYIERHEEMSSPIWGAFD  
EQGTLGWFDFNRGGFSEIAHTAMLMGVKKEFRGQGIGSALMDACIENAESLGIEKLEL  
EVFASNTAARALYIKKGFEEGIRLKKRKFEDRYDDL VCMGLFLG\*

>SPBDM4\_v1\_40560|ID:27157865| NAD-dependent epimerase/dehydratase [Uncultured spirochete bdmA 4]  
MRVLFVGGTGNISSACTDEALRRGYEVFHLNRGTHTEKEKPGVGLLRADIRDAAAASAV  
RGLHFDSVVQFLAFRPEHVEADIKIFDGITDQYVLISTCSAYRKPSLTPVITEETPLENP  
YWEYSRLKIACERVL TGRAGSATCEAGPADDLDCRRPTDRSQEPSFPYTIVRPSHTYDD  
GWIPGCFGSAAGYGLAWRMLQGLEVVVPGDGQSLWTLTHASDFAVGLVGLLGNPAALGEAF  
HITSDEHLTWDAVHMIIAEALGVRPKIVHIPSDFIKVRPERGAGLLGDKAVSVLFDNSK  
IRRFVPGFAPRVSAEGIRSLAWFDAHPERKTPDPAMNADMDAILERWRGLVGRIS\*  
>SPBDM4\_v1\_40561|ID:27157866| protein of unknown function [Uncultured spirochete bdmA 4]  
VFANIITSKKTKQKNWRDALT\*

>SPBDM4\_v1\_40562|ID:27157867| exported protein of unknown function [Uncultured spirochete bdmA 4]  
MKALGRSAGVARKFSFLVFAVLCGAMLSAQPYVDAYSSATEQAMKSMLTGDAFKAAKA  
IEAGSADLANLATSKAPGYTAPKSYLANVMSVNPDGSVGISTISQWQYIASDFGADHAIL  
QLTWGQNAVNLAEVGHRSFLIPGVSVNGKSYRFLIHLKVVNVEEMKYTDEAFNAGLFNA  
YYSGAAGKKTQYTITCEVLAIEDVGNVSVKLGMP\*

>SPBDM4\_v1\_40563|ID:27157868| PAS fold domain protein [Uncultured spirochete bdmA 4]  
MSDTQPENTVTAWQDEFSASITVIDRDFITILFMNEKSATGFAKWGGMTLLGKDVRHCHQE  
RSVRIIEHILETGEPNIIYTIKNGVKKLIYQAPWRENGQIAGVVELSMEIPFEMPHHVRG  
\*

>SPBDM4\_v1\_40564|ID:27157869| TRAP transporter, 4TM/12TM fusion protein [Uncultured spirochete bdmA 4]  
MRKFSGRLKTVIYIYVIAVGGFFHLYTSVFGNFAYLQRALHLSMILPLVFIWWPVSKKAP  
KDKVPFYDWILAALS VLPPTYIAANYWAISTRIVQVDPVTTAQLVLGILLVLLLEATR  
IVGLPLMIASVFLIYMAFASKIPGLFQGISFSVPEIVEEVFLTDEGIFSSPLGVSATYV  
MIFLIFGGFLEKSGVGDFFMKFAQAFTGTQPGPALIAVTSSCMFGSISGSAVANVYGTG  
TFTIPLMKRIGYPDYFAGAVEAVASTGGQIMPPVMGAGAFMASFLGLPYRTVMIAAIVP  
ALMYYGAVFLMVRLSAHKYGLKGLS QEELPSKREVLKQWYMPIPLAGLVYFLLAGFTPMR  
AAVFGIILAWLVSFFRPKSEDSERRKRSVITGTVISLLIAVAFVFPDIMEPISRSGIWL  
GLVSAFVGV SFLNDGMRPKDVLDAIYNGVSGIPLVAIACAAAGIVLGSVALTGIGGKLVG  
FILGFAKDFRFLGLLLVMIMSIFLGMGLPTTGAYILASALGAPILVRMGIAPLA AHMFVF  
YFAVISNITPPVALACFAASSISGANPNKIGFQAVRLGFLAFVVPFAFCYDPGLLLQSTT  
MANILAIVTA VVSVLALGYFWVGYIKHPIPIWMRAILLAAGVLALAPQLLYVGIAAAAVA  
VCYILSATGKVKAPEKHLAL\*

>SPBDM4\_v1\_40565|ID:27157870| TRAP transporter solute receptor, TAXI family [Uncultured spirochete bdmA 4]  
MRKAVVCLLALVLTGVYAQNKAGWPDQLKFMSGPPGGNWFALGTALSEMWSKSVLQTTSS  
SSGGGVSNILNADVKKGDFGFTVASLLGAAIAGEEDFEGKAVKNSVIMANLYTQYTYFIM  
RKDFAEKNDIKSVDDMIEKNIPVRFATLKPGTASEFVIKALFKKGYKTDYDQLKKKKWTF  
EFTSYDGGADLLADNHLDCFAFSVGKIASVVMNIESNTQFVILPVGQKALDALAAAYGTT  
TFTINPGTYKSVTVPIKTIGDYTCIVIRKDLPSLVYELNKALWANRDSLAMAVGDIAEL  
NPKEALPAGLPSHAGSVQFWKSVK\*

>SPBDM4\_v1\_40566|ID:27157871| Transcriptional regulator, IclR family [Uncultured spirochete bdmA 4]  
MAEVNSVRKALAILDLLSDGKERTLSEIARQLSLAKSTAHGLETAAERLLEKDSGSNT  
FSLGIRLIELGYCAQTGLDLVRIAAPFLKGLNIRFDETVHLVLDNDEVLYIDCIESQRR  
LRTYSVIGVRAPLYCTSVGKAILAYLPDTEVRRIVAERGLAPFTDNTITSEERLWQEIAR  
IRQCGFAIDDREHEDHLRCIGAPVRNAHGKVFASVSLSGPAERNTMERIESMAPALLEAT  
GEISHRLGFRNRELGRSRG\*

>SPBDM4\_v1\_40567|ID:27157872| DctP family TRAP transporter solute receptor [Uncultured spirochete bdmA 4]  
MKKAIIVL VLLMLATPALFAQQKPVKLVFTSVSVPGDAHTQAMYVFKDEVEKLSGGQIQ  
VDVYDSGKLF TQQGEQDAIRKGTVDMMVYTS AQWLAEFIPYLSMFGAAYTFQSYDQMTKTF  
NGPIGKKIFEEVAQKTGIRPLVAYYLGTRQLNLTSKAGAVTKPEQMKGVKLRVNSPTWI  
AMGKALGANPTPMAFNEVYMGLKTGSVDGQDNPLPTDKNAKFYEVTKYIVLTNHVVDSTW  
PSINEKKWKS LTSEQQGWIMQAAEKARQFCDKTNLDNEKSILDFRQQGITVIENPDRAA  
FAAYAKNSYLTESKDISKDWDLALYDEIQKIK\*

>SPBDM4\_v1\_40568|ID:27157873| conserved membrane protein of unknown function [Uncultured spirochete bdmA 4]

MPNWLKRTGKFLDCIELYLPMLTFTVLFVFSMSQIVARYFFKPMVWPEELSLICFIWTA  
LLGGLYAKRTGSHVAFTMLYDAAKPGVQRAMRIAGNLLLLVAFVIIFVPSWNYIQFMAYK  
KSDALRIPMNWAFFPFMIFLADMIVRLVVDIVRDIVKAGGTK\*

>SPBDM4\_v1\_40569|ID:27157874| TRAP transporter, DctM subunit [Uncultured spirochete bdmA 4]

MNLPLIVFFVSFVLMFLLRIPIAPGMMMSAFYFFLSKNPASSLDMVAMQFLTNMNASFI  
LIAVPLFVFMMAEIMNSGKVTSMIFSFANALVGKRKALGHVNVIASIIFSGMTGSALADA  
SGLGSMEIKAMREHGYYDDGYTCALTAASATIGPIPPSIPMVFYAMLSSASIGSLFLGGV  
LPGLLVGVALMIYNAVVISQKRNYPEGDKLSLREFWKLTLRSIPALFSVVVLLGGIYTGVV  
TPTEAGALAAFYALIISVFFYRAFGWKDFKQVLINTVRTTGTLSLLVGSAYAFSYIVTIE  
KIPNFAAELMLGITQNKYIMLLINVVFLVLGMFIDTTAITLVFIPIVLPINQLGIDL  
HFGVMIVLNMIGLSTPPYGMLLYVVSIGSGTPLKKIIEIIPMLFVIVAVLLLITYVPD  
IVLFIPRLAGYK\*

>SPBDM4\_v1\_40570|ID:27157875| Dihydrodipicolinate synthase [Uncultured spirochete bdmA 4]

VRYTMKNTIPDGVYPTMITPYQEDGRIDWAALVEWHIERGVAGYFAVCQSSEMFLHS  
LRERLELARMSIKFARGRVPVLVSGHVADTLDDQIEEAKMMADTGADAFILVTNRLARRH  
ESDEVFKRNLELFLSRFDRDILLGFYECAPYKRLLNADLTRFVVGTRFRGFLKDTSCRM  
GDIRAKIEAARGSNFKLFNANAATLLGSLQAGAAGYSGIMTHFHSDLYVWICRHWKDEPE  
LARELQEFGLASVIEYQLYPVNAMYALQLEGLPIKLYSRADARQFTESMRLEVEQMMR  
LSHRFSERYKE\*

>SPBDM4\_v1\_40571|ID:27157876| protein of unknown function [Uncultured spirochete bdmA 4]

MQLPPKNRKASIFSVESQKGNVPMNKQKISIHVARLAGVSKSTVSRVISDKGGSVSHE  
TLEKAQMARFDGVILNSVTDNIDLKLNLGVPVAVLIGERSAAQNIDTVGTDTLQATRIGME  
YL YETGHRKIALATSDHGSEYLSLHARAYRDFLQEKGLPFNPELLFSVNLDAEGGRELA  
KQLLGLQNWAERMDSLFCGNDIVAITAMNELRKYGIIAGIDLSIIGMDDIPASSQTYPL  
TTVRKPRERIAVNPKREGLLWKAKKADLPCMEIAQLMREVRAITGVPAAPRFTDRPVALI  
EWRDGSIIDTVRQLEAE\*

>SPBDM4\_v1\_40572|ID:27157877| conserved protein of unknown function [Uncultured spirochete bdmA 4]

MRTNIVLDDSLVDEAFKYANNIHTKRELIEIALKEFVAVRKVKNLRDLKGGKISFAEGYDY  
KKMRVGE\*

>SPBDM4\_v1\_40573|ID:27157878| conserved protein of unknown function [Uncultured spirochete bdmA 4]

MILVDTSVLIDFLKGNTNHVVQLFDDVLDLDRQIPFGINDYIYQEILQGARDRKEFNKLKEY  
FETIPFYTLKKGRNSFEKAAIINFSCRKNGITIRSTIDVLI AETA IENDLYLLHNDLDFT  
YMAKVIPELKIYTNKNDFL\*

>SPBDM4\_v1\_40574|ID:27157879| putative PilT protein domain protein [Uncultured spirochete bdmA 4]

MTAVLDVSAGIELLLQKDKKDLFTATYEKASWIIAPDLYIAELSNVLMYYAVLARRNDAL  
LMTNDEQLSILCKKLNIEVVI\*

>SPBDM4\_v1\_40575|ID:27157880| conserved protein of unknown function [Uncultured spirochete bdmA 4]

MPLLQVRDCPEDIYKKIVLAAKRKNRTIAQQTVVLEKSLGQEQPNIERRRRLEKIKTR  
QIPEKVKKIDAVALLREDRDR\*

>SPBDM4\_v1\_40576|ID:27157881| protein of unknown function [Uncultured spirochete bdmA 4]

LYAAIKWQAYIQVRITCITLREAIRQTVGWYRSNFSV\*

>SPBDM4\_v1\_40577|ID:27157882| conserved protein of unknown function [Uncultured spirochete bdmA 4]

MQWIKRFYESDPSALFKKGKVVILYGARRVGKTMLMEKLLAGTEGKIFKSGSDDFELVAI  
LASRKTETYRLFFSPYDVIFIDEAQYVPDYGACAKLLIDIFPEKSVILTGSSAFNLSQTA  
SEPLTGRSIQRFLFPVSLMELKLERTDFQIFQDIESYLIFGMYPEVLSLDNAPENTEYLV  
NLRNSYLFKDILALEHIRNSQKLQDIVRLLAFQIGNEVSLNEIAVKTGLSKNTVERYLDL  
LEKAFVIKKIGAFSRNLRNEISKSAKYFWDTGIRNAVINDFRPIELRNDLGALWENFVV  
MELMKKYEQRRYASFYFWRTYDQKELDLVVDENGRLSGYEIKWRDDKAKIPHLWIETYK  
GHTEVITKENLLKIMSEEAKE\*

>SPBDM4\_v1\_40578|ID:27157883| putative transcriptional regulator [Uncultured spirochete bdmA 4]

MELAKLTSKGQITIPVEIRKRLRLEKGDVFFIEENGKIIFQNAQAQTALSTFQNMVGEA  
TKAGFSSEDDVVQYIKNLRAQNGDKK\*

>SPBDM4\_v1\_40579|ID:27157884| conserved protein of unknown function [Uncultured spirochete bdmA 4]  
 VRILVDTNIILSAALFPEGKVS RVFSYLLEAHTVVIASYSIQECKTVFMKKFPDKIDCLK  
 AFLLKIDYEPFKTPKKLDAHDFPPMRDASDLPVLASAILSDVDILLTGDKDFEGIGIKKP  
 LIFTPNQYFDLIQK\*

>SPBDM4\_v1\_40580|ID:27157885| exported protein of unknown function [Uncultured spirochete bdmA 4]  
 MKKVVFVILTLFALAGSVVFAQLPAQSSAMA AVPSSTTGEEFADVEGMSLSADEMVQVKEG  
 DLILSINRNKQTMKVISGSPLAIVNDKAEVYTVPVTTTRVVVNAQARAGQDRDAMEGSSSFV  
 GSGKDAYLPIQLPAGIYSLDYVSKNVGGYGPGIHIDASVLTTMLVGS PRNMNDFVHWTD  
 KDNT\*

>SPBDM4\_v1\_40581|ID:27157886|vnfA| Nitrogen fixation protein VnfA [Uncultured spirochete bdmA 4]  
 MNSAMIPDEKETLRFLLDIARTLDKHVELRSSLGPLLSLLEVRAGLVRGMVTLLERTTGV  
 LKIEEANGLSVEEKERGVYRLGEGEGLIGRVFETGLPIVVPDLSKEPRFLNRIGGRSKEDLT  
 GLAYYCFPIKAGGSVIGTLGAERRLSGELRDAWMEWDQRLLLEQVASIADS AKLRERILE  
 EQFRLRQELLSNESYQMVSPSTRFVHPGSSIIGTSTAMQGVYELIAQVATSNATVLTITGE  
 SGTGKELVAQEIHRLSGRADQPYIKVNCAALPESVIESELFGHEKGAFTDAVAQRKGRFE  
 LAHRGTLFLDEIGELSPQVQVLLRVLQEREIERVGGDRPIKVDVRLIAATNRKLEQEVQ  
 SGSFREDLYYRLNVFPIHIPPLRERKSDIVLLADYFVEKYAEKNGKLIKRI SRPALDLLT  
 SYHWPGNVRELENCIERAVILSTDMVIHSYHLPPSLQSALSTNTEPTTTLD AALSRLKE  
 LIVEVLKITSGNMAAAARRLGITERQMGLRIHHYGIDWRQYRTTKM\*

>SPBDM4\_v1\_40582|ID:27157887| conserved membrane protein of unknown function [Uncultured spirochete bdmA 4]  
 VKRRMILLLLMGFGASLATAFGEETIESLTAATDMIWL VLTGSLVFFMQAGFAMVETGLT  
 RAKNTTNILMKNLMDFCFGSIAFWMIGWGLMYGSDKLG LIGFSDFFKGPMGDPK FYRDWF  
 FQVVFAATSATIVSGAMAERTQFKSYLIYTVFISAIIPVSGHWTWGGGWLSQLGFH DFA  
 GSTVVHSVG GWAAFMGAIALGPRTGKYVKVNGKVT VKAFP GHNIPLAMLG VFILWFGWYG  
 FNPGSTLSGVSTDIARVA VTTTLAASAGAVGALIFSWLWFKKPDASMTMNGALAGLVAIT  
 APCAVVSPGASIVIGIAGVLLVLSVEFIDKVLHIDDPV GAVSVH MVNGVFGTLAVGIWG  
 NMDGVA VGLLHGGGFHQLGVQALGVVTVGGWAAIMSWILFKLIKVTVGLRVS IKEEMMGL  
 DLAEHKSEAYSGFQIFS NM\*

>SPBDM4\_v1\_40583|ID:27157888| Nitrogen regulatory protein P-II 2 [Uncultured spirochete bdmA 4]  
 MKLIIAYIQPHMLNDVKQEL YKAEVYKISVTNAMGCGQQMGYHESYRGVDIEVNLLKKVR  
 IEIGVNDNFVKPTVD AIK GARTGEIGDGKIFIIPLEECIRIRTGETGSVAIG\*

>SPBDM4\_v1\_40584|ID:27157889| protein of unknown function [Uncultured spirochete bdmA 4]  
 VPKVAISSKKNVPGYFTGPIEGTELLIISKMALNGLLVRNRRLATIVSGACSVWGSVLDA  
 TFMWEE\*

>SPBDM4\_v1\_40585|ID:27157890|glnA| Glutamine synthetase [Uncultured spirochete bdmA 4]  
 MHETFDLTENPVSSLYGSNCFSNV MRERLPKNVYKEMLEVQAGEKELTLEVAEVVAASM  
 RAWALEKGATHYTHWFHPLTGLTAEKHDSFIAPTPDGKVLMEFSGKELIKGEPDASSFPS  
 GGLRATFEARGYTAWDVTSPAFLKQDPTGTTLCIPTAFISYYGHALDKKVPLLRSMDALN  
 VQAIRVLR TLGN TTSRRVTTTVGPEQEYFLVDK KYFDERPDLLLTGRTVFGSMPAKGQEM  
 EDHYFGAIKERVAAF MREL NTELWKMGS AKTQHNEVAPNQFELAPIFTTTNVAVDANQL  
 VMETLNK VARRHGMEALLHEKPFAGVNGSGKHNNWSMATDDGINLLDPGENPESNARFLL  
 FTAAIIEAVDRYALLLRTSTATAGNDHRLGANEAPPAIVSVFLGGQLMEIFDHIAEGKAS  
 NGVAGGEKIKLGV TSLPSLPKDVSDRNRTSPFAFTGNKFEFRMVGSSQSIATPNTYLNTA  
 VAQVLSEFADKLEKATDKNAAIQAIVKESYGKHRRVVFNGNYSDEWVREAERRGLPNVR  
 ATVDALPVL IQKDTISLFETHK VLSREEQESRYHIYLER YAKQINIEAGVMIDMARRSIF  
 PAVSSYASSLARDASALAALGAVSVPQEKRAKKIAELASELYDETDKLEKVLGDAQVIED  
 AFTQA KSYREKVVPQMANVRNRGDALEKL VAKDVWPFPSYEELLFKL\*

>SPBDM4\_v1\_40586|ID:27157891| protein of unknown function [Uncultured spirochete bdmA 4]  
 MHTTWKFSWGENPIDNDVTIIDLG VQQPYMVVYSQKFIVTSYTQEGYQFIFEGQWETRDE  
 TSIPGSLVVVYSEDGNSLYFESENPEGFTLLGESYRLYRVPVDAPVVP IGPPEGP\*

>SPBDM4\_v1\_40587|ID:27157892| membrane protein of unknown function [Uncultured spirochete bdmA 4]  
 MDSRYAELNTVQKAILMPNLLW TYTIVVMWCMFIQYYSLTIAFISTVA VSVAVIAWLLAN  
 GMIRKVS RLLVWGIAVSVADILSTLWALLDPVVSANAVETNPLFSASAARHPVGALS VFL



LFKITLTLILFSSYYPLGTPNTMEQRLKEAMRAVDRRIEERMGGLELIIPRCCFALVFRK  
ANVLTVEDMEELDSSIVLLMARRKIEYIAICALVLLASLSNIALILFYHLGYFRCA YWTW  
PVAMGCIGLILLIVNVFDERIIRINTSIFNRRSVLCVWGGGAGNEASKFSLFYFFYDSL  
NCMCRSTSDQSFGRMVYSGR\*

>SPBDM4\_v1\_40588|ID:27157893| protein of unknown function [Uncultured spirochete bdmA 4]  
MCSSTISIEGILGEGDLTAAVLQKKILALHEENTRAILSIDSEGGSIDDVVDIVAFCRYF  
GIPFDCAKGVYSAFLLFCYGERRLATKNAEFWYHRPSHYVHGQEDDWAGIGCDLEFR  
ESAVTHEVVRALARQEESGTENSMLSIPFLMKAGVVTEVV\*

>SPBDM4\_v1\_40589|ID:27157894| protein of unknown function [Uncultured spirochete bdmA 4]  
MNTTVDWKRAIFMYGRVGVDEDDSTTPHVSKEVTEQLAGFASGSDDVTLMLHSLGGTYD  
DVMEILGFEHLVPFKTNVFSFGCCLGEAALLFASTGNRIVSSGTRITTTDVFEDEVGFVN  
ASKIQGYARMFEQRRESLLHFLEQRSQTPREVLREKILNGNRRPILPSEALQLHLVDEVF  
DVLQHN\*

>SPBDM4\_v1\_40590|ID:27157895| protein of unknown function [Uncultured spirochete bdmA 4]  
MKKEVFSAYGKEARMKFLITNKSLPDNPRLQDFDELVPLRHFWRSVTITLFFVVLLIVILL  
KLIVHYTLQVDPEYVLPYSKGS LNIRHAGRNHEVSDNTR\*

>SPBDM4\_v1\_40591|ID:27157896| membrane protein of unknown function [Uncultured spirochete bdmA 4]  
VHFVGLKASAREFWREKILLFIALFIVVATIAFFAFSNTFESRNDFYQAHDLPVQKNQ  
SMFPLDVFKLSVPVLFILDTLIWGWNSFVLLNRYFAIMLVSPLFFFYQFIVKVPAPFN  
LGMELSLFFRTSATALPAHDTLRLVVLVGYSVVEATLDFWKL VCTKEIIVIRKYRKYN  
SKVWVEYLDGSHVKGM YLLYMLLLPCAISESLCVHVLQ\*

>SPBDM4\_v1\_40592|ID:27157897| exported protein of unknown function [Uncultured spirochete bdmA 4]  
MKLQGILSFLFIFSYAAMAGSQPQINPSGVWSMWDWNMNYTKAFSWGPNVNEVVVIDL  
GAEEPYIDVAVGEFKVSSYRQEGYRFIFEGGWGTMSEELIPGNLVAVYSEDGNSLYFESI  
KPEKFGAVMELGETNRYFRVPVDAPVPIGPEGP\*

>SPBDM4\_v1\_40593|ID:27157898| membrane protein of unknown function [Uncultured spirochete bdmA 4]  
MKKEIVSAYGKALLLFLIPWLNFFVPLSIFLPLSSTIERTRPSTTQMNIMGAVLSLIV  
VLCYLLGKYIQEGMRDADESPVERNDSKSVKEIYSSKKGDLLYSLASLALPVLVYCLQ  
NIFGVTEGPPSINLYQLPVVLAIGPVIEEYLFKVLVLYCTKYGIRRFVFLSALFFTLIH  
GYSVSMAAVVIFLGSFILAYFFLATLYSMYRIIYPIQMHCW NFSIFMIGMFHVDTLAP  
VAFFTISLFLVLLYAIYRIMKTKRLMITEGPI\*

>SPBDM4\_v1\_40594|ID:27157899| exported protein of unknown function [Uncultured spirochete bdmA 4]  
MRSIYRETKRHAMSGRLRLCVACLLISVCGAKLSADGVDFSALESIVENGTKYGGIGA  
CLFSDQGT LWRYRSGGGDNRIAFDENTEIHIGELSGQFTVLA VRALCAQ GKIDIDSPVSR  
YLPFLFSGANANVERIGGLKIRSL LAEASGYADRPIPNMDGILDADSLAKRLSGAKNRF  
EGVRRSEALMMDVLGLLVEKASGRSFGDYVRDEVYGPLGMVASSFEKDSTPPEKSRFYH  
AGGEPFLDSSSDMYNYLDPFFSMRSTLSDLAQCYSYLLRTEDEDQTKERAIDSEAPFSP  
AIAGQLNRQGYESGEGWILTEPSLDYLGSAWAEGSYLSHRVVVILARNQNVGIVLAGNI  
YDQWGINALRDIGIKILKRYIEEQFKIPPSFSRPEVREIPADVSPQPLYASSQGVAV  
GVGNLVTLECNRAYSEFAFSTGESFLPTTENEFRELKIIDSASFLIRWNTGTEALMRRP  
SFTHYSFIVPPREGTYRPAEASGGWSDFWVIASHGQYFTISGGDMKEYLLLDSSPTTAG  
ILCDDGSVFFGKQVLIDPSGTVSIGFAKDPD\*

>SPBDM4\_v1\_40595|ID:27157900| membrane protein of unknown function [Uncultured spirochete bdmA 4]  
VHFIGKVKASAREVWREKTL LFIALFIVVATIVFFSFSNTFESQNDFYQAHNLHPPARTE  
SLFLDIKLPIWALVIIDLIIIWVWNTFVFMNRRFFAYILIMPLIFFYQYIVKSPAIPGLG  
MELSLFFKASATVFSAHATLRMVVWVYAVVELTVNLFWILVCTKEVFATVRGYRMLKRE  
RAPKETISEYLREDRLKGMHVCCILLFFCAVLES LCGHVL\*

>SPBDM4\_v1\_40596|ID:27157901| exported protein of unknown function [Uncultured spirochete bdmA 4]  
MKLQGILSFLFIFSCAAMAGSQPRINPSGVWSIQGVDMTKTKMFSWGENPIDNDVVIIDL  
GAKQPYIIVSSVKFSVTSYAQEGYQFIFKGQWETRETSIPGSLVVVYSEDGNSLYFESV  
KPEDFVDIVDLGESYRLYRVPVDAPVMPIGPEGP\*

>SPBDM4\_v1\_40597|ID:27157902| membrane protein of unknown function [Uncultured spirochete bdmA 4]  
MKKEIVSAYGKALLLFLIPWLNFFVPPVFTFPLSLGFGGAQPSRLFLNIYSTAVALIG  
EFCYLLGKAIEQNMVCKEENPAEEDQPKSLKKVYASGPKDIVLYSLASLTLPLLLYSLD

ELGLIAGELPKINPIFSLAALVVAPVIEEYLFRKVLVYMYCKEHGIQRFVLVSALIFSLIH  
GYSISVAGAIMFVVSYIHTYFFLATLYAMYRSIYIPIQMHCWNLTTIVVIGIFHGEKLA  
PTAFFIISLLILLYAIYRIIKTKQLMIAEGPI\*

>SPBDM4\_v1\_40598|ID:27157903| membrane protein of unknown function [Uncultured spirochete bdmA 4]  
VHFVVGKLGASAREFWREKILLFIALFIVVATIAFFAFSNTFESRNDFYQAHDLHPVQKNQ  
SMFPLDVFKLSVPVLFILDTLIIWGWNSIVVLLNRYFAIMLVSPLFFFYQFIVKVPAPFN  
LGMELSLFFRTSATALPAHDTLRLVVLVGYSVVEATLDFWKLCTKEIIVIRKYRKYN  
SKVWVEYLDGSHVKGMYLLYMLLLLPCAISESLCVHVLQ\*

>SPBDM4\_v1\_40599|ID:27157904| exported protein of unknown function [Uncultured spirochete bdmA 4]  
MKRSSFLFFIFFMILCATAFADQPQINPSGVWSIQGVNMTHTWKFSWGENPINNDVTIID  
LGVQQPYMVVYSQKFIVTSYTQKGYRFIFEGQWETGDETSIPGSLVIVYSEDGNSLYFES  
ENPQGFTLLGESYRLYRVPVDAPVVPVIGPEGP\*

>SPBDM4\_v1\_40600|ID:27157905| exported protein of unknown function [Uncultured spirochete bdmA 4]  
MKRFVFLIGIMMTGGMAAAEATGNESATQATVPVGVSTIVMPVSEVSKEVVFVDFVEGVEII  
AQAELDAVEGARQIRNDPNEGYPYTEKEMQKERDLREWKREAEGLVTQADLGERAVANW  
NQACKFLTLVSGPQLDSGRIWSDTKTIEVINYMMGKGWIREFYVNNPNAIVNYAAKECG  
FSTGDVTFKNNGKITPRYLEMVGITALKGDHTNLCNLEGKFIWDPYGGEDRIIRRTNQR  
FIRFE\*

>SPBDM4\_v1\_40601|ID:27157906| protein of unknown function [Uncultured spirochete bdmA 4]  
MRLFLLLLLFSSETVDRESLRFA YSTEQGFDTSCGLTALSCLMDRYWGVPSDEVSLARDFL  
AEKIVGGDLTVSFADMAAILKAKGFSCAYQMNFGQLEKAVARYAPVIVHYDRPEGHFAL  
VLAIRDGSVLTADPAEGTISREQA AFESLWSGNVMLAALPGGAVDLELIEEAKRSVWGRG  
ELLERAALAGAGVTGW\*

>SPBDM4\_v1\_40602|ID:27157907| exported protein of unknown function [Uncultured spirochete bdmA 4]  
MVKAMKNIVRRVLSAMAAVALLSAIGAPAFQAHTAHQRVGVVEAKDSLEATVGTTLLEVFRS  
DTAKTNGVEIDPTISLDLFFRRRFGLSFEVPALVWIATGHEAVPRAVGA VGDPEVTASYT  
FRLSDWRLSAALS YTHPLGIWNY YEARERQIASGSGYPKLGALFSAVRYLDPIVAGTSLR  
GETCFARPERSGTSTRPLILTANLFATEALNDVVALSASLSPKLSWPRYLNGVPDESGII  
YSLTGSASLVFSEKDHTLRVRVSKLLSDYSSPVAFDLGFSTFRKKE\*

>SPBDM4\_v1\_40603|ID:27157908| exported protein of unknown function [Uncultured spirochete bdmA 4]  
MRATACTAFCVA AVVALFSIASCSNDPSSWYPSGKATIVSWYETSVGGSQVCMITLKIG  
NTGQSTISVYTVSLSAKTDVRTYKYKTIAESFVILPGKSVYVNAEIEYDSNTEALAADGLS  
IVDEYYQ\*

>SPBDM4\_v1\_40604|ID:27157909| exported protein of unknown function [Uncultured spirochete bdmA 4]  
MKRFVFLIGIMMTGGMAAGEGSASVSVGNIGIGSSNEPFPDIEGRPLTDKEQQQTDGGF  
FKGLVGGFVSGGLEIADQLIEKGTVSNWKGKVGIEAVIGAISAEIGGTTYKMSEVGVGLYR  
RTEELIPIFRSAAASAFTWGAGRVRIMWGN\*

>SPBDM4\_v1\_40605|ID:27157910| protein of unknown function [Uncultured spirochete bdmA 4]  
MAAAGKQKDRNGENNAKDSGDTIDDMWPDMSLFSFSPRLLYEKGQQHTNKETYNYRLHL  
\*

>SPBDM4\_v1\_40606|ID:27157911| membrane protein of unknown function [Uncultured spirochete bdmA 4]  
MKSIIIGFLVGVLLTFLVEKTSRRKTEEGHVRPHVIYCITGVLGIIFAITIFLLPSSGHN  
TPFYILLIFSALAGALCIYAYFACSIDVSPDSISITSLFRKRAEVTIEDILRLKEVGFFR  
LLIETRNTGNYYFPIDAYNMREFIAMMQKDHPENHVGF\*

>SPBDM4\_v1\_40607|ID:27157912| membrane protein of unknown function [Uncultured spirochete bdmA 4]  
MKFLITNKSLPDNSRLQDFDELVPLRHFWRVSVTITLFFVVMLV VILLKLIMHYTLQVDPEY  
VLPLLQRLVFICVTVILYEVCHMVFLLYRKYRKYLYLVVQPNALLIGVGVDFIGRQEMLMA  
LAAPLIILSFVYAAAMMMLGHFVMNIFIVVCTNLYISTGDIVAFRFAKNCERHDSVHYS  
KGFLHIRHIDYNREVSNNNS\*

>SPBDM4\_v1\_40608|ID:27157913| protein of unknown function [Uncultured spirochete bdmA 4]  
MIGWPLANKTALRYYESIETYENSKAALHEIYTKLYPDIY\*

>SPBDM4\_v1\_40609|ID:27157914| membrane protein of unknown function [Uncultured spirochete bdmA 4]  
MNGLWSYSFVVFQITSVIIFFILFNNTSTVSKLVKNIVLLTSVVFVSLFLVSLYIPNQQR  
DNLKAFLPFIIGAIASIAVLIIETKYRKGKLNFAFAKPSNVSITLYLLTLAFYIGMRI

PAQVSGERIVIKATLLPMLLISSVNEEMYFRYYLDDILASIKATSNKTFRAILISLLFSL  
VHMVSTFSIPYLAGRFAISFILLVVKRSMKNPIYPVFLHFVINMLVIS\*

>SPBDM4\_v1\_40610|ID:27157915| exported protein of unknown function [Uncultured spirochete bdmA 4]  
MRKFLLCLSIFISMVQVPSYTQSTDTVDAFTTEEFVLNDRHFSVNVDHFNTCLLVMLSY  
YPEQFSLDTEVKSLIDGYVRGKDVGHRFVFNNTQKAALGAMLDPYTLESTTVNRVLKFS  
FSKASNVMGLTIDLRQEGFEIPDAYASISLFYDENSDAVHRFERDVISIVKRRISPLVE  
FLDKEKQYNFLPHKPLSLYVTFANNIQSLHGMANDYAQNAVMAVSLASEHDDAVLFFHEL  
AHLWASVNEVKANIISEVEKSDKKEKYEEILKDCAGKIVQDDELLSKGSIQSESIVDIVN  
SIYDASLLGFNEFWAITASKYLFPLYSAPFSESACRFPAGLSGDKITWEHARDLFDWISA  
TNYLDVVRLTADPQKVYREFVLFVLCIGHGLDYALEKSGEFVQ\*

>SPBDM4\_v1\_40611|ID:27157916| exported protein of unknown function [Uncultured spirochete bdmA 4]  
MRSIYHETKRYAMSSRLPVLVACLLISVCGAKLSADGVDFTALESIVENGTKTYGGIGA  
CLFSDQGTWRYRSGGGDNRIAFDENTEIHIGELSGQFTVLAVRALCAQGGKIDIDSPVSR  
YLPFLFSGANANVERIGGLKIRSLAEASGYADRPINMDGILDADSLAKRLSGAKNRF  
EGVRRSESTLMDVLLVEKASGRSFGDYVRDEVYGPLGMVASSFEKDSTPPEKSRFYH  
AGGEPFLDSSSDMYNYLDPFFSMRSTLSDLAQ\*

>SPBDM4\_v1\_40612|ID:27157917| protein of unknown function [Uncultured spirochete bdmA 4]  
LRTEDEDQTKRAIDSEAPFSPAIAQQLNRQGYESGEGWILTEPSLDYLGVAWAEGSY  
LSHRVVVILARNQNVGIVLAGNIYDQWGINALRDIGIKILKRYIEEQFKIPPSFSRPEV  
REIPADVSPQPGLYASSQVAIVGVGNLVTLCNRAYSEFAFSTGESFLPTTENEFREL  
KIIDSASFLIRWNTGTEALMRRPSFTHYSFIVPPREGTYRPDAEASGGWSDFWVIASHSQ  
YFTISGGDMKEYLLLDSSPTTAGILCDDGSVFFGKQVLIDPSGTVSIRSVSSDP\*

>SPBDM4\_v1\_40613|ID:27157918| membrane protein of unknown function [Uncultured spirochete bdmA 4]  
MVCMILAYLLDLILLYAMVNVVPLVLAFIKKKDLATFYHDNINLLLLPGLAFVVCLLGH  
LFTKEAGLSLHVYVWIPWGICLIDVVNAIRYLFRKGEHVPVENAIADRLEKWWRRHSGK  
SGENK\*

>SPBDM4\_v1\_40614|ID:27157919| membrane protein of unknown function [Uncultured spirochete bdmA 4]  
LSIIFALILVLLFILLHVHSLWAKPFVRCSWGIVICLLTLILNHVRDLTGQREFFLSAL  
FLLACLEITIFYRLIRETSIDEKRRGVGNLVLAAIIIFLIMLPLRKSSLPFVNNRPIDI  
VFYSITFFLFAFIEELTFRYLPMNQFITLARFDGIIRTRPNIRDIA TILLSLLFSFVHF  
DITPSVLVGHLLFFGILMCLLYLTTKRLWLLVLVHGIYKIFAM\*

>SPBDM4\_v1\_40615|ID:27157920| ABC transporter, ATP-binding protein [Uncultured spirochete bdmA 4]  
MITVENVYKAYSNVQAVAGLSFEARQGEIFGLIGPNGAGKSTMIRMIMNILAPDSGTIRF  
DGEPLSETDKDRIGYLPEERGLYRKAKLGEVLEYLAAIKGAKPADYRPSIDAWLERFGLS  
EWKLRKVQELSKGMAQKAQFIGAIAHNPSVVLFDPEFSGLDPLAQDELLAVMVELKQKGV  
TVLFTHIMEHAEKICERILLINKGKEVYGTMADIKAQYGRNAVQLEFDGDASFVAGLD  
FVESVVSYPRIEVELKDGADADLLFRAIAGRLKVRRFETVAPSLHKIFIRIVGGEEAQN  
VQA\*

>SPBDM4\_v1\_40616|ID:27157921| conserved membrane protein of unknown function [Uncultured spirochete bdmA 4]  
MSRLKHVIRHEFRLTAANKTFVILTILGPFLIFAITVLPALLAQSPGSVASGKPLALYGA  
PPAVEQALAAAFSGMDIEVERVDDVAAAKASVAEDARIAFLSIEPGWPDGGKAVWYSKSG  
SEVALYSAASAVLEAAARETRIVESGIDPALVAKVLSPPSFEVIKLDKGGAEEARSGSF  
VEALMTVLVFIMLIYMTVLLYGMIGRSVVTEKTSKTVEIMLSSVKSRLDLLFGKILGLGL  
AGLLQYAVWVSMFLLKQFVGPLLRLSVPAGISAGNLAWLVVFFILGFLLYSSAYAALGA  
ASEDEQQLGQMAWPLIMFLIVPLVMISTLVSNPDSTLVVLSLFPMTSPIVMLARVLVSS  
PPVWQLALCLVLLVAAVAGMAILAAKIFRVGILMTGKRPKLKEVLRWVTVK\*

>SPBDM4\_v1\_40617|ID:27157922| ABC transporter related protein [Uncultured spirochete bdmA 4]  
MIHIESMTFGYGKRPLFEGLDLNLEPGTAYGLLGLNGAGKTSLLKLLAGALCPQSGTIRV  
FGEEPWRKKASFLADTIFVPEDPWVPAVKPSAWLDRYAVFRPAFDRERFAALSREFALEE  
DKLLTRYSGQRKKFTLAAALASGARLILLDEPTNGLDIPSKSQFRRALAQSVDPNRIVI  
VSTHQVRDLERVIDPALIVHGGKILFRLGSDLMAERLGAHVSELSPDVVYAEKDRVGY  
ALLELGHGTGADDVQAADLELVFNAAIASPDRLKTALSGAQLPPLDPADA AVREYGEKEE  
AQ\*

>SPBDM4\_v1\_40618|ID:27157923| conserved membrane protein of unknown function [Uncultured spirochete bdmA 4]  
MKMTKETLRKPFSAARVLLAKNRALEDLPAFGIGAGILAGLNLLTIATRRAMMNDNSNG  
QSWAVIISIAGFFLAAAFAFKGMHDGRAGTEWILLPATSLEKYTAALVFYAIYPLVAAAT  
ATALSALLSLVELIAGGGPGGRIWNPLSAGFDGWVNYATGALIFAAGSAAFRKRAFIKTVG  
VSVAYALACMGLLLAGMLLIRR VQGLPLSFTGSFQNE MSFSGNITPGAQRAMDVIEKIVR  
YALIPLFAIFYGYFRVAEKEARDEVQ\*

>SPBDM4\_v1\_40619|ID:27157924| Transcriptional regulator, GntR family [Uncultured spirochete bdmA 4]  
MRFSDQKPIFSQIAELLENDIIAERIPAGARLPSARDLASSLEVNPNNTAARALQSLAELG  
VAQVERGTGYVSEAGAAKVREFRKR SFLDEELPRLFRSMADLGVTLEDIEARWRGFIAS  
ATEKKDGIS\*

>SPBDM4\_v1\_40620|ID:27157925| SpoVT/AbrB domain-containing protein [Uncultured spirochete bdmA 4]  
MLISVIPIGNSRGIRLPKAILDQLHVSDTLELEVEDQQIILKPVTKKPRHNWNEAFIKMH  
QEQQDTMLLPETKVPEAFEWEW\*

>SPBDM4\_v1\_40621|ID:27157926| mRNA interferase [Uncultured spirochete bdmA 4]  
MGMVINQYEVYLVDLDPTQGHEIQKTRPCVVLSPDEMNHNISTIIIVAPMTTKSHYPTRI  
EVNFNKNKGWIVLDQIRTIDKTRLVKKMGKIDRKIIQNVKKVIKEMLVD\*

>SPBDM4\_v1\_40622|ID:27157927| Prevent-host-death family protein [Uncultured spirochete bdmA 4]  
MAGHITANDLKTGIGAIEQMTNDEREVIITVRGKQKYVILPIEEYNQLREFELDAAIQE  
AKRDIAEGRYHTGSIEEHMNRVHHV\*

>SPBDM4\_v1\_40623|ID:27157928| conserved protein of unknown function [Uncultured spirochete bdmA 4]  
MYKLLFTDSYEERAREFLKKHPEIEKQYIKTLQLELNPFHPSLRLLHHFKTSNFEGYSVS  
INLSYPISLEFLISEQEILLVNIGDHQDIYNKK\*

>SPBDM4\_v1\_40624|ID:27157929| Alpha-galacturonidase [Uncultured spirochete bdmA 4]  
MKTDLVIA YIGGSRGWAWTLMSDLAMEGALRGVVRLYDIDRQAAETNARIGNALLSRPD  
VVGKWHYEVADDLKSALRGADFVIASILPGTFAEMASDVHAPEQYGIYQSVGDTTGGGGV  
LRALRTIPMYEVIGKAIRDYCPEAWVINYTNPMALCVRTL YEVFPGVKAIGCCHEVFGTR  
KLLAAMVRERLGAAGAPGARGGSEVPGASGATMKDIEVNVLGVNHFTWIDQASYGTDFDL  
PHYKAFVEEHFESGYEGTEGENWLNSYFASGERVKFDLFRRYGLIAAAGDRHLAEFMPGR  
MYLRDPETVRSWKFTLTPVAWRIENAEKLRKAARFAAGKENFELKHSGEEGVKLIKALC  
GLGSFVTNVNFPNRGQIDSLPEGCVVETNALFSRDSVRPVEAGKLPPSVGELVAPHAIAQ  
ETILRAAMARDAWAAPAFMHDPMTAPPGEAEALYTRMLRATEKYLTDYTL\*

>SPBDM4\_v1\_40625|ID:27157930| Extracellular solute-binding protein family 1 [Uncultured spirochete bdmA 4]  
MKRIGLVLFTLLMSATIVFAQSGSVTLRWAYWGSESRIKRSQQAIDLFMAANPGIAVNPE  
ISGGTGDHFNKVDTQIAGGSGPDIVQMGGNISDYVKRGVLLPLDKYVGSVLNTSVIDPSA  
IESGTIDGHL YGVSTGVTMPALVYNKSLQRV GAPLPKVSMTYPEFRA YLVSIKSRLPAG  
VYPMQDIGALSSNSTPFGYWTRYNGTPLYNAETNMTAVTSAAAQKYLELFDYRDNGLVP  
PADIASGFAETNADTSMIIAGKAAIGFIWNLNGYQAATTDELGLIEFPGAATKALWQ  
APSQFYTVNKYSKNPELAVKFINFLVNSPEAAKVLGNDRGASASSTARAAGSTNVNDQKV  
LEYLNSAGPHSSKETTHLPNDTEFNSTLFLIYQRVAFGQISPATGGQQIYDLITRLIKK\*

>SPBDM4\_v1\_40626|ID:27157931| protein of unknown function [Uncultured spirochete bdmA 4]  
VTLPLCAKTMVALIKRVNNTNPILFIQNLLK\*

>SPBDM4\_v1\_40627|ID:27157932|yesQ| putative ABC transporter permease protein YesQ [Uncultured spirochete bdmA 4]  
MKNRTARRISAFLSNFIIIVLGVGMLYPVVWLIAASFKESNTIFSDPGLIPKSFTLQNYI  
QGWKGIGIIGFGTFFKNSFICTLCVIANVIFCSLTAYAFARLRFAGKNFWFAVMMVTLM  
LPSHVTTIPRYIIFRSFGWIDTFLPLVVPKFFATDAFFIFLLVQFMRS LPKELDESAMID  
GCGKFGIYTRIVMPLTTPALITT VLF TFLWTWDDFFNQLLYLNSPSKYTVPMGLR LRFVDS  
SGMSSWGPMFAMSVLSLVPCFILFFSLQKYFVQGIITGIGK\*

>SPBDM4\_v1\_40628|ID:27157933| protein of unknown function [Uncultured spirochete bdmA 4]  
MGRQHQQGHHHGEPEVLPRETETGKGIGSKGTKDDIGYDTKGANDKGVFKKSTEADNTDP  
FPALDIIIL\*

>SPBDM4\_v1\_40629|ID:27157934|yesP| putative ABC transporter permease protein YesP [Uncultured spirochete bdmA 4]

MNRKARKKAIRENLSSYAFLVPWLLGFFIFTLYPMIYSLYLSFTDFNMLQPPKWIGLRNY  
FVMFVGNQDQFPRDERFLNSLFVTRFRVVISVPLKLVFALAVAMLMNQRLRLIPFYRTL  
IPTLLGGSVAIAVLWRRLFAGDGVNLAILSGVFVNNPPAWISNPKYALYTLILLSVWQF  
GSPMIIFLAGLKQIPQEYEAASVDGAGKTRQFFAITLPSLSPIIFFNLIMQMISAFQSF  
TQAYIVSGGQGGPLDSTMFYSLYLKGFASFSEMGYASAMAWVLLVIAALTAALAFKGS  
SLVSYGSGE\*

>SPBDM4\_v1\_40630|ID:27157935| protein of unknown function [Uncultured spirochete bdmA 4]  
MEGQGALLINRAKYIIDGNRIYFVQPREFHSILPEAVEKPISSYYAVLSGPEYRAA\*

>SPBDM4\_v1\_40631|ID:27157936| conserved protein of unknown function [Uncultured spirochete bdmA 4]  
MRYTDTWTAHPRIEQTRVSTVEILRCPGVMMQADVSMMEKVMKRDTIAIRDPFVLA  
VPEE  
ETYYLYGTTDPDPWKQSGIGFDAYMSADLEDWRGPYPVFRPMTGFWGTHNFWAPEVYR  
YR  
NAFYMFASFKA  
PRHERATQILRADTPLGPFVHSAGPVT  
PSGWECLDGTFFVEDGQPWLI  
FSHEWVQVNDGEMWAVPLSPDLRRT  
EGAPSLFRGSDGPWTKGLVRRDGS  
GLEDARVTDG  
PFVYQAGQGNLFLWSSISPSGYALG  
VARSVSGRIRGPWKQEPEP  
LLEAGRGHGMIFRGF  
DGRAYITYHYPN  
DTPNERFQFREIRLEGARLALKGEER\*

>SPBDM4\_v1\_40632|ID:27157937| conserved protein of unknown function [Uncultured spirochete bdmA 4]  
MSIDRHELVRRHNPVHHA  
FDPFSPSVGNGEFAFTADITGLQ  
SFFPTMEGATPLCAMAQW  
GFH  
SYPETEGVARNPDLLRRSYFNA  
ENGTGGYMTDPAGQEELFRDLR  
INPHRLNLGRIAF  
LFGGKELSAQCVAGIEQVLDLW  
SGELRSTFLYKEQQVEVLT  
LCHPNEDILGIHRSPLLA  
HDSL  
SVQLSFPYGSHEMDASDWQA  
EDRHATRILGQAQR  
TCVSLLRVLDDDRYYVDAATHG  
GERSRIAQTGRHAFEFATSGLS  
LEIVIRFSPYEIKEDLPSFY  
EIQNAAHQFWEAFWSSGG  
AVELA  
ESRDKRAIELERRIVLSRYLTA  
IQCAGSYPPAETGLTCNSWY  
GKHFHLEMHYWHAV  
HFIVWGKPEFFERSFGWYRR  
ILESARQRAAEQGYEGARW  
PKMTDPSGRD  
SPSPIGPLLCW  
QQPHPI  
MYAELLRAH  
PERPILSEYADIVTATADFMAS  
FAQWNETKKRYELGPPLIPV  
QE  
NHRPE  
ETRNPPYELEYWRWGLSTAIR  
WLGM  
LDRPVPQEWIQVAANLAPL  
PLDSRRNIYLA  
HEACPATY  
EEYATDHPAM  
LFLPLGVLPGASVNREYMSQ  
TFDAVLRAWDLQSLWGWDF  
PAMA  
MTAARLGRTRDAVDLLMETPK  
NTYRPN  
GHNPQLPRTDLPVYLPNGS  
LLLAIALMTGGW  
GERTEAAANQAGPPERPAPTAS  
RASGGAPVRACAYAPGFPDD  
GSWTVQVEDICPIP\*

>SPBDM4\_v1\_40633|ID:27157938| exported protein of unknown function [Uncultured spirochete bdmA 4]  
MKRKSILVAVGLVLGALCLASA  
ASTADITGIWLGE  
GGAQLSVRAHGS  
SLHLELNADASRI  
RVEGMEQGS  
DGAWNLR  
LAAGPAAAEWSGTLKLVFPK  
DSMLPGPMNLGISAQLK  
DNSILEL  
SLPDAPFSTRRLHLRRSSGK  
GLQGLWV  
MDEAPLFLRVSDEGR  
TMLFTFTGGNPV  
SLLME  
DAKIVTEL  
RQSGDGTWAGS  
FTRPSGR  
TFALVLTLENEK  
LIFGVSSFPFSR  
KTSFSRASGP  
GQ\*

>SPBDM4\_v1\_40634|ID:27157939| exported protein of unknown function [Uncultured spirochete bdmA 4]  
MIRCSTVSLMVLVLA  
AAAGPLWSQASQTQ  
GQDDEGLFDQGT  
LVTTQPQPTSPA  
EAAGGSA  
PTAPPSDILLTSE  
VVTIGGSFDGKY  
TSTFSWNKFPDS  
FENL  
GSPDSQVFSDEL  
GAQLYFD  
ARPDANFRVY  
GKI  
ELSYPF  
SFVSVEDASTY  
EKNPSIQVEEL  
FADFNWDRK  
LFFRAGKQSI  
KTGVGYFFSPAD  
VLSIQPIDPTD  
PTKEREGPVALQ  
VNYPFGLDNL  
YLYVLDTG  
VTDPAAL  
AISPQAQFIVG  
TTELT  
VGGLYQKDHV  
PRFLLTASYTAS  
DFKFFHESV  
LTVGSDRTF  
VRTS  
AIPGSLETYID  
DNTLYYTGTIG  
FIYSTSSP  
DFTLAVQYLY  
NGDGYEDPS  
VIRDNAPAVFI  
LKESGDL  
SADDLYMRGL  
HYLAATASL  
KKIGGDNSP  
WDTSLFWIG  
DISDGS  
GKILPKLTWN  
ALDFPSYTV  
SLSLGLPIY  
YGGTNSEYAP  
KGDY  
AISLEVHLGK  
GDF\*

>SPBDM4\_v1\_40635|ID:27157940| conserved exported protein of unknown function [Uncultured spirochete bdmA 4]  
MKSRLIFSTLAFCAIA  
FATVSE  
PRAEP  
LEHFN  
SILAEIDKQSD  
FGTKDFAATNS  
VVVYRP  
DKAPETIKAQV  
FRRDYK  
SQFVIV  
VLDPSYK  
RGQGYLQADEN  
VWFYDPE  
SGQFSHTNL  
KDN  
FQSDTKNGDF  
NKSTYA  
VDYDVT  
AETEERL  
GKYDCW  
VLELA  
AKNDA  
VAYPFM  
KIWVTKDS  
HLMLKAEDY  
SLTKRL  
MRTVL  
YPSYTK  
VAEHL  
LPTRVIFID  
NLTQGNRTE  
VTRSDLS  
SSL  
PDSLFTKSYL  
QRVNR\*

>SPBDM4\_v1\_40636|ID:27157941| putative ABC transporter, permease protein [Uncultured spirochete bdmA 4]  
MAASMKIALRNL  
SRQKGR  
TSMMLVA  
AIGFGV  
MVVTL  
LNSFTAG  
IVDNVQ  
GTVSRML  
GGHIY  
ITGQKIAED  
GRIIS  
GIPED  
NELTK  
IIAET  
GIRA  
EDITRR  
SLANATI  
IFGSNS  
VTQRI  
EGV  
NWDEEKTL  
RSSLAV  
MKGDL  
ASIKN  
PSSLIV  
TEQVAD  
QLNAT  
VGDQV  
IVKLQ  
TVSGQ  
QNVG  
DFIIGAVIS  
DPGVEG  
MLSAY  
ADLSY  
LNGLL  
NLDPQ  
AYQQ  
LSIFLR  
NPGT  
MEEDAS  
RIYSS

LAALGPVYPRDSAASGGNNFLGAGGPGVLTFLRGFSVSTLDSDESPWQGVRYRVTTLNDL  
TTQVQDIVSVLNSVSFVVLIVLMIIVMVAITNTFRMIVNERTAIEIGTMRALGMQRTSVRN  
SFLTEASLLAIGSVVAGILAASLVSNIAGLFTFSTDSALYIMTNQGRLLTFTFKQDSIILD  
ALLVMLMAIGAASSPARRAALLTPAEALRETR\*

>SPBDM4\_v1\_40637|ID:27157942| putative ABC-type transport system, involved in lipoprotein release, permease component [Uncultured spirochete bdmA 4]

MLVILNMLARNLREHKTSLIIGSILGLGAAVMVGSSMIDTATAGMRESFVENYTGDLML  
ISAKKNMSIFGTLGFDTGDSLPGISGYQKLETSVKAIPGVRSVTPLLTGRAGATFLEGKN  
VPVQLFGVDPESYAAMFPGNIEMLSGRMLQPGEEGIVLSESVAKGIKSADGTPVQAGDSI  
LLSSNSATGVKVRKMTVRGIFHFIRSNQYLDANLIDADDLRIMLGMTAAEESGANNMG  
NTDGANGTEGAASTISAAGTENGDFEQDLFSGGLVQTGTAVSPDIYNILGSGPREESKP  
DPDGWHMLLVRIDDTADSGNVEQAIRSTLPDLGDKLYIDDWMMMAAGPVGGRMAEAIHIVFM  
IILIVVAVVALVVMNTFVLSIIERIPEFGTMRAIGAQKSLIFRMIFIESTTNCLLFLGLI  
GIIVGSLVILVLGAFGIQAPNEYFQILFGGPSLHPALSVASVGESLAAILIVGFASIYYP  
TSIALKVRPAVAMGGK\*

>SPBDM4\_v1\_40638|ID:27157943| conserved protein of unknown function [Uncultured spirochete bdmA 4]

MALVELQNVVKHYPLGKTEVEALKGISFSLKTGEFLSIAGPSGSGKSTLLNIIGCIDVPT  
SGAVMLNGKVTSDLGDREITRLRHEAIGFIFQSFNLIPLVLSVEENVEFPFLGPTRGEYE  
SKEKRSEWVNYLIEEVGLTAWKKHKPNELSGGQRQRVAIARALVTRPTIVLADEPTANLD  
STTGSNIIELMKRINRELSTTFIFSTHDRKIVNAADRVTITLKDGLIESDEGRKAPPEASP  
CW\*

>SPBDM4\_v1\_40639|ID:27157944|regX| Sensory transduction protein regX3 [Uncultured spirochete bdmA 4]

MDASVLIIEDDQDIADLIAMYLKDEGIRSDIALTAEAGLELSAASAYDLVVLDDLNLPRMD  
GYEFLQTFRRMTDTPVVIVSSRDADEEMILGLGLGADDFVNKPFSPRVLARIRAHLRSS  
HTPAMDQNREVIQFGDISMDL GALIVERRGEPLAMPTKELELLAYFVRNRGVALKTEQIY  
KDVWGNMYGDYTTVAVHVQRLRKRIEPPAQPCFIKTIYGIGYRFEIPTEASACPERGRA  
S\*

>SPBDM4\_v1\_40640|ID:27157945| putative Histidine kinase [Uncultured spirochete bdmA 4]

MKLRSQFILLDIFTGFAAIAATAALVIFASHINLLTGPGREMISVRERLEAAVDHGAERA  
ELESILEESKSLKLLLEDSDFRLLASNFPEAARLASGEPAEIARNFGEFFMNRIGGGTTEE  
YYLVAIQLTPGGFYSSFITSTAPFVVLFLAILLLPFLASFRLNRTLKAIKSLQLATERV  
AAGDLEYSPIMEGPEEIVSLAHSFDAMRLALRDESDRRARFLMSISHDLKTPLASVIRGYV  
EALRDGHAEDSGRQEHYLSIIDQKSMLESRIELVNFASLSTSDWQLTLRPVRLREFFS  
GIAEAFREEASVFRIFAATINIPDDVTAMMDEQLFTRTLENLFSNSLKFTHDGGRIELD  
CYTLEGFTDIAFSDDGPGIADADKPYIFEAFYRGDKTRTTQGMGLGLAIAKSITEAHGFS  
ISVRDTQGPVTVIVIRIPHCQG\*

>SPBDM4\_v1\_40641|ID:27157946| exported protein of unknown function [Uncultured spirochete bdmA 4]

MHDLMAKFFRSPLAIGIVCGNALLAVGAALAGIAPVLVVVPLFVLVTGGELALALLSKPG  
AKAILGEQERERKEHDVDRLEETARLRKRLAMLRVENPEVKA AVERLVLAAGLYLESCAK  
GNERDPLVEEAVQNAVATVDGYLHLS DAGRIRARIDSEHGNTRODLEQKTILSLDTSTRL  
IGEKLALPFGGIEGNHTVLDAMDGRQELEE\*

>SPBDM4\_v1\_40642|ID:27157947| conserved exported protein of unknown function [Uncultured spirochete bdmA 4]

MKRNGFLLVMLVSIKGLWQPLAALAEQAESVEIFLTLHSDGKAVVRHSIVWDVSSGTMGG  
FYFQGEQAPMVWDAERCWADLPNGTRTPLDIKNAGDKWDILLSQKRTSGISTWVLTGYA  
DLAAANMVGLTDKSDGEKLFYFWAPPQWEQPLDHRSVTVVFPLEAKAGESGDSRSERLA  
QLGFATEKHVNDENSIDWYAAEGSDGKSYLALRFHQRNPAAHATQDIQFYMSAENVGLAF  
SPLFDALAGQAGPANPSEALQSGEQPGDVGAEPSDAARSGSALGWQRTPLLALFLCGGIA  
ALGVFLYRKKIAGYPKAVAKAEGIAWAGDSWTPPRLSEGTYAIPGKVAEDLHPVEVALLF  
ELPLPRVAVMIKILEDEGVVRLAQEAPLRLEVLKAESADEYGYTFLGAFDTEGWVLSGR  
MADFFETALKKLQEKTWDCDIEATKAYRKKMEEAEAEAKGGTTPTEATPRYACWPSFI  
YVYSHPYYYGNLGLPKFESGSYASFMASACFSGCFSPKNLAGTAGACYSACHNACHSAC  
HQACHSACHSACHSACHSACVSGGPH\*

>SPBDM4\_v1\_40643|ID:27157948| Radical SAM additional 4Fe4S-binding domain protein [Uncultured spirochete bdmA 4]

LSPRTKRAANAEADATAVARPPGAAGVPASPSVAAPSNLSWIDDFWAQAGEHIFSRED  
DGVLLPNNRVYKVNSTAASLIAHLKRGGSMRALQFPSEDAAHDTALFFGDVAALYRGDM  
PVNGTVSSEPFSPFTRLPLVGEIALTYRCNNACRFCYAGCGGQSGRPASAGSVSNHPER  
STADDRIIDIFADEAKIPFFSFTGGEPTLREDLEALVEYAYRRRLITNLVTNGTLIDET  
RARELKKAGLGSQVSIIEGPNAEIHEFLAGRKGAFSETIAGIAALQKAGIPTQTNTTITR  
GNLHVQIRMPAFLASLGVSRFAMNLFIPTIPGEETDRLFVAYEEIGPYVDAVAKEAKKLG  
MTFYWYSPTPFCNYPNPIARGFGNKSCAAADGLLSVAPDASVLPSSWDEPIGNLLRQNR  
ELWFSETARFYKEKHFAPAPCRACDSFTACQGACPLYWRYTHAEPGARKSKEPL\*

>SPBDM4\_v1\_40644|ID:27157949| membrane protein of unknown function [Uncultured spirochete bdmA 4]

MNTAVIRYRIPGLGTTSRLLIFGAFGLGGILPQIFWRGPGTVIGTLLLLLPLFLLSAKPW  
TNKPKDIGEEDWQPVTDAELDRIADAFKSTRHIHLPLWYRPGFGVPFTILLAILAVAFGS  
ALTLPGLLATDALILLWPALNFLKIRLWVPREFEMVMRALQAARSVSLPPDIVCTPYLRL  
DRDEQGLRIPENARLMLPRQKPEDLVGVQMVAINKGPNGTVPYLYAVALTHGQGATWK  
KACGFRAPGYVIEPGGDASYGTVIRQHTDNGGYQTSPQDCSRLVETAIALLKKSSE\*

>SPBDM4\_v1\_40645|ID:27157950| 2-hydroxyglutaryl-CoA dehydratase D-component [Uncultured spirochete bdmA 4]

MTGYTCKYTPVELLYALGGKAELLNDEAEDFEYAEGLTANLCCHAKALLEHSTAVDELI  
LVNCCDSVRRVYDVLKSKQRHKLFLFDLPHDDEACARQQVKQELLRLSELYCGQHNSF  
DRQLFFEACGASADPVPDKPFLAVMGARVSRALLSMQEKVQYPVIDLTCGGNRRLEPLP  
SHAETLDFVALMDWYAAALLQLVPCMRMTNVGGRRSLWENENLRGIIYNTVKFCDYYGFD  
YATLKKETALPILKIESDFTPQSAGQLSTRLEAFAESLKARYDRLPRIKNRQSRLFAGID  
SGSTTTKMVVDLQTAQVVASSIIRTGAKAQAQAALVEVCRQLGTDQDSFAAIVATGYG  
RNNIVFASDTKTEITCHAKGAYFLNSDIRTIVDIGGQDSKVICLDKNGAVVNFIMNDKCA  
AGTGRFLEVMALTDLELVDMSIAGLIWNHDLTISSMCTVFAESEVISLIADNHSSADII  
HGLNKSVAKTASMSRVGGQAPYMMTGGVARNMGVVRELEKKLGLASLFITEAPDLGAL  
GAALFALE\*

>SPBDM4\_v1\_40646|ID:27157951| conserved protein of unknown function [Uncultured spirochete bdmA 4]

MNRIKKFGDVVSKEVYANPGRARLLTTAYSLNGWKDARFGGSLAGAYAQMNAVVSRY  
ICHAHQHPHNAAMVNVFFPCEILHAMDFTPMFPEALSVYIANTACEQVFADAAENADVPE  
SFCSYHKIMIGLAETGVLPKPLLIANTTLACDANQLSFRRLAQDLQIPHVVVDVPPNIGD  
DAVNYVAEQLRSVTAALDVCCHRKMEDDLRAAIRISDRSIKTYREYLELRANCSMPVTM  
SGELFSLVAVHVFLGTPQGEQFINAIREAAEEAPKNRSKKRILWLHTLPNWQDSMKAIFD  
KSERCEIVGCDMTYDVLCDMNPDKPYESMAQRVVYNINNGGAQRRIEAAIEYAKKLHADG  
VLVFCHWGCKQTQGMSQMAKKALEAEGFPVLVLDGDGCDNRVSDGQMVTRVNAFLEQLE  
GMR\*

>SPBDM4\_v1\_40647|ID:27157952|bar| Phosphinothricin N-acetyltransferase [Uncultured spirochete bdmA 4]

MTSGSIRDVRVEDSARICEIYNYVESTSISFEEEPVPPQEMARRIEAVSRNYPWL VYES  
DGEVLGYAYLSRWKERSAYRYTAETS VYVAKGHTGEGIGTALMQALLERVKKLEVHALIA  
VIALPNEKSVAIHEKFGFKAAHFAEVGFKHNAWINVGYWELVL\*

>SPBDM4\_v1\_40648|ID:27157953| putative Flavodoxin [Uncultured spirochete bdmA 4]

MKILVAYISKTGTTEEIAKRIGEILSAKGAETNIDVEVAPIDAVGSVQGYERLILGSPIN  
GMKVLPQFKEFLSTKVAGSNIPTDIFIISYLFERGRNFWKNAIRKNVESIRTLGASSVE  
IFAGRLSEPLPSFARFIFGTPKDLPLDMRDWGKIEAWAEGIAGGM\*

>SPBDM4\_v1\_40649|ID:27157954| putative Transcriptional regulator, LacI family [Uncultured spirochete bdmA 4]

LSVLTEKMMMEYRTVTKLEDIAKETGFSIKTVSRAIHNHPDIKRETRIIIMEVVRKRGF  
NWAAQSLRNQKTNTVGYIIPNITNGFFGEIGIAVD AFFRAKGYSTLICFTSDSRENEIES  
VRSLLAKNIDGILAPIGNQGEYIDQIPNLDDIPLVLIDNRLSGPARNYVLQDNEGNSRR  
LTAHILGHGHARIGFITGPLESSSRERLSGFRNALKDTGIPFDDSLVRSVDWEIHSGYE  
ATKDLLDQKGS SRPTAVIYGNSQLLLGGYKALREKGLSIPRDIASFEHPDIIDALSPC  
PTTLEKVETRIGQAAAEMLLSIIESKEKTPPREVYIPSQLIIGESCGCPGRS\*

>SPBDM4\_v1\_40650|ID:27157955| exported protein of unknown function [Uncultured spirochete bdmA 4]

MKKIGALMLVFLIASAAGWSQTTTTPAKGGKTLIGVSMELTAYTWFLGVIDGCKQWAA  
EHPEANFTFQFEDSHSDVQTMLNNDNLLAAGAKGILFPADASSAIPTIKQNVAKGIPF  
VIGDYKQQPAKPSDAVWATFVGHDMRALGVAAGKIAVDYKTLNKS NPVCLFVSRPTSGQ

VSKDRFEGFRDVTVLAAFP KAKVIEEGDVGAGSRASSQDLVENVLKREPVIDVVC GHND AE  
VVGAYNA AVSQR TNIKFIGIAGDKDVL SFITRGNPAWIGEV LQNPVVLGYQATDAMNRA  
LKGEKLPETY NLPQPEGITPANIKNYDWQTWSWL\*

>SPBDM4\_v1\_40651|ID:27157956| putative ribose/galactose/methyl galactoside import ATP-binding protein  
[Uncultured spirochete bdmA 4]

MTSRFSADTSVQAAALPLVELKNCTMEFPGVRLDNDVNF TLMPEGCHGLVGENGAGKSTL  
STCITGENRMTRGELFIEGKKVRLSGYSIKESQRLGLQVVHQEFQLMSDMTGLENIFIGH  
YARKAGLIDWKT LNRKARELMDFLQCDVNLNVPVHYLR TAEKQIIQFAKAVQSESKVLIL  
DELTA VLQEKDILNIFRIIGILKAKGMGIYISHRLNEIFECCDSYTVLCDGRHISSGNV  
RDIDQKELIKMIIGREL TQA YPTMNTEFGDVMLEVKGLTAPKAFRDIDFQVRSGEVIGLA  
GLVGAGKTEL VQAIFGTHPVTRGKIFIKGKEVKIKNPEHAIQLGLGYIPDERRTLGLNMK  
FDIKENTVLP SMNRFKFKIFQDHV AEARSA YDINEKLELNYYSLWQSVEKLSGGNQKQKI  
VIAKWM LNRNSEIFLLDEPTRGIDVGAKFEIYKLINELTRQGKSVVMVSPELEELIGLCNR  
IYILYEGSIMDIVEGERKTQEVIISSLLGVNGK\*

>SPBDM4\_v1\_40652|ID:27157957| rbsC| Ribose transport system permease protein RbsC [Uncultured spirochete  
bdmA 4]

MNTFEEKAKRYGGGWRSFIRDWMILFLFVALVVIFSLTLSTFR TTDNIMNLRQASFTAI  
IAMGEFFVILIGQMDMSISSIIGMVSIFAGFVVKMGIPIWIAFLLVMAMA AVIGLFNGV  
LVVY GKMP SFIA TLVTMNIKGLNYLYSRGLPISGLPDGFNFLGSGYV GIVPFPVILMFL  
VAIILFVITGHTSVGRSFYAVGGNLEASKLSGINVVFTSILAFVFSGVLTAVGALGLTAK  
TLAGNVSLGENLLFDVMTIVVLGGTSLTGGRGRIFGVVIGALFLQVISNAMVLMGINTYW  
QWVVKGIILII VVLIDSNTKR DVVTTSRKAKQASAEK\*

>SPBDM4\_v1\_40653|ID:27157958| Creatinase [Uncultured spirochete bdmA 4]

MHGDICIPNHEYKERV GKAALMRREGLDALIVNGNEADYANTRYFSGFWPLFERCGVAI  
SAAGDAALMVGPESRAFGGDRNKLDKLYVLKDYREGADPA YPELKADTFNDVFKGLGITG  
KKLRIGVASYL DTSVIIMEGIKKAPEAEIVRADHLMVELRSIKSRNEIAC LKEGYRLAE  
LASQQVIREIRPGMTELQMVGVAQRVIYENGA EYEGLPMYVFSEASTRHAISSYRRFE  
KGDIVQLNLSAKIDGYSASIGYPVILGKLTGKRRDIVLFGLEAHNWTQGQLRAGVIAADV  
AKDFYKFFVENGYKDNFVY GPMHGTGLIEVEAPWVETVSNYAFKPNMTFQIDTFISTDTF  
GVRWEKGVAIEENGVDVMSPQIGMLYELDF\*

>SPBDM4\_v1\_40654|ID:27157959| protein of unknown function [Uncultured spirochete bdmA 4]

MKPIYVLFVGDVDMETDVGSFTPFYEGAKHGTPLLLDMLADKGV RGTFFFTGDCARENPEVA  
KLVAKSGNEVGCHSLYHETVGD ELPFPGVKPLL PHEVKPRLKLC KEWVEKAAGVKTTSF  
RCPRLWGSTAVVNALEELGFTCDVSYPMYFYREQFAPYHPDRKDWTKKGDSSVLEVPNFA  
DMTMKSDDPGLERDRDQWPLFR TVGA EYIFGKSVSFLFCGKKEIPPVLA FYIHPWFWP  
MEASYHFGEATVIPDEFITKNC GPVALRELGKLVDDL AGIGARFVTAREL TEIFA\*

>SPBDM4\_v1\_40655|ID:27157960| protein of unknown function [Uncultured spirochete bdmA 4]

MIHIFPEPKIVRELEGR TKPFDELAIDFGGLPEAEKADLLDIARMRFRNRKEVRITSSVT  
EGDCIRVTPVRDL SGIEAENRDLFLKQGYCLKIEKDQILLKYQE KSGFIYAITTLKQLLI  
RENGQSVLPCCEITDWPSVEHRAVAPTFSWYAGYGR LGFDMQLWGHDEWLEYLNVCIDNK  
INQMNMVMYGYWPFELEEYPETVFRDVPVKIWNKENRRWLT VRYSHPNIEENFLADFIAM  
AHRDFKIFAYVGLNSYNGAYS IKHPEKRMVKPVGSQFMNDFDSLCLSDEGNIGYILASM  
RKIARLGFDFGFTLEESEEGFWFCTCEK CQKRWGATSASPVEAKHKANMWLLNLIYEEIRK  
VNPRAVIGIRAFRQPPELKDPAFLEACVRSMPADIKLFWAPALYVP PTEFKKWIAAFGRD  
RIWGRDTEANAITSTMGR LFRVFESNMIRYADEPNAQVIERDIEQHMTSAAEGVSGINGF  
MFEWYGLFMFQWAHGNYGWGSRMDKKEFFRLSCEAAFGEELGDRVLFALRSILTHESQM  
PFYTTFPFPQKNRITKADIPEIMRAKL RHPGLLEEIHAIQREIEKDPRLAEYIPHFARIE  
NAERRNAVYDMALASLKYEDAASPEEKERLLDEILRYNEQDFDLVKDMFFDINPVSESG  
VKSCMYPYHEIKRLIHNIRHPEAPDDAIVCSGIEALGWLWL\*

>SPBDM4\_v1\_40656|ID:27157961| conserved protein of unknown function [Uncultured spirochete bdmA 4]

MFSEQEQLILESPSFSASAFR YRSGVEALRIRAGRGEFIWLPYLGQQVWDWSVDGKSLKF  
EGFVEEPSYGNFLQNYGGFLIHCGMTAMGNPGRDTHLHHGELPVARFDEAWIETGTED  
GREEGLSLCGHIHWKVPFVAEYHCTPSLRISADGLRLRAEVCL ENPTS RDLEYMYLAHIN  
FAFVGAEKILSTVPF DAAHVTVREEILPGLALPGQAANPALIQRIDGDAA YEP ELVAILN



HGDAAMPAGSVLVNKDGSVRWVRQDSELDHWHVITHNRDRGACGFHLPATAGPTGFAS  
EKALGNLKRPLPAGGSVTLRYECGFGDRLGDAPAGAH\*

>SPBDM4\_v1\_40657|ID:27157962| conserved protein of unknown function [Uncultured spirochete bdmA 4]  
MTEQQRDMGRNQWVYPDLELPPPGRDFPLKGHESLIILNMNAADASVALTLYFTDREPVVL  
APLKIPARRVRCLRMDKVDDIGIQIPRETQYALRLNSDLPVVAQYGRDLTRQQNMAFYTV  
MGYSG\*

>SPBDM4\_v1\_40658|ID:27157963| conserved protein of unknown function [Uncultured spirochete bdmA 4]  
MIGALRLGIVTIGQSPRSDVLPDFIDALGFLPAFEQLGLLDGLSCEGIASLAPRGPDDQT  
LVTRLRDGTEVKLSEKSVVERLPLAVEEMERRSVDFIVLFCFTEFPPVESRVPVLYPSAI  
VSAVVSAVFSSKKNNGGARLCVIAPASEQIPMLARKWGTAGVTLLFESLSPYTSGDSELLD  
CAGRVARLQCDMVVLDLCIGYTEKVRAAFAQATGRPVILPRSLARVAEELAAG\*

>SPBDM4\_v1\_40659|ID:27157964| conserved protein of unknown function [Uncultured spirochete bdmA 4]  
MLKQVIEAYELDDARVNGSRVADFLREKLENNVVHEIKGEKGTDFIKAVIPGVSGKC  
SGGGSATLGIIGRLGGIGARPERIGLVSDADGAIAALACASKLAEMMQKGDRLAGDVIVA  
THVCPDAPTQPHAPVPMFGSPVDMKAMNAYEVDPMDDAILSVDTTKGNRIVNHRGFAVSP  
TVKEGWILRVSEDLVLDIVWSTGDSPPVLPITMQDITPYGNSLFHINSILQPCTATKAPV  
IGVAITAVSPVPGCGTGASREMDIEATARFCLEVAKSFTAGTCKFYSEQEFGRLLKQLYGL  
MTHLQTEGRTL\*

>SPBDM4\_v1\_40660|ID:27157965|arlR| Response regulator ArlR [Uncultured spirochete bdmA 4]  
MNILVVEDEHSLARMIEVELLLQNMNVEVCYDGKSAALASAIKFKFDLVILDWILPDIEGI  
EVCRLRSKGLQTPIMITARQEVSFVRGLTEGADDFIVKPFDIEQLVARIHAVMRRAS  
AQKALPKTVINSLVIDPATKAVYDNGQRVHITKKEFEILMLLLANRGKVVTKEEIIYSV  
WGKDVHIEGAIAVHIKAIRDKLGKLIENVRGFGYMIENSEQEIPQENS\*

>SPBDM4\_v1\_40661|ID:27157966| exported protein of unknown function [Uncultured spirochete bdmA 4]  
MKKRFLAILAVVICFMGIVTFILSYFTAKGSIEQLVLERANTRLSIMVQGFSNIANDIDI  
YSYINFPHEISISIRKGSLSVFQYGTSRDENSPRVKKIETQKGDYDFILYVDLDAEVSGY  
IKPFRQIIAITSILYAVIFAVAGIIFINTVVGPISSLAASMAKITSQNLRRERIPVPRKKD  
EISQLVETFNSMLDEIEGAYNRLKTFVDDMTHDIVTPVQILEGYRQLIERHGKNEKIIDE  
YLDVSKIQLFRLKEMTTSLKAAFLVEKRRRVEFADASEITSRNVAYYRKLYSIHFDFAFI  
EKEVMFPIESMDLERIENILIDNAVKYGDEGGRIEIRLKKNELVVRDFGRGITDPTFAFE  
KNRRDENEDEKKGEGAGIGLSIIKRFSEEYGFITLDLESHAGDGCQFIKFKPERKQ\*

>SPBDM4\_v1\_40662|ID:27157967| exported protein of unknown function [Uncultured spirochete bdmA 4]  
MFLKKFGIAAVILFVSIASLMAETTLVVGQATDPIILDPPMYSPTPHNVNLLIYDRLYD  
LSSDGKVIPGLAVDLPKIEENGTKYTIKIKSGVKFHNGQPLTIDDVIYSFQRGAFNDKSQ  
MKSIFAMMYDLKKIDNYTFQFRTGFFDKSKAPANVQDSDLKSFEDRAKYYKPAAFGSQNLN  
QLTWLGAIVSKATLEKAQQDGTLDYGVTVAVGSGPFFKFDKQGDSTLVRNKDYHDS  
AIQTNVEKIIFKTIRDPSALKTAFLNKEVDLIMNVAPLDAREIEMAGGKILLTNGYFGYH  
YLGFMKSPRVGQVNADGSPDMDGEYDLSAPSAKLRLAILYSINPSDIVNSPDIMDKRGK  
VTLQYVESLPGHIDDPKGTRIEENLKTGYYNPAKAKEIFASLPDSLKKPGSLKCTALS  
GSVYVKEALVIKQVQKRVLGVDLINEQVALSELATRRSKSDPDVWDLINWTQTDSSYY  
IFVAFDGFNTSLLHDTKFKYTKNAQEWIEKGNLSPNGPERNIA YQNAQKEILTALPRVPLV  
AIMGISASQQNISGVFLSPSGSFMLENVVKK\*

>SPBDM4\_v1\_40663|ID:27157968|dppB| Dipeptide transport system permease protein DppB [Uncultured spirochete bdmA 4]

MTRYIFRLLMIIPVLIGVTFIVFSLTYISPGDPARMILPQDATDADIVHMRHLMGLDEP  
FFMQYIHFLFGFKSPSEDSSFSYKGLLALDLGRSYVSNRPVFKTILRFPNTALLTFLAL  
ILSVILSIPAGIISATHQYSLSDMIVSILSLLGLSMPAFWLGMIWIFSVQLKILPSLA  
NPNNLKSLVLPVITLATMNTAVQARMTRSSMLEVIRQDYIRTARAKGLEEKVIRKHALS  
NALIPIVTVIGLQVGQLLVGAVLTETVFSYPGIGTIMVDIAIQRKDTQPILASVVFVAIVF  
ALVNLIVDIVYAFIDPRIKAQYEGMSKARSNRASLKGK\*

>SPBDM4\_v1\_40664|ID:27157969|dppC| dipeptide transporter ; membrane component of ABC superfamily [Uncultured spirochete bdmA 4]

MDQQMRIANVPTSKIKENQKRKSAFQEFWRRFKKNKLA VAGLIVVLLYILMAIFADVVS  
YNFITQNQISNAFAKPLTKAEIDYQDKTTEHLYILGADNFRDILGRIIHGARVSMAGIF

TTIAFACLIGSALGAIAGYYGGKIESLIMRGTDILLAIIPNILFALAIVAALGPSFQNL  
AIGITSIPAFVRLMRASVLTIKNQEFIEAARALGAGDFRIIFKHIMPNCMAPIIVQATLG  
IGQSILSATSLSFLGLGIQPPSPEWGNMLSDARSYISYAPHTLLFPGLAIMTVILAYNLI  
GDGLRDALDPKLR\*

>SPBDM4\_v1\_40665|ID:27157970|oppD| oligopeptide transporter subunit ; ATP-binding component of ABC superfamily [Uncultured spirochete bdmA 4]

MDELLLSIRDLTQYITDENIIHAVNGINLELKTGGSVGLVGESGAGKTTTAYSIMGLLP  
KLTGKIVEGNIFQGKDLTIPEDEMRKIRGNQISMIFQDPMTSLNPILTAGDQIAEVL  
IHGTADKEEALAKAGDMLEMVGIPIRERMHEYPHQFSGGMKQRVIIAIALACDPKLLIADE  
PTTALDVTIQAQVLRMIKELKTKLNTGLILISHNLGVVAQICENVAIMYAGKIIIEYGPLR  
QVFENPLHPYTEGLLSIPRIELDKTRLSPIRGTMPPDPSIVPQGCIFRPRCPYAEDICAT  
KAPHITEKSNRKVMCLMHGIIANKMRTEHA\*

>SPBDM4\_v1\_40666|ID:27157971|oppF| oligopeptide transporter subunit ; ATP-binding component of ABC superfamily [Uncultured spirochete bdmA 4]

MHERSGAEPILQVRNLKKYFYTPRGNLHAVDDVSFEIQEGGTLGVVGESGCGKTTTGRAI  
LRLIEPTSGSILFNGTDIVSLDKHRLRMMREKMQIIFQDPYSSLDPRMTVSGIIAEPLII  
HRRVSGKKELVKHVQKLMEMVELEDRLYSAYPHELDGGRRQRIGIARALALEPKFIVCDE  
PVSSLDVSVQAQILNMQDIQDQLGLTYMFVTHDMAVVKHISDEIAVMYLGQIIEKSPAK  
ELFKHQYHPYSRALISAIPKIDSKSSDTSTILRGEIGSPIEPKPGCRFAPRCEYCIDKCL  
SENPLFKAVSPGRYAACWRAEEI\*

>SPBDM4\_v1\_40667|ID:27157972| conserved protein of unknown function [Uncultured spirochete bdmA 4]

MDLSAAKSSLWDIIDKRKNEIVGLCSDLIRIPSENPPGNVDEIVSFISQFLAKNGIESRI  
TGPAPEYPNIIAGIGKGPVLLFNHGHCDVVPARDRARWNFDPPGGEITSTTIRGRGTSDMK  
CGLGAALFAMSLFAQGKIPLGGRLEIHIVPDEETGGANGTKWLVENGYADNAFACIVAEP  
TSSDTCEVGQKQIRIHVTAQGKAAHGSIGNYVGENAIMKVATLLSRIEELRSMKGVYSE  
SQTQVLFDSKIAQEKLKLERPHVEDVIDHVTVNPGIIGGKIKINMVPDLCEADIDVRIPIG  
LPAKKVIAQFEEIIQQLNLNNIQYRVEYSEANFTEVSEPLVHTIVNNAEAIWHHKVIPAY  
QWASSDARYYRNKGIPTLQYGPANTEGIHSYNEDVDIEDVINATKIYSATICDLLVRR\*

>SPBDM4\_v1\_40668|ID:27157973| conserved protein of unknown function [Uncultured spirochete bdmA 4]

MHRVLVGTSGWNYEDWKGSPYEDLPKTKWLEYEARNFQTIENVNATFYHEMKESTYKKWS  
EATPDGFCWAVKAHRFITHIKRLRDVEEPLKRFFGSVSALGDKLGPVLFQLPPSLAFDGA  
VLEEFSAATHNAARSSAGLPKIMRFAIEPRHASWMRDDALACLRKLGLGFCISDTGGHYP  
CRKAVTSDFA YIRLHGPTTLYASSYSDAQLEDWAARVATLDRDVYIYFDNSCMAYAPNNA  
LDLKKLMDNFVPGSGS\*

>SPBDM4\_v1\_40669|ID:27157974|chpA| toxin of the ChpA-ChpR toxin-antitoxin system, endoribonuclease [Uncultured spirochete bdmA 4]

MVGKKGYPVPERGDIVWLD FNPQTGHKQRGRRPALTSFRAYNEKIGLGLFCPIASKVKGY  
PFEVEIVSGVIQGA VLSDQIKSLDWVERNIEFIEKIDSAKLQEVIEKIEVIK\*

>SPBDM4\_v1\_40670|ID:27157975| Transcriptional regulator/antitoxin, MazE [Uncultured spirochete bdmA 4]

MKAIVQKWGNSLGIRIPAVYAKELDLKNGVFDVIVKDGKIVILPPKPTLEGLLSEVTKD  
NMQDYIDSGSSVGKEAW\*

>SPBDM4\_v1\_40671|ID:27157976| Type III restriction protein res subunit [Uncultured spirochete bdmA 4]

MPLNPTFPTSPYVILDPECRWAPSGKDLSESGYEKLLPPLVYKIRREVKA WRD TDYEGAS  
PTSKALLNWWFDAGHSLEKSDGELGFRYYFAQREAVETVIYLYEVAQVKDKYDLIRYDS  
SGAVSSGMFEEDWLR FVIKMATGSGKTKVISLILAWCYFHKLYEPDSGLATNFLIAPNI  
IVLDRLRADFEGLRIFWRDPVLPDNGYEGQNWKDDFQLTLHVQDQLSGIRKTGNIFLTNI  
QRVYTGNDTEPCFDDDNLEDYFLGKRPVGGKTTDSKIDLG VIVRELDL VVFNDEAHHIHN  
ADLAWFKSIKDIHNRKQKDHFLSLQVDLTATPKHDNGSIFVQTVCDYPLVEAITQNVVK  
HPVLPDAESRKKLQERQSSRYTEKYADYIALGVEEWRKVYAEHEKLGKKAILFVMTDDTR  
NCDDVGQYLEATYEFKDAVLVIHTKNNGDISESDTGKSKAELEQLRKDANAIDSWESPY  
KAIVSVLVLKEGWDVRNVTTIVGLRAYVAKSNILPEQTLGRGLRRMYLGEDTTEFVSVVG  
TPAFMDFVESIQSEGVQLDYRPMGTGTDPKAPIIIIEVDQKNRKKDLKLDIEIPVLGPRI  
YREYKNLDALDPSTFGNKKLAYRHFTDEQNRKIVFRDITNGAIDHTTMLDSATVSDYRSV  
VG YFAQVIMKELRLVSGYDVLVYGKIKEFIASSLYTTPVRLDDLNTLRNLAELESTKTIIE

TFVVRGINHLTVQDRGGVEIRDITRLKDRPFVVKESFYLPQKSIFNKIIGDSRLELSFA  
SFLDNCPDVVAYAKNYFAVHFNLDYVAANGGISNYYPDFLVKLDDNRVVIVETKGLLEDVD  
VPHKMARLAQWCNDLNTAQKKTHFDYVVFVDEEDFKTYTPDSFERLLRNFTKYK\*

>SPBDM4\_v1\_40672|ID:27157977| conserved protein of unknown function [Uncultured spirochete bdmA 4]  
MIERKKICITVKTYPTLSAKY GELVCTAGLLEDGSMRIYPLPFRMLEYDKRYKKYQWIE  
ADVERNADARVESHKIFNIDTLKTLDTIGTEHEWSSRNALVFKSQKVFTNLAELIAVSR  
AIDISLAIFKPSRVLDFIWEEVEREWPKEKLEALKAKASQLSLFQSPEEIAHELQIVRKL  
PYKFSYVFEDDSGKRSTLMTEDWEVGMLYWKCLKAAHGETQALEKVRQKCFARFVRDRD  
LYFFMGTTKEYHG WALNPFIIVGLYPPRKTQPEFVDFRGTDYAP\*

>SPBDM4\_v1\_40673|ID:27157978| conserved protein of unknown function [Uncultured spirochete bdmA 4]  
MISNSSQPPTFKRQKFLAFIKSAGGTLSYMDFQKLLFLYLQRTNDS CYEFVPLYGCYS  
FQAARDIDTLGAMGWLDKKDESIRLLDSRVSSGSDFFLESFHDEYRNIRGNALVRQVYR  
EFPYFAINSKIAGELMDGDELAIIKQKKTDLKNEAVIFTIGYEGLSLEKYLNILIQNDV  
RVLCDVRNPNISRKFGFSKDMLSHAVTKIGIDYVHYPELGIASGKRKHL SAEADYASLFE  
EYARQLPAKKS FVDVLF SIYMDKKRIALTCFEHDPACHRHVLS DYLATKYHVKVAHL\*

>SPBDM4\_v1\_40674|ID:27157979| Nucleotidyltransferase [Uncultured spirochete bdmA 4]  
MSERQVGRVVSVDNFRVFIRLDDDLTSSYKSGFKGLYEVARINSYLIPVGADRIVALIT  
RVKMQEEAEFDTDKHSITLPSSARYVTATMLGTIEHGDKSDRFIQGVYNFPVLGNPVWYV  
TEEDLNRIFDYKPDDTDINYQEDFYLPIGKSPAFPDYDVKVC PDQLFVKHAA ILGNTGSG  
KSCTLASILHSLFDYQYPPDKGKKEKRYLRNAHFII FDTNGEYKSAFIDKEERSGKDEL F  
HRINALHIDEKGLKVPYWF MNWDDFDYLFDPGPGTQAPILKRAIGLGKNNIQSSQAGIID  
QVQESTLNEIINVTCGDEGWKFEAKRNKNKSYDANNEIIQLSTLLANYDNQILKDI AKYL  
SILGKEKLSLEEKSSSIRMIKSLYSGYRETIASQNI VNDKNIDLPTWFEYQKLITQFIDA  
AIDEHEGSNSKLSEYVSTLRLRLEGFLSDSRIAEP LLLNSKEEFDNSLSSFLSFIIGDIY  
RYFVGKDQETDAFDPFMSYSSSKCKKETDITKVSQ L TILDLSLISYDVLENIVGLLGR L  
IIEFVSHFKPDDR GKYP IVLILEEAQNYIPEK NRKEKESIAKR VFERIAREGRKYGISLI  
VSSQRPELSKTVLSQCNSFIVHRLQNPDDQKYVRGLVSSANS DILDQLPLLPQQHAIIM  
GDCVRTAVQVKINTVSPKPN SNNPHFVEKWL NENNDFPDYKKVCDDWQKGIKEGDNKDDK  
\*

>SPBDM4\_v1\_40675|ID:27157980| conserved protein of unknown function [Uncultured spirochete bdmA 4]  
MREIKCFIGGKEKNDNGNSDGMGEKTERV KLLIKKYLELNNVS VLTGAGTSFHLGAPVIQ  
TIPQKIHEALMATEKV KDEYKKQLDELGG EFTTTPLETFINYLQASRFIFGIRGEDTSNI  
DGLISAAQEKLFLC NTEQIPLNQEYESDDHLKENKYFYHEKFVKKILQRPVNLRRINLF  
TTNYDLAFEYAFDNTGVQYINGFSGFSRRSFHPET YDYDIYYPGQTTS GTVHRAERVIRY  
YKLHGSLSWIAKEPGPGNY YGIEEIPV GREKPPHELIYPCVTKKTFTLDLPYSELFR LF  
SSAIKQDQSVLFLCLGYSFNDEHINDI IYQSLSIPSFTLFIIDYRG TENPEIRRLRDLDDP  
RIIIIEGEGAKFTNFVSDILPDLCEEDDDIKIAETMNMLS QKGCSEKEDIDV\*

>SPBDM4\_v1\_40676|ID:27157981| Adenine specific DNA methylase Mod [Uncultured spirochete bdmA 4]  
MKLTDAEQREVVKLVEAGKPLPKYRFLFDDKREVELVWNGKTDEVCNIVLPFQVIEQI  
DEPRKEKPEDSSLQGELDFRGRQKSGWTKLIWGDNKLILSSLKNGPMREEIEKNGGIK  
LIYIDPPFDVGADFSMNIEIGDETFTKEPNVLEELAYRDTWGKGADSFAMIYERLILMR  
DLLADDGSIYVHCDYRVNSYIRLCLDEIFGSDNLLNQISWKRTPFAGSSKARSQKY PINH  
DTIFLYTKSSKYLFEQQYIPFSEYISR FKNPDND SHGPWQSVSLKTY SQETFNKLKEEN  
KLIPPQREGAGWRYK WYLN ETKGKQVEDI WTDINL TNPMAKERVDYPTQKPEALLERIIA  
ASSNEGDIVADFFVGS GTTLVAEKLGRK WIGSDLGKFAIHTTRKRLIGVQREM KASGKD  
FRAFEVLNLGKYERAHYIGVNMNLREEERQKQLEQKEKDFIALILKAYKAEPVENFKCFQ  
GKKAGRLVAIGPINLPVTR L FVEEII ECREKRVSRVDILAFEFEMGLFPNIQEEAKNKG  
IDLALKYIPREVF DKRAVERDQVVFNDVNYIEVTPHVKSADRRKKDSRGAISIALTDFSA  
FYSQDSVLNASASLGNGKNKIVVENGKIIK VSKDKDGVVSKEPLTKK WTDWIDYWSVDFN  
FENKREIVRVKNQATGVEEIIW TGDFIFENEWQSFRTKKDRGLELETPYHECPAGRYKVA  
VKVVDIFGNDTMRIVEVGV\*

>SPBDM4\_v1\_40677|ID:27157982| putative transcriptional regulator [Uncultured spirochete bdmA 4]  
MFDTKHEELIEKIGLGEDSTIEFKSVRFRGNR VALIRDDIADEIAAFANSFDGVI VMGVDD  
ETRTIEGIPLEK LDSV VDFITETSND SIKPAVPIRVFRMMLPNAQ GIDVPVIKLDIPKSI

FVHESPGGYFYRQGDKKRKLSPALARLFQQRSQVRLIRFDEQAVPQTDISDLDEGLWRR  
FAGDTGDAPKVVLDKLKLITKDDTGTLLRVLVAGALMATPHPEIFIPNAIIEAVKYRGTGR  
DANYQEDTRIVTGPLDAQVREALSFVKNMKIMAVKNPGREETPQYSIRAVFEALVNAVA  
HRDYSIAGSKIRLFMFDDRLELYSPGTVPNSTIESMPLRQSTRNETISSLLNRCVDA  
AQPEVQRQFMMDKRGEVPIILQESTTSLGKPKVYKLIDDTELLTIYAADLNEGSE\*  
>SPBDM4\_v1\_40678|ID:27157983| PHP family phosphoesterase fused to chromosome segregation ATPase  
[Uncultured spirochete bdmA 4]

MSGQDWTFKGAHWWEFDFHCHSPASLYPDYGRGDASLKSLLPPREWLLACMKKQIDCIAVT  
DHNSGEWIDMLKAEYQSMKTESLPEFREL YLFPGVEISVQGGIHLALFDPKTRDDIFA  
LLSKSELGFTKSQLGSPDFVTKGSFLDIVACIENEGGVAIPAHVDRPSGLCNELTDGPTL  
RTILGNTHIYAAEVVDSSYSFPGLCRDCKPSWTRVVGSDAHTPDEIGRRFTWIKMGVPSI  
EGLKLALLDNDLSVKRCDMPEGSDPNAHADFVIRSIIEISKSRYCGNGQPEILQFNPWLN  
CLIGGRGSGKSTIVEFLRLAFRRDKEIKELFSKSDFGENEQSELVKNLDDFYREPKGRMD  
KGVLEPATKITVDCRLHGEEFRLIWQQMPDGSISPIQKWDGAHYAKSSGEDIAGRFPVRI  
YSQKQMYEMAQNPKALLRIIDEDPQVDYREWKNRHDQIAAQFRSLRAKERELMVQIAEEE  
NIKGNLEDIRSKLALFERGENAALLKEYQIRRSQIKEVEAYQASLQENYQALANIELGTI  
TPDFSLFGDSAEDDEEIKLIVRYTETLTSLNTRL SAIRDECRKAASQFSKDIETSLWKKK  
TQKILQEYQALIEELRKNVENPDAYGLYVQKKQNLRLAVKGLKQIEELEQQAQEQ  
LTRLDAYRKELSQSRRSFLVKVLEGNKVVVMCLRERGDADSLEEDFRRIIGKEDETFKSD  
ILVTEEGNESGILSALYKNYSDENLLKVKKTIRDLRKDGHTSFGGKFINYVKDKVTPEM  
MDELDLWIPEDSV DVEYCRDQEKKEWTPISQGSAGQKTA AVLAFVLSHGSSPIILDQPED  
DLDNHLINDLVVEQIREKKPQRQIII VTHNPVIVNGDAELVHVMNFAGGQIRVKISGSL  
QEKEIRREICQVMEGGAKAFEQRYRRIYIEGEHV\*

>SPBDM4\_v1\_40679|ID:27157984| conserved protein of unknown function [Uncultured spirochete bdmA 4]  
MAQILNFPGDRPGMNNEEKAQDMVYDALES DSPVQRKRLARKAIELDPFCADAYCVLAAE  
YESIEKRRECFTKGIAAFKEKYGKKYFKENTGYFWGLIETRPYMRLCAGY GELLWETGEK  
EAAIAQYEELLRLNPNDNQGLRYNLLNWLLAMGNLEKAGELLKKHDEGS AFMLFSKLLLI  
IKTEPSNTKKIADAYRKANRQNPVVEYLLDKKGLPDYEPEYYGFGDENEALTYCFDAKK  
IWEEDDTAMAILGELV\*

>SPBDM4\_v1\_40680|ID:27157985| conserved protein of unknown function [Uncultured spirochete bdmA 4]  
MSDDINERFARFLRAVQLQDIRPMSLQSEVKGSMPPQGSLEQLLEWRQSFANGDPV SAPD  
LRIFRPKYEFTVKFQDAVIFVQISIFVISFKIIDPAA YGELWADEELRKIFMEKQIQKTI  
WPLFRQHIHDGMSRLGMSPVTLPWIL\*

>SPBDM4\_v1\_40681|ID:27157986| putative zinc finger/helix-turn-helix protein, YgiT family [Uncultured spirochete bdmA 4]

MSMQLSCPRCGKTRDVETVEREEKVTIRGREVPFTARFSRCMTCGEEFEAPGQLDANLDA  
AREAYTRL YEAPKPEELVALRTRYGASQKAFSII LGFGELTMNSYENGATPDSTNRLLLK  
LAAKPYIFKEMYTINKDRIGAIQRQRIEASKGFQSAMRWDGLEALSASLTALQCEKIEVC  
AEKSGLSVPEQIARYVGCASFQDYTRL YAEARWTS GTTRQISATSM LANSVSGAA\*

>SPBDM4\_v1\_40682|ID:27157987| conserved protein of unknown function [Uncultured spirochete bdmA 4]  
MDRLLATPLFLRRLKPLLVAEKLEFKPRNWRKTMEFMLEEG LSEEDVYDIVAKLKPEHYH  
QGPEPDDNGSAGEVMVFFYPYRRQAPPKDTILLYIKLKIWTDIGGDAGV VMSFHDEGNI\*

>SPBDM4\_v1\_40683|ID:27157988| putative Cobalt transport protein [Uncultured spirochete bdmA 4]  
MRVNTMKNKRLRDFSP LGK FILMLAVIACTYL TDRLIL IAGLIVLQGIVAWTSGAGRVY  
RTLLALAVGAILTLFQIFSISEGATVFTLIPPLGFGRVTDKGLQMSLLMSLRMVSSVG  
VISLVVALTPSTQIVSLVSGTFRLSPAYTCVLITALRFIPTFGERMGKVLEAEACRGYRA  
DTANPFRKIGMILRLSPLLVT CVRDVDSLALSLEARGFSPDSRTRPVTIKPAFELAVL  
GCALVAMGVVVM LGRI\*

>SPBDM4\_v1\_40684|ID:27157989| Cobalt abc transporter, ATP-binding component [Uncultured spirochete bdmA 4]  
MIHIEGLIARAGAFEILKGIDLDIGAGEFVALLGPNAGKTTLIKHFNGLRVPSAGSVMV  
DGMDTRRVKTSRLARSVGF LFQNPDHQIISNRIDDEIAFGLKQTGIPEPERGERVREAAA  
ILGLELLNADPFTLPRALRQRVALASVLALRPKVLVLDEPTSSQDERGATMVMEIAREL  
NAGGTTVIFVSHDMELVARYARRALVLVDGRILADRSVHALFRDTQPLNAAGLSMPGAYR  
LAAALGIEPEEGRQFVPTS VVEAVERRLSEARPCA\*

>SPBDM4\_v1\_40685|ID:27157990| putative Phosphonate-transporting ATPase [Uncultured spirochete bdmA 4]  
VNALFSEKQGRVADENAAPSASSFSPRAAPAAPIVRLEHFSFTYEGAARPALADLDLEVR  
PGEFVGVVGAEGSGRTTLFRVLNGSAPRHFRGTWSGIAEVGGLDACEVGHAEELGVFVASI  
FDDPDAQIVSLTVEEEVCFALVQRGLPSDIVAARMKEALAAVGLSGLERRATSSLSGGQK  
QRLVTASALALEPKLVLLDESTASLDPRGARGLYSLLRAKCQKKGLAVVAVERDLELLME  
YADRVMAMESGRVVM DAGRRDIAPNSRLLKRIGVRLPAWIETVDALGASGLLSAPLPATE  
AEAAARIVELLVESKARTTRPHAIPPTISPAPTGGSLTGNMEENLAESLAERELPA\*

>SPBDM4\_v1\_40686|ID:27157991| conserved membrane protein of unknown function [Uncultured spirochete bdmA 4]

MATTKKGMTTRDLVLIGILLAAGTVIKAVFPKLPVTPNFIISMYCLAVLLVRPNLAETIG  
IGVVSAILAQLTTGAAVPPINFASEPIAIVVCYFLCKISFPKGTASNIVRPAVVSFITTF  
VSGTIFVLILSFVLLARGSSAKYVMIYSVVLPTAVANMVITTLTCYAPLRKVLNIKDEEPA  
KVVA\*

>SPBDM4\_v1\_40687|ID:27157992| membrane protein of unknown function [Uncultured spirochete bdmA 4]

MFMEAKKKSHPKASVVVAKKTVRHAPASRPPLKSARGIVALLFTAAGAFALLSMLLWTHF  
PSIWKPLVVPVPGQVLLSVFSWAAYYLPWLWVAGVLAFLVFPKFCPRSTYLLGISALPFVVVT  
GFARLSSNPGAFFESHPSMAKVGLSSLYAALGFLLAASFVVVIAGYIKLSEWLKANGYIK  
TRAEKKKNGTAQSFGQKLTTFRLNVSMKREERRKRKEEARLARAEALAEKNISLNIPDVP  
PPGPKSEEKTA AVAVADAQAMPEPALGTAGISFTS VPPARPALPGEEPKRAIVERILER  
KAAKTYHVPIDGLLNTYPDGGYWIIDDKTRASAGVLKETLAEFGIEAEVTGIRKGPVITM  
FEILPAHGKISKITNLGDNIALRLAASSVRIVAPIPGKHAVGIEV PNERRSIVSLRELI  
ESELFRQTKMEIPVALGKDITGEVQLVDLTQMPHLLIAGATGSGKSVCVNSIILSILYKR  
TPEEVKLMMLIDPKIVELKLYNDIPHLMTPVVTEAKKAFQALQYCICEMERRY SMLDSLGV  
RDIRSYNRRVRERNLAQEKLPIYVVIIDFADLMQITGKELEATLARLAAMSRAVGIHLV  
LATQRPSIDVITGLIKANIPSRIA FMVASKFDSRTIIDMVGAEKLLGRGDMFLFSGAQDPF  
PVRMQQGAFVSEEVERVVAHVKT LGEPEYIDEEIFIDEEDSDEPTLFEDEDGSDPLFQKAL  
EIVLQQGKASVSYIQRRLKIGFNRAARLVEMMEEKGIVGPAQGSKPRDVL RNPVDFDGGE  
ATRMREDKE\*

>SPBDM4\_v1\_40688|ID:27157993|slyD| FKBP-type peptidyl-prolyl cis-trans isomerase SlyD [Uncultured spirochete bdmA 4]

MEIKKDRVVTIDYSLRDDTGRLIDSSAEAEPLVYLHGNENIIPGLEKELEGKNPGESIAC  
SIAPEDAYGDRDEALVFKVQKKDFGENVEVAPGMQFEAHGENGVQIVTVVKIEGEDVTLD  
ANHPLAGETLHFDVKVVDVREATSEELEHGHVHGDHGDGECDDDCDCGEDDCDCDEGCC  
N\*

>SPBDM4\_v1\_40689|ID:27157994| conserved exported protein of unknown function [Uncultured spirochete bdmA 4]

MKFSSKVHVRFLDIVIFGLAAALVVGTSLLVLNRQSGTRYVQMTGETGEWIAPLDKDAEY  
EIPGPLGITVVHIHDGKAAIEESPCKNKLCILAGAISEPNQWVACLPNKVFVRITSSSSK  
DDGGVDAGAY\*

>SPBDM4\_v1\_40690|ID:27157995| putative heptaprenyl diphosphate synthase component I [Uncultured spirochete bdmA 4]

MQVPTSPSCGNVRSRFRANRTDVTALLAAFCCFLSAIEYMLPKPLPFMRLGIANLPILLAI  
DLLPFKWFLVLA AAKVVGMSIVSGTLFSYVALFSLAGTMIAALVMRGVRRAGKGAISLIG  
VSIAGAVTSNATQMLIARFVIFGEVAWLIAPLFLTGLITGTLMGFFAEYFVAHSNWYSC  
AMGESDVLIAEGGTGADTADTGPSATMATNPAGRGSVQEPQDAKKVHRSRTEKNAGR FAR  
RQRYESLMEPWVAAILGVAIAVVFLQQLLQELLVKTLYLLL FILWTWLAGKRFSLVSTLVVM  
AGIVAANLLIPSGRVLFKLGPLVVFTEFALTEGLAKALTFEGLMYLSKAAIMQGLHFPGRF  
GTIIAQAFQYYDRIIEYRGKVHAKTAVRDIDVLLQEVWLYAWLAPGVDKADAGGAPASAT  
APRATTAESRSRILRSLLFAAVIAAVAALLPFALALIAK\*

>SPBDM4\_v1\_40691|ID:27157996| putative Diguanylate cyclase (GGDEF) domain protein [Uncultured spirochete bdmA 4]

MKLNFN AISVIWMVSAVVVLFNAWISWSRSGTRGSKTFALFNIAIAWYSFFAA FELMSTG  
IDQVLFTHLEYIGLAAMPALMLSFAFEFLDVEFPHRRPLVVTVGIIGFIVMLFQWTTLR  
HGLVYISPHVEAYGDLQVIHFGKGPVYILWTVILGMSVASAATL FIRA VGKADGLLRKQL  
LLASVGFCFPLVVFVLYVTSVFSVPYDVNPF SFVVVSVMTTVALFGTGMFNFAPVARERV

FMSMGESCIADENGCIIVDMNPRAKEILPILNAAVIGKSASDVLSMFPSLAWAIVRQEEK  
VVEFDASSLGGPERVMAKISLIKDGSKQNSGYLIVFEDTSERHQMIAELERYATMDDLGTG  
LNNRRHFFKAIRPEVEKSIRNGMAVGLVMIDVDDFKNVNDVHGHALGDEVLRSCARTMAA  
TIETQDIICRFGGDEFLVFMPPADIEKAQKAGERLRLAIASIQPPRCLEKQIHISLGISA  
APIASFDEIEGLISKADSALYRAKRNGGNQISL\*

>SPBDM4\_v1\_40692|ID:27157997|leuS| Leucine--tRNA ligase [Uncultured spirochete bdmA 4]  
MAKYPRDIEKKWQQRWEDEQTFRVEDERFPKEKRRYVLDMPYPSGAGLHVGHPEGYT  
ATDIYCRYLRMNGYNVLPMPGFDAFGLPAENYAIQTGTHPAVTTYANINRFRTQIKSLGF  
SYDWSREVTTCDEPEYKWTQWIFLQLFKKGLAYEAEMPINWCPSCKTGLANEEVRDGHCD  
RCGTKVVRKRIRQWVLKITAYAERLLADLDTLDWPEPIKLMQRNWIGKSEGATVRFTIAQ  
SVASASADCAKSSAEGDQLEIYTRPDTLFGATYMLAPEHPFVPQITTAGQRAAVEAYI  
EEAAAKSDLERTDLAKDKTGVTGAYAINPVNGARIPIWISDYVLISYGTGAIMAVPAHD  
SRDWDFAKKFNLPPIQVAVGPDETGPFDEPEACTDEEGVAVNSGEFDGLPTAEFKARIS  
DWLEERGLGKKA VNYKLRDWLFSRQRYWGEPIPVVHCEKCGIVPLPEESLPLTLPEVKS  
YAPTGTGESPLAAIPEWVNTTCPKCGGPAKRETNTMPQWAGSCWYYLRYLDPKNPKAFADR  
SKIDYWMPVDLYVGGAEHAVLHLLYSRFWHKVLVDLGLVNTDEPFVRLVNQGMILGEDNQ  
KMSKSRGNVINPDDIVESYGADAMRVYEMFMGPLEVSKPWSTAGLVGVSRLERIWALSE  
RPIVEEPPSPELEKLLHKTVKKVTNDTATLNFNTAISQMMICSNELAKLESLPRAAWEPF  
VLLVAPYAPHLGEELWVKLGHEGSVSKAPWPAYREELTHDEEKEIVVQVNGKVRSKFIAP  
AGTSKEDLIEMAWRAEKIAEWLAGKEIVKVIAVQDKLVSFVLK\*

>SPBDM4\_v1\_40693|ID:27157998| conserved protein of unknown function [Uncultured spirochete bdmA 4]  
MQNPADFKLEAANGGAPGHDLRDPGTHGLSGTGRTAPQRKNRYTFIRVLIALAMLALGLG  
ATELLARDEEHAAAGVMQKAAQRMARAEHAVA EKRRSLGITIDPALDPYRTGLIGVETNM  
LTTTFGDIVAKRTTNTAFAALVVRYFYELGLKPGDRIAVGSSGSFPGILLAVLSACAET  
GVEPVVITSIGASEYGANIEGLSNAEMMAACREAGVLPYMPAAISPGADGDQGISSLYRL  
EPSDDIARYARSAASALKVPFVGGDGFDAFSSHLDVYEKAGPIKAFVNIGGADVNFVGS  
D PASLRLKPLILPSARKSGVEPDGSGGARGANSSEIQPPGGLGYLARGTPVLHFLNI  
KGLALQGGIPVDGDPEAPISEILHRRKKPAWTLVLGLLLAGAALAIRKPLG\*

>SPBDM4\_v1\_40694|ID:27157999| CapC protein [Uncultured spirochete bdmA 4]  
MAGTSIVVSIVLGLFLGELTGWLTGGLVAPGYLALYVDQPLRIVMTYAAAALAFFAVNLL  
SRVTILFGRWRFMFILAGICMGALLDAVVGWLPPTGSDLRAIGYVVPGLIANDTWKQGP  
WKTLLASLVITLATAVLLLFMH\*

>SPBDM4\_v1\_40695|ID:27158000| putative Capsule biosynthesis protein CapB [Uncultured spirochete bdmA 4]  
VIFVVAISAALAAAIVEYRIHITRIRAIPVRILVNGTRGKSTVSRLVAAGLTAGGLRT  
YAKTTGSAARLILPDLREVSIRRRGSAHRRASIMEHRWFVREAHKNGAQUALVAECMAIQP  
ETIRTLETRLAHTIGVITNVRLDHMDTMGTELTSVAEALAESVPERGRLFVGLEGMDEA  
VKEVFARKAARRGAELRFVNCEEETQSLCGQFSYPMFAQNLALALAVCETCGVSREVALR  
GMLGAAPDPGVRSSLELVWRGIAVRVNAFAANDAQSTLAMWRAACGDSSQPDSRADGGA  
GGGQSFRALVFNHREDRAWRALQLGEIAAGMSADAILVYGMGQRLARRTVRGGYRRNGLQ  
NGSQAGAVPPFVVRSMRDADVGAVLETIRSIEGFSTAGESARIEILCAGNIKGQGLALTD  
SFAATLPQETEKAFQGRA\*

>SPBDM4\_v1\_40696|ID:27158001|gpmA| phosphoglyceromutase 1 [Uncultured spirochete bdmA 4]  
MYTLVLVRHGESEWNKENRFTGWTDVDLTAKGVEEAISSGVALKKGGAFFDVA YTSVLKR  
AIRTLNFVLDELDMQWIPVHKDWRLNERHYGALQGLNKAETARKFGEEQVRIWRRSFDIR  
PPELTLDDPRFPKDRRYAGLASSELPLAESLKDTIARFMPLWHNVIAPDVQDGKRVIIA  
AHGNSLRALVKYLDSDMDEAIVDLNIPTGIPLVYELDEELQPVRHYLADENAVKAAAEA  
VANQGKAK\*

>SPBDM4\_v1\_40697|ID:27158002| protein of unknown function [Uncultured spirochete bdmA 4]  
MQEGDVKSEAQIGPRRAGLCIHNLQPDVLSGILAEPTLDLKKSPHFHIFKKVN\*

>SPBDM4\_v1\_40698|ID:27158003| CoA-disulfide reductase [Uncultured spirochete bdmA 4]  
MARYIIVGGVAGGASTAARLRLDEHAEIILFERGPHISYANCGLPYAYAGEKIKERERLF  
VMTPEKFKAWLNVDRVRTEVIAIDREAKKIQAARELDGREYSLTYDALVLSPGAPEIKP  
PIPIEDPRIFTLRSVSDIEHIKEYLETKRPERTIVVGGGFIGLEMAENLHARGSFVTIV  
EALDQVMNPIDFEMAALVHQHLKQKNVELYLSSAVSKFEQAGSRVVAILADGTRLADAMI

MLSIGVRPETGIAKAAGLDTSPNGAILVNENLQTS DPSIYALGDAIAFPHILGMAMPVP  
LAGPANKQARIVADNIVKEPGTRKWHGAIGTSIAKVF DITAAAAGVAEKLLKKNIP CIS  
VITHGSSHAGYYPGAQPLSIKTIFTL DGTLLGAQVVG YDGV DKRIDL IADYIRRKAKVTE  
LGEIEHAYAPPFSSAKDPVNIAGMVAENVLAGLSHQLQWHEVKA FQERGGFVLDVRTPEE  
FSLGVIPGAVDIPLDVLRQRLGEIPRDREVLVYCGVGLRGYLAERILRQNGWTAIYNLSG  
GYKTWEIATEPQSHKGIYKQGLAGLQSSQAKGAQELLHTTFAEGSGMPESLAAKRQTIVQ  
VDACGLQCPGIMRLKTEIDKLPEGGRVVISATDPGFVRDAGAWCKVTGNLLISMEESNG  
KYTAMIEKTVKQSALAAAQAAAAAGGAPFIQMT PKGATIIVFSNDFDRALASFVLANGAA  
SAGKDVMTMFFTFWGLSVIRKPDAPRVAKDFMGKMF GMMMLPKHAGGLSLSHMNFGGIGPKM  
MKS RMKAKRVDALET MMAQARQAGVHLIACQMSMDIMGVKREELLDGVEIGGVATYMEAA  
SEAGVNLF I\*

>SPBDM4\_v1\_40699|ID:27158004| conserved protein of unknown function [Uncultured spirochete bdmA 4]  
MNGTANAKGAPNTKTRRLLIRGALLVVYVLMVLM IYSGRRHTILIDNKDAADGSYSAIN  
GMEV SIDKQESSEYYPGDRDKAMVQGGQKHTIRVNIFDDNK TIEKSFTVPLWSDVM IILVP  
KMVAGIEPWIA PFTMAEQIQEAQESAPPAGETTFQSLGSM IPEGTEEAQQSP\*

>SPBDM4\_v1\_40700|ID:27158005| ABC-type transporter, integral membrane subunit [Uncultured spirochete bdmA 4]  
MSAQKKLSTFFSRYAVVII FVIIITLIAIPPSGLSIKYILQEIIITRLGRNSFLVLALLLPI  
YAGMGLNFGMTLGAMAGQVGLIFAVNYGISNWQGLV FALLVGLPISVLLGYVCGLVMNRA  
KGREMTGYILAFFINGIYQFFVMYMLGSVIPMG NKSIVLSR GYGIRNTLNLESVRQSLD  
NIVMLRVGGFSIPLVSFIVIALLCVFVWFKKTKL GQDMRAV GQDMAVAEAAGIPVEKTR  
IVAIISTVLACAGQIIFLQNMGNLATYNAHDQTGFFA VAAILVGGASVTHASIANVFLG  
VTLHAMFVVSPLAGQKLF GSAMIGEYFRQFIGYGVIAISLVLYAWRTRKAAAEARLSLR  
GAQNGPGKNGGTA VGNNGQA\*

>SPBDM4\_v1\_40701|ID:27158006| ABC-type transporter, integral membrane subunit [Uncultured spirochete bdmA 4]  
MRNFKTFIQDFGWPRIIFFFLVALFIMAPFVGVRLDASFS DVLNRF GQNAIMVLAMVPM  
IQSGCGLNFG LALGLVAGLLGATLSLQLELHGMLGFLG AIVLATPFSIIFGW FYAKLLNK  
VKGEEMTIAMYVGFSFIMFMCIMWLILPYSNPTM VWGYAGKGLRTTISVENYWLKILN NF  
LAIKIGQFFVFP TGLLLFVALFAFLMWLFLRTKTGTAMTAVGSNPDFARASGVDVDKMRT  
ISVIISTFLGAVGIIVYEQSFQFIQLYTAPSPMVFP AVAAILIGGASINKASMVNVLVGT  
ILFQGLLTMTPSVINSLLQTD MSEVIRIIVSNGMILYALTRKIKVSK\*

>SPBDM4\_v1\_40702|ID:27158007| Monosaccharide-transporting ATPase (modular protein) [Uncultured spirochete bdmA 4]

MKKLVAVVLVLAFLVVGADVFAQSKAKFHIGVVTGT VVSQSDDDL RGAEQLIKEYGIVKDG  
GMIQHITYPDDFMSQQETFISNVVALADDDKDMKAI VINQSIPGTAEAFKRVR AKRPDILL  
LAGEPHEDPLVIQGAADLALSADFVSRGYTIIWAAKQLGAKNFVHISFPRHMSYESLGRR  
RAIMEQACNDLGLNFYFD TAPDPTSDVGVAGAQQFILEKVPQWVQKYGN DTAFFCTNDAH  
TEPLLNHLLAYGGIFVEADLPSPLMGYPGALGLDLSNEAGDFPAILKKVEAAVVA KGGAG  
RFGTWAYSYGYTLTAGLGEFAKRVEGNAKKDSMKD VFDALGKYTPGAKWNGAYYVDMGT  
GVRANKNQLIYMDTYVFGNGFLPTTQQNV PENYYTIKMHN YFFFFS FFFFFFFV FFFFFFFFL  
LCCFFLSFFLFFLVFGFFFRKLIYNGIIMANGSSLLSIEHVS NDFYGNVVLHDVSFDLLE  
GEILGLVGENGAGKTTLMHILFGMPVIMETGGFQGSIKIGGTEVHFSSPFDALDAGFGMV  
HQEFLIPGFTTTENIVLNRESMRASILNDVFGDRMSVLQRDRMRERAHKAIGKLGVDLN  
PDMLVSEMPVGHKQFTEIAREIDREQTRILILDEPTAVL TESEA EVLLKTLKRLASEGIA  
IIFISHRLQEVLAIANRIVVLRDGHAVKDTPNENISMRDIASW MVGRSLGESGQRSEARG  
FAESLFKVRHLWVDM PGETVRDVSFDVHRGEIFGIGGLAGQGKLGIPNGIMGLFPAGGEV  
VLDGKTVPLNDPAKALAMGMAFVSED RRGVGLLLDESLEWNI AFTA IQVHGQYLK KIFGL  
FSQRDEKAMEDLCAEYVKLLDIKCTSTKQKAKELSGGNQ QKVCLAKAFAIKPQLMFVSEP  
TRGIDVGAKKLVLDTLHHYNRDFGTTIVMVSSELEELRSICDRIAIVDEGRIAGILPPTA  
DISEFGLLMSG AAMEEA VNA\*

>SPBDM4\_v1\_40703|ID:27158008| membrane protein of unknown function [Uncultured spirochete bdmA 4]  
MQFSRKR FANELYYYSNQMV LFLVM IISLTS GSWKKALV TSLIVLTFMLIQ TGLLSLQGH  
IPILRLLYSLITPAAYSILRATLS DIAFTETVNILLWGSS IYIAVFQTLTLVFRKPFWKR  
FSEIALSLGSALIFILFYAYLDRISVTASF AKGEIDAETMAQALRIQSFLAVFEK FIRA  
PQHLFALFGVISDFLLLVARMRAITLEHRLTRIIEMPQEAKRIIDASRQES ENKDSEES

PGERQPEPADTEPPESLPVRSPTAFFVTVVSSDIIGFTDLSEQLGRTEATALLNRYYGIIW  
TRCAGSFGGRIASLSADTVVTIFGLVDADRSADRALNAAAFLEEMEGLKEDMVVKSLLPN  
DIKVSLSGIHSGFVTAALLGPPGQQKMGFYGDTIAIAARLDSLCREFHQSLLVSHATYRRL  
ALESQVTLERFSEALLRKSTRPMPLYAKKP\*

>SPBDM4\_v1\_40704|ID:27158009| protein of unknown function [Uncultured spirochete bdmA 4]  
MQSQFQKQQTFEIGSTGVKLPKSSNTNQKTAAFVKSILWVAISATAFIVSTSCSGNLDAT  
LKT DGSVRAAVRIDIPEALSGRVVRQFVGIGSREPLFSTDAVKNQFLGRTSINLVDVSSPT  
PDILTSVWVQNLDTLIADTSLVPPGMILYQKIPAQGSAPAMRELSVNLSRENAPYMIKL  
FPGVDKRIIESLSPPALEPDPVTADEYRLNLEQVIIGKKNMPAFDACSVDIAITVPKAIS  
SASGGNFSGPVFRAKLPLFNLLTLEKPIAFSMRWPE\*

>SPBDM4\_v1\_40705|ID:27158010| protein of unknown function [Uncultured spirochete bdmA 4]  
MAMIFTDFHNSCLSPCASLESSPSVMAARAAQKDIDFFALTDHNSALNSLAFALACGR  
AHRRACARARLIPLFGLEINPFEEAHLAIFPDPLSALAFSDRVFRYLPRLEVDPGQFGD  
QVVVDPEERILAMPSAWYGNSLQESFTFFAKEAADAGALVIPAHVDRPQFSVYSQLGFLP  
DGAYDAVEAMGADPDERLCGQHCVISGSDAHVPEHIGRRPSTLEIENERLVDDVSSGLAA  
MLQAWEGARPGIEECVAPQTA AETGEKVCGAGLSSEIPGLAPLLAFLEEWYPCRESQALF  
EEIRSLRVGNAWSVYRRPRQPGAVLH\*

>SPBDM4\_v1\_40706|ID:27158011| conserved protein of unknown function [Uncultured spirochete bdmA 4]  
MTRNIPELIHAEILQGDFEDVELTGVYTSDLLSDVLANGRDASVLITIQAHKNTVAVAT  
VVDISLIILCNNRPVIDDMIDAAAQARIGVIRTSLSQFEVSGRLWQAMQTLPAERL\*

>SPBDM4\_v1\_40707|ID:27158012| ABC transporter, ATP-binding protein [Uncultured spirochete bdmA 4]  
MIELHNISKTYAKSGTKAVDTLTLQIPDGIYGFGLPNGAGKTTTIRILTGAIAADTGSV  
LIDGIDLKDNPIEAKQRFGLVPDTPDLFSRLRAYEYLN FVADVVRVPA AARTSVIEHLAA  
RFELSDVLKSPISSMRGMRMKNLIASLVHAPHNWILDEPIVGLDPHSAFALKELMREH  
AAAGGTVFFSTHVMEVAERICDELAIINRGKLIFTGNLEALRELRESRGAKSGTGEAGTP  
VAAEASAAADDESLEALFLALVEDSEGPKL\*

>SPBDM4\_v1\_40708|ID:27158013| putative Membrane protein [Uncultured spirochete bdmA 4]  
MSRRPASPFMALLTLNLKSLFAIHLPEKKALASPKVLLKTFGWIVLAVFLVADFGFMFAM  
MDIGMYNALAPLGMQSFMLLYDTVMSSVIVFLFAFITSLSFFSSAQYEALFTMPLK PSS  
LLTARMATVYAIEAPIAFLVMGIAAGVYGIKSHPGDFLYMLFNALAMPLVPLAVSYAV  
LVPVMSVSRWLRKNTILYVGGFIGLALALGFNFYLQRMARIENPVLLQNMLTQNQLNF  
ADIADWWPPAWLTMQAI AQGRTALGSIAATLANLALGVALTA AVAFLFGKSYVKILVNFG  
ETS AVKGTLNQTQAGSIFRARPVFLSLVQRELRLMNREPMYLLNGPFVILLPVIFAITF  
IAQGDEMARGAVDQIRPYLTGQAEYLIPAGLGIFLATATSISCTAFSRDAKSLHFLKSLPL  
RPRDIIAAKL VHALIFAALGIVLGTVGGAIMLGVSTLDAIVALLLAIFGSVALNMGLLAI  
DTFWPRLSWENPMSALKRNPNAVIMILGSMGLIAGIGVLAATLPLAKYTFALLYGTIFVA  
ACFALGFVLF RAGEKRV RQMEP\*

>SPBDM4\_v1\_40709|ID:27158014| Holliday junction resolvase-like protein (modular protein) [Uncultured spirochete bdmA 4]

MKLMHDDMARWFLKESVYAECMNGFGVQSQSWYLSSWFIAVMVFFFAAICVAGVLAYR  
AGKRRGLLEAQLAERDRMDLARKDAVERSRSALSQVSEQIAPWLPDFPTSPADARFIGK  
PVDFVSFCGADEGMVREIVFIEVKTGRSSLSTVERSVRDAIVQGHVRWVEYRIE\*

>SPBDM4\_v1\_40710|ID:27158015| pckG| Phosphoenolpyruvate carboxykinase [GTP] [Uncultured spirochete bdmA 4]

MSTIMQQPSYVRNERLLEWVSGMKALCKPDFVYWCDSDEEYETVCRSLVASGTFLPLNS  
DKRPNSYLARSDPSDVARVEDRTFICSQRKVEAGPTNNWMDPKQMKGILNTLFEGCMRGR  
TMYVIPFSMGPIGSPMSYIGVELTDSAYV VANMRIMTRIGQKVIEALGESGEFVPCMH SV  
GMPLEHGQKDVWPENPETKYVVFHPETREIWSYGSYGGNALLGKKCFALRIASVIARD  
QGWLAEHMLILGVESPEHEKTYVAAAFPSACGKTNFAM LIPPKAFEGWKVTTVGD DDIAWI  
RAGKDGQMRRAINPEAGLFGVAPGTSEKSNPNAMATIRTNTIFTNCALTPDGDIIW WEGMSK  
NPPEGLIDWQGKPWDPTS GKPAAHPNARFTAPIQQCPSVDPDWKNPEGVQIKAFIFGGRR  
STVYPLVYQAFNWIYGVYLAATLGSETTAASTSAIGHVRRDPFAMLPFCGYNIASYFN YW  
LRFGRSNGNPPRIFGVN WFRKDKDGNFLWPGFGENIRVLKWIVERANNHGKAIESPIGWM  
PRYEDISWQGLDFSKERFNE LMSVDRDLWANEILSHEELFMKLYDRLPKELIFVRELMLS  
SLWRAPEHWEFATVSPHMYNE\*



>SPBDM4\_v1\_40711|ID:27158016| exported protein of unknown function [Uncultured spirochete bdmA 4]  
MRIFYIVLLIVVGIVAVVFAGQNSTPITVAFFGWSTNASMSLVLVITLAAGILLGVLLLL  
PSVWKRTHALSAQKKKTREAENQLKNTGSIPEPKPSSPTESVTKENVSQDKPSVGGEAKS

\*

>SPBDM4\_v1\_40712|ID:27158017| conserved exported protein of unknown function [Uncultured spirochete bdmA 4]  
MTKNMGKTDKTIRLIVAVIAIFILGTGVLGTGAWAWILGILAVFFAVTSAISFCPLYTVLG  
ISTASKAEKEKPKEEEKK\*

>SPBDM4\_v1\_40713|ID:27158018| putative Transcriptional regulator Crp/Fnr family [Uncultured spirochete bdmA 4]  
VKCINCINTFCASLPSEISEEMCRVAVHSHKNAKEFFVKSXVGPNGYLYILSLGTVIPYRL  
ASNGNEIGVDCLHAGSILGLCDFLNGNADQITVYAKTNIELCAISVIKFDRLRSRCPAIN  
DSIIKMLGVRLKHSYIKLGYTLGDSIEKMLYQLDELFEQQDVSINFTHDELALLTGMNRV  
TVSRVIESLKQRNIKPLGRGRFVYINSLDQEFGGPSFKKINRKESSLTLVLK\*

>SPBDM4\_v1\_40714|ID:27158019| putative Divalent anion:Na<sup>+</sup> symporter (DASS) family transporter [Uncultured spirochete bdmA 4]

MKNVKRVFSVIAVLCIFGFKYIPAPEGLTPLSMEISGVFLGTIILWLTVSITWPSLLCIF  
ALALSPLYTVNQALSASLGNWVPSFVLFSSALCYMLSKTGFLKRCAIWFITRPISSKKNPW  
MFLGLLFLAPLAIGSIMSPITTFIIFIPIIEQIFIELGYQKGDRVPKIITLCILCFSSVS  
TMTTPIAHTFPILGMSLYSQFSGGAHIDFVSFTIVGVISSLILFVLIMLMIKYCFKPDLS  
RIQNVDTTEFLKDMKPMGKEEKIVLTVFLSIVVIWVMAPGLITGIMPQTAKFLDSLGAIP  
PLIGLIVLSIIKIEGKPIMNFAEVMSKGVWSSWLLVATTIMLGSAITNKDVGLTNWLG  
FIAPAVSRLPPMICVLAIVSITVLVTNFATNAVTVTLVSSIVVPLVISGAIPNLNAPAMA  
TVIAMGSCVAMATPPSTAPAAMAIGTDWLDGTMFAGWGMFMAIASVVLTFIAYPLASLL  
M\*

>SPBDM4\_v1\_40715|ID:27158020| putative Peptidase, M24 family [Uncultured spirochete bdmA 4]  
MSEKDRREKLFFPIQAELEERRHKAARAAMKTKGIDCLLMQNSTKYLGGYVRWFTDVVAE  
NNFPVTVIFPMDEMTMISLGGAPRPAFPPLWATYGVKEVLARPYLSVNYTNTYDAKAA  
VETIKKLNARVGYVGFAPFIPMTFDKYLTAANLPGVEFVDMTEEIDRLKALKSDVEVEYIK  
KTAAVQDAVMLALPALIHPRMKVIEVHNIIQHILSDMGAEFLLMLGTAPFGELAKHSSP  
YLQNKVIGEDDYMNIMIETNGPGGYYTEVARVFCMKEPPRDLDDLWDLNVKAQDRTVAKL  
IPGAELKPIYEQNNEFLVSCGDQPDTCVFAHGQGYDVMERPLIRPEEPIVIQPNMNIAVH  
PRLSGPTSFTFCCDNYLTTQGVPIRLHKTPREVFMIPH\*

>SPBDM4\_v1\_40716|ID:27158021| protein of unknown function [Uncultured spirochete bdmA 4]  
LRHLRTVSTKPEQMOSQFQKQQTFEIGSIYLDMVTIFDYCSEGYGKILRFVLST\*

>SPBDM4\_v1\_40717|ID:27158022| conserved protein of unknown function [Uncultured spirochete bdmA 4]  
MDFLVASLQDMRRKNWAPGDLDAIIVTGDAYVDHPSFGAALIGRLLEAHGYRVGILSRPD  
PDDPEAFRMFGRPKLAFLVTAGALDSMVSSYTANKKPRSKDEFAPGGDRSLCMRADGTLG  
LGVGRANARPDRAIVYANLCRQAYKGVVILGGIEASLRLAHYDYWSDTVRRSILLD  
AKADLLVYGMGERQILETMRRLRAAGEKGTVDLRGIRGTVWTVHASKLTEALGDRLPEE  
RGGHIPGGAAPDAATLPAYDTIQPDTEEGRAFAASFQIYRNTDPWSAKLLVEPCGDRF  
VIQEPPEFPLPRGELDEVYGLPFLHEWHPMYRGGFVPALEVKFSLVSSRGCFFGGCSFC  
ALSFHEGRVVTSRIDSIVREAQSFAMKPDFKGYIHDVGGPTANFRGPACAKMAKHGACI  
DRRCLAPQPCPNLEVDHREYRELLQRLRGLPGIKRVFIRSGIRYDYLMLDKDQSFSDLV  
RHHISGQLKVAPEHVSNHVLELMGKPPLESFDRFAEYARLNKFKGKKQYLIPYFISGHP  
GATLQDALELALYLKRFVFPDQVQDFYPTPGTLSTAMWRARMNPLDGTVPVYIPRGAKER  
AFQRALLQFSKPENRALVREALRILGRTDLIGKKECLVGAETNS\*

>SPBDM4\_v1\_40718|ID:27158023| putative Transcriptional regulator TetR family [Uncultured spirochete bdmA 4]  
MAMPKNSAKRNEILRCAYRLFTESGYTKVFLRDIASEAGISKSLQHYFPKKNVDVIQSI  
EETLSISFEYVENLIPAEGELFSLSVYTRLFWESVSKDKKWDRFNINVISHRELLESWI  
DIIYRWLRSMKDSHLEQIKERDLKIALTFSITGGMELYLIRDELQVEVISICEQITTSFM  
EILNCQNDEIQATLKKTHEMLTSKNIDAFTVFCEDKIQWLNSP\*

>SPBDM4\_v1\_40719|ID:27158024| 4Fe-4S ferredoxin iron-sulfur binding domain protein [Uncultured spirochete bdmA 4]

MDSVKVLPKGKKEITVERTAVAHINPKNCVNCGTCRELCPMEAISESRVICRICPECTE  
QDAMTFDEMYEFTTKAACTTGCPGSPQGYINLRTGKLEEAAYKLVWDKNPLPSVCARI

CHHPCEQVCKRGVLDVEPIAIRSIKRYLGEKTTFRAEKYPRLYEERIAVIGAGPAGLTAG  
QYLSRAGYEVTVFESATEAGGMLKRGIPEFRLDRSVVDEEVTNLENAGLAIRLNERINKH  
SLEKIQKEYDAVIVAAGAPNSKELKIEGWRLSGVMTAMDFMEQVNRHQEIRRHGPGQIFNL  
GGEVVVIGGGSVAIDTARAALRMGATKVTAVCLECDDEEVPCHPWELKEAEDEGITLIQSH  
SPTRFVGTYPKLEGVEVCKVTSFSKDGKKGKISCELDENDTMTIKADWAIVAIGQAPDTMW  
SSLKGDVYFAGDISKSACSVIDAMASGRKVALNVDTDLRGRTLKDPMDTHELHSAPLSE  
KIYPYNRRKSIRPEIPMLAAESRIHSFDEVEGGFDDEAAQMEVLRCLRCGYQVVDEERICI  
GCGICQRECPEGDVITMEPVAKGGEK\*

>SPBDM4\_v1\_40720|ID:27158025| putative geranylgeranyl reductase [Uncultured spirochete bdmA 4]  
MKRQVVVVGAGPGGCTAAFYLAAGIDVLLIDKETWPRDKICGDSYLPALYPFFEDMGIM  
NEMKAAAACNPKALRIIDPDEEYADFDVEPWLIAPRRIGDDIIRRGALTSGADFMENFQA  
EELIIRRGVVRGKIGIYNNREIEVEADAVVIADGSHSALARQLGIYKEDPEYILYAGRAY  
YDGVGMEEGKFEFYTPSTLPKPTYSPICLTWVAPLYQGKYASVGITIAEKYLRETGMT  
LEGLFQWWCENTKFRERMHNARPVEKLLKGWRLPGSRKIEKNYAPGAVVIGDAVSSAEAA  
FEYGIPSSMIGGRVAASFLPEVLSSGDFSEKKFSEFQTLVGKELNPGLEYNANFRDNILA  
NKKTMKQFQLWAKTQPGYPHLYDQSVVKFITEVLHKEIVLSDKKITQ\*

>SPBDM4\_v1\_40721|ID:27158026| GntR domain protein [Uncultured spirochete bdmA 4]  
LTRNIIRIDRVISDQVAKQLQSLITSGEFKVGDRDLPTEENELCAQFGVGRSTVREALRVL  
VAMGMIRIQPGKGAFAVAKDEDNSFDAIKYWFTEKHAELSELIEVRMAIEPLAVRLAIQRA  
SPESIRQIQEIHNFAKAAQKDHIELAILDESFHNAIYASGNSLLIKIGKLIADAMKE  
FRARSFAVSENISHATIPHEKIIAILKKDENAGVAAMMSHLEISKEDMEKVVNI\*

>SPBDM4\_v1\_40722|ID:27158027|dapA| 4-hydroxy-tetrahydrodipicolinate synthase [Uncultured spirochete bdmA 4]  
MLQKEKYGKRLVPIVTPFKEDMSVDYDALLQIGEILIERDYADSFILGTGTTGEFFTMNYD  
ERVKIFEMMKKHFGSRIPLIPHTGAASTMEALALTRKAKELGYDLVMIVAPYYTKPSPKE  
LVNHFSIIADSVDVDIMLYNIPIFTGVNIEPTNLKELIKKNIVAIKEEAELRPKQMSEY  
LLATPDNFIVYCGDDTMVLEALAQGGNRIGGFVSGGCHLFGDRMKNMINLFLSGDVIEAG  
KIQLSLLPLLRSLTQNGRNNPVCLLKGAMNLIGYPKCLPRLPLMPATPVEMELVKDKMKQ  
LGMPL\*

>SPBDM4\_v1\_40723|ID:27158028| TRAP-type transport system, periplasmic component, predicted N-  
acetylneuraminate-binding protein [Uncultured spirochete bdmA 4]  
MKNRVFSFLVMLMFIASAGAAFAADTGAQYTIKFSWADPADPLKQSTSAYALVFQQEAER  
LSGGRIKVELYPAGQLGDQRSSTEQVARGTIQMTNISSGVLASLYFPKLEILDMPFLFSS  
REHASRVLDVQTNPFMIKLDNDLIKATGIRLFNVVPPGPRHLTNNKRRIRTPADVKGKLI  
RTMEIVPHQKLIESMGGTPVPIPFLELYTALQTNVVDGEENTIQNILAQNFFEYQKYLTI  
SNHVMGVGATLINEKFYQSLPNDLKAALVEADHVAQM VYNGLAQVLDATGIEVLKEKGMD  
IYYPTPAEYKAFQDVAIPYVRKYMEQKLGASFVKDFLESVDETGKEMKAEAVK\*

>SPBDM4\_v1\_40724|ID:27158029| putative 2,3-diketo-L-gulonate TRAP transporter small permease protein YiaM  
[Uncultured spirochete bdmA 4]  
MNEKKKSVFIYHIEISNCSLAIMFLSVMAGVISRYILKSPLFWTDELSRYLMIYMVFFG  
SALSFRADKHPSLTFIIDKLPKKWRLIWDLVIDLLLMAILVLLIWGALDMITSGPVGFTP  
SLRIKFTWVYWAIPLGSISMLIEIIFRLYRRIKNLSHSYLSPSQEKTGEY\*

>SPBDM4\_v1\_40725|ID:27158030| conserved membrane protein of unknown function [Uncultured spirochete bdmA  
4]  
MSLALTLMLILFAFFMLAGIPLSFSMLLSSAVYLIMTGKPLYLLAHRMFTGIDTTTLMAI  
PFFIMAAEFMVLSGTAERLLKFANVLVGRFRGGLAYVNVLASMLFGGCSGSAIADVAGLG  
ILEIDMMEKGGYDRGFSTAVTITSSIQGPLIPPSIMMVLIGATTGVSIGALLIGSAIPGV  
LVGLSQMLVIFLIGRKNKFNPKSNILSPKQKLLALLDAFPFLMPIIIIGGITGGFVTPT  
EASAVAVAYGLLLVFIYGRNKVKIKDFWKILYNTVIVAASILLSSGSSNIFGWILSTEKV  
PNLISNAV MGLSHNKYVFLILMNIFLLLWGMIMDSLPAIILSPVLFPIAMRFGIDPLHF  
GVIFGFNLIIGLITPPYGAALFTGTIISGLSMEKLTRNMLPFILSSILILITTFIPEIS  
MFLPRLFGLR\*

>SPBDM4\_v1\_40726|ID:27158031| conserved protein of unknown function [Uncultured spirochete bdmA 4]  
MQIRLSSGMMHETIEVSEKHIAGILCPNTSSAFAPLDDNMIRNAINHPVNSLNENRTTS  
SSKVAIVVDDATRPTPTSRLSILKLSGIGIPDQNISITIAATGLHRNTTAHERTLILG

DDVISRFDIADNDARNPIAFAHAGTITGGKEIYLNKRILEADIVITIGVVKSHAFAGFTG  
GAKSILPGVASQNTIHNCFYNIIEYPRGVLGSCEMSATRKEMEATARLVNPFIVNVVLG  
DSNQIYAVSGDVVDAHRSVDFYKIALRTFPEKVDIAVVHGGLAGSINFYQALFGCNV  
VKTTERPILKKNVILFAECKEGSGSKLLEQIMPTFSEPDEILKYLASNKVFDDQWAVQ  
FLATFLRDIHIFLVSEGVSSIAKNLKVKLPNAKEALDAAIQTSDDLDIRMAFIENPDVL  
IVNLA\*

>SPBDM4\_v1\_40727|ID:27158032| Electron transfer flavoprotein subunit alpha (modular protein) [Uncultured spirochete bdmA 4]

MHILVLIKQVPETDKVKMDPETGTMVRSGLSEIINPLDLYAIEEALVLKERLGAQVTVIS  
MGPPDAERALRESLAMGCDNAILLTDRAFAGSDTWATSRVLAEAIRRAGDMDLILAGERA  
TDGDTGQVGPAAWLDLPILTYASALEIEPASAAVESPILSKTTPLAIRVHRLTEEGYQ  
VLQATPPCLVTVVKEVASPRLPTLRGKKFARSAEIPHWGARDIGLDPVSVGLAGSPTRVV  
KIFYPKVARNGLRIMATDEAGAIEKAISHIMALFENRLLGKATVEDGASAPSAPLAASSA  
LRSALERSPVAGGAPGPDTAEASAKPEFWILAERRTDGLDVVSFELLARARALADNRGAR  
LAAVVLTSSEDAEALIAHGADRVAIEHPLLRDFLCEIWAELRLVRGRKPEVFLA  
AATTTGRTLMPYLAAKLGTGLTADCTELAIEEETGLLLQTRPAIGGNIMATIKTAHHKPKQ  
MATVRPHSMQPLPADSGRQGTIVRVAGAPLAGKDSPEPPVRILALERNAKDFENLEGARI  
VVSNGRGLKKADNFRLIRELAHALGAVVGASREAVDRGWVSYPHQVGLSGKTISPEIYLG  
AGISGAIQHLGIRTAKTIIISNDPDAPIHAVADLAIVGDLEILPRLTARLRQRSTGA  
APHEPSILSPDTPAAAPPAENKASASSREARS\*

>SPBDM4\_v1\_40728|ID:27158033| FAD linked oxidase domain protein [Uncultured spirochete bdmA 4]

MIYNHINKEIISELIQIAGERNVLVDPARIEAFSHDETSKEEYGHMPDVVVTPQSTTAVA  
EIVRLANRTRIPVTPRGAGSGLSGGAIPVYGGIVLSLEKMNRVREIDYDNLMTVETGIV  
TNEINNLVKDKGLFYAGYPMSLETCTLGGNIAENAGGGKAIKYGVTSRYILGLEFVTPAG  
EVVWLGGKLAKDVTGYDLVHLIVGSEGLGIATAAIIKLIPLAAKSDLLVLFHSPQEI  
SCVPIILSKGLIPTAIEFMDRRSVETSCAYLNENLPYAECEGAMLLIEMDGRNPALVESET  
EAVGDLCEMEQGAIEVYVADNRRTQERLWAIRRNIAEAFKVYCPVQSLEDIVPPAAIPAV  
IPELDRISEQFGITIPCYGHAGDGNLHATLVKAPGMPLDQWRIEQALAEALYEAITKLG  
GKISGEHGIGLKRKEFMKKFMIPTLELLKTIKRAWDPNLMNPGKIFDMES\*

>SPBDM4\_v1\_40729|ID:27158034| dTDP-4-dehydrorhamnose reductase [Uncultured spirochete bdmA 4]

MKILVTGASGLLGRSLMKFLAERSDLEVKGVAFSRAVPPLEKLDLTDESAVALFFARHSP  
DVVMHLAAERRPDVVDALPKAQAINVDATQIIARSCAGRGAFLLLISTDYVFDGTSPPY  
YDPSVHPLNAYGRMKLEAEYAAEVALSGAVRSSEGRSVGAVLRIPILYGPVESLEESSV  
TEVAFALKSSSPRKMEHWARRYPAHVDDVSSAILAVVDACRNGRCSYGPFPRFLLSGDHA  
YTKYEMAQIMAKALGLDARHIQPDPSPPSGAPRPRDCRMDTSLLESIGWCQKKEFESEIG  
GILRPFFF\*

>SPBDM4\_v1\_40730|ID:27158035|pdxS| Pyridoxal biosynthesis lyase PdxS [Uncultured spirochete bdmA 4]

MEQKLWSSRQSEQWRIKVGLAEMLKGGVIMDVTNAAQAKIAEKAGACAVMALERVPADIR  
AQQGVARMSDPKIIKEIQNAVSIPTMAKCRIGHFAEAQILEALGVDFIDSEVLTTPADDH  
YHVFKHDFKVPFVCGCRDLGEALRRIGEGAAMIRTKGEAGTGDIIIEAVRHMRAVRDGIAR  
LASLRDEELMTAAKELGAPFELVWEVAKTGKLPVPNFSAGGVATPADAALMMQLGAESVF  
VSGGIFKSGNPELRATAIVSAVVNYRDPKILAEISEDLGAPMVGIGLDELAENQKIAGRG  
W\*

>SPBDM4\_v1\_40731|ID:27158036|pdxT| Glutamine amidotransferase subunit PdxT [Uncultured spirochete bdmA 4]

VSGPRIGLLAFQGDYEAHGKALARTDIASITIVEVRCLSDLEGVDALIPGGESTVMGML  
LERFGMFKALKTRIEDGLPVLATCAGLILLAKNIEGSNQARLGVLDVTVLRNAYGRQIDS  
FHAPVQTSIPQTGTIDGVFIRAPKITALGEGVKVIATYRNEPVMVRQGSIVAATFHPELL  
PDASLHRWFIQSFLKTPQE\*

>SPBDM4\_v1\_40732|ID:27158037| conserved protein of unknown function [Uncultured spirochete bdmA 4]

MYHNTEYCLVLGGGSGKGVYHIGVWQALQQLGIPVGAFLGTSIGAVIAAFLAQGSGKFL  
ERLGQEITVDNVINLPDGFARDGEIDIGLHTISSIPHFFASILNKGDLTAPFRRLIGDN  
LDEEALRKSGKDFGVVTLVDVTNMKPREVFLEDMENGVVDYIMASSAFPGFKNPQIDGKS  
FMDGGMYDNIPYAMARKRGYRKIIIVSDLSGIGRTRRPQIDGCITVYIKNSIDMGWTFNMK  
RDFLNAFMLLGYLDTMRTFGRFTGYSYFLEPDNELEQVYAPDPSIPFDKPKQYMCYDRRE

LLVALECAASILNVEKIHAYSIGELEKAILKSARETEDKIVRVVQTSKERIISLMKELKE  
AVLNRNFTECPYYYYRVLVTALFQPSSSEILKKALERLNPELPIGVAWIACHVSRSPVAIP  
AEFLAKRTE\*

>SPBDM4\_v1\_40733|ID:27158038| conserved membrane protein of unknown function [Uncultured spirochete bdmA 4]

MYRKLLYVAIYAIGMAYLEAAIVVYLRRLYGITDLMTSAPPFDPQISLIEVGRELATLI  
MLLAVGLLSGKRLQSKIGFAIYAFGLWDIFYVWLAVFIGWPKSLFDWDLFLIPLPWWG  
PVIAPVMIAALMVLGSGLALEDKERILRPTKAEWLLVLGICLMLYVFMADAIAQMPA  
SIETLARLRPSSFLWGFFVVGYLISAYSARILSAKSVGKPSVSNVSGRENNVS\*

>SPBDM4\_v1\_40734|ID:27158039| CDP-alcohol phosphatidyltransferase [Uncultured spirochete bdmA 4]

MKQKHNSQFDHVLFLISQGRNRTNLLKKQEQAIAFLVQYIPSWVSPNMLTGIGFFGNVI  
VLSFILGARIDPRFLLGVVGFSAISWFGDSLDRGRIAYRNTPRKWYGFSLDLVVDWIGI  
VLVGLGFIYAEGFSKILGYGFIVLYGLEIILALLRYKISGEYSIDAGKLSPTEARIFIS  
LFLVLEVIFHGTMTYMAGLANVVLAFSNFTEFKKLARIADQRDEEEKKKKNVSKISDIQV  
N\*

>SPBDM4\_v1\_40735|ID:27158040| GtrA family protein [Uncultured spirochete bdmA 4]

MHHSILTFSKAQISSFIGGVVDYGIMVLFTELLHVHYTISIAFGGIIGAVINFSVNRMWS  
FYKTPYKYTVIQQLTMFCPMVLGSIALKSGGTALTSCLKIDYKFTRLAVDAIVSVFF  
NYMLQRHWIFKKKH\*

>SPBDM4\_v1\_40736|ID:27158041| conserved membrane protein of unknown function [Uncultured spirochete bdmA 4]

MVTEILVLFLILLNGFFSLSETALVSSHKVRQLQAEADKGGKAYKLALKARETPSRYLST  
IQIAITLIGILMGALSGTTFQWLAQWLAKWSFLEKYAASVSVALVVLAITVLSVIGEL  
VPKSIALHNPEHIVGLTIQPMHVLSVIFFPVRLSSATDGLIKLFGFSGHRESAITPEE  
VKILVEQGEESGVFEAAEREMVEDVLSLDDRRVTLFMTPTDVTVDVENSCEAHIAI  
ENAEFGYLPVVDGDLHTKGMLAVKRALKHLAEGRFVSVETCMEPPVMVPETFSGLQALG  
ILRDAKKSAGLIIDFEGGVSLVTIGDLLEAMANISEIEQEETPQIFRRNDGSYLDGSM  
PIDFAENLGLNIESVSSDYDTVAGFVLHCSGSIPKAGDVIEWPPLHIEVVDMDGKRID  
KVLVKKAE\*

>SPBDM4\_v1\_40737|ID:27158042| exported protein of unknown function [Uncultured spirochete bdmA 4]

MCVARIVILFAFASLMSVPLIAQQNASPSQAFPGTFDLEFPEGDTLRNITEPVFLGKATF  
LQRLEERNGVQAPATATPSALRAPLGLVLCGGSARAYAHIGVLKALEKAGIYPDFIVASS  
MGAIVGMLYAAGYSPDDIQMLIHAIPLSYFDIVIPTNGGLINTEIFRATFRKLVGKLDL  
SETAIIIVTAEDLKSRRQIWIIEGPFDRVMTSAFAMPAIFEPQPFGEFGLIDAGATIIA  
PVEPALQISDHLIISTAFYDRTMNFSSPITVLNRAVDIGKTRAGMEEIGKSHAFVIRNDV  
ENLSYMQFSDPDIISKGEQSAQAALKLNPNLRSQFENSPLPGFFEHRSLIHNSLVRTI  
QQLQSGEMPSASFMRGLPILKLFEPFSRAPGETGTEPRIGASLVFSISKFRVVSYFAA  
LNPEPGKEWAVETGIRANPLGSLNVWLTRLWGEYGSTYILDHKPEYWEFAGLVKNTAVL  
KNKKIGFQLGGDMLLKTAGTIATWQTLGLVEASSTKQFSKAGPFLQPWYSVEAGGFVENT  
SGAQIASGIQSTLMGGINSTWVSPKARAFKAVSLNGQFAESKFDGFRSAAPRGSALS  
ITNAEIAVAPQDMYLDMAEALLFRNFELAPFFDTRWSNASGEYFHMSDWAAGLSFSFEAR  
AFGLAPATISLYASYAGSKVFTLQIRAGVLLSEQ\*

>SPBDM4\_v1\_40738|ID:27158043| membrane protein of unknown function [Uncultured spirochete bdmA 4]

MKKLKIAAVVFFMIMIAASPVLAQNVTDVHAEKGDLVGFGGVGYGWRGFGISGGVESII  
QKFTIPGFPLTMGVMGIAGLDFGTTLNFSAAAGMATLHWGMKAYKDFPEFLRNFDWYIGLG  
MGVGTVPGGFGVSSGGLSYVNDKLALDLSFYINHFGVSGSGFSETIGIRYALK\*

>SPBDM4\_v1\_40739|ID:27158044| DNA-3-methyladenine glycosylase I [Uncultured spirochete bdmA 4]

MIRCPWCGNDPLYVRYHDEEWGTPVHEERTHFELLETQQAGLSWRTVLGKREAYRDAF  
VDFNPERVARYSEKDIERLLDPGLIRNRKLEAAVTNARIFLAIQEHHSFDDWIWHFT  
EGRPITNTWHTLSEIPVRELSDSISSEMRKAGFSFIGSVTIY AHLQAIGIVNDHLVSCF  
RHAEIAGL\*

>SPBDM4\_v1\_40740|ID:27158045| Ferroxidase [Uncultured spirochete bdmA 4]

MVSQKMVDRINLQINREMYSAYLALAMAAMKLNELGYTGIGKWLTVQYHEEMFHAMKFAEY  
LHDQNAVVAFAKIDTPEFKEKDVKPLFEHVLAHEQGVASIREIMDLAIAEKDYATQTFV

QWYINEQVEEEKNATEILQNIDLVGNSAQGLFMLNTELGKRDPSPVPLDFNKI\*

>SPBDM4\_v1\_40741|ID:27158046| Threonine synthase [Uncultured spirochete bdmA 4]  
MLMNMAVRYTSTRNAHVNVISIAEAIVQGMPQDGGFLVFPVKMPKLASDALFEPNLSYAELA  
WMVLSPWFDWPEQELRPLIEGTYSSTGETPMFDVQEIVPLAAAGSLDCDVRLPSASGAPS  
LFLLELFHKGKTCFAFKDLALSLLGRLLRSTSLEKRGIDEPMLILTATSGDTGSAALSGLGGQ  
PGIRIAVIYPASGTSEIQRLQMTSVPTDGRFVIGLRGNFDDAQRAVKAIFQTASNPGSPF  
YGLRLSSANSINIGRLLPQIVYYAAA WRDLFFSGVLEKGGQAFDVVVPSGNFGDILAARYA  
KAMGIPIRKLVCASNSNRILHDFSTGLYDRRRKFSKTLSPSMDILVSSNLERLLYLALD  
DNP ELVAAMMSEFEHEGFFQLPEHSRTKIADFSAGWANDIQTLASIQHMWEAHGVLVDPH  
TAVACVAHESIKIARTSLRRRAGKELEASPPVIAATASPFKFAACLKALQGPLLSLR  
ENTNDLDAFELSRVTGIPVPAPIAALTTAKIQHHTIAEESDLAALLADFAHQPSKTAQG  
KQLDSTRPL\*

>SPBDM4\_v1\_40742|ID:27158047| putative Homoserine kinase [Uncultured spirochete bdmA 4]  
MIEIEVPATSANLPGFDCLGIALSLSNIVRIKRAARTYLTGCPSQWAGEDNLLLSFRH  
ACSI LQTSVPEIAVEFVSNIPPARGLGSSASLAVAGAAAALLFHTGAEAGTEVDYSAFLH  
RPENLDFLLRAAADIEGHPDNAAPAMYGGFTAALAGRKIIVSHSSAPEHWHFEACIPDF  
NLETSVARKALPDVYPRADVHSLSHAVLTALAIQKADLTMLGRVCE DRIHEPYRRPLIP  
DFEIVETACRAQNAAAVWISGSGPTILAVFD TSAPEKINKSLASDIAERALHSWHIPLQ  
ADNLGIRAHQVRQEESV\*

>SPBDM4\_v1\_40743|ID:27158048| putative Methylated-DNA--[protein]-cysteine S-methyltransferase [Uncultured spirochete bdmA 4]  
MNYSSISEDSSATLPCAPIFCAPLSSFGDILILWEGQDASSLCRIYLPKDVVAQFDRAR  
VDFPHLTLWEKGAALPSAIESIAELLHAILAGRPVQLPFAILEKSLRPLGVFQKQVLMLE  
ATIPFGHISTYRELARASGNSLAFRAVARALSHNPLPLLIPCHRVIASNGSLAGYQGGTA  
MKQHLLLELEGIPFSSEAVDLKRAKLWNFSA\*

>SPBDM4\_v1\_40744|ID:27158049| putative enzyme [Uncultured spirochete bdmA 4]  
MSDETNIKAATVESSVIMPAIFAGHGLAINAALNNDFAKSLSDITARIPSPSAIAVISAH  
WSTPEVHVTSAPRPRQMFDSIEFQQLHEISYEPQGDPSLAETICNLLLSSGINAKNDPK  
RGLDTSVWGILVHMFPDAKIPVVEISLSYHVDTSKIIEVGKALAPLRSRGVLLMGSGGLV  
HNL YEMSKNIDTKPPVWAIETDKKIAALVQSGDAAALSEFTLQNLGHSPA IPTPEHILPA  
IAVLALKEPEDRVSFYEA FQNSTVSMRFSVIEREQG\*

>SPBDM4\_v1\_40745|ID:27158050| putative Ribosomal RNA small subunit methyltransferase G [Uncultured spirochete bdmA 4]  
MNHEQLLARGLAALDFDVSSGISETL SRYLDELERWNPLYGLVNAEGEDLVIKHVLDLSLA  
PWRVLEELFADIESPVAQAGEVRVADIGTGAGFPGIPLSIAFPEHPFILIERLEKRARFL  
ENIVVLLKLDNVEIRQSTVENEHEPLQCVVFRALKPFGDRRVFRSIWKKIQPGGALCAYK  
GRIMHAKLELAELSDDPVLGGLVANARIVPVWVPFLEEERC VVIAKKVS\*

>SPBDM4\_v1\_40746|ID:27158051|pyrG| CTP synthetase [Uncultured spirochete bdmA 4]  
MRKLLFVTGGVCSLKGKIAASSIGALMEARGFTVQMVKIDPYLNVDAGTMSPYQHGEVY  
VTDDGAETDLDLGNYGRFTTAKLSRANSITTGQIYKSVIEKERAGEYLGRTVQVVPHITN  
EIKQRILAVASNPEVDMTIVEIGGTVDIESVPFLEACRQLIHEFGKQNAISVHVTLVPA  
VSGGEIKTKPTQHAVKELQELGIQPDALILRSTKPLNEDLRRKISLFTNVEEEGVISGYD  
APTIYEVPLVFYNQKLDLFLLRKMNVESRHAELTKWQTVVQAITKPNRKVKIAVVGKYMD  
LHDSYKSIWEALCHGGIAHHAGLEIEKVDSSRLEDSNADLEAIFKGIHGILVPGGFGERG  
IEGMIRAARYAREHNIPYLGICLGMQIMVIEYARSVL GWQDAHSTEFNKSTPHPVVCLLE  
EQTRIKNYGGTMRLGAYDAITKAGSSIRAA YGTEQISERHRHRYEVNNDIRAELEEHLT  
VSATTPNGELVEACEWPNHTWSVG VQFHPEFKSRPTSPHPLFREFIKAALNHSGS\*

>SPBDM4\_v1\_40747|ID:27158052| exported protein of unknown function [Uncultured spirochete bdmA 4]  
MDGYKKALKGMFRIASVLCVLSLLFPSCGQQVEENTSDAQAEVDPARFVDLTRKEYR  
GGKLSMQISARLATWYEADQRLEIEGLAFTTYNTDDGSVSASGEADKAVFYEASGDAEFS  
GHVQVRS AEGDV SFETK KITYKRALDIFETPNDAEVVIKAKEQLLMAGKGLLFDVKQKYY  
EIRENVSGSVNQ\*

>SPBDM4\_v1\_40748|ID:27158053| exported protein of unknown function [Uncultured spirochete bdmA 4]  
MKTRAPLWLLVLAMIVGALQTGLAQATPPAAPVPSSPPAGPQTASGKKPISFSARSVQGV

LAKDKQDTILTGSVKIITGSLFITADRVELSGEDYVNVACSGNVTVNDTEKGFSLVAEKL  
 NYQRDTEIGLAQGKVAVNDTKNNTIIDA EWIRFDQQSIFEAAVSVLVLKEDMSIRA EYA  
 HYNRDTEEIKLHGGAIAVTEEGTLKGDVISATSDWSNLQISGEVSGNITSKENSASQ\*  
 >SPBDM4\_v1\_40749|ID:27158054|lptB| putative lipopolysaccharide transport protein B: ATP-binding component of  
 ABC superfamily [Uncultured spirochete bdmA 4]  
 MSMATLEVSRLRKSFGRTLAVADV SFSMETGEVVGLLGPNGAGKTTIFYMIAGFLKPSAG  
 SVRFNGTQIDRLPMFKRAMLGISYLPQEPSIFRRMTVEENILAVLEARSELPLSGRKEKA  
 RTLMEEFGIAHAAKQPAYTLSSGGERRRTEIARALAI EPKFLLLDEPFTGIDPIAIREIKL  
 LIRLSAKGIGVLLTDHNV RDTLAITRAYIISKGIIVAHGEPQSIIDNPLARETYLGQD  
 FEM\*

>SPBDM4\_v1\_40750|ID:27158055| Hydrolase, TatD family [Uncultured spirochete bdmA 4]  
 MRYFDTHAHIGLIYDDPIEQLLVCQQA KLVGVSRIVSICNSLVDFKQVYENLKPAEHVYH  
 AVGVSPSEVSNPGRDWQRFIEESIKLPRVIAIGEIGLDYYHKFGDKRSQIELFIDQLEIA  
 ARLNLPVVIHNREAGRDVLDILKDRMPPAGAVLHCYSENAAYAADILDLGLDIYFSFAGN  
 LTYRNARNLHETVAFLPLDRVLLSEAPFMVPAEYRNKRNMPEYLPSTAQFLADFLNIDV  
 EEVAETTYQNACRFFRLNP\*

>SPBDM4\_v1\_40751|ID:27158056|dus| putative tRNA-dihydrouridine synthase [Uncultured spirochete bdmA 4]  
 MKHSPWPFPPLGEEKWNAPYFLAPVAGYS DAAFRVCTEFGAALCYTEMVSAEALIRGHS  
 KTRELLVRDPVEKQYAVQLFGSNPETLAKATEIVSAYNPIVIDLNCGCPVPKIIKAGAGS  
 ALLKTPERIGEIRAMRNATSVPI SVKLRTGWDQNSINYPETSSAAIEAGACAITLHGRT  
 RAQGYSGKSDWNAIRSLAEQTTVPVFGSGDV FSAQDAIDMRRTTGCDGVMIARGALGNPF  
 IFTELRRHSMQAAMEPSDAPSPRTIAQTA AHLELAIKYLGEKTACIEFRKHFCAYTKG  
 FAGGAGLRAQAVHCATFKEYEALFKEFGTIAGSPTLSGSSF\*

>SPBDM4\_v1\_40752|ID:27158057| exported protein of unknown function [Uncultured spirochete bdmA 4]  
 MKKKMYKYISGLAGGLAIFLLISFLSGCDQSPQSALVWTDVPELVIAAQIFNKENDRFAV  
 DVEYKANVASEMKTNKPPSLVVGKYL LSKSLTKKFVSLDVLFSKYLDPNDMYPALLRA  
 GKQGA AHILMPLSFD CMVLVERKSENE SAGVAVLNPDLVQSSSEAFTRIGNGEISAMGFS  
 PRWNLEFAEDWLLAGGTGFSLNQNWKSTSAPK PNEANSWPILWDKGNLEESVGALLSFNS  
 NVTTEQEDAFAYTYFNKPGYQLVLDNRVLYWPMKASEFFRLPYSAKTQLRYRFPV NQKL  
 LLTADTRYMGIPKGAKNKKAALAFARWLFVAGNQEKVWKEMESQQLLPDYVGPFGGFSI  
 MQMNETVFSKYFPEY AQNPLVPSALPSVTALPDYWG SFSRDFLRHWLESVLSDSASSGSI  
 DERFCASLEQYLG TMPDWRIEDR\*

>SPBDM4\_v1\_40753|ID:27158058| putative Radical SAM protein [Uncultured spirochete bdmA 4]  
 VQELRDPKSMPRINWHSQCLKARYDEHVWRLGIDAGFTCPHRSPDRLQGGCRFCAPDGNI  
 SAYQKTQAPVPSMEKQIELALIFTRRRYHAN AFFLYFQAYTGTNAATKTLTQVYEN AIDA  
 FWRVYEKVG EAPRAAPETHAPKMGPLKGIIVSTRPDCFDQEKADLLAAYMEQGM EVWVEL  
 GLQSAHEETLSFIRRNHG VKAFLDAMEIAKRTHL KRTVHLMLGLPGESRTMMIETAQLAA  
 STETEGVKFHDFRIVKGS AFARNFLAGEITAMHPSRLPGLLADCLEVLPPSTEIMRISAD  
 FRPEESVNIHPPTDKHTL ARLVEDEL VRRNSCQGQRFAG\*

>SPBDM4\_v1\_40754|ID:27158059| DNA polymerase III, subunit gamma and tau (modular protein) [Uncultured  
 spirochete bdmA 4]  
 VPQSAWPYALCLLYPSMPPCYFSYMPFEV TATRKR PQTFEQLAGQNFVAATLISSLEQGR  
 IAHA YLFSGPRGCGKTSTARILAKALNCEHGPTPHPCGSCPSCLAISRGSSLDVIEIDGA  
 SNTSVDNIRQIKDEVLFAPNSGRYKIYIIDEVHMLSMSAFNALLKTIEPPPYIVFIFAT  
 TEPHKVPATIKSRCQQFNRLVPVEVILQLLRQAATETGIEAE EEEALLWIAREAAGSVRD  
 AYTLFDQIASFSGTMISAQNIRDTLGLV GIDHLNDLFR AIVASDTKEAFSVLDEILGRGV  
 SPEQFLTDAVDYCRSVLLILYGVQKEGLLSAPRTVFEPAVLASLSKTQIEYAIALLLDTY  
 RHLKETIEPRYELELAVAKLCHIKSYISPPEL FNALHSVQQAIKAKEIPPRGQREK DASL  
 PFQGRPGNSADAQSAPLLRDLHSRFAANQ QSANPTEPDEATEVHAPASGAISSSELKKK  
 IIAKLRGQNLFLASALEKSAEWTKKHNGFIIPVMNHVEMDIISRFSSLIAETGAEILGTP  
 CAIEPHFAKDQENHTPPSRQSESR TASP LQRETPQQAPHPPAASKSHEAAVQPEPDIEYN  
 SPTSFENSFPETELDTTAEFENTTRI QDEQALPETDARTIELIRKMFKGKVIATKLPSEA  
 PSPEPLAPPSFPPE DASESREFSEGSEELIDTEEDFD\*

>SPBDM4\_v1\_40755|ID:27158060| Nucleoid-associated protein Spica\_0202 [Uncultured spirochete bdmA 4]

MDVSNIFDMLKNPQALKAQAEEMQRKMNAIRATGEAGGGMVKITLSGNMELLECYISPEL  
SEFKDIPLLQDLIRAAHNAEAIKEAMQNEFAGSMGGSGMPLGNYPGNFPGTEV\*

>SPBDM4\_v1\_40756|ID:27158061|recR| Recombination protein RecR [Uncultured spirochete bdmA 4]

MKAIEDLVSLTRLPLGLGRKSALRIVYSLLKSDISFSETLAERIRTLRTTIHFCSECGSY  
SESELCQVCADASDRSIVCIVEQPQDVITIEASKEYRGLYHVLGGLLSPLEGIGPDQLN  
IGKLIQRIHRFATSVPIQEVVIATNPITIEGDTTALYLKKLLEKEPVRVTRLATGIPVGG  
DLEYADRLTLARSFRGRSPL\*

>SPBDM4\_v1\_40757|ID:27158062| conserved protein of unknown function [Uncultured spirochete bdmA 4]

MRATEIARIINAEIVAGEEIAYNLDIETACGSDLMSDVIAFVKERVALLTGLTNPQVLR  
ADLMDIRLIIFVRGKKPSAEMIQMAREQGIVLMKTHNTMFTACGELYQAGIKGDSSCGDH  
\*

>SPBDM4\_v1\_40758|ID:27158063| Anti-sigma regulator [Uncultured spirochete bdmA 4]

VVIIIEYIIPRLDFAAGKASTDMKHRLTQLGLPPALIKRVAIAMYEAEMNIAIHGDGGRA  
EIEISQEGITTRFIDQGGIADIELAMQEGYSTASEEIRDMGFGAGMGLPNMKNADEFI  
IQSEPNKGTTVQMRFRLPAGEP\*

>SPBDM4\_v1\_40759|ID:27158064|ffh| Ffh [Uncultured spirochete bdmA 4]

VSFEPANQSPNIFQTFHVSLLDADLCVGCTTCIKFCPTKAIRVRNGKAKIFEDRCIDCGE  
CIRRCPKGAKKAVSDPLFMMDAYDIKVALPAPSLYAQFGTKYSQSDIFNAIHSAGFDEVF  
DVAWGALVVTMTRSILAQEALRPRISSACPVIVRLIQQRFPSLIPNLMPIPPSEIAAR  
EARRRLGSLSQKVGIFFLSPCTAKVTSVRTPLGYEQSAIDAVFSFGDIYASLKRALDPTP  
SSAPHIDAISSGNASTHLLPIMNNLEPGMGWARSDGELDALHIENA VSVDGISNVIELF  
EAIENGNIDSIQYIEALACPGGCVGGPMAVENPHIARSTMRQRYQHPFSA YPGSKTAQDH  
HRTAKERSKSLSPESSTADKEYLAFKWTRPLPPNPVLVLDTDLSKALQMAEKIEQIRNRL  
PGIDCGACGAPDCDAFAEDIVRGLSSIEDCRLLASPPPARNEEENPK\*

>SPBDM4\_v1\_40760|ID:27158065| conserved protein of unknown function [Uncultured spirochete bdmA 4]

LNKKDFPHIHFYDQDFVDVYDRTWAWIADCWTNGGSQTKISKTKFFYYPEQKRLDFLEQV  
FSSFFLVYSNRIYPASNGLDALYALQEPDGAHTAYDIETGEPILPKDNPHGVTLPPLAW  
AEFNLYHKTANKKRKRVKEVMPMLSKHYKWLEANFKMPNGLFATPLSSTGMENTPRTDVR  
YFIDFNAAMAMNALYLSALGDILNDKDA SFQYKRDYFSIKTRINSKMWNAEDGFYYDLGEHE  
NQIPTKTLGTYWLLLAIEPNEERA EKLVAKLKEPQCFGTENPFPSLSADHPAFDKKGGQGF  
RGSVFPWLTFMVIKGMKEYFYELARDSAIRHLYIILDSMHSNEHEGNRHNNHPTVWSAY  
QPMNEGKAVWDGHPPEWPLQNYFPSNGLCTVTLVIENVIGLYISLPRKTVDWIIPNLEVMG  
IENLSLKRNMITILSGKSGRGWEIHMESEKLYYFTINVLGKKKKTLPPIPSGKCSMLIDKI  
\*

>SPBDM4\_v1\_40761|ID:27158066| conserved protein of unknown function [Uncultured spirochete bdmA 4]

MTGRVWNPGANLPFDPIAAAKAKELGLRVIFASGSNLENFDKILSEKSFIGHTIID\*

>SPBDM4\_v1\_40762|ID:27158067| conserved protein of unknown function [Uncultured spirochete bdmA 4]

MTIVISLGGSSIVAPQEGPSGLFLLQFRNVLLSWLEAENRKAIIVVGGGSAARQWQKAYKE  
FIEQAAERETSNDGNGEVEPAKALYLDESLEDRIGIAATRLNAQLVREVFSDYCPDSVVT  
DPSADISMRGEILVAAGWKPGFSTDYDAVLLAERFHANQILNLSNISQIYSADPKKDPGAK  
PLAHITFDALL\*

>SPBDM4\_v1\_40763|ID:27158068| putative Peptidase M20 [Uncultured spirochete bdmA 4]

MGKSDDPIDTQSLAIRLVKSASITNTSGEVSPDILIPILREISFFNSHPHEHIQEFYIEG  
DEWKRRIVIALAPGEGTSCVVLVTGHYDVVDTSNYGALEPFPAFDPETLTKKMLQSLSSKEK  
LSPPEILLKKDLESSFFVPGRMMLDMKSGLAAGIAALADFLGDDERSGNIVYMAVPDEEG  
SSVGMKAAKKILSAFASEHGLRLKAIINLDAAVDQGDGAEAKAVFLGSVSKLLPFVLFV  
GKPAHAGAPDFGNPMAASVFAEAECNSECLNIRTVPGEPPPPTILYREMRSDYDV  
TMPADVFCALNVLTFEKNPAKVFENVTLVQKALDSSISLLYERMSAFSRKQNEHVVMQK  
LSSEIIDPELINRAEYVAPGILDRRLRVAEKSPEDKVLQTAKIVHELLTYAQIEGPCA  
IVGLAPPYYAKAELSDRDQLFLAYVKDEINQFNDRHEESVKIRPYFPGISDMSFLAPSV  
DAQSIEYIKQRSAVDQPDLEYLKDSLDPVINIGPWGREYHQCGERVNRHYAFNLLPEL  
VFKICQRLLENL\*

>SPBDM4\_v1\_40764|ID:27158069| AMP-forming long-chain acyl-CoA synthetase [Uncultured spirochete bdmA 4]

MMKRTVLRMLKEAAAQYSNIPYALKKADSGYVGTTFLEVREQARKFAAWLLVNNFKKGGDK

ATIIEGSPPEWLVSELGVLCAAGMISVPLSIKLLADEIPFRIEHSSESKIICTTHNQLEKIA  
NALVIAHTPDMRIVYFDDVDWGRSVLSKSKIPEDCIISLKEALSAGASLLAQNDEYGGQK  
LDLIEEETEENDVVTISYTSGTTGNPKGIMLSHLNYWSNCHDAIDLFDNPMYFRLLILP  
VDHSFAHTVGLYTAMICGISLYFVDSRGGGIATLRNIPANLKESDPIFLFTVPSLSGNFM  
KKIIAAIEEKGGIIESIFKKGIAAGILWNGDGYHKPPFKDRFNAPFPYFIKLLVFNKIK  
KSLFGNSIRFCVGGGAFLDIKQQQFAALGVPLYQGYGLTEAAPISSNTPRVHKFGTSG  
IMAPSVQCKIMDENGAEVVSQGTMGHITVTGENVMLGYYKNSEATAEVLTDGRLWTGDLGY  
MDEEGFLSVIGRAKALLIREDGEKYSPEEIEEAITMSTDVFDQLMVWCDHKKYTMALVTL  
DETKVKNLITRKSIIHSAEALLAVLIEEFYRFKNDPKAKKVQSAWVPSVFQILEEPFSEQN  
GTINSTMKLVHRHKVAEVYKEYIEYSYVSEGSSTINKKNLALVAKKFSLK\*

>SPBDM4\_v1\_40765|ID:27158070| transposase (fragment) [Uncultured spirochete bdmA 4]  
MNQDGSQEKIIRIDEVQVKRELNDIVRSTVEEPVKNLLDAEAEDELCGVGRYEQNPRIDT  
RAGSCQRNLDTQNIKMYLLASFRM\*

>SPBDM4\_v1\_40766|ID:27158071| Carbohydrate kinase [Uncultured spirochete bdmA 4]  
MKDESQFSDLYACIDLGTQSVRVIIDEHGTLVACAEHEYPISYPNDGWAEQKPEDWYKN  
FLLAWESALKDISPPRRKCIKALCACATSSTVFPVDAEGRPLSNALVWMDSRVKEAEDI  
NATGNPTLSHCGGEVSVVEWLIPKVLWFKHNKKEIYDTAYRFVEQLDWFNWMLSGEWCSSE  
CNATCKANYSHDDGGWNPHYFGNIGLDDYKEKIITQVTPVGGGLIGELRADFCETYGLNKS  
VSLYQGGIDAYIAVLGLGVVHEGILGAILGTSFVELCMTSNPLKIEGIWGPYKDAIIEGY  
YTLEGGQISAGSITKWFREIFGNGKSIDFKSISSEAKNSGVGAHGLVALDFFQGNRTPYK  
NPKSRGVIWGLSLSHSRGDIYRALIESVAFGTRNIISNFNLFYDISSIVACGGVTKDEL  
WMSVIADACDMQISLVNSSSYAGLMGCAMISAVSSGLFRDYVSAANSMIHEVAVVEPNHK  
NKELYESAYDQYIALCGIMNSMSTSKK\*

>SPBDM4\_v1\_40767|ID:27158072| Short-chain dehydrogenase/reductase SDR [Uncultured spirochete bdmA 4]  
MRERFDGKVGIIITGSARGMGKEAAKMLASEGCAVVITDIDKTELEKTLLLEFTNLGYKVK  
FQCDVSKVEQIEKLIIFTYEQYKHIDILINAGILVSATIEETTNEIIDRTLINIKGVL  
YTIRAITPIMKAQKYGRIINVASITGKNGDNTTTFAYGASKGAVISLTRSVARQLGPYGI  
TCNAIAPHAVMTTMSYWSEKKKASMAKNIPVRRRLGNEKDMAALMCYLASDEASFINGET  
VNINGGYMD\*

>SPBDM4\_v1\_40768|ID:27158073|deocC| Deoxyribose-phosphate aldolase [Uncultured spirochete bdmA 4]  
MDQNQIIQKIVEEVLSRMNSSTANSAPGGGASPAASAGGVAKTATPEDILLPSDLPKYID  
HTLLKPEASEEQIDALCDEAAKYHFYSVCVNSSWVEHCVRRLGGTGVKTCVVGFPPLGAM  
DRRAKSFEARTAVSNGADEIDMVMNVGAMKANDIKTVREDMLAVRRACRQGIIKLVIIEA  
CLLTDEEKVLACQIAKDIGADVFVKTSTGFGKGGATVADV ALMRRTVGPKMVGKAAGGIKS  
FEDAIQMLKAGATRLGTSSGIALVSGQKASSNY\*

>SPBDM4\_v1\_40769|ID:27158074|yw1F| putative sugar phosphate isomerase Yw1F [Uncultured spirochete bdmA 4]  
VSNESIEGPVDLVHSAIGSDHGAVAQKEMLAKEYLELLGYRVVNVGCFGTDKVDYPDIAE  
AVCRKVVSIGDCERGI VLDGAGIGSCMAANKIKGIRAAMCYNLRTVVNSREHNNANVLTG  
GPLHTPDELAEMVRVWLETRFAGGRHIVRINKIMALERGGSSN\*

>SPBDM4\_v1\_40770|ID:27158075| conserved protein of unknown function [Uncultured spirochete bdmA 4]  
MIVGRVVANVVSTKHPQYVGYKLLMVQPLDAAGQPKGKPLLALDGVQAGIGDVLVVDE  
GGSARVMGDEKALTIRTAICGIIDRIDIEVNT\*

>SPBDM4\_v1\_40771|ID:27158076| Ethanolamine utilization protein EutN/carboxysome structural protein CcmL  
[Uncultured spirochete bdmA 4]  
MKLGRVVGRVVSTKKMPCFDGLKLLL VQPLDHLKRNAGPVIVAFD TVKSGEGDLVFFESG  
KEAAQANPNGWFNPGDAAIIGIVDAVNTEEIR\*

>SPBDM4\_v1\_40772|ID:27158077|eutE| putative aldehyde dehydrogenase, ethanolamine utilization protein  
[Uncultured spirochete bdmA 4]

MNTNMANLTDDIRVVVEEVLKSPDIKALLSGNTPADDAVPEQSGIFPDVDSAVAAATIAQ  
RELIALPLDTRKAIIEAIRRVVLWNNRDLSSQAVAETGMGNLADKQIKNALAANKTPGVE  
DIEPRVCTDEHGLTTELAPWGVIGAVTPVTNPIATITCNAIGMIAAGNSVVFNVHPNAK  
KISCRLVSMFNDAIHMEGGPRNLLCAIGEPTIESANILMKHKGIALLVVTGGPGVVKAAM  
GSGKKAICAGPGNPPCVVDSTADIVKAGRDIVLGASFDNNVVCICEKEVLAVASIADRLK  
GEMRKNAGAFELTGAQIDAVTKLVIAEPGGADHEGAPNKAYVGKSPIEIARAAGIAPPET



RLLLMEVGREHPLVWTEQLMPVLPLVRMNDVDEAIDFAVVVERGCRHSAMIHSHDIEKLS  
RMAKVMNCSLFIKNGPCYAGLGQGGAGYTSFTIASPTGEGITRPRSFTREERRCTLVDSFR  
II\*

>SPBDM4\_v1\_40773|ID:27158078| Ethanolamine utilization protein EutN/carboxysome structural protein CcmI [Uncultured spirochete bdmA 4]

MNLARVRGTVVATKRSDAVASPRFLLVEECNERGEGRGEYLVALDMVGAERGHLLVLLTQG  
SSCRWTYATDDKPIDTLVVAIVDQMDEGGVDVWKQE\*

>SPBDM4\_v1\_40774|ID:27158079|ccmL| Carbon dioxide concentrating mechanism protein CcmL [Uncultured spirochete bdmA 4]

MVLARVRGTVVSTQKPQNMEGLRLLLLLEKIDPVSLQGGKDFVVGIDSVGANAGEIVFFVT  
GSSARMTEETTKGKPSDATIIAIVDTIEKDGTFYRKA VEQE\*

>SPBDM4\_v1\_40775|ID:27158080|cchA| putative carboxysome-like ethanolaminosome structural protein, ethanolamine utilization protein [Uncultured spirochete bdmA 4]

MADTNDALGMIETRGAAMVEAADAMVKA AKVDLIGYEKIGGGYVTAIVRGDVAACRAAV  
DAGQRS AEKVGEVVSTHVIPR PHEAVDAALPLGRKPANPSNKKLASSAK\*

>SPBDM4\_v1\_40776|ID:27158081| conserved protein of unknown function [Uncultured spirochete bdmA 4]

MAVDLRTYVFLDSLQNASFIATISKGYYPIGMQACCIIEIAPGIEINRLTDIALKATN  
VTPGLQIVERAYGLLEVHSDSQGDARMAGEAVLRELGMTEENRIKPRVMTSQLIKNISDH  
HAQLINKVRHGNMVLRGDTLYVLEVEPAGYAYYAANEA EKTS DINIIEVVGFGAFGRVYI  
AGDEAEVIEARKVVEARLDGLGGRVLAANAARI\*

>SPBDM4\_v1\_40777|ID:27158082|cchA| putative carboxysome-like ethanolaminosome structural protein, ethanolamine utilization protein [Uncultured spirochete bdmA 4]

MAEKTNDALGMIETRGAAMVEAADAMVKA AKVDLIGYEKIGGGYVTAIVRGDVAACRAA  
VDAGVKS AEKVGEVVSTHVIPR PHASVDEALPLGRNGVEA\*

>SPBDM4\_v1\_40778|ID:27158083| putative Transcriptional regulator LsrR [Uncultured spirochete bdmA 4]

MAERGSRKIISRTDDSEFDLITRIAWMYEKEKLTQAEIAEKIFLSRQKVQRYLEKARDLE  
VIQFNLKHPRVNLLGIEDELRRKFKGLKDAVVVPSPTNAEGLRKS FAMAGAHYLERRLAG  
AGNCTLGLGWGNTTAYLADYFEPQNVEEKVNVVSLIGNLMLNVSMNPFLMGQKIAEK LDA  
PFYNIWAPAAIQT KERADIFKSEPWIHDVLDIASKADINLISIGEVSRSASL FQMGYLSG  
ADLKRLTDKDAVGDILSRFFDSEG TIEDEIHDRVIGIPLDALCDERKLCIGIAGGPSKT  
QAIAAAIHQKYINVIITDENTATELLR\*

>SPBDM4\_v1\_40779|ID:27158084| transposase [Uncultured spirochete bdmA 4]

VKGYKRITNKDREEIAVYYGRGETQEATAEKLGVSSAISRELKRGTD RGSYNPFLA QRE  
SQHQAICRRPMLKINAQTWKIIEHHLALHWSSYQIAAFLRQNVNDGTEVIVSEKTIYHYL  
HFPMKGELQKLALQELRQKGKKRKKKGEETRGLANIKFIDERQEEVNTRIVPGHWEGDL  
IIGKDHKSALS VIVERQTRYGLIDRL ENYTAPEVRKSLEKRLKTLKPELVKSIPYDQGKE  
IAEHEMLARKIRMRVYFCHPHSPMVKSLDFWN\*

>SPBDM4\_v1\_40780|ID:27158085| protein of unknown function [Uncultured spirochete bdmA 4]

MTLLYFAGHTIWIYINTDNIVALMDKFTHPLFYFMQQAARNYTWRD\*

>SPBDM4\_v1\_40781|ID:27158086| putative D-ribose ABC transporter permease protein [Uncultured spirochete bdmA 4]

MKKRLLTAFFLLIVVVLASAQSKPLIGFSHVSMNPNPYLAMEKAAKETAAARGADIIVLN  
AEEDISKQISDIESLLVKGVKGLIVNSTTEYGTMPVIKKAKAMGIPVVAIDRLLYGDYLA  
YVGIDQWKAGELQGEYITKKLLPKGGNIVMIIGDPGDSASIGRGNMLSILEKPENKGGY  
NILGTYKASYNQMLGMQKMEEAIASFGNKIDL VYCANDSMALGAEAA LANAKMDKVMICG  
IDGQKEAYAEILKGGPYKSTVINNSWEITQKAVNILMDYITKKIEPEDKQVITGTILVTA  
DNVKTYYNKDSVF\*

>SPBDM4\_v1\_40782|ID:27158087|rbsC| Ribose transport system permease protein RbsC [Uncultured spirochete bdmA 4]

MKPKMSNFISDYGLFFILVVLVIMSALLSPLFFTYANLANFFTQVA YNGLLAIGMTFVIL  
TGGIDLSVGSIVGFSSILYATLMHGSFFTFMPNQIFMYNGSPVLT PILPFPMDIIFVLA I  
GALIGFLNGAISYKFRINSFIVTLCMMIFIRGLAVCYTNGQPLFGVPDAVS YLAYGV PFK  
IPMPTIIWLLTGAIATILLRYTRFRGRIYAVGGDEEVARLSGIQPPKYRIFPYVVS GFLA  
ALVGIIMS GRMGCGDPKIADGWQTDAIAAVVIGGASMSGGKGSIGGTILGVLLGLITNV

MNLLEIDAYPQQMAKGIIIAALALQGTLSARKGK\*

>SPBDM4\_v1\_40783|ID:27158088|mgIA| fused methyl-galactoside transporter subunits of ABC superfamily: ATP-binding components [Uncultured spirochete bdmA 4]

MSNSSVLLLEVKGVTKVYPGVRALDNVDFQVRRGEVHCLAGENGAGKSTLIEIIGGSYPKD  
SGSIQIEGKEVVFENPRHAQKCGIVVLHQELPILKDLSSVAENIFLGRQPRNFGFVDYRE  
MNRQAKRWLDMIQANIDPRALLGRLPVSKQQLVSIKAKISLHAQVIIFDEPSAVLTTAEL  
ERLFQIISSFKSEGRGIVYISHRLEEIFEIGDRVTVLRNGKLIGSEPIAQLSRESLVKML  
VGHVDVSEEYIGSRQVSHNSEPSLVVCKLSRQGILTDINLRIARGEIFGIYGLVGSGRTEL  
ARAIIGADPIDSGDMFLDGKRIKNHSPQEAIQNGFCLIPEDRKNQGVLLLEKSIADNIALP  
ALPRLKSSFLVDAKKVSNYASEYMDKLVVAPNARQYVKFLSGGNQKQVVLARWIGMKLD  
VFIFDEPTRGIDVGAKKEIRNLIRSAEEDKIVIFISSEISEILSIADRIGVMHEGRLVT  
VVDNRKNATREKLISYSMGAKEP\*

>SPBDM4\_v1\_40784|ID:27158089|rbsC| Ribose transport system permease protein RbsC [Uncultured spirochete bdmA 4]

MKDYMKRLNQQGGLSNIFRYGVLVILVIVASILAPGFLSMQNVLNLLRNFSFLGFISIGM  
TFVIISGGLDLSVASTFALSGVLLGLFQHWGIYLGHVDAKLSLLAPTPVLFIIILAIGAFI  
GFLNGFIITRLKVADFAATLGTMIQVVRGLAFAVSGGRTIFNLDPIALYMGRGMIGPIPFV  
AILFILAIICAIVLRKTVFGKRLYACGENAVAARLSGINPDHYKTIAYMISGFFAALAG  
ICMAGRLNVGEPVAEGWELDAIAAVVIGGTSFAGGNGGVGKTLGTVIIAMIRNILSLI  
GILPDPQEMIMGLVLLAAVVFGLGTEKGVKRA\*

>SPBDM4\_v1\_40785|ID:27158090| transposase [Uncultured spirochete bdmA 4]

MAQVKQFDKRSRGTIVYVESKAYWDKEKHQSRCTRITLIGRFAPDTGEVIATDGRGRKRKAA  
EPDIKPTSGPISVTRTRRLFYGATSLLDQIGETVGITADLKQCFPDNYKNILSIAFYFLIL  
EEHSSLMRFSKWAALHRHPYGKDIPSQRSELFSITEEQKMKFFRLQGSRRAKDEFWAY  
DSTSISYSEHLKQVKWGKNKEYEPLAQINLVLLFGETSNLPHYRKLKLAGNIPDVKTVE  
LVRELNILGYRNIKLVMDRGFYSAENINALYKTHYKFIQACGTSLSYARNCIKKEAEEMR  
RLANYNEKYCLYMHSETISWDYTQERPYPKGDITGDRMYLHLYYNPEKAVEDEMNLNRG  
MLELQRELLTGQRNPDHEKDYAKYFEVTQTPVRGVRVKPIQEAMESAKERYGYFVLISNE  
IKDPVMALELYRNRDVAEKAFGNIKERLNGRRTLVASDASLEGKLFVEFVALIYLAYIKK  
KMQEKGLYATYTLQGLLDELVDIECFTEPGKAPIVGEILKKQKQIYIDMGVSVPLNPASL  
C\*

>SPBDM4\_v1\_40786|ID:27158091| ABC transporter transmembrane region (fragment) [Uncultured spirochete bdmA 4]

MPLMQFCLYGSMLLLSWFGAKEILASNNNPVTGLSTGELASLITYAMQILMSLMMLSMVF  
VMIIISHASAERIVEILNEESDLKNRENVPYAVEDGSITFENVTFSTYQKADKPVLDGIT  
LSIESGETVGILGGTSSKSSLVQLIPRLYDAVSGKVS VGGVDVRDYDIESLRNQVAMVL  
QKNVLFSGTIKENLRWGNENATDEEMIHACELAQADGFIREFPNQYDTYIEQGGTAVSGG  
QKQRLCIARALLKPKILILDDSTSAVDTRTDTLIRQAFQKDIPNTTKIIIAQRVASVQD  
ADKIVVLDGKIDAVGTHAELLQTCTIYREVYESQNKGGVLHE\*

>SPBDM4\_v1\_40787|ID:27158092| putative ABC transporter permease/ATP-binding protein [Uncultured spirochete bdmA 4]

MSKILPKGDPKLFKGGGRPPMQRFKPGTIKRLFSYMVEYKIQILIFVVCILISAATGAA  
SSLFLRALIDNYIVPLLGQAHPVFTELFKAILLMGMIYVVGVLATLTFYNRTMVVIGQGTL  
KKIRDRMFTHMQSLPIRYFDTHTHGDVMSRYTNDTDLRQAIAQSLPQMFSLSVSVAAF  
FAMLYLSVGLTALVVLFAFVLLKVVRFLVGRSGAFFVKQQRALGDVNGYIEETINGQKV  
KVFCHEGKAEEEFDKKNDELCCYCATKANTYGNVTMPIVGNMGYMLYVFLAIIIGGAAGITG  
VPNLSLTGVHALTIGTIVSFLTLRSFINPIGQISMQFNMMVMALAGASRIFELMDEKSE  
QDSGYVTLVNAKMENGEIRECSERTETWAWKHPHGDGTLTYTPLRGDIRFFDVDFAYEGN  
KTVLHNITLYAEPGQKVAFVGATGAGKTTITNLINRFYDIADGEIRYDGININKIKKADL  
RRSLGMVLQDVNLFTGTVMNIRYGKLDATDEECIEAAKLANADGFIRMLPQGYNTVLKG  
DGS\*

>SPBDM4\_v1\_40788|ID:27158093| protein of unknown function [Uncultured spirochete bdmA 4]

LISIAAAVADPPVMIMDEATSSIDTRTEAIVQKGM DALMKGRVTFVIAHRLSTVQNADD  
IMVLEDGRIERGSHAQLISQMKGYYQLYTGAFELE\*

>SPBDM4\_v1\_40789|ID:27158094| putative Xaa-Pro dipeptidase [Uncultured spirochete bdmA 4]  
MLLNRPRLTSLMKKAGIPALISAKPENAIYLTSYHPMGSRTIRDRLTYVLYFADEHKAPL  
ALCPSIDIRQMRELSWFPGDRIMPFVEFKTGKDQGLVTDKFGFLAEQIRNAEYDTDEIGI  
ETSFLPETILNGFREALPNAKFVNSDPIIKRARA AKTPEEIERLRKACKATQEGCKKLIE  
HASRLSYEDDAAAAARAESMMRGAETIGFCAVGSLSRANVHNNRHEPITEGVSVFRFDY  
GAIYEGYWGDLARTFVVGKPNREQQKYHDAVRAAQEAGLRAVKAGVTADYVYREALRAGQ  
AYDPELRRHVGHGLGLEVHEEPLLRGNEQVIEAGMVMCVEVGKYISDLGGFQIEDTVL  
VTESGIEIMDSLPKDISIAIQ\*

>SPBDM4\_v1\_40790|ID:27158095| conserved membrane protein of unknown function [Uncultured spirochete bdmA 4]

MAHKMSDIMDDVKTSGKRKLS PAMSKIAFALGICYAAFNLTHLLIHSFGPWVHLPVNLCF  
ASILTLTCYNLFEKRRKLAVAVDILLILMAISSTLYAIEYQEMIFRQGSSTIPDMVF  
ATCIIVSFEITRRASGVALSIVASVFLLYALFGKYIPGYLGHSYERVMAYLYSDVG  
IFGSALSAASSYVFLFILFGSFLKLGGGQVFIDLATGVAGHKRGGPAKVAVMASALFGT  
ISGSSVANVAATGTFTIPMMKLGYPHFAGAVEAASSTGGQIMPPVMGSTAFILAEIVG  
VTYSTLALKAVVPAVLYFLAVFIMVDLEAVR TKLVGVPKDQLPNAGKIMREKWAFFLPV  
VIFFTLLVLKTSTSRAAVLGIAATFIGPIFFSKGTKLSAKKVCDSVHGGSMGVLNIIAAC  
TSAGVIIGVLAMTGLGLKIGTLLVKLSQGNTFFMLIAAMVLTILGMGLPTAAAYIIAAS  
VVGPAQTQAGIPMLTAHLFILYFAVTAMVTPVALASYTAAGIAGCSASKVGWSGLKLSI  
AGFIVPFMFVYGPGLLEGSIFNILYSILCSLIGIALLA VASEGYAYFIGNLNVPQRFII  
SAASICIMLPGFMTDAVGIAAAVVAFLWKYTANRMHNKNVQNPI\*

>SPBDM4\_v1\_40791|ID:27158096| putative 31 kDa immunogenic protein [Uncultured spirochete bdmA 4]

MKAIKVTAALMLFGLVAVSTLAAAPSWNF SIGTSTLGGSFYIMGTPFAKVITEKVPNVIA  
TVQATNGPSANIQLMERGEMKLA YVSSAAAYEGWNGLSWAKGVKYQRMRTMFTTYSSYFE  
MVTLSKLPIKTIRDLAGKRVHMSMPNGTPDIAMRYCLELLNIVPKDKLYMQTEQALDQLK  
DGKLDVVIFAMGLPTSMILD LQATHDIRMVDISPEDLNTVASQYPYFAKAVIPAGTYENM  
PKDINTFAFWNYSVCDKDL PDDL VYQMTKAVFENKKDFEAASSY GKELFAKNIVNAV VPL  
HPGAVKYYKEIGIDIPQNL PPTD\*

>SPBDM4\_v1\_40792|ID:27158097| conserved protein of unknown function [Uncultured spirochete bdmA 4]

VAKIVA EYIDRLINIEMRQTGGIPRGVTHRLYEAARKFHKEPLTYLAASKLIEAVGPKDH  
VLIATGAGVAPWLPKGETDGPLGAAALARAI DLGLGGKPVLVGEGRCLPPIAATVEAASL  
LVADDDLFAQRDHVAQVLEYPLGEKDGSLFAELLEKYKPKAIITVEKHGPSASGKYHSI  
MGVGRSPDNVANVKFLVEAMEKGILTIGIGDGGNEIGFGNIHEDVRKI QKYGSKCQCPC  
GAGIATVTKADVLVAAISNWGAYGIAAML AFLMKNPRL LHDKDTEYRMLEASIRAGAMD  
GLYTNL SMYVDGTSCETQLSMITMLHEIV ANGLSEQPRHW\*

>SPBDM4\_v1\_40793|ID:27158098| putative Endoribonuclease L-PSP [Uncultured spirochete bdmA 4]

MEYKRRLKSAIMKKQEIVCDGIAKSANPLSQGLKFGNLVFLSGQLGRNPDTGKLENGVYN  
QTVRVL SNLKS LLETEGLSMRDILKTTIFMADISKVAEMNKAYGEFFAAPPTRSCIEVS  
ALGGGAEVEIEVIAGK\*

>SPBDM4\_v1\_40794|ID:27158099| YheO domain protein [Uncultured spirochete bdmA 4]

MGGYMSNDSNAIILETLVTIARGIANTFGPSSEVVVHDL SKPKTSVIAVFNNTVTGRKVG  
EGIRDLILTVLRSPDFKDDMLVNYQSVTPKGKNIKCTTIVIRNNEKDVVGALCINTDL SA  
FVATKKFFDDFTKTHNLTPPEDKVVNVKNADVLDILDHLIQSTIKETGKLVEQMSKEDKA  
QVIKYLDEKGTFLVRGSVNWVAKKLGMSRNTVYSYLEQHRLSKNIK\*

>SPBDM4\_v1\_40795|ID:27158100| putative Transcriptional regulator, DeoR family [Uncultured spirochete bdmA 4]

MAINQKEIDLAYRCADLYHNHDASEFEISQKLDISRPKVSRLALARDLGIITISIKPPE  
LFNQIELERSLTAQYHLQNVLIGIPKDNTDASIQSAIASRFLEAFQNLKPDIRIGIGVG  
STIYATSRMLRLNGPVPPRISLFPLMGLAGRTDPAYQVNNIIDLFAEPLGANRNYLMAPA  
IFENTVQKDVFYKSQQVFEIVSMWEKLDVA VFGIGGPIERSAILFSSFPEKYL VQFVQSH  
AVGDILAHFFDLEGKLVCPAEAVLLSISFSALKAI PQRISLAGGLWKLNSIKTALRSNL  
ITILVTDLLTAQNLVE\*

>SPBDM4\_v1\_40796|ID:27158101| putative Alcohol dehydrogenase GroES domain protein [Uncultured spirochete bdmA 4]

MKAVMYEAPRVVSFRDVPEPSFDSNTILINISYSFICATDIKTYKQGHPHIIPPTILGHE

FTGVIERVGENVEGYAVGDCVTASPYINCGTCDSCIRGRPEVCSSSRKFPSNGAFAERIAV  
SSDYAKLGLIKVPKVLLKQAALSEPLACVLNSASSFNPKPAENILVVGAGFMGVLNALT  
KTIFGAHAFITDTNHDRLRLPKKLGIEVIEDIGEMHKKFDAILAVPIPELIMQYESHIV  
PFGHLVLFGGYAKETKAVFDPNLVHYMGITIVGTSGCSAVNFQTATKIIMNGTLKMDEFT  
NEMYKFSSSDFFQTAQDAMEGRVLKAGFIL\*

>SPBDM4\_v1\_40797|ID:27158102|lsrF| Uncharacterized aldolase LsrF [Uncultured spirochete bdmA 4]

MSFGKEVRMSRIFRGKNNMTVMLALDHGMALGPMRGIERPRELLNSVSGSVDSIMLNKGI  
LVQCASPSSGAGIVLRISGAATIDGPDLTAEERLTTTIEEALRLGVDAVATSIFVGT  
PNEH  
ASIEACALLSDECDFRGMPLLAVTALGKDREKAFKSRYLALAVRVAEELGADI  
IKTYCYCE  
DGFDKVVEAAVGIPVVIAGGPLMDSTSQVLEVAEKAIKIGARGVDMGRNVWQSEKPI  
AML  
KSLRDIIHEGVTAQEALLRYWN\*

>SPBDM4\_v1\_40798|ID:27158103| putative ribose/galactose/methyl galactoside import ATP-binding protein [Uncultured spirochete bdmA 4]

MQEEIVRIESVSKDFPGVAALCNINLSLKTGEIHGVVGENGAGKSTLINILAGVYPTSG  
SLFINGEKVNSFHPSFAQSLGIAVVYQETVLVPDFTAENIWLGRESSKYAVLDKNEQKK  
RTKLLCKEYGINIPLSLPVSSFRVAEQKLVEILRALSMKSKVFIFDEPTEALSQQDVEKL  
FKILSTLKS LGFAILYVSHHLEEVFRICDRITILRN GEEVGCYLPNELSTQSLIQLITNR  
DMKDQYPVPPKDVKMNPLLQVENLSNPVLGLLNISFHINTGEVVAFFGMVGS  
HRSELMKC  
LFGAARTKSGNII FNGQKIRFHHPQDAIKVGI  
FLCPEDRKTEGLIADMSVLDNCSLPFLS  
HFSRIGIVRKALQKDKVKKLILDLSIKTPSVN  
QKATFLSGGNQQKIVLGKWLIGNKGGKLF  
IFDEPTK  
GIDVGT  
KMDIYKTMQNLAREGAGVIFVSSDIRELLGVSDRLYVMRKG  
GGIAGEY  
ERKDFDQQTILLKALTEEKT  
VGVSS\*

>SPBDM4\_v1\_40799|ID:27158104|rbsC| Ribose transport system permease protein RbsC [Uncultured spirochete bdmA 4]

MKQEIKNITQKYGTILTLIILIVFSIATSTFLEVRNLLNILAHIAMLMIASGLTVCMV  
PGDFDMSIGSIASLAGILFTSLVLKKVPMFPSIVMVIIMGAVFGLLAGFLVTKVRVSAFI  
ATLALGQIATGITFMYTRGQAVFGDFNSSFLFLGQGRVFKVIPTQVIIMLIITCALSFFM  
EKTKAGKMYAIGGSIRASYLSGIKVNLRIIGLMISGSLAAFTGCILASRLGSGQPTAG  
DSYLMDSIAAA YIGMTTIKVS  
RPNIPGTLIGVLFIGIIDNGLTLIGVS  
YFFQYIAKGAI  
ILAVALSSRGSTVVEK\*

>SPBDM4\_v1\_40800|ID:27158105| putative ABC-type sugar transport system periplasmic component-like protein [Uncultured spirochete bdmA 4]

MKRFFVFLALAMVTFTTGAQQLTIGFVSPDQGASTQARVANKLEQVAKREGWKISSA  
TGSWEKMANIVEDYVSKKVSIVIAMGQVNSLTPALQAAVKANIPVIAIDSEYTDLLTAD  
ILTNNWEMGAKISTY MVDRLNHKGNII  
VFKFDQFYGTRYRGEILD  
TILSEEPDIKVL  
DTH  
FVPPTGFVEDAQSAMQAYLVKYGSKIDAVW  
CAYDDLAYGVSLAVKEKGF  
GPDDIFVVGID  
GTDRNRLRIKSGTSPVVG  
TIIQPYDDAVEKAADLIKKLIIQK  
KSAKEVVGSVKVIYMSTP  
LITSANVDDYLK\*

>SPBDM4\_v1\_40801|ID:27158106| Pentulose/hexulose kinase [Uncultured spirochete bdmA 4]

MILGVDIGTASSKAVLIDNRLNIVSEERIQHSIEYVKPGFVEQDPEIWWADVCQLTKSLS  
KKEYLSKVKA VGISSMGPTVLPVSSSGEALRHSILY  
GIDTRAFKEIAELNDSLGS  
DVLK  
TYSRFSSQSILPKLLWIKNNQSDIFKNTHSILAANGYIVFKLTGKSSLDYFTASSGGIID  
FLTNSLYRQSFLASRIDENIIPKLYWPGEIVGNITPEASKMTGLPIGIPVIAGTTDAAAE  
AVISGCVEAGDS AISL  
GSTYIYVTCRNNANIKNV  
VSNFLSPHSYILGGATGSGGILVE  
WFAKNFLNSDPSRLS  
FSLPEKDFKKTSLIALPYLNGARTPVNDQ  
NARGLILGLGTETKLA  
DIYMALIESL ALEIDMIVSEISQRNKANG  
KLRITGGGSTNEILLQAI  
AEVLK  
KDLEILPA  
NMSSAAGAAVL  
AGIATKEMSME  
EATKLVPIEKRVKYTGSYDEYFKKKKEIFG  
KAYSANKE  
LFIDLGMVKE\*

>SPBDM4\_v1\_40802|ID:27158107|buk| putative butyrate kinase [Uncultured spirochete bdmA 4]

MKKILAINPGGTSTKIAIFDGD TLLYQKQIQHKMEDLIQYKHVIEQFEYRYTLV  
LSSLHE  
SLTDMSSLN AVVARGGMLYSIESGTYSVNDIMINDL  
KAAKRGEHASNLGAMLAYKI  
ANDL  
GIPSFIVDPVSVDEFEDVARVSGL  
KELPRVSLSHALNSKAIARKA  
ADA  
KGGKSYELSNII  
V  
AHLGTGISVSAHKNR  
MIDVNNAQEEGPFSSDRCGTVPSYRLVK  
MCFSGLYTENQLL  
KML  
EGSGGLNSLVGMKDIREIELQANAGNADADLALRALTYQIAKEIGAIATV  
LNGKVDCIAL

TGGMVYSDRIVNDITRRVEFISNVLLFPGEQEMTSLASGALRVLNGEEAAKNYRGAAQC\*  
>SPBDM4\_v1\_40803|ID:27158108| protein of unknown function [Uncultured spirochete bdmA 4]  
LPFSMETHYCIKNKFNKWKI\*  
>SPBDM4\_v1\_40804|ID:27158109|ptb| Phosphate butyryltransferase [Uncultured spirochete bdmA 4]  
MLKNFNDVIEKLRNIGHTIALAAEDSESEIAIQKVASLADV KAILVGNSDKIIALCGP  
KSLPENFKIINEPSSPAAALRAASLVRTGEADILMKGLVNTSDFLRAVLNPEQGLRTGHL  
ISHLAAFEVPGESKLMFHS DGGMVVSPGLEEKKAISNALDSLHCLGIQKPNIAILAANE  
RVDKIPATTDAREIVDAWKRGFPCVIEGPIAMDVAASEEAAKHKGISSIVGNVDLF  
IFPSIESGNIAGKILVHYAKAKMAGIILGAAKPIVLASRSDNSLTKVDSIALACLASRKS  
\*  
>SPBDM4\_v1\_40805|ID:27158110| Mpv17/PMP22 [Uncultured spirochete bdmA 4]  
MKKGDLVWGIALVAFISLFIFPSTASVLFKVTDKHPYIMGFSKFSVFATMGELLYRMAK  
GSWKIFTGFLFKALVWGIIGMLTVLMFNLYSSGVKTVA AAGLLPVGKGILKSFLLA FWTS  
AIMNLTFSVPFMAVHRIVDVIIKKMNKVAIHLSEIIQEINWEYFASFILGKTIPFFWIP  
AHTVAFLLPSDYRVLFAALLSILGILSWGERKA\*  
>SPBDM4\_v1\_40806|ID:27158111| transposase [Uncultured spirochete bdmA 4]  
MNVRRCTLKNKAGGTFTYLQLVHNYRVKETGKTKTNVLMKLGREDQIEPSYVQSIKALS  
AVIGESPSEAVTGFEFHASRELGGTWLLDALWNRLGIGKAIKALLKERQFDIPVERLLFA  
MVAGRILAPGSKLSLEHWVSRKAYINDLPEVDVHNL YRAMDLLIASNEELQKQVFTEVAK  
NASLDDLIFLDTTNTYFETDEDTSDSGLLKRGHSGDGHPELPLVSIAFAVTKSGPIRC  
WVFPGNTSDQ TIVEQVKHDLGQWNLGHLVMVRDAGFNSADNRRILLRECGDYIIGEKLRV  
GTDGAAVEALHRKGRFKILENGLAIKDVILDAGTATERRFIIVKNPEAETRDRVIREQIV  
EATKRKLEELSQYTGKAHTKAACALRSHSAYGRYIKQDEKGVLRIDTAKIASESLLDGKF  
LVSTSSMKMDAADVVAGYKQLWAIERVFRDMKNILDIRPIYHHLDDRIRSHILICWLAMV  
LVRHAENIADKSWYQIETALADITAGLIESENMSLWYCSDISDEAVDIFKRLNIALPKKV  
LSTVEREAAAV\*  
>SPBDM4\_v1\_40807|ID:27158112| transposase [Uncultured spirochete bdmA 4]  
MKATTAKQPGYQTVHIVRGVHYIYECVSTYDKEKKQSFNKQVCIGKKGPDGGSFIPNAYYR  
ELHQLATTGEKITVSSKVIGATETLTQVANTEGLERCLTSLGKQLGSQALALAEYILVR  
GSALSHFPEWAAHQKLPQGAEVLSSQDISRFLGTISDDMMMEKFFTRWASNFSGHDTICLD  
LTSIGSYSECNELVKYGYNRDREQLEQVNILGLFSASKMLPVAVRMLPGNIADVSTLVNE  
LTHFSYLGLSNPVLMDKGF DSEENLTRLLDRRLKFIMMAHCNRSWLKELEEQRHDSMRV  
PSKLFHYQDDRYAVTELLSLGSEKNRRCYAHIIYCSRLAEKRLDRFNERLHDYYDRLVA  
GGLETIPVDYQKYFSIKETPKRRRSVILDEAAAVATEKSFNVMFVILSNTEKDAHTALR  
LYRERDAVEKFFDDMKNSMDMDRLRVHTSPRAKARLFLQYLSTILLYLCRNKLG FYESSN  
TSVRGILEDLSGICEVTHSNHYGSIITESTSAQRATLAQLGIDTSSWLQK\*  
>SPBDM4\_v1\_40808|ID:27158113| transposase (fragment) [Uncultured spirochete bdmA 4]  
LDKLPTALQEKA KGM LHDQYLAPTREEALKA FALFVESFGAKYPKAVECLVKDKDDLFAF  
YDFPAMHRIHLRTTNPIESTFATVRVRHRKTKGNGTRKATLAMVYKLCREAEQRWRKLDG  
SKLIPLVEAGIKFVNGEWVDEAVA\*  
>SPBDM4\_v1\_40809|ID:27158114| protein of unknown function [Uncultured spirochete bdmA 4]  
VYCNARLEDE RSCLLVVMGADSFNGKELLA VSDGYRERTQSWKEILLDL\*  
>SPBDM4\_v1\_40810|ID:27158115| protein of unknown function [Uncultured spirochete bdmA 4]  
VSKTIIETRIEATPETMGALEIIVREGARKMLQAALAEIEEHL SRFKNLVDEEGKRLVV  
RNGVMPERTVLTGAGPIPTRPRVDDRALDARGEQRFTSRIHPPFMRRAPSIDTLVPVLY  
LKGISDRRLSDGAGGDPWPPGERTFGEHRRAP EGDMDRGIRGVIETGSLGETLCLRLGRW  
RVLQRPSRG\*  
>SPBDM4\_v1\_40811|ID:27158116| transposase (fragment) [Uncultured spirochete bdmA 4]  
MSKRYDKEFKAKVAVEAVKGEKTIQEIAMRYQVYPNEI\*  
>SPBDM4\_v1\_40812|ID:27158117| protein of unknown function [Uncultured spirochete bdmA 4]  
MSLNLFKIKQKLI AEGQRF AVATIAAESSSLINGAFPVPQIGSKIILTADGQVFGTTGND  
TLDEEV MRKLRECLHNREDNSISITQSLKIFIERVEPAPALVIIGASEIGLAIKLAANL  
DFSIIIVDERADLANKQRFPMADSI VCESDLLKALSLISFDESCYVVIVFQANDDRAVRY  
CLNKPWAYCGMLGSKNRIGAVWEKLR RDGAPEARLKA VHAPIGFDIGAQSPEEIAIATLA

EVLA VKNKKS\*

>SPBDM4\_v1\_40813|ID:27158118| Ribose-phosphate pyrophosphokinase [Uncultured spirochete bdmA 4]  
MSYSDP THLGIIACPGA EVFANQVIRKLAGIYKHRFARKAQAIAGRYHISPELVIRKINF  
ANDCNTGMLFLAGD TDHYRPPQFKINVRHTFFANGEIKTEILESIRGRNIYIFQDIENHQ  
PVAFNDGTVHKVLSVNDHIFNLFVAIDAAMQAGAAEINLVLPYPSRQHKKKGREGLTA  
ARIGKMLES LGVNRITLDIHSKEIENAFDRLRMENLHASFQIIDKLMSIVDLAKEDMVV  
LAPDTGAIDRSKFYANALQKPLALLYKERDYSKVS RNAAETNISEMRL LGNVTKIVFMA  
DDMIGTGGT LIQAMKYLKELGATKVICAVSLPLFSGNAIEDFEAA YQEGLFYRIIGTNAI  
YHNELLKKEWYIQSDVTGLFAQVISLLHHRNSVSSLLDNRNVVARLIKRKLDITTNPKPQ  
ANAPQYPQGE GSPSNDDDIVPYGAADKQ\*

>SPBDM4\_v1\_40814|ID:27158119| conserved protein of unknown function [Uncultured spirochete bdmA 4]  
MSIATFGEIMLRLKSPGQERLFQSPLLEATFGGSEANVAVALSRLGIPARFISILPENQI  
GKECMREL RSHGVDVSGIKLKKGRIGIYFFENGANQRPSNVIYDRENSALS AISSE DINW  
AAAFEGLKWFHVSGITPALS KNCADETMRAVRTAKEKGLTVSFDLNYRAKLWNYGVEARI  
IMSEIAQYADILIGNEEDYQKSLGIEGPSAMGNGKIDIDAYRTMCERALRRYPKAKMAAV  
TLRESFSADSNDWSGMLVTRDQRFVSRKYHIANIVDRVGAGDSFSAGLIYGLFTLKDPGA  
ALEYAVALSCLKHSISGDFALIERGEVEKLLGGDSSGRVQR\*

>SPBDM4\_v1\_40815|ID:27158120| Putative KHG/KDPG aldolase [Includes: 4-hydroxy-2-oxoglutarate aldolase ; 2-  
dehydro-3-deoxy-phosphogluconate aldolase] (modular protein) [Uncultured spirochete bdmA 4]  
MKDLKELFYEAGLVPVIKIESVKMADGLANALCAGGLSVAEITFRTKAAPQVIEKIASFR  
KDITVGAGTVTTKEEVNAALSAGA QFIVSPGFNPSICEYCLERGVPVFPGVNPSLIEQA  
MSMGLTTLKFFPAEVSGGVKALNALKSVYQQVFSFIPTGGIQEDNIQEYLT LKNVLACGGS  
WIVSTELIEAGKFDEIERLIK SARRTMMGFLPIARGDEGSRASSGSSGEVKRDRGFIEVR  
TPSLKRTLAML SPLGASVIPGSEIMKGQSLIGASIDIPGIETHIRLIE\*

>SPBDM4\_v1\_40816|ID:27158121| conserved protein of unknown function [Uncultured spirochete bdmA 4]  
MIVSMLSELSRYRGLSRNLDVAFDWLNEGAWRQLSAGKYPIQDDDFALVQEYVTKEHSA  
CRFESHRYIDIQMLISGEEIEALS DSLKVVPEPYKSDIEFFALPEDKKAHALSMNPGQ  
IAIFFPEDAHRPCM KVGD SAESVKKIVVKVAV\*

>SPBDM4\_v1\_40817|ID:27158122|kduD| 2-deoxy-D-gluconate 3-dehydrogenase [Uncultured spirochete bdmA 4]  
MIFDKFKLNGKVAIVTGSSAGLGQAMCIALAEAGADIAGISHARSNETTREETIEKRGRFF  
LSITADLAQMESI QPIVSKAVEMFGHIDILVNNAGIIRREDSINFTEKDWDVMMNVNAKT  
LFFLSQAVARRFIAQGTGGKIINIASLLSYQGGIRVPSYTASKSAVMGLTKLMANEWAKF  
NINVNAIAPGYMVTSENTAPLRADPVRSEELLARIPAGRWGMPEDLQGAAVFLASDASSYV  
NGFTIAVDGGW LAR\*

>SPBDM4\_v1\_40818|ID:27158123|kduI| 5-keto 4-deoxyuronate isomerase [Uncultured spirochete bdmA 4]  
MEAREYVNSDYAKMMGTQELREAF LIEKLFVPGESIMVYSHVDRMIVGGIVPTKEPLALP  
VSKELGTEYFLERREMGIINIGGAGTIEVDGTRYDIGPRDGFYISMGSKEVKFSSKDPGE  
PAKFYFNSAPAH RACPTRLVTFEQAKHVAMGSDTECNKRVINQYIHPAVLET CQLVMGMT  
TFSEGSVWNTMPAHTHERRMEIYL YFDMPQDRIVFHFMGKQPQETRHIVRNEQAVISPSW  
SIHAGVGTGKYTFIWGMAGENQTFGDMDNVAMADLL\*

>SPBDM4\_v1\_40819|ID:27158124| Transcriptional regulator [Uncultured spirochete bdmA 4]  
MADIRVQSLDRTFDILEILAREPSGLTLAEISAKADLPRSTAFRLLA VLLQRDYARKASE  
TNR YRLGPGFIELSGNYLNSLELKTESAPFMRELASTLGTIVFLARRQGNMMVYIDKQDQ  
FTSLRKYAIIGEQRPLYCTALGKALIDMGDEEIRTLLSNTAFQKFGPHAHADIDSLIED  
IHKARGWTHDNEEAEPGVNCVAAPIRDYRSQIISSISTSWFLESRPELEPEKAAIHVT  
KAARAI SAAMGFSGKE\*

>SPBDM4\_v1\_40820|ID:27158125| Nitrogen-fixing NifU domain-containing protein [Uncultured spirochete bdmA 4]  
MLFEEVKS A IENVRPSLMADGGDIELVSVDG VVKVRLTGACGSCPYSIMTLKQGIEAY  
LKKAVPQVKEVQQD\*

>SPBDM4\_v1\_40821|ID:27158126| Protein Soj homolog [Uncultured spirochete bdmA 4]  
MARIIVFVNQKGGV GKTTSAINIGTSLALLHKK TLLIDFDPQGNLTSGIGGKLTHSNIYH  
VISGLTEIKNIIQPLAIPRLFLAPSSVDLSGATIELVDRPDRNDYLRRAIPIVDDYDFV  
LIDCPPSLGVLTNLGLAAATEVVIPLQCEYFALEGLSLIIQTIGLVQKSINPNLKIGGIL  
LTMFDARTRLSQEVVRQVTEYFKDKVFKTIIPRNVRLSEAPSHGLPAIMYDPTCIGAKSY

EAVTKEIMNRG\*

>SPBDM4\_v1\_40822|ID:27158127| ParB-like partition protein [Uncultured spirochete bdmA 4]  
VAKFGLGKGLGALPEHQFFEQSSQEIPESIVRLVSIETLIPNPDQPRKTFSESDEL  
AESIRRHGLLQPLLVEHQEAGKYTIAGERRYAAQIAGLEQLPVIVRAQNDSDRHLELS  
LVENIQREDLDPIEEAQAAYVKLMEISGATQERVAEMVGNRVTVANTIRLLRLPEDIQAA  
IKQGTISSGHARALLSIEDQEERKKLFDRIREDNLSVRQTEQETQKLQSELQARKAKSRK  
PHLAAHEGVEASLDPLLKELKEKLIERLGTKVEIQGSLDGGTIKILYYSQEDLQRMVDVL  
KLE\*

>SPBDM4\_v1\_40823|ID:27158128| exported protein of unknown function [Uncultured spirochete bdmA 4]  
MKFWVQRLKKFLLPAFIATALIGTATFPLFAQQASGSPASIPISKISSQLPAAFQAALPQ  
GVSFQPGSPILRTAEHIGGGLMLAPSLDGASTVVDHINSAGTASNLIIEALVFLPAPTA  
NPYSAGTQLDSLGLLFNQFSSLQGIQYWSASRKIMRTFYTDVHRLDNPKNDRNKIEDPTSA  
AELHTLLSRPAIYQKQDQTFDGTVEVRCFMSQTSFLMTNTNATPLRLIGIPVLPVDGLR  
TGFLVAPSPEGVLLYFVTSMKSPSISRDRVFESASNKALALLHWFVEAASARQIIVPTNL  
PWNFDDLPEARLARP\*

>SPBDM4\_v1\_40824|ID:27158129|eno| enolase [Uncultured spirochete bdmA 4]  
MSIIEYVEAREILDSRGNPTIEVDVLEDDGTLGRAAVPSGASTGEYEAVELRDGDKKRYQ  
GKGVLTAIENVNTTIAGEICGLDSLEQVDVDRTLIELDGTENKGLGANAILGVSMATAR  
AAAEYLGLPLYKYLGGVHTLLPVPMSNIINGGKHADNKIDFQEFMIMPLGAESIREAVR  
MNAEVFHTLKGILKAEGHNTAVGDEGGFAPNIGNEDALDYIVRAIEKAGYIPGEQIAIAL  
DPAASELFEEGGGKGYRFWKSNDPKTFSADEMIELYTTWVVKYPIVSIEDGLDQNDWDGY  
VKFTKALGKKIQIVGDDFFVTNTKRLAKGIEMGACNSILIKLNQIGTVTETIETINMAKR  
AGYTA VVSHRSGETEDTFIADLVVGLGTGQIKTGSMSTRDRIAKYNQLMRIEDEMEGIAE  
YWGRKAFYNVHG\*

>SPBDM4\_v1\_40825|ID:27158130| Membrane protein [Uncultured spirochete bdmA 4]  
MLTRRLDEAKEAWKRRDPEAARRAHLPPAGIQAEKHTTKGKYLKSIYGGLDGTITTTFA  
AAAGVAGAALSPGVVLIVGLANLLADGLSMSIGDYLSKSEAEEYEAEREREAWEVENYP  
EGEKVELEEIYTARGMSKEDAHAAVEIIAKDKKAWVDMMVEELGIMQSDSPTANAIAIAT  
FISFGLFGFLPISAYVLALFIPSLDAIRFPLACVLTGVTLFSLGALKTIITGKKWLKSGL  
EMLLVGGIAASAAYLVGMLLGLLA\*

>SPBDM4\_v1\_40826|ID:27158131| DJ-1 family protein [Uncultured spirochete bdmA 4]  
MKTACLLEAGFEEVEALTPADYLRRADINVTIAGIAGRKVKGAHGIVVETDAGPEALER  
DYDAIVLPGGMPGARNLAESSTVRNLSRHYAQQGLIAAICAAPAVVLHGACNLLQGKRF  
TGYPGTEDSVQGAHFVPERVVVDGNIITSRGPGTAGEFAVAIIVALENSQKADEVAQHAL  
LK\*

>SPBDM4\_v1\_40827|ID:27158132|yjgF| Enamine/imine deaminase [Uncultured spirochete bdmA 4]  
MNKQCIGAPNAPAAIGPYSHANRAGNFVFCSGQLGIDPKTGGLAEGIEAQDAQALHNLAS  
VLEAGGCSPADVVKTTVFLKDIRDFSAVNAIYGDFFRKDFPARSAFQVAALPKDALVEIE  
AIAYKA\*

>SPBDM4\_v1\_40828|ID:27158133|patB| Cystathionine beta-lyase PatB [Uncultured spirochete bdmA 4]  
VPYNFDSLIDRTKTHSIKWDTGLLPEDCRDAIPLWVADMDFASPPEVVEAIQDRAAHPIY  
GYTNCSEYYRSFIEWMKRRDSWDIKKEWIVFSPGVVPALNLA VLA YTPGDKIIVQPPV  
YYPFESA VRNNGRQLVENPLVIQDDRYTMAFDDLEKKIDSHTKLFILCSPHNPVGRVWTT  
DELSRLVDICAGRGIVIVSDEIHSDIILGTEVHHCTATVSDKAAAITITLTAPNKTFNLA  
GLQTANIVIPNARLRNAFVQQVTNIGLGLSNIFGMVAQGAAYDKGEPWLEELLIYLRNY  
DTV RHFLAQRVPVIKVFPLEGTYLPWLDRCRGLGLSDAQLHALFLKDAKLWLDGDMFGTG  
GSGFMRLNIACPRSILVKALEQLEKAVYTIS\*

>SPBDM4\_v1\_40829|ID:27158134|mntP| putative manganese efflux pump MntP [Uncultured spirochete bdmA 4]  
MLTYILVGFALAADAFAVSASAACTDALPLLIGLRAAFMFGLFQFFMPIVGVLLGSAFS  
KFIQGFHDWIAFALLAVVGGKMLYEAIRARKKADCPDPDESPKVNKIMKWDTLVLAFAT  
SIDALAVGLSYSILGESIFIPSLIIGVTTFGVCLLGIIEFGKRLKNVLKEWTEIAGGSILI  
LIGLKILIEHLARGQ\*

>SPBDM4\_v1\_40830|ID:27158135| Flavin reductase domain protein FMN-binding protein [Uncultured spirochete bdmA 4]

MATSSIPEKYKEIPAGKAYS LQNPGLILLCTRGSTPKSSALRYDFAPLAWCTPYEYDPV  
SKLLLVCDTSHKTRDIQENGQFVVALPSFEMRALIERAGAVSGFDVDFELLEVPYFTA  
QSIDRIPEGVAAWMECSLERIIVEGTS GIVLGA VHKAFGVPESWKLRLHYLDDTTWYTP  
GKRL\*

>SPBDM4\_v1\_40831|ID:27158136| exported protein of unknown function [Uncultured spirochete bdmA 4]  
MSKRTLFALSLLLFYGS MYVSASPGISFSLNSIKTNSDIIAGLPLPAGADLAL EIPLGSM  
TSLTLRGAAGYESRMILRDTTTSVP IAEPATIDGTNR FYWTKALAEIGLRQYLIRDDDA  
AWLFGLVRGRYESNATSFPTTLFTDAQNIESVSGTAGIAFDSSRWREINRKTGT YAELSV  
EYSPQFASFTSTPTNYGRANLTAEAFIPLSAECNTRLRNPSLIAPYL VLYGAGDYAAGSAI  
PQEVLTSGGLVGTEGIGDMVRGAQSWGYESPAKAYASAELRVAGPSLFKNL VVYPVGYI  
FADAAGYAGLYGSPNGSSLADNSGVFASTGAGVSLSVLNFLWLGAYAGWRWPIHDPLAPI  
YYSSPQGFFWNFTFVAHY\*

>SPBDM4\_v1\_40832|ID:27158137| conserved exported protein of unknown function [Uncultured spirochete bdmA 4]  
MKKFLIALVLMAGAVWAQTPGGISSAMSTRMEADFTKIVTDMGWGTVDTVHPVLAERM  
WDYYFFYPVLNKDKQVTGYVWWAKNVRIASHYDDILAIINPDGTLQNLWVGANSRHADFY  
TDFAKKSQGA AIQKFIGMDSKR DWNEATDAVSGSTFSAYKYFGELKAVLACFKIYVIDAG  
KLIK\*

>SPBDM4\_v1\_40833|ID:27158138| conserved protein of unknown function [Uncultured spirochete bdmA 4]  
MQILDNVNNTLKDDLAATISKGDKLSIAAACFSIYAYEALKKQLEGIDELRFLFTSPTFL  
REKAPKEKREFYIPRLNRERSLYGTEFEVKLRNELTQKAIARECAEWIRKKAHFRSNVTG  
GQMSGFLSVVKPSETIAYSPINSFTTSDLGCERGNTIMNLVNRIDAPLAGQYVKKFEQIW  
NDKSLQDVTQVVDGITAAYNENSPEFVYFVAIYNIFNEFLEDISEDLPNEATGFKQT  
AIWNKLYDFQKDAALAVINKLEKFDGCILADSVGLGKTFTALAVIKYYELRNRNVLVLT  
KKLSENWNTFRQNYLNNPIARDRLRYDVL YHTDL\*

>SPBDM4\_v1\_40834|ID:27158139| conserved protein of unknown function [Uncultured spirochete bdmA 4]  
MTGHIDLAKLNWSNYDLLVIDESHNFRNGGDYSGRGDDRRENRYLRMLMNVIREGIKTKV  
LMLSATPVNNNFSDLRHQLELAYEGKPALINDKLGTSKPIDLIFRDAQTAFRWSKLDPR  
ERTTENLLHALDFDFFTVLDSVTIARSRRHIEKYDYIAKIGKFFPERMKPLALRPKLTDL  
SAIDYDEIYEELMLLNLA VYVPTDFLLDSKRAKYIDPSANIDRAGREIGIRRLMCINLLK  
RLESSVYSFRITLARVRALIDGAIADIDNYADNYAHGTSKIIRAQELSEDEFDGDANTD  
FFVDGGKKLDIDLADMDYVSWRQKLAEDSETLALLMSMVEDITPGHDTKLQALLDLIAEK  
IQNPLNAGNKKVLLFSAFADTVQYL YDHPHIKQRFGLDSAMITGTIDGRTTVKLPRAD  
MNTILTLFSPISKDKSLLMPNPAEIDILATDCISEGQNLQDCDFCVNYDIHWNPVRII  
QRFRIDRIGSHNERIQLVNFWPNI DLKYLELKGRVETRMKASVMAATGEDNPIDPEEK  
GDLEYRKAQLERLQNEVVDIEDMQSGVSILDLGLNDFRLDLLDYIKDHDELDPFGLHA  
IEKGNEDCPGGTIFILKRNAGIKPRNRNQLHPFYMVYVRDDSTIHVDHLHPKLLDAFR  
QLCKGKAEPVLELCGRFNAETK DGRDMRHYSDLLHVAVKSIVDLNEGDSIDGFLSGRQIS  
FATGKIDGLDDFELVCFLTVK\*

>SPBDM4\_v1\_40835|ID:27158140| conserved protein of unknown function [Uncultured spirochete bdmA 4]  
MFGLPKSTEINKPLPKKVFDTFNLKPADRRLFDEQINRMTIVAEISPQTVSVAASGDVS  
AVFVILVTLKVPECDKKNIALLSKLIDQRMIFALRYEGDVRLAVYRAGRVLSSQSKPLEE  
WKLSSGLDLGAVWEKIIAEIGGVDLAGGKLD ETIAASERRDKLTGQIAALEQKAMNEQ  
QPRRWEDAEIKRLKAELEELNNG\*

>SPBDM4\_v1\_40836|ID:27158141| protein of unknown function [Uncultured spirochete bdmA 4]  
MDKPEKLAMQTPNLADGNFAALSRLFPNAV TETIDENGAVVRAIDAEVLAQEINTRV VAG  
REER\*

>SPBDM4\_v1\_40837|ID:27158142| DNA methylase N-4 [Uncultured spirochete bdmA 4]  
VDFDTTENLYIEGDNLDVLKCLRETYLNKVKMIYIDPPYNTGNDFVYEDDFAGDADEFLS  
RDGQFDEQGNRLVKNLDSNGRFHTDWLNMMYPRLRVARDLLTEDGVIFISIDDNEVENLK  
KVCNEVFGEGNFVAQISVLSNPKGRS QDKYLATCHEFALIYSKSVLRK GALSILKDEDDI  
KSNYPLTSDSGSYRLL ELRNTHREFGKHNRPNLYPFFVDANGGISLLPTAEHIIPVYPN  
WNDGFEGCWTWGTNTALDNM HLLVARKVNGEWKIYRKA YALQDGEIVKKQLKTIWSEKIY  
YTEKGQKTFSELFSREKIFQSPKSVDVIKQMAEMVMKKNDIIMDFSGSATT AHAVMQL  
NAEDGGKRKFILVQLPELTDEKSEAYKAGYKNICEIGKERIRRAGKKIKDEAGLQAQDLD



IGFRVLKLDSSNMKDVYYTPEQYEKLNFDLEGFKDNIKPDRTDEDLLFQVMLELDIPLSA  
QITQDVGTSNGSRTFSVNDNDLIACFGGVDTALLTEIAKKHPYYAVFRDSSFISDSALVN  
FEQVFNTYSPNTTRRVL\*

>SPBDM4\_v1\_40838|ID:27158143| conserved protein of unknown function [Uncultured spirochete bdmA 4]  
VKFQKPPYTITEKAADYLAKIVETATRLEFGTEFKRDIRLHRQNRVRTIHSLSLAIEGNSL  
SLDEVTAVIAGKVVAGRQEEVKEVKNA YEAYDKIMTFDPYSIGDFLKAHELMTSGLVEES  
GKFRSGDVGVFDGDKVVHIGARPQFVPLMDELFGWAKTSELHPVLKSAILHYEIEIHP  
FADGNRGMRLWQTL LAKWKSIFAWIPMESVLYQNR PQYYQAI EDARKANDSGVFIEFT  
LFALLDSIVLQEKHQVKHEDKHQVERKVERHVEQLPPIALSVLKALENAALSRRVFAAI  
GMYGDSRAFKRNIAPLLAGGYIEMTVDPKPN SRLQKYRLTDKGIAALGQAVTALSENDNH  
RFANRGGKK\*

>SPBDM4\_v1\_40839|ID:27158144| conserved protein of unknown function [Uncultured spirochete bdmA 4]  
VKFQFKIQPFQTEAAESVVRV FAGQPNHGERKYRRD VGRREAQAVFAEQDSEFETAYRNA  
DVELTAQQLKNIRTVQTANEIKY STELVPGLGAVSLDVEMETGTGKTYVYIKTMFELYT  
AYGWSKFIVVPSIAIREGVMKSFEITQEHFMELYGLKARFFVYNSSNLHQLDEFSQNSG  
INVMII NTQAFNTTMNEDKNIEGRSGNEAARI IYSRRDEF GSRRPIDVIKANRPIIILDE  
PQKMGG AATQNALKKNFNPLFSLNYSATHKTSHNLVYVLDALDAFNKKLVKKIEVKGFEL  
KNLGGTNGYMYLSSIELSHNKPPRARLEFEVKHQNGIRPETHLLDVGDNLYTASNGLEEY  
RNLSVAEIDPVRAMATLSNGAVLAAGEACGNINEDDIRRIQIRETILSHFEKEEKLFEQG  
IKCLSLFFIDEVAKYRLYDDDGEVVLGQYGRIFEE EYSDALNERMTLFP SAYSQEYLSGIK  
TSETHRGYFSIDRNGHAVNSATARGSEFSDDISAYDLILRNKERLLSFDEPTRFIFSHSA  
LREGWDNPNV FQICTLKHSDNATAKRQEVGRGLRLCVNSSGERQD VDVCGETFVHDVNML  
TVVASESYAGFVAGLQSELKADLYDRPTKASVDYFNGRTVY\*

>SPBDM4\_v1\_40840|ID:27158145| conserved protein of unknown function [Uncultured spirochete bdmA 4]  
MSPQIALYSESIHKL VREIFDPGV LKDITVNGHDTKIRGNPLNANWSDFKELWERINKRY  
AYTVEFDSAELVAKSIAAINAGLNVAQLVYTTTQGEQQGVEFSIERTETKKLDRAQGGFA  
SYDLIGKIVEGTTLTRRSVAAILMGIDRKKLQLFRGNPEEFISRAADIINKQKASVVVEH  
IMYAPSAEEPYSQDIFTMSRASDEYARAFKARHAIQDYVFTDGTAAADSVERKFAWDL DAA  
SEVIVYAKLPKGRGLYIPTVGVKYS PDWAI SFKKGTVKHIF FIAETKGTMSLELRPIE  
RAKISCAKKLFNEISTSGVKYHVDVDSYQTL LQVMETL\*

>SPBDM4\_v1\_40841|ID:27158146| transposase [Uncultured spirochete bdmA 4]  
MKSISDILGGMQILLEVSFDIQAGFEEYLTKDQRTFLAILRVIEEHLRVPYEAESRYGRP  
AYSLPPFIRALWAKSYFRLTMDDLRKRLLSDPNLRMICGFTKVPSLATFSRRMSLLSES  
SLMEKSFETMVSEYYAGSIVGDVARDSTAIAAREKPCNKKSDVALPKPKKYRRGRPRKGE  
EHPRKAPPVIAQH TTMSLEEALHTLDTRCSWGCKKNSQGNVSYWKG YKVHLDVTDAGIPI  
SVVVTGARVHDSQVAIPLERMTEARVTHLYSLMDAA YDSNTIRSF IQERGRVPLIDHNKR  
KVDTRPPFPDASQRRYAIRTTVERTNSHLKDWFLSSPYFVKGIKKVTFQVMCGVLCLTAI  
KILQFFIAPSLAKSA\*

>SPBDM4\_v1\_40842|ID:27158147| protein of unknown function [Uncultured spirochete bdmA 4]  
MNIMGLNYVLSATPLFMPLSLDES NLFYIRKPKVKEMKKRKRTRNNIIIGGSFKSHEMSEF  
\*

>SPBDM4\_v1\_40843|ID:27158148| putative type I restriction enzyme HindVIIP M protein [Uncultured spirochete bdmA 4]  
MAEKNTASIGFEQQIWAADILRGNMDAAEYKHVV LGLIFLKYISDKFEERYRELEADND  
DVEDKDAYAEKNIFFVPPSARWSVISEAAHKEEIGTIIDDAMRAIEKENKRLKDILPKNY  
ARDELDKRRLGNVVDLFTNIQMIIEHGTDKDILGR TYEYCLAKFAEQEGKRAGEFYTPSCV  
VRTLVEVLQPFKGRVYDPCCGSGGMFVQSTDFVKNHSGNIGNLSVYGQDANPTTRKMALM  
NLAIRGIEADLGGYNADTFHNDLHPTLKADFILANPPFNLSDWNDGSLNDDPRWKYGLPP  
SGNANFAWLQHMIYHLAPNGKIGMVLANGSLSSQSGGEGDIRRKIVEDDLVEGIIAMPTQ  
LFYTTQIPVSLWFISRNKKQK GKTLFIDARKMGTMVNRRLREMTAEDIAKIAATFEAFDE  
GTLEDVKG YCAA VTTEDIAKQEYILTPGRYVGI EEQENDGEPFEEKMARLTGELSEMFKR  
SHEQEDEIRKRLGAIGYDI\*

>SPBDM4\_v1\_40844|ID:27158149| Restriction modification system DNA specificity domain protein (fragment)  
[Uncultured spirochete bdmA 4]

MAQTIFKSWFVDFEPWGGGEIPSDWQVVEFSSFLAPRIEKSSDPTIPLFSVTDGTGIYPRGE  
KFNKNLSKADTKNKIVRETDLIFGMSREILNWGVMRSPIGGVSSAYNVFVSDSGINSKYL  
ESFIKAHHSYFKDLIRPATREGQGVDKGALMLKSIYLPQNDALADYYAIEDALTAQIREK  
EVESARLASLRDTRLRLISGELSVADLGDGAK\*

>SPBDM4\_v1\_40845|ID:27158150| Integrase family protein [Uncultured spirochete bdmA 4]  
MKDRLITEIQASMAPMLTQAQLEKLRRVLTSLHNVEVTERKASDTQETAENGGLLEVFI  
AAKRIEGCSEKSLKYYDATVRAMLKAVKKPVREIATDDLRLQYLANYQKERGSSKVTIDNM  
RRIFSSFFGWLEDEDYILKSPVRRHKVKTETIKETFSDEGLELLRDACEEIRDLAMID  
LLASTGMRV GELVQLNREDINFHERECVVFGKGGSERMVYFDARTKIHLLNYLDSRSDDN  
PALFVSLTSLNERLLIGGIETRLREIGKRAMQKVHPHKFRRTLATRAIDKGMPIEQVQR  
LLGHVKIDTTMHYAMVNQANVKNSHRKFIG\*

>SPBDM4\_v1\_40846|ID:27158151| Restriction modification system DNA specificity domain protein [Uncultured spirochete bdmA 4]  
MHQGWMPTRIGDICKTNQQTYSVSEKWPVFNLYLDTGNITENRVSEIQHLVTGQDTLPSRA  
RRKVAVDDILYSTVRPNQRHYGIVKEVLPNMLVSTGFAVITADKAVADSDFLYYYLTQND  
IVDSLHAIGEQSVA YPSIKPSDIESLEMLLPLDEQIEIGRTLRLALDDKIANNKAINHH  
LEQMAQTIFKSWFVDFEPWGGVMPDWDREVPVGGVEMSTKALNPQSCPDTVLEHYSIPA  
FDETRLPVFEAAAEIKSNKYIVDKDCFLISKLNPTTKRIWRPCCISKHAVCSTEFIVYRA  
KNPAHKDFYYSVIDSPAFTDFLLSHITGSTGSRQRAIPRETLSFSVIVPPDDIIEDFCDK  
VAAYIAHFEQNHLESRLRQIRDSLLPRLMSGELSVADLGDGAK\*

>SPBDM4\_v1\_40847|ID:27158152| putative FRG domain protein [Uncultured spirochete bdmA 4]  
MKEERISSVNAFVDRITKLRSEIPAGNAEQWFFRGQKCSLWGVQPNIFRSNGLSQEHAI  
ECAQRQNPFRDCVSNFEILTKLQHYGLGTRLLDVTLNPLVALFFATEQSVSYTKNANG  
QYSYQEHDGKVLRYRFVNGCALRDLQIRVALEIPFVEFGKGLSLEAFCLQLRDTKAISNGE  
YESLIADNYEKAINVIQTNSFIVATNSNARLIQQRGAFLSTAVNVKSNTDVKTSALSKA  
RLDLDFEFEGYFIIPAKDKEEIRTELDFFNVNEATLPELEHQMR YIQTQATVTVGTIEE  
YSQYVRKTARLSTASKNLNKSEVETIVKALLSELDDKISDDVVGAIIEQQELDWQNKDSV  
ISRIRRTINKILSNSFSAVEAKNKASAIVDNLLLEVQ\*

>SPBDM4\_v1\_40848|ID:27158153| Type I site-specific deoxyribonuclease, HsdR family [Uncultured spirochete bdmA 4]  
MSYTEANYENAVIEVFRNTLGYRYVYAPDLARDYSDPLYMDEILPALRRLNPKLPEAALA  
EAVYKLRNFEGGTVLQKNVQFMSYLQNGVSTNYYDKGEQQAALVYLVDYENVERNTFTVA  
NQWTITENSEKRPDVIVFLNGLPVVVFELKSPSREETDASEAFLQLRNYMHEIPSLFIYN  
AFLVMSDLAISKAGTITAGEDRFMEWKT KDGSYANTQYAQFDTFIEGMFDKTRLLDIKN  
FICFSGDTKILGAYHQYFAVRKAVASTANAIVTDGKGGVFWHTQGSGLSMVFYAHLLQ  
ETLNSPTIVVLTDRNDLDDQLFGQFAKCAAFRLRQTPQQAESRVHLKELLAGRQANGIIFT  
TMQKFEESEALSRRNIIVMADEAHRGQYGLEEKVDAKTGRVILGTARIIRDSLPNATY  
IGFTGTPISSKDRSTIEVFGNYIDIYDMTQAVEDGATRPVYYESRVIHLKLDEDILQLID  
AEYDIMAQNAEPYAIEKSKKELGQMESILGAEQTIALCEDILKHYEENRQYELTGKAMI  
VAYSRIAMSIYRKMLQMRPEWTEKLGVVMTSGNNDPEDWREIIGNKRHKEKMAKKFKDN  
DDPLKIAIVVDMWLTGFDVPSLATMYVYKPMTGHTLMQAIARVNRVYKDKEGGLVVDYVG  
IASALKQAMNDYTNRDKNSYGDTDIAKTALPKFIEKLEVCRLMHGFDYSAFLTTESDLV  
RAKTITGGVNFSSIEKPKHGVMDGEDWRYPIVAADPSPGYAESPSKKDLFIKESMLLR  
QALSLSRLLTAEQRFEAAAYFEAVRLLTRITGEGKPLSLKEINARVNELLKASIQSEGV  
INLFSVDVTGFSFLDPKFLDEIAKMKERNIAVEILKLLAEQVSLYRRTNLVKSEKFSEM  
LSRAMKAYLNGMLSNEEVIAELMKMAKDMANAQAEGDALGLSDEELAFYDALTRPEAVKD  
FYQNEELVAMTHELTDMLRKNRTIDWQKESARAGMRRMVKLLKFKYPPEGMEDAIAT  
VIGQCEMWTDN\*

>SPBDM4\_v1\_40849|ID:27158154| protein of unknown function [Uncultured spirochete bdmA 4]  
VGRELQGPVYLRTRIILPRPKVRRKECFVTTKPDADNLVKGIMDVLQIRAWRDDAQIAK  
LEIEKVTRPRTCHVARRSRSLYRSSLPICVRGSDTRHNTDTMRNTRKHIRPCMLCTHK  
NTFKLENQVFSMNP\*

>SPBDM4\_v1\_40850|ID:27158155| protein of unknown function [Uncultured spirochete bdmA 4]  
MNESWMLIDTIRVLGTPKAQPRVKAFVRGGHASVYTPSTANG\*

>SPBDM4\_v1\_40851|ID:27158156| protein of unknown function [Uncultured spirochete bdmA 4]  
MKTPDIQEKRQTGSVSSPPQRLPLGSLPNARRSLTRLMSIFYKGEMEASKFKTILYGFNV  
LLGFLKEERLDQIEKRIKALEDAAKINTKGEVK\*

>SPBDM4\_v1\_40852|ID:27158157| protein of unknown function [Uncultured spirochete bdmA 4]  
MLNTSDDFEASVDTSGKLERERLDRLSNIKIVSGSELMQTKFEAPRYFWEGILPDAGLCV  
MAASKASGKTMFLLQAADAISKGRDFLGIPTRLTKTLFVELELTKRKMQERLTKMGIVLD  
DNLGFAFNGKQGDVWLQTIQDAVVEYGYKLVVVDVLQRLWPEKADTNSYQDTYALLGPLR  
AIANELQCLIVLVTHCRKADVVDYIDGVIGSVGIVANADVILTLKRERGASEAALFIDGN  
DIEHKELALNFNTDPLGFSLNASPAEIGLTSERRDVLGAIRSLRGSARPAQIAELLGKD  
EKAVSKLCIKLVTDGLLKNTKYGTFALFDPEKVGEVGEPEVDRNASPTSTTSPGIFGGD  
EAKLCVS\*

>SPBDM4\_v1\_40853|ID:27158158| protein of unknown function [Uncultured spirochete bdmA 4]  
MNIIPQLPDWMTEKLGKIAATTDIWALEQESITILASEIRTFPELAEIFPKTFRTKVQHG  
KPRELEPLERASIIIAAYDWQAVLDLWKGSTIEEKVAAKFGALAFALRQGGEIC\*

>SPBDM4\_v1\_40854|ID:27158159| protein of unknown function [Uncultured spirochete bdmA 4]  
MAAANNTRAAELLEVAKPYPYLLKLFENAPAYGTEGIACVFHDGEITRIDVSASVQRKVAPH  
AAREGGMK\*

>SPBDM4\_v1\_40855|ID:27158160| DNA binding domain protein, excisionase family (fragment) [Uncultured  
spirochete bdmA 4]  
MTEFLSVEEVAALLKTTRGYVYKLVCEERLPCYKPNGGRLLFDPVEIEEFIRSGRRSTHR  
ELSDRATAILNSRRK\*

>SPBDM4\_v1\_40856|ID:27158161| protein of unknown function [Uncultured spirochete bdmA 4]  
MSTEFEREIGSSMMPNENPGDLVENEKWEACKKRLTILRPETEEAKHEFLLEEAAARTLKI  
GQEELITKAKKQFRDNYIEDDEKAIRREETKIAAYGKQPQEYLKKAEEAAEALLAENTSSV  
KPIDNDFPAILSILLITKQTRTSQAKRAEKALSKISEYDIMRTIRMMFENKDSIEELYKA  
WGKPGWDINALRSEARRRGIREELLE VHAIQSGEADRLQEVGKKVVEGGRKGRVASYGS  
EKSRRKDQVLKKYGEIMGQPHKMPESVKKQIAKEFRISLYTVRRYLQNR\*

>SPBDM4\_v1\_40857|ID:27158162| putative Site-specific recombinase, phage integrase family [Uncultured spirochete  
bdmA 4]  
MSVRLRQKKGHLYLDTYERGRSWEALHLTVPKDAAGRREVMALAEYRRKREMQLFAQR  
HALTDPVKNKMKLIDFAEEKAKGYDKAAHLPKSIKYLKPYASETLLADVDERFVDGYRAY  
LLEQKTLGATSARHYLDAFRALMAQAVRERLIEVNPAKNVRTIKIKEAKRPFLTVDEIQA  
LFNTPITGETLAEDCKRAFLLSCFTGLRLGDLKTLTWGDIQREPEPAISKIMNKTGEIIT  
IPLVPSAWRILDDKQLHRRDELVFPALAKSTSEYKPLDRWRKTAGIDKKFGWHAARHSFA  
MMSLDVSGDIYAVSRLLGHS DIKITTAYLHFMDARKRQILDALPDIDTQEKGEALKFKAA  
E\*

>SPBDM4\_v1\_40858|ID:27158163| putative Phosphoesterase PA-phosphatase related protein [Uncultured spirochete  
bdmA 4]  
MALIESMHAELHYIQQQLQSFLGPGRLIPMQIVSLFASEAFIIAIVPAIYWCVHRKKGAE  
LGLLILGSTFINLWIKQLLAWPRPYEIIIPSLGLAKESTYGMPSGHSQMSVVFCA YAVQFL  
PKKWRIPVLTGVPLLIGFSRVYLVGHFVPSDVIGGYIIGAVFFMLFKLFGSDIKKALQHSE  
WRLRVILAAVLSFIMNSLLPEDTMISGAFLGAAAGFALASRNIPIDQQD TVRQKIFRYLA  
GLASTGIVYFALKFASNPLNALSNSQAQLIHFVRYAIVGGWVSYGAPFIFLKLGLATRE  
A\*

>SPBDM4\_v1\_40859|ID:27158164|apbE| Thiamine biosynthesis lipoprotein ApbE [Uncultured spirochete bdmA 4]  
MRFSKAFLRSVAAAVLLAAGTVAAFLYAEELSKTDFVLGTVCTIRLIDGGTNATLGEV  
FSRLRNIEHMSVKNKDDSEISR VNAMAGKEPVQVSEDTFYVVS KALEYARLTNGAFDPSV  
GPLVKLWNIGNNGGEKVPPEKEILAAKALVDWRQVVDADTRKVFLKPKGMRLDLGAIAGK  
YAADEV EKILADHKVKAIVDLGGNIFVFGGKKDKSPWRVGIQNPESARGEYLGIVTGGQ  
MTVVTSGVYERYFFENGKRYHHILSTQTGFPVDNGLVSVSIVSKSSIDADALSTSLFILG  
IEKGMFLRQFPD TYAVFIDKDNKVYLSPGAGKVFTLQDKDYQLAEK\*

>SPBDM4\_v1\_40860|ID:27158165| Beta-lactamase domain protein [Uncultured spirochete bdmA 4]  
MASTVWRLKVGPIGVNICYIVASEGAVLVDPGAEPEKIHSFLQTQALAPTMIALTHGHLD  
HTAAIPGLFEMLGTELPIAHPADAHYLGEAGETTRELFD AIGAPSYFHAFWKPLPKAA

VFLSEGMMVPGTSLRVIHTPGHSQGSICLYEAVLNAGSYGADEEAREDAAEKSLGWSCLI  
SGDTLFRDGVGRTDAPSDPVALERSLKKLAHLSFATLVFPGHGPRTTIGRELPAALRD\*  
>SPBDM4\_v1\_40861|ID:27158166| protein of unknown function [Uncultured spirochete bdmA 4]  
VPDDTAASKFNEKNLEAFLEGLLEELKHPQDAKILLEDVRRRAFRKKVPFHLSYASALMIL  
RAAGIYRPKSPKKVLQEPAPRSRNAMEQTNVEPKQELQNKAMVSLFVSMGKRHHLKPLEL  
KKKIAERTGLPQDTLGRVHLENYSFIEVPVQEAQRIISAMVGTINGRALEIKPAKKRS  
ESFPEGL\*

>SPBDM4\_v1\_40862|ID:27158167| 3-dehydroquinase dehydratase [Uncultured spirochete bdmA 4]  
MEKNDRPKICICLTGETIAEDLRILERYRSMVDYAELRADCLDPNERFYIRSFPEKAGLP  
CILTIRRLQDGGKFEDGEGVRLVLFKALSFPKAEASANYAFVDLECDFKAPVVEEACHT  
FGTRIVRSLIYRDSL PENLDTAYDQLTLEEDEIPKLTVPNPQNSADFIRFLEWSLQRPKR  
QILIARGPYGIVSRILAWRLGSMWYASPLQYGMEMAAPGHLDLPQDLVNIYNFDLVDPT  
VIYTLIGQHSIAQSLSPYLHNTAFRKMGNALLVPTPVDSFSDGLKILEMLGGKGAITV  
PFKEDVLPFLAIHSTDVKRIGACNTLVWRDSAWAGYNTDADGFERSLLEFLGKQDISGCR  
ATLIGAGGAAKSIALALFRKGAHALVLRNRTYSAGRDLARKYDFSYTHLDDRAIDQISEYS  
NLIVQATSLGMKGESDPINFYEFKSEA VFDLIYHPSKTVLLKRAEAAGCRTINGYKMLC  
YQAAGQYKLWMNEPPDIYAQLEQPES\*

>SPBDM4\_v1\_40863|ID:27158168|era| GTPase Era [Uncultured spirochete bdmA 4]  
MPKSAFVAIIGRPSAGKSTLLNALCGAKVSIVSSVPQTTRNAIRGIVTRPQGQLIFVDT  
GYHISEKKNLKLRELVLQSLSEVDLILYVIDATRDPGKEEEAIIELLSKEARRIVAIN  
KIDHPEARPLSVEEFVIPRLPDAKRISISASQGTNLSLLDALFSLAPEGPFWYPEEIT  
DQEPVFRIGEIIREKAISHTRDELPHAIAVEYRDSSKRADGVLFAFDILVERDSQKAIV  
IGRQGSVIKRIEEAEADLKKLFDYPIKQLQVAVDPDWRKSDSVLSRMIF\*

>SPBDM4\_v1\_40864|ID:27158169|pth| Peptidyl-tRNA hydrolase [Uncultured spirochete bdmA 4]  
MIRLCAFLGNFGKEYHNHRHNVAWLFLESTRIGAELEWSSKFKGKIAQADLGPETAYFLK  
PHTFMNLSGESVIEAARFYRCKPEEILVHDELEMQFGAFGYKFSGGLGHNGLRSLERH  
LGTRDFWRLRFGIGRPDHDHDIAGYVLSPTFTGEQLDFLTTNVFPEAEKTFYALFSEGIEGF  
EVRYKKVLSISP\*

>SPBDM4\_v1\_40865|ID:27158170| PHP domain protein [Uncultured spirochete bdmA 4]  
MPLWKGNVPCILKQMNLMHLSRFSFDGMSWPEDISLEAARLGLDLVALTDHDTMAGVS  
RFARACESRGLTAVPACEIDVYESQIEYKSELLAYFPNSDAGDCAPQTKGLLRESLQKRR  
ARLEFLDLSAQELYPEKELSFQDLFKDKTGLDFNDGLANEISWSKVDFLYLKARRCILP  
EMNYKAFKKRFFAGGLKKYKLDKPDIA TVVQAVHADNGFVVIPIHIGHKWDDDIALLYRE  
SEKLRIILGWFRAGIDGVELYWYNSDFKSAKINGLVREIAKPQGGFFTYGSDCHGAGSG  
KHTIMKFKGHFDGFPSRKSQP\*

>SPBDM4\_v1\_40866|ID:27158171| protein of unknown function [Uncultured spirochete bdmA 4]  
MFQLTDASLERIIFAMEDQSNELLIDLETGDFIEKSEYQEENPDTASERYVEPPSWDSRR  
GFAILEAFAATVASPELKLALNAALRRGKGVFKAFRQALSND EILSRRFQDFKL RAMRP  
IVEEWIESLQEEQRLARLSEEPEDIGDIVASEIEFKVLPIKDIPFRLENFLTDYAQETFT  
SLPAAIRSWSLSVLLEKAEASKDSIFISFATVDGNTPLMFGIFTLQTSKALPLCVVEGVF  
GSKESAMLSIDWPLVDTISAYASKIGTALMVLEGPLFPSPISEEASAHGFVQSGSVFYKT  
L\*

>SPBDM4\_v1\_40867|ID:27158172| Malonyl CoA-acyl carrier protein transacylase [Uncultured spirochete bdmA 4]  
MKT CFLFPGQGAQYPGMAKDFYETSKAVRDLFQSASDAISMDLKKLLFESDEETLRQTKN  
TQIAMVTAEVAAALSAREHGKPSGAAGFSVGEWPALAEAGVISLYDMFRLVAERGLMD  
EAGNHAGGSTMTAVLYLSPEKIEQVIQEAGLKHCWIANYNPVCVVISGTEADIAIAEEK  
LRQAGARRVIRLKVSGAFHSPLMQEAYEAFRELVEATAFSDPKISLYSNVTGKKMLTAAE  
ARKYASLQIISPVRWIDEELNITADGFDQCLETGP GTVLTGLWKASGSPVSCVAVGT LDA  
LVSFSL\*

>SPBDM4\_v1\_40868|ID:27158173|fabG| 3-oxoacyl-[acyl-carrier-protein] reductase [Uncultured spirochete bdmA 4]  
MRGLSDQVCIVTGASRGIGLAIANRFREEGALVYGLSRTKPHADISWISCDITDEASID  
AAINSIVQKESRIDVVVNNAGITRDGLIMRMKTEDWDAVLTANLRS AFLLSRTVSRIMLK  
QRSGCILNMSSVVGHLHGNGGQANYAASKAGLIGLTKSLAKELSSRNIRVNAIAPGYIETS  
MTSVLPETAKESLKA AIP LQRPGTPEDVAEAALFLCSDRAS YITGVVLNV DGGMGM\*

>SPBDM4\_v1\_40869|ID:27158174|fabF| 3-oxoacyl-[acyl-carrier-protein] synthase II [Uncultured spirochete bdmA 4]  
MSKRRVVVTGFGVVCPGLNDVPTFWSNIKANKSGIGPITIIDSSDLAVKIAGEVKGFNPA  
LRIDPKDSKKMDRFAQFAVYAALEALESARLQKASLDPVRTGVCLGTGQGSSTTEEAGV  
RLAERGPGRVPPMTVAKGLANFAAAQIALSLDIHGPNMTVVTACAAATDAMGQAMHLIRD  
GHADIMFSGGSEASIVRMCMAFINIQALSSRNDAPEKASRPFDKDRDGFVMSEGAGILV  
LEEYEHAKARNAKIYAEIAGFGATCDAHHLTAPDPEGLWVSKAIGLALADAGMKPEDIDY  
VSAHGATATPLNDPIETKAIKHAFGQHA YKLKISSLKS MIGHCIGAAGAIETIAAILGMNE  
GYIHPTINLDNPDPECDLDYVPNKGIHMPVRAFVKESMGFGGQNAVLVITRP\*

>SPBDM4\_v1\_40870|ID:27158175|glgX| Glycogen operon protein GlgX homolog [Uncultured spirochete bdmA 4]  
MNSHWRTLPELHLLPGNPLLPGA VAHPQGVYFSVFSRHATGMILCLYENPHDDTPTVSL  
HLDPVGNRTGDMWHCYVPKLRAGTLYLWRAEGPFAPQEGHRFNPKNVLIDPYAKALTDGT  
LDLCSALAYDDSAPEKDLFSDEPNDRCMPKCVVVEDDFDWEAGDTPLNYPLKDCIYETH  
VRGLTRSSSAKAKHRGTYRGAEMIPYFKDLGITSLEFLPVQEFDSSEFRRN PITGEKL  
SNYWGYPAPIAFFAPKTSYAFPEGADHDSFDPSFPVKEFKYMVRELHKAGIEVILDVVFNH  
TAEGNELGPTLSFRGLDNSIYYMLADDKRFYRNYS GCGNTLNCNHPVMRTFIRECLRYWV  
VTMHVDGFRFDLGSILGRDSQGNLLPNPPVIESIAEDPILRNTKIIAEAWDAGGAYQVGS  
FPGGRWAEWNDRYRDEVRRFWRGDDGFAPPLATRITGSSDLYLQNGKRPFHSINFITSHD  
GFTLNDLVSYHQKHNEANGEQNHDGLNENYASNYGIEGSDVPFIEEIRNRQVKNFFATL  
LLSIGTPMILGGDEFRRRTQNGNNNAYCHDSELTWYDWSLLTQHRDIYRCVKTLIAFRKNH  
SAFRREDFRGLSDERPQSEHGIAHADGIAGTNPPMGPDA STARLAETPPDILWYDEQG  
NPPHWEKLGKVL IARINEHTVAQNL RHSYILAFNASPEAIQIHLPHDHQPDTWGRIADTS  
LSPH DVEEGDYLVLS DQQDYVMAPRSFVLLISSIEATEENPAASG\*

>SPBDM4\_v1\_40871|ID:27158176| putative SEC-C motif domain protein [Uncultured spirochete bdmA 4]  
VKTISGADKASFFLRKGLYELAHHRPARALVFLRKSVELIPPSCESELSKALYWLSIALI  
RLDQRDLAVKSLASAQKLRRQSYARKLYVRNVNAYGMIKRPTNELDDL YAFVSIQLSSYL  
LKRSNHRFGSEAEHSAVLKLELITWKRLNESEEFQNLCEGKELHLFKLKLIDFPSFSAYT  
VGLRYAERQMLRANIDNVQTCSCGSGPLPHMQCCGRIRGLSEL\*

>SPBDM4\_v1\_40872|ID:27158177| RNA polymerase sigma factor [Uncultured spirochete bdmA 4]  
MTEKKRVRETQFSADFDDENVLSMYLREINRIPLLSREEENDYATRAAAGDEQAKAILAK  
SNLRFVVNVAKKYQNQGLPLADLIAEGNLGLLNAIDHYDVTKG YHFISYAVWWIRQAILK  
SICEKSRMIRLPLNRANELVQIEKARALFEGELSEDAEIREVAEFLEMEPEHV KDIISIS  
RDLISLDAPVYDEKNSTTVGELIENEHESPEQTAIQSSLRDDINKVLGTLTVKEREIVE  
YRFGLNGKRPMSLKEIGDRMHLTKERIRQIEKAALKKVSVPETMEILQAYVA\*

>SPBDM4\_v1\_40873|ID:27158178| putative Short chain isoprenyl diphosphate synthase [Uncultured spirochete bdmA 4]  
MNSSTYASFPVFAKLTKK AISERIAAIFQENRAMFGNLP EMGDRLAADMEDFACSGKMLR  
GALAFVGSRLFRGQEE SANAQTL SLAAGLELLQAGLLVHDDIMDHDEKRRGKPTFFHRIK  
NWL VNDHFQIDEKLALDMAEAQGICVGD LFFFIAWQEITKLT PQVSSLVSREHAIVTLAQ  
MRDIAMGYDEQFPDIDDVIDMYHHKTARYTVALPLLAGASMCQRTDAEVLRLLETFGAL  
GIVFQLQDDRLGLFGTEQSIGKPVGSDIKEGKKT PYVLAMLDRINDEERTRFYSMYKSPD  
IDSGDIAWLRGLMITNGVDA YIQEMIEGHLSRARVALEELSKLLTERAESIRLLESFIDY  
SGQRKS\*

>SPBDM4\_v1\_40874|ID:27158179|gyrA| DNA gyrase subunit A [Uncultured spirochete bdmA 4]  
MMAESSNIIPVPIEEVKTSYLYNAMSIVSRALPDVRDGLKPVHRLLYAMEELGLHNN  
APTCKSARITGDAMGKYHPHGDL SLYDALVRMAQDFSLRYPLVQGGQNGFSIDGDPAAAS  
RYTEAKLSKLGEEMLADLDKETVDFV PNYDESLKEPSVLPSAIPNLLINGSSGIAVGMAT  
NMAPHNLREVQAIEAYIDNHEITIDGLMNYIKGPDFPTGGILYGMQGIRDAYETGRGRL  
TVRGRFVIETMKS GREQIVFTEIPYALNKTTLVTRIAELVREKQIDGISDLRDESDREGI  
RIVLELRKGAITKIVLNQLFMHTPLQSTFGVINLALVDGAPKCLNLKELIVYFVQHRFEV  
ITRRSQFELKKAERAHILRGLVIALRNIDEVVAVIKSSKNIDTAKARLRERFDLSEAQA  
QAIVDMRLGRLTSLETEKILAE LKEIETRIEY LKSLADPGA IYQVIKQETHDLAEKYGD  
ERRTEIVPNQVEQINLEDLIKPEEMVILISNKGFIKRISVNQYRSQGRGGKGSNSASLLD  
DDFIQQLFIANTHDYLLFISSWGKAYWLKALEIPEASRQARGSHVRSLLAISEDEEITAV  
VDFSDFSEHEFILMGT LNVVKKVATKEFANAKTRGIIGISLDEGDRLVSAILTGGSDDEV

VLISRNGLALRMEESQVRQMGRTARGVVRGISLQEGDELAAMLRVDSQESMLIITQKGS GK  
RVRYELFTPARGTHGQIIYDPDEASGEVIKAVSVREEDEVVAITSTGKTIKLSVSSVRE  
MGKAAHGVRIVNIDPPDSVIGMDKIIQQE\*

>SPBDM4\_v1\_40875|ID:27158180|gyrB| DNA gyrase subunit B [Uncultured spirochete bdmA 4]  
MESTTSNYSASTIQVLKGLEAVRKRPGMYIGSTSIEGLHHLVYEVVDNSIDEALAGFCDN  
IVVALERQDIVRVEDDGRGIPVDIHPTEGISALELVMTRLHAGGKFDKKNYKVSGLLHGV  
GVSVVNALSSWLEVYVYTGGKEYYQKYLGRVPEKPVVMIGETDKRGTLVRFQADPEIFEE  
TVYSFDVLSNRLRELAFLNKGVKISLIDERLSQLKRIEFRFEGGLREFVEYLNKNKSIIH  
KDVIYFSGVRDEVEIEVGIQYNDGYNETMFSYVNGINTREGGTHLIGFRNALTKVINDFF  
KKS KH NK KIEENLSGDDVREGLTAILSVKVMPEQFEGQTKGKLGNSEVKGIVEGFLSDQL  
DLYFQKNPDVINIILEKCTTAARARIAARQARELTRRKSLLDASSLPGLADCQEKDPTK  
CELLFIVEGDSAGGSAKMGRNRVNQAILPLWGKMLNVEKARLDKVIGNDKLQPIIASLGTG  
IGEDFNVSKLRYHKVVIMADADVDGSHIRTLTLLTFYRYMTELIEKGHVYLAMPPLYRVV  
YDKEAHYAYSDEEKDQLLSETNKDSAKISVQRYKGLGEMNPEQLWETTMDPERRLIKRI  
MEDAILAEEMFVTLMGEQVEPRRLFIEENALAVSNLDV\*

>SPBDM4\_v1\_40876|ID:27158181|dnaA| Chromosomal replication initiator protein DnaA [Uncultured spirochete bdmA 4]

MDDDGNIIWQKALEIAKSQVPESEFIMWFRLAYLGFENG TIRLRANNMFLRDQFVRKYS  
KFMKEISSLVGMPTELSVEAQAQPAIEQHFVQKQTASQANKPSPKSEKAELFQPDAAASLN  
SRSKAEEDFAIETAYASPSARMHEPRSSNLQPRYTFESFVVGENSENFAFNAAA VAEIPG  
TSYNPLLIYGGVGLGKTHLMHAIGNRILRHPHELHIICVTAEDFTNEFIKTIHDRTTNDF  
KNKYRNIDVLLIDDIHFFQSKHGVQEELFHTFNALYDSNKQLVFTCDRPA SELKDFSERL  
KSRFMMGLKTDLTTPGFETRAAIIRKKLDLYKQSFSEVINLIAKS IETNVRDLDSCHIQ  
IIAYADLIKVEPTYEIAQNVIKQLTNAFKPPSIDVSSIIKT VADYYKLSISDLKGGKRSK  
NIALARQVAMFIIRETTDYSTTEIGTEFNGRDHTTVMHSCQKIEDLIKFDLSLFAAVNRI  
TQECKENSVS\*

>SPBDM4\_v1\_40877|ID:27158182|dnaN| DNA polymerase III subunit beta [Uncultured spirochete bdmA 4]

MKFICDRDTFAKEIAIAQDIASKNAFSSIMSNVYLEVMDSKLFIRATDAKVG FETEIPIS  
DAEPGSLTVFCDKLLAITNSIPEGDMRFEQHESSIEIRPLSKKVR FQLKTIAGDKFPEIP  
RIGESHYFALQAHLRKMISQTIFSVSNDETRFFMNGVFM EKLPDGELAMIATDGRRLAF  
ISTQEADIPDFQSAIIPPKVLSVILKRASDEGQILMAVNEKNVFFRFGNYQLTSYLIEGK  
FPNYQKVIPKDQHFKFIVARDELQAALRRVSLFVEKSNKVIFNVSSKGLVLESEETELGA  
AREELSCEYEGDDVVILLSLRYLEDPLKAMDSDNLAIEFSDPSRAITLRPEPDSSYFHII  
MPMQQP\*

>SPBDM4\_v1\_40878|ID:27158183|recF| DNA replication and repair protein RecF [Uncultured spirochete bdmA 4]

MAFEQIRIARFRNIEETELKLGAGNIFLLGENGQGKTNFLEALYCLSYGNSFRTHQDREL  
PMHGNSEFLRAAWSELNSPAQEQISLRY SIEGRKEVRLNEKPLTDRKELVAHNPAVVFC  
HEDLAFAAGVPEERRFFFDQCAGMLWLEYIDLLRFYRRVLKHRNMALKTDTFSILD TLDE  
QLAHYGQEIMAYRKKLSQLFAQRFPESYERVSRLGTEVAIHVSSWP EEASVSEIIEVLA  
ERRSKDIEAATSLSGPHRDRWIFIREGRNFSTFASTGQLRLASLILRIVQVHLYAELSGS  
EMHRFPVLLDLDVLELDVAKRRRFFSLLPEQKSGAQA VFTFLPEEPWHEYADDTTIVYR  
VSDGRFSREEGL\*

>SPBDM4\_v1\_40879|ID:27158184| protein of unknown function [Uncultured spirochete bdmA 4]

MDDFRAKKASEILSRFFDDTTLQAATQFEMFRSTWKQIVGQRLADHSKPKSILHRTLLIS  
ADHAGWIQLLQLDQERILARIAKHYPELEITSLAFTVEEQGDVLP AEALPSAEPATKASA  
AADNGPEATSKEAQSGPEMKTPLPEPLEEIFLRMQRARVSTRRTKGN\*

>SPBDM4\_v1\_40880|ID:27158185| protein of unknown function [Uncultured spirochete bdmA 4]

LTKDTIAVYTPPPDCAIFRLQSKKFGGPMQPFVTRRMDHETHLSAEPS\*

>SPBDM4\_v1\_40881|ID:27158186| protein of unknown function [Uncultured spirochete bdmA 4]

MNDIFEQQTNSKEDRRRTILAVVLSTLIVSVGF MVQNALFPPSEQQTTQAPAQTSSQGTE  
LPAQNNQTLPGAVAIVPAPVPVQAMGTAAGSTIPVPAEQEYIVETDVVRAFTNAGGEL  
VSLTLKKHKDMSDSRGGVDMVVPGSQGSEGLSLSFGSTPSPMRELMNTQYLG ENKNTIAF  
SRMFEAPLAGSDQKVPFVLKKIFSNDGEYMFGLAVSIEQPDGKPIVLG SNGIAYRIDLG  
PQIGPRFDQLPKNADFRKYIAEVDGKKKTESPKANTATVIAPSASWLSLSGKYFAFIAVP

KAPLSGYEIETNQDPLIKQTNTLGLLRSSFAGASTTDTYYFYFGPKTSGELGKYE\*

>SPBDM4\_v1\_40882|ID:27158187| membrane protein of unknown function [Uncultured spirochete bdmA 4]

MEGSGIFGWLENFLKLLNLFYSIIPNYGVAILVTIVIKALFFPLTKKSSFATARMAEI  
QPKMQELQTKYKNNPQKLNQEMAELYKREYNPMMSGCLPMLIQFPLFIAMYNLFNNHFDL  
RGAMFIHGWITDLSLPESIINFGNFRMPIVGNWDLRALPIIYVLSQFLYGKFTQTPQSAQ  
MDSQQANQMKLMTYGMPLMFFFILYDVPSSGLLIYWITNNILTIAQQVVINDLMKKHKIAR  
AEVAVAGGPAGSAAAGAPSKLAGGKSSAVDTKAKPTGRSAPKEGFSEKVTKWLEEKAGEA  
EKAGKSGSAGKSGSAGKRGGSGSSKASRSRKNSPKQ\*

>SPBDM4\_v1\_40883|ID:27158188| Single-stranded nucleic acid binding R3H domain-containing protein [Uncultured spirochete bdmA 4]

MIYEFEGKTEREAIELAAQELGLDTSSFDVEIENQGGGLFKKGKVRIRVHTKDSPIPIA  
REETETKGEASEQRQVEPIPMDDFERKIVEWTKEVITRMGYTAELSVAFREPNKLGLRID  
TESASILIGKKGRNIDALQLLANVYAGTLGHNDIKVVLDSENYRLRREEALVRIA YETA  
EVRRTGRSILLEPMNPFERRIHTTLNDIIDITKSEGEGLMKQVRVMMKGRK\*

>SPBDM4\_v1\_40884|ID:27158189| rnfC| Electron transport complex protein RnfC [Uncultured spirochete bdmA 4]

MSIRTFRGGVHPPERKDRSQGTPIERVTSVPQVVIPVNHQFGAPIQPLVKVGEYVKAGQK  
VADAEGRMTVPVHASVAGVVKKIEPRMQSNTEGLCIVIEPKDPPEGESAQDYMLPLDPF  
ACSKEEALARIRAAGIVGMGGAGFPAHVKLAPTKPISYVIANAAECEPYLTIDERALLEI  
PEKVVDGVVIVMKTVNAPEGVIAIEENKKHAIPYVQKAIDENPQVKAGMKIRIQELRTKY  
PQGGEKMLITAITGRQVPSGGLPMDVGCVVSNVGTLCIAIAEAFREGKPLIERGFTVTGGA  
CKTPKNLVAPVGTLVSDLAKAGIVEIDDQSLGKVFVGGPMMGVALPSYEIPVQKNTSGVL  
LMSEQEA VQYEEEDTCIRCGRCIRACPTSIFALLAIAIESGNYAEAEKIGLMDCIECGTC  
SFVCPAHRHLVQRFRVGKQVLRALKQKEAQNVR\*

>SPBDM4\_v1\_40885|ID:27158190| Electron transport complex, RnfABCDGE type, D subunit [Uncultured spirochete bdmA 4]

MSDRKMRLSSSPHAFSPVDTPRIMLSVVIALMPATAYGVYLYGLPALGVVVTISIAAAVLS  
EFLFRKIIKASTTVGDFSAVVRGLLLALILPPSTPLWMVALGAIFAIVVAKEFFGGLGAN  
PFNPALIGRAFLLMSFPAAITSWTMPKGLSLAADA VSAATPLNLLKQGNALTDVAKYFGA  
NDTGAFYRQLFMGFRSGSIGESSILLVLLGGLFLLAIGVIQWVPLSVLASTFVFSWILG  
MDPVLGLLTGGIVFGAFFMATDYATRPMTPYGQAIFGIGLITVLIRKYGGYPEGVTYA  
ILIMNTLTPFLNKLRMKKYGFVPPP KPARPSKEATK\*

>SPBDM4\_v1\_40886|ID:27158191| Electron transport complex, rnfabcdGe type, g subunit [Uncultured spirochete bdmA 4]

MKKDMMTKLGVTLMLFASLACASLAVVYAFTKESIDKQSEIQLQASLKELFPQATAFEPIQ  
DLVSPDPNIKFEAA YE VKSDMAPLGLAMKATGPSYGG AATLLVGIDLHRSIAGVRVMALN  
DTPGLGMNASSPTYVVDKTKKVTF LGQFNEKFL TDPFEVKKDVVAITAATISSRSLTKII  
KLAGDAAIAYMDQKAISAPAENGASADAGTDANAQPQAGGK\*

>SPBDM4\_v1\_40887|ID:27158192| Electron transport complex subunit E [Uncultured spirochete bdmA 4]

MKKLYSIFKQGIIFDNPLLMLMIGLCSAIAVTTNVSNGIGMGLAMTFVLLFSEIISLFR  
KLIPSMIRIPIFIIVIAAFTTMVDLVMKAYFPDLSKSMGVFIPLIVVNCIIMGRVEAFAS  
KQNLASVIADALGMGLGYTWVLI AIAAVRELLGNGTLAGIQIMPASYQPILFFILPPGGF  
FVFSLFISLNIWFKKRMEASARNREL VAKKEAA\*

>SPBDM4\_v1\_40888|ID:27158193| putative inner membrane subunit of an electron transport system (fragment) [Uncultured spirochete bdmA 4]

MMELGKIFLLALLTNNIVIMRFLALCSYIGMTSDVGQSIGMGFAVTFVTVLATAATWPIY  
HYILVPLNLTFLQILIFILVIASLVQLVEFYLLKKNVPGLYSAMGIYLPLITTN\*

>SPBDM4\_v1\_40889|ID:27158194| Electron transport complex, RnfABCDGE type, B subunit [Uncultured spirochete bdmA 4]

MIETILLTIGFSAVLAFFIGIALAFFS QKFKVERDPKIDEVRGALPGANCGACGFP GCDG  
YSEAVATGRAPTTKCSVGG SATAETLAKIMGIEGGAEDRVAVLLCQGTVNKT VSKGQYS  
GIPTCRAAKLSTG SVKTC AWSCQGF GDCTKVCKFDALAMEEDGLPHVNYDNCTGCGLCVE  
ECPQKILTLPVTRVGSIVLCSNRSTVKASVIKTCKVGCICELCVKSCPEGAITMVNGI  
PVTDYAKCTSCGICVQKCPTKCYKMLETDVFGTKKEVPVVEEAQA\*

>SPBDM4\_v1\_40890|ID:27158195| protein of unknown function [Uncultured spirochete bdmA 4]

MFVQMLSDNVDMGACHVRVGGWPGGHRRLTSVCFLLFLALAFQPAFGVVSAPPLLGLAS  
SSARQSVLNAAESYLGVPYRFGGSTKSGIDCSGLVYVSYLQATGIKIPRTVDTLARWSLV  
IPVGELEPGDLVFFDLQAKGGASSAQAPTSVSQAASFLSKADHVGIIYIGDGGFFIHAASSG  
PHTGVIQSSFNDEWKQRLLFAGRALPTSTLSGFAFDWGASVSFAQLETLEGGPLAFVRG  
LSGWGEVSFPLSKNFSAGLRAGADWDRLGVVRVPVELDIGQISGFSVFAGPALTLGSPD  
MDGRLYSPGDFFIATGGLRWSPLFFSSGAQRFGTYFELRYDYYVPAEQTEAPQTDLRSC  
LNFSIGIRLRTVKY\*

>SPBDM4\_v1\_40891|ID:27158196|metK| methionine adenosyltransferase 1 [Uncultured spirochete bdmA 4]

MTQPLLRPFTSESVSEGHDPKVCDAVLDACLAQKDKHSHVACECFATTGMVLVGGEI  
TTRTYVDIQEVARSVVREIGYDNPDYGLDWKSMVAVLNTHNQSPDIAQGVVEGRGLKEYEG  
RQGAGDQGMFMFGFACNETPELMPTPIFAHKLLQKASALRKAKEISWMRPDGKSQVTVEY  
DGYKPVRIASVLAQQHDEKNGSGHYLTYEEIRETLIEKVIKPVLPVGLPSGLLDDNTKYFIN  
PTGRFVIGGPAGDTGLTGRKIIVDTYGGMGRHGGGAFSGKDPSKVDRSAAVMARHIAKNV  
VAAGLADRCELAYAIGVPEPISVLIDTFGTEKVEETAIEQAILKVFDLTPQGIVEALQ  
LKNPIYRATAAYGHFGRDNFSWEKTDKVEALRKAIR\*

>SPBDM4\_v1\_40892|ID:27158197| conserved protein of unknown function [Uncultured spirochete bdmA 4]

MMIDTIRGAIASINGQDAVKISDWRLVERKLQLQERYYIAAKAEQARVVDECSYSLTVYV  
DTHEDNKQYRGEATITIQPTFSLEDCTAKIRQAVFAASKSHNPWFGLTPSALKVTLPVS  
GFEALSPSDQVEVVRKAFYSAAVPFAGSARINALELFIIEKQKRLINSCGVDYSATIWRG  
YSEFVVEADSPNGPVVELFDDIEFSEPDTARLADTISARLAQVRDRAHAAPMPTLQGLSVI  
LRGKEAEEVFGWFFHNSRTEMIYSKASAFGLGKNVQKASDSEEVAEPLDIWAEPVISGLP  
SSAAFIDIDGFPLERTTVIEKGVNLTLIGSVRHADWLGVPRKGAFFLFSVSSGMSMSLEAMH  
AAPYLEPVMFSDFLDPTGDFGAEVRLAYYFDGEKVIPVSGGSISGSLGALRASMRSA  
ETAVALSRCPVAIMLQGAITGMN\*

>SPBDM4\_v1\_40893|ID:27158198| TldD/PmbA family protein [Uncultured spirochete bdmA 4]

MQKRSHSPFLAAKPLAKIVGHLRPHFDYISVLATDDRGLSYFALPGETRTAEPMWVQR  
GFVFRAQRDQKVAEYACAVLPGDSAACAADIRARLEALLTDPTLITFPQIPDEPATSEY  
LGEIEEDPFAANPEAILRLAALREKLTGKVVVMAQSRYECVDVSRLFLSPNRSMLQSF  
LWSQAYLFGVARRGQMSKMSYRPASGRKGLEILRTLSETSPELARELSDLLDAVMEPEGE  
YEVILDPDMAGTLAHEAFGHGVETDMFFKRRARAVEYLGKRVGSDLVTMYDGAAGVDQTG  
SYLFDDEGVFSSKTCVIEKGIFKSGISDTLSALALKIPRTGNRREA YSHKAYARMTNTY  
FAPGASSLGDMIASVKHGWKLSQLNSGMEDPRNWGIQLICMVGREIKDGKFTGRVASPIV  
CSGYVPDVL SAVSMVSSDFELGGSGACGKGHKEYAKVSSGGPPYVKTRMRLG\*

>SPBDM4\_v1\_40894|ID:27158199| Type II pantothenate kinase (Pantothenic acid kinase)(PanK-II) [Uncultured spirochete bdmA 4]

MTIGIDIGSTTTKAIIVDHEDIIKAKTRAEDPLTAATGIIGKITQENNLHINDIKKIIV  
TGVGSSGIKNNIFDIETERIDEISAIGRGGVFLAGIDPIMIVNIGTGTVIVEYDHGESRH  
FGSGVGGGTIIGLSKALLNITGFSEIMDLASKGDASRVLDLQIQDIVSETISFLGKDATA  
ANFGKMEEGASREDIASALINM VYQVIGMLAVFAGRAEKMDKVILTGNNGSNMLGRKVLE  
AITAMYGIEFIYTQDAEYATAIGAALS NYPHHVITYKVS\*

>SPBDM4\_v1\_40895|ID:27158200| PilT protein domain protein [Uncultured spirochete bdmA 4]

MFYLDNTNTCIYFLNGTCASIKKIMETPPSEIAIPSVVKAELLFGAYKSKRKKENIEKIE  
QFLEPFIEVPFDEVMTYVYADIRYNMEMKGTLIGPNDLFIAAIVKFFHEGILITNNEKEFK  
RLEGLKVENWIE\*

>SPBDM4\_v1\_40896|ID:27158201| conserved protein of unknown function [Uncultured spirochete bdmA 4]

MPQISLYIDDKTLKKVQNAAKQHHTSISKWVAEQLKMKVDPSYP AHFEELFGSIKDITFK  
EPEEIHLSADLPRESL\*

>SPBDM4\_v1\_40897|ID:27158202|lpd| Dihydrolipoyl dehydrogenase [Uncultured spirochete bdmA 4]

MYDFNLLVIGAGPGGYEAAIRASQLGLKVAIVDKQWLGGVCLNVGCVPSKALLKNAEVAY  
TLRERGKEFGFSFDNLNLDYAAAVRRSRQVSDRLTRGVGFLMKKNIAVHMGAARLLDKN  
TVEITDKTGQVQRVSAENILIATGSQPTMPPAFPVDGEKVLTYREAILQEKLPTSVVIIG  
AGAIGLEFATIWSAYGTEVTLVEMLPRIAPLEDEEVSAELTNAFNKRGIKTLTGTRVLAI  
RTTEAGVKVSVAGPNGEQTLEAEQALVAIGFKPNTANLGLEAIGVALTEKHFIQVDDRMA  
TNIPGIWAIGDVTGKLLLAHVASAQILCAEAMAGKATKPIDYSMVPRATYSQPQVASFG



LTEAQVREKGLAYKVGKFPFMANGKALGLSDSGGFAKLLTESQTGEILGAHLIGPEVSEL  
 LGELTLAWQNELTVTEIGRNIHAHPTLSEVVMEAAENAEGRAINI\*  
 >SPBDM4\_v1\_40898|ID:27158203|acoC| Dihydrolipoyllysine-residue acetyltransferase component of acetoin cleaving  
 system [Uncultured spirochete bdmA 4]  
 LATEILLPQWAMGLMEGTVAHWLKA VGDYVETGEPLAEVEEAKVTGEVSAPAAGYLLKIL  
 VQEGETVPPVRSPICLIGTKEELQAQAQTPQETSQTTSPTAASAAPSPALTKTPEAQPGG  
 SKQVTPIARKLAAEYKLDLSTIQGSGPGGRITEADVQRQAYAMHGASKETEIPLAGMRGAV  
 AQRMAESLHNSAQLTITMQADVTELLRQREALKGSEKSN TAESGGGAVNVTLTDVIKAT  
 TLTLKKHPRNLGWVEKEKIRLPSEIHGLAVALDEGLIVPVIRNADRKTREIAVESKQL  
 AQKARNKALTPDEFSTFTITNLGTYGVGFFTPINPPEIAILGVGAVNDCPVSQNDVL  
 AWRKMLPLSLTIDHRAIDGAPAAAFLRDLKDCLEHLDLQTL\*  
 >SPBDM4\_v1\_40899|ID:27158204|acoB| Acetoin:2,6-dichlorophenolindophenol oxidoreductase subunit beta  
 [Uncultured spirochete bdmA 4]  
 MHEITYLQSIDEAQREEMKRDSRVFVMGEGVAHGVMGTSVGFLEKFGKERVDRTPISESG  
 FTGVGIGAALVGMRPVDFTIASFVYVAMDQLISMAAKCTYLYGGQAKVPIVFRACMYYG  
 VSNAAQHSDRPYPIFMGVPGFKIIPSTPYDMKGLLKT AIRDDDPVISFEDINLWGIKGT  
 VPDEYDITIPFGQADV KRKGTDTVVAIFSGVPMALAADELAQEGVSVEVVDPRTLVPLD  
 KAAILESVKKTGRLVVVDPAHKTCVASEISSIVAEEGFWSLKAPIQRVTDDIQVPFST  
 ALEPQIYPSKEKIIAAVHKTLLQ\*  
 >SPBDM4\_v1\_40900|ID:27158205|acoA| Acetoin:2,6-dichlorophenolindophenol oxidoreductase subunit alpha  
 [Uncultured spirochete bdmA 4]  
 MNLTNEQLIEMQRRMLRSRRFEEKVRDLVAKGELPGA AHL SIGEEGEIVGACMALRPDDY  
 EMGTHRSHGHPIGKASL KPLMAELLGRETGVNHGKSGSMHLADFSVGLGETSIVGSL  
 PAAAGAALGAKMQGTGRVCLCFDGDGASNQGT FHEALNLAAIWKLPIYLCENNGYAMTT  
 AASYSVSVKNIAERAKGYDIPGVVVDGQDPIAVYEVVSQAAERARAGLGPTLIEAKTYRY  
 REHAEGAMFEALAKSLGYRSDEEYERWLKRDPIVLFRAKLIESGVLTEAQADQLDQEVQE  
 EVLAAEAFKASPYPEAHEAYEGLYTNPISA\*  
 >SPBDM4\_v1\_40901|ID:27158206| NADH oxidase [Uncultured spirochete bdmA 4]  
 MDFSMSMSPIKIGTMEVKNRFVVPAMGTNFANPDSSVSQQLIDYHVTRAKGGYGLIIVEV  
 TAIDPLGKAIPFEPGIWDDSFIPGWKKLADDEVH KYGCKIAVQLHHAGRQTTSGLGNGQP  
 VAPSPICPVDKEMPREL TTEEVYELIEKFGNGARRARDAGIDAVEVHGAHGYLVAQFMS  
 AYSNKRMD EFGNLSARMKFPVEIVKNIRKGTNGYPIIFRMSGDERVPGGRTIDESRAV  
 ARIMEEAGVNAVHVSTGVYGSIAWIIPPAAVPTGFNL YAAEEIKKSVSPVIGVGRINDP  
 LLAEDALRTGKADMIALGRASLADPEFPNKVASGELESISPCIGCIGCYIFDPNHGK  
 TSCLVNPVFGKEGEMKIEKTNKPKKVMVVGGGPGGMEAAWIAAKRGHRVTLYEKEKILGG  
 QFRIGAISPTKQEV LKSLRYLYEYEGEKYGVFEKGTGVEVSPDLVKA EKPVDVILATGGVPL  
 VPHIKGVDNHGIVRAIDVLE GKVTVGEKVLIVGGGMVGVETADFLGEHGHKVTVM DMLPG  
 IGMDEEAAVKVFLFERLKNYGVASITNATVKEFLDGGVVYEKDGKEEKIQGFDTIMMALG  
 VKSYNPLEKEIKGVPEVYVIGDAVKPRKALEAIAEA ASTAVKL\*  
 >SPBDM4\_v1\_40902|ID:27158207| conserved protein of unknown function [Uncultured spirochete bdmA 4]  
 MEELFRTLGMNDNERDVYLSVIKAGKISANQVAKETGINRTTVYSIAKKLEKMGVLAFDL  
 GQKVGYLVAIPPENLV TIFEKEEKKLA EKKQVAIELAKELSSLTHDKRYSVPRIRFVEED  
 DLEEYLYAVYPRWESSNSDNVWWGFEDDSFTTCY EKWIKWGWHRPNEGLRVELFFNEA  
 QIEKQLTKEYSGRKMKTLPNHISFDSTLWIVGEYLMVQTRSRPHYLVEIHDPVLARNQR  
 ELFKGLWALAPELSCT\*  
 >SPBDM4\_v1\_40903|ID:27158208| conserved protein of unknown function [Uncultured spirochete bdmA 4]  
 MPEFASAFSGQKSDRKLTHQELVRAIRYMIAAEYEA IQLYTQLAESIDNKLASEVLEDIA  
 NEERVHAGEFLRLLRELAPDEAKFYAEGAGEVEEEIEKFGKSS\*  
 >SPBDM4\_v1\_40904|ID:27158209|cobB| NAD-dependent protein deacylase [Uncultured spirochete bdmA 4]  
 MRHIVFLSGAGISAESGISTFRDAGGLWDTYNVMDVCSAEAFRRNRQFVLEFYNKRRREL  
 ADKTPNAAHRMVADIQREFPDRVLNITQNIDDLFEKAGCEGTIHLHGELTKARCEVCGNI  
 WDIGYADLVGTELCPRCGASRVRRHHVVMFNEQAPEYMRLYESLDELHANRGMLVVIGTSG  
 LVLVPEEFARYASYSVLNNLEPQAAIDDRVFSVRLYEKAGTAAPKIAELARRFLDSDQRG  
 PRDGRAETAS\*

>SPBDM4\_v1\_40905|ID:27158210|gluT| glutamate and aspartate transporter subunit ; ATP-binding component of ABC superfamily [Uncultured spirochete bdmA 4]

VEKYIEIIDAVKNFDSVKALQGVSVITVKKSEVVLIIGPSGSGKSTLLRSVNRLERLDSGR  
IFIDGESVTDADADIRHIREEVGMVVFQSFNLFPHITVLDNITLAPICVLKKNKDEAIDSA  
RKLAKVGLSDKEKAWPEQLSGGQQQRVAIARALAMNPKVMLFDEPTSALDPEMIKEVLD  
VMTELAREGMTMLVVSHEMGFARAAAHRIFMDAGQIVVEAPPDTFFTSPREERTRKFLE  
HIL\*

>SPBDM4\_v1\_40906|ID:27158211| Polar amino acid ABC transporter, inner membrane subunit [Uncultured spirochete bdmA 4]

MMKGSFSDRNSKNSDKTTINVTDGTLIPLKDEGSLLSAWNISFFGAIALLLILPVLSPD  
PYRRILSFVPDGLIATFSVTLISIFFALLIGLFAGLGRISQKRFVNRIATVYVEIVRGIP  
LLVQLFYIYYALGPLLKLNGPAAAVVAMSICYGAYMAEIFRAGLQAVPRGQMEAAALALGM  
SRSMAMRKIIIPQTIRIILPPIGNEFIALLKDSSLVLSILAVSDLLRRGREYASTSFRYFE  
SYTVIALIYLVMTLFFSRLVAMMEEKLRHRGKVVH\*

>SPBDM4\_v1\_40907|ID:27158212| ABC-type transporter, periplasmic subunit family 3 [Uncultured spirochete bdmA 4]

MKKFWSVLTSTVTLVAIVALGAVSLFSCAKKPAQITVATDATWPPMEYVDENKNIVGFDID  
LVNEIAKAENFKVEIKNTAWDGIFAGLAAGNYQVIASSVTITDERKNTMDFSDPYVNAGQ  
VLVVRKDTTGVTTLADLVGRKAGA QIGTTGAIIEIGKVQGVELKTYDEVGLAFEDLVNGNI  
DGVVADSPIAANFALQNTATYKEKLMIVGQPFTDEWLGFAFKKGDTKTQKLFNDGLAKVKS  
SGKLDLKKKWLQ\*

>SPBDM4\_v1\_40908|ID:27158213| conserved protein of unknown function [Uncultured spirochete bdmA 4]

MNSKHAWQIDRELRLSAVPLDRRTHQSNWYTSETTFPVGDDLIALFWFSSVPGSGAPEIP  
YLEMVQAMGNKGYDVSAERLLYEGMEEARKCGILDRARFGSRESDAQAQANFEQPAYPG  
SRENATARAPNPAVSPELRALTAELLHEIHCAPRDP SHPYWNYVHPAEWEAVRAEMPAAE  
TSVGRRGAVPESSAIESPAAQRPLPDNPEARIHAGWLGQLAGGAFGTAEIYHSAQLQK  
VYGRIDAYITDPETVNDVYELAFDAFERCGRDITSRDIGREWVKQIPFGWSAEWVAL  
HNMAEGLPPESGSWHNPYSDWIGAQMGRGMVCLVAPARPMEEARLAHIDGVVSHAENG  
YGEMYAAVLTALAFTEGEPRALLREAAARFIPKRSEYAAILEKCIDTAARARSAEAAWDIL  
DKYFERYNWIHAYPNIAAGITALWFGNGDMTESFRILAHAGLDVDCNAGLVGTVLGIMGG  
VPEKWAQPLHDTLETYLAGKERLGIRELAARTARLAL\*

>SPBDM4\_v1\_40909|ID:27158214| putative ABC transporter permease protein [Uncultured spirochete bdmA 4]

MNIIVGLITGMISGATPILLAALGGAFTFYAGIFNIAMEGMMLMAAFFAVLGSFLFHSWL  
VGLLFAIAGAMILALIFIFFSVTLNTDEFVTGIALNLFALGSTTYLLRQIFKVKGVFTSK  
LIDSIPNIHFPLIEKIPLLPVSGRNLIVYLA VIATIFCYL VFKTRFGLRLRAAGYNP  
NSLDSSGVRTSRMRIQSLLCVFCGLAGAFSLGYVTLFAENMTAGRGWISLAAIILVD  
GHPYGIALLISLLFGFFDGLGLFLQGYGVSSQFTSMVPYIATLGALYVYARRNRERERNA  
L\*

>SPBDM4\_v1\_40910|ID:27158215| putative ABC transporter permease protein [Uncultured spirochete bdmA 4]

MTRRILSGVLGVVIALVVGAIIMLIEGYEPLATYGALAQFSLGGIGPLTTTLKNSVPLVL  
TGLSAAIAFASGPVNLGQPGQLVFGALAA TLGGLYISLPPVLEIPLLLLLLAIAGGALWSG  
LAGLMKQAFGMSEFIVTLMNMIADFFTAWVIA YPLMDRKA FSPMTPPIARSGWMPDIGP  
LNSSVLLMLAAVVVMWFVFRWRAGYEWRTGQNSL FARLGGCDVRGNFMAVMLVTGALA  
GLAGGLVVMGGPHRFLKGLGANYAWDGIMIAIMANGLVETLIYGVFVAAIQTGALGMEL  
ITNVPSEIAQVLQAVLVIVATREYAAVFDRLAARRQARERAA\*

>SPBDM4\_v1\_40911|ID:27158216|tsuD| Glucose import ATP-binding protein TsgD13 [Uncultured spirochete bdmA 4]

MDDFISLEHMVKVYPPRVLAVDNVS VGFQKGEIHSIVGENGAGKSTLMKLLYGLVPFDSG  
VVKINGAAVHFRKPGDAIAMGIGMVHQEIELISQYTVWENVVLGAEPVRRGGIGGTLD SAR  
AIELVRRKIDEFQFNLDPSAQVERISVAALQKVEILKLLYRNVS VLILDEPTSVLTPQEI  
PQLFAELKRLRDKDTTILFISHRLDEVLELSDRITVMRKGKKIATVAASETNKEALA QMM  
VGRQVIFTSKRTPHPRGDRVFEAKGLSVTRHDGLKLLDNVSFSVHAGEIVGIAGVEGNGQ  
FELVNSVMGLAAPTSGSITVNGGEITKLPILERRKLISFVPQDRARMGASLAASILDNAI  
MTHHRLEPSFSAWRGLVLNRYRNARAFTDTLAKRFSVQMASRQSPFRSLSGGNQKLLIGR

EFLSTPFFLMDQPTRGLDVGSI EYVHGEILSMREANRAVLLISADLEELFLIADRILVM  
HRGRIVADLVAEQTNIEEVGRYMLEGKITA\*

>SPBDM4\_v1\_40912|ID:27158217| putative basic membrane lipoprotein [Uncultured spirochete bdmA 4]  
MKGRKYFAVIAAVMFLAAAMSAFGAGPSVKTDRVVYLINGALGDNAFYDSGEAGVKNIEK  
NYKLQTRTIECNFDDAAKFQPALDAAVQYADVIFVISYGFEDQLKAIADKYPNKIFVNIDT  
IVENPKHTITSVFFIAEQSSYLAGMTAALATTTTSLKGINKDKVIGVVGGDTPIVSAFV  
FGFQNGAKAVDPGIKVLAKSLGGAWDDSAK GKQAALQLYDQKADV VYQVASAAGIGVLQA  
AAERGLYAIGVDTNQNLDLEPGHVIASAVKNVGATIEEVFKTIKDGTYKAGEVINADLASG  
GIDLVFDAKQQVLPKSLVDKVNAARQQIIDGKLVQLYNGENVWQQ\*

>SPBDM4\_v1\_40913|ID:27158218| putative AraC family transcriptional regulator [Uncultured spirochete bdmA 4]  
MNPVREIVYATPGYSFCIQYFDDRRLHFNWHYHEDIELVLIKKGEGQIHIGDLVKYYKAP  
AGFLIGPSLPHGLLSIGSLQGWIIFQEKQIKYPNAPSEFTNITNAISESKKGLSFSPPV  
ITGCLPLMDDLNGSNGLEKWL LLLKVLNTLSQDKSRELCSLLPHNQDVQTD RFEQAITQI  
FNEIDKTYNLEEVS R KVG MKVSSFC KTFKKRYGLSFIEYIHSIRINNAKLLIQTKFYID  
DICYESGFNNV SFFNRKFKEATGLTPSGYRKRYKEA\*

>SPBDM4\_v1\_40914|ID:27158219| conserved protein of unknown function [Uncultured spirochete bdmA 4]  
MAASTEPIQSVLVGAGNRGAEVYGQFALTHPWLFRFTAIADPNPARRTKFSRQHGISETR  
SADSWERLLDIARPSDLVFCISPRDFHYEQVLA FMEKGCPIVLEKPVVVNPRQCATVSKQ  
ASEKSARIIVCHVLRYPFFSTLKKVLDEGRIGRAVSFNLQENIAWYHFAHSYVRGNWRN  
TALSSPSILAKSVHDL DILYWL AGAPAESL VSMGGLRWFREENAPAGAPERCLQGCPHAS  
ACPWYAPDLYLTENTDWPTSVISDDKSLAARRRALEEGPYGRCVYRCDNDVADHQDVLIR  
FRNGVSASF MNALTYDKTRVIQVTGSEGEIIGDLDGGWLEVRGFLRGERERIQIGAAVG  
GHNGGDVGLMHDVARIFHNAVDAAGAFKSKSSIEASLEGHWMAFAAEESREKGILVDLDA  
YRNNVVSTRETVNI\*

>SPBDM4\_v1\_40915|ID:27158220| putative Extracellular solute-binding protein family 1 [Uncultured spirochete bdmA 4]  
MTKSRKTIIAAFLLLIGLVSPFFVMAQGSQKGEKIKIVSQMFYDPAQQQYIKEQILPKFT  
AETGIEVELQVVANASELYKVLQAQQQTGKWSTDILIAHDSTAVPVVQEYHAVQAYTKIP  
AGTYITQFDDNFVQGGKRYFVPLQADVYLTIANKKALPYLQKLG YDINNLTWEQLAEWVR  
LIKKETGLPKYVFPALAGKFATYEFNSVQLSYGDKYVPAFNTPASQA AFKVIASMKDGIL  
PSSPTIDFPTASLATEEAWITVFHQAYANASFSQAPDKFVVAPVPIGASGKRGTIIGGHG  
IGIVTGSTHKAAA EK FVEFFLRDDILYAVMKNTGPWIPSKAEITSKLKDDPSDQIMKMGL  
ATLTGPTLIDRVRVAEYQDWGQVKRLYEQVIGDILAGKDINKQYLDQKQKELES LKVE\*

>SPBDM4\_v1\_40916|ID:27158221| conserved membrane protein of unknown function [Uncultured spirochete bdmA 4]  
MHVSRRTGFFKSPTWFLVPVVIYYAAFWIRPTISVIIESFTDKAGAFSFSNYVRLFSQEA  
IRTAFLNTVLFTVGS AIIQFVLA FALALWLNKKFRFSNLVLFITLIPMAFPPAAVGILWK  
TGLYRFGWINSFLCAIGLMNPANPVDWMSFRNLNAVMLLIVVDTWTVLPSVMIILLAGLQ  
NFNKEFEEAGWVFGANKFQTLKDIVFPIMKPTIITAMILRMIAAVQVWLIAVMIFGYNVV  
PFLVERIAYNVDVITLAKYARKDAYTISVIVA AIVLISVSMYLRVSGDKQKGGETT\*

>SPBDM4\_v1\_40917|ID:27158222| ABC transporter permease [Uncultured spirochete bdmA 4]  
MSVRRGKLWSRTVFL LILATVAGVLLPVFYFLTISFASNYEAYQFPAKIFPTFSYPAQL  
RYNADKENYTLLIKKGADFEAVKTTSDTSDFSLYCKSQLNVLIASSEVQALFDKAKGADH  
APIKLLKKAFFRN YVFFILAEGTMRALFNSLKAAGWTILISLVLGGVTGYILARYKFRF  
SNTFSTGLLVVRMFPAVALSLPLVYIVRMNL YDTPFALAI VYSVPNIALTAWITSSIFK  
GISVELEEAAMVFGATR LKTLTITFPLAFP AIVASSLYAFLAAW NDSITALIMTNDNPT  
LALLVYRTVGSSTIPNLPAAGAVVLLVPSLVFTFIKKNYINQLWGNVAL\*

>SPBDM4\_v1\_40918|ID:27158223|ugpC| sn-glycerol-3-phosphate import ATP-binding protein UgpC [Uncultured spirochete bdmA 4]  
VSYLELNSLKKTYPNGVTA VKDIDLEIEKGEFVLLGPSGCGKTTTLRMLAGLEEVTEGS  
IILDGKDITHLPPRQRDISMIFQSYAVWPHMTVAENIAYPLKLRKMDKQAI AAKVQEVAK  
ICKIVDYLNRYPAQLSGGQRQ R VAVARALAVNSKLSLMDEPLSNLDAKLRVSVRTFLKEI  
HRNTGATTIFVTHDQAEAMALADRIVVMNEGRIEQVGSTREIYNECESLFTVQFMGTPPA  
NIQKVALASSQGR LVAAAGGGEGAMSLDLGDQSAFPGIERLMGEEVFLAVRPENIGIGEP

NGINETSIEIVEPQGAYTILVTNVLGGGEWKIMLEGDVDIRIGQKVSLEIDPGKVMLYDTQ  
NKKRISLT\*

>SPBDM4\_v1\_40919|ID:27158224| conserved protein of unknown function [Uncultured spirochete bdmA 4]  
MRTQQAWIERCSEVLRGNLPDQKVLEKLLYRYTTPAREKGTYPQLWWDSCFHAMAYRWF  
DPDMAWEELQSLFVHQFGEQPDAGMVPHMSHLEESGALAAQRLFRHKDCSTITQPPLISV  
AARAVHRKAPDKSILAKLYPKLRAYHDWFDRRRDDHDNLVAIVHPWESGWDASQRWDGL  
MGLDALGAGALRALEQKRNDLVSVCAVHGYDAEVLAQVPDAFYAEPADFNIRAADLLAL  
AEIADELKPKSESRELEARARAVQRAVHDKMVSFGDGELRAHDLLGPAEEKSPTDHAGKF  
VLMFGHCLLQAEADALSSSELPAGAYATPYKVA STSRFDPLFDPKEYWRGNVWLSLNWL  
VWKGLLAYGQEGAAAAMVRDSLALVEKSGFCEFFNPLTGEAGEKYGRICPRNQSWSTIIL  
DMLQGTTE\*

>SPBDM4\_v1\_40920|ID:27158225| putative sucrose phosphorylase (Sucroseglucosyltransferase) [Uncultured  
spirochete bdmA 4]  
MNESHLKKIADLLVFLYGREQGARTFKSLQRLIPRGLARGGPADHPEPLSEKDACLIAYG  
DILSLPFDESSNGNEAPRSSAAASMPALARLREFLEHRDHGGFSYLHILPFHPYSSDD  
GFSIIDYREIDPRLGNWGDIA SLAQEYKLVFDLVLNHGSVQSPWFQSFLKNEQSHRDWYI  
TKPADFDVSSVFRPRTQPLLTPFLREDGTTVYVWTTFSADQADYNFANPGVLLLEFIKIFF  
EYVRHGARMVRLDAVAYIWKEDGTSCIHHPKTHAIVKLLRALIDYLELDVLILTETNVPH  
EENLSYYGKGDEAHLVYNFALPPLVLHAAVSEDAGPLRDWARTLPAPGEGPVFFNFLASH  
DGVGVLPKGLIDDRSFQKTLDTVLERGSLLSYKDTKEGPVPEINCSYLSAVAPPSLGT  
VQERARAFLCCHAVLFALAGLPAVYFHSWIGSEQWTEGPRLYGYRRRAINREKPYIDQVEK  
ALSDEHSLRADVYAGFEKMLAFRRNEGPFAPQKILPAGGPVFALVRGPDRGGRYVLC  
LQNFGRPETCRLDEAPAFEMLVRGGMGREILLSPRETRWIGCGGSRNISVLRI\*

>SPBDM4\_v1\_40921|ID:27158226| Extracellular solute-binding protein family 5 [Uncultured spirochete bdmA 4]  
MKRKGMLVGLFLFMAIPLVMAGNIPKDTLVMAMNTEIFKTFDPGVCFEVEPSAFVKNIY  
ANLVTLDIKDGAFTPVGD LAEKWEQSADGKLWTFYLLKKGVKFANGDPVKASDVEYSYKRA  
VKLNKSPAWLFTDTLGLTEDSIKAVNDTTVTITNGAPANVVL SVLAANIGGVLNEKEVK  
AHETNGDMGLAWLTDHSAGAGPYVLKEWKRKTQIALTVNKNYYGDTPAIKTILLRDMPEA  
SDRYLSLKKGDVDVA YQITVEEAAGLRDNKDES VQLFTTPGQTLEYVAMNASWGPFKDAR  
VRQAVKYAIDYDAIINKVREGFAIKNQFLAIGYFGYKESNPFTRDVAKAKKLLADAGYP  
NGFEVEIVTNESEIRRAEAVVVQSNLADIGIKSNIIMQAAQMYDKYRNQGLQMIVAGWG  
IDYPDADALAKPFADYTVKQLAWRNAWLDDKAASMASAAGKEINEKKRAQIYYDLVKYWQ  
DNGPFAMMYQPIEFWGIGNDIKGFDKAFDGYNVHCDFTLISK\*

>SPBDM4\_v1\_40922|ID:27158227|ddpB| D-ala-D-ala transporter subunit ; membrane component of ABC superfamily  
[Uncultured spirochete bdmA 4]  
MELGSFIIKRLALMVLVIFGVLIIVFIVTRIIPADPVGAILGGNAPPATVDAMRHQLGLD  
KPIFAQLLDYLGGLLRGDLGTSLVSSRPVLT DILEFLPATIELAVSSIIFAVVLGIILGL  
LSAVFRNHFDHFSR VFSILGISLPGFWLGLLILIFYKLGWLPSSGGQYDMFLFPTRTT  
GLILLDAMIHGEWNVFWNGIKHLILPTFILGYSSTASIRIMRASMLDVLHQN YIRTARA  
KGLPRKMVILRHAKNALIPVITIIGLEFGSLLSGAVLTETIFAWPGLGRYIVNSLLTLD  
YPAVSGGTIFIALIYSVVNLAVDILYAAVDPRMRS\*

>SPBDM4\_v1\_40923|ID:27158228|ddpC| D-ala-D-ala transporter subunit ; membrane component of ABC superfamily  
[Uncultured spirochete bdmA 4]  
MKRTSSAAGYAKGSSWKKFLYERKPMMDMKHSVYLWKKTPLALIGTVIIVLFLLV ALFA  
PLLAPYDPIATDL SRKLEAPSA AHPGLDQFGRDVL SRVIMGTRIEVQIIFIISIT I  
GLIVGIVAGYFGGVIDEILMRITDIFLAF PRLVLAMAF AAALRPTLTNAIV AISLVEWTV  
YARLARAEAIKVRSQPYIEAIRALGASDFKIMFFHVL PMSISPVIVQLTMRMGTIILTAA  
SLGFLGLGAQPPLPEWGAIISDGRSYLMNNW WITAFPGMAIAITVLGFNLLGDGIRDILD  
PRIRR\*

>SPBDM4\_v1\_40924|ID:27158229|oppD| oligopeptide transporter subunit ; ATP-binding component of ABC  
superfamily [Uncultured spirochete bdmA 4]  
MQYRRGDLLDVS NLRVVFDTYAGQVKALNGVELWMNHGERLGVVGETGCGKSVTALSVMR  
LIEEPGRITEGSILFEDKDLATLSENILNTVRGKDIAMIFQEPVAALNPVMKVGAQIVEN  
IECQRKSAVLAQGARKAGPVTDSGLSQKHRTKETGSVEIMRDMLGRVGLDWQR TENLYPH

ELSGGMAQRVMIAMALSSKPKLLIADEPTSALDVTIQAQILNLLNLLVRETQTAVLLITH  
AMGVAAQFCDFIAVMYAGNVVEYGSVQSIFKNPLHPYTKGLLRAVPKIGRTDELQSIPGI  
VPDLISPPSGCRFHPRCPHRRPECDKNQPRFEPVREELEADRHHVACFLYQKDL\*

>SPBDM4\_v1\_40925|ID:27158230|dppF| dipeptide transporter ; ATP-binding component of ABC superfamily  
[Uncultured spirochete bdmA 4]

MQASADRESDILIQAEHLKKLKLFAMKKNLYSRPLYVKA VDDCSFSIRKNTVFGIVGESGS  
GKTTLGRVILRLIEATDGSVVFDDTDLMSLSNKELELFRRRMQIISQDPYNSLHPRKVVK  
KLIGELQIHFQLSSQEVDERVKNILTLVGLREEHMYRYPHEFSGGQRQRIAIARALVLK  
PEFIVLDEPTSALDVSVAAILKMLKELKRDFSLTYMLITHDLAVIDYMADDVAVMYLGQ  
IVELGSKDDIFLRTAHPYASLLIDSVPPPTPSEHWSGKILNGEIPSIHVPSGCRFHPRC  
PQVQEICRTKEPVLSELQPGHFAKCHFPLNS\*

>SPBDM4\_v1\_40926|ID:27158231| putative Beta-lactamase [Uncultured spirochete bdmA 4]  
MRPTEIANAIHFIENYVPAVHETKTPGCSLAVICGENVVYESGFGWRDIGRSLPATPDT  
LYGIGSCTKAFVATAILLSEQGKLSLDDPVDRYIPFKLRSEKGPITIHFLTHSSGLPA  
LSTSEILIQKGLGVDLGFPLASGGDFYRWVNGAQKEMTPGLGEKFFYSNESYRMLGHIVQ  
TLTDMPFHEFVTKNILGPLGMTRSTFVRSRYEDDADRMQPYLTKPDGTVPASFPYDPVT  
SNPEFSFMLAAGGLISSVREMAKFASNLPTSKARLLKPESLELMQEPYIARPSSHYGKN  
GYGYGWTITENFLGIPMAHGGSIDVSTAYTAFLPQKGVGAVMLANTAGLPHAAIVEGIF  
AALLGLDPFKVIPPLGIKKRMNVLADYEAYRGATRARVFSKAGLLYLEQKDDFQDLVVP  
LIPEDDNMARYRFYILTEGARQPVEFRSTPDGLDLYVERNRYHKVR\*

>SPBDM4\_v1\_40927|ID:27158233| protein of unknown function [Uncultured spirochete bdmA 4]  
MMTNERAKKKYEAVQTFRLRSKIESGVIVPGEKLPSESELMAQFGISRNAVVRQAINELIKE  
RLVESRQIGITFCVKRTQGTSMIAMVAFRISYIFPRLVSACNQSIQRDGYTLNLSL  
YNVAKERSVLLDLRKRNVGDIVITPVLEGSKQYNADLLNEFEAEGIPVLLDGEYDPDYAF  
TSIVIDEVAAGRKAAYLWERGHRDIGMIYSSNYRPKVLRDGVLGFLSSVGACIRDEWL  
VGIHQISSLETYQIRALLAQKKQLPSAVICSSDDEALMFMRQAQRHKIRIPEDVSLIA  
FDNSDMARYSSPRLTTLDHPSEYMGELAGKLILDRIYHPDVKSRTTRVIDTNVISRDSVC  
SLNFSVGAHNS\*

>SPBDM4\_v1\_40928|ID:27158232| protein of unknown function [Uncultured spirochete bdmA 4]  
LNALITGGDQTGENIRRDPERYHGDKHGRTLRPLDTKGSNALPALNKPLFDQFIDCLANS  
IAGYTELGHQLR\*

>SPBDM4\_v1\_40929|ID:27158234| Sugar phosphate isomerase/epimerase [Uncultured spirochete bdmA 4]  
MRVGFHTDAFNAAFSFEKCLQWARDNDVHCIECGAIEGVSWIHGLGYFPHISLVEDPVL  
LREKMDRYEVSFSQIDAAYPLSGKDGPIFGVPYVLKTIPWAKLAGCPNIATTDGLYKPEG  
LTDDEAMEAMKRSYGMIVDTAEAYGININIELHGYFTTNPDMIEKMLDFTKSERLGINFD  
TGNSFIAGNDPVAFCRRVLPRIHVHIKDVSKSLADAARGKATGIGISHSAIGDGVNAEN  
IRQILTLLRDYGYSGTSLSECEGQGGPLIERSLGWLRGTLKALNIVEER\*

>SPBDM4\_v1\_40930|ID:27158235| ABC-type sugar transport system, periplasmic component [Uncultured spirochete  
bdmA 4]

MSRKLLIVALAALMVLGGIVPATAQSSGKQYVYGYVTPGPDTWYKKDVDGFVYAAGLAGA  
KVIVLNSNYNPETEIANIDSLINQGVDMCVFTFNQNGANIAAQKCAA AKIPLVVTDNVG  
LVLKSGYDVVA AIDFDWVGMGKDVAEYAAKQFPGQDIAVITGLSEHVPVQMFMSFKPTV  
EKLKGNKIVAIRDGKYDPTVAANAAQDLVQSGTKFSLLFVFNDEMGA AVVRVLKAAGVLN  
NPIKVLTTNGAPY GIDSIKQGGISYSISTSPGWEGMVSFLALHANKTGKIKTLNQQLLP  
NTAITPSNIDDKMQVVPWDIDPVWKNLTAKYFPQFNGMY\*

>SPBDM4\_v1\_40931|ID:27158236| putative ribose/galactose/methyl galactoside import ATP-binding protein 2  
[Uncultured spirochete bdmA 4]

MQRNFVTNNEPILSAKQVSKTYGGHCVLKVSFELHSGEVLCVVGENGAGKSTLIKILSG  
AIRPDSGIIGVHGGTYSALNPRESMQLGIATIQEVELIDSLVSDNIFLGNETLGRFPL  
VIDADSQNKARQILDMLHIDIDEKMLVEDLSAAQKQNLQIVKAHFQDARVLMIDEPTSS  
LGVEETRSLMQLVHDLRGRGLGHIYISHYLEEIFEIGDTILILKDGEQVGLYPRADIDVN  
FVIHNMVGRDASMFVRRERVPIGADQIQVENISWKDAVKDVSFNVRAGEVFGIGGLVGS  
RSELAASIFGMVRKDAGTIRISGQELSINPKDAIKNKICFITEDRKKYALFDSMDVQEN  
IVIIHTEFGKSHLLKQKKENSLAKSMIDKLHIAVDNTEESVISLSGGNQKAVLGRWLLN

DATLFI FDEPTKGVDIGAKEEYKLIHELARKGKSIIMISSDMPELLSMSDRIGIMREGR  
LIKILDNQRITEEDLIHDFIGI\*

>SPBDM4\_v1\_40932|ID:27158237| Permease component of ribose/xylose/arabinose/galactoside ABC-type transporters [Uncultured spirochete bdmA 4]

MERLMKNGKHLKILHTQWFTLLVVIIVISVVTGMVNPFFRLANIINIFEQISTLGVVAS  
GAAIMIISGNFDISVGSIIGLSASVMAMMIKAGVPIWVVVPCGILIAIVCDAFVGFSTIV  
FHAPSFITSLASSSIFKGIALALTSATLQTIFGKFSFLGSARVFGVVPLMFILGIIVYL  
VYFILKLTRFRGRVYAIGSNPQAA YLSGINVKGSKMLFFIINGTLVGIAATMLLSRIGAA  
GASTGAGIEMQAIGAVVIGGTPISGGKGGILGTFLGVLLMGLISNSLNMLQASPYLQELA  
TGALILAVAVSALS NRNGKASM\*

>SPBDM4\_v1\_40933|ID:27158238| Sugar phosphate isomerase/epimerase [Uncultured spirochete bdmA 4]

MTVSNKSASATSKDQNFEEKNAEIRIRYLHAKRTNPAFFSRRIDLSWSIWMFGLPIGAS  
LDRLTRNDIRYVELKGDHWTSDSGIRSHLSAALAAAGVRVSGACGMFSQDNDLSSPSAY  
ARQNAIDYIRRELDLAEVDARYLIVVPTAVGRPVAKDTSEVQRSALRRCGDDFARTK  
IRAAIEPIRASEVSLVHTVSDAIRYLEVVGHPAIAHINGDVYHMSLEERNVGEAILLAGD  
KLANLHLADTNRDALGTANLDDLTVIMAAYLAGMNQEGRFLTPEPLGPFDPYVLSNSPC  
NVSIMDELVRKTVSYFREREIVRSLE\*

>SPBDM4\_v1\_40934|ID:27158239| conserved protein of unknown function [Uncultured spirochete bdmA 4]

MIEKVHQFSRIDSVMMEKIIDEDHVNINHIIVAPGAAVPVHVANSHVHQIVIRGTLSSL  
EDGPEHNYPAIGNIVAPFNTKMAIRNGGIEPLEFFVVKSPNPRSMPTKKI\*

>SPBDM4\_v1\_40935|ID:27158240| conserved protein of unknown function [Uncultured spirochete bdmA 4]

VPPLPFPRIDLTACVIEAMNQHEIISPIELDDRGHIVEEGWARRQLWRYDRSRIRAS  
WYRIKEWDYYCVLSQKREYGI AFTVSDLGYAGLASIVWLDFAKRTFVPFDSLKMFTRGKL  
GFAPTSSRGDLRYKDNKLEISYILRKGERRIVARCP SLGDGRELQCDLVLAQDPEADSMN  
IATSWKENRRAFYYNQKVNCOMPARGEVTIGGEHYLFEPDSSFGVLDWGRGYWLYRNRWYW  
GSASGLYEGIPLGWNIGYGFSDRTPASENMIFYGGRAHKL EIAFHINPNDYMAPWKITS  
SDGRFEMDFEPIVNRHSDMRLVVISSLQNQLFGYYSGQLILDDGRTLKIDKMLGLAEDVQ  
NKW\*

>SPBDM4\_v1\_40936|ID:27158241| putative ABC-3 [Uncultured spirochete bdmA 4]

MRELLQIPAFSRAIVALFACGTAFPLLG IYILSLDLIPVRFVGMHLSLLGATVGLIFGVD  
PVFFAMLFSAAGFAIAGLSSRKSGGTSGGAMALLMTASLG VVFIKFYKTNIHAIEAFNL  
FWGNVLALDRMEVLLVVLVSALILAGTIRFLRPISAVLFDRETAYAFGFPSTVVYTGILV  
MVCAGIGLGIRITGALMVDAVTL LPAALAAQSLKKNFKPTMLLASVFGVCINLGGFALAVV  
FDLPTSPAIIVGTVVVLVCKLAARLQTKKKEKGVSWRASSISAH\*

>SPBDM4\_v1\_40937|ID:27158242| putative Zinc import ATP-binding protein ZnuC [Uncultured spirochete bdmA 4]

MSAGAADKAPCDGQSILSAKMLSIGYRRAQP VVRDVCVDFPAALRKA WTGEKQQRDNVFG  
FVGPNAGAKTTLKTCGLLSPLGGELRLLGVDTRKACFAETRKKL AYIPQNRPEGSSGQ  
LRISVREAVSFGRLGKCGLTGRFN RADREAVEAAILYCGLET LADKAVQDLSGGQFQ RVA  
IARAMAAEPALYLFDEPGSYLDEEGQAAMQNLIRSLAESGIPLIIVSHDRALIALCDTVL  
LFEKGTARLLDAGAFLSKMAERDI\*

>SPBDM4\_v1\_40938|ID:27158243| putative cation ABC transporter, periplasmic binding protein [Uncultured spirochete bdmA 4]

MAIRHSHHGAQVLLALLC LLVLPLAAQE QPVIASTSWVQAYVIAAGAKNVVTIAPFELQH  
PPEYEIKPSDLLAVQHASLVVYSGYEKFAKKLAETAQNKNLRILAVYTDNVPSTIIAESK  
KIAEALGTTEAQAQWAQSFTAFTKNLRSEVASSLPDKRVV VQA YMKTFVDWLGLDVVGT  
GPGEPSPAVVLDIKKKPAMVLDNYHNPGGKALAESLGPYVLLINFP GKDGTRTIEDVF  
LYNEKAILGRGKE\*

>SPBDM4\_v1\_40939|ID:27158244| conserved protein of unknown function [Uncultured spirochete bdmA 4]

MQKKPIIIVVDGLGGGIGAQLCTKVRHIFAQRVEILALGTNSTATEQMLRAGADR GASGE  
NAIQVSIDLQVILGPIGIVLPDSMMGEITPAIAQTIMRANGK KILLPVNQPHFTLVGVP  
PSPLSRNIDEAVGLLASELADMVEREQE\*

>SPBDM4\_v1\_40940|ID:27158245| Ferrous iron transport protein A [Uncultured spirochete bdmA 4]

MNDRLRDYNVGD SVVILGYAGGDHGYRNKLLAMGLTKGSVIKLVKIAPMGDPV GIEVRGY  
ELSLRKA EASVLVGRKE\*

>SPBDM4\_v1\_40941|ID:27158246|feoB| fragment of fused ferrous iron transporter, protein B: GTP-binding protein ; membrane protein (part 1) [Uncultured spirochete bdmA 4]

MNGKGTIAVVGPNPCGKTTLNFALTGSDQRVGNWPGVTVEKKEGLLKFGKEKVTLVLDLPGIYALFASSEDERVARDYILSGEPGLVVDIVDATNLERNLFLTTQLLDLQLPLIVVNMVDLAKARGVSIDYEALSDRLGCPVVGTVASDKHEAAKAVGAIEKAWKAKRKPTTLVEAPYQAERFAKDWRERLSAVAQKLGTVASDKHEAAKAVGAIEKAWKAKRKPTTLVEAPYQKLLKDSADVALAEARYAFIQMVASKSLKHAGHKRTATEVIDKVVLRWLGPVFLVMYLLFWITINVGGAFFDFDGVGATIFVDGFGSLLERLSAPAWLRVILANGIGGGLQTVITFI PQIFVMFFLLSLEDSEGYMARAAFMVDRFMRWVGLPGKSFVPMLVGFG\*

>SPBDM4\_v1\_40942|ID:27158247|feoB| fragment of fused ferrous iron transporter, protein B: GTP-binding protein ; membrane protein (part 2) [Uncultured spirochete bdmA 4]

MATRLENKRDRYLTIEMNPFMSCGARLPVYALFGAAFFGAAAGTMVFSLYLVGILVAIATGLILKRTLKGEASFFVMELPPYHKPMMGNVLRYSGRRLMAFMTRAKYIVPIVTVLAVLNSLGIDGSFGNEDSPKSVLSQAGRAITPVFEPMGVEKENWPASVGILTGVLAKEAVIGTSSLYSQNAAADKEASAAIEETPVADNKGHFHWDGIVAALATIPENLVGIGGSFDDPLGAGVVSQDQEAVAEEVGADTSVYAGLRANFTGGPFQAYAYLLFVLLYLPCVAAFAMTKEMGLKYTLIATAIYAVTSWSAATLFYQITLGHNIFWIIFAVVLAAMIFVLRALGKQVEEESGLSVKEAAA\*

>SPBDM4\_v1\_40943|ID:27158248|aldB| aldehyde dehydrogenase B [Uncultured spirochete bdmA 4]

MRKFIDENYKLFIDGKWDGKGFETHCPANGELLATCAEADKGDVDRAVSAAWRAFETWKDVSPQERQRILLKIADLMEANAELAMVETFDNGKPIRETRAIDVPLSIDHFRYFAGV VRAEEGQATMIDKDTMSLILREPIGVVGGQIIPWNFPLTMAAWKLAPALAAGDCVVIKPSATPLSILELAKLLAEVLPVGGVNVVTGRGSTTGNVILEHPDFRKLAFSTGSTEVGYSIAEAAAKKIIPSTLELGGKSANIFFPDCPWEKAIEGLQIGILFNQGGVCCAGSRVVFHEAIYDKFLKEAIAAFERVKVGMPEESTQMGSQINEAQVEKILSYVEVGKKEGAKVATGGYRLTEHGLDKGCFIAPTIFTVDNKMRIAQEEIFGPVVCFIKFKDEAEVIKMANDSEYGLGGAVWT KDINRAIRVARAVETGRMWVNTYNSLPAHAPFGGYKKSIGRETHKMMLEHYTQKKNIFISLSEGKVGLY\*

>SPBDM4\_v1\_40944|ID:27158249| conserved protein of unknown function [Uncultured spirochete bdmA 4]

MVVTKDTQVEEVVKIKGVISYFIQRGVSPISCSGAFPQSLGNLLSIKKVADPDAFIEGLNEYIASQSQELKDKTDD\*

>SPBDM4\_v1\_40945|ID:27158250| conserved protein of unknown function [Uncultured spirochete bdmA 4]

MADDVSLKDELIQKAIEVFSRKGYEATNLTDITDALGISRGPVYYHFKDKYGLYVAANLWASKFQHDHDLILAQDKHIIKILEDVYCCIDMYKHFRPNFFVGIDTVEELSELKDRYYLLVQHIYNKKVETVKRAIARGEIRRSISPELVVDMIYVLYDGIKDGLERPLVKIKESLKTIVTVQLLGIERFCCD\*

>SPBDM4\_v1\_40946|ID:27158251|folD| Bifunctional protein FolD [Includes: Methylenetetrahydrofolate dehydrogenase ; Methenyltetrahydrofolate cyclohydrolase] [Uncultured spirochete bdmA 4]

MSIIMKGSEVA AIIQQELLKQIERLNQYGITPTLAIVRVGARPDLLVYELGVKKKMRTLGIKCPVFAFPETIDQADFEKNFSSLNDSEIHGILLFRPLPKHLNEKTIIDTINPLKDIDCMSPVNIKVFAGEETGFAPCTAEAVMEVLNHFHGIGLEGKRVTVVGRSMVVGRPLSMLLLKKNATVTICHTKTKDIENTCRNAEILIAAVGKANMITDHFVAPDAVVIDVGINVDSNNKLCGDVDYDDVAPKAGFITPVPGGVGTVTSSVLAVHVVRAAKYLNKIEER\*

>SPBDM4\_v1\_40947|ID:27158252|fchA| Methenyltetrahydrofolate cyclohydrolase [Uncultured spirochete bdmA 4]

MFMEKSGNEFLNLLSSAAPVPGGGGASAFVVGAMGVALASMVANLTSKGKKYADVQADIDRIKKADGLRNELTSLVEKDAEVFEPLSRAYSLPKENEAEKIKDETMEASAKSACEVPLEIMLKVVEAMDLHEELAKKGTRIAVSDVGVGA AFCKSALMGASLNVFINTKLMKNRQYAEENVNQKTEAILSEGIKADNIYRQVEAAVR\*

>SPBDM4\_v1\_40948|ID:27158253|fhs| Formate--tetrahydrofolate ligase 2 [Uncultured spirochete bdmA 4]

MEIKSDIEIAQASDMQPIENIAQTLGIEKKDIELYGAYKAKVNYNIFKELNKKKDGKLLIVTAITPTPAGEGKTTTTIGLGDLSLAKLGNKTMIALREPSLGPVFGVKGGAAGGGYAQVVP MEDINLHFTGDFHAIGAANLLAAMIDNHIIYQGNLSLEIDPRNITWKRCMDMNDRQLRSIVDGLDGKANGIPREDGFDITAASEIMAVLCLSRNIEELKENLGKIIIVGYTRDNKPVTAMQLNAQGAMAALLKEALKPNLVQTLHTPTFVHGGPFANIAHGCNSIMATTMALKLADYVVTE

AGFGADLGAEKFDIKCRLAGITPSAVVIVASARALKMHGGASKAELGKENLVALEAGLP  
NLLKHLENITQKFGPLPAVVAINRFPDTEAELRLIEMKCKEHGANVAVSEVWEKGGAGGI  
ALAEVVRLTQVGNGKFRYL YENELSINEKIEKIVREYVGGDGDYSSAAQKEIHRLKEL  
GFGNLPVCMAKTQYSFSDDATKLRPKNFRVTVKNVKVSAGAGFLVVL TGDIMTMPGLPK  
VPSAEKIDIDSNGKISGLF\*

>SPBDM4\_v1\_40949|ID:27158254|focA| putative formate transporter 1 [Uncultured spirochete bdmA 4]  
VEKAFLSPAETAMSFITGLKKTTLPVFKQFLSAILGGAFIAFAAEGSNVAVHTIASVGL  
SKALAGAIFFSTGLMMVVIGGAELFTGNTLIVACGERKISLGVMLKSWLCVYLGNFVGM  
IIVFLILYSGQLDFSNGLLGGFTIKIAAYKTHLAWGHAFGLILCNWLVCMAIWMASGAK  
DTAGKILAIFFPIWLFVTSGFHESIANMYIYAGILAKANHTWATAALALGATQEIEGL  
TWGSFIVKNLVPVTLGNIVGGGLFVGIYWFIIYHLKAKEN\*

>SPBDM4\_v1\_40950|ID:27158255| conserved protein of unknown function [Uncultured spirochete bdmA 4]  
LKLNLPIIAFKLADRKPNLHLCTNHGNNLLSARLLSPGIVHFDPAVYIGTAEIIRTIDQ  
ASLPSDVIVVGGEEAAQALSETECNWLSEEGDVPEIFNAVQQVDFDFYNQIDSELYDAVMQ  
EQDIQSLLDICSRFFDNPVHLVDSSLRLIAHSSELDDDIHDESWMEMLSTGYASVTVIDA  
LKKANLLDELNRGREAMLVNLGGFILPYMSANIFAHDKRIVSICVREHSHHLEEAQLGLL  
DHVATVLTNVIKQRNLHYLHLYVERIMLDLIKNSVDTGILRFGLSQIGWNVEDSYLL  
LKIIPDFKDVSGGTIEYTGAMIKNLFSGSILLSLSDVLLVIVNLKYCTKALPNIFGTLET  
FLCKRKFVKCGVSLKSHDLSALHGQYMLAAAIAKNGTLIEKDKYLFFYENYVASHILELCA  
KMIDVIRILCHPEALKLYEHDQKNEGTLTYLYVYLMKEKSLVMASQELNIHRNTLVYRLS  
KISEIIDADLNDGNTRLHLIFS YEILRYLDYFK\*

>SPBDM4\_v1\_40951|ID:27158256| conserved protein of unknown function [Uncultured spirochete bdmA 4]  
MNENYESLHKIDMNKVDIKHDPQLRFTPFVYLPAAQPYVGGRLMNSWGIATPVWYSGW  
RDETLSWHQTCSLSAVLNPTSATIIKGPDAKKFLKENFVNNVDNFPIGIHKHGLLCLDNG  
LLATHGVLMTAEDTYEAHWHAPYINYLFSKKNYNAELIDISLKQYIFQLQGPRCLEILE  
KVTGDDLHDIA YRHRMSQIDGHA VRILRFGMAGTLGYEVHGEAEYAREHYKKILETGQS  
YGIRPIAWFSYMNHIEGGFPQLYEHFVSAMSLNEDFVEYLKKTPTGTGGNTYNTSTEGIE  
FLGSVGPDPHNYMYPFELGLGRCINWNHEFPGKAALQKIKDTQDIDTVMLKWNVEDLCK  
IYASQFVPGEDYYKQMDLPADSASVALFGHFLFSTDQVFDENGNKLGSRYSYGRYSHYYRA  
MLSFGALSAKRELKGEVYILWGEPGTKQMKVRATVERFPYNDHLVNDGFDVETIPHPVF  
DR\*

>SPBDM4\_v1\_40952|ID:27158257| Aminomethyltransferase [Uncultured spirochete bdmA 4]  
MKEIPITLNVSELKYVPQYHDVKTYANIFGGIFQWEADDWESTSLSWKKSCYIHAGISG  
VEVTLKGPDAQKLVSMSAINNCYNWVKVGFAXHLVMCDDNGLISSHALVNRTEADAFVMSA  
ANPWPWIKLLNTGKYNAQPFRDIFVFCAGPKSLTCIEDLTQTDLHDMKCLEFRPVKIP  
GLDAKVEVERIGMSGTLYELRGAGEDGPAVYDAFYKLGKEKYDMKRLGWRTYFVNHTEG  
GYPQTSCSFSQACDYDPEFVSSGMNLLPPVYTGSDPANRRLRTPGEVGMWMAKFDH  
EFVGRAAVEAEAKAPKRTIVTLEWNTDDVNNIYDSQFRDGEPIKYMEMPAPQQPAGGHA  
DRVLTVDGKEIGVSSSVVYSKYFHKTISQCTIDVDQADIGNEVIVEWGDFFGGKIKKVRAT  
VARFPYLDLVRNEKYDMNTVPSGVIER\*

>SPBDM4\_v1\_40953|ID:27158258| protein of unknown function [Uncultured spirochete bdmA 4]  
MGIDIKSGIKPPIAMPVINNPIHSSAPCGESHANATPNAEIKPNTNIKGFIFPSFVAIRG  
ANRHPTKNPSVMAVEKAPAATELMPRPPRAVGRNELIVILLARMHIRQSPTIQTGELFAT  
TFNDSEIGREGGTLAPVLTGFFIKAIQRTAAKTLTAAVAYALVIEGNRAVVPVPTVMA  
MVEAAKNIPIMEEIFSGGNQPPKILAAFAFRNAAPKPMII\*

>SPBDM4\_v1\_40954|ID:27158259|folE| GTP cyclohydrolase FolE2 [Uncultured spirochete bdmA 4]  
MPDVQNMKDERLMAIQKVGKGLHYPIVLLDKVNSVQHTTALVNL YADLPYEFKGTHTMS  
RFIEVFDNYRDDLSMPQFLRMLDGI RTALAAETSADIHFYFLEKKAPVSGRSAMMSYE  
CAYRGKVGSGGKEFDVVVSVPVQTVPCSKAISACGAHNQRGIVTLTVALGPPFFWIEDLV  
SLVEDSASCVYTLKREDEKFTERAYNNPRFVEDLVREVYLRVSALGQFPKFSVEAEN  
FESIHNHSA YAYVEYPEG\*

>SPBDM4\_v1\_40955|ID:27158260| conserved protein of unknown function [Uncultured spirochete bdmA 4]  
MISNRFITVIGSDRVGIVARTTTVMANFNVNIVDISQTIMQGIFTMIMLAEAPQEGFDL  
AAFQEGMAAEGKSLGVEVKVQHEDAFRYMHRI\*



>SPBDM4\_v1\_40956|ID:27158261| conserved protein of unknown function [Uncultured spirochete bdmA 4]  
MLMLINPNEILETIRMVRMEHLDIRVTMGISLRDCAHPDIRIFNENIYKKITSRAKDLV  
RTTNEIQNLYGIPIINKRISVTPIAIVAESCAGPDFVSVAKTLDEAAKKVGVDFIGGFS  
LVHKGTTTPGDLKLINSIPEALAEOTEKVCASVNVATTKAGINMDAVGLMGEVIRKTAELTA  
ERDGIGCAKLVVFANAPEDNPFMAGAFHGIGEPECAINVGVSGPGAUNAALRELERPNLT  
EISEVIKKTAFKITRMGEMIGRVVSRERLGVVEFGILDLSLAPTPEIGDSVAAILEAMGLER  
CGAHGTTAALALLNDAVKKGGAMASSRVGGLSGAFIPVSEDAGMIDSVEVGALTLEKLEA  
MTSVCSVGLDMVVVPGDTPASTLSAIIADEMAIGVINKKTTAVRIIPAPGKRVGELVEFG  
GLLGRAPVMPVSGFSSEIFVKRGGFRPAPIQSLTN\*

>SPBDM4\_v1\_40957|ID:27158262|trpB] Tryptophan synthase beta chain 2 [Uncultured spirochete bdmA 4]  
MMTKAILTEDEMPRQWYNLAADLPGPLQPPRGPDKPVTPEQLAAVFPMLNIEQEMSSER  
WIDIPEEVLAILFKWRPSPLQRAYGLEKALKTPARIYFKNESLSPAGSHKPNTAVAQAYY  
NKAAGIKRLTETGAGQWGSALAFACAQFGLECKVYMKSSYEQKPYRKYMMQWGGTCV  
PSPSDTTEAGRAVLRDDPKSPGSLGIAISEAVEEAUSDSTGQTRYALGSVLNHVMLHQTI  
IGLEAQKQLAKFGEKKVDTIVACVGGGSNFAGLAFPFIEKIEGADIEIIPVEPASCPSL  
TKGKFIYDLGDVAGMTPYLAMYTLGHTFMPHPMHAGGLRYHGMSPLVSQAAAEGLLSPSA  
VPQLECFEAAVTFARSEGIIVAPETSHALAQVIREARKAAEEGKEKVFGLSGHGLLDM  
QGYADYFAGKLSNLELSEAEIEKALARLPKLETVG\*

>SPBDM4\_v1\_40958|ID:27158263| ABC-type transporter, integral membrane subunit [Uncultured spirochete bdmA 4]  
MNQQQGVQMRGKRGKKPIRPGTILGKAVAYLVMGIFAFMTIYPLVWLVFFSSFKTTTEFRT  
NMMGLPIDWTLNYSRASKIGEFDKLIGNSVLYTLGSTVGITFLLTGFATAKIKSKAT  
GPIYGSFIIGILLTIQSLMVPLFLEVTSIDRGIGDFLRSLGLVGSGEFRLFHNTRFGVLI  
IYIGSALPVGIYMCTEYIRGIPSAIIEAAQIDGAGYFRIFRSIIVGMSKPIAMTSLILNI  
PSLWNEFALINILVSETNLKSLPLGIYKFSGGLSSDYGKQFAALVIGMLPMLLFYIAFRK  
QITAGVSMGALKE\*

>SPBDM4\_v1\_40959|ID:27158264| ABC-type transporter, integral membrane subunit [Uncultured spirochete bdmA 4]  
VNGTATKAAKDRRAYWAMVLPFLIYLFVFGFPIVLAIVLSLSNYGGGKMFGGTSWGITG  
FRQYQRLFADPYFWNALKNNIYIVLVSVLGQLPLGFIFAYLIYRKTVKFEFEWQGVLYVP  
AMISTIVVILWSIIFSPYGPADTANHYYASAYSAKISGIFQTTGGLSDPDELTDQIHK  
ASPSTINTVFSDPSVDLKDFLLSYEPGDTATLQKDLVNLAPRWADFLSKNNVAMIPIC  
FVTLWMWVGTYLLIFLANMQKIDRGIIIEAAQIDGASEMQIMGRVVLPSLSKVIANSAILC  
ISGSLSGFALILAMTGGGPARVTQVLSIYMYDKAFMGAPDYPLANAIAMIVLFLSLALVG  
IMFALERRFGGKE\*

>SPBDM4\_v1\_40960|ID:27158265| Extracellular solute-binding protein family 1 [Uncultured spirochete bdmA 4]  
VKKKICSALMFLVILSMGAYAQKTTLTVFDYIDATAPGYAENEAIWQRFIDENPDITIVK  
EELSNEPFHQKLAAYVAAGTLPDVMYMYPSGRSTMLHEQKLVKDLAPLLGKDYLANFIPS  
VTDPSGQKGYLAELPQISISYTTVMFTNTKLLSDLGLRVPSTYAEKAMLPKPKAKGIRP  
VLMANKDDWVMQSCFLSTIVGRMLGDEWIDNALAGKVKFTDKEFIKALDFVETMYKDGVI  
GRDTIQISYGEAPALFAEGKAAFFIDGDWRQNAFLTDPSSGKALIDPKRQQTDFEYFNFP  
AIPGEKNPGVASAVLGCYGISASIPAGSDKEKAAVRLLKYLYSADVQRQYLELGRYITS  
RKDVKSDKLEPFTVKMAAYHDAVKKTCYVLDGALDTSIYTPLNLGLQQIGLGTKTPTQVA  
QSVQAAVDAWRASH\*

>SPBDM4\_v1\_40961|ID:27158266| ROK family protein [Uncultured spirochete bdmA 4]  
MPKTKNSSRILRTIWQYPESSRAEVASHLGLDKSTVTLEVANLIEQQGATELPOGSPGKN  
GGRKPIPLIINKDYGIIIGIAIQSGHYSAAVNLAGIIEVKEEDESITKENLAPSIQAI  
YWELKSRLGKYPGAILGVGVGGGLINPNDGTVEFSVPLKISEPVNVVETLSKKNLNPFF  
IENNANCCAWSELAFHKNTELKNILFALIEFRQALVPHAEGGVGVGFGIVLNGKVHYGS  
NYFAGEFRSVLCTENNGIQVSCSKEELSQLNDFSVLEKVFSELARNIAMLVNTLDCDSV  
FIGGDIEDSDLDFCRILEKAIHDNWMYPVKRHRVRIQYSSMGAEAVAFGAAGMLLNRLFAT  
NKFPVGPREQTELSQ\*

>SPBDM4\_v1\_40962|ID:27158267| conserved protein of unknown function [Uncultured spirochete bdmA 4]  
MTYYRKGSDMAQCMIIPTYWSTPDIPSWKIFDHPPIGETGLGRTLNDNIESTGYDPDVI  
IFPAPTDSHIEAKVKEISRNALDIHVFSDDLISIRQLRAVGFPAPLLGDISMDSYGG  
VRNMGLLYAALHGFDTVIMIDDDECIDPHYRDSALKFIGDSWEGKTVLGMTGCVVDSKGN

KFYDQGKSDALRGWPKDELNFNKEVVEALDKKDQLSESKIAFGGNMVLNSGLFLRVPFDPY  
GTRGEDDDYILNARYCGLPVFFDQELLLLHLPPERICNYWTRQRQDILHFRYMREKVRIF  
GFEPESLGGFLGYFTQDDLEYKAISSSIQAAALHFIDTRNEFTEFLNNAIAAETPPVVQL  
RSRVNAFLRFMDAWQSVLPKIAD\*

>SPBDM4\_v1\_40963|ID:27158268| DNA and RNA helicase [Uncultured spirochete bdmA 4]  
MRIIADLHIHSRYSRATSPKLTLSHLDRWARIKIDLVGTGDCTHPTWLAELMEQLEPAE  
GGFFQLKSTLRREFDSGEALAEGLPAPSGENPVRVLTGEISTIYSRDGRTRKVVHVVIL  
PDFAAAAAFQARLERMGNISSDGRPILGVDSRDLFAALLDADERSILVPAHIWTPWFSAL  
GARSGFDSIEECYGD LAPRIGAIETGLSSNPPMNWAVSALDRFAIISNSDAHSPEKLGRE  
ATVIDMENSFVGLAGALTGGGPAGRIAGTVEFFPQEGKYHYDGHACGCVLSPAESAAYG  
GLCPVCGKPLTPGVMRRVAELADRPVDETASCPDYAGTNRPPYKSLIPLPELLGELLGV  
GSGSKKVAAYGALVERAGSEFALLDQSEAEIETLGTAGVPGELLAMA VGRMRSGQVSI  
KPGYDGEYGVIAFAPGERIGVKAGAGLFDDEVGTGEEETPPPDKAKAGTPAASEPAGGK  
KRATPPAASDKAPKAVPESGTA AFGLDPAQEAAVNHPGGPALIVAGPGTGKTTVLALRIA  
RLVEGGLDPSSILAITFTNKA AEELRGRIEGTIGGERAARLTTATFHSFCLSVLREHTAD  
ASLLSFGVLDEEEKTAFLKLA VGPSEGRAGAGDAQMDSTHAVPMQARPQKIRRLASYIE  
ERKRFLLLPGDRVPRLGPGAPGGLAELAEELGVPLDVLVDVAYARYRDELKRAHALDFD  
DLVAGAARLLAARPEILSAYRARFRAIFVDEYQDVNFAQYALLRLLAPGTPAAPGTLGPR  
GSISTELCVIGDPNQAIYGFRGSDRRFIERFLADYPGTAIYRLVRSFRCAPGIIGAAGRL  
VGAELGGSGTVVALSRCEPPTDASEAEGIAREIDRLIGGTRFFAIDSGVVGSV GAGSGAG  
LAEAHTASREGPVLSSLGECAILVRAAALAPPIEKALRDHGIPYRFIGEKPWWEIEPARS  
ILSLVRAAARTDVRVDVSSAGNLKEAAGATVDIVAGPHCGSPNTPQGQAPVGEALRALLL  
GLSPA EVAVSAAIELLDVEADAGASKAVAAGVPREAFGTRPGKSLERLVSQASLYPDLASF  
LDDLALGSPQDGYEAHRENVSLMTMHA AKGLEFDYV FVAGLEEGILPFTLFEGRGAGAGD  
RKGETSEEGDRSGRATGQDNALLRERIEEERLLYVAMTRARVGLYLSWARSRHFFGRK  
LTLAPSRFLAQIEDLVPMVERAAPKKPKDSQLTLF\*

>SPBDM4\_v1\_40964|ID:27158269| protein of unknown function [Uncultured spirochete bdmA 4]  
VKKNKESVDPSEACADATELAGKTSTQLAPSVSEVADILVRRYRPWPDESAGPVIDQLVW  
FLLSTRTTVENCNAAYAALRGCFSGWDEVAEAGEEALDAHIWRVTRRLGWHNFPGETPSR  
RGADHLNALMPAGLDVLSLHVNLIRLGRFCPAGKPRCGECPLGAICATAATKRPGTSAR  
HALDQVHGFKKSRPEL\*

>SPBDM4\_v1\_40965|ID:27158270| Toxin HipA [Uncultured spirochete bdmA 4]  
MSSLAEVRLWDTRIGAVSLRDGEEVAEFQYSDEFKSGIQLSPLVMPLSSRVYRFPTLPR  
GTFHGLPGLLSDSLDRFGNALIDVWLARQGRRPESFNAVERLCYTGKRMGALEFVPST  
GPEAKQAQRIDVENL VRLASQVLQEKEGLRVALSGDKQGGVGRTEGARTFSAAGAGNDDK  
ALLQILRVGTSAGGARAKAVIAWNPRTNEVRAGQLDAPPGFEHWLIKFDGVKSNRDKELD  
DPKGFCTVEYAYHLMARAAGIVMTECRLPEHGRRHFMTRRFDRTVDGQKIHMQSLGALA  
HFDYNRAGAYGYEQAFATIRALGTAMDDVEQQYRRMVFNIMARNQDDHVKNISFLMDRGG  
RWTLAPAYDLTFSYHPSGEWTGTHQMTVNGRRDGFIVGDLKAVAGVAGLKRGRPEDIARE  
VHDTV ARWPEFADMVGVAPAQRDAIFANLRLSGELLP\*

>SPBDM4\_v1\_40966|ID:27158271| Helix-turn-helix domain protein [Uncultured spirochete bdmA 4]  
MKLNNALTDVTVLEELGRRLARARIAASLTQADLADRASVGKRTVERIEAGGSVQLVSLI  
RVLRALDLETLDMTPDEGPGMEMLERQGKVRRRVSSSRKAGVPGPTATPWVWGDER\*

>SPBDM4\_v1\_40967|ID:27158272| putative ABC-type transport system, periplasmic component/surface lipoprotein  
[Uncultured spirochete bdmA 4]  
MKRLVLMMLALCVAFGSVYAVPKNKIKIAMIVESTVDDKGWCQSMHDAIMAVQKKYGSSL  
VEYSYSEKMKPVDAGSARQYVAKGYDIIIGHGAQYKNLMLEMAEEFPKTTFAFGTSGEI  
GPKNVFTYMPSEETGYINGVIAGLVTKTNIIGLVGPVDGGDAARYNRGFVLGVRVSNPK  
AQVQVAYTGSFGDYVKAELAHTQIKAGADVLTGSAQQALGALRAVAEYKDKAIWWVGQD  
TAQLGIPEGYKVIAAASYAYEA VVENLIDKRQAGVLGGECIPLNFANGGFVYQFNDKVGP  
VLTADIRKSAEKAKADISSGKLSIDWQSVK\*

>SPBDM4\_v1\_40968|ID:27158273| [tsgD] Glucose import ATP-binding protein TsgD13 [Uncultured spirochete bdmA  
4]  
MGAMNEKIRELVEGITKRFPGIVACDSVDLAVGENEILALVGENGAGKTTLMNLMGLY

QPDEGRIFINGRPVQFKAPADFAAAGIGMVHQHFMLVPNMTVAENVALGLKESHKYLRLD  
LSGVKKRIA EVSERYNLPVQPDAYVWQLSVGEQQRVELIKTLCFGARFLILDEPTSALTP  
QETDELIVLLRRMASDMSIIFISHKLA EVTALSDRVAILRRGRVVFKGTTAGQTAAGLAA  
LMTGHEVVLPRNKCIDGCGEERLVVRDLKVKSDRGFLALDGLGFSIRS GEILGLAGVSGN  
GQKELADALAGLRKVEAGGISLMGMDLVNRS PREIIDAGLGYIPEDRNNEGIVSSFSVKE  
NLILKDFASSGFSR GVFIKSREEEQNAVLLQERFDIRCSSLNNATGSLSGGNIQKVILAR  
ELAREPKALIAVYPTRGLDMGAEFFIHRLELRARGAAIFLISEELDELMNLC DRIAVI  
FKGKILDTLSSRDATRPKLGLLMAGIKPEAEEATAEAGTEAVTKQGF GARA\*

>SPBDM4\_v1\_40969|ID:27158274| ABC-type uncharacterized transport system, permease component [Uncultured spirochete bdmA 4]

MKTPLRVAYVVLVSLVAALAAVGIGAI VLTILGADV FQTYKVILTEPLKDLFGITEVLVR  
AVPLILVALGIAISFRAGILNIGAEGQIQMGVISATAVALVWPDL PKGILVPLVLLGGAA  
GGALWASIAGYLRAKLG VNEILSTVMLNYIAAQLYGFLLRGP MIDPAELQTGSGTPQSMR  
LPKSAWIDRIIPGTRLHWGIVLAVVLA ILVYILMWHTTWGFKMRAAGASPKATRYGGIN V  
ESCLFSAMVLAGAFAGLAGAVEVTAVHRR AIEGISSGYGFSGIVVALFGGLHPGGIIPAA  
LFFGVLLVGTDMTQRIMSIPANMVS VLQGA VILSIISAKMVINDPYAREKFARRFLH SKD  
KERGPGGEGIPEEHGAQNEETV NIEAKQ\*

>SPBDM4\_v1\_40970|ID:27158275| ABC-type transporter, integral membrane subunit [Uncultured spirochete bdmA 4]

MTILNIVLNILSIGIPFSVSLLLASLGEMFNQRAGIFNLGCEGIMSMGAFLGFMSAYYLQ  
NTAMVPYANLIGIAAAGIAGALLGLLFALVTVTFHAPQGIAGIGLQMLGTGTAGTLFRHF  
VGGVTGVPGLPSYPIPLLSKIPFIGPVFFNMNILAYAAFLFVPVSHYILFKTPWGLK VRA  
VGTSPRSADTMAINVNRTRYQALAA GLLAGIAGAYLSLGQA KMFADDIVAGRGFIAVAL  
VYFGRWDPYWILGGSLLFSIAQSLQLSIQVLGKIFPYEFV MFPYVLVIVVLA FTRNSAI  
KGPSELGV PYPDREKRI\*

>SPBDM4\_v1\_40971|ID:27158276| protein of unknown function [Uncultured spirochete bdmA 4]  
LDRETGKALVFANRPGDFEKMMRIVGKHFEPEERVPLNASMMVLTIA YDILGA ADEIDVW  
EKPFGHSDEASRS\*

>SPBDM4\_v1\_40972|ID:27158277| protein of unknown function [Uncultured spirochete bdmA 4]  
MPPKNDIESGKLKIGDNWNAISIALSQNNPLKAIAEFVENSIDAGAKNVTIVRGKQKND  
HYIKVIDDGC GIKDFRYVATHIGDSIKRELKRKGGT DIQGEFGIGLLSFWTVGETCTITS  
MGEDGVVRSMLVKGNPSYAIRETGTLFGRQGT ELIISPVLAGVRSLSGDKIQNFLASEL  
RDRITKSGVRILILDHASRREL VVEPRKFKGRLIHLQ LPEIRCPFGELYLELYFAESPQDA  
VVGLQKRGTRVLSDISRLDYFARPPWDSRQIEGLIDAPFFQLTPGTRDGVVLDEAYDSFC  
VAIAPVEAALNGLLDEQRRADEEEASRQVLNRVTRAFREAFHLPTEDYSWLAARTSDAR  
RGARAGAGGEGGAGADATGN GEGQTPAISGGPAENSGTEASFGEYIPNPLEQKEVQRDF  
FEYAGPLYKLMIFPASSVIGVGERKKLKAVARDRAGRMVEGDIAFEWHIADGGGALEGTD  
SVYAEYVAPEEPCVA AIELKAVQGETVLTASALVTVTADLVKRSAGAGAGIGGAI RRGLP  
GYTYQKAPGQLWRSRYDMEQSVIVINNAHADFIYASRQPMTKLRYITRLFAKELVLANFP  
EATKEEILERMVELTLYTEENLK\*

>SPBDM4\_v1\_40973|ID:27158278| protein of unknown function [Uncultured spirochete bdmA 4]  
MRKRYDKEFKAKVAVEAVRREKTAQELATICRVHPNMIAFGPVTSNIFQ\*

>SPBDM4\_v1\_40974|ID:27158279| conserved exported protein of unknown function [Uncultured spirochete bdmA 4]  
MKKIVSLLLALTLTAGSVFAQASGAMITFGLISDTHVCDKPDQSTTIALNASPRYFTGGL  
AKIEAFATAMNAADA E FVAELGDFTDNPATPGLTPARRREVAMGFMRAAEAKFALFDGPR  
YHVFGNHDTDQVSKADFMSVVRNTGISPATTYYSFDKSGVHFIVLDASFRGNGASYS GIP  
GEPGAGYTWDDANIPAEELKWLAA DIATAKSPVIVLTHQPLNNQELIDPAYDPSHTVRNA  
SVVRGILEASGKVLAVFSGHYHDGGYQEINGIKYIVVQANAA YGNDVSYHNQYSTVKIFA  
EGNKYTLALSGNGLQKSYAFSKVLY\*

>SPBDM4\_v1\_40975|ID:27158280| protein of unknown function [Uncultured spirochete bdmA 4]  
VEFEENYMGTTTRYSEAQKEKILKTASKLFIDKGYKGT TTTREIADVARINKGLLHYYYNRK  
EDIVSDIYKAFVEGLIGFVENRYGH ELKGLDFFALLNMLFFKVATSERQYIEILLDVLSN  
TKLTKYKIDRSMECCLDVLL ENGEQEKRSQLLIAITISVGAESQLMLAIEDGSDMTYRE  
LAITVLHVCLVMMEIDEAE TEAII GRALQKADTIDARAILDYIGQRCAWAGLPQAM\*

>SPBDM4\_v1\_40976|ID:27158281|fldZ| 2-enoate reductase FldZ [Uncultured spirochete bdmA 4]

MKYQILFTPFKVGQVTVKNRFCMAPMGNSIGFGAKGEFSQNGVDYYVERAKGGVGLIFTG  
ALITDMQVDPFSPVEGLSPLYSPMNFRRRTAIALNERVHSYGTKIFPQITMGLGRNYPGLY  
APSELPVFFDPNQKSPALTKDEIKKKIDAMVQAAALMKASDFDGVVHAMHWGYLLDQFA  
LAITNHRRTDEYGGSLNRLRAAREIVEGIKQVCGSSFPVTMRLGLKSYIKGLFHASLTGE  
DEAGRTLEEGVEICKLLESYGYDALNVDAGMYDSFYAAAPPMYQPKGFTLELAKAAKKAV  
HIPVLAGGSRIDDPALCAKAIIEGEADAIVIGRALLADSQLPKKVESGQIEDIRPCIGCN  
ACMNRAFTTGDALCAVNPTVLRGVYGLNKTVESKKIVVVGGLAGMEAAARVAKMRGHDV  
SLYEKSDKLGGLVPGAKHSFKADMQRLEWYQHELKKLQVPVHLNTGLDADAIKKMNDP  
VVFLAVGSTPVMGLGFKGNDPRVISCIDALLGKKKVGQRVVIVGGGQVGCEMAYEYAKEG  
KTVTLVEALDAVLSTGPAVPIMNKMMLNDLLDFHKVKVYTYGTYLSSVDKNGVVIKSTKDT  
PESIEIAADSVIISVGFKPVPTMAKDLYGSGFEVYEMGDGSKVGNVMSAVGDAYEIARSV  
\*

>SPBDM4\_v1\_40977|ID:27158282| conserved membrane protein of unknown function [Uncultured spirochete bdmA 4]

MKKLFAVIALLCMATVFATAEAPVGNSTRPHADVGDLMVNVGANMGWGSFGLGGGVEYIF  
AKWDIPNFAPLTFGTAAKAGLFFGNSLHTDIAALGTMHFGLKTFSSLP AFLRNFDWYYGL  
GVGFGIGDTGGFGLSTGTGISYYLNPKLALNADYFYTNFYGAGAGSSGTLGIKMEI\*

>SPBDM4\_v1\_40978|ID:27158283| conserved protein of unknown function [Uncultured spirochete bdmA 4]

MELKEAFKTAIKGEIEGRELYRTAAEKTDDKKAKKNFALLADEEQKHL DALLKLAQEYNE  
GKELTIPSLPAPTSFQDAESPIFTKEFKETIANKDFEMSTLSIGIKLEIESEK FYREMAK  
MATGPD LKKFFEYLADWEKGHYEYLSKQISFFENYR TKYSMARF\*

>SPBDM4\_v1\_40979|ID:27158284| Alkaline phosphatase [Uncultured spirochete bdmA 4]

MRKDSKKGII LAVLILLAGMQDFAQSVIMLIPDGMSVAGTTLARFYKGAPLALDPIACGL  
VSTWSSDGTIADSAPAGSSYATGWASQTGNIA TIGKSYVLP GVEIPDYEAQRPVATILEA  
ARLSGRSTGIISTSEFMHATPADFSAHDP SRSNYDNLAEQIAYNGIDVVLGGGTPYLNAD  
KRKDKEDLKAIDANGYTFVDNTAALKSAPDGK LFGVFGKDKSATAMSYDIDRDPAVEPS  
LAEMTAKAIEILSANKKGFFLMVEGSKVDWAAHANDPVA FVTDILAFDDAVKVALDFAKQ  
DGNTVAVIAVTDHGNSGISIGDRSISG YDKTPWTT FIDPLKKAKVTGEGLEAKLASLIKV  
DGTYEPSEAPVIRQTVARYL GITDLTDAEVEAIGKTKAGSMNYTVGPMVAGRAKIGYTTN  
GHTGEDVVL YCYDPFDKRITGLVRNTDVALYMASTLNVDL GQATSRLFQDAASMF AKKGA  
TVSMDTTDPENPVLVVT KADQTLRVPRNKSYAYLNGKAIASDGVAVYNGTKWYVAKNLID  
LID\*

>SPBDM4\_v1\_40980|ID:27158285| Anti-sigma factor antagonist [Uncultured spirochete bdmA 4]

MDFVIEEKDTTATYSVVV VSGRLNGASAPEFKHRIKQIVEAGK SRLILEMGGIVFIDSSG  
LSALISGLKCAREAGGFFRLADLRDQPASVIKLMMLDRVFDIYADVNAAKP\*

>SPBDM4\_v1\_40981|ID:27158286| putative glycosyltransferase [Uncultured spirochete bdmA 4]

MKSAHHHDTRLLLSRAIGLAACALGLNYI IWRYTSSLNMQALWFAIPM VIAETYGIVDML  
LFVFM SWRKPKRDTLPSPEKADVDIFITTYNEPEELVATTAKAALRIDWPDKKVYILDDG  
ARESMKKTAE EIGCGYISRGEWTEKPRHAKAGNVN NALLETSGEFILILDADQIPAPAI  
LRKTLGFFADPALAFVQTPQYFYNLPPGDPFGNEASLFYGP IQQGKDGWNAAFFCGSNAV  
LRREALMQLGIREYVETVEKREREMVDKLT KRVKKTS CDDEETCAAVKRLTEGLKAAREA  
LDDQAPLEHVSDLVIEAVRDAEFLVSKKEVGEIAGAMNELAESGDAEAAAVYRHIIGNLD  
SIARKTPPSFEALRDSEEYVEALNLARSDEAVPVQALATISITEDMATAMRLHSLGWKSV  
FYPEVLAYGLAPEDLGTSLKQRLRWAQGT VQVFVRENPLFKKGLSLPQKMMYFATMYSYF  
SGFFNLVLLAPIIYFFTGIAPVNSWSTDF FVRFIPFFVMNKIMFRFVASGIPVWRGEQY  
NLAMFPLNIRAVLSVLSGKKLGFVVTPKQKEGGHDFRLIWPQTTVIVLTIAAATYGIIEF  
FLGRGIPPVGLAVNLTWSIYNIISLAVVVKALY YQPPDGWSAQLPEFARGDARS GHAPSS  
DMPALDDAGKPDSAGDPGAEKKS\*

>SPBDM4\_v1\_40982|ID:27158287| putative Phosphoserine phosphatase [Uncultured spirochete bdmA 4]

VPAKNANGTESLIDRWNEENYRLLAENSTD LIARISIEGLCLYVSPACTELLGYTPEELR  
GRRVFD FHFPLDRRTVADSLESEV LFRFHKKIVCRLRRKNGY YGW FESKFQFFSDVGT KD  
LQVVAIARDIGDRIRAERFSTVRHTIAAL KPSEADLEKDFASLLGTICTTLTWDLGEIWL  
VEDATSRLKLC SHWCGPSRLKRFSETSSRMAFAPGVGLPGSLWSRGGVT LIDNLPAMYS  
AVRRKEYEEAGLKAAIGTVLADESRTYGVIVFISRSIQRNQELLD MIEETGLELGT FIA

KFRARESLRAESEKLGTLVEESTARIRELQSEINRQQRIEQDILMAAEVQRNLLPVGTPV  
LPGFDFSFAPARYISGDFYDFSKPSPSLCDIIIADVSGKGISAAMMTMAARAFFRHDD  
TVGISPAALLGAMNGALFTDLDHTEMFLTAQLIRIDSGRGIITYASAGHTEAVRFNPSSG  
ECVCFPSTAPPIGILRDIEIGEMEIRTRPGDFFVIYSDGVTEASDESGLFGMERFVRIL  
RSREFVSSADIVQTVLAEVRSFSGDQPLADDLTLIAIGASQRESRLQIAATMENLDPAVA  
FVRDAALPYGSKIADDMELVASELVTNVIKHANPESAVAGNHANAAARDTMSMDISLRLE  
SGRIIFDLVYPGPPFSPDTRARTLPDPFQEGGRGIHIVRALVDELEYSSTPMNHWHVVKR  
VSAEGSI\*

>SPBDM4\_v1\_40983|ID:27158288| Peptidase S9 prolyl oligopeptidase active site domain protein [Uncultured spirochete bdmA 4]

MKPIAIDHFCNYLFPSSLKSNENGRIAFIKGKASLEDNKYLSLDLYLLENGKPVKLTASGG  
IQAFYWLGDSDLVFPDIRKEKDKAYTEKKLPLSVLQRLSPGPGEAQEFVRFAMTLTDMAFV  
SENEFFTA VYDPRIERLPADDEEKATKTLKEENEYIVFDEIPFWRNGEGVTNKKRNRLY  
HYSGGTTEAVTDPFTDVLKFSLPDSGRVIFISTRFTDKMDTSNELFLHEKDGSLKNISF  
EPSGFDHQNFISAGADTIVLQGTDRKEYGLNQNGDFFLYNYVTGEKTVIDDSHNHNGYNS  
VGSVDKMGGGQGPWEQIDKTGIVYFTETIDSSHIMSIDPGTRKLSRITAENGLVQEFIL  
SGGPDNEGSGDSFIAIAMRGNDGPELYRIEKNGRETRLTTMNAGAIEGYAVSTPESFTF  
RNEAGDEIRGWIIKPSGFDPAQYPVILDIHGGPKTVYGSVFFHEMQYWASCGYAVIFCN  
PTGSDGKGAKFADIRGKYGTVDYNDIMTFVDKCLERNPWMDADRLGVTGGSYGGFMTNWW  
IGHTQRFKAAAQRSISNWL SLSNTTDIGYYFSQDQIGEDLWSGTDKLWWHSPLKYADR  
RTPTLFIHSDYRCWMAEGLQMY SALKYHGVDARMCLFRGENHELRSGLPKHRIRRLD  
EIMKWFDKYLKCT\*

>SPBDM4\_v1\_40984|ID:27158289| Formate C-acetyltransferase [Uncultured spirochete bdmA 4]

MNERIKRLREESFNAKPSFAERALLTTVFYKEWLGRVSTPVL RAMNFYSLCEKKTIIYIG  
HDELIVGERGPKPKAVSSFPELTCHSEEDLRILNSRPMTRYSVSAEDIEMYQKTVIPYWR  
GRSMRDRAFAEMPQAWKDLYEAGLTFEFMEQRAPGHTALDGSYRKGLNARRAEIAAARA  
ALDWGKDPEVLAKDEELKAMDIACKGAILFAERHAELAATMAASEPDPKRAAELRQIADV  
CRRVPAEAPRNFWALQMYWVHLGTITELNGWDAMSPGHLDQHLGPFYERDIAEGRLDR  
DKAKELLSCFWIKVNNT PAPPKVGVTAAESGTYNDFTNINLGGIKPDGSDGSNEVSYLAL  
EVLDELQLLQPQANLQVSAKTPERLVKAACRVARRGSGYPSFFNADEVVMAQVGMGKRIE  
DAREGGTSGCIETGCFGKEAYLLHGYLNSPKILELVLNDGVDPLTGKVI GLRTGDPATFQ  
KFEELYAAFERQLAYVVDTKMRASNYLDRMFAEYAPAPFLSAVVADCIASGKDY YNGGAR  
YNTDYIQCCGLGTTTDSLSAIKTHVYEKRDVAWDELLRALSSDWEGREALRLLLSNKTPR  
FGNDDAAADSIAQRIFGSWYQ AIDGRPSRGGTYHIDLLSTTCHVYFGLKTGATPDGRHA  
LAPESDGASPAQGADRKGPTAVATSLAKIDVAKTGGSLNQRFLPQTLEGEKGIDSLANL  
IKTYFRMGGHHIQFNVDATLREAQKKPEDYRSLVVRVAGYSDFVDLDRNHQEEIISR  
TAQEA\*

>SPBDM4\_v1\_40985|ID:27158290| Glycyl-radical enzyme activating protein family [Uncultured spirochete bdmA 4]

MVSGIVDIRKYSVHDGPGIRTA VFLKGCPLHCLWCHNPEGLSFSPEILRRPERCLACGA  
CALACPLKLEPRAEAGGQKCAACPAFGACV GACPAEALQLVGKRMSVGEVLD AIREDLPF  
YEESGGGVTF TGGEPLAQPEFILELLQACRAEGIHGALDTSGFAGRDLVVKAGTLADIVL  
FDLKLEDDGRHKTVTGVSNAPILANLAALYEAGANVILRLPLIPGINDASVDLENMAHYI  
ASLAAEAGPQKAHILPYHSAAKGKYS LRGENYAMGDTPVPSAEAVNKAAAI FEAAGISVT  
IGG\*

>SPBDM4\_v1\_40986|ID:27158291| Transcriptional regulator [Uncultured spirochete bdmA 4]

MNRERDATSEVASLSSAVYEELKRRLNAGTLRPGQFIDLTALGRELGMSRTPLRDALIRL  
EIEGFIVVYPRRGVMVRPLQPSDIRDMYQIIGALEASVIEEIPRRFRSSDADRMDSFRTD  
MTNALAADD FDDYYSANLAFHDVYLELSDNRKLIDTVHTLKERLYDFPRRSTYVKEWERD  
SMAEHTEIC SRLREGDFKGAAYIRDVHWSFEVQERYIRAYYA\*

>SPBDM4\_v1\_40987|ID:27158292| appF| Oligopeptide transport ATP-binding protein AppF [Uncultured spirochete bdmA 4]

VNELNQQT TVDSKILSVKNLKVYFPVEGSKKSAHKYVKA VDGVDFFINEGEILGLV GESG  
SGKSTIAYTIMGMNKPKEGSILFKGEDILKNNNKRSISFKKDVQIVFQDPGSSLNPFQDI  
RQILKLPLKVHKIVPKDQLDEAVAKALDRVELPRNFSYKTSTSIGGGEKQLVSIARALCS

EPKFIILDEPTSSLDVSIQAKIINMLLKLHDEQKLYLFITHDLSLMRNISTRVAIMYLG  
KICEVAPTIFKIFYSMPHYPYQMLSSIPVISKEEEEELKPKKVVSVGEIPSPVDIPTGCSF  
HTRCNRKIDICSQKDPFMREIEPGHFVRCHLA\*

>SPBDM4\_v1\_40988|ID:27158293|oppD| oligopeptide transporter subunit ; ATP-binding component of ABC superfamily [Uncultured spirochete bdmA 4]

MNEHLLDIRNLKTWYRQYQGYAQVVDGVNLTIDAGKKIGIVGESGCGKTTTMMKSVLRVLD  
ERKAYLPEGEILFKNQNILKMRETELQQIRRNISMISQEPSAALNPVFTVGGQIFDVIS  
YSKQDDTAKNKKELTDIAIKAIRDVFIPDPERILECYPHQLSGGMKQRICIAMALVTPRE  
LLIADEPGTALDVTIQDQIHRLRALVDEKQ TALIMITHSLGVVRELVDQIYVMYAGNIV  
EVATTNELFKNPLHPYTRGLMDCVPRLSGGGISAGIYGYVPDYVHPTPGCRFSPRCPYVK  
EICRVQKPLMLEVSEGHTVACFRYTDSTFEQHRQEESIGERA\*

>SPBDM4\_v1\_40989|ID:27158294| Binding-protein-dependent transport systems inner membrane component [Uncultured spirochete bdmA 4]

MTKAQLKEDLRLYWKFSRNKLSVVGLCIVLLSILCAIFAEIITPYPQHAKFVDFNQAS  
LAPCRAFICGTDIFGRDIFTRLIFSCRGALSMTVVVLSISVPIGVFLGLIAGYYHGTWAD  
TIIMRTADVFLSLPSLMLAMAIAAVLKPGMRSSMIAVTAMWWPWYTRQVYGMASLRNEY  
FVKNAELIGASRLHILFREILPNCLSSVFTKMALDVGWVILIGASLSFVGLGEQPPTPAF  
GQMISEGARYMPDLWWMTVFPALAIAFIILGFNFFGDGIRDMLERGR\*

>SPBDM4\_v1\_40990|ID:27158295| Binding-protein-dependent transport systems inner membrane component [Uncultured spirochete bdmA 4]

MLRFVVGKRLFEGIFVLIGISIMLFIARIIPGDPARMSLGPRAPQFAVDELKEMHLDKS  
LPVQYLYWIKGVLQGDGFKSINTKRPVSTDIKEFLPATLELVLFSGIFLIILSILLGLLA  
AKYRDTLVNMIIRGLSYGIAIPAFALAILLLLFGYVWQVIPVLGRLSSGVAAPIHITG  
LFAFDLITGNFTTFFDTLGHLLPALALATGPLFQEARLLRASLVNMGKEYISVATGY  
GLPSRVIMTRYLLRPSFIPVVPVMGMDLASLMGNAFLVEKIFNWPGISRYGMNALLNKDL  
NAISAVFLVFGAIFLLVNIIVDIIVASLDPRIIRLGAKS\*

>SPBDM4\_v1\_40991|ID:27158296| putative hydantoin racemase [Uncultured spirochete bdmA 4]

MKMEILVPVATNFRNAEILYEAQKTQSSNVDIGINNIKQGPTSIECDYDFAFAENYVEM  
AEEMEAGGANGIVLYCFAEPALSACKEKLNIPVVGLEASIAIASLLGDNIGVIAPMENT  
KKSFSRALGKKVRQIISLDLPVLEYADQEKVRTAIESKIQQLVQNDCDVIVFGCGSILGL  
DIEHLQDKYHLPIIPIHA AVAVCKYLMQHKLMQSKIAYPSPALGKVIH\*

>SPBDM4\_v1\_40992|ID:27158297| Extracellular solute-binding protein family 5 [Uncultured spirochete bdmA 4]

MYVEGRTNENEWRKIGSCMHQEKQHSIEYSKHIKSKTFSKPHYIKLLLLLVFWGIVLT  
NSSAAPQDAKNEKIIRIAVSGTPVIDPAVGLYVSSIALVNIYDSL VFPSASTAEMEPAI  
AQKWDISKDGKEYTFYLRKGVKFNHNGDELKASDVVFSTKRLLRIGEGYAYIFTDIKDVV  
ALNDYTVKFFLKKPFGPFLNLTNRLYLNERQVKEHIKPGNYQEWGDYGRDWLITHDAGS  
GPFMVKELVQQNYLYAVRFEWYGGKWDPNAPTAFKEIDTTEASTIRTMMRNKELEITDM  
WQSSENLNAMSKLPGVEIVMYSALANQNMYFNTKKAPTDDVNFRKALACLFDYDMIKNI  
FPGSSRSFGPVPIYVAGHVNTNQNFDLDAKEYLSKSKYANQLDQYPVEILCNSDVADH  
EKVALAFQAAARKIGIKVEITKAPWISIVDRVAQISTTPNLVSININAQYNEAGSMLETR  
YSSKSSGTFENGWLLDKNLDSMIEDSLSTSNKEERYKKYANIQNKIVDEICPTAWLGDT  
LDRVACQRDYVYWPVAEASRKGKYVSNYGYHYFFDMRVYPDKK\*

>SPBDM4\_v1\_40993|ID:27158298| Asp/Glu/hydantoin racemase [Uncultured spirochete bdmA 4]

MRRILWLNPIAHSDDHPIMKKMFQREALPDTEVMVKSLTNGPWHLGYHYGTLPESIA  
IFLNAEREGYDAAVMGCIFYDPGLREIREVLTTPMIVFPEETCTHLAATMGEKFSILVAEK  
KCIPAMSENLDYGLSKKLASFVSLDMNVLEFQKDPVVTQSRMMAAGKKALDDGAEVLIF  
GCTMEYGFAPKMQDTLGVVIDAAITSFKYAEFKADLRQRYGWSHSHKRCAYESPKNIEIT  
AWGLDKNAFDTQII\*

>SPBDM4\_v1\_40994|ID:27158299| conserved protein of unknown function [Uncultured spirochete bdmA 4]

MYDLELVGASIKLLRDMFGLQKGESVVITCDTESNYDVVDDATAQAAYALEGKPIIVKTPA  
ARGVGAADPDLPVKELIGLLSAADIWIEYNNEWIFYSTVFDEAFRKNKNLRYTNLVGAN  
PDLIMRNIGRVDIPLREFILKVEDISKAKHIRITPAGTDVEFDNDPNRAFYTADGYI  
RKGEIKMMPGQISWTPLFKTINGTIVIDGTLTPPLGKVNDPIRLTIKNDKVVDVTGGQDA  
KVFKTWLESFKDDRMFYLAHLSYGFPGAKLTGDIVEDERVWGSTEWFNGNIGPMLVPDI

PGGIPASSHSDGICLNSTVYLDGELLLKEGQIVGPTTEEIVALARLKLK\*  
>SPBDM4\_v1\_40995|ID:27158300| conserved protein of unknown function [Uncultured spirochete bdmA 4]

MRDRLIKNLCELVKIDSESGEEQEFHLHFLGEKLA SELHATI QFDAYGNLIAKIPAKHCSI  
HEPLMFAMHGDTVKPGKGKIPVIKGNIIYSSGDTILGADCKAGIAEFIEATLEAPHHPL  
EVVVTRQEETGMFGVKNLDFSLISARKGFLIDMDTIDAVVIGTPSRMIINVDITGKPAHS  
GMEPEKGISAIKAAANAITLLKDGRIDFETTGNVGIINGGLIVNSVPEKASVKA EVRSLN  
HDKCVHISETWKEIFEVSAKALGAKAEVSFTLDCKAARMSAESP MVQVTC DALRSIGMEP  
KLMVITGGLESSIYNEKGIETVPIGNVKA EHTVSENVSVEDMEKVIGVISFLFSHFC\*

>SPBDM4\_v1\_40996|ID:27158301| putative Transcriptional regulator, PucR family [Uncultured spirochete bdmA 4]

MAVTVRQIMKSEIMGKARIVAGESGLDRVIRRVSFIDSPFTA EVLNEPGILMPG DFFISS  
FFVVKDNDPQMMEMLKLLLAS ESSLGCVISKLFSELQV LIRFADEHNYPIVFINQDYPY  
GDMIRDILMLIVQDKEGMLIEMKLN DIVGLGKDEDKKVEEKMLKINNHFAKYVVA VYCRS  
FDLEDITTLVFLKNRINVIKEWLCVKFRDNIL IILTFGRSDQDNINTKLKYVFNQLKQVS  
KRYMAGISTVGD LGKANRVIMEAMIASELKPRHDQD TVCYRDIGSYKFLPLKDQPELLE  
FHDEIILPILEYDEKYKQNL MKTAVCFVDNDGDFSKTAEKMYLHENS VRYRLNKIMEILN  
FQDKNMAFYEQLFIAVKLHRILKGFEGDQTV\*

>SPBDM4\_v1\_40997|ID:27158302|livF| leucine/isoleucine/valine transporter subunit ; ATP-binding component of ABC superfamily [Uncultured spirochete bdmA 4]

MDTLLEIQNIVLDYGA VRALDGVSVTVGENEIVAVLGANGAGKTSLLKAVSGLRKPTSGQ  
IIFRGKDMANTPAFELAGQGIAHVPEGRRVFSTLSVRENMLGMYGVRRARDKKQLSTKE  
ERIYSLFPILKERNQLAGT LSGGEQQMLAIGRALVSAPALLLLDEPSLGLAPIIVKEIF  
EMIQKIHEEEKVAILIVEQNARKALKVASRGYILELGKVVLEGNAPDLTSNPKVRAAYLG  
GGMEGCD\*

>SPBDM4\_v1\_40998|ID:27158303| ABC transporter, ATP-binding protein [Uncultured spirochete bdmA 4]

MNITKTVLDYVTPAGQNKGRGPLDRKRPLLTA AIVSIAIAPFLPFIDNYWIDIGFYFG  
IYTLLGLSLNIVLGEVGLFDLGH TGFYAIGAYVTAILNTTFHIPILVLLPV SALVAGLFA  
WMVTAPVIHLKGDYLCIVTIGIGEIVRLTMINNPFGLTGGPNGINGIDTPVFIVPIVSSR  
QFYIYLIWALIAIVIFGLVRLQRSRVGRA WNYIREDEVAEALGINVRHYKLAAFVVGAGI  
AGMAGNIYASKQMSVSPESFTFMESLLFCIVLLGGLGSIPGTVL GALAITIFPEIFRPL  
AQYRLMFFGLALLVMMIFKPAGLMPRQRESGEKLR SALSKKRREAKGRLTGNDGCRKDMP  
PPGRAENLLEVKDVHLSFGGVTAVAGIDAEIEAGKITALIGPNGAGKTTLFNLITGIYKP  
QAGSIRFNGEDISGQSPHAIAGKGIARTFQNI RLFPSLTCLENVLSGQHCRGKAEFTASL  
LHLPSQQDEETQMLDFSLQCLDRVGLSDSTDKLAASLPY GKRRYLEIARALALRPELIVL  
DEPSSGLNDAETEELAQLLLSLLHDGLSVLLIEHDMHLVDRVSDHVIVMQSGKKIAEGKM  
CDMRKNPLVIEAYLGTEED\*

>SPBDM4\_v1\_40999|ID:27158304|livH| leucine/isoleucine/valine transporter subunit ; membrane component of ABC superfamily [Uncultured spirochete bdmA 4]

VTILLEQIVNGLTIGSFYALVALGYSMVYGV MKLINFAHGDLFTLGAFLGYTILASTSGV  
VTQNFGIWGGIAFTA AIVGMSVALAGILVERVA YRPVYPSGRLSLVVSALGMSIFIQNAI  
MAIWGARPRAFPASV VPSARLVVFGVPVTVLQIILAVSFILMAAIWFIVEKTAFGASVR  
ASALDRETATLIGIDVRKVIFFVFALGPGLGGVAGLMNGLY YRSISFNMGWNYGLKAFTA  
TILGGIGNIPGAMLGGLLLGILESLLAGYVSGAWKDV FVFVILIVTLIFRPTGILGEKTA  
EKV\*

>SPBDM4\_v1\_41000|ID:27158305| Amino acid/amide ABC transporter substrate-binding protein, HAAT family [Uncultured spirochete bdmA 4]

MAKKTNTGRRLVLEVCCVVLVSTVLILAGCGT SKSEKTIKIALQAPITGDYAYEGQMAKQ  
SVDVAAELINKAGGVLGKQVEIVVDDG SNPKDSALAAQKAVSQKVVA VIGSYGSSVTEP  
AADIYEKNKLVS VGYGCTAVRLTMDKERKYFFRT CGRDDAQGLFFGKYAVETMGAKRIAI  
MHDNSTFAKGVAD EAKKALDPYIAEGKTEIVYFDAITPKEKDFSA VVTKLRETNPDVWYF  
TGYYPEAGLLIRQARDAGLTC PFIGGNAAINDDFVKIAGLDVAKGAMMTQEPLVTDVTTD  
IAEQFKSLYMEKYNELPSSPWPVYAADALYAITGAITKSGKTDSNSIAETMRTKMDGVEG  
VTGPVLF TDRGDRKDVPYKMYIVDPEGKLVYVYNQ\*

>SPBDM4\_v1\_41001|ID:27158306| protein of unknown function [Uncultured spirochete bdmA 4]

VRPASTWWAVTVSRPTDGIIDTFLNEFSLIYVFIVPMKKARQAL TLSICLDP\*

>SPBDM4\_v1\_41002|ID:27158307| conserved protein of unknown function [Uncultured spirochete bdmA 4] MIKKVFLSDIILDVATGRMPFVEHSTSVLASIENGKVLGYISSNSVKDYKK\*

>SPBDM4\_v1\_41003|ID:27158308|bfmBC| Dihydrolipoyl dehydrogenase [Uncultured spirochete bdmA 4] LKRRCSLGQKTKNKEIGNHMGFSDVLIILGSGPAGYVAGIRAAQLGMKALVVDKVKSGGV CLNRGCIPTKALINQAEDFLLLAEEVEKTGVKVDKRSRQYKSVFETSARKASESLSKGVQYL LKKNVGVFIQGTARISGPHQVTLDDGRVLTGKNLLLATGSRPRQIPGFEFDGTDILSSDH ALFLEELPARMLIIGGGAIGCEFAHVMNAFGVEVTVAEMMDHLLPQEDPDTAIVERAFR KRKIDLRTGARVAGYQRREGELVVPVTLKDGTAEELVTDKILVVTGRAQNTDDLGLERVG IVTERGAVPVNAHYQTVVPSIYAVGDISSPQLAHLASAEGEAAVEHMAGKGPETHAVDPL LVPRGVYTDPOVAGFGLTETNAKAQGKRYAISLFSYRAAGKAVATGKTDGQVKLVYDPDT KEILGAGIVGADATEIHEVLLAKKSLKTGDIAGMIHAHPTLSEAIMEAARGAEGWMIH A\*

>SPBDM4\_v1\_41004|ID:27158309|gcvH| putative glycine cleavage system H protein [Uncultured spirochete bdmA 4] MAEYEVRAIPSYTKEDTWVRIMPDGMVKIGITDFAQKMLNEIVAVSLPDVGVSEVRQMQI FGSVESVKSVDVYSPISGKVKEVNEKVLLEPAILNQDPYDAGWLLVVEPAKLDEELKNL LNADAYKALIQEKGH\*

>SPBDM4\_v1\_41005|ID:27158310| putative CoB--CoM heterodisulfide reductase 2 iron-sulfur subunit D [Uncultured spirochete bdmA 4] MLEKYKQAVTVCSRGMCIIVGENGYICPVQQHSGGFDPSVARGRNQIARAILEGRLKYSD ELMESTFTCLGCDNCHEQCGRVDPRTGEKLIDEGKITRALRVDLVKAGYGPPEPLKAVDA NMEKVHNPFGPEGRRSAAWAAGLNLVPLGDTVYFAGCYAA YRNPKIARATVAVLQKGGVN VAYLGENEWCCGVPELWDGNAPLSEEVIQHNVEALKAAGAKRVVTSCAGCFHALKSDYPE IIGKLPFEVVHSSEVIADLIASGKITLDTEVATTFYHDPCHLGRYEKVEYPPRAILKSI KGAKFVEMPRNKNNAWCCGGGSVVA VAFPD LARDIADDRVQEA KGTAEAIVSACPLCEN GLTQSARKAKMEVYDLSVVVANAMGMHV\*

>SPBDM4\_v1\_41006|ID:27158311| putative D-lactate dehydrogenase (cytochrome) [Uncultured spirochete bdmA 4] MVTMAIRHHHLHDPLAAIVGSKYVADEDFVLETYSRDISAFPGSMPGIIVRPGTTEEVSE IVKLANRTGYPIVLKGGGQGGSGVTKGEPTRNIVIDTGRLDKVEVDIANLKATCGAGARN SRIDDALRPYGYANTVIGPYFTATIGGVTSGIAGAGFGKNVSSVGCNWDGHLGLKVVLP TGDIIITGAGPDSNIYRKGIEFREVTGPDLTSLFIGSGGALGIITEVAIKIYPTPKYSKA ASYVFDTMENIWA AQLKMAESPTALYTNLIMFEMANHMVRAMAGDMHGYGALFMAVEGDS EADVLDRLKEIEKICTGFGATKGTALDHYAATGATGTGAFVHDVCAMSCPFMTWESMST RSQSLEYAKGMLDILNNQFKEENAKYHTSGGLYTVPIANTMLIGITIHWD DTVPGVEEHN RKLWKAGADFMLKNGTFSAYA QGNHSSSISAWSP TYYKVMMSGIKKTLDPNNILNPGLWN L\*

>SPBDM4\_v1\_41007|ID:27158312| protein of unknown function [Uncultured spirochete bdmA 4] MKLSMWILADWLGEFAPSLHIEGKAGLTGTRLYSAGSPEQDPSAAIIGDAAQMLPRGSR ARTDAVLCLNGEDWLLFDHGDVGVILNACLEAFEFYNAWESA IKDVAYASPDAPFEKLLD LSSPVLKNPILVADWKGEVL AISRNHKPIADRETWGHVVDQGYFPSYTYDRLKNYPQFLE DMNRSEEIRIFDFPQFEYRCIHFSVRYNNETSLYVHIIEDDTKLTEGLIQVASVLKQ TIA IVLDRSNVMAKTNQIVSLFSDI IAGKYPERDALVWVRSQ LGW DKS KTWYLVIFRNFLPES FSETALLEVLKKQVRKGC SFIWENHPIMIVDCEEWSVAFPKIKKLLGSGGFCCGV SMPFD KQKDLPFALNQA KLSMELSDGKNTIAMCEDCAWSYIVKEIKSQITDMQMLHPAVKVLQEH DRQTGGQLTRTLYEYLRHERSADATSKALFIHRNSLR YRLDRIEELIDADLNDPDRMYI ILSYEIKEMTSS\*

>SPBDM4\_v1\_41008|ID:27158313| protein of unknown function [Uncultured spirochete bdmA 4] MERTATGNLFFERPILNSPYEYPKRHWELDKAKIVITNYHAFIPRERMELSKGGRSLLQG TGAPLQ TLETEGQVLQ RVMPELMGLRNVIAINDEAHHCYREKPDGEAKLSANEKKEAEEH NKAARVWISGLERVNRKVGLARVFDLFGNADQLDPLSIPEELQTALEALYGHYRKTFDLW EAAGIGGTSMSGEGTLVGALKNSSFPLFHTTE\*

>SPBDM4\_v1\_41009|ID:27158314| conserved protein of unknown function [Uncultured spirochete bdmA 4] MNPKVDEFIRDAKKWREEYEALRTIVLDCGLTENLKWGVPCYTFNEKNVIIIHGFKYCA LLFFKGALLADTDRLLIQ TENTQASRQIRFTDVREIVEKEPILKAYIHEAIEAEKSGAK VNFKKTA EFAIPEEFQRKLDSTPGLKTAFDALTPGRQRAYILYFSSPKQSKTREARVEKS



TQRILAGKGLNDQ\*

>SPBDM4\_v1\_41010|ID:27158315| protein of unknown function [Uncultured spirochete bdmA 4]  
MNQTLIHNLSIIVEDACKSDANVFGYGIWSNHIRPMIPVARRLADEYQADAMVHIQEIGI  
K\*

>SPBDM4\_v1\_41011|ID:27158316| exported protein of unknown function [Uncultured spirochete bdmA 4]  
MLMNRTRNAKLTFGIAIFAALALFLSVLPMGATESSSYQAGFAVGSSQLAQIEENIAEMK  
LAAQKRGVDYTTVLAAAREREALALQILPEKVEWMHGVADGSGISYEDVLVYNTSDRLMT  
GFVGECTTFIANGKALAAGAGSIISKNRDLGPNTISEVAKEEGRDYPSTEL YKAA YIDIP  
QASRTYSFVGSRSAGRWGYGMGINEFQVIVSDNDAPTRDELAFDGLHDNDYVRLVLER  
KTAREGVQILTKLTEKYGQAWNAIMFEIGDPQELWVVEITGRRWVARRYQDITYTARSNQF  
QITDDYEICSHDLLTYAQSQGWIGADVTKINFRAIYGTTELYPSDNNDIASRPAVETLYN  
TEKRYERAMELLQGIAGNISAQTLMPCARDHYDITYTLPSGEVLKLNQVPYYSTDYVYDRQ  
EWMTEPPTKDTVEVSIFPRAICHHA FEGTTAATGILIARPDVPNELGLMIHAYDQPCNSL  
FIPFYVGASSVDTRYSTPEAGSRFLTISKLAFGCYTTYHEGIRSVFDPYEKALFTEMPAM  
EKNYVDLKAAGKTMAAQAALDAFCAQHWTGKFELADTALKTMVEETAASSAWGR\*

>SPBDM4\_v1\_41012|ID:27158317| Peptidoglycan-binding lysin domain protein [Uncultured spirochete bdmA 4]  
MRRRVYAVVVILFALTTSFQDLKSTEFVVIYIPNEGRMVPATVCLPIGAPGETFPAVV  
MLHGTGSSRDEAGNGYKMLAPYMAQNGIASIRFDFAQGQDADYVEYCYTSGVSDAVAC  
TEFLKNLKVVDPSRIGIMGWSQGGSVAILAAARNPQYKALLTWAGALDMFGFFGDSLYQK  
AKVDGFVKIDLGFPPNLSLRWFEEAKDISLRDELKKFKGPVLA IAGSADTTVPLSNLD  
DIVANAGGTDKAKYLIDGADHTFNFTGDL SKFNQLKEVTTDWFKSKL\*

>SPBDM4\_v1\_41013|ID:27158318| AAA family ATPase [Uncultured spirochete bdmA 4]  
MIARQAADTLKRLEKGFVLCVTGPRQSGKTTLARATFPDKPYLSLEDPDIARLAREDP  
GLLESYRDGLILDEAQA VPEIFAYLKTAVDTPRPRGRIITGSQQFGLLAGAPESLAGRA  
AFVSLLPFSGEELKNEGKLPSDPFEAMVRGFYPPLYDREVSPYDWTNYLASYVERDVRS  
ILNVKDLGQFQTFVKMCATRIGQLLNLSMAVDCGLSHNTARAWLSVMETSGIVYLLRPY  
HENYKRLVKSPKLYFVDTGLAARLLGIKTAELFVHPNRGNLFESFIVSELLKARYNRG  
RDPDIYFWRDSAGTEIDVVYDGGPKVKAIEIKSGKTFTEFTKGLEAWMRYSAKPSDCA  
LAYAGERMKWKDITLVPWASASEVVKE\*

>SPBDM4\_v1\_41014|ID:27158319| conserved protein of unknown function [Uncultured spirochete bdmA 4]  
MTGREASIRARLKVVAAQKGITFQYATMLYMHEGFLRRLSASSYRDRFILKGGLLQCLS  
ESSPRTTKDIDLLGRGIPNDAAQMKVTVSEICQTPEDDALCFDHESLKFEDITEDNEYHG  
IRISIPCYLGNIHNTIQVDIGFGDAVEASFQKIDYPILVDGRSFSMLSYPPLASVVAEKFE  
AMVALADINSRMKDFWDVAYLLEHQSI SDEELLKALQATFQQRGTPIPAEPTVFSSAFAS  
SDMALVRWRAFMRSHLPFREWADVLSIIRARLEHLYRDIQK\*

>SPBDM4\_v1\_41015|ID:27158320| conserved protein of unknown function [Uncultured spirochete bdmA 4]  
MTRETEQKVLSIIAAKGGYARAGALRAEGIHSSQLSALVESGALVRLKRGLYALANGIER  
SELVDIQKAIPGGIFCLGTALSIHGIGTWEPPEIQLAIRRDYRIAIPDFPPVRLFSFSGT  
RFELGIIKESVGTGTIRVYDREKTICDIIRFRNTLGVDIAMEALREYLKEHTRNIPRLLE  
YSKLLRMEGPMRGYLEALV\*

>SPBDM4\_v1\_41016|ID:27158321| Helix-turn-helix domain protein [Uncultured spirochete bdmA 4]  
MSISFGQRLKAARVMAGLSMDGLVEKINNKVSKQAISKYENGLMMPDSSVLI AFADALGV  
GVDYFFTESKVEIADLNFRKKASLGKKA TDSLDERVRDALERYIELESFYQSAPT FENPF  
AGLVVSDRDDVERASATLREAWGIGPGAAVSHVVDLLEEHLIKVIELEDDDAFDGLSGRA  
NGNPFIVLNARMP TDRKRLTALHEL AHLCLDFDPGLRKA EKEKLC HSFSGSSFLPRAVLE  
RELGTRKSEISLFELAALKRHYGLSMQAIMYRAVSCGIISDYSYEQFSKMISAKGWRKTE  
PVIYPVPEQPRRFKQLLYRALS EDLISISKAAYLGRMSIDELRREQALEDVFSHS\*

>SPBDM4\_v1\_41017|ID:27158322| conserved protein of unknown function [Uncultured spirochete bdmA 4]  
MPEESSGKLRHLIVEGFSETENYKRPRGGSSVKVPEQDRALHSDHLLGQIKTISNDMLSA  
IQIQKKTGLEDDLGITIEFESFPEIKDAFDDLSFGRTGIELLNLRQIGLSTFATVFIPEG  
ELQYFIKKIDAYRLYGKDKNGKPRDNQKLVDTIKEIRTA SLRALWTD DENC FPAESEPAL  
WWEAWLPLRGDREKTVRLFR TMAAKLGLPTS KSDMSFPERTVVLVFADREQMESAITILN  
TVAELRAKETAEFFVELQPHEEKTWVDDLLKRTDYAEATDDVPRICILDTGVNRGHPLL  
GKALTSDDLHSDPEWEFADQDGHGTAMAGLALYGD LSEPLSSREHVS LAHRLESSKLLP

KDGANTGDEHLHANLTLQAVSYPEIAFPHRKRKYELAVSTDDYRDKGRPSSWSAAVDQLA  
ADRDNDEKTPRLFVIAAGNINDIHKWERYPTSKDEEGIHDPGQSWNALTVGAYTNKVEIR  
GERAQGYTAIAPRGDISPFSTTSKWDQWPLKPDIVMEGGNAGRDLFGAACLDLSLLT  
TNHIPSRRLLTTVNATSAASVVARMAAQIMAHYPELRPETVRGLIVHSAEWTKAMKLHY  
GIDENSSKDAYANLVRHCGFGVPSLERALWSMSNSVTLVVEDGFSPFREGETSICMNMQ  
YHTLPWPAEALSSMGETPVEMRVTLSSYIEPNPSSRGRSKYCYESHGLRFYVKQPSEKMN  
DFMRRKNGEFREEGTGYTSANDSTFSWLLGEKARHHGSLHSDIWRGTAVGLADCNAIAVY  
PTGGWWQKRPALGKYSSAARYSLIVSIKSPMADVDLYTPIETAIKTRIASKVEIG\*

>SPBDM4\_v1\_41018|ID:27158323| ATPase central domain-containing protein [Uncultured spirochete bdmA 4]  
MANAAQMVALLKSHLDGDDEHFYAVALQVAANEAKQGHDKLAEIRQLIDEAKRSKAKRN  
IPLNHPRGELTNLLVSYPEYRLSDMVLGEQLALQLKRIIKEHRNAVKILEHGLSPRRK  
LLLIGPPGTGKTLASVLAGELGLPLFQIRLDGLITKYMGETAAKLRQIFDVTETRGVY  
FFDEFDAIGSERGLANDVGEIRRILNSFLQMIQDSSNSLIVAATNHPEILDRALEFRFD  
DVLKYELPDERQAARLLQERLANYSQNYIDWGPIGAIAVGLSYGEITRACQDVIKDALID  
GKTLIAGPQLVAAIKERHELVEKLTIV\*

>SPBDM4\_v1\_41019|ID:27158324| conserved protein of unknown function [Uncultured spirochete bdmA 4]  
MARKIAAPKTTGGGGFVFEDDVCAWLMACILAGKSVFNPEYGPVRLDFQTKPAGWFLDD  
VLVTTKGDTTYHIEFSLKSNPQFTASKAPRDFVKTIWEQWLHIGSEVFDRSLDLMGIITA  
QLSTAA YTSVRSLIAKIRVADPDSFPRYIGNPNWANKNERNLFSSFACPTQLTADRYITA  
SDTVRLLQRIIFYQHDFGTTSPQSLNDSLIGCRDTLRNKSAIEAEKLNELRSIAAEYRP  
HAGSIGRNLVEKLRRHFVVDYDPHAADWVTLEGYSRRSMQLICDSIAGRIHLPQESTL  
AAISEVLSIERLIALTGDSGVGKSAVARSLFESRVSVGGRTLWFDAHSFECPMHTIEAN  
LHLRYSFENLFTNTSTSDSVLILDGLDSLYPDFAFRNVAMLLHAIYQEAPTAQWRIVLPC  
QSNEWPRVLECIIRAGFIDGQWKQIELKRISNKEKAKVRDAIPSFTKVLLQPRMADLLGN  
LKILDVVARHVEGVIDASSWVGESSVADWFWRAIVDVGQNAIKVRFVRCVLAQIQGDN  
LSRSVSIDDFPSEIDISPLDLLQKDQICIRTEDDLISFSHDLYGDWIRLHILLGHHTDLA  
SFLRSRRESPIWQRAIRLLGVHLLHSGGIEEWRTILES�DTKEDSPIYDLLLLDAPIFTT  
NPLPLLEAIEPDLANHGQNLRRFLSRFLVFATVADPMVLAFKVEGMDENVARATHRIP  
YWPYWLDVIRLLHTHKAEVAVAPYEIACVVELWTFKQKGRILRSEVAELGVLLGRYAL  
ESAEVYGGPDLHVERQKFFECALLSACEWPDEVAEIALRAANRQRLIGSSVASEESRII  
SEDQRIERFVHSASNIKVWPDGPQTRIDDAFQDAVLKSQVILALFDVRPDIAREIVLATL  
IEPPREVYWYDDMETLEELAIVEPHGWHPAFYTDGPFLSFLQMNFKEGLELIARLVDFAT  
SRWNEYEEKNNRDEQAYAQTQGEFEDEQDQQFSPSIYKGLMVGIEEEAREFYGDMSVYGW  
SAGLGNPPAAVEASLMALEQYFYIQLDKGKDVTSIEAVLARVKSVAFLGVLCVGVGRQH  
ALFEGPLRPLLSKPEFYEWINKMVLGREHLMIDAFKGNWFMEIAPKFHQLEHRKEDLR  
NIATFLMLQCPAMREYFNVRRIYLEASRAPDSSGPISPMVDQLITLLNPSNYQLYRNQDN  
SVELVNVEELRLQKHAPELRLINNNMLILTFPMQCQKVVLEEEQKLANEELDVMYKKWKR  
ICGLTKRDGEFSGDKELSENRYVSAMLAGIAVFLHYPDWCAQESSRNKEFITILRAVLEN  
PPDIDKYDSPYSVSKETWDCFAADA VVTLWAREPANVEWRQAVAEMVFAQHYAAVALLFA  
RCASMRTLFRDTSQRLRLAIEWAYIRKFMEAVPNLSRDIQDTNGAALLERMPDAIADWA  
QERVAAFVSGSIMPMLLDWDECDNRKRFSEIASTYLQGRPLPAIDLHLVRCVYDWLPLPE  
KALDENERHDWIQFVHSALKEVIKPRIATREPAHRRYPNEDERWFLDSIAAVLQLRDDE  
HADFFWQAIFDL YGEGHNWSELFIQALHRHALTQDQPPQSYVSLHRMVSALTDIKGKT  
RWPWYERVWDALIGVDMFSIRLWEPRHTVVIKNLSDTLDLWMAQVSSDENRLVNFASWLA  
RPAAEVRLHCLGWFLNHLVRRQSRSSDFNSAADAIAASLLNVTWTKNEIQLRNDEYAFR  
SFRKLLTWSGDQQNELGLDLLSRIGSL\*

>SPBDM4\_v1\_41020|ID:27158325| DNA methylase N-4/N-6 domain-containing protein [Uncultured spirochete bdmA 4]  
MANHTSKKSVETFRHGEATRNIPTAEYQSIMNAKEETPLRVAYERRNRDLDPQLVWRGK  
DSQDWSDLVVSAPPLYIQEKIHPKVLIDDLMRRTTEEAKKSEDSQPELFSDFNGLLDENAR  
TEFYQHEGHWTNRMILGDSLQVMASLAEREGLRGKVQCIYMDPPYGIKFNSNFQWSTTSR  
DVKDGNPDHITREPEQVKAFRDTRWDGIHSYLTYLRNRLTVARDLLSDSGSIFVQIGDEN  
VHRVRCLMDEVFGEENFISQIGFLTTTGKASAALDSTCDYLLWFGKSVEHLKFRQPLFLR  
DVKQDSNFRYDFTIEGNFISQSEKPYRIARMNPLTSQSGSTTTLFEYQFQNLKPKGKG

WKTNLEGMERLQKSNRLTSSGKTLGFVRPFLDFGAQSYANIWDDSRQSGFGDEKKYVVQT  
ATIVIQRCLLMTTDPGDLVLDPTCGSGTTAYVAEQWGRRWITIDTSRVALALARARIMGA  
RYPYYLLADSREGQLKEAELKGEAPSSQPVFGNLRGFIYERVPHITLKSANNTEIDVI  
WEKYQTTLEPLRTALNEALGKSWEWEIPREAGTSWSTAAKEAHRKWWESRIARQKEIDA  
SIAAKAEFEYLKPYDDKKKVRVAGPFTVESLSPHRVLDVDEDEGEFIDTTSEAEPGYGG  
ARNFTQMILENLKVAGVQQAHVDDKIVFTSLTPWPGDLICAEGRYVEGGSQASKNESVRP  
EKRAAIFVGFPEFTVSRPDLVAAAREAGDAGFDILITCAFNYDAHSTEFKLGRIQVLKA  
RMNADLHMADDLRNGKGNLFVIFGEPDVEILPAPDGQIRVRVKGVDVFHPNTGEVRS  
PEGIACWFIDTDYNEESFFVRQAYFLGANDPYTALKTSLRAEVNEDAWSTLRS  
DTSRPFAPKASGRIAVKVINHLGDEVMKVFRV\*

>SPBDM4\_v1\_41021|ID:27158326| Type III restriction enzyme, res subunit [Uncultured spirochete bdmA 4]

MEQTATGNLFFERPILNSPYEYPKRHWELNQGQPTQKIIESRRRAEFITPIPKPRVHRG  
AAGQAQLIFDEGKGLSTEKQQYDPTAVINQVRSHVDEWRQLPKNDWHVTPETARLLEHW  
RHHQFSGLRPFQCIEAVETAIWLTEVAPTQGKTGDTFLEYLAVASEDANPGLPRLALKL  
ATGAGKTTVMAMIIAWQTINAVRHPQSRFRTRGFLVVTGKITRDRLRVLKPNPDPSYYA  
SRELVPDMLPDLKAKIIITNYHAFIPRERMEVSKGGRSLLQGTGAPLQTLTEGQVLQ  
RVMPELMGLRNIIAINDEAHHCYREKPDGEAKLSADEKKEAEEHNKAARVWISGLESVNR  
KIGLSRVFDLSATPFFLSGSGYAEGLTFPWTMCDLMDAIECGIVKLPRVPVADNIPGG  
DMPKFRNLWEHIRTRMPKGRGNAGELDPLSIPVELQTALEALYGHYRKTDFLWEAAGIG  
VPPCFIIVCNNTSTSKLVYDYVSGFWRETGDGRKLFENGRLPLFRNYGEDGKSIGRPHTL  
LIDSEQLESGLDALEKNFRDAASDEIDRFRREIVERTGDIRQAENITDQDILREVMNTAGK  
PGRLGDSIRCVSVAMLTEGWDANTVTHVLGVRAFGTQLLCEQVIGRALRRQSYEMDEDEG  
HFCVEYADVGLIPDFDTAKPVVAPPQPPRVIVRAVSPERDALEIIFPRVQGYRVELPE  
ERLTAKFNEDSVLELTPDLVGPSVTRNSGIIGESVDLRLDHLETVREPTILFKLTQRLIE  
TKWRDPGEEPPLYLFGQLKRIAKQWLDTCLVCSGGTYPAQLLYQELADMACERITAGVSR  
AFADERPVKVVLDPNPTGSTIHVNFTTTKRLRWETDARRCHINWVILDSWEAEFCRVA  
ESHKVLAYVKNQNLGFEVPYRYGSETRTYLPDFIVLLDDGHGADEPLHLVVEIKGYRRE  
DAKEKSTMENYWIPGVNLSYGRWAFAEFTDAYRMEADFETRTGEAFSAMIDGAVSQG  
GKK\*

>SPBDM4\_v1\_41022|ID:27158327| conserved protein of unknown function [Uncultured spirochete bdmA 4]

MNPKVDEFIRDAKKWREEYEKLREIVLGLGLAEDLKWGFPCYTLQNKNVVLIHGFKKEYCA  
LLFFKGALLEDPEGILIIQSENVQASRQIRFTDVREIVEKEPILKAYIHEAIKAEKSGAK  
VNFKKTAEFAIPEEFQRKLDSTPGLKTAFDALTPGRRRAYVLYFSAPKQSKTRESRIEKC  
VPRMIEGKGLNEWTSMKEARHHDTKSDGQ\*

>SPBDM4\_v1\_41023|ID:27158328| conserved protein of unknown function [Uncultured spirochete bdmA 4]

MIRKATVNDASRIAEIQIFGWRNAYRGIIDDKILFAKLNIEKKSQSLRKVLEEGTDEWYV  
FEEKEIVKGAMVAGKCRDADKPEAFELWCLYVDPFMMRKGVGSQMLEYCEKMARDRGYKE  
NILWCLEKNGIGTGIFYEKRGYRRDGAQEIHLKATEIRYRKEL\*

>SPBDM4\_v1\_41024|ID:27158329| conserved protein of unknown function [Uncultured spirochete bdmA 4]

MDELLVKLLDGEKVKRWPKKNAEKEAVLHYIQGKIGKKNKIYSEKEINEILSWHTFNDY  
ALIRRMLYDNFLLETPDGRQYWVEDKREDAKG\*

>SPBDM4\_v1\_41025|ID:27158330| Putative transcriptional regulator (modular protein) [Uncultured spirochete bdmA 4]

MRRGRRESNPLHELKLSKARIIQNRDNKSDALNPIRYIVDINPIGYIIDIYLMGDIMQ  
TTIFTSMQLATMLKARRKTLRLTQKDVAVLVGLLPKTVSALETDPDRCSVESLRMLLSAL  
KLELTLSPKDESSRIVREAEW\*

>SPBDM4\_v1\_41026|ID:27158331|hipA| regulator with hipB [Uncultured spirochete bdmA 4]

MGRKSKTKGLVWWMNGERVGWWSILPSNIEHFRYDGSWLEFPDVRPISLMPIVTKDYIY  
KGQVVEAFFENLLPDSVDIRRRLQRRFSVETDSAFDLLAQIGRDCVGAIQLLPEGESPDQ  
VRTISAEPLEAGVARILRQVVASSGFGQAGDDDFRISIAGVQEKTALLWNEGQWCKPMR  
STPSSHIFKLPLGFVGMQADMSDSVENEWLCAKIVEAFSLPVAHCDIADFEDQHVLIVE  
RFDRLSADRRWWIRLPQEDMCQATGTPPGAKYENEGGPGMVRIMDLLIGSRNALVDRRN  
FLKAQVLYWLLAAPDGHAKNFSIFLEPQGRFSLTPLYDVLSSYPILGHGNNKLAPQKLT  
MAMSVMFGKDTHTKKWAHITASHWRTTASKCRAQGEIEGILHEVIEETPKAIEAVSSALPDGF

PSTVSEPILEGIQVAVERLRKGVPEV\*

>SPBDM4\_v1\_41027|ID:27158332| GntR domain protein [Uncultured spirochete bdmA 4]  
MSQSKKALSPVQKTTVVNQVMDQIRDLIASGVYKPGDKLPTEKELAEQLGVGRSSIRETM  
KVFNYLGVLESKSAKGTFCVSRSSISREVLTWALLGEDDIKMVIDLRAAIELWSYLQLT  
ERFRTAPEASTTIVKDLNEILDTMSKAIADQNAPAVIQADYDFHRRIIAGVSNLSLFVEFY  
DILRSFLLKEIDASQSRYMDRSKILEHRALLDALESGDLQKAASYQDHINNIKNLG  
KDTF\*

>SPBDM4\_v1\_41028|ID:27158333|gap| Glyceraldehyde-3-phosphate dehydrogenase [Uncultured spirochete bdmA 4]  
MAKVKVGAVAGYGVIGQRLADGVALQGDMELVGVADVAPTLVSRALREKGMPLYKFFLAAPD  
KREELEKAGIPIGSLEDLVQRVDVMLDATSAGVGAKNRALYEKYGKKGIFQGGKNSVA  
DVFFHGYANYEKGLGAQFLKLTSCNTTGLIRAVDCLDRKVGVEKVAITIIRRVADPGDYH  
RGMTNALQIDKAPSHQALDMMTIMPQVEATGILVHTPVTHGHIITVVATPKKSVSPENVI  
EFFREHPRIRVVSLAEGFLGNASLFRYARDLGNPRGDMYEIAAWEDSVVMSGKDVMFAIN  
IPQEA VVIPENMDGVRACMRMEEDRIEATDTTNRYLIGIGKWRNLG\*

>SPBDM4\_v1\_41029|ID:27158334| Phosphoglycerate kinase [Uncultured spirochete bdmA 4]  
MEGPRLKIRPTELALAGKTVIFRPDINSPVDPATKRIVNTNRIEKTVPPTLNLLERGA  
VALIAHQGDTLDYQNLPLAEHAEILSRLTGKRISYIDVCGPAAQAQAVKALSPGEAVIL  
GNLRYLAEEISTFETVVKLSAQEMTKTWLVRSLAPLADYYVNDAFAAAHRNAPSMVAFQE  
LLPSAGGIQLMEEYTALKSVMDNPKRPCVYVLGGAKISDAFDMMRKVLTEGSADHILTAG  
VTGIVMHLARGEDFGPVVTKFLADRSLDVFPEAKALLEEFGDRYVLPVDFAYDANATQS  
TAGASPQRRAEAPIASLPKDRMFPDVGHRTIELFKEYIAAAGSIFVNGPAGMYEHEPWS  
GTRELWRAIAAAPGYTVIGGGDTISAATKFTDLSKYGYVCTGGGAMVRFLAGKRLPLIEA  
MEKA FERDLG\*

>SPBDM4\_v1\_41030|ID:27158335|ytsJ| putative NAD-dependent malic enzyme 4 [Uncultured spirochete bdmA 4]  
MDIDLDLANLGEAFPADFSPEQKAQAQTLFLKKLALSAHEFYGGKMQTIPKCGFYGFSWF  
NTWYTPGVSAVSTAIRDDNLSFSLSNRGNLVA VVSDSTRVLGDGDCTPPGGLGVMGKA  
MLMKYLGIDAVALCVDSRNKEGVHDPDKIIEFVKMLQPSVGAVNLEDISQPNCFKVLDD  
LRESCEIPVWHDDAQGTACITLAGLLNALKLAGKKLSEAKIVLLGAGASNTTIARLILAD  
GGDPAKLVLFDSKGLHAGRKDIEEDRRYRKYWELCVATNPRRYASEVEALKDADVLIAL  
SKPGPNTVKREWIRAMAPKSIVFACANPVPEIWPYAAKEEGA YIVATGRGDFPNQVNSV  
CFPGILKGALLVRARKITDGMAITCAHSIADFAESRGISTDNIIATMAETDVYAREAADV  
AVQAVKEGVARRNITWQEA YDSAKADIAASRAMFDTMQAQQGHIGVPPASMLNEAFAWAVQ  
QVRG\*

>SPBDM4\_v1\_41031|ID:27158336| conserved protein of unknown function [Uncultured spirochete bdmA 4]  
MRIDLPHYRNGKIGLDLPDSTEVIEPNNKETDDSPRDLVRQALEKPLDSPDLDRFFVGAVH  
PLVIVNDGTRPTPTS VVLDVIGDGLACGARFIVATGAHRAPTEDEYRFIFGANYGRFRE  
KTEAHDARRRESLVFCGTTRAGTPLWLNRRVLEADRILVIGSVEPHYFAGYTGGRKAFLP  
GVAGYETIQANHLALQPQAHSLALDENPVHRDMEDALSSIKAPVFSVMTVLDKDQRIY  
CASGDLTASFMAAVRSANEFVAVPLRRRFDVVISVARSPMDINLYQAQKAIDNGALAVAD  
GGVLILVASCWDGIGDSA YLDLLGSASTPQEALDKIAAGYKLG YHKA AKIAQA AERIRLV  
AYSELDRATLKRAFITKADSLQESVDTALAGRGP GAKVAILIDGTLTVPIIE\*

>SPBDM4\_v1\_41032|ID:27158337|tkl| Transketolase [Uncultured spirochete bdmA 4]  
MNKEALKKIALSVRSLSMDAVQEANS GHPGLPLGAAELGAFLYGEAMKYDPSDPIWIDRD  
RFVLSAGHGSMFLYSMLHMAGFGISLDDIKCFRKVGSPCAGHPEYDADLGIEMTTGPLGQ  
GVSTAVGMAMAETMLAAKFNTEKRKIFDHYT WVLVGDGCLQEGIASEASSLAGHFKLGKL  
IVFYDSNDVTIDGPTGISFTEDVAKRYEAYGWKVLKGD MYDFAGIEKLVAEAKADIDRPK  
LILKSMIGKGAPTKQGTNKVHGSPLGEEIARAKETLGIPKEQKFWVAPEAYEYFGAYK  
QGLESRHARWTEEF EAWKREEPALARELDVWYSGDPLSEVKMPTFAPDEPLATRAASGKV  
LQAIAAAWPNFVGG SADLTSPNVSALNEVADYTPENRSGRYIRFGIREHAMAAIGNLML  
HGGLRPFVATFLSFVDYLRPALRLSALMKLPLVYVLT HDSIYVGEDGPTHEPIEQLASIR  
AIPNVLVLRPADGEETA EAWSIAMKRKDGPTVLVLRNVPFLKDDPDWRADMAKGAYI  
VRDTKKTDPVVIVATGSEVSLALEAAKL VPAKSVRVVSMPCREAF LRQPERYQAELLPKT  
AKIVVAEAGVAQGWGEIAQRANIFSIDRF GASGPAGDVAKHLGFTVERLSEIAR\*

>SPBDM4\_v1\_41033|ID:27158338| conserved membrane protein of unknown function [Uncultured spirochete bdmA

4]

VAFTPDICLLAIGIEFFCFFIKGLAAFGDPLISTPLLSMIMDNRVISPMLLLGTPINAH  
MAWKNRKAFTAKTVVPILIAILCGIIPGVVLLKYATSWTLKACLALVIGIGVEMLVDR  
TKPAKNSKVMMIVASFFSGVTAGLYGINLFFVAYVERTTKTREAFRGNVCFIFLVENIFR  
LIVYIISGVLTRVLTALATMPGAFLGFFLGSRVDKRLSERAIRYIIAMFMAGGVSIL  
VKALVLKS\*

>SPBDM4\_v1\_41034|ID:27158339| Transcriptional regulator, XRE family [Uncultured spirochete bdmA 4]

MPSNPTDFEADNVKVTLGARIRAQRTKHNMKISDLAELTGLTSSTISQVERALISPSIAT  
LKKICDAMDITIGSLFEDKDSFNVAPEEQKAPSENLAETELASHLKLKLYTSVHLMGLSP  
VVHKENRKFLLSPSPGIRFYLLNPNSLGPVELIYNEYDPTSTGPALYTHPGSECLLSG  
ELVVQIKDATYVLKEGDSITFNSSEPHSKRNDSDTMCTCIWANNPPWF\*

>SPBDM4\_v1\_41035|ID:27158340| Xylose isomerase domain protein TIM barrel [Uncultured spirochete bdmA 4]

MNIWNYALSSADRAPDTAPILLRGDICHNLKTAAVLGYQGLEVHTREDVSLDYDEIGRTA  
AECGVCVSAVVTGRLNTQGGVNLIDDRPYISYAAIEGLRKYVQMAARLKTNLIIGWIKGQ  
IPEGTDPYPYLERLAGNLTVVCAEARDQGVKIFIEVINRYEANIFTTAQETIDFLEKWKI  
PNCYLHLDTFHMINIGESKPVEAIRACGGRLGYFHVADNTRLYPGSGTLDFKSYFSALKEI  
GYKGFVSVECLPCPDGETAARAAIEYLRECESDIKTEK\*

>SPBDM4\_v1\_41036|ID:27158341| Creatininase [Uncultured spirochete bdmA 4]

MSKWQIPARGGYMESNRGVYYQNMTNKDVAERLEKNDVILIPVGSTENHGASAPYGEDTY  
LDTRLCEQVAVATGCTVAQPIWYGSHPHYHLLGMPGTIMPEETLADYLCYVFAGFWNTGF  
RKMIVVNGHGQDYVIPLAIHKFGKKFQVPGIVLYVHFWNAAKNPLTGLTDLATKDQGGVY  
DAFPIHADEVEQSYALALFPELCRQENAVATKPSMPLPPGHINNSAENGVGPIKWYNAYG  
SVGMECICSPEGVIGDPTKANADKAKAGIEHILDYMERLVKDILTDYPAGKLPPIEKVTQ  
RRREDIEAVIKGPSNGGRHIYTLTY\*

>SPBDM4\_v1\_41037|ID:27158342| Alcohol dehydrogenase [Uncultured spirochete bdmA 4]

MDKTMRALVADGPGSFSIQQIPVIPERDEVLCRIKSV AICGTDPELFAGKFVDIGWPPK  
YPFVFGHEWAGEVVA VGGDVIDFAVGDRVAGEAHC GCGHCENCRKGDYTVCLNYGKMAQG  
HRHYGFTVQGAYA EYGAYKTKALEKMPDSVSFDEATMCDTAGVALHGVELGNV GSCQTVA  
IIGPGPIGNLAMQICKAKGARTVMIGRRLLECAKECGADHIINYESSNPVEEVK KLTNG  
KGADVIECAGTPAAISESLFCTRKNGNDVLISLPKVRDIPMSILTIVQNQIHVIGSKAN  
PNCSRQVLQMIGSNMINAKRLITHQFDLSEMEKALDIFVNKKDGVMKVIIHP\*

>SPBDM4\_v1\_41038|ID:27158343| exported protein of unknown function [Uncultured spirochete bdmA 4]

MRKKILGVVLLVLLMACSFVNAQGTAGKKNIRVDFLVKLLSSAFWTD MVNAAQAQVDKYGW  
KMKVLC PITADSNEEQIQLLEQALLDPPDVFLIAAADSKGIAPAIEEINKAGIPIIAVSA  
KIIGEGLRYETFGVQFEDLAVSAAQALCQKLNGKGNILYLOGVTGASSAQDVDK GAYAT  
FKKYPGITVLASEPADYQRQKGMTVTQNLLQKYDKVDGIFAANGESALGSIEAIRQLGRK  
GIIVTTINSSEELVRAIVDGKLYALADDVSWKVGQQA VVAACKYLDGETLSKDNFQQPVM  
VTRDSANLAEYKTKYGIK\*

>SPBDM4\_v1\_41039|ID:27158344| putative ribose/galactose/methyl galactoside import ATP-binding protein [Uncultured spirochete bdmA 4]

MNGDQQATLLSIRNVTKVYPGVKAVNNLSLEIRKGEIHIIVGENGAGKSTLVKIIAGLIK  
QSTGDLIFEGEKYSPNSVLDAQKAGINMIHQELNLMQDRTVAQNVFVSREPVKTRLRVVD  
TKKMNSSCNKILADLGLCFDASMLIKDLSIAQQQMVEVAKAVSRENKLLIMDEPTSSLTQ  
KEIDLHFAITRLLKSQGTSHIYISHRMQELMEIGDRITVMRDGALIATKNISEISMPEII  
KMMVGRKIENVFSRTETT VGEKVLVNNLTGLRFRNVNICIREGEIVGLAGLIGAGRTEL  
AKAIYGKDPIESGEVLFYGGKINRRNYTTRNAV DVLGISFIPEDRKAEGFFSGMSIKTNMM  
EASWRFLFRRGIVKNSVLDRTAE EGVKRLNVATPSVEKNVDELSSGNQQKVIISKWL VHD  
SKLFIFDEPTRGIDVGAKAEIYSAIDELSKKGGAVLMISSDLPELLGMADRIYVMKDGEI  
CGEVRRDAPDFTQEKVLSIAIGESQIA\*

>SPBDM4\_v1\_41040|ID:27158345| putative Ribose transport system permease protein RbsC [Uncultured spirochete bdmA 4]

MNDILKKVPGLMWGSLLMVMFFVIFAPNYTNQRNIINILQNSAIIIVSMGMGLTILSGQ  
IDMSIGGVMTASAVISAMYFAHIQSPTALDILVTFLIGIGVGSVFGFLNGILIARYKFNF  
WLVTFAMMSISYGIAQVVTGGKVISGFSKSFNRNTRFSLEGIPMVVYIAVIVSLLMFFLT

YKTKFGMHMYAVGASEKCAAQSGIRVERIRFLIYLLSGLLSGFGGVLLVSKTNFASANVA  
SGQEFTAMANVIIGGISFDGGKGGLLGAFAAGSILTAILNGLQLMGLSNYWQQVFTGIFI  
LLIIIDVISQRMKKTKNTRRVYKHA\*

>SPBDM4\_v1\_41041|ID:27158346| Branched-chain amino acid ABC transporter, permease protein [Uncultured spirochete bdmA 4]  
MLNKTIHRHLNKYSRLLLLIALFIFFSIFTDSFWSPTNWSNFANIMFQQAPFTVLLSLSM  
TISIILKGFDSLMSGADIALVSCIVGFVLRASHPLLAILAALGMGALIGMGNGLLITKVG  
IQPFIATYSMNWIIRGIALVLLGGSQIYDFGPTFRPLFLNSPYTFLFIAAVICAFSLIF  
SKTIFGKYIYAVGTNMGAAELSGINPNFVQFVAWTLGCVILSVDAVMYTANLGVAEPVIG  
DSFVMTAIAASLIGGTSVSGGVGGVYNAVVGALILVVLTNNGMIHLGVPSAWQQVVVGFVI  
VLSVFFEHLMNRRKED\*

>SPBDM4\_v1\_41042|ID:27158347| putative 2-(hydroxymethyl)glutarate dehydrogenase [Uncultured spirochete bdmA 4]  
MESVGFIGLGMGSRMAKRILDKGYALYINDVIRDNAEALVKQGAIVVSNAEELVRKTNV  
IFTSVPSGSNLKEIIVGKNGLLNSASQDVLIDMSTIAPKDSAEIAAILDTKKIGYLRAC  
VTGSTAFAEQGTGLGIMVSGSKEIFEKELHLLKIIGNRQRYLGKEEQSRYMKISINMMIGT  
AMQMLAESLVLGEKAGIDWEMMVECIADSAAATAMIKAKEVPLKKRDWTAMSTVEMMEKD  
MSIALEIAAEEGLALPVTATRQFYSAMSSSGYGKVDYSGILLVNEKLNIGKAEK\*

>SPBDM4\_v1\_41043|ID:27158348| Alcohol dehydrogenase [Uncultured spirochete bdmA 4]  
MVSMMREALVLTAPKEFEIKQIPVPGIGPNEVLCRVKSAICGSDPGFISGKTAGVWPPHY  
PFTIGHEWSGVVETVGSNVTMWGKGDVVEGEAHNGCGICRNCKEGRYNLCLNYDNPKTEH  
RHYGHKDQGAFAEYGFNQKCLTALPENVSFDIGAIVDAAGTALHVETLTDITPGGTVAI  
IGPGPIGLIAGKVARALGASRIIVIGRGPRLAKAKELGIATETVDFESQDAVKAIEDLTG  
GLGCDEVFECGATGTLQAIHIVRRGGKIGLVGIPAPGNMESIPNRMVVIKEITIQGSR  
ANPNVTDKLLSMLAAGTVNFDDIVTHSFRLQDFRRALDTFLDRSTGALKVIVHP\*

>SPBDM4\_v1\_41044|ID:27158349| Myo-inositol catabolism protein IolB [Uncultured spirochete bdmA 4]  
MLDNPAFENGQKTLQCMNGKNAEMLMNIYVKRCRKGEKIEFLESNETAILLRGEVRF  
WGDAATGKRESPFEWKPYCLHFSKNTKASVNALADSEIIVQQTDNAKEFPAVFYTPETC  
LYQEFQKQWNGAGHRIVSTMFDLNAPYSNMVMGEVFNQPGKWSSYPHHHPQPEVYYY  
QFDHPEFGGACFIGDNVFKSTDGSAVITPGNAHQVAVPGFTMYVVMIRHLDGDPWDK  
TRIYVPEYEWLAKAQ\*

>SPBDM4\_v1\_41045|ID:27158350| putative Histidine kinase [Uncultured spirochete bdmA 4]  
LNRRIILQLEDIHARYTNIDALNGIDFNLFEGEVHGLYGEHGAGKSTLAKVISGAISRVS  
GNYYLEGKKNEKMTIRNAIKNGIIMVYQDTLNTPHMTVRDNIFMRNFYQVNYFGKKYTE  
FDKLLSSFFQKYSIAFDTSKYASTLSIQEQYFIDVISVLVNTPKIVIFDEISNRLQHDEF  
QIISRIMDLKKSGETSFIFITHNMDEILAFSDRITLNRNGLRIATEKTDDLKSKLQLS  
FSAVYKQSTLTKSNATESFIFETLQNVTNHLSEGLIIFDENFSLKLNINFAIEIFGINDT  
FGYNNILSIIKEKLPEYSDSIIKILNRNPFEVHEVFSNAKRLSIRCIPIDLFTQNSTYF  
CLIVEDLTMKFQIQGYLLDAEKMTSVAEIAAGIAHEINNPLFIKNIYELIAINLHDREP  
LSYIEKINNEITRIMRCSGVLFSKIKKTEKISANVCDLVDEALLLDYQIKSKDIKVI  
KTYFSDLNLLCDETALTLCFVNIKNSVEAVLDKGQIEISVALVGGNVAIEITDNGYGI  
SPENLEKIFSPFFSTKVGKKNAGIGLSISKNIIESLNGSIDAFMTSDSKTCFRILLPAER  
CLG\*

>SPBDM4\_v1\_41046|ID:27158351| Transcriptional regulatory protein [Uncultured spirochete bdmA 4]  
MTENIRILIVDDEEEVCISLSKLETKGFSVVYSFDTVHLASIIERNQIEVVLLDVNMPE  
KDGINVLQEIHLHFPLMPVIMISGFASVNNVLKTMRLGAINFYEKPIDIPSLVNEINTLI  
AAKRKKHNFVAEKNVITRNKEVIHLLDLVNKYAVTDAPVVIMGETGTGKEVFADLFHRLS  
RRSAKPFIKINCAIPDTLLESELFGEYKGAFTGAMDQKKGKLELANQGTVFLDEIGDMS  
LNTQAKILRVLEEKQFMRVGGKLNQIDCRIIAATNKNLKNLIERKDFREDLFYRLSVIT  
LELPPLRERREDIPLAQYFTKVFSDMYGKNINLSDAVVAGMLRHDWPGNIRELRNFVE  
RAVIFTSDTLEIDNCATLYSKRVDFENKQVNPRLSREVIREALLQSDWNKIKAAQLLG  
ISRTTLYNKIEEYSIEP\*

>SPBDM4\_v1\_41047|ID:27158352| putative N-acyl homoserine lactonase AttM [Uncultured spirochete bdmA 4]  
MKKAKVHILYYGSHMSPLSDLISGAGKNGEKILTPSLGIFIDHPEAKIVVDTGWNDLDPQ

IGKDMGHIYSEEHTPIGQLRKLGVNPAIDLVLTHMHFDHVGIRHFPKTVLVRRAEL  
EKAFVPPRNSNFLYLRSDFDVPDVRVYETIDGDMDYQLCPGVLLLATPGHTLGSQSVLIDT  
EEGSVLYAGDAIYLFNWEKHLMPGICYSQLQMETMSKLRGLGRFHLIPGHDPKVDVNK  
IYG\*

>SPBDM4\_v1\_41048|ID:27158353|rbsC| Ribose transport system permease protein RbsC [Uncultured spirochete bdmA 4]

MTHDSTMKRLSGKLGFLKGGVLFVAVIVLVCVFLSICSPNFLT VGNLMIVLRQSSYIMIIA  
FGMTMVIGMGDIDLSVSAIAALSIIAAKMLVAGSSTFLSCVTALAFGFTLGFFNGFLIS  
VLGMTAFIATLGTMSICRGVAMLITRGIPIFGLQFPSFQFLSQGFISIVPFPVLSIVML  
ACAAFLIKKTALGRYILSIGSNVEAARLVGINIKYVRVLFVFSICGLLSALAGLLTSRLE  
AASPVAGDGYEMDVIAATVIGGTSLVGGKAKMSGTFIGALVMGIVRNGLTLLSINVFWHR  
VVLGAILISVEIDILSQRKKD\*

>SPBDM4\_v1\_41049|ID:27158354| putative ribose/galactose/methyl galactoside import ATP-binding protein [Uncultured spirochete bdmA 4]

MERQYGEVPPFAMCL SARERVVMHTNRKCSNAPIVSVKNLCKTFPGVAALKNVSFDVYPGE  
ILILLGENGAGKSTLMKILAGAYRKTSGSICVGEKEVEIQSIKHAKKLGISIVYQEVALI  
PDLNAVSNIFLGKEDRKILKKNYFGLVDGKKMKEKALALLSEFSVPIDLNTDVRDLPLGQ  
KQIIEICRCLADNATVLLI DEPTAAL EEREREYLFKFIDRLVEKGVAIYCSHILEECLK  
IGDRVIVLRDGEKVNDS DIGQVTLGGLIDKMVGQELKEQYPKEHIALSDREVLSVKNL SN  
KHNFKDVSFSLYESEILGIGGLDGS GKYELIRSLFGVNRVLDGEVSVHGDTLRANNIINS  
MKEGFALFPADRKSEGLFLDQPIGFNLSVANLKKVSNGWINSKKEKDFIRKFVDVLKIKC  
SSEKQLALDLSGGNQQKVM IARWLFREPTILIFEETRGIDVKAKTEVYHLMGDFVRKKG  
SIILVSSDLPELSEICDRVLIMFEGKITKELAGKDLTQEKILEFSISGRKNS\*

>SPBDM4\_v1\_41050|ID:27158355| putative ribose ABC transporter, ribose-binding protein [Uncultured spirochete bdmA 4]

MSKFRV GILCLLVLSM VSLGWAQE QRAADQQLISVKEDGTFDKTGLEVP PMKKAHLKIGF  
SPNAMNTQYDMVISGCKEAI SKLPDPSSVDFVIQAPTNHSDTAEQMDIIESWIQQKYDVI  
AVCSVNDMAMYPVYRMAAAAAGIPIHFNT PSSSLVDPFFVSTVTCNQVMAGQAIGEA FVK  
RYGKKDTNIVVIEGLVGTPH NTERINGFKKAIAGVNNFHIIDMQAADWVRDKAQTVMEDL  
LTKYGGKINVVWGM YDEMALGAVSAIKSRGLTKQIEVWGYDNTEDAYNSILRGEMFGTV D  
TASKQSGRDLINSIVKYCMKGEMIPKQVYVPPVYTRDNIKTFNTSEYK\*

>SPBDM4\_v1\_41051|ID:27158356|adh| Alcohol dehydrogenase GroES-like protein [Uncultured spirochete bdmA 4]

MKAAVFTQFRTPLSISEVPDPEVPDDGVVLSVDATGICRS DWHGWQGHDPDIRLPHVPGH  
ELAGTIVEVGKNIRNWKRRDVRTMPFVAGCGHCFPCLTGNQQVCDHQFQPGFTHWGSFAE  
FVAIHYADMNLVRLPDTIDSLTAASLGCRFATAFRALEAQAKVRAGEWVAVHGCCGGVGLS  
AIMIAASMGARIIAVDIQDDKLAMARQFGADIVINAREVPDVISAIRDATDGAQVSM DA  
LGSRQTCFN SIACLA KRGRHVQVGLMLADQRHPEVPMDLVVARELEIYGSHGIQAHRYGV  
LLGMV ASGRLHPERLVTGRLSLAQGIDFLQKMGQFPGMGINVITTF\*

>SPBDM4\_v1\_41052|ID:27158357|ymdB| conserved hypothetical protein [Uncultured spirochete bdmA 4]

MKELYRSPDGCCIVS VGDITTLACDAIVNAANSSLLGGGGVDGAIHRAGGPEILAE CRAL  
RRGPLPDGLPAGQAVATTAGRLPAKRIIHTV GPIWRGGTHHEDETLVSCYRESLALAARE  
GLESIAFPAISTGVYGFPRERA AKIAWRTVRDFLESALKPPCGPSPSTPGTSCPRTVWFV  
FFSDEDARLFLKTNQLS\*

>SPBDM4\_v1\_41053|ID:27158358| Response regulator receiver protein [Uncultured spirochete bdmA 4]

MAKFSNKVRTFSALEVARLCGVVNQTAINWIRGGHLKAFSTPGGQYRVYSEDLVSFLKER  
NMRVPDELRDDLTMPVDPGLALIVDDD KDLNTILKRLLEKIEELRVAQAFDGF EAGR II  
AERHPAIVLLDLNLPVDGVSLCKKIRSDESFGQPAVISMTGIAEEEEAQPQMMEAGADAF  
FAKPLNFDALIAKIRELLEKHKNPRAE DEG\*

>SPBDM4\_v1\_41054|ID:27158359| conserved protein of unknown function [Uncultured spirochete bdmA 4]

MRPPAPKFLQFSATSRNVT LIMDSTTTFDAGTIEALS VDELAI AQKIAGELGVRLSQVQA  
VLSLSAEGCTVPFISRYRKERTGNLDEVQVRDCIQKFESNRNLEERRLEVLKGVSAQGKL  
DAFLYGNIRNAATL TELEDLWAPFKKKKTRGMLAQEKGLGPLADLMAKAAIEEVVAAAP  
SFIHSDAEHPELSVADADESLAGARDVLAERLSQDTEIRAYVKQVVLQNGSLSVKIGIDD  
EKREQSTYQMYWDYREPLSTLKHHRVLA VNRGEREGELDVSI EIDLLVEDRVLERVRPA

NAQHKEAVADGLARLLLPAVRREIRSGLSENAESHAIEVFSTNLRNLLMQPPLRGTRVLG  
IDPGIRTGTKCAALDETGKFLDYFVINQETKPEQGGKNIAAAVAKHRLSVVAVGNGTGSH  
EVQKLVAETVTENRLECRFAVVDEEDGASVYSASDLAREEFPELDTIRGAISIGRRLQDP  
LAELVKIDPKSIGVGLYQHVDVQKQLAGQLDEVVGSVVNQVGVNLNTASYSLRYVSGIN  
ASLAKKIVKFRDASGVIRNRSLLEIPGLGEKTFEQCAGFLKIPESGNSLDNTWVHPENY  
ALAAEIQPIVKSGRDPREERVLLKEKYGVGDITLDDIIVELKKPNRDPREDLPPPLLQQ  
GVLSEFEDLQPGMKVKGKVKNVVDFGAFVDIGIKESALIHVSEMGRFVKNPMEVLRVGD  
KEFTIISIDPLRRRIGLSLRAQAKAQAQAEGSGTRQSAPDAAPSGRAGNAPRDGNPRQ  
DRPLAGRPAPRGHPQHGGEDDGMTYNPFADLLKCRK\*

>SPBDM4\_v1\_41055|ID:27158360| Acetyltransferase family protein (fragment) [Uncultured spirochete bdmA 4]  
LRLKTNIVRVEAHRFYENMGFERTKTQYTYVKKLAPDSKAR\*

>SPBDM4\_v1\_41056|ID:27158361| Metal-dependent hydrolase, beta-lactamase superfamily (fragment) [Uncultured  
spirochete bdmA 4]

MAIIFEPLAGNTFVALGPTNLGLYVFRQGDAAARAVAIIDSGGDEDAGRRIVRECERLGVNL  
SVLLNTHSNADHCGGNAAVYKRTGCAIASTEIEAAFLQ\*

>SPBDM4\_v1\_41057|ID:27158362| Beta-lactamase (fragment) [Uncultured spirochete bdmA 4]

MAPASRATHLLEPPCELALDEKGSIDIRSVPMVPAGLRDAERARSDLVPVAGTEGLHII  
SLPGHYFGMVGVMTDPDGVFFAADALAGATILEKYNIFFFYDVAAELETLSMLERIEAEWF  
VPSHAEPVRDIKPLVALNRAKIFEIAEVIVGLVRGDSSLIPEKRARDGASLEDVVAGVCN  
RYDIILNADQHVLVGSTIRSYLSWLCQDQNLQLEYGFEQNRMTFRVKQ\*

>SPBDM4\_v1\_41058|ID:27158363| exported protein of unknown function [Uncultured spirochete bdmA 4]

MSRKKPAIQARRAQKNGALSKSLRGVVFLVFLFYMLLGGAGIGTAFQAQGHLEVELGHPVY  
AVIETAELRGVVTRLSSVKPYTSQQVAELLATMMGHMEAFSPAERALIRQYAEFKAGTG  
VEQSLWEDSSGKARAGIRVEATTKLDAGGLYDMIDGSSSTALKDMWHLNSRWVPYLEGDP  
IPWLSLKGEGFTFDKIENDLYLPYDYTKEDATHIWFGTNRNSDGTLDYPTASYDIRED  
IAAETDNGSLMVRLSRFRRDWGIGSGSFSLSGTARPFVGFETFRPSKFFAISGLVGS  
LTNWEESDEKSTAVTYVDTNGDGVADNKDITYFYYSALSQKMLGLQRVELFPFDWLT  
VSATSTLVGAKRFELGYFSPLLFSVMYQNQLADVDNLGVQVDGQILVPRVGKIFYAS  
FYADEMDMTNLSELFTKARNMFALQGGX

>SPBDM4\_v1\_50001|ID:27158364| protein of unknown function [Uncultured spirochete bdmA 4]

MIDGSSSTALKDMWHLNSRWVPYLEGDPWLSLKGEGFTFDKIENDLYLPYDYTKED  
ATHIWFGTNRNSDGTLDYPTASYDIREDIAAETDNGSLMVRLSRFRRDWGIGSGSFSLSG  
TARPFVGFETFRPSKFFAISGLVGS  
LTNWEESDEKSTAVTYVDTNGDGVADNKDITYFYYSALSQKMLGLQRVELFPFDWLT  
VSATSTLVGAKRFELGYFSPLLFSVMYQNQLADVDNLGVQVDGQILVPRVGKIFYAS  
FYADEMDMTNLSELFTKARNMFALQGGAKVPVPWLAFTTLTAQYTKIEPFVYSHYPT  
WYPDYRLRVDTSYTDGENLGYLPPNSDEFLVKFEVTPAPDWRVAMKYRFVRHGD  
NPGNVGDSVIFGDVNKWLEYTPALLYMDKDFLHDGIYDYNHIGNIDVTWRPADPPKLL  
GATIPFELGLGYGLSYTWYEDGTGADRTVSSPEWNNVLSLSMKLFL\*

>SPBDM4\_v1\_50002|ID:27158365| putative Acyltransferase [Uncultured spirochete bdmA 4]

MRYRKGGLTSDTPFSRLIWDILIVLIRLLGWPLSRAMYNIKIEKVDAMAGHRLPSRAIL  
ISNHCMPDPLSHGLAIFPRRTYFTLLEETCEAPVLGSFVRLGGLPLPRSRNRLQDIEE  
AVSHGLSTRGLVHFYPEGECFVGNQNIFFKAGACYFAIKFGVPVPIVTILNRRNGRKS  
NRTQVTVHMLAPIMPPSPGSPHATLVRSIQFSNQVHDLMQIEIERTGGDKSLYRGPMR  
IKGVND\*

>SPBDM4\_v1\_50003|ID:27158366| putative Glycosyltransferase, group 2 family protein [Uncultured spirochete bdmA 4]

MSTTILTVYGVITFAACVFFFITVSNILWLVHTLGTEPKQAGPPVAVLIPARNEALRIR  
PCLDSSLQDYNYSYQIYVIDDNDSTDETWEILRDYMLRFPKIKAFKAEPLEPGWYKPHA  
LQELSSHVQEDYILCTDADTHTPDSIGKAMAVA  
EKYNADLVTGYVHHLMPFSAEASVVP  
SMYILTMFGMPLYLIPFIKSP  
LISHAIGQFMLFRSFFERIGGYEKVKHQATEDVKLARV  
VKQHGGRIAFVDLRTVECRM  
YSTYHKA  
VQGIKNAFDYLGKNFFFLFLGTVA  
VPLVFFV  
PVIVL  
FVNIPWLG  
PALPFLKAS  
AIFTFY  
TWALETID  
RRLPWYV  
PFIYPLIF  
VNTLSAL  
WRG  
FRLVNKEGGVEWKGRKVK\*

>SPBDM4\_v1\_50004|ID:27158367| exported protein of unknown function [Uncultured spirochete bdmA 4]



MMVTERHFTALRSIALASLAILIAANSFVSAQTQPSPPKNPSSVGDVDFQLNAGALAKNQD  
ILPGVPFPAMSAVQAFFELRDSVYSGVAPESVDAQATSLLSIGGGQQLSENDRALLE  
ARIAYLAGRSWNDHKNNKKAAPWFEQAVDAAHTMIALDGETPTALVALAEPLGELSLND  
LGFLVSNGPKVGGYANKALESEPLNIKAWLLKASALAYPPPIWGGNYKKALETYAAILPM  
AETGLPKDVLFDIRVGIATAYANLKLSEHAAWWFKAALAYPQNPYAKSELVKLAP\*  
>SPBDM4\_v1\_50005|ID:27158368| putative Peptidase U34 [Uncultured spirochete bdmA 4]  
MCDTLVLHDSAGKPLIFGKNSDRDPEEPQALVHLPPREPGTTFIREGIGFSDEGFAMLLS  
KPSWMSGGEMGINSKGLAIGNEAVFSRFKPDENGVLGMDILRAALSACATAKEAVDFITS  
FVEKYPPQGGNGAYKGLLVYNNFLAADPEEAYIETAGKRWAWRKAMVADAISNAYCIED  
DYKRLDTQTRKEIAPVNERAACSDPADPGRKGRNSWKKHVEDAKYLFFTKGEQRRNSL  
GGLMRLAASGAGTGDASSVSGARAGMEALFSLRSHEGAPKPGPFLNRMKNLCVHPGLFP  
KSATTASMAVEYLPGGVIVWYTNSSYPCVSLYKPAIKDGRFHSLWKPFAGETKADEWYA  
YWRARKTWVERSHHLGLSNQEAQVQSRNEAQKSIKVARQAFGSILKEKSSPERVLSVYA  
NEVAIVGEWEDRWGD\*  
>SPBDM4\_v1\_50006|ID:27158369| exported protein of unknown function [Uncultured spirochete bdmA 4]  
MDRVRLSKPVVLLFIATLVLAIIVTVVVVQVLAHSQPDVQSQFTLYMEKLEPQSMVVAATT  
QERYEASKEFTAKLLAIFNIKAKIRLSAMADITYVIPASDPSAWSIQWDARARKLVISTP  
APDCLLPVHTDTIEIVTENSNTLNTMFRLLKEEAARMQDELSNDLLVRAKATLEEPVAVR  
AVIEDGVRRFAGTFCESAHLGKPALIEVQLGRLQKTGQNG\*  
>SPBDM4\_v1\_50007|ID:27158370|gg| Gamma-glutamyltranspeptidase [Uncultured spirochete bdmA 4]  
MKRLTLALVLFVAALGAVSAQLPVNLYGRAAMGANGVVAAPKPEASQVGDILKQGGNAV  
DAAVATGFALGVLEPNASGVGGGGFMIKMKDMVEPVVIDFREMAGKATPTMYLGSQDGK  
VIPKSTYEGGLSVGVPGEVKGLLYALEHYGSGKLTRADIIQPAIQWALQGIPVTVNLESI  
TKDNFGKLQYENGAQIYLKDGLPYEVGDVIYNPDLAKTLAKIVKEGEDAVYKGEIAQAI  
VDEVQKRGGIITLDDLANYQVKIRKAVEGDYRGYKVSVPASSGGTHLVEILNILENFD  
VKKIGFETPQAAHLWSEILKLTADRISKYMGDITDFVKVPLAGLTSKDYAKEQAARIDLNA  
SMNPPQAGDPYKYESGSTTHFSVMDKEGNMVAVTKTINYFFGSGVVIPGWGFIMNDEMDD  
FVATPGSVNSVEPGKRPLSSMSPTLVLDPQGRSFMITGSPGATRIFPTVAQVISNVIDFG  
FPIQEAAILAPRVYQAASGDLQLEGRYPVSALEGVKKLGHNVNIRGDWDAYFGGVHAIIVYD  
YDEGLLYGGADPRRDGQAAAF\*  
>SPBDM4\_v1\_50008|ID:27158371| conserved exported protein of unknown function [Uncultured spirochete bdmA 4]  
MRRSGRIVIIIVAAVMAACLPLSLAAAYNLKAPIAAQPALLTSVGQSADVEMAKAIMGRAKL  
SFTMDSLVAQGLASANAKTLLIIVVGGSSKGLGAAGISADAELERTKALLTEAKKRGMKI  
IGLHIGGEARRGELSDRFINAAPYCDYFIVVEEGNNDGLFTKLCGTKIPLDTVQKISQV  
GEPLAAAF\*  
>SPBDM4\_v1\_50009|ID:27158372| conserved membrane protein of unknown function [Uncultured spirochete bdmA 4]  
VSQEFWLFILMVGVFVFAAGCFALKWPVSVSMLLAAVAGALAGGVQNPVIRHLVEGTFGYVDT  
ILTIATAMMFMGTFRDSGALEALTAAVIKKFNKLPILMILLTFVIMVPGMITGSSTASV  
LTAGAVVAPIFASMGMTAAESGALISIAAILGMIAPPVNIPIAMIIGGGIDMPYVGFVPL  
LLLTFPLAIVFALWFGWRKVRKVDRSKVLASLDFSTLDQYGGRLRFSPLILIFVLMILDK  
AVPRVFGLGMPLIFILGTMLTWVTGKRFNILQSAKKSIEDVLPVLGILVGVGMFIQIMTA  
TGVRGFIVVNALSVPALLYVMIAISIPFGAISAFGSSSVLGVPFMLALLSQDQIIAAA  
SLSLIAAIGDFMPPTALAAIFAQVVGLEKYGAVLKKLVVPALIIIVYAILFIVFSKQIR  
AVL\*  
>SPBDM4\_v1\_50010|ID:27158373| conserved protein of unknown function [Uncultured spirochete bdmA 4]  
MFYIYLAILAVVLALTVWVLFDTKKFSLQVTAAMVIVPLLLRLLMIK\*  
>SPBDM4\_v1\_50011|ID:27158374| conserved exported protein of unknown function [Uncultured spirochete bdmA 4]  
MRKHTITAIICLAGALVASAVAGASFLAMRKPDPVIVNGPGVSEKKMLSDWFPGLKGTGPD  
TEVYILKGADDGASMLILGGTHPNEPAGHLAAIVYIENVVPKTGTLVYVIPRANASGFTAN  
DPQEGAPQRFTIQTTPNGPRVFSYGSRATNPVHQWPDPNVYIHASSGQTLGSETRNLNRG  
YPRPDGTLTEKVCYQIVQLIKQNVITITVDLHEASPEYPVINAIVAHPKAMTLASDTVL  
GLEMQDIKISLEPSPVNLRLGLTHRELGDFTDPLMETANASQGRLRGRTDEALVLTGK  
DKWYVRAQKLGRLYVPYDEKGHPIEERVGRHVTAIGEILTSWNLEHPPEPLEFENIPGYE

DILAKGVGAYLLPAPAK\*

>SPBDM4\_v1\_50012|ID:27158375| NADP-dependent oxidoreductase domain protein [Uncultured spirochete bdmA 4]  
MLYRRLGSAGIKVSVLSLGSWVTYGSQVDVDAAMEMLKYAYDHGINFFDNAEAYAGGKSE  
TIMGQAFRKLGFRRGSYLVSTKLFWGINEGPNEKNTLNRKYLLEGIEGSLERLGMKYVDL  
LFCHRDPDPTPIEETVWAMHDIVSSGKALYWGTSSEWSAEQIREAWEIADKRNLRKPQMEQ  
PQYSMLVRTKVEKEFARLYQGTGLGLTTFSPLASGLLSGKYKDGIPKDSRFALPGLDWLK  
DRWYHDEVIA TIEKLRPIAESLGCTMSQLALAWVAHNPNVSTVITGASRLSQLEENLGAL  
EVLPLKTPAVLKKIDDALEPLLTMSN\*

>SPBDM4\_v1\_50013|ID:27158376| putative Nuclease SbcCD, D subunit [Uncultured spirochete bdmA 4]  
MPTTSKIFKLVHISDLHLGKSLRSQDLAEDQAYVLGQIVRQAEKLPDLVIISGDVDFDRS  
IPSESAQTMFGRFMADLRRALPGQARSALRGQARILVIPGNHDSPRRIAAELFEAVGI  
YLVSEVRLAPALVLEKGGKRAAVWALPFVTHGAYHEFRRNLPEGTPVDALGDGSMARMA  
SIANIRPHFGEYDLNILEAHCYVRGAALTESDTAFIGGTEAVPASLFDADFVYVALGHLH  
RMQALSPKMWYSGAPMAMSGDGGSEKGFYTELGAKGPAPKIVPVILEPLRAFRRVRGTF  
EQLTAESSTLDSYVEVILTDADPVYNFANELAARFPNLTSTRQEA FEKMAAGTGFDGLP  
VDEARLDTENRQALGLSHEDTRHAAALRDFASFARCILEPPPEEMMQAFESLLAEAEQE  
LA\*

>SPBDM4\_v1\_50014|ID:27158377| putative Nuclease SbcCD, C subunit [Uncultured spirochete bdmA 4]  
MRPLTLAFEHFPGPYRQRQDIDFSTLDEFFLIYGKTGSGKTTIFDAIAYALYGEAVGGRSN  
LERELASRFSPAGSKPWVEFEFFASSARWKVYRSLPYRRQGRKGKSEATSEVALYRMNE  
AGAYELLADRPTTANQTLGLLRLSADEFKIVLLPQGEFQQFLEMKTTDRVQILEKLF  
VRIYDEVTEAARRKVMQLDSSLKSKHEELERISNELGTEPDARMSASGKLILEFDANIET  
AARDASRLETEIAQKNERLAFWQSLLAAWKAFSEIEQSKPAFDEREKKLEAVKTLAALGS  
LARQAGSQREEVATALEKALRTGTELARLES DRGEIEATAKTLPHLREEHDELQRRALY  
QKALEAWQQKAELESQRLEALEKLTSTEQCARQE QGILSLKKGIAELDAVVTGEPETQE  
KLQKNLMTGEALKRIRALAEQKEKTEAQRSEILRKIQTTE DLLLSSDRDLADAENRARM  
DEIRHAQAGLLAASLISGEPVCGSREHPKPTSLPEHAPDEEA VRKAREAVETIKSSR  
AALLQTKEDQEGRLQEFVQELEIARQKISDEWRAHAGAFPDGEAASPLDEVSRGAIESAV  
TDLQSQRQNLEEKLNRYRDARESLRQMRRTLEKAERDYAQIQKEKAAL EITRTELDAHLS  
SLIEQVGNEDPQPRLQEVRELAALQREIFRMETRARDWLEAWSTANAETMTHLETIASK  
GKALATGFEQFFTEAEKADVRGLFQTLQSPAGTAQASQPQRRPQSQHQNASNGSIHTALL  
DLARNLPHTKFGPSSNRLTGLAKSLETIFSARATSEAETLDLIEDILSSVWPQDRIREE  
EKALATFRESYAKARTSYEVLASRAQPLSPLELEQEERALIAVVTALAERKKALEASISE  
LRSERARLSAELEQLRHLLSRAESLRSEYSAAASEFGKQEKLARLLSGSLNPQRKMPFKN  
YVLGLQFREIAARASERLYRMSSGRYIVEADILSGSGNQKIGLEL FVIDAWNGARRPVGT  
LSGGEKFMLSISLALGLADSIQERAGAQRIESLFIDEGFGSLDEESLSLAISVLDELRGD  
KTIAIISHVDEL YSRIPSRIVVKKGVSGSHLEFERD\*

>SPBDM4\_v1\_50015|ID:27158378| Alcohol dehydrogenase [Uncultured spirochete bdmA 4]  
MYEFYAPT KIIIFGEGCLSETIPQIKKMGATCALLVTGRSSTASSAGFKSLCKELDAGGLR  
WAHFAEVSADPETTIVDRGAEIFRAKGCDAIIFGGGSPIDCAKGIAASVAEGRSIRDFV  
GTGLAFSAPVSPLVAIPTTAGTGTEVTNAAVFTVVDENGRSKKGTSSQFYFPRLAVVDP  
LLHASMPPSLTAATGMDALTHAVEAYVSRFHTPLSDMYCLEAIRRIGRSLRTACRGSGID  
AVAGARSDMAMAATLAGVALSQAGLGMVHGFAHPIGAMTGLAHGLANAILLPFVMNALIP  
DAGERLSSIGQALTGKSGISAKESVRAIARLGRDIGIPENLEAAGVPETYFENILTDALS  
YRRRKASPHAFDTAELRALLERMYGGNVEA\*

>SPBDM4\_v1\_50016|ID:27158379| ABC-type transporter, periplasmic subunit [Uncultured spirochete bdmA 4]  
MKRSLFVLLALLAFAGSAFAQDFIIANGAEPSTLDPALMQDTTSNQFYLAMFEGLVQYDP  
RTSKGIPAMAESWTTSPDGMTVTFKLRDAKWSGDGTPVTAQDFVYGWLRTLAPETASNYAY  
MLGMVVKGADDYNAGKGAEDVGKKAIDSKTLQVQLVGPAPYFVDMTAHSAFAPAPKWTI  
EKYGDQWTKPGNIVVNGPYILKEWKPDYVLEKNNKYWDAKNVKLRTIKYLASDSMSTN  
YKMFKAGAVDWMNGIDVSMIDEIKLRKDYQASAQFATYYINLNNQREPFNDVRVRAFAA  
AIDKKTLDKVLKGGQIPTDEFSPMAGYTPQPGQGYDPAVAKKLLADAGYPDGKGFPSL  
TYIYNTNAGHKLIAEYVQQQLKTNLNVDIVLQNMEFKTLIEMRNKHDFTIARDGWVGDYL  
DPNTMLELFISSDGNNSGDHRNPAFDKLMEDARMAKGDARMKMLEQA EKILLQNDQAIIP

LYHYANQDMIDTSRWGGWFANPIGYHPPKFIYKK\*

>SPBDM4\_v1\_50017|ID:27158380|oppB| oligopeptide transporter subunit ; membrane component of ABC superfamily [Uncultured spirochete bdmA 4]  
MSRYIIRFLSLIPTIFVIITLSFFLIRFAPGGPFSSEKNVPEQVIQNLMMKKYHMDEPLF  
KQYLSYMGDILHGDLDGSPFRYRDSTVNELIGQSLPNSMLLGTIALVLATVAGIAVGIISA  
LKQNHWQDYTFMSIAVVGISVPLFVVGPIQLLVFAMRLHVLPLSGWITGREGIKALIMPA  
ITLSFPYFAYIARLSRASLLEILRSYVVRTARAKGLAERTVITRHVLKGGLLPVVSYLGP  
AFSGIITGSIVIEQVFAIPGVGRIFVQSALNRDYLIMGEVIVVYSLILVLMNFVVDIVYG  
FLDPRIAYN\*

>SPBDM4\_v1\_50018|ID:27158381|oppC| oligopeptide transporter subunit ; membrane component of ABC superfamily [Uncultured spirochete bdmA 4]  
MSRKIGQAVNEFNQMKPVSLWADAWKRLRRNKMALISLWVVGFYALVALTAPLFPFLDY  
RTQVIEHANLRPSLQAGKLVQKLEAHRAVLQERINEGMDNLKPDLERTEADIQYAKDH  
LNDPVNKKVYIFGTDNLGRDMLAKTIYGGGRISMMVGLIGTLTAVFVGIIVGAVSGYVGGW  
LDNLLMRFVDIMYSLPYMLIVILMAMFRKEGQSSIFILFIGIALVSWLTIARVVRGQII  
SLKNSEFVEAARSMGASTGRVIFRHLNPTLGVIIIVFTSLSLPSFIMNESFLSFLGMGVS  
APLSSWGSLSVSEGANTMELYPWQLLAPAIEMTVLFFMNFLGDGLRDALDPQSKNRT\*

>SPBDM4\_v1\_50019|ID:27158382|oppD| oligopeptide transporter subunit ; ATP-binding component of ABC superfamily [Uncultured spirochete bdmA 4]  
MSDEVILQVKDLKTYFTVDEGVVKAVDGVVSFELHRGETLGIVGESGSGKSVTNLSIINLI  
PMPGKIAGGQVLFHGKEMLTMSPNIREIRGNKISMIFQDPMTSLNPFLRISTQMVETI  
VLHQGLSKEESKTKAIEMLKLAGIPAPEKRIDQYPHQFSGGMRQRVMIAMGLSCNPEILI  
ADEPTSALDVTIQAQILELMQELTRRLGTAVILITHSLGVVAGMCNTICVMYAGRIVERG  
RTEEIFESPRHPYTMGLIRSVPRLDQETRGRLYSIPGQPPNVIDLPDCCPFYPRCDKVM  
ICKKKYPPTVPFEKEQSAACWLYAKEAQN\*

>SPBDM4\_v1\_50020|ID:27158383|oppF| oligopeptide transporter subunit ; ATP-binding component of ABC superfamily [Uncultured spirochete bdmA 4]  
MPDHEILLDVRGLKMHFPIRTGFFSKAKNFIYAVDGVDFQVRKGETLGLVGESGCGKSTT  
ARAIQLYKPTAGEVYLNLDLTKANGQELLAARKNMQMVFQDPYASLNPRMTAGDIIAE  
PIRIFKKNGLMEASKDEIDDRVEQLMEKVGLSRFFKNRYPHEFSGGQRQRIGIARALAN  
PELILCDEPVSALDVSISQILNFRDLQDEFGLTYLFAHDLSVIKYISTRVAVMYLGL  
IVEIADAGDLYKNPLHPYTEALLSAAPIPKIEAKRHRILTGDPSPDKQRPGCNFYD  
RCPKHMDICKKVRPALKETEPGHQVSCFLYHKPE\*

>SPBDM4\_v1\_50021|ID:27158384| protein of unknown function [Uncultured spirochete bdmA 4]  
MSAEAATPHSRLCFVRSRGSTEPLRLYSKKYKRVSDFPVGGSTTAIPNDPTNERRALILLQA  
KGLITLKPDAAGFEASTPCRIRSSPKAESRPTRK\*

>SPBDM4\_v1\_50022|ID:27158385| protein of unknown function [Uncultured spirochete bdmA 4]  
LQRPRRCKGKSQRKLVLLGLSLKAVESYEQGWRSVSSNVERMLYFLLFKLNQKAFEAEF  
PCWEATSCPEERRGHCVA YVAQEGYFCWFFTGGLCASAKALGEGERHCYGCTVFIRRRSL  
AEASAAGGDASGERDDASR\*

>SPBDM4\_v1\_50023|ID:27158386| protein of unknown function [Uncultured spirochete bdmA 4]  
VANDYNKIAFGHYLDDAVETLLMNMLYKSEISGMLSVLRYKKYPLSIIRPLTLCEERQTI  
AYAEEKGFRSGRSAPVLLGAIPSGARSEQRLRPSGA\*

>SPBDM4\_v1\_50024|ID:27158387| NAD/NADP octopine/nopaline dehydrogenase [Uncultured spirochete bdmA 4]  
MHRTWAIIGGGNGGQAMAGHLALLGERVRLFDVFSDTVNAISRQGGIKVTGAVNGFGPLE  
FATDMGQAMEGADVVMIVLPSIYHEEMGRNCIEHLRDGQIVFLHPEASCGALAFKLLV  
EAGNTADVTIGAANTLLYSTRIITPGTVDFGVKHSLYMAALPASRGTRLEEAIGSVFPN  
FTLCPNVLYTSISNNNAMMHPAPTLNVARIEAGQDYFYYTEGITPSIGAFVEQMDDERI  
ALGEAYGFIMKTLRKS YFDMYNSGDMSESDLSALCKKVVA YREIKAQKTLRTRYVLEDV  
PYSLVALQSLAKIAGVSTPCIDAVVQLAHGMLHGELDEGRTCEALGIAGMTKADLLRYVS  
\*

>SPBDM4\_v1\_50025|ID:27158388| conserved protein of unknown function [Uncultured spirochete bdmA 4]  
MTNGKPLLSMKGIQKDFLENRVLEDINLDAQGEILGLVGENGAGKTTLMNILFGMPVIQ  
QTGGYKGTITLDGEEVHFSNPNDALMAGIGMVHQEFFLIPDFSATENIFLNREVTRYSFL

VEIFGERLRTLDRAMNERVVQLIKELGVDINPDTLVSEMPVSYKQFTEIAREIDRAKIK  
ILVVDEPTAVLTETEAEALLTVLRRRLAAKGVGIIFISHRLHEILDICDRIVVLRDGLKIR  
DVPSRQSDVKSIA SWMVGHVDFVFPKQGCGEKESFLSIEHLKVLMPGEAVKDVCLQV  
RKGEILGIGLAGQGKLGIANVMGLFHAEGSVTLGGKSLKLN SPLDAFRAGMAFISEDR  
RGIGLLL TQSIGLNI AFPLMQVKGGLLKKIAGLFTWEDEKKIREITTKYIERLDIKCTGP  
DQVVMELSGGNQKVCVAKVLALSPQILFASEPTRGIDIGAKHLVLSVLKEINEQEGTTI  
IMTSSSELGELRSICDRIAIVSEGKVAGVLP AEAPVEDFGLMLLGE\*

>SPBDM4\_v1\_50026|ID:27158389| Monosaccharide ABC transporter membrane protein, CUT2 family [Uncultured spirochete bdmA 4]

VKNEDRKP KGRVGEFIANFGWPRIIAIFLLLLFVIAPFIGIDIGTSLSDMLVRVGMNGI  
LVLAMVPMIQSGCGLNFG LPLGIIAGLVGAVTSMEQNWQGLFGFGMALLLAIP LAVVLGI  
IYGYFINMAKGD EMMIGTYVGF SIVAFMSMMWLR LYPYKNPLL VWGFSGTGLRTTISLNGF  
WMKVLDNFLAIRIGAHFFPTGSFIFALCCVLVWAF FKTGTGIAMSAVGSNPQFARA HG  
VSVDRMRIISVVISTVLGAVGMVVYEQSYGFIQLYMGPLYMAFPVA AAILLGGATINSAT  
ISNVVIGTFLFQGILTMTPSVINGMLKTDMAEVIRILVSNGMILYALTRKGKGM PK\*

>SPBDM4\_v1\_50027|ID:27158390| Permease component of ribose/xylose/arabinose/galactoside ABC-type transporter [Uncultured spirochete bdmA 4]

MKQKYSFKGALISNLVPIVFLAFAFAVPMSGLSIQYLLEEMITRLARDSLLVLSLIIPV  
LAGMGLNFGMV LGAMAGQIGLVLVVDW GIGGMPALLVAALVGTPI SIGLYFCGYILNLA  
KGREMVT SYIIGFFMNGAYQFLLLYCMGSIIPISNPELLLSRGY GIRNSMDLPNIRQVLD  
RLVSVNIFGMNIPIVTF AVIAAFCVFIVWFKGTKIGQDMRAVGRNRAVANGAGIPVEKTR  
IMAIISTLIACYGQIVSLQNLGTINTYNSHEQVGFISIAALLVGGATAENASIVNVFLG  
VFLFHLMFV VSPMAGKNLLGDAQLGEYFRV FVSYGIIAVSLLLHAWKKRHEMLERLLEN  
SVKE\*

>SPBDM4\_v1\_50028|ID:27158391| exported protein of unknown function [Uncultured spirochete bdmA 4]

VNVKLRNLLRVALCLIAVAGGFLLSLVGMYSIILDNSEFSSAGAVLPPLEGLRVLSEA  
EPVEMSPDDRILVSTKGPSTTLVFEITSPETQ QSREISYTLHMGFKKQFFLSVPAIVGGE  
KNPFLVE\*

>SPBDM4\_v1\_50029|ID:27158392| Amidohydrolase [Uncultured spirochete bdmA 4]

MMELYGKLGKTD AWIEGHLAEYGR LSDQIATHPELSNQEYETS AALCRALEAIGFSVEH  
PYAGYATGFNARYEHIVGSSRPVVVGLLAQYDALPEVGHGCGHNMCGPMSNLAAGALKDV  
LEAGNISGVVRVIGTPAEETTGEKVPMAAAGLFD DCSFVMMAHPTTASSFVWFNSLAADP  
YEFTFMGKA AHAAAAPWDGVNALNGLQLFFH AVDMLRQHVRPEVRLHGIVVEGGSAPNIV  
PSRASAHFLLRAPWRNYLNVVKEQVFN CARGAAIATGTTVEWKMFGNAMDNMLRNTIAEN  
TMTHILQDELAEPINSNPTLTGSTDMGAISWRVPTIELQIKVSDKEIPPHTVEFAQAARG  
PGALSPMAKAAKGLARMGLRVLLDEPFRR TVHEELDQRKKDLL\*

>SPBDM4\_v1\_50030|ID:27158393| conserved exported protein of unknown function [Uncultured spirochete bdmA 4]

MKKGLVLALV VGLWLGFSA GAFAAEFHIGMVTNTVSQSE DGFRAQAF LKKYGDVANG  
GMVKHITMPDNFTTEMETTISQIVSLSDDPKMKVIVVDEA VIGVTEAFRRVRERRP DIVL  
LAGEPQEDPNMITAVADMCMVMDHISRGYTIY GAKMIGADTFVHISFPRHLGIELLSRR  
MNIMKEACKDLGLKFVQETAPDPTSDVGVAGAQQYVLEKTPAWIEKYGKNACFFSTNQVH  
LEPLFIQIAKYGGYFLEGDSPSPLKGYPGA FHLDL SNEKGDWP AIMAKIEKAVIAAGAGG  
RLGTWAYSATYSMTLGLGEFGKAIAEGKMKASDTKALVKAMETATPGVTWKSTYYRDKNT  
GVQKKNYVMLMEDTYVFGKGYLHLTDLEVPEKYYKIK\*

>SPBDM4\_v1\_50031|ID:27158394| Peptidase M24 [Uncultured spirochete bdmA 4]

MFHSVRLTKLIDVLRERGLDAIFLAPSSDLEYLTGMRLHPDSR FKGVMVSKEGKAFLSLCP  
SLYKAEMSKSLPEAQLCEWKDGEGFRDAFLKGCTALGLMRGK VAFNGGVRAADMLDATAD  
TSIRCVNGATLLSSLRCKDAEERELRRASKKNDSMMEKLSHFIRPGKTEREIAKFVMG  
VHEEQGGLPRYPVIGSGPNGAKPHYSGEENRTIQEH DVVVDSGAWYESYNCDMTRTFIM  
GSPSSEVRRVYDIVFRAQNAGQAAAGQGAIPEDIDRAARSVIEQEGYGEAFFHRLGHGTG  
RDPHEEPFIVQGNRVPLQEGNCF SIEPGIYLAGRFGVRIENLVLISEKGT EILNSFTKSM  
IIIE\*

>SPBDM4\_v1\_50032|ID:27158395| conserved protein of unknown function [Uncultured spirochete bdmA 4]

MLKRANRSTLHGDIMQQMIKAIQEKQWAPGSKLPSELELAETFGVSR TSIREVLKALAH S

GVLEAHPGKGTFLSPSAEEILSGTKLTAAMFSEYSYTELIEVRRLLLEGQAVYWAAERASP  
 EDIARLEEILKNEGETSFDIHDKFHTAIVEMSGNRLLIKLMASLRDEIVAQREFHNVVL  
 PDTDRQQWQIFEAIKSRSPKKAFFDAMMKHINVFWEKLA\*  
 >SPBDM4\_v1\_50033|ID:27158396| putative ornithine cyclodeaminase, mu-crystallin [Uncultured spirochete bdmA 4]  
 MIEDTMLLNQKDVQSLITMEDVIDCVDRTFQGMNGTUVNPTKVNLDLGETAAYPSSYSGF  
 MNAMPAYIGWSDSAGIKWAGGFLGERKKLGLPYITSLILLIDPRVGNFRAVMDGAFITNY  
 RTGAQTAVALKYL YGKGGKIRLGLYGAGVQGHQTMAISALFEITEVKVFDMNREAAEKY  
 ARDMESC VKGPIQIVPDARSAAVDQVAVCVTQAKSEFFRNEWFKPGMLLFPMGSYQECD  
 DACIETADRIIVDHIGQALHRGALAKLGTSGRISEKNIYATIGEVAAGKKAGHFSGGERV  
 ICVPIGTGAMDISVATLAWQRAKEKGLGGRFKFV\*  
 >SPBDM4\_v1\_50034|ID:27158397| putative ornithine cyclodeaminase, mu-crystallin [Uncultured spirochete bdmA 4]  
 MVADTMLLCQDDIRALITMKDVIECVDRTFQGMGDGTVINPTKVNLDL GARAPYPPYEGS  
 LNAMPAYLWCD SAGMKWAGGFLGERKRQGLPYLTALILLIDPRVGNFRAVMEGAFITNY  
 RTGAQTAVALKYL YGRGKKIRLGLYGAGVQGYTQTMAIAELFEITKVQVFDIRRSAAEQY  
 AEDMKNIVRGPIVTSRPEEAAVDVDVVVCVTHADDGFFRNAWFKPGTFLFPMGSYQECD  
 DQCILTADKIVVDHVGTIHRGALAKLGASGRITEKDIYATVGEIAAGKKPGLFHGDERI  
 VCISIGTGAMDVGVATLVWQRAKEQKLGSMYRFV\*  
 >SPBDM4\_v1\_50035|ID:27158398| L-serine dehydratase, iron-sulfur-dependent, alpha subunit [Uncultured spirochete  
 bdmA 4]  
 MDDTNRLVSLFDTLGPIMTG PSSSHTAGVLRIGRMGRMLFGGTPEQIDLYFYGHALAQTY  
 KGHLGDSAIVAGLLGHSEDPALKYSLQEAHQGISVACHTELASKRDPNTVDMRLRRGD  
 KEVRVVGITLGGGEIEITELEQFPIHLKGDEVGVLLVNSYFDDAQLHKL YEGEHRRISV  
 SKKGD ETLYTCLLDTPLLPEEIEHLRAWNGVVAVYALEPILDYRLRDAVPLFSTVEGMLA  
 MGEKEGASIPQLAIMYERRRSGLSESEIRARIGKIWQKMKE SLAAGAGGNNTMLAGFIG  
 NNGWKMLRAVDEGITLSGPTLGKAIGRAI AVMETNACAKCVVAAPTAGSCGVLPGLVTTA  
 AENLKADETTVHDALLS AAMMGTLVSMRASLSGTKGGCQAEIGVASAMAASALVQLAGGS  
 ARQVTHAMALAIKNILGLICDPVAGPVEIPCIKRNSIGVANAFATADMSLAGIESAIPD  
 EVIDALVNTQKLLPSALKGTMIGGLGSTPTAQRLLKKEWDARVRVARE\*  
 >SPBDM4\_v1\_50036|ID:27158399| protein of unknown function [Uncultured spirochete bdmA 4]  
 MEAPSDGAKGNHYVVCKKITDLIGNTPLVQVLAPEAAQGDNRGGNLARYRWESGHRRGR  
 GYRRHDPRHRRGIRARRVASRPSSAEKTIVAILPDTGERYLSTWPFEEGGEANL\*  
 >SPBDM4\_v1\_50037|ID:27158400| protein of unknown function [Uncultured spirochete bdmA 4]  
 VDIVVAGVGTGDTIPGIGAGFVPAG\*  
 >SPBDM4\_v1\_50038|ID:27158401| putative Methionine synthase [Uncultured spirochete bdmA 4]  
 VSPRELSGIAISGATDSL AAGQVSNPAVQGARPD EAKLRSLIGGRLILADGSTGTALEAL  
 ASDAASGGRIPLPLERPDVETLHEAYFRAGCDLVETATFSASARDLARFASKDEGGAE  
 GLSEAVNKAAAAARRAADKAS AIDKRIRLVAGSIGPGDAPPSLGTSTY GELFLSYLPQA  
 KGLTEGGADLAIVETCQDPLQIKAVIAALRSQQGGRGLPFIVSATVDARGRMLAGTDIAA  
 FVAIVSPFRPLALGLNCSGGPDELEEPLKELASLSPFPVCFMPNAGLPCTEDGCVSYFPF  
 PELFAEKVESLARFRGVAIVGGCCGSGPGHMAALSARLSDRPNVPKRPPLRALASLSEA  
 KFIGPGLFRIGERANSAGSAAFAALLDAEDFEGMAEKALKQESSGAEALDLHVS RPGRDE  
 AKDLERLVALLAPRARAALCLDSGDPEVLARVLPSVGGRP IINSASLEDPAKARRVFLA  
 AEFGAAVICLAMDGAGPARILEDKIRVCRRLYEMATGEFGLPPQSLLFDPLTFTVAAGGD  
 ASTTINAISAIKKACPGSLTVLGIGNVSYGLPKSARPAVTALFLDAAVRAGLDAAIMDTA  
 GTPAPESIAPELREAAEQALGIAGR DWSIGCRRGGSHGGRS RPAGDDSSRRDAVDPLGPLL  
 AWAEARSGKNTEAGAKSPGAALLAGTKTPDSEAADPTAALSAAVLRGDTAGA EKAGQKLG  
 ETGGPEKLA AAVTAAMAESGRLWNEG TISLPLVLRSAEAARRALAPLASDAAKTAKGSIV  
 MATVKGDLHDIGKNIVSAILACSGWRVVDLGT DVSASAIVEASHSQGALAVGLSGLLTRS  
 LVEMKTVCEALETAGSECLVLCGGA AVDPAFVTREIEPKHPGLVRACADAFGAAAALNDF  
 LENGARLRTPADRTSADRAHSFGPVGGRKSTGTPILPKASPAFEPPLGSSPPLAIPFS  
 ELLPLVDQRALFASRWNYRRGDWEEAQRHLGILLPEAERLSTPAGVYGYFRCRRAGERTV  
 SIEVPGGRSFDLPPFVEAGGHHRTLAAHFSSAGDAIAFFAVTTGPEIARAALALQARGKL  
 ESYWRLHGLGSSLA EAAAQWMHERIARELSACGAGGRGR RYSFGFPACPGTKYQNTLLEL  
 LGAHRIGIRATTGHQLVPEHSVTA FIIARPDTVYFEA\*

>SPBDM4\_v1\_50039|ID:27158402| putative Methylenetetrahydrofolate reductase [Uncultured spirochete bdmA 4]  
MPATSYCGVTMHNDKPSVNTSRARVLDTLASGLASRPVSGRAPRRRCISIEMVPPPRGGDL  
DSIMAAMETIAPHRPSFVSVTDHPGGKAWVDSGEGPKRVALRTKPGTLGTAVALRDAFDI  
TAVPHIVGGMADRLDVEDLLIDLHYANFRDIFVVMGDDRYAPAALPPGGRAGRMGNGPDG  
YNHARDIVEHVRLNRGEYTPPSEGKPTDFVVGVAAYPQKHFAAANPETDFEHLVEKIRA  
GASVITQMVFEAGPYADLVRRLRDAGVGVAPVLPGIKILKASSLDMIPRTFFVDIPLL  
VAALREARSPAEERAAGIAWTVKLCQDLLDAGAPGLHFFTMGRGVGTRWILDALFGTPGG  
KV\*

>SPBDM4\_v1\_50040|ID:27158403|metA| homoserine transsuccinylase [Uncultured spirochete bdmA 4]  
MPVRIPDDLPAAKQLEENIFVMTKERAFHQDIRELHIAVLNLMPTKMTETQLLRLLGN  
TPLQTDIRFIRMTSHDSVNTPEHLDAFYEPLDEILDEHFDGLVITGAPVETLPFEEDY  
WSELVRLMDWSTTHVWSTLHICWGAQAGLYHHYGVGKRPLPRKMFGLFRHKALDLKEPLL  
RGFDEEFLAPHSRHTVCADAIAAVPHLKLLAVSEEAGVYLVASQDGRRVFTGHPEYDR  
LTLKAEYDRDLAKGLPIAPPVNYFPGDDPAREPLMTWRAHAHLLYANWLNVCVYQETPYD  
LDSIGGPN\*

>SPBDM4\_v1\_50041|ID:27158404| Aspartate/tyrosine/aromatic aminotransferase [Uncultured spirochete bdmA 4]  
MPDISAKSRSGESVIRRMTRVALRHGAINLSQGFPDFDPPRALLDAAARTAVGGPHQYA  
VTWGAQNREALAAKQRRFMGLPIDPDREITVTCGATEAMMAAVMTAVDPGDKVIVFSPF  
YENYMADAVLSGAQPLCVPLRRDSSADDFTFDPELEAAFEAGAKALILCKPANPTGKV  
FSRTELETIAALAERYDAFVITDEVYEHIVYEPYKHTYFASLPGMFERTISCSLSKTY  
ITGWRLGYVIAPATVTEGVRKVHDFLTVGAAAPLQEAATVLTALGFDDEYYKELGTLYRAKR  
ELFLSYLDRAGLSYVRPQGAYYVLVDIREFGAKDDTAFCWMAEKAGLAAVPGSSFFKDF  
EGRYIRFHFAKRGETLVAAGERLLALKSRWEESGQRRVARRG\*

>SPBDM4\_v1\_50042|ID:27158405| O-acetylhomoserine/O-acetylserine sulfhydrylase [Uncultured spirochete bdmA 4]  
MAEKRTPSIETIAVQAGHSPDPATLSRGVPVYRTSSFTFKSAEHAANLFAKESGNIYSR  
IGNPTNEILEARVSLLEGGAASVAVASGTA AVFNTVITIAKAGDEIVSASNLYGGTYTMF  
DAILPDFGITTKFVGDLDPASFDAAVTDRTRLIYIETIGNPVLDLADIDAISAVARKHHL  
PLVVDGTFTTPYLLRTIEHGADIVINSLTKWLGGHGTAIGGIATDAGTFDWSDPKFVLFN  
RPDPTYHGLRWAADLPPELRKIAFAMRTRTVPLRNLGACLSPDNAWIFLQGIESLHVRMP  
RHVENALAVAKYLKRHPKVAWVRYPGLEGDPSYELSKRLLPKGAGGMVVFVGGKPAGE  
KFIESLRLFSLANVGDAKSLALHPASTSHSQLTEEQQKASGLTPDLVRLSIGIENIDDI  
IADLELGFAAV\*

>SPBDM4\_v1\_50043|ID:27158406| protein of unknown function [Uncultured spirochete bdmA 4]  
MEIPLRLVTRKDGSIFYGIPISFRIMMGMLALIGGAIALEEFHTGPLGWIAVILLVLGF  
VYKEDWLFDAASGKTISGLVGFYPVLKKTNLAFEEVAYIQLAAFSKGTVPGSPEEKADRE  
AFNEMRGDVSRSQMKGGFDIFQRKLYIAMLIITKNEEHYLLDMVPARRASRLSIAGRAL  
AALIGCSFLENLPE\*

>SPBDM4\_v1\_50044|ID:27158407| protein of unknown function [Uncultured spirochete bdmA 4]  
MRACISEMSQALEGADAALIEQFFYQLFTA AEADMAKRWALVKELAKGTPQRKIAAQLG  
LSLCKITRGSRELKKGSSFRLLDKLPPTSEHESSGSSPKPGIAKA\*

>SPBDM4\_v1\_50045|ID:27158408|gap| Glyceraldehyde-3-phosphate dehydrogenase [Uncultured spirochete bdmA 4]  
MSKVKVG VAGYGVIGQRLADGVALQGMELVGVADVAPTLSVRALREKGMPLYKFFLAAPD  
KREELEKAGIPISGSLEDLVQRVDVMLDATSAGVGAKNRALLEYKYGKKGIFQGGEKNSVA  
DVFFHGYANYEKGLGAQFLKLTSCNTTGLIRAVDCLDRKVGVEKVAITIIRRVADPGDYH  
RGLTNALQIDKAPSHQALDLMTIMPQVEATGILVHTPVTHGHIITVVATPKKSVSPENVI  
EFFREHPRIRVVS LAEGFLGNASLFRYARDLGNPRGDMYEIAAWEDSVVMSGKDIFAIN  
VPQEA VVIPENMDAVRACMRMEEDRIEATDTTNRYLIGIGKWRNLG\*

>SPBDM4\_v1\_50046|ID:27158409|fsaB| fructose-6-phosphate aldolase 2 [Uncultured spirochete bdmA 4]  
MKFFLDTANLKEIREIAEIGLIEGVTNPTILSKEGSGWEKGIKEILTIVKGPVFAEVFS  
TQAPDMIREAETISSWNDRLVIKLPIMPEGVKAINALS KKGITTCATLIYSPGQAVVAAL  
AGASYVAPFVARSF EIAMDGIQLIEDISNIFSMQEVETEILAASIRTPHDAVRALLAGAD  
ILTLPYGV LKQLMGHPLTDVTLKFKMDDWSAVNR\*

>SPBDM4\_v1\_50047|ID:27158410| Glycyl-radical enzyme activating protein family [Uncultured spirochete bdmA 4]  
MSSGIVFDIQRFSIHGDPGIRTI VFLKGCPLRCLWCANPESQRLEPELFYIPGRCIRCA

CFEACPAQAVRRDDYTEGRIDRGACILCGACVEVCPTGALSMMKGGKRMGVDEVYGEVLKDR  
QFYASSGGGVTFSSGGEPFLQVDFLQALLERMKAGGIDTVVETAGDVPWCAIERCLPFLDH  
ILFDLKAFDPERHRRIVGTGNKRILENLEKLSSADVDMAVRIPVVPVGVNDDEEDMKGLAR  
LIASLSIRSVEFLAYHELGVTKYGYLDRVYPLEEKADGDPEKSIRRLAKLFGDYGVKASG  
GSGG\*

>SPBDM4\_v1\_50048|ID:27158411| protein of unknown function [Uncultured spirochete bdmA 4]  
VICEEFHAPNRKRRDQPCPFHVFLIVIHSGDDGNPYGHIHVGARELLEVFYPLVSGPN  
DSSMPFGIEGLEVEKDMIEKRQAAFDRAPRDVSGSLDYGIDASRLHPLKQRLKEIDLEKW  
FPARKSYSPGGGVKLAILQHFAVHLIDTHPPFHRERTSGADLDAGTTQDTGAAIDPSL  
SIIVAADGLRGAGFETGVASDTPRDIEQFGFEPLRFGVCTPQTAERTTFEKDDGPDSRT  
VMD\*

>SPBDM4\_v1\_50049|ID:27158412| Pyruvate formate-lyase [Uncultured spirochete bdmA 4]  
MNPTIGEYPNPSSRIVALKQKFLDYESFMCCQRARIYTEVYRETEHQPMIIRRALALCET  
LRQIDLFIEDGELIVGHPASRPSAEVFPVFSFHWMEIDEFETREYNRLKVTSEVKAML  
AEIHPYWEGKNPTDKFRARRPEETKRAFAAGLLSNPHEWSTFAHVGLDYRKILTKGINGL  
LEDIKKQKASMRITDPDYHGRSVFYDACEIICEGVVDYAHRYGELVDSFIARTRDPVRAS  
ELQGMREVLRSVPLYPARTFHEALQSFWFVQLITQIEGNGFSISPGRFDHYMNPYLEKDL  
EEGRLSVERAIELLDCTWLKFAEIMRVDDKKA AEVNAGYASGQNLVIGGIDSKGKDSTTL  
LSYLCLIANYHVRLHQPNTVRLHRGTPEEFLEQVVLSSISGNGMPQVLNDEIIVPSLTG  
RGLPLAEAREYIPVGCDEITVPRMWGRCNGGYLNFPAKVLEMTLNEGVDMMKYGIAFGPEPS  
LRMIGSWDEFHQAVLEKIDYAVRQVSEANLTDRIHEEILPLPFLSMFLDDCIETGKDVT  
AGGGHYNTTGLVGVGSANIGDSLFAIKRLVFDEGRLLAELRSVLLADFEGNEPLRQYIL  
NKIPKFGNDEDEVDQYVVGVTNRFFDAVDYRNNRGGPFYPALYSVTAQVGLGGATAASA  
DGRKSGPLADGLTPMYGQDVHGPTAALKSVVKVDLVRSPNGVIVNQRLTSGILGTPKGR  
EKMELLLRSFVDIGGFHWQFNIVDNKELLEAQVHPEQYKGLVVRVAGYSAIFIELSKKAQ  
DSVIARNAASL\*

>SPBDM4\_v1\_50050|ID:27158413| TRAP dicarboxylate transporter, DctM subunit [Uncultured spirochete bdmA 4]  
MAVALLGILLLLILMSVPIAFSIGISSFLVILMEGNLTPWIMIQRFTGGGLDSFVILAIPL  
FLLTGEVMNRAGITDELIDFSSTVVGHIRGGLAHINVFVSMIFAGISGSSTADTAGIGKL  
LIPAMIKRGYSKEFTVAVTAASSTLGQIIPPSIIAVIYAATVGISV GALFLGGAVPGILI  
GLAQMVSYSIFARKYNYPAEERSSFRKILHAFK KAILPMLSPVLLIGGIIGGIFTATEAA  
VVS AVYSILIAIFVYRSIKL KELWDIFVTTALNASVTIFCIAIAAVFGYLLAYFHVPEML  
GSVITQIASGPVSFLIVILLFLIVGTFMDATPAIIILAPMLAPIACTFGVNPIHLGVII  
VLTALGLITPPYGLCLLVAAQIANIPVNFKLMRTMSIFILVSLLIILIALFPDIALFI  
PKIFAPKMMGVTL\*

>SPBDM4\_v1\_50051|ID:27158414| Tripartite ATP-independent periplasmic transporter DctQ component [Uncultured spirochete bdmA 4]  
MNKISTVLEKIIRFAVGVLLIVLSANVLLQILSREILHIQTVWTDDEVARFSFIWMTMLGA  
SLQVKKKSHFAVSLFSLKGTVRLHSLVYALMAVLMVVFVIFWFGYKYTIQGWSRYSTSSG  
IRMAWIFAAIPVGGLLMLFFIVELAIADIREARKSSISAKGGD\*

>SPBDM4\_v1\_50052|ID:27158415| putative Tripartite ATP-independent periplasmic transporter solute receptor, DctP family [Uncultured spirochete bdmA 4]  
MKRIALVLCVLLAGGVVFADSDTTKAGVIKLCGIMVSKDYSQAKAAKYFAEEIAKETD  
GRVVIDVFTDGVLGSEPEMWEAINAGALDMAVVS PAYIGNFVPEYQLYDLPFLFKSRAHR  
DAVVDGPIGAQLDKLLEKKGNMVVLGQFGGTGRIMISRNKKIETIDDLKGLKMRVYASPV  
VVSTWKALGTLPTVAAYAEAYTALQTGVDAENETSTLITQRWYEPCKYISMTEHNINT  
RPFLIGAKQFAKLPPDIQAI FRKVGKDAQYAVKVEREDDARYIEQLKSFGLQILELKDK  
DKWIAATRDLRMNFVKKYNLEQTLKDIETTAQ\*

>SPBDM4\_v1\_50053|ID:27158416| protein of unknown function [Uncultured spirochete bdmA 4]  
MKS VKIGTLYLDPVRNPAILDTATWDIPAAIRLFKQMDATEWASLRASLADGRPGGIVQK  
RGA AFYLSSTMSFEGGICLLATLPDSQRAILHIYAPGAGEALDGSHSVFRDDSMSVSLYA  
AEYETLHTLIRRLNPLKGPALGSVPRIGIGSRNSTLAWPAVYRSMKSGGFAANSIQNSM  
REIGTLQEVSTNEAVDRSYLYGFGVPPAYTGATFEGVWVTYGVLEALSSDFLPIFGADAD  
HLQLKSDVRSVERMKKILNARHYSFFTMDISQIADYQAMFRTSLSGAAELDRHIPQDA

LRKDVLMWHRQRYWFNGREYRFDEALLGRLVGKYWEALSLLEKYFHLIRDMKQGEPDFDE  
LTIDEVPPGIHTHEIITGEEELLFLLNEAERRGLSLTHVAPNFGIEKTTDYCGPDGLEGL  
FRRVSNLHAI AEQYGLMLDCHSGDDLSDETR HVFGRATGGRIHYKISPSIGDVFAETLFD  
YDRERFMVWVNDTMEFARKCAAEGSGLATALLASRRDRGNGTPNPKDFLFKEFKFTMPGR  
KDSTGQMDGREFFYDLPEDFKNEYSARVEKWILQVSRSLFDYQ\*

>SPBDM4\_v1\_50054|ID:27158417| Transcriptional regulator, DeoR family [Uncultured spirochete bdmA 4]  
MIISTIMGRVTDIKNYLRQQEIVRMLQTEQIIRVSELINRFSVTPATIRRDLSVLERAGK  
IQRTRGEARIVQSQSIVLPFFQRSELQTSEKIAIAKTARDLIADNQAII LDSGTTTLAIA  
QQLFNKKQLTVITNSIPISYVFANQDIEVRLSGGIVLPAHMALIGPDAEAYFRGIQVDIC  
FIGASGVRSGSGFTTSSPFECSEIKQMMRAARQVAVVDSSKFSISR IIEFARFEEINKL  
ITTYPINDKESLSRLEKLGVEIYAQV\*

>SPBDM4\_v1\_50055|ID:27158418| protein of unknown function [Uncultured spirochete bdmA 4]  
MAKAKVGVAGYGVIGQRLGNRLWRLMPAADTP\*

>SPBDM4\_v1\_50056|ID:27158419|iolE| Inosose dehydratase [Uncultured spirochete bdmA 4]  
MEKTIRLAIAPIGWTNDDMPELGGEIPFEQCVSEMALAGFEGSEVGNKYPHDPEKLNKAL  
KLRGLTICNAWFSSFLTTPKPLKEVEHEFVQQCDFLYAVGARVIGAAEQGNSIQGKPLPVF  
DAKPRFTDDEWKRLTDGLNHLGAIKQKGMQLTYHHHMGTVQTTEEIDRFMEMTDPPELV  
GLLYDTGHLVFSGEDHLAILKKYVKRIKHVHLKNIRFDMLEKAKREKWSFLQAVRNGAFT  
VPGDGGLDFTPVFETLKSAGYAGWWVVEAEQDPAKSNPLEYALIARRYIREKAGI\*

>SPBDM4\_v1\_50057|ID:27158420|iolD| 3D-(3,5/4)-trihydroxycyclohexane-1,2-dione hydrolase [Uncultured  
spirochete bdmA 4]

METVRLTVGQAIKFLDNQFVEFDGKVEKFGVGGVIGIFGHGVVVLGGEALAAPGHGLTFI  
QAKNEQGAGHVAIGYAKQNNRRKIMAVTSSIGPGALNMVTAAGTATVNHIPVFLPLGDFV  
ADRQPDVPLQQLEVPHDYTISANDAFRPVSRYPDRITRPEQVMTAFLHAMSVLTDPAQGG  
AVTIALPQDVQGEAYDYPVEFFDQRIHHIERRPPTSAQTSRVADLIKASKKPYIICGGGV  
RYSEAGRALADFCCKFGVPFGETQAGKGSVPWDHPCNLSGIGVTGSLAANRLAKEADLVI  
GVGTRFGDFTTCSKWLFQNPVKFIAINIATFDAYKMNAEPIIADAKLTLAAVGRALGAA  
GYHANWGEAIARAREEWSREVDLSYTOEDPAGLSQIRVIGELNDVLLPKNAV VVSGSGSI  
PSDMQRTWRTRVAGTYHMEYGFSCMGYEIAATLGCKLAMPRECVAVIGDGAYTMLHTEL  
LTA VQEGKKIIVVCDNSGFQCIDNLQHSQGIAHFANEWRARDPETGLLAGDQVPVDFAK  
NAESWGALGLRARTVEEFRKAVRRALRAKRPVVIHARVSPKSMTQGYESWWRVGTAEVSA  
NPQVVRAAREMKDELKKARKF\*

>SPBDM4\_v1\_50058|ID:27158421| Myo-inositol catabolism IolB domain protein [Uncultured spirochete bdmA 4]  
MVLHHSGDYADGYELLVLRDSEKANMMMDFASLSLKEGAIWRSNSKDERALLLAEGSVEI  
MVGEKVEWIGAGEGRTPDRSPVSVESLAEKGTRIRASRVSLLEENPAVLHLPAGTDVAVK  
ALSERALLYITATVNGTRFAPRLYLPYECQVEYRNEGTMQGTGTRIVRTVFNKNNAPWSN  
LVLGEDINLPGRWSSYP SHHPQPEIYHYRFFPSQGFGMTALGTEAYQLHDRDTLLITDN  
KDHPQVAAPGYTMWYLWVIRHIEGNPYISPEFNPDPHVWVDQPGAKIWDMMKRTGR\*

>SPBDM4\_v1\_50059|ID:27158422|yrbE| Uncharacterized oxidoreductase YrbE [Uncultured spirochete bdmA 4]  
MANKITVG VIGAGRIGKLHISNIVYYMPEARVKT VADANLTPEIESWVKSMGIPNVSKNA  
EDILSDPEISVVMICSSTDT HADYI I KAAQAGKNIFCEKPVDLTIEKVKAALAAVKKAGV  
RLQIGFNRRFDHNF AHVRELAKSGSVGQVQLVKITSRDPAPPPAYVKVSGGIFLDMTHI  
DFDMARFQAGSEVEEVYAAGAVLVDPEIGAAGDVDTA IITLKFANGALGVIDNSRKAVYG  
YDQRVEVFGSAGAAA AENDTPSQVRLSDANGVHGDKPLYFFLERYREAFVAEMKAFF EAI  
RTGTETPVTGNDGLMDLAIGLAAKKS LAEHRPVKVSEVM\*

>SPBDM4\_v1\_50060|ID:27158423| Xylose isomerase domain protein TIM barrel [Uncultured spirochete bdmA 4]  
MIESKR FALNRIAAPALGLAEFFEAATGLGMSSVELRNDIRDGSVTDGLKGT EVLRLAKA  
AGARIITINALQQFNLPGARAKAL SELEKLLALCVEIECPALVLCPNRPDDVVRTPEQKY  
RDTVEALNTYAPMFSTHGILGYVEPLGFGISSLSAETALKAIGESGASCYRVLIDTFHS  
YLGPDKPEFFSDAAVIGKIGLVHISGVEAGIAKSEFADAHRVLP GPADLMQSAALMGRLE  
KEGYRGLYSFEPFSSEVQSLGKKELVEALRASMNFLAKA\*

>SPBDM4\_v1\_50061|ID:27158424| exported protein of unknown function [Uncultured spirochete bdmA 4]  
MRNHILNGAFSRIGTMRMAIATTMLTLLLCGQPLTAQNQIPSPGDPNPGGDRLKSALMN  
ATMRAIGFEIQMYEIRLNAAKNGPGDPANIPVFEAEIATLKDELAHTSQMAPSDFALPPK



EIVHITVTQPYTYGSMLEVDNMTRSGPFYHVTGITNDDFSLLEPGKKYALAIYVVRPRDY  
VLPFAENAYVYVQIGDQRTGPSEATADQQLIPESPTSPPPAIPPTPSFGILSLSPRQTG  
QEILLAINLGANSFTIRTASDGCTFKSSFRVDIHKAEGISPKLPHYDLTIYRIQPDECKM  
ILYDGVEIFDLAEDLSIAGPCTYSVTNWVYRSAERPQ\*

>SPBDM4\_v1\_50062|ID:27158425| conserved exported protein of unknown function [Uncultured spirochete bdmA 4]  
MKYTKYGAFLLVLCIGAVPDLFADKGMWPVNVLSEPSQNAIIFHNRKEEILVLGTELQ  
ADHQVDILEFIPFPSEPKVSIAQGNPFEEAEMLIKNGLEFVEYSKGLAGPSVIVFEG  
RLGPHDVTIVQIRDISGFADWTHAFFMNGIVVAASLDAATANAADYMRRGFTYFVFDYV  
HLSANSgaiaplvyqfkskqlypfktsnitgnegtanlililpgslgllqdhSDIKALQ  
RVSSSLFNWDLSSSAKLYPREIADIVGAHDFFGDQKIYLVRLRYSGPYYFEDDLLFDMT  
DIAPFAYKHVLYTPDYGNPLGGNYSLVGNLSKDELADIAEA YKLGANTWFFDPDILSLIQ  
\*

>SPBDM4\_v1\_50063|ID:27158426| conserved membrane protein of unknown function [Uncultured spirochete bdmA 4]  
LGQSAPLIDADKVHVAQYAIMLVEKRFLPLYSGLFGIFALFGISMTVIGATLTPKIFADFG  
WSYTTAGAVIAAGSIGYFLSSYMAGIFLSTVGLRLTISVALLLIFVGLEFFAATSIPWLN  
MLLYFIVGIGQGGIELSVDWATLRMEGPGGGRAMSLMHGAFSIGAFVGPLIIAILISAHL  
QWTLIYRIGIVLFLAIAIFMQFMPLAALGKDRGHIAGGSRRDLFRHPAYWLGFFALFVYV  
GVEMGISNWVAEYFVSVFKAPIPTGSFMVSLFWAGLLVGRFGAPFFQAVIKREKILVALS  
ALMAFSVIALAVIGFVGTGRIASAIAAMLVIFAGLGCIIYPNVMSIIGDFFPHTQSEAV  
GFAAMGGGMGGFVFPYLSAISAAWGIRMGFMTYALFSLVIVVLNVSLVRAENRGGLAKD  
A\*

>SPBDM4\_v1\_50064|ID:27158427| Transcriptional regulator [Uncultured spirochete bdmA 4]  
MTSIKDIARLAGVSPSTVSRVLNEREYVRAEVRQRVLDIVKEKGYVQNHVARSMVLRRSF  
TIGVVIPYLFNMFORQLFASMEFFLEQHGYKTQFFFLRWSDSSEQAFLRRLKGETLDGII  
FIHELDNPEIYQYIQERSLPVALCTFEKREFGFPVHIDEESAELAVDYLIQRGHHSIG  
CITGEHFSFGRQREDGYKRALAAHGISYSPELTVRVPSYNPEAGHTGMLSLIRKQPLSA  
VFAATDELAIGAIALCESGLKVPEDVSVIGLDDIDISAFITPGLTTVRQPIFEMGKKS  
DLVCEWIARDHIQEKVESFTTTIVERESVRTLH\*

>SPBDM4\_v1\_50065|ID:27158428| protein of unknown function [Uncultured spirochete bdmA 4]  
MDELMQALKNAMKSEIDSVTIYSEAALRAESDVAQFFASRAEEEEKRHYNWLLSYYKELLG  
GQMPTINLAAEIQASQHKSPIFSQDFLTRVASDRHVSAAVSSAVLLELNATQHYQKMADL  
AEEPHLKAFRSLSEWEMRHYEELLKIQEDSRHYWFEEQNFEFP\*

>SPBDM4\_v1\_50066|ID:27158429| Adhesion protein [Uncultured spirochete bdmA 4]  
MKYIHRsADVRRFSK VFFVFLAAAGTSFAQPKKALTVA VSIPPMREWVNRIAGDRV  
AVTLIMPPGSSPHAFEPSRQLVELGKAQVWFSIGVDFEYSLRPKVSAMYPRLAIVDVTK  
NVKFRTLRPGEQETEHSTDGHIDPALNDRDQHTWLGYEQARTEIAFILDTLIARDPAGA  
EVYKANYENYMKIDAVYVSLKAKLAPLSGSQVVFVYHPAFGYFLDMFNITQVAVELGGKE  
PTQKELMALVDLAKKEKARAIFTAQFSESAKAVAGAIGAAVVPIDPLAADWLENLSRM  
GQALLQAVPGGK\*

>SPBDM4\_v1\_50067|ID:27158430| ATPase component of Mn/Zn ABC-type transporter [Uncultured spirochete bdmA 4]  
VSDIIQNAQQAQGVNEVHMPHPPENVAIWCQNLAHFYREAEVFNNVSFHVHRGEFVALTG  
KNGAGKSTLLKLIVGLLEPTRGQVLVFGAPPRGRIESIGYVPQHTGFDAAFPIRVEEVG  
MGRLSGLSPVAKHQKQOEI EWALRQAEVCDLRERPFSA LSGGQRRRVLVARALVGHPKLL  
VLDEPTTNMDAESEK KFYDVLARVKGNTTVLIATHDSDFVSALAETVLCVGGQDIDHPSV  
HRHAIEQVNVNVPEDIYGGKVVRVRHDIELPDDACCEGKE\*

>SPBDM4\_v1\_50068|ID:27158431| ABC-type transporter, integral membrane subunit [Uncultured spirochete bdmA 4]  
MNGFLQALTNPSVPFVRNALIGSMLAAFLFGVLGSLVTVRRIAGLAGAISHTVLGGIGLA  
LFLASRGAPKWVSPMLGALVFAVLAALLISLVSLKAKQREDTVINALWAIGMSLGVVFLA  
KTPGYADPMSYLFGNILLVTEQDLYLLAALDVI VLLL VVRYRHHIEAASFDEEFAATKGV  
PVTKVYLVLLIVIAVAIVLLQTFVGI VMVIAMTLTLPAGTAGYFSRNLAGMMVNATILSLI  
FSVGGGLVVS WHFDLPAGAVIVLLSGAVFIAFSAGKMLAGRR LAKS\*

>SPBDM4\_v1\_50069|ID:27158432| Fe<sup>2+</sup>/Zn<sup>2+</sup> uptake regulation protein [Uncultured spirochete bdmA 4]

MTKARTHVLEAITQAKEPVSARQLCEKFQSDYDPATYRALHYLEGKDRDLSFILHCSEH  
GTERYYVLHSNEHRHWFHCERCHRFTDLGLCRFDDLVAQMSAEKGLAITSHTFYATGICP  
ECRQKI\*

>SPBDM4\_v1\_50070|ID:27158433| NQR2 and RnfD family protein [Uncultured spirochete bdmA 4]  
VIKFLKQPMRKLVLIALAPIYLFSLWMYGLRVLAAALVVFVCGIGTEWLFERKRQGVSE  
AVLVTCALYTLAWPPATPLWILAVGIVFAVAMAKGVYGGFGRNIFNPAIAGRAFYISFA  
IVLSRAYTSFGNFGIGAVDVLSSATPLAQMRAHTVPISNLLFGLRPGAMGESMTLLIVL  
AAVYLVLTKTASWRIILATLAGGAVTNLILATGAQKALPMESLLAGSFLYMSVFMATDP  
VSAPKRQPSHYIYGALIGATAVIIRTFSAFPEGTSFAILFGNTFANLIDIAVDSFKKKAP  
APDQKPAGSDASNPPAQAAPRRTKGGGA\*

>SPBDM4\_v1\_50071|ID:27158434| FMN-binding domain protein [Uncultured spirochete bdmA 4]  
MKLNRNSIYYAAVFTFVVCIVFVVILAIANQVTISRVNANKKIESQTAILKAFGLADGST  
PASEIDSKYTQFITEKTVDKATAYIATIDGQPYIGIKLTMPGLWGPITAVLVTDTKGTVI  
RGFEVVDQQETPGLGGRISEPWFSAQFKGKQTLPDGTIAFVQSGGKGNFDPANGTVDAIT  
GASRTSDFVKALVNRELALARQIGGTL\*

>SPBDM4\_v1\_50072|ID:27158435|nqrD| Na(+)-translocating NADH-quinone reductase subunit D [Uncultured  
spirochete bdmA 4]

VSAPSKVFKDGLWYNNPIFVQVLGICSTLAVTNNLRNTLIMVLGVTFATSMGSLTLSALR  
ELIPRKVRMIVQVLVLSFYVIIDIVLRAYQPAISKQLGPYVGLIITNCILMGRAEAFAA  
SNPPGLAFLDGLANGLGYGWVLLVIAAIREFLGFGSLLGFKIVGDGFTPWTIMVMAPSAF  
FMLAIALWIANNHKAKAEAAKKTAAAPGAPAGASGAPAPQKS\*

>SPBDM4\_v1\_50073|ID:27158436|nqrE| Na(+)-translocating NADH-quinone reductase subunit E [Uncultured  
spirochete bdmA 4]

MIDAPNVGLLSLFLASILTSNILLANFLGTCFSFISISKDFKSSMGLGIAVTLVIGITSAV  
CWVVLRYIIIEPLGIEYLSFIIFIIVIAGVVQMLEMIERFSPALYMALGIFLPLITVNCA  
VLGVILFMQIRKYNFPQAVIFGFGSGAGWWLAIMLLASIRKLDSSNNAIPAGLKGTGITL  
ITIGFMAMAFVGFSGMIAVQ\*

>SPBDM4\_v1\_50074|ID:27158437| Ferredoxin--NAD(+) reductase [Uncultured spirochete bdmA 4]

MNPILVGPLTVAGISTVLALIIAVLDKFLNNYGEVEISINGGEKKLQVKGGSPLLGTLAA  
ENIFVPSACGGRGTCGACKCKIVSDVGPLPTETPFMSQKEIESNIHLACQVKVRKNLEI  
ELPRELFSIKKYKSHVEKIRDVTHDIKEVLFLSDDGEIEFVSGQYVQLVPPYGEIKESV  
QRAYSMSSKPSERKHVELLIRLVPGGIATTYVHKFLKEGQAIELVGPFGFRVHDTPAAM  
ICVAGGSGMAPFKSIFHSLHETGAFPEKDIWYFFGARTSKDMFYLDELRELQAKWPRFHL  
VAALSEPSPEENWQGDGLITDVLDRYLQTTVPKNDKGWEGYLCGSPGMINACINVMKKK  
GITEDKIYYDKFA\*

>SPBDM4\_v1\_50075|ID:27158438| conserved protein of unknown function [Uncultured spirochete bdmA 4]

MKQSPADKQAFQKMIPGVITAAGFLGDDDRSPERIIIEEDGIFFDELRLDFDVVSDKLEEL  
QHRGEAGLGEPITVGKLLVQSGDARGMLPCPWSGDGFFHKNAVSVRPADVPIESCVEGEDM  
LIYSELSVHMLRVHHFCQGRGSPFRLEPALIKRLLF\*

>SPBDM4\_v1\_50076|ID:27158439|pyk| Pyruvate kinase [Uncultured spirochete bdmA 4]

MEKRTKIVATTGPACSNLATIKELIREGVDVFRNLNFSHKTYDEANQDVTMIREARKALDR  
PAAIMADIKGPAVRLYGYTEQIALKPGAELTIESADSAIIEKLSSKKPMQVYTNLPDIDR  
ICAIGQKAILMDGYFTGKVIKVKVSKGIVVVVDNEGNLRPKAHLTLPGVDYPIPFSLDKDI  
ADIGWAVEQDIDYIALSFVRCATDVEEVRLVQRTALSQGKNTFIKLIKIESARGLENI  
DEIIQTADGIMVARGDMGVEMPIENVPIAQKQIIRKCYLAAKPVITATQMMESMMENPMP  
TRAEVSDVANACFDSTSAAMLSGETAIGKYPVQVVRMMRTVIEAVEKEFDYLDFFHHDVPP  
EVQNGDIPAIMSYNAVSVAYRCDAKALIVLTETGHAARLLSRLRPRMPIY AFLTNERLYH  
QMAINWGVVPLIHSGKGRRLDAVVNEAISICKHKALLKKGDRVVIVAGLPLAHQGTNMI  
RVETIE\*

>SPBDM4\_v1\_50077|ID:27158440| putative enzyme [Uncultured spirochete bdmA 4]

MNAPGQPGEAIHGAAPACQAVPACQTTTHSEPNL DLLAKLKEKNLAAQGLMVLEGRIAIER  
ALDAGIAPRFLVCTEAEEEEYWQARARKAAVTPDSAADPDGAAAPREDAAPQVIAPQAAVP  
SAFPPAFPVRVMSHEALCDLVDFKFRGAIAVADMPRIVPFEAEAA YAAPREVFLCLWDV  
TDPSNLGALVRTAAGLGLTGVLGPGCASPYRKTIRASMGNVFSIPIRSASLGTLEFLN

RNGARILAAALTAKAVPPEELGLHSLGLAPDSFGRPENRRSPIILILGNEGYPDEVLDT  
LCTDEVRIIPMSRQVDSLNVAVAGGILMYELLSLAYLPSRE\*

>SPBDM4\_v1\_50078|ID:27158441| putative xylanase/chitin deacetylase [Uncultured spirochete bdmA 4]  
MPIKKVNRFFSSEFTATNRALAAAFAFVLAALLAGCQTPPVQSNQSNIVQQAIPSPDQ  
ENDSSMVEEPSLDPVRWWDQKGQSPIRELVIETPEQLAARVPKRADPKIVILMYHNIVF  
GRTGGEYNRDLYNFDHDLVFLNRNSQIIGIDDLPIKSGEKKLDTASILTFDDGDLSIY  
AIVFPLKKYDIKATFFIITDFVGTGVYVNWEQLKEISDYRNARGEKLFSGSHSLDHR  
FDGIPAEQIPHELTESKFIEKKIGSPVWYFALPFGAGAGRKEIIDTARNAGYRGIRSSR  
KGVVHPGSIDLNLPAFYMSNERADILAQQIYSLGR\*

>SPBDM4\_v1\_50079|ID:27158442| putative Major facilitator superfamily MFS\_1 [Uncultured spirochete bdmA 4]  
MEQSYRVFAYRWAVLAATMLVNLTIQVLWISYSPITSAASYYGVSEMAVGGFFAMSFMA  
FIPLSIPASWLIDRFGRVTVGAASIAVGLGVARGAAGQHYAPAFVTCGIAAAQPFL  
NSWTKIPAAWFPARERATAVGLITIASILGTAVGLVLTPIAVSMSIARVQMVYGAASV  
AAVVFVAREKPKLPDESFRERAFMIEGLKHALKTPSFLRFLVIAFIGMGIFNGVTT  
WIEGIVRPRGIGSDQAGILGAIMLIGGVGAIVIPLFSDRAAKRTPFIILGLSGAIPGLV  
GLALAPGFGLIAASSFVLGFFLIAVNPVGMQYAAEAARPTPEGTSNGLVTLAGQISVLLV  
YAMEAINNITGTFTASLIAAAVLLGFSVLLATKLTEKGEPDQQLAKA\*

>SPBDM4\_v1\_50080|ID:27158443| exported protein of unknown function [Uncultured spirochete bdmA 4]  
MKSKSRKLFIVLAMGALVLSACQLSTGTVKSGSASDKGTVTISIPRVNPIYVASQGSVSK  
GASSKAFAYVDAIEVDLYQDGKQVAVSLGDAYDADANTITGNISVLAGTYSRLIVSVF  
NNAVSSSTEVVAGQTDGSFVPSGGSVDLSITLYSPNPVSLVKDTYSNQTKLSQYGEKWY  
SFEAPGTIATVTLKTDSDGLDAYIFGPDGKPLSGISGSGAEESDQFETTAIDIYYVCLIS  
PKETSTGEVKYENSSGMVNIAD\*

>SPBDM4\_v1\_50081|ID:27158444|glpK| glycerol kinase [Uncultured spirochete bdmA 4]  
MDRNASYILALDQGTTSRAILFNHDGIIIGVKQIPFRQIFPKPGWVEHDPEEIWQTQLD  
AAHGAIEAAQIEATQIAAIGITNQRETTVVWERATGKPVYNAIVWQCRSSGICDELRAL  
GAEASIREKTGLVLDAYFSGTKLTWLFREHPELVRAERGELMFGTIDSWLIYKLTGAHA  
TDPSNASRTMFFNIHERRWDELRLLDVPARILPEVKPSSGFFGMTKRELFGEIPVAG  
VAGDQQAALFGHACFEPGDVKNYGTGCFTLMNTGPPVESKHNLATVAWDLGRGYTYA  
LEGSVFIAGAVIQWMRDQMGLLADSAASERLARSVEDSQGVYIVPAFVGLGAPYWDSEAR  
GTVVGLTRGTSRAHFVRAALEAIAYQSMDFEAMEKDSGRELSCIKADGGASQNSFLMQF  
QADITGTRVILPEVSETTALGAAYLAVGLVGYWESLDDVRKNWRMRREFVPRMADDVRAG  
LVAGWRKAIATARTER\*

>SPBDM4\_v1\_50082|ID:27158445| C\_GCAxxG\_C\_C family protein [Uncultured spirochete bdmA 4]  
MTRKERAVTMHTAGSACSQAVFTVLAEDLGMSAPQAHLRAGGFGGGIGRMGLSCGAVTGG  
IMALSLALGASESADQETKLALYGVVADYIERLKA YKGTIECRALLDGADLWTQEGRDMV  
STRHLADSVCNPMITRAVEEAERILREKKGKLGV\*

>SPBDM4\_v1\_50083|ID:27158446| SagB-type dehydrogenase domain protein [Uncultured spirochete bdmA 4]  
MQYERFEGRWFLKSNWHLVKSGQSDQSKGVVPLQEEPPAPEDCIIDLSPDSLFKGEVA  
DAVSRASENEEGPPSSEGGVPSPAETGTKSSGLARAAVLYGLLHSRKSRRKYSADPLAL  
GELSULLWTIEGVKENRGKFSFRTPSGGARHPLDIYIFAHKIRGLNVGLYRYLPVEHQL  
VLERQGDDSEALNEALNGQFWNAACVVMWAAVPHYRSEWRYGKAADKLVALDAGHSCQNL  
LACESLGLGTCAIGAYDQEKLDAYLGLDGGDMFALYVAPVGRLTPS\*

>SPBDM4\_v1\_50084|ID:27158447| conserved protein of unknown function [Uncultured spirochete bdmA 4]  
VGQSHFIKTVEDIAEIMMCSVPGVKFGLAFNEASGPCLVRTEGTDPTLIEVAQHMAVAVG  
AGHTFYLVIGPGAYPINVLDRIKAGPETCRIFCATANPVEVVRAVVTGQAGILGVVDGFS  
PKGVEGEDDKAARKAMLRKFGYKF\*

>SPBDM4\_v1\_50085|ID:27158448| ABC-type cobalamin/Fe<sup>3+</sup>-siderophore transport system, ATPase component  
(fragment) [Uncultured spirochete bdmA 4]  
MSPKHEPRHTEQRQSLPPIGPSANLPVVEASSLAIGWKQGRNLQILTRNINFQVAAGHL  
IALVGPNGAGKSTLLRTIAGLQAPCGGSLSLERDITLISAEERASLLACVFNERIEAGY  
LTVWEFVAFGRYPYTNAHNRLTDEDRRHIATALALVGMERFAARTFSSLSGEEKQKVQIA  
RAVAQNTPLLMFDEPTVFLDAPSRIEIFKLAERLVQEEGKTVLLCTHEVDLALKTADELW  
VIDREHRFSAGAPFVVARSGAIGRAFDLPTVAFDVISGTFRAREPQR\*

>SPBDM4\_v1\_50086|ID:27158449| Transport system permease protein [Uncultured spirochete bdmA 4]  
MNKNTEPESRQIGDRAPHKSRARLIAGLGACTLLLALLDISVGSVRIPFAEVWKALIGQA  
SRQEWATIIHVFRPKMLTAMLAGASLSVAGLVLSIFRNPLAAPDSLIGAGASIGVAV  
LMFAGGALGALGAGAQQIGTQGSAILGNLPLGYTLLVIAASLGAGVVVSIILLISRKFE  
QVVTVLIMGLLVGYLTSSLVSLVYFGSPQKVQLYLSWTYGSFGGVRTNELPYLAGATLI  
GFALVGS DIKALNAFLISERFASTIGIRVRASRTRLLIAASILAGSVTAFCGPIAFLGIA  
APHAARLLSRS AEHRILLPITALSGMCFALLADMLSSLPGHGAVLPINPLLALIGSPIII  
SMFFHRDRGSLVEEME\*

>SPBDM4\_v1\_50087|ID:27158450| Periplasmic binding protein (fragment) [Uncultured spirochete bdmA 4]  
MRRIVGIFLFLFLISISVAPAHQANFQIEQKNGYKILTVSKLWPGANSTRTYVLYPRGSQ  
APGGVKADLFIQVPVQRVVLYSTTYIPAIEAIGELDTIVGVDNANYVYSPALRARIDAGK  
VVETTKNWMPDIERLIALKPDVVFNFVGVGNEWDTFPMQEAGLPVVLLGDWNEQDPIVRA  
QWAIFFIAFFNKEARAQERVNAIAKAYDTLKTAAAGAPSRPRVLVNGPFQGIWTVSGGQS  
YMARLIADAGDYLWADNKESGGLNLSIEAVFERALRADVWLNVPVYGANRLSDVRGLDPR  
FSALPVLKKGQVWTNELRMSPGGGSDYFESAVMNPVLVLEDMIAIFHPELLPDHKFNYYK  
KLNE\*

>SPBDM4\_v1\_50088|ID:27158451|proB| gamma-glutamyl kinase [Uncultured spirochete bdmA 4]  
MDLSETADAASARAALANANRIVVKIGTATLRTFGADGKSFLSEK GAPGTSPPRTPPSQ  
SAKGTIDTAYIYHVAEQFANLVQDGKQIILVTSGAIGMGARELGLTKRVTEVRMRQACAA  
IGQPILMEEYRRAFGVFGLSAAQLLVTRDEWDDRASYNLNRKTVETLLESRVIPVFNEND  
SVSTAEIGNAFGDNDRLSAYVASKIDAELLIILSDVDSL YDADPRENP DARPIPVKELS  
DEHLAAAGGRGSEFSTGGMKTKLAAVAIARDAGCRV VIAHGREPDIIQRVVS GEALGTLF  
DAAHALKNRIRWLKNSQPRGRLTIDEGALAAIRGRNSLLPRGVVAVEGDFGRGAVVLVND  
IVKLISNFSSAELRAVLRKRSEEIDA VLG ENAPHLVARPEEMAFLDE\*

>SPBDM4\_v1\_50089|ID:27158452|proA| gamma-glutamylphosphate reductase [Uncultured spirochete bdmA 4]  
MNMQERLERAALAASLLSAGTEVRNAALAHARQLEAHRDELPHANQKDMDEARAGGLA  
APLLKRLLFDEKKLSEVLSGIRGLRAMPDSVGKVL EARLLDEGLVLQRISCPGLIAMIF  
ESRPDALVQMASLAVKSGNAIVLKGGEARESNQALASVIARAGEEAGLPTHWLTLETR  
EEISELLTFDQYVDLVIPRGSREFVAKIKATSRIPLVGHSDGVCHVYVHEDADPAMA AKI  
AVDSKTQYPATCNAAEVLLVHERYAEKGLVPLL RALS RVGVLDVCERTAAMLEKARAEG  
EIVPHSLKSDADWSVEYDLRMAVKIVDSLDEAIVHINRYGSGHTDTIVCTAFEAAARRFL  
TEVDSASVYHNASTRFADGYRYGLGAEVGIATGKLHARGPMGLQGLLTYKWLLEGQGHIV  
EDYASGRRHFLHRDLPLD\*

>SPBDM4\_v1\_50090|ID:27158453|ykwC| Uncharacterized oxidoreductase YkwC [Uncultured spirochete bdmA 4]  
MPQQTIGFIGLGVMMGGAMAGHLRASGERLLVYTRTKSKAQLLFDAGA EWRDTPKKVALEC  
DVIFTMVGYPDSVEEYFGPEGLIENARPGTILVDTTTSRPDLAVRIYEA AKAKGLGALD  
APVSGGDVGAKNASLTIMVGGDEETFQRAKPILEEMGKT VIRQGGPGAGQHTKMANQIAV  
AGNLLGAVEAVSYAKKAGLDPRHMLLSIANGAAQSWQLSNNVPRMLEGDFGPGFYVKHFL  
KDLRIALDSAHSMRVELPMLALAEQLFAKMVAEGMGDLSTHAIYLLYERGLA\*

>SPBDM4\_v1\_50091|ID:27158454| protein of unknown function [Uncultured spirochete bdmA 4]  
MNQDKPENSKYISQTGNLWQHIFNTQQAGIVVSINGIIQQMNSTAVKMLCGQSSSDFIGK  
RFHETLISSEYIECTLERERQLRGGQPTVPPIEIRVRHLNGGESDALISATSWFKENDII  
VESMLIDITPLKQRELLLEAILGLMAIAGQEELSTHATPVLNHALNAMQKLYAEHHNCGY  
IGFSLHGNGFWEANSRMSSPGAPFLISYEPLSDMTRQWILDRDKMIAQCEPRKDTLYTIP  
IAPGQWGSILLAPLVLDNEPKGYFFWIFAA AFLPEEIEADAERRNTFVLAALTTVKTFLT  
GRDNARKSTDLAILHRATLEIGTMNSLQIADV ALEILEKEKGWHP SVIRFRSRAGEMLE  
TAA YRGSPTMSPEENRTRMDFLNKAIDRPGKGMIGHVIEQGKPIRSLDLPSDTHYIETAP  
GIKYGIYAPIVIEGNTEGAIGVESKDYSFTESDLRLSSIGEIVGMTVRSRLRIEMLRER  
VKWLEILHQINQQIGIEAKSRELYQILVDKAI EATGAEAAALLIYNPDKNILQKEVACGW  
LGTVFDRPLTPDEGISGKIFSMGQPHLSPLVSEDP LLIPRNRKL VPSDRANIGVPVVAEG  
IVLGVFHIAKAPAHFSREFVDIVEMFGSYAGIVIGRMQLIEALRNADRQMQTAYDETLE  
GWARAIGLRDDDTLRHTMRVVKIAVAIGKHLNLD SKTIENLRRGALLHDVVGKIGIPDTIL  
RKPGPLNDEETAIMQTHTSFGYELLRPIQYLEGALVVPDCHHERWDGAGYPRHLQGEKIP  
LLARIFAVADV D AMTSDRPYRPAHRSQE AIDYVRSQSGRHFDPHIVETFLAIIDEIEK\*

>SPBDM4\_v1\_50092|ID:27158455|thyX| Thymidylate synthase ThyX [Uncultured spirochete bdmA 4]  
MAHCSIPEAEAILDKEFPVLDKGFVRLVDYLGGDRRIIQAARVSYGEGTKSYREDAALID  
YLWRHEHTSPFEQVILTFHVKLPIFVARQWIRHRTARVNEISGRYSILRDEFFLPEPEAL  
APQSDDNKQGRSVTPFAAQTASQVQEILKEGSQISYARYKQLIDLGLAREISRIALPLSL  
YTEWYWQIDLHNLFRFLMLRLDSHAQREIREYAKVILEITRAVAPAATASFERHTLRGVR  
FSGPEMAELRRRLGIEVSDAHDQPDESAGMPPGLSKKELERFEEKLRSRQL\*

>SPBDM4\_v1\_50093|ID:27158456| protein of unknown function [Uncultured spirochete bdmA 4]  
MSITYFNSKPSAKLGHLPGETHPSQRMPLEARRRRGRHRPRYFKYHLCILADFALRVRI  
EPQHEEAEQVVQIDLPIPGIERERQGDARDLPGKAEIDQLFVARVGNLRTFFQNLNLR  
RGLRGEESDGTTLFVVIALRSERFGLGQEKFPVQYRVTAGDFVYASGAVTNPLPRHEDRQ  
FDVEGEYDLLEGARMFVPEIIDERGIFAVALRAFAVRDPRRLDDAPISAKIVDKAHEAF  
VEHRELFIEDRFCFGNTAMGHERIVAEIQKVESMRLSHNFSRHDTMGLMNSKIEVTFQRL  
PGDVLKIFFRACEEIHCDPELLELGEFEVSALCHALGNECRDAEATSGVQAAKLAEPSSR  
FVLVNGWQSWSFAGELAGGERPRRACYKRALNLFVDHPAEVALRQRARRFGHRHDHISHF  
MLGLRAADLRMLVSDNAARYQGALQAGGISGAAAADRVERGTQQARDASTGASAGHMEG  
RPAANTTLDAYLPLSFLLRDKTIRVFAYAEGASFARGEIARIAVLIAPDYFALKDRLG  
KLWGAPQRFDDLRLWLSSGAAAYTPAGVPAPAAPEQAVKPEMPAPAAPFKGVIGGYVSWYNH  
YTAIDERVIGEDLESIKANDNIVNTYFIERGRPTVFQIDDGWELAIGDWQAHPEKFPDGM  
ARMASRIRGKALIPGIWLPFLMPGSDTAKAHPDWVLRDTS GAPVKAGWNPWGGDVWT  
LDLSLPEVEEHLVGLFDTVVNGWGYRYLKLDFLYAGLMRGAFAGRKGGAWQHYARVMARI  
LEFSYAADGSPVAFLSCGAPIESTAPFMPLMRSGADTREHWEWPQAKLIGHQGRPSAKIN  
MEDSIGRAILDKTLCCDPDVIFCRTGRTSLRDTEKFLVGMMLAAMFGSQIMSSDDPAAFG  
KNPPSSHQLAETFTQQLMDWYGRMGGKEFGVERSHLRARDVYHFFTRDRSIYGGINLSD  
REGMFMLSGASGDTGGSEPDAAGESARPSTAAPLPRHSLIFGA\*

>SPBDM4\_v1\_50094|ID:27158457| Inorganic diphosphatase [Uncultured spirochete bdmA 4]  
MSKTVYVIGHKNPDTDSVVAATA YAALKCAQQQAHVKAARAGAVNPQTDYIFQRFVVALP  
EFIPDLIPKTEYYIDEAPPSIAENTPLWEALALLEKTTPRQVMPIVDGEGRYRGLFYNAF  
AKNILAKINPHRKA VIPTSIRHLVDTIKAQPLVAGDLDSKFNGRIVVASLSDKRFKDYIF  
AEPAHNKVVLVGDREEIMRIAIDAGVRALITNGFIPSKEIVRLAESKGVAMLISSYDTS  
STSLALYSTPVMSVADTSVKPLGARDLMKTAKHAISESAARAVPIVDENDRVLGLLTEG  
DLIREPNIELIMVDHNEFTQAVDGIQNYRILEVIDHHRIGTFSTTYPIMFINRVVVGSTST  
IVTSMYHETKTPLDRNIASVLLCGILSDTLVLKSATTTDTDREMADYLASITDLSIEDLG  
RDIMASASLAARLPIDQLLRMDRKEYEVQGGKCLTVSQIELTNSQELLARQEEVLQGLARI  
RAETGTYVAALMATDITKLESLLYINAEREFYPYLSYPVQQPGIYILKDVLSRKKQLMPA  
LTEMVQAALS\*

>SPBDM4\_v1\_50095|ID:27158458| TraB family protein [Uncultured spirochete bdmA 4]  
MPQTIRTIQLGERQIILVGTAHISKESIEEAKETIRQEQPQRVCVEIDMGRYQSIQQDSR  
WQDLDIKVLKEKKGFLLLANLALAGFQKRLGADLGTKPGEEMMAAIQTAEEMGIPWSAI  
DREIQVTLRRAWAKSNLWNKAKLLASLIESAFSREKLSEDDLEKLKEGTELEQMMNELAD  
FMPSVKEVLIDERDRYLATQIFLSTERKVVA VVGAGHMNGIETWLEKLARGEVSPDVSDI  
ESLPKPGWFAKSAGWLIPALIVALIVIGFFRSQTASLTMILRWVLLNGSLSALGSLCL  
AHPLTILGSFVLAPVATLNPVLAIGLFAAVIEAHFRKPTVRDAETLADDVTSIKGFYKNR  
ITHILLVFFCSSIGGMIGNFIALPVLASKAIG\*

>SPBDM4\_v1\_50096|ID:27158459| putative DNA polymerase III, delta subunit [Uncultured spirochete bdmA 4]  
MAEALIPPVWILAGPEIGLKEAFVADIVKKVRDLGGDEPEIHRLYAGDASPSDAISLLRN  
SSLFASWVIVEFRNVDQISQKADIDALARYCGAPAEQTVLLLETEGYSAPKAIEKTVPSA  
CRKTFEFELFENELAGWVRRELGQSELSDGEALESLELVPHDTASLKAACLILNSSFPA  
GSALSAENVEAAILRSKPEDAFTLFEKIGQGELSLSLEVLDTVLDSRRGDANQIIAALVW  
SFRRLQRIGDAVAHGERFEDVCPREGARSKTVQRQLRAALQHYKPEDCRRILALSETEA  
ATRGLPGSAFDRQLLHLLITSITEKGQGLAAAGWSEQGIYPHVL\*

>SPBDM4\_v1\_50097|ID:27158460|lexA| LexA repressor [Uncultured spirochete bdmA 4]  
LKDLTARQKEILGFIHEYIQTNNYPPTVRETARAFSISVKGAYDHLKALEKKGCIKTSEK  
RSRSIELVAPPEDDTPVQIPLLGEIAAGKPIFADENFERTILVPADIVANRVPHFALHV  
KGDSMIDAGILSGDIAIHERSETAKNGDIVVALLEENVTLKRFYIENNRFRQLQAENPRYA

PIYTQDLRILGRLRGIYRSY\*

>SPBDM4\_v1\_50098|ID:27158461|ptsH| Phosphocarrier protein HPr [Uncultured spirochete bdmA 4]  
MVELETTIKNRAGIHARPSALIAQTAIKFASRVYLEKAGNRINANSIMGIITLAASFGTK  
IKIADGPDEQRAADTIKALFESGFNEELG\*

>SPBDM4\_v1\_50099|ID:27158462|hprK| HPr kinase/phosphorylase [Uncultured spirochete bdmA 4]  
VKEQEPVNFVLDLLSLELKEQNDLKRCVAGRAGLNREITVPDLNRPGLALAGFYDSFA  
WERLQIFGRGENAYINKIEADGVAEQIYEKLFYQIPCCIFTNIEPTNFSAADAAGC  
PLLITELSSVEFTIRVIRILHDIFAPKIIMHGVLVEVFGIGILLVGDSGVGKSETALALI  
ERGHRLVADDVVEIRCLNGTLLMGQGTNKVIGHHMEIRGLGIINVTHLFGVGAIRDKKQI  
QLVIQLEDWDPNKVYDRIGIDELTMEILEVKVPKLEIPVKPGRNIPIIIETAAMNERLKK  
MGYHSAREFNQNILRWLESESARTMYFSRDDY\*

>SPBDM4\_v1\_50100|ID:27158463| Ribosomal subunit interface protein [Uncultured spirochete bdmA 4]  
MNIDVRSVHFDLSDQSRQYLDTKISRIDYAKDMIVDLLFVFTKDAGRFRLEVTANFRWGK  
QAHIVETSQELNPGIDMLIDKLEQKIVKEKEKIQEKK\*

>SPBDM4\_v1\_50101|ID:27158464| RNA polymerase sigma-54 factor [Uncultured spirochete bdmA 4]  
LQIQRPVLAQQQLKLSRMLQAIRLLALPLQELTEQIHQEELEENPALELLSDSGEVSL  
DVMEASIDTIKSDDDLREAEYSDDAFGFNGEENDRSIIIEQTIATEESLQDHLLGQLGL  
LSLREEERRIAERIIQNTDENGPHLSSPSEVCANCDEETLARILSLLQRLDPPGTCTSDY  
RESLIVQAEIASNAPPKTIEVLSRHFENLQSRNHGTIKKALGLDDRQLDRIIEFIKTLNP  
YPGRIFSKARPRYIVPDLAMWLEDGEIKVRLNDETVPKLGINRLYTELAARSTRGEAEKF  
ARERVENAHFFINSIKRNETLLKTAFAIAEAQKDFFTAGPKSLKPLALKEIAEKIGVHE  
ATVSRVVNGKYVQTDWGTFFELRRFTNAVNPENGENISKEGAKAEVLQIIGELESKGEKI  
SDRIIAETLARRGINVARRTVAKYRSELGK\*

>SPBDM4\_v1\_50102|ID:27158465| ABC transporter substrate binding protein [Uncultured spirochete bdmA 4]  
MKKLGIVLIIALLSVSMAFAQGTSTKDLSELITAAKKEGQLTVIALPRDWVNYGELIDTF  
SKKYGIKVNELNPEGSSGEELEAIRANKNNKGPQAPDIVDGLSFGPLAKQEGLITPYKV  
QTNWNTIPNEVKDSGDYWGYYGVLAFEVNADIKNLPKDWPDLKPEYKGFALS GDPR  
TSNQAIMTIIAASLSQGGSLANMEPGLKFFDKMNKAGNFVPLIAPGTVASGETPITVRW  
DYNALSNRDKSNGNPNVAVIIPETGVIAGVYVQAISAYAPHPNAARLWMEFLYSDEGQIL  
WLKGYGHPVRFNDLAKRNKIPADLVAKLPPSSAYEKAVFPTIEQQDTAKKYIAEQWDQIV  
RVEVMKK\*

>SPBDM4\_v1\_50103|ID:27158466| ABC transporter permease protein [Uncultured spirochete bdmA 4]  
MRDSLQKERFGRKGAASPEKAGGALLVHAAPRSKSKAWLGLIPFFVFIFAFMIIPAGSLL  
IGAFQRNDGHFSLVNFSKLFNPNISSYVVTIRLSFTTALGGGLLGFPIAYGICLGGLPK  
GTRSFMSTFSGVASNFAGVPLAFAFISTLGRMGLTVFLRTVLGIDLYASGFNLYSFWGL  
ALTYIYFQIPLMVLIIQPALDNMKKEWREASENLGASPLQYWLHIGIPVLLPSLLASFIL  
LFGNAFGAYATAFSLTGGLINIVPILIGAQIRGDVLHDPNLGYALALGMVFIMTLAILAY  
SWLQKIASRWMK\*

>SPBDM4\_v1\_50104|ID:27158467| ABC transporter permease protein [Uncultured spirochete bdmA 4]  
MKNGTATRKAWSFWLILGLLYFFIPLISTFLFSLRGKKGVLVSVAYQHVFADPKFLQSF  
LFLSLQMSVYTIIVGLVLIVPTAILINLKIPKAKPIIELFSLMPFVIPPVVLAFGLIKFYA  
NPPLTLVSSPALLVAGYVVISFPYIYRSIDTGLTSMCLKVLTEAAQSLGAGWLSILFKII  
LPNLR TALLSATFLTFATVIGELTLAVLLAWPAFGPYMAHVGRDLAYEPAALAILSFMMT  
WGSISLIQFLSHGIPGAKSEIGGLH\*

>SPBDM4\_v1\_50105|ID:27158468|potA| Spermidine/putrescine import ATP-binding protein PotA [Uncultured  
spirochete bdmA 4]  
MGFIELHEVTKSFGNNTVIKNSLSVEEGSFLSFLGGSGCGKTTTLRMIAGFEIPTAGQI  
LIEGKDVS RVPPAKRNLGMVFQNYALFPNMTVRKNIAFGLKIAKITKQEIHKRVDEMLAL  
IHMESYGDRYPHQLSGGQQQRVALARAIAVRPKALLLDEPLSALDAKIRVQLRDDRNIQ  
QELGITTIIYVTHDQEEAMSISERIAVMRNGRIEQGTGTPFEIYNNPATS YVASFIGTLNLL  
EGPVVDAARGTVELNGTMVRTVSDLRGLGKVKLTVRPEALS VARDADAGSYDPVNTIA  
GTVEMVKFLGSTVRFVMKFGETFMMDFNNSQLVLPKKGDPPIRVSF AIDACRLLPEGDA  
IAMPGSGDVEEMVH\*

>SPBDM4\_v1\_50106|ID:27158469| putative Protein GrpE [Uncultured spirochete bdmA 4]

MSKHKHEQGQSSNEMKPENEQTQNQESQPLVPEVEVQPGAAEQQGNHPGAVNTPEAQLAA  
AKTEIELLKTQFAELNDKYLRTLAEQVNFRRKRVVKEKEEFQQYAVSTLLNDLIPVLDDFD  
RSLEAVAQHQNDAKVVVDGIRLIQKRLYDTLSNKYGLSRYESNGGVFDPRLHEAMFSDQG  
DVPEPTVTQEFMPGYKLHDRVVRTAKVKVTPANQNGAASQSTETPADEQNASSDESASE  
DNAS\*

>SPBDM4\_v1\_50107|ID:27158470|dnaK| chaperone Hsp70, co-chaperone with DnaJ [Uncultured spirochete bdmA 4]  
MGRIIGIDLGTNSCVAVMEGGEPIVIANSEGQRTTPSIVGFTAKGERVVGQPAKNQMIT  
NAENTVFSIKRFMGRRFGEVLNETKLVYKVVNDNGNDVRVEAGGKLYSPQEISAFILQKM  
KKTAEADYLGEAVTEAVITVPA YFNDSQRQATKDAGRISGLEVKRIINEPTAASLAYGFNK  
DQKKEKTIAVYDLGGGTFDISILELGEVFEVKSTNGDTHLGGDDFDRRVMNWLVEEFKN  
DTGIDLSQDRMALQRLREASEKAKIELSNMQQTEINLPFITADASGPKHLQKTLTRARFE  
QMCMNLDRTREPCMALADAGLTAQAIDEVILVGGMTRTPRVQQMVREIFGKEPSKGVN  
PDEAVAIGAAIQGGILGGEVKDVLVLLDVTPLSLGIETLGGVFTRLIPRNTTIPCRKSQIF  
STAADGQTA VSIHVLQGEREMATQNRTLGRFDLVGIPPSPRGIPQIEVTFDIDANGIVHV  
SAKDLGTGKEQKIRIEASSGLNDTEIDRMVKEAEAHAEEDKRERERIDARNEADSLIYTT  
EKSLKEVGDKIGAKEKTAVESAIKDLKSAMEGKDTTEIKQKTEVLKQASYKLSEELYRHA  
SAQGGEAAGGTAGGASGATGGAEGEASSSGESNDQGGNADDVNYKVVDLDDK\*

>SPBDM4\_v1\_50108|ID:27158471|dnaJ| chaperone Hsp40, co-chaperone with DnaK [Uncultured spirochete bdmA 4]  
VAKRDYYEVLGVPKTATKDEIKKAYRRLAIQYHPDKNPGDKTAEERFKEATEAYEVLGDD  
QKRQAYDQFGFAGVEGMGGASQQDYSHVFHDFEDIFSGFGDFSSIFGSFFGEGAQQRGGT  
HVNHGANLRYDIELPFKAIFGTTIEISYNKDDVCKTCGGTGSRDSQGRKVCSMCKGTGQ  
VRRSSGFFAISQPCPVCHGEGTVIENPCPDCGGAGVVKKKQKIRVTIPAGVEDGKRIVIP  
GQGNAGANGGPAGDLHVFIHVRPHDVFERQDDDLCAVYVDFVTAVLGGEIVIGTLEGRK  
LSVQIPAGTQNGKLLRIRDEGVPVSGNRRGDLYIKVFVKVPARLSRRGREILEELKATEG  
ETSQPELIRLKDVPH\*

>SPBDM4\_v1\_50109|ID:27158472|copA| fragment of copper transporter (part 2) [Uncultured spirochete bdmA 4]  
MKKLLKIEGMSCGHCVMHVQSALEDIPGVKSAKVDLLERQALVEGDALDDQALRAAVADA  
GYRVLQIIP\*

>SPBDM4\_v1\_50110|ID:27158473|copA| fragment of copper transporter (part 1) [Uncultured spirochete bdmA 4]  
MSVHKTFAIKGMCASCVAANERAVSKIKGIARVSVNLATERMDVDLDPAEVDVSQIEAA  
VKKAGYEAELLEKPANAPLPTYESYGWKRFTISAIFAAILYIAMGSMGLPLPGFIDHR  
LHPLAFALAQ LILLIPVLIAGKSFYIHGFKSLFNLSPNMDSLIAIGTSSAILYSLYSISR  
ILNGDHTAATQLYFETAIIITLIMLGKNLESQSKRRTSEAVRKLMLKLRPTTATILDGEV  
ERKIPIDAVKPNVLLVRPGERLPVDGRIQSGISNVDESMLTGESMPVEKTDNAKVYSGT  
MNLNGSLVMVAEKVGEETALAKIIHLVEEAQSSKAPIARLADQVSAVFPVPTVMAVALIAA  
FGWIIAGHSITFALT VVSVLTIACPCALGLATPTAIMVGTGKAAELGVLIKSGEALETV  
HKVNTVLLDKTGTITKGKPELTDVIAAPGFSSDTVLGLAASAEIASGHPLADAIVASARE  
KGLVLSRPERVETVAGKGIADSGSIAVGNAAALAESLDISLSNQAPYLFNEAARLAGEGK  
TPMFVLQNAAPIGLIADVADQPRAESRAVVAALKKLGIDVAMVTGDSRRTTADAIAARVGIT  
EVYAEVLPSEKASIVKRIQASGRKIAMVGDGINDAPALAQADVGIATGTDIAMESADI  
VLMHNNLDDVATAIHLSRQVIKNIQNLFWAFGYNVLGIPIAAGILYIFGGPLLSPMFAA  
AAMSLSSVSVVTNALRLKGYRKPQGFGEQTAL\*

>SPBDM4\_v1\_50111|ID:27158474|acyP| Acylphosphatase [Uncultured spirochete bdmA 4]  
MKAFAHAVIKGEVQGVGFRMSAVIRAERFGLTGWVRNTPEGGVEVWAEGEAQSLEQFYEWL  
QIGPSSARVDEVLTDEQPRGFYKRFSVAF\*

>SPBDM4\_v1\_50112|ID:27158475| Bifunctional protein: zinc-containing alcohol dehydrogenase quinone  
oxidoreductase ( NADPH:quinone reductase) Similar to arginate lyase [Uncultured spirochete bdmA 4]  
MVSVMKAMVIRRTGGPEVFEQAELPIPQPGANQVLVVKVATSVPIDCKVRSGAVAILPP  
FPAVLHGDISGTVVGVGQDVYHFHEGDEVFGFVGTGGEGGALAEYAVCDAQLL SHAPRS  
LPLEEAAALPVIALTAYQGLRRKIRLGKDTLVLVQGGAGGVGHVVVQMAKAFGAEVAATA  
SSDEKIAVVVSSGADWTIRYDQEDVKHYVGRITDGKGFVDFDTAGGANLPKSFEAARMG  
GDVVTTAARATVDLSLMHSGKLNLYVVFSLPILTREGRDVIGQDLAAIARLVDDGHLRP  
IYPKAFTLDTIAEAHRFLETQSHYGKILVRVG\*

>SPBDM4\_v1\_50113|ID:27158476| Polyprenyl synthetase [Uncultured spirochete bdmA 4]

MTDYWKNFPHIADFLRDVEALILSILEDNAFPLGKDIEKLVESGGKMLRPALVFGSEFG  
LDRNPKKWKQKDKLVHVA AAIELLHTATLIHDDIIDRASHRRGIPTLHQTLGTTNAIL  
AGDWLLSRTYRIIAQYVHPNRAVLLTDSVSAICKAEINQDLVKYSFVSSRRRYLQTIAGK  
TAALFALALYIGASETGCSVFNQALRRRTGYNLGMAFQIIDDILDYESSLEELKKPVGND  
IREGLCTLPLIYALQENGKEIRPLSDIRTQPNLVESVLGLVLQTKAIERARSDAAHYTR  
LAHAEIERLPAGKPRHDLELIVNSLLVRTY\*

>SPBDM4\_v1\_50114|ID:27158477| NADH dehydrogenase [Uncultured spirochete bdmA 4]  
MATKKILILGGGYGGVWAGKILERHFRKREGVEITLVDKRPFHLMTELHEVAGWRTEPE  
SVQVLFKKIFGAKRINVVLDTIEKVDFEAKKATGKVQTYEFDYIILGVGAPEFFGIPGV  
AENSFTLWSFEDAIRNHIIEKFYEASLETDPDKRKRLSFVVAGAGFTGIEMIGELLD  
YRDVMCRKYFLDPKEVRVNLNIEALPSILPILEEPLRAKAEKYLQKRRCDVMLNSAIIGAE  
PGKVLLKSGEIVETETFIWTCGVKGSFAGQLGLPTGKRNRIDCDMELKSTKYPFVYVVG  
DISGLMLEGKPLAQIVETAHFTA EAVAKNIIADIDGGERHQFKPNYHGFMISSGSHYGVS  
NAGGMKTSGLALFIKHFVWYLLNIAGIDQVWEYLRHEFLDMKNRRSFIGDFVSYKVR  
PYWPLLLRMWLGLMWIFEGINKIGEGWLTFSAGSKSGWMFSPGVIQAGVKTA EATSGASA  
WESAGEAAATAGQAAVAATSAAASA AVSAAAAAPAATSAASAATSGVTEATTSTFKAVWDL  
TKPIFDPN SGIVTWRHTFLDG VFAHLPFTFFQVMIVVMEIGIGLALFGGCFTWLA AFGS  
LGMCLIFTMSGMFAWNQVWFVFAAILMLGGLGRSFGFDYWLIPA IKRWWNGTRFARKWHF  
YAGDPTK\*

>SPBDM4\_v1\_50115|ID:27158478| protein of unknown function [Uncultured spirochete bdmA 4]  
MERFLQRTGYAEDQILVSFARLIGDQFFGENRDILVNDESAEYRPLVAAMIGSFLEGSE  
ATDQNERGRLRALILAEHEKTL SALKQLFTEAHIGSAIVGSEEAVKEAGERLCSEPVVAM  
PASLFLAAVENGCFKPRDFGFLIIEGADIFSEQPSEVQRKIWGHLLPPWERRTALFAEHI  
GIRAKNTAIDFARNPKTIVL KKAQASLSAISTSMYRVSSEKKFRVLLSLIQEERQRGRKA  
VVVFCNLRQTSREVEARLRLNHIHAEHVSAAPKVNNEALLRRFSELAGSEKERGGYEER  
EHLV FVVSNDNLEVL PSEFAPVGIHYDIPLDADVLERVRTMHLRNATMAGLVCERYEYG  
LSAITSRFGIQFELKEPSEM QECRDASEGVSLDLERDHPADRQTPRRRNEWRASEAPPG  
GSDRRNRHNQESRRRPRSKHTKRSHRAPALHNSDET GQDQSLYSMSTEERLAYFRNKYRNI  
LKTPIQPPPQQNSTPKTNETA QDNREPDNNSIVKRFIGKFMMSGGKGSQDREEH\*

>SPBDM4\_v1\_50116|ID:27158479|glgP| Glycogen phosphorylase [Uncultured spirochete bdmA 4]  
MKIVSHTIKPALKGRLARLDLARNLWLSWNFD AVSLFIRIDSGLWADSGQNPVKMLGTL  
SQEKIDELASDQSFLSDLDDVYARFQRYLKNRPWYRGPVDKTIA YFSMEYGLDVS LPTYS  
GGLGVLSGDHMKTVSDLGLPLVGVGLLYRQGYFKQYLNADGYQQETY PENDWYNMPVERC  
VDQDGTPIIHVDMAGRTISAGIWRVDIGRAQLYLLDTNIHENQPEDRTITATLYGGDKE  
MRIKQEILLGIGIRALKALGIEVAATHMNEGHS AFLALERIRALMEEYHLDVHAAIQAF  
TPTNIFTHTTPV PAGERFGIDLMDKYFHSFVSGLGLDWNEFLGLGRENPFDSQESFCMT  
VFALHLSAKSNGVSR LHGEVSRKMWKGLWPDELEKEIPISHVTNGVYPRTWISHDMLDLL  
DRFLGPKFYFEPD NAEVWARLESISDEELWRTHERRERL VATCRQRLAASYVRLGMPDG  
EVVRSDDLSPYVLTLSFARRFATYKRG TLLKDPDRLIKLLSNKEMPLQLVIAGKAHPH  
DAAGKDLIRELVHFSRREDVFGRI VFIEDYDMAMGRYMTSGSDVWLNTPRRPLEASGTS  
MKAGMNGVLNCSVLDGWWAEA YTSDIGWAIGSGEEYHDEELQDKIEAEDLYDLLEQEILP  
LFYSQGRDNIPHGWLKKMRASMKAIGSQFATHRMLKEYYTEYYETALAESRALEADSYKA  
SVSLARYIEKVRRAWQGVKIVEFVDDGAPVVS RGTAITVRALVDLAGLSPDDVAVECYSG  
RLSSKGEILDGVRV PMSLVGQEGQHRYQYVMHGEMTGQIGHSVRVLP AHPALDGRFIPG  
LVRWAQ\*

>SPBDM4\_v1\_50117|ID:27158480| FAD dependent oxidoreductase [Uncultured spirochete bdmA 4]  
MEQFDVAIIGAGVCGANIARKLSQYELGVVLEKEIDVSLGTSKANS GIVHGGFHDHIST  
LKARLELRGALMFDRLHEELDFPFERC GILVAALHEDEMRAIEQLYLQGVENG VIGIEMC  
SRERMLELEPKLNPDVVGGLYAPSGGILEPYRFV FSLVESARQNGVHVKTEFEVASAERQ  
GDCWQIRAKDGQEIRARYV VNSAGLHADTISA AFGAERFTIMPRKGEYLLDR TTRAKPS  
RVIFPVPTVSKGILVIPTVEGTVLLGPTASSALGKEDFATTRDQLEHILHSARMMVPAI  
SENDVITSFAGLRAAYGSDFYIAISEKVP AFVQVAGIQSPGLTASPAIGEYVKDLLKAG  
LRLVEKPEWNPSVHKVPRARDADPFALDTLIA QDPA YGDIVCRCERVSEAEIVA AIRAGH  
TTLDGIKYYTRAQMGR CQGGFCTYKIIRILMRETGMSFDQITKRGGDSVILKGS L\*



>SPBDM4\_v1\_50118|ID:27158481| FAD-dependent pyridine nucleotide-disulfide oxidoreductase [Uncultured spirochete bdmA 4]

MKQLTFDAVVIGGGAAGMAAALELDARGHSVLILEREDTLGGILMQCIHNGFGLIEFNEE  
LTGPEFAQRFEVVGSRHIQASLRRTVLDIREEGGLKAVYCVSPAQGMRRVESRAIILAM  
GCRERNRGNIRIPGTRPAGIYTAGLAQRLVNIEGYIPGRDVVIIGSGDIGLIMARRMSWS  
GCKVHAVIEILPYPGLTRNIVQCLNDFGIPLHLVTDIYGEDRVEGIEVTPIESGAL  
MHEKAFKACDVTLLSVGLVPENELSRNAGIEIQPTTNGPWVDSALMTTMPGVFACGNVL  
HVHDLVDYVVEEARRAGANAAAWLSGYRPAEIRAKTGSNIRYVMPMRINPERENRLYMR  
SLVVKNDARLEVRDGNVVKSRKLAHVQPSEMLS TLIPEDLAAAGRSTVEIALV\*

>SPBDM4\_v1\_50119|ID:27158482| conserved protein of unknown function [Uncultured spirochete bdmA 4]

MRELICITCPMGCHLAVDTDERGERMKTGNRCVRGEQYAREEIFNPKRVVTFTCAA VLPD  
GSVPGPESNLPRRVPVRTTIAFPKERIPELLGALRGM TIRLPAVRGSVVLK KALDTEVDV  
IVARSIASE\*

>SPBDM4\_v1\_50120|ID:27158483| Heat shock protein Hsp20 [Uncultured spirochete bdmA 4]

MNKRPYMDIGSIFDDIFEAAKDFGERMKNFAPGFEGPGDPDEHDEGSGKRP GCHGMGGGA  
WFEAHGDDNDVYYPNYSYPLNVYMLPDKSLVFEFAVAGFDEKNMSLSFQGDYMFSAKI  
DVTEQPEEGVRYFKRRLKLDIDKQKYYVPADKFDQEKVKA AFRNGILKVTVPPKDVVDT  
PEGIKIEIVKEGE\*

>SPBDM4\_v1\_50121|ID:27158484| 2',3'-cyclic-nucleotide 2'-phosphodiesterase [Uncultured spirochete bdmA 4]

MKRFLVILCALLAMTMSLAAQSKSVDLTFIETSDIHGAIYPYNFITAKPAATSLA QVASL  
IKEERSTSDSEVVLENGDSLQGQPTVYYYNF EKTS GPHIWSQAVNSLGYDAIGVGNHDI  
EAGHAVYDKLYEEMQAPVLCANAVNPDGTPYFQPYAVINKGGVKIAILGMITPKIPDWLP  
PQFWTGMQFEDMVQTAKKWVPIIQEKEHPDLLVGLFHAGVDYTYGNVTRDTPN NENASQV  
VAEMVPGFDLVFVGHQGWGQGWDPVNKKKIDVKDPNGKVVP IYGPLNAARNVAVVKM  
NLTWNDQTSWDKMVRGGLVDMTKYQDPDFMAKFQPMFDEIKTWVDRPIGKMDGVISTR  
DSMFGDSAFVDLIQRIQLDL SRDPSLGLSPADV SFAAPLSADAKIPSSPDGTL YVRDMFN  
LYVYENFLYTMTLTGQQIKDFLEYSYQYWFDTMPNDGDHLIAFQK DKEGKLVFDNRTNMP  
MTATRYNYNSAAGINYVDVTQPPGNRISISCMSDGRAFNPD ETYTVAINSYRGS GGGG  
HLEKGAGLDKDTILSMKLVNGATTKDLRYFLLKWF EKQEGPITVMPIGNWEVIPS DLAAL  
GEKTDFFLLYPSK\*

>SPBDM4\_v1\_50122|ID:27158485| NADPH-dependent fmn reductase [Uncultured spirochete bdmA 4]

MLKIAILTGSTPGRNNEAVAQWVLDQAKSRSDAEFEIVDIKDYNLPLLDEPMPPSLHQY  
TKDHTQKWAQKISQFDGFIMVTPEYNHG TSAALKNALDFLYAEWNNKAVGFVSYGAMGGT  
RAVESLRLVAGELQMADVRTAVHLSLFTDFENFSVFKPAPIQTD TLKTMLDQLVLWAGAL  
KSIRA\*

>SPBDM4\_v1\_50123|ID:27158486| conserved exported protein of unknown function [Uncultured spirochete bdmA 4]

MRPRLAMLMLVLVLA SLFGAGAQPVVSTKQDIAVFALGY YGWFIQSALGTIDLKIQK  
VFSDIGRFTVFGTTQRLSSDGLQQFIDALRQTKQAD FVLPEQYQFGEAFLTKAEFERLTG  
AFIVVVPVVTNFAVYWN SKAGTWN CNITGITFIDVAHDATVLSIESIDTSGSDKT NHNN  
AIMSAINAIPSELEYRIRSIPEFQINTRILEAKGSTVKIQLGANMGLKKGDEYAIIEEQT  
VGGIEDTREAGLIMITDVSQQ LSTGRVLYRSGALDANTQLKEIARRGV DLDLYFHTSGTE  
ILPGFRATASRGYFPLRPYVGVQMPVSLAFNVLT VTVIPVNAIFGAEFMMPMGR LHVAPY  
AGVGFTYAHLTEALSGYETDYL SHIGFQAGGRVGYLINRMRLFADAGIDYWLSL GWPFS  
DYGGTLGAGVSFKL\*

>SPBDM4\_v1\_50124|ID:27158487|feoB| Ferrous iron transport protein B [Uncultured spirochete bdmA 4]

MQDTRALTIALAGNP NAGKTSIFNALTGAH HKVGNYPGVTV EKREGSLEFQGWNIHIVDL  
PGTYSLTAYSLDEVVARDFVLNEKPDIIVDVLDSTNLERNLYLLLQ LIELGLPVVAALNM  
SDEAAEKGIVIDHTILSKTLGVPMVPTVGSRGEGARELLETVISTFEAHTLPRMP SYGAD  
IEAHIAALVELLKEDKDFAAAYSPRWMAIKLIEKDPDARKRIEHHARA AKIHAALAAAWH  
WITLHYGND AEIILSEQRYGYIHGA VSEAIHRKRLRGISLTERIDRFVMHP I VGLPLFFF  
IIWAIFKLT FVVG EYPVAWLEQLFGYLEAVVQHSTLPAMIQDLLINGI IHGVGGVLSFVP  
LIVILFFCISVLEDTG YIARA AFLTDHFLHTIGLHGQSF MPLMLGFGCSVP AIMATRTLK  
SPKERIATILAI PFISCGGKLPIYVLLAGTFFPKNASTVVM LMYAAGLVLSILSTFFLRR  
TVLRGESMPFVME LPPYRMPTLKGVLWHVWEKTWSYVRKAGTILAVS VLMWIITSYPKA

KGIEEFASGAQASVAEALPELSDAAITARVEVLVRQYQLEHSIAGQIGKIIIEPVIPIGF  
 NWKIGIALIPGFTAKELVVSTLGVLYGAPVDESGESPSLRQSLREAPDWSPRIALALMAF  
 ILMPPCFASLATIRAEAGNKWLAFQVAYSLVLAWLISFLVSMGLGRAAGM\*  
 >SPBDM4\_v1\_50125|ID:27158488| protein of unknown function [Uncultured spirochete bdmA 4]  
 MLLAELGPGEKFKVMRVVFGGEIGKRLADLGFISGTEGEVVRAALFRGPMQIRLGDYDLI  
 MRRHEARLVEVELLPQTAACKPTPEARTHIDLPHFRHGLSHMAHGIRSRPVSGKKPHS  
 CH\*  
 >SPBDM4\_v1\_50126|ID:27158489| Ferric uptake regulator, Fur family [Uncultured spirochete bdmA 4]  
 MNELVKFENYLRAHGQKMTRPREVILEAFLKTEGHLSDIDILREAKKIDAGIGQATVFRF  
 IRLIADAGLAREALQEDGARTFEHLADHPHHDHLLCVGCGKVIEFLSPVIEREQQKIFVQ  
 YGFAPRGHMMELLGLCPECQAKERGEH\*  
 >SPBDM4\_v1\_50127|ID:27158490| conserved protein of unknown function [Uncultured spirochete bdmA 4]  
 MEKLYTYQMIHKLAQSIAAQIEESGFNPDVIVAIGSGGFIPARILRTYLGKPI LAVGIA  
 YYDLNDKPM DYPRKVQWIEEAEKLAGKRILLVDEVDSDRVTLLEYCTKELLAYHPAALAV  
 AVLHDKHKEKRGAFPPGVSKVVFVGEALGDVWVWVYVWDAHDIDEQDRNAALERGAET\*  
 >SPBDM4\_v1\_50128|ID:27158491| Peptidase M16 domain protein [Uncultured spirochete bdmA 4]  
 MRRWNVAPKHD TIRK DAGWFDVSAGR RNKH YMKQKKILWDFILVLMMALFSPNLAVAQAS  
 TAQETGLASNVRNATLDNGLEVFVVENHAVPLVTVCVAFRGGALAQTPETAGFFHLYEH  
 MMFNGNDKYPTKDAFTAALNRMGTTSWNGATGKEYINYITVPSEKLADAVDFWAHVMN  
 PTLNYAVLENEKLVVLNEIRGYHSDPAQIASNALESRMFNTFPWRKNIDGPESNVANATV  
 AELRDMQKTYVPTNTALLVGGDTTLEQVQALAEVSFGKWARAPQPVLAEPAQGPDPGI  
 RLVTAE DQFYRGIAQVQFRWRGPDVTRQTFDTYVSDVLLFLLSSPSGPFKSEIMRKVFGL  
 YDAEYIDFIYPTARDGGNYIFSTFMLVQKPAATEEPVLQRVENLRKTVLDEFAQIARDPRA  
 YFGDEALEEAKTKLVDQNIYALESAGSFVTDLTTFWWSTAGTDYFFNYEANCKKVTWDDI  
 SALIRKYL TGEAGQGS AVVAGSAPGSSVSTSGAPSASSVPPAATLVRLRTSTFGADPRME  
 AKIGELGYTRATAQNAFWWQQR\*  
 >SPBDM4\_v1\_50129|ID:27158492| Peptidase M16 domain protein [Uncultured spirochete bdmA 4]  
 MNNFMKLHRSGAKRPSVCVHLARFALAAATFVLVVVAGAGAQTAFVRENAPTFMKTVLSNG  
 IPVYMKVQANANRVFHVSLVLNGGSLVTPPGHAGWEKIALNTMARGSQNYPYEKAASLLDR  
 TSSNIAAAVQFEYSTFGLTTLDKYRDELDDLWGDMLTAPSFSQADFDRTKEDASLALQAM  
 DQDPWSMTQKVMNQAYFKDHPYGVNPEGTEQSIGSMMAGDARQWYKDHL SADRIFVAVG  
 DFNPAELARELEALLGSIPNRLRGPVSRPADFPPTGPGSLITEAHDQSQGTIYLRGDFAA  
 PAPGKDDYFATALAARIFSDLLFSVVRDKYGA VYTPSAMIRVFSANYGSIMMYKSNAPDK  
 IKEYIDEAAGLMARGRVVSVDP TKTEGDGYMSITDAIDTYKQLYMNDYFEAVRNNAGIAS  
 LMIRSVRLTGDPADWLKDQGRIETLDSLAVRRAFD TYFMKGAFLWVA VGDQALLDKLNPR  
 AFDSMH\*  
 >SPBDM4\_v1\_50130|ID:27158493| putative M16C family peptidase [Uncultured spirochete bdmA 4]  
 MPFVLQKETSVP ELDSILRLYRHEPTGARLLSVINKDENKVFVGVTFRTPPQRSDGVAHII  
 EHSVLCGSRKY PVKEPFVELMKGSLNTFLNAMTYPDKTCYPVASTNLKDFYNLIDVY LDA  
 VFYPNLTKHTFMQEGWHYEVDPATKKLSYKGVFNEMKGA YSDPDDQHDDL CRRSLYPDT  
 PYGLDSGGDPLEIPSLTYEEFVGFHKKY YHPANSFIFFYGD DDDPEKRLAMMDDWLTSFGQ  
 ANIESLPSAQPEFSEPRHLEYRYQASEQDEPKAYTAINWALYEHGDPVLSMKASILFHIL  
 IGTPASPLRKALIESGLGEDLAGFGLSEELRKTAFSIGLKG VAPDKVGDVERLILSTLEE  
 LSRDGDSDTIAASLNTIEFALREKNTGHFPRGLAIMLDGLNDWL YDKDPIESLSFAGPL  
 EKVKKTA AENPRLFSELIDSLLLRNTHRTTVALLPSPDANREREEAEKTM LARAQAALDA  
 QKLQEIERTA EMLKVLQDTPDSPEALATIPVLSLDDIPKEAPVLPDPLDLGNGGAHGAP  
 DEARAYYHELATSGILYLDLGFDFGALESKLLPYVSL LGRFLLEMGTAE NFVQLIQRVG  
 MHTGGIRSTSVSATRWDDRKPAPWFFLRAKALPEKAAILAGILVDVLARARFDDRERVRQ  
 IVLEEKAQAEAMLVPASARIVGLRLRSR FN VADWASERLYGIEHLFFLRDLARRIEEDWP  
 SVLDDMERVRGALISRDNLVVNVTSDRATLAASADAIARIAGALPARRALAAGGAVDSDM  
 PWIDEALAACGVSDGSAPASPSGGLRPSLETLELPTQVNSVGMILPLRHLKKVAGGAYVA  
 SKYLDAVYLWGQVRVMGGAYGGYSSLDPASGLLMLLSYRDPNLERTIDVYRKVAAYLRSC  
 EVPREEIQKSIIGTIGDVDA YQLPDAKGFNALMNELTGYTQETRQSI RDQILAADIGDFH  
 RLGELIDEAARRSMIVALAAPERIGKALPALPSPIERLSVH\*

>SPBDM4\_v1\_50131|ID:27158494| conserved exported protein of unknown function [Uncultured spirochete bdmA 4]  
MISRYRLVTFVLLLMLSLGGVSGVIAQTTDTSTETDELQNDITTVNAAAEELDQTALLIRL  
SAQFQVELAVLENLSAQGYTAGQIWLALEISQQTGAGLAVSIAQAASIGGDGHGWGVLAQ  
ALGISPGSPEFLALKAQMRNRTRTMASDIAKEHVKDPDNSDRVSAEKDNSKGNNGGQNGKH  
\*

>SPBDM4\_v1\_50132|ID:27158495| putative RNA polymerase sigma-H factor [Uncultured spirochete bdmA 4]  
MLLGMQGHADTLGHAEPDSMKEAAERNREDSIIARVLDGDIDSYRFLVNKYSARVLAFCR  
MRMRSEEDAQDASQEVFVRAYRSLASFKRGEFSAWLFAIAANNVRTHIRLFASRKQREV  
AFVRRQVVTNPPDDPAGEAERACEFQALREAVSSLPVDLRKPVELYFAQLSVEETAKVLR  
LGQEA VKSRLFRARKQLREALAENVQPKRPPGGISL\*

>SPBDM4\_v1\_50133|ID:27158496| protein of unknown function [Uncultured spirochete bdmA 4]  
MMNCTEARAFVDAWERGERGMMTSSLDEFMRHLADCETCAHEFRALLPFIERDANTEANI  
AADSGVGSARRSGTLGSPSEFADGVMKAIGGEKRPSHIIRSRPALVAAAAAIFILGLSL  
GLYFGTRTKDTVSVKFLVYAPEASTVELAGDFTSWNPGTYVLKKASVDGMWEVLVPLKKG  
RVYVYNFVIDGDRWISDPKAAVQVDDGFGGSSSLLRL\*

>SPBDM4\_v1\_50134|ID:27158497| exported protein of unknown function [Uncultured spirochete bdmA 4]  
MEKTRPKVFTPKFMRLFSLLLFSLAPSVLFAQTVAAWLAKPSNVAVYGTIAPEVNTMVQQ  
LEKLGLSDSILVVRLEEGAQKQVNPEILVASLRVDIQRVVRLAAILRANGIFPSNRNTAS  
SAIEQMLIFIRAGL TEAEVQKALEEGVAKSGAKQKATARALAALSVVTSAKAQFGLGEED  
RLRLASVLIASDLDEDGFGSILVSVEEFTSAGHSAAEAVSKALEKVSLSGKKNQGDISQN  
AEGQSDSGKSQSGKSESGGQGNQGGHGKK\*

>SPBDM4\_v1\_50135|ID:27158498| exported protein of unknown function [Uncultured spirochete bdmA 4]  
MRTSRKAITLLMVGAMFVA VTAGAF AQFGQTGGPGATTPGYGYNYGYWFGMQNEAPGF  
GPYGHGQQRGQGSMAQPGFMGPQGAQRPMQPGSMGPTGMRGQSGFGAFSYYQYQKLS  
AEDKAKVEKIVQDAASQILPLQNEVRSERLLNLLWSASPKAKVDESISKISDLQKQI  
QEIRADSIIEVNKIFQANQ\*

>SPBDM4\_v1\_50136|ID:27158499| exported protein of unknown function [Uncultured spirochete bdmA 4]  
MKSNAKTLALLFLIAGVAFVSAQGGPGMGMGNGQVMGPGAVREWFRSLNLTDDELAKLE  
KILDAREIELAKAQNEIRIYQTQVANMLLDPNPDMNSIEDAISKSLGYEKTVRRIQIERQ  
VAIRKIFGEERWQSILFLVREARMSEKMGQFSNSFSAKGFSSQEADRYGRLLIILRRIM\*

>SPBDM4\_v1\_50137|ID:27158500| putative RNA polymerase sigma-H factor [Uncultured spirochete bdmA 4]  
MISDEILVRTMSAEKKESGPLTPATPKDASKSAATGDDPLDLELANASRGDKGAFERLM  
WRWWDRIRGYCAAFVAFDPELAEAAQESLIRIYKALPRWRKESPLGGYLYGICRTTSAD  
VMRTHARHHARNVQVEEFESLSLESPHASGEANVLRQEANQLLAIAMQKLEPVDRSMLYL  
HEVEGKGLSELGAMYDLPLGTVKSRLFRARDKLGMLLREMGYELS\*

>SPBDM4\_v1\_50138|ID:27158501| protein of unknown function [Uncultured spirochete bdmA 4]  
MSSAEKKTIDLKAALKDVAMTSAPSPDFARVYQEAQRPRKVRRFALSAALMALAAAAS  
FWVGIYWHSQSSRDVALIESWSSSSSSAPSAVSIGTSNGEQSQVVLASSQNTAVNLFVQD  
LWESSSSGGL\*

>SPBDM4\_v1\_50139|ID:27158502|proS| Proline--tRNA ligase [Uncultured spirochete bdmA 4]  
MAEKITPREVDYSQWYIDIILNAKLADYSPVKGTMVIRPRGYAIWEKIRDEFDRRFKETG  
HENAYFPLLIPMSFLEKEAEHVEGFAPELAVVTYGGGEKLEEPYCIRPTSETIIWAMYRN  
WIQSWRDLPLINQWANVVRWEKRTRLFLRTSEFLWQEGHTAHETEKEAREETLRMLEVY  
RDVTERYLA VPV VAGMKSESEK FAGAVDTYTIEAMMQDKKALQAGTSHFLGQNFAHAFDV  
QFQNRQGELDYVWATSWGVSTRLVGA VIMTHSDDKGLVLPPTLSPEDAVIPIYRNDTKA  
AVSAYA EKLQAGLKAAGFKTVLDADDSSSPGWKFAEWELRGTPVRIEIGPRDMQSNQVVM  
VRRDTGEKLSVPVGEV PARL KELQTLIQHSLFERAKAFRDENTVPVSSLDELISFFGVET  
AGTTGAKGGFAEALWCGSAECEASLKEKTKATLRCLPLGRQEHVEGKCAICGAPARYRAI  
FARNY\*

>SPBDM4\_v1\_50140|ID:27158503| membrane protein of unknown function [Uncultured spirochete bdmA 4]  
VTTRNFRLTYWILSSLVMLLGTIVLATRIGTDKRLPFFLADTRLYTEYFFFGKPVGIQ  
LAAALEMCVLALGVSAVLMVVLFTFQKTVSAEVYLIALWVFLVDVETLRLMLVIAQRST  
SIGSLVSLTRVYGGFRFTGLILLFISGLYAVGIGHERPQTGALLALLFGTMLAMLMPISI  
DRFQSSFMLQAGYRNITMIVTTS LIVINCVDYFVAARLKEDMSYAYAGIGLTAASAWVW

LWDARSLVGGMGVALFFVLCVLVATERLHKIYIWK\*

>SPBDM4\_v1\_50141|ID:27158504| Phosphatidate cytidyltransferase [Uncultured spirochete bdmA 4]  
 VRIDHVVPRAEPLHASHNRRLHFRSPAEDLRIEVTRKSLHLLILFCIPLDISPTLPV  
 CLLAGLLVYSVSELLRHGIVPVIAPLTERAARRRDGNRFVLGPVTLALGAMLALLIFD  
 PLQAKIAILALGIGDSFSSLIGKSFGRIPMPLSDGKSVEGSLFCFATVLLAVFLLTGRFI  
 PACIIALTTALVEFWPTKDWDNVLIPLAAGVVASLVI\*

>SPBDM4\_v1\_50142|ID:27158505| protein of unknown function [Uncultured spirochete bdmA 4]  
 MQGFSRHLDAQVLSGRTKVKAADVRCVFEGLCARYYVIDSHIQPLSVLSLTCGGLLC\*

>SPBDM4\_v1\_50143|ID:27158506| Major facilitator superfamily MFS\_1 [Uncultured spirochete bdmA 4]  
 MRPIQRYFNAYRGLPSSLYVLFGATVINSVGMFVFPFLTLYLTGRLGMSQKEAGLFMIV  
 NFA YIPANFIGGKIADTFGRKKLMVTAQVLSGLCYPCGFPGIGGNVRWFLLASVFFDGL  
 TDPARTAMMTDLTTPETRRPAFSLTYLGHNLGFAVGMMIAGFLFEKATSWLFWGNAIAIL  
 AAISLVALKVPETKPTNEQVEASFGSGREDEGHRGNIVQALLSRPYLIIFTVLTGLYGFV  
 YAQHRFILPLQTKEFFGMRGSVIYGTLMTLNATMVIVLSTPIMTLTQHWKPINAVAGL  
 LFGLGFLIGLAPSVPMLYITTAIWTLGEIVNATNEGTYVANHTPISHRARFQAMLPLLG  
 GFGWSISPLVGAFTDRFGLRTAWPFLGGIAVIASIAIWCLGIIERRPTRKENAATD\*

>SPBDM4\_v1\_50144|ID:27158507|gtaB| UTP--glucose-1-phosphate uridylyltransferase [Uncultured spirochete bdmA 4]  
 MKGIIVAAGYGTRFLPVTKTVPKELLPIGVTPSIA YIAQEFVDSGIADIIIITSRRKKAL  
 EDYFDREIELEELFKREGRGDRLEKIRPFPARVSFVRQAEMKGTGHALMQVSHLLGGEP  
 VVA YPDDIVLGPPLARQLIDVYERTAKCVLATIFEPGDVSRYGVDPAADGMGVRGFVE  
 KPAVGAEPSHEVSIGRYLYTPEFFAWLEEGWTHHGSGEY YHTYALDRMIEAGKVA FARVE  
 GRRLDTGEPAGYFEAQLLNALGDPALKKVL AQFVAEHGPELE\*

>SPBDM4\_v1\_50145|ID:27158508| Betaine-aldehyde dehydrogenase [Uncultured spirochete bdmA 4]  
 MAKMIIGGKRVDSSDKAVIEVTNPATGEVIDTVPAA TKTDVDRAVHEAIVGQKAWARVPL  
 HKRGDVLNTFVDLALAHKEELARILSMETGKPIIEARIEIDNIPTLFRGFVEKAKHLYGS  
 VIPNGTEPGQEHTIQFTVREPVG VVACIIPFNPCDLFDQKVAPSLIMGNA AIVKPSTDN  
 PLTLIRLCELLMEAGVPDGAIEIVTGRGSTVGSWLC SHPDLGLISLTGSTSVGIETAGVA  
 AKHLTPCTLELGGNDAFILEDADVDLAVEEVMVGRMYNTGQVCCASKRFIVHNSRKEEF  
 TKKLVDRLGTLVQGDPRDERTTIGCLISEKAAIGVEEQVNKTVAQGARILLGGKRRGAFY  
 DPTVLADVRPEMDVAKDMEIFGPVVP IIGFETTEEAVKIANASVFGLSGCVFSRNINEAM  
 KVASYLECGGVINGSSFFRSCMPFGGYKMSGIGNEGIMCSLDEVTTETKTIVLKNVLT\*

>SPBDM4\_v1\_50146|ID:27158509| conserved protein of unknown function [Uncultured spirochete bdmA 4]  
 MLQANVGSSIAADAREAGKEAATAATVKGAPLAFVYSSCDYDQSKLLEGAAEILPDAALV  
 GCTS YTGVLTPSGFMTGPKGYVAVMAFRDDDVT LGIAGEAKKGDARETGRRLARAAMTAA  
 KKDVPPAYFYMVAAAPGEEESYLKGVEDVIGRVPFFGGSAADNSVEGKWKLLFGKDAECKA  
 FSEGLILVFFYTKKAVGTCYTGEYAETR TAGIITKVEGKRRLVEIDGEPALKKYASWRGL  
 DPEKLKGLNLLGETICHPLGVKDRLGDLVAIRHPMVGNEDYSMNIGSDIAQGTAVVLMEG  
 NAESLIAS TGAALRKVDERLGSKPGAYLLVHCGGRRGGIGGRMDEAYREIKRAAGDV PFI  
 GVFTFGEYGYEDWGANTCGGLMLSFAGFEK\*

>SPBDM4\_v1\_50147|ID:27158510| putative HTH-type transcriptional activator HxlR [Uncultured spirochete bdmA 4]  
 MPINLRDDLNDTIKAGGLHCEKELTMSIISGKYKV VILWHLGHDGALRYGELRKLKFDIS  
 NRILTKQLREMEQDYVVSRTIIAESRLKVEYSLTDIGRSLLPVDSIYEWGREHLAFYIE  
 KEKIETERGREGPRSLRIASAAKGTKGDVL\*

>SPBDM4\_v1\_50148|ID:27158511| protein of unknown function [Uncultured spirochete bdmA 4]  
 MHAPHDKREALSKVGRVLKGPPIA AFVYGFNETGANAKPISEVTFD\*

>SPBDM4\_v1\_50149|ID:27158512| conserved membrane protein of unknown function [Uncultured spirochete bdmA 4]  
 MTATPTSVTVGTTLGALAALLFLIADLYVILHMVHTIFAPKSKWPWLENMGKKWHPIHYF  
 GNIALVIVMIVHAIIMAPYTGFWNWLLFALIVWMGFAGIMIRFSHISPKAKASLSRFHAR  
 WYMILIVLVLLVVAQLVSLQTFPYVLG\*

>SPBDM4\_v1\_50150|ID:27158513| conserved exported protein of unknown function [Uncultured spirochete bdmA 4]  
 MNYSIARISSGRVRSFLSSLISFVLLSLGACSTAGPNSFIISSTAADLPPPRYPDTRFM  
 VLSDTHLYDTS LGTIGEAWDAYMAEDRKLLPDSAETLSVVM DRIKSARPDFVLITGDLTK

DGEKQCHEQFAAALGELNKEGIKTYVLPGNHDINNPAARFLPSGGTESIPTVNPEEFAR  
IYSASGYGEALYRDPSSLSYVAEPTPGLWILALDSAKYENNAGKKWSETSGAIRESTYQW  
IEARLAEASQKGIAVIAAEHHPIMEHIDGMKDKYPDYILDDNWRLASLLASYNVRLLFSG  
HFHASSIVMHRWKEDAPAQLRGKYIVDIETGSLVTWPCSYRSVSLSSQDDTDTISTARVD  
QLSSYAAEGRSFDVEGKKVIERGIGNIASATMKRYHVAQRDIDVVTPEIVAAMMAHYAGN  
AHFEGEDMLSTKGLGLMGRAVVASYNKFVHGLWKVKAPPNVELMEDNLTIRADGSWMTI  
PSVEGF\*

>SPBDM4\_v1\_50151|ID:27158514| protein of unknown function [Uncultured spirochete bdmA 4]  
MLRITFINVGYGDSILVEELKSGRRIFSMMLVDGGNPYDQRYKHAYDSHAGQTPAWRYLQG  
RGIERLDLVVLTHFHLDHIGGIPDVVKTFFPCGDLWSNYVFSGRPPAIDVGKKRRYRPESR  
MMVHSLRLLAELSDFAGHQKNEIHEMRRNEFNPLTSELVDRFGVDEAIYARMGDLVRD  
ICAKGGARGATVGS GDCAEDVEAQLFGLDKILNASCAALRLSYRGRSVLLAADLPATYW  
YPILDAGHTIGADILKFSHHGQKDGVS KRFAAVNPSNVVFCVSEDNPFHCPNPSVFSFF  
DATTRFDATGIVPLPPAWKPHPAHSAVVFEIGDDSSIRLMLQ\*

>SPBDM4\_v1\_50152|ID:27158515| putative Catabolite control protein A [Uncultured spirochete bdmA 4]  
MTIDHIAARSGFSKATVSRVINHEGSVKPSTA AKIEQVIQELGYTPNTIASALSGGKSRT  
IGVLLPDIITEYYSALLMGIDTV AEEKNYNILLKTRNSRKVLMDLA QSNRVDAFIIRNNG  
LQPIDHDFLVTLRRKGIPFLFIGKPMEEHC PAILIDNVGGARQMAHHYAEHGFRRILFIA  
GPEENLDSNDRIYGFRLGLSEK GIEPEQFDV VHGDFAKNSGHEIAREMLEDKKYDAIFAA  
NDHMALGAIVYCRSKGIRVPEDLA VTGFDDTFFAQFLLPSLTTVQQPMYEIGTQAMESII  
QLIERPVSHEHRILPTRLQVRQSCGCCQENVDI\*

>SPBDM4\_v1\_50153|ID:27158516| conserved exported protein of unknown function [Uncultured spirochete bdmA 4]  
MKKFLALLCALLATVSVFAKGAQDDTVVVYAALDEKTANELAAAFKEATGLNAEIALQIE  
EAGTIAARIKAESTHPRADVFIGGNSNFHTDLASGGYLEKYTSPVVKEAKIDSSFMDDPDG  
YWTGWYLGALCLIYNNRLYEQVKPLGLNPPSTWDDLNPVYKNQVIASNPATTGGAYLM  
LCAQIFRLGSESAGFDYIRKLNPNVAQYTKGANGSIPLVAQGEAMVGFAGWHDALKQKMQ  
GNLPITVVPKDTGFEIGCGSILKGAPHADA AKKFIDFLLSPQAGKINAKNGFRYPVRAD  
VEMPAGVPPFDQLKLAPWDLKAAA VNVDRWKKQWSEITGK\*

>SPBDM4\_v1\_50154|ID:27158517| Binding-protein-dependent transport systems inner membrane component  
[Uncultured spirochete bdmA 4]  
MKHREREWPLSLLIFFIVFCLLAFVVYPIVEVFLYPKANDFVSIFHNARYMRTALNSLMM  
LVLSTLSATFIGFIFAYTVTRTDV PGRKAFKFITLLPLFSPPFMVFSYIMMFGRNGLIT  
KGILGLDVNIFGWHGLWLAQTIAFFPVAFLVM EGVLQSSIPMLEYAGRNLGANGFTLFR T  
VTFPLARPGVAGAALLVAIQVLADFGNPIMISGGFV LATEAWMRVEGWADIAGAAVLSI  
MLLVPSLV LFFVQRYWVGRKSYVTVTGKMAQVNIQKTGKVMKWVLFVCAAVSLLVLLVY  
VGLIVGAFVNGWGYDWTFTTRYITEIATR SKELVHLSYS AIAGFSSALFSMTAAFLVSR  
KKFPGRRFVDFTCMLPAALPGIFLGIGYSIGFTRPPVDLYGTATIILSMIFWNISTGYQ  
TGIGAFQQISPSFSEAA SNLGAGSLRIFREIEIPLIKGPFSSFIMS FIRAITTLSVIVF  
LSTSKNAVATFSIMNLVSDGFY GKAAALTCVLLVISFGTIGLAKLIMGKQVQFFKV\*

>SPBDM4\_v1\_50155|ID:27158518|fbpC| ferric transporter subunit ; ATP-binding component of ABC transporter;  
CP4-6 prophage [Uncultured spirochete bdmA 4]  
MAQAHVIIREVSKCFGKTKVLDTISLEIEKGSFTTLLGPSGCGKTTLLRTIAGFYDVEQG  
EIFIGEKKVNDVPSHLRNAVMVFQDYALFPHMNIRENITYGLRIRKMPQDEIEKKLETTA  
GYLDIKNLLDRTPGEISGGQQQRVALARALVMEPEVLLLDEPLSNLDAKLRVSIRAE LRQ  
LQQLKITTIIYVTHDQAEALAMSDTIAIMKGGKIMQVGS PSDVYYRPDNAFVASFVGTVN  
FIDGTVRSVSDEGVEVETGGTTITVRERQPAGKPA AHPLPGEKITLSIRPESIRIVEHP  
APAAAFRDENVFRGTIKDYIFEGSSIRYWG EALGKELLIDVFNPVENALHTGDVWFRIDP  
ERIHVIPQSIT\*

>SPBDM4\_v1\_50156|ID:27158519| putative glutamine-fructose-6-phosphate transaminase [isomerizing]  
(Glucosamine--fructose-6-phosphate aminotransferase) [Uncultured spirochete bdmA 4]  
MVTMCGIVSLAYKDENPSMGKEAEALLKRLEYRGYDSTGASFIGDDKRISLRKQVGAPSK  
VCPLLHIDTFSGQRFIGQVRWATYGSVTDINSQPHHVSCKIELVGAHNGNISNTDTLKTW  
LSARGHAVVSDNDGEIIVHLIEEHYAAAQSLASSELAYLRKAYANAGLAEGVPDGVLRMI  
EAIRKAESLTEGSYAAAADPELPGVFAIKSGSSLYAGVGS DSHGDFIVLSSDLTSVLSK

TRALIPLSEGEIWFTEENQYLVSFLQGPFFSHPRCLKRSKLSIKDTQLSPEYQHMEQEI  
SSCPNNITQVLRYYFRDPSLEPLSELFEERKDDCKETSIIASLSERFGNDALLAGMHDV  
FNSSAWNEIEARVQNAGAAHFVSRNFISDETELLKELAALDPQARDKLLMDKVMVWRKR  
RAVLRYTGELKNAIHEAARS GGRIYL VASGTSYHAALTAAYFFNEMAHIPVYPCNPGTFR  
SMYFNCLGANDLIIGISQSGETKDLVDIFQDVKKANASVRLVSIVNNENSRI PQELSDFY  
LPLLCGPEIAVAATKSFTSQVAILYLIAASFSMSEQKIRENLLKAKDLMTETIETRMGDI  
ETVAAHLFAASSIHILGTGLIGLAREGALKIREVVLNHTEGYDAAEFKHGPNLILGRNTI  
LSLADLAKLAGKEPVSGITNELFEKLTNNYPLVFICPPEERDRRITISQIHTHKIRGADI  
VLIAEPQQELALAVEGKPMGMEKYWSKYIPLPQSGEPCLFVFSATIVLQYLYRMSVRKM  
EWLDSLGIQNHGVHPDAPKNVSKSITVD\*

>SPBDM4\_v1\_50157|ID:27158520| putative Acyl-ACP thioesterase [Uncultured spirochete bdmA 4]  
MIKPLEIQYVIRGYDCGYGGPLKPFALANFFQEAAGAHASQLGIGMEDMWASGLTWMLSR  
IDIRIDSMPQAGQTVVARTWPVGTRKLFALRCLELVDGHGTKYAGAMYEYIVVDMKTRRV  
MRPERTLPLDLSTDYPWPFDDLAPGIDDPFKALSQHIASEGGATEGIPADEKTDNVVAG  
GFRQSFIESRTRHIDQNGHVNNAHFINWLCDAAPLREGQRFSRIKVDVHEIMKGENVR  
AWAGELASSPEDSEKLTDSVTEYPRETAWLTALTVERSLAARGSLKIAPAED\*

>SPBDM4\_v1\_50158|ID:27158521|tpx| lipid hydroperoxide peroxidase [Uncultured spirochete bdmA 4]  
MATITFKGNPVHTIGTLPQKGTKTPDFKLTGADLGDVGLATYAGKVKILNIVPSLDTGVC  
AASARAFNKAAASLGDVVILTISRDLPFAQKRFCFAEGIDKVVTLSELDRDFGKAYGVE  
MISGPLAGLLSRAVVVLDRGNTVTTYTQQVPEISQEPDYESALAAKKAL\*

>SPBDM4\_v1\_50159|ID:27158522| putative UspA domain-containing protein [Uncultured spirochete bdmA 4]  
VYKKIMVPLDGSSAAETALPWTIYLANAFQAGIVLFHAIEKNPPEQIHGDAHLANMEEAS  
AYLESIKNSLHNVFHFHFKGDISTHVHLEETDVAASIAMHMKELRPDLVVMCSHGRSNFTQ  
AFIGSLATKVI GLGEVPVFL VKSHESEKSTGTDAVGPSISNVVVALDNASIHDKAIRYAE  
EFVQETGARLVLFSAVPRFGLKKGKGGWGLMAPATSSALLDIEEEKMRQHLDEHQKSLA  
ARGVSSSNVVRGDPARKIAQETKKLEPCLIVLGTHTGRSGMGAFWKGSVAAKVVSLT DSP  
ILLVPLHE\*

>SPBDM4\_v1\_50160|ID:27158523|mntH| manganese/divalent cation transporter [Uncultured spirochete bdmA 4]  
MSQKTNQKSTGVPRAPHEPSRSDSKTIESATEVLEGTSKKG FVARILPFMGPAFIASVAY  
VDPGNFATNISGGAQFGYLLLWVIVASNL MAMLIQALS AKLGIATGKNLAEHCRLRYRRG  
VVIGLWILMELVAMATDLAEFLGAAVGFNLLFGIPLWAAAILTGVTTFIILGLERYGFRS  
LEAVITGFVS VIAISYIIIFL GKPDWGQVAHHA VIPEFKGQSSILAAGILGATVMPHA  
IYLHSSLMQNRVVVHEPALLKRLFRYEIIDVVVAMGVASLVNGAMLMSAATFHAQGMTQ  
VGTLEEAYRTLEPLLGAASWVFAISLLFSGLSSASVGT MAGQIIMQGMNFEIPVWLR  
IITMVPSIVIALGVDPTKALVISQVLLSFGLPFAIPLISFTSDK KLMGVLVNRKSTKI  
LAICVAGIILALNVYLLYVTFTGG\*

>SPBDM4\_v1\_50161|ID:27158524| conserved exported protein of unknown function [Uncultured spirochete bdmA 4]  
MAKAVFSVALAFALSAVPGFSQSWPEGKTS DRFDTGNGELEIVFLGHGSLILVYKGSYIY  
IDPVSQYGD FSKYPKADLILVTHEHGDHLDPKAIAALS KNGTRILLPEASRKKLGAGEAL  
QHGRPLDVAGVTLLAVAAYNVTSGRMIYHPRDRLDNGYVITADSLRVYVAGDTEPIPEMA  
NLGHVDIAFLPMNQPYTMTPEQAAAAARVIKPKILYPYHFGSTDTGALTKLLANDKKIEV  
RIRNLQ\*

>SPBDM4\_v1\_50162|ID:27158525| conserved protein of unknown function [Uncultured spirochete bdmA 4]  
MDKITTGLFNDGYMPIIDGVTLTVRNYAYWLRK KLGPTYVITPFV PNYKDTDPFPVIRFL  
SLPTVVRPPYRIGFPDFDIRLRSVLKNRDFDIVHAHSPFAAGKLALRVARGKHVPIIATF  
HSKYRDDLTRAIKAIIVHDQIKRIVEFY NVVDHVWVPQESVAQTLREYGYKGPYDVVEN  
GIDFEPLDDIAPYRTSGAEHLGLPEEYL VGLFVGQHILEKNLELLVRS LPSIMDALPNFR  
MV FVGKGYAKESLIDLARQLGISNKVIFHEVVYDRELLKAIYARADVFLFPSLYDTSGLV  
VREAAAMKTPSILIQGSDAAV FVHDGENGFLSAEDTVSYAQT VVSALS DKEALAEIADHA  
QKTLCRTWEDVATEVAERYRSILNRWA\*

>SPBDM4\_v1\_50163|ID:27158526| Deoxynucleoside kinase [Uncultured spirochete bdmA 4]  
MSRKYVVVAGNIGAGKSTLVSLLAEHLGFIA YFEPVLENPFLKDFYADMRRWALQSQLFF  
LSHRATMHQKLSADTHSVVQDRSIYEDA EVFAKNLYVQGNMEKREWL VYQDL YRTLTEIL  
PHPSLVIYIRASVPTLQTRIAQRGRDFESAIPDAYLEGLNVLYEEWISSFTMAPVLTIPG

DSLDFVAESRDLQVILRTVTKRLEDNQPYLFPYEM\*

>SPBDM4\_v1\_50164|ID:27158527| conserved protein of unknown function [Uncultured spirochete bdmA 4]  
MWQLHNRRAFWDTSAGQQILTLDLIFRKISDAQRIFVGRAAQRGVELSCPPDCGACCHGF  
MPDVLPVEADYIAFFLLINQNNPGDGPEGHFSLSPSTPASPCPFYAADRPGANCRIY  
EARPLICRLEFGSGTKTKNGGTA YRLCRHMPTPRGFPGRSPTQEALQRAIGTLPPLMSDF  
SIGILAI DPSRASERKPLVEALPPALARISATLHYCPEEPNAA\*

>SPBDM4\_v1\_50165|ID:27158528| protein of unknown function [Uncultured spirochete bdmA 4]  
LILNKYGGKGYHAVRQILPFFQKNSRASAGVLHVAIAQQAGVLGYIGRSTNSYVRFNLS\*

>SPBDM4\_v1\_50166|ID:27158529| exported protein of unknown function [Uncultured spirochete bdmA 4]  
MKRFAVFAFVFIAAIALLGAQESQTPATFYADAAQQTKEALDASRLQLQSKGQWSKAWNLL  
AALDPENKDG YVLAEKIRLALEGNVANGMLVSFGFVDLAEGQNLDEMRTNPPEKQTIADF  
NPVDLADALEKSGEAVPPVLSYELGNLYTVNHEYGDNWILESQAVQQKAVENYDRALAY  
DTYTEKSLSNQAELLLNLQQYDAVETVLRKAIAAYPENPNFSVSLASALNDQGGKFDQVYP  
IVDEVLANPDASDATYNAFVEGIKAGLNAGDVQKTDAYVEAMIARFPDEYVPMLIQHLIE  
VRMGTPKANAVADDVTAKFNVDPNVVRSLISTWLNVDQDPQSGFDYLNRSLEKYTNDDMA  
VGTALFYRALMYAQTAAQSVDDLKAMADIEEAEKRFGTVYDKDNQVFLVISQLKDEWNQF  
LQQQSAPDASAVSGDQSQQPAETPEAGSSQTDQTPAETPEASPEASSDATSGATE\*

>SPBDM4\_v1\_50167|ID:27158530| N-acetylglucosamine-6-phosphate deacetylase [Uncultured spirochete bdmA 4]  
MGS AFCIHNATVIAGYARMDRS AVLVEGNLIADIFSERRFAQKTFAPDVELIDAEGAYLT  
PGLIDTHIHGIGGYGTEDMSADSILGMSKMLPAWGVTSFVPTIYPMPEEDMLRAVRAIVS  
AMGREGAEIIGVHMEGPFISPAQLGVQRVEFVRPVDLGLMQRLWDASEGHIVSMTVAPE  
LKGMRELALFCNRLGIVLQAGHTDASYENMIEGMQAGIRHSTHMFNAMSRLHHRNPNAV  
AVLIQPDLSCEIADGLHVHPDLIRLLFRDKPEGNIVLVTDSLKPTKQATDAPMFANEE  
VYLTNNLFFRASDGVIAGSSLTMIEGVRNLISFGVPLESAVKMASANPARIFGLRRRGM  
SPGFQADLLLANNKFEAQMTIIDGIIKYRRSAR\*

>SPBDM4\_v1\_50168|ID:27158531|nagB| glucosamine-6-phosphate deaminase [Uncultured spirochete bdmA 4]  
MRVIVQNNYDFVSRWAAHHVVQRINEHQNTPFVLGLPTGSTPLGMYNELIRLNKAGVVS  
FKNAVTFNMDEYVGLPSKDESYHYFMWDNLFSHIDIKENVHIPDGMAPDL DKECRRYE  
EAIKQAGGIDLFVGGVGADGHIAFNEPGSSLSRTRIKLTRDITKLANARFFDGDPEKVP  
SHALTVGMGTIMDAREVLIMVSGIEKARALRHAVEMGVNHMWTISCLQLHPKAILVCDDD  
ATSELRVGT VRYFKEIEAPNL TNWD\*

>SPBDM4\_v1\_50169|ID:27158532| Methylated-DNA-(Protein)-cysteine S-methyltransferase DNA binding (modular protein) [Uncultured spirochete bdmA 4]  
MGTLYRKKVFRVRGPRGRRKPSGVSVRPPAAC YTTVM PSEQTLRIIRAIRAVPPGKVASY  
GQIAVIAGHLRGAGGARDVVRILVSMSEKENLPWWRIVRKDG TIALSPGDGAELQHALLV  
REKVRFDASGKVVAACFWGGRSET\*

>SPBDM4\_v1\_50170|ID:27158533|yjjK| fused putative transporter subunits of ABC superfamily: ATP-binding components [Uncultured spirochete bdmA 4]  
MPTTDDKKIISMYRLSKRYGTKQVLKDISLSYFYGAKIGVIGLNGSGKSSLLKIMAGLD  
TEFSGEVACAPGYTIGFLPQEPHLEPGKTVREVVAEGVQEVMDLHAEFERVNEAFGDPDA  
DFDALAVKQAEIQEKMDALEAWDIDARLD FSMDVLRCPADQVVD T LSGGERRRVALCRL  
LLQKPDILLLDEPTNHLDAETIAWLEQYLRLYQGT VIA VTHDRYFLENVAGWILELDRGE  
GIPWKGNYSWLEQKRQRLEQEEKGESMRARTLGRELEWIAMSPKGRHAKSKARIDRYER  
LLAEDTKEKIRDVRLVIPPGR LGDIVIEAVGLFKAFGDTVLFEDIDFSVPPGAI VGIIG  
PNGAGKTLLNMIAGVEKPD SGSLRLGDTVKLAYADQMRARLAPDKTVWETLSDGHDMIS  
LGG RTEVNSRAYCAWFNFTGADQQKKV GILSGGERNRLNLALMIKEGANVLLLDEPTNDL  
DVNTLRAL EALDDFAGAAMV VSHDRWFLDRVCTHILAFEGDSEVIWYDGNWSEFAEWRR  
QRLGIDADRPHRIVYRKLER\*

>SPBDM4\_v1\_50171|ID:27158534| conserved membrane protein of unknown function [Uncultured spirochete bdmA 4]  
MKRDIKGIMAMVATALCWSLGGFLIKLVDWHPVTIAGARSLVAALFILAVVRRPKLNFSK  
NQIIAAVAYSFTMLLFVYANKHTTSANAILLQY GAVPYVMLLSGIILGERPLPEQIGALV  
AIVVGMGLFFADSLSLGHLVGDIAAVLSGMTFAIHILFMRRQKAGSPIESLLLGHGMTAV  
VALFISLFLPAPVMNAKSIAAIFGLGIVQIGFAAVFFSFAIVRISAIQSSLIAIIEPALN

PVWVFLAIGEKTGRAVLGGVVIIVAAVAVSSVFSVSREARVSGKEAAA\*

>SPBDM4\_v1\_50172|ID:27158535| conserved membrane protein of unknown function [Uncultured spirochete bdmA 4]

MKQSFLSVTILLILITDPLGKIPLFIASLKNVPRRRLVILRECLIAFLVLVGFLFFGE  
VFLSALGLSDDILRISGGVILFLIALNMIFPGTGGKLVEDEIEGEPFIVPVAIPLIAGPS  
AITYVMLLMKSDPSRSLEWVGAIFAILVTMASFFMMSDKLKEWLGPRALSAIERLMGLVL  
TAIAIEMLLDGLSQYLGRQ\*

>SPBDM4\_v1\_50173|ID:27158536| putative Histidine kinase [Uncultured spirochete bdmA 4]

MHKRNAIQRNFLDHVRQLRTTEQIGFFIVFLLLVGFVTVGAHFQWQSILRDKKSYIELIG  
QSKIGQLESWYDSQLSEAKELPASPVFIDIVAQAIEKPSSQNARIDDYLRPILRSYNYA  
DSAVLTPDFHVLVSLTQLAESNCPEVCEEISRKDSLAPFFTTLHLTSPYGKPGFHLVIPL  
VKDRQKAPFA YVVQTFAGDYL YPMLARWPGNEKTGETLLLERTDDMVQVLNPLKLVNIS  
AFSLQVSVSDKNAVEARAGLGQTGVMVVGKDYRGKRVLA VVNRVPELGTILSKMDYAETM  
SSWIPTLVIIIIVFFVFAFAILAGSYVLFSTRALSASRSRLELLQRTERSEALLSAILEH  
VDAPVVIIDKSSAIQFSNRAFKEHFNDILPNDLKALQPSLDKDAGVLSHKLELSDVRGKA  
LQLYVMPIHILLEKQESLFGYVMRDVTELESALEQVQRLNRDLAQKVEAQTKRILEANEE  
LRTIASAISHNLATPLRAVESFSELLETKEYDQLDAETSGYVLRIRKASANMATLTDDLM  
TFLSLDSIVLAHDEFNFSLAAQDITSDIIRSPKRRYQITIMPSLKVHGDGALLKTALRN  
VIENAFQHCSNTVASIEIGKYGESGIFVKDNGIGMTSDEINSILKPLSKTETENYVPLG  
SVGLTITKKIVELHGGSLIESELGKGTTRIRFKF\*

>SPBDM4\_v1\_50174|ID:27158537| protein of unknown function [Uncultured spirochete bdmA 4]

MCADSDEANEKEKDNKESYLLSSPQLPDMVEEIALYCIPFVHFGILPVLDPADP\*

>SPBDM4\_v1\_50175|ID:27158538|tkl| Transketolase [Uncultured spirochete bdmA 4]

MNIPALQSIASVRSLTIDAVQKANSNGHPGMPMGAAELAAFLYGVELKYNPKDLKWLNRD  
RFVLSAGHGSMFLYSILHMAGFDVSLDDIKAFRQVGSKCPGHPEYGVTPGVETTTGPLGQ  
GLANAVGMAIAERKVA AHFNRPQGEIIDHSIFV VAGDGFMEGVASEACSLAGYLGLGNL  
IVYYDSNHISIDGSTNIAFTEDVGKRFEAYGWQVLRGSMYNFEELAALTARAKADRTRPS  
LIILESIIGKGAPSKQGTSGVHGSPLGEEEARAKEGLGIPLEAPFWVAPEAYAYFEAHR  
KTLDQEYQAWQARFEAWKKANPELARELSTWLSGKATRELDLPAFKVGEKVATRNASGKC  
LGAVAGAWPNLIGGSADLTSPNVTQLPPNADGTPLVLTKENPAGRYIHFGVREHGMAAIA  
NGIALYGGRLPFVATFLVFADYLRPALRLSALMKVPVIYVLTHDSIYIGEDGPTHQPVE  
LASLRAIPGLKVL RPADAETAVAWRIAMERLDGPTVLVFTRQNLPVLEKADPDWPYTMA  
LGAYVVQNPARPPEVTLV ASGSEVSLAIAAADIVRAQRPKTAIRVSVADRQAFYAAPAP  
VRDAILSPGSLVFVAEAGIAQGWERIAPSENIFSIERFGESGPGDKVAEHLGFTAQAFQA  
MVLAKFA\*

>SPBDM4\_v1\_50176|ID:27158539|uvrC| UvrABC system protein C [Uncultured spirochete bdmA 4]

MDIMKRESTEAEAEERRSLKTLIKEAPQSPGVYLMRDETGEIIVGKAKSLKNRLSSYFS  
GKKDIKTRHLVSRIHNIEWVLA AHEYEALLENFIKEHTPRYNINLKDGTKYTPSIRITS  
EEFPRVFRTRRIINDGSEYFGPFPSAEIIDTYLDLIKRMFPLRRCVKMKKRASPCMYIHI  
GRCPGACAGKISHEDYMKRVGEVRKLLSGDTESLVVDLGREMKRAAAELRFEEAAHLREA  
IKAVQSFMGHSNVDFNSLDARDYIAWEADGDQTSYVVFQMRDGRLLKNRDSFMENLVDEL  
EALDSFLARYYDGGRPVPPSIFVRKAENTASIAHYLSDRAGVPVEVKVPDAERHWA VMNL  
AVQNAREELAKRRRMHGDI AALVELKEKLGAVPTRIEGFDIAQLGGKHTVASLV SFKN  
GVADKKNYRYFKIRSV EQIDFAAMREAVARRYTRLINEEAELPDLVLVDGGAGQVSAA  
KEILDDLGLDVL AGLAKRNEEVWLPGESSPVLPKDSPALRVLVA VRDETHR FATGLSR  
KLRMTDATFRVLQEVPGIGDVRAKSILREMGSLDAVAQAEPGYISSIAHVNEETARKVIS  
VARRTVDIDTVDIDEGLEDAD\*

>SPBDM4\_v1\_50177|ID:27158540| GTP cyclohydrolase II (modular protein) [Uncultured spirochete bdmA 4]

VDIPSIEQIIKEDI EFLRHCPNKDHCAACEESVCVMVASVADFPTAYGHFTIAGFVNNKD  
NKDHIMIIGDIGDGENVLLRVHSACTGDALGSLRCDGCPQLHHALERIEKEGRGIVLY  
HQAEGRGIGLVNKL RAYALQDAGYDTYDANVALGFPPDARDYEIPAEMLKKIGVKSVRLL  
TNNPGKVAELEQYGIQVTERVPHELPPHMHNREYLRTKKERFGHLLLEDHGRE\*

>SPBDM4\_v1\_50178|ID:27158541| putative enzyme [Uncultured spirochete bdmA 4]

MDSVRWGVLSVSNHYRLRVHHLQLIGSGVTKVLGIASRDAGRAKQAARELGLARSFGSYEA



MLADPEIDA VYIPLPNHLHAQWINKAADAGKHLVCEKPFAMDAQAQAAEAVRYAESKGVVRV  
MEAFMYRFHPQWAHTKQVVQSGEIGKVQFVQIQFTYNNKDPRNIRNILD TGGGAMYDIGC  
YACSSSRFVMGKEPERAISIVRRDAEFGDTLSSAMLD FGDARALFTVSTQSFVQVQVDI  
FGTSGTITIFIPYNMYDDVPAEVRITTGIGPRMVRLGPAGQYRLMFD AFSKSIIEGKPVV  
TPPEDAIANMRAIDALFRSEKSGLWEKV\*

>SPBDM4\_v1\_50179|ID:27158542| Major facilitator superfamily MFS\_1 [Uncultured spirochete bdmA 4]  
MDEVLNNQKISLRFG LNYFMLFAIYGISSPYLQLMVQRLGYSPA AVGLFLGFFELIGITG  
PIYLAQIADRSGK LKPF LFASTVMILAGLGLLV SFHIPLVTLLSLALLSLGIKTPVPVLD  
TSLLR TIEFASTKGT KTPNYGLLRAIGSVGFVVALIAQSIPGFDSSPTGTMAFALGILA  
CLFLVSLFALPEIGTTQARKEKIAFSFKWLDSTYLLGLGVIALGRLAMAPIGSFFSMYLT  
EELHWHAVGAMWALSASCEIPFIILSWKFIQKKNPMLAIAISSGAI VVRLFIYALFPTPA  
GAITGQILHSLCYGLFQPAALAFVNLKTPPAARTTG MALYMGV GIGLPTFLGSALGGVVV  
ETFGYRWLFASYTLFALASLALFWKFRARLTA VR\*

>SPBDM4\_v1\_50180|ID:27158543| putative gamma-glutamyltransferase [Uncultured spirochete bdmA 4]  
MNFDPGYLPYPSTRYPVYARHGMVAASSPQAAAAGLVALRKG GNAVDAAVA AATALTVVE  
PTANGIGSDAFALV WIEREGKLYGLNASGWAPADISIEKVLARQGSATGGRVEAISGALP  
AAARMPVYGWAPTMVPGAPKGWAE L VRRFGALS LPA VM EPAIDYARNGYPVSANLARMWG  
RALEKYRKTCSGPAFEEWYRTFAPDGRAPSAGEIVRLPNHARTLELIAESRAEAFYRGEL  
ADRIVADSEEFGGYFSRADFAEYEA AWVEPISVNYRGYDVCEIPPNGQGIVALMALNILK  
EFSFAERESADTFHLQWEAMKIAFADGMGHVTDPKSMRVRPSDLIRPEYGAARAREIAPD  
GPAGLYGAQTTPKSGTVYLC AADGEGNMVSYIQSNYMGFGSGV VVRGTGIGLQNRGADFS  
LDPTHPNCLAPRKKTYHTIIPGFLKDG RALGPF GVMGGYMQPQGHVQTVTNLVDFHLNP  
QQALDAPRWQWLHGKKFAVERAFRPDIVGAL AARGHDIEVSEDSTPFGRGQILRLPGGA  
LIGGTEGRTDSNIACW\*

>SPBDM4\_v1\_50181|ID:27158544| Oligopeptide/dipeptide ABC transporter ATP-binding protein C-terminal domain [Uncultured spirochete bdmA 4]  
MTDRPVMLELKKLKKYFPVKRGLAIHALEDISFKIYEGEKFGVVGESGCGKSTLGRTILQ  
LYPPTSGACIYHGK TLEEVSPKYVKREIAELLYQKRACVFYQKSLEVEAHI AKLDKEKD  
ASTIAALQSRAKELRKDASRQLRDGSR TVGSLILSEKLPEIAELFSLSEQESERAHAGIL  
ELAKLEAELEERASHV ASDEIARKIGECRAFIGEHIKKSQGYREKAF EYRGKHLVPITE  
RCLDPA YQAKLDHNYERGINLGKLTGEEMRALRRDMQIVFQDPAASLDPRQTVGKAIEEV  
FIINTDYSPTVRWEKTV ALFEKVGLKREYCDYYPHQLSGGQKQRVGIARAIALDPKFVVL  
DESVSALDVSIQAQILL LLDALSKEKNLTYFFITHDLGVVKHFCDRILVMYLG NVCELAP  
SKTLFRAPLHPYTTSLLEAVPRPVVREQSKKERILEGEVPSALAPPPGCPFHTRCPKRMV  
ICTHDKPELREIEPDHFVACHLYDRSDA\*

>SPBDM4\_v1\_50182|ID:27158545| oppD| oligopeptide transporter subunit ; ATP-binding component of ABC superfamily [Uncultured spirochete bdmA 4]  
VPADAEADALLEQETDSPMEKILEVKDLVTSFRIAKKDYQVLRGISFDIHKNETLCMVG  
ESGCGKSVTALTIMDLLPNARVESGNIKLDGQELTTLTHRERNALRGEKMG MIFQEPMT  
ALNPLL TIGYQLTEGLRYHKRIDSKTARETAISQLKKVGVANPAERLRQFPFQLSGGLRQ  
RIMIALVMSLQPSLIIADEPTTALDV TIQKQVLALLNALKKDMNAGILFITHDLGVVAEI  
ADRIVVLYSGTKVEEGPVATIINSPKHPYTLG LLNAVPNVDKEDFTIQAIPGTLPHVTEE  
IPGCRFHPRCPYATERCRLEIPREFAY AAGHFVACHKVEEEARK\*

>SPBDM4\_v1\_50183|ID:27158546| putative ABC transporter substrate-binding protein [Uncultured spirochete bdmA 4]  
MKRTRSIFIAFVLI ALMLAATGSAFAANKKVTGDKMFNVALTA AFTGFDPLRTNDQASTY  
VNAQIYETLYRIGPDGDYIPLLAESLPDFSADGKSATVHLRKGVKFHDGTFNAQAVKYT  
FMLIKDPKFGSARASLAASIASMDVLD DYTIRFNLSYPDGVLLAKLAHTNSAIVSPTAQA  
KQDLMIKPVGTGPYKVFSSISGSNVVLTRNDQYWDKPPVIKNVTMTIIQDESTAVARMET  
GEADFMPELSVPQIDRVKSIPGVTVGTSESARITYVMLRPTS YVNPLMGKKEFRVAIAKA  
LDTRGYTETILEKYASPTGSMIGPTVFGYTPQAENYGYKYDPEAAKAAVKANHWENEKIK  
LFVPSTPVYTKLGEYFQANLKDAGFNNVQIEMIDWSAWL TESKAPNRFDISLAGWANVTR  
DGTELLEPNWESKVSARTKINNPEFDKLVYEGKTTTNR AVRIKKLDAANKLLLEEAYAVP  
VYNVAVNIFAYNSAYTDVTNDVSGTFYLCDFTVKQ\*

>SPBDM4\_v1\_50184|ID:27158547|yIiD| putative peptide transporter permease subunit: membrane component of ABC superfamily [Uncultured spirochete bdmA 4]  
MSAHHKNWMGSALRKLLKNKLATACAVFLVLEIAIALAPWIAPFSPDDTNISIRFAPGF  
WARFSDPDVAAKYVPGHIFGTDHLGRDVFSLIIGGRVSLTVGVFSTALGLVVGTVLGL  
LAGFYKRLDNPIMRVMDLLFTFPGILLAMLIVAMMGVSTVNAMLAIISIWSIPNFARMVRG  
KVLQVKEEDYIMAIRATGAKNARIIFVHILKNCLPLIIVIATMRMASSIISITLSYLG  
GVPPPAPPEWGSMAQAKEYMWKMPSLIVVPGVAVMLTVISFNILGDKLRDILDPSLKD\*

>SPBDM4\_v1\_50185|ID:27158548|yIiC| putative peptide transporter permease subunit: membrane component of ABC superfamily [Uncultured spirochete bdmA 4]  
VANYIGKRIALMFLLLLALTFIVFASLYIAPGDPAQMVAGLNATEDDIARVRTALGLDQP  
FIVQYWIYLRNLLTLNLGTSYSTHQPIAQEIIRLPNTLNLALASIILSILVGIPSGIIA  
ALRKDRADNLTSTSLAGISIPNFWLGTMLIYIFSVKLRWLPSGGMSAPFWTPQGFRQI  
ILPASALSTIASFTRIGRSSMLEVLQSDYIRTAKSKGLSGWLVMVHALRNALIPLVT  
QFGTSFGGLLGGAIITEQVVFVNGIGTYLINAINTRNYPVVQSTVLIIAAMFILINLQVD  
ILYSFIDPRIRYD\*

>SPBDM4\_v1\_50186|ID:27158549| conserved protein of unknown function [Uncultured spirochete bdmA 4]  
MNINDDKELLQSIEEGEWKTVSNFEEIKKNLMAAAAETAIKDYRINVRISKRDVEALKTK  
ALEDGIPYQTLVTSILHKYVTGRLQEMHPKETKETSFA\*

>SPBDM4\_v1\_50187|ID:27158550| conserved protein of unknown function [Uncultured spirochete bdmA 4]  
MSFYWDEDKNTLLKQERGISFERIVVAIEERHLLDVLEHPNKEKEYGNQIILVVEIEGYAF  
CVPCVPEENGNYFLKTAYPESRKYTKQYRGGNNEHK\*

>SPBDM4\_v1\_50188|ID:27158551| membrane protein of unknown function [Uncultured spirochete bdmA 4]  
MSASLWFLAVSDALKLQALVSFVLLAVDSVFPLAGALAIYLSAFALSLLLRQRRLAVYVH  
ALAYVLGWGFAGALLEAWVSGQALSPAALVQTARANPVVFGAMLAAVTVFWSRGAWLAAK  
AKTHAFVLRFDEGLAAFLCIFIAAFLRVRALTAEKLVIPYLAFSIIALGLSKSEHARR  
GGLSPASTRRALVPVAVVALVAVGVFFLMPALTEPARSAAALLKTGSLTLLSYIAAFLK  
WLFGRTRATFPGEEGASHLSQNQQFEKSNLFGTIMMYILGILVALAILALLAFLVVS  
WRFLKRRVGKEGSGVRNLPGLERLARLLAGLRRFLAALRAWKSRFFEKRSEAVRGMRL  
RTSGRAAGLVQKRTETPREYASRLAARFPAASIELIISSELEKEYGGVSLTMETRRAL  
SAAARHFHRYTFIAERLRHHQ\*

>SPBDM4\_v1\_50189|ID:27158552| protein of unknown function [Uncultured spirochete bdmA 4]  
MNENESSYFIYPISLVGLGAIFFAAANRALPLASFALISLALMLAIRLWGKLSLRLDI  
SLACDAQKLFAGETLSVRAQIANRKALPLWLRLEIAAPVGGAGIESLAGADSELSGETGL  
LPFGEISGAWQFRALRRGVYTLGPFAAQQGDLLGIYRCEKKLPTDWDIVIYPRRVALRQF  
DLPFRDYFGIHPKGIIEDPAWYEGTREYTGNRPARTIHWKASARLGKLEKIFPTSHQ  
KIFFLFEGLGFRAEDRMGFERALEVLGALANRFAESGASFGIATDCAVKGFPAIPLGR  
GPEHLGMLLELLARCEFERRGQSAELIGSVGAAGAGFLIVARAPDESTDRFFALPSARRN  
RVYFVFARANDGTEVEGELEARTEGGAVPSMGAAPDDTYTDEATEKGLRYPALYFDDLVR  
EEAQRPLSEAGRLDLSGYSGEAGHTGEAAP\*

>SPBDM4\_v1\_50190|ID:27158553| conserved protein of unknown function [Uncultured spirochete bdmA 4]  
MANDLLQNKDFLQACKKATLSAFKNKIDDAKLNSLLEHMPSPAAGPAKNVLRVSGGSGAI  
QAEASIVSAVIYAKVKCPDNKSWKFEESA WGP GIGGECIGFMYTAYTGDNAWDTFFND  
ATAYHAQGIAEAGGIFQINWFRSDGTPIGQFNALGGAGVFEIGGSGKWKKK\*

>SPBDM4\_v1\_50191|ID:27158554| protein of unknown function [Uncultured spirochete bdmA 4]  
VLAVLEGRQEEAGGLDKSAIYRLLRAGPNSLAI\*

>SPBDM4\_v1\_50192|ID:27158555| conserved protein of unknown function [Uncultured spirochete bdmA 4]  
MNKKTVYSDAPDDLGEVLLKGGKVDDFLPPPDLVRRVPKVKVTITLNQQSVEFFKSSAK  
KNKVKYQTMINEVLDKYVEKYSDTL\*

>SPBDM4\_v1\_50193|ID:27158556| ATPase [Uncultured spirochete bdmA 4]  
MERLIENYRRKIAAIQVKFIRSIAGTVAWDARLVGIRGARGVVGKTTLLQHIKQAFGDNL  
NAALYVSLDNLWFAEHSLAELADTFVKRGGTHLFLDEVHNY PQWSQAIKNLYDDYPDLHI  
VFTGSSLLEILNARADLSRRAVVYTMQGLSFREFLNLTGKDFPALSLEILQDHTTSLA  
DIVGEVHPFQYFPAYLQTYYPYFLEGLDVYALRLEETVHMILEMELPQLRHVDTA YVPK  
LMHLLSIISESAPFIPNISKLSDRIGLNRHTLLAYLQYLSDAKLTYSLYRDAHGISALQK

PDKLYLENTNLMYLFGRKETDTGNIRETFLANQLSYAHRLEFSVSGDFLVDGQYTIEVGG  
RSKTRRQIQGVDPDAYIAADNLEYGNDRKIPLWLFGLY\*

>SPBDM4\_v1\_50194|ID:27158557| putative ATPase (AAA+ superfamily) [Uncultured spirochete bdmA 4]  
MVRRELYLDKIRPFIGADVVKVLTGIRRCGKTVMMLGLLREELLRRGIPSSRMFSINFESG  
ADPEARSQESVYARIKTMAANAKGKLYLFLDEVQEMEGWERLVNACMIDFDIDIYITGSN  
AKMLSGELATYLGGRYVEITLYPFSFKEVMESYAQAGNPPDEAEAFARYLVGGMPFLYN  
HVLDETSKQYLSDFNSIILKDIAQRNKVRDIERLERLILFFIANVGNFSAASIVRYL  
KNEKRSLSSTETIYNISYCKEASLLHLVPREDLIGKKALSQEKVYLSDHGLREAVYGN  
QRDISQILENIVYMELLRHGYDVHVGKVGSAEVDFAAEKSGEKLVIQVAYLLADERIVER  
EFSPLAIPDNYPKYVVSMDDELDRGRNGIRHMNIRRFLEQSW\*

>SPBDM4\_v1\_50195|ID:27158558| protein of unknown function [Uncultured spirochete bdmA 4]  
MNLGSLFIPSQSCYPVGKHGMSVKSVTMGTVDKKDESRTFRSGAKFLIRLNEPEAAQGV  
AIVGHRLEPFRNYETPTEKIVFEDAAGKVLQRQLVMEAEALQFFTLYGELRMLPRIMM  
EDASNIEAFQQPGFTPEDKRVRVFALDLKAIGNGVSLAAGDYLAVTMLDAGGTRFKIEPL  
PIARFDTTLTEPWRNALAEAFREVFATEEPLNPIELMARVYRAAVPLVMERPGGAYSEF  
FNDSGILGTFWWQGVVWLDKDAAPKAVAKKMDTAYSSIIDDLKAELSVLRELAVDLRE  
SEEDYGDDFYSLAKEYDLSVDSSDIELFTVELSRYPGTTKLTRKALASNAALRERVTER  
AVDRVLVGLRLTGIPESGAKALRASALDAASDILDDFDLSIKNPAVNNLREALMDIYER  
FLLWMRIGREDLAFAPYDQERFEKLMKMNELLNVSYMLNELELPDDKLVKDLLKPGST  
GLAEYWETLKDLESLMPSRRAKKIPERGRISSRAVLTKQGYEASRYRYELEVVKGSNPR  
IYRTLLIPGNRTLADLHRCQLDAFGWKNYHLHEFSFDHMVFGEPSNEEDRVAIAEDIVSL  
DDLALKVGHKIEYVYDFGDTWVHSIKVKSREKLEGEVWTSKACADGARAAPPEDCGGI  
EGYKEMLAELEPSLFASGKKRTRWDPESEFDKEAVDKKLARR\*

>SPBDM4\_v1\_50196|ID:27158559| conserved protein of unknown function [Uncultured spirochete bdmA 4]  
MGYTLAMIRRQYWEERIHSWKSRSIVWLSGVRVVGKTVLCKSIEGIRYFDCELPSTRRE  
MEDPEGFLKSIGSGMIALDEIHLRGLDPAPLLKIAADHFPDIRIVATGSSTLGASAKFRDT  
LAGRKLELRLTPLCEKDNSFPGYGDRNRRFLNGGLPGFFLADTRDDREYSEWMEAFWARD  
ILELFRLERRASFLKFAELLLAQSGGQFNAASFAASCGVSRPTIMNYLGILEATHLVRVV  
RPYHGGGSREITATPRVYGFDTGFIAWSQGLHEIPAKEKGFWEHLVLNEMDAGLRDDTP  
LTWRDKEGHEVDFIWAAPRGAEPSAIEVKWSTGAFEPAGIRAFRALHPKGRNFVVAADLEH  
PYERDVGGLRVIFCPLGELIPQLLTKSAE\*

>SPBDM4\_v1\_50197|ID:27158560| ATPase [Uncultured spirochete bdmA 4]  
LLHAVWPEKTYASLENPDTMDFVQADPRGFLQGEESGMVIDEAQRYPPFLNYLQGYADR  
SSPGRYIISGSSNFLMEKIGQSLAGRTAVLSLLPFSAAELGREALEANWENAAWRGFYF  
RVRCTSLPPDLFARDYIATYVERDVRLVRNIGDLESFRRFVRLCAGRAGQILSIASLAGD  
AGISVNTAKSWLGLLQAAWLVFLLPAWHRNLNKRIVKSPKLYWHDTSLLCFLLDVRKPEN  
LAFHPLRGAVFENLIIAERFKAATHRGRTPSLHFWRDSTGREVDLVENAGDSGSTGKTGG  
ATSEGRAWECKSGMTVPGDFRHLALFGEEAGVPPERRILAYGGMESQTRSDARVLGWQD  
ALLEP\*

>SPBDM4\_v1\_50198|ID:27158561| conserved protein of unknown function [Uncultured spirochete bdmA 4]  
MERKKLADLEKWRQKPKRKLIVHGTRQVGKTWLLKEFGKRAYKDVA YINFEANERMAAL  
FSSNLDTQRLLTGLRIESGCSIEPGTTLIIFDEVQENPQAQTSKLYFAEEAPTYHIAAAG  
SLPGIAMHRGTSFPVGKVEFLDLYPLSFEEFLWALGEAELAGLLSGHDWQMLELFRDKLI  
DYLKYYFCVGGMPECVGSFAAGRDLKVRRETQGRLLSAYEQDFSKYAEPAMVPRIRAVWN  
SIPSQLAREQRKFTYGLVREGARAREYEIAIQWLCEAGLLHKVYRVSKPGLPLRAYQENS  
AFKLFMVDTGLLAAHAHLPTRAVLNNGSGIFEEAKGALTEQYVAQELRLRDDFDVFWSSG  
TSQAEVDLQIGESVYPLEVKAENLQAKSLRVYRDKFSPPRS YRTSLSPYRAESCLTN  
IPLYALAAIPTG\*

>SPBDM4\_v1\_50199|ID:27158562| protein of unknown function [Uncultured spirochete bdmA 4]  
MNRLTKNIIAHIPNPLFTAKELAVLEPSSDNVRYALVKRAIADGDILIEEDQLSEMTHAD  
FDELEGNYSSRRVLRFLAGLQEIIP\*

>SPBDM4\_v1\_50200|ID:27158563| conserved protein of unknown function [Uncultured spirochete bdmA 4]  
MQRTLMQKLVEWKDRTSRMPLLYGARQVGKTYLLQEFQYFRD TIYINFETDAALASE  
FSRDIDPVRLNLTLEIFFNKKIDPDSTVILDEIQACERALTSKLYFSERTPQYHIVAAG

SLLGVTVNRNQHSFPVGVKVEPLTYPLDFEEFLALGQEALISAIREAYAADSGLPEALH  
AKALELYKTYLVVGGMPGAVWAYLKERRMLDAAPVQNLILSSYVADMSKYASPAETTRIM  
ACFDSIPTQLAKENRKFQYKVVVRKGGSATLFGPSIDWLTAAGIVLKCARIEHPFMPLAAH  
LDLGAFKLYMADTGLLVKSGIPAQLLLSGWENNTFSGAIAENYAATNLKAKGYQLYYWE  
SGSTAEIDFVLQQNADIPELLEKAGIHTKSRSLAVYRERYKPAHAIRISQKNFLENGIK  
SVPLYAMFCL\*

>SPBDM4\_v1\_50201|ID:27158564| conserved protein of unknown function [Uncultured spirochete bdmA 4]  
MHGYIERSLTPAILNDIKLFPVAVAILGPRQAGKSRLAAHIAERSPASLRLDLENPRDRAK  
LTDPMLYFENKAGLMICIDDIQLMPELFPVLRSIIDRRPGRFLILGSASRELVNRSAE  
SLAGRIAYRYLTPFLPTEYLSGTPPSILDTLSRGGFPESALAENDAASYRWREAFKSYI  
ERDLSMLGLGASSIATERMLTMAHLQGQILNMAASLGSSLGISGPTVRARLEFLQEALL  
RLLPPWSGNLKKRLIKSPKLYIRDGTGLCHTLLGIHSVDELMGHPVFGPSWEALCVETLCA  
SFGAMASYRYSNGAELDLILEKGARRFVFECKASSAPQLTRGFHTALRDLQPEQAFVL  
CPIEDSYPLGPGITACGPVQCVELLRDLGEDF\*

>SPBDM4\_v1\_50202|ID:27158565| conserved protein of unknown function [Uncultured spirochete bdmA 4]  
MIYRDIIDRIRPWLSQDTILMLKGARQVGKTTILHYLQKEIEGQGGMARYIAADLDFADP  
SFGDPRLFILRLADLFQGKTGTVLIDEFQSIPNAGLFLKTVYDQTKDRYHFIVSGSSSLE  
LTKNAESLAGRKKKEFIIRPFSFREFIRARFPDIPLKCFGLDELRAIEDFAALYGTLLKEA  
YAEYL TIGGYPGPVLSPPELRVDILKELLSTYLHKDVAGYQKIENVTGFNNMVRLLSAQT  
GSQVNKSELGATLRLNAETVNRYL DILEGTFVFSLVPPWFSNPRKEVSKMPKVYVNDPGI  
LLAAGTRPAVRPAYELLDGHLVENAVYLSFVARAEKIRYWRITIGGAEVDFIVDTETGALP  
VEVKFTA AKPTEPVAMRNFRAAYTEARKGIIVSRDTISNDGTVVIPAYLLDFLTGLTE\*

>SPBDM4\_v1\_50203|ID:27158566| protein of unknown function [Uncultured spirochete bdmA 4]  
LRNNASDHSARLFPFFTHELAGNPLFVHASTDECLQRGWYPPFLFDRPFIPSDWYELYVAL  
YLEKDL SRLINIKDLSQFHK FISLCAGERFSFWHAPSAGEVDLVVEQGNDIRAIEIKSSA  
TFRPELSTGLERWGKLASLPPERLSIVYDGVEQFTFKGMRVVPWTRL\*

>SPBDM4\_v1\_50204|ID:27158567| conserved protein of unknown function [Uncultured spirochete bdmA 4]  
MIPRKDLDKLVRQADNHSASIIIGARQVGKSTLLGMIRDSLARPSEM FNLENPLHLALFN  
EGYTSFIRTVRTNTIFIDEFQYCKDISSVFKAVYDLNPQVKIYATGSSSMEIQ AHLKESL  
AGRKLETILYPLSYGEWLSKESPRERPLSSDITEVTGPDDLESHRKGLGEFLRYGALPG  
LLALSDDLEKREYLFGIYQTYIAKDIKAFLEESVLSFNKAITWLALHNGAQLNKSTLSA  
VAGISSRQIDRYLDVLVGTFLVALLPPLTNNRGKELTKTPKFYLYDQGIVNSIIQDFRSI  
DLRPDAGMLREQFVFWELKKSIDIRFSLHYWRITTDGKEVDFVLRKDQELFPVEVKSSWNP  
PALPTGLRHFLTFYPETRKAVVLYDGPERSRHGPCVVHFAPLHKAFALPGFLAG\*

>SPBDM4\_v1\_50205|ID:27158568| protein of unknown function [Uncultured spirochete bdmA 4]  
MSKYVIIRSMKNRLRTLDGLEVDLLVELAQGYLA FEIKSAERVSPVDARHLRGLGEFLDK  
PLLHSFVLSDDPETKSLAPDITAIHAAYFLG\*

>SPBDM4\_v1\_50206|ID:27158569| conserved protein of unknown function [Uncultured spirochete bdmA 4]  
MSVAIIRDRLATYDCKSEIEEQAVREITQELILAALGRTEFFKEAAFQGGTCLRVLYGL  
DRFSEDLDFALKERNPAFEWEKYLGA VTEELAA YGYRIEQDRSVRDAMVKKAFIKDDAI  
GKVLNFQYAGKTGVLGKIRIRLEVDSNPPAGSRYEIRYLDFFISSVVAQTLPSLFAGKI  
HALLCRDYLKGRDWYDFLWYTARKTPINYTLSSALAQVGPWKGV DLSVDYSWC FEALRN  
KIETTDWHSAAEDVRRFVRVRDQKSLDLWSRELFLRQLEKIPRE\*

>SPBDM4\_v1\_50207|ID:27158570| conserved protein of unknown function [Uncultured spirochete bdmA 4]  
MNRLTKNIIAHIPNPLFTAKELAVLEPSSDNVRYALVKRAIAGGDMLKIRRGLYALSPLY  
RKTGINPLSAAQLVYGPSYISLETALS VHWIPEGVRDITSV ALRPPKDFDTPIGHFSYV  
RVPQKTLYAGVNRGTGDEGQSWLIASPLKALADYVYCHKLDWTSKNPLIDSLRIEEDQLS  
EMTQADFDELEGNYSRRVLRFLAGLKKKEIVP\*

>SPBDM4\_v1\_50208|ID:27158571| conserved protein of unknown function [Uncultured spirochete bdmA 4]  
MQVQMPDLVDMLWFARKEAGLRYPKAAASRLAQK GELIRL KQGLYLRSGLEHNTYALGSA  
ANRLYGPSYISFWALRFYGLIPEDVPHVTSATFAKGRSKRFDTAAGGFFYHDVPSAAYP  
LSLTF LGDGEQQFLVASPEKALCDELYLKPQVRALKEIPALLFEDMRIDEERFFALDRAL  
LCSLAPVYRNTTLHTLIRFLEKEKT\*

>SPBDM4\_v1\_50209|ID:27158572| conserved protein of unknown function [Uncultured spirochete bdmA 4]

MIEAAVQLFEDRAEKNGLMERALAEIQYIALLGLSRRDFFYKSALYGGTALRMLYNLD  
RFSELDLDFSLDSDRNFSLDPYVSFVQNELDSYGFHTEVFVKEKNVQTPIESAFIKAGTK  
LHIVEARVPPSLTRRIAGNDVCKVKFEVDTPPAGIESDISYIDSPISFPVRVCDGPTLF  
AGKLSALLTRGWHQRVKGRDWFDMVFLINRNIPVSLSHLESRLRQAGFYTKVSHLSETEL  
RELLEKRIQDVDIELAKKDVIRFIRNPKDQDVVWSKDYFRYVAGKLRVQ\*

>SPBDM4\_v1\_50210|ID:27158573| PiIT protein domain protein [Uncultured spirochete bdmA 4]  
MNYLLDTHTFWLSLQSSSLPERVLKELRNPKNEVYVSAVTFWEISIKTRINKLDLEGIP  
FHDLILLAKKIDFQCIDL TSEEANSYVDLKDTRNDPDRILWQCICRNLT MISKDSAF  
ERFKDYGLKLLWE\*

>SPBDM4\_v1\_50211|ID:27158574| protein of unknown function [Uncultured spirochete bdmA 4]  
VTREMYGYLVNNSLKA YEFFFFGHFEIIGEVY GAFPIKDA\*

>SPBDM4\_v1\_50212|ID:27158575| Prevent-host-death family protein [Uncultured spirochete bdmA 4]  
MKTLPVGV LKAQFSEVLEKVKQGEKFGIVYGRKKKPIAMLV PFHDTETKKERKLGILDGK  
CTIHFADDFKMTEEELIGLQ\*

>SPBDM4\_v1\_50213|ID:27158576| conserved protein of unknown function [Uncultured spirochete bdmA 4]  
MQGSVDTKVSECFIFRNFPRAIIPRMSEKNETSSIIDNASKVVVVGKRRALELMTVALLA  
GGHVLLLEDVPGLGKTLMAKALARSIGGEFRRIQFTPDLLPSDVTGFSVYNQKSGEFV FHP  
GPVMCNVLLADEINRTIPRTQASLLES MGEFQVTVDANTIDLPRPFFV VVATQNPIEMDGT  
FPLPEAQLDRFLMKIDLGYPDRDEELLILDRFLMDDPLVELAPVTSPERIVELQKKRGGI  
TVAAPVREYIAALVGATRNPVRYGASPRGSLGLIKCAQALAFARGREFVIPDDAKELA  
GPVLTHRLILKHEERAKGATAQAVVEEILGKVPV PRI\*

>SPBDM4\_v1\_50214|ID:27158577| Prevent-host-death family protein [Uncultured spirochete bdmA 4]  
MKTLPVAEIRTKLSSLLKEVESGKEIGITFGRKKETIAVIVPINEYKKIKARKLGTLEGK  
AKVTFSEDWEITDEEFINS\*

>SPBDM4\_v1\_50215|ID:27158578| transposase (fragment) [Uncultured spirochete bdmA 4]  
MHRDLKAEATRPPGKNMLAQQRKFNHFREEYNTIRPHEALGMKTPAEVHTWSNREFPRI  
RDWDYEKDIMPKMVTVNGAIRWKNKGFAMISTALGGKYVGLSAVDDGLWL VYYRHVALGY  
FCERTMKVYELNDFDF\*

>SPBDM4\_v1\_50216|ID:27158579| conserved protein of unknown function [Uncultured spirochete bdmA 4]  
MHAGTSFPVGKVEFLDLYPLSFEFLWALGESSLAGLSRGHDWQMLSEFRDKLIDYLYYY  
YCVGGMPECVNNFIATRDLNRVRDVQGRLLDAYEQDFSKYAEPAMVPRVRAVWNSIPSQ L  
AREQKKFSYDLIREGARAREYEVAIQWLC DAGLIHKVYRASKPGLPLRVYQENNAFKLFM  
VDTGLLAAHAHIPMKTMLQGSDFREAKGALTEQYVAQELRLRGDFDVFYWSSDRSQA EI  
DFLIQAGESVYPLEVKATENLQAKSLRVYRDKFSPPRSYRTSLSPYREESWLTNIPLYAL  
SALPV\*

>SPBDM4\_v1\_50217|ID:27158580| protein of unknown function [Uncultured spirochete bdmA 4]  
MSEKNEASSIIDNASKVVVVGKRRALELMTVALLAGGHVLLLEDVPGLGKTLMAKALARSIG  
EFQVTVGANTIDLPRPFFV VVATQNPKVRYGASPRGSLGLIKCAQDYPQARGTGEGRHRS D  
RQRRQRIEWNIGQPALFPVWRK\*

>SPBDM4\_v1\_50218|ID:27158581| putative Polysaccharide biosynthesis protein [Uncultured spirochete bdmA 4]  
VHAIDAIKQKLKGLSGDNKSVLTLVGGTVVAQGLSFLFSPITTRLFSPEVFGDLSVFTSI  
TGIVGVVCLRYELAIVLPQDDDEGFSLLKLCFIFTSFVSVVTGLVLLFGGEAIYTKFGA  
KNLAGYWYYVPISLFTGIIQASNYWLTRTRQFTVLSWNKVVPVIAVNLV SIGLGFAGNR  
DIGARLFAILVSNIANIAVIARVVAPELKP KKHARKYSYRELIGRYKNFLVYDIWGALLN  
NLSWMLVPILMNAYYGSNAAGQYSIGMRVIQMPASLIGASISQVFLKNASEKRYSKTLYP  
YCIETTKKLFKYTAPIVIVLLLLGKPVFHFVFGDKWDLAGVYTQILAPWALLWFCASPMH  
SVFTITQKQNVYLVFSIVNLATRFLSLYLGKMMNSDIWGIAFFSISGFIVYGISLILALR  
EAKKSDLSPANS\*

>SPBDM4\_v1\_50219|ID:27158582| conserved protein of unknown function [Uncultured spirochete bdmA 4]  
MDKTQFTYALIGCGRISYKHIEAALKNRDRIRLVAVCDSIFERAERVRDYQKGIPDAIV  
AIYGDYREMLEKEHPDICTIATESGKHPQIAIDCLQSGAHVICEKPMALS IADADAMIAA  
ADNAQRKLA VCFQNRFNAPVQKARKAYEAGRFG RMLHGMIQVRWNRDKAYYAQAPWRGTW  
ALDGGTLMNQCTHGDLLQWMMGGDAVRVQAATR KFLRPIEAEDFGSAIVEFKSGAVGII  
EGSADIYPANLNETLSLFGKEKGSVVISGLAVNKIETWRFSDAETVGDTE DIVLNPNEKDP

PTVYGFHGSALYADFLDALENDREPLVSGARGKKALEIILAVYKSQKTGRAVELPLVDFS  
TLEML\*

>SPBDM4\_v1\_50220|ID:27158583| Acetyltransferase [Uncultured spirochete bdmA 4]  
MASPIERHIAICDVQFGKNVVIEPANLYGCSIDDDCAIGPFVEIQKDVHIGARTKVQSH  
TFICELVSIGTDCFIGHGVMFINDTFQDGHPAHRDKRKKWKSTYIGNNVSIKSNATILPVK  
ICDSVVIGAGAVVTKDIIIEPGIYVGNPAKKFK\*

>SPBDM4\_v1\_50221|ID:27158584| rkpK| UDP-glucose 6-dehydrogenase [Uncultured spirochete bdmA 4]  
MAKNICVIGTGYVGLLTAVGLADFGNQIIGVDVDGNKINSLNEGKSVIYEPGIEEYLTKN  
ISAGRLRFTIDLQSALEKSEVVFAVGTSPLETGEADLHLYEVIDSIADNIKEYKLIVI  
KSTVLVGTNRNIYNRIKAKTSTPFDIVSNPEFLREGKAVYDFFHPERVVIGYNSNAKEI  
IEDIYKAFNRASVPFVWCNWETAELIKYASNAFLAIKIGFTNQIASLCEEVGADVRIVSK  
AMGMDGRIGSKFLHSGPGYGGSCFPKDTRALASVGKKKGVPITIVEAVIEANENQKKRVV  
KRLEKRLGDLKDKEIGILGLAFKAETDDIRESPAIDIVSSLSLFGARIQAHDQPAMS NFS  
VLFPAIKYMNSAYDVAKGCDALLILTEWNEYRSLDMVKIKEYMANPYIFDTRNIAEDEL  
KKYGFSYDFIHLGSS\*

>SPBDM4\_v1\_50222|ID:27158585| degT| Pleiotropic regulatory protein [Uncultured spirochete bdmA 4]  
MDNIPFNLYEGINPIYSEIMDKIGELIKTAEFIGGKEVELFEKEYAEWTHTKYVVGASN  
GTDALIIALKALGVGPGDKVLVPDNTFIATAEAVTAVGAEVDFIDIESDYYAMDPIQVEE  
YLKSTKGRNVKAIIPVHLYGQMANMPVLREIADKYGIKVIEDSAQAHGSKLLGNQPGYWG  
DIATYSFYPGKNLGAFGDAGAIATNNPDL YKKCRMLVNHGRWHEKYTHEIEGYNMRDLTI  
QAAILRIKLQYIDEWTQNRKEKVSKYLHLLAGIDSVISPRVRREAEPVWHIFVLCKDRD  
STIERFKKAKISYGIHYPVPLHLQPAYNYKSYRANDYPVAEMISSRELSLPLWPEINEDI  
LKYITECL\*

>SPBDM4\_v1\_50223|ID:27158586| degT| Pleiotropic regulatory protein [Uncultured spirochete bdmA 4]  
LNVPFYTSTREYHDHKDEFDAAVQGVMERGDFILGNEVAEFEKEAAAWLGVKYAVGVASG  
SDALVLGSDILGFKDGAEVLTPFTFFASTSCVARLGGKPVLDMDDEETLEMDVAQAAGK  
VSDKTVGIIPVHLFLQPTPMQEVMEALARTYNLKVLEDAEAWGMESRVDGVWRKAGTIGD  
IGGFSFFPTKTLGSYGDAGLMVTNDEELYSKIKSYRVHGSSVKYHHDYIGYNSRLDSLQA  
AVLRVCLKITNEAIAARARHAKHYTERLSGISGLRIPLIGQSRGVYVYVYNILVPRRDEL  
AATLKGKGIGTSIYYPIPLHLQKCFAYLGYKEGDFPVAERVCRQILALPIFPELRDDEVD  
YVCDNVEDFYITKKN\*

>SPBDM4\_v1\_50224|ID:27158587| UDP-3-O-(R-3-hydroxymyristoyl)-glucosamine N-acyltransferase [Uncultured  
spirochete bdmA 4]  
MKLSAIKNIISDIVIVRDAEFYELGLTATQCSVSMLSFLENTKYIDELLSNATISCAIVN  
PETAEMIKDRRTTIGIAVSESPKHSFFFLHNYLIENTDFYGGSDGSIIDPSADINSTAWIS  
KTGVSIGAGTIIGPHVSIYPNVRIGNNVTIGANSIIGGEGFECFRFQDKAFMVKHAGNVL  
IGDNVDIQASCCIDKGLFKNSTIIGEYTKLDNLVHIAHNVLGRRVFIAACAMLAGRVTV  
GDDAWIGPSAALRNGITVGNGYVSIGAVVTRDVLGQMVSGNFAIGHDKFLQFIKSIR\*

>SPBDM4\_v1\_50225|ID:27158588| protein of unknown function [Uncultured spirochete bdmA 4]  
LQKLVMPNCKISRDLHPFKDITSNDSSNRYIAIITDSNTITKRSTWPNPSIIPYSYTPRK  
HSTCSNKDTSTKNYIMSYMYQIIELSIFTNYS\*

>SPBDM4\_v1\_50226|ID:27158589| conserved protein of unknown function [Uncultured spirochete bdmA 4]  
MVFTYDTYKYLMSYLLKNDYEPILIGKEKGSVSKKQLFLRHDVDTDYLGVLPLANVERGL  
GIFSTWYFLPDSSIYNLLCHELGQIIIELDSMGHQVGLHIDASQYESVEQLEADIERIYA  
FLNVRLPLSKTVSFHKPASWLLNDIVIDGWTNAYEKTYYSNVVYVSDSNRRNFMDEDRLS  
NAVQQGKSLALLTHPLWWHERPEDFDEFSEACRCLGYDRIHNYLANTARSYAEKGIRGI  
VR\*

>SPBDM4\_v1\_50227|ID:27158590| protein of unknown function [Uncultured spirochete bdmA 4]  
LLFSIILKKLHEGLSWVLLWIQNMPFSHFLTMQFLANKHNSIIPRSIDPNFP\*

>SPBDM4\_v1\_50228|ID:27158591| putative UDP-3-O-[3-hydroxymyristoyl] glucosamine N-acyltransferase  
[Uncultured spirochete bdmA 4]  
MISCELSKEVLQQVTGLLIPREGDFKYHHICSFDECYDNSIYFLGKKINGINLLCKNAED  
SIYFVEKTVSFNNASSDSIIYVENVRNIMMKILLYLEEGLDDFIDEDYYITDKKSKIH  
KTA VVDNNTAIGSEVIIGPHVYIGRNVAIGDNTRIFSGVKIVRNVSIGKNCLIRENSVIG

GGGFGIEKDESGNNIHIPQLGGVVIGDYVEIGALNTVCSGTIKPTYVGNVYVKTDDHIIHIA  
HNDLIEDNTSITAGVIISGSVIKQGSWIGINSSIKQGVKIGENSLIGMAACV NKDVQEG  
TTVIGNPAKEISEFIK VQNKINSIL\*

>SPBDM4\_v1\_50229|ID:27158592|wbpA| UDP-N-acetyl-D-glucosamine 6-dehydrogenase [Uncultured spirochete bdmA 4]

MTEQVDSLLERIEENSIIGIIGLGYVGLPLAVSFAKKGIQVLGFEKSVAKTDRVNAAKN  
YIADIKDEDFTKVVNEK KLSATGDLGRIKECDAIICVPTPLDKFKKPDMSFIESVCVEI  
GQNMKAGTFISLESTTYPTTTEEFVKPIIERESGLKEGVDFWLCFSPERVDPGNKTYKTE  
NTPKVVGGLGKEAQTIAMALYGKAIQNL YPVSSPRVAEMVKILENTYRLVNISLINELAL  
LSGKMGINIWEVIEAAKSKPYGFQAFYPGPGIGGHCIPDPFYLEYIAKGYNFDLTMIDA  
AGRINNLMYPYRMMNKISYALNRQ GKAMNGSKVLFLGVA YKPDIDDARES PALLVMHEVAR  
KGAEVLYYDPYIPEVIDEY GKKWTSTPLADDLIEK VDCVIFTTNSHSAFDVEHIVGKAKLV  
VDTRNAVKSVEIEDGKVFKL\*

>SPBDM4\_v1\_50230|ID:27158593| conserved protein of unknown function [Uncultured spirochete bdmA 4]

LRKIFFISASII EYDGR LRELIEVSKSIGETY YLTRSNSVTPIDEHHIIFTSRGPSTYIN  
FLLFCFKTARKIGKFDVIWADNRKALIPSFLIARLRKHPILIQDARELYMFGDVRHFIGK  
IGCLVEIMLNRKFDIIICANKERAEIMKRYHLRMMPLVFENVRKLEFDGTVDAAFEER  
YQMSKDKARWKIISTSGCDLDRGIEQLVEAVGRLGEEYSLYIFGNSSMKQEDFIERKIME  
IEYKNIHIFGPLKQDELKYAIGMCDIGVVNYHAKDMNNKYCASGKLYEFIFEGVPVITTE  
NPSLKALCERFEV GISCNDYQSAIRKLT EY EYYQGKAREMSKKISVKS NRAGLKHVVVK  
ALETIERDRSGKYPEVV\*

>SPBDM4\_v1\_50231|ID:27158594|rffE| UDP-N-acetyl glucosamine-2-epimerase [Uncultured spirochete bdmA 4]

MLIFGTRPEAIKMCPLVNELRTRIGIRVLVCVTGQHRQMLDQILKAFGIRPDYDLSIMQD  
KQTLFGITSNILNKIKDVLEKEKPDVVLVQGDSTTFVSALACFY LQIPVGHVEAGLRTY  
NIYSPYPEEFNRQAISIIAHYNFAPTELSKQNLLEGGKPKTIFVTGNTGIDALKTTVRE  
DYWHPELEWAMGSRLLIIT AHRREN LGMPMHNMFKAIRRMDEYSDVKAIYPIHINPVIR  
EIAEEELGGCSHIIIEPLDVLDFHNFLARSYLILTDSGGIQEEAPSLGKPVLMIRDTE  
RPEGIAAGTLKLVGTDEKMIYESFKRLLDRAEYERMASKASNPYGDGFASKRIADILCAN  
\*

>SPBDM4\_v1\_50232|ID:27158595| putative Glycosyl transferase protein [Uncultured spirochete bdmA 4]

VKLLLMIPYCSQKTYSAVFINASIQTNQFHKYFRLFTAGLIANGLDVVVGCQFDVNTTS  
TKQRVISM PDESINGVRFHYFKTYNISIIGRICKFFQSLVYTF SFCMQNRGTIVICDPNK  
VASAFGVMMGTKLARGNLVYILSDLPSINTGSLEEKQSLRQKLADLIISKADGYFFTKF  
MNDLLNKQNKPYVII ECLVDEKLENIRC NLADKYPTRVMMYTGGIVAHYGLEQLLEAFEL  
AGVPNTELWIYGGGPYAKSLTELCAGKDTV KYLGILSNEEIVKEQMKATILVNPRLTNYE  
YTKYSFPSKNMEYMVSGTPTL TTRLEGIPEEYNAHVFFDSESV EGMAKTIRDIYSHSDA  
ELYLFGQETKEWILRNKGYTAQLRKFYERVLTTL\*

>SPBDM4\_v1\_50233|ID:27158596| membrane protein of unknown function [Uncultured spirochete bdmA 4]

MEAGSNLKPISRLPVVDWIFIFWCQEILIDYLLQIYRRIPIIGDITYQAVIPLIFFLLF  
IITLYARLKVKLIDIVFVIMAMLPCIFALVQYQEAANELPTFFLKVFPMFFVGLFLNED  
KKVWKSYSLSFQILYILAITNLIANFLYTSY YLSSRVLEGYSMTWAY SILPSVLMIIFWGV  
KGKRVIADILSVFGFLLSYGSRGPIVCVLVFTVLLIAINMVNRKKYSIIVLFCILIVI  
IMNTNYVSLIVSYLQGIISRTGFSTRVFDMMLRNDILSDTGRSPIRAALLSAISERPLLG  
YGLYADRYLSSSGIYISGMYAHNFVLELWTQFGV VIGSLIIFAIGALVINAVVKAKENHS  
RLCMLLIFICVGVVKL FMSGSYLQEPYFFLLIGYCTKIIREKRSTGRVIKYANSLAM\*

>SPBDM4\_v1\_50234|ID:27158597| conserved protein of unknown function [Uncultured spirochete bdmA 4]

MRILWLCNVALPFISIDAKLPTVSVGGWLTGAYEGIKNCSDIVLGICFPVDISEPVKKGTT  
VENITYYCFRRGNQRLTKYCSVYESIFRGIADFPDLVHIFGTEYSHSLAMTLAFSNPK  
RTIINIQGLVSITAQHFRADVPSRYFYGGSLRNVIKCDLFEQRKQLEHRGQFEIAAIKN  
CGHIIGRTDWDRACTEQINPTATYHFCNETLRPVFYKNRWQY EKCEPFSIFVSQSATPIK  
GIHYLFRAMPEILRQYPKTKIYTTGRSPFKTPWYKRSNYEK YLMRLMEEGRFKDNV FYLG  
SLNEEQMCNQYLKSNV FVSSTIENESNSLSEAKILGMPAIASFVGGVTNRLEHNIDGFL  
YQYNAHYMLAYYVCRVFS DRKYAENLGDNARIHAQKTHAIKENAEVLVKIYREVL\*

>SPBDM4\_v1\_50235|ID:27158598| putative Glycosyl transferase group 1 [Uncultured spirochete bdmA 4]

MKILHLCLNGPYTDNWGYQENILPKYHRLAGNNVTVIVSNMKHLPSGEIVEVDGGISYTE  
DGVK VIRVAPKILISRKCTELLKPYPIYKILYREEPDFIMVHGLMGSISELSVKRYVRNC  
NPKCIVCADLHEY YLGNRGGNISIKLALIKSYYRSVNKL MYPLYKKVFCITPNCMDYAKD  
YYHVPKAKLELLPLGYDPQKIASTNRNSIRHVIREKYHIGDGNLIVHGGKIIPVRKTME  
LIDAAAMLDDPRIRLIIFGGADSECMLLLQERMQR YAKWIRYTG HLEQKDYYDLYLASDF  
AAFPGRQSTIWQEAIGCGLPLLIYRWDGVEYLD RGGNIAFIESQESAAIKRGLEGMLEDN  
KYIEMA EVAKQKAAPFFSYERIAQQVLDSSMK\*

>SPBDM4\_v1\_50236|ID:27158599|capD| UDP-glucose 4-epimerase [Uncultured spirochete bdmA 4]  
MMNKYILMITGGTGSFGNAVLRKYMDS DAISEIRIFSRDEKKQDDMRHLYQSEKIKYYIG  
DVRDMRSVMSAMKGV D YVFHAAALKQVPSCEFY PVEAVRTN ILGADNVLTAAIECGVKRV  
VVLSTDKAVYPINAMGMSKALMEKVMIAKSRDLDEKKQIVCGTRYGNVMASRGSVIPLFI  
EQIITGKPITITDPEMTRFMLHLDEA VELVEYAFKNAHNGDIFVKKAPACTLADLAEALK  
ELLEADTEVRVIGTRHGEKVYETLVNREEMAKATDLGGYYRVPADTRDLNYDKYFSAGNE  
KVKQAAEYTSHNTRRLDVEETK KLLMTLDCVHEARRQ RGL\*

>SPBDM4\_v1\_50237|ID:27158600| NAD-dependent epimerase/dehydratase [Uncultured spirochete bdmA 4]  
MKVLVTGAAGFV GQNL SIRLSRENDITLLPFDIDNTEAELIDALSVADAVVHLAGINRPL  
DPSEFVTGNVGLTSTIADALEKFQRPLPIIFSSSIQAEQDNEYGKSKHAAEERLKS YAEK  
TDAGVQIFRFANIFGKWCRPNYNSAVATFCYNIAHDAPINIRDPDAPLRLVYIDDVVEAI  
TAALRTEKKGF AFCSAEPVYETT V GAI AATIRDIHDTRADARVGDYSDPFYKKLATTYLS  
YIDIPALATAPELKSDERGWLFELIKSDSAGQIFVSTTKPGKKRGNHYHDTKVEKFCLVK  
GQARISMRKVNGTERHDFDLDERDIRILDIPPGYTHSIENTGSEDCILFWANEIPNPVH  
PDTFRLEV\*

>SPBDM4\_v1\_50238|ID:27158601| UDP-N-acetylglucosamine 2-epimerase [Uncultured spirochete bdmA 4]  
MKDKLKVMTVIGTRPEIIRLSEVIRACDKCFDHVLVHTGQNW DYT LNEIFFKDLGLRAPD  
RYLNVVGDDLGETMGNIISASYKLFLEEKPDALLVLGDTNSALCAIPAKRLKIPIFHMEA  
GNRCFDQNVPEEINRKIVDHIADINLPYTEHSRRYLLSEGFRKEHIFVTGSPMVEVILKN  
RAKIESSKALEEYGVQKGDYFVLSMHREENIDIEHKFNELVTALNSLAERYNFPVIFSTH  
PRTWKRLEANHISLNPLIHSVKPLGFTDYCRLQCDAKCVISDSGTLSEESSILRFPAVLL  
RNSTERPEVLDKGTIVIGGYTAETLLQSVTMAMDLFDGEDRRPADYRDSNVADKVVRIIQ  
SYTPIINKIVWNK\*

>SPBDM4\_v1\_50239|ID:27158602| protein of unknown function [Uncultured spirochete bdmA 4]  
MKIEATKQQLIEFLESHVLT PVEHHIGADET IKRKRVRATRMHLNLRSAEEVEDFFWNTM  
ASDHGIDSYIRIRAIGGITFEDVRQEFKSPYGR TKANYFNK\*

>SPBDM4\_v1\_50240|ID:27158603| Glycosyl transferase [Uncultured spirochete bdmA 4]  
MISVIIPCYN EEKYIGPFLESLLHQ TIGIDNLEVIIVD GMSNDGTRKILKNYLNNQNILL  
IDNTERTVPFALNKG IQYSHGDYIGLMGVHCKYPEDYFEKLYSAIRQYNADC VGGASITR  
PARNTSLCSAIAIAGSNIFGVGNSRFRIGVTDIQEVDTVAFGLYRREVF D KYGYFDTALT  
RDQDDEYNARLKKNNRKILLVPNVRIEYYARDSKKKLFQMNYQYGLFKPLVAKKIGKPIS  
IRQIVPFLFVCWLLIGSII SIFS KAMMIINVGIALVYIGISLAISLKEALHVHDMKLIIFI  
LPQIFFIQHFAYGCGYLSGIVYFLLL GREKVDLKVSR\*

>SPBDM4\_v1\_50241|ID:27158604| conserved protein of unknown function [Uncultured spirochete bdmA 4]  
MSVTDKTRKLIWVK TGNRCAICRQKL TIDETSKDSDSVVGDECHIVSESENGPRFDKSYP  
EERIDSEENLIVLCKTHHKMIDDQVD TYTTEVLRAIKKNHEKWVETKLSQNGEIKPVRIV  
RHKNKIPKLSRVT DGQELFNIASSYLSYHDFPDNLSTEEAELIGSFLQNVTDWADLSD  
AIEPIDKVRAVKSISDNL DRLQDYGFLVFVAVEEQEIEGGIGPSSIWNALHLLTIVQDDDP  
RIQK\*

>SPBDM4\_v1\_50242|ID:27158605| DegT/DnrJ/EryC1/StrS aminotransferase (fragment) [Uncultured spirochete bdmA 4]  
MPKDYLLGMSDVQKRAAVKALTKLPRMNALRKANGALYTSHLAQAGLNHVDP SLHENHLF  
LNYPLL VHNRAAFIRKAREANIPLGDWFCSP LHPVEGNLSQWKFD PDRYPNAVFAASHV  
NLPTDTRKPEKVLDFIDKNSSLIMDMTLGGRITNP\*

>SPBDM4\_v1\_50243|ID:27158606| UDP-4-amino-4-deoxy-L-arabinose--oxoglutarate aminotransferase [Uncultured spirochete bdmA 4]  
MITQRTIAFSPDISDEEIQEVVEALRSGWIT TGPKTKLLEQGLASFCHV PKAVCLNSAT



AAMEMTLRLLGVGPGDEVITSAYTYSASASVIDHVGARIVLVDSGMDSFHIDYEAIADAI  
TERTKAIIPVDIGGVMADYDRLFDIVESRQQLFRPSNELQEVFGRVIVLADAAHSVGVAVY  
KGKMSGEVADFTSFSFHAVKNLTTAEGGAIAWRERDGLDSEALYRRLMLLSLHGQSKDAL  
AKTKLGAWHEYDIVGPWFKCNMTDIL AALGLAQLRRYQGILQRRREIIERYDALFEDAPVA  
SLRHYTGESSSSGHL YLVRLLGKDEAFNRVITRMAEKGIATNVHYKPLPMHTAYKNLGF  
DIRDFPHAFEMYRNEITLPLHTLLSDEDVEYVAVSLKETLRELAH\*

>SPBDM4\_v1\_50244|ID:27158607| Sugar transferases involved in lipopolysaccharide synthesis [Uncultured spirochete bdmA 4]

MLLKAWDAMPARMRNAPVRGYYELLRQKRAALVLKRLFDVLA SIILLAILLPLLLALIVL  
IKLDSEGPVMFRQTRVTQYGRQFRIYKFRMTMVHHAESLGTQVTRDDARVTRAGRMLRKL  
RLDEL PQLFNILVGDMTFVGTRPEVPKYVARYSDEMLATLLLPAGVTSEASIYYKDEEQL  
LADARDADATYLG EVLPAKMRYNLEGIRKFCGSYELRVM SKTLVAVTKK\*

>SPBDM4\_v1\_50245|ID:27158608| protein of unknown function [Uncultured spirochete bdmA 4]

VPKYDLGESISRLERGVVKYEVLKAICDTYFVFKRENATSHRFYEDPYAGGIVNIQSGPS  
GDAKRYQQRQVAALLKRRNEEG\*

>SPBDM4\_v1\_50246|ID:27158609| conserved protein of unknown function [Uncultured spirochete bdmA 4]

MDIIDKYEFLHYSEEDAAFISVAEFPYLSADGTTPEQAYAAIRSVVEEAVGILAE EGR  
EAPIPLSEKEFKGNISLR LSPETHRMATMRSRQEGCSLNQFLTSLIERNLY ADSIDKAVK  
QLSLATLTLSSQFEGGPWQQPTQVASIWAKNSQPSYSDAFAANSASYAIVQMNVSTVAPS  
LGAELCK\*

>SPBDM4\_v1\_50247|ID:27158610| protein of unknown function [Uncultured spirochete bdmA 4]

MQIIDLRSTLIDLFPVDSLDFMALMLDSFSTAIINKYGC AKLNVPPPSGSVGLVFTLGKV  
EIHGKVKIIDRIVVEERRIIVTIGGSSDEARVLMKDLILLIASCETRHEIRPISPVEID  
ESQSTVQLSIDFSRLVSGSIAESIPESLSSRTVIAP TSMRAAITPAGLRFKIRYLG ENED  
LKNHSITMADKYL SIEAREGIGIEAKIFFASAPVKS DTLLELLRSFE\*

>SPBDM4\_v1\_50248|ID:27158611| ATPase (fragment) [Uncultured spirochete bdmA 4]

MRSLSRNISTLASNETIRADIAMSDEDENISDKTILQYL RALNRIFVTDNLPAWNPALRS  
KTAIRTPKRQFADPSIAVATMRLSPGRILDDFEYFGFLFESL CDRDLRVYAEANDGQLF  
HYRDS SLEADA VICLHDGRWAPIEIKLGKKEIEEGAKHLIELKSKINTTKMKEPSFLMI  
VTGTEVAYRRDDGVFVVP IIGCLKN\*

>SPBDM4\_v1\_50249|ID:27158612| putative transcriptional regulator [Uncultured spirochete bdmA 4]

MSKSYDSIVRGL EEIKAHTEGEIQLKTTRVEIHLPPHCDASTVKELRKDLRLSQHAF AKV  
MGVSPKTVEAWESARNVPSGSSCRLIEMIRNDK TILKRQKIVVVS\*

>SPBDM4\_v1\_50250|ID:27158613| protein of unknown function [Uncultured spirochete bdmA 4]

LCHKEEQLRADARDASKDLRSLVVGKKPLDLLKKS NPEAFYYWYRIEKLREEREPIHTLD  
E\*

>SPBDM4\_v1\_50251|ID:27158614| conserved protein of unknown function [Uncultured spirochete bdmA 4]

MKATV SERGQITL PKAIRTKLGIRPGTII EFLVLENDKIIGTKKEPRDALRTWRGKGR LPD  
GIPDV DAYLDEV RG\*

>SPBDM4\_v1\_50252|ID:27158615|vapC| Ribonuclease VapC [Uncultured spirochete bdmA 4]

MTTAIDTSVLLDILTDDPRHASSSEAA LAEARASGR LIVCESVIAELRPALDSDQQIEAF  
LQDMGIEFLPASLESALLAGSIYASYLKNRGPSRRVLPDFLIAAHAQLHADCLLARDRGY  
YREYFRELNVMDHVNK\*

>SPBDM4\_v1\_50253|ID:27158616| protein of unknown function [Uncultured spirochete bdmA 4]

MTRGELWRADFGFPFGRGPFRRPILIVQDDAFNESKINTIDFEEACAREQGEDSTRVAV  
IVPSLTFIADISAWFS\*

>SPBDM4\_v1\_50254|ID:27158617| conserved protein of unknown function [Uncultured spirochete bdmA 4]

MSENIRFKYVFPDDYNPVYVNGAYGGV GPRGEIIMNFY LERSPVPREEFRTVNEDGTISE  
QIKIEPEDLSRTIVRYVSSGVIMSPETARLIHTWLGEHLKRIGEGGKA\*

>SPBDM4\_v1\_50255|ID:27158618| protein of unknown function [Uncultured spirochete bdmA 4]

MSDACIMGSKIIRYQQFFIGTGYANGTILPAGFCDAASADTGNVDSAEKQ GKQMLNRRID  
SIAGLKDDWNGYGA VSFSSAVVGNARALV SLLPCKAKVFPTAQSSIQFEFDTVPGKYLEV  
EVFSDHYAMFFDDSTVQEELDSATQEYILQRIAEYNAK\*

>SPBDM4\_v1\_50256|ID:27158619|pglF| UDP-N-acetyl-alpha-D-glucosamine C6 dehydratase [Uncultured spirochete

bdmA 4]

MIKESERKWSMLKIFDKIDRRFLNFCVIAVVSLVTFWTFSSFHKPFIVVLVVLVIALR  
MLASFFIFRDYASSWRRSTQVTYLLKSFVYTVAFVVYLPIFYGKVEVALLVSELLFFIFC  
INFLVAVYSYIMNKTRRPKTKSVVIYGAGRAGTKLREELVNSEYKVEYFIDDASSLHDRN  
INTVRILSREEFKKRARGEKPKFSMLLIAIPSASRAQLNSIYEEVGRFFNEIKILPLMGHI  
VETSGFSGQLRDIQIEDLLARDPKDLDKHVIERFVKGKRVMTGGGSGSELVRQCVKN  
GAKSVVVVDHSEYNLYRISEEFDDSVRKVLASVTNDRDLEDLFRETMPDIVFHAAAYKH  
VRFCELNPHAAVYNNVVGTKNCIDLAIKYGVRKFLVLISTDKAVRPTSMVGSTKRVCELYA  
QNVDPGESEIVA VRFGNVLGSSGSVVPKFRKLIKENKPLPVTHPEVKRYFMLISEACQLV  
LQAASLGKGGEIFILDMGEPVKIVDLARKMLRLAGKSEDQIVFTGLDEGEKLYEELLDD  
KAKDTKYPSIFVAKKTPRDLGKLKKEIDELVTLKEKSQIVEKLGMLIEHL\*

>SPBDM4\_v1\_50257|ID:27158620| protein of unknown function [Uncultured spirochete bdmA 4]  
MNLDETELKLEKLYLSQEDDSPLTQRELAGDTGLSLGMTNILLRRFAERGWITLTHLSG  
KKLRYALTARGMEEIARRSVSYFRRTIRGALLYRERIESYVRHLFRKGYSAVFEQPAEI  
DFLFKSACEEVGIAFYANLSEADRKKLISLERTMVVVEGKQSEDDNGMPRTDDFTESDVD  
MVRLSDILFNDYA\*

>SPBDM4\_v1\_50258|ID:27158621| exported protein of unknown function [Uncultured spirochete bdmA 4]  
MKMTKKIIAWLSAMVFSFVLLAGAGAQTDDQAAIAQALSAMQGGTGGSLSGSLTGTAPTA  
ASPQPTVNQLTAAPSAQVSEAQTPNGQAVGTGQAAGQTAQLSSIEQMFMATMASSLGTPAQ  
NLTQFGYSLFGNPTAPSLAAIGDDYTLGPGDGLVLYLWGDVPDIKELSSSYVLTVDNRGS  
IFLPPVGQVSVWGQDLGTVKDTLKGMLDRRYKRLEMNLTLSLRQFPVFSVGYAGNPGTV  
LANGADTVFTVLSRAGGILKTGSLRSVTLTRQGKGGAERLDIDFYASLLEGKPIDLRVR  
EGDSIFIPGIGSVVALAGELKRPDIYEIKSEASIGQALALAGGALPSVRSVSLVRFDA  
AGKVLRTGDIADKTFELPAGDGFVYFGRVSDLLGQAQVSGAVKYPGRYDVSSFKTLR  
QLLLKAQPLPETNLFYGRVYRIDPSGRDKSFAFSPKDVLASVGGASDAPLTFDKVVLVYR  
YDDTAIDPDFDRFADTVVISGPVKYPGFYLYKEGMRLSELLSNNTLLLDTNHSAELTRR  
TPEGKQEYYTFSPDSVLAGKTDLALARYDSIRFVRRGEQAAGHDFDKFPDAVTLTGNIAR  
PEVYALMGGMKLSQVVVKDQVLLDTNLNYGEITRLRSDGKNEYVTFRPAEVLGSAWDFEL  
ASRDRVNFVKVGYAPERPDFRFADAVEVRGPVQFGGMYAWKEGMGLRELLALAKPLLEA  
NQYYAEIVRGGENGRNEYLTAFPREVASGAFDLALRAKDIVRLYTNMPVGGVAGKAEGSG  
TVQGVAPTGDASGANVPTSTVTSPSAVVPNAAPSSSPLAPGSSVQSGPTTGASVPLVAQ  
QAPQTVSQAASQATVTYGPSDAEKALFNEVTVSGAVRYTGPYARTPSLKLSSVVTAE  
QILEETNLEYAELTRLKADGTPEYHTFAPKEVLEGKYDLPLQAKDVIRFVKKTSFGGTGE  
KPNLEKFSDDVVQLTGQVARPEVYALRPEMKLSQVVVKDQVLLDTNLNYGEITRLRSDGKN  
EYVTFRPAEVLGSAFDLGLGPRDVIRLVKVGYPMAAADAERFGQAVTVEGPVEFAGSYAW  
REGMGLRELLVLAKPLLETNQVYAEIVRPLGGGKNEYVTFAPREVASRVYDTTLKARDRV  
RLYTTIAPKIAFTAQGAETAAPLAGPEAGQSPAGVLPVSGAAAQGSVPGAAAASTPAT  
ATAAPLPAPPSAEATNAISPDGLFLEVTVSGAVRYTGPYARTPSLKLSSVVTDPQILE  
ETNLEYAELTRLKADGTPEYHTFAPKEVLEGKYDLALKAKDAIRFVKKTSFGGTGEKPNL  
EKFSDDVVQLTGQVARPEVYALRPEMKLSQVVVKDQVLLDTNLNYGEITRLRSDGKNEYVT  
FRPAEVLGSAFDLGLGPRDVIRLVKVGYPMAAADAERFGQAVTVEGPVEFAGSYAWREGM  
GLRELLVLAKPLLETNQVYAEIVRPLGGGKNEYVTFAPREVASRVYDTTLKARDRVRLY  
TIAPKIAFTAQGAETAAPLAGPEAGQSPAGVLPVSGAAAQGSVPGAAAASTPATATAA  
PLPAPPSAEATNAISPDGLFLEVTVSGAVRYTGPYARTPSLKLSSVVTDPQILEETNL  
EYAEELTRLKADGTPEYHTFAPKEVLEGKYDLALKAKDAIRFVKKTSFGGTGEKPNLEKFS  
DVVQLTGQVARPEVYALRPEMKLSQVVVKDQVLLDTNLNYGEITRLRSDGKNEYVTFRPA  
EVLGSAFDLGLGPRDVIRLVKVGYPMAAADAERFGQAVTVEGPVEFAGSYAWREGMGLRE  
LLVLAKPLLETNQVYAEIVRPLGGGKNEYVTFAPREVASRVYDTTLKARDRVRLYTTIAP  
KIAFTAQGAETAAPLAGPEAGQSPAGVLPVSGAAAQGSVPGAAAASTPATATAAPLPA  
PPSAEATNAISPDGLFLEVTVSGAVRYTGPYARTPSLKLSSVVTDPQILEETNLEYAE  
LTRLKADGTPEYHTFAPKEVLEGKYDLALKAKDAIRFVKKTSFGGTGEKPNLEKFSDDVVQ  
LTGQVARPEVYALRPEMKLSQVVVKDQVLLDTNLNYGEITRLRSDGKNEYVTFRPAEVL  
GSAFDLGLGPRDVIRLVKVGYPMAAADAERFGQAVTVEGPVEFAGSYAWREGMGLRELLVL  
AKPLLETNQVYAEIVRPLGGGKNEYVTFAPREVASRVYDTTLKARDRVRLYTTIAPKIAF

TAQGAAETAAPLAGPEAGQSPAGVLPVSGAAAQGSVPGAAAASTPATATAAPLPAPPSA  
EATNAISPDGLFLEVVTVSGAVRYTGPYARTPSLKLSSVVTDPQILEETNLEYAELTRL  
KADGTPEYHTFAPKEVLEGKYDLALKAKDAIRFVKKTSFGGTGEKPNLEKFSDDVVQLTGQ  
VARPEVYALRPEMKLSQVVVKDQVLLDTNLNYGEITRLRSDDGKNEYVTFRPAEVLGSDFD  
LDLGRDVRILVKVGYMAPAADAERFGQAVTVEGPVEFAGSYAWREGMGLRELLVLAKPL  
LETNQVYAEIVRPLGGGKNEYVTFAPREVASRVYDTTLKARDRVRLYTTIAPKIAFTAQG  
AAETAAPLAGPEAGQSPAGVLPVSGAAAQGSVPGAAAASTPATATAAPLPAPPSAEATN  
AISPDGLFLEVVTVSGAVRYTGPYARTPSLKLSSVVTDPQILEETNLEYAELTRLKADG  
TPEYHTFAPKEVLEGKYDLALKAKDAIRFVKKTSFGGTGEKPNLEKFSDDVVQLTGQVARP  
EVYALRPEMKLSQVVVKDQVLLDTNLNYGEITRLRSDDGKNEYVTFRPAEVLGSDFDLDL  
GRDVRILVKVGYMAPAADAERFGQAVTVEGPVEFAGSYAWREGMGLRELLVLAKPLLETN  
QVYAEIVRPLGGGKNEYVTFAPREVASGAFDLALRAKDIVRLYTNMPVGGVAGKAEGSGT  
VQGVAPTGDSAGANVPTSTVTSASVVPNAAPSSSPLAPGSSVQSGPTTGASVLPVAQQ  
APQTVSQTAAASQQATVTVYGPSDAEKALFNEVVTVSGAVRYTGPYARTPSLKLSSVVTAEQ  
ILEETNLEYAELTRLKADGTPEYHTFAPKEVLEGK\*

>SPBDM4\_v1\_50259|ID:27158622| protein of unknown function [Uncultured spirochete bdmA 4]  
VKKTSFGGTGEKPNLEKFSDDVVQLTGQVARPEVYALRPEMKLSQVVVKDQVLLDTNLNYG  
EITRLRSDDGKNEYVTFRPAEVLGSDFDLDLGRDVRILVKVGYMAPAADAERFGQAVTVE  
GPVEFAGSYAWREGMGLRELLVLAKPLLETNQVYAEIVRPLGGGKNEYVTFAPREVASRV  
YDTTLKARDRVRLYTTIAPKIAFTAQGAAETAAPLAGPEAGQSPAGVLPVSGAAAQGSV  
PGAAAASTPATATAAPLPAPPSAEATNAISPDGLFLEVVTVSGAVRYTGPYARTPSLKL  
SSVVTDPQILEETNLEYAELTRLKADGTPEYHTFAPKEVLEGKYDLALKAKDAIRFVKKT  
SFGGTGEKPNLEKFSDDVVQLTGQVARPEVYALRPEMKLSQVVVKDQVLLDTNLNYGEITR  
LRSDDGKNEYVTFRPAEVLGSDFDLDLGRDVRILVKVGYMAPAADAERFGQAVTVEGPVE  
FAGSYAWREGMGLRELLVLAKPLLETNQVYAEIVRPLGGGKNEYVTFAPREVASRVYDTT  
LKARDRVRLYTTIAPKIAFTAQGAAETAAPLAGPEAGQSPAGVLPVSGAAAQGSVPGAA  
AASTPATATAAPLPAPPSAEATNAISPDGLFLEVVTVSGAVRYTGPYARTPSLKLSSVV  
TPDQILEETNLEYAELTRLKADGTPEYHTFAPKEVLEGKYDLALKAKDAIRFVKKTSFGG  
TGEKPNLEKFSDDVVQLTGQVARPEVYALRPEMKLSQVVVKDQVLLDTNLNYGEITRLRS  
DKNEYVTFRPAEVLGSDFDLDLGRDVRILVKVGYMAPAADAERFGQAVTVEGPVEFAGS  
YAWREGMGLRELLVLAKPLLETNQVYAEIVRPLGGGKNEYVTFAPREVASRVYDTTLKAR  
DRVRLYTTIAPKIAFTAQGAAETAAPLAGPEAGQSPAGVLPVSGAAAQGSVPGAAAAST  
PATATAAPLPAPPSAEATNAISPDGLFLEVVTVSGAVRYTGPYARTPSLKLSSVVTDPQ  
ILEETNLEYAELTRLKADGTPEYHTFAPKEVLEGKYDLALKAKDAIRFVKKTSFGGTGEK  
PNLEKFSDDVVQLTGQVARPEVYALRPEMKLSQVVVKDQVLLDTNLNYGEITRLRSDDGKNE  
YVTFRPAEVLGSDFDLDLGRDVRILVKVGYMAPAADAERFGQAVTVEGPVEFAGSYAWR  
EGMGLRELLVLAKPLLETNQVYAEIVRPLGGGKNEYVTFAPREVASRVYDTTLKARDRV  
LYTTIAPKIAFTAQGAAETAAPLAGPEAGQSPAGVLPVSGAAAQGSVPGAAAASTPATA  
TAAPLPAPPSAEATNAISPDGLFLEVVTVSGAVRYTGPYARTPSLKLSSVVTDPQILEE  
TNLEYAELTRLKADGTPEYHTFAPKEVLEGKYDLALKAKDAIRFVKKTSFGGTGEKPNLE  
KFSDDVVQLTGQVARPEVYALRPEMKLSQVVVKDQVLLDTNLNYGEITRLRSDDGKNEYVTF  
RPAEVLGSDFDLDLGRDVRILVKVGYMAPAADAERFGQAVTVEGPVEFAGSYAWREGMG  
LRELLVLAKPLLETNQVYAEIVRPLGGGKNEYVTFAPREVASRVYDTTLKARDRVRLYTT  
IAPKIAFTAQGAAETAAPLAGPEAGQSPAGVLPVSGAAAQGSVPGAAAASTPATATAAP  
LPAPPSAEATNAISPDGLFLEVVTVSGAVRYTGPYARTPSLKLSSVVTDPQILEETNLE  
YAEI  
TRLKADGTPEYHTFAPKEVLEGKYDLALKAKDAIRFVKKTSFGGTGEKPNLEKFS  
DDVVQLTGQVARPEVYALRPEMKLSQVVVKDQVLLDTNLNYGEITRLRSDDGKNEYVTFRPAE  
VLGSDFDLDLGRDVRILVKVGYMAPAADAERFGQAVTVEGPVEFAGSYAWREGMGLREL  
LVLAKPLLETNQVYAEIVRPLGGGKNEYVTFAPREVASRVYDTTLKARDRVRLYTTIAPK  
IAFTAQGAAETAAPLAGPEAGQSPAGVLPVSGAAAQGSVPGAAAASTPATATAAPLPAP  
PSAEATNAISPDGLFLEVVTVSGAVRYTGPYARTPSLKLSSVVTDPQILEETNLEYAEL  
TRLKADGTPEYHTFAPKEVLEGKYDLALKAKDAIRFVKKTSFGGTGEKPNLEKFSDDVVQL  
TGQVARPEVYALRPEMKLSQVVVKDQVLLDTNLNYGEITRLRSDDGKNEYVTFRPAEVLG  
S  
AWDFELASRDRVNFVKVGYAPERPDFRFADAVEVRGPVQFGGMYAWKEGMGLRELLALA

KPLLEANQYYAEIVRGGENGRNEYLTFAPREVASGVYDITTLKARDRVRLYTTIAPKIAFT  
AQGAAEGRMAPGGLEAGQTMMPGAAPGAATGQAGATAAAPVAAPTIAPSAPNGAAGPGA  
TAASAGTAPAAGATSIETDTGLYLEVVYTSGSIRYEGPYARTPSLMLSSVVTSQILQDT  
NLDYAELTRRKADGSWEYLTFSPREVLGKTYDIPLRAMDSIRFVVPVKYLPEKIDFDKFGN  
AIAIEGATNFPGLYSFSTPQMLSEILTSQQLSTTDIFYGEIERWQASGRIGYLTFSPLA  
VLQGYQDIQIYPRDIIRFVTAGDTGENHDFSKYPDVTLLKGSIRYPGRYAWYKGMKLSDI  
LQESDLLIDTETS YAEVRRYSATSDSIINFAPGQVIARKTEVELQPRDVTFFYPRYYQKP  
ISIAGEVADPKVIPYYDQIELSSVLRVTLQLSLMDLKAIEIKKTTGETTVVYLEDYLKRQ  
PNSKVLLSPGDAITIRTLTPDEHLPVIVVRGQVRQPQTIAFSEGMRLSDALVAAGGYDST  
AYPKGLVLIRKSVATAQQTQVDRLIAQLEAATLAGTSLPTSTDTLNSASAVIANMQIEL  
AIQKAKLGNLKQLYKEGFGRISLEIPDSLEALAGSLSDIRLERDDLIYVPKVPTYVVLVSG  
EVSSQNVVLYREGMTVRQAI A ESGWMSG EADLSHAYIIRASGKLDSTEGKGF LFFRPNIL  
NYTLQPGD TVFVPTKSAKVSVAWAYMRDTFVSIGSILTSALTAKTLLGL\*

>SPBDM4\_v1\_50260|ID:27158623| protein of unknown function [Uncultured spirochete bdmA 4]  
VAEKNENSDEISFIDL VATIWRQKWL VIVVTVLA AVL SVAYALMQPNMYTATSTVLPISG  
SSLLSQYAGLAAMAGVSLPGSDSSNPSVKIQAILNSRELAVKVINELDLVPKLIKEPEK  
LKDVSPATAV GIFQKSVFSVSVDSKTS LMKVSAKTKSAALSAQIANT AIDLLQQDLSSR  
VLTASGKNIVVLEQQVADQEKKVRELQSKMEDYQRKNKL VAPATQSQQGLDLYRSLIQKQ  
ITLEIQISSLQNAL SADNPKV TAAQAQLAAIQKQIDNFERTGGGVG PSMNETPKALMEYA  
NLQAELELATKIYGGLT SLENLRLQDATDKVFVEVIDTAVPPEQKSEPSRSMICVVGTL  
AGGLVGLLLAFLREALQKVIADPEVRAKFAKKKEM\*

>SPBDM4\_v1\_50261|ID:27158624| ytfG| NAD(P)H:quinone oxidoreductase [Uncultured spirochete bdmA 4]  
MIYAVTGSTGAFGSLVIQRLDFKVPASSIVALVHNQSKTAHLVNLGLETRLADYDQPST  
LDRALQGVDRLLL VSGSEVGKRLRQHTN VISA AAKKAGVKLLVY TSLSHADTSVSPLAPEH  
KGTEEFKTS GVPFVILRN N WY TENYSTDLKQARTTG IIEAAVGTGKVASASRS DYAEAA  
ARVLIGEGHAGRTYELAGETWDYNALAKAASEVLGRP VVYKTVNAAQRTQSLMAAGLSQD  
AAGFVVALEQSIEAGSLAQAGEDLEKLLGRKPKSLTDGLKASLELT\*

>SPBDM4\_v1\_50262|ID:27158625| protein of unknown function [Uncultured spirochete bdmA 4]  
MLSQTLKVLEKEGLVHRQEWDGKPPRVEYSLTESGQRISKLAWALSGFLRVASPDFGEDK  
SLARIKRS\*

>SPBDM4\_v1\_50263|ID:27158626| exported protein of unknown function [Uncultured spirochete bdmA 4]  
MMVFSLSIRRFKLC TLAALMALLA APLAMFAQERAPASDGLSRVALVIGNGN YEGTTKLN  
NPGNDATDIGDMLSRLDFD VDLTDADLYTMEDAVLRF RDKLS DSPDSV GFFYYAGHG VQ  
SNGENYLIPVDARLNSESLRTRAIPLQFVLD SLGEARNRLNIIVLDACRDN PFSWARSG  
ARGLAVVGQLPPASIVVYSTSAGKVAQDGTGRNGAFTEELLKHLPTPGLDITEVLRRTGE  
GLQKKT DGIQIPAIYSQFFGFLQLAPGEGAAGTGAGSGPENGS SLDYLPAFFDEAPMDAK  
LVIAHAEELTDWGLWLSAWNVLAKVDPNDRDPYILAEKIRTVLDGNTYTDLYQGFWLADL  
PPDGDA DAAREAGTLDEEYFAFDVHMAVQRMLDRGVEIPPVLASALGDFYYGAYDYCGDG  
YVLSAEDTKAEALRWYDMANENYILVDLVSILHYAELLIDAGRADEAVAVLKDETEWEAD  
DAGLRLRLV DAYVVTGETDS AFAELDGLIQR AASKDEARDY YAKAIDIAFDQNNRQALDR  
YLAAMEANYPDDWLAGLTRHKVAVRAGDNASAQNIADDLLTKFPLHTNVLEGLVLTDWLEN  
PAGADGGLAFLNRWIGKSKNDALALGVFYLYRSLYRYYSIESSPSSSLKSSIQNALADL  
DSAEKLLTQSPDADKTTVEAIQYIRKELQDALEQ\*

>SPBDM4\_v1\_50264|ID:27158627| ADP-ribosylation/Crystallin J1 [Uncultured spirochete bdmA 4]  
MREQKSAGGRPMQDLSGPPREFSPELLRGILTAYSVDAMGMPTEFMTRPEIRAKFGLV  
DRLLEPSESQNHPNIPRASVTDDTEQVCALLEEY AERDRVDARDTALRLLRWMRESGAIE  
KKYIGPSSKTALAEIEGGAAPEDAGLGGTTCGGVMRSPA AVLFAAIRQKPLAECVRACLL  
PTHNTHLALAEALGYAYALRAAMRGESVGQILDEM ETGAAEGARLAPYPMCGPSLAARVR  
HFMARQFQAQSASFSGADEVLD FFIY NVYGTTLASVDVASAALCIFLAARD DVWLAI RMGA  
SIGGDTTIAALEGALSAA YALSHDRAINIPRAIVREVTEKNKLD FDSLIERLLA\*

>SPBDM4\_v1\_50265|ID:27158628| Xylose isomerase domain protein TIM barrel [Uncultured spirochete bdmA 4]  
MVDTVNRYSFSTAALYPRSASESLRLIAGAGFPHAELMPQCFADASESFAREAERIDIHV  
ASVHYPLAMFMSLYNASPGMVAEARAFGVGLVRLCKLLGAEVLVIHPHEVQQDPRLKELI  
EHPIRGNILHLAEQCDKAGVLLVMENSPKGVGRTPEGLLSYIESLGAPLVRPAVDTTESC

ESDIDPAEFIKKAHPAHLHLSDHSGDKKHIPAGEGDTNWRAVAALDACGYGGYYTLEPL  
YRYYLDPNPEEKLARAHAFISGLIGD\*

>SPBDM4\_v1\_50266|ID:27158629| Extracellular solute-binding protein family 1 [Uncultured spirochete bdmA 4]  
MKKSVMICVAMLALVAVAIPVGAQTCLKVWFVAVSGDSGEAFKALLEKYKVANPDVALDYS  
YSGNYGDTATKVSAAALISNTAPDVALMAAGPLYTGARNDFFIETKLNADLNKDDIYPGV  
WDYAKYNGRVCAPVYGYSTPVLYYNKAILAKAGIDIKNPPKTWAEELLQLAKTAQAKGNVS  
GSPDFWGFDA TDVAWLFKTMLYQNENTVISVKGTKISPAFNDEKGVVADFVWKKLTDEKV  
MPVGQHSNAEKKFLAGNLAFLVATSARIARWSSDPSLQIGAIKMPYFKRPSVALGGNVLV  
ILSKDQKTKEAAWKLVKFLASKENQTFALKTGYLPIRKSGLSLPEAKEAVTSNPMYAIA  
FDQLDTSWSYWHFEQMGTM DQLLAQAIDALERNVLT PKATLDKAANELQAEIDG\*

>SPBDM4\_v1\_50267|ID:27158630| Binding-protein-dependent transport systems inner membrane component  
[Uncultured spirochete bdmA 4]  
MSKHLSRYPFTTLFLFISAALMIFPFAWMLLSAFKTPADVYNYPKWPSSFKFTNFAE  
VFKKIPFIRFYANSIFVSVVQTVLQIWISAMGAFAFKLDPLKKLFAFMQSSLFVPEI  
VTIPLFLLAAIAGLVDTYTG LIVAELNCAFTLLLSFFQTIPNELIDAAKVDGCGYFR  
VFLKVLPSKTAIGTASLFAFLTHWRSYMWPLIITNNV KMRTLPIGLKYLVTETGTEYQ  
VLMAASLMAIVPVLVYVMFMEKEFVQSITLTGLKT\*

>SPBDM4\_v1\_50268|ID:27158631| Binding-protein-dependent transport systems inner membrane component  
[Uncultured spirochete bdmA 4]  
MVMKKKEATKVYSLKKEQ RAAAVMMTPLLITLILLFLLPVLLVLIMSFTNWSMTTTRS  
YVGFRNFLFVLNDCRFWNAFGNTL FYTG IKL VADTGLALFIAVLLDKKIHFRFFRIAHF  
APVVVPITASSLIWLWFYDPGIGPLNQLSWLGLPSMQWLYSEKTALLSVILFSVWKGLG  
YNVILFLAGLQSIPESYLEAARIDGASERQVFRKVKLPL LAPITSFIVMMGIINCFKVFT  
EVDVMTPNHGPLESTLLMVSYYDQSFTRGKMGRGAAAAILFLIIFVFTMLQRRLGRKE  
VSFD\*

>SPBDM4\_v1\_50269|ID:27158632| protein of unknown function [Uncultured spirochete bdmA 4]  
MKVGVIIGSASGKGSAREVITSLAARLQSCVAVCGGAFGCDGAFGCDELPPSWSRLSPG  
LAGALPQAEGYVENLRKTVASLLGWGSDALICVGGDGLASYVLDAMAGLGKKVPLLGIAS  
GTINVGPPVAFKTEDIPTLDISRLPLRSIDAVEVLVDGRHLAYALNDVVIGNSFLGTAGG  
EVVNLSTRVLLRSGEKLIKIDPSPHIAGAAFRLSKNGAPVATSMAQPAQIIVSPLGKREFF  
GRAIAGVLCNAAFMDGAAALGLFDTVLVKASRPSRFGDTARSEHLLFEKGRLEIVGLA  
DDADIIVDGNPYAREG\*

>SPBDM4\_v1\_50270|ID:27158633| protein of unknown function [Uncultured spirochete bdmA 4]  
VKKGFYDIVIIAVNKIELVSEYITLTS DAGTVLMFSGLSKDEFVSVEAYSIHYRQVSLKG  
SFGYAMHHFKEALSLIDAHKEMFSRIITHRYPLERGKEAFDLLASGDALKIVLKP\*

>SPBDM4\_v1\_50271|ID:27158634| Alcohol dehydrogenase GroES domain protein (fragment) [Uncultured spirochete  
bdmA 4]  
MKALMYNGIGQLALQDVPDPESDFVVKVLGCGICGTDLKTYHKGHHLFPPPAILGHEFYG  
LVDKAPRVCYSGDMVVVAPYAECGVCDVCQRDAGSLCSHNHYVEDGAF CERVGISLDY  
IGRGVFPLKEYYDVYTLVDPLACVLNGVEQLNLKPTSRALVVGAGPMGTLFALLFSARGV  
PVTFFDPAVQRCYSIASWGIETCEPC\*

>SPBDM4\_v1\_50272|ID:27158635| Transcriptional regulator, DeoR family [Uncultured spirochete bdmA 4]  
MKTGPDISTYRIARYYYADGLSQEEIAAKEGFSRSQISRLIDCAIVLGLIKITIVPPAS  
QHTEELSEMLVEKGLRTAIVVPVRKSSPQEEITKAIATRAADFLSEELPSFKVVGIGWG  
KTVYETAMLLPRRAEQAAKPFVPLIGLSGDTNPNLQINTIIDRFSTSFQSRGLFVNLS  
VRDKGSALS GIEEQRIHALRDYWSQVEVAVVGLGTPSSVSLIDELPERYKDELKKSAS  
CGDILAQFFDEKGTIFHSEHEYDLLAFDIYGLPCLRRSICLAGGELKARGIIAAAKARFI  
SDLITDEQTAHTILKFLREHSSAARYGAAAKGERA\*

>SPBDM4\_v1\_50273|ID:27158636| putative Fructose-bisphosphate aldolase [Uncultured spirochete bdmA 4]  
MTDGLIRNTEKLFDEHGHTFLLALDHAQSGVMPGLEHTPALLSALADAPLDGFILNIGLA  
AHLARAPFLRKKLLLRSSLGGSNLADAYAPAHLNHVSPETSLAAGADAVLMMAVIGGEDY  
QSLQTLAADIDAFHQYSIPVVVEILASDFSKTATFDVQYHGARIAAELGADAVKAFYVDN  
FEKVVDCCPAPLILAGGPKDRDINAVARHAVECGARGFAFGRNIFQASDPLAIIQSLREI  
LG\*

>SPBDM4\_v1\_50274|ID:27158637| putative MlrC domain protein [Uncultured spirochete bdmA 4]  
MRIVVGSFQESNTLVSRKSGREDFDIFRGEEMLSHISVTDYFASMEAEIVPTLYAHAVP  
GGCLRETDFLAIARDLISCIPSQGIDGIWL YLHGALEVENLGSSELALMRMIRRKVGGDDV  
PIALALDFHANNTAGLMKLVNVIAGYRTVPHRDMEETELRAAKLLVRCIEGHFLPEPQMA  
RANVVAPGDCVLTDEPPLKEIIAEEAALEKTPGMLVCNVFNGQPWVDSPTMGPMSMVCIEH  
RDKAAAKAAAERLAKMFFEARHEFKFSVDACEPGEALNKAWAENRRPIFVTDSGDNTTAG  
SSGDNAFLKLAQEKGMRGILIGGITDSPA VVQCSNIRQGSVEFDVGGSIEPSSKTHI  
RGELLYKGDVEGWYGENAGPCVVVRSGGIDIVITARSCAFTKPRIFEGGLDIMTYRFVV  
IKLGYLYPDLAAVAARAILAFTTGSSTERLQDMGMKRIRRPMPFLDDNFTPVFD\*

>SPBDM4\_v1\_50275|ID:27158638| putative Ribose transport system permease protein RbsC [Uncultured spirochete bdmA 4]  
MNLQKANRTSPLQILFDQTVLFI LFGFTIFMAFVKPSFLSWWNIQNVLIDVSIYGVVACG  
MTILIISGEFDLSASSQYMWAQILFVSLNMTKNPFVSIITLLSGFILGTINGLIVTKL  
HINSFITTLGTMTMIRGLCLVFTSGKMVSTDNSFMKAAGSFEFLGLSSFFYYIGVLLIL  
SIILAYTNFGRRFYATGGNLDVARLAGINTSFQKTA AFSIMGILCSIGGMMLVVQLRAGS  
TQYGN DIALSCVAATVIGGTRLSGGAGNALRTALGMLVIVMLYKALVYLG FQAYYQNLVK  
GLVLILVVMFDL FMSRRGATAR\*

>SPBDM4\_v1\_50276|ID:27158639|rbsC| Ribose ABC transporter permease protein [Uncultured spirochete bdmA 4]  
MSGKPEIENLKARIAKLLRSQGV LIGLVLIIIVASILEHSFLTASNLLNLRQSSALGIV  
CLGVTFVMMTGMDLSVGSIVSLCAVVAVSIMNRYGQGSNSNGTALLAILATIVIGFLVG  
TINGSLIVMFNGRLGETFIITYGMEIVVAAIALLYSGGQFMAGTFAPGLYEWLSSGTVP  
IIFLALAAIMHVLLAHTSF GKQVSFIGANMDCARMSGIKVSGIRVLVYGMCGVCAGLASV  
IVTSRVYSASPLQNGYELDAIAAVMVG GTSQTGGTGGIINTILGVLVLSVLGNALNVIG  
VDANAQLLFRGAILAAVGLDVWNKNISMKEAAK\*

>SPBDM4\_v1\_50277|ID:27158640|mgIA| fused methyl-galactoside transporter subunits of ABC superfamily: ATP-binding components [Uncultured spirochete bdmA 4]  
MGQYILEMQNITKIFPGVKALDNVSFAVRRGEVHGLVGENGAGKSTLMKILNGVLAPDSG  
NILVDGRPITFKNTKQAQACGISLIYQEFNLVNTLSVAENIYLGFLQTDRAK FVDWKKVR  
TEASELIKRLGDFDNVREKVENLSVAEKQLVEIAKALSLNAQLIAMDEPTSSLTANEIDK  
LFYIIQGLKERGITIYISHKLDEVMAICNNVTVLRDGRIIDTKMVGETN NPEIISKMVG  
RPVEMAYPRRPLATNSEVVLEVRNLSCAGFVKDISFTLRKGEVLGIAGLVGSGRTELVEA  
IFGARHVQNGEVFVHGHRTKIRSTADGKRCSIGLVTE DRKETGLALGYNVTDNIITNLQ  
KVRAGLLVSKNLIQSSVGRYVDDLGIKTPSIRQTVVNLSSGNQKVV LAKWLFSDVEILI  
LDEPTRGIDVGAKYEIYLLMNALVEKGKSIIMISSELPEVLGMSDRVIVINEGRKKGELQ  
GQAMTPEAVMSIAIQ\*

>SPBDM4\_v1\_50278|ID:27158641| exported protein of unknown function [Uncultured spirochete bdmA 4]  
VKKVVVLMALTI AVGAGFAQGTKPLKKIILSNAYYTAPYCAAFNPA AIAKAKELGYDLQ  
ILDGEGNQKQMEQARLAISEAAGFIYFPADVAGSVPIVEALNKAKLPYVIVNNYTL DAL  
KANNVPCYVGTNVKQHGHNMATLVKQLLPSGGNVVAIEGTAGHAQTIAFNEAFDEDFKGT  
NIKFLDKPADFDADKALNKMNDLLTKYGNKIDVIISHDGGMLAGIISALRAAGKLGKIP  
IVCAGSNKIIYDAIKSGYVYGTSTQDPGVEGALAVSTLIDIINGKKVPQWVELPIK PATK  
ATIDNYNWF\*

>SPBDM4\_v1\_50279|ID:27158642| conserved protein of unknown function [Uncultured spirochete bdmA 4]  
MSIGKKRWVFADGDLPPMPEGLDGPKAHEALMVVNNGDEEARLSVTLLFEDSEPKKGFVL  
IVPPRRVKCFRMDQPIWGTDYVIPFGQYAFIVESDVPVVA VFGRLDRRPGMAYYPVAPFA  
E\*

>SPBDM4\_v1\_50280|ID:27158643| conserved protein of unknown function [Uncultured spirochete bdmA 4]  
MAYFDLNETKARLEKVRAILRNKQLDAALIYYDELNVANGWYLTGWCPQFEKGCILVPAN  
GEPLLGGPESEPFAMSSAIPDTRNFPPFMVPDEEYPNAKISTFAMLSEELEKKKLP MN  
TIGIVGTASLPHKVYEQFVAGFAGIHLVDITDEYERLRSVKSPWERTNIRKSFGLTYKAY  
EVMKQKIAPGVIEYEAAGEYVCRKAGANNFAFSCIVGSGERSNAVVP TAWNREMKAGE  
LVMIGIAPRFSGYAGVMGDTLPVSRTYTERQKECINHLREAFRLTRAMLKPGMKGREIDV  
PARNYFVKHNLIQYL VCPFAHTIGLMEAEAPFFGPN SDDVLVPGMTVCVDVSFFGHPEFH  
GARIETGFEITENGCTPLCPENDLFSQNLK\*

>SPBDM4\_v1\_50281|ID:27158644| putative Ribose operon repressor [Uncultured spirochete bdmA 4]  
MKPKRITIKYIAGQANVSFSTVAKALHNDPVI NEKTREKVQKIAKELNYRPNVLAKGLRN  
SKTKTIGIILNDLQSPFYSEIYKAIGNVINKRGYTMLLSDSSYDEELEMKNVSTMISQGA  
EGIIISPVTRDSASIRALIDDPIKAVFIDNRPSNPINC VYVDHEEA AKIATEYLILAGH  
RNILLNGPEHLPSQDFRKG YVKTLIFHGIEVDERLIKNNPISIEKTCIQMRAIFSGED  
LIKRNEFTAIVCLSDVIAIGVYESALQLGFGIPDRYSLIGYDNILATKYLNPPLTTVHQP  
KEQTGLYAINLLLDEIENSHNEHRQIILNPVLINRASVRDIRQSL\*

>SPBDM4\_v1\_50282|ID:27158645| putative Transcriptional regulator, LacI family [Uncultured spirochete bdmA 4]  
MTVSRVVHGGTSVKEETRKRIVEAMIRLGYVPSAAAQALRSNKDLTISPSSLFALIFGSG  
TEYSVSFFHDITRGVEKA ALELKLCPVYISYKDM EELWMRLQGLFSAYSLSGALLVGQF  
TPEIIQFIRENVKNIVMVDGPAQSGEGIGVVESGNMEGSL LALDHLISLGCRKIKIITVE  
QNHYFARAMTMAAKIRRSKDV DIELWYNCD SCEKAEELVMTNWNNGNHFDGLYSNDDFAI  
GAMKALQTLNIKIPKDVKIVGFDDILYASFTVPLT SVRIDKYLLGSEA VHTLVAISKAS  
NKAENITKVIRPSLIIRGSA\*

>SPBDM4\_v1\_50283|ID:27158646| conserved exported protein of unknown function [Uncultured spirochete bdmA 4]  
MRRKGLFLLIVLMIMLIGVTNVFGQATKPQDTQTVGPQGEKPTWYSDLKLTDAEKETIRK  
GHYKAAAYLLHTTSDFTNALLAGAKAAFKDLGIDL VVTTDAAMDSTKQKTDVETALALKPD  
IILTLVIDPVSGAEAFRPAVQRGVKLVFMSNLPVGYVQDRDYVSIVTDDLYGMGKAAAEM  
LADSMNKKGNVAWLYHDADYVVTNQRDKAFKSVIQSSYPNIKIIAEKGIANPADAESIAS  
ALIIQHPEINAFYVPWDTPAEGVVAACRAAKRPDIKVV TLDLGANGLDMVKSGNVIGIA  
ADLAYQLGYTKAICGAYGLLGKKAPAFVIVPAIKVTKKNIVEGWKQSLNVEPPKEIMDFL  
SKK\*

>SPBDM4\_v1\_50284|ID:27158647| conserved protein of unknown function [Uncultured spirochete bdmA 4]  
MVLDSPVLEAVGICKAFNKVSVLSNVDLRLYPGQVHAI VVGQNGAGKSTLMKILNGVYRKD  
SGEIKINGQSCSYNSHAEAA RQGISMVFQDFSLVPSMKVYQNI FLSQVMSRKGGGFFDER  
TMKEKARELLKEVGVDINIDVEDLVENVS VGSRQLVEIAKALCLESKILIFDEPTASLST  
AEITRFFTVSRLKSRNVAIVYITHYLQDVFKICDSITVLRD GKVSLDDAIANVDMGKVI  
HAMTGKVISVEKSARA AKDSSQPEVLRLESVSTKKIQNMSFTLRKGEILGLAGLLGSGRT  
ELLRALYGLDKIISGEIFVDGKR VNIHATRDAKKSRIALVPEDRRTQGLIMDFSLYDNIV  
VGVLPMLTRHGFVQKSKGESVARSYISDFKIKANGISD GVRFLSGGNQKQVVI AKNIADQ  
PEILLDDPTFGIDIQSKTEIMEIIRKYVEQGNAA ILSSEFNELIELCDRILIIKKGTI  
SQELEVSAQSAEEALLQLAQ\*

>SPBDM4\_v1\_50285|ID:27158648| conserved membrane protein of unknown function [Uncultured spirochete bdmA 4]  
MKRFFHGISVGKIKNYIVYISFACIFAFFAIMLANRGFLTGANLMNIARQTTMISVMAVG  
MTFVLSAGEIDL SIGSIVALASLTTALGLRNWGLIPGIVIGLLTGFVFGTINGL FVAKIG  
VPSFLVTLGMTGIITGLARWITNLQSVPIVNDTYNFIFGSGDIGPVSILFIWTVVLLVIG  
QIGLKKTKFGWSTLAVGGNKVSANYSGISVNGIKMKVMVLNGVLAALAGMLYAGRLHGAR  
YTLGETDLMTVIAAVIIGGTSMAGGKGSVIGSVVGSII MGMINNGLILMGLSVDQQMIFR  
GIIIVAVSLTMGEKQS\*

>SPBDM4\_v1\_50286|ID:27158649| conserved protein of unknown function [Uncultured spirochete bdmA 4]  
MGDQNRISQKAHARYREKAFSKKTRIAVAIAPLIGQYPLEIIRTAIPGCLLLPLPFENFE  
ASMKDGNI EADLAVCIEDKDGLVPEGAFSVKTGLDWGIPLVVVSGAGVAGAIYGVRELFE  
RQIRKNADGGFILPSLEIEEAPGLPYRIFWTWDHSTN WYLNQTGLQDIGAMNYLKP KSG  
FLEDYKRLVDFMSKNRISAVTIYGFLRDNHGGVEAAKELCMYASQRGVRILPGVGINAYG  
GIYWEGESPYNLSNWLRKNPRLRAKLGTRAAFHADIPEL WFPENQYIDAACPSKPENAA  
FHEDAIAWLAETFNIGGINFETGDYGTCHCDECTARRKENTTWSFGDMALLYPRLFSAAK  
RSGRDLWLVEAYWDTILDARSLAPLSSLPDEAIYQYCVNRSYWPRLRNELTKEYVK TLP  
RSKNIFRTHMGSQWNGERYSLVADR FANMASLAYQTGMKGMTIFGEVSSFN PANEINYLA  
FSRFSWNPLLGWDDFLRNDLAPILGGVSEAFKFLELLEVKEDRASLLRALNEAREIARLT  
NGDVYRRWVQLQDRLYMKSEMLGTA\*

>SPBDM4\_v1\_50287|ID:27158650| conserved protein of unknown function [Uncultured spirochete bdmA 4]  
MKTLQDCLREEKIEVDEAIIATIASMDIEHKAGQLFMLAFGGDDPKRACRMIENHYLGGC  
YISDANASTPEKAALLSSALQRCAISSSGIPLLLGVDQEGAWGVMMSASTTGPGNGLGGA

THDPGLTWAMYGVIGEELEAVGYNTLLAPCADVNSNPANPIIGMRSFGGDAAEVARHVKA  
AVHGASETGVITTVKHFPGHGNTSEDSHRGIPRVDRDMKTLFEVDLAPFAAGIQAGVDIV  
MTSHILYSAIDPAMPATLSRPVITGLLRGQMFGKGVVLSDSMNMRAMRRSYEPGRAATLA  
LAAGVDMIMLAEHYDHDAEKYEIVQRATIQQVIDAVKEGYLEESAVIDMAVYRILKLKKR  
HGLLGRQNFIKPKETVGSQAHRAVEEAVCSR TICVMRNSNECWIPLPDSSVALVRVVPAS  
AYAILTSTRGIGPNQEVSAFDTFRESFLRIHATTRVIDFYGERNSMPVDLSILEKFDVIL  
AVTEDYPLPGVDFDTASQKRAVLRSLGKFGHKLAVVGLRTPYELAEYPKVKAYVCSCSSR  
PCAAKAAAYALLGIVEAVGISPV\*

>SPBDM4\_v1\_50288|ID:27158651| transposase (fragment) [Uncultured spirochete bdmA 4]  
MLPMVLGYVEGVTHDYIRHGTITLFTALNVLDREVLAACKPRHRHQEFLSFLRNVENSVP  
PDLDIHMVVDNYVTHRHPKVKAWIAARPRWHVHFITYSSC\*

>SPBDM4\_v1\_50289|ID:27158652| transposase (fragment) [Uncultured spirochete bdmA 4]  
MVLGDGASSHRSKDLVIPENVALMQLPPYSPELNPTAQIWNILRRSYFANKVFDSLDAATT  
QAESEGIYLSAQILHRFE\*

>SPBDM4\_v1\_50290|ID:27158653| conserved protein of unknown function [Uncultured spirochete bdmA 4]  
MTLHQKIVKPKVWFLELGKQLRNVAEECRIMGYSRDAIEETLIEMTFEYPAYGQVRVSN  
ELRKEGIFISSGRVRCVWRRHDLEVFQKRLTLLEAKAARE\*

>SPBDM4\_v1\_50291|ID:27158654| protein of unknown function [Uncultured spirochete bdmA 4]  
VYQQTYLDTYCNIAIAKLYTNKTPMAADLLNDRVLPFYANMRYHSEFYQVAFRKKVYA  
SLES\*

>SPBDM4\_v1\_50292|ID:27158655| Threonine synthase [Uncultured spirochete bdmA 4]  
MDFICSRGKAPVTTREALCECGGLWKLDFQPPLFDPDLDRREWSLFRYRAFLPLEEL  
EGAKEENAADTRGPARAARAQHDGWRAVSLGEGMTPIVRLDEDEALLKMDYFMPTLSFKDR  
GAAVLIHCRAIGVDSVIQDSSGNAGNSIAAYSARAGIQCEIFVPEGTSPAKIAMIRSHG  
ARVTIVPGSRDQCAEACRAKVAQEGIIYASHVYNPFYEGTKTYIYEVWEQLGRIPAHLF  
VPLGNGTLFLGMVKALEELLAADI AKMPQIIAVQSEHCDPIARAYEDGATSPA HITPLP  
TLAEGIAIGGPMRGEEILDYIYKYKMKVITSPE SRILEARAALAGRGYCEHTSAATYAA  
YLAWCEKHGRTYDSLIPMCGAGLKSDQ\*

>SPBDM4\_v1\_50293|ID:27158656| exported protein of unknown function [Uncultured spirochete bdmA 4]  
MRKSYVRVMERALLLAVALLVSACSASIQNMSLEQPHNSDAESKAVELTPSDPIEYDTSM  
PSLPVLQSVGSGTAAPVLILYHNITTLTDPGTYDRRLQDFDNDLKYLQDNNITIIRLPD  
ILKIQSGEIVPQEQRF AVITFDDGYVSA YARAFPILKKYNMPATFFIITSFVGTSGYMT  
WEEIEEMASYS PDNGRQPL YEFGSHTVDHRS LA YDASAFPDRNDYIMFLNMEMNQSKNAI  
LQHV NQTDIFLALPYGDGAYEQEVTYAAIRTG YTG LRTSIYGAFDA YNTNWN YHLPSLAI  
LGSTDIGVLPDYEEQLLPETGMLMLSVR\*

>SPBDM4\_v1\_50294|ID:27158657|bfr| Bacterioferritin [Uncultured spirochete bdmA 4]  
MKSDKRIIDALNGLLADELTA INQYMHSEMCD DWGYEKLHKNFEKRAIDEMKHA EKLIG  
RILFLEGTPIVSELKKINIGSSVDKQLANDHAAEEIAIKGYNEAIALVAGLKDSATRDFL  
QDILNDEDAHMDNIEALQSEIEQMTLPTFLSTQVEK\*

>SPBDM4\_v1\_50295|ID:27158658|uxuB| Uncharacterized oxidoreductase UxuB [Uncultured spirochete bdmA 4]  
MTVYLHGNTAVVTGGSGVLGSAMCVGLAKAGA QVAVLARGLEKAQHLVDTIEAEGGTAMA  
VSCDVLDAEAVA HSAELVTKTFGRCDILLNAAGGNNPKATTIKERLDAEDIERIMSPATG  
NREQSANASTFFDLDPDGVRVFDLNFMTGFIPTQIFASHMMGMSVATIINMASMGSYAP  
MTKVPA YCAANA AIVNLTEWLA VHLAPAGIRVNAIAPGFFLGEQNRLLQ NEDGNLTLRG  
QKIIARTPAGRFGVPDDL VG TLLWLCDATASGFITGTVIPVDGGFNAFTGI\*

>SPBDM4\_v1\_50296|ID:27158659| Mannonate dehydratase (fragment) [Uncultured spirochete bdmA 4]  
MGRIPFAHVRNMHTSGQGSHTTFYDAQHLSSMGSLDMYEIMRAYSDIDFEGYIRPDHGR  
MIWGESGSPGYGFYDRALGVSYLLGLWEALRKGKGMRA\*

>SPBDM4\_v1\_50297|ID:27158660| Mannonate dehydratase (fragment) [Uncultured spirochete bdmA 4]  
MNMVFRWFGEGFDPVPLEYIRQIPGVSGVVPMLSDIPAGEVWPLEKILAMKHRIEAYGLA  
MEVIESVNVHEDIKGLPDRDQYISNYFATLENLGKAGVKVVCYNFMPVFDWVRTDLSHT  
LDDGSKVLYYDSAFVDGVDPEAF AKRFNAGSNGFSLPGWEPERLET LRRLFEQYKGMPEE  
ELWRNLEYFLKAVIPAAERAGIKMAIHPDDPPWSVFGLLRIKNE\*

>SPBDM4\_v1\_50298|ID:27158661| Oxidoreductase domain protein [Uncultured spirochete bdmA 4]



MTKIGIIGAGAIASVHIDSYNRLSEHAKVTAVCDFTRQKADGLIAEKALDATVYDDYEKL  
LADPVIDAVSICLPPNMHCSVAVIALKMGKHVLEKPMASLEECDRMIEASRVSGKILS  
VVSQNRFNTPFARVKNMLDIGVLGSVVYANFESLWWRGQLYYDLWWSGTWEQESGGCFMS  
HAVHYLDLMHMLFGMPKRVQSVMSNVVHDNSECEDLGFAVFDYGDKL VQFTCSLVSHGER  
HGISIEGEKGSISIPWAVSASRALPNGFPEEDTAQREKLEQTYHSIPELPLEGHDAQISN  
FLKAIRNEEPVVVNGSEGRKTLELVMGIYNSSVSGTSFAFPVATDDAFYRKETMVAAMPK  
FHEKKKSVDNFSTSKITLGSNMGR\*

>SPBDM4\_v1\_50299|ID:27158662| TRAP dicarboxylate transporter, DctM subunit [Uncultured spirochete bdmA 4]  
MWQIFFVFAILLAFIFAGFPIYMAIILTTSFMVGMHLPLNLVVIKMFSGVNSFSLMAIP  
FFIIAGNIMTKSDITDKIVDLSDSLVGQLKGGGLGHVNILASMFFGGIQQSGIADASAIGG  
MLIPAMEKQGYDKDYAVAVTAGSSMLSPIPPSIAMILYSYYTEIPVSKLFLGGIVPGFG  
IALLQMIWNRIEYSRRGYNIPHTTFSFRRLGHTLAHSIGALLMPFIIIGGIISGIVTATE  
SGVLAIVYGLVYGGFFISKKLKLRDLVGILKDSAVTTAVVMITIAATGALS NVLVRMRFQS  
NVLIVVNTIGNPVGLTFLMFVIFFLGMFLDPTVLIAMLAAPTILCIGNAFGFNPIHYGV  
VMVIMMHVGAITPPVGSFLFVSCAIGNLPIEKATVPLIPFIVTVLLTILISFFVPQIVMF  
LPNLL\*

>SPBDM4\_v1\_50300|ID:27158663| Tripartite ATP-independent periplasmic transporter DctQ component [Uncultured spirochete bdmA 4]

MAKTFYVWFDRIRTVMLISISFTVILCFIQIVLRYFTFLSLRPFAGWDEVLRRLCAIWVI  
FLGISLGVKNAHFRVDLFLNKKIKSPKARQVVDTIIDALVMMVLILLTYGGIYAMSNT  
SSLQNIIDMSMAWFYAAIPVGCIFEIIEYIYKLAYGKDYPEKMFQKQVTLANSSTK\*

>SPBDM4\_v1\_50301|ID:27158664| Extracellular solute-binding protein, family 7 [Uncultured spirochete bdmA 4]

MKKKTLVIFLIIVLGVASVYSQGVYQLRTSTNLAGTGTIGRGLTYFVDLVNKKSNRIK  
ATANYGAELGNQSEQVEMCRTGSLEMVVAAPGTGPGTWVPQLMMFEFPYLFKDNDHYRRV  
LKGMEGEVSRVLPQYNFVAVAGQSQGSRDMLTKKPVEKLEDLANMKMRGPNAVYISMFKA  
LGAAGTTMDWNEIYTALQTGVIDGMEASPSMINSMKFQDVAKNLTITDHIACVYYFFND  
KWLSSLPSDLKQLVLDCAQEAAQYQAKIDDEDQIASLNKMQAGGVTIHQLKDKDKWVAAC  
KPMLENEYRAKKGKEWDFIDKLLAIQ\*

>SPBDM4\_v1\_50302|ID:27158665| Transcriptional regulator, GntR family [Uncultured spirochete bdmA 4]

VDIPSRLPKENAREYAIRILKSNISLELAPGSVISENEIASQLGLSRTPVREALIELGK  
ANIVEIMPQKGSRVLLIDYSLVEESRFLRLILES AIIKEVCELKEPQDYSILQENLTLQE  
FYLKNPSPSKLLELDNQFHRELFRANKMRCYQWMIDGMEIHFDVRSMSTIKDIKIV  
EDHKAILQAIQKKNASQAVAAVTKHFSRYKIDEQAIRTKYDPDYFLS\*

>SPBDM4\_v1\_50303|ID:27158666| NUDIX hydrolase [Uncultured spirochete bdmA 4]

MKNPEPWIETSSREIADCKIFRVRESMRRTRDGTVDGAFYLVDAPDWAGIIPVVDAPPEGR  
KFVMIRQFRHGTGKISVEFPGGTIDPAEDPCKAIARELLEETGYRAEMILPLGDLSPNPA  
FMTNTFHAFIAEGCYLDSMQHLDAHEEIEVVLVPERDAVDMIGGEEYGHALMTATLFFYM  
RYRGYS\*

>SPBDM4\_v1\_50304|ID:27158667| Glycosyltransferase, MGT family [Uncultured spirochete bdmA 4]

MGTGVFFNLPA YGHVNPTLPVVRNLVARGERILYFDTLEFKEKIEATGAEFRDYGFGMPA  
VAENRRKGGNFVQLAGVLLGAAEKGLPHYIEEVERLAPDYIIHDSMCPWGKYIAGYLIR  
AINTTSTFVFTKGTGKAGGFGGKVVKMARESGAAGVSAVLRSKKKLERQYGLKIGIMDI  
FRNTENLNLVFTSRYFQPGGDDFGAEYEFIGPSIAERN DAPGFAFDFAAADPLVYISLGT  
LENDRRDFYVRCIKAFAGMGVHVLSIGRNVKREELGSIPPNISVVEYAPQLEVLKHAQL  
FLSHAGMNSVNESLYFGVPLLLFPQQEQVMVARRVEELGAGICMPADGADSGDIRAASR  
TVLESRN FYENARKVSDSFKASGGYERGAELILRYVSTG\*

>SPBDM4\_v1\_50305|ID:27158668| putative PEGA domain protein [Uncultured spirochete bdmA 4]

MRKKILLGVLVFLVLGGLTFAQAKVSLTIQCNQSGAQIYLNLDNLVGYTAPNFSLSIFPGT  
YTIRVVKDGFPEFRTKVVAAQSPITIVANLGGATPQTPQAPAPGPIQLMPPTPSSPPPKP  
PTPPSPVWQLSIDANINGARVYINGSYAGTTPFAISLRPGTYSIGVSLGGYEDYTTTTLRL  
NGPYHIYARLSPLQLPVYIDAVNTPGANIYRDSAYIGTTPYRGTWPRGTYYVVRITAPGYA  
DYVERVFVDGSTNLQVSLSPVVEYEIKLPDNFSNSWEKPGKFNEMELFIDGVRLNRLRG  
TIMPGAHTLTMTYRDLRFENEFTVGGPKPATIELFLGVRVY\*

>SPBDM4\_v1\_50306|ID:27158669| exported protein of unknown function [Uncultured spirochete bdmA 4]

MKRRLKTVLIIGVALALLSACTIVIGYSRVLVYDDNGSNSGSVPIDSSRYRYGDTVVLV  
NTGNLTKNGSLFVGVWTEPDGSGRAFSPGDAFSIGSSSVVLYARWMPWTSIPGEWTL  
SYKWDTPQWRSIAWTIYSDKTFTDNYGGAGVWDISGNMIQLLYNNGTYFYSSGT  
LYTSSNNTWNSMQGTMSGPDIYGATHNGTWSAERGVKASRAPELPSGGLTPSGEPVK\*

>SPBDM4\_v1\_50307|ID:27158670| conserved protein of unknown function [Uncultured spirochete bdmA 4]  
MKKIKEAEGRGRPRDVTRDTVILEVTIQGLVELGYERLSINEIASLAKASKSTIYRRWSS  
KATLVADAVAYWMEKSVPLETPNTKSLTDDITLIVSVVPDGAFRNAVTVFLDLASVGIR  
HEELRSAISHEILEGRRQQLREVINNAIARGEIAASAKTAQIPNMVIGLILVHMLTDRLC  
GRDDIHRLVESVIEPLRKK\*

>SPBDM4\_v1\_50308|ID:27158671| NAD-dependent aldehyde dehydrogenase [Uncultured spirochete bdmA 4]  
MTNSDPKKMQHEERLLINGRLTHAKAGGTFNNINPATEEVMGVVADASAEDIDQAI  
AAAR KAFDET  
DWTSTNHAFRKH  
CLEQLHAAIMEEKELFRAELIAEVGCPVTLTFGAQFDWPISDGLLWPAHMIDTYPWYRKVSDQHILGGRPTYRWVWKEPVG  
VVAIIPWNYPF  
EILINKLGPALATGNTM  
VVKAASMT  
PWNATRVGRLIAEKTDIPAGVVNVVASQNHQVAQMLFSDPRIDMI  
SFTGSTTTGRMILEQSAPTFKRTLMELGGKSATIVLDDCNLSAVLPQAVMTAFMHAGQGC  
ALPTRL  
LIPESRYDECISTIAAVVRMVGCGDPNDVGT  
TVGPLVSEKQRDKVLGYIEKGKAGEGARLLAGGGRPKHLKRGWFVEPTVFVDV  
DNMSTIAQEEIFGPVLSVITFKDDEDAIRIANQSKYGLSGFFWSASRERALKVARRV  
RTGSM  
SINGGQFYGAESPYGGYKSSGIGRQGGIEGMEQ\*

>SPBDM4\_v1\_50309|ID:27158672| protein of unknown function [Uncultured spirochete bdmA 4]  
MKD  
TTDMWGYRGKTVVIDGAASGMGMAATKILIDLGA  
EVYALDIKE\*

>SPBDM4\_v1\_50310|ID:27158673| protein of unknown function [Uncultured spirochete bdmA 4]  
MKR  
GEGAIAI  
SSMAGMQWRFHGLYYQGLIDTKTFEEGV  
AWIAENGVKIKTEKGGSYSFSKECISAYGKAKAAELAPRGIRFNVLNPTTTVTPM  
MKDFQKNV  
GEMLN  
NYKVS  
RFATAEEMGYPLVFLN  
SSMASFISGQELTVDEGLS  
AIMELAPVTQS\*

>SPBDM4\_v1\_50311|ID:27158674| conserved protein of unknown function [Uncultured spirochete bdmA 4]  
MYRKTEFLAALRKRGLDESAIQTHLQAIAGLDSSLAARGLSLERP  
KLAAVEAWLSERLREGESIYDFLIPAARYFTAARQETVAIRL  
MAYLLPIGVLPAMADRLTTLEGEAVRSHVMSGVTIPAEGSPPEAY  
PDATARFVEALEAEIGPEKARRVLAWN  
VHEIPTAAFALDRERFLDLGSIDAWLLDH  
HRRQVEILRRHAKDGT  
LWFEQRITQAVVDFVEARPEILGGVREGDIIYTTKI  
PYDPDGYLQATDGLERRRLACHCPLALASITERDAGV  
PPLWCACSAGYTKFMFDVVFGEETETVVLESVLSG  
SERCRAIKIPPSVSLGA\*

>SPBDM4\_v1\_50312|ID:27158675| Transcriptional regulator, GntR family with LacI sensor [Uncultured spirochete bdmA 4]

MSYK  
KYEMVTRGILGKIESGEWSPGTQILAERKLAELFSVSRITVQKALDDLVERNIL  
ERPAGRNGTFVRS  
DPMVSQRTTARKESRLVGVAIDDISDSFGAHILRGIEDCLW  
NRRYHTIICNVDRNFRKVEDYFFSLSEQNIDGVIFSPVIESEA  
YEEKNRSIIERIERQETPLVLLDRTIADTRKNFVSTNH  
REASRRLTADFIARGNH  
RRLILVTGVSCSSIAERE  
EGFLDAVRAAGLDPGEQHIVRLNDNLLFPELQPN  
SPYIEEIRRAIGD  
VDGATGFVALNGRLLRGASLALCGMGFPLGRFTRSD  
LHGQFAVPLDGTGDTLVS  
VQPAYQLGYEAARLL  
LHSIETPGSATMQIRLDADITLFG\*

>SPBDM4\_v1\_50313|ID:27158676| LysR substrate-binding protein [Uncultured spirochete bdmA 4]  
MKRTFILVLLVALAGLMPLAAASNTVTIYTMSGPEITTPILDALRAKYPSIN  
VNLVKAGTGEIVARLQAEKNNPAADILWGGDNLA  
VFDGNSDLFAAYDSPEDKYMVSRDPNHK  
WHAFTIFCQAILVNTNLVKPADYPKNAKDLLNPAWKKAGGVALADPNKSGTGYTIVSGLSSAF  
GWD FIEKLVQNSV  
VLP  
GSDPMFKAVKDGELPVGF  
INEDLGATWKAQGLPIEVIYAKDAVTVQM  
DACGLVKNGPNPELAKKVLDFLCSKEAHTIAVKVINRRSARTDVAPPAGLPDLGNL  
NLFTA  
TEPREVVNAKFTKIYGK\*

>SPBDM4\_v1\_50314|ID:27158677| Binding-protein-dependent transport systems inner membrane component [Uncultured spirochete bdmA 4]

LKFSRIHAFKDPWKFFTLIIFVVLTVLTVVSQLWILKTSVQEKGGAF  
TLRTGQGDRPAEIEGETLSGFTLRQETPSVITLARSGRDFFSIDSSVSGQIVLSSQSLTFGE  
PALDEDGK  
LKI  
PYGTSTGGDPARRSGTGS  
LQIEQKVFGTLFQSSAGKRLEVECLSPGSLRIYHAPKAYLNFSDSSV  
RFLAN  
YITFLTTGKYLD  
AIVNSLLIALTATVVAGVLGTTLAYLYARYKMPMTSA

VISLVTMASVSPFLGAYAWRMLLGSSGIITRFLGINWTIMGMHGVIWVVIWLIFPVVFL  
LSYDSFV SIDNSMRECSYSLGADRRRTLFRIELPLAIPGIVTGLYMAMMTAFTDFGTPYI  
ISLDLNTLPVLIYKEFMSEVGGNYSIASSTGSMVLLSSMILMAQRIYLAKRSYASIKTQ  
QPSARMPSAGKKVAIEILTFVLIAMAFVPHVTVLVTSTFFKWEAGILSSRLTWENFSRLFN  
LNLNSIWVTLSTGTAATFLTFSLGIGIAYVIVKKRYPFFGQALNLLVMIPYIIPGTVLAI  
GFILLFNKPPILLTGTWLVLA YFVRKLPYAVKSAESALYRIHPALEEAARSLGATPTK  
SFDVTFPLMIGGVISGATLSFLQIMTEISSTIMLYRPPWKPMATAVIFENTIDAGADFGV  
ASAMTVVLMVMMLYVPLYFITTTRKPKETRIEEL\*

>SPBDM4\_v1\_50315|ID:27158678|fbpC| Fe(3+) ions import ATP-binding protein FbpC [Uncultured spirochete bdmA 4]

LKNYERSDDAQAVSVTIENVVKKFGSFQALGGVDLSIRSGEFFTLGPSGCGKTTLLRCT  
AGFERPTSGRILFNDADMTHIPPWEKNIGFVFQNYALWPNKSVYANIA YGLEIRKKNSTF  
IREKVEWALDLLGLPGIGEKMPQLSGGQQQRVAIARALVIDPAILLLDEPLSNLDAKLR  
ISLRFQIREIQKCLKITAIYVTHDQEEALEISDRIAVMNAGSVLQVGTPEDIYERPSQRF  
VADFGKANLVPGSREGDVVFCSDRFKRLRSPEDHERMAESQDAEIMFRPEALREIDGRG  
HADIEGRIIDFLYHG NLRMYMVDAGCDAPVVYETNIPHTVGDPLRLAITQYRLYA\*

>SPBDM4\_v1\_50316|ID:27158679| Glycogen debranching protein [Uncultured spirochete bdmA 4]

MKKSEFFSRLPAMDAQFGNLILIRDKADRKDVPGAQECFLSSVVQFQPLARLGICGPAGA  
IPLAPVSSSSDPIRARKVFEGGGLRFLQELVVS GDEASLALKIEKMGEGGGGSGDTGRS  
VFTLTVDGACLFSPQGVYPYHWRDESLLSVRRAGGEENGLDGEWSYGRLPFSLRSSAHFDN  
FKIRRVADDEIIRTHYFTSFNLKKRYTYWVEAEGGTSAGAAPSADSTVGNGASPVARNV  
GYEASIDLGLREAREIVLAFGIGGAAEKTEASAGRHAELIRGVEADWDGFLEGVPEFRA  
GDKALERMYCTSWFILKANRVHFDDPRFPYPFTSVNKHYYNQFFWDSAYQAIAWLWYNR  
AEPAQDELRFVVTNQWRNGMIPYELFMYPVNGREWMDGDGTSTGMTQPPVIGIALSEIYK  
KYGSSEYLRFFYEPLRYEDWLTLYRDLGKRGLSCYLN IWETGWDNSPRLDASARNR VLD  
PAIESADFNAYIYYMRRTILEMAAALGEKVPPRVSGRMEATKRAMNTLMYDVADGFYHDV  
VAGTDERIPVKTAAGLIPLVTDIPDRAARGRIVAEYVESEKEFMTGCPVPSVSRSEPTYN  
PVDFWRGANWPQITWTVIFSLADSHPEAAGEILRRFLASTKGNSTCYEYYDAETGKGAGM  
PFQGWGALYTDMMIRFVAGIIPENAGMRFHPLSAEIGDFSVDNVRLKDLALDIGRRGDTW  
TFAFHGFGGFAMEGVHEFRALPSADGARLKI KFGPGCDRNLVMPLPGENRLEFRFV\*

>SPBDM4\_v1\_50317|ID:27158680| putative Glycerophosphoryl diester phosphodiesterase [Uncultured spirochete bdmA 4]

MELFNIYDEHRATPLITAHAGCQGTEPNSRESIVAAFNSPADIVEVDIRASADGVIFLMH  
DNVLALDDGENVPLGNLSWNEIVHTLDSRQQRVILRFEAFCDVDELEQGFPRTTAPKRP  
FFNLDIKDPAALPATAAIARSREIMPRVIFSGLDEEGIALASRRIPDLSYLFNADGMLPG  
REKAGTEEVGMKEACSLALRCGCKGINLEWTLASAALVHHIHERGLFVMLWTVDDMPAMR  
CVLEYGPDSITTHYPDRLALLLED RKRKSRPGTR\*

>SPBDM4\_v1\_50318|ID:27158681| Binding-protein-dependent transport systems inner membrane component [Uncultured spirochete bdmA 4]

MASYVTTKHSPLFPILMIVILLITLFPYIYWIVVTS LKTPVENILPVPTLYPHKFTLDNYQ  
KVLLGGSLRNLNFSIFVTA VSTLLSLAIGFLAAYALVRYKFPLKFNVVFLVWIIIKMLP  
PVVLA VPLYEMFSKMHNLNLWGLVVVFQVYTLPYCIWMLFGFLKTLPLEYEEAADIDGA  
SRLQIVRLVVFPLVQTGVVATAIFSIIAWDEFLFSMLFIRSPQLTLP LAIVGYIGEFE  
TLWGQLMAISVLAIIPIIFVRFVYREMASAYS LGLK\*

>SPBDM4\_v1\_50319|ID:27158682| Binding-protein-dependent transport systems inner membrane component [Uncultured spirochete bdmA 4]

MKSIGKTRGKTLFFWSILLPALIVMLWLT VYPMITVFLTSFQNYNYISGRRRWIGLGNYR  
NILTDQVFLTSFKNTIVYCFSTTFLEVFLGTALALV FYGNFRGKSIFTILLIPMMLSTM  
VVSSVWKTLFHYDIGLLNTILSQIGLSRVGWLIDPKMALWSLVLVDVWQWTPFAFIVMQA  
GLSSIPQEVFEASVVDGATYRQRLFRITLPILRDQILL LCLLRTIDTFKIFSKVFALTGG  
GPGNATETTSFFVYREAFQYFNLGRSSAASMITLVA VVLM SIFYLRKMLNPREA\*

>SPBDM4\_v1\_50320|ID:27158683| Extracellular solute-binding protein family 1 [Uncultured spirochete bdmA 4]

MTKKTALLLSLCLVLSGVS AQKQVKLVIAGR DGDYGNAMQVA VDAYMAKNPNVKFDV LK  
LSGDDVYQKTVIDLKS GTGYDLILIDDPKVLQYQRAGWLTDL DAMFKKSGKTVDSDFIS

TVMDLCRYPNNAKGLYSLPFVGNVSLFA YRADLFAKYGLSAPKTWDDVLVA AKTISEKE  
SGVDGISFRGVKGNPILTAFLPIFWSFGADFTDASGNPTVNSPEAVKALKFFLELAKYGP  
KSTPMNNTAQVRDGLLAGTVGIAPEVWPAWLKIDDPNESKVAGKVKITKHPEEVKKSSP  
MIGIWHIAIPAASRNKDAAFDFLTFLTTSRETQKLMVLKAGLPPSRVSVFEDKEILAKYPW  
YPAISDALENGVARPRTLYWAEIENTMGGLIQEALIGQKTAEQALNEANAKIAEILKQ\*

>SPBDM4\_v1\_50321|ID:27158684| conserved protein of unknown function [Uncultured spirochete bdmA 4]

MDTEKRASKHRLKQKDLVALLLALFSEEYDKAQVDSITDILLPMSAIKTYLQSKVGISYT  
SDAWIITQVRKYEEEIDTVLFRKTASQEGAALGLCQNISTYEQKRHLYVTQKIRTANGVF  
DLMRNSVEKRPSGNTISILLEAGSTVTRVAEIIAQNLSLPLKWDICTHNLGVIECFGKT  
SPAYKNVSVVPQGFDPVTNLILSDKLELYMDREFDWIIQGTSFLADGNLYVEKPDES  
LKAKILHDCRGTKVLVLTGHEATLHLSCPTPEFGVISDYDYIVYPALAGDSAAAKKMNKE  
MAQFAETLPVIIRNWSYVIMAH\*

>SPBDM4\_v1\_50322|ID:27158685| conserved membrane protein of unknown function [Uncultured spirochete bdmA 4]

MNTAADAKLMGDVLRFRQREEITGSLLYGKLAKKCRDEHNAAVLSDMAAAERRHYEFWKSI  
SGQDVAPRRGLIILYALGRLFGLTFALKLLEKGEEVGAADYARVAPFHPGAEKMGEEEEE  
NHEDALLGMIDEERLSYVGSIVLGLNDALVELTGTLAGLTFQKGLVAVSGIITGIAA  
ALSMAASNYLATKANDDPKAKKAALYTGGAYLITVMLLVLPYLIVPQTGFWIYVSLGITL  
LIAVGIIAGFNFYVSVAKGQEFKPRFLEMAGISLGVSFSLVGLLVRSVFGAE\*

>SPBDM4\_v1\_50323|ID:27158686|garR| tartronate semialdehyde reductase [Uncultured spirochete bdmA 4]

MKVGFIGLGMGKPMKSKNLKAGYSLVVNDVNGATVAELAALGAEAAGNARELTEKVDVV  
ITMLPNSPHVKQVVLGPNGVIEAARPGLALIDMSSIAPLVSRELSRLAEKGMMDMLDAPV  
SGGEPKAIDGTLVSMVGGKKEVFERYYDLMKAMAGSVVLTGEIGAGNVTKLANQIIVALN  
IAAMSEALVLAAGAVEPELVYNAIRGGLAGSTVLDKAPLVMDRKFNPGRINLHIKDL  
NNAIETAHEVGAPLPLTASVMEILQSLKVDGMGDLDHGAIACYEQLAKTEVRRRN\*

>SPBDM4\_v1\_50324|ID:27158687| PfkB domain protein [Uncultured spirochete bdmA 4]

VGALCLICGNITIDDLVFHDGRVRMGVGGDGVYSALGASLWQKDVKISAVAGPDYPVQS  
LAEMYGLDVS YV TYKDKPSLRNWGLYEKDGTRQFVFRNEKNQWSEYSPAPSDLPPEILEG  
AFVHCAPMPWDKQIAIVRHARQCGATFISLDPPFQFMEGMDKEKLGEGLGFVDAFLPSCQ  
EVRALFPDLSPNDALERLIREFPHLKAIVIKLGADGAIGYDRITGEKFSVPAYKAHLVDP  
TGAGDSFCGGFLAGYLKTANARMSALRGVVSASFIIETEGTFGMNFDTQTAEKRLQEVTT  
EY\*

>SPBDM4\_v1\_50325|ID:27158688| Glucosamine 6-phosphate synthetase, contains amidotransferase and phosphosugar isomerase domain [Uncultured spirochete bdmA 4]

MHYEKKVMLEEILLQPSFLKENGKAIENLNSSLKKHDISAITHLYILGCGDSYYSALAN  
RMSLMEMTGLYVESIEALEFSRYVVNYMPTGSAVIGVSNSTVSRITIEGVKRAREKGALT  
FAITTSMTSPLAQAVDIPLIVNSPPNIKERPDGPPVVTGPGSVSYIASLLGVYCVGIAFGK  
KLGRLTDENVQSRLAELDGLADNILATIKLLDPIAREYAEKLPVERRLMILGGGPNYATA  
FFSVAKLFEGLRHPASAVEMEEWAHEEYFISDKDASVVFVIVPPGESRSRALEQMRAAHDM  
GAEVIAICSAADVEIEKYADVLFPISGAIREELTPFIYCVPFELFSCYLSSVRNKFFLGF  
DDPKRREVNFRQIFNSQIKDLQGKK\*

>SPBDM4\_v1\_50326|ID:27158689| conserved protein of unknown function [Uncultured spirochete bdmA 4]

MSKILDRMHAGEKIAIGMVQLTSLPGSSTFRGGS�KTMIADALGEAMALEKAGFDSVMIQ  
NLGDLVPDVKVSAPQLAWVSRIVFEVANKVSIPIGLNLMENDAEAMISSAAGLDFVRL  
KVFIVMVTVPFGLVEGCAHIANKTRNLVDASDVAIFADVHDRTGINLGGREIDPDIREAI  
DLGHADGLVLTGMDYGESMEFIAKAKRKFLRTPVLLGGGCNEDNLANTLKLADGVIVSSA  
LKDTNSAFGKINSEKAKRFMDLFKKMG\*

>SPBDM4\_v1\_50327|ID:27158690| ABC-type transport system substrate-binding protein [Uncultured spirochete bdmA 4]

MKFRKMMQIALVSVAMLAAGSVWAAPALKVAMITSESLGDRSFNDMMYQGMLRAEKEL  
GVKVNVIQPKSISEFKSTLARAELGFDIIIIGSSFDMIQPMQEVAQAQYPKQKFGFLVDVGA  
DSIAPNVVSSVTKDWEGSFLVGVIAAKTTKTGIIGFVGGKDIPIIHRFYLGYYYGAKTVN  
PNIQVLESYAGTFTDPAAGKEYTLALINKKSDINFAVAGATSAGVIDAAKQTKTFAIGVD  
SNQNYLAPGSVLTSMVKRVDNQAYDMIKLVVDGKFKGGVVLVDYGLKEAGVDYAMDEYNKG

LISDTTLKLAEEYRQKVMMSGAIVVPNYMELKEGQTMVGNPPMKNPYVK\*

>SPBDM4\_v1\_50328|ID:27158691|yufO| Uncharacterized ABC transporter ATP-binding protein YufO [Uncultured spirochete bdmA 4]

MTEALAMKGIKCFGTLIANDHVDFAAYKGEVHALVGENGAGKTTLMNILYGVLTTPNAGT  
IEIDGREVEIPSPVAIKLGVMVHQHFKLVPSLSVAENVVLGQEPGRRFLLDSVLAKKQ  
VKEIATEKLGIPIDPAIVADLPVGLQQQVEIIMKLYREAQLLILDEPTAVLTPQETEEL  
FKTLKKLADSGRTIIFITHKLNEVMSVSDRVTVMRAGKLVTTIDTLQTSAEQLAEKMOVGR  
SVLFRVEKKPSVPGQVLMVNRNLRVNNRSGLEAVCGLSLRIHENEIVGLAGVQGNQDEL  
VEAISGLRQISGGNIFLEGKNISSASPRQIRDMGAA YIPSDRTTIGLSVNDTIWKNMILG  
HHSSKEFGRGLSLDKRKANAFTEEMIEKFDIRGASPQAAAKSLSGGNQKIVLARELSRG  
GKIVIADQPSRGVDIGAIEFIHRQLVAMRDLGCGVFLISADLDEIFSLSDRILVIFKGRI  
MGELPSSEASVEEVGRMMAGIAIGGDTQIG\*

>SPBDM4\_v1\_50329|ID:27158692| Sugar ABC transporter permease [Uncultured spirochete bdmA 4]

VEILKLANSTNSVAVETRRASRSATAKKITVEIGRPIITIFIALLIGGVILLMGEDPIF  
AYGMLFRGAFKGMNSNIIATLQNTTPLLVTGLAVSLAFRSNVVNIQVEGQMLFGALAAAGIV  
GYYVHLPWFLHLPLAIAAAGLAGALWAYIPAILKAKLVNEMVVCLMLNPIAQLITSYIS  
SYPLKAPGPTNKTYDILQTAKLQFSKSSQFNAGFFIALVLLLIFWYVNNHTKKGYEWEL  
IGQNPSFARYGGINVEKNIVQVFLVSGMIGGLAGAEQALGVYGAFFYNGFSPGYGFDGIAV  
AMLAKFNPLVISLSALLLALNSGSIVMQMMSVTRDLVKVLQAIIVLLLAANFTLEMFR  
KKRKDDETLKKRPKTERKNHE\*

>SPBDM4\_v1\_50330|ID:27158693| Sugar ABC transporter, permease protein [Uncultured spirochete bdmA 4]

MNDILTDLITTIIRISTPLAFAALGGLTFKAGILNIAMDGFMLMAAFVGVGTAYFTGN  
LYISVVA AVLSSMILSALFGYFNLKFKANIFIAGTAIGILASGLTAVLLKGVFGQMGVFT  
AGKVLRFQYNIPIIKDIPVLRRELFSGYTLVYMAIYILTPVVSFVL YRTKWGLRVRAVGE  
SPDAAASLGINVFSIKMQTVILSGFFCGLAGAYLSLDYVSLFSRDMTGDRGLIALAAIFF  
AKGDPVRTVA VTLFGTAQGLSVMQLTAGIAPQIMQIIPYFVTMLALIIVGVQAKRKH  
NIEATTAR\*

>SPBDM4\_v1\_50331|ID:27158694|udp| Uridine phosphorylase [Uncultured spirochete bdmA 4]

MLDASKPTSEAGKQYHIDCSKGDLSRYVLLPGDPFRVPIIGSYWDSCQEISHHREYRSAT  
GEYRGVAISACSTGIGGPSTEIAVNELAVIRCIDLIRVGTAGGLRPDIACGDMIISTGSV  
RFDGSSGHYVWPEYPAIANEYVVMALIEACEVLGFTYHLGVTASVSSFYAGQARPSFHDY  
FPSSKRHLIEDLIAAGVNFEMESGTLFTLAGLFLRAGMVCANANRITNEWKVGDN  
NVARVGTAVRILAGWDQKKTESNRKYLSPSLFRD\*

>SPBDM4\_v1\_50332|ID:27158695| putative Asp/Glu racemase [Uncultured spirochete bdmA 4]

MYTKTKKIAILPIPVLEFERARRQNQYEFKFAAPGTSVDVIRLKGPELTDREYELFWST  
GFMILEAEQAASEGIDGILIDCTADPGIEQIAEAVDLPVIGALSAGVHLALQVGRKFSVL  
ALDAQWERMVRSRLRDYGLTGHLASIEYVGVKHYQPARGRNMVEGEAAAFINLLRAAGEK  
ALTAGADSIILGSTTIIDGIAELENMLRIPVIAPGIAALKTLEMMIELGIRQSRRAFPKP  
AIAYGTKMAGLLHIQ\*

>SPBDM4\_v1\_50333|ID:27158696| 5'-nucleotidase [Uncultured spirochete bdmA 4]

MKVYETILFDLDGTLTDPKQGMVKSFYALSFFKIEDPDLMLKLCIGPPLQDSFSEYFG  
FSRKDTEMAIKKYREYFSERGLFENEVYAGIPELLEALREDGRMLILATSKPALYSRKIL  
EHFYLRKYFAFISGSTMSGRLRKADIIRYGLKKRPPATSAAVVMVGDRKHDVIGAKEAG  
VDSIGVLYGYGSRAEMEACAPDAIIPSDALKKFFLEDGRP\*

>SPBDM4\_v1\_50334|ID:27158697| putative D-hydantoinase [Uncultured spirochete bdmA 4]

MKKLVRGGTVVAASGIFMADVLIIEGDKIAGIGHFDDLGDSEKELEIIDAQDCIIVPGG  
IDAHTHIDFPLKGFNSDDYWSGTCSAVAGGTTTIAVFLPAPRTDESLEENIRGARIAGD  
ENVVSDYCFQQTLSLSPSMLGEIPRLVAAGYPGFVFLGSDIAMNDRDILRVMEILRKC  
GGQLLVNGGNLGMQFATGALTSERADLSNYGRNRPEVIEAEGLSRAAYLARLTGMPIY  
AVHISSAQALGEIKKARAAGCSVVAETCPQYLLSDGKYKLNQYQALKYTLNPLRDRSN  
FEPLWSGLAEGSLDIVSSDHCPNHLHGQKQSPSDFLKVPNGLPGIEPRLLLLYSEGVCA  
HRLSLRRFVEVSTNPAKYLGLYPRKGTIVAGSDADIAIIDTRPDVIFSKRSMFERNDYT  
PYESMPRHGTIRATLVRGEVVFDAERGIIAQKGFGRYLPRFFGKST\*

>SPBDM4\_v1\_50335|ID:27158698| putative L-hydantoinase [Uncultured spirochete bdmA 4]

MINL FVKN AKVVDGRGISEENICIDK GKIVGKVS RSLQIEARTTIDA EGRFV VPGA VDSH  
CHIGQIPGTGHYRPQASKEENFR TETASSLYGGTTALNYM FSESSYETTIADYQKWVKE  
DSVIDIKLHGGLLSQLHIDN LPLYVKKLGLTSFKIYLPYKGEEAHKLGGLTSLSDGQVLE  
AFAALKRFRGLPIVHCENPD LIEYFMAKNQRNSEQSLAAWESTRPSIVESESANKILYFS  
TKIGNRVAIAHVSASDTV DLIEKYGAISPVLETCPHYLALSNDMDMGS LGKVSPPIRSKK  
DQERLWEAIARYPLVMIGSDHNAWLR RHKSELWNGFAGLPD NAFILPILFSEG FHKRRIP  
LTRIVQVTSEIAARQVGLYPRKGSLSVGS DADIVIMDTGIKKFVDP AELGSISDYSPFSG  
YEFSAWPHTVIVRGEIAVDSGRTLGLRRKANLLNAIRK\*

>SPBDM4\_v1\_50336|ID:27158699| Deoxyribose operon repressor [Uncultured spirochete bdmA 4]  
MRKIDPRMERIRKITEILKANKASSI HDLATSLSVSEMTIRRD LVVLEEKNIKLIHGGA  
VFNKPSGSIRGLNASRYVDRDDDLFDQKIRIAKKA VSLIQPKDFVFLDAGSTTERMCE  
YLPNDITVICHAINILESIYSQVECNIVFGGGYFHESTLIFESPQTVQLIRENRTNKAFI  
SARGADLKLGVTTSNRYETEIKRAAMESSQERILLIDSSKLGKVRPVFFSDLRDFHAIIT  
DDGIPQEYVDAIRESNIELYIA\*

>SPBDM4\_v1\_50337|ID:27158700| B3/4 domain protein (modular protein) [Uncultured spirochete bdmA 4]  
MRRRLVPHRCQIFPRWFFAETPTQTCAAPASKNYFLLQLTIMKTELQFADDERLRKVTLA  
LVELEGIDWGRAAEV APEALFEKILGEARASGTEVFGPRIKAARDMLRNGRYKPAGRAK P  
SSEYLLAAALEGSFPRVNPFDVAVNLASLRMYMPSIFDADKAGRALLCRLGAPGERYV F  
NSSGQEIDVEDLVCLCAAGPAFALAADLPPQPARGTPIVNPVRDSMATKLFEGAHNAV VV  
VYAPGGPYGAEGTAIASAARDLAEWCGRPSESVA VRFASLS\*

>SPBDM4\_v1\_50338|ID:27158701|sua| Threonylcarbamoyl-AMP synthase [Uncultured spirochete bdmA 4]  
MEILSTNDADLARAQAALREGKLV AIPTETVYGLGANAFDEVAVARVFEAKARPTFDPLI  
VHIARIEDIGLVAREVPESARSLARALWPGPLTMILPKKSEVPDIVTAGLPTVA VRFPKH  
PIAQRRIELAGVPVAAPSANPFGYISPTTAAHVISM LNKVDFIVDGGPCDVGVESTVID  
MTGARPVLLRPGGMPLEAIEAVVGP AVIPPRILHPAGEALSSPGQTL SHYAPSTPLYLFE  
ANSLPAAALATGIVHPSVALVYTPARAREIEALHVFDEIEVLAPCGDMREAAARLFSLLH  
EFDARQFRAIYAERVPEVGLGRAINDRLYRASKK\*

>SPBDM4\_v1\_50339|ID:27158702| exported protein of unknown function [Uncultured spirochete bdmA 4]  
MKCIYGLSLALLLCGAPLSLAAQDSEPVSPSTSPQTGDITQTLGRQTPPPLPLMLPV LGD  
PADPSGFFFAEQMCTQAQNTGLTPDQQQLAEFMYTLAFRFAKNPAAQEAGKSLFNLLSN  
QGR LAEAAIIAREWIQVFGPDWGM YRNLYDSLMAQGSFSEALSLVPELSKALPSAAKSRS  
TELSWMEYNARSAMQDFS WAENGLPFINAKTPDAYIAKVYRLYAAAPNVPQNI AALALFR  
AAATEKKYAEAVARATPILPTFAMS DTPRAWISELGRSFY GAGTWRQGLDFFSIALGLEI  
RSPEVPHTMMPDSMEAASTDATTEDATAAQPTTPESALPALDRARIPSELSWVMAFYLA  
RMYQGMGESQTAASIFIELVPLAFSGEDSDSALWYWLDITMDSIATTD SLLGDLGQDEAN  
AMHAKRALEISALSQAAALWKSPSYFEDIVADYMRLLREGAWDDVVRLCALMSQKLTVA  
MRGPLLYLSGRLIETGRANVDLSSESDFWKWLAPGPQTSAPS AFADAQNGNQGH AASPQD  
APQNAAPLFYQALLREKGIEEHYRTLAAWRLGIDPPVL ANAPILDKNFDIITAISSLYPD  
SEDPPVSDDKLKDVLDFIGQSLDYGLETLAADQVAALSPFSTDALLWLAMKFVQHEQYYP  
ALRIGREALNRKSAKPELGYALLYPWAWPEHFGELTAPRNIAEPLAYAIVRSESLFNQS  
AVSRSGAMGLS QLLPGTAAETARGFKMSQYALFNPKDNL TIGLTYYG YMLQRFDSSPVRA  
IAAYNAGPSRMAQWARDWGNLEDDILIELYPLAEPRQYTKNITAAALFYGKLYYGISAKD  
MLDFIYGKPLPQQALPAEATNQTATATSDAAGTAPQQIPAQNVNGSPPNLSP\*

>SPBDM4\_v1\_50340|ID:27158703| Methyltransferase type 11 [Uncultured spirochete bdmA 4]  
VNKFIRNKKLKGNFSCGTQEFWFQDESFWDEFAPFMFDETRWSMADA EVERIVALSGIAPP  
AKVLDLCCGVGRHSLAFARRGFQVTGVDITNSYLEAARESA AAEGLAIECIRE DARAFQR  
PGAFALCVNLGASFGYFSDARDDWLILRRREN LASGGVFVLET LGKETAARAFVETETI  
ECDGWKVGARYSIVGDWEKLG NVWRAQKENTVYERSFAIRLYAGTELKRLLLRAGFDEVA  
LYGDL DGRAYDQRAEMLVAVARKADIGRRALHTIGKNRR AHSESRIHRE\*

>SPBDM4\_v1\_50341|ID:27158704| protein of unknown function [Uncultured spirochete bdmA 4]  
MKPEIKAMNDLLDALSGLAARDWTAQEISKALGRALPAIPRPAIEILIGLTEEKFRSNPS  
RGPLVIVTFAGVLLRQYDGTPLTSEWREL RDLVSDCADELDMDTV TYAMSLIMDY GAL\*

>SPBDM4\_v1\_50342|ID:27158705| membrane protein of unknown function [Uncultured spirochete bdmA 4]  
MADPSAKRFSTYIALLLACIAVWADIIFSIPQPTAFSIAWFIVSALKNIVRIVFILYIAS

QLSFFSMRQWKHALGHFPPRPEMKKALFVMLLSMGCAGIGMVVSWLSGLSNPLLIAHRHV  
SVLVLLPFIVFSSISVGYAEELFFRFFLIDGLAEAGTSINTAAFVSTLIFALSHYAQGIF  
GIAFAGALAAVYTSLRFRGYGLHSLALGHALYDAIVLLIALA\*

>SPBDM4\_v1\_50343|ID:27158706| membrane protein of unknown function [Uncultured spirochete bdmA 4]

VRLFYEGIVANLKWGVRILWRNIERRGPPVCLAALGLWAGLGLGGGGTLQLGFVAVVFGAF  
AVSWVELCAAAAKRGRILLGALCAGCALSAGVLRFOIQQEAVPGAVASADVRLGHIDAFE  
GRLDIDSQTTARKNRKLELKVRALEFVGLNFRVRCWEKRPAFSQFLLSGAGPRLSAGTMI  
RAESVRGGDFWVDARDIKRLEDARFFARLRAVLASHFAQGISTAAGKAGPLAQALLGV  
KDELDTFEKGLFQEAGCAHLLALSGQHLSIICALVTLVGRRIVRKEKRVRRVSLGFAWFF  
VWLAGPGPSLLRAIFMLRIAIEIGKALDRPQSSFALLSCAAVLLALLAPSSINSLSIYSF  
SAMAGLMLFAHRFSGFLKPYLPNSIAQALSASLAAICGTAMVSVLTFGTLPASVLSATA  
AAPVMLAFMWIALSGLLAGFFPVIGHITAPALELLQTVLTSILAFGASLPAIHLESDMA  
GRIACVLIALLIYAVPWLQWRNSRRTMEMMLDAKNPSLRARNRFPLFEPRKE\*

>SPBDM4\_v1\_50344|ID:27158707|rsmA| Ribosomal RNA small subunit methyltransferase A [Uncultured spirochete bdmA 4]

MNFRKRLVIYMGYNELNYDSPASIHAFLENNLAMSRRFGQNFLVDRQARERIIRALEVE  
AGMRVWEIGPGLGAMTELILEKGALLTAFEIDYGFVRLLEGLFSSCDNFSIVKGDMLKTW  
RIQADRPDRIFGNLPYNVAFDIIMDLLKHGCVPPRMVFTLQREAARRMTARPGSKDYAAF  
SVLCASVCDVRILFDIGASAFWPQPRVTSSVIQLVPKREPVPFEQRKDFDFVREAFSSR  
RKTMRNALYLWARATFPSLDEGEFEGRLQESLSIGFGADIRAEVLNPEELFVLYRALML  
PGRPDRH\*

>SPBDM4\_v1\_50345|ID:27158708| conserved protein of unknown function [Uncultured spirochete bdmA 4]

MSEEEVKLSVVDEEEVDTVLGSEIEFEGDIESSKSLMIKGVSGTIRCGAELYITEQADV  
HSNIHAATVVIRGKVYGDIAADSLIAVLWDWGHVEGSLAAPDIYLSNCFKGTTVITS\*

>SPBDM4\_v1\_50346|ID:27158709| putative Tetratricopeptide repeat protein [Uncultured spirochete bdmA 4]

MRHTSKSIARIAILGVFICIVCASEASAQTLIAAINVPSGMTGSDILRMSQEGKHNEVAL  
IAPEILKKNPQDIEAYIGYAWSLNALKEYQKARDIAQAGYAKFKDPRLAQALGESLYYLG  
ENETALANLQEYLAKFPEGNKAAVTFYLCGELFVRMGKFNHADIAFSTALQYNPNARWW  
TRLGWVREKLSRYLPALKAYEAAVNLPNLQDALSGKTRMLAKIQD\*

>SPBDM4\_v1\_50347|ID:27158710|mtaB| Threonylcarbamoyladenine tRNA methyltransferase MtaB [Uncultured spirochete bdmA 4]

MTLLRVAFQTLGCKLNQLETESVADKFLDAGAEIVPFHLSADLYVVNTCTVTSKAEQKAR  
HDIRAALAKVPHAVVVATGCYAQMEDALALGERVVVISGDLKGSLLLLARWLSDNWQG  
HGELLHAVLEWQEEIKGCAKAAADTAFASFDRFVHPERFAMHSRPAKIQDGCNDRCSY  
CRVCLARGPSVSLPAREALARVRKLEESGKAEVVLTVGNLAQYRGDGLDFAGLLAFLIKE  
TNSIKFRISSYEPERIDEAFLATFANSRVRPHMHSVQSGCTDTLHRMARPYGAGQVRHA  
VRALRTARDDPFLAADIAGFPGETDAEFETTFGLLSEFDFAWIHAFPFSPRPGTRAATM  
RPHVPERVMGERVERLLALARRGKHAYIGRWLGREVEMVVEHETADAPRIIGTTENYLKA  
EVISNSIGDIHPGEAVKIVIRDESKSGHAEIRAYLAGI\*

>SPBDM4\_v1\_50348|ID:27158711| exported protein of unknown function [Uncultured spirochete bdmA 4]

MRRGYVAYAALLAMVILLFTGCDALIGNAFKAAANLQPSVEKIKELDTAALVAQAGITSG  
SVSDTFIQTIISDDATKA AVLATLQTTVDTGSASDAQAAQALILDIKLADIGADEVISNV  
NGAIGELASLSDSEVVKPADIINTLLPADLTGEALADFIDEIGALGTDVDTLAQKITDNG  
GTVTEGLDVATLAQTAALVKFVNIVDPADGYSTGEAVAQAVADLKADPDADVTKYFDKEP  
DISSLADDATLKTFLDAAGLGDLLDQLSGSGS\*

>SPBDM4\_v1\_50349|ID:27158712| conserved exported protein of unknown function [Uncultured spirochete bdmA 4]

MKRKALIVILLITAVLAASAQIQFSEIVPKDARSMGMGGTFRVFSQGYSSFFGNPAGFAG  
ATQSFTLADVSAWAYLAPTSENLRVQGIINDTASDITDILGYAGDWLASNGLGAGASVG  
GGWVGKKGLAIGVTLVTDELA YGDSLLGAKLVSATQANGIIGFAYPINLGPVWLKVGADG  
RVFYRLQSDPTTGWPFNTILTDVLNDSFSPSSLDLFGGYGFAADAGLVFGVGPVMLGFTA  
RDLGLEFKVGSLLTAQNLIDSNVSALPTSGTTAAALTPYTAGLGLRFLFEDSKFEPSVYAE  
IDDPISLFSSTDIVTDFVFTSLHAGAQLRFRFISVRGGLNKGWYSVGAGLDLSFVEIDAA  
IFTEEVGLYPGDRGRSGLSVQAAIRFGR\*

>SPBDM4\_v1\_50350|ID:27158713| conserved exported protein of unknown function [Uncultured spirochete bdmA 4]

LIVHCRRLAAIILFAAICISISGFAQSSLSNLLPKDARSMGLGGSSLVFAEGYGALWGNPA  
GLANKKSLTLIDSSSTWAYIKPTPLNIKNILAILNQQMSHDETASTLDGFIAENGFGGGEY  
LGFGWIEDGMGLGITSITDAVVSGSALSDSAVIDRSQTNAVLGMAWPIHFGPVEFDIGAN  
VRGYRMETASGGWAFDPLAEALMTNSDIYSLMYPNKVKGGFGFSIDAGATVSYGPFALG  
FMVRDLADKFAMKDSSEIEIANSYMVPSGGLDYAVSPVYTAGLSLKLNQSSSFSTTFV  
EADDPFSLVSLANDIEAIPSKLHIGAEIGLLKFLALRVGYNQGYLSFGTGLDVLFLVFN  
AAVFTEPVSVAGETVGRGTGIMVQAAVRF\*

>SPBDM4\_v1\_50351|ID:27158714| protein of unknown function [Uncultured spirochete bdmA 4]  
MGQPLPGGILVCRPGPDEFFADEVLSKVGRVLKERPSIAAFAYGFNETGANAKSISEATD  
F\*

>SPBDM4\_v1\_50352|ID:27158715| Calcium-transporting ATPase 1 [Uncultured spirochete bdmA 4]  
MKSWHTRTIEATLEEFRTNAELGLTSEEAEERLEEYGPNTLKGKKPKSLFRRFFEQFNDF  
LIYLIAAAVVSVLLGEISDAIIILVVVLINAIIVGVIQESKAIEALKKLSSPRALVV  
RDGRQTEVKAEEVVPGLDVVVDAGRVLPCDLRWTTETVNLKVEEASLTGESVPAEKDASFL  
GEEEAPLGDRLNMGYLSTTATYGRGRGIAVATGMSTELGNIAEMLEAEPEEATPLQKKLD  
DFGKKLGTGILILCGAMFLLGLGEELIRYGAIKGSVFELFLTSVSLAVAAIPEGLPAIV  
TIVLAIGVQLMSKEKAIIRRLPAVETLGSVTMICSDKTGTLTRNKMSVTAFFSSDGQAGTA  
AELDPAREVHKLLLDAMTLCNDATIGAGLAGSQAGGSASHVTQATGDPTEIALLELAKHEH  
GIEQTDLLLAAPRVGEVPPFDSVRKMMSTVHEKDGARFIMTKGAVDRLLGKCTRYRDRGRE  
LPLDDAARSAILASSDTMAAQALRVLGAAWRPLADGEEVSGESVESDLIYLGAVGMMDP  
RLEVRDSVAACRKSIGVAMITGDHKATALAIARELDIASDENDALSGTEIDRLDDAQLA  
EKVRHVRV FARVSPEHKVRIVKAFRSIGHIVSMTGDGVNDAPSLKAADIGVAMGITGTDV  
AKGAAEMILADDNFATIVRAIETGRKIYNNIRKAVLYLISCNAGEIIVVFTAVLFGFPIP  
LLPIHILWVKLITETFPALALGMDPGDPAVINEKPRDPKESLFARGGTSSLIMNGIVIGA  
LTLSAFFIGMKRATVEGLTGDAALKLARTMAFATLSLSQLFHAFNLRHPTRSLFSIGIFG  
NRYLVGAFDAGCLLQVLVIMIPFAGFFKVTGLGAMEWLIVLLAVFTITLNEVVKVFKR  
RKL\*

>SPBDM4\_v1\_50353|ID:27158716|malQ| 4-alpha-glucanotransferase [Uncultured spirochete bdmA 4]  
MNSSSVSSECIDYAGLFAINSYLMDTAWCLFKTNVQQFQSDFLFCAINAVWLDDYALF  
AAIKETEHYHAWNEWPQELRFRKRSALSRFSLDHVDHIGRVKFSQFLFFSQWQALKDYAH  
AHGVNIIGDIPFAAYDSADVWAHPELFMLDYEGLPHTFAGVPPDYFTATGQLWGNPLYN  
WPVHAKQNYAWWIERVHRSFRLVDALRIDHFRGFAYWAVPAGEPTAEHGRWEKGPYTL  
FNALKGALGELPIIAEDLGFITPEVIDLRDGLGFPGMRIQLFAFEPEEDNPDYPHNYPQH  
CIAYTGTHDNDTSTGWLESASPAARARALAYTNGSPRSFCWDMIRTVWASPACIAVAPAQ  
DLLALGSEARMNFPGRQNGYWTWRMRENALSADIARRLRSLSETYFRVSGV\*

>SPBDM4\_v1\_50354|ID:27158717| exported protein of unknown function [Uncultured spirochete bdmA 4]  
MRNKILFFALMWAALAMSVSGQTVSLVDSSVTPSTV TYDSYSGSDTTGPQFTFTVKLSSQ  
PSKT VYFSAVINGSSSPSSRALTSSSNTLTVGFYQDSSYNTEIKSTSDYPPYYYISGSFA  
RKTNILTQFTVYPLLAKGQSVPWGTYTGTFSIRLYQSSPTPTGTLRDSETIYYTANVDQT  
IDVRVGSSGGSYDTGESSYNIALGDLSQGPTGSFGIFVRGNTAYTL YMNVTSGGYLTSTT  
TSDKVRYSLTINGISYTLGPSVIIDRQTSKAMYSKVLLGEISVPSGQDVEAGQYSDIVSF  
SVVAN\*

>SPBDM4\_v1\_50355|ID:27158718| exported protein of unknown function [Uncultured spirochete bdmA 4]  
MVFRKTSFLVLSFVWGITMLFGQVPGVRKTNGQPAFPNVPIAHDTIMPELRISFALTIN  
GKPMGEIDAGVWHNEAILEKEPAARLLIDYLRPDIYSTIFDTIFKGLTWLSAEDFAMAGM  
TFVFDSSALTISITIPPEYAPVVDIDFVPEQVPNYKPILRPAPFSGFIQNESNLQVSSSS  
DSTLFFSTKLYSMIDIMGTHLFGSGYVLSLQTSSSSYFDSIYALWNDNARKLQISLGMIS  
APGTGFQSQPSLYAISFASVENQRYLVRQGFIDDKTEFTIHKLAKVTVEVNGRPIRQVLL  
APGNRYRILDLPFTTGLNEFILRIEETDGNVQVLRRIVPRDGNILQVGTSEFAFSAGTSTT  
DWSEFFASGYLYLGFSPFSGGINLQSDKRSAMGGLTWVSALPIGTLNGSASVVGRWDGW  
GEMFAPAASVSYLFSMPEKDYIPSLRISANYRGLGFESPGTSAPTGSAPDAFFSLSANLY  
SKIFARTGTSIGYSFTLTESAPPTMTHGLYASISQSFIRGGNVNLSGQLSFPASGTPTFS  
AILAFSIMPKDISQRSFNLYQTSEGSTSLGILDKTSAFGQVFDVNLNASNLLPGSKNDSS  
VGLGIRNNSDYIDVSASGTLSYANSTNTYSGSGYAQLRTTMAFVGNHVAFTTRQIPDSFLL



ITSSPAMKNGAVSYKLSGSGQYLAKHGQNVVPLTSYTAVLSTDLVEASLNLNPRHPFV  
VVSPAYRSGILFESDVVKRYIITGRLIDQNGKPIAYLPGDVYDIGGSLETSTFTDELGKF  
DIYDILPGMYRVEWPEGYGSTQFELPETESDSIDLGDVMIHIETK\*

>SPBDM4\_v1\_50356|ID:27158719| conserved exported protein of unknown function [Uncultured spirochete bdmA 4]  
MQNILRHYKSLAFASLFMILGTA VFAFTFMPMSISISPSGAQSIASFRLTNDAAQQIAIS  
VKAMTRQIDENGNENPADNEFTIFPTRVVVQPNFQNIKVQYKGSPLAKEVAYRIIA  
EQVPIDFSQPQSSGVKVLFRYIAALYVAPSNVKDTLSVSKVEYAEQDGKKGFLVTITNSG  
TRHALINDPVLKISGGPSVSVTLSDDLLKAIQQQNLLAGNVRKFFIPYDNVSPNANYSGA  
LSATIE\*

>SPBDM4\_v1\_50357|ID:27158720|nadE| NH(3)-dependent NAD(+) synthetase [Uncultured spirochete bdmA 4]  
MSEKERIIEFIKTQIAAYGFGGAVVGGISGGIDS AVVGKLLTEALGKHNVFGLLLPERDS  
SKTTIADSVMVCEFLGIHYSVRNITPLVRKLG VYRTKPPAFLFPRKVQEEYARAQWLKTA  
NPYINDLKNSGGETNRRNLA YYRTKHRFRMIELYEAEQRGYAVVGTNTRTEYLTFGYIK  
WGDDSSDIEPIMHLYKTQVFELAKELGIPQRIIDKKPSPIAPGITDEFAMGITYGDLDR  
ILQKIELDQPLSDEKQDVVKKVREILASAKYRNIRNINLLQGET\*

>SPBDM4\_v1\_50358|ID:27158721|galE| UDP-glucose 4-epimerase [Uncultured spirochete bdmA 4]  
MKVLVIGGAGYIGSHVARLLADKGHDISIIDNLSSGTEENLFPKYAFSKGDILDYPWLVS  
VMKQGYDAVVHLAAAKAAGESMIKPEKYATQNLGTINILNAACEAGISRLVFSSSAIY  
GEPKYLPIDEAHPKDPANFYGFTKLEIERCLAWYDRLKGLRFAALRYFNAAGYDPEGRVR  
GLEKNPANLVPVIMEVAVGLRPHLEVFGTDYPTPDGSGVRDYIHVTDLAEAHCAALMRLV  
KEPQSFAVNLGSEHGLSVLEILETARKITCQPIPAVITGRRPGDPAKLVASSAAAKLLG  
WEAKHSDAETIATSWRAYAQHFHERERP\*

>SPBDM4\_v1\_50359|ID:27158722| Diaminopimelate aminotransferase [Uncultured spirochete bdmA 4]  
MTTLAQIQQLDSQEKGIIELETLTSHPALAPESDGTGEIEKAAALETWLKEQGIVNIQ  
HFDAPDSRVPSKIRPNMVA TIPGKRQDSPVWIMSHLDVVPEGERGLWESDPWKVIAKNGK  
LYGRGVEDNQQLVSSVFAALAFFKLG VVPERTIKLLFIADEEVGSKFGIQYLLEHHHLF  
GKDDIIVIPDGGSSDATEIEVAEKNICWLKVTTKGKQTHAAMPDKGANAFLAACDLALRI  
HRLEKSIFTARDSLFPDRSTINPTKKEANVPNVNTIPGEDVFYVDMRILPVYPVAAALE  
EVSRLAHAIEAEYNVKIQLDVVQSTESRATPAGSPIVGLLAEAVRQVYGVEAKPIGIGGG  
TVGAYLRKAGFDCVVWSRMNETAHQPENADIANIIGDAKV FATLAMMP\*

>SPBDM4\_v1\_50360|ID:27158723| Lytic transglycosylase catalytic (modular protein) [Uncultured spirochete bdmA 4]  
MTKIRYIGILVSLCIAVSFASAKGVEGATSLPAVSSDVLGSSASSEMSAGGSPAAPAPL  
PQSVPETQPTTVSPDAAAEIASLESSESPEEPQAAPLEENGEEDLSQLQPEELTIEE  
QAKNLQYDIPMPWSHELFEKYRQYYLSDKGRKILLSTMEKAAPFMDYIQSKVTEYGVPE  
LAYLPVIESAFSPFAVSRSGATGIWQFMRNSIGGYGMTITIEWVDDRRDFMKSTDAALNKL  
IDNYNDLKDWPLAIAAYNAGLGALRRAVDAAGGDTDFWNIYDKGLVSRQALDYVPKFLAV  
ASILRYPELYGLELPSSHIRWEAIPDRQVDIKLLAAKAEIPLDTLKLGN AELHYTITPP  
ENAHLLKIPADKSEEVKAILSDPNAPLVRYEYKVKEGDTLTAISKRYGISISMIKVN  
GLNPDRKIGQKLMIPSLQPLQSSGSAGGAGGARTAIHTIQKGD TLYGLARRYGTTAQ  
KLANLNGIYLDVLRIGQKLKVPAAAP\*

>SPBDM4\_v1\_50361|ID:27158724| conserved exported protein of unknown function [Uncultured spirochete bdmA 4]  
MRKAQKGRATILCMLSILIVLSLACNSDLSVPPFSRAHEFSVSNKAQEKYLRDALEIFH  
SPELKKSGYYPVQRMLAARRISTILIEDGQEARAARFLSSL SDEHDA YEAWYLFAAGAVY  
ESMNSGPVARLFYERILNTLPDMTIEGQSIHRTCLAKLLES DSPPAKKIGWYRDFIQRFP  
DADEVGPFHFLAKEYEKLG LWSQAIEEYRKFLPYFGVSVPGYSDAHDYARKMVEFNDSP  
KDWTYANLDDLKGVKRAIAARSPQTLRKYMSKAGFFAMSWYKEGGEDS NSNVLFNFSNF  
MTRGSIYVAPSLDPSLNDSEAF LR TSGWTGYIPVWYLCFRKVNFPADPKVHGNWEWAGIY  
FGEKMQ\*

>SPBDM4\_v1\_50362|ID:27158725| exported protein of unknown function [Uncultured spirochete bdmA 4]  
MKIRFRFSAAIRNIFLVSIALAGMLALVPGSGYAQQAMPKIDTEQLKKITSESSDLEAL  
IVLATPQSIAQAQARIEASQYLSAPDKVALDAFARNVGLIVYGAKDTRLEIPAAAQ GASQ  
KYITCLVGLADASSGEIPRIFQNAACSTMSEFISSLTFFRSSRNETRDQAL AALGRFEAL  
GSVSVVPMLIKQIALESKQYGDSAKNFQALALDQQSQKAAACGLARASLALGNPEGAKK  
ALDPIVTRAGAGTADIAGQAGAATRPGLSSDYKSLYGMTLYSFNDILDAEPWLAAALKDD

PTRTDVLPPLAKAAMQRRDYPAAWRYLESAAKTASQDRTWLVLSQYALENSRQYDAERF  
ARSAVRYFPKDPVAIAQLILALQISPDQARHLEAAELAKVVLELTVNQANLTPFEQARR  
AQARDEALQFLVSESYNQDWAANYIHEAGSAPLDKEMVATILRKSGNVQAAVQFASS  
WYARDPNSEKAVEAYLRSLAMATGGGLASAPASDVHTGLGIAFSALGVGQGSANSAIL  
DMVVKFIAAPFSKELKSFLYYMSASLQDDENKAIDQLKDALAERADNVEALVSLASIYLD  
RYNRQSDKSDTTNRDKALRYLTQAKALNPTDNDLRARISQLESQIK\*

>SPBDM4\_v1\_50363|ID:27158726| conserved protein of unknown function [Uncultured spirochete bdmA 4]

MMKSSRNNSIEEWGENREKVN SAVRGGPLKIESYAANDRPPAGYDPDIACFLEEIYAVC  
NRFERLELDPLAVVRRYSAPGDIEVAGLVCSTLAFGSVELIMRACETALEPLGAQPAEAL  
CRMNQGDIERVWGSFQYRFCFKDMIALMWAIRKALREYGSLETLMKGDGGLMLGAASA  
FVRNLRRFAREALPSGLRKNLLPDPADGSASKRFLFLRWMVRRDEIDPGCWNQVNP  
IVPMDTHMIRTCTERLRFPLGRATAAGGGAGGGRGALNRAPAPSVNLRAALRVTEAFRLYA  
PDDPVKYDFALTRPGIDPRPGDERFGCR\*

>SPBDM4\_v1\_50364|ID:27158727| protein of unknown function [Uncultured spirochete bdmA 4]

LSDISFALTTALSPCYFIQAFKRHIRAIAQVSVQVWGTWGRQFESGLPDYYFVF\*

>SPBDM4\_v1\_50365|ID:27158728|alkH| Aldehyde dehydrogenase [Uncultured spirochete bdmA 4]

MVIPDKRHLVELFESQAERRWQLAATGPAERIARLKKLRAAILARSDELYAAVKADYKGP  
AFEAWLTEIFPSIEEIDCVTKNLASWMKGKRSKGTLLPLSSTRVLYEPKGRVLMSPWN  
YPFQLLIAPLVDAIAAGNCVIAKPSNKTPTHAAFLADLLENVFPPEEVA VVEGPGSTIGN  
LLELPFDHIFFTGSPSVGAKVGEAAARVHAGLTLELGGKSPTIILAGARMEETARRIAW  
GKFLNAGQTCIAPDYLFCKPDSVRDFAAALQKTVESFYGKTEEDREASPDLPRIVDRAAC  
SRLQNLVSDAVSKGARLEFGGRFDIERRYAAPTLLTGVRPDMDIMAEEIFGPILVPLPYD  
SLDEAIAFIRARPKPLALYVLGRDKKSAERIIGSTTSGSAAVNDLLVQIEKLDAPFGG  
MSGTGNYHGFYGFRTFSHERNVLYQGPFSAVEKFYPPYDSPAQKRLWGALKAVKRLNR\*

>SPBDM4\_v1\_50366|ID:27158729| HD domain protein [Uncultured spirochete bdmA 4]

MEGRDLFVSVLEQMPDGLIVLDNNDKVVFNKAAEKISDIKKESILGVDVYQCHPEHEKE  
KLGKALDYLKNNKHEVRRIFHNETNNTTQENLYRAIFDEEGEFLGSLVMTRDISEKYDLD  
EKKLLLIDQMDDKIKDLRARFQNLFLSSLETLVNTLEAKDYTKGHSMRVASLCERFLER  
ESLMVPLKQNIIVAAKLHDIGKIGIKESILMKNNDKLTAEENEQMQQHPITAKILEPMD  
LKDVEIVRHHHERYDGTGYPDGLKGNAPFGARLLALVDAFDAMTSVRPYRDSLSFEEA  
VSQIRNNLGTQFDPQLGEKFLHLELGDLDLPDF\*

>SPBDM4\_v1\_50367|ID:27158730| putative ABC transporter substrate-binding protein [Uncultured spirochete bdmA 4]

MKKSRIALCFLIVCLFSTAVLSADEVKLTIWGRDIPDSDADHAYVHALINGFQAKYPD  
KIDYIALGDPGLADKTKITMATGSGLPDIFQWGGSVMGYADAGMLFDLTNELKGIPCS  
DAARQAMTWKGIYGVAPFFAVAGIFVNEGIFKANLKVPA TIEEFDKVCDAKAKGIQP  
FACGEKDKWPALALYMYLTNRYGGDASAKAAARQIPYDSDAFVKAQLYQSWIKKGYFGA  
TPLGEGYGDAQQLMATGKAAMHITGSWMCAQYANSEFTDQTIGFYAFP AFKSGGVGTVND  
IMGQTDIGFAATKVAASKKDAVVKFLKYAMSTEACEAEPGRICSVPGVKAKSSLTAQAAA  
VFATAKTVTFWWDQDLPPSVTSPLNDMLQTFPLPGADVKKSLSSFEALCVENIGPVKK\*

>SPBDM4\_v1\_50368|ID:27158731| conserved membrane protein of unknown function [Uncultured spirochete bdmA 4]

MEIVEGKTSFAGKKKHKKKDRNRSVFIFFCILPAILFLVIFLYYPIEETFRLSLTKTTGL  
SKEVFGTDNYQRLFHDEEFFAGLKHVFSWAFWSIVIQLPLSFFIAFSLTYYSNRFTRPL  
QAVFFLPNVLP SAITAMLGKFVFAPNYGLIVSLGKVLGWKWLASIDFLGNPNLAFWAIFA  
IATWAYS GFYVIYLM SRIEQIPRELREAAELDGASMWSYARRIVLPELNYPLRILAVLCT  
VGLSLKFLDLPNMMTTGGPGNATVTLGITLYRHGFINWNYGKAAAIGVVIFVLSLVFTILQ  
FSLGRKKDEAI\*

>SPBDM4\_v1\_50369|ID:27158732| putative ABC transporter permease protein AmyC [Uncultured spirochete bdmA 4]

MRMRREQSAGRGRSSSRVHYGMSEIITIVLVLA VITIFPLVPLLFAFKTQLEFAYHP  
WAPEALRWNNFAEAWKAVRIDQGLLNTLIVCFGSILCTIPSAVLAGYVFARYRSRVTEI  
LFYAILIGYFVPVQMVLPYRMEVSLKMNDTLYGLFLPMAAFGIPFWTLIYRSFFKSLP  
RELAEAASIDGAGHTKTFFRVMLPLAQPATVLAVLQVFMGAWNDYLLSLILLSQNKFTM

QLRVASFLNSYGTDRMPRYAAA VIISALPTLIL YLVGHRWIIKGMLS GAIKE\*

>SPBDM4\_v1\_50370|ID:27158733| Non-reducing end alpha-L-arabinofuranosidase BoGH43B [Uncultured spirochete bdmA 4]

MKYRNPVLAGFHPDPSICRVGNV FYLATSSFH YFPGIPLWRSDNLVDWELAGYGISRPEQ  
MDLAGTRASRGLYAPTIREKDGRFYIVCTEVDRLGNFAITAPAIGGPWSDPVKIAVDGID  
PSLFFDDDDGVYVCASCDVGGRRGITLSVIAPGSGTVRGGPRLITRGSGGRWPEGPHIYK  
RNGLYYLLLSEGGTEYGHMLAVFRAISPWGPYESCPNPVLTHRNLARSPICVGHGDLV  
DDAAGNWWLVCLGVRPIGSLLLHNLGRETFLAPVSWDPDGWPIIGDNLISLEMDGPLPG  
MPQNDGPAGVIQPDRRGGDGRAWNWRDEFD GARLSPEWNFIRARQPSVATIEKGGGLVLS  
GGEAGLSEPLAAPAFVGRPQQSFDCLFEAAVDFDPASEKSEAGITAYYDDSYHYEAFITR  
HAGSRVIVLRKHVHDIEVA VATAIPDTGCVRLSVDANRERYRFSYSCNDVGGELGLGMT  
AGLCSEGTWRMSFTGVFFGLFCVQ GKAFFHDSSCV DLEGTSCYPRQ\*

>SPBDM4\_v1\_50371|ID:27158734| Histidine kinase [Uncultured spirochete bdmA 4]

MLSSTMMQDKRKKSSQHVP TVGFLAARFDEAYQYAVWSGA ADEAKSLGISLVFFGGQORIS  
SPIGYEALDNIAFDLAKRCDIEGLIVMSNVIGTYISNKEQADFLHFFHDKELVTIGVEFK  
GIEGVCVDPSGGMSSIVEHLVHVHGRKRFLFLAGPKGHIESDERKAEFLQRLSCLLPEAK  
PSIVHGDFD DDDACARVNEFLDAGGTADAIVAANDQMAFGALASLSAHGLSVPSDVSLTG  
FDDTEDSRFSDPSLTTVRQP VAILGHMAMRHMAAKLGLVPKEPSVRLPVSCIRESGCR  
YSPDQEETRPGGSALPLESGEEKLPPNTEQE CRHFVSQRLIVEKRAAILSEIEASLISSF  
SMEDILREIARSTRELGISSCWLSLFDSSDFPPVWSRLFLAADKKTVRILVPQGMCFRTA  
ELVPGGLPEK WDSYVCEPLCFGNDR LGYLICTADSTDRMYAALRDQVSSAIKGAMLMTA  
ERNKEKDLERSVHLRTLSTNSRLVEEMERRKSLERELLDISNTIMGDIGRDIHDNLC  
QDIAVLGIMAAVLEGKLARLGLPAEAGEASAIARRS GEIAAKAKDMARGLYPAEVEAKGI  
ISAVESLVVMARERNECRIRFEVTKGFFVRDSQKALQLYRIVQEALSNAV KYAKASEIKV  
GLYADRENITVEVADNGIGLPKNAGEEGGLGFHILKYRASVIGGELRIRSSGGEGTTVTC  
RVAR\*

>SPBDM4\_v1\_50372|ID:27158735| Two component transcriptional regulator, LuxR family (fragment) [Uncultured spirochete bdmA 4]

MSLHPTFIVIDDHPLYRQGVMTLIRQELHLECVGEAGTISDALELLGRTKPRLALVDISM  
QNQSGLELIHLIKREYPETMLLVSMHEENLYGERALKAGARGFVMKHENPSV LLEAVQK  
VLAGHIAVSEDLRQRMLERIVVGKQDVIDVSR LSDRELEV FVLIGKG\*

>SPBDM4\_v1\_50373|ID:27158736| Xylan 1,4-beta-xylosidase [Uncultured spirochete bdmA 4]

MAMAVRVP EIDYYS LHGIWGAYASLVLGRIGKGAGVVVGDV RPPDRGLFVGYRIGNDEPR  
LLPFASGKDIAAGASAYHADEDM PAREESGLRYLSYFKPEEMERRLSFSGEEWRAGALS F  
RVISFFGEIPDPQSMTPASARSALRPAIFLQLTFDNTANENQMIGLFGMQGIRRPLSDIT  
NGLLGMACNNCLGFAIRPDIGIDEVMDWSVIDAAFNGNRPLRRLAQEGGLRFRIAPGQK  
AQYVIALGVFREGIVTTGRPAHAYYTCLFKDIEDVLENALDEQVESLFRAERLDSFLDNS  
GLSDDRRFIIAQA AHSYVANTELLLSQS GEPVFLVNEGEYQMMNTL DLTIDQAFWEARFS  
PWTLRSELESFGEYSSYRDSLGI AFAHDQGVDDCFTPSGCSVYEMPGLTDCFSYMSYEET  
LNWLLTACL YVNLTG DWNWAKERRKLLSACLQSVRVRDGNNDGVM DRDSDRCEGGAEITT  
YDSLDP SLGQARNNLYLAVKSWSAFVCLGALFRRIDRGESPDAQETDRAAALVAATLTQK  
MQGRKGYIPAIFESDNQSSIIPAIEGLVYPVFCGASEAIAPDGPY GKL VQVLREHLDTVL  
VPGRCVDAESGAWKISSTSRNTWLSKIFLNQYVAEHL LGFKDERVTDDHIYAYWLRTGSA  
DFAATDQVDSSSGKALGSRFYPRLVTSILWLG TPLSSGSSRESEAA MR\*

>SPBDM4\_v1\_50374|ID:27158737| protein of unknown function [Uncultured spirochete bdmA 4]

MPYQFLLSGIGNTTEEGVVVAWFKREGSEVQEGEPLLEVQVAKTSYEIPAPVSGRLHRIV  
APRDTIVKEGQLLALLLLPGEEPQKE\*

>SPBDM4\_v1\_50375|ID:27158738|acoB| Acetoin:2,6-dichlorophenolindophenol oxidoreductase subunit beta [Uncultured spirochete bdmA 4]

MSNERELTMAKAI AEAISEEMERDEHV FVMGEDVGVYGGIFGATQGLLSKFGPKRIMDTP  
ISETAFIGAATGAAAEGMRPIVELMFVDFFGVCM DQIYNHLAKNTYMSGGNLHLPVLT  
AIGGGYGDA AQHSQCLYSVFAHIPGLKIVVPSTAYDAKGLMIEAIRDDNPVMYFFHKGLM  
GLGWMRYPERSVNVV PERSYTIPFGKADVKRPGTDITIVCLAMMVH CALDAAEKLAKEGI  
EAEVIDLR TLVPLDREAVIASLKKTHKLLVDE DYLGFGLS GEIAAIA ADEAFAYLDAPV

KRLAVPNVPIPYSRPLEQFVIPNAEAI AEAARSLAR\*

>SPBDM4\_v1\_50376|ID:27158739|acoA| Acetoin:2,6-dichlorophenolindophenol oxidoreductase subunit alpha [Uncultured spirochete bdmA 4]

MTPSTEQLLEMDRQAWTIRLFEEALARVYMEGKSPAFDIGSGTIPGEMHLSAGQEPVAVG  
TCAHLGQEDTVVGTHRAHHFAIAKGVLDLKKMAAEIFGKETGLGKGGKGGHMHLFDPEHKFS  
CSGIVGASFPVACGAALAAKKKEKDWWAVAVAFAGEGAANQGSFHESLNLAALWKLPIVIFII  
EDNAWAVISVAKSKSTAIPYNSQRAAAYGIPGVRVEKNDFLSVYDAAGEAIARARRGEGPT  
LIEVKTDTRYFGHFQGDPELYRPKDEVKGLKAADPIGRFEQTIIAKGLVSRAQLDKERETA  
VKA VDEAIEFARESYPPESEEALEQIFA\*

>SPBDM4\_v1\_50377|ID:27158740| putative Transcriptional regulator, IclR family [Uncultured spirochete bdmA 4]  
MAMAFQQIPSLSAQTQKMKNNDIIGSVRRALGIMELLATCPQGLNAKQISYRLRLNVGTCY  
HILNTLIVSGYVVKDPDTLLFRPSGKIA YTLCKAVSPAQIVSYLMPHVQSLQEKTHETTY  
LSVWNGKDIFLAAIDESPLSVRVKSLTLGYDEANHAIALGKAILAHLDESQLDNYLIDHG  
LERYTSNTITSDDLLKEHLMVRRHGYSLDSEEFLLTDVCCIGAPIFDAQGGQVIASIAISL  
PSTRYHNLGDTLIPYVRQSAKAATRALSILGYIRPTVASEGENRN\*

>SPBDM4\_v1\_50378|ID:27158741|ppiB| peptidyl-prolyl cis-trans isomerase B (rotamase B) [Uncultured spirochete bdmA 4]

MSNAFVKFETSKGPIVIEVFEDETPITAANFIEYVKSGFYDGTIFHRVIPGFVVQGGGMV  
SGMEQKTRPPIANEASKAPKNSRGTLSMARTMHPDSATSQFFINLVDNRSLDYRGP GPG  
AGYCVFVGKVIIEGMEAVDAMAKVKTGQRPPHADVPLEDIVLVSARVVEPVRN\*

>SPBDM4\_v1\_50379|ID:27158742| Glyoxalase/bleomycin resistance protein/dioxygenase [Uncultured spirochete bdmA 4]

MQFCWVTINVDHMEKSLAFYRDIVGLPLNRQFSPMPGDHIAFLGSGDTEVELIHNEKNAP  
APFSQNISLGFKVESLEKTMEMLKAHGIPVLAGPFQPNPSIRFFYVHDPNGLRVQFVQDV  
K\*

>SPBDM4\_v1\_50380|ID:27158743| MscS Mechanosensitive ion channel [Uncultured spirochete bdmA 4]

MNSTILPDFINNLFKDAFTPEFWRKA FSAIIAAVLILGAFRILQAIATRMTKKNMPEQKA  
QLVKKAIHYTGWAIAIISVLESMGVNLSALLGAAGIAGIAIGFAAQTSVSNLISGIFLIS  
EKPFQIGDVIQVGDITGIVMSIDLLSVKLQTFDNRFRIPNESIIKLNVNTNTRFPIRR  
DVWVGVSYNLNLKVTEVLKDIAANNLYALDNPAPLIYIDKFDNSSINILFGVWFQSKL  
VDLRNSIIIDIHTRFAEEGIEIPYKRDVYIKGIVDTQIPDVRKDMREQNVGTNT\*

>SPBDM4\_v1\_50381|ID:27158744| conserved protein of unknown function [Uncultured spirochete bdmA 4]

MMYRMWSFFEPKDSQWYRWKLDGASLWMHKNGEWRWFALNSLPFKHLQSDASGPEPAEPP  
ADISVSLAVAAGRKAALHPHSPMPYLVSARNVDVTIHPGTEALFTIALPPVLRVELESGY  
ALYEGSPFTTTYTWFGDKTSGNLCLSLPIELDPECKNEQRAFDSASGAPSATNPVYPSIE  
EPLRRAAQYLACQSLIHCKIVVKNKSKEPLEVKRLAIFTDL MNFYEKAGTLVSDMVFITG  
TSDGSLQTNIDDTGFKNLHKIHTASKTGLNEVLIMRGVSFLRNIAGL\*

>SPBDM4\_v1\_50382|ID:27158745| Class V aminotransferase [Uncultured spirochete bdmA 4]

MKGKRLLMIPGPIEFTDEVLDEMSKPTLSHTDPQFIEEFGQALEKMRAVWLAPHGQPF  
AGSGTLAMELAAANITGPGDNVLIVHTGYFSDRMADIFRLHGANVDIVPGAVGDLPKVEA  
VRVQLKAKKYKTL SITHVDTSTGVRADVRNLAAA AHETDLVVVDGVCAVAGEELRMEEW  
GVDIAFTASQKAVGVPPGLALFVASTKAIAAFKARKTPVRAYYCDWQYWLPVMQAYEAR  
SAYFGTPAVNLVRALNVSLGQILAE GMDARFKRHSRNARAFRAGLSAIGLKYVPVREDIY  
ANTLTAAYYPEGIDASILPRIAEEGVMLAGGLYPSIKTKYFRIGHMGMSDASEILATLGA  
IERGLAKAGYAFGVGAAVAAAQA EYKKS\*

>SPBDM4\_v1\_50383|ID:27158746| Dinitrogenase iron-molybdenum cofactor biosynthesis protein (modular protein) [Uncultured spirochete bdmA 4]

LRSPCLLSAAQRLRHKSMRPPCCVRRRIASEIRACSI VPFMEDAELA QKLFGGAELIVLE  
PDEVEALRLADLESLYQEQAARMMGISRQTFGRILERVHRKVADALLNGKALKLESRTQN  
SIQSLKEKIMKVA FVSDDGKTISRHFGR AAYVVLTVDDGKV VQKEQRPKLGHGNFAGQQ  
EAHHEHGATGGHGFEPGAQERHAGMVQAILDCKT LIAGGMGAGAYASIQGAGIEPIV TDM  
QSIDDA AAA YLAGTLANHMEYLH\*

>SPBDM4\_v1\_50384|ID:27158747| ATPase-like, ParA/MinD [Uncultured spirochete bdmA 4]

MSLIPEKKQNPSVKRVVGVVSGKGGV GKS MVASLLAESFASRGLKVGLLDADITGPSIPR

MLGVDSFRGESDGEHLYPVENEELIKVLSINLNFNEKEDEPVIWRGPELLAKAIDQFWSDTI  
WGDLDYLIIDFPPGTSDVVLTAFTQITFSGIVIVATPQDYVSMIVRKSINMASMLKTPVL  
GVVENMRTMVCPCGSEVALFDDGTQNGAQRMGPLLLASLPWRKDLAQSRALRWSALGDA  
IRKDADSLANEVELALASVSAVGSAAQA\*

>SPBDM4\_v1\_50385|ID:27158748| conserved protein of unknown function [Uncultured spirochete bdmA 4]  
MARYRNLVFKGGGVRGIAYLGALKYLYEQGFMRTIERVAGTSAGAITALGVALFPSDFAQ  
FKHMADSLDYRKVPSEDEHTNKLANKRLLSLTEHYRELALFKNLQCSIRLLQEKGWYSS  
DYFYQWLRSIIAERFTVAKEAYTFADFSNPEIHKDQVFPQLYITGTDVTNRTRTLFSSE  
TPDMEVALAVRISMSIPLFFEAVQYQFPGTDEPQFYVDGGLMWNYPVNMFDDRKYARKL  
ADGANEETLGLFLYSSSEKTRYKPKVSMIDYMEALVESASLVQEHLVVRTEKNYSRTIFI  
DDCGIESTDFDIELDDPRYKSLFDSGYSATSEFFESRSEWSKFFSSLKERLGWKE\*

>SPBDM4\_v1\_50386|ID:27158749| Regulatory protein TetR [Uncultured spirochete bdmA 4]  
MEENHPLTKRKLQARETRKRILESALSLFREKGFQVSDIEITSTAGVSKGSFYTYFQTK  
SDIIIEFRLIDYFYEKKEAVILRNPDAASRLIAFTRHQLDYIHKNMGFRTLSILYINQM  
STFYDQKILANRERLVRIVSKIIAEGQAAGQIRQGDVELAEWMNRCMRGFFLDWAISK  
GAIDIRKDGMRFFSEFVLPALCTKQMA\*

>SPBDM4\_v1\_50387|ID:27158750| conserved protein of unknown function [Uncultured spirochete bdmA 4]  
MKLKEVVAVVTGGASGIGETVAKYFASNGAKVVIGDVVQESIDRVVAEIKAAAGGEVVGLK  
TDVTKDADVAALMDAAVSSFGAINVVPCAGIIRDGVVINTDRETGKVKRVMETDQFRTV  
IEVNLIGSFITLREAARRMVDNKWQGVLFITISSVNVKVGQVQINYSSTKAAVAIWPHILA  
GEFQMKGIKIRVMSIAPGYVGTMPVKGMNQDALNEILKDVHIARLIEPEEIARAIAAMVV  
ENEAFDGTCLITGGVITYGARSIAK\*

>SPBDM4\_v1\_50388|ID:27158751| Zinc/iron permease [Uncultured spirochete bdmA 4]  
MKVENPILQALLATLFTWGVTAALGAAMVFFFKEINKKVLDAAMLGFAAGVMIAASFWSLLA  
PAIELSEAMGLIPWLPVAVIGFLLGGAFLFGVDHLLPHLHIGANMNEAEGIHITTWKRSVLL  
VLAITLHNIPEGLAVGVGFGAVAAGIPSANLSGAIALAIGIGLQNFPEGAAVSIPLRREG  
LTRWKSFVYQGASGLVEPIAGVLGAALVLAMRPILPYALAFAGAMIYVVVEEVLPEASR  
ESNGHLATIGTMIGFALMMLLDVALG\*

>SPBDM4\_v1\_50389|ID:27158752| NAD-dependent aldehyde dehydrogenase [Uncultured spirochete bdmA 4]  
MNNGIFHVPTLGNPVEFGYAPASPERAALKKEIERLRATHFDIPLIIGGKEVRTGKTAPI  
RRPDAHKEVLGVYHCAGEAEARMAVEAALAAKAEWAAFPWEERA AVFLRAAELISVKHRA  
LMDASTMLCQSKTAHQAEIDAVCEVIDFLRFNPLYMEQIYAQQPSNAKGEWNRSA YRPLE  
GFVYAVTPFNFTSIAANLPTAPAMMGNTV VVKPASNAVYSNYMLMKLYMEAGLPPGVIN  
LPGSGGVISSVALSSPDFAGFHFTGSTEVFRSLWKQISSNLERYKYVYPRIVGETGGKDFI  
LIDPSADLQSTVAAVVRGAFYQGGQKCSAASRLYIPASRSREFTDGLAAEITSIPMGEIT  
DFRNFMGAVIDEAAFNTICDYIGRAKASGNAHIVAGGRCDKSKGWFIETLILTEDPHSE  
SMVNEIFGPVLTAYVYDDRDMEAAAYKLVDATSPYGLTGAIMATDRQRINRALLALQNTAG  
NLYINDKPTGAVVGRQPFGGARASGTNDKAGSYLNLRLRWSALAIKESFVPPSSWRYPFM  
MGND\*

>SPBDM4\_v1\_50390|ID:27158753| conserved membrane protein of unknown function [Uncultured spirochete bdmA 4]  
MVQKTKTLNAFVVVVMLGLFLAGMIEGNIQTFQGGFRLQVTPARLVSDFIAVEGVGPTL  
LNVAAVGLLGYL FVILNGLQITGAEVAALFTMMGFAFFGKTLFNCIPIMIGVSL SALIVK  
KKPRDYALIAMFGTAMGPLITFIAFELGMRRIFALPGSFVIGIGIGIVLPPIAIAMLRLH  
QGYNLVNVGFSAGFLGLFTASLSHAAGADILPLSMWSTAREPLL VAILPAIVLIALLCIV  
AENPRHVGTGFGAEFRDFR KILTMSGRLPSDFADYVSSKGSLLNAAIMGILFWLG VVLLD  
APLNGPVLGGLFTIVGFSFFGKHPKNVFSVVLGIVVAIIIFGKDIYTPGPLLAILFGTAL  
APLAGEFGPIVGFIAAGFLHLVIVDRTGAWHGGMDLYNNGFAAGLTATLIVSII EWYRSAQ  
DE\*

>SPBDM4\_v1\_50391|ID:27158754| conserved protein of unknown function [Uncultured spirochete bdmA 4]  
MKRQELYVQLISELANYLLHGNPKKMVISMHLEPDGFHAGIDDRPRTDKEIADIEHSLM  
MHQRPELASYYGMMVGHDLGSSRLELIGFQIKGVKVERIPEGGVMINLWIGSEGFD PAM  
FTIDQEPQGS\*

>SPBDM4\_v1\_50392|ID:27158755|sbcB| Exodeoxyribonuclease I [Uncultured spirochete bdmA 4]

MPATILWYDLETFRDPQHRIAQCAFIRTEALEEVGPPLVLYCRLPPDYLPDPEACYI  
HGITPQEVEQKGLSEYEFALRVMHEMSVPNTTVAGYNSIQFDDEFIRRLFYRNLLDPYTR  
EYRNDNSRWVDVINLLRAVHDLKHEGFHWPNADGNPSFRLEELAKANGIAHENAHDALFD  
VRATIGLARKVRTAYPRLYQWYFQHRRENLTPLVNLSLRENMLVHTSQLYTRANGCSTV  
ITPLGLIEADRHALVAYDLRFSPGPFSPMSEDELDRDLLFTERLENGPARPPITMIRLNSC  
PYLAPVNVLNKQSAKRLKIDIETCRQNLELEAVPGMKERLIAAYRYEKKPLDELDPPEYA  
LYGGGFYPDEDRRELDRFHEVLQSRGPHAAKNEFLRVQFRDSRILTLMGRLLARNFPETL  
TAEQHLSWRKHAYGWVQLPLEKGATALADYARLEEQLREMSAEDPHRRIASALLEWKEKI  
EKFIREQ\*

>SPBDM4\_v1\_50393|ID:27158756| conserved exported protein of unknown function [Uncultured spirochete bdmA 4]  
VKYRYGLVIVLVVAGIAAAQTVP SDKTMLIKLERTA VRTAPSFASPVLVFAAYRTPFA  
VIRTENDWVFGYVQGSVPGYVHVSA LSPVKLSLSADAVSEPPALQESEIVLAGKGFSSS  
LETALKEGNAFNFDAVDDMVKLTYSYAECLAFIQGTDISPGEL\*

>SPBDM4\_v1\_50394|ID:27158757| putative Peptidase, M48 family [Uncultured spirochete bdmA 4]  
VYKGAARSMLAVSLIILLTASFLT SCTVSPEALQLFLNQALLQGMVTPEQARLIREAAR  
SFQTESRPFTYEEYEAIGRVVSAAVLSQYPVYNQPELTAYVNKIGQGLAFFSARPLL PQG  
YHILILDSEEAHFAAPGGFVLITRGLLRLATSEDM LAALLAHEISHTALGHGLVSLASY  
RMGDLAMYAELSTQRANS DNKEAAALFSAAVHDFVSLISVQGY SQTMEFEADAEAMRML  
YEAGYRNSALKDFIHVLANSQDERIQQYSMQHPLPAERLTRIGVIERQYAQAAHAARQE  
RSRRAASLLRAESESMDIGYPAAARSVFELGAEMADGEATR VAPLELIRQRRFEAMQQLF  
\*

>SPBDM4\_v1\_50395|ID:27158758| putative Adenylate/guanylate cyclase with Chase sensor [Uncultured spirochete bdmA 4]

MARRARSLALKSRSTMNRRARFLCALAVGIAATLVFLWIGASEKLGMAVYDSQMRALVRA  
KGQSVAAAPSQTLRKIQSTSNSQNSIAPLNTTTSIVLVMIDQSSLDWVQKELGLGWPWPRE  
LYGVMASYLRDARVQAYDILFTEPSTFGPEDDARCSKAMTEAGNVVLATLVNKKAVLDVP  
NAAFGHVAALVDADGICRKYQVWFDRDGERISLGLAAMEAMGAGDAIPAHGEALLKFEN  
PSRFERYSAAQIIAASFHGS DKSPSIDVHDKIVVIGLTA PGLMDRQATPIDSALPGMEVH  
ATFISDALSSSFMERLPLWVEILTAVVAAALVGYFPLLRRKSLAALGIAAAVCIPIALS  
LLFRYQIFYNPVLALASELFAFIAAVALGYGAEGRQRAYLRRFAQYLSPEVISALVERP  
ETLRLGGESKIITLFS DMAGFTSISEKLDPERLAQFMNEYLGIISEEVLAQGGTLDKYV  
GDAVVAFWNAPLDTADHAYRALVA AVHIQARMRMSHEFEQRFGISPRTTRIGVATGQAVV  
GNLGSSRRFA YTA VGDSVNVASRLEAANKAIGTSILTMQDTVVSAMGAESTGQLAPEVKS  
KLSEGGDLILRRLGPALVEGKMQPIELWSVEMIDPDGERPLVSI EPWVEIRHFSK\*

>SPBDM4\_v1\_50396|ID:27158759| putative Energy-coupling factor transporter transmembrane protein BioN [Uncultured spirochete bdmA 4]

MANRLANPFAFEPGKSALAALHPLAKLGFLLAATSVAMQSHVGVLLGLFTVGFLFLIRVP  
RVAGGALFSILVLVAF AALVRGALPGDGR LFDAATLPDSGVYALRLFTVYVYSRLFYATT  
RVSEIGDWMTAGIRAIRRPFRRGRTKAKKSEPGILGDPGMLFSLVLLFLPRIFD TYQRIRE  
AGEVRGIMLSGRNLRSLVMLEQLIVGSMVQAWRTAVAMEVRGYSPPRSIWLSAFAGR DW  
GLLGLATALLFLKMI\*

>SPBDM4\_v1\_50397|ID:27158760| Polyamine-transporting ATPase [Uncultured spirochete bdmA 4]

MPELFRAEALQHLFPDGKAGIENVSLSIDEGESVLVAGKNGAGKSLLMRHF IGLSKPTSG  
AIYYRGEPIASQIPLIRREVG YVFQDTDAQIFGQTVEEDLAFGPANLGIHGKELEEAVRS  
ALHDAHLEGMSNRRPGT LSGGEKRR LAIAGV LAMRPRC VILDEPFVNLD FPSVQEII EVL  
KTLRAEGKTLIVLTHEIEKVFALASRLVILDRGNIVFDALPSRAKKEDFMQSGLLCPYRE  
CYPWQID\*

>SPBDM4\_v1\_50398|ID:27158761| bioY| Biotin transporter BioY [Uncultured spirochete bdmA 4]

MESINERLTKAIMACLFAALISIGAYIAIPIPGTPVPIVLQNMFI LAGFILGPWWGLAS  
VIFYLMLGAAGLPVFAGGTGGLVKFAGPTGGYLLGYIPAIIVFGLVSKLGKKTWYFNILA  
GIVGMAIVYAFGVARLKA VLNVDWTKAFATGLLPFLPGDIAKIVIAAVLAPPILKAIPYI  
EQQPND A\*

>SPBDM4\_v1\_50399|ID:27158762| protein of unknown function [Uncultured spirochete bdmA 4]

MKSFAAVDVTGTTIGASLERFQKKLAERGTSFSEFLLDAYIRKWTGEELAHALKIRTALV

LGLQEFLVSRGILNIDRVSLSPVTDPLCHSVEHVPVILFQDTPYRTTHSMIYSKMLACMS  
PHVPGVYIDSPNIRLELPSDTSRHKYLIDFSQMDIELKRTQMLSEEEYFDRPQETAMTLT  
QEWHLALDFFEDLIYSVKKILALASDDLALGVTLAVPQKPFPRFYKDEEEDHETSSLE  
RRLGEKAGVQFFWVLGLLRENYDLVYPYLSKDGKRSARASISSRQIFNYDLCAAPLYTDG  
TLGSA YEVLSSGGLREWVYDAIVARLLDNDILREAPRFDEKGNLLNMAALEGYGPFLTVAH  
MRDAKGRGLFPQVFGGGLGIERTLFALLHGPHVKDIDEITYFGKNPDKSLPFLF\*

>SPBDM4\_v1\_50400|ID:27158763| Cation efflux family protein [Uncultured spirochete bdmA 4]  
MENRTAIIQKASWIALVGNFILAFSKIFIGILSGSLAVLSDGIDSATDVLIAAMTLIASK  
ITAKPGDREHPYGHGRIETVATAIISFILFFAGSQILFNAIGGIFSGVPEKLPSTMAIWV  
TIVSIAGKVGLAWSQFHFGKKSOSPMLIANAKNMRGDVVTSAAVLIGLGLSYLTGLAVMD  
KILGALVALWILKNAIEIFMEANTELMDGTKSREPYKGFAAIAKIPSVDNPHRVRLRRV  
GSMLIIDLDIEVDPAMTVYESHEIALKVEKSIKESLPDVYDVIIHIEPRGNVEDEKFGLT  
EGDVKR\*

>SPBDM4\_v1\_50401|ID:27158764| conserved protein of unknown function [Uncultured spirochete bdmA 4]  
MDRFDVIIIVGTGPAGLGA AFELLKKKPSLRILLDDKLQVSSGGLRNDCKMNFTWPIGFPP  
ECWDEALGNFYLRVEAFLQPHIMEKRNIDIYAKRAEKIGVKLLDVRQSHLGTGGLELI  
KALTARLFDLGAEISLGEEMLSVEQSSKTVTDDKRTLQYGLIVAPGRGGFAFLQRLMEK  
LGIDYHDNVVDIGIRIETREEHYPIVRDYDYPKFLFPKKTRTFCTNSRSAHVVQERYGDQ  
KTGHWYSVNGHAWSEQRAANGLVNFAILKTVTLTQPLASGQEYAQMLGRLAVLLGGGRPI  
MQRIGDFRLGKRSFADSFTGDLYDFHPTLQTCTPGDISLCIPAKTMRAIWNALKLLDTVV  
PGVMHPSTIMYYPEIKLYANRPAFIDKYFQVMPGIYLVGDGAGTSRGITAAWASGLRAAD  
GILKSL\*

>SPBDM4\_v1\_50402|ID:27158765| Extracellular ligand-binding receptor (fragment) [Uncultured spirochete bdmA 4]  
MKKAVGIVLLTVGIAALIVACGPAAPKTVKFGVFEPLTGANAGGGALEVEGVKLANELYP  
TVKVGDKKEYKIELVIADNKSDKVEAANAQRLVDKDKVNVVLGWSGSSLSMAAGPIVKNA  
KVS AIGLSCTNPLVTKDNEYFRVCFIDPFQGTVMANYAFKNLSAKKAVIIREISNDYSV  
GLAKLFADAFKQLTGDENAILAELNYNTGDTDFSAQLTEVKKFKPDVIFAPGNYTESALI  
IKQAKELGIAVPFLGGDTWETPEFIDVGKKA VEGVVVFSTFFATETPITDTSKVFLDA\*

>SPBDM4\_v1\_50403|ID:27158766| protein of unknown function [Uncultured spirochete bdmA 4]  
VARDAIQRAGSLDKDKVREAI AVTKDYPGATGMITLNEDGDAVKS AVIKTVKDGKFFVYMA  
TVQPY\*

>SPBDM4\_v1\_50404|ID:27158767|livH| leucine/isoleucine/valine transporter subunit ; membrane component of ABC  
superfamily [Uncultured spirochete bdmA 4]  
MTLSLLFQHIVNALSLSGLYALIAIGYTMVYGILRLINFAHGDI FMLGAYVAFYGITLVS  
LPWWAALLVSIVFTAFFGVGLERVA YKPLRDS PRISIMISAIGASFLLES LGVLIFGGRP  
KGVVPDVL SRVIHFGSVSMVTISLIPLFTFALLGDLLWIVNKTKTGMAMRAVSTDIEA  
ARLMAVDVNKIVSFTFGIGSLLAAF GGIMWSFKYPQLNPLMGVMPGLKCFIAAVIGGIGS  
IGGAVLGGFLLGILEIMTV AFLPTLSGYRDAFAFILLIVVLLVKPTG LLGKRQAEKV\*

>SPBDM4\_v1\_50405|ID:27158768| conserved membrane protein of unknown function [Uncultured spirochete bdmA  
4]  
MNEATRKKTIALPRNRLYSVIAIAAFVLF AFIADRFFDAFTLRVFNLC AIYIVLALS LNL  
LNGFTGLFSLGHAGFMAVGAYVS ALLTMSPQLKDMNYFLVPIVPWLHNVTIPFLPALIA  
GLVAALVGFLIGAPVLR LRDDYLAIALGFG EIIRVLITNAQPITNGAQGLKGLPRFSTT  
FAVWAVAGLMILFMVLLMRSSYGRAMKAVR DDELA AEAMGINVFRVKVTSFTVSSFWAGV  
GGALLGHMITTIDPKMFTFMLTFNILLIVVLGGIGSISGSVISAVVV TILMEALRFLDEP  
MNLVIFKTEGMPGLRMV VFSILLMVMIIYRQRGLMGNEEFSWDMLRGLFVKKGRKGGDHV  
\*

>SPBDM4\_v1\_50406|ID:27158769|livG| leucine/isoleucine/valine transporter subunit ; ATP-binding component of  
ABC superfamily [Uncultured spirochete bdmA 4]  
MSEQTS DMLSTS QLTMKFGGLTAVSDFNLEIRKNEIVGLIGPNGAGKTTAFNVITGMYR  
PTEGRVLFKDRDITGLKPHSITSLGVARTFQNI RLFKEMSVLENV LVACHMSINTGIFGA  
TLHLPGYRARESEARRFSMELLGQVGLGHLA YERGTS LYPYGQQRRL EIVRALATKPKILL  
LDEPAAGMNPQESFGLMDFIRKIRDEFDL TIFLIEHMQVVMGVCERMYVLDYGV TIAIHG  
DPASIQKDPKVI EAYLGVD\*

>SPBDM4\_v1\_50407|ID:27158770|livF| leucine/isoleucine/valine transporter subunit ; ATP-binding component of ABC superfamily [Uncultured spirochete bdmA 4]

MLKIKSLSVHYGGIHALQGIDLSVPEGKIVTLIGANGAGKSTTLRSIVGLVKPTGGKVLL  
RDAVISGKATQEIVQMGVVLVPEGRIFPNLTVEENLLL GAYARNDKEGV LKDINH VYAL  
FPRMKERRTQKGGT LSGGEQQLAVGRGLMSRPKLLMMDEPSLGLAPLIVKMIFEI IKQI  
NAEGTTVLLVEQNAKAALEVADYGYVLETGRITLQKGGQDLLQDDRVRKAYLGEVQ\*

>SPBDM4\_v1\_50408|ID:27158771| membrane protein of unknown function [Uncultured spirochete bdmA 4]

MKFLRLIVPWLLVIVILAALYLPDLGPENYKDFDSL FANERVRQGIAGYEIAI IKDGEI  
AFNEAYGFDGQRKPLEKSTPLYLGPASEILTGTLLCQFVNEK KIALDVPIAQFIPDLASL  
KAKRSGAASLDMP LTLRQLAAHRVAFPEKDL PDYDPEATGLEAGLPDPELFLRSHFPTEN  
YTRSRLSYRIVGAILEKVS NRKYSDDLLESMITPLGMHLTTARPS SIENIAVGAGSFFGL  
TFPYLEKVPYDAAASDGIVTTS EDMAKFLKFVVS PERGQNIPGLASSQTPLLYQALYKDG  
DTGFGWRIVDSK KGRYIFQGG SIRGYSSRIVIYPERNA AIVILTSQDGV IISNFFLPTLV  
SCAEQILFNGESRRPFPTQRAELVAGFVFLIYLLSKILQIQSSYSWARDLLKYRETGISQ  
LYARLVLRVTHIIGLLL RILIVVLAPV GALALVGRPVSYQELIAFEPGVSSMLMTALLFGA  
FRNISRLVMIVRLRRS\*

>SPBDM4\_v1\_50409|ID:27158772| protein of unknown function [Uncultured spirochete bdmA 4]

MPSFTPSMSEIEIAVPNLLLGLSRALLRAE EPGDAIGDFLSELSDILHGQAYAACGR TSH  
DDILRYVAIGGKEITL FASVAELGQEVRLGSLPCGLALEADEFIQK KLNGLSLLLEAPAKQ  
QGIIVFVLSFLLPQNAEPDVAWVASSALKSATQIIEFFALRVRLAEQMENDSGRPISAI  
PPDMDESPVSWRGIVGNSDVIREVFTMVKQVAGT DATVLLLGESGTGKELIARAIHQESS  
RAAKPFVAVNCAALPESVIESELFGHEK GAYTGAYEQRKGRFEQA HGGTLFLDEIGELSP  
GLQIKLLRFLQDHRFERVGGNTSIEANVRVIAATNRNLQEAVDQGSFRADLYYRLNVFPI  
NVPPLRER GADILLADHFVVKFNKENTK KIQRISTPALDLLMIYHWPGNVRELENCILR  
AAILSVDGVIHAYHLPPSLQSAVSTGTEPATGLDAAIARLEKELIIEALKLENGNVAATA  
RRLVATERRIRYAVQRYKIDTKRFKIKL\*

>SPBDM4\_v1\_50410|ID:27158773|asd| Aspartate-semialdehyde dehydrogenase [Uncultured spirochete bdmA 4]

MINNQSRTVFS PPKKIPVTILGATGVV GQRFLRRIADHPWFYPAFLAASDRSAGKKYAEA  
CQWHLPLPYAGCAGTVV VPCSPGAASFPIVFSALDAGPAREIEPLFAAAGAYVFSNASA  
FRMDEDVPLLIPELNPEHFGLLSVQQA KRGWPGAIVTNP NCTTVMLASPLAALQSRFGD  
AVLVTSMQAISGAGYPGVAALDIVGNVVPFIRKEEPKVESESNKILGELVQSGSAASVVP  
APFVVSATCTRVVIDGHTLSISVRLKTKASLGEVAEAFRAFEAKTARYGLPSAPSQFLT  
LLDAEDRPQARKDVEEDGGMRISVGR LRACPI LDFKFVSLGHNTERGAAGASVLNAEMAL  
AMGMLYGIV\*

>SPBDM4\_v1\_50411|ID:27158774| Aspartokinase [Uncultured spirochete bdmA 4]

MTTLVMKFGGTSVGSAA RIREVARIVQSRQGSKR VVVVSAMAGVTNSL FEMAEAAARNHDL  
DRAVQLLSKIEQVHLEACRSLEIATPEVVGKIKEIVENLQRRVHGIDLLGELSPRTMDEI  
ASAGERLSSILVAGFMD CPLL DARKVIRTDSHFGGAHPRLASIKKFAALNVVPLLESYDI  
IVTQGYIGSDDADDTTTLGRGGS DYSAGLLGAAIQADEIEIWT DVEGILTADPRIVPGAR  
TVEILGYDEAAELASYGAKVLHPATVRPALDAGVPVSIRSTFRPNGMFSTISPGESSGRP  
CVAIAMRRNVV IISVTQESMTDQSGFLAKLFDVFGRRGISVDLVSTSEICVSVSLDKNAP  
LDALTQDLGKLGQVSIAQDRAVIAVVGDLLRKTPEVLR TTFVAIDGIPVDFISMGANAIN  
LSLIVQEQAERAMRNLHTAFFEGGSR\*

>SPBDM4\_v1\_50412|ID:27158775| putative 4-hydroxy-tetrahydrodipicolinate reductase [Uncultured spirochete bdmA 4]

VNIRIGIFGAGKLANAILEEAQAVNAKTASASRSPQFLIEWVVDRGDPIPAHAIDVAIDA  
SMPDAVESHLVWAIETSTAFVIAT TGWDIPDMETRIGNKTAVLVSPNFSFTVTFMRRIAA  
QLAQFADWYGEGDLAVFEHHS AKKDAPSGTAKALAQAI VSGSKRYTAWNASGWD AWDPG  
KVAIASLRAGSEAGVHEV VFDAPHEQLSIIHRARDRRVFASGALKAAQWILGRKGLFGMD  
DVLESMLGSQDAISQEV\*

>SPBDM4\_v1\_50413|ID:27158776|dapA| 4-hydroxy-tetrahydrodipicolinate synthase [Uncultured spirochete bdmA 4]

MMDNIQGLGVAIATPFDDTFNVDYTG FERLLDFLCGRDFEASAGEYARQAFSDEARRGRF  
RAFWEKESGGTDFVVVLGSTGEGATVESEERRELIQRAVERKLGVPVIVGTGSNSTKAAV  
RMTEEAVDLGADAVLVVVPY YNKPTPDGLYAHFETVAHAAHGKPVIVYNVPGRTGLNLAP



AVLSGLWNIGNVTA VKESSGNLQIGEICRTLPEGKTLLSGDDGLALPAI AVGAEGL VSV  
AANVLP RRFKALVDAARAGHRQEAKALHAQLLPFMGALFLESNPIPLKATLKMTGLCGEA  
LRLPLAPAVRG TRETLEGLAGFGARVVA\*

>SPBDM4\_v1\_50414|ID:27158777|dapD| 2,3,4,5-tetrahydropyridine-2,6-dicarboxylate N-succinyltransferase  
[Uncultured spirochete bdmA 4]

MKIAHTLEQAF AEQGGFDEA QWSAFLEALERGDIRVVEQQT DGEWQVNAWVKQAILSGFK  
KGG LSEGHWPAEGFFDRPAFP PRRFSSADGIRMVPGGRSVRRGAYVAPGVVIMPPSYINV  
GAFVDEGTMVD SHALVGSCARIGKNVHLSAGVQIGGVLEPPQASPVIVEDEAFIGGMCGI  
FEGIVIRKRAVLAPGVITKGTKIFDLVNGRAFSGEVPENAVVVS GTRPAHGDYAVRLGI  
SLSVPCIVKYRDEKTGTAVVLELALRG\*

>SPBDM4\_v1\_50415|ID:27158778|proC| Pyrroline-5-carboxylate reductase [Uncultured spirochete bdmA 4]

MQYKLGII GAGKIG EAILAGSLAKGLLPSEVILSVRTEQHRQNL EPTYHVTA VLHNRDV  
AKQSEIILISVKPRTIFDVLQEIADVISDES VVVSTAAGVTLESMQTKLTRKIALIRAMP  
NLGVS VEGEMTALAPARFTEEDKTQKV KRLFEAVGRALVLDEQYMDAVTGLSGSGPAYVY  
LII EALADGGVKMGLPREVSIELAAQTVLGA AKTVLVTGEHPAKLKDQV TTPAGSTIDGL  
MELEDGGLRVTLIKAVVKASERAHQLLHK\*

>SPBDM4\_v1\_50416|ID:27158779| protein of unknown function [Uncultured spirochete bdmA 4]

MLIEHLAQMYVHWGNPGQTGEQGRRKDQSVLALHQFLEVIEETSEDRKALFTQSQQSRRK  
AMKLSYLLLA SETEPEAIFDAFLRSGLLSSGQRSNKPEVLLWLAGTEAIARGIHPYIVFL  
IMSA YFGLAIAESEFRWLRERSKSSNIKLEEFIVPGDLTDTIGEALKEPRRLQRTIRVAG  
MPLSASAFAGCSLYYIEKILALVGPICALILTEMIISARKRLVSDEISTAQQAFDLFTQ  
EETEPKMP EERKTGLEAFEEQGLPDPDLIRTTT NIVMYAEAKILKSTLSSMSDSEIASL  
LRCLEAIAHERLLNLISPRQKRVL MVIQKTEDVVHGQMLRDAQLFTQKLLAAYAPKCLK  
PGVTL SIPEEVRKLISLLSRE\*

>SPBDM4\_v1\_50417|ID:27158780| protein of unknown function [Uncultured spirochete bdmA 4]

MIYWNADLAAKISCSRQEMETLPPYIDHLIEVSKAVGQSGIQPTADQFSSEKDAFFRYGL  
LLVSEGLAGEILEEILTVLLYVSDVKGIEFLRQCVA AEAILSANGEDQDMMLRLLPYC  
GIDKALTAMTKRKS DHAD\*

>SPBDM4\_v1\_50418|ID:27158781| putative GTP cyclohydrolase 1 type 2 [Uncultured spirochete bdmA 4]

MTITDFDKWAR SFLEIDQLRQIDDSLNGVQVAC SASKQIKKLAVAVDACAESIRRAHDAG  
ADILFVHHGMFWGKPEPVSGSLRGR LKMLLDFDMALYACHLPLDRHPEVGNNARIADV LG  
VTERKPF GVVYHGISIGWSGNL PKPSTLDEITAKILPDRSAPKSIIAAGPREVKTV AIVSG  
GAPFESLEALAAGIDL YITGEP SHSIYHYMLEGGMN FIAAGHYATETWGVKAVAEKAQAE  
LGLETLFVEVPTGL\*

>SPBDM4\_v1\_50419|ID:27158782| Lipoprotein signal peptidase (fragment) [Uncultured spirochete bdmA 4]

MKGMK VWFPLVAAA AIIIADQVV KIFIVTHVPEGRIFSRMFGDFIWIVHARNTGAAFS LG  
ASSAPLARFLFFIAFPVEVLGGLLVYYFRAQNLSTPLRWSIGLIMGGGTGNLIDRIFRPE  
GVVDFISVNM\*

>SPBDM4\_v1\_50420|ID:27158783| protein of unknown function [Uncultured spirochete bdmA 4]

MNKTPANKGKVELFVIGATVANILLMEICFVLLMLLYSAML SKILPAEALIWAIAVAFIL  
ALLMSTLIYRRLKLLRERYHLDEYLGLNKK\*

>SPBDM4\_v1\_50421|ID:27158784| conserved protein of unknown function [Uncultured spirochete bdmA 4]

MVAGRGRLE RIGVTVPEIYLP GAGTDYRKWAVVACDQYSSEREYWE EVDREVNGNPSTLR  
LIFPECYLGDSDKDTRIATI QKTMQDYLD EGILSPRGHGFM LVERTTPFE EKPRLLGLVVA  
VDLERYQY GKDSKSLIRPTEGTIVERLPPRMQIRRGAPLELPHIMILIDDP RKTVIEPLY  
QKRLYFERAYDFDLMKNSGHV RGVFIKEEA EFARISEAFENLADPEAFRAKYGVDEVLLF  
AVGDGNHSLATAKAIWEETKAAFAGHPDAETILASHPARYALVELVNL YDEGLPFHPHHR  
VLFNIEAQDFL GMLAGAGAEIQYTS DAAQAFIVDASATGAQTAGCTHRFAFVTENRAGT  
ITFEAPRAGLAVATIQEYIDIYRKDHPEAGIDYIHGTASTESLGRKKGNLGLYLPPVDKA  
SFFSVVIHDGAMPRKTF SMGEAPEKR FYVEARKIVRGQD\*

>SPBDM4\_v1\_50422|ID:27158785| D-isomer specific 2-hydroxyacid dehydrogenase NAD-binding protein  
[Uncultured spirochete bdmA 4]

MVILLADAFAPDLPGR LAEFGEATS DMSRLGDAEVLIVRSKTKVDKAMIDAAPKCRYIIR  
GGVGVDTIDVEYAKSKGISVDNTPEASSLAVAELAFALMIAMPNHLVRADVSMKEGKWLK

KELERTELHGKTLGLVIGRIGRELALRAKAFGMSVLA YDKYVTSSDVAKLVSLDEVFAK  
ADYISLHTPLTDETRGMINASSISKMKQGVFLINTCRGQVVVEQDLADALKSGKMSGYAT  
DVYNKEPPEGSPLL GAPNVLMTPHLGASTEENLLRLGDSIVARLRKYTGR\*

>SPBDM4\_v1\_50423|ID:27158786|serC| Phosphoserine aminotransferase [Uncultured spirochete bdmA 4]  
MKRVINFNAGPAAIPMEVLQKAQEEMLDWNGTGMSVMEVSHRSKEYEAMHNEAQDLFRKL  
AGMGPEWKILFLTGGASSQFFMIPMNYLFDGRKAAAYIVTGHWGKAAIKEAKHFGAFDVIT  
TENPDGTFTRIPKQEELRIDPAAA YVHMTSNNTIFGSQWHYWPEVGKVPLVCDMSSDIFS  
RPFADKFSLIYAGAQN LGPSGVTLLAIREDFYSLAQEQAKLPTMLS YRTHGENNSLYN  
TPPCFSIYILNLT LKWLNTVGGLDKMAKINEEKARILYEAIDKSEGFYRGPVEKDSRSQ  
MNVVYRLKTPEMEETFVKEAKAAGIVGVKGHRSTGGIRFSIYNANLVENVKKAADFMDDEF  
RREN\*

>SPBDM4\_v1\_50424|ID:27158787| conserved membrane protein of unknown function [Uncultured spirochete bdmA 4]

MRRELNAKIDQPESIEPPPPFHPQAASRWFKRRRITIAESYLMVVRDLDSRHSSARLDAL  
RKLAEVAFQSTNIDYPLNTARVQSALVKEVVKHRSNKRRLQLELLYDFSMSTRGQHQVIRK  
LCDELNIVELPEKGVQIGLSYGWDGHVHDTATSGRKNPTQLIIDAFIKGISSLTVA YGS  
VSDLEMMEEALEAGNILGLKVNIGLEFSVMVEGSR YHFMAELPHFSTREELRAFFGKYAI  
SLDSFFQGLDTNRENRLDA VRRLLDVFNQSTLLKINEGFEGKPEYCLAPLSLDDLLATIP  
NMNITPLHLAEFMYLQYRPVLQKR V WYFKVLREKTRRESQSDTDEKAEKIAIESKYSELR  
KELRELSTDMLLSEYFEDPHAISYQTVFEDLQSLSHLLHGAGCTIKFIHPLYGLEKATS  
VFGQFEELDSIEIYNTQDCINREPEEIDTFARVVNEHNRAALENKKFLQPVCGSDATG  
RNPKIPGMGFIFEDRITGRLRQR YIRRHVALTPLVSAMIRARDVVVDEASFQKTSVPRII  
SMGKISSGEGYTSTSNDEKISPVRAWRYFNPAFKNTIRALIGFFVATAFVGPY ALLWIG  
ITGFRNSIADLISYRGPRLNQWRLK SINFDNVAQSLFWTGFSPILGFVKANFDVWVPLA  
HGTFLFNFAKFFSIFANGFYLA AHNTLRGFDKNVVRANIFRSILAWPLATVFAPLGDTL  
SIPSIVQTKIWS DVIAGFIEGGNKYRKVLRQRQKILEEIIPTIIHTKGNTQYIAML DVLY  
LFSQEPRTKSIIKAVLSPYRLFTWRLRKNSSLRLNLLVDLHTTMC DERLWTDLVDYVVAT  
YDEEMADDLVDL VVDEL PDLQDWLGR LIEKYSKKSGLMSK LARSKKQE QPPTHQ\*

>SPBDM4\_v1\_50425|ID:27158788|mdh| Malate dehydrogenase [Uncultured spirochete bdmA 4]  
MDSEVTWWKFDEVEAFMKAGFEAVGVAPEVA AVCADVLISADKRGVDSHG VGRYKPIYLD  
RIWAGILNPKTIFDVVRETPTTA VIDGHNGMGHYIAKRAMEMAIEKAEKYGLGMTVCRNS  
THYGAAFY YARMAVEHGMIGLTTT NARPAIAPT WGV EPMIGTNPLTWGMPSDEDFPFMLD  
CATSTTQRGKIELYDRLGKELPDG WVIGQDGKYRHDTHQVLIDL TQDKAALTPVGG LGED  
LAGYKGYGYSMVVELLSSALSQANFMKALADIGPDGK KKSIELGHSFLAINISAFCDLDD  
FKHHVGEVSRQIRASKKAPGATRIWTPGEKEHDTWL YRKDKGV PFPNPLKKA FQEVKDRC  
KLDIELPF\*

>SPBDM4\_v1\_50426|ID:27158789|trxA| Thioredoxin [Uncultured spirochete bdmA 4]  
VTENLT KKT FLEKVFNYEKEKDWKYN GELPAIDFWAPWCGPCRMVGPVLEKIAEEYS GK  
LVVYKINTDEEQELAGAFGIQSIPSILFVPVSGQPQMAVGALPKSTIVDAIKDVLGVEAA  
\*

>SPBDM4\_v1\_50427|ID:27158790|hutU| Urocanate hydratase [Uncultured spirochete bdmA 4]  
MKTQPYTVSLGLDELPPDPVFEPGIRRAPRREAALSPAQERLALKNALRYIPSQWHERLA  
PEFLQELRERGRIGYRFRPQGRIRGLPIDRYSGRCIESRAFRVMIDNNLDFDVALYPYE  
LVTYGETGQVCQNW MQYRLICKYLEILDEDGTLV VESGHPLGIFASHPYAPRAIVTNGLM  
VGMFDNLKDFNIAAAMGVANYGQMTAGGW MYIGPQGIVHGTYNTILNAGRLRLGVPADGN  
LAGKLFVSSGLGGMSGAQ GKAAIIAGSASIVAEVDHSRIETRLSQGWVSCEANSLEEAVE  
LAVSARDKGEPIAVAYHGNIVDLLEYLDAKNVRVDLLSDQTSCHVPYDGGYCPAGITFDE  
RTRLLAEDRTYFRALVDASLRRHFVIMRLVRKGT YFFDYGNSFLKAVFDAGVKEISKNG  
VDEKDG FILPSYVEDILGPELFDYGYGPFRWVCLSGEKEDLRKTDQAAMDCIDPNRRGQD  
RDNYIWIRDAEKNKL VVG TQARILYQDAFGRMKIALRFNDM VRRGEIGPIMLGRDHQDTG  
GTDSPFRETSNIKDGSNVMADMATQCFAGNAARGMSLVALHNGGGV GIGKAINGGFLVL  
DGSEKVDNVIRMA LSWDVMGGVARRSWALNPHAMEVSEEFNREHA EYGTVTLPNVANEEL  
LDRVLGAR\*

>SPBDM4\_v1\_50428|ID:27158791| conserved protein of unknown function [Uncultured spirochete bdmA 4]

MTNDIRILQETR VGKGFIP LQYLGPGENEYRIRDEQLRSLGKEPGA FRPLSTHELEVLVR  
NNNTCS DWSLFLVKDPFCPELLRNNLFFGLIRISRLEHVTLEHHDISMETGIFNSQIIAC  
DIGDNCVISDCAYLSHYIIDHDCILINNAEIQVSNHSKFGNGIVMESEDESVRITLDVMN  
ENGGRWIYPFDGMLSGDAWLWAKFRDRTLMAQFARLTDTKFDRRLGRYGVIGRNSVLKH  
NRIKDSYIGESA YIKGSNKLKLNLTINSSADAPTQIGEGVELVNGILGYGCRVFGYCKAV  
RFVMCDNSALKYGARLIH SVLGENSTVSCCEILNLIFFAHEQHHTSFLIASLIKGQSN  
LAAGATIGSNHNSRAPDGEIEAGRGFWPGLCTSVKHSSRFASFCLLSKSDYKHELDIKFP  
FCLVDSDETQGKLILVPGWWWHSNTYALMRNEKKFEERDRRIDRSIQFIYSPFAPDTMSE  
IFEGLAILERATGDAAMEALVDDETNRSLLGDRVFELMDEIRASAEKSPERRSLSKRSPE  
VTRKLG VHLANAKDALPFEVRVSGFENSARPEVVIKPKSWNSYREILLWFAVQTL LPV  
FENLKRNAE EPVDLFEKAQALYQSENGAALELQWENLGGFLVRH SKLENLLAHIETGDIQ  
SWDDLHDEYRKLSS EYEQDVRAFAWGILGYLSLDPESASAINRGISHSDEAESARSWPDL  
TKDALVAQLADARRITSEITKRVYATRAKDWSNPFKRTMFRNEAEQIAVYGRIEDNDAIQ  
VVRREMESTQQAIDRVLAWLSVE\*

>SPBDM4\_v1\_50429|ID:27158792| protein of unknown function [Uncultured spirochete bdmA 4]  
MAMDFVDSARVDTLVTSEKKVFELFEMMVKSTGQERSRAVALANLLGNPGEFSFYIDC  
TEDQLRIRVFHLLRVFRENMTLLINKTWADGMENVTQEQLLGDLARFIEEYRDGRIVSAF  
RTFVGISRQIPSLFLGSLGKANDFLEYAFRIDPKFGLFFWYIGEIDLQLRNIDSIPEHRE  
LFELEVLIGAFVLSCF\*

>SPBDM4\_v1\_50430|ID:27158793|fusA| Elongation factor G 1 [Uncultured spirochete bdmA 4]  
MSLETIRNIGIMAHIDAGKTTTTERILFYSGKTYKIGEVDGGEATMDWMDQE QERGITI Q  
SAATTTYWRDHQINIIDTPGHVDFTAEVERSLRVLDGAIAVFCAVGGVEPQSETVWHQAE  
RYHVPRIAYINKMDRLGADFEAVLQDMRSKLG AHPVPLNIPIGAENSFEGVIDL VEMEEI  
RWHEDGSEMTRSPIAQERAEMAHRWENLLDAVSAQSDIITNL YLEGAPIPKETLRAEIR  
KACIARHFVPVFAGASRRNMGVQPLLD AIVDYLPAPDEVGAIKAFHTKKEEDVEIPCQIN  
GYPLGLVFKVQYDREAGSLCYVRMYSGLSHTASTVYNTSKKKRERITRLLRMHANKSEPI  
DSVSAGDIAVFVGLKLAQTGDTLGTEGYV LLEKMHFPEPVISVAIEPKT LSDRDKLKEA  
LEILAREDPTFAVNEDQETGQIIIRGMGELHLDVLRVLRREFKVQAKIGNPQV TYRESI  
STKFRHTEKFHKVIAGKENTAGLTIEVEPLPRGTGNQYRKALRAHDVPEEIFDAIERGIT  
SAFSSGIQYGYPAVDIGVSLVDIDYSELSTAF AFEACANMAYDAACRAANPV LLEPIMK  
VDILAPKEFVGEVMSLVSQRGGLIHGSETKNVSEVIHAQAPLATMFGFTTSLRSVSQGRA  
SFSMEFSHFEPKRG\*

>SPBDM4\_v1\_50431|ID:27158794| protein of unknown function [Uncultured spirochete bdmA 4]  
VGWPVFPYGMKGHFSCVVFYALFLYIFIAWFQGTSPFKGFQSLHLPRSNP\*

>SPBDM4\_v1\_50432|ID:27158795| Peptidase U32 [Uncultured spirochete bdmA 4]  
VKRIELLAPAGSSEALDAAVGEGADAVYLG LRSFNARMRTTNLAFNQFEAAVYACHERAR  
KVYVTVNTVFEEREADRLYQLLEYLVS VGPDG VIVQDAGVAKMVRDHFP SLSLHGSTQMN  
VASSAGCNQLSRSGFKRAVLARELSLEEIKQIRQYTSLELEVFVHGALCVSASGLCLFSS  
YLGGSANRGMCTQACRRLYESETGTGY YFSPDDLQIEYLPALIAAGVNAFKIEGRMKS  
AEYVGTVVSA YRYLIDNYETDQDRAILKSSAMLQADFARRKTSFFITGTPDDYIHPDQAG  
GTGIHLGRIRDARTIDDKRWALMNTY EGLAERDSVRIHRKDDSGRITAKIQAVKYGV DGM  
LLQIDGEWRQND DVYLIQTASMTRRYRPILPKNLDRFHKFPSSHTAPKPTL PRLDGRKLD  
TIFEPGTYVLAGKVADLHAALTFRPKKAMILFDKLN AETMRRDEGNLPFKRDRLILWLDP  
YFAESDAAWLQTELEYWIGKGVSLVVVNNQA HFTLLRGKNVTM VVG PWLYTFNPWALSYY  
LEQGVA AVIPPYEISRQDL YRLTGYVPAQFFAPIIFA YPDLFRIRADLSRVYGGQSHFS DR  
EGNLFTLVGRHDYSVVIPDKPFS LIDLVPNLKKQGF SRFILDLSNAEPARGLYRDIARAA  
DQCKPLSNTSRFNWKDGFWSEETVRREENMRNRDDNRREEAVRFGGGTRSMKNPRQP VAK  
SQVRGTKSPVRATKNAQGA KR SRKQ\*

>SPBDM4\_v1\_50433|ID:27158796| putative Acetate operon repressor [Uncultured spirochete bdmA 4]  
MSESAGKALDILFYLANV GEGVSLARLSKETGMNKATALRYLNVLESKGVVERCLSGWTL  
GLSLFELGSKVPVRQLVAEKVRPIIERLARESGESVNLA YLAGETA IYLDRAEANRSLRM  
RSM PGDRLPLYCTGVGKAILS QLSEERIRAILGPGPLPKITESTY TDPDEIICEAGRARE  
SGYGIDREEFEIGLTCYAMPLRLPGSDFVGAISISGPTARMKNPEIRDRFLALLAQA VQD  
ATDVLSPSHHFEDPPKKPEGCA\*

>SPBDM4\_v1\_50434|ID:27158797| Single-stranded DNA-binding protein (fragment) [Uncultured spirochete bdmA 4]  
 MNHLNSILVEGNLVRDPNFRSTPSGNQVCDFTLATNRSYKVADQKYENEVSFYFDIEAWAR  
 LGAACAQNLKKGRGVRVVGRLKQDRWTDPEGKAHARVKIVAEHIEFKPMNKANREDGSKS  
 DDAFVEASKPSEASAAVF\*

>SPBDM4\_v1\_50435|ID:27158798|purB| Adenylosuccinate lyase [Uncultured spirochete bdmA 4]  
 MNSFDQFQSPFSWRYGSEEMRKIWSERNKRRLWRRIWISLAKAESLYGLVNSGQIAELEA  
 HAEDIDFEKAQEFEKSRHDLMAELRTYASQCPSAGGILHLGATSMDIEDNADALRIRDS  
 LRLKKRLAGLLDVLAEKIERFAATPAMAFTHLQPAEPTTLGYRFAFYAQDLADTYERLS  
 ATIDAVKGGKFGAVGTSASYAELLGIAQLEDFERVLSEELGLPFFEVAQTQTYPRVQDYR  
 ILVLLAELAAILHKMAFDLFRILQMPLLGEISEPFGAHQVVGSSAMPFKRNPIECEKIDSLA  
 RLVASYPGVAWDDAALSGLERTLDDSANRRVILPEAFLAADELLATMRRIVEGQVIDEEA  
 VQCTVESYAPFAATERVLMALGKLGTDREAHRLRDHAMLAWSAVRGGKPNPLKTLLQS  
 DEFFASRLSSDAIEMLFVDVDTYIGAAEQRARATAARILRLALDEP\*

>SPBDM4\_v1\_50436|ID:27158799| putative tolQ-type transport protein [Uncultured spirochete bdmA 4]  
 MLDFISKGGPILWVIMALSVVALAIHIERLLYLRRISIDEEKLFLRIKTSLEMEGHYSEAL  
 AICDQNVSPFSTLLKVGIENRNQPEYLQRELLKDAAMESVNLERGMTTLGTISNISTLL  
 GLLGTVTGMTKAFVGLGKFGAVSDPAALASGVAEALITTVGGLVVAIPVIMFYNYFASRI  
 NLILTRLETQVNGLVNLVSSYSKENGKNEEKPSKEI\*

>SPBDM4\_v1\_50437|ID:27158800| conserved protein of unknown function [Uncultured spirochete bdmA 4]  
 MIRDRKLSPKINFDLTPOLIDIVLQVIFMITTTFKTSPIILQLPASQTAQSVATPELR  
 VVVVSSNEIYVDKTKTNLAGLEPILRKRVSQSDAKQIRAVLEGRSSAEYQLIISVLEALR  
 LNGIENVGLITRKDKVVQ\*

>SPBDM4\_v1\_50438|ID:27158801| conserved protein of unknown function [Uncultured spirochete bdmA 4]  
 MTEAHTYAEREQRKRTIISYAIALGLYALLFGAGFLFDLHPQNLDFSNTLIVNIQGPV  
 LNDVGKGGSPVEKKEEAVVAEKPPPPPPAPKQQTTPVAAQPAPVTPAPAPEPTPAPVVP  
 AVQEPVTPWTPGERGPGSRISSESSVLSPGEGQVPWGTGEAVRITKAKEGNTVETTLGG  
 SSETVGQSLYVPIYLNMPVPSVVPAGLFNAIPNEIIPSTLIASAESRKRAFLNYYTKSG  
 NEYRLTNAVPLEVREKLWGILEDAGYNAEQADYKTGRTLNPVVIGFSVTKDRQLRGVELL  
 QSSGSDIDASVLYGFKRASFWNKSGETIQGRFVYRF\*

>SPBDM4\_v1\_50439|ID:27158802| Response regulator containing a CheY-like receiver domain and an HD-GYP  
 domain [Uncultured spirochete bdmA 4]  
 MNTDQKRMVLVVEDNAPMQKVLSSLSIQKMDYDYAIAKNGREALDLIESGDVSPDAILLDI  
 RMPVMSGLVVLPKIRTIIPSVPVIMLTAFGDLETGLAAMKAGAFDYLKPSSEKIRETL  
 EKAFSYREIMEMKAEERKREQQRLELEKRVESYQELGDVYGLKMKMNLQTAVALAETI  
 EAKDRYTQGHRCERVRWLSSRIGKAMSLADEEIEQLEYAALLHDIGKIGIPDSILNKEGPL  
 NERERQIIRMHPHPIGAQILSTVEFFEKAASAVRHHHERWDGKGYPDGVEGERIDHLARI  
 SLADTLDAMATSRPYRRALSDFEVLQEIHLMRGIQFAPDVVDVFFAADLDKAYLEKFREE  
 VRKKKDKP\*

>SPBDM4\_v1\_50440|ID:27158803| membrane protein of unknown function [Uncultured spirochete bdmA 4]  
 MHDIWKIREYYSIVVCRMVSIISIFFGFVLLMLAEWRYVRFSQKNQGKKNKPEHHVPLPG  
 HTALQVPGYVLIVLGMCSALLHSEQNMKLPEYMRTVCLVLALTGGGFLVWTVFLEIPLGA  
 KKSQVPRGHAYARGSYGKCRHPGFWWFLIFTLGIALWKSDFYAFLLFFFENALNLLLILL  
 QDQYTFPIQFVDYREYAEKVPFLVPHFRKQHR\*

>SPBDM4\_v1\_50441|ID:27158804| Multi-sensor signal transduction histidine kinase [Uncultured spirochete bdmA 4]  
 MILDVSSLIPALSFCIYIPFIIFGLANKKERNVNSFLQYMGLMALWSFGSFMHANTGLF  
 TPLVWNRVMLVGMLGGPITIFATLIYFSKTEKHYRIFLYFGYIYIFSLYLNFSGLIVT  
 DAGFVDNAFYITLGSAGIAYSLSYFYLLAILLVLWELRTSKDKFLKRSRLVVAGVVI  
 MLLGIASNLYTPLGRYPIDLLAATINAVIIFSVYKYRIVHYSVVNLNIFLTLVVFSS  
 LIYMFFVFLVFKLERLIPFSELTMSVCLGIVSSLFLAPLRTATQALLERLYGGKSFLYY  
 QELRKFSADLTSIVSLEDLAKLTVDNVMSTFKLDWAFVLINDYNARHFRIIAAKGLDFAG  
 EGEQGPKEHVIVPRTDQFIQSYQMRITQQSQTSAQRSISIRLTKGEEHEMVAASLVLPLK  
 FKERLNGFIVLGPRIEKDYNNQYDLEILQFLTDQASVAVENAISFERLRQQKRLQETNE  
 ELALSRNKLEAFFDGIATPISIQDINYNIVTANYAAQRYFEKPEELVGSKCYKAYFNRD  
 RPCVECLAQDCLHTKLPFSSEKQDDRTQLTFSLNFYSIPTPQGSIGSFIEFFQDITKQKT

LQEELIQSEKLAGIGTLVSGIAHEINNPLGGILGTADLMLPETPEGSPLREYTSDIIRYA  
QSAADVIKDLMIYSRKTRTSAEMLSIVNILENSLKMAMRGIDFGTIVVRKSYDPVHEILA  
NPTELQQVFLNLIVNAVQAMNSDGILTLSCRQEDDDVA VTVQDTGMGIEKENLDKIFNPF  
FTTKETGAGTGLGLSIAHHIVTKYGGRIILDSQEGKGTTFVILPAADQDKDRVHLVHAR  
ELRQFEDSFYLQRKVLVGEKGYKEETIRRSDEVA YHILAYKGLQPIGTVTLHLSEEEGH  
VPIEENFSIARYLDGSLYAEIDRLAVSKEERGS LIPFSIMALAYLYARGRGAKRIFLDVF  
ADEMKLIKMYEKLGFEEIGSYSKPLPCTVMMMDHVSKYEQEVSRMEHFVKPFFSRLVPKI  
DFSGEDMHYVMKAIDEISAKFSKQSTEQGPLDEAI\*

>SPBDM4\_v1\_50442|ID:27158805| Diacylglycerol kinase [Uncultured spirochete bdmA 4]  
MKPDDLAEGLNTIFAHSPVFQDKSLIVDVIANPKAGGFSRIHHSKRFNKLKEIVKRSLS  
LPERTSPFSLKMHLTERCGHAAAIVQRILDRSPSNGKDSYHLIVTAGGDGTSLETAERLT  
RLPESEKNRFGIVRLPFGTGNDSGRNLLVALERFLGPAMFERRPALRVTPSEEGGSLP  
RYSFNIASIGLDA YVADMTNRLKHNFPGDSYKFWVDVGTFLFYDRVYNVVDMLKAWNEEK  
LMVDSNEPRLLIAMGASGNRQYGSNKNILPNEYNCVAVAQTS LFRKLLIKGPIEHGRHEK  
IPELMHFTADKLLIEYSERIPLQCDGETVILAKCDFLIERLHDVYNVLPVA\*

>SPBDM4\_v1\_50443|ID:27158806| putative 2'-5' RNA ligase [Uncultured spirochete bdmA 4]  
MRLFASLPFAHVQRQIADYSHSLVPAFGRAHPSWVPQENLHLTLHFFGELEAGTTAKLQ  
TLAESAPLCPPLQLATGKLSVLPSLRAPRVLYISIEIQPVEPLAELIGRMRDIAAQIGA  
ETDTRPWKAHLTLARLKIFWIPEFSSLAAPPKLTFFVDSFELMQSKLDRSGAVYSCFRRY  
PLAGK\*

>SPBDM4\_v1\_50444|ID:27158807| PP-loop domain protein [Uncultured spirochete bdmA 4]  
MKDARTTSLKLTALRHYEMIQPGDNILVAVSGGKDSSCLAWDLALKRQWWDVPFEITA  
CHVATDLADKGYAKPIDEAWLASRMTEWGIPYVRLDVPVAGRLKPGETMNCYWCATQRRT  
ELMKYAQAHGFKLALGHHMDDILETLFMNMMKKGEFATMPPVMPYKKYPLTVIRPLSLC  
EERQIIGCADELNLTSTFCSCSFNLEGERKKTRRLIDQITGDSSHIKRNIFASMSRVRPD  
YLA\*

>SPBDM4\_v1\_50445|ID:27158808|msrA| Peptide methionine sulfoxide reductase MsrA [Uncultured spirochete bdmA 4]

MNGHEINTEKALLAGGCFWCMEALFKRVPGVVQVKPGYCGGSVSNPTYEQVCQNTTGHAET  
TVEVTFDPSRISYQGILEYFWKFDPTTLNRQGADVGEQYRSVIFYMNESQREIAQQSKS  
SAQKAFDTPVVTSEIPVGRFWPAESWHQDYAHNPDPAPYCRFVITPKVAKFEA\*

>SPBDM4\_v1\_50446|ID:27158809|udk| Uridine kinase [Uncultured spirochete bdmA 4]  
MPPVKIIGISGGSGSGKTTIVRKISEMVSDVFVLPQDNYYKSAEFINNRNITAFNFDHPD  
AFDNELLIEHLGALKNGDSIDMPVYDFVHRRTERTIHIQPSKLVIFEGIMIFTNKQVRE  
LIDLKIFVDTPDDIRFIRRLTRDIKERGRTVDSVVEQYLTVVRPGHYEFIEPTKAYADII  
IPEGGFNERALDVLVSFINSVIYPLEGREKLSTGFDNMPGVDGPAGTTI\*

>SPBDM4\_v1\_50447|ID:27158810|ispH| 4-hydroxy-3-methylbut-2-enyl diphosphate reductase [Uncultured spirochete bdmA 4]

MQIIRARVLGMCMGVRRAEELAREAATKAFQEGSRVYTYGPLIHNPQAVADLES LGVHVL  
DAKAIETGTGELPDLKNAAVVIRAHGASLAALSRLHELGASIIDATCPRVIKSQRLARHY  
EKLGWQVVLVGDPHHGEIAGILGHTSNALVVDSPKMALQMAEKLKDHPALIAQTTRQE  
DYDAVIEVFQAHVKNMAAEKTICPATRERQRALIDLCGQVDAMLIVGGKNSENTKRLYAS  
AIECGVPAWHIETASELKTEMVKFARIGITAGASTPDFIVDEIQETLSNMV\*

>SPBDM4\_v1\_50448|ID:27158811|cpkA| Carbamate kinase [Uncultured spirochete bdmA 4]  
MAARKTIVVALGGNAIIEEGTEGTIEQQFENTRKSMAIVGMIAEGHKVVLTHGNGPQAG  
VHLIRNEAASNQVPPSPLNVIVADTQGS MG YMIAQSLSNALHAEGIEKDIVTVITQVEVD  
PDDPSMQNPSKYVGPFYKAEQVEKLRDRGWVikedPMRGYRRVVPSPPLDVVEKDIIKD  
LIDDGKIVIAVGGGGIPVKREAGGTLSGVDAVIDKDRASALLANLIDADELIILTGVKEV  
AINFRRPDQEVFDHLTVEECDKYMAEGQFPKGSMPKIEAACDFIRRGGSKVIITSMENA  
TAAVDGKAGTVITA\*

>SPBDM4\_v1\_50449|ID:27158812| conserved protein of unknown function [Uncultured spirochete bdmA 4]  
MNGIQNGLTLLQQTATNSTGSLVSTIVTFGLVFVIFYFLIIRPQNKKQKEMQQMIAGVK  
KGDRIVTIGGIHGVVASVKESTVVVKVDDGTRIEFSKSAISSVSPVKAEEKTEEKAKPAD  
EPEEKTEDQ\*

>SPBDM4\_v1\_50450|ID:27158813|secD| Protein translocase subunit SecD [Uncultured spirochete bdmA 4]  
MSKFRLLIVIAVLA VAFMFLFPSIQWYFLTPKEDQAI AVGSREQUIREYSRRMTYLIITD  
LKQKAVAKDATDL S GQKAYKVVVESAKKAYS LAKKPAPKSWDAI AILSGFPGERSMFDSI  
ESRYREHVL S LKNVHSNA VQLGLDLAGGMSA VIQADL KGLSEKLGHDLSQA EKEDAMKRA  
VEILNSRV D KFGLTEP VIRRQGEDQIYIEIPGTPDPERINSIIMGKGNLAFYIVDSEAST  
VVNSYLSTNPV GIDEQTMIVDKPGLVPEGEIVRKVYKKDSYGLDEFTGEY MVLQGKPGLD  
GSHIQSATVSTDSITGKPETNFVLDKEGGDTFYALTSDNVGKTMAVVLD DRIKSYARIQE  
PIRESVRITGFD AEAESLALLMRTAALPISLSVVSQQAIGASLGEDSIGQGR TAILVGL  
LSIFIFMFAYYK WAGLNATIAQGLNLYLMLS VLTAFKLT LTLPSIAGFVLT TGMADV ANV  
IIFERIKEELRAGKTRAA AIEAGFHKA FWA VMDSNITTIIAALFMAQLGTGPIQGFAVSL  
AIGNM TSLFTSLFVSRL LDFETDVLKATHMSISWRVR\*

>SPBDM4\_v1\_50451|ID:27158814|secF| Protein-export membrane protein SecF [Uncultured spirochete bdmA 4]  
MKRLIRFSKFFLPAMI S STIIVLGLIGYFTKGFNLGVDFQAGINETIQLAFPA GQVTFA  
GRGNAELTVSENQLTLV FSGAEA QKRTVTL DYKTYPTIADIKAALEKEQGI AVTLADGSD  
TLPSTSLVPTYQGN SLLSTNPVKLYRAPVND SERYASIDVVREALKSLGQVSVQ T INPAS  
LQRYLVRVRDDGTD P QFTTTVTQTIRQLIEDKVGKDRVIVVKTDYV GPRYSQTLGRQSVW  
LVLV TLLVILLYSTIRFKIEYAIGAVLAIMHDALIMVAFIVWTRMEFN TTTIAAILTILG  
YSINDTIVQFDRVREERKMHP SDAFVDV LNRGLT LTLGRSITTLT TMLAVLALFLFTTG  
SIKDFALALLVGMTSGVYSTIFIASAFVLLWENR KSKQKPKAVKETKGKVVAPAKS\*

>SPBDM4\_v1\_50452|ID:27158815| conserved exported protein of unknown function [Uncultured spirochete bdmA 4]  
MKKFFLVVLA VLFVA VPAFAATSISTTLQATV GASLSITTTIPGTKALDPTL TSATLGNV  
TITSNVTNWTITIHSANGGKMIRSGSADIYPYLLNFGSETGINL TSDHVITKTAPQTAQT  
TSVSVTYDTAATLGISAGTYEDTLTISLVAL\*

>SPBDM4\_v1\_50453|ID:27158816| protein of unknown function [Uncultured spirochete bdmA 4]  
MTKEKIAKAQSASEKTIGGTLPLLLSEPRIMFIIQPNHHITNKNPIAMGTKVNIELFS\*

>SPBDM4\_v1\_50454|ID:27158817| exported protein of unknown function [Uncultured spirochete bdmA 4]  
MNIIRGSESKRGRV PPIVFLALCALAIFSFVMLRDSAYRSESALLKAASEKIALRVSAK  
LQAMLDTGEQFRQLLRTEGGRTYAALRPLAEDSLARSSYIDSITIAPGAIVRYSFPEDRA  
SASIGHDLLN NPERMQALVEAVREKKA VLQGPSVSAEGEDLAFLRIPVMDKADLWGFVSI  
GFDIDRMLADL DISSEFPGLFVAIASSGTDGRGRQVFWGDQRALQGYEVA VTAGSEDFPW  
TVYTASSYPVVRV VWWGAGLLALSIVSLVLFMQGMVAGRQRKRTLSAPSLKEASFV VTP  
FVQKAEENEGPLPEVAAQDQAAPASTALASSEEGARAAVRTPVSVLVVDDSEVNRELLFR  
MLTLKG YEAQSVSSSEMALDAIKERSFDVLLIDCIMPKTDGYALASAIRNIIGEAPSLMI  
AMSPRHDPQETEK CRAAGFDSVLIKPFMTSLDQKIQETLYHKGDKVP GG\*

>SPBDM4\_v1\_50455|ID:27158818| conserved exported protein of unknown function [Uncultured spirochete bdmA 4]  
MKKFALVALFAVA AFGMAFAANPSGTVQFTGAVAESFSLTVPQAFTNGTISNDSETTWSL  
GDVKVISNVKNWTIALSSAHSGNLVLSSDNNETIAYTVKLEGLLSDVSLSGA QTSQAQAR  
TAKAGNAYALS VKIPASSNFYQAGTYSDTITVTIHP\*

>SPBDM4\_v1\_50456|ID:27158819| Rhomboid family protein [Uncultured spirochete bdmA 4]  
MYSNSVLR RPFRYRFFNATLYLIAANVIIFALGYVWPMLTYILALNPRAVMAGWVWQVFT  
YMFAHANLTHLLVNMLGLFFFRPVERTLGSYEFLLYLLSGLFAGIASFAIYAFSGAWN  
TMLLGASGAIFALLLAF AVL YPKAMVYLYGIIPIRAPVMVIGYTAIEIVSSFLGAASSVA  
HLTHLAGFEAGEAYFPVRLGVNPFKRLREK\*

>SPBDM4\_v1\_50457|ID:27158820| Phospholipid/glycerol acyltransferase [Uncultured spirochete bdmA 4]  
METIKSRYPFITELIAHVPREAQVSELNVYQEGIASILPYIDTIIHDYLD DDCSTIEGLE  
NLGALHDDAQKGESALILMEHYSNFDLPVFHYLLRKLGAAGDAAGESIASNIVAIA GIKL  
NEENPAVYAFARAYTRIVIYPSRSMQIIREKFNDPKELYQEIKRSISINHAAMKALSAK  
TSGKMILVFPAGTRYRPWDPSSKRGVREIASYIKSFSKFCLVSVNGNLRNLP SGGMEED  
ILQKDRVIYKVSPVHDSKEFLASVKYDLHFGDDKKQAI VDTVMDLLDAMHKETENRCRD\*

>SPBDM4\_v1\_50458|ID:27158821| conserved protein of unknown function [Uncultured spirochete bdmA 4]  
MATVVSASRRSDIPSFHAEWFYGR LRAGCVDVANPYNNAQVRRVSLRPEDVACFVFWTRD  
ASPMLK GIDALEGYEFYFHV TITGYGPPLEPSGLPAKEAIEKLQALAAKVGASRLVWRYD  
PVLLAGRYDAAWHAENFSRLADGIGGSVRHCVISLYDAYRHS D SRLRKAGILADSASGRM  
VNWADSQGSVVDMMQTLAEIARARGLPVSFCAEPELEHRIASENLACIDARIIRELTNRP

FSVRKDKNQSRSGCNCIESVDIGSYGICPRGCLYCYANRRQNVLI\*

>SPBDM4\_v1\_50459|ID:27158822| HAD-superfamily hydrolase, subfamily IIB [Uncultured spirochete bdmA 4]  
MNVPGISPISALSREEAHTIRYVLMDDTLTTDGKLRSESYAALWKLHESGLVVVPITG  
RPAGWCDLIAREWPVEGVVGENGAFVFWEGDGHRLATLTHPNAIPNSDPRLVALRDRALA  
KVPAARLSRDQFSRLYDVAIDFAEEEPVLPLSIAQQIKAIFEGGGAHAKISSIHVNAWMG  
EYDKVSMAIHYLTKRFGYDDLHDADSVMFVGDSPNDEPMFAHFPMACGVANLLEYRELFA  
HLPHFVTSRESGAGFSEFAQVLLERRSS\*

>SPBDM4\_v1\_50460|ID:27158823| exported protein of unknown function [Uncultured spirochete bdmA 4]  
MRIKKNIIIHAALLLILGGISGRVQAQLLGSLEPVLHFQTESFDIYAPPNMEPEAERLA  
GFADKTYAMLCEFFGVKASARRIPVLLSDIEYSLNGYTTLYPSNRIVLLLASADPRSOLA  
TMQDELYSVFLHEL VHYVTLNERAGGWALAWLSGDWIAPEVWMMMPQALVEGTAVWVESR  
LGEEGIGSPGRLNDPAALETVRLERARGQSRSLWDVSGLVDFYAGNLPYLYGGLFADFL  
SERYGPDMLGRLWRASSDGNIFRFGDGLTSRGILERETRVPPRQLWQDFLAWVDDGSS  
VEGGGGAIWTGGAQELFSGYVGVAGAGEGVLYFVDLERRGLYALPVKAMAEGESAQENGI  
EKSEGEKEKKNVRPERLFAVDGMLRNIFNVKSEALELDWIRIDAQNQEIPARYRYDLKN  
RTLTYEYDLPVAAPGSALQALHDESEQNIFLYDSWQDSETSIRYGLARIGTAVLPARQLP  
EGRIEVANIPNNAMRWLSPGSRDQSESPDSVRFALSTIPDKGLSRLAVLEEKKGSWQLSI  
ARDAPQGGVHQPIFIDASHIVYRESKENGQAALCLLDISEKRQGA AVSDRFSAPIPIDWI  
LPSEWLALYAPEIHTALPGPSDQGHQPQKSRSTLFPALFSTSRIPYANGSLIGLDIIASDL  
TERLAWVVFAGWDFSTARPAASTELQLGAGAWQFNVSASDQSVLTPVARKSTLGTTVTW  
HRTLLPSFRSISANSHAAFAGVQNNYSASGILNVVPDYAWATGIGLDFSSAYASRKSPY  
GTLGFSLSGNVEYESASTAGFGGMSLSGSASLKGFRDASLYGAVAPAGGVAFAPAARYLE  
SGGSYVLSAADIPYPVYQEYRSFLNPSPWYVFGEAQYRLFSLETGWHLRPFMPAFALRR  
IVGNIGLRGAGLDVSGAPVILSSAFAQADDFDALLAGLAAETHHTFTVEAAWAFQPGKAG  
GRPTHSVGLQTSLE\*

>SPBDM4\_v1\_50461|ID:27158824| NADH-dependent butanol dehydrogenase a [Uncultured spirochete bdmA 4]  
MQNFEWVTPTKVIFGSKILEKLGKETAGIGKRALFLYGKESIKKSGLYVMVVAQLKGEV  
FFVEHGGVQPNPRISHAEEGARKIKENHLDVIVA VGGGSVIDEAKAIAVAGCHEEPLWDF  
YMRKISFEKALPIVA VQTLPATSSSELNGASVMTNETTHEKFSIRSETIYPKVSFLDPSLT  
LDIPVQYTAYACTDILSHLMEGYFTASSDFPLQDGMVEGVCRAVMGALEIVLTDPRNLEA  
RSTIMWAAALAWNGILKSGVEGASIPNHVLEHPLSGFYDVPHGAGLSIVIPAWLKYMKPS  
IAHRIVLYGERVMGLGKKLEGKTPPEGADIVIKELLENWYRHIHTPVRLKEAGIISLDIDA  
CTKQAMALSVLWGVPGYDAEDIRAIYALMN\*

>SPBDM4\_v1\_50462|ID:27158825| Iron-containing alcohol dehydrogenase family protein [Uncultured spirochete bdmA 4]  
MDSFSYYMPARLIFGPGKLAELATTSYFPWGKALLVIGSGGAMRRSGTLARVQSLLASRG  
VAVLVYDKIKPNPEMEQVEEAARIARKADCDDVVGLGGGSTIDSAKSIAMLAKNPGRYWD  
YIMSGTGGRKIPVNGALPIVAITTTAGTGTESDPWTVQTNPQTREKIGWGTDCITYPTLSI  
VDPELMISLPPKQTA YTGMDAFFHSAEAYLATCHQPASDLLALDAVSRLTKWLPVAVADG  
SNIEARTSVAWANTEAGICESLSSCISHHSLEHALSAFYPAVAHGCGLTMLSVAYFGDVA  
ERNPERFADLARAMGEDVDALADAERPF AFIKALEKLI AAAGLAGEKFSDYGVKKSDIPA  
MAQNALTAMGGLFACTPVKQEADVERIFERAYR\*

>SPBDM4\_v1\_50463|ID:27158826| putative DinB family protein [Uncultured spirochete bdmA 4]  
MVEVFQYYSKCNKVINAEMMGVIGGAKEDVFDAPVDGYFKSIKELLDHIYGADV RALLSF  
RTVREY AIFKDPFFKTPDPKAMVSADFASFRENREHL DALLVQLTDEIAEADLSKYVTR  
TTRQGEKQQKLFWKTLMHTFNHQTHHRGAVSQILDQFKVENDYSGMIRID\*

>SPBDM4\_v1\_50464|ID:27158827| exported protein of unknown function [Uncultured spirochete bdmA 4]  
MRELKKARRAIVGIVLAALFIVAPCGLAFADEIKAAEYALSCLNISPANASELNFAWLT  
PKLGKTIVQMAKATDKTSAEFPADKAVSFGSQAIVTATTFNTDDVTAPTGLFSNKVTVN  
GLANSTEYVYRVGDGSNWSDTYAVSTRDPKAFGFLVVGDPQLGSKATGPKTLEADTAGWT  
SLLNKATALYDSSFMLS LGDQVNDYSDRAKQDAEYLTYFSPKQLRSLPVATVDGNH DFA  
MGEYYGYHYNLPNLSSQYGVSYGNDGDYWFRYGNALFLMLNSNTESVYTHDLFIRDAVAK  
NPGTTWRIACFHAIYSEADHVNDPDIIDRRASYVPVLERYKIDIVLMGHDHAYTRTFQM  
LGGKPQKTQVQDTS GTVINPTGILYLT FNSSGSGSKFYDWNSSAPEAYSAARWQGVPSF

GHHISGGVFTFTEYRADDMSVIDSYSMIKTE\*

>SPBDM4\_v1\_50465|ID:27158828| protein of unknown function [Uncultured spirochete bdmA 4]  
MINIDTAEGFIRKNGTEIERARLSSILGSMFDTQKALSLIQSLQNKDGGFSLVKDRESNI  
SDTGFILTWLSDLKALHSNIAEKAIVYLESQNKNGSWNETLPTDDTETPEWQKPENHRA  
MLFHTANTLFWLNKYSRNSICIEKGRFLNENYKSEQEYIHTKWLFASIMSEKHSWRSSI  
IREIVKEIYEEITPEMPSSILTWMLCAFSVYEIPRDMMEYIPAMMRQIHQEGDGSIESEDD  
DSYKVNATLEAVKVYKYIIE\*

>SPBDM4\_v1\_50466|ID:27158829| conserved protein of unknown function [Uncultured spirochete bdmA 4]  
MWIVDATEEYLEWFREQEPDVQSAVLAKVLLLETFGPQLGRPHADTLKGSTIKNLKELRA  
RTSVHVLRLVLYYFDEHRQALLIGGDKKKGNEKEFYKSLIQAETLIERYRQ\*

>SPBDM4\_v1\_50467|ID:27158830| conserved protein of unknown function [Uncultured spirochete bdmA 4]  
MATVKNVAVKAMEGMMTEEQIRRARSTAECEILAIRLAELRERRGVTAQAEVTAFSQTAVSK  
LEKRKDMKVSTLVEYLEGIGMGLELRVYPKGSKGKTQGEILLKV\*

>SPBDM4\_v1\_50468|ID:27158831| Transcriptional regulator, XRE family [Uncultured spirochete bdmA 4]  
MSNLSKYIEARKKVDPAFAVGYDAGYEEFKIGVLIKELRLKEGMTQEELAKRLHTKKSVI  
SRMENSIEDIRLSTLGKVAEVFGKRIQIAIEDLAH\*

>SPBDM4\_v1\_50469|ID:27158832| protein of unknown function [Uncultured spirochete bdmA 4]  
LPFHTEKLTYYLLTCVKLLAFKESMAKYIHFYNSERFHQSLGYETPAARVRSPLGIQECNM  
EEVIRFKTLDKWAHLRPF\*

>SPBDM4\_v1\_50470|ID:27158833| exported protein of unknown function [Uncultured spirochete bdmA 4]  
MKKWSMALVLLFCGMCLFAQSLFDVVTGTPEQVQAAIKAGARIDDRDNWFSDTPLMWWA  
FLNENPDVIMALLNAGADGTIKSSEGKTAFDYAQQNQKLEGTKAYWDLNNAF\*

>SPBDM4\_v1\_50471|ID:27158834| putative Cro/CI family transcriptional regulator [Uncultured spirochete bdmA 4]  
MQIVEKTRHIRVNLTGEGAEKVAALVKERFPEAMLIDDDDEVVEWESSLVREIKAKKTP  
GKLVRAYRERAGMTLVELAKAVGTKYPNLSAIEHDRRAVGLGMARKLGKVLGVDIRKFI  
E

>SPBDM4\_v1\_50472|ID:27158835| protein of unknown function [Uncultured spirochete bdmA 4]  
MMVPDSNPSPDDLIQKLEEAIEHPVISFSIFSDTKMPSNWHIYNAEPLETYMADPQRYTI  
VLYIPKKYEGYLCSTSIIVFDRTKDKYIAFACCYDEG\*

>SPBDM4\_v1\_50473|ID:27158836| protein of unknown function [Uncultured spirochete bdmA 4]  
MTKSERRIKRLEQQAQDDAPAPPEAIRLIEAMMGEKMSEEAKRRPQKRGGPLDPELKA  
MIDKIIA\*

>SPBDM4\_v1\_50474|ID:27158837| protein of unknown function [Uncultured spirochete bdmA 4]  
MQGDSSIVAEEKLPRIRRYATLGAIRREVLRCYEELLAKPNADPVEIQRSRALGYLLSTA  
GELLKSEKLDEIEKRLDALEAKRDDKETRQ\*

>SPBDM4\_v1\_50475|ID:27158838| conserved protein of unknown function [Uncultured spirochete bdmA 4]  
MTDASLVDDIIMHFQAGTTETAAGLLRQLSDIDYEQHRTPLAEAAGVRPAALDKLRRQAE  
KKESGEKMQGRALTPDITPADEPQDGATLLDDLARHVRRFVVIDETGIAAITLWTVFSH  
LAHDAPCCPNLVFSSAVKACGKSTALDVVSRLVPKPLATANVSPAALFRTVEMLSPTLLV  
DEADSMFRNNDLRTL VNAGFTRTAATVVRIVGDDLEPRLFSVFCPKAIALIGTLPDTIE  
SRSIVIRMRRRLPDEPIERLRSKDKQGFAPLARRIARWVSDNKHLLAEPELPELSDR  
QADAWRELLRIADIAGGEWPTRARNAALELCSKLEDEDADISTRLLSDIEKIFNDDRERTK  
WPSQTLVDALNAMEESPWAEFARGKGLTTNRLAKMLARFDIRTRTLRAGTGTPKGYTVES  
FAEVFSRYLPQNRNTATFDDNTLQNNDLKCCGNVSVADAKRNISDETGGQGEQAQDEFPLF  
E

>SPBDM4\_v1\_50476|ID:27158839| protein of unknown function [Uncultured spirochete bdmA 4]  
MSALTANADALMAVLKPELERLCRNAPPFGEITLKASIHGDVGRVSLGIEEARKIAPRS  
GREGGRL\*

>SPBDM4\_v1\_50477|ID:27158840| protein of unknown function [Uncultured spirochete bdmA 4]  
MENGEKRFLSRQEAADVLGISLVSLARRLRDRSIPYVKLGNRTLIPSAYLDELVEKALSG  
QGAK\*

>SPBDM4\_v1\_50478|ID:27158841| protein of unknown function [Uncultured spirochete bdmA 4]  
LEEDSQGWETNVYTWQRGDTGRKKSSSKSLAGTGFAYTGRGRLGTDLVN\*

>SPBDM4\_v1\_50479|ID:27158842| Toxin of toxin-antitoxin (TA) system [Uncultured spirochete bdmA 4]



MWEVVYTKQADKDSKIAACGLKERVQNLIEILKEDPFKNPPSYKKLLGDFNGAYSRRIN  
IQHRLVYQVFEKEHIVRVLRMWTHYE\*

>SPBDM4\_v1\_50480|ID:27158843| Antitoxin YefM [Uncultured spirochete bdmA 4]  
MAVLTAASNARANLYRLIDQTNESHEPVVISGKRNAVLI AEEDWDSIQETLYLTSVPGMR  
ESIINGMKEPLAESIKELSW\*

>SPBDM4\_v1\_50481|ID:27158844| Site-specific recombinase, phage integrase family [Uncultured spirochete bdmA 4]  
MARNPVSISKRPTLKKGELRYVRFWNENTGKYSNARSVLSIVQELGLNEKEYPPTSRTG  
ALLIGQELLKRGGALSKKNDPLFADY CASMWDWDTSPYIQGRIARGLRIGRHALHSKRF  
IENYVHSAFPALKLCALRPYMLETFILGLKKNRSLRNRNSINSIIDA IKTPLKEAVRLGII  
AVDPSASLQKLGDDRKIKGIPTTEKELSGLLSLNLDPRIRCAILLGAACGLRLGEVQALKL  
ENIEGNTLRVAHSWSRFEGCKSTKTGKERVVPLPEIIRTELLKLADMNPHGRDGFMYGL  
LPDVPFDCRAIARGFMNALAHLTLGEKYSTATRAEKTAALQPWKERNITFHSRLRHFANAE  
LRGAVPDETLRKL TGHSTEAMTDHYDHTTEADLEALAKAQEARIVPFIRTA\*

>SPBDM4\_v1\_50482|ID:27158845| putative RNA methyltransferase YpsC [Uncultured spirochete bdmA 4]  
MHTSRVANVMRAIAVCAIGLEKVLARDLAHLGFRDVGSRAGRVFFNVGADSLAEDLTKAN  
IGLRTADRVLVVGFEKAFDFDFGYQGVASVPWERYCSKETKVLIERARANRCKLHAQAT  
LQSMQKAIYTELMQQFRVRKMPETGNTLEVRIYGDNDWWQIVIDTSGEALSRRGYRRFT  
HAAPLKETIAASMLFLSGWSRARPLVDPFCGSGTIPVEAALYACNMAPGLKRHFAPFELFP  
EMDGNKIEDTRVFFRQQMRKDIRTDIQASDIDGQALELARNNAKLAGISEFVRFSSVDAR  
ELVPSGNGRVLLGNPPYQQLASQEEAHALYRELSPLERFLNADWECGFLSADKEFAST  
VGFEPASVREIVSGQETIYFNWFSGKGRKNETDSGSGDA\*

>SPBDM4\_v1\_50483|ID:27158846|zwf| Glucose-6-phosphate 1-dehydrogenase [Uncultured spirochete bdmA 4]  
MNIADDSPYCRLDTRFSPEPALFFVFGASGDLASRKIFPALYDLYLEKQLPVGLLMIGA  
ARREYSTEQFREIMRTSCMAHSRHKA EALHDEAWHDFSQRIFYLRNDVEDTGSYATIRKL  
VVERDRSVLAGLPGAELPENTLYYLA VTPEFFPVIAENLGRSGCGSDASSQGWRLVVE  
KPYGKDQQSAARL TESLHRWFEERDIYRIDHYLGKEAVQNLLHFRFANTIFEPVWNRNYI  
DRIEITVVEQEGIGTRGGYYDGFGAARDMLQNHLTQLLCLTVM EPPASLSPEHIRDEKVK  
VLRAIPEYSKEQILARARRGQY MAGTDAQGRAVPDYRAEHKVRPDSATETYASL TSVEN  
WRFSDVPITLRTGKALAEKYSEIVLYFKRPPSALFAALCGDRLATNSLTVRIQPDEGIWL  
SFNAKVPGEPAIRSNLSRFSYREVTDYFPEAYERLILDALSGDSTLFI RADESELAWKVI  
DRLEAAWASVESGSNPEEGLLRYSAGTSLKALRHQIEESPRLEGIS\*

>SPBDM4\_v1\_50484|ID:27158847| putative 6-phosphogluconolactonase [Uncultured spirochete bdmA 4]  
MILQIYTSNDEWLRAALDLILSTQDGGERRRSLHLCLSGGTTPKPVYESLARSETFKAIA  
ASKAVHLWVGDEREAPVHSGLRN SEMIAGIFVAAGFKNF AFREPKN SALKIQIPAPPIIK  
NLDSAAPGLILHAWPTGP RENAAAAYDRELAVFAGETIRADRPFDDL TILGMGEDGHTAG  
LFSMEDVRRGAGRLVILTEAPQEPKKRMTMAPHVLLSSGKILVLLRGLPKARLLMANLFG  
ERADPIKYFLDRCEVVAQI\*

>SPBDM4\_v1\_50485|ID:27158848| protein of unknown function [Uncultured spirochete bdmA 4]  
MRYRNILLYMELFLALHGTISAQIRERIKFSGFDWYVRKTTEPEGPMNNLFGGLGTSVDT  
LPDGALRLSVVYRNGTWYSAEVWTT RSLG\*

>SPBDM4\_v1\_50486|ID:27158849| protein of unknown function [Uncultured spirochete bdmA 4]  
MILGLFTYRRTLWYHNREIDIEFSAWGT DTERLNGQYVVQPHDKAGHLYAFPAAAFAGPS  
TQQFTWLSDRIEFSSWSGYGEKPPPGD PRLINSWVFSDAKSIPRPSAPIHMNLYLFESPP  
SDKKEGSLVVILDGF EFAPAKK\*

>SPBDM4\_v1\_50487|ID:27158850| conserved protein of unknown function [Uncultured spirochete bdmA 4]  
MLKEEFIQKSPVRIFEKSIEGGLHAGNIGVLASKK GIGKTSVLVQIALDKLMQGEKVIHV  
SFNAHTSYVISWYENIFNEIARRKNLENID DVKEQLVRNRMIMNFTQEGVTVDQITRTIN  
ALIVDGGFNAKTIIVDGFDFTRAPAERFEKVK TFLAEMQLEAWYTCTLAETEPVLD TQGI  
PIVLSIEPLISVIVVLEPKKDFIHLRVVKDHERRNPSDMNLM LDPRTLLIAET\*

>SPBDM4\_v1\_50488|ID:27158851|fusA| Elongation factor G 2 [Uncultured spirochete bdmA 4]  
MTFDIHKMRNIGISAHIDSGKTTLSERILFYCRKIHA IHEVRGKDGAGATMDSMDLERER  
GITIQSAATNVQWKDYFVNLIDTPGHVDFTIEVERSLRVLDGAILVLC SVAGVQSQSITV  
DRQLKRYHVPRLAFINKCDRTGANPFKVK TQLAEKLG LNP AFVTIPIGLEDKFEGVIDLI  
DMRAVYFDGPNGEELRLAEIPAHLQKDADRYREELLEASMF SDELA EAYLEGEVTKDLV

LEAIRKGTIEEKFPVPIFVGSAYKNKGVQLLLDGVVNFPLPDPSEERRNIALDLDNNETETEL  
VADDQAKTVALAFKLEDGQYGQLTYYVRIYQGMIRKGDDELYNTRARKRFKVGRLVRMHASS  
MEDIQEGNCGDIVALFGIECASGDTFCNPDLNYAMTSMFVPEPVISLAINPKDTKSSDQM  
SKALNRFTKEDPTFRTYVDPESNQTIQGMGELHLEVYIERMRREYKCEVTTGMPQVAYR  
ETITQRADFNTHKKQTGGSGQYGRIAGYIEPLKDETYEFVDMIKGGAIPNEFIPSCDKG  
FRAAMEKGTLLIGFPVTNVRCLINDGQSHPVDSDDIAFQFAAIGAFREAYEKAKPTILEPI  
MKVVVETPNEFQGNVFASLNQRRGVIMANTEDGTFSRVEAEVPLSEMFGYSTVLRSLTQG  
KAEFSMEFEKYAKVPTSISEQLRKDYLEKRKKDQK\*

>SPBDM4\_v1\_50489|ID:27158852| OsmC family protein [Uncultured spirochete bdmA 4]  
MTKEIQMNWLEDMAFQTDLDGHRLVVDADDSVGGKNRGPRPKGLLLVSLAGCTAMDVISI  
LKKMREPVGWFNLKVSGNLTEHPKKFTDFKVIYQFKKSDGLNPQNVQKAVELSQNKYCG  
VSATLRDAHDVAWEIEYI\*

>SPBDM4\_v1\_50490|ID:27158853| Major facilitator superfamily MFS\_1 [Uncultured spirochete bdmA 4]  
MEQWRKSFSTLMIAEFLAIAGFSTSNPIPLYLRLDGLVTDTAALNAWTGAINGLAAFVMA  
LAAPIWGALADNYGRKLMMLRAMGGGAILMGLMAITTSWQVLVLKGIQGAITGTVAAT  
VLTASLVPTNQIGYYMGLLQMAVFAGNSAGPLIGGVVTDIAGARVNFLVTSALLAIAAIM  
VHRRVVEIDIPKPKQRSVIRNAIPDFSVLKGPSVLKQIFIVIFFVQMGNAITGPIPLVV  
LALQKRDFVAGSISGILIGVTSVAAALGSVVTGKVSQRFGYGRALLVCVTGAFLFYIPQG  
IVMNVWQLLVLRFISGFFIGGTMPANALIALHVTKEKQGSVYGLSSAVSNMGGSFQVPL  
GAAAATLAGYQSVFFLSALMFFGVSIGVWRLVRKPKELVGHNV\*

>SPBDM4\_v1\_50491|ID:27158854| membrane protein of unknown function [Uncultured spirochete bdmA 4]  
MRGILRSIAKTLLVLVLTGALSSVFAQTSNKTSATIQLAVYVPPILTLNVNFASGGVTQ  
ITGHIGNTPGTYNNGFELRPNSIFTLGAARIVSNLTSSYSIVIQSMNSGTLKNQDSGSEI  
AYDLLIGGIPAARYGDAFRVSSIKTPRDGIEFPVSIALGNIPPNASSGLYADNLLFNIM  
AN\*

>SPBDM4\_v1\_50492|ID:27158855| Peptidyl-prolyl cis-trans isomerase [Uncultured spirochete bdmA 4]  
MNHRIILFALLPLFSIHFISCNAQVSRPDGMYATIKTNKGDIVISLEFEKAPMTVGNFV  
GLAEGTLDVTKGKPFYNGLTFHRVVADFVIQGGDPAGDGTGGPGYRFPDEIVPDLKHDGA  
GIVSMANAGPNTNGSQFFITLGAAPWLNKGKHSVFGKVEIGMDAVKQIQQGDRIESITQR  
YGAKAKAFDSSQKAWDQRLSAAYATLNALSQRKRDADMALIAQKWPDIKPPDKGIFQKVI  
RKGFGAVPNPGSKVSVIYKGMLLDGTVFDQSALSGGPFSFTIGKGEVIDGWDIVVSTMQK  
GEKRLVILPELAYGSQSIGDVIPPNSFLVFEIELVSIQ\*

>SPBDM4\_v1\_50493|ID:27158856| CMP/dCMP deaminase, zinc-binding protein [Uncultured spirochete bdmA 4]  
MPEYRRPTWDEYFMEVANAIKRAATCDRGRSGCVIAKDNQILATGYVGPAGLPHCDDVG  
HQMRKMLHEDGTITEHCVRTVHAEQNAICQAAKRGVAINGATLYCRMTPCRTCTMLIINC  
GIVRVVSEYRYHDADESESMFKMAGIQLEYVHNEVLKYNRQ\*

>SPBDM4\_v1\_50494|ID:27158857| conserved protein of unknown function [Uncultured spirochete bdmA 4]  
VAITIVFLGEIVGKTGVFTIKSTMPEIRRRFNPDFVCANADSATGGAGLGVQHAVYLRKL  
GIDCITMGEASYYPDMTEFYKAGWVLRPANLPEGDPGRGWKVFQKDDKKAIVVALLGQ  
SGFARVHADNPFLAVDQLSHFLHRDTSCHIVDFHAATTAEKLSLARHADGKVSAILGTGG  
KVLTAARILQKKTAAITDLGRTGSILSVGGDLPEVKVREFLTGVPAWSRDARAQPEAQQ  
VCVRFDEGLALSIESFHIGGKEIPDEGSSDSKRD\*

>SPBDM4\_v1\_50495|ID:27158858| putative Positive regulator of sigma E, RseC/MucC [Uncultured spirochete bdmA 4]  
MKEVATVKEIKGDMVTVAIQMQEGCGVCGNNGACKIRRSNLLVYNKSRIDVKEGEEVVIE  
VPGIEQAKSAFWVLGLPLIMLVGYGFGALVFHAATEGPSVASAGIGFVALLVGMLVQR  
RNRLESFPYILAKEGEGVY\*

>SPBDM4\_v1\_50496|ID:27158859| DL-methionine transporter subunit ; ATP-binding component of ABC superfamily (fragment) [Uncultured spirochete bdmA 4]  
MFHAERPEEAADQALIAQPSYNAPSRGDLFAPSRAAFQAISVPTQAPPNVMRVDGSKA  
FGSHVVLSNVSLGVPKGSIHGIIGKSGAGKTTLIRIAGLLEKPDGSGSVRYEGIETPVHLL  
RGRALLEARRKTGFVQSFNLFASRTAGENIAFPLEAAGWPHAKAHARVAELLALVGLSD  
KADSPSMHLSGGEKQRIAIARALANHPSILFSDEATSALDPETTRSILELIRSLREMLGL  
TVIMVTHQMEVRRICDTVSVIEGGKIVEQGLVADVFTNPRSDAAKAFKEDRND\*

>SPBDM4\_v1\_50497|ID:27158860|metI| DL-methionine transporter subunit ; membrane component protein of ABC superfamily [Uncultured spirochete bdmA 4]

MTDALNLLIQPLGQTLMLVSTLIATIFGGALGILLFALSNDRFAGKHKGARFAKHVAD  
RAINVLRSFPYIILMVLVPLSRLIVGTSLGTRAAIVPLSIAAIPFLARIVESSLSEVDA  
GVIDAAISCAASKRRIVFAILPEALPSLVSGLTLMISLLGYSAMAGVIGGGGLGDLAI  
RYGYQRFRGDVMAVAVITIILVELIQFAGTALANRIRATR\*

>SPBDM4\_v1\_50498|ID:27158861|plpC| Outer membrane lipoprotein 3 [Uncultured spirochete bdmA 4]

MKNSMIHGASKTTSPKRAPRAAFREGLVFFLVAMVAGGVFAQTGGKLVTLKVGATPIPH  
GDLLQLIKPDLEAQGIKLEIVELTDYVTPNILLADKQLDANFFQHLPYLNDFCADRKLQL  
ESAGQVVFVAPLGLYSRKYKKLEDIPAGSVITLNPDPNTNEARALILLENKGLIKLNPKAGL  
KATIRDIVENPKRITFREIEAPQLPRTLDDAAAIIINGTWAMQTGFVPSRDSLVEGAES  
PYANIVAVRKGDANDPRVVALVKALQTQKVKDYLLNKYNGSFVPAF\*

>SPBDM4\_v1\_50499|ID:27158862| conserved protein of unknown function [Uncultured spirochete bdmA 4]

MEKPGDFKESSRAEDADSAPTVAEEGPESPPAEGASNHFDEAFIGAARDYRMLLDKEYP  
VDASLKLVGDRYRLSHNGRMMLYRGIILSRSASQIDLAKLVRNPWEGATLGIDGYNILFTL  
TNYMHGHPMFIATDGLRDVGGAHGRIADHRGFERMAGLTVDILATLNLQITFFLDAPV  
SSSGRQAGFIREAFARRGINAEVRELENGVDHFLAYWEGELIATADSAIIARTKAHVFDLA  
RYILERQFSARFPQLAFFLE\*

>SPBDM4\_v1\_50500|ID:27158863| Alpha amylase catalytic region (fragment) [Uncultured spirochete bdmA 4]

MIPETDAIYQIYPRNFTKEGTLRAAIPQLGRIEAMGFDWVYLTPIHPIGKAARKGSLGSP  
YAIYDYRAINHELGSEADFAAFIDAAHAHRLKVMIDVVYNHTSPDSVLAREHPDWFLQGP  
DGRPGRKCGDWSVDVDFDYQASPHLVVELIDTLMSWRDRGVDFRCDVASLVPADFWKQA  
RVRVNQYDPGARKERAPLVWLAESVHPAFLRRMRQDGHGAWSEPELHAAAFDLTYDYDGW  
ERLEVKIGV\*

>SPBDM4\_v1\_50501|ID:27158864| protein of unknown function [Uncultured spirochete bdmA 4]

VQETLYPKDAKRLRYLENHDQERAAHRLAADGPLRAWTALYQFLPGVSMTYMGQERALDH  
RPDLFERDPIEPERGDMEFERYFRESLRAAKEAKQRAPFFSWSVAEDGTVYCLRSTEAAL  
NPHVDQTLKKGNVLLVAQPEGEATRGNATASAAPFSFGGTDLLSGEKVRVSGGATPAY  
APAMLIRLGD\*

>SPBDM4\_v1\_50502|ID:27158865|nagD| Ribonucleotide monophosphatase NagD [Uncultured spirochete bdmA 4]

MKATEKTLKHIRKKQAFIIDMDGVYHGNVLLPGAAQFVDWLKREGKRFLFLTNSSERSP  
EELSQKMARLGIEVAPEHFYSSALATAAFLASQKPNGSSYVIGEPGLIHALYRVGYTMNN  
VNPDYVVVGEASSYNLDTLIKAVRLVMGGAKLIGTNPDLTGPGEGGLVPACGALVAPIEL  
ATGRKAYFVGKPNPLMMRHALRTLGTREETVIIGDRMDTDIAGIESQIETVLVLTGVT  
AESDLPRFAYAPSHVLEGVFEIPDKEPKKIA\*

>SPBDM4\_v1\_50503|ID:27158866|ppk| Polyphosphate kinase [Uncultured spirochete bdmA 4]

MNKLPTMNRELSWLDYNARVLAEGLKPSTPLENLGFMRIASNLDEFFMVRVA AVKAAA  
QIGQTNEEWAGMDPQTLLKAINQKVQAHYDMLYKHLHATVLPGLAGHGIQLISEKAWTSR  
EWRYLERFFMENVYPLLTPRLRLEPRMELRREQDYFPSTGSLQVHVAFRLEEDGSIAVVQV  
PKNLDRFIVLPQRLSIEPEPATSQPQENVLRLALLEDVILAFGSKLFAGLKVLHGIIKVV  
NRDADFSVDEDRDDDFLTAMEEVLAGRQNSTPVRMVYSGEDQILLGALMQSLSLEPLDVY  
HVEWLIDLGRAMELCDPEFYRVHGITPDPSSLFFPLWKPARTFDEKGSIFDWIDEHDFVN  
LPYESFDVVQRFVEESASDPSVLGIKITLYRTSGMNSPIVHALAKAARSGKQVVVVLELK  
ARFDEEKNISWAAELEQAGAIVTFGVARLKVHAKAALVIRRRQDGSIAARYLHLSTGNYNE  
KTARSYVDFSLFTANPSLCTDIALFFNILTGYSSIQSLSLIAVSPFDLKERIIALIDREA  
AQSSLESFGCIIAKLNSLSDPDIIGALYRASAKGVQIKLNVRGVCTLVAGLPGVSETIEV  
RSVLGRNLEHGRMLYFRNGGSEELYLSSADWLNRMKKRIELLPVLDSEIKARCKDILS  
AYFSDNTHSYKLEQNGDWTNLSLTRPEEPAICVQEKLKMARKAVRNEEDRQEILQVRR  
SKGKFFEPGTIS\*

>SPBDM4\_v1\_50504|ID:27158867| Ppx/GppA phosphatase [Uncultured spirochete bdmA 4]

MSDAQPQKSPQSKESIPSSSSSIQGLHAAIEIGSTGIRLIVAEIDSKGGLKIIDRASKQS  
RLGRDVFTMGSISRDLRETIAILSSFSELLQGYGLQPSDIQVIGTSALREASNRTDFID  
RINLQTGFHVRIVEDIEENHMLMYLA VQKTLEDERSFLTRSNAMILEVGGGTTEVMLLKKG  
QMVSSHSLSIGTLRMDEQIRESARQPRQFIEMYLESNIKTACDVLAEDLPLDSVRTFVLI

GSDARFAAYCLSGKNFSHYAVLDRAQFIEFADSVAGLSPEECMAQYHLSWNETESYAAGL  
TIERMFLEKTGADIIIVPNVSIREGILLAQVQGMQKIEQELRRQVVASARSLAKFRFYD  
EAHAAHVKNLSLEIFDALKKEHGLGKHERMLLEVAAILHDIGTYLRTSGHHRHSEYIIAN  
SEIFGLNREDINIVSNVARYHRKTPPLSTHVNYIALPREARIIVLKLAAILRVADALDRS  
HSGRVRDLSFERTEDRFIIRPSQSLDFSLEKLSLAEKGMDFEDVFGLLPVLVLM\*

>SPBDM4\_v1\_50505|ID:27158868| putative lipoprotein [Uncultured spirochete bdmA 4]  
MDSTTGRKKGAAAKLFLVAGLIVILFVLLSGCARREGWGMVLWSVKGTAVKGGAVVPIY  
LKSNISKSYVIGLPDDNKTKIEVPPSLEFFSSKSAEETRAREFAPYAALYLSAGRDLGLP  
IREKPSVNARRVYRLRLGESVKVLSVADGEAVFTGGKALPGEWYFVQAIDGTRGYVFSNT  
MVLVEEKEGTAAPVIASSPAPSASLLDIIYAKPWRPAYYQIMVDDSTIDPDLFILRYGLF  
ADAKNSQVRIELPGYSGAFSFTSVSQSGDWLVFEKSKLRIRFENESTIVADWSGTDQVLA  
DEGWSQGGQAARFVQLDASIPVLLAGENSRRSELKAFFQRSSQLQSNGESTISFLSDTA  
GILSVDLKGTFEWSHTDQLPAGFAPEIPAEARDNVIKGEIRFGLHLGTAISSAWMGGFSL  
LVGDNPDRQDFVYRFENGQLVIKADSVTLRGTTESLDTRFSSVNYLVLVVK\*

>SPBDM4\_v1\_50506|ID:27158869| ABC transporter related protein [Uncultured spirochete bdmA 4]  
MSFIQLGGISLSFGARDLIRNATLNLQDGSRAALAGPNGAGKSTLMKIAAGIVKQDSGEV  
ITTKGARVVYLPQTGIRFEEGRVHDIAEQAFSYYLGLLDEQEKIGRALESEHLSEKETAR  
LLEQHHEIGETLEDANYWRREERIAEVLRLGLDFKTGDFERPASELSGGWQMRLALAKVLL  
EDPDIMLLDEPTNYLDLEARTWLENFLRDYRGAVLVVSHDRYFLDVTVREYELFNGLTLT  
RYAGTYSQYEVRRSQELAALFEAWERQQEEIQRIEERFRYKESKAPQVQSRIKMLEK  
ITPIEPEGMKRIHFAPPPAPRSGQIAVRIRDLTKAYGSMQVIGRFSLEVERGQKLAFVG  
PNGAGKSTLMRIIAGAESSFEGEMTLGANMLIGYFSQESAELMESGSTVEEEAESVCPFE  
MLPKLRNLLGAFVFRDDIEKPIVLSGGERSRLALLKLLKPSNLLVLDEPTNHLDLTS  
KDILLEALRKYEGTVIFVSHDRQFLDELADRVLVLELSCGLPPRLYHGNYAYYLEKKVQESS  
AETQPEHPDPNKNRESGAPATAAVQNSDQPSVTRDWGQEKARKAQVRRLKRREEEISARI  
EAIAVGKARLQEELAHPTYINGEKTRRILADLETLDQEAELNQEWELEIAESLAGEVT\*

>SPBDM4\_v1\_50507|ID:27158870| conserved exported protein of unknown function [Uncultured spirochete bdmA 4]  
MRRSLIRVVALLMFIFVSVLFFSCASSPAPVQDASAQKIIQLAQERYDAYDLNGASYYY  
QVLLDRYGSDPNYMLNAKYEMAFIEYKKGHKDQAVAAFKEIVARYDAPDASSLSPTWKVL  
SEKMIAELTGTK\*

>SPBDM4\_v1\_50508|ID:27158871| conserved membrane protein of unknown function [Uncultured spirochete bdmA 4]

MIATVINAAIILGSLIGLLIRKGIKDEYRKVVFTAAGMTSLTIGIQMALKTTHILAFAL  
ALMIGGLVGTMLDIEGGIERLGERLKFASKSEGAFAGFLNGSILFCTGAMAILGSFK  
AGTEGDYSLIFTKTVDGFVSIIFASAMGIGVAFSALS VFVYQGALTLLSVYIKPYVSDL  
MLAELTAIGGALIIMIALGLLEIKNFKTGNFLPSILVIVVLVLPFSL\*

>SPBDM4\_v1\_50509|ID:27158872| Elongation domain-containing protein [Uncultured spirochete bdmA 4]  
MRQDHREAHEQRFVHTRREDEAGEWYALDNAASIMPAVANGIMTSLFRFEAELDGPIDLE  
AIKGALDLTVQRMPYFNVTLRRGLFWYFEPGSLPPVYPDPSPCQQWDIHRHGTRMFR  
VRCEQNRIAAEFHAMTDGTGGLSFFRTLLANYFLLKGVDPPEARLKEGEWSGILASESTV  
QEEFEDAYQRYFPEGLPFPERGLKAFHLHASKALPRGQYRVICGTLSTAEVLAEKRRNVS  
LTELMVAVYLDALQQIWHETKPHRAPLVAVEVPINLRLVFPSTRFRNFSLFILISEDNR  
LGMRGFEELVRRTHHQMKEYDRMSIEKHLNRNAGSARRLVVRIVPLWIKDVFARIFFAR  
FGESMLSGFISNLGPVKMPGPFVPHIHTFGFIPAPSLTTMTNASMVSWGDKLVIDFGSLA  
QSRDLERLFFRRLRNGLHVSVCRLDHAKEGTHVILP\*

>SPBDM4\_v1\_50510|ID:27158873| conserved membrane protein of unknown function [Uncultured spirochete bdmA 4]

MSYCPDCGAEIGDAPQCPLCGARNPRAGTGPDSEKSCAEPTESEKFSDLRFMLKDAEEEF  
GAEKRTIEWEVLVAFVAILVLGAVNLFESRQFSWSLYPIVSILLVWVEATSFLVLRKM  
PVFRVLLSVLAPPVFLMVLGFISKSPRWALGLAVPIAVLVESLTGAVSLVIGKSRQKGLN  
LIACVLVAIVALCIGLEVFIDLFSRGAVVLEWAPVCAIALPIAFLLYLHYRVIKITNL  
RRLFHL\*

>SPBDM4\_v1\_50511|ID:27158874| conserved protein of unknown function [Uncultured spirochete bdmA 4]  
MNAIERAGYTEPTPIQAQAIGPILEGKDLLGLAQTGTGKTAALFALPILQHLLSGERCTAR

ALILSPTRELAEQTRKAFETLGKETGLFALSIIYGGVSVSAQLRSLKRDMPEIIVACPGRL  
LDLMGQHAISLKDIEILVLDEADQMDFMGFLPSIRKIIGSLPEKHQTLMFSAATLPTEIRG  
LAREFQKEPVRIEISNSQPVETVNHIVYPMQADKYAVLSVILKDSATGQALIFARTKHR  
AQKLATRLSEEGHLAASLHGNLSQAQRDKAMQKFRSGKVRIMVATDIAARGLDIRGISHV  
INFDMPTPEAYTHRIGRTGRMMHSGIALTLTPEDRSMKIIERLVGKPIERKIVSLGD  
KEILNSMDDRATMQEPAASNGMRDQRSTMHNRTHEKTSHRPPATHATNSFAHRAKPDS  
TRRSVHGSPQKSVRHTSGRHPKEYASIP\*

>SPBDM4\_v1\_50512|ID:27158875| protein of unknown function [Uncultured spirochete bdmA 4]  
VVCERLTPEEWNDSIKNPDKWIQGMPDEEPEGYILRLKNVRLP\*

>SPBDM4\_v1\_50513|ID:27158876| putative heat shock protein [Uncultured spirochete bdmA 4]  
METSITRSGNKMIVPPAQIREDESEVIAQLEMPGVTK EGLDIKIDGHTLTIDGKRSDIP  
SGKYLIRERRHYDYHKAFTIDESIDREGVSADLTDGILTLRLKVKETAKPRKIPVK\*

>SPBDM4\_v1\_50514|ID:27158877| putative heat shock protein [Uncultured spirochete bdmA 4]  
MDHANLVTRKRQAPTTLDLWDAFDDLRRREFERTFGDLEFPSVSGLLDWPAGPDIDLVEGD  
DEILVLADLPGVRKGDLELSIQGNLLTIKGEKKREEPTQSHKVVRTETWVGSFSRTINLP  
DSVNPEKVEAELRDGVLRIAKREEAKRRRAVQISVK\*

>SPBDM4\_v1\_50515|ID:27158878| Cpn60 chaperonin GroEL, large subunit of GroESL (fragment) [Uncultured  
spirochete bdmA 4]

VVEYQIEYVEGMQFDRGYTSPYFVTNRDSMTTFENPLILIHDKKISNMKDLLP LLEKIA  
QTGKPLMIIAEDIEGEALATLIVNHLRGTLNVC AVKAPGFDPKAVTRSALQNAASVAALL  
LTTECAITDLPEKEKPAAPNPGMNY\*

>SPBDM4\_v1\_50516|ID:27158880| Prevent host death protein (modular protein) [Uncultured spirochete bdmA 4]  
MTVITKHYRVVRRIEIRLTTSLSLSTSGSVLTRKLLTRCGLSPRSRSMGFTALCDSLTR  
LVVHALVRWRSSALCLTFQSICGIIYAL EDKMAINLKEDIKPISYIKTNAADMMKYVTEV  
KNPIVITQNGEAKAVLLDIESYQNIQNAFSLKILQLSEKQIEKGHYKSSEQVFDEIETR  
LSLKQ\*

>SPBDM4\_v1\_50517|ID:27158879| protein of unknown function [Uncultured spirochete bdmA 4]  
VRLSHNAVNPILRERGLKPHLVKSFLVSTDPDVRDKLKDVVSRISILRTTR\*

>SPBDM4\_v1\_50518|ID:27158881| Plasmid stabilization system protein [Uncultured spirochete bdmA 4]  
MKQYEVIVSHLAESDINEIINYFIPINKEYVIKLYQTFKDRITELHTLPNKGRIVPELEK  
KGIHDFRELIEGNYRIVYSIHATSVHILATVDSRRNLDEILVNKIIDFFNEE\*

>SPBDM4\_v1\_50519|ID:27158882| exported protein of unknown function [Uncultured spirochete bdmA 4]  
MRRRAIVLLVFLSLIAPAFQAQSGSAVVGSGSVVVGARPGDPQESIYVRKVGHGPRITIVLV  
PGNNTSGAIFEGILQYFRSVEDLNNA YTVYAFDYRGS GFSSYNKEITGLKDFALDFEKVM  
DKLEGFPKTGVALVGYSMGFGVALEMYIANPGRYSSLISLAGIGTRGVRISIANASQAGS  
DALGQQWAVGDWITVNTDKGIAGTAFQQSSWQGEARNLAGIQFVWDLV FEDALKYDIS  
SYKVGDVGPKAQPGYMGALLDGLSVQYMPESLYYCHKFNVSASDLTHKNGDGTVV TIPGD  
NRLGRLLAGKKVLLVKASTDFQNWRGDQVIYDNYTATTKYDLK KAGADVTAI LIDPNQGF  
DHGFVPLHPLETVHLIDSFLKGNL KASTVSA AIGGTAKFYDSAETT WETNNFTGF\*

>SPBDM4\_v1\_50520|ID:27158883| protein of unknown function [Uncultured spirochete bdmA 4]  
VTPIAIVTAILEAMTSVCSVGLDMIAVPGDTPASTLSAIIADEMAIGVVNKKTTASESAR  
FPERPSEIRWSSAAF\*

>SPBDM4\_v1\_50521|ID:27158884| Oligopeptide/dipeptide ABC transporter, ATP-binding protein [Uncultured  
spirochete bdmA 4]

VTNKPILDIHNLVVYETPSGPIVAIRDLALELNANEALGIIGESGCGKSTLSYAILDYL  
PSNARRSGSIMFNGEDLLLKTEKEMQNYRGDRIAMVYQNPYSALNPSLTIGEQLDEVTRI  
HRGFSRTQARKESIQLDLSLGEAEGIVRRYPHQVSGGIQQRICIAMALLCQPDIMILD  
EPTTALDVTTEASILDIIIGELKERHRMSLIYISHDIGIVNKISDRIAVMYRGEIVELGPQ  
EELFNHPKHPYTRALINCMPRAGVKKETRLNTIPGYVTRRSADERGCPFASRCEKKNV  
CEEKYGLREIESGHAAACDRAYATDVPDKSTFAPLIPKANARPGADQTDNASSGIEPGIG  
PAPLLELHEVYKYYKNRKRTVRALDGINAKIEKHDVLGLVGESGCGKSTMGHLVAGLLEP  
TKGNIHFDGKDISLTWKHRSRDTIRDIQLVFQNPGRSLNPSFSVEQILDRPIKMLKIRS  
RRERRAVMINLLKKVDLGE EYLSRPSTRLSGG EKQRIAVARAFVTS PRLIVCDEPTSALD  
VSVQASVLNLLGELQEQSHTSYLFISHDLNVVNYISDHILVMYLG RVCEYGLRDEVVNP

YHPYTEALLSAAPDVNPSHKQKPIRLEGAPPDPSAQIVGCPFAGRCHKKIDGLCDTTPPP  
LKRLSETHYIFCHLSEDRLRGVAHL\*

>SPBDM4\_v1\_50522|ID:27158885| ABC-type dipeptide/oligopeptide/nickel transport system, permease component  
[Uncultured spirochete bdmA 4]

MQRWYMAKRYPLIFPALIILFWFFIATFGPSLMPFSYAMDMDHQMTAPGVGEHLMGT  
DSLGRDIWSRIVYGSRSILTIALLTSLFSSLAGVILGFTAGYFGGRIDALFLRVMDIMMA  
IPPLVLSMVVLGVLGNSNILTLTLIVSIAYPATARVARGTLLSCKNIEYVDAARLRGES  
HLYIMFREILPNTMGPIIVEITARFAYSIMMVASLGLVGLQPPTPDWGMVVIENKTII  
KAAPWAVLYPSLAIASLVIAVSVFSDFLSKVVIRDQ\*

>SPBDM4\_v1\_50523|ID:27158886| ABC-type dipeptide/oligopeptide/nickel transport system, permease component  
[Uncultured spirochete bdmA 4]

MTFFRPFRRLLGGMAITLIAMSILIFLLVELMPGDAAQRVLGQSATPQAVAALRESMGLN  
DPVWVRYGRWATGMLRGDLGTSLYMRGVPIASIFWRKVGNSLVLALLALLFYVPLSIVFG  
ILAGVKAGKIIDSISFFGLATMALPEFVSGIILMTIFAVKLAWFPITSVIPIGESIWSN  
LNILVLPALSITLVMFGYVSRMQRASMISVMNSDYIRSAILKGLPMRKVIFKHALKNALL  
PTITIIGMNMGWLFGLIVVETLFGFPLGSLTMSAVKTQDTPLIEVCVLFITAVFVST  
AITDLLYGFLNPRIRYPGGS\*

>SPBDM4\_v1\_50524|ID:27158887| ABC-type dipeptide transport system, periplasmic component [Uncultured  
spirochete bdmA 4]

MKKKLYFFLAVGIVFLLAFSGCSGKDKQASQNKAIRIAEQVNLITPGVWDGQAFSLDSS  
IYEYLV DIDTEGNLVPALATSWETPDGKVWTIKLRREGVKFHDGSDFDSDQDKFTIMRTQD  
PTVGHKKAQDFSVVDSVETPKHTVVINLKEVRPTFIYQMTDYNMAILSSSYDYAKSGET  
KPMGTGPFKLEKLIQKESAKLVRNKNYWDKDYPLADELLIYFVPDIDSSVEMLEAGKVDI  
VPQVTPLIKQRLEKADGFKVSPYQEQRFSLMASDRTPFNDNRVRLALKYAMDPEILAKA  
CQGTNTDVFYNETPIMNSLAQYHMLPSRGRDIEKAKSLLAQAGYPNGLSVELYYASDHP  
YSPALAQTVKELAEPAFNIQLKGYPRDVYLSQYWMNAPLSITGWGGRIDPSVLLNLAFT  
SQGPWNESHINDQEVDQIITKILKEVDDSTRQTLYDRLQEVFYERGTLINVQVPYLVAMK  
DTVEDYRQPITMLPQLKYAHLKDVK\*

>SPBDM4\_v1\_50525|ID:27158888| Transcriptional regulator, MarR family [Uncultured spirochete bdmA 4]

MDVNVSEEVLSTLRKISHAVELYSRILFREYGLTSPQLTILTAIFRSGPLAVTDIARRVS  
LSQATVTNILGRLEQQGFILRARSTQDRRMVYIELTDKTRKILEKNPSPLHTDFLSRFDR  
LQDWEKTLLSSLQRIAKLMDVEQLEEPDIEHMQGKALKE\*

>SPBDM4\_v1\_50526|ID:27158889| exported protein of unknown function [Uncultured spirochete bdmA 4]

MKLVKVVIGGVLVALLFSCGAPKLAQTDLDAANAAFADAQNAKADAYAPDAFKAAQDAKA  
ALDAELAAQDAKTSGKSYKQANDLIKAFADASNKAKEAAATNMDQVKGEVAQLITDIDTQ  
YANVQALAAASKDAKKA AKAKLNVKDIEAKVAAAGQAITDAKAANDSQDYAGARDQLNA  
VKSTLDELKSTLEAAGFTAQ\*

>SPBDM4\_v1\_50527|ID:27158890| putative Lipoate--protein ligase [Uncultured spirochete bdmA 4]

MQIVAQSYKVVADSPLDIISFEELVSSWTGNKIILLFYVNPPSVIIGRNQNYWREVSPS  
CKVPVYRRSSGGGAVYHDTGNLNWALIVPRAIHSQNDELTFIAKAISELGVYARPGDRGG  
IFVSMGDGETKKGKISGTARRFGTRNVLHHGTLLVSADIQALKASLGGIQMFEDVSIASVP  
ARPVNLTRFVPSLSVDEVMSQISGVLSDVELKTIDLEGSWDEHSSRDDSFLKNPEDLGEG  
PDFCIEREDFDAFKCQFGSREWIIDRSPPFVLVSSDMSRAVVRIEQGKIAEIQPLEAED  
ERSAVYAKHLHTRFSGTQFDFKVPEILEKEHVWTNMRY\*

>SPBDM4\_v1\_50528|ID:27158891| conserved protein of unknown function [Uncultured spirochete bdmA 4]

MDKYAVLNEVRSLIDEVKFGVLATVDADGYPHQRWMSPVLLPRFPGSLFCVTSEKFGKIA  
QLEKNPQVSWIFQSMGLDRVATVQGRVEIVRDPMLAAEVQEAIGPRLRVFWKYAEDPSKL  
VVLETTIEEYQFFAPLKSINEYVKAKAVSYES\*

>SPBDM4\_v1\_50529|ID:27158892|pdhA| Pyruvate dehydrogenase E1 component subunit alpha [Uncultured spirochete  
bdmA 4]

MKAFAHYKKEELMRMLTIMQTIRTFEKAGMMYGLRKIGGFCHLYTGQEA VAAGAISL  
DLSKDYVVTA YRDHGHAIACGMDPKKAMAELFGKVTGCSHGKGGSMHLFDVEHHFFGGNG  
IVGAQIPVAAGVAFAQQYQGS DGVTL CFFGDGAFHQGAVHETFNLGKIWDLPIVFIENN  
QWGMGTNWKKVSAVDDFSVTAGAYGMKGGSSCNGLDVL DVRTIEKAVAEARLGRPSLVEA

RTYRYKGHSMSPQKYRTREEIDEYRKRDAIQSFRSRLSEEKILSEEWSALTQRINTQI  
EEAVAFAEESPEPSLSELYTDIYA\*

>SPBDM4\_v1\_50530|ID:27158893|pdhB| Pyruvate dehydrogenase E1 component subunit beta [Uncultured spirochete bdmA 4]

MAEMTYREALNRALDEEMARDDRFLIGEEVGEYDGA YKVS RGLLSKYGPKRVRDTPISE  
LGFTGLGVGAAIAGLRPVVEWMTHNFALLALDQVNNAAKLRQMSGGQLSVPIVFRGPNG  
PAEFLAAQHSQALGSYWMHVPGLKVVAPATPADAYGLLKS AIRNDNPVVMLEALMYAWK  
GEVSEQEFLVPIGKARIAREGVDVTLITYSKPIRVVEEAADRLAEKGVQAEVIDLRSLRP  
LDEETIVNSVRKTGRCVVVDEAWPLASPGATIAHLVDSRCFDVLDAPVELVSGEDVPMPY  
NHTLELAAQPSVEKVIAAVAKVLYREDV\*

>SPBDM4\_v1\_50531|ID:27158894| Pyruvate/2-oxoglutarate dehydrogenase complex, dihydrolipoamide acyltransferase component [Uncultured spirochete bdmA 4]

MAEVLRMIALSPTMSEGRIAKWKMNEGTEFSSGDVLCVETDKASMDYEAPTSASLLKII  
LQAGGTAKVGDPIAVIGQKGEDYASLLKERASEAGVAEKKAPGQQPSKEVSQKEKAVPGK  
TEQEPGSTPESAPQSDTENAPPRAPKASPASVGAAPRQTPQAPASVPPSSPLARKLALAK  
GIDIRLVPGSGPNRGRVVERDILEFAERPKNVTVPEVAPQELRQGPVVIQPNMKRLVIARR  
LSEFFTAPHYFLKKKINAEALLELRATANAGRPAKLSFNAFLMKIVAEALVRHPEINVY  
WRVPAASAADAAASPEPPTAMRPILEQRHSIDVGLAVALPDGLITPVVRDCNLKSASDI  
DAELAQLIEKARGGRLAPEEYEGAGFTVTNLGSGIDEFTAIINPPGSAILAVGAIVKEP  
IVGDNDVIRVAQTLTLTLGCDHRSIDGAVGAVFLADLARMLNPGMALV\*

>SPBDM4\_v1\_50532|ID:27158895|lpd| Dihydrolipoyl dehydrogenase [Uncultured spirochete bdmA 4]

MESKQYDFVIGAGPGGYVAAIRAAQLGLTTAVVEKNLVGGVCLNIGCIPSKSLIHNARL  
FAEGKKLLETGAKVDLSGFDYAQVWKASRLAADRLSKGVSYLLKKNKVELVQ GKATLSG  
AGTVDVETEGGARQLKAKAILLATGSRPRPIPGFEFDEKKILSSTGMLMSEKLPGRFIL  
GAGAIGMEFAYVMNAFGVEVTVAELLPRVLPLEDEEASKIVEKEFRARGIAIHTGAKASG  
AEVKGDHVVVHLTDAQGSPLIETDAALVSVGRTTNIDGLGIEKLGMRVERGYIITGEYH  
ETSCAGIYAVGDITTYPQLAHAASKAGEIVAERVAHLLKGAPNPREHVLDRHLHVPSAVYC  
EPEVASFGLSEASAKEKAIQYEVARFPYRGNRAVAVEAPEGQVKIVFDPDTKAILGASI  
VGESAADTVHELLLASKAELTAEDVAELVHAHPTISETIMEASKAVLGHAIHI\*

>SPBDM4\_v1\_50533|ID:27158896|arsC| Protein ArsC [Uncultured spirochete bdmA 4]

MVRALFLCVHNSARSQMAEAFCKKYGGENFIAESAGLEPGTLNPYAVRAMAEVGDISKN  
QTKSVDFHKEGRFYHVVTVCSKEAAERCPVFPGAPITLHWPFDPSFHHGSDDEIMTK  
VRFIRDAIEKKVQEFVEAWPRVIE\*

>SPBDM4\_v1\_50534|ID:27158897| putative NADH dehydrogenase/NAD(P)H nitroreductase [Uncultured spirochete bdmA 4]

VDLNETLRTIFSRKSVRAYAEGTIPKEKLEVLARAGMAAPSAVDQRPWEFIVITENAMLG  
DLAARLPYAKMAAHASAAIIVCGDMRRQWGGSESVMWVIDCAAAAENILLAAESMGLGAV  
WTAVYPHPDRIHPVRELLGLPDYIQLCLIPVGI PRGGEKAKDKWNTERLHWERW\*

>SPBDM4\_v1\_50535|ID:27158898| Regulatory protein ArsR (modular protein) [Uncultured spirochete bdmA 4]

MVNILTKVFQHCNIAIMKSIERYERRAEIFKALSNPLRLIMLEKLEEKPWCV CALAAEL  
GIDKSIVSKYLSQLKSVGLIEDSHKGTLVEYRLVAPCVLRLASCAEETIQKQRRKLLSED

\*

>SPBDM4\_v1\_50536|ID:27158899| Redox-active disulfide protein 2 [Uncultured spirochete bdmA 4]

MKIQILGTGCSKCKLLEQHAREAA TELGIQAEFEKVQEVEDIMAFGVLMTPAL AIDNEVK  
AVGRVLTKDQIKALLS\*

>SPBDM4\_v1\_50537|ID:27158900| conserved membrane protein of unknown function [Uncultured spirochete bdmA 4]

MSTKGWTSNKKLLVLFVFLAA YFIPFHS PRVSGAVNEAFLMLSEYARQHVVLC LVPAMF  
IAGAITVFLNQQSVMHYLGPDAKRLTAYGVASVSGAILAVCSCTVLPFKGIYKKGAGLG  
PAIAFLYSGPAINILAIVLSAKVFG LKGLARAVTAIVFSIVIGWLMALIYRKDDEKRAA  
DVRLFSAPSDGEPRTLGTAIYMASMIGILVFANWANSRGGSPWD AIYSAKWWITGGFG  
LILAYAVIRWFNADERIAWVATRDFALQILPLLFGGVLVAGFLLGRPGHEALIPNAWIA  
GLVGGNSLFANAFAAIAGALMYFATLTEIPIVQGLLGAGMGQPALALLLAGPSLSLPSM  
LVIAGEIGWKKTLTYVGLVVVMSTLAGMLFGTLA\*

>SPBDM4\_v1\_50538|ID:27158901| Cupin 2, conserved barrel domain protein [Uncultured spirochete bdmA 4]  
VFGKHSNTGFHETLPGNHIKTLCYGAHTLLVEVRLEKKAQLPEHKHPYEQTGYLVSGRIR  
MNIAGNVRELESGDSWCIPMDALHKVDVLEDAVVVEAFSPTREEYIKYKNDNDIVS\*

>SPBDM4\_v1\_50539|ID:27158902| HAD-superfamily hydrolase, subfamily IA, variant 3 [Uncultured spirochete bdmA 4]  
MKSNSSSHAGRSAFRAVLFDMDGVLVDSERLIAEAARRMFAERYGLEVQYEDFTPFGAG  
ENRYIGGVAERYGLSIDIVSAKAWTYEYIYQQLARQHAGMRAMPGAVDYVRACRAYGLKT  
ALASAADRKVLINLDYLGLTPDEFDTMLTGGDVTHKKPHPEIYLSAAERLGAAPSACIV  
VEDAVNGTIAGVRAGARVLGITSSFPEGALRKAGASWTAPDLARAPLPWKLTAVPVVGEP  
SGGGL\*

>SPBDM4\_v1\_50540|ID:27158903| Fe-S oxidoreductase [Uncultured spirochete bdmA 4]  
MNTISYAVGSTALNVTLRYLNRNPEKNIPKIADVLMPTTYREDMKRQIATAKKVMQDPAN  
PYRGLIMRAFSELAPNVRKSFLSNFVLSAMVGDRTSMLKVYKCNIPWAILMDPTSAC  
NLHCKGCWAAEYDKTDSMDYALLDRIIREGKELGVYFYIYSGGEPTVRKDDLLNLAKVHI  
DCIFLAFTNGTLVDDAFKALAEVGNFGLAFSIEGFEDATDFRRGNGTYQKVIRGMQNMK  
KYGAPFGFSACWHSKNTEAVGDEKFLDFLIEQGCAGFWYFTYMPLGKADTSLAKPEQR  
EYMFHWVRRMRDTPKIFLIDFWNDGQYVNGCIAGGRSYLHINAAGDVEPCAFIHYSNVNI  
HDVSLLDALRSPIFKQYAAHQPFNENHLRPCPLLDNPGMLAEMVKASGAHSTQPIDKEDV  
DDLTAKCAPAAAKWTPVSEKLWAGELPHYLEAQKRKDEEQERNRAILEKCLKKTKDDASL  
EAAS\*

>SPBDM4\_v1\_50541|ID:27158904| conserved protein of unknown function [Uncultured spirochete bdmA 4]  
MPKMVDHEERKRKIADLALFAQRGYAASFGEIADACGLSRTNVYNYFKNKDEIFHYA  
VSELLDTIAKKIELIIRQQELSLAQKLQKIYQVFTNDIGEGKYTSIILDALRLKRENT  
LAEALDEATKALRNKIEMLFAGETSLPSSQTAFATTLFFSLIESSIMHSLFTDGAFIQN  
NIGSILHMLGT\*

>SPBDM4\_v1\_50542|ID:27158905| conserved membrane protein of unknown function [Uncultured spirochete bdmA 4]  
MFSIPALIKILVIFSLVVIATAKHVHLGLAAAIGGIVIALWQGLTPAAVAVAAVRELLNP  
DLILLVLLAAIMAFSAAMKKSGAMDTFANAIAEAAPSRRVALAITPLLIGTLPMPGGAI  
ISAPLVGAMNDDDSRSPETLSAINYWFRHILELIWPLYPAFILTAGLTKLPITTLMLVNL  
YAPITLFTLGLIFILPRGRESTAHPRLAQDSAPRKLEKTKLHRLVRGIAPLGIVLGSYIV  
LDVIWELAAAPHLGLDATTKSLVGRYAPVLCGIVIGSLYLVKIAAGGPQIFKKSITKSTLGL  
IAVVIGIRIFSALMNAADLAHAASIELASAGIPSIIVIALLPFISGIVTGVLGLYVGLSM  
PIVLGLISSGIPFKAGVVIAGAFGYAGMMFSPHVCMVVTVQHFKATLPSTIRKFAALPL  
GIFVAIASVYGAILMTVMK\*

>SPBDM4\_v1\_50543|ID:27158906| protein of unknown function [Uncultured spirochete bdmA 4]  
VFSSLRIEGGTPDKDKIMNIFAPLIGKAYSRELENALHAAAYAAGDFSLVKFDIEQLQG  
AGAPGALRGVVSIVPQKPVENEFFASLDFQGA VSNISGNL VASLAFLAKELTGPGSALF  
SSVSFVNKTSASMEYFQPFPGPFILPWTRFRFEYDMSASESVPVAIASKFRTYGAGVWGG  
LVLGNIADV MAGYSFENVLTGDDWTSVLTQ NAGALRVALRLDTRDRTA FPRKGIAFTAYG  
RWFSNFGGQFSFAQMEVNASAAIPVRRTDALHLSLFGGTD FVGLVTGAQPAKISYYSTL  
SQPVMFYGLGYIPTSCAGNSVLAGSLEYRHRVKVINELTGGDIYIFANGSAGAVVQYDDP  
STYAMWPLKWSATLGASARLTRHYGILVGASVLGNIDDTDAIMPAFVIQVGSFNHSSVID  
RR\*

>SPBDM4\_v1\_50544|ID:27158907| putative Uncharacterized NTE family protein YlbK [Uncultured spirochete bdmA 4]  
MGCAMNTYRMHSPFRQHRARVLFVCLLLNLAAAAPVAADDSTAQISDQISEPARPRIAVV  
LSGGSAFGIAHAGVLKKIEEAGIPVDMILGTSMGSIVGGLYAAGYSPQAMQDLISTIDWN  
SLFMDPKELPQNMFERAVESMYALRIGFDSKGPNI GTGLLEGQNILSFFTARTIHMAAKP  
DFDAFPVPYRAIAANVLNGDKV VFDHGSLAEAMRSSMSIPVVFMPYEYNDQLLDGGVVD  
NLPVDIAKQMGADIVIAVVS RGKAPDSIDELNTSVEIGSQTGNLFIMQNMQPNIEAADLV  
ITPNLQEFTTASYARAKEI IARGEEAGDAAMPQLRELAAKIA\*

>SPBDM4\_v1\_50545|ID:27158908| putative oxidoreductase [Uncultured spirochete bdmA 4]  
MIPQAPFGRTGHNSSRLLFGAAALARVTQAEADTTLSLVLD SGINHLDTAASYGQAEERM



GPWLKVHRNKVFLATKTEKRTKKEALEELERSLRLRLTDHVDLWQMHVLVKDDEWDVAMN  
EGGALEAFVEARQKGMARFLGVTGHGKAAPAMHLRSLARFDFDSVLPWNWPLSNDPAYA  
AAVRTLLYICKTRNVAVQLIKAFRRPWGERPHARATWYEPLDTPQDIGMALGWAWSIEG  
AFVNSAGDIHLLPTIIKEAAKAPSPSGEAMAEMAQRDLMTDLFA\*

>SPBDM4\_v1\_50546|ID:27158909| Ribokinase [Uncultured spirochete bdmA 4]  
MRILNFGSLNIDYVYRVDEFVKPGETKAAQTLVVFAGGKGLNQLSLAMARAGLNVVHAGKI  
GAEGEFLVKTLNDGGVDTSRIEIAKVATGHAIQVDDKGRNCILLFGGANQDINEAYIDR  
ALAGFGPDEMLVLQNEISSMPSIIAKAKTKGMTIVLNPSYSNLVPSYPLELVDVFIMNE  
IEAAYLSGESAPERANLLMRSFPQARIVITLGEAGSMCAHKGEIVRQKAYRVRAVDTTA  
AGDTFSGYFLAGLVEGMDIAAALDLAAHAASICVTRKGAADSVPWRKELETREQV\*

>SPBDM4\_v1\_50547|ID:27158910| conserved exported protein of unknown function [Uncultured spirochete bdmA 4]  
MRETNNVMRIGISKNRRPMGRRAFFSVLLGIFGVCGFAPVGAQQNGPSQESPMTLEGDWS  
GLLRVGATSLRIVFHVTAADGTQYSATMDSPOQGARGIPVSAVRIDGRNVAFEVAAIGGKY  
SGTLNETGALEGTWKQSGQSLPLNLERQSAQTPQKPAAASGEPSPFPYIVKNVEFSDEK  
AGIQLAGTLTYPKGKGFPGVVLVSGSGLQNRDEEILGHKPFLVLADYLTRRGIAVLRD  
DRGAGGSKGSFQSATTFDFADDAQAAVDFLARQTGIDAHHIGVIGHSEGAIVASILAARG  
AEDTQDAKVAFIVLLGGPGVRGDELLLMQNAALGRASGLSESQIAQANKINRELYSIAMS  
EGDVSTLRKKIVDTMNGVIESTPSLTAQQKEAQAQVEAQADQLLSPWIRTFSLDPSY  
LRRVQVPVLALDGSKDLQVPAKENLAAISAALNAAGNHSATMTELEGLNHLFQHANSGLP  
SEYGEIEETFAPEALKQIGDWILSVGAR\*

>SPBDM4\_v1\_50548|ID:27158911| conserved protein of unknown function [Uncultured spirochete bdmA 4]  
MMIAGTACGHFTDESGRWLMLRGVNLGGSSKVPTVPDGRSHAREGFYDGAHVSVFGRFPF  
PEEADEHFSRLARWGQNFVRLVVPWEALEHAGPLYDSVYLEYLEGIVEAAARHGISLYI  
DPHQDVWSRWTGGDGAPLWTLAVGFEPNHLASGAAMLHQEMGERYPQMOWFSNHLRLA  
CATMFTLFFAGNDFTPGIEVAGEPIQDFLQGRYIEAFGMLAERLAAYPNVAGFGSMNEPG  
EGFIGIGDIRAPRNDLLLPLGLAPTWEAMCAGEGVATTAEHIEVKGGRMRSVGRVSLGTP  
GTRAWKDGEACIWRRVGIWDIEHGEAVLKKPQWFARAGIGSNEASSQNPRFHRIFNORY  
LKPFTAKFAARIGSVAGNMNRFMIFVESSPLGEMPAFTDASLETTPQETGNAPEVSTLVN  
ETHWYDSLTLTLKRWTGFLAYDSTLQKVIIGPRAVRRNFREALARIVRYSRDFMGNAPT  
LGEFGLPFDLNGRKAFRSGDFGVHQRALSAYYEALDANLLSATLWNYTADNTHAYGDGWN  
GEDLSVFCVEDGGGRALAGFVRPYAMAVAGNILRMQFDQGHGRFILEYAPDTSISAPSEV  
FVPMLQFPRGASISVSGATVAEPSLKIEGKTHCALAPTEPERYFMLRLDAKPDAQRCLT  
ILRL\*

>SPBDM4\_v1\_50549|ID:27158912| ABC-type transporter, periplasmic subunit [Uncultured spirochete bdmA 4]  
MKKILFVSVLAVALLFSATAQAKYGPYADKVIYDVRMDQTIAIKDTAEGKTDVFFTGDIG  
KTYKGIQSADLDKLSYAVPSGSWSLLLNPINEAPYTFQAKDGRITFNPLAIRDVRYAI  
NWLIDRKKIVDEILLGAGEPAITAQTPGQPGTYRFNLVPAKLGMTVRGNEKKALEDIDTA  
MKEAANLPANKGKLVKSGQFWTYNGEPVTIRFMIRVDDPTGRLLLEGRYIADQLEKAGLKV  
ERLEYDRSKAGNLA YGSDPAAWEWSMYTEGWGAGATRAWWVDVTISQMYSPIYGYMPGGQT  
EGFWNYENKEIDRIAQKNINGWFLTSDEYWNNDNMKVQEMALKEAVRIYVCSQVQYYVANK  
ARFDARMLYGLGDGLNDWSVRSADIKPDSKGEKVLHITQYSARGGLFMSSWDPVGVDFGS  
DVYSAAIFGACTDPSTFESPNAAKDTPLRVKYDLKNVETKVAAGKEGEPPTGLIDVDKAA  
LIFNSKTKKWETGVEYKDVGDGTYYDKNSAMKAYSKLSGVQYIYGKWHDGQPVTIADIM  
YAIIFTYEWANKDGDGDKYYDEAYASQYQSSLPVSKGVVLNKDGSFTSYFDFNWPMDKDR  
VAATGVVSPKAGNPRSTLVSWEIYEALAKLVAEGSKSGTQYTFAYDPSVTEVDVINPKC  
VADIKAKLQDFAAAKYVPDSIKQWVTPAQAVARYNAAIKFIDTYGNA YISNGPFFISKVD  
YNANYIELSAFRDYPRADYFPKLFRTTLTRIDDVKVPPTAQRNADAKIDVQISAVTYPD  
DTAKAADNKAKVTVTLILADNTEKVYTAKEYVSAGSFQAVIPAKDLGALKSGAYTLVVQSV  
FNTESPAVQASSLVF\*

>SPBDM4\_v1\_50550|ID:27158913| ABC-type transporter, integral membrane subunit [Uncultured spirochete bdmA 4]  
MYKWFALKRVLKGIFTYVIIIIFIMSVLNTVNEQTMRSNIEEQVRAETMRLKNMQPAAIQ  
RFQQQRDDLIHL YRLDRPFMERILYRTWNTLTFNFGKSTIIKSSRGEREVL TIVGEALP  
RSLIFTLAAVIEIIVGII LGLKKAQKPGGSLDR TTSLLTMIVYGMPTFWVAMILIMFFV  
YQLKIFPSAGMHSVPPPQGIMYFIDLLWHMTLPLLTLVVIGFWGISYVVRNIVLNILQED

YIMAARARGIPENKVLFGHTLRTAAPPLITMSVLSLLSSISGAIIFEGIFSWPGLGNLYW  
IAVQQKDIPVLMGDLAITVGIYQIGLILLDLTYGFMDPRIKVGGA\*

>SPBDM4\_v1\_50551|ID:27158914| ABC-type transporter, integral membrane subunit [Uncultured spirochete bdmA 4]  
MNLGDTKYRISEFWSEFRKERSGLVGLAILLSLVVIFEPAILPWKEANSKWRSIDYWQ  
DNSASAPPAWTFNAFTKLKAPVTVRLDDGEKEEAYLDGGVKLVTYTFDYHYTADKAPLDVI  
FHITGHGDIPFQVSVERPDGTTLDLGRFEQGLAGQDIRISVDNDGREAAFTFIKNYSE  
GALEQYSGKSLRTNDILFNTAREGMAREFRPLKGNKLMVKAMLLDPENSDVQKPYVVVT  
GSVSGLLGTDDSKRDLFSGLVAGLKWALLIGLLTSAISVLIGVMYGIISA YFGGTVD SVM  
QFIYQIVNSMPVLPVLIVISAIFKPNIWMLIAVMVLFVFWTGSVMTVRSMALQIKEETYIE  
AAKALGAKKSRIIFKHMVPILIPYSFASMALSVPSAIVYESSVLLGLGDATIVTWGQIL  
HDAMQGAAILKGIWWWVLPPLGLLIAIMGMTFAFLGFSMDKILHPKLKTR\*

>SPBDM4\_v1\_50552|ID:27158915|oppD| oligopeptide transporter subunit ; ATP-binding component of ABC  
superfamily [Uncultured spirochete bdmA 4]  
MNSLLKVENLQMHYFTSKGAVRAIDDISFELTPGETIGLVGESGCGKTSLSLGRMPTP  
PGRYISGKILVDGVDVIPLPEREVRKDIRWQKISMVFQGANCLTPVYTIGRQMMETLNE  
HSDMSRSDAESLITEYLG YVGLSPEIVQRYPHELSGGMKQRAVIATALFLKPEIVILDEP  
TTALDVIVQAQIINLLKLLKQFSLSFIFITHDLALEAISDRLCVMYAGKIVEMGSNAQ  
IYGAQGP GHPYTERLLGATPRLFKKVEQLQFIPGTPPDLIAPPKGC RFNPRCDKAFDRCF  
QEEPPIEIEPGHMSACWLHQRG\*

>SPBDM4\_v1\_50553|ID:27158916|dppF| dipeptide transporter ; ATP-binding component of ABC superfamily  
[Uncultured spirochete bdmA 4]  
MTDTILSIKLNKKYFEPHQSFQTSIGGGGQKKPIKAVDDISFDIRRGEIFGLIGESGSK  
TTTGKLMKLIPTSGKIFLNGEDVTHLDKEKLIAYRRKVQMIFQDPYASMNPRFKIKDV  
LEEPLIIHKVKG TIEERTKMIVKALEEVKLTTPDEFMGRWPHMLSGGQRQ RVATARTLIL  
NPMMLVADEPVSMIDLSTRAEILHMMKDVQKELGLSYLYITHDLSTARYFTDRIAVMYLG  
RIVEIGRADDIIDNPLHPYTQALIEAVPEPVSGKLDI IKELPIFGEIPSPANIPQGCRFH  
TRCPYATDACKSEPEPELTLAGEEHYHACSRA YEIPAERKHKQAG\*

>SPBDM4\_v1\_50554|ID:27158917| conserved protein of unknown function [Uncultured spirochete bdmA 4]  
MEIIDRRIFPIMRALSDEKAILVLHGARQTGKSTALHWWLQEERNRGRQTL YFDLED PAM  
LSLCESGVEAFIRYIEARGYPRQNL SVALDEIQYLS DPSRFLKLLFDHHSDDLKIAVSGS  
SSFAIKSKFRESLVGR TIPLLEFNLDGGEYCRFVGRQYDFSAEWPEQLDLEVRPVFQHFA  
ETGAYPGLARTKEIATKSRIRQIIQTYIQTDVREL GKIRYPDRFESLLRFLADQAASLA  
QVSELA SLMARETVEEYIFLLEQTYIIRRLRPFSGNARSELTKTPKIYFEDNGILAMC  
RAYEFLPLDGFALFENAVFTEL RKSFGIERLHFWR TTEGQEIDFIIDEGRVAVEAKLRPRP  
ADCKNLFKFQKRYSAKRLVICGMEKPVSLPEGVEFRYPWHLADSVGQQ\*

>SPBDM4\_v1\_50555|ID:27158918| SufBD protein [Uncultured spirochete bdmA 4]  
MAEQAIVDKEALLEELLASINQHKFTPDVAHVEIHGNQVLNKNLVDGLMVEAESIEDGVK  
VHIRVKS GVTLNPNVFCFLIPENGVQRII IDTVIGEGAHAKFIANCTFPNAVNIQHLM  
NATITVEKGASLSYFERHVHGPNGGV TIVPVTKVLVGEDARFSTEFELIKGAAGVVELEY  
AAEVTKNATVDMTRIFGREGDRIHIKEAAHLSGEGSTGVL TSHIALKNRASATIENELI  
ADAPYARGHVDCKEIVQDEATARAIPVQVNNHLAHTHEAAIGSVDSKQLETLLSRGLT  
EDEATDLIIQGLLS\*

>SPBDM4\_v1\_50556|ID:27158919| conserved protein of unknown function [Uncultured spirochete bdmA 4]  
MDLLEIKNLSLFKEGRPILNLSMDIWEGHVHAIIGPNGAGKSTLANTIMGLSGYRDFEG  
DVLFEKSIKALPVDERARKGITLLFQEPARFEG LGV SQFILAGAKEKSRAVVEDALQHA  
GLSPEKYMRAVDKTL SGGERKRIELASIAMK PRLVLMDEPDSGVDIDSVKYIFAVIKE  
LRHRGSTFILITHSPEVLKHADHAFLICAGTLVDKGEMSRMFDYFNGKCVPCVHV GQPTV  
DAAVQPLAAN\*

>SPBDM4\_v1\_50557|ID:27158920|ltaA| L-allo-threonine aldolase [Uncultured spirochete bdmA 4]  
MNYIDLRSDTVTWPTSAMRKAMAEAAVGDDVY GDDPTVNELERLAEEMTGKEAALFVPSG  
TFGNQLSFTWCPRGSEVILGEQCHIIQHEAGAASVIAGVQTRPVFAPDGILPIEAIEER  
IRGNDIHFPTSLVCLENAHSSGRVIPLSYMKNVSEL AHRYGLPVHLDGARLFNAAAALG  
AGAAEIAGTVDSVMFCLSKGLCAPVGSMLAGPRDFVERARRKRKVMGGGMRQAGVLA AAG  
LIALKDMTRRLAEDHKNARYLAGQLGTVPGLEVDAEALDINMVFFRLPAGSDGDALVSHL

KAHEVLINPPELGLCRFVTHYWIDREAIKVAALMADFFKRG\*

>SPBDM4\_v1\_50558|ID:27158921| conserved protein of unknown function [Uncultured spirochete bdmA 4]  
MNRKDIAIEDFRYDPAQLRDHWLSLAFAGDFNSGAYNAMTISWGSYGQIWNKMFFQVFRP  
TRHTYEFMERYDTFTLNAFEPKYKQALSILGSKSGRDGDKIALAGLTPMASREVAAPCFR  
EASLVIECRKMYWQDIDNTHFLDSGIEGNYAKKDYHRVYFGEIAHVSRA\*

>SPBDM4\_v1\_50559|ID:27158922| Uncharacterized ABC transporter ATP-binding protein TM\_0288 [Uncultured spirochete bdmA 4]

MAYETTSSIQDVRTSFQRRPGRPTRFEKASDPRKAMIRLFGYLKPFKKPLASVVCVLLQ  
SLLGLAGPYLLGRAIDTSIGGKDVRSLNNTAALMLIAYVLSNGFNILANWRMARISQNAL  
KNLRGDLFAHIQSLPMSFFDTNPAGGLMSRLTNDIDAINQTVSQNIALLASIITMLGIL  
VSMFVLNHWLALASLVVIPIMYWFSNFVAKYTRKGFRELQKDLGNLNAVAEETISGFKEI  
KAFRNRNSAIEAFRQKNQAVFKSAVYANSYAMLLMPLTGVLSFFVIVLASLGGWLALKG  
LVSIGMIATFINYAQNFTSPLRQLSNLYNSIQAALAGAERVFEIIDMESETAGRDETNSR  
HKTRADGQAAEAGAPRPRVPFHLDGFGQNVTLQNVVFGYGPDNVIRDFSVEIVAGQTV  
LVGPTGAGKTTITNLLTRFYEIQSGRILFDGVDIREIPKKDIRRAIGLVLQDTFLFADTV  
LENIRFGRLDATDEECIEAAKMAEADHFIRQLPDGYHTNLSERAGNLSQGQRQLLSIARA  
ILADPRILILDEATSSVDTRTELRIQKALLRLMEGRTSIVIAHRLSTIRDADSIVVINDG  
EIVEQGNHEALLGQRGFYHYLYMSQFKGNEI\*

>SPBDM4\_v1\_50560|ID:27158923| ABC transporter related protein [Uncultured spirochete bdmA 4]

MNEFKLLHFARPYWKLAVFSLVMLVAMVGFDLAVPRLVGRIIDKGIRQKDLTVVMTTSA  
IMLCISMLSALVAVLNSISSIRVGENIARDLREAIQNFVQNFYGNIDRFSTAKLMVRLM  
SDTAAVQRLFQMSLRIGTRAPLSMIGSIVLMFVTSKTLALAMMPILVVSIGVIVFFSTRL  
EPFFRTVQQLDRLNTVLQENIAGARLVKAFVVRGKYEADRFDTANASLAQENIHVMQLMA  
SMSPILLLINIGIVLVVWLGGLQTIHGNLSLQIIAFTNYLMATLQPLTMMTQLSNNWA  
NGLASAKRINEVLDAEPEVAELPDATSLPSIQGEIEFDHAGFHYNMGDMEDIAVLENICTR  
AEPGKTTAVLGATGSGKSSLVNLIPRFYDASAGSVYIDSQNVRTLKGDSILEHVSIVPQD  
TVLFSGTVRDNIRYGRPEATEEDVIAAATAAQAHGFIMNMPAQYDTHIEERGVNLSGGQK  
QRIAIARALVCKPSILDDATSADVETETKIHTAIKSAQGTTVVMVAQRISTVLNAD  
KIIVLDKGRIAAEGTHRELLRTSPIYREIYDSQLGAGVRHGL\*

>SPBDM4\_v1\_50561|ID:27158924| protein of unknown function [Uncultured spirochete bdmA 4]

MDESETKLDVAVVENLLEVLPSVWDRIRSNFRSAGTSKFGISMEQFHTLRHIYKGYCHGGE  
IAEKRVSCSAVSQAIDALVAKGLVTRIQDSADRRQVRLELTVHARHVLDENAEENRSYI  
RQKMSDVEPEEREAVMRAMGILKNTFLST\*

>SPBDM4\_v1\_50562|ID:27158925| Transcriptional regulator, AraC family [Uncultured spirochete bdmA 4]

MKINDAVYVYRLISGERLAWHGRYHAHGPGEYEFHYFMEGQGALLINRAKYIIDGNRIYF  
VQPREFHSILPEAVEKPISYYAVLFRPEPGNPVDEEIVGLMGHLWHARNRALPADAKDRF  
FLDDLRYLSKSSSERSQKSAEHALISILYRWFDFHFDSTSEDVHSGGKNEHVERALALMM  
KHVREKLSSDDLAAMLGLSEEYFIRLFRHHLGMPFFQYFTRLKIEAASAVLVDNQLTISD  
IAYRFGFENPFHFTKVFKKCTGLSPREYRKIFFEAGKPPQTAAPLT\*

>SPBDM4\_v1\_50563|ID:27158926|XylB| Xylulose kinase [Uncultured spirochete bdmA 4]

MKSVCGIDLGTQSCKILYDPGAKQIIAKSQSSLDIIARNDGTREQRAEWYEEALLACFQ  
AISPELRATITAIGVSGQQHGFVPLDGQGRAIRPIKLWNDTSTAAECAELTRRAGGEASL  
LSETGILMLPGYTAPKILWLKKHEPENYARVRHVLLPHDYVNFLLTGNDVTEYGDASGTA  
LFDVRRVRRWSRRICDLIDPSLIDYLPVSLVEPKPAGRVNAAAAAHFGIPEGVLVAAGGGD  
NMMSAIGTGTVRDGFSLTMSLGTSGTLYGYSSRPVVDPEGNLAAFCSSTGGWLPLLCTMNC  
TVASEQIRALFGMSIDEMNVRAASAPVGAEGIVVLPFFNGERIPNLPQGRAGILGATAAN  
FTKENIARAAMEAAIFGMRIGLESFRKLGFTAREIRLVGGGAKSGLWREIAANVTGLPVR  
VPKEEEAAALGAAIQALWCFECNAEAAVPIDIAALTAHVSLEGGTSIEPEMTLVSRNEA  
AYDEYAKYLAALSPLYR\*

>SPBDM4\_v1\_50564|ID:27158927|XylA| fragment of D-xylose isomerase (part 1) [Uncultured spirochete bdmA 4]

MADYFVGHREYFPGIGKVRYEKSDNPLAFKYYPDRKVGDKTMREHLRFAVAYWHSFG  
ADGTDPFGDATHIHPWTTDATTAEAEHEHKLDAEFEFTKLGADFYCFHDRDMAPEGDSF  
GQSEKNLAHMVALAKERQKATGVRLWATANLFSHPRYMNGAATNPEFGVVAQAASQVKA  
AIDAAIELGGQG\*

>SPBDM4\_v1\_50565|ID:27158928|xylA| fragment of D-xylose isomerase (part 2) [Uncultured spirochete bdmA 4]  
VFWGGREGYMTLLNTDLKREKDHARFLTMARDYGRTHGFKGVFYIEPKPMEPTKHQYDF  
DVETVAGFLRAYGLEKDFRVNIEANHAELAGHDFQHELETAASLGIFGSVDANRGRDPRNG  
WDTDQFPINAYDTTLAMYAILRAGGFTRGGLNFDKIRRNNSVDPSDLFEAHIGGMDAFAA  
GLLAAQHIIEDGKLEAFVRQRYASFDGGDGRRFEEGRMNFEELATLASSPGAANADKVGR  
TSGRQEHLNLMQYVVLGVK\*

>SPBDM4\_v1\_50566|ID:27158929|chvE| Multiple sugar-binding periplasmic receptor ChvE [Uncultured spirochete bdmA 4]

MKRFLVLLVVALMLVLSYSFAQSKNVLIGVAMPTQSLQRWNQDGANLAKLEAKGYKVVVLO  
YANNDVNAQLQLENMITQGAKMLVIASIDGSVLSVDLKEAKSMGVRVIA YDRLIMNTPN  
VDYYATFDNFVKVGIQGGYIESRLGLKEGKGPYNIELFAGSPDDNNALFFFNGAMSILQP  
YIDSGKLVISSGQKNFTTIAIQGWDSGRAQSRMDNLITANYASGKKLDVILSPNDSLAI  
IVASLKNNGYGTASKPYPVLTGQDCDKANVKAIINGQQSMSVFKDTRDLAAQVEMVDAI  
MSGRTVPVNDTKTYNNGVKKVPSYLCTPVFADKNNYKQLLIDSGYYKESDIQ\*

>SPBDM4\_v1\_50567|ID:27158930|xylG| fused D-xylose transporter subunits of ABC superfamily: ATP-binding components [Uncultured spirochete bdmA 4]

VENDLILEMKDITKQFPGVTALKNVTLAIKQGEIHALVGENGAGKSTLMNILGGVYPHGT  
YSGHIIFEKVERTFREVRDSEKIGIGIIHQELALSPYLSVGENIFLGNERARHKIINWDT  
TYSDAKGLLDLVGLKENPHIAVKDISVGGKQQLVEIAKALSCKVLLILDEPTASLNEDDS  
EHLNLLLDLKKQGLTSILISHKLNEIAQVADSITILRDGEVIETLEKGGKDPIDEDRIK  
GMVGRELVDRFPKRIPKIGDISFEVKDWNVFSPLNPDQRVKNASIKVHKGEIVGIAGLM  
GAGRTELAMSIFGRSYGLHIRGTLIKDGVELQLKNVRQAIDHKIAYTTEDRKTAGLNLIG  
DIRENITIAALGSISSNYVINNEKEIKVSEMYRKKLNIRSLNIFQKAGDLSGGNQQKVVV  
SKWIFAEPDVLILDEPTRGIDVGAKFEIYTIINQLAEEGKSVIFISSELPEILGISDRIY  
VMSGKIVGEFMKAEATQEGIMKCMQSIGGNSNGEY\*

>SPBDM4\_v1\_50568|ID:27158931| Inner-membrane translocator [Uncultured spirochete bdmA 4]

MENIKYFLKNNIRQYGMALIFIIFFQIMTNGILLVPMNVTNLILQNA YVFILAIGMT  
ITILTGGNIDLSVGSVVAFIGAICGTFIITMKMDVGIALILALLIGVLIGVWQGFWIA YV  
RIPAFIVTLAGMLIFRGLTVFMLKGLTINPFPESEFQFISSGFLPDIKNAFGKYHATAII  
AGIAIVVFYILSQIKRRAAQRNGFDVMSGPLFLLQLIIVSAFIMLIAIWLAA YKGLPVI  
FIIIGILILVYSFFTTRTPGRYIYAMGGNEKAARLSGINTNKVLFAYVNMGALAAVAG  
IAYTARLNAAS PQSGLNFELDAIAACFIGGASAYGGVGTIVGSIIGALVMGVLNNGMSIL  
GIGSDVQQIVKGLVLLLAVAFDVLSSKKAH\*

>SPBDM4\_v1\_50569|ID:27158932| Oxidoreductase domain protein [Uncultured spirochete bdmA 4]

MIEGSAGAKTSRKLRYGMVGGGKGAFIGDVHRRRAIALDGLAELVAGSFSQSFENTLETGA  
SLGLSRDRLYATYSEMAEKEAARPDGIDFVSIVTPNALHYPVAKAFLNAGINVICDKPLT  
FESEAKELDELAKKKGLLFGVTTYTYTGYPVVKHAREMVRRGDIGEIRFVNAEYPQEWLA  
TPSEREGSKQAFWRTPALAGKSNVGDIGSHAENMVS YVTGLKIKSLCARLDTFVEGRL  
LDDNATIMVEYEGGAKGLYWASQIAIGYDNGLRIRIFGTRGTIQWSQENPNYL VVSKLGA  
PTEVLSRGRDGFYPHAQSYSRIPSGHPEGYFEAFANLYKTYISALAKQKSGEKLTSDDL  
FPSADDGVLGVRFIGKCVESKKGAVVVKF\*

>SPBDM4\_v1\_50570|ID:27158933| Xylose isomerase domain protein TIM barrel [Uncultured spirochete bdmA 4]

MARPVTIFSGQWADLPFEQFCEKVKSFYDGVVEIACWGDHMDVKRAATDPKYVAERKAIL  
EKYGLKCWALGAHLGQCVDLWDPRLDGFAPAECCKGNPAKIREWAIQEMKYAAQAARNM  
GCYVVTGFMGRPIWKYWYSFPQTTDQMVDGFAEIVRLWTPILDEFDRCGVKFALEVHPT  
EIAFDYYTAGRLLEFEDRPTLGFNFDP SHLIWQGVTPHIFLRDYAKKIYHVHMKDAAVT  
LDGRAGILGSHIAFGDTRRGWNFRSLGHGDVDFENIRELNAAGYQGPLSVEWEDSGMDR  
EYGAKEALEFVRD VDFAPSTIAFDEAMKK\*

>SPBDM4\_v1\_50571|ID:27158934| rbsA| fused D-ribose transporter subunits of ABC superfamily: ATP-binding components [Uncultured spirochete bdmA 4]

MEVIVKTEGIAKEFSSVRLNDISVEIRAGEVFGIIGENGAGKSTFIKILAGLYQPTAGK  
LWFDGKA VEIRNPADARGIGISLIPQEFNLVSDLCVYENIFLGEELVQKNGFLDIKAMVS  
RTRQLLSELDVSSIDPYARIQDLSVAQKQMV EIAKAI AFDSRFLIMDEPTTMLTSKEVEI  
LFRLIERLKAHGV TIVYISHKLKEVKRICDRVMVLRDGEFISLEEIANIGIDEMARRMVG

RELKEIFPEKKPAAGEVVLVSVHNLSVEGLLDHISFDLHVGEVLGFAGLIGAGRTELAETI  
MGLRRAESGEISLRGKPLQLRKPWDAVHAGLSYLSEDRQSGIITSFDVVKNITLTLRE  
YAKPFISQKAEIEKSKFYVDRFSIKIPSLFAKLEQLSGGNQKQVSLAKSIDTQPKIIID  
EPTRGIDVKAKRDIYVFRGLANAGISVIFISSELEEIIIGMCDRVLIMRSGRIVGELPSE  
KLSEEEIMYFATGIKGGY\*

>SPBDM4\_v1\_50572|ID:27158935|rbsC| D-ribose transporter subunit ; membrane component of ABC superfamily  
[Uncultured spirochete bdmA 4]

MAVSIPKLSLDKYGPLIALVALVIVSTILYPRFIEIRNLLNILRQVSYTGIIALGMTFV  
IISGGIDLSVGSMTALAGAFAILTLNAVVTQGLMMFSPGWLGTLLSILAAAAVSIVIGLAA  
GFVNGFLVTKGRIAPFIVTLGTMAIFRSLTLYIGKAGEFRSVSSSYGDMGMSVILGIPLP  
VWIFFILAALLSFVLNRTKFGRYVCAVGSNEKVARYSAINVDKVRLLSYVIVGLMVGITA  
VLISARLNSLSSTNAGKDYEMDAIAAVVIGGTAMTGGKGSVWGSVIGAMILGIINMLNM  
LGVSPYLQGLVKGIVIIGAVSIQRGWFFNNGRTEK\*

>SPBDM4\_v1\_50573|ID:27158936| ABC-type sugar transport system, periplasmic component [Uncultured spirochete  
bdmA 4]

MKKALIAMMVLIAIVMPSFAQVKVIGVSIPTADHGWTTGGINYYAQKAIKDWQAKDKNIE  
FYLVADSPAKQVNDVEDLMVKGIDALVILAHDSAPLTPVVKKAYEKGIVVSVDRGLTE  
EVQDVYIAGDNPGRVSAEWLKGALGGKGDIVVLEGIPCINSEVDSFKDVMKYPG  
IHILDSQPAYWDTQKGLEIMTNYLQKYKKIDAVWAQDDDLVGVVLQAYKESGRKDVKIFL  
GGAGSKIMIKKVMGDPLVQADVTPPSMIGTGISLAVYGSRNQPLPGFYQQKIPSKIL  
AAELITKQNAKDYYQPDSIF\*

>SPBDM4\_v1\_50574|ID:27158937| exported protein of unknown function [Uncultured spirochete bdmA 4]

VKNMKLLRRNGVIAFMLVFAVSAGAQQQAPDFADLPAVLDHMLDNHYMPSVQVGMGSFTY  
GDTQLPTPFARWFEDELRLGLAQTTRMKLFDRQVAAAMDPAIRAQYSEFFGQDRADSILY  
GKYAEDAGGVAVTLSLDLATGTLIAEKRYEVPRAIPSDVTVQPSLKTQVQTAMALSQV  
PGSGGQISGVPDLMLTLSTDRGVGAVYRDGEKLTLYITSSKDAYLKIYHVDVNGIAQLIW  
PNRFGGSGKVKAGEALKFPGPSDKFYVLRPGYGTETIKAVASTRPFATMEADFSDLQGA  
AAEAITRGLSVASSDTTRAALAVYEILP\*

>SPBDM4\_v1\_50575|ID:27158938| protein of unknown function [Uncultured spirochete bdmA 4]

MKTNFAHLTLEEKSVARLKASLALRLAEESYASDELQKICPSRGISMKLSIRGAGPSL  
HLRVPQSSRRPSLLLFFPNIESAVRVLGSAKGTAVPIPLDAGALKTLAFFRRASNRATE  
LLRAADTPAAIRARLLLAATLYGLEAIAGESYLERRMQIIPDGVVGVVRAEIAIRVAKEG  
RTIHVDRAVPAEADGVVSAVNSPRPDAVLSFAHYQSAIDVLSGKRQAVVALGSGEVRIGG  
LLPLVQGLFAVLDRLSWYMGVEV\*

>SPBDM4\_v1\_50576|ID:27158939|fumI| Aminopentol aminotransferase [Uncultured spirochete bdmA 4]

MSDISGEESGAAGGISGRGADTQDSRFAASMA YFERAAKVIPGGIYGSKSPGFLVPGHFP  
YYLSRARGSRIDADGNEFIDYLCGYGSQIVGYGNPAVDGPALEQARKGDLLNQPHPVMV  
ELAERLVGLVNDMDWAVFVKNGTDATTLATSIARADTRKQVIISAEGAYHGAANWCSTNV  
FPVFMQAEQRDVRFFPYNDIQALEALFAANRGNACIILTPYHHPTYKPQQLPTPEFLTA  
VERLCRAESAYFIMDDIRANFRDLVHGSHTFFGAHPDLITMGKALANGYPISVLLGTDGL  
RKTASSFFITGTYWMSAVPMIAAMATLDEMERMGGTAQLARHGRMLKDGLLESLGREAGFR  
ARVSGPLAIPYMTFDEDPDLYLNQRFCAAMADRGVFMHPHNWFISLAHTEEDIARTLEA  
ARSAFEELRLFSSSERF\*

>SPBDM4\_v1\_50577|ID:27158940| putative integral membrane protein [Uncultured spirochete bdmA 4]

MTDVLLILFVVLFPVALLYLKEHVALMAKWSTLIVCYIAGLVLGNIGILPLSATGLLDTI  
SSVAVAIISPLLLFSVDFKKWRELSGGAILAFLAAISVSLVAGIAYAFFRAKNAESYKV  
AGLLVGLYTGTPNLAAIKTALNVDKNVYLA VHTSDIVLSAVYLLAVMSVAKPILKHFLP  
LKNWDTEVASPTGLNFTTQFSDYFKKGLWKKILMGFGLAAAIIVGVSLGLSTLVPADSQTM  
VTILLVTSALAAASFVPSIRALPMTFATGEYFLYVFAVAVGAMGNIMQIFNSAGTYFIYV  
AIVLFGSFILHVLLCSLKFIDVDTMLIVSVSAICSPPFVGVVAVSLKARKLILPGITTGI  
IGYAAGNYLGIALLAEALKALGG\*

>SPBDM4\_v1\_50578|ID:27158941| Oxidoreductase, short chain dehydrogenase [Uncultured spirochete bdmA 4]

MHQTLAGKVWITGASSGIGRALAAEAARRGARLILSGRNEGALRETA VLCGGYRTAKAL  
ADGAPRLPADALLPFDLADPGARRKAAQEALVLFDRIDTLVLNAGVSQRARFAETSPEVF

DLIMQTNFGAAVDLTRA VLPQMRDRDSGMIICISSIAGLMGAPWRTAYSASKHAQAGFFS  
SLRAELYGSGIHIAMVYPGFVRTSISENALS GDGARHGELDPLQKSGQEPSETARIVWDK  
LETGALDIKVAFD FKAHLGVFLARYFPKLFVRSISKHGGL\*

>SPBDM4\_v1\_50579|ID:27158942| putative signal transduction protein with CBS domains [Uncultured spirochete bdmA 4]

MKVGQRMTRNPITITPDMTAPEAQAIMRREKIKRLPVVDYNGRLIGIVTSLDLIHASPS  
ASSLDIYEMHYLLSKLKVEKVMTKNVITVTEDLPIEEAARIMADNSISGLPVMRGDILVG  
IITETDLFKLFIELFGARHKGIRLTLLPEKKGELAKLSNAITKSGGNIVSFAIFEGEDP  
TNGYCTVKVTGVEKDVLEAIRPLVEKIVDVRET\*

>SPBDM4\_v1\_50580|ID:27158943|livF| leucine/isoleucine/valine transporter subunit ; ATP-binding component of ABC superfamily [Uncultured spirochete bdmA 4]

MALLELKDVRTFYGNIQALKGISISVDEGEIVTLIGANGAGKTTTMSICAITPLRSGQI  
LLNGKEISRVSPNKIVKMGVSQVPEGRRIFPQLSVSENLDMGAFRLTDKEGIKRDMEEVF  
AIFPRLAERRNQLGGTSLSGGEQQLAISRALMANPHLLLLDEPSLGLAPLVVQNIFEVIQ  
KINKERKTTILLVEQANMALKIANKGYVMQNGVIKIADTAAHLENEEVRKAYLGL\*

>SPBDM4\_v1\_50581|ID:27158944|livG| leucine/isoleucine/valine transporter subunit ; ATP-binding component of ABC superfamily [Uncultured spirochete bdmA 4]

MSTQQLQSKDAILEIDNLVMTFGGLRAIDGVSMHIDEGEIAALIGPNGAGKTTIFNCITG  
EYRPNEGTVKIRNREGHVVEIHGLKPNVINQKGLARTFQNI RLFSNMSVLENV MIGRHNS  
LKAGIFKAILRDASTREEEQRVIEESYLILKKLKLD MYVNETAKNLPYGEQRRLEIARAL  
ATDPFLLLLDEPVAGMNAQETKELEETINIIRDQEHITILLIEHDMSLVMDVSERIYVLD  
YGKLIAEGPPHEIKRNPDIKAYLGE\*

>SPBDM4\_v1\_50582|ID:27158945|livM| leucine/isoleucine/valine transporter subunit ; membrane component of ABC superfamily [Uncultured spirochete bdmA 4]

MKVR SILADVRKSLGIAVWAMVLLFPLMVMKVS VTRGVAQVQFRWNLLPFVGIAGFVLSF  
VWRIALEWKDRRGNNKSEGAFSRVKAWGGQYFARPAVRKSSLVALLCFVIAYPFLFGMYH  
TNVMITAFIYVILALGLNIVVGLGGLNLGYAAFFGVGAYTYGLMWKYLGH SFIAAGIDP  
GWLFWISLPLAGIMASLFGILLSPLVLRGRDYLAITLAFGEIFHMVMQNSSDITGGAT  
GISLIPRPWFFGHKLPPPQAATYIYFIAIVLVIIITIFIVRRIEDSRVGRALEAMREDEVA  
CEAMGINLVKNKLITFALGSFWAGIAGVIMAAQT TYINPDSFTLWESIILMAVVIGGTG  
SIPGVIGGAILL KLLPEYFRALAQYRMLIYGIAMVLVIIFKPDGLIPRKRKQYTFEEKEL  
SK\*

>SPBDM4\_v1\_50583|ID:27158946|livH| leucine/isoleucine/valine transporter subunit ; membrane component of ABC superfamily [Uncultured spirochete bdmA 4]

MEYFLKLFLSGTAKGSIYALIALGYTMVYGIQLINFAHGEIYMIGGFTALIFGGFFFSK  
GMPVGFVLLFSVLLSIIYAAAFGYTIEKIA YRPLRGKPRLSALISAIGVSMVLQNFVLLA  
QTEKFLSFPSYLPFKWLQPYKEYINSTQLIILGVTAVIMVLLTFLIKFTRMGKAMRATA  
QDMHMAQLVGV DINQVISVTFILGSALAAIGGV LICSYMGQINYYIGFIAGIKAFVA AVL  
GGIGSIPGAVLGSFVLGWTESLGTGYISSDYEDAF AFIIILIVILLIKPEGILGRTQRQKV  
\*

>SPBDM4\_v1\_50584|ID:27158947|braC| Leucine-, isoleucine-, valine-, threonine-, and alanine-binding protein [Uncultured spirochete bdmA 4]

MKRRNMVLA VFAMVSL LALFGTQSVFAAPIKIGVAGSHTGDLASYGLPTVNAAKLVVKDI  
NDKGGINGQKIELVIEDDQCKPELATNAAAKL VSAKVVA VIGHICSGATKAALGIYKDSK  
IVTISPSATNPPLTQSGEYPNFFRTIAPDDAQAKLAATFLAKTLK LKIAVLHDKGDY GK  
GFAELVKQYAEENGIQVALFEGINPGAPDYS AVINKISNAKVDGVVWGGYHPEASKLVQQ  
MKDKGMNIPFISDDGVKDNTFIEVAGKYSEG VYATGPTDTSTNPLAIKAIADHKKEFGAE  
PGAFFLNAYAATQALLNAIAKAGSTDY NKIVAALQSEYVDTP LGHISFDKRGDIIGFGFS  
VFQVQNGKYVELK\*

>SPBDM4\_v1\_50585|ID:27158948| ABC transporter substrate binding protein [Uncultured spirochete bdmA 4]

MRPTTKLFAAIGFAGMLLFCASKNAKIVGVAKFVSH PALDAIEKGIVDELSSSKPDYKI  
DLQANADMNTAAQIAQRFKQKVALAVGIATPTAQALANQIKDRPVIYSAVTD PVSAGL  
VASMDKGGANVTGTS DMTPVREQDLLRSLKPDIKRVGNIYSSGEANSVALAAIVRAYCE  
ENGL EYVESTITNSSEAKQALLSIAGRIDGLYLGNDNTVFSALS GIAEVALEKKIPV VTA

DPSSAETIPVLAALGYDYRMRMGVATGKIVVRVLNGEKTADIPAFLPKDSEDMTFVLNLD  
AKNIGVTVDQSIIDRAKVIISDGGQLTRK\*

>SPBDM4\_v1\_50586|ID:27158949| ABC-type transporter, integral membrane subunit [Uncultured spirochete bdmA 4]  
MIEGILVEGLIYSILALGVFVSFRVLDLDFPDLTVEGSFPAGAAAGAIVASSLSLSPNAFAK  
ALAVPAGMLAGFVAGGVAGFVTAAYVYHRLKVPPLLAGIVTMTGFYSINLRILGGKPNLPL  
ITNNPMLKLARSFMSGILSPEWSLLASCILICLVLFGLLDLFFHTEIGIAMGALGDNENA  
VIQAGIQPNRLRAWGIMLANALPGLSGAMAAA YQGFADVNLGQGVVAAGLATVMLGELVV  
HSQFIGVQLARVFIGSIIFRALMYAARSWGYVAGITPNDLRLLTALLIIVSVAISRYGRK  
HR\*

>SPBDM4\_v1\_50587|ID:27158950| Phosphonate-transporting ATPase [Uncultured spirochete bdmA 4]  
MIRLHNIEVSFDLGGGQEHTVLKNLSLEVERGQTVSVIGSNGAGKSTLLNAIAGTVPVRA  
GKIFLDDSDVTPLPEWARAMYVGRVRQDPLAGTAGDMTLLDNLALAYRKGPRRFRIATPP  
KFAREMADKVAELGMGLEDRLRENVSRLSGGQRQALTLLMAILSRPSVLLLDEHTAALDP  
ANAEIVGELTRRFIAEFNLTALMVTHDMKRALEQAGR VMMHEGEIADLSGAEKEKMDV  
AGLVRLFVKVRGAEYAEDRDLLI\*

>SPBDM4\_v1\_50588|ID:27158951| Sugar ABC transporter [Uncultured spirochete bdmA 4]  
MKKRYSAVFAILLILLTVVPAFGQTKKQLTFLFMPGVQDPFYTTMEKGVRAKAKELGVNI  
IVAEYPKAWGPEYQVPILQAYAQRGGFDGLLIAPTSVDALKAPLKAIDYDKGIEIITVDTF  
LGDGDYSKPNTDYNFPLSYIGSDNELGGKMIAEHLAKLVGEKGVFCEATNPDVSSVAGR  
VKGFTGVAEFPNMKLVGVWCLDVQQKAQEQLAALQRDKDIVGIFGTNVFSAQGANQA  
VVNAGLVGAIKIASWDATITNIDNLKKGVVDLVLAQKPAEMGSLGVEWLYKYLTQKVQVP  
KKVIPGFEFFTKDNVNDPKMQQYIYQ\*

>SPBDM4\_v1\_50589|ID:27158952| putative Ribose transport system permease protein RbsC [Uncultured spirochete bdmA 4]

LADKGRPLAGIPGGGSPSSKGPSSISDQTRGGFFQTTFRQTAFGQFTARNWALLFLILM  
IVIFSFAAGPFFDIVNFQNIHLSTGTFLAAAEATLVVITGGIDLSIGYVYGLASVLGAK  
VMQILGAGGMPVPLVIVLGLAALLVSILPGLNGVLTFRKVPPIATMGMWGICNGVT  
LFLSDGFMPVMGAPSQINDIGNSYFLYIDPSKTVSFFSKPPYITLTSIRNIRRLIPNSLF  
LTLLVLFILGFVMSRTRFRHTYAIGGSMDDAAVRAGINVDRHLVMIYVISSFVSGIAGLF  
NLFQTGIGNYTPSGANYELMAVA AVVIGGASLTGGKGRIMGTAVGVVLVLA VLENGLQIAG  
ISAFYRYIGVGVLLTIAVIIDRAFPDMF\*

>SPBDM4\_v1\_50590|ID:27158953| putative Ribose transport system permease protein RbsC [Uncultured spirochete bdmA 4]

MHADS VNKTSSLQERLGRNWIAIFIVLLVVLFSVSARAFFSVDTAQLIFFNGTEVFLLA  
AELFVIITGGIDLSVGFVMGFSTVSSKLIVMFAGMGLSPLASILAGSIVMMIIGLLPGL  
VNGWLVA YLRVPAFIATFSMLGVTHGISELMTQGIPTKNLPSLAGIIGNGSFLYIAPNGA  
LSFFARPQVARGQTVIAILPNMVVFAFDLILFAFILGKMKFGRHLYAIGGNIDAAIRSG  
INVKRDLIKAYVISSFFATLAGLSYVMKYITGKPDAGANMLLEAIAAVVIGGASMAGGSG  
TVGRTILGALVIAIETGLRIIGMQTFMTYILVGAILILAVIIDQVFPNRNR\*

>SPBDM4\_v1\_50591|ID:27158954| ABC transporter [Uncultured spirochete bdmA 4]

MAHLLEAKNITKRFGLTA VDDVSFYVDEGEVVA FVGDNGAGKSTLIKISGVHKPDIGE  
IFLDGEKIHIGSPIDAINYGIETIYQDLALAENMDVPSNIFLGRESTKKIFGVVPVNHE  
HMMRESHKVLDRLDIDIPSLKSNIRNLSSGGQRQAV AISRSIYWKARVLMDEPTAALGIA  
EQKKVLELVSSLRKQGIAMIIISHQMYDVFSVADRIIVMRRGIKAGERLVKNTTSEEIVS  
LIVGAESVEKRSQ\*

>SPBDM4\_v1\_50592|ID:27158955| putative Histidine kinase [Uncultured spirochete bdmA 4]

MRFFARTFNSFISVIVLQAILVILLVSGSVARSQQEDSKEELKVEALNIYDNFNSWKRVL  
WGSIVDLGKSGQLKSMIASQRHITLDDALES AVKKAATQAGCEFLIMKNSWSAFTVVRPL  
TEKPVPAKPKQDFSIDRPHYVEMLLSDGILYFTGAVRVTADNGRYLDIFI AKRVDEVLM  
RQLSFNRIKALVSLNSHFAVGSIAGTAFSEWMRGKTFNTSYTVVDELNEDNVPYSVVIQ  
QSGNARLAEGGQNTATLYVCTFLSLTDYRARNVFNRSILLVSLFVVLFTILLSAGMSK  
AVTDPVRQLRNAMIRLKS GDKPKVMGPKTGEIADLFHGFNDMSARIEEDKRALSSHIQE  
ITRIKEYNDKIFNSIQEKILVINA VFAVEQANRAFLEYCGQTEKMLVGRNIDELSPALFD  
EPVHASIRAIISGGKAFDQTIRRASSGLSFEIKFYPLLEHDTASTSIHCIMVIEDVTARV

AYEEKIRQAEKLASISMLSAGVAHEINNPLSSILSNVQNLIKAEKEPERLEDLRLVEQET  
KRIARIVRNLEFSSSSPVEKPRNDINACIQKTLQLVDYSLKKESGVSIVVRLSPDLPSA  
AIGEDECKQIILNLIKNSLEALGSSGTIRIETAFLSSESMVQCRVSDTGRGIPKALLPRI  
FDPFFSTKNEEGNSGLGLSVVYGLVSKFKGRIEVESEEGRGTMVRISLPVARPGT\*  
>SPBDM4\_v1\_50593|ID:27158956| Two component, sigma54 specific, transcriptional regulator, Fis family  
[Uncultured spirochete bdmA 4]

MKTATILIVDDEEGIRHGLSRFFEREGYAVESAEDAVHAETIFESRKIDIAILDRLKGP  
VSGLDLVLRLKRESDLPVHIITGYGSIESAIGAMKHGALDYILKPDNEALLVLVRRNL  
EVAQLRRDNRYLKKELYQKEYQRQIITKTPAILDIIARLDSVKDSPAFLVMGESGAGKE  
VFARYIHFTGNRSAGPFVSNCAALSEDLLSELFGHEKGAFAGAIERTKTKFELAHGGT  
LFLDEIGDMSPAIAKLLRVLEENSFERVGGTKRISVDIRIVAATNHDHELLRTEKFRS  
DLYYRIATVEINLPLRQRAQDIPYLAEFFINLYAERYHKRIDGISPAVMQRWLSYEWPG  
NIRELQNVIHQAVLLCTGNRIEIDTVLAGCGSGEGQRAPENSFREARTATESSVRATQSE  
VAPDQGVPHAPGDPVRSASFQPGRYTSLKEVAEAAAIFYERQRIESEFVLAAGNKSQTA  
RALGITRKTLMKMRKYSMLMQSGPKEGTAPPSAYEPKVIARPRKGAEPGGSTC\*

>SPBDM4\_v1\_50594|ID:27158957| PfkB domain protein [Uncultured spirochete bdmA 4]  
MLTISGTGCALMDYLHADIRLDSEAFRLYRARRGGDGGLEPGKLVFVEDLERFAGEPFSR  
ILEALRGGQEPDRANLGGPSIVSLIHAQAQMLEGHQAQVQFFGARGVDASSDAIMHIVSRT  
PLEVSGYLAFAGHTPFTQVFSPTDHYDGHGERTFVNERGVADLFAPGHLPERFFDAEIVA  
FGGTALVPQIHDNLDLCCRRAHQGSIVVNTAYDFQSEVRRTAADRALAGSYEENGARW  
PLGARDGAYRHIDVLVADREEALKLSGADNVGAALAFFRSRGTSAAIVTDGARDIHFYS  
DGRFLAPQEEKILPVSAEVRRALGSPSRPKGDTTGCNDNFVGGLLASLALQLEAGQKRGAF  
DIIDACSMIAIVSGGFSCFYLGTYLEEMSGEKRRKIETLYGLYLQQLSAGS\*

>SPBDM4\_v1\_50595|ID:27158958| Mannitol-1-phosphate 5-dehydrogenase [Uncultured spirochete bdmA 4]  
MQTLVQFGAGNIGRSFIGQLFARNGYEVVFDVVSAPLVEALNERREYRIVIKRNGVSDEE  
LVVQNVRADGREHASVADAVAGADYVATSVGLGALPDIIPVLRGIELRALRSPNRLD  
IIAENIHDGAQYFKESLGRHLPQGLPLADHVGLVETSIGKMPVPLMRKEDLAADPLLLFA  
EEYNELIVDKHGFGRPLPQIPTLNPVENIRAYVDRKLFIHNLGHAATAYFGFSQSPDSRF  
IWQALELPGVAVRVSAMGESAAALALEYPHDLKPGALTAHIDDLLVRFANRALGDTVYR  
VGRDLYRKLAHDDRLIGAALLAARHGLPCDTIADAIRAAVGFRAADEEGKLYPRDADFA  
REVPKGLEGILRDVSGLAMEDPVERGVAVRILSSRQ\*

>SPBDM4\_v1\_50596|ID:27158959| MATE efflux family protein [Uncultured spirochete bdmA 4]  
MNLMLFLHQSTEQRDFILNGPTSRTLMLAAPTMLGIVQALMPLMDGLFINNIAGTLVA  
SSVTFSEPVINMAMALAQGLSVAAMAIIQGMNNGRGNFEESRRTSTQIVVMGSILGCFSAP  
LLILAAAISSRVNPQISHNVFLYLSLYALVLPFSFLESYNGIKNANGVPEAPFIRMIL  
MFVLKVFNFVFIYVLRMGIVGCVLASLAANILITVWMFWELFIQKGS DRLELRGFKFDP  
AAARQLFHIGAPAMANTFILNLGFFLINTEVEKYGPVVLNGQGIANNITQVAFILPGAFS  
SAVTTMVSMNIGAENPEKAKSSLVQGTILSAITAAIIIVIVPLSPHLTILFTRRADVLE  
IANRALHIYTFVVGFGITITIQGAFIGLTKVPLVLGILRIWFLRYLFILATEKYLQY  
YAVFWGNLFSNYAAALIAIFLISRTKWESVIPGSEKNKVVIV\*

>SPBDM4\_v1\_50597|ID:27158960| conserved protein of unknown function [Uncultured spirochete bdmA 4]  
MEESDNIIIKRS LAEQVYMYLCNSISNGKLYGDTINTKRLAEELHISMMPVREALKRL  
EMDGIVEIKPRSVCLLRTPTKEAIMDAIAAREMLEIYSVRSMYASIDVARLDVLEIIDK  
MKA AIAEDPINLRKYIKYDWQFHKELCNLSGNQFISKFYKELNIRLNMDYMYDIGIKPNV  
SQTFKDHIDLVEALAAHSPTAVEIIEKHLRISRQNILNGRFFSVQDAAG\*

>SPBDM4\_v1\_50598|ID:27158961|fabG| 3-oxoacyl-[acyl-carrier-protein] reductase FabG [Uncultured spirochete bdmA 4]

MELQEKTAITGSAKIGFEIARTFARQGACVVLVDRSGAEKAAESLKNQHYDAIPVSLD  
ITDMKAVNNAVEAVANAKGHIDILVNNAGIARGDILDLSREQWLQVMDVNVNGNFYFCK  
AVVPYMRQHSGSIINITSIAGKMGDITAAPVYGTSGKGAINTLTKSLARQLAEYGIRVNA  
VAPHAIEDMSADWTNDKRQEVIEAIPLKRMGKPEEVAEALFLASERSFITGEILNVN  
GGQLMD\*

>SPBDM4\_v1\_50599|ID:27158962| Transporter [Uncultured spirochete bdmA 4]  
MLLVGILFLFLAIGMPIAYAIGISGVAFFLQHPPELPLTMIAQLPISQTQNFTLLAVPLF



ILAGNLMNASGITNRLVKLASVLTGHMRGGLAQVNVVLSLTMGGVSGSAIADASMEARIL  
APSMIKQGYSRGFSANCTAWTALITATIPPGVGIIILYGTTEVSIGRLFAAGIFTGIFLM  
AVYMFTVWIIATRRGYKPERTKASFRERMAAIKENVWALLFPVLLLVLGRSGIFTPSEVG  
SFACVYAVLVGVFAYKELTFKNLVQTLASSVLDVGAIMFIIALSGIFGYGIPFERIPDLL  
SGVILGLSTNKIIVMFIIFILVILGMFIDGSVILLFTPIFLPLAVKVGWDPVHFGILF  
CTVITMGNMTPPVGLAMNAVCTVLDVPISEYAKEMWPWLLATLLAVGVLVFFPGLVLALP  
RLLF\*

>SPBDM4\_v1\_50600|ID:27158963| Tripartite ATP-independent periplasmic transporter DctQ component [Uncultured spirochete bdmA 4]

MKKLYHFVCKAEVFLAATCFVVSICALIFVAAIARTVRHPINWSQDMSLFLFAWSVFLSAD  
AALRADKLVNIDLLVTHLPLKARTVLNTIYIIIFVFLVLLFYNGIKLSLFSRRRVFQGI  
PGFSYSWVMLSIPVGSLLQMITVILKIKNLVYVRNEN\*

>SPBDM4\_v1\_50601|ID:27158964| TRAP dicarboxylate transporter-DctP subunit [Uncultured spirochete bdmA 4]

VKRKFMFFVFFLIAGILLVSAQTEKKYVLKFNHVLTTQDPYHEAFLKWAEAVSARTNGN  
LKIEVFPSAQLGVEEDILEQIRQGANVGQNTDAARLGQYVPAIAPVMNGPYFVDSLEEVK  
LNTLPSVAAWKAELERTQGFKVLSFMWVQGFQMITNKPVRKPSDLAQLRIRTPPAPIWQ  
ESIRAIGATPVAMAYGDMYSLQTKAIDGVELSFTATASGKFQEVTKYACETKHILLINF  
EVSSEKWFNSLPVEYQKILEEECNKAGLEVSRRYLNEIDPKNLNLVKAAGMTIPESEID  
MAAFKAAGEKAYQKLNLLAVRDQVYKELGKTK\*

>SPBDM4\_v1\_50602|ID:27158965| putative glucose-6-phosphate 1-epimerase [Uncultured spirochete bdmA 4]

MHGIHEYLHSLKPECVNVEEGAGGLPLLHVRNRYAECIYAYGAHVVSFKPHGERDLLWL  
SPYSRFSEGAPIRGGIPLCFPWFGKHRTRDDLPLHGFVTRFRWNLESAEVLVDGRTKIVF  
FVENRGPTSEARPYRFRLELSTIVGETLEMALTVQNLHLPIICEEGFHTYFKVEDPRRC  
EVIGLDGIEYIDRVQGDSRATQRGAGYFEGETVRAFMHVPPVLELLDLGHRRIHIEQVHM  
NSAVLWNPGEKAAAENPEIRETWKQFVCVESANCLDCQLEIPALGYHRSVLRLSAVNFDE  
QKQGQECCKGALG\*

>SPBDM4\_v1\_50603|ID:27158966|mdh| Malate dehydrogenase [Uncultured spirochete bdmA 4]

MSHKIRIERMKLEQFCAAVFMKLGSLPDEAQDSAEILVAADARGIESHGVGRLWRYKNGL  
QRGIMAGSACATELRKTPSLVLDANGAMGLSLSKRTMMRIIEKAKIGGAFFSSVRNSNH  
FGIAGYYTEMAARNDMIGICMTNTAALGVPTFGRKAMFGTNPFIASFIPAHDRMFTLDMA  
TTVVTRGKIEVDREQKPLPGGWA VNTKGVGTSDAHSLEDMLYQRGBGILPLGGEGELF  
SGYKGYGLAEVVDIMTAILSGGVFGQAVMDSKATSARVCHFFGAIKLDLFRNPEEIKSDM  
DRLLSELENAEPAEGCERVYYAGLKEHEAEAESARIGVPLSEKVAAQLRQIGEELGVAVP  
FTF\*

>SPBDM4\_v1\_50604|ID:27158967| Pyridine nucleotide-disulfide oxidoreductase [Uncultured spirochete bdmA 4]

MRIVIINGNIAATSAAVSIREYDMENGITMLSDEHAPFYSRPRLTEYLAGKVAFEKIVIR  
DETWYAKNNIELMQGVRVESVDPGHRAVTGSFGLLNDRLLIASGASAAALPSFYNSHLEH  
VFTLRTKEDADRIA AVAARSRTAVIIGGGLLGIETAYALAERGLEPTVIEVFDRLPRQL  
DAESANMLQDMLAQKGLHFLLAQQTASLSNEYGMVKISFKDDSALSADMAVISAGIRPNI  
SFLKNSQVEVGHGIIVDTRLRTNIPDIYAAGDCAEFKGGKIYGIWPAAKEEGEIGKVIAG  
QEASYHGSLMSAKLKVASIDMASVGDITIGSQTRAESRRDGSSFRKLFYENEKLGKAILI  
GDTTDYFKLQREIAQSAG\*

>SPBDM4\_v1\_50605|ID:27158968| putative peroxiredoxin [Uncultured spirochete bdmA 4]

MDEKRFSMPLLGDDFPEMELVTTQGVKLPQDLKGSWFLFSPADFTPCTSEFVSFEQ  
HAKEFEDLVKLGMSVDQVFSHIKWVEWIKDKLGVNISFPVAAANDSIAEKLGLLHPGK  
GTNTVRAVFIVDPKGVRLIVYYPQEIGNISEFVRAAKALQISDTGVAVPADWPNNSLI  
KDRVIIPPKTVKEAEERLKKYEGFDWWFCHRPLENN\*

>SPBDM4\_v1\_50606|ID:27158969| Transcriptional regulator, NifA subfamily, Fis Family [Uncultured spirochete bdmA 4]

VSTNISVMDSAMLELILQSIQKLDIYELAVILRYDGGQQLSVTKAAGPLADATLTGHTI  
SLKNRDLAAILEGRKPYLSESEDHIDTYADIINLPLHHSCLVSPLILGDEIVGLLTFD  
HRKCNRFNPQIIGFIEMISTLVAALLVQFDVSNELIERTAQLLNERNNLLASESDAFRNL  
IGSSPQWIRVLDSIRLVAAAEAPVLIMGETGTGKEEVARAIHRLSSRAERPFVAVNCSAL  
STSLAESELFHGHEKGSFTGALALRKGRFELADKGTFLDEVDLPMELQPKLLRVLSDMI

FERVGGKEKPVKVDVRIIAATNVDLAKAMQDGHFREDLYYRLSVFPIALPSLRERTSDIEL  
LALHFLHSIKERTKNSGLHFTEQAFHAILVYSWPGNVRELKNVLERAAILAGSGEIREEH  
LGLRLHSLTRHDAAGFSAKSAAVTEKQAVYAGSADVDDGALPLQSIKKRIEEALEASGG  
RIYGKDGAAAALNLKPSTLQSKLKKLGIRREWFLSPRGEH\*

>SPBDM4\_v1\_50607|ID:27158970| putative Membrane-bound serine protease (ClpP class) [Uncultured spirochete bdmA 4]

MARGNKFHGKENEPEGLMCTVYYAFLFCMLFASLGASGAQPRDIEFGGIPWGLRQTAGPV  
DPGPNTFSNAPDQVWVDAQGRAHLTLQKRGDVWVASEMMAKRDAGYGTYRFTVSGALNEL  
DPNIVFGFFTWDKSPEAFNREIDIEISRWGDAGGPNGWFTVQPYDVPGNQHSFFLPGADA  
YTFEMRWEKDAVEYALFCGGNVCERWRYSGTVPEPGRARLRINLWLFHGRVPLGPGPYEV  
IVSDFSYSK\*

>SPBDM4\_v1\_50608|ID:27158971| Dihydrodipicolinate synthetase [Uncultured spirochete bdmA 4]

MTDRSSLIATFFPGGIPTLWCPPLTHFKPDGTIDKARIHAHLRFMRPYVPALLVPGSTSE  
GWELSQQEEAHLVDIALDCAREMDFILVGILRPAVGVAKADIEVTVARLFGDAHPDPAG  
FHERQLCGFAVTAPKKGKELSQRARIYQELDAVLELGYPTAFYQLPQITENEIAPETVADLA  
SRYENLYLLKDTSGGDKVVTSGLDFFGGVFFVRGAEGNYAEWYKKAGGLYDGFLSSANCF  
PRELREVLDLLEQRRTAEADALSARVSNVVLRTLEAAGALPFGNAFTNAAKAIDHFIWAG  
PDADISAKIYVKSATLPQSLEAREALDREGLMPHEGYL\*

>SPBDM4\_v1\_50609|ID:27158972|aroQ| 3-dehydroquinate dehydratase [Uncultured spirochete bdmA 4]

MTRLRIA VIHGPNLNMLGTREKDIYGTKRLQDIDEEILREAEKQGFVTFQSNSEGLI  
DYIHGCMGKIDGIVLNAGAYTHYSIAIRDAIAAVNIPTVEVHLSNIYKREEFRHSSVIAP  
VCVQGQISFGAYSILGLHAILNVYATS\*

>SPBDM4\_v1\_50610|ID:27158973| exported protein of unknown function [Uncultured spirochete bdmA 4]

MKTKKLIIAAIIISLFLGSAFADGADPKTVTPAWVTEKQLTQQAQAEQAEAEAPKPKNF  
NVFFIGYDYPTLSGPLASHLTGWNSPVNFSLGISSNTSGSSFLSGLELEFFITNDQGM  
RLQMNDMVMAGYSFNIKPVRFVNGARLGLSLLDVTDDDPANPTYMALGGIIGPEASLYAE  
LAPDFWLWARGRYSMAYYFTIDSSGGANPIDSGDNTLNCVSLEAGLAFRM\*

>SPBDM4\_v1\_50611|ID:27158974| exported protein of unknown function [Uncultured spirochete bdmA 4]

VKYAKLALALFVAFFVAGCASAPPPTTSTTSPPGAAPQASAPPQGSAPPSIAPPKNDTWP  
KIYTDETYLTSTFDSSWSEAEAVGAIKLNQNSFVEFNAGIPLSELDVDSYGLRAKWQWVEN  
NSFIKSASFIPFDQVTSILLEYYPALNKDYKWGLIVNLSGSSAVSVRTPSRDTAERLGK  
AILVLAKARSAKLSIPNLRFGAALSALSDAQAQAAGILKTSGVIVLWVFRESPAEKAGFS  
PQDIITGVGGKPVHSTEELFAAIDAAADAGAKELKIDGIRRSYRIEDKKYVEIFVPLTYT  
LAIDQAGGTK\*

>SPBDM4\_v1\_50612|ID:27158975| conserved protein of unknown function [Uncultured spirochete bdmA 4]

MNEESTEQLALRGASPGHASPRRRPAWYSGLKRRARKLKRQIWALSLALKDPRTPWTARI  
IIGFTVVYAVSPIDLIPDFIPILGQLDDLVLPLGLIALALRLIPRDVMARCRREAWRHLE  
AGDRVKTAAATAASIIFVLIWVLLILWIVLRIV\*

>SPBDM4\_v1\_50613|ID:27158976| Major facilitator superfamily MFS\_1 [Uncultured spirochete bdmA 4]

MEDRKKAAAYKFLVLMGIVSLFSDLYEGARSILGPYLLLLGASASTVGFVSGLGEFIGYA  
LRLVTGYISDKTKRYWPITIIGYAINLIAIPALALAPGLGWVYACGLIVLERFGKAIRSP  
AKTTLASFAASEVGAGKGFALQEVLDQIGAFIGPLMLFIVLTVKGNNDKLSAYALGFAIL  
AIPAAVTLILLVARNKYPRPHEFETTPAPVTGDGLRSAYWYYLVGIGFLALGFADFPLM  
AFHMTKTKLFPDNVVPVLYSVAMGVDALSALFFGRMYDRKGMTAIISSAISMLFAPLVF  
LFRAPALAVAGVVFVWGIGMGAQESILKSAVTTIVSKERRGTAFGIFNAGFGAFWVFGSWI  
MGLLYDRSLPLL VIFS VVSQV ASLPFFFKTRSLMRHAFEDVKVSG\*

>SPBDM4\_v1\_50614|ID:27158977| ChrB domain-containing protein [Uncultured spirochete bdmA 4]

MQLVLHSSYEYTYSMEDHSTWLLFAYQVPASPSTHRSYVWRKLLKALGALYLQNSICILPS  
IEPVEETLRLQLHAEIINRNGAAIILHVNLNNEEERTEIARFRRQMEDEYGEFIEECGEF  
HAELTKERARHQLTYGELEENDVDLGLRLWLPKLRVRDFFQVDTATKAAEALESCEADF  
SQFESEVEEASRG\*

>SPBDM4\_v1\_50615|ID:27158978| Alkylhydroperoxidase AhpD family protein (fragment) [Uncultured spirochete bdmA 4]

MLAVTEVNGCEICSYVHTRIALEKGLSDEEIQMILGGNSEKIPEQEVVAILFAQHYADTR

GKPTQKTWNTLVATYGEQKSYHILGIIRMMVGNIFGIPLSALKNRIKGGKPNKKSNI GYE  
LIMMVLPIPFIPITLLHALVSELLRIPSITFSE\*

>SPBDM4\_v1\_50616|ID:27158979| putative transcriptional regulator [Uncultured spirochete bdmA 4]  
MSQTERIFYIDRTIRDHGGITALQICRKFVVCERQAKRDIEYMRNRLDAPIIWTPGRMRY  
EYSEPWDGLRFADETSFLAFAFLRAILGRYSYVPVSEEITALLREKIAGRYAAISDKVR  
YELPDMETIDGETAYTMCQALLEAGTLDISYTDSKGEQSERTIAPLRLINYAGKWYCVAF  
DSKSMELRTFAVSRMQNLRPADTPHFPIPADDEVERYISSSYGIFKGEVLGTATLRFYGG  
AARAVRTQQWHRDQKISAVPRAADSDAIDLSPVHDWTELLGRALRCGANCEVVGPEFR  
ARWREEIERMKTLTDKSTL\*

>SPBDM4\_v1\_50617|ID:27158980| protein of unknown function [Uncultured spirochete bdmA 4]  
MSAKAIYLIQFEKDYVELFSESQSGAFDFAGVVSGDGAAAKARARAKDFIEEAPETELYF  
QNHFGKPPVYEASASHTVRRMGLPGAPEESVLAFLYRYPAFRQAELRGDFIGAGTAVGR  
SGKLSHRPLRLRYLAERDLFLIFALYWLWAFDADKTARLVELFDGKITDGAGDIWAELYD  
FAVPGIDARDLPAFRAEVKAKLSEYLFDRGGRLVLPLVGDNFGGAVVEMRRRSVTALAE  
RRRALVEGLSGTEDRVRAWLESIRFTLQPEPWNKARDAMSVLATFPEDGRTDLAGYLRR  
DIAAYLTPLAREGRNFEARLFLCDEDSLELSIRAARPPD\*

>SPBDM4\_v1\_50618|ID:27158981| putative prophage exported protein [Uncultured spirochete bdmA 4]  
MKKIKEFPKSLFTVLMFVFAILSVYPQTPNQYHDLVAALQRAAAEKDDTQRLALYDALV  
RDFGIAEAPAATALTPQEPSKWVFDQRADPLTDKQRYFFILTADSGANEYGDKPTLIVR  
SDGEDLELYINWKTYLGNDDYKYEGKYITTRVDSQPTTSLWDNSTDSKASFCPWNDV  
PDLVRRMGEGTKFVARCTPYDANPITAVFDIRGLKAVSMPYNEALGWVK\*

>SPBDM4\_v1\_50619|ID:27158982| CRISPR-associated protein Cas5 [Uncultured spirochete bdmA 4]  
MSTYNKSYKVNFEIAGPAAMFTRPDTGAAPVSYVPPTYSAAKGMFESIARLNSAYIRPTE  
VEVCSPIKFQRYTTNYGGPLRKDNQMKGDTSYQLIATILIDVCFRIYGEVEELYKPLDVK  
TNHLHHLQEMFQWRLERGGKCYMPCLGWKEFTPSYFGPFREETKVDESIQITIPSMFLSV  
FNNEGKYNPVFKQNVETIAGRLKYAE\*

>SPBDM4\_v1\_50620|ID:27158983| protein of unknown function [Uncultured spirochete bdmA 4]  
MLNEGYTLYKSLERCISLMPHHPDLKKPGRKEGLIVGLDTRGQVANIEYRGSDKMAELW  
TTSEGNHNSFPVLKLQHPLWRVDPNDAVRERIKELKKDEIKRQFLMQQYYDINITSTDI  
NWWARVHGRVDEMSEHFFHTTEREYVALYNLMGRFLEANDLKRFLQELLNQLKKHDEIPYS  
FIENILIGNKWDKKHEFRSEVPLVMDLDCWGNYPTRIASQKLESFVSECLFKMQKPSQT  
NGISALSGRIIEIEDKKFPNPTLPIIGQTYLFSVNDQTPCQTRYKKTSTSIFPAGRNEAN  
VIQESLRWITSEERRGKTWYPVPGIKDSETDLLIVYLIDKPNTNLNKAARLLGGVSSTDLN  
ESTFEEIAAPIIDA YRGQHILKASDKIRFFVLRQADPGRKQVVVNGDFTASDVVKA AEVW  
QQAGGNVPPFALLFPGAKDENAKILTPRCFPADLVRLTQKQWVRLGEDYSNKVPGIALG  
KVYDIFFDQGGKNKAAVYALLRIVLRRTEPLLIGLVGAMHKNTLEKFTPESRFTLLLAI  
VISICLYKLGISKEKYMSDTFFFVGRFLSLTDTLHMEYCKNIRNGNIPPQLLGN AHLNLA  
LKNPAAAFALLSQRIGVYQAWTRKEQGEKVKLARWAVGEMGEIALSLANEGLPTTTDDAA  
KAQILLGYLAKSGKKESIGTDTDSVK\*

>SPBDM4\_v1\_50621|ID:27158984| conserved protein of unknown function [Uncultured spirochete bdmA 4]  
MTATANDMIK RATGLLVIEVINSNPNGDPDRES DPRIRDHDQRGEISPV SFKRKCRDLVE  
RKDG PVWQTISNELDL SAEKYMISESRET KLKDIRDL DENKFTERFWDGRVFGNTELEK  
RDIPVKTGVVQFGLGVSISPILVERLTTNPSVQEDKSRGMAPLAYRIVQHGVYCMPPFFV  
NPSAVRKTGCTKLDIDL LRIIPYTYHTAS YIRPQVFIRHAWYIEHKSPLGSCSDFDLI  
TALTPIRKSELEQPSASWADYEVVVKLPDDLQIKVEPLIDLMNSI\*

>SPBDM4\_v1\_50622|ID:27158985| Helicase-like protein [Uncultured spirochete bdmA 4]  
MNTKWL AHSVGKKPSVPAQSYSEHIADVGRVDHNL DHLLKYNGDVNFFRTTVRTAALY  
HDLGKLDDENQKVLSQGGSRHLPTNHVDSGTAYLLDKDFV ESSLVYSHHIGLPSIPAEQ  
AKEGLFLRDP ELKNITEENLSKYLLRHIESGFDDLVEIQDKQSDWNGLSRRIALSCLVDG  
DYGDTAKNYGKEFPVSCPKPRWTERL KALDRYVEGLAKDLNVAPERILLRQKLYQASREA  
DTTPSFFACDSPVGTGKTMAVMVHLLRTAIDKNLRHII VLPYTNIKQSVEDYRQALVL  
PDENPDEVIAEHHHQVDFDEVEVRQLSTLWQAPIIVTTAVQFFETIANNHPSRLRKLHEL  
PGSAVFIDESHAAIPNYLWPQTWTWLN DLGEEKWHCYFVLASGSLPRFWELKDLITVPERL  
PQLICDDL RKEAVRQERERVVPTRHSDILNVDGLIKLVLSQAGPRLVIMNTVQSA AVIAH

RLASQIYGENYSIDLETSQVLHLSTALAPIHRDKIVDIVKQRLSLARENYDTNFTLIATS  
CVEAGVNLSFRSAFRERAGAANLLQVGGRRRHGENFKPILIDFRIEDDLISHHPTFDIS  
SQVLERLFDEGRVANDSPSDLVTEALRRELMSDTNVQYKRLQKYEEAGDYPAVTDLYRVI  
SGDTKLILVDQEIINKLHEGEKIDPKELVRRSVQMWTSKIGKTCAYQIDGFPDLFGWPED  
GYDEFFLGYMKGVLPILQLEEKGFGII\*

>SPBDM4\_v1\_50623|ID:27158986| protein of unknown function [Uncultured spirochete bdmA 4]  
MRSDYRPRALDLGPTLEQMSVFLFGPRQTGKSSFVREKLKPEPTLSYNLLDGGRLRLLA  
DLTLMRQEMETCDIPAFARFLQTI\*

>SPBDM4\_v1\_50624|ID:27158987| CRISPR-associated protein Cas4 [Uncultured spirochete bdmA 4]  
LYSEDDLVPISALQHILFCERQYALIHIEQVWEENRFTAEGKVLHERVDVEHHESRRLFR  
QEYGM AVRSLERGLIGKCDLVELYLAPNGGVADAVPVEFKRGRNKEEDVDRVQLCAQAF  
LEEMFKVPVAVGQLYYLQEHRTTVDIDGPLRAKTLQLVERIQQLQSAGTTPPAVYEK  
CDRCSLLELCMPESAGSGGKRVDRFVQSQIRATREECGQ\*

>SPBDM4\_v1\_50625|ID:27158988|cas1| CRISPR-associated endonuclease Cas1 1 [Uncultured spirochete bdmA 4]  
VRKLLNTLYVSSQGSYIHKEGETIVVEREQKLLQLPVHTIGGIVCFGNVLCSPFLGFC  
AEHDIAISFLTEYGNFLASVRGPVSGNVLLRRGQYRMADDAEITRKIAANIVAGKLANSR  
LVMSRAVRDHGEKIDAASIKSASASIDRLMNELPHAVSDGVRGIEGMAAAEYFSVFNHF  
IVDQKEDFVFNDRNRPPDPVNALLSFVYTLLSHDLRSAIETVGLDPAVGFLHRDRPGR  
PGLALDLMEEFRPVIADRLVLSLINRRQVSPQGFKAENGAVMMDDATRKTVLVEYQNRK  
QDEIYHPYIEEKIPVGLLYFVQANLMARFIRGDIDGYPPFFWR\*

>SPBDM4\_v1\_50626|ID:27158989|cas| CRISPR-associated endonuclease Cas2 [Uncultured spirochete bdmA 4]  
MFVLVSYDVAITSPGGKRRRLRRVAKTCLNFGQRVQFSVFECVVEPAQWVTLKSQLETIID  
MEHDSLRYYYLGSNWKRKVEHVGAKPTLDVDDPLIV\*

>SPBDM4\_v1\_50627|ID:27158990| protein of unknown function [Uncultured spirochete bdmA 4]  
MYISNYHKNKYQGNSAILSGPDSKIYGFPFPMFSKIDLIKNYVLRDSTGVFCVIYVRTS  
IWPGPQFPATGTSKRRGLIFR\*

>SPBDM4\_v1\_50628|ID:27158991| conserved protein of unknown function [Uncultured spirochete bdmA 4]  
MNVAPPAGAWIETTEKWTVVAVADVAPPAGAWIETRYCRNIQNIHHVAPPAGAWIET\*

>SPBDM4\_v1\_50629|ID:27158992| conserved protein of unknown function [Uncultured spirochete bdmA 4]  
MNGMWVRSWDASVAPPAGAWIETMSVILIRKHGLVAPPAGAWIETTDATEWEIADIKSRP  
PRARGLKPVMDGTYDSSRAPRGRVD\*

>SPBDM4\_v1\_50630|ID:27158993| protein of unknown function [Uncultured spirochete bdmA 4]  
LKRLDKLKADIQSISRPPRARGLKQSVHTAYDQMGAVAPPAGAWIETEAERRTAGVAQVA  
PPAGAWIETMKPSYSSWCF\*

>SPBDM4\_v1\_50631|ID:27158994| protein of unknown function [Uncultured spirochete bdmA 4]  
MLVAPPAGAWIETDTRQEKVRILTSRPPRARGLKLVNSADTWQLERSRPPRARGLKQSG  
TLTEERGIKVAPPAGAWIETSILPEGFRRCPSRAPRGRVD\*

>SPBDM4\_v1\_50632|ID:27158995| protein of unknown function [Uncultured spirochete bdmA 4]  
LKRRTRRSGRSRISVAPPAGAWIETTDATEWEIADIVAPPAGAWIETAMESLYSAQAAGR  
APRGRVD\*

>SPBDM4\_v1\_50633|ID:27158996| conserved protein of unknown function [Uncultured spirochete bdmA 4]  
MVSIIHAPAWGATSLYRDFCFIKGFNPRARVGRDSIKRSCNKQFFRFNPRARVGRFRLS  
ILDSFNPRARVGRDVISARAMPA\*

>SPBDM4\_v1\_50634|ID:27158997| protein of unknown function [Uncultured spirochete bdmA 4]  
VIVPKHQREFKSFDDNILSMYARGMTTREIAGHLKEIYGTDVSPELISRATDSVKGLLED  
WRNRTFYPIFLDALVINVRENGKVVKKSTYMALAINQEGRKEPLGLWIDQAEGAKFWLK  
ILNELHNQGLQECWLPSTASQDFQTPLPRCSRRLKCNCVLSTWSTIP\*

>SPBDM4\_v1\_50635|ID:27158998|blc| outer membrane lipoprotein (lipocalin) [Uncultured spirochete bdmA 4]  
MKRTLGFVMTLIIGMAFFSSCATIPNGANVVDHFEKEKYLKGYEIAARFDFSF EKLNNT  
TAEYSIRKDGKIDVKNRGYNYVTKKWQEANGKARFRGDDTLAALEVSFFGPFYAAYNVIA  
LDKDYQYALIAGSNLNYLWILSRKTIPDEVRNEYLMIAKSAGYDVSKLIWVEHDK\*

>SPBDM4\_v1\_50636|ID:27158999| protein of unknown function [Uncultured spirochete bdmA 4]  
LKEQPFIAAFVYGFNETGTNAKPISKVTDF\*

>SPBDM4\_v1\_50637|ID:27159000| Radical SAM domain protein [Uncultured spirochete bdmA 4]

MSLKARIAKSIVMSKIKYIREDPDTRLPEILDSARKIDRTGRFDSAFDTLEPIAKDRNNN  
WNRMVRSLLAETDPVCLEKLIGNLAINTELSSLHIRERAMKKYGCNIPWAILMDPTAACN  
LHCIGCWASEYQKTANMDFDLDRIITEGKKLGIYMYIYSGGEPLVRKADLFRLAQKHSD  
CYFLAFSNATMVDEAFAEESARVGNFALAISIEGFEEETDMRRGKGTAKVIAAMDILKA  
RGIPFGFSACYHRYNTDVVGSSEFVDFMVEK GARFGWYFTYMPLGRDAKTDLLATPDQRE  
YMYRKVREYRETKPIFVLDFWNDGEYVKGCIAGGKSYLHINAAGDVEPCAFIHYSNANH  
NMSLIDTLRQPLFREYAAGQPFNENHVRPCPLLDNPEKLRGMVERSGAHSTQLLDEEDVV  
SLTAKCEDAANNWSARADTLWKERNEEKARQEAERAARNAARQGAKNKKTEEEIYQP\*  
>SPBDM4\_v1\_50638|ID:27159001| conserved protein of unknown function [Uncultured spirochete bdmA 4]  
MKVNDVAVGKWLGWIGIVLGVIGFFWASIWGMGIGAVLGLVGFSSQKVLNGVAMGAGVIA  
LIIGLV\*

>SPBDM4\_v1\_50639|ID:27159002| protein of unknown function [Uncultured spirochete bdmA 4]  
LYGFEGCTLAGFSLIDIHPELLNQYYKLG MIDYYLVLEVTKDASADEIKSHYRRLAMQWH  
PDRNKGSKQAEHFKAISEAYSVLSDPASKAA YDESLRMGTDYRAGQQQGRPEESGAYGP  
FGFGFGFADGFGSSSGQERAGAFEWASGLSKERASNMFMDEMYNLAIELTMQNIPWRDIA  
QELIKRGCPESTAREIAKKIETQRKAMVRNRAKPYFIRSALSGALGLGMFATFGGFGILG  
FIGLIMSLNGGYNLIRAIYFLTGTG VAPKGGVM\*

>SPBDM4\_v1\_50640|ID:27159003| putative 5'(3')-deoxyribonucleotidase [Uncultured spirochete bdmA 4]  
MDESSFIFGVLDLGVVDFY G AMRTIAAEWLDRPIESLTPEVSFGLSEWGLDEYGGYEKL  
HRFAVTQRGLFRNMEPVRDAPATLRKLSVRGVRIRIITHRLFLKYFHREAIAQTIEWLDA  
HDIPYWDLCFMKDKGAVGAHVYIDDSPENVESLRAQGCHTIVFSNSTNRAIPKPR AETWK  
DVERLVLEAYEEWRTGTLGLFGASGYDPG SVRG\*

>SPBDM4\_v1\_50641|ID:27159004| protein of unknown function [Uncultured spirochete bdmA 4]  
LTESGNFIVNSSKRFDLMEAKHEEEKNCIDDGAPSFGGSPGIAVGAAQDDAYRAVVQR  
RE\*

>SPBDM4\_v1\_50642|ID:27159005| Extracellular solute-binding protein family 1 [Uncultured spirochete bdmA 4]  
MRKKKIASMMVLLLLAVALGSLWAQPKTTLTVLWFNDANESDVF MATMADYQQDHPNVTI  
DMQVIPFKDYENKLRMLIAGGNPPDVARLASAHVPLFANSLEPLSGKPVFDELAKGYFAS  
SLALGQDDNGRVMVMPT EATANGMIVNKTYFKNAGIDVDKLSQTWTWDQWVDAMKKVLKA  
NPKAKYGITVDFSTHRFSTFLYEAGGRFLSSEGKSMNFNTPETLDALKFFKMLHDEALAP  
KSVWMGSEN PQELFQSGLVACHVGGSWLINA YSRNIKDFEWGVVRMPSRKINSSVPGGKF  
VGTFKNSPNKKEALDLIAVFSKHAHQYCRDTFNLSARKDANITYASRSKDFAVFTEDL  
NLTPAYTADDWKS DVVAKLNSYAREQIVEGLLGKQTMEQTAANIQA KGN SYFK\*

>SPBDM4\_v1\_50643|ID:27159006| ABC-type transporter, integral membrane subunit [Uncultured spirochete bdmA 4]  
MKSQRSHGTFEQTRAPLLFLAPNLIIFSLFIILPAIMGLRMSFFDWSILDGSKYIGFKN  
FRDILADSMFWLTLKNTLIYVVA VVPLLSISALALPLAGEGKGMGVFRAIYYVPTMLS  
MIIVGIAWRWLLGYDLGIINYAIRLAGGKAVSWLTDGTMANISLIFVTWTRVGYFMMM F  
IGGLQAIPKTYEAAEMDGAGRFTLRRLRRIPIPLPKPIILVVVVLSTIEAFKAYELIFVMT  
QGGPGTSTKFLVQYIYQAAFEEDRMGYGAAMSVILLVIIGIFTAIQFGARREEYTNE\*

>SPBDM4\_v1\_50644|ID:27159007| ABC-type transporter, integral membrane subunit [Uncultured spirochete bdmA 4]  
MNKFLKYTL LLIVSFVFLPILWVLLSSFKPQSELFTYPLTILPHRPTLENYVNAFASGD  
FITYYKNSL FVS VVATLITITINVMAGYALS KFWFRGRDLIFYVMVGTLMIP LQAIMIPI  
FILLKNLGLLNSLWGIIPPAATPTGVFLARQYLQTIPDSFIEAARIDGAGEFKIFTMII  
VPLAKPIIATIAIFSFMWRW NDFLWPFIVVSANKKMTLQLALANFVGQFQINWGNLLAMT  
VVTMIPMIIVFLALQKYFVKGLTAGGVKA\*

>SPBDM4\_v1\_50645|ID:27159008| Glycoside hydrolase family 31 [Uncultured spirochete bdmA 4]  
MLHALKNLDGLRVEGGKAYLSGENGRLEV TIHAPHVVS VFYVFDESIVSPASNIPHAGLF  
ADYAPGGLPDAGGIHGGPAISWDSASESGPGYELRHGKTEVLIDKATARVSVYENGVLVH  
GGEIGHKDLVVPQYPLRVQQGAAQGSVRGKFNFRLEEGDAFFGLGEKTGRLNKRNR SFKL  
FNRDALGYDAESSDPL YISVPFFMKVNRGRGAF CGLFFPNLQVEEVDFGVESMFY YDVVL  
DGGPFGYYVMTGGRYRDILSSYCKLSGMPALPPLFSFGYLTSSMGYTPDNAQERILEFF  
DRVEKADIPCEGMYFSSGYAKADNGERYTFVWNREKFPDPGRFIRSLRERGYRICCNV KP  
GILSGHPWYKRLAAAGVFIPGADGAPLKSYYWANSASFVDFSRKEGFDWWGKALTEHIID  
KGVAGVWNDNNEFEIEDDSLPAQTYKKFLPVKMAQASFEALRKANPGKRPWLISRSGYAG

LQRYARTWTGDNVSSYETFRFNIVMGMNGLSGLPMYGHDLGGFVGPSPDEELLRWCQS  
AIFQPRFVMHSWKPDGSITEPWSFPHRLDAVRHFIRERYRFLPYIYDLAIRASETGIPL  
SPVALDFPDDPSLSYESLDRMAGDAVLVPGPPGRGETAVRLRFPAGADWFDPAKEVLHRG  
GTLLEFNYPLDAVRYFFRCGTVIPTSLKTDVPGKTAPDEYEFLVPPADAGDISPLHAAC  
VHSEDDGESDFVAGSYWRWRMDFEMPREGDYVLNITRTASACATDYRKYWRFSVPKGFVI  
LDGNRYADGRSVEFRFQSAPEHIRLVLRGAYRTNGT\*

>SPBDM4\_v1\_50646|ID:27159009| Transcriptional regulator, LacI family [Uncultured spirochete bdmA 4]  
MVTIRDVAIAAGVSVSTVSHALSGKRPISQATKDKIHDAIERLGYEPNPAARALRTTTS  
VIGFFAFDITEVFAARIHGAEKIAREKSSYLLFTSGVEFNNDITSAIDFLRKRRVDGII  
AAYGVRQAIRPEMRVAFDLPAVTVNTFIYDSIPSVQPDDFAGGREAAHLVARGARRLAV  
IAGPEMRLASMERLAGFTKALEECGIGFDPSRRVVHGDFTAESGAHCMDVLLVCPDMDA  
VFCANDYMAAGAINRALARGRTIPGDLRVVGYDDREFSSFWPIPIITTFALPLERMGEVSA  
AMLFERIEGREPDPMRVLLPSRLIIRQSS\*

>SPBDM4\_v1\_50647|ID:27159010| Ser/Thr protein phosphatase family protein [Uncultured spirochete bdmA 4]  
MKRYTIFLVICLVFAQAVFGGGTGDSPASQNPGGQQCMAEGIGFTLSAYNPRGSFEKLYA  
VREESGSHSAPEELTRTDALETDMNLTVFHFNDLHGHTDQDSKRGDTHRVAQMVKIVDA  
ARKNADERNIVLFFSAGDEHTGTPFDELLGWNAQEFIVDPAYRILSAAGVDATVVGNHEV  
DRGYELLA KGARQDAAFPVLSANIVGSRWATPDVIKPA AIGIAKGLRIGLIGLTTPEETR  
EATVEDPNVRIAAPLESIEYYLPRMEPFVDVFFVLSHLGFEGERHRVSVGDRAIAEAS  
RCTGKPVLVIGGHTHSVLNKDGLEAANIVEGIPLLQAGSYGAWLGRMDVSLARKEGEYAA  
TDMKAALLPIKSRDDRVASDQKGWANLEHEGDYDGRFEKENVEPILTRLAGKMKERLGRT  
AATQGFSTERILAERYVGECEGMANYMNDMIVARSANFPGGPVDLAVFNASGIASGVDGNT  
DVTFGDWFKVMPYADNIVIIISLSGAQLLDVLRNAQRLVRPEELAGTKPIALDGFVSRGF  
LHFSSDLRYEIRLGANAEAATVENASFRGVDLRKTDPKIFRIAFSTYIANGFEGWKTGPV  
GAGLPQGVLAWDLAALDKLDTGLVYRNEIIAGIKEWGRIAPFGGAAGPLDGRVTIRQ\*

>SPBDM4\_v1\_50648|ID:27159011| Band 7 protein [Uncultured spirochete bdmA 4]  
MTTFIIVIAVVVVLFFSGIRIVRPTHRLVEVFGKYRSFAEPGFHWIFPVIMRMFQVNTT  
EQMVNAEPQEIITNDNLNASVDAQVYFRVLPDERSVKASQYNVNNYQLQIVSLARTTLRN  
IIGTMTLKSANSERSRINTELLQTLKEDWDWGISIVRTELKEIDPPKDVQETMNVVKA  
ENEKIAAIDFATATETMADGQKRAEIKKAEGIRQAEILKAEGEAQAIQLVNEAADRYFVG  
NAQLLKRLQTVEESLKNNSKIVLPTNGELVNVIGDLAGVPLKDKKPKQ\*

>SPBDM4\_v1\_50649|ID:27159012| mtnP| S-methyl-5'-thioadenosine phosphorylase [Uncultured spirochete bdmA 4]  
MDKATVGIIGGSGLYEIEDVEVLEEIRMDTAWGAPSDAITIARIGGIRA AFLPRHGRGHF  
ILPTEVNSRANIAALKMLGVREIVAFSAVGS LKEEIRPRDFIIPSQIIDRTKDRPGSSFF  
GEGIVAHMSFADPFCGR LCKIIEPFVVARGLRLHTEETLVCMEGPAFSTRAESRLYRSWG  
AGVINMSALPEAKLAREAEICYAMVCMATDYDCWKT DHADVTVDMVVENLNANSAHAKAL  
IKEVVPALGGGEDCSCRSSMRYALMTAPAKRNPETLAKLKTILPELR\*

>SPBDM4\_v1\_50650|ID:27159013| MATE efflux family protein [Uncultured spirochete bdmA 4]  
MEQKDPRYTKMVQARIGTLILSLSVPTIISMLITSIYNMADTYFVSKLGTSASGAVGVVF  
SLMAIIQAVGFTVGMGSGSLISRL LGAHRTDEASKVAASGFYMSIFFGGLVAAAGLLFLD  
PLMQSLGATDTILPYARDYARYILFAAPVMAASFV LNNILRAEGQARLAMVGIATGGILN  
CGLDPLFIFVKMGISGAAIATALSQ LISMILLSCFVRGKTVCKLGLSKISRTPDTYLQ  
ILKNGLPSFCRQGLASISTVALNVNAAVYGDAAVAAMSIVGKIFMFIFSFTLGIGQGYQP  
VLGYNYGAKKFRVREAFFFTLKT CMAIMTVCSIGGFAAAPFLMKLFIATDPAVVAIGAK  
ALRAQCLAMPLIPLGVMCNMTFQSIGKSWTATFLAAARQGIFFLPLILVLPFLGLTG VQ  
ITQPLADLCTFLCCLPFTFHFRELKAEKTVAT\*

>SPBDM4\_v1\_50651|ID:27159014| exported protein of unknown function [Uncultured spirochete bdmA 4]  
MRQHAFMLALLFAASGVFAEGWDEIYTARLNNSATY LESKLTLSAEADYAGYTKPYIPT  
VSISTGTS GSDDTYESGLVVGSDGATSGTLIPSITFEKLLGGADLSFKAPVNIAS TGEVS  
MGNPALSVSRTLFPETAANQLDAEAALISAQASLQA IKNDIRIELATDVLDTIYYRRLLE  
SSKENLEILEKVRKATVDTTQRELDKSILEAQKSILTATSALADIKDDVKNADALYED  
ITRLQSGWLASINGEEP KSSMTIRSLELSLAAAEKRKSFSILPYLPNPTIAASVYYNVDT  
SKVDWALSFKLSYDLVNKNENALSALKREEYPKIYSIKLEEAQKGLKDGLRQINDTLES L  
DLDKKIKDIDLADSDDDMARQEKL YNGGFISEEDYVMAQIDLAILKIEAQKIDFDILIQK

LKLAQYYEESQ\*

>SPBDM4\_v1\_50652|ID:27159015| exported protein of unknown function [Uncultured spirochete bdmA 4]  
MRSRGSFFLALCALSLVCSTVPVAAGTLEELFTAATKSNQDYAVYKLDLEIANLKKTKE  
IEAKVELDRVNAQYTYVTSLADYQSLVLSFYDKVIDAVFDAATADLDDQSAALSLENAKE  
DKKYADVRYQNGLISEDVFKEIGIAYDTAVSDKQLSEYTLQDAKDHVRLATGLEWSWDL  
PEIPSEFESATSEEWVARDMTLEQANLSKKIADLTAAALATNTSVYDRRIQETENVKAEV  
AVTNAENNAKRSYESTLSSIKNNAALLQIRKDEYALKETLYKEAQRQFENGITISLGSKNE  
KAIDVLSARQNLTAQKNYIEAVASYLSAMGETPLGL\*

>SPBDM4\_v1\_50653|ID:27159016| Acriflavin resistance protein [Uncultured spirochete bdmA 4]  
MSVVRKSIDHPVTIVMVFILICGVA AIFVSQIPVSLNPETDMPMLS SVSTTYSGAGPEDVE  
QNVTKVLENALSSVEGLEKMSSTSAQGSSTINLEFGYDVL DKAQSEIESDINGVLDSL  
DDAETPNVRRFNMSSMPIISLAIKGDRPLKELQQIGEDTIQPQLERIKGVASASVVGSD  
EISVEVSQNRLAAYGLTVTDVASALASQNVLLSGGNIVRGTMEYQIRTHENLSSIDEVK  
NLAIKTVASDDSGNNRVIRLQDLADIKEGEDDPDLVYIDGQRGINVQIVKESGSNAVQI  
SRQVHSLVLSINKSLPAGVTVEVLSDDTTLVDSTLKEVYNSAWQGILLAVLILFLYLRNL  
KATFIIAISIPISILITLLCMYFSGTLNTISLTGLIMGLGMVVDASIVILDNIYRYRER  
GTKSRIAALLGSQEMITAITASTLTLCVFIPILFRNKLGMGQLFNDLVFTVCFSLAA  
SLIVAVTIVPVLSPVMHLETRTQKPKVKNPFLKKIDDKLEQFFSAQEYKKALEFCLRN  
RLLIVALVAVILVVSLLYLSSFGLNLFPRSNDDSLTVNLTFPLGTTTAHTQEVLEDLQA  
NVQQDVKGFKSLILTVGGSGGPFSGNYTNEGSLQIMLPEPKDQTDPTSIKTKLTPYLES  
IPGASFSYTAGRQFSSSAVDVEIRSKDQDASLAAQEIKRILATELPEVENFSISLEEG  
SPELLIKIDREKAAMYGFSVSQVAQEVNAVYGVTAATYNSAGDMIDVVRLREEDRRTL  
SDIKSLFLITSAGDKIPISFVTISNSTAPQQIKRENKERIIHVEGDLPASSKVTSTEMA  
QQVQKVLDEKYVPRDGVTVSLGGESMDVGTYPVFIILIAVAIFLVYGVMASQFESFVDP  
FIIFLSIPLMLIGVVWYKLTNDSFSLFSMIGIVALAGVVVNNGIVLVDYTNLTLRARGYG  
LFEACSEAGRHLRPLMSTQTLLGIMPLALFPGEGETIPIAKTMFGGLLVSSIMTL  
FLTPVLYNLFNSRRERKNVKKERETRNLKEAAAMKAAEDKETNDGAN\*

>SPBDM4\_v1\_50654|ID:27159017| putative Efflux transporter, RND family, MFP subunit [Uncultured spirochete bdmA 4]

MKKAQVSHVPQIVITIVIVVIAAVIILKALGISFTKSSSPSAKELPSSPSVLSGQLLQTG  
GEETRTVAVRASTIALGSISNYTKLQGDVVSNEIKIYPNIGGKLLTREVSVDVRSIGT  
TIAFVDPSKVGEKYMPNPVESTVSGTVLSLPVHEGDTITTTSTVIATVGDISRLKVSTAVP  
ERFLANLKIGSSAEVSFDAIPGIVYTARISEMNPVLDTTSTRTLKINLTLDRPDSKVLVGM  
SATVTLVTEHRGKVVVVPRSSITDTNEDYIFVVKSDGSVEKRSVALGLEGEFFEVKKG  
LSVGEQVVTEGKNSVTNGSKIKIIDGNSETEAGVVSQ\*

>SPBDM4\_v1\_50655|ID:27159018| membrane protein of unknown function [Uncultured spirochete bdmA 4]

MASLPSKPHRERDVSRILMTLFFLFHMLITQPISFRRGPEGESPADFSLMSALNIAII  
GFWFILEVFEFLAWNYKWKNLKYGVTTITAVRCIPVLALVAFFPRLIPGMMGFMAPLLTFY  
LSLVFSQVWSYVVVAIFWLIQLLLFFTAGLSATPPKSDRSYGVVILLYQLMSMMLMFLFA  
QFWKEDKKNRERQAALTAIEIQASQEELKRYASKVSHVVALEERTRIARDIHDNLGHTLTA  
ISIQLNKAEAFFRKDPEVSIQAIVDARSSMHEAMLDIRSTLDTLNAQVEGFDLLSQVQKP  
LESLRQTGISVLSDIKGSTEGYNISVLLALYRFVQEGVTNILKHAEAEVNLEIRLDGDQ  
AFAELRDDGRGFDPRAMKNRKNNDASGYGLTGLTDRITLVRGTFSVESAPGQGTILKACMP  
KDPVALIGKENTDGSDR\*

>SPBDM4\_v1\_50656|ID:27159019|yfiK| Uncharacterized transcriptional regulatory protein YfiK [Uncultured spirochete bdmA 4]

MAPIGKKIKVLVADDQRLVRDGIASLLGLDEEILVVGTAENGKEAVALARQCRPDVCLLD  
IRMPIMDGISALEHIRAEGTSQYIVMLTTFDDREYIVRSIRSGAVGYLLKELPREDLVRA  
IKQVVKGVFLANGEVMNKLLGSLQSLQDEEKELSSDTMALEQCSYLTERERHVLALVGE  
LTNSEIAETLSLSEGTVKNYISNILTTLGFRDRIQAALFAARNGLVRK\*

>SPBDM4\_v1\_50657|ID:27159020| GCN5-related N-acetyltransferase [Uncultured spirochete bdmA 4]

MKVEISDINFSTFADLFSPCNRCIYWEAPEQFGGNEHARRSLSGKEALGIKKA WFKKTQE  
IFGRCGLILYAEGETVGYAQAQYAPPALLPNVGGYAQSIAPPSQDAALISCLYIRAEYQRQG  
LGKMLLQRVTGDIQEKGYRAAETYARDDSPDNCSGPTAFYLSNGFTLLKTKKWEQATFSL

LRLDLTE\*

>SPBDM4\_v1\_50658|ID:27159021| conserved protein of unknown function [Uncultured spirochete bdmA 4]  
MKLDWKKGEKIYYLPKEQPELIDIEPKYFTVRGRGNPNDFFAEYISVLYSLSYAIKMS  
PKQNCAPPDYVEYTVYPLEGVWDLTEEGRNDYRGTLDKNKLLFTLMIRQPGFVTEEYAAE  
TIEKTKRKKPKLLEEVHFERMLEGKCIQMLHIGGYDAEPASFRMMEEYAKSLHLERINR  
QHKEIYLSDPGRVEKNELKTVLRFVQ\*

>SPBDM4\_v1\_50659|ID:27159022| exported protein of unknown function [Uncultured spirochete bdmA 4]  
MKKSIVLLIVSLSAIGAFEDTTASRKVVLETNLAYLGLSAFSTNGSNMFLVIPLEAQV  
MISDRVSVNPSLTFLYFGNSGGISDGSMLLGECEGIGYHSGREALCGWSAGISPLAYAFD  
SKLFAFVLSGELGYQWILGKGLFLGLSGGGKYIWMNGNLVIPDLKLRIGYAF\*

>SPBDM4\_v1\_50660|ID:27159023| Peptidase S51 dipeptidase E [Uncultured spirochete bdmA 4]  
MLVLIGGGEIANGETLAIDRYIVESCGKKRPNHLFIPTASGEPEGYIATVQKVYESLGCR  
CDSLCLNTGVACDEIKQKIDDADIIYVGGGNTKFMISEWKKVGDIDKLLKNSWQTDKVIS  
GLSAGSICWFEYGISDSESGNADWDYSYVRGLGALRGYHCPHFDDREKESRFNRFVEL  
NKKSF LAIENKCAVSIQKDEYTVRSKDKNAYVVAFHARGMIKTKVEDSGDIKSILSRC  
N\*

>SPBDM4\_v1\_50661|ID:27159024| protein of unknown function [Uncultured spirochete bdmA 4]  
LPEAEERISYNMPSFYQNGTVRKIVEFRLRENLAKTGP\*

>SPBDM4\_v1\_50662|ID:27159025| conserved protein of unknown function [Uncultured spirochete bdmA 4]  
MIRKSRPEDASRMADIQVFGWRYAYRTIVDDRILFSKLNIEKKAQSIRKTIENDTEEWLV  
FEDEIIGKIMVIGRSRDEDKKDSFELWCYVDPLMMRQGVGREMLEYCENEARRRGYRE  
NSLWVLERNTIGKNFYEKNGYVADGKRQELEKLHAYEIRYCKQL\*

>SPBDM4\_v1\_50663|ID:27159026| protein of unknown function [Uncultured spirochete bdmA 4]  
LAILFTLIILDYLERYIFPPERVKVIHLYFHGAGIDTKKIKKALSAYKIGIQSIDVVQS  
IQKEKVQVNVLARTPVSLNINEFYKELQNLDPDIYKIKMEESQ\*

>SPBDM4\_v1\_50664|ID:27159027| putative GCN5-related N-acetyltransferase [Uncultured spirochete bdmA 4]  
MALFRKADLEDFDAILPLKNEVHQKHVQAEPDFYRNLQNAITKEEY AQELQMHEVYVLED  
NNKIIGYSFCYVMEIKDHPILNQQKIFFIDDYCVARREKRKGYGRAMFEELEKLAKAQQC  
TSIELNVWDFNEEAKTFYKSMQMRTRIRMQKALG\*

>SPBDM4\_v1\_50665|ID:27159028| conserved protein of unknown function [Uncultured spirochete bdmA 4]  
MEFIIRKKQNSDNAWITELLRRDWGGDFITTRGVKYSRDLRGFIAENKQKVVGICLYNI  
KNEECEIVLLEAFVQYQGIGTGLLEKLRDQNEKSS\*

>SPBDM4\_v1\_50666|ID:27159029| conserved protein of unknown function [Uncultured spirochete bdmA 4]  
MVRKTFYGDVYSTINEQFAHIINVQNYLAQIGTGIETGNDLLSSRRGFIEQLRSKYLAE  
GNRLYKNEEESWTIKKIARRIWHDRIHAKAIGRMEKRKSADAGTASH\*

>SPBDM4\_v1\_50667|ID:27159030| protein of unknown function [Uncultured spirochete bdmA 4]  
MRVFSFEKLASPDTKEKYGFVRELLNTGKERPRDLYPYLPQIVTLLDSENNIIQWAGIDL  
LGLLITVDRDQGIPPLPRLYRCLNTGKMITANHAVWALFEIAKAESDSQNEILEQILRT  
QEYQYDTQECKNIVYGNIKGARALYPGIRDESTKKKIYDFIEAQTSSNSRNSTKKKAEEF  
IKKYAHFEYNWE\*

>SPBDM4\_v1\_50668|ID:27159031| protein of unknown function [Uncultured spirochete bdmA 4]  
LRLTALS RGT RDEIGTVFDRLEPVLQNYENEGFTWKNTGSIENACIQF\*

>SPBDM4\_v1\_50669|ID:27159032| conserved protein of unknown function [Uncultured spirochete bdmA 4]  
MSLERAREHLQKWDKGEEIKELNVSSATVGLAAQALGIEEARIAKTLAFMIDARPILIVT  
AGDTKIDNKKYRTLFGTKARMIDKDLVEKYVGHAIGGVC PFGINEDVSVYLDVSLKRFAT  
VYPACGSANSAIEMTCEELEEIGRAEKWIDVCKTEL\*

>SPBDM4\_v1\_50670|ID:27159033| Ribosomal-protein-S5-alanine N-acetyltransferase (fragment) [Uncultured  
spirochete bdmA 4]  
MRYETQRLVMRTIEPDEAHL YQRYLLDNKVFLSEWEPERENSYYDEENIKRMIHSGTLSP  
\*

>SPBDM4\_v1\_50671|ID:27159034| conserved protein of unknown function [Uncultured spirochete bdmA 4]  
MDQFSVIEKYNDNVEAEWNRFERHPIEFIEITKRILSGNLPQPPARIIDIGGGPGRYSIW  
LAGQG YDVS LFDLAQANIDYAQKMANRANVRLREHITGNALHLSQYVENDTYDCALLMGP  
LYHLIEEDRASVIRQTLACLKQGGSLISSFISGYAPIIDILKNYPDKMNGNIQEYLAYL



EDGRNIVSDDNPGFTTAYFMDPKKIDAFMNNFNITKKGLFTVESILGPYENLLKSADTHT  
FDSCVELAMHFVEDPSCRACGEHLLYIGIKK\*

>SPBDM4\_v1\_50672|ID:27159035| protein of unknown function [Uncultured spirochete bdmA 4]  
MLFSSVDIQKQKARADGPIVFPNTAVDGTIITGSPVFRSNVLDLFRRANNHIQVEDAIL  
PDGTLDATMPLSEDITIGDSLVCCKNALPHCNKKQWFMENRDNVLGFIGYRNSVPVAILE  
IMRSEACPFTGITQNHQHTAAILCFYSNPDDYDYKYDLLRKSVDTIKDMGIRELEVIVGER  
GYYPNGSLRQFEDYGFVRQKALGRTYLLNRGYDALWLIRKTL\*

>SPBDM4\_v1\_50673|ID:27159036| protein of unknown function [Uncultured spirochete bdmA 4]  
MQDHILGAGFVGVNNTETFDYIPAFIILGSSHIALAFCQSFFVGFISNVSLFM\*

>SPBDM4\_v1\_50674|ID:27159037| putative Uncharacterized methyltransferase Clos\_1076 [Uncultured spirochete  
bdmA 4]

MRGELPATFASRLICTLWCRGQDKGKMIKSACHDNQAEHYDLQVKNSQNDTSDYIRENY  
ATIHQTALHMLELNPRDRLLDIGIGTALLEEKITTKLSFYGIDISERMLAKAQEKGLSIE  
LKKGSFSLIPYPEKYFTKIVTCFAFHLLDDTEKSV AIDEMFRVLTSNGILVIADFMYKNK  
TEKANLTKRFTTEGRKDMLEEMEEENFTDIEWLTGIIKRYGRKIYTLQGSTISWIVKAA\*

>SPBDM4\_v1\_50675|ID:27159038| protein of unknown function [Uncultured spirochete bdmA 4]  
LYTSASVLFKLLKLGKTDEACVQVEFLFIYSTIILYQPRPGIEPGTCALRVRRSAR\*

>SPBDM4\_v1\_50676|ID:27159039| Fructokinase [Uncultured spirochete bdmA 4]  
MLIGAIEGGGTFKICAIALFDPDDSAEKKPEIIEQIRIPTEGPEVTLAAASDFFRAAQDG  
RRESRQGLKVRGGLNIEALGLGMFGPVECDTRSPRWGYLLNTPKPRWSDIDVAYRLQREL  
GVPVRLTDVAAAALGEWKWGAGRGAKVCVYVTVGTGIGAGILVDGAPLRGHFHPEVGHM  
RVPKIVKDLGAKASGGHSSLRGRGESAGSGQFADTGFEDKFKGVCIHHGDCLEGLASGP  
AIKARWGIAPEDLPADHPAWRLEAEYLALAFSNIALTVAPDRIIVGGGIGLHDGLLDMVA  
ERMNGLLGGYIQALDSADAIRRYIARAELGADAGILGAAQLGWEAARP\*

>SPBDM4\_v1\_50677|ID:27159040| putative GCN5-related N-acetyltransferase [Uncultured spirochete bdmA 4]  
MFSSFNKEYESVMSNNGAFKGVVLMIEILKDWQQAPGQPYTLLELRDGGKTLVAFAIL  
HQVSGRNFTDIRFIVLDRDYRSSTAIQHLFEMIDEELLKKIPFAVIRIEISSVKKESLG  
ENALENASYCQIGHIAAYYGENDDFFFYIKAIFRNPPDFIKISKPFEDALSSAAPLEEIH  
TQEENG\*

>SPBDM4\_v1\_50678|ID:27159041|kdd| L-erythro-3,5-diaminohexanoate dehydrogenase [Uncultured spirochete bdmA  
4]

MPMGNKYGTNRVLEPAGAMPQTAQKLDNDMSKLYDNEILVDVLALNIDSASFTQIEGEAD  
GDEEKIKAIIMNIVATRQKQNAVTGSGGMFIGRVAKIGPALAQRDLRPGDKIASLVLSL  
LTPLKIRRILAVHRDIDRVEIEGQAILFESGIYAKLPGDMDERLALAALDVAGAPAQTAR  
LVKPGDRVLVLGAGGKSGLLCCYEAMKRGGPTGHVVANIHSERSRTYIQEMGLAHEIVVA  
DATKPVFLEKVLAAANKGQEFDIAISCVNIQGTMAAILPVRDGGTVYFFSMATSFTRAA  
LGAEGIGKDVLMIIIGNGYTRDHAETLWELRENQKLRKFFEQQYVK\*

>SPBDM4\_v1\_50679|ID:27159042|kat| 3-aminobutyryl-CoA aminotransferase [Uncultured spirochete bdmA 4]  
MMPKEFPRLKLDASMRMYAEAREVCPGGIMGIRRPYNFVEGEYPIFLERGYGGHIVDVDG  
NDYIDMLCAYGPILGYNEPEITEAVIAQLEKGFCSLVQPIQNELEERRLVSLIPCAEKA  
ILVKTGSDATSLAVRIARGYTDNRNLYRCGYHGWHDWCVEIHGGIPEEISNLTFEYGR  
LDDLEAKLAAHRGRVAGVIITPVGHPNAKPVMAPPPGYLEAVKELAHAGAALIFDEVRT  
GFRVSMGGAQSRYGVTPLATFGKALANGYAISAVVGAREIMQVAEKKVFSSTFFPNSL  
EMVAAMKCLDILERERVPSLWERGTKFLGRLRDIAARSGMPVTVSGIPPMPYLTFNPHF  
ADKEKTYRARREYFYTQTIRRGLFVQPYHHWYIAHRHTDADLEKALEAIDEALELTARRF  
PVGS\*

>SPBDM4\_v1\_50680|ID:27159043|kce| 3-keto-5-aminohexanoate cleavage enzyme [Uncultured spirochete bdmA 4]  
MERKIVITCACTGAETVKAQNPALPVTPEEIAAFAFDWRAGAAIHLHVRDEEARPTMS  
PAVFKKTMELVRRKCGIVIEITGGAVGDSPEARLAPLEPEMASLDCGTNFGDDYI  
VNSLPIMRHFAEAFRAHRVRPTLECFDLGHVYASRMLIDEGLVEAPFHYGVVLNVPGSVS  
YSIENLLAFQRAMPKGAYFTVMGIGRSSLLAQYGAIAAGGWIRVGFEDNVYYAKGQLARS  
NAELVERAARIAKEAQLSVASSDEVRAMLNLRG\*

>SPBDM4\_v1\_50681|ID:27159044|kamA| L-lysine 2,3-aminomutase [Uncultured spirochete bdmA 4]  
MQEFPSFDWKRIPLFKEVTPDEWYDWRWQMRHNIRDIDALAQVPLSGQERHDIEEVLRI

FRMAITPYASLMDPANPACPVRLQAIPIRIQETHFLASDQADPLHEDVDSPLVGLTHRYP  
DRVLLLATNVCSMNCRHCTRRRFVKQEDAHQSEELIDAAVEYIRKTPIIDVLSISGGDPF  
VMSTERLERIIAKVRAISTVEIIRIGTRTPVVMMPMRVTDELVNMLKKYQPIYVNTHFNHP  
KEITAEAKEACERLADAGIPLGNQSVLLRDINDCPVLMKKLVQELLMIRVKPYYIYQCDM  
SLGISHFRRTVSKGIEIENLRGHTSGMAVPTFVIDAPGGGGKIPVMPDYLITSNEKRVI  
LRNYEGVITSYEEPESYKEDCGQCRICRDEPWLNPCTCGVARLLSGEEKALEPKNLARLNR  
HKAETGG\*

>SPBDM4\_v1\_50682|ID:27159045| exported protein of unknown function [Uncultured spirochete bdmA 4]  
MPLDASSFIGNLSFFAGFSAASGKTMAMKAALACIRGVGARAAILCAGHEGERPGSGAGG  
TSVEVWEGEIFSTAASFAGRLDCAPEIVAGELGTSALGPVIVRAGRREGSGILVGPSESA  
ALAAVADEAMRAQYPHHTVLDGALDRLSPISALPNAQLFCTVRIDRANLMHMSQRMADL  
HRRSHLPLWTDEQLRRGAHIILDGPLSRMVLEKYAVQEHAAFVVKDFAHIFLRPEELALL  
AAQNKLFFVQKEIDFHGFIVALCDVGGQEECGARLPPEVFASILSWNPYEDEKHEHGLP\*

>SPBDM4\_v1\_50683|ID:27159047| protein of unknown function [Uncultured spirochete bdmA 4]  
MHDIVPIPPHVASFRLNSMLSHIVPLSPYGRDRVAEIGLVTDAGILESLYDDIEAAGAF  
LAKLDEVRRDRLFVHFGKLPRIQNLVAAPCGLMELFLFKKFLHYRNICDLVSEEFRDH  
FGIVFESSDLLEALSAGSRDAESFAISEGHEPGLGPIRARIAEADQTV AQRRQTLEAACQ  
EAYGFDFAGREFIVISVDRALAAIEKGRGGEAPSLAEPYDAHSMIVRIIPDAVLLGAEE  
DRRRAREEERLLEQTAIARLSGLVAASGGALARYCSAVKRFDYALA QWKVFRQYRLVRPA  
LLKNAAGDVHATGADRSDRAPAGNAASLSCRGARFIPLEEECVSRGVPYEPLDFTLDRPV  
GILSGSNMGGKTCVLQTLVFLQVLAQCGMFPVASHFETPVFQWLDVVGAEGETAGRGLSA  
YGFIEIRRLIDVLKAARDAPGLAVFDEFARTTSAGEAEALMQAIVEHLASFSGTLCIFATH  
IQCSPAQKGKRAFRMAGFDAGQARATLNSGKAKGEETLEALLARINSLMRYRVVPRDESG  
EVSDSDALAVARLLGLDATLVDRAEELNLGARRDAHDKRRMARSNEEH\*

>SPBDM4\_v1\_50684|ID:27159046| protein of unknown function [Uncultured spirochete bdmA 4]  
LNVRKNAERARERSQMLDDGLHQSLCLARARRARKFIEDRKARGVPRCLQHIDEPADLE  
AIGRKPPARCLARFTDDIEPLKHRFCFKVRRGHKHAALCQHLKEHKSLOHAGFAAHIRTAE  
YSDGSIQKIERLVGYSARDAFFFERYKARASAGEGSRVACRRSVAAVGPRSM DIPGGVF  
EKCRPHQAILPKLPLGERIVKALYGA AIPGKRAARSGDEAGEPCNCRLKETF FFFAGPA  
AVFLRPEEDGIGDNAHDHRMGIIWLGRKRGLAPAPFFYCGKRSVHRYDNEFPAGKIKAV  
RFLACRFESLPALGHSLVRLGYPGPDWTKTRLMTLGNRKTFRVAAARGECELEQVGGKDN  
AKVITEFFTDKIA YVPVMQEKFLEEKELHEAAWCRDVQLGNTGKFPPEMPEKPVSSDLVEL  
RKKGSRCLDVVIERFENPSISDKADFRDAVSSIGTERHYVGQH\*

>SPBDM4\_v1\_50685|ID:27159048|kamD| D-lysine 5,6-aminomutase alpha subunit [Uncultured spirochete bdmA 4]  
MTHNKLNLPG EKIDRARELAKNICAPVLD FIDVHTT VTERATLRL LGVDGVSSVGV PVP  
NLIVDALSDKLGEGAAIWYSNALLQTGLDQSELDKRIARGFN IASLPMGDRARAQ EYATR  
LAQRQFARIDANRAYREARLEEYRGNSHSPLLYLIVATGNIYEDVKQAQAAALAGADVIA  
VIRTTAQSLLDYVPFGSTTEGFGGTYATQENFRIMRRALDEVMEREKRYIYQTNYASGLC  
MPEIAAMGALERLDMMLNDSMYGILFRDINMYRTFVDQRFSRMINAYS GIIINTGEDNYL  
TTSDGF EKAYTVLASQFLNERFAYAAGLRPWQMG LGHAFEMDPSIENGVL YELAQAQMAR  
EIFPEHPLKYMPPTKHMSGDIFRGLVMDSMFNFVSKATGQDIHLLGMLTEAIHTPFMMDR  
HIAVESALYVMNGVASIADEIEFKSDGLIVRRAHDVLDRTVNFME EIGRIGLMESIERAM  
FADISRRTGGKGFEG LVEKGENYFNPVESTLTRSLGLA\*

>SPBDM4\_v1\_50686|ID:27159049|kamE| D-lysine 5,6-aminomutase beta subunit [Uncultured spirochete bdmA 4]  
MAKIIKPYGDAMDDGKVQLSFTLPVPAGSRAMEAARRIALAWGFHEAEV VHMAMPMSDEFT  
FFVVYAATSRGIDWDTVEGDRDDG EK PMSMDEINAFIRARIGR KIVVIGACTGFDAHTVG  
IDAIMNMKGYNHHYGLERYEMIDAHNLGAQIPNEKLIEYAETHRADAILVSQVVTQKDSH  
IHNLTEFMELLEAKGERGRFICIAGGPRISNKLA AKIGFDAGFGHGTYAEDVATFIVKKM  
AQERRT\*

>SPBDM4\_v1\_50687|ID:27159050|atoD| acetyl-CoA:acetoacetyl-CoA transferase, alpha subunit [Uncultured spirochete bdmA 4]  
MIEKTVIRPAEAARLINS GS VVHIGGFLGCGAPDGIVA AICEAGIGDLTIVCNDTAIYDP  
KTGRTTGLAPLILKGLVRKVITSHIGTNAETQRLLCEGKIEVELVPQGT LAERVRAAGYG  
LGGILTPTGVGTEVEEGKRKFR LHGKTYLLELPLPGDV AIIKAKKGD KAGNLIYAKTARN

FNPLMAGACSLVIAEVEELVDIGGLDPDQIHTPSIFVDYLVVV\*

>SPBDM4\_v1\_50688|ID:27159051|atoA| acetyl-CoA:acetoacetyl-CoA transferase, beta subunit [Uncultured spirochete bdmA 4]

MPDYTENKEIARRIACFFTTGDVVNLGIGLPTLVGNYIPENVTIILQSENGLIGLGPAP  
AAGHEDKDLTNAGGKPVITLPGGCFFDSATSFGIIRGGHVDYTVLGVLEVDQEGNLANYK  
IPGKLIPGMGGAMDVAVAGAKHVIAATTHFEKSGASKLRRRCTLPLTASHEVDYVVTDIGF  
FAVSGHSFALKEAFVPTYPEWIHKHTDADIELALDFRIWNSPEACR\*

>SPBDM4\_v1\_50689|ID:27159052|SUF system FeS assembly protein, NifU family [Uncultured spirochete bdmA 4]

MSDPFAAVYEEIIHEHYKKPKYRRILEGLPFAENPSCGDRVRSITLGADGRIAGAAFDG  
SGCSISMSSADILAEDIIGKTPEEARLLETFLAVLRGELDVDELDAFGDAVAFKGVARL  
PVRVKCAALAWRAALSQLDSIDRPQENSKS\*

>SPBDM4\_v1\_50690|ID:27159053|sufS| selenocysteine lyase, PLP-dependent [Uncultured spirochete bdmA 4]

MRAQFVAHAPVEENSSIAGALKREFPIFGERPELIYLDNAATAQKPLSVLDAERDFYLRS  
CANVHRAIHAIGEEATARYEEARRRMADFIGARPREIVFTRGTTESINLVARTFGETLQP  
DDEIILSVMEHHANMVPWQQLTERRGVSLKFIPVTEEGELDLAEYEKLFSPKTRLVAVTM  
VSNVLGTINPVDKIFAAAHGAKVPVLLDVAQAAPSMPLDARALGADFAAFSGHKMYAPFG  
IGVLYGTERMLDAMPPFMGGGDMISEVRLEGFSVNELPYKFEAGTPPVAQAVGLEAAADW  
LSSVGIAALGEYESALARFMDGIEGIPGIRILGSAARRAGIVAFTLGGAHAHDVAAYLD  
RFNIAVRAGHCAHPLARRFGIVSSARASFGAYNTREDVDRAVAVLAGAGEVL\*

>SPBDM4\_v1\_50691|ID:27159054|SufBD protein (modular protein) [Uncultured spirochete bdmA 4]

MSDTHTLERPKGLLTGSASGGQPAGSPDIEAARPGAPEVFGGGNATEAARLVFPAGDKSD  
EVRLVQIEVSPAPRESLHYRATIELGEGAEAKVLVRFAGSSAGIAVPPRPILLTTALEIR  
LAAHSRLKLYVSELSVPYFREAFLAVLQEGAKLEWTMIGFDENNGIYSANIDLSGAES  
ELDLGAYGAHRNTEQEHIISVHHSAPRTRSRNLKSALKDSAHLIFRGLIHVEATARGET  
DAYLSDRNILEDGARAESLPQLKIETDDVACSHGATTGGPREEALFYLMRGLDRDAAK  
NMLVLGHLGSVFSRLPADLAEEMEGAAASSLGIGDERSCP\*

>SPBDM4\_v1\_50692|ID:27159055|sufB| component of SufBCD complex [Uncultured spirochete bdmA 4]

MRTDAAVQREEIRNIGEGYAERFGFTMPEHSIFNTGVGLTEETVRAISAAKDEPEWMLKF  
RLRAFHFQNPMPMTWGADLSKLDLDFDRMTYYSRPTETAQDSWDALPDDIKKTYERLGVPE  
SERKFLAGVGAQYDSEM VYHNIREDLKKKILFTDIETA VREHSDIVKRFFGTVPVPPDDN  
KFAALNSAVWSGGSFVYVPPNVHVEIPLQAYFRINSQAFGQFERTLIIADEGSFVHYIEG  
CTAPVFSKDSLHTGVIEIILPHSRIRYSTVQNWPNMYNLVTQRAFA YDHAVMEWVDGN  
IGSKVTMKYPAIFLMGPGARGEVLSIAFAGKGQE QDAGAKIFHFAPNTSSVITSKSISKD  
GGIASYRGFVKVEAGLSDIKSKVECDALILDPHSRSNTPVMDIRSEHVAMEHEAKVSKI  
GEEQLFYLMRGLTEEEAAIMIVNGFIDPLVKELPMEYAVELNRLIELEMEGSVG\*

>SPBDM4\_v1\_50693|ID:27159056|sufC| component of SufBCD complex, ATP-binding component of ABC superfamily [Uncultured spirochete bdmA 4]

MQNGLVIRGLSAGLDTKRIIDGLNLEVPDGEIHALMGPNHGKSTLANILMGNPGYTVES  
GEACLDGDNLFELVWERARKGLFLAFQYPAEIPGVTVSKFLKRVADLRRDPPKNTSAFL  
AELKANFAMLDIEPSFANRYLNDGFGSGEKKRMEILQLLTVRPRFAIFDETDSGLDVDAL  
KVVAGGINQMRGPGFSALVITHYRRLDLVKPDAVHILEKGRIVASGGFELAEELLEREGY  
DGIRRVVDQKTREAYEN\*

>SPBDM4\_v1\_50694|ID:27159057| conserved protein of unknown function [Uncultured spirochete bdmA 4]

MAKKFSQNELLEILQGVDEPELGYSVVDLGLIYRAEQTEDGIEVDFTLYIGCPLEDQLK  
RDIVRTL RDATGIHNIRTKLVWDPWPVDRASAEVRLDMGYPIW\*

>SPBDM4\_v1\_50695|ID:27159058|NAD(P)H dehydrogenase (Quinone) [Uncultured spirochete bdmA 4]

MNALVVL AQPKPSFN SAIAEKVTESLESQGCSPVELIDL YNDNFDPVMPQEELPRKFSF  
DETTLYQERIQGADR VVFPYDWWGGPPAIMKGFLDRVFRPGIAYGFRETDFRND DAPG  
LFTGKRFDVFTTDA AAPPDGAIDTWPPALVWKRNVLAFCGVSDAVVHVFWNLRHSSYAQ  
RKAWLDGIPARLSIRPKSAQD\*

>SPBDM4\_v1\_50696|ID:27159059|pepT| Peptidase T [Uncultured spirochete bdmA 4]

MNRFISYVKVDTQSNRHGEETPTTKSQWDLARKLERELRELGVPSVELNDHCYIIAHLPA  
SPGAEKAPCIGLMAHMDTASDVSGSGVHPRVIKNYDGKAVQLSDQYVLDPAEFPDLVDHV  
DDTIIVTDGSTLLGADDKAGLAETMTAIAWLIGHPELKHGPIDIYFTPDEETGKGMDKFP

LQKAKAVACYTLDGGKAPEVEAECFTAYAVKAEFFGKVIHIGAARGKLANAVAMAASFIG  
MLPRSESPEATDAWYGYCPIEVSGTLDHAWTEVYLRDFSSERMQERIAALKAFAGAVES  
QFPAGHVKLEITRQYLNMKQKLDARPEVLEKLNRAITTAGYEPVMKPIRGGTGDGSRITEM  
GIPTPNLFTGGYNYHSRTEWASLSEMALAVETVVNLALIWAIE\*

>SPBDM4\_v1\_50697|ID:27159060| putative ABC transporter, permease protein [Uncultured spirochete bdmA 4]  
MASRGLPRKWTHRILVAKARPEYLNAMIIPTYPEFAPLELDARDSLYPGLNLLSDGISEF  
TFAGLYLFRHAYGYQISQLPGGSLVISGRQKEKTFYLPCCFPSLEQFDELMQRFDYMRH  
FSSEQARQYRIELEARGYLVEYEDRDSFDYLYNREDLATLNGRAYHKKRNLVNGFVSTYAC  
EQRPLNNSRVRDAIAVLDEWRSTKGVVEGDYAAALDALEHFDVGLRGAVYYIEQQPVGWC  
LGEPLAKGKAFAVHFEKACDRFKGIYQFVNQAFASQLPKHYQFINREQDLGDLGLRQAKM  
TYRPVGFVKKYRVVHPDSVDFTPAPPEPPAECGPGTIHECSDD\*

>SPBDM4\_v1\_50698|ID:27159061| conserved protein of unknown function [Uncultured spirochete bdmA 4]  
MTSAIPQPRFEILPLPEVPADEPLRRSLLAALPLSGRDEAGAISITFLAGAGTRWKTSL  
LEAKRAPGAWPAGDVAEAFPLEAPRGLFPVPDFIHGEQEGRIAMAAYAFDAVRGIGRHI  
VVIRGWEDEIDAQGLKPAJILPERRIFFTQETGPDGQVSGHGDATAQCMGLWQNAHYVVT  
NFAGDANSWLTVELAMRAFAQFDARGMEIGVLPVAHTEKPSYPVYLDLGLPAGFWHEK  
LAGSRPKAAPTSLTNVIRVYRADWLKRALLELRKYYVSGPDREAGWHIPGNDPAKHEC  
ALDNVDNLLAGKGLARVMPTSLPRELTPLKALGEYPAFVRAVKEVQQEINAARRGAC\*

>SPBDM4\_v1\_50699|ID:27159062| Chromate transporter [Uncultured spirochete bdmA 4]  
MEILNVSLTFLKVGVAFAFGGWSVVGLIKQEIWPRWMSPDANSLIAIAQSTPGPIALNA  
ATLVGWQRAGFWGALATLSVIAFPLAMSLALAFSKYIPLKKDLADESLRSGSMAMILM  
TLWTLPLPHTSLPMPWIFAFVAFGITAFTKINAVVWVILGAGALNMLLGVVH\*

>SPBDM4\_v1\_50700|ID:27159063| Chromate transporter [Uncultured spirochete bdmA 4]  
MKTPAKAEGIAKTVPSTPWRIFLTLARIVSLTLGGGYAIVPAIGNAFEKQGWIKKEEFYR  
VFSRAQVFPPIALTTSLCSYRIAGARGAVAAVFGVVLPPFFALILVGGFISLYGDEL  
FKRFLHGAGAVVPLVGSILWRTARNRKSVRIVIEVVTLAVLLAVFPSSAFFILIGGII  
VLYVGRVLVWKS\*

>SPBDM4\_v1\_50701|ID:27159064| protein of unknown function [Uncultured spirochete bdmA 4]  
MPPYNLIEALKLDEFQRDAARTEKTAVVVTAGAGAGKTRALVGRFLYLVLGKGVDPENILA  
LTFTRKAAAEMSQRVHEALGAPESPRDLADHLASVHIQTLDSFCREIVAASAAQYGYTP  
DFQIDEVACAQTAAKAAYRYVLDNRESGGLRNLLGAFGFDVVVRELFASFGSANVGPVHWK  
GRHICRASARLGEEEFKKTAWQLAEETREIAARILERENDVPPSGFREGTAQAIRAAKAF  
PSSEASASSDLEGFFAYMQRPENAINLRSVKGNETESAIKDLAKALRDESRLKKISQIVD  
FEKFLPDYYDIMDRLDEYADLLCQEKRRANIMNYNDLGALAVDILSGQEDVRRYWASRFQ  
YILIDEFQDNNDLQKRLLLLSKEEEKVRRGKLVVGVGDEKQSIYLFREGADVSVFKSLAGE  
LEASRFSLVRNYSARRLIAFFNAAFNVIMQPADSQNPQRFEAA YQDMESTPVPEPADFM  
SRIEYRCVTNEVAPGDFGGALLSAKETMAYRLALWIRSAVESPSPLFVRSEAQSAASGEG  
KQELALRKAAYDDIAILMRTTSRQYELEKYLRLMAIPFVTDTTASLFSEEPVNDLYYLLR  
LLLDAHDLFATAAVLRSPLCRISNDGYVAAILAEGKSLAELRTRIPLEALGAADHESVQNMI  
LFYNELRAISDHMPLMELVAHVWEHAHLELSILSDPQRLPYLDHWNAIRAIAADIEARGG  
HLQAFLAALRGYIHEEHSFDANAVPQEDTRGVHLLTIHKS KGLEFPVIVIPWMETAPNKN  
SGSELWGVLESAQTQGKTRFYTVDIGFHDRAEGGSNILQTAQDLRRAKERAETRRLLYV  
ACTRAIDHLIMFDAVPEKRSYDQDSFHALLFQSTERAHPMQGETEAQIPPHLSHLRFFFE  
PLASEQEVQMARKGKTARAQQSYAEDIETLKPDERNFMRPPRRLTASTVNAMATKDSLAA  
TTAGGLSAHIVRERLFEPARPDESSDGPDAASTQGADHSGFEMRSDPTAYGSLVHEMFAH  
LVAGKSVGNFAASPSVAREIRSLQLSDGGSGAPGEPATYSVIELASRQLMPLLQSRASF  
DILHNKTLKFEPFLALPPWSIEGRMDMLAESHDEVIVLDLKTDRQFSPHEYALQLGIY  
RIARALFPAKQVHTGLLYLHFGEIAWLKSELHEGTLQICDTISYNHTKQ\*

>SPBDM4\_v1\_50702|ID:27159065| protein of unknown function [Uncultured spirochete bdmA 4]  
MERYAALIGTPLGADIRQHLGEPDTIFVFPQSADSADSWAQALVKSEACKAVALDRFFGF  
NFLRHCATLREHEDFRTVQQIDRWAWALEVLDNRAGTSDPERGLPKRLLPPEETSTMHL  
SRLVGLIPGLYEVEALKRAEGAIRTVSYDFLREEFEEIESLARNYRNLYDRNHLFDGHLA  
PHVLPAAEVKVRAAYGLKEDFTRLGLIADTQNSQLAFPDIVPHGDVRGKAFNSYEYEFDSF  
LAEIASVFTEISKEIEQGLDPEDIAISVCRINAQKAAWIRQAEDVGIPVSIRWGEPLSL

TAFGRLLHAIQNAAREGLTLDSDAFSAIESIKSRNPEGWNLRDALRAHIPSPSPNAS  
YVHRLWKESGQIGLCTPSCAQMYQRLWQDITGIARAESFPQLYAQVLGFLEHWVDTSRFS  
ANVHTDRSMRMALDELQSWMEREDAMQRGPFLPFELYMTALGTKSYIPLLEGNAVHVYDF  
KTASGLAAISQYVVGASRAGLASSLEHQALPAELSALTGSKMAADVEEILAMHGIARTR  
YSFAREGFEGYEVAHPLFAPPSEPARAKRRRRISAGTASDSAPRAHCYSNPSPIDPAVS  
ARFLRSTQSFDFEKNLAVFSPYSLRDRARCAFRWFAQRINIEDVYSNDDTARIIGDFLHA  
TYQRTIKNLPQRLSESEAPARFREAFAIALRATLEKIFAEHGPGLRPTLVTLIDRARHRL  
GELWKFEREAFSAYEREGFEIPVSYAFEEEGAILNGRIDCVFRRTDESLGNVKCYIIVDY  
KKNRIPSLSEMKLRAQNAVRDDLESTGETESETEEGALTVREIQIPSYALMLELSSGIVE  
GALYWSIEKSEAVAYIKPPAASSLHQIRPAYTRREDTAPVRAAVRDMLARAATAVQGGEL  
LDPAPDRGACSDCAFKPLCRYWYFLEL\*

>SPBDM4\_v1\_50703|ID:27159066| Alpha amylase catalytic region [Uncultured spirochete bdmA 4]  
MALQINRTLRSQNTPPKHLWMPSGAVAIPDAVSARLVARKFQLPAGELRALSLIDDASRI  
IIDVYRKQLSKTLDQIASPALTASGDRAALLQVLQELTFPPAPMYDGLAEPGDWLESS  
TADKGGSGRPHRELAIEQFVLIRLFNENPACGPYRILFDDGVSPAGATSPGTISAKTPYL  
KVFARLEEALKTLPGLSHEKGTLDLISFLREPAKRAPHSLKAQLEWIIQNWGELLGDFR  
LALLAGIDMINEETAPRFPPGPGPVRAYQYRSSLHEYEKFTDRNWMPSVLLAKNALVW  
LHQLSKTYGKEIARLDQIPEEELITMAERINGLWLIWIWQRSPASEKIKKLCGNPEATA  
SAYSLFDYEISPELGGWEALDAFRESCGRFGIRLAADMVPNHTGIDSFWRTRPELFMSL  
PYCPYPGYTFNGPDLSSDPSVGIWLEDHYFNRTDAAVVKRLDRHTGEIRYIYHGNDGTG  
MPWNTAQIDFLNPAAREA VKERILHVASHFSIIRFDAAMVLAQKHIRRLWYPAPGEGGA  
IPSRSEHAISDEAFDKAIPNEFWREVVDLCAEKAPDTLLLAEAFWLMEGYFVRTLGMHRV  
YNSAFMNMLKDEKNSLYRLTIKNTQEFDRDILKRFVNFMSNPDEETA VAQFGKGDKYFGV  
ATMLATTPGLPMIAHGQIEGFTEKYGMFEKRSYWDETPDRDFIARHEREIFPLLRPLF  
SEIEHFYLFDYMRGDTTIDENVFAYTNGQGGQRTL VFYNNHWERTFGRIHTSCAFAQKTP  
QGGKHLETTSLANALGVEASPDNYVIMHEIRSRLWYIYRSEDIADGLSVPLEGYQSKVF  
LEIANVLDTEGRYARLYEIVDSKGIADLDDALLEADQPDLFRALHNAISSLSSVEAVQDL  
SKAEAIQRAAIFSEMFFSRLCAIAGSDDTGAA YRSEAVRNAIAWLRTVLAALYRTGVSDV  
SAEGLALQFENPRHLILLVYSFVAALAKSFAADGLKEEIGRMIDEYRIAKKLKEFAVEL  
SRTMPEDEKDYDASMSAEVAIAWALRKEKQLTELEMPASATSLKLHAHEILAWAFSDSL  
MRMALGINHYRGIEYFHKERFETFAWLLPACAWIDSIGPSEPRMDLKALASWKALAQLLV  
EQAADAGYMTNVMLEDTAAAARE\*

>SPBDM4\_v1\_50704|ID:27159067| Transcriptional regulator, TetR family [Uncultured spirochete bdmA 4]  
LSGQIAHEKRKQEILEKALDVFIEEGYEDTTFQKIAERCGITRILYLYFDNKKQIFNES  
LKRFLGSLESEIAIVAHDEHLNSEEKILKIGEIVVEACEKESRLLSIVMDYLLRLKASGG  
NPDEKVRRTVRRMRHILADIVIEGKRRGEFNEASSVKGTVEMFFALVEAGVFRLVVLGRK  
EATGLREALSPFVQSMRGPAGTQKM\*

>SPBDM4\_v1\_50705|ID:27159068| exported protein of unknown function [Uncultured spirochete bdmA 4]  
VQSEKKISSITRNKAARLVIAASFCIASFFLISSATLTFETRAFWNSKKNVSSILFSINI  
GDTDIYDDPILKLYTNAKTKNQVLKFFSAITNSERVAKAILDNSVEHNVRPSLAFAYV  
ESRYNPKARSKNSSGSLNSGLFQLNSSVFGMTSETLMYDPYHNAKLGLSHLEEYLNLSDD  
EFSALAAYNAGITRISEQGIPGMTFKYISDVSIMERKIMNLFVASMALNNAL\*

>SPBDM4\_v1\_50706|ID:27159069| Asparaginase/glutaminase [Uncultured spirochete bdmA 4]  
MNPESIRVIVTGGTFDKHYDEIKGELTFIDTHLPEILKLARVSLPVQVELNQLIDSLRMQ  
DENRRSVFESCARASEKHIIIHTGTDMAETARLIGQAGLDKTIVLTGAMIPYKILSDA  
LFNFGTAFSAVQLLPRGVYISMNGRIFNWDKVRKNKAQGIFEEI\*

>SPBDM4\_v1\_50707|ID:27159070| putative Transcriptional regulator, TetR family [Uncultured spirochete bdmA 4]  
MARVKTMEKRALILETAKRLFATRNFVSMASIAEEIGIPVGSYTYFDSKQALVETIIE  
EGWSEFRTWTEDGLKVSKTAERSDDAHAQSLKALSFLVNGALPRLFSDELIMLLLAEAG  
STAKLEEKLQYLAALIAELVSACMLPGVSHVDPEQYDTGITVLLGALETTRIASKTELK  
ISAADIQAFFKQTVENALGQPLPDM\*

>SPBDM4\_v1\_50708|ID:27159071| putative Nucleoside-diphosphate-sugar epimerase [Uncultured spirochete bdmA 4]  
MRVFVTGGFGNVGMSTVRALLSFGHDVCIFEHPSARSRQKRLRELLRDGRDKLRIFYGD  
ITDAGALSEAMACAGGPDAVIHLAGIIPPLADREPKLASHVNVGGTRALLEVCKLLDRPP

RVIFASSVALYGDRLANPWISIQDPVAPNDTYSVTKNECEALLRASGLEWVILRLSYVVS  
SDWLPFSPQLYDVPPTTRLEVHTEDAGRAFAKASDSTQSAGRIFNIGGGPGCRTTYRAY  
LDRMLRYFGLGSSSFLPDGLFAKGNFHCGWFTDSDAAESLLHFRSKTIEDYYSEVSWRMR  
AVRPLGSIWVAVKWPWIRSLSPYQAKAGRVRSPQFV\*

>SPBDM4\_v1\_50709|ID:27159072|alaS| Alanine--tRNA ligase [Uncultured spirochete bdmA 4]  
MITIHELRRKYIEFFRARGHAEISGKSLIPENDPTVLFTTAGMHPLVPYLLGEPHPAGR  
LTDYQKCI RTGDIDAVGDPSHLTLFEMLGNWSLGDYFKKEAIRWSYEFLTSPDYLGIDPE  
KLSVTVFAGEASIPRSESAEIWRSVGIPDERIYFLPREDNWWGPAGETGPCGPDTEMFV  
DTGLPACGPDCKPGCHCGKYFEIWNDFVMQYNKTSAGAYEPLAHPCVDTGMGIERTVAML  
QGKKSVEYETEAFTPILAVLESITGKKYAAPDNDPEVDRSFRIVADHIRAATFILGDPKAV  
LPSNIGAGYVLRRLIRRAVRHGRKLGIDGIFLAKPARAVIDIYRSPYPELVENSARILDE  
LEREEQKFLETQKGEHEFEKMLPNLLRNERIMSGRLAFRLYDTYGFPIELTEELAAEQ  
GLVVDRAGFDEAFKHKHQLS RAGSEQVFKGGLADHSEIATRYHSATHLLHKALRIVLGDH  
VAQKGSNITAERMRFDFSHAPMTREQIAEVERIVNEQIARDLPVTMEMMPLEDAKASGA  
IALFGEKEYEPIVKVYTMGDFSKEVCGGPHVARTGELGKFKIIKEQSSSAGVRRRIYAVLE\*

>SPBDM4\_v1\_50710|ID:27159073| protein of unknown function [Uncultured spirochete bdmA 4]  
MNIALRILHLHRALHYVPIEKPAHFDETALAKLASQFGECLLVFQKSAFFTMTGDGPRVS  
GNPEPDAAYRIA AQETPSPAGMGGQNSAGGAPFGFLAAGDYVFFQWHAWHETEKSARPS  
YAAMLEEVVREIWWQRLECEGPWFLRLVFEDDKVAVQALRALKKAP\*

>SPBDM4\_v1\_50711|ID:27159074| conserved protein of unknown function [Uncultured spirochete bdmA 4]  
MDYILDEVERFYKIIKLPFRRTPGVAFDILPMQFLPHIEGIDRVIHQRRALSPGSVGNV  
ERPWYMPHQEDNLIVLHGVRTVDIYTLERHRRVETFFVEPERIVHNGKVIFEGPAMVVWP  
THVFHRIVSGDEGSASLNFAVRLPGFDPETNFSIYDLNKTGTYREIRRGSLDQSGDV\*

>SPBDM4\_v1\_50712|ID:27159075|dxs| 1-deoxy-D-xylulose-5-phosphate synthase [Uncultured spirochete bdmA 4]  
MSLLDRISGPADLQGLSISELHRLAEEIRLRIETVQRNGGHLASNLGVVELTIALHRVF  
DSPVDAIVWDVGHQCYPHKILTGRAVRFGLRRKGGISGFPKRQESEQDIFDTGHSSTAI  
SSALGLLQARMCTGQKGRVIAVVGDGALTSGLAMEGLSNAGQLSLPLILINDNRMSISR  
SVGSISRYLSKLSASVRYQSFRTVDAAVLRIPRIGNLLFSLINRGKRAIKAIFFKENLF  
VDYGFYVVGPIEGHNITALIDAFHRELNRPVVVHVVTKKGKGLGKAEEDPESFHGLGP  
SCPDIPGPGTTSHGESFTTSFADALVRIAQQDHRVVAVTAAMGSGTGVAKLAERWPRRVF  
DVGIAEQHAVAFAGLAQGGLRPVVAIYSTFMQRAVDQVFQEV ALAKLPVLFALDRAGAV  
GEDGETHQGIYDIAIFKSLPNLVLFAPADSEEVSAFMDFALGLDVPCMMRYPKAYSPCPS  
PQPMLPLELGKGFMRKCAGAKVLVLA VGPLAYTAAEASDRLEKAGLSVDVYNVRFSSI  
DENYLATLCAQYEGLVIMEDGVRTGGFGESVAAILAERGVNVKITACGFERNPLDQASRD  
ELLARAGLDAKGIQKVLSEMLQSLEPSPQQVASTPGVARIGPRAVS GEVQHVR\*

>SPBDM4\_v1\_50713|ID:27159076|folP| Dihydropteroate synthase [Uncultured spirochete bdmA 4]  
MSGSGAPAAATEKPQRLLKLPRGRTLDLGGPLPDDLPCIMGIVNVNQDSFFEGSREPDTGSA  
VKAALDMVGQGAHIIDFGAESTRPGSTEIEVKDELARILPVIESFRAVSDAVISVDTRHP  
EVAAA VLGAGADIINDIEALARTGMAEIAARSQAAVVLMMHQGTPQTMQCVPSYANCLGE  
VFSFLEGASNRAL EAGIDREAIILDPGIGFGKLEHNLALLKGIDRLKTLGYPVLVGVSR  
KRLIGELTGKDVQERLAGSLGAALAAWLNGADILRVHDVSQTVDALRVFREVRQ\*

>SPBDM4\_v1\_50714|ID:27159077| conserved membrane protein of unknown function [Uncultured spirochete bdmA 4]  
MNASSLLNFLT TYVRPVLVDV GILAF LIYQAYQLL VMTEAVYLIRGILILVVVYGAAFFLN  
LSTVTWIMNILAPGLV VSLAILQPELRRIFIQLGRQSIIRKKN AARTSWIDAAVSATVY  
LSGKRRGALIVIARKVGLSSYIEKGIPLDAIISTLLISVFEHDNPLHDGAAIISQGRLA  
AAGCFLPLSDQQDIRKTFGSRHRAALGIAEESDAVVLIASEETGALSLSYDSKLYYDLSP  
DEVLERLRTLSENGVSSQTGEVDNEP\*

>SPBDM4\_v1\_50715|ID:27159078| putative YbbR family protein [Uncultured spirochete bdmA 4]  
MNLDSRISKLL ENWPAKVISLVVAIFIMFLYNLTRL DQRLITVPLNISEGRSYVPATEY P  
KTVRVTIRGDRDQIYRIREADIVASLDLTRYESEGVFRVPVKLERRGDARDIDPLELRAD  
PAEIPISFERLA AKRVAISPTFKGFLEQGYELNSYEIVPPEIAIEGPTSLINGTKDISTD  
VIELSGKTGDFSLTVPLVKPSDLINLIDVNTVRFTARIQKQERRITLNNVPIKAVNLDP A  
LGFAETMPTGKMTLLPRQQQDMATATNALLEADFKDITKPGQYSIPLTPIPPEGFDVEAY

DPLVITVRLRIAPAPASNSSGGAGLQGNQAQGSTSQPVVV\*

>SPBDM4\_v1\_50716|ID:27159079|acpS| Holo-[acyl-carrier-protein] synthase [Uncultured spirochete bdmA 4]  
MISGIGIDIVHVDRIIRRWVENPSILERRFFHPAEIETARSRNKGMAISLAARFAAKEAFGK  
ALGTGLAHFALREVAVVNDLGRPHLQLEGSARREFERHGGGTIIHVSMTHEGDNAVAVVI  
LEKGN\*

>SPBDM4\_v1\_50717|ID:27159080| tRNA pseudouridine synthase A (modular protein) [Uncultured spirochete bdmA 4]

MQRESSGRTQPPSQRETSGQERVYSEDPSTSRARADFSKSSVRAVKLVLAYDGSDFSGW  
QRQKNGRSVQEELEKALAKMHGHEIRVTGAGRTDAGVHAMGQVAGFYTDIKSIAADRFV  
ALNKLMPRDVRLSSEEAPPDFHARFDASLRRYRYFLLCGGTPDPFALRYAHSLSYYPRV  
AVLNAMA AVVLGEHDFSTFASAQDASESRSRHISESIFFFERERLVYQVAGNAFLWRQVR  
SLVGTFLERIAESSAHGEALMREMLESRDRGRAGTTAPACGLFLWNVEYGERIHGHTR  
RRGGAEGSGGRRSESSKSDTRARTTEAEPNPASGGSRLLVPGLGWIDEGE\*

>SPBDM4\_v1\_50718|ID:27159081| Pseudouridine synthase [Uncultured spirochete bdmA 4]

MKANKKRNASPESPAGISATSSHSFWEGVASPPEPMRADRYLSEILKLMTRSOLKARNAR  
LFCNGKEVKLSHKLKHDSDLSEWTEEPPEIIVPEPVPLKILYQDDGVFVIDKPPQGMVTH  
PAAGNWHGTLANGVLWLSGGSRPVSESQELLVPPHPPRAGIVHRLDKDTSGVIIIVARTAS  
AHEFLSRQFRDRQVRKEYFAIVRGRPPASEGRIDTWLARSRDRKKFAVSQPGRGKHALT  
LYKIRAVWNLSAANANGSPSAAASGPGARHRASGSKASAKSATYSLALYPKTGRTHQLR  
VHCAHIGCPILGDPIYSKKDTLFPDATLMLHARRLKIRLPSRSEPSVFKAPVPKRFRDMI  
TLLNTGI\*

>SPBDM4\_v1\_50719|ID:27159082|rbpE| putative RNA-binding protein RbpE [Uncultured spirochete bdmA 4]

MSKKIYVGNMNYNTSERQLQDLFAQYGDVTTVNIIVDRFTGKAKGFGFVEMENPEAADAA  
IAALNGQEFMGRQLRVNEAQEKPRYEREESGGGYRGRY\*

>SPBDM4\_v1\_50720|ID:27159083| protein of unknown function [Uncultured spirochete bdmA 4]

MHCFSFRSTGQLKAADAHAGFSPLRFSFGKTNNNQNSTLISPLKTVGVVLCFLVIASDSP  
\*

>SPBDM4\_v1\_50721|ID:27159084|rny| Ribonuclease Y [Uncultured spirochete bdmA 4]

MTPFVWYIVLPLAGLCLGWMIRWLYARFQLSSAERESERVLQDAVKEAEAKKKEILVEAK  
DQIIRERNQKEKIRDRRIELQKYERRVLLKEENLDAKLASIERIEANLKNRENSIAEKE  
AYLAGQEERYTAELERVSGFTADEAKKLIQNMEEARRDAQVLINKIDQEAQLTAEKKA  
KDLVITTIQRIATESTAESTVSSVSLPSDEMKGRIIGREGRNIRTLETLTGVDIIDTTP  
EAVVISCFDPIQREIAKISLERLIADGRIHPARIEEMVQKVTREITQKLYDEGEKVVFDL  
GLHNMAPELIRAVGRLYYRTSYGQNVLMHSKEVAVIAGLLAAELGLNREIAKRGALLHDI  
GKGIVTDSKDNHAEIGTEIAKKFGEDARIINAIASHHNDVEPNCPEVIVQIADAISAAR  
PGARRETLENYIKRLEDLEAVAESFSGVEKAFAIQAGRELRIIVNNEQISDDQAKELCKN  
IAKKIESDLRYPGRIKVTIIRETRIVEYAR\*

>SPBDM4\_v1\_50722|ID:27159085| conserved protein of unknown function [Uncultured spirochete bdmA 4]

MSAGTANVLMIGDVVGGAPGLRALFTFLPSLIKRTADLVVANGENALKGFVIGADEIAAM  
RSYGVDVITSGNQVWEHKEAPELLEAEQSLLRPANYPKGLPGRGTAYIEGGGAPGQPAPT  
RACGASGRFEWL VVNLQGRREL YDIDCPFVKADQILATAAREHPNALIIVDFHAESNEEK  
EALAWHVDGRAAVLAGTHTHVPTADERILPKGTGYLTDLGMTGPVDSVIGMNGDICIRRF  
LTQIPYKMETAEGSAAIMGALFRLDPESRRCVSIHIFESL\*

>SPBDM4\_v1\_50723|ID:27159086| protein of unknown function [Uncultured spirochete bdmA 4]

VARAPFVFFRRGHKVYVQFWNDEKAGYGTARSTGMVTENEALKVVMEWMKAGDPPLARRS  
IKRKSQFQMTACGYLSDFWKAGSPYVLGKQARGATLLACLCGFRLGEVRGLQWEDVDFAN  
STIRLCHNLPNSERAAEGLKSPKWGSSREVPAPD\*

>SPBDM4\_v1\_50724|ID:27159087| protein of unknown function [Uncultured spirochete bdmA 4]

MFPKAAQKSFESMLRSIGITEEMQKARRIVFHSRHTFISLSRGAGVPDFVQRIAGHKT  
MNMTNRYSHASEEDIKNAKLLIEKMFHEARGQCSR\*

>SPBDM4\_v1\_50725|ID:27159088| conserved protein of unknown function [Uncultured spirochete bdmA 4]

MAGELAMGEKELIRAKVMEQVVQQQLTLKEAEKLRECHGIEIDHETLRRWLRAAGLWERE  
RRGSPCCLMNMVDDATGITFSFFCEEETTSAMRLLWRWIEQYGIPQALYCDKKNFVLT  
REPTIAEQQLERNHGVYQDRLIKELRLAGISTIEATRFLREVLYLPKINTKFAKTPAQPED

AHVPLIHPTSLEDILCYETPRVVSNDYVVSYKCRPLQMQRHNRLPTPKAQVTVRELLDG  
RIKLLYHERELEYVELEKPFKEELASRSA\*

>SPBDM4\_v1\_50726|ID:27159089| protein of unknown function [Uncultured spirochete bdmA 4]  
MDRYSIKEIAEILKIHPKAAKSRLHRAGILPVSYVVGQAALYSPDAIEAIRVVRGRGRPKQ  
NKKQSQGC\*

>SPBDM4\_v1\_50727|ID:27159090| protein of unknown function [Uncultured spirochete bdmA 4]  
MTDSQVLMASRTVDPRLLEFDEEDFIAFAAPFLRHGWRLAAGHNSYNHYLRVGEKPYYSH  
AVLLFRMNYGVVQYRILDDDQNGANSIPKKITIQTKDERDKYYNGYSCGYLFAHFATVFP  
GVKPVKGEQQLYGIKPDGKGEKWPEDDVSEETITKVIAGGRKYAESNFEA\*

>SPBDM4\_v1\_50728|ID:27159091| protein of unknown function [Uncultured spirochete bdmA 4]  
MPKVTSKPEKGLDVNFFAAFDELKSKMYGDDVAFKPLQDAVAIIRTRREKGEETEEERER  
VRYLIGIVFRNSLPLRAGT\*

>SPBDM4\_v1\_50729|ID:27159092| putative cytosolic protein [Uncultured spirochete bdmA 4]  
VNYVVRISKQADKTIKAPRAIQKQFALLIDDLEKYGPIRKDWPNFSPGLNDLYHCHVSY  
SWVAVWRNEKGTVLVEVEYAGSREKAPY\*

>SPBDM4\_v1\_50730|ID:27159093| protein of unknown function [Uncultured spirochete bdmA 4]  
MPVAEKKRHIKSQRKLISVSAKEASTILAYAKKKDPQAHIVVSESNATDAVLPADSKWYQ  
EVKASWHPGVTLRIRRENAGLTQAQLADMTGIAIANISAYENGRRTMGLSVAKRLAEALK  
RPVSEFVEPESTKA\*

>SPBDM4\_v1\_50731|ID:27159094| protein of unknown function [Uncultured spirochete bdmA 4]  
MAFKVMIEDNNHLGFNDNHPYSAGVFTAEEAITICEAIVNDFLTKSLYPGERAKELV  
KQYYTYGEDPYIDGTEGDVKVQGFSGWGFAEERSVILCTKDNPNLRRVEVTKTP\*

>SPBDM4\_v1\_50732|ID:27159095| conserved exported protein of unknown function [Uncultured spirochete bdmA 4]  
MRISERLLRKNLWQEAIFLSLFFLSILATAAPQDLMSHLAGNYSTETPNPLFADGSLGIS  
YHNGPFGLTWDITADNRGTYVPIASSVSNPFLDIRNAGFTYDAGSLSLFLGKLPVKDEI  
ESPYSLFLSGASPSLMTGGFRYHSGVFSFSDRWIGLNRNIRSGLYQTSIQNIYRDRGAVL  
KSYTFDAGPVRIGYQDATIFPGSYFDVDIFANPVQSTLVQAVLTAAGQPSSRSNGYNSLM  
GFFGEYRGEWGMFQMLMIDFNLNRFNPTSYPNPKLAWSLGCNVALDRGKLGIIYTAG  
ATRYTFESTSWEFYSYTLYPGSAIISGGEPIAIPQDQMLGYINGENLAFMATWSMPIK  
QMNLETGLECVLSGSKSPTNPWHNGEAWASLGTQLLNDPVLNIKLLFNARISRTWGDMTL  
LVRTTGGYVFNRLNPVYPGDPGSPFAVITDDGKEMHEPVFVPAAGDSGFVVEVSVGGIWN  
IGD\*

>SPBDM4\_v1\_50733|ID:27159096|araD| L-ribulose-5-phosphate 4-epimerase [Uncultured spirochete bdmA 4]  
MSETARELENLRDVLAAANLELFRLLGLALFTWGNASAIADRERGLVVIKPSGVPYDTMRPE  
DMVVVDLEGRHVDGALKPSSDLPTHVLVYKVFPLAAGIVHHTHSTHATAWAQAGLDLSAEG  
TTHADHFYGPVPCRCLSDAEIAGDYERETGNVIAETFRNRNIDPASVPAVLVHSHGPF  
WGSSALDAVHNAAVLEEVAKIILSRMACMASKDAPPPMQQSLVRHFERKHGKDAYYGQ  
K\*

>SPBDM4\_v1\_50734|ID:27159097|araA| L-arabinose isomerase [Uncultured spirochete bdmA 4]  
MKTYTSHKFWFIVGSQLMYGPEVLEQVRAHAKIMTDFFNQSDAVPAPVIQPGIATSPENI  
VALFRKANADPECAGIITWMHTFSPSKMWFQGLVENTRPLLHLHTQFNRDIPWDSIDMDF  
MNLNQSAHGDREHGFIHARLGTARKVVVGYWQDPEVLARIGAWMRAAVAFADGKAMRVAR  
LGDNMREVAVTDGNKVSAQIQFGWQVNGYGVYEVAKRLSSVTQKEVDSVIREYEARIDIA  
EEVRENEGAMRKVREQAAIELALRRFLADTGAGAFITTFEDLEGLPQLPGLAVQRLMEDG  
FGFGAEGDWKTAALVRAMKVMGRGLPGGTSFMEDYTYHLEPENEMVLGAHMLEVCPISIAA  
ARPRIEVHPLSIGGKDDPARLVFDAQPGMAVAATVLDLGDSEFRLVANEVEAVPLPHSMPK  
LPVARALWKPQPDFKGALELWLIAGGAHHTSFSYAVTTEMLEDWARMAGIECLVIGRQTS  
VPEMRRQLERARLQFQR\*

>SPBDM4\_v1\_50735|ID:27159098|araB| L-ribulokinase [Uncultured spirochete bdmA 4]  
MTDITTKQYVIGIDYGTDS CRAVVTDAQDGREIASAVAQYPRWGEGRYCNASNNQFRQHPQ  
DYIDSLVAVMDEIAGKTGTEVLPFIKGIADTTGSTPCLVTARVEPLAMLPEFADNPAM  
FMLWKDHTATDEAFEINALAHKWKIDFTMYEGGVYSSEWFWAKLLHIARTAPEVMRAGVS  
AIEHCDWMPALLTGIRLLGGIKRSRCAMGHKAMWHESFGGYPSDEFLAQLHPELARIKKT  
LGTETWTSDFKAFGNLTTEWAERLHLAPGLPVAVGAYDAHMGAVGGGVPEPGVFIKVMGTST



CDMIVGPGSAGTEHLVKGICGQVDGSIIPGMLGYEAGQS AFGDVYAWFKDLLMWPFEHVL  
PKDSLPESEYREETASALMPALEKAASSIEPGASGPLALDWLNGRRTPDANQKLKGAIGL  
TLGTTAPMIYRALIEATAFGARAIVERFVQENIDIKKIRAIGGVARKSPLVMQIVADV LG  
KPIEIVASDQSV ALGAAMFAAVVADIYASVPEAQAAMRPAIEAVIPPEPGHVEVYNRLYQ  
DYQKLGAFIERELT\*

>SPBDM4\_v1\_50736|ID:27159099|rbsA| fused D-ribose transporter subunits of ABC superfamily: ATP-binding components [Uncultured spirochete bdmA 4]

MAEPLLQLNRICKSFPGVRALDDVDFSIQEGEVVGLLGENGAGKSTLVKIISGVYMPDSG  
DMLWRGNKLNKSIMDAQERGITIFQELNNCPNLSALENLFLGREIHSKAGMVD FRTMK  
KKAEEIFS YLGVQIPLNIPVGKLSIALQQMVEIGKALLTKAKLIIMDEPTSSLTERETQK  
LFQIIKELKAQNITVIFISHKLEEVFEVTDRLVVLDRDGRRVGELETKSATRDALVSLMVG  
REIHSFFSSRTKAAETDVLLKIEDFSGPPNVSGVSFDLHRGEILGLAGLIGAGRTELALL  
MFGAEQKTSGRIFLQRKEIQVRSPWQAIENGIAYLSEDRKTKSLILPMMVRENITMSIHS  
TLSGFLGTLNRKKEREIADSFVRLLEIKTSGLEQVNNLSGGNQKQVVIKWLATKPSIL  
ILDEPTRGIDVHAKAEIHKLITDLADKGTSHLISSELPEVVALSDRVLVMHEGKIRKVL  
DKPEISQENIMGAVFAS\*

>SPBDM4\_v1\_50737|ID:27159100|rbsC| D-ribose transporter subunit ; membrane component of ABC superfamily [Uncultured spirochete bdmA 4]

MAREQKSFVAKLFSYRESAIFLALILLMAAVTIFAPNFMMSGSNLYLVSRQISFVAIVAYG  
ELFVILTGGIDLSVGSIMGLSGVISALAMASQLPIWLSVLLGLLTGACGLLNGLLISYV  
RIAPFIVTLGMLSFARGIILITKGWPVTNIPKPF LAVGQGDLLALPIPVMVIVLGVAA  
HFVLSKTTFGRRTYAIGGNEQATFLSGINVKKIKVFLYMVSGAMAAVVGIILVARFN SAQ  
ADTGSGWELDAIAAAVIGGTSLSGGSGSILGVIIGAAIMGVIRNGLVLMRVSA YWQTAVI  
GVIIVLA AVLDR LKNK\*

>SPBDM4\_v1\_50738|ID:27159101| Periplasmic binding protein/LacI transcriptional regulator [Uncultured spirochete bdmA 4]

MKKLLVFLALTVLLPFGAFAQKKPVFVMVPKGVHPY YEP CYEGFKAAA AKYGVIVEKVD  
PQKFELPLQVKVIEDLIARRVDGIAISALDDAGLVPVIADAMKAGIKVITFDAPAPSSAA  
LTYIGTDNETAGYEAGKKMADLMNKEGEIII LQGG LG AANLNLR TKGFKRAISEA APKIK  
VLDVVDVQGDFAVATNKTEAILQTYPNLKAIFAVSAEGAPAAANVLKQQKKAGKIILAGF  
DDLKDTLEGIKDGSVSFCLVQKTYKMGWLSVEKLLDAMNGKPIPKVIDTGVLVFTKGNVN  
SYMDEM KKEFAQ\*

>SPBDM4\_v1\_50739|ID:27159102| Transcriptional regulator, LacI family [Uncultured spirochete bdmA 4]

MTVREIAEKAGVSIGTVDRVLHNRGRVSPKTKASILAIEQSGYTPNPIARHLKLNKKYP  
FAVIMPVSDSDSGYWRIACAGIQKAQKELAAFGVSVKRFEFNRYVRASFAKAMASFDPMQ  
FAGLLIAPVIPDETTALLSRLPANYPVVFFDAQIPTFKPLTRIGQNA YQSGLLAGR LLEA  
FSSRSGPYVIVGTHSEDYHIRRRIEGFNAYFEHLAYEVHLRECFDIEHREKREHFTRLLL  
QEFSSIDGVFVTNASVHGIAADLNRRPGQKHITVVG YDLPENIRQIEARTIDCIISQRQ  
EQGGYQGIYQLYRSVVLGQSVEPEIEMPIDIHLRENLP TESHGETQKAEVHVSKHSESSL  
CEEA\*

>SPBDM4\_v1\_50740|ID:27159103| putative Sugar transferase [Uncultured spirochete bdmA 4]

MPQNLKRRQFFMVFVDVVLMYLALVLALVVRKGTLLSSDYLWEHVIHFTPVFAIWVVIFY  
ILGFYRLDRTFNNTYNLKLFI SGLLVAGLASVISFYINPNAYIAPKLLL VLLLIYGLLL  
WTWRYLYEKLWSQNHKYRVGVGFIGVTQEVGQVIRELNRHTLVGH DARFIYSEDPHVQTL  
DDNLPLIRDSGMIRTTVEKTNADLIVIAAGQKELSELIRELYGLLDMKVRFMRLPDFYE  
MIFRRVPINAINESWFLENIDLRAAVPYETIKGIFDRILALILLICLPFIPFIALGIKL  
ESKGPVFFKQERMGRNGKPFMMIKYRTMRVEGNDFSPTEKDDGRITRLGSFMRA TRIDET  
PQVLNILKGDMSFIGRPERPEIARKLAEAI PYYQQRHLLKPGVTGWDQVCGEYHSPSIA  
DTK KKLQYDLYLKNISFSLDVSIFS KTIMTMLRRKGR\*

>SPBDM4\_v1\_50741|ID:27159104| conserved protein of unknown function [Uncultured spirochete bdmA 4]

VRILHVVTNADLGGAPRVVTELANRAVRDGHICAAASVPAGPFWAHL DPRVERMPLRHLR  
RELHPVQDPSAVLELVRLFRRWKPDIVHLHSSKASVLGRFAALLANFP AIRRIPTVYTIH  
GFD TILKTHRKFLPLERIMARITSAIVPVSA YDRRNLEEAGIHGNVRLIHNGASDRFGMT  
PDP AVTERIGVARTEGATIVLSIARLEAPKRFDLFLEVARAFAGTGAGQPADSAAKVAFF

WIGNVQSIDQTSPPNVEMLGEVPEAGNCINLCDVFLLLSDYEGLPMSVLEALSCGKPIV  
ASDVGGIGEAVGVAGGTEAGILVPNERSAASMATARLVGDPDLRARLGASARRRYEQGFS  
ADSMWQAYLRLYMGLR\*

>SPBDM4\_v1\_50742|ID:27159105| Glycosyltransferase, family 11 [Uncultured spirochete bdmA 4]  
MKIVKVAGGLGNQMFQYAFARALEERTGDEVYLDLSTYEYMPAHNGFELDRLFAIQYRAA  
RKEDVERLATHPRNSLSQIRRYFTKRTHHIDRVFRYDPSVFELKGDLYFEGWWQSEKYF  
APFAESLREEFRLVGNPGERNRRLVETMADIGAGSGKEGEVACTDKSHFVSVHVRRGDSL  
RLPETQVCTETYYRNAFSLVRERIERPHFLVFSDDLPCRAHFGLDAAEVSFVDWNRGSD  
SWRDMWLMSRCRSHIIANSSFSWWGAWLDPCLGKLVVAPERWSLASPGRFAYYRYDFGDI  
VPETWVKVPLH\*

>SPBDM4\_v1\_50743|ID:27159106| conserved protein of unknown function [Uncultured spirochete bdmA 4]  
VVAEYDLVCAIERDLPVLEIAIPYMWRFDPRLVLIASSPCLDRFSTKYHDAEHKND  
LCLVDEKVPGLTLNYVRSLLAARGANPARGGWYFQQLKLCYSLNSMADDYYLVWDAD  
TIPLRPMDFDETGRVFLEKSSEFNPSYFTTMKRLIGLDKSKPYSFISEHMMFEKTVVVQ  
LLALVCGQDGPSTGKVAERIISAIDVGPLNASGFSEFETYGTVMESHFSEHYLVRALPSQ  
RQGVLIYGRQPKPQDLFALSRRYYWASFEAWPVTSVKTRVKRFAWSALGSVEAWAARRLD  
SHMYKEFLDITKKDEA\*

>SPBDM4\_v1\_50744|ID:27159107| conserved protein of unknown function [Uncultured spirochete bdmA 4]  
MKTFFVISLSGDDVRRSFMRRQLDALGIDYEFFDAIRGSERIGDLRWYDDVSVHLEGRSL  
RPGEVGCALSHAAVYAEIVKRGLNVALILEDGLLHQDLQVLSTIEQGAGAQQQLISLS  
RCDAYLPWASKNLAGEFRLVTPILIKEGSIAQTVGYVISLKAACAIAKINIPVKFPADSW  
GYYRGIVEFKGVIPTLTLVTQNVDLGSTTLESGRQVFTPYSIKDLLLHGFTTYNSFGRF  
LKRSKHLFGS\*

>SPBDM4\_v1\_50745|ID:27159108| putative Glycosyl transferase group 1 [Uncultured spirochete bdmA 4]  
MQRKHIVRVFIPGIFAYIGGAEKYTATIVQYLVNAYRNLDIGIVSYRHNGAGKANDIAIL  
NENYDLALPPAIKTILLDDEGKGIWGRFIAHQRLRNTSHNVLDLYMNCFHNVQFFKAAKNV  
HIVHFPAQRRLVLSPTFGGKPLLKPLADALDGKYKDCYDLFICNSRFSESWLQYEWGIEP  
ERRAVLYPPVAHDATWSPDLYDQKKNILLVSRFDPRKNMLEAVEYFVTNENRFSAWRLV  
VAGSCSDNDKEYYNRVALASRGHRVDIRPNLPKPELDELQYGASIFWHAMGLATDENS  
CP  
IEVEHFGITTVEAMSAGAVPVVIDKGGQREVVDGNGFRWRTLDELGNVTQKLIADPAL  
RRALAVSAVEKSNTYSLEAFYHAIDAIFMEHRLIPEEYRK\*

>SPBDM4\_v1\_50746|ID:27159109| putative Glycosyltransferase group 1 family protein [Uncultured spirochete bdmA 4]  
VMEKLLFVGLPEHKRTASFEFFTQLENTYQIEYTKITIDKNWTNTTYAYNRIIFWQRLP  
PPEHLRAVSPTSVVYVPMYDEARNYNRQVIRTWAPFKIISFCRSIHEDLTAWGFNSKYVQ  
YFPKPMVEAPLPLAVHKAFFWKREGSYINEAIPDAMIPLLLHDSGMKLYHSETKPVCEK  
EFEDMVASRSSWLSKEEMISLLRECSLYIAPRESEGIGMSFLDAMANGLAVAGADNPTM  
NEYISDGQNGYLFDLMKPLPINLENLQQVREKSLESCQAGYEKWEKEKWSLIDFIEEPH  
SSLLVQVPRGFEYRSLKQKSMSFRAKRLVKRLAGK\*

>SPBDM4\_v1\_50747|ID:27159110| protein of unknown function [Uncultured spirochete bdmA 4]  
MRLKRIFA VFVKTPFKFIPLAAVALNAGENKLFAPFRWKILQLLEREGKVGRKHGCRPS  
VYRYWQKRYQIENQHAVAESLEYLNKTTASPSFAYIVEPEANFFATCSTINSLRHQSYKN  
IEIIRNNA TRPLRSLLQNVAGNMAHIVGKNENIKAYLDKASFVLDISPGDKLSQQALL  
EIGLYMERSDRSWDIA YFDEDVQSSFGRCRFPFFKPDYSPLYNSKVNYISGACVYKAGLF  
PPWKDKCLKDDICLQIPESLRREKILHIPEVLLHKREPRAISSMGKKDYQYLIINQADSA  
KDNALVSIPIKDNVSYLNQCISILDKSQSDQVQIIVVNNKSEKQETLDYLKKLSEND  
RFRILEYPYDFNYSAINFAAREAEGQYL VFLNNDTTIISAEWLKHMKYWLSKPLIGCVG  
VKLLYSDQTIQHVGIIVGASMGACHYVGDLDQEDYGYFGINTFPREVS AVTAACMGVRKD  
NFVNVGGFDEKIPVAFNDIELCLRMMNAGYVNILDPRIQLFHYESRTRGRDDIFKLTRD  
RKERNCLVKNMSTDIRFDAYNPNLSLNNTYCLSFPPRTVSMIKSYEMKLRLLVVLVGS  
I  
QRYGSALEAIMKEHERLLKGQGYSIWGVDIKCNVTTKGDTPFHLVKNEWDAMDMIRKMS  
TAYVIVYSEPYQKIAWMPREIKVFYFHGKTGWTEQKGTMMELSVLDREAAETYAYPIVS  
IEFFAHTRSC\*

>SPBDM4\_v1\_50748|ID:27159111| rmlB| dTDP-glucose 4,6 dehydratase, NAD(P)-binding [Uncultured spirochete

bdmA 4]

MRLSSILVTGGYGFIGNFIRYFFDQPDLSKIVNLDALTYAGNPENLKDIA SQY PDRY  
FFEKGDIRDRLVESTFRKYSIDTVVHFAAESHVDRSISGPEAFISTNVLTFTLLDVAR  
TFWKEKFGDAWESKVLFFHVSTDEVYGS LGDTGYFREDTAYDPHSPYSASKAASDHLAMA  
YHYTYGMPITLSNCSNNYGPYQFPEKLIPLMILNMLEGRPLPVYGDGKNIRDWLYVEDHN  
AALWLILQKGSKEKYNIGGENEWENIHLVQRLIDLVTEESGIRQRDIDNLIVYVQDRPG  
HDRRYAIDCSKIKTELGWKQSTFDEGLRKTVRWYLTNKEWCDRVRSGEYQRWIEENYRK  
RV\*

>SPBDM4\_v1\_50749|ID:27159112|rmlD| dTDP-4-dehydroorhamnose reductase [Uncultured spirochete bdmA 4]  
VIWIVGNKGM LGSELSQILENRGIECVGTDKDVLDLDPMALVAF AANKDISLIVNCAAYT  
AVDKAENEESLALRLNAEGPANLAALAVKRHAGFIHISTDYVFDGEGSVPYKENDPVAPL  
GAYGRTKAEGEKRIQAIDPDAIIRTAWLYGQYGKNFVSTMLGLMNGKSELSV VADQYGS  
PTWAHDLAEAICAIADRTAPTAGIYHFTGEGTTTWYEFACEIQRLGLEFGVLTTPCKVKA  
ITTDLYPTKAKRPAYSVLAKDKIKEAFGIYPPEWRDSL RKYFESIYQVKTGGEG\*

>SPBDM4\_v1\_50750|ID:27159113|rmlC| dTDP-4-deoxyrhamnose-3,5-epimerase [Uncultured spirochete bdmA 4]  
MAFKFNETPIRGLMVVEPRAFTDDRGGFFMESYKASDFISAGIT AQFVQDNHSRSCYGLR  
GLHFQKAPHAQGKLV RVTQGKAWDVAVDLRAESSTFGKWHAVELSAENKLLFWIPEGFAH  
GFVALENGTELQYKCTSEYAPESDLGIWNDPELAVEWPIKDVILSEKDMKLQSFAAYKR  
TIQ\*

>SPBDM4\_v1\_50751|ID:27159114|rmlA| dTDP-glucose pyrophosphorylase (glucose-1-phosphate  
thymidyltransferase) [Uncultured spirochete bdmA 4]  
MKGILAGGAGTRLYPLTYAVSKQMLPVYDKPMIYYPLSALMLANVQEVLII STPRDVPA  
FRQLLGSGDRLGMKFQYAVQTYPRGLADAFIIGEDFIGEENIALVLGDNIFYGQGF GKSL  
ERAGSIVEGAAIFGYVVKDPSSYGVVEVDKNGNAISIEEKPKPKSHYAVPGIYFYDNEV  
VNIARGVKPSSRGELEITSVNNEYLARGKLVHVELLGRGMAWLDAGSYDGLLEASNFVEAI  
QKRQALYVACLEEIAFRKGWISRRERLLESASEIHTDYGLYLKYIAESD\*

>SPBDM4\_v1\_50752|ID:27159115| conserved protein of unknown function [Uncultured spirochete bdmA 4]  
MNFASIRQTISIFIKSPGKFRIVRKGISALVKEGIPGLKKGKIDFYERLSSVHTDEA  
KVQQFFYSQQNQFSKNSMGEMETHFKDSPLISIIMPT YNTSERCLRLAIESVIRQIYENW  
ELCIVDNGSSKSEVYNVLESYSKKDPTRIKVKFLSINTGISTASNIALEMASGSYVALLD  
HDELTPDALFWVVK EINDFPESDFIYSDECKIDNTEERKLFHFFFKPEWSP ELLNGMY  
TGHLTVYRTSVINEAGAFRSKYDFSQDYDLALRISEKAKTIRHIERILYLWRSVPGSAAQ  
DGKPWARISNLDALKDTMKRRNIDSYILPYPYTNRVKIR RATNAKVSIIPSDSLRNLYD  
SINLLAKTAYVNYEIVVTNSVLIEKLEQWRPFQHIFVPY NKNFNFSDKCN EGAKHA  
FGKILVFLNDDVFP RDESWIENLIEYLQLDIGAVSPKLIYEDGIIQYAGMFV GAGPFGV  
TAYSGYYENEVDEFNTLHRWVRDVSILSGACFAIKKSIFDELGGFDPDNTPNGHSDVDLS  
FRVREKGLRIVYTPYVILHKGNSWHEADKCTRPIYLMKRWADYLISDPYFTNSMKKF  
IYRDFPYEFKFFGKRIKEKSKRNILLV SHEMA SETGAPLVLLYLARIIRGNGDYPV FVSP  
DGV MRRNLYNEG FHVIIQN IYGN D L LFKKFAENFDLIANTLLSLPVVRQLSGMRIVWW  
LHEGEFALNNYVEINKNVISDMKNLGNNSNLQILCVSEYSKEIFTKRVGFNC DQIFAFGI  
PDRRPDLRKKQHSDIRFIMAGSIEKRKGQDIFVTAIAQIPVVIRRNARFV IIGNSLDAQY  
YQDLIVKTADIDEIVVENALPHLKLMEFEDSDVIICPSRDEPFSITLLEGMMLSKACIC  
SNKTGIANYIKSEDCGWVFDVNTPEELTEIMNNIIMGKENLEEKGKNGRKYVEENFTMEC  
FKKRALKQLSAVEDHNNSVQPENKLSLDCLGE\*

>SPBDM4\_v1\_50753|ID:27159116| O-antigen export system ATP-binding protein RfbB (fragment) [Uncultured  
spirochete bdmA 4]  
MNTVVKVEHLSKEYRLGVINGSLWKDIQSWNAKLQ GKPD PWTRINEESRIGKRDHFWAL  
KDVSFEVQRGERLGIIGRNGAGKSTLLKILSQITAPTEGTVKMRGHVASLLEVGTGFHPE  
FTGRENIYLN GAILGMSKTDIDRNDFEIVAFSEIEPEFIDTPVKRYSSGMYVRLAF AVAA  
HLDSEILIADEVLA VGDVKFQEKCLGKMKDVSENEGRTILFVSHSMGAVKKLCQMGV LLE  
HGEITAQ GKIDDVASSYERLLNN\*

>SPBDM4\_v1\_50754|ID:27159117| ABC-2 type transporter [Uncultured spirochete bdmA 4]  
MTSTDNETWDVVITAKRKWLGLDIKELRQYKDLVNL MIRREFVSVYKQTI FGPLWFIFQP  
LLSTFLYMFVFGNIAQMGTDSIPQPLFYFSGTMLWTF FATT LQKCSDTFVNNAGLFGKIY

FPRFTMPIAYVANAFFTLCIQFVVMVAFYIYLLNGVQFTISWWILATPLYIVQLALLGT  
GFGIMTSALTTKYHDLRNLVTFGLSVLMYATPVVYPVSSIIKWKLLFQFNPVTPVIEMF  
RYSFFGKGSCLNMWAYSLMVSIVFLIGLMTFNHNEQTFVDVI\*

>SPBDM4\_v1\_50755|ID:27159118|fcl| bifunctional GDP-fucose synthetase: GDP-4-dehydro-6-deoxy-D-mannose  
epimerase and GDP-4-dehydro-6-L-deoxygalactose reductase [Uncultured spirochete bdmA 4]  
MNTHDKIYVAGHRGLVGSIAVRRLLKAGGYDNIIVLGHAEIDLTRQAEVEAFFEREEDYV  
FLAAARVGGIGANSYYPAEFFYENMAIALNVINASWKNVKKLLNLGSSCIYPKMAPQPL  
KEEYLLTGPLEPTNEGYAVAKIASIKMCAYYNKEFGTNYISLMPTNLYGTGDNYDLFTSH  
VLPAMIRKIHEAKEGRQPVVWLDGDTPLREFLHADDLADAAVMLMEQYNYKDIGELINIG  
SGQELNIRQLAELIADVEGFRGEIQWDTSKPNGTPRKFLDSSRLFALGWKPKIGLREGIE  
RAYREFLSFNTENRR\*

>SPBDM4\_v1\_50756|ID:27159119| Mannose-1-phosphate guanylyltransferase (fragment) [Uncultured spirochete  
bdmA 4]  
MMVNLILCGGSGTRLWPLSRKKTTPKQFVRLFKDKSLFEEALSRNRPLCDKFVVATNIEHL  
PLVERQMARMGIDKVEGLLEPLGRNTAPAIALILMGLPRDELVLVSPSDHHITKLDQYTE  
AVRRAALASQGFLVTFGIKPQYAETGYGYEADGEKVISFREKPDRTAEHYLASDRYF  
WNSGMFVFSAGTFLDELSSYAPEVFTAAARTYERAEEKDLLRPRPEDMSAIPSISIDYAV  
MEKSKRVKVVACDPGWSLDGSFDALYDEARGDADNAALADNAMFLNSRRCLVVGGEKPII  
LEGVEDLIVVQTDETTIMRRGQSQNVRDVLKAVADRRPDL\*

>SPBDM4\_v1\_50757|ID:27159120| conserved protein of unknown function [Uncultured spirochete bdmA 4]  
MSSVSVLIPAYNAEGTLRKSVESVLGQKMDGSQQFEIIVDDGSTDSTACVAESLADRGR  
GLIRIIHQKNSGPAAARNAGIRAARGDYVAFLDADDQWLPGLGTQLEILEADPNLDLVC  
TAMNGKRFLLRPERFALNFMDLLPNIVYTSSVVVRKSTLTAAGCFNEARMYSEDFELWL  
RIAHRGKIMVLNKPLIRYMKGRGISAKFWPMEKGELETYAIMLREGWISARRQTTLRWWS  
LFKYLIRRIR\*

>SPBDM4\_v1\_50758|ID:27159121| putative UDP-glucose:polyglycerol phosphate glucosyltransferase [Uncultured  
spirochete bdmA 4]  
MKVLFVINDAHGWAGTERVTNLIANGLSARLEVEVLSLRPRPQNACGYYPYNPEVKLSYLP  
LAGGIRTFLASNVRVFRFTEQASPDVILSGVGEIKNFIVASPRRRHRPRLFAWEHFNA  
AYASRHLRRRIAARYCDVIVSLTKKDAEDWRQMLRPAVVSIPNPVPEFPERAASLDTNR  
ILALGRLEDQKRFDLLIDAFALFAQSHPGWYLIRGSGSKEAELRDKICVLGLQDKMEIF  
PPTHDAEEYAGASMYVLSSGYEGFPMTLVEAMAAGVPCVSFDCPDGPSEIENDHDGFF  
VPLYDVVALAEKMGRLADDVTLRRQMGAARQNIRRYEAGPILEQWSALLHGLGAGE\*

>SPBDM4\_v1\_50759|ID:27159122|gmd| GDP-D-mannose dehydratase, NAD(P)-binding [Uncultured spirochete  
bdmA 4]  
MEKTKTALITGVTGQDGSYLVQLLLEKGYTVHGIKRRSSSFNTQRIDHLYKDPHPDNHF  
RLHYGDLTDSTNLIRLVGEIEPDEIYNLAAQSHVKVSFDTPEYTANTDGLGTLRLLEAIR  
LLGLEEKTRFYQASTSELFGMIRETPQRETTPFYPRSPYAVAKLYAYWITVNYREAYGMH  
ASNGILFNHESVPRGETFVTRKITRAAARIKYGLEPKLYLGNLDAKRDWGHAKDYVEGMW  
RILQQPEPDDYVLATGRTTTIRDFVTMAFRHAGFEMEWGRNGLEEKGIDSATGKILVEVD  
PVYFRPTEVDLLLGDASKAREKLGWVPQHSLEGLVHEMMEHDLAEAEKERYLKDGGYRVF  
EPRE\*

>SPBDM4\_v1\_50760|ID:27159123| exported protein of unknown function [Uncultured spirochete bdmA 4]  
VKSVRTAFPLAFLMTLVISVSLTAADADSGYAGVFRNLSAAEASMLERGERLIRPLKAS  
DSLSLAREDSGAKEIVKRLRDLHPNYTVEFMAIVPIKNAAKTESTLNRIAEALSDVQGYV  
NIPYWSQRQKTSYALFDKMEVLDRKTAGTNAESIEVRQHMEPFDEFRRARYDYRLEAGAL  
RFSANLDTIVYTYQHFRVAPNNMAWELYIFLQEDRFYVYGIGAVKAFDLFGLFRDRLE  
PSLMGRAESFFTYITQKISPLEGNE\*

>SPBDM4\_v1\_50761|ID:27159124| conserved exported protein of unknown function [Uncultured spirochete bdmA 4]  
MHKPGFFLVILLIICAPFAFPEGESPEGESRVVYTVRSVSFKITGSTMERVLRQKANID  
LGTEFATLEEFESYLEQRRQVLLNERVLAEVKAEYTLKGGDDGRVFIDITFITKDSWNVV  
ALPYFKYDSNDGLVLSARGRDYNFFGSMQVLILNIDY AIDPIGRHSYGGLASMNLPFLA  
GYDAGFSVYEDLAVHADGRPTSSISNLGFSVLLPTRSYPINLSANQGLQFNPDEVDNDS  
PYFLVSSLTASSSLPTGFPVGRYGSVSYVPALTASLNWRPGEMVRDDRKGFKLTFSHGLH

FSRIDWINNMRRGMAASLTNTDAYNLMTAVPQIDIDANFFYHATSKGLIGFEARFVGFHS  
FTNTIRTDLGSYMRGIVDARLWGGSA AFLNLQ MPLKLFDFP THVIIGKNWFD FELQ TTPF  
VDLGYCRKNLGD TFLDSA WYTAGLEFSVYPLRMRTFIVRASAALDLDAVIRNKSLTAPSP  
RDGGSPYEIFFGLGLFF\*

>SPBDM4\_v1\_50762|ID:27159125| Peptide methionine sulfoxide reductase MsrA (modular protein) [Uncultured spirochete bdmA 4]

MKFRIYAVLSIVLSFFLFCASKGSDSIESMNSALASAKNAKPPLLGPRRTTPAQQKDGPR  
IEEQFGMPVNIVRTDGLQYAILAGGCFWCLEGVYELVPGVEDVISGYEGGSAPSPTYEEV  
STGTTGYAESVLILFDPAKVSYGELLDIFWHIHDPTTKDRQGYDVGPQYRSAVFYLNDTQ  
KAEAQKSIRAQQEWPVPIVTEVRPAGLFWPAEDYHQDFYSNNPDYGYCQVIITPKVEKV  
FQAK\*

>SPBDM4\_v1\_50763|ID:27159126| protein of unknown function [Uncultured spirochete bdmA 4]

MSRERFFADEHRIIDA AISLICENGYEKFSTRRLAARLGVSPMTLYNYFSNKEEIVQVTI  
STAYEKAFEAIQDDL RGYFERESACPLMGFVEMGRKLF AFSKQYPQMYALVFVMNFSPYR  
DQPSLVECYNYTFKKVFERLVDKNIEEELHRHIYLFQVLVSALVRNIYNKLGPTDEETFE  
INLLLAYNRLLKPFERYFAVCQGIQ\*

>SPBDM4\_v1\_50764|ID:27159127| Esterase/lipase [Uncultured spirochete bdmA 4]

MIFMNHEPQSVRSMLVEQVFRSAQVSHGQDSSPPRFIVRQYTKSLLAAEPPLVIRARLDV  
KSFSIAESRVHVLIPRFEGCGRCILYLHGGSYVATFTRQHWNFLAKIAEKTKSVIIAPDY  
PLAPEHHWSEAYRMLFALWERMGEFLPRKSIVLMGDSAGGGLALGFVQALRDAHLTMPAS  
VIMLSPWLDVTLENPQIGELSPVDPFLNVEALRTAGKAWTGGSNPRRMEISPIYGHFENL  
PPLSLFIGTKDVL LADCRKLWNICSVTEVPLDYEYEHMLHVWMLLPIRESGHA VAQIAG  
ILATQAQCADIDAVLEFSKEDEA\*

>SPBDM4\_v1\_50765|ID:27159128| putative 26 kDa periplasmic immunogenic protein [Uncultured spirochete bdmA 4]

MRAGRTAKRTGLWGTGLAMLVLGLFVVTGAAAQGM DAPGAGS QFQKRSIQVQGGQATMSV  
EPDVAYLRLGVETQGDTLAKAQQLAERASKVLDALSQAGIDRTNMKTSSYRVSPVYSTR  
QDKQNVIIIGYRAETTINVEVADLSSVAGLVDAAMNAGANVVR S ISYDRKDMQTFKVLIQ  
AACMDAKMKADAAAAAFGAQVGAPVSVDIQDSFSAREAGNVMMMKAAAPDFLSPGELDIG  
VSVSVEFDLRVE\*

>SPBDM4\_v1\_50766|ID:27159129| putative Glutamate racemase [Uncultured spirochete bdmA 4]

MRAPCDIVYVGDNANMPYGNRPFSEIVSLAGRMLDMLSEHEVEVVAIACNTISATVEHLR  
PLSKVPLVDIISPAEALARRGEPDVGLFATEFTVKSLHAKRVGELNPVVKVHGVSSPR  
LAALIDGAIGDEKAIRDEIASMLEKLASLHPVTTVLLGCTHYPIVMEIFKSLAPDIAFID  
PADLQADEVMRLLRHDGWGSAVALNMAHAEVSGAARAAAPSLEIITSGIPDSYRRIMQRL  
GIPEAQSIRRLEA\*

>SPBDM4\_v1\_50767|ID:27159130| conserved protein of unknown function [Uncultured spirochete bdmA 4]

MKYVKIRDVTLRDGQQSQFATRMTNEQVKAVLDDYRQSHFYAMEVWGGAVPDSVMRYLGE  
DPWDRLATIKKGVGDASKLTALSRGRNLFGYTPY PDSVIEGFCKNAIATGIDIMRIFDAL  
NDIDNMKSSIRFVKEAGGLADCAVCYTVDPRFTFSDRVNALFSGKKIPPKLFTVDYVVKK  
AKELASLGADMITIKDMAGLIDPSAAELIKALKNELAVPVDLHCTHCTPGFGVASLLAAM  
VNGVDIVDTAVLSFSGGPAAPAYEIRVFADRLGLSTDVDNAAVARIDRRLRQIRGELSA  
YDQYKKLPPELDLSKDSLPPHLSKLFDDALEAAVGGKYQKSLVICQEIEKAFSYPDPDEI  
VRHAQIPGGMYTNMMAQLKEAKLQHLGEVLRVPRVRLDSGLPPLVTPTSQIVGVQAVN  
CMISLHQQKEMYENVSKNFADLILGSYGKTPWPVDPEFRNKICGTREEKPYDTSKYQAQE  
NPPVAEAGGALLAQNEKEQLLELFP SVATKFLRNRRMEEWKT AHPEEETPQPGAQAATA  
PPSPYEAADYEPSDGEPPSFWE DAPGWAGWTD A IKPQGGVYSEPQESQVFA\*

>SPBDM4\_v1\_50768|ID:27159131|korA| 2-oxoglutarate synthase subunit KorA [Uncultured spirochete bdmA 4]

MVEKVRLMQGNEACTMAAIAAGLEFYAGYPITPSTEIAEMCSEELPKVGGKFIQMEDEIG  
SISACIGASLTGAKAMTATSGPGFSLMQEAIGYASLCEIPLVIIDVQRVGPSTGMPTSPA  
QGDVMQARWGTHGDHPIIALAPGNVKECYELTFRAFELSEKYRVPVIVLTDEVIGHMREK  
VVLPDPGSYKIPMRAMPQNPA GYKPYAADPNGGVPLMAPFGMGYRWHCTGLFHDENGAPS  
SKPAVASVLMRRLNLKVENRADDLADYFAEGLED CDLAVVSFGSSAMAALSAVRRARSEG  
YKVG MFRPKTIWPFPTATVRRL LAPAKRILVPEMNLGQLALEIERAAGCERP VIRLGKVN

GELFHPDEVFAAIKEAL\*

>SPBDM4\_v1\_50769|ID:27159132|korB| 2-oxoglutarate synthase subunit KorB [Uncultured spirochete bdmA 4]  
MAEFLSYFRQDRPLPHIWCPGCGNGTVTGALVRAIDKLGDKNNIVVVSIGICSSRAVGYL  
DFDTLHTTHGRAIAFATGVKLRPRLKVVITGDGDSAAIGGNHFIHAARRNIDITIII  
NNNIYGMTSGQASPMTPHGMMLGTTAPYGNVEYNFDLCELAKAAGATYVARATTYHYVLE  
DLIAKAIMHKGFSVVEALSQCPTYFGRKNKIGGAVDTLNWIKDQTINVKAAAALPPEKRE  
GKILIGELHSIEKAEFTQQYLEVIKAVQRANPSYARNKGVPGCELNSD\*

>SPBDM4\_v1\_50770|ID:27159133|korC| 2-oxoglutarate synthase subunit KorC [Uncultured spirochete bdmA 4]  
MRVEFRLSGSGGQGLLLAGIVLAEAAIRDGKNAVQTQSYGPEARGGSSKAEVVIADGDID  
YPKATAPDFLLALTSDAYRSYGLSMKKGIITDSTVKIDPPAGVPVVALPILETASKKLG  
RAVVANIVALGVLGGISGIASPKALKEAVRSRVPKGTEDLNLAALEEGLALAAQAKAAH\*

>SPBDM4\_v1\_50771|ID:27159134|yliK| fragment of methylmalonyl-CoA mutase (part 1) [Uncultured spirochete bdmA 4]

MVDFEKLQDFNVWVKARVEKANEKYPERKKQFVTGNSAPVDRVYTPLDQVDSYSRQLGL  
PGEFPYTRGVQPTMYRGRWLWTRQYAGFGTAESNARYKYLLEQGQTGLSVAFDLPTQIG  
YSDHPLSEGEVGVGVAIDSLADMEVLFGGIPLDKVSTSMNTINAPAAVLLAMYIVVAEK  
QGVGAEALNGTIQNDILKEYIARGTYIFPPAPSMRLITDIFEYCAKNVPNWNTISISGYH  
IREAGATAVQEVAFTLADGIAYVEAAIRAGLDVDEFAPRLSFFFNHNDLFEEVAKFRAA  
RRVWAHIMRDRFGAKNPKSWMLRFHTQTGGSTLTAQQPDNNIIRVTLQALAAVLGGTQSL  
HTNSRDEALALPTEEA VRIALRTQQIIAYESGAAETVDPLAGSYVESLTDRIEKEALQY  
IKRIDLGGAVKAEQGYIQQEIQDSAYAWQMDVEKNERIIVGLNKFQVKENPPKGLLRV  
DPAVGEHQKRLASLKANRNQNNVDSALASLRKAASGADNLMPPILEAVRAYATLGEICG  
VLREEFGYKPNVMF\*

>SPBDM4\_v1\_50772|ID:27159135|yliK| fragment of methylmalonyl-CoA mutase (part 2) [Uncultured spirochete bdmA 4]

MERKIRVLVAKPGLDGHDRGAKVIARALRDAGMEVIYTGLRQTPEQIVSAAIQEDVDVVA  
LSILSGAHNHLFPRVVELLRERGAADDVLVFGGGVIPEEDIPFLKSKGIAEIFGPGTPTSK  
TIEFIRANLKRPLN\*

>SPBDM4\_v1\_50773|ID:27159136| putative enzyme [Uncultured spirochete bdmA 4]

MNELVRRCIEGDVRAAARLITLLESQDRDAYAALYRLKDHAGRAQVIGITGPPGAGKSTL  
ADKLITQFRARGLRVGLAVDPSSPFGGAILGERLRMQSHATDTGVFIRSLATRGLGG  
ISKATHAAIRVLDAAAGYDIVLVETVGVGQSEVDIVRVADTVVLVSVPLGDDIQVIKAGI  
MEIGDIFVVKADRDRGADRVRREL RAMLETQVQLRGGQAPAGGPDTLAARDPDMHAGL  
ERAAPAAPTGPVPAVPFPVLTIAETGVGVPELADAIARHFERLKNTEGELERKRLESI  
RYQLGQFVFDEITHLLSLSLSKVRDDLAQKVISRELDVYSAGVALFHSIPEQGAPREHP  
QT\*

>SPBDM4\_v1\_50774|ID:27159137| conserved protein of unknown function [Uncultured spirochete bdmA 4]

VNTRLRDHIGIAVEKIDASLPVWEGILSLPLHGIEEVADQKVKTAFMPIGESEIELLETT  
DPEGPIGRFLAAKGQGVHHLAFRVANIDDALAEKAKGIRLIDETPRHGAGGARIAFIHP  
KATGGVLVELCERA\*

>SPBDM4\_v1\_50775|ID:27159138|pccB| Propionyl-CoA carboxylase beta chain [Uncultured spirochete bdmA 4]

MEEKLRELEERRAKVLAGGGPKRVAQAHEKGKMTARERIEMLLDPGTFMELDAFVEHRAT  
QLGMDKIDAPGEGVVTGYGLVNGRNVCFVAQDFTVIGGSLGEMHAAKICKVMDLAVKIGC  
PLVGINDSGGARIQEGVDALSGYGEIFYRNTLASGVIPQISVIMGPCAGGAVYSPALTD  
VFMTEGTSNMFITGPQVIKAVTGEEVSAEDLGGARVHSEVSGVSHFSFPDEQSTIEAIRK  
LLSYLPQNNVEDPPVMDIGDDPNRTDDALADLMPDSPNKPVDVRDIITRIVDSADFFEVQ  
PDYAKNIVTGFARLAGRSVGIANQPKHLAGVLDINASDKATRFIRFCDSFNMPLLTLD  
TAGYLPVGVQEHGGVIRHGAKLLYAYSEASVPKLTIVILRKAYGGAYIAMCSRHLGADQVF  
AWPTAEIAVMGPEGAANIIFKKEIEESADPATMRKDKIEEYKRSFANPYMAAARGYVDDV  
IEPSHTRMRLCNALNTLLGKRQSTPSRKHGNIPV\*

>SPBDM4\_v1\_50776|ID:27159139| protein of unknown function [Uncultured spirochete bdmA 4]

MTNPWMIMLLGIITVFVFLIILFLLGFPFGGALKRREHGKPAFLPQIIIEVTKKTVLA  
ADGSASQTAGEFSAQEEETLVAVLTAAVAASSSEIGSFAITQVRQAQAESSGGFNTPVW  
GRVERLARK\*

>SPBDM4\_v1\_50777|ID:27159140|gcdC| Glutaconyl-CoA decarboxylase subunit gamma [Uncultured spirochete bdmA 4]

MKQYRITVNGKSYDVTVEELGGAKHVPAAAPTPTVISAPAPNAAPAAPVQPAAPANGGSII  
TVKAPMPGTVLSFKVIVGQQVKRGDVLLEAMKMENEIVAPQDGTVVALRVPASASVNT  
GDPLVDLA\*

>SPBDM4\_v1\_50778|ID:27159141|gcdB| Glutaconyl-CoA decarboxylase subunit beta [Uncultured spirochete bdmA 4]

MEAFFSHFISSTGFIAMTWGQLLMLVISCVLLYLGIAREYEPLLLVPIAFGMLLANIPMS  
GITDGPDKDGLVGGLIYYLYQGVKLGIVPLIFLIGAMTDFGPLIANPWSLLLGAQAQLG  
IFIPFIAAYYMGFDLKSCGSIHGGADGPTAIYVTSRLKPELLGPVAIAAASYMALVPL  
IQPPIMKALTTKKERQVKMAQLREVSKAERIVFPILVTLIGLLLPAAVPLVGSMLGNL  
FRESGVTDRLSDTAQHALINILTIFLGVSVGSTASAAKFLNPQTLMIALGLFAFCCGTA  
GGVLFKIMYRVTGGKVNPLIGSAGVSAVPMAARVSQVVGAKEDPTNFLMHAMGPNVAG  
VIGSAVAAGVLLSVLG\*

>SPBDM4\_v1\_50779|ID:27159142| Aspartate kinase [Uncultured spirochete bdmA 4]

MKILKFGGTSVGSPEAVRALVTIAKDSGERVFFVSAFSGITDSSLQAAQCASEGGEWRL  
FETISERHHSMIAALLAPPLEATATASTNALLGELSSLLGISLVSDLSPRTLDELVASFG  
ERLSAGILAQTLQSGIEAEAVDARQFIVTDDKFGAAHWLEAETTRRVSTFFENPHIAV  
VTGFIGSTEDGLTTTLGRGGSDFTAGILGACLNAAEQIWTVDVGIMTADPKAVPDAFVI  
PEISYVEAMEMSHFGAKVLHPPTILPAMSKGIPVRILNTFNPQAPGTRIVREAVPSTWPV  
RGIAAIISSISLLLQGPGLPGVTGIAGRMFAALAAARVNVILITQGSSELSICCAVLPQD  
ADRGVRLREEFRYEIGTGTIQMPAVEKDLSVIAVVGEMMKHRVGISGRVFKALGRNGIN  
VVAIAQGSSELNISIVVSAQERNKAMSAIHDAFFLAGVRTVNVFLVGTGLIGGTLSSQVA  
AQHRKLFQDRSIRVRIAGIANSRNLIDSKGIDIDHWQETLTAQGHKTDLGHFVQALLKL  
NLPNACFCDCCTASDIPVQFYESMLSASISVVTNPKRNGSGTLQQYRRLIDLAREMDVPYR  
YETTVGAGLPVIGTIQDLVASGDEIFKIEAVLSGTISYIFNNLGPGLAFSELVKQAKQLG  
YTEPDRDDLARDIARKAILAREAGYAFEGSTVQIEPLISERISRAPSIDACMALLPE  
MDGVLEGRRTAASQKGTVLRYSVITQRCRLSLCEYGPDSPFYSLTGTDNMVVITSKRY  
SQNPLVIRGPGAGADVTAGGVFADILKTAESYL\*

>SPBDM4\_v1\_50780|ID:27159143| TRAP transporter, 4TM/12TM fusion protein [Uncultured spirochete bdmA 4]

MSDSQKIQQENAASDAQEVLKKFDKEANYRTYAGFFAKVISALAIASFVFLYTATFGVL  
DAMIQRSIHLSFGLTLIYLLYPTSKKWSHTKLHPVDAVLAVLGALAPMYIIVNYQKLVLR  
AGTATPLDIVFGILGVLLVLEAARRVVGVPVVIALVFIAYAFAGPYIPGKLAHRGANFE  
TLIQHLYFTTEGVFGIPLGVSSTFIFLIFLFGAFLERTGLGQLFIDLANA VAGWAAGGPA  
KVAVLSSALMGTVSGSSVANVVGTSFTIPMMKRLGYKPEFAGAVEAAASTGGQLMPPIM  
GAAAFLEMAEFTNIPYARIIGAAVVPAILYFGVWAGVHFEAKKSGLKGLSRDELPLKNI  
VLERGHLLIPLVAIIYLLVTGYTPMKAALWAIILSIVSSWLKKSTRIPPIEIVRALEGA  
RSALGVLAATACAGIIIGVVTLTGLGLKLGSVLVDLAGGRLVPTLFFTMLTSLILGMGVP  
TTANYVITSTIAAPAIIMLLSRQAGLDPYAVAPASIIIPAHMFAFYFGIADVTTPVALA  
AFAGAGIAKANPMKTGINATKLAIAAFLVPYIFVMNPQMLLFNVNAISFIWMLITSVVG  
ISIAAAVNGWLMTTTTLWYERIVGFAGGVLLIYPGLTTDLIGMGLVAIMVISQVTRSRKAR  
RVAASQ\*

>SPBDM4\_v1\_50781|ID:27159144| exported protein of unknown function [Uncultured spirochete bdmA 4]

MKNTRKRSKILILIAVIAIVAILVFASHIRLVPVLIKSDRGATIARLPLYDGQFIHFI  
HSVHKTTPVDEYFEVHGTTLELTKVKYDITYGVGMPSDGGEAFTIENGRFVVTMHRFTSHIP  
IRVSIVPDHGVIVGGTLPFTRWVPQESAITLSAGRMLIFHNGRTSPK\*

>SPBDM4\_v1\_50782|ID:27159145|bcsP| 31 kDa immunogenic protein [Uncultured spirochete bdmA 4]

MKKIAAIVFCLLLATSFAQQQFITIATGGTAGTYFPLGGALADIWNKNIPKMNATAQST  
GASIANINLLKGGNVDFIQTQNDVANYSYNGTELLKDQAYKDLRGIVCLYNETIQLVALE  
SSGIKTVALDKGKRVSVGAAGSGTEANARQILEAAGLTYNDIKVQYLSFGESANMKDGN  
IDAAFNTAGIPTAAIQDLSVSRKMVLVPIDGAVAAKLMKYPFYALQVPTETYKGGQTK  
VTTVAVKSMALAVSSKLPADLVYQLLETFLNNTDRLIAAHAQGNVKLETALEGMSIPLHP  
GAEKFYKDKGVLK\*

>SPBDM4\_v1\_50783|ID:27159146| protein of unknown function [Uncultured spirochete bdmA 4]

LISFENWKRGLITVAGQRLWHHTTKRPAVFVHRTGEMKSAWRGAGTCMSAIVLDGGTSF

AFSSKLV MREEFRGLGTF AAFISLYFSSPDPEIDSLRLRFHDVPRAQWNLGPRASHVVH  
GRIELPSQVQTAAAFALDGRFLQCQSTGARSLYFGDGSFVLTLDLPAEVHVG YAHNPAEAC  
SLWHGWDQRVQSQRGGTGPLTHGASQEAVRIMSKDAAGLLGSLSFSGAEPEAFQHLNLSI  
AKSACGQEDWKIADLMLCQPDLTPPIFRREIPQGLNMSGNRMRAQNRYARIRSGFAQ\*  
>SPBDM4\_v1\_50784|ID:27159147| membrane protein of unknown function [Uncultured spirochete bdmA 4]  
MTIVAAYFTALFGNFLSLGFSLQKKHISWLSAKRRGEKVRERGEIIGWTS GFILMNMQPV  
FNYLALGKLAPNIVAAISGSNIIFTILLSYFMLGEQIPVGKIPWIVLMTASLAYAGFVGG  
ESSQHFKADAFWIAFLIPACFAMLMLLASRRMRPKQVGIFLGSAAAGALGGFQLLALALR  
ITHGADFLSWILSPYLYVYIFCGIASFFIKQVAFGRGKMTAVAPSFYGLLVLYPSIATYF  
VSEVPLHVPQLFAFVGISLSIVLISL\*

>SPBDM4\_v1\_50785|ID:27159148|ispF| Bifunctional enzyme IspD/IspF [Uncultured spirochete bdmA 4]  
MSPSAPRPVRAPTLPIGRAFALVTAAGLSTRYGGTKKEFEILDDITVLERAIIEPFIEFC  
SGIVVTCPIGAKPEFEAFFTKSTLMPSLSRLNAGFAIVEGGAARQESVRLGLRALAALGC  
APDIVLIHDGARPWISRELILKTLECAQARGASLPLIPLTETPKIVEGEYIHTHPARTHM  
MTAQTPQAFSFEILAAHELALQEKYSATDDAMIWDHYVGPVFWVEGERQNRKITFKEDI  
MNGSELRTGIGYDIHPLVEGRPLLAGVRIENRRGEAGYSDGDVLWHAIDAALGAAALG  
DIGTHFPPEPAWENADSTELARRALKMVKKQGWVIVNLDCTVVCETPKLSPYREQICAS  
IAEILGLPSGAVSFKAKTKEGFDATGRGEAIEAQA AVLLVRR\*

>SPBDM4\_v1\_50786|ID:27159149| Transcriptional regulator, CarD family [Uncultured spirochete bdmA 4]  
MPNDQTVTFLVDQRVVYPSQGVGRIMEIREKIFNGQKTLYYIIYLEFSDMTVMVPVDKVD  
ALGIRPLVSREEAETALNYISQAASTIPSDWKLRYQMNLDLLKKG SIMDIAAVVRSLYQR  
SKIKELPILERKLYESALNLLQDEIAFALGRPKEEIVAIIRENLDK\*

>SPBDM4\_v1\_50787|ID:27159150| conserved membrane protein of unknown function [Uncultured spirochete bdmA 4]  
MVMPSMEEAKKDEEREPLTLGSLAFPIILLVVLVIAGFLLKDKLAPLLSKRETMRTWVLSF  
GAFGWL VVSLQILQV VIFVIPGEVMQISGGFIFGFWGGLGLTTLGITIGSALNFLGLRL  
LGPRFLMTILKRGQYEKLRQSADDARTFAGIILLFVIPGIPKDVLCYFAGTGSRSFLPFL  
IASMIARMPGIIGTTFAGSAVYREKFGLVITLAVFTVILMIVLIAFRSQIEAIIKKHMQE  
EKP\*

>SPBDM4\_v1\_50788|ID:27159152| protein of unknown function [Uncultured spirochete bdmA 4]  
MKRRERALHRRYWIVGILCSLIFHGLVIFLPLRFSSGRDALPRSLNIGLIGQIAPESRLE  
TQQVPRNLKKAETESPAQK GASQQKPNPESSVNGTTADRKVVPESVAEEGPKEAPQTPHV  
ASVLPAGPASVADVHAAEVEPPAGA QASLPVSAPVTQEPVNMQSLYEESAVLRELGSIAE  
VPLAGQDSADSSDRMPKDALSKEASNSASAPPVAARAEEAKKEVSPHDTAVPAPIHLEE  
TAKLVETNTPAASRAPAAALASASREYFAPSGDLFVQARNLSGSSPSKVS VADSTSSPRS  
DSAEAQAALHETVPLQSEQMAELAAERIDAYHTIRYQERAVSGISQVQSPQQNAGPRDPA  
RHELTSQDQSEREVERLAEISPA VPPEENSAPFEIAAPAAQTALRPDAEMMPPAVSPVVP  
PSATALGGTPPGERPLSDAVSDQSTPAQPPARQDTASSVAQLSLADSNPPHFDTAETLSR  
RIIAALSAQKEYPVAALKRKTEGTVRLSLDVAPNGSLVMAKIQTRSGSAILDEAALRLVR  
GIFPLSVRLASAVSLVVPVEYRIPK\*

>SPBDM4\_v1\_50789|ID:27159151| protein of unknown function [Uncultured spirochete bdmA 4]  
VLSATLTFDGEEDKFRAC TKNKSPDGAKYSLDALASAAAGARLAAGVVFVSTNFAVSSRWM  
GAGTAVS\*

>SPBDM4\_v1\_50790|ID:27159153| exported protein of unknown function [Uncultured spirochete bdmA 4]  
MKKFLSKEQRSIFAVGLMLVLVTLTG CNLLLPTQGSTADVFAVDSKNGSVYEIDTDNAQS  
ASVALVSTQQNSTGEMIIRGTKAFIAVGSYSNTSPGLYWF DLSSSNPTTELIGDKLSAQY  
ICIVSDTKGYVSSSDYMGTYSN TVYSFDPSNPSAALGGEVTGFDSGFHPQDIA YVSDGGD  
GRVFDVTDNGNGKVYRLNAAGTAVELTFTTSAGGTTGLLSGEYDWDNNGSEDAGIFVANTG  
GYDASWNALPGSIDFIPLDASGSSDITSVQTD FSVGRLAAFDTAHLIGTNYGGT WIIDL T  
KSAGDSGRLTEIKNSQGESFGSLDVNMYDGYSYVPDGTNTVYRISSSGDVTAISVGKSGE  
MITNVAVRE\*

>SPBDM4\_v1\_50791|ID:27159154| exported protein of unknown function [Uncultured spirochete bdmA 4]  
MQPSRPTRALLALCLFNLCFPAAFSQTVELPSVIVEGVLPMSDLAPSAGTTSIDHAAIEA  
SAAPDLTLLSSISGVIISPTGADGAQSTISLRGSTSNQVLVLVDGVRVTD PATGQTDLS



RLDIPLDQIERIEIQRGALSAQYGADAVGGVIHIHTKKKTAAPSIDISIQNNAFLPSSVT  
VGSGFAATTVPFVGSALVDGQSVDISANMKNLSAWAKAERATNGYPYDNTNGQRRQRTNA  
SLLATAGGFQGSFPLSIGELSTTARVNYRSMGVAGTEDSPTPEARQEDWNANLSTHFSTD  
ALFAGALALDVNPYAQVGGIQYRESDTSGTDTHHSYRAGAESSFSWLPPWQGELKGGASF  
RYDRLESSVVKASDGGPPQRFSAGTFVEPHFEIGKWTAPALRYDATSDFPSPGVSASLGL  
LYDLAKDTVVRSSISSAYRAPSFDLDYWPASGGTEGDPDLEPETAFSGDLSVAHRDEQKT  
WSIGAFGRYVQDVILWQPDASGTWKPTNYGNALYPGIEAEASSNIGTWQISGNYTFLYSF  
VLSGNLTLADDKRVPYVPVHSASLSAVRSSRNFKSAFMFTYKSLRYTTTGNLAYLPATLI  
ANAKLQWALSPRTDFELSFQNFDERYEIVQGYPMPGFSVSAKFTMHIQGQKAPVQ\*

>SPBDM4\_v1\_50792|ID:27159155| conserved membrane protein of unknown function [Uncultured spirochete bdmA 4]

MADKMHVWRFRRIGGMDQVVLKTGEDIAALSELDPKLWAALAMPTSQHRCKEALSLLED  
HDGRVRVPEILHAVEKFRMAFTTLDILFDENSAISLDRLKDGHLREACVNAAHAGAEVE  
GVDAAVVEKAISLYNERTFNGDGVVVPESAKDPHTAGIETLIASGYQAIDSSGKNGVDN  
VALDAFAHDANIVLEWNAKGESIRRTLPDLPFDAILPAFRTISDVMDDYFRRCAVLDLAG  
TPDALKNLETQMAAALSTPLGNNAEALQALPLALPRADGLLALDAAYNPLYETEVKSFLD  
AVKTPYGLEKELDKTAWSRIAADCRMYAAWTDKPPVGAESIDPSMLSDILNGGSLDAIR  
TLITRDIAEAHAELHELHNILVLKKDLLKILRNFTVMDEFYGSREGIFQSGRLFIDGR  
ELELCLDVRNSTAHSSMAGLAGMYLIYCDITRTTGEKGSVVAALTAGDADRIYVGRNGIY  
FDNDGLDWNATITKVVIQPIREAFSPYKWLARTIEEFTAKRAGTAEAGRQSQLKEFA  
QKAVEQPTKAPQAAEQIAPKKIDVGTVAAGVALGSIGVMITSILSLFIGMGVWMPIGIL  
VVFLISGPSMILAAIKLRKRDLSPILNAEGWAINGRLKLNLIFFGAALSHLGNLPPNSIR  
MLNDPYAPKKKPWALYIVILIIVVAVVAWLSGWLDPVFAWLKG\*

>SPBDM4\_v1\_50793|ID:27159156| protein of unknown function [Uncultured spirochete bdmA 4]  
MEAKKADFIESAAGQTVEVIYKVEPKRDILRQTIQVSPEEK\*

>SPBDM4\_v1\_50794|ID:27159157| protein of unknown function [Uncultured spirochete bdmA 4]  
MTYHREEICINNAGLVLCNPFLPRLFSLQLTGENGFKDRSSAERAVLLLQYMLFESTDT  
NEHEPMLNKLLCGLEVVSRSGLL\*

>SPBDM4\_v1\_50795|ID:27159158| Single-stranded-DNA-specific exonuclease RecJ [Uncultured spirochete bdmA 4]

MKWTKEIDPALVRTIAHRYQVDALASIFVRRNLIEPEQIQFYLEDLQLLHNPFLFTS  
MEDAIDRLIMAREEEEEKVLVFGSDTDGITSTVLMTDALKNFGLEVFKVPEGEEPYGLS  
KAAVDSAEENGISLIITVDCGISNHEEVVYAQQQGIDVIIADHHHLQAQTPPEAIAVLDP  
KLPDCGYPFSDLSGCGVSLKLAHALAIARLGMYPEPLALLYAGKTAEAETNSPAENGASE  
TKSASSLVLEAVKLDNLIETSRLRLSDSEGSFPADTLEKLEKFLRGRVVISWNKKEIND  
FFRNQFNGSADLDVMDLSQLASTFWPGMAKSSFAELAQASRLKKYARGVHTAADTLKNIF  
NAYVLQALQTQGLLTGRMFQLAALGTIADLMPLKDENRLIVRRGMEGINAPTGDIRELK  
LSLNLARPLGATEIAWQITPTINAAGRLGTPSLALNLLQADTIEHAIEAASKLVQANNER  
RRLGTEGWEIIRDRLNESLEKSGGKFAVAGSAEIKSGITGLLASRAANMMKVPVIVAVFK  
ANGTCTGSIRGGAAPPLTRLLAYCADFLDYGGHDSAAGFTLKADQWQVFLDRLYEFMYR  
TEFSTEEPEISIDAELPHAYVTPDLLHLCHHFEPFGEENDPLVFCSSKVPVMDAQVVGKN  
GKNHLKLTNLFGTYKWPAMLWDGAERLERDFSFRNNDKVDILYKVTNTNYWNGEERPQLEL  
YDIHRTE\*

>SPBDM4\_v1\_50796|ID:27159159|pdp| Pyrimidine-nucleoside phosphorylase [Uncultured spirochete bdmA 4]

MRAVDVIMKKRSGDPLNDEEIRFIEGYVKGEIPDYQISALLMAIFFRGMTPPEETAKLTE  
VMLDSGDRMDLSGISGPFVDKHSTGGVGDKISLPLAPMVAACGIKVPMMSGRALGHTGGT  
LDKLESIPGYFTSLELAAFRKGLIEDGFAMTGQTARVVPADKKLYALRDVTGTVESIPLI  
TASILSKKVAEGAELVFDVKCGSGAFMKTFFDDAKALAKSLVATGTAMGKRVAVLTDMS  
QPLGYKVGNFLEIEETIDCLEGKGPEDVMELTYRLGAWMLMLGGAAKDIDEGRARCAEAI  
DSGAALDLFYRNIVRQGSIGEMLARRGAWRSEFSREIRAEGEGFIESIDALKIGLAGVY  
LGVGRNRTEDSVSPTAGFIFEKKGGAHVKKGELIAVAYGKDVESLDPALLASGAISISD  
TAPGSSPLILEEITAQ\*

>SPBDM4\_v1\_50797|ID:27159160| protein of unknown function [Uncultured spirochete bdmA 4]

MAERNERYRGMFLHAKDTARGDRIVTFLCNEGLLSLFFVGGPKSSLRSAAMPFVSAEIEA  
YRDKRSEFIKLTGVNILETYEGIQKSFHMQTASGAAEFVLHTSAFGGEYGGQALTMMTAL

LRELSKIDERHAVLALHVFLWKALMPLGLAPDISTCERCGRSFTGKGALPGRLLMGDRSF  
LCAGCAEERRQQGFASAMISFDAETLGLHAVLQLPYGEAAHLMGSTRPSSNVMAIIES  
LAESAGEGPLQSLRLFH\*

>SPBDM4\_v1\_50798|ID:27159161| Peptidase S54, rhomboid domain protein [Uncultured spirochete bdmA 4]  
MIPIGDDNSGRGKPVVTWILIGLNILVFVFLQKFALDDYATLALAAIPEEILSGHRLFT  
LITSQFTHAGFMHIIGNMLFLGVFGDNVECRIGKLRYTLLYLISGTIGILLQIFFAAIAG  
GAALQMPLVGASAAISGVLAAYLALFPGNKVVVLLFYFIPTRLSAWLVIGFWFFLQVLGG  
LSGLTSLQDGGTAYFAHIGGFLSAYIWARMYKRKELEHIIHKWRRRNPSGASDGFNWWIVD  
DN\*

>SPBDM4\_v1\_50799|ID:27159162| HAD-superfamily hydrolase, subfamily IA, variant 3 [Uncultured spirochete bdmA 4]  
MICALLFDLNTLYSEASGLETGVAQRMNQFIANMFDLPVPEAIKFRREHAKPYGTTLEW  
LMRERGFHEPERYFQYIHPEGEEDCLEPDHVLRLMLNEIHLPKAVLTNAPLEHAQRVLKR  
LDIADCFTGVYDIRFNNLVGKPNPDAYLRVLRATGFSCLKETLFDVDDLKPKYVKGIDYLDLGGQ  
AVLKDEMNRFAFPCRRRIKTVYEIAAVLEQLGLPV\*

>SPBDM4\_v1\_50800|ID:27159163| putative ABC-type transport system, permease component [Uncultured spirochete bdmA 4]

MSGTAAVLADILKYTIVAATPLLFASIGGLFSELAGMLNIALEGLMGIGAFFGMAAAGLT  
GNVFIGMLAAIGSAVAGSLLMGTVTIKFKANLFIITGLAINLLAGGITAVLSQWWYHTKAV  
VAFTLPPPVPAPPAALSQIPFVGPVLFSSHVLTVSAWLWAIVAAFIKNRHRGIRIQATG  
MNAQAVSSLGYSPPDRARMAALVWSGVGSGLGGFALGVSVSFAFVFNIVSGRGWIALVAIYL  
GRKKPLWIAASCLLFALSELSNYIQGFSSIPPLLVLALPYAVTLVSLIASGNKR\*

>SPBDM4\_v1\_50801|ID:27159164| putative Glucose ABC transporter permease protein TsgB13 [Uncultured spirochete bdmA 4]

MPAERELHSPARVMLAVGVSIASLAVVLAFLSKDFGSALEQFFLEPFSNRYFLGNYLADA  
VPLMIAGLGVLIAFRSKNFNLGGEGQLYASALAAGVLAALLLPAGTAPFAVWFLAALTGVL  
TGAAIGALSGLLKAVRHVSEMISSFLISAIVINISDFLITGPFQDPASNFQTTTRQIAPQF  
LLPRILAPSKLDISIGLALVLIVAFMIVDKRTKIGFELKICGENEEFARYCGIPVAAAYQI  
AAMASGGMYGLAGALLVIGPQGRVMRGFSSGLGWSAISVALLAQGSGAGIVPAALFIAP  
LGTGSDHVMIGSGVPSEIISILQAAAMFFITARSLPRIWKKRGQS\*

>SPBDM4\_v1\_50802|ID:27159165| putative Uncharacterized ABC transporter ATP-binding protein YufO [Uncultured spirochete bdmA 4]

MQPMTAVRMREISKRYLPSGVLANDGAELEVEQGSIIHAIVGENGAGKTTLMKVLAGLELP  
DSGDIEINGEPHTHISSPAHARALGIGMVHQHFLMFDELSAAENIFFGLEPVQKPRLLRLL  
GIIDSSGLNEKAKSLANEYGFSDPSAPVGALSISTRQQIEILRQLAREMRILILDEPTS  
VLTEQETEALFEKLAEIRHMGRITILLVTHKIDEVMQIADKVTVMREGKTIGTYSVASTSA  
NELASIIIMGGVPSEEIQIHKEHAIKGASVMRIEGLCTHRHHRGGVGLSEIAFDVHAGEVL  
GICALSSNGLDELEDVLAGFLVPSAGRCAFGGLHFDVRKVHEYYRFLKEGKISYLPDRM  
RRAAALSLPVRDNFIALSRNYFSRGWIRSTLARRATQEAIIHAFDISAQPEQMTAELSGG  
NIQKLAIARLFSKEQPELFIPTWGLDIRSTEQVHSRIREVQNAGSAVLLLSSDVDEI  
LTLSDRVMVLVRGKQVLTRENSGYLNRALIGEYLLGTRSA\*

>SPBDM4\_v1\_50803|ID:27159166|tpn| Membrane lipoprotein TpN38(b) [Uncultured spirochete bdmA 4]

MRRYIIACIITIVAGTALWAQAPRIGVFVPGAREGSPYDNLAKGAERLASEIPGASVRV  
IEAGFNQAEEWEEKLTSFVASGKFDIVITSNPSMPELVNNISKSFPKQKFICLDGYLAGNP  
NLYTALYNQLEQGYVTGYLAGLVSISGMKGTNQDKKIGMIIGQNYPMVKMIIPGFAQGL  
KAVDSAFQLDVRVLGNWYDAAKTADLSRSLYAGGADIILPICGSASQGSVKVAQETGKYL  
VFFDDDEFARAPENILGCAVLHQEELAYRSLKAALLEGTLPGKADVVMKEGYIEFLNKN  
PSYIRNVPEISIRKKVDAVIQSIKSGQLTFQVPSL\*

>SPBDM4\_v1\_50804|ID:27159167| putative Mercuric resistance operon regulatory protein [Uncultured spirochete bdmA 4]

LTDQLLKIGELASLFGVTARTIRYYEELGLIEASNRTEGLHRRYPSDVIIRLKRIGELKS  
LGLTLGQIREFFILCAEDPSGERCRLLLQIYEDQKEEEMAKIREAQQHARIEKNIVAT  
KEKKSFFSFCPEGEECETCDLDGFCLDSVYNHDK\*

>SPBDM4\_v1\_50805|ID:27159168| Theronine dehydrogenase-like Zn-dependent dehydrogenase [Uncultured

spirochete bdmA 4]

MKAAVLIAPGKFNIEERPIPEPKENEVLKVEACGICTLEQRLFSGAMRLPLPLVPGHEA  
SGRIEAIQSKVVEEMVPGQRVALDLVERCGECYYCRIGKSNLCLNRYKDAARMLGGFSEY  
IVVRPNQIFSVSDSVSYEEASFAEPLACCIHSLKRLKVAMTEDLLIVGAGTMGLLHLLAG  
RSMGLRITVSEPN SARREMAAALGADFVIDPKATDISGFGRDITDGIGFSSCVVTSPSPS  
ALEPAILAMAKAARINIYTA YEDVMHIPLDLNTIHRNELLITGTEGRGQEDFFQAVRLLS  
FGKIDVNPLISARTSFSGLEEGFRIALS GDAYR VLLMHSML\*

>SPBDM4\_v1\_50806|ID:27159169| Pentulose/hexulose kinase [Uncultured spirochete bdmA 4]  
LILAVDIGTTRVKASLFDPEGR CAGLAAVELTESTS NSYNEIDARLWLRALSDISSQLLS  
ESVRRELNAIVVSGNGPTILPIDARGEPLANAITWLD RRAQEEAKEASVALSYPLDAAFN  
LPKILWLRRHSPQVYASSRFFVSCPEFVIGHLTGEWTTCLPNEG YTRIIWDAVALEALS  
ETEFPPFAGIGEIVGRV RASAADEFGLPQGLPVVMGGPDFIASLLGTATVRPGRTCDKG  
GTSEGINLCSEKDTGDAGALLVM PHVVKPYFNISGVISTSGKALS WFKSRFSPAEDFDAT  
YRRVAATKPGAGGLVFLPYLAGERSPHWDPDARGVFLGLGLHHD LGMMERAVLEGTA FAM  
REVLDV METAGARVEDMRATGMPSLSPVWNQIKADITGKRVMV SDFSEPELAGCLAIGRF  
ALGESSLAAA AERVFP AHIFEPHKEMAPMYDDLFAIYLESYRRLAGL FPAVSKLQRQM  
EVPVRHV EEP\*

>SPBDM4\_v1\_50807|ID:27159170| DhnA-type fructose-1,6-bisphosphate aldolase-like enzyme [Uncultured spirochete bdmA 4]

MNEGATLRLRHIFSEG GRAVVVAADHGAIAGPLRGIESPLEL VRLCAQGGADAILAHKGF  
VRAGLEGWGRGVGLILRMSGGFTTLGGRFEEELLYD VDDALMWGADAAAITVKFGHAREG  
EFIKAAARLVSGCERRGVPVMIEAMAF EKGRQSLRADALAV ALRAAEEIGASFIKAPMPE  
NIEDFARVARGSHVPILLGGEQRDSLQALFENVARALELGAAGVAMGRNIWGQPDALGV  
LEAVVGLVHRGWGVEKALARVRNIA\*

>SPBDM4\_v1\_50808|ID:27159171|pduL| Phosphate propanoyltransferase [Uncultured spirochete bdmA 4]

MPETKVIVNLSNRHIHVSHDDLETFLGKGYQLTKTKDLIQPGQFACAETVTIKGPKGQLE  
GVRILGPERKETQCEILASDVFKLGVP GCPVRESGQLEGSFPFEVIGPKGSIKKERGLII  
AMRHVHFDPEAAVRFGVVDKQIVALKVGTERGAIFLN VVCRVNAIYALECHLDFDEGNAV  
GISSGVMGEIVQV\*

>SPBDM4\_v1\_50809|ID:27159172|upp| putative uracil phosphoribosyltransferase [Uncultured spirochete bdmA 4]

VSKVILKAEDLDGYLNAGDLE YLSR METLYRHAMVSFNILATSTSESQKHREEQTLIDLY  
NRMGSLMQEICAAEPRIQVYSFVSPQETHGEVSR LIAKLRD VDTGRQEFVYYIQRAFELL  
FTLAFGGSDKASKNYLIVRTPVTIPVQNFAVHKIPNVDEAVRDTVMCVM LRGALLPSMIL  
SKEIQEYSSSGYLTPFALFKIKRDDTKSETTMEYVLDLDHSYFDLAQLDGKHL LFADPMN  
ATGGSLVTVVKYLLDQGV RPASVKFFNVISALK GSLRVVRAIDNITIYTLWMDPSLNERA  
YIMPGLGDAGDRINGTDEDVYPRDMLRLVADYGTNIAGLYRSQLR III ETVLRHR\*

>SPBDM4\_v1\_50810|ID:27159173| putative NAD(+) diphosphatase [Uncultured spirochete bdmA 4]

MTSLPRRF AVFQGDCLMPRH IAGHLQSSADGSAVSSLLPETVSWPASEIPEL FSGMPE  
GYSYSAFAFENIVYGAVLLKDDEAHFVESAGL KNGVRFVVRNLALNFSSRFGRFVLF AKA  
HAQWASVSRFCGACGSPLVDANGNDEVREPLDDHAHGARFCPRCKRIFFPRMSPAVIVLV  
RKDNAILLEHNVRFPGNRHSLIAGFVEIGETLEEAAVREIREEAGIEVKNLQYVRSQPWP  
FPDSLMLGFIADWASGEARPDGVEIDHLDWYTANNLPEMPMRGSIARYIIDTFAAGGFSA  
T\*

>SPBDM4\_v1\_50811|ID:27159174| Na<sup>+</sup>/glutamate symporter-like protein [Uncultured spirochete bdmA 4]

MDFSWKIIIDAGIISAGLVLATFLRSKIKFLQKYLVPNALTAGFLLLPVYNYLLPPMGYA  
TNRLGDLVYHLLNISFISMSLRSSPPKIKGSR SNGGVLGMSAVILFGYASQAILGLLLTL  
LFLPKIHPAFGLHLPLGFALGPGQAY AIGKGWESMGFE GGSTVGLTFAAIGYLWACFGGM  
LLIHKGIRKGMKPEQISIMTDKALLTGLIPRDREKPSAGRLTTDSE AIDSFSFHAAFVI  
FVYLLSYLFLKAVTFFLGFAGKTGMELATNLWGINFIFSAIIAIIVRKIVDALKLG YMID  
DDSLTRISGISVDYMVAGALGAISLVFVGKYWLPILLMSTLCGLMVYYTIPWVSSRIFRD  
FRFERMLMLYGVSTGTLSTGLALLRVM DQEFKTKVSSDYMLSAGLTFVLALPFILAINLP  
AKAYTTGSMTPFWMFVLLAVGYLIFVSVIYWILARKRRFATPGENFYRPGK\*

>SPBDM4\_v1\_50812|ID:27159175| protein of unknown function [Uncultured spirochete bdmA 4]

MILKRRYHPTNFKFFTLLRHTYGIWLRW TYRITAINAELFKTLKPPFIVVGNHTLLDP

FIANSFVFPPIHWVASDGNMRNPIMRFLLLKLVGSIPKSKAIPDIETVNWIVDIIRRKRS  
VVGMYPEGQSSWTGTPFAFFSSAKLLRLLRVPVVLAKTNGGYLTKPRWSHVRRPGKVEI  
SFSVLFTPEQLHKMPLVEIDVALNNALSYYDDTAWCRQKGIQYKSSRGAENLELALYICPS  
CGGKATMHGRGNVFACDRCGFSVEYQADGSFALNPEEPQRALISPYDALPFLDSIAVWDN  
SQSAFLSKELS\*

>SPBDM4\_v1\_50813|ID:27159176| Smr protein/MutS2 [Uncultured spirochete bdmA 4]  
MIAVDSSQNKKARAACQAISSSPVKQIGFCDMYSGNMDFGKIYEQWEKQQTSRKKSSER  
APGDKSGAEAGAFRETLEQWLEAHEPIDKDASTERRTGNDKSAKISAYTRFKRLQPQDEL  
DLHGMRETEARLAVQSFIARCAAKGLEKVSIIHGKGNHSREEQVLVRVVREELERNPHAG  
KFGFADNQHGGRGATWVRVRQAISRDK\*

>SPBDM4\_v1\_50814|ID:27159177|infA| translation initiation factor IF-1 [Uncultured spirochete bdmA 4]  
VAKEEAIEVEGIVKEALPNTMFRVELANGHILAHLSGKMRKHYIRIVPGDKVKVGLSPY  
DLNRGRIIYREK\*

>SPBDM4\_v1\_50815|ID:27159178| Transcriptional regulator, TraR/DksA family [Uncultured spirochete bdmA 4]  
MENAFIERMKNLLLAQRQEILDIAESNEQLRTVLSETDPKDSADIASDDVDRIMIEALS  
SQDLKRYRAIESALLRINQGRYGLCAKCGKKIPQERLEAIPYAVLCVECQKSDERKNR\*

>SPBDM4\_v1\_50816|ID:27159179| protein of unknown function [Uncultured spirochete bdmA 4]  
MLVRPDVRWSMGVISNGYSYALVMHSLQDACRRIRFTVLAAGDPAGIYFGDQVFLRGEVY  
CLKCRVDIGWILLVEPSPICILFYQIKVTDYIEPATFNHFGHILPIPPPNSSVIAIRCP  
MANFKGKLLLRLIDGEEGFPGSGNVMDRANA VIEMERFIRGVVRHRYPGSVVGLKAQEYL  
HPSWRIFLGERAHRNIGFCTLPRQIPPRFERNRCMGRKAQMRIMMFESGIRHCAGVCLT  
IAERRVSVKTKGHGSPSYHSARIDATGALFY YEAMDEPAVRTIAL LISDREKSEKIARFLS  
RRKAGVKIFDQERTAAPGSAECVIAEAALLDSGGARELLDASVALIVLGNMGKSQKHLQN  
SPLL RIMPARSSSTSLYGAMLQLCAVRDLIFASRTVVNAVQNQLRTLSSVPDIVYILDE  
RGNFIYLNESA VLLGYEPSELIGKHFSIIHPEDKPNISRDIVVEKIRQANKFPDIPPKL  
FDERRSGQRMTRDLEVRLVHKDGHVVYALVNAVYGERNFDMPLLSDVVGQNPQTIGVVHDV  
SAMHFYQQSLED SLAAKERLLREIHHRVKTNLQLVASLAHLKQTDGASSASAEV LRELEA  
QIKSIALVHEALYQSEQVDRVSAREFFAQFCHAAEEALETVGSTVHLRLSADDCSLDPDR  
LVPLSLALLELLGGAYQTA YEKRAEVTVLITFRCADGKRRVLEVQGE GIMRKADSPIMRA  
LLKHANADFEVIEGKSPHECCRLTIERQY\*

>SPBDM4\_v1\_50817|ID:27159180|trxB| Thioredoxin reductase [Uncultured spirochete bdmA 4]  
MSQLYDFAIIGAGVAGLAAAQYGARANLNTLVIEEMAPGGQALLIDNLENYPGIAEPING  
YDLSDRMRTQAERFGSSLMDASASNLRKENGRFIIETSNGPVESLSVLVATGAKHRRLEI  
PGEQEFIGKGVSYCATCDGPFKGRMLVIGGGDTACDEATYLSKLSGQIVMIHRRDRFR  
AQKALAQRVLTNPAIEVRFNTIAKEIRGDTKLRSTVLENVVTHEIAEPPFDAVFVFGSI  
PQTAFLVDTGVQIDETGYIITDCTMQSSIPGLFAAGDVRATPFRQLITAAADGAIAAHS  
ANYIDEQRGQAYR\*

>SPBDM4\_v1\_50818|ID:27159181| protein of unknown function [Uncultured spirochete bdmA 4]  
MWVNDRIASCQKAIRRFLRERECECVRASEELHRCLLSPGQQSVFSVYIHLPEECAPSF  
RVDGLAIQDPDGAVCVLLPRSSQKDLELAARLKL RGNVYKIAGIMQDVRRLVLA VDEGEW  
NNQSFMLMRARGEDIPFGVAEEAGGPTRGSRVVIRNATIEDLDALLSLHMA YEREELSLE  
STQAETEMRMTSLRQQIVAI AFCGDEPIGKINTNARGYFYDQIGGFYVKPECRSMRVGG  
SLFFYLLHKIAAERRDPVLFVRHENVPAISVYRRAGFQPAGEYGMSTMSSTRRLS\*

>SPBDM4\_v1\_50819|ID:27159182|rnhB| Ribonuclease HII [Uncultured spirochete bdmA 4]  
MKRSTNFCTLD SVLSIPVELVCGLDEAGRGPLAGPVTAAAVILPADFP MALLDDSKRMSA  
RRREDA YEEIVERALDWAVGWATIEEIERYNILGASLRAMERAFAGLTQAPALVVVDGIF  
APNLWMNGTCVEAATMAKADGLVPAVMAASILAKVARDHLMDCDLTLMPEYGFRSHKGY  
TKAHRKAIERCGPSRFHRQGFQLLPQSSLLFDSFESED\*

>SPBDM4\_v1\_50820|ID:27159183| Phosphoglucomutase/phosphomannomutase alpha/beta/alpha domain I  
[Uncultured spirochete bdmA 4]  
MPLITHPLLGLAVGDPTKIPLARETL PSPQEVQLAAHSLILSASGWRTICANASATASYA  
SWDLDHSPENSLSRDLSPADTAIVAGMALVFSAFMKKCKGRRPVVLLGVDTRPTGPAIA  
DVFARVLIGGGCEVRYLFIVPAPEIMAYSAQTTS LPSGHEFHSDGFAYISASHNPPGHNG  
LKFGIGGGVLTGEQIAPLITALKAFIANSEAPELALSAIEKTDLRELAACYGNVAHWKRY

SQSAYMLFAHRVFTDESELDAQEKMLSEIAAACAERPLGVIAELNGSARTQSIDFDWLSA  
LGIQVKVLNAEPGVFAHRIVPENESLQDCSESLNEAHAENAAFALGYVPDCDGDGRGNLVY  
YSNALQGSVPLEAQQVFALVCLSELAYLRWKGETRPIAVVNDATSMRIEAIARAFGARV  
FRAETGEANVVS CAERLRSEGWVVRILGEGSNGGNITYPSKVRDPLSTIGSMIRLLRLGQ  
AKKGNTCFSLWLEAIGAPERYPDYGLDDVIASLPPWATTS AFEPYAALKTA AKDKIALK  
NAYQSLFLEAWPQMLPELTDRLGIASWRAFATIGPREHEIGADFGASENGGLRIVLYDEQ  
GASCAFLW MRASGTEPVFRIGVDIKGGTGADEAWLRGWHTNLVTQADLLVAHSQNVVG\*  
>SPBDM4\_v1\_50821|ID:27159184| conserved protein of unknown function [Uncultured spirochete bdmA 4]  
MIGVFEHALFLLRGVKTYALVGSSGTGKSFRAKLVAQKYGVLDLIIDDGLLIRGDQILAGR  
SAKKDPTYLGAVKTALFDDREHREQMSRALQHERFRKILVIGTSERMVQKICERLQLPH  
IKVIKIEEATKAEIEKAVQSRKVEGKHVIPVPALEIKRNYPSIFYDSVRVFLKRSFGVG  
ATSPKLYEKS VVRPEY GKRGRVAISEAALSQM VVHCVNEFDPNVRIMRLAIRNDTQGYRI  
TVMLEVPFGTRLASKIYALQEYIVDSIENFTGILVAEVNIVIDRLAAR PQKEQKWSRAID  
AHRQSV\*

>SPBDM4\_v1\_50822|ID:27159185| protein of unknown function [Uncultured spirochete bdmA 4]  
VNQNLHENKRLSLATKGQPPFRTIGAARLFAGFMPVQSSFLFSLVRRYFLELSLSTTGH  
YSPWKRLQNYC\*

>SPBDM4\_v1\_50823|ID:27159186|buk| Butyrate kinase [Uncultured spirochete bdmA 4]  
MPFIVLVINPGSTSTKFAVFSGDTCIFDQSLSHSVADLAGFPTVASQYEFRRERAIRHALE  
ERHFDLKT MNAAVVG RGGLLHPIPGGVYRVTEAMKSDLLSAQYGEHASNLGGLIADAFARQ  
LGVPAFIADPVVDELEDVARVSGHRLFKRISIFHALNQA VARRYAKEHKCRYEDLNLV  
VAHMGGGVSIGLHRGGRVVDVNQALS GEGPFSPERSGTL PAGDLAKLCFSGRYTQQEVLK  
MIAGKGMV SFLGTNDMREVS RMREEGNREADLYYRAFVYQV GKSIGGAAAAAHGVVDAI  
ILTGIAFSKDLTD RITEMVSFIAPVT VYPGEGEIEALALAGRMALSGETEIKEYLP\*

>SPBDM4\_v1\_50824|ID:27159187|ptb| Phosphate butyryltransferase [Uncultured spirochete bdmA 4]  
MNHISEIEKAKTLGRKLA VASAQEA SVLEAVADAYREGIAESILVGD TAAIAAAAREA  
NNGKGVDISPFRIVEESNPNA AAAAAEAVALVRSGEADFLMKGIIDTSLLLRAALNKETGLN  
AGRLASHVAVMEVPTYHKL FVITDAALNIAPDLPAFVDIINS AVMVANALEVKTPKVALL  
AAVEKVNPDKMPCTVTASILTQMNRRGQIKNCIVDGPLALDNAISAESARIKKIQSEVAG  
DADILVTPDIEAGNILYKCLLDLAGAKGAAVIMGASVPMVLT SRADTAETKLASIALASL  
LGSKGLRA\*

>SPBDM4\_v1\_50825|ID:27159188| conserved protein of unknown function [Uncultured spirochete bdmA 4]  
MAIKGSVEIDRERCKGCQLCIRACPTKVLGADTEPNSWGYFPAKAI AADKCIACGNCFV  
CPDVAITVYKL\*

>SPBDM4\_v1\_50826|ID:27159189|vorB| Ketoisovalerate oxidoreductase subunit VorB [Uncultured spirochete bdmA 4]  
MAEEIRLMKGNEAIGEA AVRAGCRA YFGYPITPQNELTAYMAKHMLAKGRIFIQA ESEVA  
AINMVY GASSTGARAMTSSSSPGVSLKQEGISYLCGADLPAVIVNVARS GPGLGGISPSQ  
GDYFQATRGGGHGDY YTIVLAPKGVQDAADLT YEAFSISEKWRVPVLVLADGLIGQMMEG  
VVLPEPIDPATLPRWQWAVGH SVEMGRPYNHVSSINL VPDELEA ANRKR FARYGQIKKEL  
LRYEEIEVEDADV FVAYGTSARVSHGALEMARAKGMKVGLFRPVTLWPFYARLLELAE  
KGRFLCVEMSMGQMVEDVRLAVNGKAPVYFYGRCGGNIPSQEEVFAEVARLMGK\*

>SPBDM4\_v1\_50827|ID:27159190| 2-oxoglutarate synthase [Uncultured spirochete bdmA 4]  
MELVYGHPKSLKPIQTKYCPGCGHGVHRLIAEVVDEMGLQTKAIITNPVGC SIWADLYF  
DFDSVQPAHGRTPAAATGVKRMLPDHLVICYQGDGDLAAIGTAEIIHAANRGEKFTTIFV  
NNAIYGMTGGQMAPTTLVGQHATTAP EGRDPIVAGMGYPIRVCELLSSLEGTRYLARGSV  
NNMVNIRKTKNYIRKA FEAQMRGEGFTMVEILSQCP TNWQMNPVESVEWLEKNMITYPL  
GEIKNTLSTAPAPAQAH\*

>SPBDM4\_v1\_50828|ID:27159191| Pyruvate/ketoisovalerate oxidoreductase, gamma subunit [Uncultured spirochete bdmA 4]  
MTEKTFMAGFGGQGIISLGQLWVYSAMKEGLKVTFFPFYGAEKRGGIARASVIVSDSEIK  
SPLVTSADSVVMNQDSVEIAEKVCKEGGTIFVNSSLVKTD PARPDAKIVHVPCNDIALK  
LGDVRIANMVMMGALGKVTGALKLDKLESILKGFPPARKHSLISL NIAAMEEGKKA VT\*

>SPBDM4\_v1\_50829|ID:27159192| Glycosyl transferase family 51 (modular protein) [Uncultured spirochete bdmA 4]

MKIHSSAGGKNTERP KPKRPVIRVLRIVLLSILIEHGVYIGITSALIFVYKFANPPTTVL  
MIYRSLVSHWKVQKPIPLTTAQIPTYVRRMLVSVEDGKFYEHHGVDMEAFKRARELNQKI  
GQPMYGGSTITMQVARTLFLVPDKSYVRKYLEVIAALELELILSKNRILELYFGYAEWGE  
GIFGIERASRVYYGKGIASLQVDQTARLIALSSPIKYKPSLYRSRILRQRYEFLVQRY  
VAPIAETTLAPDNPPPGLLEPSADIETPEDVFSSEPAENGQEILPAPETSTQEVTPEETT  
PQETTPQEEMPQDTPVPPGVLQ\*

>SPBDM4\_v1\_50830|ID:27159193| conserved protein of unknown function [Uncultured spirochete bdmA 4]  
MARHKRRASIMSAGMDKSPENNPVDGQNAHGCHTLTIWADADSLPKDIRPFLIKRAWTRR  
DYEDIRVLVQFVAARAPADIPREFLVLVEPGEGAADRYIEAHAAPYDIVVTRDIPFAERL  
VGRSVHAMNDRGDTFTTENIAERRSLRDAMVSLRSAGLAPPSPKNSQRTQTETKHFADAL  
ERLVVRAVRGKKRNDQD\*

>SPBDM4\_v1\_50831|ID:27159194|manA| Mannose-6-phosphate isomerase [Uncultured spirochete bdmA 4]  
MQKDHQRLPCLAHLENAVQYAWGDTQGILPFIDAHAGPGYPIGEVMGSHGRAPSKLRL  
DAGSLPLDELIRQAPRHWLGDRVADQYHELPLFKVLAAGSPLSLQVHPTLREAREGFAK  
EERAGIPLSAPERTFKDSNHKPELAVALTQFQAMAGFRSPGEISALLGPDLCDAFNFKGQ  
KPEELRSFVRQVFSIKGDAYQTYETGLRVRSEGLLHSNSGKEREAAAMVLDLQSLYPHDP  
GQFGPLLFNINLEQGEGLFVPAGVIHAYVKGSILEIMACSDNVIRAGLTIKYIDVDLLC  
DILKPHAKPALIRPEYERFDWGSRAVYATPASEFRLECLEVQANSPSTGISYSPFGPEIL  
LCTEGGFHLRAEELELRARTSCFVAGSCAKITLEGQGVWRATSGGQAS\*

>SPBDM4\_v1\_50832|ID:27159195| Helicase c2 [Uncultured spirochete bdmA 4]  
MGKKHGA VVDAGTRFSSETQDKLRDAILGMEGREVFAIGSLDASGMVQNLEIVARGTEGA  
VAAPFRYRTHAQVLIHNHPSGTLFPSDADIAVAEAGAEGIGSYIVDNEVSQVLVVAEPA  
RFKTIRPLNAEEIAAVLDTDGKLSRVMPEFEARASQVDMAHDTVQVISDGGILVAEAGTG  
VGKSFAYLIPALAWAIGNSERVVISTATINLQQQIFKKDFPIVSSLFKKPAKAAVVKGRG  
NYLCRRRLYEAIEDALFSDSSIKLRQILEWDNNGSGDKADLSLPDDDPINRVCSEGD  
YCLSSRCPHHDKCHIMRVRLEAASAQLIHANHHVLLADLEAKRTREGSLNTILPSYQALV  
LDEAHALEGSATGLFSETFSKRSVQRLRLARLFRKRAQAGILPSLYRLPDVPPAFIDTA  
RSQAEEKAGAAVDAFNAAAIAAFPEKESLLVRSLNGLNRTAFLSALQNLERDVVMLVTRL  
DEIFEAISPELEDEESVIDLRLTMRSLQEAAALIPRKTPEAEPGTIFWLQIDHRNPRET  
IVICTATPLEVAPLLAERLFSKIRSCICTSATLTINGSFRWWRSRAGLPGKHVEATYLS  
TMSEEPSLLQNTHILEKSYSPFPYSRHAMLADTSAPLPDASQFQSYLNDVTKLLHAS  
RGRALVLFTSHKVLRTDYDAVAPLLEKEGILALRQGQKDRYSLLHTFIHDISSVLFATES  
FWEGVDAPGETLSLVIITKLPFRVPTDPIQSSRAAAIDARGGNSFVEMSIPEAVILFKQG  
FGRLIRHSNDRGVVAVLDVRIAKKTYGNLFVASLPKCRLETGPLDQICTSVAEFLDDER\*

>SPBDM4\_v1\_50833|ID:27159196| protein of unknown function [Uncultured spirochete bdmA 4]  
MARYVQPSWRSM PAEDSYRHSRNEEKDSYVRALAKLEQEDEEISLP SERGPVFRDGVFQ  
IDMSRVEEKGDIDVELKKLIDSIMGSKEGT\*

>SPBDM4\_v1\_50834|ID:27159197| putative ROK family protein [Uncultured spirochete bdmA 4]  
MTQEEQHPERAHLIRERNQRLVLRILFRLGSLSQSKAVQCTGLKAPT VFRIFSSLEQRGL  
IEAVPVPDAYASKHRRKGRQPVYYRIRANAAVVGVDVFWARSAAAIQDFAGNLIAERTV  
CFASPPSAEGALELIANLIRDMLAESAIESDKLVGIGVGAPGSVRATTGVVQYYARIPGM  
TEFPLAQLRKRFSVPVVVTNNASIVALAEHRYGQAYGVSSLFLFLVRAGVGGAFIQNGK  
LVSDRSRTAFEVGHLSVDPAGPACSCGNRGCLELYLNEDTVCSALSHIGSCTGIEDAERI  
LSENRRGADAALAPILEASTHAVRDIRLLAPEAVVIVTRSKCLSERLAKDASVDFMRND  
QRFGPPEAKIIASEYNPTLACKAACDLIYEEYFAHG YEFRNSGMTAE\*

>SPBDM4\_v1\_50835|ID:27159198|exoA| Exodeoxyribonuclease [Uncultured spirochete bdmA 4]  
MIKSYSWNVNGLRACAQKGLLEWVEASDADFICMQEIKLQEPQLTEDLRHPVARSGVRYH  
SFWAFAERKGYSGTGFYALREPVSVSGLGIPEFDLEGRAVVADYGDFVLVSA YFPNSQEA  
GARLDYKLRFCDAMLKFCDRQRVKGKHVVVAGDYNIAHTPIDLARPEQNEGNAGYLPEER  
AWMDQFVSEGYIDTFRWFCKEPGHYSWWSYRAPKAREKNIGWRLDYHCVDPEFAPALAAA  
DIHPEVTGSDHCPVSLFLDI\*

>SPBDM4\_v1\_50836|ID:27159199| Peptidase S54, rhomboid domain protein [Uncultured spirochete bdmA 4]  
MRIRYNAPVTLTFTLLAAIVLILSQTIANPNIISFFSTPAPFRTNVFDIYIKLFTHVVLGH  
ENIQHFISNFTMILLGPILESVYGSGLLLSILITALATGLSNALLFPHVLLGASGVV

FMMIMLSSITNFSKGEVPLTFILIMIVYLGGQVWDALTKQDNISQFSHIIGGLVGSALGF  
YHKK\*

>SPBDM4\_v1\_50837|ID:27159200|kbl| glycine C-acetyltransferase [Uncultured spirochete bdmA 4]  
MYGRLKEELTQKLDTIRADGTYKDERVIVTAQGASIRVSDGKEVLNFCANNYLGLSDDSR  
IRAAAVEAMQKYGYGLSSVRFICGTQAQHKELERSVADFLGTEDAILFSSCFDANGAVFE  
PLLEDSAIITDSLNHASIIDGVRLCKAKRWIYKHADMRDVEETDPETGKSLKGLERCLK  
EARGSHVIMIATDGVFSMDGDIANLNAICDLAEHYDALVMVDDSHATGFMGAHGRGTWEH  
CGVAGRVDIITTTFGKALGGASGGVIASRKEIVEYMRQKGRPYLFSNTLAPAIVGGTLRA  
LRILTESTELRDRLETNTKLFRLMTEAGFDIRPGEHPICPVMLYDEKLAHRMADDLLDE  
GIYVIGFSFPVVPK GKARIRVQISA AHSETQIRAAVGAFFKKV GK KLGVI\*

>SPBDM4\_v1\_50838|ID:27159201| conserved protein of unknown function [Uncultured spirochete bdmA 4]  
MLFRDRCDGTRVTGQHALNALMPYMMRGRNESAVYYEKEINIENALAYLKALKMTQEEKA  
DQDRFTLFLIITAALKTMALYPRLNRFIHRALYQRKHMFTSFIVKQSFDPDAPEVNAK  
IFFEPDSSFQTVSSKINAAILDAREHGEGDGERFANIFHKIPGGKAILMALYRFLEHFNI  
APWSLIRMDPLYSSIFYANLGSIGLNAPYHHL YEWGNTSIFM VIGKMF SKELWHGGVTRTR  
QRYIDVRLTLDERIADGYIFAEAASAFYRMLSNPKLLELPLDMLRNALG\*

>SPBDM4\_v1\_50839|ID:27159202| Ring-hydroxylating dioxygenase, large terminal subunit [Uncultured spirochete bdmA 4]  
MIPNQWYVVASSNEVSIRPVG MTRFGEKLVLYRTSSRFLVCLSDRCCHRGAAALSKGKVCN  
GDQIQCPFHGLEYPDSPGKCTVIPANGRSSPVPSNFKVRSWPVYEAHGFIWVWYGTDLVPV  
EIEFFDDIPDGARYATVADHWKAHYSRV IENQLDCVHLPFIHHTIGKGNRTL VNGPAV  
EWISDHKFFMYVYNEVDQGQKPKKPNEVSVSPSPSGYKIEFLYPNLWENRIADKVRVLA AF  
VPVDDENTLLYLRFYQAFARIPLIGNLVARAAMPFN VYVAHQDRRVVQTQEPKASALKIG  
ENLFQGDFFILEYRRRRQELQDKGRGWGPKHLGRPSRN\*

>SPBDM4\_v1\_50840|ID:27159203| Cupin 2 conserved barrel domain protein [Uncultured spirochete bdmA 4]  
MIKASERVFETRHEMRGGKGEVSLAQLPGDALAPHLRLLSEL TIPPAGIGITHAHSGET  
EYFYILEGIGTVNDDGAIKAQPGDVVVTGGGAIHNIENHTNAPLRLIAVIVTEA\*

>SPBDM4\_v1\_50841|ID:27159204|racX| Aspartate racemase [Uncultured spirochete bdmA 4]  
MNPILPAGKGNLDYYMRDLETICTEPVVVYNSAMGNVIGVVLGGMGPDATAAFFSMLVR  
LDVAGSDQDHVHIIVESDPSIPDRTRCLLEGGPDPLPAMLASARRLVAAGADIVGIPCMT  
AHAFLPRLRRNCTLPILSAFEEARKALDAFSPPIRSLGILGTMGTRRARLFETTMPDKTI  
LWPSEEDHRSLVMEAIYGTHGIKAGNLGDEPQRLLVKAAHLLIDRGAQAIVAGCTEVPLV  
LSQKDFDIPFIDPMHFLARALIAAARKGVPE\*

>SPBDM4\_v1\_50842|ID:27159205| Sodium:dicarboxylate symporter [Uncultured spirochete bdmA 4]  
MAEKKKRGAFDWFYFKNLLARILIGLVLGAIVGIILGFFPSSVKPFVDNSRFFGDLFIRL  
LKMIVVPVVLFSLIAGAASIAPSR LGRVGIKILVYLLTSAFAVIIGLVSANIFQPGAGF  
NIIGDAAVQGKQAAPPTIAQILLNIVPTNPFESIMKGDVLP IIFFSVVF GIGLSYIKDSK  
QQALAKSGAVLLDCVNAAAETMYKVVRGIMQYAPIGVFVLIAQVFAQQGPKAIGPLLMVT  
LAVYIGLIVHLVVTYGGILSVYKLGFGKFLKGANEAMITAFVTRSSSGTLPVTMRCSEEN  
LGVPRTIGSFTLPLGATINMDGTAIYLGVCAMFIGFATNQPLTLNQQTLVIITATLASIG  
TAGVPGAGAIMLIMVLESIGLKITEGSSVASAYAMILGIDALLDMGR TSLNVTGDLVGSS  
IVAKTEKELDMSKWK\*

>SPBDM4\_v1\_50843|ID:27159206| conserved protein of unknown function [Uncultured spirochete bdmA 4]  
MRLPSEGSILELVAVLPMNIRGQGIAWDRSDRGVIYGIIRATSQEKAAGGNKVTVFRLE  
DRASK\*

>SPBDM4\_v1\_50844|ID:27159207| putative tagatose-6-phosphate kinase (Phosphotagatokinase) [Uncultured spirochete bdmA 4]  
MALHHATFLCYILYMLQNKDIPRTEIFTGTSYGLSQIDKSPSFLCVCLNPVIQKTLVFKE  
IAPGEVNRTANWRIDAAGKGIIPTRILTQLGEKALHLTQLGGPTREWFLSMCAEDNIAIE  
WVESGAPIRFCTTLIEEAQGHATELVEESLPVAPCTSDALVDRFTSRVKAATAVLLSGTV  
ATGIAPGTMARFARLASEAGARLYLDIKKQDLLECLKFHPVCVKPNLEELAQTLGIPYAE  
VRDEVPARALVTETGKRFFGEYGYLVVTRGARPTLYWNGQTLCEEPVQPVAVKNPIGSG  
DAFGAGVARTLERGGSIDKAVREGTRLGGLNAAQLKPGTILS\*

>SPBDM4\_v1\_50845|ID:27159208|argG| Argininosuccinate synthase [Uncultured spirochete bdmA 4]

MKKKIVLAYSGGLDTTVIVPWLKENYDCDVIAVCGDVGQEADFEAIGKRALASGASKFLR  
LDQKEEFVKEYLWALVKAGTPYEKKYLLGTS AARPLLAKGLETEVALAEGADAIAHGCTGK  
GNDQVRFELGVKAFAPEMEVIAPWRIWDIQSREEEIA YLEARGIPVPMKKS DSYSRDDNL  
WHISHEGLDLEDPANEPHFEGMLKMCVTPEKAPDKPEYVTIGFENGVPVSVNGERLDPVS  
IVRKLNKIGGANGIGIADLVENRVVGMKSRGVYETPGGTIIMEAHDRLEQLCLDKKALS F  
KMTVAQRFAEIL YEGEWFSPLSKALCAFVDSTQNVVAGQVTLKLYKGNLIFAGAASPYSL  
YEASLASFTTGPLFSHKDSTGFINL FGLPTKVRARLGERLKKFGIAAGPDVVKPGSSGYT  
APAGD\*

>SPBDM4\_v1\_50846|ID:27159209|argH| Argininosuccinate lyase [Uncultured spirochete bdmA 4]  
MSRLWQTGEGEGLDPAVEKFLSSIEVDSRLVFEDIECSQAHAIMLGEQGVIPQTQDASTLV  
DELA KIRKELEAGLLQVDPGAEDVHSFLEDELTRRLGDVVGKSIHAGRSRNDQVAAAFKLH  
VRGACRRTRGLVQKAIACL DVAEENIETLMPGYTHLQRAQPVT LAHHLLAWCAGLERDA  
GRLADAAARADESPLGAGALAGSGLS VDRERTAGLIGFARVSTNTMDAVADRDA AIEYAA  
ASATLMVHLSRACEDIVLWASSEYGF AKLSPRASTGSSIMPQKRNPDP AELIRGKAGRIF  
GNLQALLVMEKGPYA YNRDLQEDKALFFEIEETVNGALGTFCVLVKSLEPDVARMRAAL  
DEGYLEATDVAEFLV KRGVPFRTA YQASKLLVARCIEEKSLRDITQADCTVHEAFGRAG  
VGAAELVQYLEPQACVARRMQTGGPAPLRVREQIERLRTWLASAG\*

>SPBDM4\_v1\_50847|ID:27159210|yugJ| putative NADH-dependent butanol dehydrogenase 1 [Uncultured spirochete bdmA 4]  
MDDFVFNPTMIYFGKSHETE VGRIASQYGRRVLLHFGGQSAERSGLLPLIRKELAGAGL  
TYFELGGVQPNPRLSLVYRGIELCRENKIDLILA VGGGSAIDSAKAI AAGVPYSGDVWDF  
YTGRAAPEKALPVGT VLTIPAAGSESSPGSVITKEEGLLKRAVNADCLFPRFSILNPERA  
TTLPSAQVANGVTDIMCHLMERYFTNSRPVEFTDR LIEATLRTVIASAPRVLANPTS YDD  
WAELMWAGTIAHNNLLNTGREGD WASHDIEHEL SALYDIAHGAGLAI VTPAWMKYALKHD  
VARFAQYAVRVWGAEDNYFDPERVAREGIARLEAFWRSV GQKVRLSEIGIDDSRFTEMAR  
KCTDGDTHSVGHFVPLH SKDIEAIYRLAL\*

>SPBDM4\_v1\_50848|ID:27159211|yggP| putative dehydrogenase [Uncultured spirochete bdmA 4]  
MKT KAVRLYGVNDLRLEEFELPPLK DDEILARVVS DSI CMSSHKLSMQGDAHKRVRAPLA  
QTPVIIGHEFCGEIVEVGKKWAYKFSPGMPFAIQPALNYKGT LWAPGYSYQYIGGDATYI  
IIPNEVMEMDCLE YKADAFFMGS LSEPVS CIVGAYHAQYHTKPGSYVHEMGI RGGGSLA  
LLASVGMGLGAI DYA IHGGIKPARIVVTDIDQVRLDRAQKLISIESARAEGIELIYVNT  
KDVADPVATLRDLNGGKLFDDVVFVAPVKPVVEMADKLLGH DGCNFFAGPTDPSFSAMF  
NFYNVHYESHMVG TSGGNTDDIRESLALMAKGLLRPESMITHVGG LNAVADTTINLDKI  
PGGKKLIYTHKKLDLVAIADFAERGKTDPLYVALARIT AQHDGLWCKE AEDYLLEN APEI  
\*

>SPBDM4\_v1\_50849|ID:27159212| Carbohydrate kinase, FGGY [Uncultured spirochete bdmA 4]  
MTDAIAVLDIGMTNKKVLYSTELSMIAEKRRIFPPLVREGLEI HDLAAMEEWFLQVLRE  
YSREFAIQALAVSTHGATFVCTDERGNPVAPCIYYTHEPSREFH DRFFALAGDRKELQAR  
TGTPDLSALINS AKLLFLRERYPEEFASARWILPYPQYWG MRLTGKPSAEGTYIGCHTF  
LFDWQQESYSSVADALGIRDKLP LPIQQA WDLGTIAPEVAARTGLSPGTPVTLGIHDSN  
ASILPHLASSGGRDFVLNSTGTWCVLMHPVEKYGFEPDELGKV VFFNRS AWNTPIKTAIF  
LGGKEYETWIIQI AVLQAKAPKNLLQPT EEDYERVLKERKYFILPEIVPGSGQFP GSAAR  
AVEGSLQCTLS DVEQGNIPSFLRDPKTAQAVLNISIVLQTEVALHRTGLKKSADILTEG  
GFRNNTDYNRL LASAFP DNSVYLTDLQEATSFGAAMTALAALKSIDPMEFSRLIHIEKAL  
VPPMLPSAALNAYRDAWRALI\*

>SPBDM4\_v1\_50850|ID:27159213| Short-chain dehydrogenase/reductase SDR (fragment) [Uncultured spirochete bdmA 4]  
VPLEPLDRRYRTAIQAPGDESLLASAARASVVRGKIAFVTGGAQGGF GAEIARGLAQSGAV  
VWIADINLPAARSFAQKLAAETDSPA VFAVDIDVSSETS VQRAFETVAQTTGGLDLVSN  
AGILKAGSILDQPVGDFRLVNEVN YTGFFNVAQHAARLLRLQWLGAPD WHTDIIQINSKS  
GLEGSNKNGAYAGSKFGSIGLVQSFAL ELVEYRIKVNAVCPGNFFDGPLWSDSQRGLFVQ  
YLN SGKVPGAKTVEDV RAYYEAKVPMRRGCYGPDLKAIYYLVEQVYETGQALPVTGGQV  
MLH\*

>SPBDM4\_v1\_50851|ID:27159214| protein of unknown function [Uncultured spirochete bdmA 4]



MKTTVSPSSIAPILRGLILSEASFSCMVKVR AEDQPCPKESLRFVADGILPNAEIDDGEL  
AAALKKALSPH\*

>SPBDM4\_v1\_50852|ID:27159215| conserved protein of unknown function [Uncultured spirochete bdmA 4]  
MNDLNDAKMIVADAGRPPERLEALAEAARALGRPEKRSGESNNHIHTCYSFSPYTPSGA  
ALAARVAGLDVAGSVVDHDSYAAAGEMRAACALLGIGAVTGFELRVSLKAAARQFPEKTAA  
LLTGRKLNNPDSTGIIYMTIQGVPASARMEVETFLAPVRLARFKRTERMVERANSLSSSF  
GLQRIDFEKDVVAASKFAEGGTITERHLLAAVSR SILDSVGGPALPTWLAGTLGLRLSN  
AQRRLSDPANPYLMYDLLGTLKAGFLDKIFIQPEEECV DVRDAISFALRVGAIPAYAYL  
GDVAESPTGDKKAEKFEDEILDDLMPILRDIGFPAITYMPPRNTVAQLLRLQELCGRYGF  
MEISGV DINQPRQSFNCPPELLQPEFRHLDDATWAMVAHEALS AVDRRFGLFSNENPLSHL  
SIRQRIGIFARAGREIDFFDPSSLEKRASTL FQEKNA\*

>SPBDM4\_v1\_50853|ID:27159216| Pyruvate dehydrogenase (Acetyl-transferring) [Uncultured spirochete bdmA 4]  
MPKSLPIEPNEVRKSGTLKIAEIPINQYRRNFEQEKERFGEVGLLAMLMIVVREFETM  
LNTFKTMGAWEGIEYNHKGPAHLSIGQEA AVVGQAALDPDDFIFGSHRSHGEILAKCLS  
AARKLDDAKLVPVMEAWLGGGETFGYAKRMPHSDTFSLARNFIVFGTLAEIFARKAGFNRG  
MGGSMHAFFLPFGSPMNNAI VGGADIALGSALFKRINKKPGIVIANIGDASMGCGPVWE  
AMTMASMDQYRTLWPESAGGAPPILFNFFNNFYGMGGQTNGETMGYGV LARV GAGVNPDA  
MHAERVDGLDPLAVADAVLRKKKILLEGKGPALLDTITYRISGHSPSDSSSYRTKEEIEE  
WQNND SIAEFSK YLMENGILGEAELGTMREGIHRTLFEAVKLATNEDACPRADGRFIESV  
MYSNKKVLKLEDRASEMLQAGDDNPRVQSIARRARFALDADGKPLPKNKVYQLRDGIFEA  
LLYHFKQDPTMAAWGEENRDWGGAF AVYRGLTEALPYPRLFNSSISEGAI VGSVGYALS  
GGRAVVELMYCDFLGRAGDEIFNQASKWQAMSAGLLKMPLVIRV SIGNKYGAQHSQDWSA  
LVAHIPGLKVYFPATPYDAKGMMLHALSGTDPVVFLESQLLYDMGEQFEKDGVPQDY YEI  
PEGVPAVRKAGKDITIATYGATLYRALKAAQILEEKYGVSAEVMDLRFIAPFDYEPLVES  
VRKTGRLVLASDAVERGSFLHTIASNVQGLAFDWDAPVA VVGSRNWITPAAEMESIYFP  
QPEWIIDAIHERILPLRGYTPSTAQTSQEIARRYRAGV\*

>SPBDM4\_v1\_50854|ID:27159217|lpdA| Dihydrolipoyl dehydrogenase [Uncultured spirochete bdmA 4]  
MAHYDVVILGAGPGGYLAAERLAAEKLKVALIEKTDVGGTCLNIGCVPTKTFLNSAKLYA  
HAREGTAFGVETGDVRVNWPRVVAWKDEVVTRLRRLSLELTLKKG GVEIVRGQGKLTGAHS  
VAVENGASEPVLLDADSII VATGSSPIIPPIPGVKGNPAVLDSTGMLSLKDIPQRLCVIG  
GGVIGVEFASLFSSLGSKVTVIEMMDEIVPVM DQMAMMLRNALKQVAFMLGTKVTSVDG  
RNVVYETNGGEKGSLEADAILMSVGRKANIEGWGAQETGLEIKNRAVATDAHQR TNLPGL  
WAIGDVTGKSQLAHAA YRMAEVA VADILAARRGERSVQEFVPETVPWALFSLPEAAGVGY  
TEHEAKAKGYDIDVIRTPYGVSGRFIAENGFSAPGSIKIILEKT SERILGVHMLGAYASE  
HIWGAALALERKLPLSALQNMVFPHTVSEVIREAAWSAR\*

>SPBDM4\_v1\_50855|ID:27159218|pdhC| Pyruvate dehydrogenase E2 component [Uncultured spirochete bdmA 4]  
MATKVIMPKLGNTVESSVILSWKVKPGDHIDKDAVLCEIETDKATMDVPAGVEGTVLALL  
HKEGDDVPVLEAIAVIGNQGETWQEGPETAQNPAVGETQAIPAASEPRESAPTASPPPSN  
AQKTTAAEVSATMSSSMDKHASPRARQAMSQLGVNIGDIARGSGPNRILERDVVAASQQ  
EAI PYASAPQSDKGPQALVEPAQEFEEVPLIGIRKRIAARMLNSIQTTAQYTEHSSADA  
ERLLSLRARKA QKNPDVAGITIGDLVLA AVVKVLPEFPEFNAHLVDGTLKLYKPVHLGV  
AVDTPRGLMVPVVRNAQNLSLTDISKEVKRLAQACQNGTIAPDSLSGSTFTVTNLGAYGI  
DQFTPVINAPETA I LGVCTVRPTLVQTDAGVETRMRIGLSLTSNHQVIDGAYAARFLKRF  
GEVIADIDFLFMSF\*

>SPBDM4\_v1\_50856|ID:27159219| Transcriptional regulator, DeoR family [Uncultured spirochete bdmA 4]  
MLFDLNDREKAILLEADRFSISVSELANALDVSEVTIRGDLSTLEERGYLLRTRGGAEP  
SMHRSILEHQKLHMEEKQRIAKKAAELVGDSDRIMIEAGTTTALISRHLVGKKDVQIVTN  
SMLAFSYSRMNPLINLILTGGTFRRETESLVGPIAVQSLGSFNARLAFVGTDGFSVKRGM  
TTQLTEGAEIVRAMSKRAEITWLIADSSKFDKVG FVSVLPLNAVHGIISDTGLSKEAIEA  
LQAEGLEVLLA\*

>SPBDM4\_v1\_50857|ID:27159220| protein of unknown function [Uncultured spirochete bdmA 4]  
VHFAGTKVELHILKSLNTGKSLTEVS YDNDGFCHASRLAFMYTFTFDVFIFMALFN SVKS  
ENANDYINF\*

>SPBDM4\_v1\_50858|ID:27159221|rbsA| fused D-ribose transporter subunits of ABC superfamily: ATP-binding

components [Uncultured spirochete bdmA 4]

VAEPIIVVRNLSKAFPGVQALQNVQFDLCPGEVHTLVGENGAGKSTLMKILSGVYQRDSG  
EILIDGKPVIEIHNPRAAQKLGISIIHQELNLMNHLTAAQNIYIGREPRYAGGFLLDERTL  
NAKAKELFDMLHMDFDPRRTKVGELTIAKQQMVEIVKALSFNARVLMDEPTSPLNEAEVE  
ELFDIIRHLRSQGVGIIYISHRMDELFRISDRITVLRDGGQYMGTSRVSETNLDQIISLMV  
GRKIDETARRIPKKGKPGEVVLDVRNLNRGRLVKNVGFVTRKGEILGFAGLMGAGRTEVAR  
AVFGADPIDSGEVYIKGKKITIRHPRDAAKHGIGYLSEDRKRYGLAVGMPVLDNICMTDL  
PAFMNAFGVLKPKKMQKTSAEQVKALSIKTPSLLQKVKFSLGGNQKVVVAKWLVKNCDDV  
LFFDEPTRGIDVGAKQEYQLLNELASLGKAVVMISSELPEILRMSDRVVMCEGRITGE  
LDGATATEEAVMKLATQRETMVKTA\*

>SPBDM4\_v1\_50859|ID:27159222|rbsC| D-ribose transporter subunit ; membrane component of ABC superfamily [Uncultured spirochete bdmA 4]

MANKPDDAAAATSLSRKTPETRGISARQKLLAFSSLVLLIVVFSILSPNFFQPYNLIAM  
LATAVNGVLAIGVTFVITGGIDLSVGTMMTFTA VMAAQTVAVWNLPVFGVLMALVAGT  
ICGLASGIMVAKLKIPFIATLGMSMLTKGLSLIARSKPIYFTNAPSFKISMGTMPFP  
IKDFQIPNAVIIILFVLAILASFALNKTIFGRYTFAIGSNEEAARLSGINTDRWKIAVYAV  
NGLICGIAGILIASRLNSAQPALGQGYELDAIAAAVIGGTSLSGGEGTILGTIIGAFIMS  
TLTNGLRILSVPEWQIVTTGIIIFAVYMDILRKKR\*

>SPBDM4\_v1\_50860|ID:27159223| Periplasmic binding protein/LacI transcriptional regulator [Uncultured spirochete bdmA 4]

MKKRTVVLALAFMLIAASSLAAQQYYIPLISKGFQHQFWQAVKQGAMQAAKDFNVNITFE  
GPETEAMVDKQIDMLAAALAKKPNAIGFAALDSKAAIPYLQQAKTAGIPVIAFDSGVDS  
IPLTTCATDNVAAAAYAADKMAELIGGAGEVA VIVHDQTSRTGIDRRDGFVNRIKSKYPK  
ITIVSLQYGGGDQLKSTDLAKAIIQSHPNLKGFFGANEGSAIGVLNGVKEMGKVGKIVVV  
GYDSGAQQIAAVRSGEMAGAITQNPVGIGYKTVEYAIKALKGEKFPKFIDTGFYWDKTN  
IDDPKISAVLYQ\*

>SPBDM4\_v1\_50861|ID:27159224| Fructokinase [Uncultured spirochete bdmA 4]

MIAACGESLIDMVPSEQGRDLFEACPGGCPYTSIAAAAARLTVPTWVFGKTSKDFLGDKIV  
SKLQDSGVDTSLLRNDQAVTLAFVERDAAGNANYAFYSADAADRFLSPSDLPKLPKPEQV  
VFLLVGSISLVQEPSCSTILSRIERHGRKLISFDPNVRPSLIQSKSEYRARFEWICQRS  
AIVKASDSLEWL YECPANEAAANKVLGLGPELVALTMGEHGSFLTRRYRIEFPKQVKV  
VDTIGAGDSFHAGLLAGLGWLKVRDRDSLASENNLRTVLRRLATSAAALDCTKRGAGPP  
TLHELAVFDPEAVRVAPGFIPTFNTKERIC\*

>SPBDM4\_v1\_50862|ID:27159225|fucU| L-fucose mutarotase [Uncultured spirochete bdmA 4]

MLIGIKPCISAELLSVLYRMGHGDEIVLADAFFGGDALNSRVIRADGLRIPDLLDGILRL  
INLDSYVDAPVIMMQPSKGDALDPEVERRYRQVIDRYWPDIPPIARMERFAFYERTKKAF  
AVVMTGETVKYGNILKKGVPVMD\*

>SPBDM4\_v1\_50863|ID:27159226| putative Auxin Efflux Carrier [Uncultured spirochete bdmA 4]

MEQAAGSLLAAILMVAGYVLAKRGWLGRAVEGLKKLITNLTLPLLLFRFLQLRPDGR  
NVLLAAGIFVACAVMGLLGALLSRLAHTPKPETRLLFQGFAGMLGYALYAGYHGSEHLP  
SFAALDMGQVIYVFTVLMVQMSMGTDVHSGENGGKPKFPWRDIANSKVLWAIGGGILLSL  
LAPGFSEVLA VRSNLTRA VFD MVGGLTTPLVCLVIGASLSAGIVVDKYLVRVVAARVVVA  
VGIGTVFAYLIVPALGFSEWHMRAAMMLFILPPPFPVYHKGNAQFVGSVLTSTLVS  
VLI AVLAIAGVA\*

>SPBDM4\_v1\_50864|ID:27159227| Transcriptional regulator, LacI family [Uncultured spirochete bdmA 4]

MAHSTITIRNVAQRANVSTATVSRVLNNDPRVRDATKNVVLEAMESLGYKINFVARSLKT  
SRHTHTIGVLAPDLSGDFMFAESMNRELTLRGYSLVVSTSRDSEEEEEAKRIRHLAERLV  
DGIVLIPIGSSSA YLPQISALNIPIVFDRLKGYETDQVLVDNETGAYEAVRALIREGH  
RRIGFLGGKPEVTTAGERFAGYCRAMEEEGLEIEQQYVRFHGPTLPFGYRTMEEIMKDPH  
SPDTWFIVNLFTHLGATNYLVSEGERARQTTFAAFDEMPYSPLLR YCRYAVQQPIAEMG  
KAAANLIIDRIEGKGPPEPQILRFKTRLIQHTPAR\*

>SPBDM4\_v1\_50865|ID:27159228|fucI| fragment of L-fucose isomerase (part 1) [Uncultured spirochete bdmA 4]

MEQAKDFALQQARNRLKGIAPKIGIRPVIDGRRRGVRESLEDVTMGMAKAAAKLISGNLR  
HPTGEEVECIADSTIGGVAEAAACA EKFAREGVAVTLTVTPCWCYGSETMDTDPLTVKA

VWGFNGTDRPGA VYLA AVLA AHSQMGLPAFGIYGHVQDFKIDNIPADVAEKILRFARA  
GIAAAWMRGKSYLSVGSVAMGIAGSIVNPDDFRE\*

>SPBDM4\_v1\_50866|ID:27159229|fucI| fragment of L-fucose isomerase (part 2) [Uncultured spirochete bdmA 4]  
MRNEYVDMSEITRRIEKEIYSEAEFHRAMEWVKTYCVEGPDNNPPAQQHSRARKDKVWEM  
SAKMAIIVRDLMVGNPDLRRKGLIEESLGHNAIAGFQQQRQWTDHFPNGDFLETILNSS  
FDWTGIRQPYLVATENDSLNGVSMFLGHLLTGSAQIFSDVRTYWSPEAVQRVTGWKPSGL  
SENGFIHLINSGATCLDGTGGERLGGQPAMKPWWHVESGEAKAALKATQWRYASLG YFRG  
GGYSSDFLTEGGMPVTMTRVNFVRGLGPMIQIAEGFTATLPREVHDTL DLRTDPTWPTTW  
FVPRLTGSGPFKDVYSVMANWGANHGAI SYGHIGADLVSLASILRIPVAMHNVSVEKIFR  
PSYWNAFGMDPEGADYRAC SALGPLYK\*

>SPBDM4\_v1\_50867|ID:27159230| putative ABC transporter (Membrane (N-terminal),atp\_bind (C-terminal))  
[Uncultured spirochete bdmA 4]

MAKKSTQNDYLHTIRGYLSRYRKLALPGLGVMILITL GQLAGPYILKQIIDVA VPKEDTG  
LLLKYAFAFLGIVAVTGALS YVGMILLARLGLSIVTLIKQDIFSHLLKLPMSFFDKHPIG  
ELMSRTETDTERVRDMFSNLGANLIVNIFTMIGIFAVTFTL VPKLALIMVGVSAVLLTIL  
IVFFSKIFPMYEKARSFYASITAKVTELIQIEVLKAYGRTGWAEAE LDAPAKQKVSLEV  
RISLIEYSMM SALNSLIGPLFIVALLLLYAPKVL TGTMTLGTILLFVEYGSRLLRPIAEI  
AESLRSLQQARTSLSRIRKIMATPEEPNRGSGKLP TLDHEIRFDHVWFAYEGEEWILRDL  
SFVIPKDSFSAIVGASGSGKSTTISLICGFAHPQKGHV LIDGIPLDEIDIIAWRKHIGLV  
LQESFLFPVSVLENTRLYHEEITSEVRAAISV VHADSAIDTLPEGLSTNL WERGGNLSS  
GERQLVS FARALANPELILLEATSNDMTTEKH IKESMDVLRKGRTMIVVAHRLSSVL  
RADTIFFLSEGRLIAEGTHESLYENLPA YRLLVDQQFPEGKKGHA\*

>SPBDM4\_v1\_50868|ID:27159231| putative ABC transporter, transmembrane region:ABC transporter related  
[Uncultured spirochete bdmA 4]

MNSSRNKNEKKSSARRTGKGAPRRSASPRFSHIRWIREVWRERQGLIWLLLFL TLLSSAV  
AVAFPLLT KQLFDLLEQAIDTKMSEDAAMAQVKRIAL YFVAIGIAGFVAGTFPGIRGALN  
VVFYIVRKR YFGEVVQKDMRFFSKFRSGDVITRL TSDISDFPKLSWFLCSGIFRAVESA  
SKVTFCIAAML SLDWRLALASLASLPIMLFV FTRTQSAIYDRV NKNEQAISAINNQLEMS  
FSGVRVIKAFASEGKYTKFFQDALARRFETEMGV AKLEAVMQLIYQYIDYVAQIALV FVG  
GLMVTKHTISIGTFYAFYNYLNMLIY PMLDIPQLFVFGKRAFVNIDRLEEMRNYQPEMQE  
GERGREGGATKSADQDSAERATREVPLRNGPHDGS AKETLKKAPETTKQLPPLRSLRFEK  
ATVYYEHKHKPAIDDIRLEIFPGEKILVIGPVGSGKT TLVKTALGLLEPRTGRVTINEKS  
VRALDPEERRGLIGYVPQDPLLFSGTIRDNILFGCREGQSLPESELARLIEVSRLSDEIA  
AFPDGLET KLGQRGTSVSGGQKQRIAIARALAGYP ALLLLDDMTASLDTNNEEALWRSLA  
EMPEFARAAVIAVSHRLSSIQYVDRVLFLKN GRITGFGEHSELMANNPAYREFVAEHVQR  
PGE\*

>SPBDM4\_v1\_50869|ID:27159232| conserved protein of unknown function [Uncultured spirochete bdmA 4]

MQEKSSGQFYAPKGAAPVCAQGE CNIGVIGLDHGHYIGMCNGLTEAGAAIAMVYDRDAA  
NVARFREVYPDATPASSIDEILRASDIKLVASAIIPA ERGPLGMRALEAGKHFFSDKPPF  
TTRTQVDLARRTVAETGKMYAVYYSERLHVEASVYA QRLIEDGAIGKIVHISGWGPHRIS  
LDQRPEWFFDKANFGGILVDLGCHQIEQILFYAGARDASISASHTANYKFSRYRQFEDFG  
DASLVMDNGATGYFSVNWLTPDGLGAWGDGR TFIQGTGDIEMRKYIDVASDPEGDHVYL  
VNHRGEYHFRAAGTCGFPPFGQLVRDCIDNTRTAQDQELTFRAT ELAIEAEEKA EKLRAK  
I\*

>SPBDM4\_v1\_50870|ID:27159233| conserved membrane protein of unknown function [Uncultured spirochete bdmA 4]

MKPNQSTLKVLSIASALAF LAVLVNNALANALPLNGVTTGQLSDEIPNLFVPAGLTF SIW  
GVYLLLAGYVLYAIREAWRKN GDGGGTARD AVLFLLNAAANIGWIFAWQWRHVALSMA  
LMLVILGTLIALELSIEQKMKKGGALS LAEPLSPGEP SAQPRPQRSSRARHLRRFFLSVP  
IRVYLGWISVATIANATALLVKLGWNGWGLDPRAWTVIVIAAGLA VALGFSVGQRQIAAP  
LVVVWAYAGIVIKRTQVDAAYSRA VWIAALVSAVILL SFVVVRIVRPGTAGSGKAAAGQ  
S\*

>SPBDM4\_v1\_50871|ID:27159234| protein of unknown function [Uncultured spirochete bdmA 4]  
MLDSRDTMKGMEEDKTM SKKSILVMVFLCSLLLGAGA QVIVFGMGDPDIDAGLNELNASA

KLNMPGFQAEVALAWGQPAASITVALSQGLSPGEVYLAALAHFSGKPLNVVIELYKKDK  
AKGWGALAKELGIKPGSKEFKLLKETLEGSRKKVKGKK\*

>SPBDM4\_v1\_50872|ID:27159235| exported protein of unknown function [Uncultured spirochete bdmA 4]  
MKKTKYPIILAGLIVFLWSCQTSDEELSSSEEFVAEQTAASISTDEGGALYTTKAL  
SDPSYYENLEDEAEYDATTGTFSVTTSIDLTYKGSTSVNMSYKLYDTDGNVQSSFDSATT  
YRVEATMQFSDVNTNRYEAHTSKSTNVTVTGLNTDTVVVNGEWLAERTAQTSSSVPPQH  
ETTLSHLLLRNITYTKESETGQYLLSGGSASSQIEGSINNKSFTRSVQWTFGDSNTATM  
TYQGETMTVNITTVIVD\*

>SPBDM4\_v1\_50873|ID:27159236|ompR| Transcriptional regulatory protein OmpR [Uncultured spirochete bdmA 4]  
MEKVIVDDDEKMSALLVRYLGEFGFEVVSMSRPSEALALLGQSRFDIAILDVMLPEMDG  
FELLKKIREIDDLPIIMLTARGELHDRVLGLELGSDDYIQKPFEPRELVARIRAILRRRK  
ANGDVVSDSSVIKAVAGIVLNRATFSVTVDGVPIELTTFEFQLLDIFLSSPRIVFPREVLM  
DKLRGSSIGAFDRSIDVLSRLRTQLQDDSRNPRFIKTIHGIGYVFMAE\*

>SPBDM4\_v1\_50874|ID:27159237| exported protein of unknown function [Uncultured spirochete bdmA 4]  
MRWRKSLFTKTYVTIVILALISALAVGLFVFGQYRLRFKSNSVSALPQFYKRNSMDLGIS  
PDPEKGRILAERLGVDFIFYFGKSSH\*

>SPBDM4\_v1\_50875|ID:27159238| putative Histidine kinase [Uncultured spirochete bdmA 4]  
MENISKRGRDIQGYRDRKLYVGFSDERGYFVFGYGNPLFNIERLPVVLGTFLIGSLPLII  
TFFVIRMLLLPLKRLEQGVSELNAGNLSFRVSPVRDDELGALAKAFNHMAEQIQQMISDK  
EQLILDVSHELKTPITRIKLSLEFLENEALRKSLEEDVDEMCLKVQELLSARLNTPYGS  
PKREKTELAFLWIIQYQYKDPGAVLLPGDPAVFVEVDQGLFQTACKNVLENAIRYSR  
PNAPPVELWYEVGASFVEISFRDHGVGIASEHLDRVFEPFYRVDRSRDRRAGGYGLGFYL  
VKKIVTAHDGTVLIESEVGGKGLVTIRIPRNNSSN\*

>SPBDM4\_v1\_50876|ID:27159239|ygeW| conserved hypothetical protein [Uncultured spirochete bdmA 4]  
MNEIRSLIEQLRVKRIDMAGKDFLLTWEKTQDEIEATFLVADILRAMRERDISPRVDFDSG  
IAVSNFRDNSTRTRFSFASACDLLGLYIQDLDEGKSQIAHGETVRETANMISFLTEAIGI  
RDDMYLGEEDRYQREVKGALDDGVKAGVLPSPRAIVNLQNDIDHPTQSMADFLHLAHYFG  
GLDKLRGKKIAMSWAYSYSYGKPLSVPQGVIGLASRFGMDIVLAHPQGYDLIPDVLEMTK  
KQASASGGSFTYTDSDMDEAFKDADIVPKSWAPYDVMLRRVPLLHAGDKDGLKALEKEAL  
ANNSKFVDWECTEEKMGLTKNGKALYMHCLPADITDVSCEAGEVAASVFDYRDDTYREA  
SYKPYIIAAMILGKFANPAALLESLLDRGKQRIFGA\*

>SPBDM4\_v1\_50877|ID:27159240| 8-oxoguanine deaminase [Uncultured spirochete bdmA 4]  
VILLKDCFAVAVPAATRGTETGADGAAGATQTAKAVRSARRRFDLLRDVDILVDGNRIEK  
IAPTIEAPEGATVIDASRHVVLPGLVNTHHHFYQTLTRNLPAVQDAKLFDWLVYLYEIKW  
YLDPEAVYWSSTLAMAELAKTGCTLTTDHHYL YPTGFGGDIPSLQFRAAADIGLRFAPTR  
GMSRSKKGGLPPDSTVQDEDSILAHSEETLRRFHDPAPDAMRKVALAPCSPFSVSERL  
MKDSALARRYGARIHHLAETSDEDDYCVQVYGRRPLEVMRDCDFVGPDVWYAHGIFFN  
DEELDFLAKTGTGVAHCPSSNMRLGSGICRVHEMLGRGVPVGLGVDGSASNDTSDMLGEA  
RQALLQRIKYGSAGLTAGEAMHIATAGGARILGFEEAGEIAEGLADIALFDVMKLEYA  
GALSPLAALLFSGYNHGVDYLIVNGKQVVRHGLLVGADEETIRRNALSACERMYKKAGI  
L\*

>SPBDM4\_v1\_50878|ID:27159241| Pyridoxal-5'-phosphate-dependent protein beta subunit [Uncultured spirochete bdmA 4]  
MIDLNIHDAQRKKNIERCKQKGILLPTFAQMRDPSRIPSSVKNELSNIGLWDVHPRNLF  
VTWHNEPKEFGGGYGSVNYIEIPRAITGTKARIVGLAGKWFPTGAHKVGAAYACLAPELV  
TGRFDPTTKKAVWPSTGN YCRGGAYISRLSCPSVAILPAEMSRERFEWLKTMAEEVIAT  
PGCESNVKEIFDKCVELQKTRSDVVIFNQFDQLPNHLWHYAITGPAMEEVFRAVGGPNSH  
VGGIVLSSGSAGTLGSGSYIKEKFPKALAVGEALQCPTILENGFGGHRIEGIGDKHIPW  
IHNFRD TDAAVGVDELPMRFIRLFNEPAGRKALIDAGADPAVVEKLEWLGISGVGNLIA  
AIKFAKYELGEDDIVFTMFTDSMAMYQSRLAELTAERGA YDQRQADRDLDRLAGLSVDH  
VFEMTHVDKRRAHNLKYTWIEQM GKDLSELRDQWDNYR TYWGGLHGQIGALDELIEDFN  
AEVLR\*

>SPBDM4\_v1\_50879|ID:27159242| PIN domain protein [Uncultured spirochete bdmA 4]  
MNIVDSSCWLEFFAGSRVGDEVAPIIEDTENLLVPSITIYEVFKLLELLEDEDKALFAIA

HMKQGNVINLDTDVAIYAAKTGKENKLPADSIIYAINQKYDAMLWTQDKHFKDLKSVHC  
FEKA\*

>SPBDM4\_v1\_50880|ID:27159243| Transcriptional regulator, AbrB family [Uncultured spirochete bdmA 4]  
MKTVTVSSKYQFVIPKEIRNTIGLHVGAKEVLTYSRIELVPIHPMKTLLKGAQFQGINTK  
IEREEDRV\*

>SPBDM4\_v1\_50881|ID:27159244| putative threonine synthase [Uncultured spirochete bdmA 4]  
METRWMYRCPTCGKTYPIEPGRYLCDECAKKQRPDEPLRGVLECAWEGEAPARGSVPLPV  
EDRFFPPIVPGQTPLWAPERLRSELGMPNLWLKDDTCNPSGSYKDRASWLVAAFARKFGI  
REIVLASTGNAASSMACVGAADIKIRVYVPKSAPIAKRVQILQYGAELVEVDGTYDLAF  
DQSLAYS RATGMLSRNTAYNPLTIEGKKTASFEIARDLATAKKAAGADVRAMSAAPAYLA  
PDHVFVPTGDGVIIAGVIRGFEDLVKLGWIERMPTVWAAQAEGSCAIARALETGIFEP RP  
SSTIADSISVDIPRNGYFALDRLRRHSGRAVVVSDGEILAAQRRLSRSSGLFAEPSSACA  
FAGFLKVKEQLAPGTRVVVMLTGSGLKDIKSAAKAVGLTI\*

>SPBDM4\_v1\_50882|ID:27159245| ygeY| putative peptidase [Uncultured spirochete bdmA 4]  
MNSKKILEKAREYRDYSAQNLSKIIQVPAFSTTEKDRIVLLKQLCEEAGMEDLWIDGLGS  
LLGRVSGSRKIVFDAHIDTVGVGDESQWKTPPFSGLIQDGLVHGRGASDQLGGAASMIT  
AARILKDLAYKGD FEVWFSFTTIEEDCDGMCWKYLIEEEKFVPDFAVSTEPTSCRLYRGH  
RGRMEIQIDIKGVSCHGSAPERGDSAA YKAARAALAEKLNERLHPDDDNFLGKGTITVS  
QINVHGPSQCAVPDQAMLYCDRRLTWGETDELAIAQVKDALKEAGVNNFTVFMPEYR RSA  
WTGTEYHQELYFPTWKIPADHVLVRSGVDAYSELFTKPPVVDKWTFTSTNGVAICGRHKIP  
VIGFGPGDEAQAHAPEITRIDDLIASAFYAALPYVLGAKAK\*

>SPBDM4\_v1\_50883|ID:27159246| ssnA| putative chlorohydrolase/aminohydrolase [Uncultured spirochete bdmA 4]  
MILFRNVKIMELEPPAVSEPTDVA VFEHEEGDRGGTVAAIGQKLQTQYSKAKVAGEGGYL  
SAGLVCGH THLYSALARGMLVDIAPSKDFAQMLNHLWWRLDRAIDPAILRASALAGCSDA  
LKAGVTSLV DHHAGPECIDGSLSVIRDAYEAVGVRGILCYETTDNRNGMDGARAGVAENVR  
FAKEIDELRASGEKPLTEAAIGAHASFTVSDETLGALAEAVHTTGRGLHIHLAEDKFD AV  
DARHRFGKDPVERIEAAGALNDHSIIHGHLWLSPEVELMNARGAFLAHNARSNMNNAVG  
YNNLLPTFANVVLGTDGMGADM LEEFKFAAFRHRESQGPWWPGDFLKVLYRGNALIGRYF  
DRDYAPGYPGFGTVKVGAPADLVLWDYDPPTPLTGDNIAGHFAFGMSSRSVRTVMVAGAL  
RILDRRPLYDDSGIQTEAREQASRLWKRMEER\*

>SPBDM4\_v1\_50884|ID:27159247| conserved protein of unknown function [Uncultured spirochete bdmA 4]  
MSKVMKTTSLVLLERITGEYLAKGTIFEIPKATWLDVFEQSESTGLGIMSANVSIPLG  
PAAGPHTQIAPNLVA AFLSGARV FELKTVQENDHLDIDKPCIDALDEGHNVEWSTELTLE  
QARMEYLNAWIAINLLARMWSHKPSDFIFNMSVGYTLDGKSEKMDAFIEGMRRPEAGDY  
WENAIEELQEFIESPKFIETFGQAALERARSIAEHMPVRPVH SVTLSTMHGCPPDEIERI  
GRYLIEEKGFDTYIKLNPTLIGYEAAREILDRLGWTDIILRRRESFEHDLQFDMALGLIQK  
LTEAAVSRGRRFGIKLSNTLANVNDGCCLPGGERYMSGRALFPITVHLAAKLARAIPDFP  
ARFSYCGGVSAFNAADLIKAGLPLTIATDILKPGGYQRM AHMVKDVLAAALQYAPAKPDA  
EALDALAESVFARPYRKEWKEGTASIGRPLPLFDCFAAPCVEACPVKQKVSAYIAATGA  
GNADKGLSIILSDNPLPTITGVLCDHVCQEHCSRVDYEGAVRIRDVKLAAVRTAGTGLAA  
EVQAAWPRESRGRTA VVGAGPAGLACAWHLAQYGQKV VVFEKSPVPGGVPSNIIPSFRIA  
REDIAADIARLEKSGVEFRFGAE AASP KRLKDEGFDNIVIAHGAHGARELELKG GGVSVV  
HALEFLSVC MKVGP SHFE GSRHILVVG GNTACDAVRMATRIPGVKSFRWSYRRTRREMP  
ADIEELTNAVREATERNTGDPIGAPLKDTTKESPILGAGSLFDPAGPVLLELTLPETIEP  
GKAILRRMKLGEK DASGRRSPLPTEDTLELSCDLIITAVGEKPDAA LLEDFGVEVGKSGL  
PVVDGETMESA VPGVYVCGDARRGPSSIIASEADGR TAAHSILRKQGI EPAEVDYRAPAP  
SSAARASRGKIFPLSPEDPEFAKRESERCLSCDTACLRCVEVCPN RANMVIETDRAFDQ  
PEQILHVDRLCNECGNCGLFCPWE GEPYTGKPTLFDSQKDMVASNNA GFTFIGNRERPRL  
LLRTEKSGEIVELPYFAWDGTISLPDHRQMVTLARTVWNEHRYLVEVHE\*

>SPBDM4\_v1\_50885|ID:27159248| putative Allantoinase [Uncultured spirochete bdmA 4]  
MIITNVAALPGERDFRLVDIFIKEGKITAIKEAGTLKGAGGNVDPARSADEEILDAKG  
LLAFPGAIDPHVHFDEPGFTHREDFMHGSAEAARGGVTTVIDMPCTSIPPVTAPHALEEK  
LSIVREKALVDFAFYGGINGHMKPEDIPQVVESLAPNVVGFKSYFISGMDTFPAVDEAQF  
AAAQAQACAKGGRPLLLHAEDPDVIAEATRERAFIRGTQKHQWIDYYASRPMDAEVA AVLK

ALKLAGQYAKNIHIVHVGTAKAAIAVSERGATCETCAHYLAFDETDFARLGAALKTAPPV  
KAPEQKAMLWHLADGQIGFVTSDHAGAPEYEKYTDDPLTAYGGIPGTGTLFPYLLSEGL  
FAKRLPLERFLEATSGGAARRYGLWQAKGSLLPKGDADFVLVDPDHTSRVIPSNMMSKSA  
ITPFAGMLLSGRIEGTFVRGSCVYASVRLAAALGKKSdTIVNEAGMILARPGFGKFLTWG  
YR\*

>SPBDM4\_v1\_50886|ID:27159249|xdhA [H] Xanthine dehydrogenase, molybdenum binding subunit [Uncultured spirochete bdmA 4]

MKTEDTRNMNKTRIEEASPVHAMRAAASVDPSVIVPESLPNVLGQTQYIDDLPRSSGCLQ  
AVVRLSDSAHARILAIRTEEALALDPSVRVILAKDVPGTNQIGFNKPDEPLLPEEWEYW  
GQPIAIVLASTRSLARKAANLLRIESEPLPVITDPREAAARGDFIFPPRTIACGDTGEAF  
SQCAYVVEGKVDSSGGQEHVYLETQGAIAQVTDGRRMHVISGTQGPSGVQKAVAQVLGLPM  
NLVEVEARRLGGAFGGKEDQAANWACMAAVASWVTGKPVLYLNRKDDMRATGKRHPYSS  
DFRIGADKNGKLLAFEADYYQNSGSSCDLSPAILARTVLHATGAYNIPNVRVTGYMCRNT  
LPSFTAFRGFGAPQAFFVIESAMDALAQKMGVDPVELKRRNLYREGDQTYYGMTLERVRA  
SDAVERLLDKVDYPSLKARIAQFNATHRFEKKGVLIPVSFGISFTKLQMNQAGALVHVY  
TDGSVVVSTGAIEMGQQVARKISLVVARALGVPVAKVSIQRTTTLTVANTVPTAASTGSD  
LNGMAAKIACQEIRGRLVKKAAELLNAAPGEIDIREGRVFLNGTQSELTWQALIEAVHAA  
RQDLSAHGFYATPFLEYDMRTERGRPFAYHVYGAALVEATVDTLRATYSLDSVSIVHDIG  
ESIDLSTDRGQVEGALAQGLGWALLEDLRFADGRPLSDTLSTYKVPDVTMPPSIDIEF  
MPPIENLSTPYNSKAVGEPPLQYGIAGYFAVLNAVRAALDRPLSSYNIPLIPERSDILLS  
SKSEAEGTEL\*

>SPBDM4\_v1\_50887|ID:27159250| xanthine dehydrogenase, Fe-S binding subunit (modular protein) [Uncultured spirochete bdmA 4]

MASLHVKINNIWQDLRSSEGMPALDVVRGELGLTSTKEGCREGDCGACAVLVGEQVGMV  
RYRAVPSCLLALGELRGKHLVTLEGLVEGAKDGLTPVMRAFLDENASQCGFCTPGFIAL  
TSWLAEPQVPDLAALRAIDGNLCRCTGYGAIRRAAARLVERFKDLPLESGARLKTLEA  
QVLPPSVLEFMAESAGKPEADSRSRKISGNAPARGGNADNAVAVVGGGTDYYVRNPDP  
EEGFSPFLTRMLPEFGQIRYVSDREDRWLEVGAAVTVRDFSSHVVRHEVPGIERFETMF  
ASTLIRNLATVGGNIVNASPVADITSMALLALGARLVIVPEADAGNKNTPLRLCPLEQFFL  
GYKKNLGPGEVLKAVWIPVLADPSSRKFSFEKASKRRNLDIAAVNMAISFRIDKGRFRD  
VRISLGGVAPVPLLGIGAQEVLEGAPCDVSDKKS LAGLAKNAARRAESAIISPISDVRGSS  
DYRRRMVHQLMLAHFIRLFETSGVAEELFP\*

>SPBDM4\_v1\_50888|ID:27159251|ade| Adenine deaminase [Uncultured spirochete bdmA 4]

MNREIIDAATGKTQCDVNYTDCTVVDVLSGRFLPNSTVSVKGGYVAGINDGLTANETVDL  
EGMFLAPGLIDAHVHIESSLTPAEYARVVVPRGTTTTVADPHEIANVMGYDGMRYMLNV  
SQNMPLDVYFMVPCVPATDFDTAGAALYASDMHQFLQEPRVLGLGEVMNYPEVLAQNPQ  
LMDKIALFKSNGRPIDGHSPGLRGANLSAYVAAGIGSDHECTTPEEALKEKVGKGMYIMLR  
EGSTAKDLRVLLPALRRENAARFMLCSDDRHCNDLRDEGHMDFSLRLMLDAGIDPIDAIR  
VASSNAARWFGIPGQGA VAPGYKADFIAPSPFEYFETKVVVKNGGIVARNGALVQDFATA  
PTTIRDSVNIKWLTKEDFAIPDKGKAVR VIEVHRESLLTGHGIARIPAEDGLLVPDLEHD  
ILKIFVIERHTGSGNIGKGFIRGLGLTRGAIGSTISHDSHNMIAGVDDVSIFKAARHLN  
KIRGGLVYAVGDKILLDLPLPVAGLMSDKSADFVIDRLSAFEKLFQEAGLMATSPLMTLS  
FMALPVIPSLKITDRGLVDVDRFEKISLYVD\*

>SPBDM4\_v1\_50889|ID:27159252|tsgC| putative glucose ABC transporter permease protein TsgC13 [Uncultured spirochete bdmA 4]

MDFLTSLVLTITIRAGTSLTIATIGEILTERSGILNLGVEGIMLMGALSATVVFYTHSIA  
LGFLVAIGIGLLALLHAFLTTMTRANQVVSGLSITLFGTGFSSFLGQRLGPASNNFRLV  
GLRAERIAPLAPDWA EKIPILGAFLNQDIMTYAVYLLIPIAWFFLYKTRPGLWLRVGED  
PQTADAMGIDVIKTRYFYTIIGGMLIALGGAHLSLSYTPGWSENITGGRGWIVIALVIFS  
MWNPARAVWGALLFGGINAVQFRLQASGTSIPASFLNMLPYAGTIIVLVVMTWWEALSKR  
VGAPAALGTSYMREDK\*

>SPBDM4\_v1\_50890|ID:27159253| Inner-membrane translocator [Uncultured spirochete bdmA 4]

MKLLFEKRKASSVPALILVPFVSFLVSLVLTALLEIFGANPFKTFAMA AVGAFGSSHGFL  
AETLVKAIPLMMTGLGVAIAFRLRFWNIGAEGQLTMGGVAAAGVALFMERFFPGRSLLVG

ALLGGLLAGALWAGVPALLKTSCLKVDETLVTLMMNYAILYSEFLYGPWRDPKGYGFPG  
SRMFSADAWLPRIVGRAHIGIWIIVALAILWIVLKRTRWGFELQVIGASQRAARYQGIA  
VERNIVLAVMLSGALCGLAGAFEVTGISHRLQQGLSIGYGYTAIIVAWMSQLNPLAVPFV  
AIALAALAVGGDQVQMVMGLPAAMGVVMQGLILFPMLAGSLFTEYRLSVVRPESKASCPD  
PVEE\*

>SPBDM4\_v1\_50891|ID:27159254|yufO| Uncharacterized ABC transporter ATP-binding protein YufO [Uncultured spirochete bdmA 4]

MNDTVVPKVEMRNISKSPFVGLANDCVDLKLHKGEVLALLGENGAGKSTLMNVLCGLYRP  
DRGEIYIDGKYAEIHSRDAQKYGIGMVHQNFKLVDSMNVLENILGLRDEPFVVDLKR  
RSRLVDLASQYHLDVDPSASIWQLSVGEQQRVEILKLLYRNAEILILDEPTAVLTPQESH  
ELNRVVHVMKQEGKSAIFITHKMEEVMEFSDHVMVLRKGVVDETSTAETTPKELARMMV  
GREVLFQIEKKPMAPGKVALELSHIEALGDRGLPALKDISFRLHAGEILGIAGVAGNGQR  
ELAENVVTGLRRSSKGLQIDGKDMTNKSPLEIIRRGVAHIPQDRVSVGAAGDLSVASNLA  
MKQYRSRPLAAGIFLLQNKILDFARTLIEKFRISTPSPKTQVKFLSSGGNIQKILAREIG  
AARTLMIAVYPSRGLDVGATETVRRQLVSQRDAGLGVLFSEDLDELLQISDRVAVLFEG  
KMMGVFDTNTVNDHIGMLMAGMDREAGA\*

>SPBDM4\_v1\_50892|ID:27159255| Purine-binding protein BAB2\_0673 [Uncultured spirochete bdmA 4]

MRKIILGLVTMLMLVSLVLPATAQAKKPLKVAFVYIGPPGDLGWTYEHERGRLALQKYFG  
DKIDTKYVENVPEGPDAERIIRQYAIQGFVIFTTSFGYMDPTYAVAQEFPKIIFEHCSG  
YKTAPNMATYFGRIIEARYLTGIIAGRTTKSNKIGYVAAFGEIPEVVRGINGFTLGVRVSVN  
PNAKVQVWWTNTWYDPVKEREAVALLDAGCDIIAQHQDTTEPQKAAQERGKLSVGYDSD  
MGKVFVGDVTLASAVWNWETYYIATIQNVLNGTWKTHEFWGGLKDNIAKLSELSRPVPSV  
KKEVEDTQKKIMSGWSIFTGPIKDQSGKVYKAGEVIPDDKQLSMDWVFEVGVGKQV\*

>SPBDM4\_v1\_50893|ID:27159256| protein of unknown function [Uncultured spirochete bdmA 4]

LRPPISFIAIIVIPRETNSLRSLSAVPFSEKLPTWIQYSEAEELGGEGGFDGLGAVL  
EGVVVVEPAGLVVVVFAGADEGEGTGTGVDGFSVVA\*

>SPBDM4\_v1\_50894|ID:27159257|coaE| Dephospho-CoA kinase [Uncultured spirochete bdmA 4]

MQIIGLTGGYCAGKNEVARILEKYGWEVVDVDKLGHAALLQVSDQLIKIFGESIKKEDGT  
IDRKRLGTIVFSDKNRLDALEATVHPAILSLLNEEIEKAKHNTVEKFCINAALLYRFPQT  
HLCNAVIEVRAPLYQRILRAQRDRHLSINAALERIKSQKYLWDMRPKEGVPIYMLWNSGS  
SAELKISTEALLNKIAASGGK\*

>SPBDM4\_v1\_50895|ID:27159258|polA| DNA polymerase I [Uncultured spirochete bdmA 4]

MENKEPLYILDVYAFIYRSYFAFIRKPLRNSRGENVSAVFGFFRFLFSLVQQKNPTLFAA  
ALDSVGPTRHDQFVAYKATRQKTPEDLTAQIPKIESILQALGVPTLRCEGYEADDIIAT  
LARQCAKEERPCFIVSGDKDLLQLVGNKTMALRPSNFSEFRETDAAGVMGEWGVVRPEQIG  
DYLALTGDAASNIPGVKIGDKTAQKLISQFGLDAVYGNLQNIPEPSLRKKLEEGRESA  
SISKKLVSICYDVPNCPGNISLRLSLNAAAAPLFLNEDIKSLVPEALRKQKTFQTSAS  
PVMDDQKSSTLEKSPASDASEPEIAQTEKKSAMYESILDGKKLDEIIDAAILKGVCAFDT  
ETDSDLVHHAGIVGFSISFEPKSSWYVPLISPDAECIPKQALSSLSRLLHAEHMILLVGH  
NLKFDINVLAAAGMDVSVPCFDTMIAAWVLDAEAPSFSLSSVAARFLDLHGIEYEEVVPK  
GQTFADVPLERATQYAAEDADFSFQLYLALSKEIESAGLHNVFFDIEMPLLPIAEMERS  
GIRVDAGRLRSYGRELEGEASIEAKVYQLVGHDFNLASPKQLAEVLFSEKLPVQKRTK  
TGFSTDTSVLEELASLDPVPLILRHRLTKLKNTYIEPLADLAEARGRVHTTFVQTGAA  
TGRLSSRDPNLQNIPIREEEGRKIRAAFVAEPGHSLSADYSQIELVVMHLSKDSNLMK  
AFREGVDIHKRTASLIFGISEDQVDADRRRIAKTINFGVIYGM SAFRLARDLGISNTLAR  
NFIDSYFSTYAGVAEFIKKTVGHAQESGISSTLFGRRRILGIDSRNKTEQQAQRVAVN  
TPIQGTAAADIVKIAMIKVHRSLREKLPEVKMLLQVHDELIFEAPQASVSKAMDLIKDEME  
HAVRLDVPLRVSVESATSWGDMHL\*

>SPBDM4\_v1\_50896|ID:27159259| putative Heat shock protein DnaJ domain protein [Uncultured spirochete bdmA 4]

MVDQIFDRLEMLVRAWMSSAFGEGLGHTNYQDARAFEDQDMADAWDELESYLDPSKTESE  
RKAGSQRRASSHRHSYGTQNYDEDIERRAVEDAYRFLGLEPYTSFSRVKIRYKELLKHH  
PDRHTDSPENMQKATVVS AKINTAYQLIETWEESRMEHPNGK\*

>SPBDM4\_v1\_50897|ID:27159260| putative Kinase, PfkB family [Uncultured spirochete bdmA 4]

MLQIDKRIKPYCVVVGGINIDIQAFCHSEYIERDSNPGYIKRSLGGVGRNIAENLVRLGL

QTEMITILGDS PGWKKLISHTEHAGIGLGHSPCLPTVPLPTYLCILERDGGGLVGAVADMR  
AIEQMIDHLEKQKPLLDEAAAIIVDGNIPQTCIEWLAERYNANGDRASFNVNTAHKNRD  
ATKPLLVADPVSSSKAERFKSCFGKFDIAKPNIAEAAVIAGVETKDSLQNIISAMRKASN  
LPGELYVSMGEKGMIEVIEHNSMTNISLPPFKLRPHSINHSGAGDAACAALVWISIYERII  
ARELKRKPGNLC PQDKAKMALASALYAASSKYSVNP KLN DYRLCETAANCYP ELSEIIDD  
IRHGEM\*

>SPBDM4\_v1\_50898|ID:27159261|yeiN| conserved hypothetical protein [Uncultured spirochete bdmA 4]  
VNHYLDISEEVADALRINMPIVALESTIITHGMPWPQNLETALEVENAVREEGSVPATIA  
IIDGRLKVGLSHDELMRLADGSLHPVKASRRDIPILIARHGNGATTVSGTMLIAERAGIR  
LFATGGIGGVHRGAEKTDVVSADLEELAHSSVAVVCAGAKAILDLPKTMEYLETKGVPVI  
GFGTSELPAFYTRQSGIDLSQHADTPGEIAQLIYVKWALGLSGGVVIANPIPVQYAMNKS  
IIDA AIGKAIEESEMKGLKGAELTPYLLARVAEVTGGDSLEANIALVQNNAHVAALIAKE  
YERIGLEAEA\*

>SPBDM4\_v1\_50899|ID:27159262| conserved protein of unknown function [Uncultured spirochete bdmA 4]  
MRIIRCEYEGKLFYGRIDGDNVMLSVDVPKIRMSHGGKEVYWESEEKSVPFKVRLEAPC  
APKKA VCVGLNYRDHADEFQGTIPSAPVLFIKPSTSLGPGKTIQYPSMSKRVDYEAELV  
VIIGRLAKNVT AHD AFDYVLGYTCGNDVTARDLQPQNGQWTIAKSFDTFMPLGPWIETDI  
DPSSLQIKALLNGEV RQSSSTTNLIFNVADLIA YISQIMTLEPGDVIMTGTPSGVGPMKK  
GDRIVVEIEGIGHLENIIG\*

>SPBDM4\_v1\_50900|ID:27159263| putative Malate permease [Uncultured spirochete bdmA 4]  
MTLSRIVSIFLLLVGYIARKRKVLDADSRISISDFVLSIALPFTIISSFDRSIPLTAAK  
DLLKVALYAIGIHLIAILVAKISFSHVADSKRKILTYITVFSNCGFMGFPVAESVFGRIG  
LMYASVYVMIFNIFVWTYGVALLSGDGGGKGLFRVKDIIFNPGNVAVILGCVIWLLPFS  
LPETINYAILLIGNCTTPLSMIVV GATLAGISIKGLFSRTEVWIGSLMRL LIMP MIIFFI  
MRIFKENDASARVANFLVAMPAAAQT VIFAERYDADVSLASGIVFISTVFSAITIPLAAK  
IISA\*

>SPBDM4\_v1\_50901|ID:27159264| protein of unknown function [Uncultured spirochete bdmA 4]  
MRRAKIAITVCEPVL YTEFYPIFEEAPFLIIVDEYNRIQKYS AEITAKGITRGRTEWII  
RGAKILVTGSIDNDSYQKLKQAGIPVKWETFGDVKSLVERARRFAGYLIEMLGKERVVRT  
RFDRLRPKNIAAPYVIPYMGDDPEFLKDLERKEKREGKRLLRPKNDEEANEDDYDTEG  
DSFSGEDDDD\*

>SPBDM4\_v1\_50902|ID:27159265|parC| DNA topoisomerase 4 subunit A [Uncultured spirochete bdmA 4]  
VAYIKKLLNDNFLYYASYVIMDRAIPELDDGLKPVQRRILHTLFEMDDGKFKVANVVGH  
CMKYHPHG DASIGSALVGLANKGLFIETQGNFGNPVTGDEASAPRYIECRCTTFAKEVFF  
HPKITQYIDSYDGRNREPLVFPKIPVVLMLGTGEGIAVGMSTKILPHNSVEVIQAEVAF  
EGKSFALTPDFPTGGFIDASDYADGNGKVRVRALLDTS DPKKI VIKEVPY GSTTESLIGS  
IEEGVRAGHLKIASISDFTTDKVEIELKLARGVYAKEVVDSLYAFTECERSISCNCLVIK  
DDKPTISTVSDIIRYHAGKLLNLLRQELELERDELQAE LFARTLERIFIEERIYKEIETK  
RTSDAVIKAVLDGFRPF AKELSRKIGTEDVERLLKIPIRRISLYDIEKAKKDMERIQQL  
AQNKEHLNHLVQY AIEILKTYIKTIESASSRRTRIKSFKKIEVKTVARHDFALRYDSEGG  
YLGTEVS GEKILEASKFDKILILRKNGIYTVIPLPKFFAGQNALWITVAEKEALSSAII  
TLVYSLANQKGVYIKRTTIDSWLTGKDYSLVPEKAEILGFSIDTAYEFQLEYKPKPRSKK  
TKQIFHAKEYPVRKRQAQGIRLADREVIQLEVLHAQKANIINSPSAHGGGLLEAALKKHK  
K\*

>SPBDM4\_v1\_50903|ID:27159266|parE| DNA topoisomerase 4 subunit B [Uncultured spirochete bdmA 4]  
VGTKSIYDESKIKT LSSLEHIRLRTGMYIGRLGDGSSPDDGIYVLLKEVIDNSVDEFIMG  
AGNQIAITIDGKKVRVRDYGRGIPLGKVICVSVINTGAKYDDEVFQFSVGLNGVGT KAV  
NALSKDFRVASYREGKVFEAKFSRGILTDSREGNNHEKTGTLVEFIPDEEIFGEYSFIPE  
FIEKRLWNYACLNPGLTTLNGKDFHAEKGLHDLLSTELGGSALYDIGWYRGDRIEFAFT  
HTKEYGEEHFSFVNGQYTS DGGSHLSAFREGFLKAIN EFFQASYRGEDVREGLAACIAIR  
IKNPVFESQTKNKLGN SDIRPWILQEVKKGVDEILRRNPQAAKTLQEKILTNEKLRTELN  
IVRKEAKEAAKRIELKIPNLRDCKAHLGDGDLGDRSTIFITEGLSAAGSMVSARDVHTQA  
IFSLRGKPENMFDPRPSAIYKNEELYNLMMALGIENNVENLRFARIVIATDADYDGFHIR  
NLLITFFLTYFEELVVQSRVYLLETPLFRVRTKKTLYCYSVRERDEAIQRLGQGTEVTR



FKGLGEISPAEFGQFIGKDIRL VKVDIQLTSSVPELLCFYMGKNSPERRQFIMDNLVTEL

\*

>SPBDM4\_v1\_50904|ID:27159267| Ribulose-5-phosphate 4-epimerase-like epimerase or aldolase [Uncultured spirochete bdmA 4]

MSYLIKDEFKRAVVDGGMELLQQGLTVGTWGNLSVKDPETGLVYIKPSGMPYTSITPQDI  
VVMDERGAIVDGHRKPSIEFHLHLSIMRARSDFAVIHHPYSSVFGVLRDIPAISED  
FAQIVGDRASCCVYALPGTEELAKNVVSLGEGKAVLIPNHGTVCVGH TLDEAMKVA AVV  
EKTAHIYLLARSIGTPHVLPHEDIVVMQDFMRNSYGGQK\*

>SPBDM4\_v1\_50905|ID:27159268| Putative signaling protein (fragment) [Uncultured spirochete bdmA 4]

MAKEWIHRLSLLDIFREYFGSGRDFNA AVLKILRIIRETLHADSICLYIQNADGSLT SKD  
YDGFLSDLIRDATIPPGQKNVGLAAEERRIIAADDLATNPDYVPHFRDLIEREKFTQYC  
IPVILANEARAVLELFFRAPFKPDET WLAFGQAAA YQIGIALQM QNIIEELDKTYRDLQR  
ANESII EGLSSALEFRDEETEGHTLRVTALFMSFASRFIQDENELKKLRIGSLFHDIGKI  
GISDAILNKPGPLTFEERIEMQKHPLISKAILSRIPSLHEYIDIPLYHHEKYDGTGY PFG  
LKGEGIPLSARIFAITDVYEALTS DRPYRKAWSKEKALEYIRDNAGTHFDPELALCFVEM  
NMD\*

>SPBDM4\_v1\_50906|ID:27159269| transposase [Uncultured spirochete bdmA 4]

MKSISDILGGLQILLEV SFDIQAGFEEYLT KDQRTFLAILRVIEEHLRVPYEAESRYGRP  
AYSINPFIRAFWAKSYFRLLTMDDLRKRLSDPNLRMICGFTKVPSLATFSRRMSLLSES  
SLMEKSFETMVSEYYAGSIVGDVARDSTAIAAREKPCNKKSDVALPKPKKYRRGRPRKGE  
ERPRKAPPVVAQH TTMSLEEALHTLDTRCSWGCKKNSQGNVSYWKG YKVHLDVTDAGIPI  
SVVVTGARVHDSQVAIPLERMTEARVTHLYSLMDAA YSDTIRSFIERGRVPLIDHNKR  
KADTRPPFPDASQRRYAIRT TVERTNSHLKDWFLSSPYFVKGIKKVSFQIMCGVLCLTAL  
KILQYFIAPAMR\*

>SPBDM4\_v1\_50907|ID:27159270| protein of unknown function [Uncultured spirochete bdmA 4]

MTILPENTDLNVLIIEDNKDDTELLVYQLKKA FKSLHYTHIQNLKEYLEALRQVAESES  
TEPERHNVLSDWAVPGYDCFAALEALHKIKQIIPFIIVSGAIGEPTAVALIKAGAYDFV  
LKEQSSRLSYIIPKALEWAEQRKTDETQRLQIELQNKALQASPIAIAILNGQGAFEVVNQ  
AYEMLTGWAIQELKGRYLWGFCGEVSSKNCMQVFQELKNKDIHQWEGTGTRKDGSRYHEF  
RQMVKLSADNAVQQYLLIRQDITSLKQYRSRLEIDAELPLILANCQTETSIIYEEASAYI  
KRAFGIQRAGFIRIDEGGEKILRWLGDDMEESLSREGAHGTQYPVLVDGKSRAICTVDWN  
APIEGTNILISYRGSFKSHEMSEF\*

>SPBDM4\_v1\_50908|ID:27159271| Response regulator receiver domain protein [Uncultured spirochete bdmA 4]

MELNAPHVTILIVEDNPDDAELAVIALRQKGIKTPYRIAKNADEALEIALGRRAAESESD  
AVNSGNTAVTTPSLVLLDLKLPGRSGIEVLKELRAAPTTRYVPIVVLTTSVLEEDMIQSY  
ENGANSFIRKPVDFSTFLREIDL VCHYWLETNLQPKKNSV\*

>SPBDM4\_v1\_50909|ID:27159272| putative Histidine kinase [Uncultured spirochete bdmA 4]

LVTTLFQNVTILISIYVLYHFISRSFKGKPWAISIINGIFLGATAILAMLTPFKIEEGIF  
YDARSIVIGIAGFFGGPLTGTIAAAFALAFRISLGGAGVIPGSLSIISAMILSTIAARLR  
PRYQPFAEKHKFATPIGTWFLGFLIHVCVILSQFLLPDGKWHEVIPLMLFPYLVI FPPVF  
SLICLLFLDNERLAQASKDLAESEARYRSLFQNQHTAMLIIDPPTGRILDANPAEAFY G  
WDRATLTTMRVQDINTLSEAEVKVDL DLARIKKNVVFYFKHRRANAEPVDVEVYTGPI SI  
HGKELLFSIVHDISQRVHAEQELKALTETLEQQVKKRTEELEAKTQRLTEL NREHESFVY  
SVSHDLRAPLRAIAGFSTILGDLLHENLPNAPHQQETFKNRIEEINHLLNRIQENANRMQ  
KLITDMLMLSRAGTRTLNPRSIDLSLIAQEIINEETEDKKERHLECNVQKNLHAFADPDL  
ARILLANLISNALKFTQKR DVARIEIGSAQREGKNVFIYIRDNGAGFNVEAAGDRLFAPFQ  
RFHEAVEFEGTGIGLSIIKRVTARHGGSVTVESVPGQGTTFYDFDFGEAQ\*

>SPBDM4\_v1\_50910|ID:27159273| Biotin/lipoate A/B protein ligase [Uncultured spirochete bdmA 4]

MAYEFRLLETGFHRAAFNMGLDEALLRSVAEGRSLPTLRFYGWAPPAVSIGYFQGLHEEV  
DAAACKTAGIDVVRITGGGAVFHHHEVTYSIVLPLSHPLARPNILDSYRLLLGGIIEGL  
SILGIEAEFAPINDIAGGKKISGNAQTRKLGCLLQHGTIILDVDVDRMFTVLKVPQEKT  
RGKLIVDIKSRVTSIKHCLPQSESMSFETLYATTIQSLKKGFAKALNLALVSSVPTEAEL  
QLAEQLAQEKFSQTWITLR\*

>SPBDM4\_v1\_50911|ID:27159274| conserved protein of unknown function [Uncultured spirochete bdmA 4]

MRLELVGKPEGCKLLRMTIDVEPPLVPSSRIRLSIRGDFFAVPEEAFDELEHKLEGTTL  
EELGKKFDGLVRQNGLECLGITGSGLDEIIQKELHNGI\*

>SPBDM4\_v1\_50912|ID:27159275|lipA| Lipoyl synthase [Uncultured spirochete bdmA 4]  
MQSAQFKPKPSWLKVQLPHGNEWRHVEEV LASHDLHTVCDEARCPNKGECWGAGTATFMI  
MGDICTRGCRCFCVKTARRGGPLDPEEPRHLAEAVKSLGLRYAVITSVDRDDLPRGAGH  
FAACIHAIRELSPDTKIEALIPDYTGTELAQVLAARPDM LAHNIETVRR LQSIRDHRASF  
NKSLQTLRAAHAAGIPTKSSLLLGLGETEDEVEALEELQGAGVSSVVMGQYLQPTPKEI  
PVVEYITPEQFADYARKAKSLGFASVISAPFARTSFHAREAWVASREEAGA\*

>SPBDM4\_v1\_50913|ID:27159276|mtnA| Methylthioribose-1-phosphate isomerase [Uncultured spirochete bdmA 4]  
MHEFRSVALDDTRDELVILDQTRL PNEIVYLRLSRLEDVWEAIRNLRVRGAPAIGIAAY  
GAYLAVRNGGAETLEEAV ALFNQAKQHLETSRPTAVNLFWALNRMAQRLAVALHSEPRPA  
SSASVANLINALKEEADSIHDEDSRMCRAIGEHALSLLQKGWGLLTHCNAGALATSELG  
TALAPIYLG NQRNYRFKVFADETRPLLQGARLTAWELSEADIDVTLICDNMAATVMKQGL  
VRAVLVGC DRVAANGDAANKIGTLGVAILAKHYGIPFYVLGPTSTIDLECPNGASIAIEE  
RAGDEITAKWYISRMAPQNIKTYNPAFDVTDASLITAIITEKGIARPPFEKSLKEFVQ\*

>SPBDM4\_v1\_50914|ID:27159277| putative DNA modification/repair radical SAM protein [Uncultured spirochete bdmA 4]

MDRLDTLRILSRAADWDAAAPSARIEQGVPPHACREDTKDQPAAVMPCPNPQVREEAAYG  
ICRLKRLGGGSVPILKVLLSNACSYNCA YCVNRRSSNVHRASFQPEELARTIADFDARGV  
IQGAFISSGV LGTPDETMERLIWMARSLRERYGYRGYLHLKVIPGASPELVRLAMRYATR  
VSVNIELPSEESLLRIAPDKNPDAILTPMMTISDRLCELAEIKCQRVSSQSPKYGRQREA  
SEIAASGPFSVMSAGQTTQLIVGASPEPDSVILGLAQYLYKSFNVRRVYYSAFRPEGTDP  
SLPHPATPPYMREFRLYQADMLFRWYGFEPQELFESCDLDEDLDPKTSWALRNIAFFPV  
ELMAADFTQLVRVPGIGPNSARKILELRRAGRLNSSSLRKLRLKYASWFITLRGKAPS  
ENLQFSSEAPANCTLDHPEILHEFLREKKPAPPPINPELDFLS\*

>SPBDM4\_v1\_50915|ID:27159278| conserved protein of unknown function [Uncultured spirochete bdmA 4]  
MAEWHDEKYKEVFDGTVSGLHRRRAVDPNFSIEEAENQLAHL YILDGNDWLGRGALGDIV  
SQATIAAYELFIHEWKVEGGGKNGG\*

>SPBDM4\_v1\_50916|ID:27159279| conserved protein of unknown function [Uncultured spirochete bdmA 4]  
MAVEIRKVDGSKDLRQFIDFPVRLYRDVTNYVPAPRLDEVRTL RKDKNPAFEFCEAEYWT  
AWRDGRLVGRIAGIINHRFIEKWGNKWARFGWIDFIDDSEVSKILLETVEQWAASKGMSA  
VHGPLGFTDL DREGMLVDGFGERATIATINYPPYPQHLEKLG YRKDVDWFQFQIFTPKE  
IPEKVQHVT ELLAKRSGVHLYEWDKRVIVKKFGRELFR LIDETYSTLYGTTPLTERQVD  
TYIKQYLG FVDPRFTKILVDDQERLVGFGISMPSLSEAFYRSHGRLFPLGWYRVLQALKH  
PRVLDL YLVSVKPEYQARGVLAIVMNALQRSAL EAGVEYAETNLELEDNVKVQSIWKDYP  
KRQHKNRVYLKEI\*

>SPBDM4\_v1\_50917|ID:27159280| putative Peptidase M22 glycoprotease [Uncultured spirochete bdmA 4]  
MIVLSIDTSCPTLKIGVCRERLLASSILEPPVTHAETIVPAMERVLQSAGIGKKEIELLA  
VAGGPGSFTGLRIGIATAKGISLGLGVPMVLVPTLDVYGMVWRDLHGIVVPVLDARKHRI  
YCALYHRGEKIGRWMDIELTDIIAKLQAE EEVHFVGPDA DFAETTCLERPGWTIHSPEPE  
KEIEALAMLGAGIYKEKGAEDSAGPMYLREPEIGEPLAR\*

>SPBDM4\_v1\_50918|ID:27159281| tRNA threonylcarbamoyladenosine biosynthesis protein Tsae (modular protein) [Uncultured spirochete bdmA 4]

MSAKHSIKTKVQHKGGSVLIFLSSPHVHRTLAVGRAIGHAAPDGAVISFRGDIGAGKTTL  
AKGIAEGLGIAEPVISPTYTIISEYYGRLHLVHIDAYRLSGEDEF LQTGGEELLGAPGTL  
SLIEWSERIADILPPESQRITITVEANGDRLMMIEGDWIEKIDWKRF AIRREVIQ\*

>SPBDM4\_v1\_50919|ID:27159282| Alpha/beta fold family hydrolase [Uncultured spirochete bdmA 4]  
MEKFSASDKKELAYLRFDPKGGPKAVVLIGHGMNDHKERFIPLAEALASIGVSCWIPDLR  
GHGDTDPDVNKGYLADTDGFERVVQDLIEMGDYASKSLGELPLFYFGHSFGALLGLALIA  
TNGKYLEGAVLSAPPERQSPVMDKLGWIVNLGGALKGLHAPAHLPNQMTFGQYAKTVQN  
ARTRFDWLTRDSAVVDAYIADPKCNFVCTYGFYRDLINGLRKVY GEGFLESIPPTLPLFL  
FCGSADPVIGMKEGYEKLIQEFKLLGIIDFESKCYEGGRHESLNEINREEVLDNIVDWFS  
RHIR\*

>SPBDM4\_v1\_50920|ID:27159283| Poly(A) polymerase [Uncultured spirochete bdmA 4]

VRIRYYRNANGGLQAKARVFDQTEHVIDVAGVDREAITIVKRLASHGYSAIYVGGAVRDL  
LLGNRPKDFDIVTDALPNRIRKIFSNSRIIGRRFKLVHVVYANRKIYEVSTFRSLSTGTIG  
NEYGTIDEDVQRDFTVNALYYDPLASEVLDLFLGGVDDLRSKRLKAIPLDRIFREDPVR  
MVRGVKYAAVNHFVLSISLRFAIHRDAALLTEVSPSRLAEFYKIIASGKSAAVIQALDK  
FGLLQYLLPEVYASIHGDKTFREAFFQNLSSLDLSTQAPEDTSLNSASAAEIVQSDRRL  
ISPFLGWFIQRRLRSFAKQENVSRDPPLFRQEAFSDIRAFLTPLNLPRVALEEAMEQVLQ  
EDALLPAPLPPKRRKRGRPRRKKPKLHAESAHLDPDANLQ\*

>SPBDM4\_v1\_50921|ID:27159284|gsiC| Glutathione transport system permease protein GsiC [Uncultured spirochete bdmA 4]

MNFIKYAAKRFLRLILTIFIISTIIFVIRVIPGDPALVIGGVDAASPSDIQAIRAKLGTD  
RPLSVQYVEFLWSILRLDFGRSMISDEPVISLILQRFPLTFTLAVLGLLIGILIAIPLGV  
LSAVKRWSGWDYGLVFSQLGMAIPSWLGLILLLLLAIKFPIFPLFGADSPAGLVLPAL  
SLGVGRAAILLRHTRASMIEELSKEYVVAARAKGLPESVIRYKHALKNALLPIITIAGIE  
FGYMLGGAIIEQVFSPLPGLGRLFLYAIYQRDFPLIQGGVVFIALIFSLVNFVADMLYSI  
VNPKIRLE\*

>SPBDM4\_v1\_50922|ID:27159285|dppD| dipeptide transporter ; ATP-binding component of ABC superfamily [Uncultured spirochete bdmA 4]

MNTTEPIITENLRVEFTQERQKAFALRGIDIAFYKDEIHGLVGESGSGKTVTAMSIMGL  
LPKPAATILSGSIRYEGKELLSLSEDALRTYRGSKIAMVFQEPAYLNPAFTVGEQIREM  
VMLHKGLNKHQAEMRARELLGLVGLGKDGALGAYPHELSSGMKQRAMIAIAISCDPDL  
IADEPTTSLDVTLLQLKLLKILKKMKRMGMLFISHDLVIREIADRVSVIYAGKIVES  
ASVARLFEHQMHYPYTRLLLLSIPDARHRGKKLATIAGQVLDATNDPQGCVFAPRCPLAKE  
LCYRESPKLIAHEQGHTSACHFAEEAWDL\*

>SPBDM4\_v1\_50923|ID:27159286| Peptide ABC transporter ATP-binding protein (fragment) [Uncultured spirochete bdmA 4]

MGPLIQCRNIVKIHRRGRGIDGAKRGFKAVDDVSFSIEKNGNFGLVGESGCGKTTLARAIL  
YLDPPTSGKVLFDGVDLGLSLRSRNLRAFRRRMQIVFQDPHSSLDPRMTIYDSLSEGLVNI  
GMDRAARTKKINRLDLVGISGAMGSRFPHEFSTGQRQRIVARALTMDPEFLVLDEPVS  
NLDVSIQAQVINLLLDIKEELSLTYLFISHDINLVA YMCDTVAVMYKGGKIVEQEPTTELF  
ANPKNEYTQTLASIPGGAGRISGASTNIAKDGTMGNTASAVRELSKGHVVSNTTGRTGD  
KPDLTGGTR\*

>SPBDM4\_v1\_50924|ID:27159287| Dipeptide-binding ABC transporter, periplasmic substrate-binding component [Uncultured spirochete bdmA 4]

MRRVLKHCILPGLFACIFAGVLFQAQPGTLVFGLSGNPDTLDPQKTAGTLTFQVVKSFYD  
TLVEPDQSGKIVPALAESWSVSPDGLTWTFRLRRDVVFHNGQQFTSKDVKATLDRIVDEK  
TASPKRSEFSAIKEIRTPDAYTVVLSLSQPYAPLLASLASGWGAILPSGLIASGHNFGAE  
PVGTPGPKFEKWIRDSRISMTRNDKYWIKGLPKLAKVEFQIVPERAVQVQGLGVGSIDAL  
EFVDPDDLPIQLTNPVKTIKKELTSLIMVMAMNCSREPLNDRVRQAVNYAIDKQVVLDV  
AYGGGKIGSTFLDTGNAYYTDNSNLYPYNPEKAKQLLKDAGVGNREFTITVPQNYPLHVK  
AAELMQMLAKVGMNVKLQLVDWSTWLSMYSGGNYDFTVIGHTGKLDPDGTLAGYGAGR  
YVKWYNATVDIKEATTISDFAARKKLYTDALEIMANEVPFVYIGTSYRYVGTRSNVFD  
FRMTPNLDTFDFRWTEMR\*

>SPBDM4\_v1\_50925|ID:27159288|gsiD| Glutathione transport system permease protein GsiD [Uncultured spirochete bdmA 4]

MVLKRTRRILFSLASLYLLVLVALAIAAPLVSPYSPTEQFLDRRFHPPGPTNFLGTDNFG  
RDILTRIIYGSRSALVVGIVTVSVALLLGGAVGLIAGMGPPAIDSALMLLMDSVLSFPTI  
LLAITIVSFMGYGLVQVMLALGISSPIFARLIRAETLSIKTEGYIEASRALGTGPVKIV  
FRHIIPNIMSKVIVQCSLTFAQAVVIESSLSFLGVGIQPPAASWGLMLKDARNYL VQAPW  
MAIYPGLCLALTVLSFNIIGDSLSEFNPRLNDLV\*

>SPBDM4\_v1\_50926|ID:27159289|fhs| Formate--tetrahydrofolate ligase [Uncultured spirochete bdmA 4]

MSVIRINPVPDDVDIAQSADIKSISDIASRYGLGEKYLEHYGVDKAKVRLEFLAERRGQT  
KRAKYIDVTAITPTPLGEGKTTTTIGLTQQLGYIGKKAIAATIRQPSMGPTFGIKGGAAGG  
GYSQIVPMTDFNLHLTGDIHAVSAAHNLCAAALDARMYHESRWSDSYFEKLGLKKNLNDP  
YSVLWRRVVDMNDRTLRSMIIGMGGQENGLRETGFDISVASEVMAVLALATSLEDLRRR

LGKIVVALDKAGNAVTTEDIGVAGAMTILMKDALKPNALQTLEEQLAFVHAGPFANIAHG  
NSSIAADMIATQIADYVVTESGFGADMGEKFMEDIKCRASGLMPDAAVLVVTVRALKMHG  
GGPKVTPGKPLSSAYTQENLELLQKGLANMVAHIGIHKQYGIPAVVSINAFPTDTEAEHA  
LIQEAAALRAGAADA VISKGWALGGEGTAELAAAVDKAASLPHEPKFLYPLEMPLKEKIET  
IAREVYGAGSVVYTPEADAAIEKYTALGYGSSPICMAKTQYSLSHDPLLKGVPKGFEPV  
REIRLSAGAGFVVPMTGEITTMPGLPSKPAYIGMDIDTATGRITGLS\*

>SPBDM4\_v1\_50927|ID:27159290| protein of unknown function [Uncultured spirochete bdmA 4]  
MLTSLGLLFHYTHVDAEKLSSLSDDEELRLLAEKMGIIYVPEGLDRVFLIEEIIDAFEDDT  
AEKSFSDHAPDHVEEKLTGTGFIPGRLEEIAIPDHNETYIVAIVRDPLWIFSFDIAE  
SVREKIIAEMDEPKLLLRVSESNEAESAFHYEISANFDDRKYINVPYAKRSYRIDLCVA  
KFQKIKVLARSNIVRMP SQYMDMSVKLPQMTKSLLLSGSEELHLIEPKEENSMRILSID  
GE\*

>SPBDM4\_v1\_50928|ID:27159291| conserved protein of unknown function [Uncultured spirochete bdmA 4]  
MASPPLIALVLNAHLPFVRKPQFTQFYEEERWLFVISETYLPLLRFKLELENIPFKVS  
MVFSPTLLAMLSDSLLCERYVTYLDNQIELAEKEKNRLAGNAVFEPLANMYYDMYRRNRD  
EFENLHGRNITRAFDFYFSKKG YIELMTTAAATHAFLPIYADFPEVIDAQIETAIITHRAEF  
GKNPAGFWMPQLGWYKGLEKHLRAYNIKYTIVTTKGALLGTPLPFYGSFSPVMTPSHVAA  
FIRDAGATKAVWSETEGYPAHPVYRDFYRDIGYDLDTAYLSPYLTGIDRGYTGFKYWAVT  
GKTDIKRPYEPAAASAQAVSHAHEYLSDRKTQARAASFWMKDRPPLIVCPYDAELFGHWW  
FEGQLQFLEAFFRASSRKDEDNPIRLVTLSEYLAEHPECPESEPEFSSWAEGGYAEAWLDG  
RNDWVHRHTRKAAERMREL TIRFPNESGLRERILNQAAREVLLAMSSDWALLRSGRSAD  
FAGRQIRESIYNFNHIYEMLSAHTVETEWLNTLEKRHNIFPHMNYRVFSPKK\*

>SPBDM4\_v1\_50929|ID:27159292|purA| Adenylosuccinate synthetase [Uncultured spirochete bdmA 4]  
VNVVIIIGAQWGDEGKGVDFLASDAQIVVRFSGGANAGHTIVLGGEKYALHLVPSGILY  
PDKTVILGSGMVIDPEALFKELEDLEKKGVDWKGRVLISDRAHLVLPYREMDREAERHR  
SKPIGTTGRGIGVAYS LKASRDGIRLADIDDEERLVNITDEDRAWLSLWKDRLLPLKIDM  
VAYLRQHRNTWRLFEGAQGALLDIDTGTYPFVSSGMSCAAGAAAQGGIGPRGIDRVLGVF  
KAYSTRVGNPFPTEFADDSAGSL SQYIRTVGNEYGTTTGRPRRCGYLDLVALRYACTVN  
SIDRLVLTHIDVYDGLLEEFACIGYRIDGQMREDFPASVRNLERAEPVLR TFSGWKTALG  
TCRTYEELPLRAREYIEFIEEFTETPISIVSVGSDRNHTIVRESPWIK\*

>SPBDM4\_v1\_50930|ID:27159293|guaA| GMP synthase [glutamine-hydrolyzing] [Uncultured spirochete bdmA 4]  
MDKIIILDFGSQYTLIGRRIRELGVYSEIVPGERVADAALLQDCVGVLSGSPYSAWRE  
GSPAPDLNMLESGPLLAICYGIQWLTIHAGGSVERCDTREYGSMPVHLLPAARGTEAWG  
AFTDGLPERFVSWMSHGDSIVRPGNGWETIGVSEAGVPAILAHA AKPWFG LQFHPEVSHC  
EHGMEILSRFVFNVC GARRGWSMEAYLEQEARHLRARVGTPEVLLISGGVDSTVAGAF  
LKSVSPEQVYLLYIDTGLMRKAENEEVMRNL SRLGARHIEGVDAEAQFLGALS GVSEPEQ  
KRHIIGDMFMKVQEEAVARLGIPDAFLA QGTLYTDLIESGKG VGNKAQVIKSHHNVR SPL  
IEKKRAEGRVIEPLDRLYKDEVRALGRMLGLPEEIVGRHPFPGLGVRILGDITKEKCD  
ILREADSIFIGELRDRGLYDRIWQAF CVLLPVRSVGVGTGDERAYKYVVALRAIESEDGMT  
AQPYAFDSKDLFEISA AITNRVPQIGRVVYDISSKPPATIEWE\*

>SPBDM4\_v1\_50931|ID:27159294| putative L-lysine 2,3-aminomutase [Uncultured spirochete bdmA 4]  
MQDFVAEGGLPYRATPFWLSLADEEPKACARNAHGVPVDPILAQTLPSPAEALISPLELR  
DPLGEAGNTIFGRAVRQYRSRILVRATGQCFLFCRHCYRRALLPSELHFLDEAAIAALSE  
YLAIHPEVREVLVSGGDPLTASDAQLAVLFEAIRSVPLPVLIRICTRAPIVLPARVTPEL  
VDLLARARPLTMVLHINHPKELSAPFLDRAEALMKAGIPLHSQTVLLRGINDAPDILIEL  
FSALSLRGIRPYLYFQGD LAAGTAHFRVPLSRGLAIYETLRKELSGLELPRYAVDAPGGG  
GKIYLP EGIVERKAKSWVLRASDGS LHEYP EEE\*

>SPBDM4\_v1\_50932|ID:27159295| conserved protein of unknown function [Uncultured spirochete bdmA 4]  
VKSITIHGIDAALDKKITEKSKEYGLSQNR TVKAILQNSLLPDQKTSKREMFADLFGKWT  
ENEKKA FDTRIEDLETTDVS DWTT\*

>SPBDM4\_v1\_50933|ID:27159296| PilT protein domain protein [Uncultured spirochete bdmA 4]  
MKKILLDTNAYS AFMAGDTCVFDSMIEAEVIYISTV MLGELFAGFYGGQKFNQNNDELRR  
FLSKDSIHVIDVTIETAEIFGEIKSDLVKQGTMIPLNDIWI AHTIETGSKLITYDEHFK  
HVNGLRVWEELR\*

>SPBDM4\_v1\_50934|ID:27159297| CcdB antidote CcdA (fragment) [Uncultured spirochete bdmA 4]  
MLVFYNI DAPKKPTNVTINS D L L L KAKELKLNIS SVLENALAEKVRQEKRKEWLKENADA  
IASYNKVI EDNGVFS DKVRTF\*

>SPBDM4\_v1\_50935|ID:27159298| CcdB-like toxin protein [Uncultured spirochete bdmA 4]  
MAQYSVYINTNQSSKLYPYVLDVQSPVLDALDTRLVIPLALKGDFGDKEIHHLTPSISV  
KGAEYLV LTPQMAAIHRQYLGEFVRDCIEHRQDILASIDFLITGF\*

>SPBDM4\_v1\_50936|ID:27159299|argR| Arginine repressor [Uncultured spirochete bdmA 4]  
MKERTERLKA I KAIKENRVDSQEKL L Q L L E D H G Y S V T Q A T L S R D L K Y L K V G K L S D G R S G  
Y Y Y S I P S E E E R R E S E R H Y I Q D F L R G Y V S I D W N Q S I A V V R T F S G H S D S V A L A I D N M G F D E V  
I G T I S G R D N V V F I A L K K G V N G D D F I H S L K E K I P D F E E E \*

>SPBDM4\_v1\_50937|ID:27159300| conserved protein of unknown function [Uncultured spirochete bdmA 4]  
MDENNERSQARTQTTERPPLPKDFRAIVMYGMSKEEALAIMKAVKAISPSMRDTAFAMTT  
DTNIAWPLGQLIAELGEEHRMMRKWTDAQRTKPE\*

>SPBDM4\_v1\_50938|ID:27159301|clpB| protein disaggregation chaperone [Uncultured spirochete bdmA 4]  
MNYEQFTLKAQEALRDATSVAQKNDHSSIEPEHLLASLMEQEGGVVPSLLERLGIDRARL  
EHGNAELMKKLPKAYGEAAQVYFSPAMQKIMAKAEAESKAMKDEFVASEHLFLALIAVES  
RVAALMKSSGITREGALAVLKSIRGSQSASDENAEKYQVLEKYTRDLTALAHEGKLDPV  
IGRDEEIRRMQVLSRRTKNNPVLIGEPGVGKTAIVEGLAQRIISGDVPDSLKNKLLAL  
DLGSLVAGRKFRGEFEERLKA VINEIGKSDGKIILFIDELHTLVGAGAAEGAMDASNLLK  
PALARGELRAIGATTLE YRKHIEKDAAFERRFQPVYCAPPSVEDTIAILRGLKERYEVH  
HGV RIRDDALIAAAELSDRYITSRFLPKAIDL VDEAA SRLKMEIESQPTELDQIQRCLI  
QLRMEANALKKENDPASVERRGKLEKEIADLSEKRDTMVARWQKEKQVIEDIRQLKQKIE  
EYKVEIDQLVRDQQLAKASEIKYGRVETQRKLEELSKKVQEEKDTPRLLREEVSDEDIA  
RVVSLWTGIPVSKMLSSEM QKYVELEKQLAKRVIGQEGALRAVADAIRNRAGLSDPRRP  
LGSFLFLGPTGVGKTELAKALAEFLFNDERALTRIDMSEYMEKYSVSR LIGAPPGYVGYE  
EGGQLTEAVRRRPYSVVL FDEVEKAHSEVFNVLQMLDDGRLTDGQGRVVD FRNAIIIMT  
SNIGSEFILTMKSMDEVRSRIDDLLKNYFKPEFLNRIDEIVVFDRLDESMIRKITDLRLG  
ELAGRLAQRNIALTVDDAARDYIAKEGFDQQFGARPLKRAIQN LLENPIAKKLLAGQILE  
GDAVRVGM S G D E L A I G T E R T A \*

>SPBDM4\_v1\_50939|ID:27159302| putative Hydrolase, TatD family [Uncultured spirochete bdmA 4]  
MSGVFTDSHAHLEMVAQRLGVFALDGVVAAYAAQPGELIFDIGVDPGDLGRRRALVEKSL  
AGMAEEP GAGPARAIELPIRWAAGIWP GREALDNP KASLEALERDIGAEIDALGECGLDY  
HHMDAGPEAQRELF GAQIELALSHRLPLIVHSREAFQDTFALVQSCARHIPTIIHCFGYG  
PEEADSFLRAGCYLSFAGNITYKKSQPLRDALALVPEERL LLETDAPYMNPM PHRGK PSS  
SLDIERTYQVVSTLRGLDIEALRISVSSNLRRILGMSP\*

>SPBDM4\_v1\_50940|ID:27159303| Metallo-beta-lactamase domain protein [Uncultured spirochete bdmA 4]  
MKIIMLVENVVYAGGLSAEHGLSLYIEHGGHRFLFDTGQGDRFLKNAQALGV DIEKVEAL  
IVSHGHYDHAGGLKAFCRANTS AKIFIKEGFFEPKYNKDKKFIGIPYDKELFEDRLQRVS  
HPKEIFPGVHLM TGIPLANVWDTHFDNLFVMRNGDLEPDRFADEQFLVIEEEDAVISG  
CSHRGITNIVRAAAEAFADRSARHSAGPLAQGDS PGQGP K F R L V L G G F H L N N A D G E L A D R  
VIHTLDEFHIERLGCCHCTGIENYARIKSVFGQRAFYSWTGTELA F\*

>SPBDM4\_v1\_50941|ID:27159304| protein of unknown function [Uncultured spirochete bdmA 4]  
MRLCNG LREYGA KMMRGGKEFRFGPTFTWYILSAML LSVFLAGCDRAPIHATVDEAFALV  
YPELSSKVVEFPPIPI NTREGAKNSDAYLPYPLQPGRIEALVNALDDKNRPKASERAGS  
ASPIQIFVTSPA VAETFP S R L D A H T V G I N L L A P A D S F F S V E W D S E W A Y R E L G L I A G Y R L  
ASLQKKEDAAASAAILFSRGTGRGQKELDAFTQSFEKGFRLAGSRASAPLPPAGALS VFD  
VESMGLPGNHLEQVLSALRQAEDRKPRLLVLASGSR L A L E K A I G M K D I D I M A D V R S L G P D  
LPVKKIFA AIGENTPALISAIRNLA KKIEEGDAALETVRVYPTIVLSKEAKHIRAIVDEE  
TPKAAK\*

>SPBDM4\_v1\_50942|ID:27159305|fba| Fructose-bisphosphate aldolase [Uncultured spirochete bdmA 4]  
MTSYKELGLVNSLEIFRKAMKGGY AIPAYNFNNMEQLQAIQACVETKSPVILQVSSGAR  
KYANATLLRYMAKGAVEYSKELGYAIPVLHLDHGDSFELCVDCIENG FSSVMIDGSHLP  
YDENVALTKKVVEFAHAQKDYVTVEGELGVLAGIEDAVSAEMSHYTRPEEVEDFVKKTG V  
DSL AISIGTSHGRAKFKPEQCTRTADGVLLPPPLRFDILEEVQKRIPGFPIVLHGSSSV P

VEYVRTIEQYGGKLPDSVGIPEEQRLKAAARSVCKINIDSDGRLAMTAMVRKVLSEHPEE  
 FDPKRYLGPAREDELKKLYMHKNIEVLGSANHA\*

>SPBDM4\_v1\_50943|ID:27159306|infC| protein chain initiation factor IF-3 [Uncultured spirochete bdmA 4]  
 LAEKDLRINEQIRVREVRIDEHGEQRGIVSTLEALRIAREAGLDLVEVAPQSVPPVCRL  
 LNYGKFKFEQEKVKDAKKRSKVTTELKEIRMQPKIAEHDLDLDFKANHVRSFLDEGNKVKVT  
 IRFRGRELAHTEIGEEILQRILAKLENSFVLERPPSMEGRFMSMVLQPKAGAAKKQPEGD  
 TATTAPGSEH\*

>SPBDM4\_v1\_50944|ID:27159307|rpmI| 50S ribosomal subunit protein L35 [Uncultured spirochete bdmA 4]  
 MPKMKTKKAAAKRYTLTAGGKIKYKKMNLRHILTKKTTKRKRNLKAGFLDAGPVYQIRK  
 KLLPYG\*

>SPBDM4\_v1\_50945|ID:27159308|rpIT| 50S ribosomal subunit protein L20 [Uncultured spirochete bdmA 4]  
 MPRAVDGTRRKDHRKILKIAKGYWGRRHSNYKVAKDAVAKALSDAYKDRRDKKGVYRRL  
 WIARINAACRMRDLSYSRFIGLAKAEVKIDRKMMLADIAVRDPAAFDVIVEKAKAALQG\*

>SPBDM4\_v1\_50946|ID:27159309| protein of unknown function [Uncultured spirochete bdmA 4]  
 MLNLEQVRALEARVEKAVVLITKLRQENADQERRLADAAKSEELLKSQNAELERQLAVQA  
 RAVTENSRRLEGLVARAKEAEEKAAQAELEAAEERAAAMERKAQAADDEIAHYRERAL  
 TAERRVAELESKAEELKSEQDRIEQGLIQALSCLDSFEDMVLEMSLGSSESAELPAQEQ  
 ETASRAPEETRLGQQPPGRKAQDTSESDQGGGSVQEPDENSQPDLESQDAPFRGGENELD  
 IF\*

>SPBDM4\_v1\_50947|ID:27159310| protein of unknown function [Uncultured spirochete bdmA 4]  
 MSSISSNQPMHIEILGQSFSIKTDDSPYIQNLVDELKQRYARISSRMNVADPLRVAILA  
 GLFLLDDVKMQNQTLPGRGGRTAANGSPAGHASNTSRTGNESGNPQPSNVNFDEEQILA  
 QLDKRLGELGL\*

>SPBDM4\_v1\_50948|ID:27159311|rpoZ| DNA-directed RNA polymerase subunit omega [Uncultured spirochete  
 bdmA 4]  
 MIMPLESLINFSGNAYELAAAVSMRAYQLAVLRTPEVEKNNNGKVVSMATQEILDKTIGYK  
 LIAG\*

>SPBDM4\_v1\_50949|ID:27159312|miaA| tRNA dimethylallyltransferase 1 [Uncultured spirochete bdmA 4]  
 LPVDAVILAGPTASGKTDLDDAVFGAGASTWVPRLRDAWQTDFFSAEIIASDSMQAYRGM  
 DIGTAKPSKDLLSRLPHHLIDIKNPDEQYTAGEFVTRADALSSELSGRDVLPIISGGTGF  
 YLMNYICGLPASPPSSPEIRAQVAADLTRLGPAALRAELEEADPATASRIHEHDLYRLTR  
 AVEILRTSGEAPSRFAPSKMVRPGKRFLILGASRTREVLHARIHARVEAMMRAGLAHEVE  
 CLVSRGFGPEDAGMQAIGYREFFELAGSSSETIAEAIELHTHQYAKRQMTFFRALPGLQW  
 IDPDPEHLFHALTNFA\*

>SPBDM4\_v1\_50950|ID:27159313| putative membrane protein [Uncultured spirochete bdmA 4]  
 MKTPLLMTILFSILPISELRGAIPYAVYNGFSIPLAAAISIAANVCVPLIAFLFLESFHK  
 LFYKIKPYKKFFDRFVENARKRVHKGVEKYGYWGLLIFVAVPLPVTGAWTGALGAWVLGL  
 SYKKAFFAIAGGVVAGIIVSVLVALWGVGTQTIFFKTMH\*

>SPBDM4\_v1\_50951|ID:27159314|pcrA| ATP-dependent DNA helicase PcrA [Uncultured spirochete bdmA 4]  
 MHIDFQAELDPEQYAAVTAIDGSVLIAGAGSGKTRVITYRIAYLLAKAVPQEAILALTF  
 TNKAAKEMVERAHGLTGLALKNLMMVSTFHSFGAWMLRKEAGVLGYRSNFSIYDEQDRIHA  
 IRESARELGMSNEQLDPARLSQLFSARRAGYGKQGELSERELELYDLRKTIKVYNALDF  
 DDLIALPLELLREHEDVRERYRSRFHYIMIDEFQDTSLQQYEFIRYIESGNICVVGDDDQ  
 SIYSWRGADFRNIERFELDHPGLAEIKLERNYRSTGSILTAANTVIAHNRRRKKKQLWSP  
 QGVRGTPITLFEAEDDEDEAERIIARIRELFRERADWDDFGILVRTNSLAEGIEDRLVE  
 HNVPIRVAGGPSFYQRREIKDIIAYLKA AVNPDDDVS VLRV LNVPRRGIGRATVEFLSNI  
 AKAHSASLNCAAETARQPGFVQTKDGHLLQKALNEVFAFFDYLAQMRTALLEQKMSVSVAI  
 RKVVEDTGYWQYLLEEHKNDKAAVWKYRNIELLSASAERWEKDPDTFEKGIFAYLARIS  
 LSMRDDANEEKRLNLLTIHAAKGLEFDYVFIPGCENGILPHARSLEDGDGDIEEERLF  
 YVAVTRAKKQLFMSRAMQRKKNFSFQETAPSPFLNELPQNLIVMAEAQVQPQSEDDLKKE  
 FFSRLKSRFGA\*

>SPBDM4\_v1\_50952|ID:27159315| Methyltransferase [Uncultured spirochete bdmA 4]  
 MQGYVFHAADGFLNHLLEEVPTVTRIDDELVSSWNL YGPAPFDLRTRPVFWTRNTWLEPF  
 LLEFGSISEAARALKALQRNWSAPLRFARRTVLIAEQLPYVSSKPHTFPFQAPEAPMGS

FTLLEEHLGGSARCTSPFPNGAFDFEENKDDPPSRA YRKLWEAFVLAGQMPAPGERCID  
AGASPGGWTWALASLGASVLSIDRAPLEPRIARMPNVKWQKHAFTLRPQDIGPVDWLCS  
DVICYPEALWQWISKWMDAGLAHNYICTIKMQGDTYDRATTLKFASVPGSRVVHLWHNKH  
ELTWMKLAAWS\*

>SPBDM4\_v1\_50953|ID:27159316| Metal dependent phosphohydrolase [Uncultured spirochete bdmA 4]  
MSEISLLNALIHRFDVVVRDPVWGDVHMDASLHTLFQSKSFMVLDLDRIRQLGPVALVYPGA  
THTRKAHSLGVYHIARRMALALVEKGEIDFVSKTGLRSFLVAALCHDIGHFPYAHSLKEL  
PLARHEALAGEMIVSAPLREYVSDCGADPEQTA AIIDADRS AEESRETL LFRSFLSGVLD  
PDKIDYLTRDAFYCGVPYGIQDADYIMRRLV VHDDKLAIDMKGEMSIEALIFAKYQMYRA  
VYWHPVVRAATAMVRKAVYLG LASDVIQPASLYGLDDTSFGRLINHAKFAPFRLAREAE  
KHIYRLAAEHPFDEENPLHADLLDISKRIEAESTLAQAAEMAENDVVIDIPERIKLETDL  
MVKADDYFEAFDQRSTLFQPETVEKVASALRTIRVYIRPQSNADFKKIASLVEALLE\*

>SPBDM4\_v1\_50954|ID:27159317|mraZ| Protein MraZ [Uncultured spirochete bdmA 4]  
MKLLTGEFKNTLDEKGRSLPARLRTDLPLSLVLTQGVDTCLWLFAPEEWEELSQRILAS  
TSLFQARSRLIQRRIIAPAQEVDVDKLGRISSIPQSLRDWAGLSKECIILGISRYVEIWDS  
QKYQAYVAENQSEFLSAAEELGGLTSL\*

>SPBDM4\_v1\_50955|ID:27159318|rsmH| Ribosomal RNA small subunit methyltransferase H [Uncultured spirochete bdmA 4]  
MPAVRMVVKRPDSEQHKGGSTEFSLHVPVMLKEVCVLAASVYPLSLYIDCTLGAGGHAEAL  
LSEHPQLCCIGIDADPDACARASARLSPFSNRLSVVNAYYDDALADLCNAESQKKMIGTG  
VGGACGSGEVRA SFILFDLGLSKYQLSSSGRGSFSAD EPLDMRFSPDTPASAEDIVNQ  
LSEMKLADLIYNYGEERYSRRIARAIVETRKKKEHIRTASRLASIIAESVPPQYRYGHIHP  
ATRTRFQALRIAVNDELGRIERALADALNLLSPGGLCAVIAFHSLEDRIVKHFFAEKAKTG  
QFSLEWKKPKPESEEELRRNPPSRS AKFRAIRARGNEVKA\*

>SPBDM4\_v1\_50956|ID:27159319| exported protein of unknown function [Uncultured spirochete bdmA 4]  
MNARRFWTFAIITCLFFFGLVFQTSRYTALKSNVLSLERMEMDLLKTGKELDANIAKLAN  
LERIEKAALQNGMQIAAPEQRIIVTDIQAGKGS AQEGYPNGKQ\*

>SPBDM4\_v1\_50957|ID:27159320| UDP-N-acetylmuramoyl-tripeptide--D-alanyl-D-alanine ligase [Uncultured spirochete bdmA 4]  
MESNRETPGQQILFRAGELAGLIGGTCRGDL DAPICSVV ADSRAAAQNSMFVALRGERTD  
GHRHIPEAVQNGARTILAEIAQKDAVLASIHDLDEARASCLIFVESPRDGLQAAREYRK  
RNTLLKIGVTGSSGKTTTKECIATVLSACYPAGTVAMSPGNLNSDIGLALALFDIRPGHT  
IGIFEMGINRRGEMDELANMYEPDIAVVTNIGTAHIGIFGSREEIAKEKSKIFACFDGRQ  
KALLWENDEYKTYLASKVRGSVEYFGLQSTEGLGQVENLGLKGWKVEWKNQRIDFALPGQ  
HNLLNACAALSIANLLHLDPV CASRGLSSTRPLFGRSEIREGKITVLQDYYNANPDSMAA  
AIEFFAEIPSRHRKILVLGSMLELGKESARAHEKVGLMAGAVGSNAIFLFGDDMIAAETA  
LKSSAFKGTLFWTSDMDELSDAILNFVQEGDLVLVKGSRGMALERL TRAFEEEEKLIAPSV  
SKVGGPHAS\*

>SPBDM4\_v1\_50958|ID:27159321|mraY| phospho-N-acetylmuramoyl-pentapeptide transferase [Uncultured spirochete bdmA 4]  
MLREIFLPLIKYFTPFNIFRYLTFRSVYAAITALVICYL VGPWLIERLRVLKFGQSIRTD  
GPETHLAKTGTPMGGILIIFS VVVS VILWIDIKSEYCWIALLSLVGFGMIGAADDLLKI  
RKHSSDGLSPIQKLILQFIVSGAVVYAIYWTTGSPATKLYVPFFKVHVIDLGVFWLPIAM  
IYVTAWSNAV NITDGLDGLAVGLVIVAVLAFSVLTYVTGRADWSQYLGVPYIKQASELTV  
FNFALLGACVGF LWFNAHPAEVFMGDAGSLALGGV LGLVLSLMVKKEILLVIGGVFVVEL  
GSVMLQVLYFKLTKGKRLFRMAPLHHHFELKGLKETKVVVRLWILGGIFALIALSTLKIQ  
\*

>SPBDM4\_v1\_50959|ID:27159322| putative Lipid II flippase FtsW [Uncultured spirochete bdmA 4]  
MKKERISVQHRLESHQTDWQMIGAILV VSLIGLCALWSGSIGFAIRNGGGPYSIIGKQVI  
LYVISLACMGIMAVIPIKLLRAVLPIAVVVGIVGLALPVVTPPLGVTINNARRWIRIGSFT  
LQPSELWKPVMVLYLASFLEKRKERV AESGVA TIPAILLVAASVVL IYLQQDFSTSILVL  
AIALAMLFLAGTPIVFIGSLSLFSVLYGALMIFSSQYRVQRLVGF LMPDHHVHTVNYQMY  
RALRAIRTGGLWGKGIGLGLTKISSIPEVQSD FIFAA FVEEVGFIGVVVVMALWAFILVR  
AGKRLSRADYFSKLAGFLIALLSLQILLNLSVVTGVMPTTGLALPFFSSGGS AALMSAI

SCGILINLSRGAELAINPGMAFAMKGV AHD\*

>SPBDM4\_v1\_50960|ID:27159323| protein of unknown function [Uncultured spirochete bdmA 4]  
MTDVKVQEHTASESRIQKKKGERSLLSVSDTYSVNQLQATARRETSMPGTGTGTVAHQGY  
ESKPKAENRKTRQAGKQPLTGRIAPATIALSASAEKLSEAVKPAIQPKKHTGIRILMMVL  
VLCLLAAGTAITLPRVTKIETIRISGLETLSENAILASVGNIGNESLFSKLNELEERTIE  
QNPRVAHARA YRVLPSSLAIDIQERSAVASIMINSEQGTKLVLDGEGIAFASIDAEDSR  
NPELPPVSGIQFEHFSFGQRLPDLHLPLFAELATIKRESPELLRAFSEIRIERISGNSIE  
LLLYPVHMKTA VRLPLKFSADALRNALVVDILRSRGLGDQPSEIDFHAGTVVYQAKEAV  
SG\*

>SPBDM4\_v1\_50961|ID:27159324|ftsA| Cell division protein FtsA [Uncultured spirochete bdmA 4]  
MSGADIKAVSLALSGANIESFNTNGQIAVTGRGREITQEDIARVHEAARAVSISMDREIL  
HVIPRSYTVDDQKGINPLHMTGVRLECGVHIITGSVSTVQNMFKCVTRAGYRVEQSYLG  
ILGCARTVLTEDERDLGCLLIDIGGGTTDFMIFAESEPVFTSAVPAGGSQITGDISIMLS  
IPVDAAEHLKKEGAAWTEAIDPDETIVVPGFGAREPVELERRKLVSIVQPRVEEIFEMV  
NERLVKNGKLKELIKAGVVL TGGSALLPHIDECARSVFGVPVRIGTPAAMSGLDAEYRSPA  
FSAAVGVALLEAERTGATDPGGRKKTRKKGKQGSFSLIKWIKDRFF\*

>SPBDM4\_v1\_50962|ID:27159325|ftsZ| Cell division protein FtsZ [Uncultured spirochete bdmA 4]  
MAIELVDDNGIGSPTVIKVI GTGGGGSNAINRMIMAGLKNVQFIAVNTDLQDLGRSKAEI  
RLGVGSKITKGLGAGGKPEIGEKA AVEDRDKIEQALRGADMVFTAGLGGGTGTGSAPII  
AQTARDLGALTVAVVTRPFIFEGKVINRIAE EGFSLKQAADTVIVIPNQNLKVVDKKT  
PLKEAFRIADEVLRQGVQGISDLITLAGDINIDFADVRTVMEGQGD AIMGIGVGS GENRA  
QDAAEKAVNKPLDDARIEGARNILVNVT CGEDFSLTEYQDVIDLITSKAAEDAHIIAGV  
VSDGSLKDEVRTVIATGFGSAHQKFS DKAPS KNGVSMPLGSARSSEFLGPNEWPFREEK  
PAQDRDRPADNRDRPAPKENFGKVSFDPEGD GDEFDIPTALRNKRLMPEDFGGRR\*

>SPBDM4\_v1\_50963|ID:27159326|xerD| Tyrosine recombinase XerD [Uncultured spirochete bdmA 4]  
VSILVRRFQAYLLSTRRRSVLTADV YIREIEMLENFLSRYGKTPLDATGEDLLTYLVNRS  
QSGLQRTTMARIVASLHSFYRFCLSEKLRSDDPSVQIRTPQQRNLPDVLDTESIERVLE  
SIDITTPNGLRDRALFELIYSCGLRISEAAGLTFQQLYLEEKLLRVLGKRRKERLVPFGE  
EAHSWMMRYL TEARPLLEKHGKSDFVFLNQEGRGISRKGIWKRFSQIRAKSGVKAKVHTF  
RHSFATHLLAGGADLRTVQELLGHTDIATTQIYTHIDEASLGMYHKEYFPRK\*

>SPBDM4\_v1\_50964|ID:27159327| protein of unknown function [Uncultured spirochete bdmA 4]  
MKAACVRRVNPCGGSSKMAHEKPHK VRSALIQAE LDRISTALPPLDSFSLPFKLAMQRL  
HFLSWQERILLEQIQSRENFLSLGLAEIESFLYRSVHARLPDMARVWEQAERDAEFLRR  
FGAHFICVTEKEYPPLLRETY SAPFGLFVRGDFRSLCWPPVTVVGTRMPTWTGVRVA VRL  
AKEAADAGLSVVSGLARGVDA AAHRGALQSGVSPTIAVLPCGLDRIYPPSNAPLAAAML D  
AGGCLVTEYPPGVSLDRYRFPERNRILAGFSKLT LVEAPEKSGALITAEALSEGRDVA  
IAAACLGSSRNAGADALAREGACAVHNGDEVV ALLKGAGAWNWFETGSTARCSRRSFEW  
Q\*

>SPBDM4\_v1\_50965|ID:27159328|topA| DNA topoisomerase 1 [Uncultured spirochete bdmA 4]  
MAVAKKKEKNTSGATLAPGVSKPKTLIIVESPAKARTIEKYL GSHFRVLASNGQVIDLPK  
SRMAVDIEHDFEPEYITVRGKADKLKELTEEAKRSSAVVLAADPDREGEAIA YQIGKYLK  
EKIKQTPISRVTFNEITKPAVQEAMSHPRDINMSLVEAQKARRIIDRLVGYTLSPLLWKK  
VKSGLSAGRVQSVALKICDRERDVESFIPEEYWTIEAHLHAHQHAVRAELALLGGEKPS  
IKNEAHAKQIIASLSGKPALVSDIQFADRTVKPKPPFTTSKLQQTAAANRLGFTSTKTMKV  
AQQLYEGVDLGHQRLGLITYMRTDSTRISESALGETHDWLRQYFPAQTPDAPVRYSVSNA  
AQDAHEAIRPTRVDITPDEAARYLKG DHLKLYTLIWERFVASQMKS AVIRTSTADIQIGD  
GLFRTSASSFLEEGFYKIIRLGASKEERTSHQLPF EKGETLHV D KIDGVQHFTQGPSRYT  
DASIVRALEELGIGRPSTYAPT IETLIERYYVQRDKRQLIPTALGKIINDILSQNFPEVI  
NTSFTAKMESMLDKVEEQSV DWVSEIKGFYFPLKGVDDVMHALEDMHGALDEKTDEK\*

>SPBDM4\_v1\_50966|ID:27159329| protein of unknown function [Uncultured spirochete bdmA 4]  
LSCSGFPECTFTKSVPLAKCPKCGGDIIPRVSTRGRKKFYGCSNYPECDFMTLYKPTNA  
TCPQCGWFLVEKYDKKTGVH KACINPDCNYLHSSDESKEDKGGE\*

>SPBDM4\_v1\_50967|ID:27159330|xerC| Tyrosine recombinase XerC [Uncultured spirochete bdmA 4]  
MDARFLDYLDYLGAVRGLSPKTVEVYKRDLAHYEVFLEGKDVDEADASDIRTFAGTLVME



KRAPASVNRTLSAVRGFYRYRLRFHADAKDPAREVENVPAGRPLPSFLFEEETKIFLDGI  
 DGEGFRDVRDRALLEVMYSTGCRVSELCGMQLARLNLADSIRVKGKGSKERLVFLCDSA  
 VQAIKRYLPYRAALMRRLGIEEHNKIFINAKGHPLSTRGAEKIVEKRRLQAGIKKHLTPH  
 TFRHSFATHLVAAGADMVQVQEMLGHSSISTTQVYAHVDMERLRRVYEQAHPHGSKSK\*  
 >SPBDM4\_v1\_50968|ID:27159331|hslV| peptidase component of the HslUV protease [Uncultured spirochete bdmA 4]  
 MEMHATTILAVRKDGHVAMAGDGQVTMNTVLKSNARKIRTIYDQKVLGCFAGATADAFT  
 LFEHFESKVQEYGGDLTRASVELAKDWRTDRILRKLEAMLLVADQTKMFLLSGTGDVVEP  
 SDDAIAIGSGGTYYAAAIAYLDAARRVEEAARAQGTTEPTKLPGYFSAREIAQKSLEIA  
 SSICIFTNDRIVVEEI\*  
 >SPBDM4\_v1\_50969|ID:27159332|hslU| molecular chaperone and ATPase component of HslUV protease [Uncultured  
 spirochete bdmA 4]  
 MMAEDDTLTPHKIVEELDRYIVGQNKAKKAVAIALRNRIRRQRLPAEIREEIAPKNILMI  
 GPTGVGKTEIARRLAKLCGAPFIKVEATKYTEVGYVGRDVESMVRDLMASSVAMVKEEME  
 SQVTEEAKRRAEDRLDILLPGITSSDEPVGESQATVIVPRSGTETKEKFRGLLREGKLD  
 AREIEITVPAQGPQIELFAGSQFEEMNIALGGLQNFLGGKKKKKTVTVAEALPLLEAER  
 ERLVDQEKIVQEARRAQESGIIFIDEMDKIANRDGKGGSSGVDVSREGVQRDMLPIVEGT  
 TVNTKWGPIDTMHVLFIGAGAFNVSKPQDLIPELQGRFPIRVELDALSGDDFVRILTEPK  
 NALVTQYIQLLGTENVQLEFSEEAIARIAEIAAAAANRQSENIGARRLQTVMERLLEDVVSF  
 DADKYADTKVTIDKAYVDEHFKDYVQQQDLSKYIL\*  
 >SPBDM4\_v1\_50970|ID:27159333|whiG| RNA polymerase sigma factor WhiG [Uncultured spirochete bdmA 4]  
 MDYASLEENRLWELYHRTADIHIRDELVMRYAPLVKYVAGKVSRTLPSMVEYSDLVGYGN  
 FGLLDAIEKFDPKKHVKFKTYAVTRIRGAIYDHLRELDWVPRSIRKTKQIERAIASLES  
 HLARPATDDEIAAEMGIDRRELLKIMAKVASSSILSLQEIWPMSSNSEGGTIGDTLESLH  
 TENPDAALEREIIRRVILEALQELPDKEKKVLVLYYYENLTLREIGKILEVTESRVSQHL  
 TKAILRLRAKLSNQRRGIV\*  
 >SPBDM4\_v1\_50971|ID:27159334|atoC| fused response regulator of ato operon, in two-component system with AtoS:  
 response regulator ; sigma54 interaction protein [Uncultured spirochete bdmA 4]  
 MRATLLVVDDETNIAREGLAQLFSMEGYEVRTAKDGEIAKTIVDRDDIDVVITDFKMGRMS  
 GLDLLQYIVSTHPGIPVILTAHGSVDKAVEAMRQGAFDIAKPPNTDHLINLVHRALET  
 RELYRTNIELKAEVESQRARSYIIGQAPSIKRIFDLIRKVAPTRASVLITGESGVGKELV  
 ADAIHNLSRPRKMPFIKVHCAALAESLLESEFGHEKGAFTGAAARKRGRFEMADGGTLF  
 LDEIGEINQNVQIKILRVLQDRNFERVGGEDTLEVDVRLIAATNRDLKKEITEGRFREDL  
 YYRLNVVNIHVPLRERREDIPLLAMAFLEFAEENGKQIEGFDPKARQALYSYDWPGNV  
 RELRNCVESAVVMASGKLVVLDLPPGPRSSAETRVISIPAFSSMEDAERILIAETLALA  
 GGNKSKAAEILKIGRKTLYQKIEQYGIVTQDIDAATSSKKTEVPQDT\*  
 >SPBDM4\_v1\_50972|ID:27159335|PAS/PAC sensor signal transduction histidine kinase [Uncultured spirochete  
 bdmA 4]  
 MKAVYENALKRIDRIPPEGLKQIKNLSAENSIYEALHSTLDGIIVCDLEYKPLFINRS  
 AEKIFRLVSWTQEFALWEQLNDDNLANFFRKALVADETVLNREISLNRHGGTRVISISIS  
 ALVSEGKISGNLIHLEDITDKRRREAQLRRAESLAALTTLAAGVAHEIKNPLASIRIQLG  
 IIRRIEKNRTKKTESIFHNISLVEQEIDRLNSIVVDFLFAVRPMDITLILDRAEEVVQE  
 VVELMSHEAEDQHISIVTKIEPNLPDVMIDRKNLQALLNIVKNAMAAMPDGGVLTISVF  
 VRNDELQIAVSDTGIGIPEELMAKIFEPYFTTKESGTGLGLTITFKIVKEHNGEITVESA  
 PSKGSTFTIHLPLPQPEQKSLPPWEDGVQIEGSHMED\*  
 >SPBDM4\_v1\_50973|ID:27159336| protein of unknown function [Uncultured spirochete bdmA 4]  
 VFENLLFQDRAKEQLTSMIAGEKVPPALLFTGPEGSGKLTAALECARVLSCEKEGLWNCE  
 CGQCNRRHRSLSHPDLLLFGPRNLPQEPSVTAEYFMHSPNLTSYYAFVRSIRKLLKHFDPV  
 LWAGEEARLSKAIASIESLEEQLQEIQTLSRSKIQTLDTIVNRVVETASSLEAFFPDGI  
 PIFMVRNMAAWAVIAPVGKRKTVILQNADTANESTRNAMLKILEEPPETVRFILTSSRA  
 AVIATILSRSLISFEPRTSAQAQHIVSRLFRSQEKVENISEFFHKNSPFPDKAEDEAS  
 LFVGALLDRAMGKDAAMTGDRASNLARRARDQKGSALVLRVAEQTGSFGSKNTKFSNS  
 FFVFMRAVAQQLASIAADPTSSVALIMYVDRLTSKLREMGVQYRSFNRSPELLLEAFVDM  
 FGEYHESSV\*  
 >SPBDM4\_v1\_50974|ID:27159337| putative CvpA family protein [Uncultured spirochete bdmA 4]

MSTIDWVFSALVILLAARCFSRGFVHEVLTVASIAVGLAGLLSNTVIVQILPKVVGAST  
 LPYQVQYIIAFLLCFIVGFILMKIIERMIREGLEAISLDVFDRILGLVLGIAEGFIVVGL  
 FIVILQIQLVDVKSILANSMYVKLLGPIIEPAIGSSLAPILKNENIPNIIQNFKGK\*  
 >SPBDM4\_v1\_50975|ID:27159338|murG| UDP-N-acetylglucosamine--N-acetylmuramyl-(pentapeptide)  
 pyrophosphoryl-undecaprenol N-acetylglucosamine transferase [Uncultured spirochete bdmA 4]  
 MSEKTTAEKNVLDNTSKDMSVARPCIAFTGGGTGGHIYPGLAVIEELRHLGFEGRIAWI  
 GSEKDLDRSIVAEQGVVEYFAIPSGKFRRELSLRNLTDLWRIVAGYVKAKSILKNLRPSLL  
 FSKGGYVSVPPCRASTSLGIPVITHESDTSPGLATRLNSKRASLILTSWEATADYFPEPM  
 RAKIVRTGNPVRPALFLGDRTRGLDMLGFSAEKPVLFVLGGSQGAKEVNDLVLASLPFLC  
 TFVQIVHQTGKANFDEVVSKIPDDPVVRASYRPLSYIGPEIADIYAASSIAGRAGAGTV  
 WEAASLGKPMILPLSGPGTRGDQVENAALAAARAGAAVLEGAQLSPATFADAVKKYLHR  
 ETYDSAVRACYSIAGIPAQTVRALLGDRDLSSEKQMPSAEFARLLLARFEQQAKEGT\*  
 >SPBDM4\_v1\_50976|ID:27159339|pgi| Glucose-6-phosphate isomerase [Uncultured spirochete bdmA 4]  
 MVNFKGLDACDAFASLKKISKIRLHDVLTARIENCWIPHAAELSYCYAFAPVDDLIVDR  
 LQALADEQQLIEKYRMLAEGALMNTGEGRMVLHHLARGRLGAPVIWNGQDMEIFYRDEKL  
 RLYKFAEKVRDGRVRSAGRPFQVQVQIGIGSDLGPRASIALSRWAITRKRKAKLTPWF  
 VSNVDPDDADWVLSHLDLPESLFLVLSKSGTTQETLANEMLVRERLKAAGLDPDRHMVAV  
 TSKTSPLAGNPHYLDSFFIDDFIGGRYSTSSAVGGVIISIA YGPETFEEFLRGAHAADAL  
 ALEPSLKRNPVLMAMTGVYERNVLGWPATAVLPYAEPLSRFPAHLQLDMESNGKSVSR  
 AGQPLSYSTGPPVFGEPGTNGQHSFYQLLHQGTDIVPLQFIGFLKNQLSSDMSSEGSSSR  
 QKLVSNLVAQMMAFALGKEDENPNKAFPGGRPSSLLVGDELGPEQLGALFSHFENKVMFQ  
 GFVWNINSFDQEGVQLGKVLAKKALGAISKGDSSGDVRLDALIAAVYENTRRRDRADR\*  
 >SPBDM4\_v1\_50977|ID:27159340| protein of unknown function [Uncultured spirochete bdmA 4]  
 MEDTGTGMSAVKGPDLVAALARPASGAEPIEVFARERFHVPHLMPLQSFVIANILEN  
 TGYPESAPDEGESGPGTNREMLPCDESHETYNQLVLFPTGFGKSICFQLPALLEGLTLV  
 AYPLLALMNDQKRRLDEAHIPCALFRGGLGEAEWRAQEELISSGKATTVVVNPEILGAPR  
 LRRFLSRFTIAHFVIDEAHCISEWGQTFRPSYTLGESAQALSPRILSAFTATAGPAIVE  
 SIEKTLFLGKGYRLVTAADRPNILYGVVHTLSPTRTLRQLLSCKKPAIIFERSRPGTK  
 IKAGYLK SIGFPESRFYHAGLSRLERKDIETWFQTSQDAVLVSTNAYGMGMDKKNIRTVI  
 HTSLPDSAEA YIQEAGRGRDGKDSLAILIDDLASGSAALGRGSRQEGEQSVQSLRRASF  
 SPYPALGTCRREFLLHLLGEKETPVCGRDCNLEKMQVSQNPATIGDGAGLSAEWRHLSG  
 AEGFLETLLLCRAHQRSWTKAECIRMLGPYGRGKAKFAGLLFGWTSEERKELVQALIELH  
 IIIIIDCGPWKNMISLSEK GKILSRYAQELLVRA\*  
 >SPBDM4\_v1\_50978|ID:27159341|nth| Endonuclease III [Uncultured spirochete bdmA 4]  
 MKKEPSETPGAAQSTALLLEEVHRRLAPIWPDAPHLLHYHGCFELIAVILSAQTTDEQV  
 NMVTEELFDRFPTAGKLAEDIAEVEQIIHPVGGFFHVKARHIIDTAKVLEERFGGKIPPT  
 LEQMLELPGVGRKTANLVASACHEVPGIIVDTHVLRVLLRLGVCPKKDAGLAESIVRVNL  
 SPEKHTQFSYSVNRHGKFTCTARKPACTQEGMSCPLEDICPKIGAKG\*  
 >SPBDM4\_v1\_50979|ID:27159342|argF| Ornithine carbamoyltransferase [Uncultured spirochete bdmA 4]  
 MNPSTLKGRSLLTWIDYTSEEVR YFLDLSKKVKEEAKKGLHKTRFRGKTIALLFEKRSTR  
 TRCAFETA FGEEGHPVFLSNQDIQLGAKESIEDTARVLGRMFS AIEFRGYKQEYVEILA  
 KYSGIPVYNGLTDSYHPTQALADVLTIEENFGNCRGKHLCFVGDGRNNVARSLMVISAKL  
 GMHFTIVSPKELWPDDELKNLCETFAKESGSLLSITDNVEEGVKGADAIYTDVWVSMGEE  
 ALKAERVKMLAPYQVNAGLMEKTGNPGCIFLHCLPAIKGEEVTFDVIIEGPQSKVFDQAEN  
 RKHTIKAIMLATL\*  
 >SPBDM4\_v1\_50980|ID:27159343| DHH superfamily protein, subfamily 1 [Uncultured spirochete bdmA 4]  
 MKPVPKVLLEFIDQHDCFYILGHREPDGDCIGSLSLASMLQGMGKRVHVLSSGPFNRIE  
 ILPFESRFKSEVPAERDFERTAALVLDCSSMSRIGNIAERMPNIPAAFIDHHATGGASGP  
 YDWLDDASAVSAMILVLMETMGHVPTKDEAELLFFGLSTDTGFFRHLDEHGSETFKIAA  
 RLVDVGVSPKRIFMAINGGRTLASRRMLGELLRLVQPYEGRLLVSWVTIDDQK YGMSS  
 RSDLLYQLMMGIVDCEVCFVVKQETDDMCTVGLRSRDSVNVAKIAEQYGGGGHRLAAGL  
 SMNGKVEKVVHTLVEAFSEVFSDEETGK\*  
 >SPBDM4\_v1\_50981|ID:27159344| protein of unknown function [Uncultured spirochete bdmA 4]  
 MDSKNYLDLVRQMYAHPKLYGFFNEDEISDALHHFRGRIEGILDRAEKESRTREAYLLSS

MRFVAKSVHRQNFMSMLCENAYVYSHFSEEVVLGPPADTFIDESPKEESIDAQGMIGLSP  
QIFLRKLTPERKRLLYLVIKCAWDIDEELLKKCSFALGMPEQYLFSLIELAKRKTEGSRK  
QIYELNAKLNTLWIRLRVLELRLETSLLKNEKECIACSLDRCRQRYIRLLEKRKHQKSLV  
SNELISELLGVPKGSVDSGLFYLLKKNVNSGQTLADYRKLKLG\*

>SPBDM4\_v1\_50982|ID:27159345| Non-canonical purine NTP pyrophosphatase [Uncultured spirochete bdmA 4]  
MKLLVATNNLHKLEELKPLFSEHELLRPIDLGIHDFNPEENGRFTFFENAFIKAEALYHLA  
GRPVIADDSGLCVEALHGRPGIESARYGSNNGRLLSAAEKNSLLLSELENMKNRHCVFVC  
CLVLYYGPQRFLCVQETLEGEIGMAPRGRDGRFGYDPIVYLPRKAKTVAELSQEEKNRISH  
RGKAAQKMAAILGITPIEGTV\*

>SPBDM4\_v1\_50983|ID:27159346|rpmE| 50S ribosomal subunit protein L31 [Uncultured spirochete bdmA 4]  
MKKGIHPKYEHTTITCACGNVIETRSTVKNIQVEICSAHPFFTQKQKLVDTAGRIERFN  
KKYGIKPAEEK\*

>SPBDM4\_v1\_50984|ID:27159347|rho| Transcription termination factor Rho [Uncultured spirochete bdmA 4]  
MAVYRRKKSISSTQTEPFNNGNQDSTESKKEETNMNQSQVEEKSSEHNGSLFDGYSEGPVQ  
DTETSIHETHVGTAKSQSHKNRRPVAKIRLKKKATQPAEEENQPSQPAEPEIPETQPP  
NGFVVASLPADDRQHQAFAEASRLELENRAEQRNETRARLSINDLSKMGIVELRELGAKY  
GINHDLITLKKQELIFNTLKAHTEHGGIYA YGSLEILPDGYGFLRSPQNSYLPGTDDI  
YISPSQIRLFNLKTGDTVYQGIRSPKEGERFFAMLRIEQINFDEPSVAQNRVPFENLTPL  
YPTQKLNLETTTEEIstriinLFCPIGKGQRALVVSPPKTGKTILLQKIANAITANHPEV  
YLIVLLIDERPEEVTDMERTVQAEVISSTFDEQATRHVQVAEMVLEKAKRLVEHKRDVVI  
LLDSITRLARAYNQTVPTSGKILSGGVDSNALHKPKRFFGAARNIEQGGSLTIATALID  
TGSRMDEVIFEEFKGTGNMEINLDRRLSDRRTFPFNIKKSGTRKEELLLTEELQKIWV  
LRKVINPMDDIEIIEELLDRMMKTKNNEAFLKSMNTPYQGME\*

>SPBDM4\_v1\_50985|ID:27159348| protein of unknown function [Uncultured spirochete bdmA 4]  
MRRLNFEPPEPYATYIGPAVILNGKLRNLPLDLRCVLHGSLEGTFIRIDHNADIETGMC  
TAQHAVIAGRFTGSMNVADTIVILPNANVLADIKAAANIRIFEGAKFEGDIEITGISPTNY  
VRD\*

>SPBDM4\_v1\_50986|ID:27159349|hup| DNA-binding protein HU [Uncultured spirochete bdmA 4]  
MAEKLTKAELIDALYESLSPSSRTTRKEIHELIDGLFSEIKSAILEGKIVELRGFGTFEV  
KLRKGRSKARNPKTGEIVSVSDHGVATFRPGRELKKAAWEMDTTRIPKSFRKRD\*

>SPBDM4\_v1\_50987|ID:27159350|rpsT| 30S ribosomal protein S20 [Uncultured spirochete bdmA 4]  
LSARNLSAEKRQRQNEKRRLNKSATAIRTAACKVVVASEKKDTAVAKEALREMIKRID  
SAARKGIVKKNTAARKKSRMQKLVNRLS\*

>SPBDM4\_v1\_50988|ID:27159351| 1-acylglycerol-3-phosphate O-acyltransferase [Uncultured spirochete bdmA 4]  
VFNAAIVFLVLSMLFGLFVLLVVKYFFTPKRSRDHLCAEYEQFGTKIIFKLFRVFRGFR  
ITVLNPKKLNIHCLVISNHQSLLDILVLIQLLGIERKPRFVAKKELQYGVPLVSFTLR  
KGGHCLIRRHGAPLETMRAVSKMAQVCMQERTCPVILPEGTRSRNGELGVFHSAGVRKIL  
DVEPIPVAAIAIEGGWRVATVRDFLRRFGKEPYVAEIVKIYDTPRGKHEIEKVLADAHVQ  
IAARIDALRRR\*

>SPBDM4\_v1\_50989|ID:27159352| conserved protein of unknown function [Uncultured spirochete bdmA 4]  
MPDDFHTQAEQDFYRAKTKTLASRIFRMLKPSLSELMFPDQAKQLIRPQSETYRGVTPVL  
LEKIAGSEGRYRDFNRRFFPKKEHLKARWAGIDELQYKDVILPPVILYEMGGVYFVRDGN  
HRVSVARAKGQEFIDAEVISLQSEIHLDPMSIQDIKRAVIKYEKTRFYKETNYPNIVGT  
DDLNFSEPGRYDTIKEHVLVHKYFLNQNMSSEIPFHQALFSWHENVYQPICHAIEAENLL  
SLFSGRTVSDLYLFLVAHWDELKRKFGRFVEIEEAAESFKSQTKRDRIGFFDQVRKIFGC  
NPQKK\*

>SPBDM4\_v1\_50990|ID:27159353| Metallophosphoesterase [Uncultured spirochete bdmA 4]  
MKKPLHILCVADEVDLLVYSAQICERFSDIDLILSAGDIPNEYLEYIVSMLNKPLISVAG  
NHDKSDDPIGRGVLQYNNQRGGLGRIRFSIKKENGIVLGLPGSIRYNDGQNQYSDLWM  
TFRIIRMLPRLLARLLFGRSVDIILAHAPPRGIHDGGDPAHIGFSA YRWLIRLAKPYYF  
IHGHVHL YDLQALREMNYFDTTVVNVYGHRVITLPKEDDNAR\*

>SPBDM4\_v1\_50991|ID:27159354| putative DNA mismatch repair protein MutL [Uncultured spirochete bdmA 4]  
MMGKIRILPPETSRRIAAGEVIDRPASALRELLDNAIDADAHDISVSITQGGIEEITVSD  
DGYGMSREDLALSIKEHATSKIYAPDDILRARTLGRGEALASIAAVARLEIASRPRGLD

EGWRLMSSPLQEPTVEPFCKEGARITVRGLFESYPARKQFLKRPQSEAFLCRTTFVERA  
LSPHDITFRWKSSNDLDVIMPSPQRERIVHCYPELSHIHMFDTSSKMDDMQVHLVYADIS  
SYRRDRKFLQIFVNRVVPEWGLINLMEYEFYKYLPGGAHAIAFLFLEIEPSLADFNHHP  
AKKEVRLKNPAQVRTSVHALLSNELNARYKGATQALETNFPAPFGEIAFTSEETAFFSPKFD  
ESQPFTVEEKPGKWVNGAAFGKSSQNANMHQSGPPLPADFWQKVKQGQLSYPRYIGKGGP  
PFLFELGDTLFLDQHAHERILYDRIKSKKGESQSLVPYVLEPHENEHYLKESEQNL  
DYIGYRIKKEADTWIVEAVPAIAAAQALEALVEWLSRPSSDATPIDAIAANLSCAAIKD  
GDMLDQPSAERLIAEALALPEPRCPHGRPIFLAIPKEKLYAMFGRIIE\*

>SPBDM4\_v1\_50992|ID:27159355| conserved exported protein of unknown function [Uncultured spirochete bdmA 4]  
VKKVLLLLALLVVVLPVFAQDNRTGFNFAAGLGTDLLPNPSDATKMESWSKLALQPEFS  
MGKFGIGLDMVRFKLATSGTAAFELYEPDWVPQNGQSIFDVYLPKILYIRYGYQWEDPF  
YIKMGSISDFTLGNGLIVDNYSNMRFLPQRRIFGMQLGIDGSLFGFPYVBLEALTGNVTK  
LDVIGGRFYVRPLAFFGKGLLGLKQIGAIAYDRDPYLYVDDATYGTYESAGSPPSEAT  
YVVGADITLPVIQSNAFSLTTFVEGAREKNKSMGAITGIRGKVLRIVSYGAQFRYFQEGF  
IPSYFDANYDLYRADRFVYTETTAAGTDFNPSWLASLGFDFLKSTLSFKATLDAPFGALP  
SAPGTDNPAEYPHMLGTLGLARGLIPNVGIAARYEKFFLGKKSNNVFSDLADLTASIGM  
TVSYKAGSAVVAMDYAYSWNPTKDDFDVSSLSVGFEL\*

>SPBDM4\_v1\_50993|ID:27159356| Orotidine 5'-phosphate decarboxylase [Uncultured spirochete bdmA 4]  
MEVHGRAGCAQLALDRNLRRIEATSPYAAAFKPNIAFYEALGEPGMATLRKTLSSIPDDI  
PIIIDAARGDISNTAEAYAQALFGELGADAVTLSPYMGDLTLPFLKWEKGVFVLCRTS  
NPGAGFLQDIMVDGSFLYLALAKQCGALPKEVGLVAGNDLEALRKVRQAAPSAWFLSPG  
IGAQQGQADRAFALGARS DGKLLVAVARAIADASEPSGAARELRDVMRKARDIHLTAEK  
ASQGDMESEGLAVLKHDFVHALLSTGCFRLGEFMLKSGKKSFPYIDLRLVADPDAMKIA  
GRAYAFLASKCTYDSIAGIPAAGLPLATAASLEIGKPMIWRMPAKEHGTGNRIEGSYVA  
GECALLDDDLITGASKLEAIEILRSEGLQVHDDVVLIERGNEGRLDMEGAGVRLHAFIH  
VLELFDVLKQSGKIDEQQYQTLVEFTKNT\*

>SPBDM4\_v1\_50994|ID:27159357| Transcriptional regulator, BadM/Rrf2 family [Uncultured spirochete bdmA 4]  
MRMTTRGLYALKATLTLAELSTEQKRVS LQRIAQIEGLSPEFLQQIFYKLRKAGIVKA  
FRGPGGGFSLNKKPEEISAYDILFAVGETLEIVPCAFERNEKKPCPKYECCDAGNFWMG  
MERIVMEYAKSRHLSDIQQGMNR\*

>SPBDM4\_v1\_50995|ID:27159358| protein of unknown function [Uncultured spirochete bdmA 4]  
MQPYRIQLVDLTSGDTYLAAQRPKDRKDIPDFDCPESFAHIRENCIRSLDQTTQEIKIQT  
AQSKTLYIIDETGPLGHERNKGHLEFLKVVLDLADALVLTVRADLQGVLLSILKKHDI  
PTADIHLLEIDKQFSMDAQAASFFIETI\*

>SPBDM4\_v1\_50996|ID:27159359|rex| Redox-sensing transcriptional repressor Rex [Uncultured spirochete bdmA 4]  
MKLNYAPSIRRLPSYLHIIRAFQRTGEPYISGTWIANELNLEPIQVRKDLAITGIVGKPK  
KGYPVEQLIAAIEHYLAWDVEQKAMIVGAGNLGSALIGYQEFRNHGLHIVAAFDNDLSKV  
GHSIHQIQVYGMEELKEVIEKKNITLAILTVPSPYAQSSCAIVTAGIRAIWNFTNVK  
LKVPELVQREDLSSGYAILSVMRTRAKAMS\*

>SPBDM4\_v1\_50997|ID:27159360| protein of unknown function [Uncultured spirochete bdmA 4]  
MSSLLKLMRILEWADWEAPPAEMNCEMPFKTIISTIADLVPDIASAEPLNSLAPQQALR  
LLNKTIRFYVLIPSIVNVLLNYKICVEHGLPLHPTVYELKEARKYRISHSLGEIQRANE  
LYWKSIDVARECCRFAPHATQDLSLLSEAPPSVSSFVYTA VQDPYTWLGSKPSLLSTLA  
EKIKKSYQPCLLLAAAHGSIMPALVSELDDIPLYFIRFSMFKRHDEEPIVSLSDHAWLF  
DFRGKNVLLYDEDVAGGRTLELFLKRLSPLFGQVKTACSIRHAGSSLHPDFFGRMWWD\*

>SPBDM4\_v1\_50998|ID:27159361| protein of unknown function [Uncultured spirochete bdmA 4]  
MSQRHDIVHEAEISAFCDPEFVFLNINDPASFETAPGKAARHGLFRNAQV\*

>SPBDM4\_v1\_50999|ID:27159362|tatA| Sec-independent protein translocase protein TatA [Uncultured spirochete bdmA 4]  
MFGRIGPMELILILVIALIIFGPKKLPEIGKAIGDAFKAFKKTQEDVTKEADKIVSDASA  
KSGEPKEMAQKDADADKGEAAKS\*

>SPBDM4\_v1\_51000|ID:27159363|tatC| Sec-independent protein translocase protein TatC [Uncultured spirochete bdmA 4]  
MTYIEHLTELKRLILVFLVFLGFSILCFGWSKQLATFLVSPVQPVFVFLSPPDLFMTY

LSLSLYAGFVLSLPVILYEIGMFIWPGLEKKERKAIFLSLLL GALLFIAGVAFGFFIMLP  
YMLKFFLGFTEGIKPMISIRDYLNFGVQIVLSFGIAFELPVVTTALAGLGVINAAQLKS  
ARKIAVLVIFIVAAILTPPDVVSQLLLALPLLVLFEVSIVLASFVEKKS KAKVQEAT\*  
>SPBDM4\_v1\_51001|ID:27159364| Glutamate formiminotransferase [Uncultured spirochete bdmA 4]  
MDKPLVECVPNFSEGRDHAKIEAIANAIRSVPEVSLLDVDPGSDTNRTVYTFVGAPEAVK  
QAALEAARMAHAIIDMRAHHGAHPRIGALDVC PFVPVSGISMEGCAQLAKDFAAQLAEF  
RVPVFLYEKSASRPERQSLADIRAGEYEGLADKLADPAWQPDYGPARDARWGATVTGAR  
EFLIAYNVNLT KDKKLAHDIALSIREAGRSIKDAEGNTTRVPGRRLRAVRAIGWYIETYQ  
CAQVSINLLDFHETPLYAVFEAVKEEA EARGLYVTGSELIGLIPLEAIRACGQY YRRKMG  
RSPALADRELVDLAARTLGLRSVQPFESDKKIEWAIGRAGSLVSMDVCSFVDTVSSDSP  
APGGGSVAALAGALGAALGAMDANLTVGKKGYEAAAESLSVLGIKAQGLKRALLDIVDED  
TEVFNAVMEALRLPKCSDEEKIARNA AIEEA EKNAARVPLKTAELCLETMKLCADTAKSG  
NANSVTDAATGCNMA YAGVLSAILNVRINVQTLIDEQFKTAMRHDCEVLEDQAAIVRQEM  
DKTISDIFRD\*

>SPBDM4\_v1\_51002|ID:27159365|potA| polyamine transporter subunit ; ATP-binding component of ABC superfamily  
[Uncultured spirochete bdmA 4]  
MKGADV DILGVSKFFGSFQALNNINLSISKGEFFSLLGSPGCGKTTVLRLLIGGFEDPDSG  
SIAIEGKNV VGLPPDKRHCNTVFQSYALFPHLNVFENVAFPLRIRKVPQQLVREKVIHYL  
ALVQLETHALKKPSQLSGGQRQRVAIARALINEPSILLLDEPLSALDAKLRQHMLMELDA  
IHDKVGITFIYVTHDQQEALSVDRIA VMNMGEVLQIGTQRQIYENPATEFVARFIGETN  
VFNLKIISIDGTRIYGETEGLGPM SVEDETEANPGERVLA TIRPEKIRISTDIPNTNGGH  
INILHG YVAEPIYS GFQTKYV VQLDTGMMVTVYRQHANWSE GIPDIEWKDEVYLSFSAAD  
MVIVEMHKQ\*

>SPBDM4\_v1\_51003|ID:27159366| ABC-type transporter, integral membrane subunit [Uncultured spirochete bdmA 4]  
MKKQVGLLYSLPQILWLLVFFAAPLCIIIVYSFLKKGLYGGVEPQFSLEAYTALANPNIL  
LVTWRTLKISIIATALLIALPCGYSIARSKNQAARLFLVIVPFWTNFLVRIYAWIAIL  
GNEGFLNDILRALHLLTTESVQFLYNQTAVILVLVYMYLPYAILPLFSTIDKDFDFTLLDAA  
RDLGASRFQSYVRVLLPNIKSGLMTAGLFTFVPIFGAYAVPLLIGGKDSYMLGNIIADQL  
TKTRNWPLASSISMTVTILTTGLVFLIAMRKPREQKQVFDADPAFLQAVPAGKR\*

>SPBDM4\_v1\_51004|ID:27159367|potC| polyamine transporter subunit ; membrane component of ABC superfamily  
[Uncultured spirochete bdmA 4]  
MLRKG GIIAARKFMPAGSSLSNVIIYWV VIGFLFLPLFVLVLYSFNSGRQTTWQGFSFVWYQ  
KLVMASPELWRAFFNSITIAFGSALMSTAIGTLAAVGTTRY SFKLKNLVSTMSFVPMILP  
EIVVGV SLLIFFAGVGLRLGLLTVWIAHTTFNL PFVYLLVSARLEESDPSIVEAARDLGA  
NEMQILFRILPMALPGILSAFLTAVTLSLEDFVITFFVTGPGGTTLPLYIYSMIRFGVS  
PVINALSVMVAGTVLLVYPMRNLKVF AAR\*

>SPBDM4\_v1\_51005|ID:27159368| Extracellular solute-binding protein family 1 [Uncultured spirochete bdmA 4]  
MVKLRKVLNLSAFALICTLLVLSGCGGGGQSKTLYIFNWTYYTPDSVIQKFEKEYDVKV  
VYDTFASNEEMFAKLKAGGAN YDIIFPSGDYVSIMIKEGMLEKIDKSKLKNFANIDPQVL  
ELCDFDPGNQYSVPYYMGAAGVA VNKTKVQTYDRSWSIFARKDLGNHMIMLDDMREVMGD  
ALKYLGYSVNTTDQKQIDEARDL INNVWKP NLLKFDAAEFAKSFASGEVWVAQGYAESIF  
AEVDKANWNTVDF FIPKEG GPSYVDSMVILKGSKNKDLALKFIDFIHRPEIYA EFCDYFG  
FPATANV PARALKKGESWYRPEDLLNCELKEDVGADLEKYNAAWQTIRVGK\*

>SPBDM4\_v1\_51006|ID:27159369| Rhodanese-like protein [Uncultured spirochete bdmA 4]  
MALNPIEELINNGAVVVDVRTEEEFGE EHYPN AICVPVNEIMQRADEIGQKDKPVVLYCA  
SGARSAYAARILKSLGFAKVVNAGGLYDMPNY\*

>SPBDM4\_v1\_51007|ID:27159370| CoA-disulfide reductase [Uncultured spirochete bdmA 4]  
MKLVIIGGVAAGATAAARARRIDEKAKITILEKGPYVSFANCGLPYRISGDIQKRGRLLIL  
QTAEGFFARYRVDVMLNTEAIGIDRQNKQVRVKSKDGESVVPYDKLILAQGGTPIRPQID  
GLDSPNVFNLWTIPDTDKIEAFIKEYDPKSAIVVGGGFIGLEAAEAFNNRGISTTIVELM  
NQVMPPADPEFGAQIAEALAEHGVQAITGKS VVRIDWNARRATLSDDSTVSADMVLLAVG  
VRPNLELAKQAGLATGSANGLVVDEYLRTNDPDIYAAGDMVEVVRVPDGTKVRIPLAGPA  
NRQGRLAATNALGGSMKYAGAMGTSVVKVMDYTFSMTGLSEKAAKAAANIDVRAVTIHKAH  
HATYYPGSEDL SKIIYQKSDGKVLGAQAFGKEGVEKRIDVLAVAVHAGLSLEDIAELDL

AYAPPYSSANDPMQMASFAALNDMHGFSKFVTAQEAMQPIRQGTATILDVRTYAEYLNH  
IKGSVHIPLDELDRDRIEVPSEQILIVSKAGFEGHLAYRQLIQNAKNDIRYISGGYTSR  
LLQEAQNIIEEGE\*

>SPBDM4\_v1\_51008|ID:27159371| Aminotransferase, class I/II [Uncultured spirochete bdmA 4]  
MLRYNNMHDFFSKRSEAGEAAPNVLALIREQFSGEQRPLKDLSSQSNPTKVGLSHAPELF  
SLKNPENAVYTPEPKGLFHSRAALSEHLAREQRKISPENIFLCASTSEGYAWLFLKLLCDA  
GDIVLIPKPGYPLFEHLAALAHVVRTMAYPLEYAHSSGWHIEVAEMESMLASEYGGRIKAL  
IVINPNNPTGSYIRKGERSAILRLCERYGMALIADEVFFDFPLDDAAERESFIGEERVLT  
FVLDGLSKRLGMPQMKLGWIAVSGPPQEALRAKKRLELIADTFLSAGTPIMNALPSLFAQ  
ESAFLQELLTRIRENYLIYRTILEQQGSPHRVLACQGGWTALIESPAFFEEEEKIAGLLLQ  
QKGISAQPGFFDMERGVHFAFSLIIPQEWATSWCREYKEFFDALQTQ\*

>SPBDM4\_v1\_51009|ID:27159372|foID| bifunctional 5,10-methylene-tetrahydrofolate dehydrogenase and 5,10-  
methylene-tetrahydrofolate cyclohydrolase [Uncultured spirochete bdmA 4]  
MSAILIDGKKIAEDIRSELAEKVASLCEKGVPRGLAVILVGDNPASVSYSVTGKEKACAEI  
GIQSFETRFEPDVAEKVLEKIAECNRDSNVHGILVQLPLPRHIDERRVISAIDPAKDVD  
GFTPVNLRMLLEPCYIPCTPRGIIELLKRSGVPTNGAHA VVVGRSNIVGKPLENLLIR  
KSVNATVTICHTGTKNLAHVKEADIVACAGKPGLVSVDMIKPGACVIDVGVNRPDST  
KKKGYRLCGDVFDDDDSKVAGWITPVPGGVPMTIAMLLSNTIDAASRLSDIQW\*

>SPBDM4\_v1\_51010|ID:27159373|foIE| GTP cyclohydrolase FoIE2 [Uncultured spirochete bdmA 4]  
MVDVQSFQDDRHIAIQKVGKGLRYPITLLDRSEKYQHHTALVNLYADLPHEFKGTHMSR  
FIEVFEEYRQDLSMPNVLRLMLKKIRIELDAQTA YTDIHFPYFIKKAAPVSGQTAIMS YDC  
FYEASSEKGRFIAGVTVPVQTVCPCKAISDGGAHNQRGVVTLQVSLGPFWFEDLIR  
IVEESGSSELFTLLKREDEKFITEKAYGQPRFVEDVVREVYSKVDALHRFPWFSVEAENY  
ESIHNHSAYAYVEKSERSKIEPVNGDYGKFDTLGPM\*

>SPBDM4\_v1\_51011|ID:27159374| membrane protein of unknown function [Uncultured spirochete bdmA 4]  
MESNYPVDPKNLSDKGTGVMSTAAGIGMLGVNALLGVPVVGTVISAGLLALGAIGLFGK  
TKTDKASGTVLAAAGIAGIATLFVPGVAHSLLSLGGIGLLGYGVFNLFGLKGLHRKK\*

>SPBDM4\_v1\_51012|ID:27159375|miaB| (Dimethylallyl)adenosine tRNA methylthiotransferase MiaB [Uncultured  
spirochete bdmA 4]

MKKYHIETYGCEMNKAESAAMEATLREHG WERSPEEDAQLVLLNTCTVRTTAENRAWNRI  
HQLSARKKERGFVLA VVGCM AEQHKGAIQKKAPGV D YVLGTFQKQSFGLMLDIISKGQRI  
EVLEETPTYVFDASHHEPGA FR SFVPIMHG C NNFC SYCIVPYVRGREVSRKPADILHEID  
QLEDLGVREITLLGQNVNSYRWEADGQVLNFPGLLRMIAGHLDNRHAIARGAPADPRQFG  
GRIGWIRFLTSHPKDLSELVEAIVDNPIFCRQIHLPFQSGSNAVLAAMNRKYTREEYIC  
LVEKLRKEMPELTLSTDILVGFPGETEEDLDETL DLMRRVRFSYAFMYHFNTREGTPAAR  
MPNKTPDKVKKQRLARVIALQKEITASLMEERIGQTDEVLIEDISKRSSKEVLARTTRDE  
MVVFAASQKRIGHFARVRLLSVAGNTFRGEEV\*

>SPBDM4\_v1\_51013|ID:27159376| exported protein of unknown function [Uncultured spirochete bdmA 4]  
VNSTRREKLKGPVRFSGIAFLVVSLLMGMPAPSAWGQTYKNLAQARQAATGAKSQDALKT  
VLLSALPQLSVRDGIMLCEEYESKVGTA FRAELRSTVGGLYLLLGQTEDAAMWYTKAASL  
DSKYVMEALRLSIAVGDQKSTLQLLKNEALSEESRAMLDVWLSLYDNDYASASAKAKDAL  
ARVSDQQVRRELLFLQYIADFGQFGTSHSSLTKDFPSSIESDLVTGKVFPSWVFLSLGL  
SWLGT PALLDFPKKNLPNEENKNNTVTQWLQVGYFSSKD NAERLSKTLTAKNFQTRIVE  
LKNENGDLRWAVHVA AKEDWQKTQSTLKDQGYESYLIGP\*

>SPBDM4\_v1\_51014|ID:27159377| exported protein of unknown function [Uncultured spirochete bdmA 4]  
MLKRTYIAAFLVASAFAAWLVALQRQENLQAAVPIENRTVMLEVP SGKNEVPSQNTIQQR  
AKITPLPGEIFLKTIDVNLDDDED FEQVILSKKSTASTSLEIVVADFSQALGVYFRHFEG  
PIAATKLD SIIIQPM DVTADGLSDLLVQGLDASNDQTLTIFRRLSDRGYVRVFSGAGSEV  
TLQDPD NSGGASAASIVVQTPSDSPGMVVQTAYTWNRLSSFEKKSETSVRQNNAFALGS  
GGTDAQVFLSWLNRLWTRNTDASDPRSLFLDVKNNALIFGDQIQQRWIKSAERNENRL  
YLTCSTSEASDLDRVVVIDAKAQDEIAVGIIDQQVSHFRRDEGWSGTYSGVAPVAALPQS  
IMRSEPNFDIFFGRYLGNDSDVLVLGPSKSIIVIDK KYREGIAKFYDYHGYQVLDLFLQIK  
PNGLAGERLLFVVS AEQSGDGAIRRVRL EPAQVGP DGVRIDYRPPYEFTKTS\*

>SPBDM4\_v1\_51015|ID:27159378|rocD| Ornithine aminotransferase [Uncultured spirochete bdmA 4]

MNSRDYIALDNRYGAHNYHPIPVVISKARGCKVWDPEGREYDFLSAYSAVNQGHLPHI  
VEAARAQLERVTLTSRAFHNDKMGPFLLQKLCEYTGYEKALPMNTGVEAVETALKAARRWG  
VEKKGVENGGKQSIICATGNFHGRTLTAVSMSNDPESFINYGPYVPGFIKVSFGDATAVRS  
ALEKNTVAVLVEPIQGEAGVVVPEGYLTELKIKCSDAGILLIFDEIQTGFCRTGRRFAW  
HYESARPDIMCLGKALGGGIMPISAIIVADHEVMDVFTPGTHGSTFGGNPLAGAVGVAAIE  
VLEQEHLEENAFRLGERFRQAIGTVESARIRLVRGKGLLNAVVFEEKFDAIPTCLALKEK  
GILAKQTHGNIVRFAPPLVISAEELEDALERIMSVLGNV\*

>SPBDM4\_v1\_51016|ID:27159379|ddl| D-alanine--D-alanine ligase [Uncultured spirochete bdmA 4]  
MKTIAVLVYGGKSGEHEVSLISASSIVAHLDKAKYSIVPIGITKKGEWYLQHLPEWAYTTP  
EQGLMRSLEVENAERVVAVPGDGLWLETENCLQNLNIDIVFPVLHGTFGEDGTVOGLLE  
TASLPYVGADVLGSAVGMDKEISKRLWLSAGLPVVDYISVNKEDIAEENFQALVRKIETR  
FGWPCFIKPACSGSSVGTSKVNHPDALKAAILSALRWSEALLEAFVEAREIECAVLGND  
KPVAFPPGEVVPSEHYFYDYEAKEYKDPNGALLIPAPLSEETKNRIMSLALSAYKYASIKG  
MARVDFVFEKITGSVFLNEINTIPGFTAISMYPQMCTSGGLQYDLDLKLIGLGLDQYAT  
RRALEYDFSKV\*

>SPBDM4\_v1\_51017|ID:27159380|murE| UDP-N-acetylmuramyl-tripeptide synthetase [Uncultured spirochete bdmA 4]  
MSKRLSDIISGLDFLDIQGNIQSVSGLSYDSRECKPGYLFFALPGIHTDGKQYIRRAVQ  
HGAIGVVYEGSLDQGAGEPSPWTGAKTRSENIAFLRVADCRWAMSAISGKFYDDPSDSL  
VIGVTGTEGKSTTVSLIYQLLQFAGYRAGFFSTVTSDTGDGERPNSQHQTTPESTA  
VQEM LAKMRDCGLSFAVVEASSHGLSPRTARLAHVHFDIGLVTNVTHEHLEFHGTWEQYRSDKA  
NLFRRLLGEAGPKRLACTNACIPLGIICADDPSAAYFAGESAAPCLTYSSKGNLADLCARD  
IEGDPEGSNFTIEGPGTVQAQGAAPHAEEARGAEGNVSRHALPARLNLPGTFNQNLVGA  
ILAASAATGLHWSRLVPYLPKLRPVKGRMQRISEGQPFVVIDYAHTPSSFKEILPLRR  
ERKGGKILCVFGSGGERDRAKRPQQGRIAADNCDIVILADEDPRESDPMALLEEIAAGCPE  
LPREERLFLIPDRPAAIRKAFSLAKTGDLVLLLGGKHENSIIYADHSIPYDEETTARSIL  
ADIGFGAEGKGGK\*

>SPBDM4\_v1\_51018|ID:27159381| 6-carboxy-5,6,7,8-tetrahydropterin synthase (fragment) [Uncultured spirochete bdmA 4]  
VWVSGKELGEGGMLVDFSIVKAALKKLIDEALDHRDLNGLPEFEDDPSAERIAKFIYDRL  
RGVLPEVPLSAVDVFETDTSMARYVPDSVERF\*

>SPBDM4\_v1\_51019|ID:27159382| putative Radical SAM domain protein [Uncultured spirochete bdmA 4]  
MMREGRIVTRAVAADMANPRFEDARCRILIVRLSPYRDIEVSYSHLVLFDESRRALPDAF  
IDFAFLPPLQDRKTLTALSRPWFFGRASGKSPAEFDIILISCAFTLELINLPWLHSQSGI  
SPSRGERLRAPTVP LLFLGGSSTVTAGSLLKMEKDEVLESVDAFFFGEGERVQDIVQL  
ASNGLQGGAPKSTILTEIASEVEGFWPCASQFTAMRALSQRPLPLVSPLVLNGENAGHT  
KLAITAGCSGHCAFCEGWDRRPYREKSLQELSEAALALKRATGASDVELFSYNFMHHE  
ILDLIPTMGRYFFRVSLMSQRLDILAKNPELLSAEFAAGKRSFTLGIEGISERLRQYYYK  
GISGAQIWSAVSSILKQKARELKLFFIISGFENDADLNELGAFCEGEMARFRDEMHSSTRI  
IVSAGYL VRLPFTPLQFAPLSHDRAVLERIVSRFEALCAENNLEFRLASSFEDYVVDQLL  
SIAGPLAHDWLSACPEHGFVYDVHVPRAAKSLDECLIKTSDFSMLLEEKPGDYRPFCSF  
VESESHWNLLRAHYERSVKYLHEQTKLNTLQRQKSDLEGEAPVRPPAQFSKEADARRALA  
LIAAQEESKAHFPHIFVKVSEDDALAFSTEAYECAWLVRTLSALVPNAERALFNCRQVLP  
HDQWTNVFPNATAPHFGLSGEKFFALYGPDVAILEKIVAHASKHSVSGSPALLESIEQAN  
MPPITETCMLLCTISGMSGGRLASILRSWLDTQNLHFTLNSTENGHEFHISKSSSSKKS  
VLFVQYHTYSSNIELRVRVVGKRANMQTFADLLHKEFPNEEILFRIEGWA\*

>SPBDM4\_v1\_51020|ID:27159383| putative DNA/RNA helicase, superfamily II [Uncultured spirochete bdmA 4]  
MNDFLSLGLDERLGLALHDLNLGTPTEVQKQAIPIILLQKKDLAMQSETGTGKTLAYLLPI  
FQALLASKPRPSETHWPKALIVCPTQELAVQVARQTALLAQAASLNKLNALLGGTHFSH  
QKEALKAHDPDIIAGTPGRLADLTNMRFIDLSRLEFFVLDEADRLFSKEYLEPVEFLLSKA  
PQNCVHIMASATIPEKTLRKAEPWMPSPSILELGSEGILSDAIEHWVFYAEHRKKVDMLK  
KIIGAARPKRCLIFASETYRVQRITERLASSGLKCTSIVSRMEKQSRYSIAIEHFRQGSVP  
FLVTTDLAARGLDIPDITHVISLDLPEESNAYVHRAGRTGRAGKRGISILIADRIELERA  
SRTAVRFGFVFRTRKLEYGHVIEPTVEEFLEHIEKMDADGNSRAHS\*

>SPBDM4\_v1\_51021|ID:27159384|rnz| Ribonuclease Z [Uncultured spirochete bdmA 4]  
MNLEAFVLGSGGMMPLPYRQLTSM LVRREGELFLFDAGEGTQVSIRRLNLRWKKITAFI  
SHMHADHVTGLPGILMLSSQVDREEPLYIFGPPKLADYIDQNRRLD MYINYDIIVQEIS  
ERTVVWNGDGYSIRAFPLRHTKMCFGYSLEEAPRPGVFYPEKALSMGVPRGPLWSELQSG  
KTVTLPGGREVHSSDVMGEPGRSGRKFVFTDSL YFPEISQEVSDSDLFICEGMFEQGLIE  
SAIDKRHMTARQAAQIARDAGNVKRLGLIHYSR YADRELKVLLDEAREVFPNTVLTKDR  
MCFPVFEFVD\*

>SPBDM4\_v1\_51022|ID:27159385| membrane protein of unknown function [Uncultured spirochete bdmA 4]  
MKRTLRIILFIGTLVLI AALVGFVALKIGEFRLS GEQSASAEYAILRNAVSPITSEQEFG  
DQFVRDR LKSLYSASAHL LAVQVLD RNLVLWKIPDDSPYFASPATSPGSVFHAPGMSTV  
IYMTPLPDGMKLMALYSILSQKDIANILLVPII LAAWIILLVILQIVFKGKPV EAKTE  
PVP AKTVEPPMAEEIETQPEEPSGHEEQKTAGHIEGNAEENIEGNIGENVGEAAPEEAS  
MEAAELDEEIEEILQEEELPPEEAPFAA VPAPENPEL KPGAEAVIPSQPEMPPEKEVLPV  
REEPPQRKIISEETSPA ESEYDFEEAEFVAPPEKTEETPEPEAFPSLSLDMLKRTLETE  
LQRSQETSLLLIQCMFSGESDPSALALGVTIRDYFAESL VFELAKGCYAAVLP GVDAGS  
GLKLAVDLDDVLT TTTASLYKDLSEPPFYFGISALYDR TISPERLYKEAL AALQKAHESG  
SRILAFKPASPTA\*

>SPBDM4\_v1\_51023|ID:27159386| conserved protein of unknown function [Uncultured spirochete bdmA 4]  
MSMDLKKRKRYPAGWYPD NAAEIRSLVSDWTKLQNNLSAFAIVAPHAGWYFSGDLAAKA  
VWSLRDCDTVAILGGHLRRGDPILFAEEENFDCTVRDAANDAQVLNALNSELKDAGIQEI  
APDHDIDNSVEIMLPLAALRFPEARLVWLRVPPDYKARELGSALARA AASTCRKKLAVIAS  
TDLTHYGPNYGFMPHG VGESAVDWVRNENDRGINAVLSMDTDKVLGHARDRFSACSSGA  
VAA AISFSLNNGAKRGVLIGHKLSFDMHPDRSFVGYAAIAFVP\*

>SPBDM4\_v1\_51024|ID:27159387|murD| UDP-N-acetylmuramoylalanine--D-glutamate ligase [Uncultured spirochete bdmA 4]  
MSIIDAIDEFRGGRITVMGLGLHG GGIASARFFAKAGAEVTVTDLRGPEVLEPAIRQLEA  
FHIHYVLGVHHEEDFAKADIVIKNPA VRRDSPFLRLAKRIETDISIFLRYSESPLIAVTG  
SKGKSTVASAIWYVLSQYHEKALLGGNISVSPLDFLDETGPDPV PVVLELSSWQLGDLHNM  
GILKPKVAVLTTIFPDHLNYYDSMEAYVADKRVIYEGQDEH CYTICSADQDWGRSFARET  
RAQVLWYSEKPLAELAE GDSQGGWLAKDDSAQALAGSSPGFFSGPESFSGFGKFSQHGI  
ELLPHQVFVPLGHQKKNLLAAGVALRAFGVPSDIALSLGNFPGVPHRLEFVAQVRGIR  
WYNDSTATIPDAAIAAIESFSSPIVLIAGGSDKMSDFSAFIQKAKKMKAIILLAGSGTER  
IIPLLNENHIA YEGPYHSMRDAVDAANKAAEEGDV VLLSPGCASFGLFLHEFERGDAFKN  
EVARLAAPTID\*

>SPBDM4\_v1\_51025|ID:27159388| Pyruvate/2-oxoglutarate dehydrogenase complex, dihydrolipoamide dehydrogenase component [Uncultured spirochete bdmA 4]  
MSRIEQHPILSVPKDRPCITFHFDGEEIPGFEGEPV ASALIAAGHPVFSHHHG DGAAQGL  
FCANGQCSQCTMLIDGVPKKSCMTPVAQGM DVRTLRLGLPKLPAQDEPLVQAERRSIRTDI  
FIIGAGPAGLAAA AELGTMGYQVLVADDKPRAGGKLV LQTHKFFGSESDCYAGTRGIDIA  
RLLQDEATRHP SVTVL TNAPVVGLYKDRKAGIFL NYESYLLVEFTALVVAAGAREKALQF  
PGWDLPGVIGAGAFQTLVNRDLVKACRKIL IIGSGNVGLIAAYHALQAGISVAGIFE AAG  
RISGYQVHADKIRRMGVPIFLNTILKAEGA EKVERAHIAAVDEK FQPVPGTTRVYEIDA  
VLIAVGLSPCNEFLEQARRYGIMAVAAGDASEIAEASSAIYGGKTA AVNLARMLGKKIAI  
DPEWEKTRQV LASRPGDSYERSPIPRLEWRPVFFCSEEIPCNPCATVCPVNAIRLKPLR  
GTIMDLPYFAGNRCTGCGVCVAICPGLAITL VRR IADDKAQIVLPWEFNVD FEIGAEMDL  
VDQKGGFVERAAIISRRKVSSRNTWLLTFNVN VESASRIAGIRVQPGEVAASLRGNDAR  
VAESTDVLDTVLCRCERVTLGEIVEFIKKHNVRDTNQLKSLRVGMGACGGKTC SQLVAKA  
FALAGIDPADVEPPTQRPLFMEVPMGSLVNEGLHKLGGKDAGARGAP\*

>SPBDM4\_v1\_51026|ID:27159389| putative oxidoreductase [Uncultured spirochete bdmA 4]  
MKHFDVVVVGAGSVGLPLSWQLAEKGLNVA VVDEEASWGRGQNRAAIGGVRATHSDAAKI  
RICLESIEIFSTLQSQYGFV EWRPGGYLYVAYDAETESQFRS LLEKQKVAGLNIDWVNP  
DTIGRMAPGILMDDL RGGTFSPNDGYASPLMAGSAFHSLALEAGVSFFFNSRIERIRREG  
NRVASISVGDEEFAAGL FVNAAGAKAADI AKVAGFDIPVFPDCHEAGVTEPVERFLEPMI  
VDIRSDAESGNYYFYQASTGQIVFCITPRPQVWGRDKDSTSTFLPLAVRRMLELYPRLRN



LRVRRRTWRGMYPMTDPDGLPIIGYPDSAVNFLQMTGMCGQGFMMPGLGRIIARTILAGGC  
HEKPAGATEYGFVFEELSINRNFHVELLK\*

>SPBDM4\_v1\_51027|ID:27159390| Rrf2 family protein [Uncultured spirochete bdmA 4]  
MFQVPTKTQYAIRALVHLVRTKSASVASIAEAEHIPFKYLEAIFGQLKSAGLLIADRGRS  
GGYRLAKAPSLISMSEVVRATEGEIRPVECLDNATLCIVSEGCLPRRFWLGLKRTVDAYL  
ESVTLAEIAEPGFSAAEELAREETVVARD\*

>SPBDM4\_v1\_51028|ID:27159391|iscS| cysteine desulfurase (tRNA sulfurtransferase), PLP-dependent [Uncultured spirochete bdmA 4]

MNTRYVYMDYNATTPLRPEVRDLMVKSLDIYGNASSMHELGRKARAEIEGARANVAALIG  
TKDPSTVYFTSGGESNNTVFNTMFLRGRNQTRHKIITTAIEHPCVLNAA AHLRDEGFV  
VFLPVDRDGRIDMDAYRAELGPDVLLVSVMAANNEIGTIEDVGEIARLAKAQGAFVHTDA  
TQAVGKIPVSVEDWNVDYLTLSCHKIYGPKGIGALYVRRKTPIEPLIRGGHQENGVRAGT  
YNNLGIIGFGAARLAQEELSEYRQQVGLRAMLRDLILERIPMVRINGPAAEVLNNTLN  
VSFPGAEGESILLSLDLEGIEVSTGSACASGSLDPSHVLMIAIGLPELAHGSIRFSLGKY  
TTEDDVRYVADRLPPIIARLRKMSTIPLEQLAQGIG\*

>SPBDM4\_v1\_51029|ID:27159392| IscU protein [Uncultured spirochete bdmA 4]  
MDAFQWLYSDIVKDHFTNPRNVYDTRDKDFRPDAEGMVGNIKCGDQMMFMLKIENDLIT  
DVRWKTYGCASAIASSTMLSETIKGMSIRDAYHIKPADIADRLGGLPENKIHCSVLGDKA  
LRAAIDVYLERKGRAGEFSGEDAQIICKCLNISKDIEEAVRQGDWYTLQEATKIGTV  
CGSCKTKAEELLHEFVHIYS\*

>SPBDM4\_v1\_51030|ID:27159393| A/G-specific adenine glycosylase (fragment) [Uncultured spirochete bdmA 4]  
MNLSTAEDIAESRRFLEKGRACYRELPWRGVSVPWAILVSEIMLQQTQVSRVSAIYP  
RWIESFPVPSALARLPVSDVLAAWSGLGYNRRALS LHK TAKILAEYEDKVPASEEALRN  
LPGIGTYTARAVLAFANLPSVFLETNIRTVFIRHFCSAEHVGDKGLERIGEALLDVEN  
PRQWY TALMDYGAWLKVHESNFGKKASMYRPQSPFKGSERELRGAILKLLQTSPQTFVD  
LAYQVAADVERVSACA EKLEKEGFVHILRDDSFVSDSEGTLVGLADSV\*

>SPBDM4\_v1\_51031|ID:27159394| TRAP dicarboxylate transporter, DctP subunit [Uncultured spirochete bdmA 4]  
MRRSKEAVFALILLIPSAVFGQITLKL AHLNPPQPYDVASAAMAAVFKSEVESKSNQI  
KVEIYPDGVLGKEAETLIQVRSVVQSFISSSGGMAQFYPLIDVTNMPFAFSSYNVGYKV  
YDGEFGKELAADIEEKTGFHVLGFGESGGFFAITNSKRPIKSPSDMKGIKLRMTALPLHQ  
AIVKALGAYPSTVAWAEVYTSLSQSGVVDGQMNVPVSIIAMAKLQEVQKYITL TNHLYAPYV  
WVVNPKFYNGLPDQLKGVVDDAARTAI IAGRGLSRIIDSTDKGLPALAEKMQVYVPTKAE  
MKQFRDATVPAARDFMLAQYKEEGRVWVDKFFDAIDAAEKELGY\*

>SPBDM4\_v1\_51032|ID:27159395| D-alanyl-D-alanine carboxypeptidase [Uncultured spirochete bdmA 4]  
MKRNYGAARQSAF SHATRIFAGIFFIFIAVSGLSALSRNEFEQFGITIPAPPPLNARSAI  
LIDAA TGAVLYEKEADLALPPASLAKLVTLHVVMEEIKAGRLSPDELIEINAKDCSPYIP  
YGSSLMYLQPGMKVSVRDLMLGAAVVS GNDAAYALARRFAGSNERFAEMMNSAVRKLGF  
RMTFVPEPSGLSERNLVTARDFALFCKKYIELHPEALKELHSVKS IHFPRPEHATAQYHPD  
GIIIQYNRNPLIFS YEGADGLKTGYIIEVGYNMAATAMRNGNRFI AVLGGSSTSYANGT  
TLRTKDTKALLDWAFANFSTARPGYIMPKPLRVWFGAPIHVQPEPYGEAAVTVPAALASR  
VTARIDTPKSVKAPLHKDDKIGRIVYEIDNKEIASVDLVSPQEIARGGFFRTVLDSVLR  
FAYIFGKV\*

>SPBDM4\_v1\_51033|ID:27159396|asnS| asparaginyl tRNA synthetase [Uncultured spirochete bdmA 4]  
MTLLPTIKQLLAMEPEGQKIVVRGWVRTKRETKQSVFVEINDGSCFSNIQGVVDASLLAK  
DTVKDVLPRISTGASVEIRGALISSPAKGQKA EVA VQDIELIGEAPADRYPLQKKAHSLE  
FLRELAHLRVRTNTFGAVARVRNRMAFAIHQFFQERGFYVHTPIITASDAEGAGAMFQV  
TTLDLEALAKSGKPV DYEKDFGKRAYLTVSGQLNVETYCQALSRVYTFGPTFRAENSNT  
TRHLAEFWMIPEMAFVELPEDIALATEFIQFLVSTALKDCAEDITFFDQRVQPGLRESL  
EKVARTPFTHTMYTDAVRELEASHAEFEFKPYWGC DLQSEHEKFITEKIVGGPVVVTDYP  
KEIKAFYMKQNGDGKTVAAMDVLVPRFGEIIGSEREWRLDLLEKRIEELNLSKEAYGWY  
LDLRRFGSTPHSGFGLGFERLLMFVTGMTNIRDVIPYPRAPRQADF\*

>SPBDM4\_v1\_51034|ID:27159397| TM2 domain protein [Uncultured spirochete bdmA 4]  
MVKSRESGP IILMAEQSVRYSLSTAYLLWFISGFGALGFHRFYLGKTGTGVLLWLLTGGLG  
GVGSIYDLVTMPGQVREANIGYAVREALGSGSDAGFVPRVRREDS PERIILRLAKGNNGM

VTTGEVAIEANISIDEAQRQLDSLAKKGIAQVRIRSSGVLVYFFPEFSKENTDFVD\*

>SPBDM4\_v1\_51035|ID:27159398| putative Peptidase C14 caspase catalytic subunit p20 [Uncultured spirochete bdmA 4]

MRSEQKKEPRGENPGPGHRRMFLRAIALFVCAAIFALAFSGCEFFPTNASTLGGNKYAVV  
VGINDYINGSDLNYCVADAESMKKMLEDAGWTVNPITAESGEAIKKNATKSAIETALKSV  
PADTTTTFLFYSGHGSIDYSDDAYIVPSDYDGSVSSLISATEFSGWLDSTVATNKSVILD  
SCYSGGFVDAGDSVDSITDVGWVYDPDGIYAIMQTSTAADMFFRFGELLAQNAAASSTNPS  
TAPLVISAAGWAEESAEPDNPVGHGFFTYFLDAAAAGTNGHMKGSDSDGDGVLSCI  
EAYDYAKNALEQANYGYLPHITGGLRDFALIDNR\*

>SPBDM4\_v1\_51036|ID:27159399| exported protein of unknown function [Uncultured spirochete bdmA 4]

MKNTKFVILMLFLGFLGAKKAAALPAFNFYAGFANAWTSTSTTDVGYHVGWDASADVNNW  
IRVLLPHSASRIRSSTASILSPGFRGQFLDLAASNWLADGSRYRAWSAFGLGPEIGVGL  
NISHFGISRGTFLSTALLGNVAHYTQTSLYNAYMSWLKASWDLELKHGWAVSTSPFV  
EFA YRADGRSIVSGLGIGVKYAF\*

>SPBDM4\_v1\_51037|ID:27159400| exported protein of unknown function [Uncultured spirochete bdmA 4]

MRKIILLSIILASLFGSISACKPRIRLPEDNSLGGSNQWLVISSLYCQLKSEPSGAS  
HDLGILRRGTILKIMESKFSTDEGDQGTWFKVQNAQSGWVSIREAQTYSETQARNAA  
LRME\*

>SPBDM4\_v1\_51038|ID:27159401| protein of unknown function [Uncultured spirochete bdmA 4]

MDFFKTWILPPLIGAIIGYFTNWLAIKMLFRPYKTIRIAGIRLPFTPGILPREKDKLAGT  
LGNTVAKELLTPQVITKRIQSPEIQKAAAGAVKTALEGFLAQDIGRLFSSRQGSLLHDE  
TLHESDVSNYLSENELIDQSDASPLDESSLSSYVMESFRRLVSSVGVQASIKGIFAEFL  
ARVGEMEVRLDVSKEQFVGTILRAVPSFEDKDEDFPGSMRPGSEPKPHLLHALAELPPD  
ATIRALSDALVPKAYNYFLPHIDSFLHDDEFARLEVEAHAFVKKALNRLGTVQRLFVSI  
AGYDTKIAQAMPGIIEDLVQTIERLLREPSTPEKISEALCATLIAQRSKLDAQTPDAPES  
VRSEKSKEDKAILDVALLSLKDSSEELRQRAEKSYDRLSELQIKELVGISVSAEDISGFV  
LSAFVRTTGAHGDSGRSSTTIGALFVQVLEESSKDKTMAEFLGVRDEEIEQISLTLADAL  
LKLITRIPALVDAIDIRSMVSEKIDSLNMREVERIVLQVVRKELAWITWIGGILGAMIG  
IVQSIISIL\*

>SPBDM4\_v1\_51039|ID:27159402| putative Folylpolylglutamate synthase [Uncultured spirochete bdmA 4]

MHSMFLSDPHLDKSRCLAHALCVSVGHFTSIDEVYDFVLGYVNVEKQGATEFKLDRMRW  
MASELGNPHLGRVTVHVAGSKGKGSVATLIAKTLQTTGARTGLYTSPHIISWKERITESG  
QEIPYDIILKASEEVFALVQGKTAETFYGGELPTYFELTTLIAFCAFRLAGFEAQVIEVG  
LGGRLDSTNIVSPDVCVITPIELEHTQFLGSTIPLIAAEKAGIKNIPVFTIQPKPDAL  
GVISGRAKDMGSPCFVVGRLDILFSSVNVDTVGTCCRLEATETSPPALRALMIENSLEVRT  
PLVGSVYAGNMALALALSQLPVSLNAGHIQKGFASASMPARFEIVSRSPFIVLDGAHTP  
ESIRTILTTFLQLSPAPRMLLFCAYDKRHDEMAELLSPHFEEIIVTRPGTFKQSAPDLV  
FASFQKRKPATLLIESTEDAVQKAICGANEEKGAGLLVTGSFYLCAEFTKSKLCSEQCRSS  
HPEFRRSK\*

>SPBDM4\_v1\_51040|ID:27159403| protein of unknown function [Uncultured spirochete bdmA 4]

VRIVHAAEVGQLAKPMIHRRSRGAGFSQKVATPSVESTGPDRPLHLHDKQVIVIESEGA  
VFDINRYWHETAYLPSFIGCFGSNVDPISVGEIWRVTALETSLRGEHPLVILLAALRVLN  
VLFPSMQRAVIKTLKYSLEKTFDDLFLKDEKHPVEMMIIDWFSMAEGLIQELGRVPH  
FSTAEFLRSAYIAPRSEVLVYSYLAEMSAMRMWQNAGLGEFCFYRIAGKERGRPGEYLR  
AALSAGFERSSIMAIGSSAEMFRASQLAGIRFLPIVPGQEEESWKILAEQWFPAYLRGEA  
WKIDMQAEPFYEQMCSEFNVRTAGNIAARLELPNVSNDRR\*

>SPBDM4\_v1\_51041|ID:27159404| Replication-associated recombination protein A (modular protein) [Uncultured spirochete bdmA 4]

VAGQRNSMPSHPLFGPGEVGPSESAEPLASRMRPRTLDEFVGGQEHIVGEGRLLRRAIQKD  
QLSSVIFAGPPGTGKTTLARIANTTKSHFITLNAVLSGVADLREAIEQAKTYRDMYSRK  
TILFVDEVHRWNKSQQDALLPWIENGTAILGATTENPFFEVNRALLSRSRVFVLKQLSR  
DDLKFKVARQALEDRERGYGYIIFQFEAGALEHIVDTADGDARSLNLELAIETSTPKWP  
PSEGSTLSISMSDAEESIQRRAVLYDKDGDYHFDTISAFIKSVRGS DPDAALYWLARMVY  
AGEEPDFILRLLILASEDIGLADPNAISVVNSCAQAFDRVGLPEGQFHQAATLYCALA

PKSNTTLGYFDALKA VQADQAEVPDHLKDANRDKAAFHGHGEGYQYPHAYRDHWVAQQYLP  
GSLAGRLFYFPGSLGFEGTRRTDVLVRREAQLAVLPDDIEEEQEKNLVWSKEGEARRRWR  
VRSESSATERLIAIRAAIFDELSPKPIDNMVVADPRSGFYAMEALRRTAEGKAFIVLNDE  
AARLQLDNL SKTIQDVLHPEIVLYENLIETPQKTGILEAYLAEAKPNHMLLCEAARIPLE  
VSASLLNAV SQIKENAPRIVAFDIDAARSSMLSDALSSISLSEDESEFFGRFSEFEQAL  
GHGPTYMKTTAASQPLRGWLGDLKAKLPQLNAHKIDLRASYPRSFDEKELEEWLDPSNPY  
GAGFRARFSEHDHKLQLSLMQKYNKAPIWPIVITLFEFQITEPAIEKHISG\*

>SPBDM4\_v1\_51042|ID:27159405| protein of unknown function [Uncultured spirochete bdmA 4]  
MREYIARLAENSLPKAGKVKSGRTPHAVGLIVAATFILLAFSGCDNTFSVFQTSQEEKQ  
IGADLFKNTTVRAMADDSSNYALLGQVVWRPKSTTSEGSWDVFSVNGSTDYFAAGLAGD  
GTNIYVAKADKNNVLDDIYTTSDSGSSWTAMGAVTDIGSDAFVDWLKCANNTL FVAVHNS  
ASKYSLFYFDGSSFVSAGAAVSGIDAPLVDILYDGSSSYWLVS DSKVYKGTTLGAI AEDS  
TASNPDYDRYLLGVASDGAGRIVSRKDGYYIYSYASSVWTPIQIKSSTKLG PVFFLTQPA  
STPRILIGKGVSSYGYMEYNSTPTLKENGSSFISTSSSIYYSTMLSKQVQAFWQPVNEY  
DATKKTLLFILLASGGTDTYALYRNDYTISTGSWSGWTA E\*

>SPBDM4\_v1\_51043|ID:27159406| membrane protein of unknown function [Uncultured spirochete bdmA 4]  
MSKKLLAVIVLIASVNALTLGAQEKTSDPFAAARKKGDQSITILAGGFIPLFVLDNNGAL  
ISPSNMYPGASFGVQYRYMLGKSIGIGGSIAGSFVTTVGGGTLFFAPIGVTA AWIGGGE P  
MEYEISTELGMNLRLYGNGLIEPYAKLGAGFSRYVSSSWSIGAKVSWCFMPEFHLGTYS  
SLNSYANFLEFSVGAVYHF\*

>SPBDM4\_v1\_51044|ID:27159407| protein of unknown function [Uncultured spirochete bdmA 4]  
MERFVLVARPHGNIRQQWLKWKREAFDWRDDASMAMPEGFICGWFDASKFSTGLSKSAF  
SEHVQRTLTRYADEICAVLPDTRFRSSAIEARDRIMLKLDEL DIPKLKVTLERFAQDAG  
LEPCADALTPDNEAYRGIWLGSGTISSAPFPLSFKKYELVLYLAELPETPFSGFQFRTVA  
RIHRKTKAHPRTERE\*

>SPBDM4\_v1\_51045|ID:27159408| conserved protein of unknown function [Uncultured spirochete bdmA 4]  
MKRKSEDILSFLIDTISRWPGVDCICVDRRSQQDELDPHYALVFDVYYRRSVPAMDKRON  
LFDNPGAFESAPGGMKDRFFLDEIPIRVEYKHLPGVQDLVEHPLRH IKLLKNA GTYPLYR  
LLNFPLVFSRSDWIERMRAELNFPQEA WRGLFDSFSAKMEHYLSDFGAAAVSENQFFRL  
MSRAGFLRFAGASVFMFNHVFEP SHA EYESQLKTQPVLPANFASLWDSIAGERNDLSEFK  
KFELARLLAREIFELQ\*

>SPBDM4\_v1\_51046|ID:27159409| exported protein of unknown function [Uncultured spirochete bdmA 4]  
MRHTLRRQPGAGSCKVFLFLLFVSVFLCFFAVSCKGTEVYSFGWFDERGSRLAFSSSVAG  
SDVSSFSRQGEKRRYTLAKAVEVPEGYSVRLTFSALS GGTEFQVGYGDEK GKNTSVLCSI  
PEPGQFAFVLPFSGPNALRWVEVKILKMPQQISSGQDGSVQSSQNGSDAQALNSHETLSP  
PLSLQEIRFVSPMRGMRHENNTVELSPHFSFETKNGSGHYEIRGPFSDLPSGIMDSMQL E  
VVLEGGSGIAALFWGDQKLT YRHGGEKSAFSLPCSLFADTPDRIALDVKDDIRVISFCVV  
QSKATTELARIDPGLLVYHAPLDDKPYLARWDLRPEVLLFLFKDYAIQDRYLKRLAFFV  
EKIGFAGRLAQDSEIADLHGWNAHDYRPEDLARFFDTAAAQKFPLSAEEIELRELLIKEG  
VILKNGTRIVPGKGAIVSITQESPAYLQYRFLAHEL SHALFFTDGRYRDLVLSLYQKMTD  
DEKWFLIRYFRWMRYDVDS SYLMANEMQAYLVQQPLKDLEKYFSDTLGDRLAKEHPELAD  
AIHGYMQQHLSALVAIARQLDSYLQASYGFETGRLYRVR\*

>SPBDM4\_v1\_51047|ID:27159410| protein of unknown function [Uncultured spirochete bdmA 4]  
MGKNANKSPPGKNSDDVLEGLFISPLENSEFEKMEAEAAKILSPVKEPDLDESADASSA  
SISESREQELSEVKSSTKPASLAQE QVILRFAGELKSIKQDLLSINQHFEAMKKPQPLQS  
LQPGTSSSPGANAI EQTRGASET NQDTLQLLDDIRKLLLYLDRLLES LPEDKIEEFANSE  
FFNL YRHVFEKLGIS\*

>SPBDM4\_v1\_51048|ID:27159411| exported protein of unknown function [Uncultured spirochete bdmA 4]  
MPKFLLMYSPQRM P QSRQLLSLSYGLFSFLIAYCCISAVAGKAGLLAYQDMASQQQQI  
QKAIEYLQVQNQDKTHTIDDLKNNSLAAAERAATLGYIREGEMLIVLPEAWRNEDTRGDD  
MRLPVVMRDSTGLPDALIRLMAAITGVFAFLAIQLFHFKPRAQSVQRMSFEKQTEAP\*

>SPBDM4\_v1\_51049|ID:27159412| Penicillin-binding protein, 1A family [Uncultured spirochete bdmA 4]  
MYVFIALILALAAVLGIGLGLALSGTANTIRTENFTEFD TALPTKIYDINGRLITEFFAE  
EQRIPISIKELPDHLIEAFITREDQSFYSHHGFSLSR SIMRAATGQILGRNLGGGSTITQQ

LAGTLYADRRIVSIQRKLELWWALQLERRFTKEEILEMYLNRMIMGPAVYGVVEAASRYF  
FGHPAKDCTPEESAILAIQLSSPSRYNPFNRNPLARDRSKEILDQMVARHVITRADADES  
FDAYWASFDYSRVAVSAFYNRREDKAPWFSEYVRRQLEDLFYGSIDIYSDGLSVYTTLDLD  
KQAAADLYMKRGIETANASFKSTMSQRSLVADTTYVPIVELLGLAFDLPMLYAPQSRSES  
DSQNYFLNVVNPVLDAAASLMLNIASLKPVYGAASAKIKTELEKTTVEGALVTIDNSTGYI  
LALVGGSDYNQANQLIRATQAKLMPGSTFKPLYSSAIDSCKKITEGTYILDEPTTFYNED  
GTPYSPQNFKGWGTGSVLAWQALAHSMNVPSVKVLQTVGFDAAISRAAALLDITDPIEIR  
KTFPRYYPLALGVIGVTPLQMARAFS VFANGGKSITPIAIRYVEDRYGNVIAEPEKDAVQ  
AVRQRSPQVISQNAAIMIDMLKRVSSTGLAGATQSGSIFKQTS PDGKSYVIPIVGKGTG  
TTQNWADAWTLGSSPYTTAIWLGFDPRGNSLGVSTGATVAAPVWANYMRDIHIGLPYK  
NFSKPDSGLVSVCAKSGMLPTEYCS DGTVNLMYLDGTQPTQFCTLHGPSITPETLGPD  
QSQSENPLGPSIPRPEESPIFQNR\*

>SPBDM4\_v1\_51050|ID:27159413|gapA| glyceraldehyde-3-phosphate dehydrogenase A [Uncultured spirochete bdmA 4]

MKVAINGFGRIGRLVFQSIVDQNLLGKGGKIDVVA VVDIVTDAAYFAYQLKYDSVQGKL  
KAQVTSKKS DPAKSEDDVLV VNGHEIACIMAEKELKNLPWGKLGVDYVIESTGLFTDEKS  
FGHLEAGAKKVIITAPAKSKAEDKKIPMLLIGVNNEKYNPAKDNVVSNASCTTNCLAPLV  
YVLLKEGIGIETGLMTTIHSYTATQKVVDGVS KKDWRGGRAAANIIPSTTGAAKAVGEV  
LPEIKGKLTGMSFRVPTPTGSVVDLTFRSVKETS IQEIDALLKKASQTYLKGILGVTEEE  
LVSTDFIHDNRSSIYDSLATLQNNLPGEKRFFKVVSWYDNEWGYSNRVVDLLRYMASKDN  
F\*

>SPBDM4\_v1\_51051|ID:27159414|pgk| phosphoglycerate kinase [Uncultured spirochete bdmA 4]  
MIKTVRDVSLTGKRIIMRVDFNVPMKDGKVQDDTRIVAALPTIKYILDQKPRSLVLM SHL  
GDPDKDAKAKEKAEKEGKPFDLKAYLDGKHRMKPVAEYLSKLLGREVAFLPSCFGQKAA  
IDALPYGYVAMLENTFRHKEETAKEPAVQEV LARELAS YGEIYVDDAFGTAHRAHASTAT  
IAKFMAVRVGGFLMEKEVANLEPMLHNPPKPMVAIIGGAKVSSKIAVLENLLKNTSALMI  
GGGMAYTFLKAQGV PVGKSMVEDDFLD TARQLLDHAKAQGVEIVLPVDHIAADRFPDAT  
PVAVDSRAVPDGLMGLDVGPKTLRLYAKVISTAKSVLWNGPVG VFEFDAFAKGTEQVAKL  
VADATGRGALTVVGGGDSVA AVNKFGLA AKMSHVSTGGGASLEYLEGKELPGIACLEQK\*

>SPBDM4\_v1\_51052|ID:27159415|cysK| cysteine synthase A, O-acetylserine sulfhydrylase A subunit [Uncultured spirochete bdmA 4]

LRIYENITELIGNTPMIYLNKIGTSLPAKIAVKLEFQNP GHSVKDRPALAMLLEAERGGL  
LRPGMAILEPTSGNTGISLAMIAAARGYKCVIVMPESMSLERRAILKAYGAELILTPK SQ  
GMSGAI AEAKRLLSTKPDEYFMPMQFENPANPQAHR TSTAMEILED TDYGLDIFIAGVGT  
GGTLTG VGEVLKEKKPAVQIIAVEPAGSPVLSGGTAGPHGIMGIGAGFIPSILNTAIYDE  
IIRVSDEEAYS MARRAAKEEGLLVGISSGAVIHA AIKLASLKENKGKLVIVASSGERY  
LSTPLFSDLIAG\*

>SPBDM4\_v1\_51053|ID:27159416|cysE| Serine acetyltransferase [Uncultured spirochete bdmA 4]  
MKMKMKMKENNPKNRSTYNNERGS DIEAVLHRDPAARTKIEVILAYPGLHALWMHRIAYF  
LWHHGSKLLARLISNAARRLTGIEIHPAAKIGQRLFIDHGMGVVIGETA EIGDDVTLYHG  
VTLGGTSLERKKRHPTIGDRVTIGAGAKILGDISIGSDSRIGANA VVVKNVPPNSVVVGI  
PGQIVHRHIPHTASDEPDLHHERIPDVLGQRVHELTARVA ALEEVIANMKSGCEDKRQAG  
DVYS\*

>SPBDM4\_v1\_51054|ID:27159417|tpiA| Triosephosphate isomerase [Uncultured spirochete bdmA 4]  
MKRYFIAGNWKMYKTIPEAVSLASELKDKLSDCSEKLM IAPPFTALQAVAEVIRGTNILL  
GAQNMGP EESGAHTGEVSVLMLKDLGVRVVILGHSERRHTYGETDALINTKVKLALKHRL  
EVILCVGETLREREQGVLETVIRRQLA EQLQGV EPSALTEVTVA YEPVWAIGTGKTATPE  
DADAVHAFCRKVIATLYGQEA AKQILIQYGGSVK PENAAALMAKQNINGALVGGASLKAD  
TFVPIAKFR\*

>SPBDM4\_v1\_51055|ID:27159418| Preprotein translocase, SecY subunit [Uncultured spirochete bdmA 4]  
MGFFGVLLL VVFIIVCLLIFLVIIQDEDS DSIGGIFASGSQS AFGSRSSNVVVRITYVL  
GTLFFVTA FALAVVNKSP TGNVQKAVEQNSAQTATDEWVNNGGEGNQPAQDQTAPQSQAP  
QTEQPSAPATK\*

>SPBDM4\_v1\_51056|ID:27159419| protein of unknown function [Uncultured spirochete bdmA 4]

MVRRSFAEMGHEAAIVSDSPYGLSAYDFLVFMTESKGMLGGLLTFVPQKLARQDGLIGKR  
CLAMVRKSGLRAGYTLRKFMGALEHEGLIVVEGEIFSDANAAVQIARDAPLKR\*

>SPBDM4\_v1\_51057|ID:27159420| putative DnaJ-class molecular chaperone with C-terminal Zn finger domain  
[Uncultured spirochete bdmA 4]

MMKDYEILGVHPDSSPQDIKSAFRKQAKRFHPDMHYSTENTEARESPATIRESAMRLVL  
EAYKILSDAEKRRAYDRELRRREKENKGFYREFLKQRSDDPESQAKLIVYDLLHDLDEE  
ALAIYERSKAFPDFRLERWDRGEAMDSEYCIAEEYEKRGKYIKAYQIYKKIIMELEKP  
WFRYYFDVVALKFRFLILQKLPGRIDEEDYLDRLDEAIKLEIAPRETAQYLRKKVEMLLH  
RGDAEAAFEVLQQISQIYPKLAGFAALRTKVEHARDQSVAENRVS\*

>SPBDM4\_v1\_51058|ID:27159421| putative PpiC-type peptidyl-prolyl cis-trans isomerase [Uncultured spirochete  
bdmA 4]

MKKMTTWLMVFTFAAMPLFAQTSIDKPAATFKLTRQEVISVRQLRADIDRLLENATGAKLT  
VDQRKDVLDARINSMLFLQFCEREKISVSDAQVNAAVAQLRSQSGSNATDADLEKSLRAS  
GVFVDPAIYVRQRLLFEMYVRTQKQDEMKTVLKAPTADEILKAYDLAKVSLVRPDTIRIG  
VIYADTKGKSDADIKAKDLMNGISTALKANPSKFDEYVLRASESAGYKAIPSLYLEKTQ  
QSKSIFGDAFFNAAFQAKTGEITPVIQTPGFRIVRVNEFIAQKQLTSDPVPGNQNLTV  
QEFLAMQLASEKEQTFLNKTEADLIDSLRKEATIKVYAENLTW\*

>SPBDM4\_v1\_51059|ID:27159422|nusB| N utilization substance protein B homolog [Uncultured spirochete bdmA 4]  
VASRRKARILAVQALYAWDMSGQLADLLSFEWIDEDKREHYETDILDFSKLMIAGTIEQ  
IDVIDSMIKKHLEHWTFERLRKVDLAILRVGAYSIFYQKDIPAQISIDEAIEIAKEYGSE  
DSYRFINGVLDGIRKDIVEGTHDTREK\*

>SPBDM4\_v1\_51060|ID:27159423|map| Methionine aminopeptidase [Uncultured spirochete bdmA 4]  
MIRVKNERQIEGIRASCQMLSDMYEELRPLVRPGITPEELDTFAYDFIIRNGGKPAFLGY  
EGFPATLCVSVNEVVIHGIPDDRPLKEGDIVGIDSGIELNGYFSDAAMTLPVGTISDEAQ  
RLLNVTRESLNLAIARVGPCHARISDISRAVFSYATKNGLKVVQRQYCGHGVGLEIHEDPQI  
PNYVSVGPNPRLMPGMVLAIEPMINIGTSDVRVLDDDWTVVVTMDGSLSAHFEHTVLVTDS  
GCEVLTHW\*

>SPBDM4\_v1\_51061|ID:27159424| Protease Do [Uncultured spirochete bdmA 4]

MSIAKKLHSRNFANLVLGIVIGFALAFMFRANPSPNSASLPVVKAETPSMIAGSDTE  
AAISTAESVQNAFRNIAKTVLPATIVELDVVEGGQKAQQQQQTPQFPDFDFGPDNSTPQQ  
FQPEEGLGSGVIVRRSGKTVYVLTNNHVAGNATKITVKLSDGREFDGKLVGFDERKDV  
VKFETDDTDIAIAKLGDSKLVGDWAIALGSPFGYVSSVTTGIVSALGRSGGPDGNIND  
FIQTDAANKGNSGGALVNIRGEVVLNTWIASPTGGSVGLGFAIPINNIKGTIDDFIMH  
GAVKYGWLGVLSNITQDKASAKELGLEKKGALVGHVFLDGPASKAGILPGDFITAVDG  
KAVQSTDDLVRTVGDIKAGTTARFDLIRRGISMTISAKVDLRNNTVAANNANIFPGVTVI  
SLKSDSVDQTQLPAGVRGALVVDILAKSPAATMGLRTGDIITKINGKSVNDLKDFYEILN  
KESGKKLVFTVNRDGTAEATLAYVGK\*

>SPBDM4\_v1\_51062|ID:27159425| Phosphoribosyl transferase domain protein [Uncultured spirochete bdmA 4]  
MHKEFVPPYDMIRDNAIKLAYKIYKDFIPDVIYVSLRGGAYMGNVISEYFKFVKGNRPV  
FYAAVVARSYSGFDQQEMIRIDGWYTNPDFLRHGDQVLLVDDVFDVSGRTINYLAQVIMDR  
GLPRSDVKIAVHDYKVVREYMPQYLPIAPDYWCRKIEIKSREDEIWIHYMSHELEGLTEKE  
IADHYLKDDPELAEAMRLVVQH\*

>SPBDM4\_v1\_51063|ID:27159426|glgC| Glucose-1-phosphate adenylyltransferase [Uncultured spirochete bdmA 4]

MAEILSIVLGGGKGTFLPFTKERSKPAVPPGGKYRIVDIPISNCINSFGFKKIYILTQFN  
SASLHLHISHSYNFDHFSKGFVEILAAEQTPHSGWYEGTADAVRKNLIHFRPHKPTHYL  
IVSGDQLYRMDLGEMFRKHLESGLRTIAGTLVSRDAASSLGIKIKADGSDSDFMEKPG  
PTKDINDFSVPEGLKPGDADPQKPYLASMGYIFDAPLIEDALQMDANDFGKEIIPSIVA  
KEKVNTYVFGGYWEDIGTIRSFYEANIGLTDINPKFNFYDEHRPIYTHARNLPASKLNYC  
TLNQTASDGCITNASITSSIVGIRTVIESGASLDGVVCMGSDYYETEAEKAENRQKHV  
PNIGIGGGSIIIRHAIIDKNARIGSNCRIGIDPLPRDDGEYSTHYIVDGIIVIPKNQVIPD  
GTVI\*

>SPBDM4\_v1\_51064|ID:27159427|yprA| Uncharacterized ATP-dependent helicase YprA [Uncultured spirochete  
bdmA 4]

MFTVYPMNSETANAICDELASWLAGQSEIAWSTKLPARAPDIVPLPEDLSPVLVQALNGR

GKALYRHQKKSVELARARKDFVVVTPTASGKTLCYNLPVLQTLLEEPEGRALYLFPTKA  
LSQDQOSTLNEVMLAGSIGLTINTYDGDTPADIRTKARTSGRIISNPDMHLHAGILPNHT  
KWVKFFSNLKYIVIDELHAYRGVFGSHVASVLRLLRIAKFYGSSPVFIFSSATIANPRE  
LAEHYIERDVALVQENGAGSGEKIVFCVNPPLVDEVQGIRRSSSLEAESVMLWLLRKGVR  
TILFSRSLQVELLASYNQKLENPYNRDFGLVVKPYRSGLLPSEEREIEKGLRDGRIHG  
VVSTNALELGIDIGGLDAAVITGYPGSIASFWQQAGRAGRTFGVSLAVYIASSSPLDQYF  
AAHPEYFLSRSAEQAHIDAYNPYIFTDHLKCAVFELPFAEGEAFSPDPSNHKAAGLTVEA  
LEYLEEAGIVRHTAQRVYFWSAEGYPGEKISLRSATTENVIIVDVTQGRHDVIGEMDRPSA  
KELLFEKAVYIHLGTQYQVKNLDLEKRLCLVERSDVDYWTDSIVKRDIEVLSEDSTAPHE  
QFDLMLGDILVRSQVEKYKKLRFNTHENIGYGEIWLPEEMQTRSLMVVLKAESQSGRLL  
RQLAPERADGILYSVTNLIRQLAPARILCDLHDIGIASRVRDLFFKGPAMYFYDMYPGGT  
GIAEALHENLKETMASAIERLSNCPCSAAGCPCSCIGVEIAGSENKALSLQLLRLHGSPPG

\*

>SPBDM4\_v1\_51065|ID:27159428| protein of unknown function [Uncultured spirochete bdmA 4]  
VNLKDRALALIKSDREKNHQMPHGKRSMPGEGWTEISPFVWMREEDRPFIEVPLFFSPHLMR  
ATVPRGDQDNQEFQSVQVSPIPADRIAFFDLETTGLSGGSGTIAFLSTVAHFEGTDLVLR  
QTFLEDYPGEHDFLVAVISQLANVDWIASYNGATFDVPLLQARCVLNRIAMPLVRHIDVL  
HDCRRFWGRMVLSCSLTSMEALVLKKERESDIPGALVPRVWLDYVKADVPRDQALISL  
VWQHNVQDVASLAELFLVVEASAYRRPSNAVVRVYIDPSGLARNLLKMGRSGEAKSILLMV  
RDNAEMFELTSGARMRAMRHLASIAWKERNRTL YVETVLAMDDESLYGCVAKAKLCEHFF  
KDEKSALAWAQKARDIAGKGSQADRRNTQGLDLESLDHRIARLERKIAKKNLAE\*

>SPBDM4\_v1\_51066|ID:27159429|rlmN| putative dual-specificity RNA methyltransferase RlmN [Uncultured spirochete bdmA 4]

MNLSSPKSRNVVYPSGLSPDELAALLSDEPLYRVKQAFSWSKGIASFGAMTNMPQPLRE  
RLSAHFDGHMRSSGVENKLIDEDGSLKLQIRLRDGAAVECVLLEDIEGRKTAQLSSQAGC  
PMGCVFCKTGTLGFLRNLGPDEIVEQFHYLRDMRGFISNVVFMGMGEPLLNLDNVRKAIA  
ILSNPHGIGMSMRKITISTSGIVPGILDIAKDGPVRLAVSLTSANPELRTCLMPVNRTW  
PLDKLKAALLEYQKITNDRITLEVVLIGNVNAREKDAQELADWIHPLKTQVNLIAWNPIP  
GMPFETPSAKQVRQFSEILEQRGIVTVQRMGRGVMGACGQLGDTLKAKQ\*

>SPBDM4\_v1\_51067|ID:27159430| Tetratricopeptide TPR\_2 repeat-containing protein [Uncultured spirochete bdmA 4]

VSDIPSLPYNDFFFEVPEEIQSENTEIAETSCKGYQLLKENRFDEAIECFVQILEKDKEN  
NYALVGMGDAARKRDHFKEAADYRRCVLFHFGNSYALFGLADCYKALNQFQKAIIEWEQ  
YLLHDNTNITVLTRVADAYRKVHDFRKSISYHRVLELNPDNHYALIGLGHLYDFKEYK  
EALTYWQRMVELEGDNVDIRVLTAGNCRYRKLKHFDPKIPYFEKALEKEPENFYALFGIA  
DCYRGIGKQNMSLVYWNKILEKDPKNKVLTRAGDAYRNMGDFEKASEYYQNALNIEFDI  
YAVLGLAVIARQQGKYDEATASLRSLLQNDPKNYRIYVELAQT YLMNNQRQQAIEVLTEF  
QQMGIKNPVIQEALSKLAGKT\*

>SPBDM4\_v1\_51068|ID:27159431| putative Methyltransferase [Uncultured spirochete bdmA 4]  
MRITGGKLTGQIVRMPEGDLKIRPAMDRMRESVFAVLGDLSGYSFLDLFAGSGILGLEAA  
SRGAGPVVCVERDRKKFPVLLQNATISQPPVFCRAMPAETFILRNKAAFDIVFLDPPFDY  
RFKPQLLERLDQASASIEKSIVLIHFPHEHDLPEIVGNLQGYDIRSFGRSIVRFYRKIQ\*

>SPBDM4\_v1\_51069|ID:27159432|smpB| SsrA-binding protein [Uncultured spirochete bdmA 4]  
MRSQEPVKIIAQNRARFDYEIEESFECGIALQGTEVKSIIKGGRVSFGDFAEIKGQEVW  
LSNFHIAEYAHASAFSHDPDRPKLLLRQEIKRIDRRVREKGYTLIPLSIYLNHGLVKL  
ELGLCRGKKAYDKRADIKARDLDREIRREFRLKDW\*

>SPBDM4\_v1\_51070|ID:27159433| putative PEGA domain protein [Uncultured spirochete bdmA 4]  
MKETEKISEQDIAQAKVTLKPVFGIRPRVYPILYLLGILILFFILINPGLRNPGAYLV  
FQGAPESAAVYVDGSYAGNTLDGMHAKPGTHKVEIRKRGFSSQTLNTDVPHRIFATLIFR  
PTVKISYQLNPEPELAIIPSFKEFANWSLSGKPSAIYQLPMVLSEAANDAASASSADRS  
SFARPLLAAGLSVAENSTSVRDVIFASAALAAPGGSPLGLVAIARNAALLGTSKSYTAA  
IMETMPEKAGDNIRKAFSSLKEEMSAETLQQASAAGVRAAGPHSFIMFGGGQTKNVSSTP  
GGTKMLYLDRVPEFGLASTEVTQRQFARFLEEKPEWKPENRTALIEKGFADDA YLVDFDP  
SKADNRPITGVSWYAANAYCAWLNARAPSGYEVALPSEPMWETAASASRDV GALGAFNN

RASTGPLAVGSMGRDALGFSDLFGNVWEWTSDFRPHYAWIQDDSSAFGELTEAIDSKTVK  
GGSWANSADQISIASRGPVPAAHASEFLGFRPALIKK\*

>SPBDM4\_v1\_51071|ID:27159434| Signal peptidase I [Uncultured spirochete bdmA 4]  
MKRADFFDRLVIFSADMLTRRKQKSLRAKMKQQRHPVLDWAYAILWAACVVLVINQYIF  
QNYRIPSGSMENLLVGDMLFVDKLSYGPELLPGVLKTPGISKPHRGNIIIFENPSYLSR  
GPVYTVFQQLLYMVTFTLVDIDREPTGEPRVHYLIKRAIGVEGDTLRVRDGEVFIKPRGS  
PDFFDERTLMTALALPVKTQRLVASSEYPEIDKVGVASAYSELNLPFPASLGTSPVQSAN  
KDAFQYDMSRVTTLRDANPSNARNAQLAQR YGNGWFIADSRIFPMGDNRDNSRDGRYFGP  
VAEKKVLGHALFIYFPFSRIGGVR\*

>SPBDM4\_v1\_51072|ID:27159435| protein of unknown function [Uncultured spirochete bdmA 4]  
MFSRRPVRYAEKVERRKRNKILSYIVIFIILCVFIRIFILQWQVHDDLMPALRKADI  
VLVMPYILLGSKTPVGIAGSPQKNSIVLVS DGAEDIIPYRRKAEDAILRFITFQRFSPIS  
KEFGKDFNVPSVMRVRGIVQKKDGLQSKTFYALATDVQHNADRTLSVREVSAARIKGRVV  
FRIWPLARIGLIK\*

>SPBDM4\_v1\_51073|ID:27159436| putative Oxygen-independent coproporphyrinogen-III oxidase-like protein YggW  
[Uncultured spirochete bdmA 4]

MSSEAPQVYL VLPETKPFINSLYVHIPFCAGRCSYCDFFSVSARNCPQVFSLEYESSYV  
DAVLEQTQLWSEKFDAGPFSTIYIGGGTSPSVLNEGVLERLVKGLEPYAASGCEWTVEANP  
ESVHKSLLDMLAKTKVTRISLGVQTL SHDEWPALQRVGSVEDSKRSIDL VREYPFELSVD  
VLGIPQPQGRTEAWQSILLGSLEYLAERVSHISLYDLTLEEGTPLQRQVASGALVSPNA  
DAMAEARDAANALLASRGFQR YEVSNYARSGHECRHNLA YWNMRPYLGVGSGAVSTIQYC  
DPEEPM LGTMVRITGRKDSARYIAKPAEIPPEIEYIDRKTALFEFLMMGFRTARGVDTQ  
RISSLFGVDVAQIIP SALARWKPGIVRGRHCIALHTRNFDILNRFLVECLEELDKGGLG\*

>SPBDM4\_v1\_51074|ID:27159437| conserved protein of unknown function [Uncultured spirochete bdmA 4]

MTLFQYAVVASILHDEKQKRLLGNFESALEKAGGELQSLGSESVHPRNDTLPLFIFVLT  
GGTEADAMRLVVQEKMLQRNEPVVLLAHPSQNSLPASLEILAKLKQDGGKGTILQADAAG  
VFDEEALGDIVAVSQSMKALRASRIGVVGEPD WLIASHHDSKIVQDAWGPELKDIPFEE  
LLEIIEGIRSKPEKDINLPGLRGKAEFFSEANEADMRSMEILYALKTLVSRHGLSALT  
RCFDL VLRDHSTGCLALSALADEGVDAGCEGDIPSIIGLHWVRTLTGQTGWMANPSRITV  
QKEDDRAEMLIAHCTAPRSVLSRYGLRSHFESGLGVAIAGIPEGDVTLVRIGGKNLEKV  
WFSPARAIASPLKEGLCRTQAVL TMPSDKAQELLTDPLGNHLVMIQGNWVRRISAYLRLW  
KSA\*

>SPBDM4\_v1\_51075|ID:27159438| Metallo-beta-lactamase domain protein [Uncultured spirochete bdmA 4]

MKIYQHYSIFGFSNSYIIGNEDLGKALVVDPAELTPTMIEKIEQHFFDLRGILITHNHTH  
HINGLSTIMKIYSPTIYASNAKLLGFQCRKVKDGDI FREAGYEINAI AVPGHSQDSIVYL  
LAGLFLFTGDVLHAGLIGKTSSAFNTNALAARIQQKLFSLPDNTVIFPGHGPPSTIVTEK  
NANISYQEGFAEHIRSNYDFFV\*

>SPBDM4\_v1\_51076|ID:27159439| protein of unknown function [Uncultured spirochete bdmA 4]

LKSQFSKFTVFRSHNKNLELYKLEPEN VQSTNIDPLKLWISSEFSKLQSMNEDDPNEQK  
STSAPEKSHEIKLDRSRKQRWKEAPVNI ECWIFAFLEQPTKRYREKSRPMNEASSKTRL  
RMMFWACNS\*

>SPBDM4\_v1\_51077|ID:27159440| conserved protein of unknown function [Uncultured spirochete bdmA 4]

MCYACGESLSYGYKPGFNDVCDTCGKDLHVCLMCRFYAPGAHWDC AEDVEGPVVDKEKRN  
HCEFFMLAEKYIDK GKSRGIISGSDAKRKLDA LFGE\*

>SPBDM4\_v1\_51078|ID:27159441| putative Glutamate racemase [Uncultured spirochete bdmA 4]

MSIEESNVRVCVFD SGIGLPLFLKAIQEEFPFLEIN YVADDAGFPYGTKSPEAIHDILFE  
RIRIRARLDPDILVLS CMTAVQIGLKDLQAAHRSMHIIGAFPPIAAAARES QSRRIALF  
TTARAAEDAF LNDMIARDAPDIEVIRIPAQDLVEYVEQQLPFATLASAQASVEPYIKYVR  
DEGTDRIVLASSHFV LLED AIYGLLSEQGISNVRCLDSRKT VTSSELRRLVHTERRVQTAI  
QNPGFFLTGDRKTAPSYITWAGRFNLSVPQLL\*

>SPBDM4\_v1\_51079|ID:27159442|rsgA| putative ribosome biogenesis GTPase RsgA [Uncultured spirochete bdmA 4]

MSRSRGTTAMRGVVL SFSNQHAKVKCEDDQIRLCTIKGKRIRALD GWYNALAAGDHVSVQ  
PLSSAEGVIESLLSRKNVFGRYNEKGSADQAFANIDIVVCVTSTKTPFRPRFVDRVSV  
LAEQCGAPLLVVCNKVDLGLDGVVEKRLSVFESLGFVLRSSVALDLGIDELREALVGKI

SVFVVGQSGAGKSSLINRLIPGTTQRIGEVSEKYNRGRHTTTLATMLFSQSGDLSIIDTPG  
LRRRLAIRNINLNDLSAYFPFEMVFPFGLCDFGASCTHTHESGCAVRQAVSGGRIYHDRYES  
YLRIRAELEESKQWKKAETGKPQKAAYRFEDEE\*

>SPBDM4\_v1\_51080|ID:27159443|mutS| Endonuclease MutS2 [Uncultured spirochete bdmA 4]  
MITHEHSLARLDFRRLRERLEGYCLSYEGQALMRSTLPCSKIESVKRLKQDLAALAEGLN  
NKEIPSLPFPNIETLVPKAQKEGMLLEADELFAIGLWAKSYEELFVFLRSTLRASQARTS  
GVHGQKEKGQSGAGNSSDKSDSETGHLFLNECADMEDDECWALPGIERIAFSAPSLLIQIQ  
EKIFAVVTMEGAIKDLPRTRSLRTAIQKAQTENHHLVNQYLSDPNLQDALQSNAATERDN  
RTVIAVKANFKGRIKIVHEFSSTGQTVFIEPELVERNNRLELETKLGEEIRAVLRET  
ANALRPLLPGVEGRRFLAAADIRLARAIQAKREDLAIQVLESGVHLYQAKHPLLKKA  
VPIDVDIPEGTNVLIITGPNTGGKTVSLKTIGLLALLNQYGAGIPALSTSGFAVFDTVFA  
DIGDEQSIDQSLSTFSGHMRVISDIVRAATGRSLVLLDELGAGTDPEEGCAIAMALLDYF  
LERGCMTIVTTHHGVLKNGYTKSGCLNASMEFNAHLSPTYRIFMGVPGESRALEIAKQ  
TGLSSQIVDTARGYLDDERSDYSALIRSLGEKQRELDLLERERRKQLQGALESRRKADLE  
NLKIRQKELELRRQGV AELTRFLSESRKTFENLVREMRESGRKVEEVSAGRELLQEISDE  
IQQHS DGLARFEEETDVLERSMRSERDGVQSV DANILKPGERVLFQNR EAVFLRMLDDKK  
VLVQIGALRIPVAVDALSIPFAKKRKDGETRMSYQVELSGATGGGATASAELDLRGMRLA  
EALEALTRQIDAASLAGLGTFSVIHGTGEGVLGRGIHDWLKTQAAVADYYFARPEGGGFG  
KTWIHLKN\*

>SPBDM4\_v1\_51081|ID:27159444|yebC| conserved hypothetical protein [Uncultured spirochete bdmA 4]  
MSGHSHKATIKHKKGALDAKRGQLFTKLIKEISIAARMAGGDIENPRLRTAVLKARAAN  
MPKDNIDRAIKKGTGELEGAMYEELFYEA YTPGGGAMLIEVLTDNKNRAAAEIRNIVTRS  
GANLGTGTSVAYLFRKRGVLT YDGEKYTEDQIMEAALDAGADDVINEEDSIVVYTDSASF  
EDVLNAMNGKGFETLGAEVSMVPD TYISVDVETAQKIQLIDKLEENEDVQNVYHNIEMP  
EIEE\*

>SPBDM4\_v1\_51082|ID:27159445|ruvC| Crossover junction endodeoxyribonuclease RuvC [Uncultured spirochete bdmA 4]  
MSARRSIVAIGIDPGIAAVGYGLVGAAEGKLNLIAYGCIQTESPEPMGKRLAYIFHEIEK  
LLRQYAPDVGGIEELYFFRN VSSAFPVAEARGVIRLAFEEAHVELMQHTPNAIKKSVTGS  
ARADKNQVQEMVKMLLGMPQIPKPDHAADALAAAICTLHSIGPAGYTL\*

>SPBDM4\_v1\_51083|ID:27159446|ruvA| Holliday junction ATP-dependent DNA helicase RuvA [Uncultured spirochete bdmA 4]  
MFNRIKGIFSGHTEEALHISTGAIEWEIFVPVRDPSFFIRTGEETELFTWLHHYEDGMRL  
YGFFTAERQLFLDLQKVEGIGPRQAFKILQGIAPR TLATMLDNSDLASLQKIPGIGPKT  
AQKMMMLALKGK LIGLEGEAAIGVPVSQGRFRDVARALVEMGFDRKDVERVVAQLGADLQE  
NPESEKELFRKALLELSTGAGA\*

>SPBDM4\_v1\_51084|ID:27159447|ruvB| ATP-dependent DNA helicase, component of RuvABC resolvosome [Uncultured spirochete bdmA 4]  
MNFDDMDESSPHDPMNPTYDPGEDEKEASLRPRYMSEFQGGQERIKENLLIFIKAARERGE  
ALDHLFLMGPPGLGKTTLAI VVASEMGADFKPTSAPAIEKPKDLAGILT NLRPGGVLFID  
EIHRLKPAIEEMLYIAMEDFELDWIIGQGPAARTVRIPLQPFTLVGATTKAGMVSAPLSS  
RFGISLRFDY YAPEELASVIHRSSHILDIKIEDDAVELLAGTSRGT PRIANRLLRRMRDF  
AQVKGAGTITKD VVHDGLGRLEVDYLGLERLDREILKAIIMRFGGGPVGAETLAVSVSES  
VESLEDFYEPYLIQIGMLARTPRGRVATPAA YRHLGMEQPENGR LQF\*

>SPBDM4\_v1\_51085|ID:27159448|queA| S-adenosylmethionine:tRNA ribosyltransferase-isomerase [Uncultured spirochete bdmA 4]  
MKTDDFN FELPETLIAQYPPQRRGESRLMVLDR AEGKTVDSMVSDIASFIEPGTLMVFND  
SKVRKARVYGICEQTGARVEFVFLTPVEQESLIKIEELILHKG DQENVLVAPAQRIPSVS  
RLWRAVCSKAKRQKAGRSYAFPGDIRGILAEDIHDEKIIIEFSAAIGDDYFDRYGHVPLPP  
YIKREDTKADEQRYQTVYARRTGSAASPTAGLHFTPEILSSLRSKGIGIEYITLHVGLGT  
FLPVRTENIEDHRMHEEWF EITEDVAKKINA AKSNR KVLAVGT TSLRALES AWYGGAIH  
SGSFSTRIFIYPGF EFHVADRLFTNFHTPKSTLLMLVSAFAGRETIMEVYRSAIEKRYRF  
FSYGDAMLIL\*

>SPBDM4\_v1\_51086|ID:27159449|tmk| Thymidylate kinase [Uncultured spirochete bdmA 4]



MSFYNTDEFIKRFVIEGIDGAGTTTQLQLLTDNLGARGIPCVTTAEPTKNPIGLMIRAI  
LSGEMQAAPTTVAHLFAADRNEHIYGKQGIENIEAGSIVISDRYALSSLAYQGVTCGPE  
LPWLLNSAFPAPGLTLLFEVDPEVSIRRIHSREKKEIYETLEFQKRAHEMYEKMADRLQT  
RGWRIERIDAEKDTESVRRDIESHVFAFLGIQA\*

>SPBDM4\_v1\_51087|ID:27159450| exported protein of unknown function [Uncultured spirochete bdmA 4]

MRTKKPGIIALFSLVLAILATVTILDIVRREVQLATHTLDSVQALVMKTTGLRLKYDY  
LSIDALNRFSMHGIELLRENAPPAMSESSSPESDPHIRAPIQLQRLSLRVSWALLTG  
HNSEVLRDIVADDLRISLLMPEDESIINKILENFSGSGSASLPHFMLTVGPNVVRVQEQS  
TASGIPIQGGGLKEGTLKIDSLQFSSLSGSPEIVAPSISAEINGLFLPRDLSIKVGLQG  
SGAPDFSTFDVTMSASARTPQWLLMPQRLEVKKKEGGRIEVRREGALAVRGWYEGGAWGGE  
GQMEGYRPGEDVVVEGSWGEVVRGVTVSGSVSAQGEGLGGYKVAVGVEAGEGXX

>SPBDM4\_v1\_60001|ID:27159451| Endonuclease MutS2 (fragment) [Uncultured spirochete bdmA 4]

MRVISDIVRAATGRSLVLLDELGAGTDPEEGCAIAMALLDFFLERKSLTIATTHHGILKN  
YGYTKPGCLNASMEFDAQSLSPYRMCVGPGESRALEIARQTGLSDEIVATATSYLDDDE  
RTDYSALMRSLGEKQRELDRLQEKRKQLKGAQESRRNADLQNLKVRQRELELRRQGVAE  
LNRLSESRRTFENLVREIRESGRKVEEASSAREFLNELSEEAKRENDELRSFEAETKTL  
ARSLSDGNAPSRRIDPASASVGEKVLVYAGREAIIVRKLDEKRVLIQAGSLRIPVAMEDLS  
IPPLHKKPDSETKLVYQVELSSPGEESKPLPEIDVRGMRLAQALETLAHQIDAASLGGL  
GVFSIIHGTGEGILGKGIHEWLKTQPSVADYYFARPEDGGFGKTWVHLKP\*

>SPBDM4\_v1\_60002|ID:27159452| yebC| conserved hypothetical protein [Uncultured spirochete bdmA 4]

MGTSETIKDLQLTPIYAAWYRYAAFLSAKGVFMSGHSHKATIKHKKGALDAKRGQLFTKL  
IKEISIAARMGGGDPEGNRLRTAVLKARAANMPKDNIDRAIKKGTGELEGTIYEELFYE  
AYAPGGGAMLIEVLTDNKNRAAAEIRNIVTRSGANLGTAGSVAYLFRKRGVLTVDGEKYT  
EDQILEAALDAGADDVVNEDGSIVVFTDPASFEDVLNAMNAKGFETLGAEISMVPPTYIS  
VDAETAAKIQRLIDKLEENEDVQNVYHNIEMPEIEE\*

>SPBDM4\_v1\_60003|ID:27159453| ruvC| Crossover junction endodeoxyribonuclease RuvC [Uncultured spirochete bdmA 4]

MAARRAIVAIGIDPGIAAVGFGVVRTREGSLELIAHGCIQTESSVPMGKRLAHIFNEIKR  
LLQQYAPDVGGIEELYFFRNVSAPVAEARGVIRLAFEEANIELMQHSPNAIKKSVTGS  
ARADKLQVQEMVRILLGMKEIPKPDHAADALAAAICTLHSIGPAGYTL\*

>SPBDM4\_v1\_60004|ID:27159454| ruvA| Holliday junction ATP-dependent DNA helicase RuvA [Uncultured spirochete bdmA 4]

MFNRIRGILNGHADDALHVATGAIEWEIFVVRDPAFFSRVGEIEELYTWLHHYEDGMRL  
YGFISAPERQLFLDLQKVEGIGPRQAFKILQGIAPRALATMLDTSIDLVSQKIPGIGPKT  
AQKMMLALGKLIAGEVGVPAVQGRFRDVIRALIEMGFDRREVERVVAQLGADVQE  
GPESEKELFRKALLELSTGAGA\*

>SPBDM4\_v1\_60005|ID:27159455| ruvB| ATP-dependent DNA helicase, component of RuvABC resolvosome [Uncultured spirochete bdmA 4]

MNFDDMDESSPHDPMNPTYDPGEDEKEASLRPRYMSEFQGQERIKENLLIFIKAARERGE  
ALDHLFLMGPPGLGKTTLALVASEMGADFKPTSAPAIEKPKDLGILTNRPGGVLFID  
EIHRLKPAIEEMLYIAMEDFELDWIIGQGAARTVRIPLQPFTLVGATTKAGMVSAPLSS  
RFGISLRFDYAPEELASVIHRSSHILDIKIEDDAVELLAGTSRGTPIRANLLRRMRDF  
AQVKGAGTITKDVVHDGLGRLEVDYLGLERLDREILKAIIMRFGGGPVGAETLAVSVSES  
VESLEDFYEPYLIQIGMLARTPRGRVATPAA YRHLGMEQPNENGRLLQF\*

>SPBDM4\_v1\_60006|ID:27159456| queA| S-adenosylmethionine:tRNA ribosyltransferase-isomerase [Uncultured spirochete bdmA 4]

MKTDDFNFELPETLIAQYPPQRRGESRLMVLDRAGKTVDSMVSDIASFIEPGTLMVFND  
SKVRKARVYGICEQTGARVEFVFLTPVEQESLIKIEELILHKGQENVLVAPAQRIPSVS  
RLWRAVCSKAKRQKAGRSYAFPGDIRGILAEIDHDEKIIIEFSAAIGDDYFDRYGHVPLPP  
YIKREDTKADEQRYQTVYARRTGSAA SPTAGLHFTPEILSSLRSKIGIGIEYITLHVGLGT  
FLPVRTENIEDHRMHEEWFETEDVAKKINA AKSNGRKVLA VGTTS LRALES AWYGGAIH  
SGSFSTRIFIYPGFEFHVADRLFTNFHTPKSTLLMLVSAFAGRETIMEVYRSAIEKRYRF  
FSYGDAMLIL\*

>SPBDM4\_v1\_60007|ID:27159457| tmk| Thymidylate kinase [Uncultured spirochete bdmA 4]

MSFYNTDEFIKRFVIEGIDGAGTTTQLQLLTDNLGARGIPCVTTAEPTKNPIGLMIRAI  
LSGEMQAAPTTVAHLFAADRNEHIYGKQGIENIEAGSIVISDRYALSSLAYQGVTCPGE  
LPWLLNSAFPAPGLTLLFEVDPEVSIRRIHSREKKEIYETLEFQKRAHEMYEKMADRLQT  
RGWRIERIDAEKDTESVRRDIESHVFAFLGIQA\*

>SPBDM4\_v1\_60008|ID:27159458| exported protein of unknown function [Uncultured spirochete bdmA 4]  
MRTKKPGIIALFSLVLAILATVTILDIVRREVQLATHTLDSVQALVMKTTGLRLKYDY  
LSIDALNRFSMHGIELLRENAPPAMSESSSPESDPHIRAPIQLQRLSLRVSWALLTG  
HNSEVLRDIVADDLRISLLMPEDESIINKILENFSGSGSASLPHFMLTVGPVNVVRVQEQS  
TASGIPIQGGGLKEGTLKIDSLQFSSLSGSPEIVAPSISAEINGLFLPRDLSIKVGLQG  
SGAPDFSTFDVTMSASARTPQWLLMPQRLEVKKEGGRIEVRREGALAVRGWYEGGAWGVE  
GQMEGYRPGEDVVVEGSWGEVVRGVTVSGSVSAQGEVVVGGYKVAVGVEAGEGVEVSGY  
KVGGMVVRVTGAGDGERYWGTVVEGGQKGYRVRYEGVVGYRGMSVEGVYEVGGPGVAVKGE  
VRGGEGEYRVGVGGGEVKGIELGVGQGRVKMSQEGYEVGYAGAVGGGGVSVEGSIGKDGG  
YEGVVEARGIGAGSIGGLVGLKGVVEGRVSGRVYGLVRGGKVSALNGGEYEGKVEGVGVK  
ARVEGVGDEVGVEVKGAEVSVGGVTVGLKKGKGSYKGVFEGEVSAGGLAYGVEVTVAGER  
IGVKVGQTLVGGVTVAGGRVEGEVTLKDFGVGTGGGVVWLQGDVKGWYERGAWEGTVERL  
GVRYEGEGEYPEVLVSGTVDAKGANLAIDSIKYAGKQLKGTINVQYSSLMNPLKNMQALY  
SFTSIEDERAKIEGTVQALEGKITAAITGTSIPIEQFLSSSSNIAGDVQFQGTASISATG  
GKLSWADISLAELKFNCQKAEIKGIPFSAAGTISLKDINALSIHSGAFSYQNYKIDNIEAM  
YDLKQKLEYALNAKIVIAEKLLSAFLKGTGDINGSIFDKEAFKNAQFSGEITEAKFEST  
VLDPITYVFSIADNNLDIHFSQANGDNAHASIRNMTEFELTIANLNFVNGSARGTIQANN  
IEADINLDSMDXX

>SPBDM4\_v1\_70001|ID:27159459| Endonuclease MutS2 (fragment) [Uncultured spirochete bdmA 4]  
MRVISDIVRAATGRSLVLLDELGAGTDPEEGCAIAMALLDFFLERKSLTIATTHHGILKN  
YGYTKPGCLNASMEFDAQSLSPYRMCVIGGESRALEIARQTGLSDEIVATATSYLDDDE  
RTDYSALMRSLEKQRELDRLQEKRKQLKGAQESRRNADLQNLKVRQRELELRRQGVAE  
LNRLLESRRTFENLVREIRESGRKVEEASSAREFLNELSEEAKRENDELRFEAETKTL  
ARSLSDGNAPSRRIDPASASVGEKVLYAGREAIIVRKLDEKRVLIQAGSLRIPVAMEDLS  
IPPLHKKPDSETKLVYQVELSSPGEVSSKPLPEIDVRGMRLAQALETLAHQIDAASLGGL  
GVFSIIHGTGEGILGKGIHEWLKTQPSVADYYFARPEDGGFGKTWVHLKP\*

>SPBDM4\_v1\_70002|ID:27159460| yebC| conserved hypothetical protein [Uncultured spirochete bdmA 4]  
MGTSETIKDLQLTPIYAAWRYAAFLSAKGVFMSGHSHKATIKHKKGALDAKRGQLFTKL  
IKEISIAARMGGGDPEGNPRLRTAVLKARAANMPKDNIDRAIKKGTGELEGTIYEELFYE  
AYAPGGGAMLIEVLTDNKNRAAAEIRNIVTRSGANLGTAGSVAYLFRKRGVLTVDGEKYT  
EDQILEAALDAGADDVVNEDGSIVVFTDPASFEDVLNAMNAKGFETLGAEISMVPTYIS  
VDAETA AKIQLIDKLEENEDVQNVYHNIEMPEIEE\*

>SPBDM4\_v1\_70003|ID:27159461| ruvC| Crossover junction endodeoxyribonuclease RuvC [Uncultured spirochete bdmA 4]  
MAARRAIVAIGIDPGIAAVGFGVVRTREGSLELIAHGCIQTSSVPMGKRLAHIFNEIKR  
LLQQYAPDVGIEELYFFRNVSAPVAEARGVIRLAFEEANIELMQHSPNAIKKSVTGS  
ARADKLQVQEMVRILLGMKEIPKPDHAADALAAAICTLHSIGPAGYTL\*

>SPBDM4\_v1\_70004|ID:27159462| ruvA| Holliday junction ATP-dependent DNA helicase RuvA [Uncultured spirochete bdmA 4]  
MFNRIRGILNGHADDALHVATGAIEWEIFVPVRDPAFFSRVGEIEELYTWLHHYEDGMRL  
YGFISAPERQLFLDLQKVEGIGPRQAFKILQGIAPRALATMLDTSDLVSLQKIPGIGPKT  
AQKMLLALKGKLIAGEVGVPAVQGRFRDVIRALIEMGFDRREVERVVAQLGADVQE  
GPESEKELFRKALLELSTGAGA\*

>SPBDM4\_v1\_70005|ID:27159463| ruvB| ATP-dependent DNA helicase, component of RuvABC resolvasome [Uncultured spirochete bdmA 4]  
MNFDDMDESSPHDPMNPTYDPGEDEKEASLRPRYMSEFQGERIKENLLIFIKAARERGE  
ALDHLFLMGPPGLGKTTLALVASEMGADFKPTSAPAIEKPKDLGILTNLRPGGVLFID  
EIHRLKPAIEEMLYIAMEDFELDWIIGQGAARTVRIPLQPFTLVGATTKAGMVSAPLSS  
RFGISLRFDYAPEELASVIHRSSHILDIKIEDDAVELLAGTSRGTPIANRLLRRMRDF  
AQVKGAGTITKDVVHDGLGRLEVDYLGLERLDREILKAIIMRFGGGPVGAETLAVSVSES

VESLEDFYEPYLIQIGMLARTPRGRVATPAA YRHLGMEQPENENGRLQF\*

>SPBDM4\_v1\_70006|ID:27159464|queA| S-adenosylmethionine:tRNA ribosyltransferase-isomerase [Uncultured spirochete bdmA 4]

MKTDDDFNFELPETLIAQYPPQRRGESRLMVLDRAGKTVDSMVSDIASFIEPGTLMVFND  
SKVRKARVYGICEQTGARVEFVFLTPVEQESLIKIEELILHKGQENVLVAPAQRIPSVS  
RLWRAVCSKAKRQKAGRSYAFPGDIRGILAEIDHDEKIIIEFSA AIGDDYFDRYGHVPLPP  
YIKREDTKADEQRYQT VYARRTGS AASPTAGLHFTPEILSSLRSKGIGIEYITLHVGLGT  
FLPVRTENIEDHRMHEEWFEITEDVAKKINA AKSNR KVLAVGTTSLRALES AWYGGAIH  
SGSFSTRIFIYPGFEFHVADRLFTNFHTPKSTLLMLVSAFAGRETIMEVYRSAIEKRYRF  
FSYGDAMLIL\*

>SPBDM4\_v1\_70007|ID:27159465|tmk| Thymidylate kinase [Uncultured spirochete bdmA 4]

MSFYNTDEFIKRFIVIEGIDGAGTTTQLQLLTDNLGARGIPCVTTA EPTKNPIGLMIRAI  
LSGEMQAAPTVAHLFAADRNEHIY GKQGIENIEAGSIVISDRYALSSLAYQGVTCGPE  
LPWLLNSAFPAPGLTLLFEVDPEVSIRRIHSREKKEIYETLEFQKRAHEMYEKMADRLQT  
RGWRIERIDAEKDTESVRRDIESHVFAFLGIQA\*

>SPBDM4\_v1\_70008|ID:27159466| exported protein of unknown function [Uncultured spirochete bdmA 4]

MRTKKPGIIALFSLVLAILATVTILDIVRREVQLATHTLDSVQALVMKTTGLRLKYDY  
LSIDALNRFSMHGIELLRENPA PAMSESSPESDPHIRAPIQLQRLSLRVSWALLTG  
HNSEVLRDIVADDLRISLLMPEDESIINKILENFSGSGSASLPHFMLTVGPVNV RVQEQS  
TASGIPIQGGGLKEGTLKIDSLQFSSLSGSPEIVAPSISAEINGL FGLPRDLSIKVGLQG  
SGAPDFSTFDVTMSASARTPQWLLMPQRLEV KKEGGRIEVRREGALAVRGWYEGGAWGVE  
GQMEGYRPGEDVVVEGSWGEVVRGVTVSGSVSAQGEVGLGGYKVA VGV EAGEGVEVSGY  
KVGGM EVRVTGAGDGERYWGTV EGGQKGYRVRYEGVVG YRGMSVEGVYEVGGPGVA VKGE  
VRGGEGEYRVGVGGGEVKGIELGVGQGRVKMSQEGYEVGYAGAVGGGGVSV EGSIGKDGG  
YEGVVEARGIGAGSIGGLVGLKGV EGRVSGRVYGLVRGGKVSWSVSGGEYEGKVEGVGVK  
ARVEGVGDEVGYEVKGA E VSVGGVTVGLKKGKSYKGVFEGEVSAGGLAYGVEVTVAGER  
IGVKVGQTLVGGVTVAGGRVEGEVTLKDFGVGTGGGVVWLQGDVKGWYERGA WEGTVERL  
GVRYE GEGEYPEVLVSGTVDAKGANLAIDSIKYAGKQLKGTIN VQYSSLMNPLKNMQALY  
SFTSIEDERAKIEGTVQALEGKITAAITGTSIPIEQFLSSSSNIAGDVQFQGTASISATG  
GKLSWADISLAELKFNCQKAEIKGIPFSAAGTISLKD NALSISHS GAFSYQNYKIDNIEAM  
YDSLKQKLEYALNAKIVIAEKLLSAFLKGTGDINGSIFDKEAFKNAQFSGEITEAKFEST  
VLDPITYVFSIADNNLDIHFSQANGDNAHASIRNMTEFELTIANL FNVNGSARGTIQANN  
IEADINLDSMDLSLLQIFLPQEDIKDISNGSASMHLSGDISDPKIDGKILLNSV S FSSN  
AYLLEKVGPFNAEITINEGIIELSPTIVSIGTGNISVAATASLARWAIGDIKAFVSTGET  
ASVKFKGTIAGLTAKDISLKADIKANISQSKLEISGNILLDNGILEVNPTGFIASEDTGQ  
AAQPLSLNLA VTLGKNVELYLP SQDIPLVRGMASPN SALNILYDEASGALS VNGSVQLRS  
GYVFYLLRNFFIKQCSIDFSENQTKFNPLISTTAE LREPSKDGIIITLSADRTPFENFN  
PRLSSIPPKSETELLALLGGGLALS DLADNNPLTLREAVIAGSEFLTQNSLFRSFEQRVQ  
KALGVDVL YIQSSFIQRWLLDITDQTKSGQ TPLSEYLTGT E L FAGKYITDLAFAHFSLRM  
VQDPLEGTGPLQLDSELGLELQAPFGLLQWSMSL GKEGTPLNNQTL SLSWRINY\*

>SPBDM4\_v1\_70009|ID:27159467| Outer membrane protein assembly complex, YaeT protein [Uncultured spirochete bdmA 4]

MKYRRSFFIAAIMLFIAFHGVLAQDTSQATSQTASDDWFWDKPIAGFQWEGLHYANRNDL  
DSLLRAYIGTVFTDAVWTDIQA KLYALDWFETIEPV ALPAGDSKEKIVIKFIVVEKPSID  
SIRIVGNSALRTSELDAASSKND AIYNEDKAKADTLAMQKLYLQKGYPDATVELETTFS  
PQNSSRIILTFKVSEGS AVVVRKILFSGNAV FSSQTLKGQVTLKEAGLFQKGA FEESKLA  
ESRTAIEDY YASKGYVDAKVVDILKNYTKDEK GQKNYLDITFVVTEGKQW MFGGVSFEGN  
TIFSTSRLASLISLKQDDPLNLK RLLADKQKVDDLYYESGYIFNSIAMTQNRDEAAGSIS  
YKISIVERDRAHIGSITFKGNTKTKDYVIAREIPLEVGEVFSKSKVIDGLRNLYNLQYFS  
SIEPEIHQGSVEDLMDLVINVEEMSTAQIQFGLTLTG V GQSSTFPVSGFVKWNDSNMGGT  
GKDLQINMTLSPDEQSLVTSFGQNWLLNK RISSLSFTIKHAITQTAQDSVAPIFSTEDI  
PDPFIAEGSGTNEWNGLLSSVPDAYLMDYEDYTFSLGYS LGYVFKIPKGDIGVAGGVSSG  
VGMDSYDATKYRPEYEQEMRDYNGI WVLKDSIFGRVYLNHLDYWYNPGKGYFLSQRFTYTG  
FLPVERQFYIRSDTRAELYATLFSIPFSSTWVFSPIIGIHSVQALLAQPWTPLSVTKDW

VYLDGTFNVRGWSLYGSDGTMWENWLELRLPIVPQVLSLDGFIDAGAMKTEDGWLDMT  
LNSPSASAGSLDWKNFAFSTGFGARFVISQFPFRFYLAKRFFVFDGSAITWKTAAGSFDFV  
LSITQPLY\*

>SPBDM4\_v1\_70010|ID:27159468|mutS| DNA mismatch repair protein MutS [Uncultured spirochete bdmA 4]  
VLQEAAFYNVPMPESSMLDQYRRIKARHRDEILFFRLGDFYEMFNEDAQEASSILDITL  
TKRQGQPMCGIPYHAAKTYIARLLKAGKKVAICEQKPLAGKRGLMDREVIEVITPGTAVE  
DDYLEQTANNYLADICLLNNYLCSYLDVSTGEFKAHSIVYRNGESSEAIRTELYRLSPR  
ELLVQQSILDQPRLFQVIRESGAMIEPQQDWTYDLVHSLEILKKKFGLASLKGFGFDDQD  
PALAAAGHLLLEYVQEMIRQDCPHIRALLRYEQQEYVLLDEATKRNLELVKNLNDSSRRDT  
LIEVIDRKTAGGTRLLRQWLFQPLRKRKIEARLDAVAFLYHDQIFLGDVVRKILYGVLD  
TERLISRLAIDKAHAKDLRALRDSLDAGLNLFVVEAAQPPCALKPGLSAEHAEDCKHVI  
DAIDEAILDDPSVLLTEGDLIKDGYNAELDDLRLNMHKNTQAVLERYLEEEKQRSGIQNLR  
IRYNRVIGYYLEVTKGNLANVPGHFIRRQSLVGGERYTTDRLAELSKINGAQRIVELE  
KQLFLEVREGIKKYIPALLECSQISQIDCLASLAQAATEHGYPARPEICEDSEIHINGR  
HPVVEMCLPYGDFV PNSISFSRENQWFVLITGPNMAGKSTVLRQTALIVLLAHMGSFVPA  
DSARIGLVDKIFCRVGAQDNLARGESTFLVEMHETAFILNTATEKSLVIMDEVGRGTGTL  
DGVSIAWAVSEYLIHHIGCTRLFATHYHQLTTMAIPGVRNMKMAVIERDGNVSFPKRLEE  
GASSGSYGIHVARLAGLPDEVIFRASALESHFSTLERGLVEGNFKEANVPAQTAFSIPKD  
NQRNNALTPYEKNDLSPRHEA YSGELFSQEDLVIAELKNMDTDEITPLKALQILSELVGK  
LKQ\*

>SPBDM4\_v1\_70011|ID:27159469| conserved protein of unknown function [Uncultured spirochete bdmA 4]  
MHTLIENLVSASLDAVFPQRCILCGSIVSRVPWSPAPLCVSCHELTLECIGGPCRRCGR  
LISEQDYCVECRSEENALFRILPLFEFRGGAASLIHSYKIEERASLAYFYFAYKITKLEAL  
FDDTFGDFSIVPVPPEKIRTGKLDQVGVLAQVLAQFGFYKRLLVRLPGGRQKLLDR  
AERLKNASASYALRSPSQVPNRIMLLDDVCTTGATLEACARLLAREGTEVAGAIVLAAD\*

>SPBDM4\_v1\_70012|ID:27159470| putative Ribosome maturation factor RimP [Uncultured spirochete bdmA 4]  
MSDKELEKEIDEVLKAGGLDLLEFSASRHRGSLHVKA VIY GKNGTGTDECTKAYRLILPR  
VQMQLGVQNPYIEVYSPGIDRVIRTAREWQAFTDRFILFLTADRPDWCGRGRIHFENGIV  
QIETDDTVSNIPVASILKAKLDSSHEGEKAHGI\*

>SPBDM4\_v1\_70013|ID:27159471|nusA| Transcription termination/antitermination protein NusA [Uncultured  
spirochete bdmA 4]  
MASEMAEAI RQLISEKGIPEDLIVKTLEDSILAA YKKKFGTSENAVVRFKENYEGIEIYA  
KKTIVSDEDFEDEVLEIPLEEASKLAEAEIGDILEIPIDPSEFDQSVMLAKQTARQSL  
RDISRDTLYAEFKSKVGEIVIGYFQRERNGTIFVDLGVKVEGVFPHKYQSPRETYHVGDR  
KALIVEVEKTKTGFQVLSRTHAEFVRKLLLEIPEIYDKTIEIFKIVREPGYRTKVAVY  
TKRTDVPV GACVGPKGMRSQLISQELEGEKIDFIRYDINPKEFIQNALAPAQIKEYIIL  
DEARHMALAVVDEHEL SIAIGRSGQNVKLANRLCDWNIDVMTEEQYLQDSRNIELKKAAD  
SLFSTEEEQGEELLIKDL PDMKTDWITALEAADIRSIEQFLGLAESEISQRTSLSPDDVA  
AIRSIIENVEIVQEEVEEEEPESYVCPECGAPITPMDHCPSCGVALSFEVDEGQDE\*

>SPBDM4\_v1\_70014|ID:27159472| translation initiation factor IF-2 (fragment) [Uncultured spirochete bdmA 4]  
MGGSQYSGGTGGGGRTGYPSGRPGQPGGSRPGGYGGSRP GPGGGYGARPAPASMPPEGS  
RSSRRSPAKKKG SFGKREEELEKQIQ LKKKAEAKLASVPKSVDIMENISISELAKKM  
NLKPADLISKMLSLGVMATINQRIDADTAA ILAAEYGC EVKVVSLYDET VIEKAADKPED  
MEHRPPIVTVMGHVDHGKTKLLDAIRKTDVVSQEFGGITQHIGAYMVETPHGKISFLDTP  
GHAAFTKMRARGANITDIVILVVS AVEGVMPQTKEAIDHARAADVPIIVAVNKIDLPEAN  
PDRVKTQLSELGLIPEEWGGTTQFVEVSALQKKGIPELFDAILLQAEVLDLKANFDRLAE  
GKIIESRIDQGRGIVSTIMI QNGTLRIGDSFVAGIYPGKVRALFDDKGRVEEATPSMPV  
EVLGFEGMPEAGDPFEAVEDEK FARQISAKRQELKKYEEGRNVKKVTLDNL YETISQGEI  
KELKVIKGDVHGSVEALKGMLEKLSTKEVHLNAIRAAAGAITEDDVMMASASNAIIGF  
NVRPTPNAKQIAEREKVDVRKYNIYRAQEEIKQAMEGLLAPELKEQEVGKAEVRSIFRV  
PKVGIIAGCFVTEGVVKRSCQVRVIRDSIEIYQGNLSSLKRFKDDVKEVAAGYECGIGIE  
NCNDLQEGDILEFYEMVEVARTLDSGNDNGSDTKASS\*

>SPBDM4\_v1\_70015|ID:27159473|rbfA| Ribosome-binding factor A [Uncultured spirochete bdmA 4]  
MDQIRRRRLEELIREEISRMLALGEIKDPRVNSFLSITRVEAAQDGSHARVWVSSLEDEE

ARLDEAIAGLSHAAGFIQALIAKRVRRLRTPVLTVPDRGIKEAFEVTEKLDLLK\*

>SPBDM4\_v1\_70016|ID:27159474|truB| tRNA pseudouridine synthase B [Uncultured spirochete bdmA 4]  
MQRGGFFLVGKPA GPTS NRVLQDIRRSFLNEPGFRGLKFGHAGTLD SFASGLLVLVGRM  
TRLTPWFMHQAKEYEAVFRFGEETDTLDPLGKVIAAARTPTLSELENVLPFRGSIYQIP  
PSYSAVHVDGRRSYKIAKSGEIPQLSPRPV SIDKLELRTFEGNEASFTIRCSSGTYVRSL  
ARDIARACGSRAFVQALRRTRIGQFDVAAACSPLGCTVARLCEFTPDIARDIGLGTGILH  
KEFFIQFHGSLLPTEAVTLRHRGTSVVALFTEGGAFIGLVEKREEEWGARMVAAEELQQ  
\*

>SPBDM4\_v1\_70017|ID:27159475|putative riboflavin biosynthesis protein RibF [Uncultured spirochete bdmA 4]  
MKVLTWQEFNRDPPQEGLAATVGVFDGLHLGHQALIA TVKQEKPHLFP CVITFRENPKKF  
LHPSSYRGSLLTIEQKLSAIQSEGIEYCVLIDFSDNFATLAGREFLAALYNANVRFVAVG  
ENFQFGYKLD TDAAKLEALS GEIGMRSCSVKNVMYRGHPVSSSRVRHAVLENRLREAEEM  
LGRPYQIVARRERRGEHDMRELFVPEDDL VPPDGEYDV FVRDDETIEQTKVNVFHRHIA  
LGLRMQSERIRLAFVDKATQKENLVWL\*

>SPBDM4\_v1\_70018|ID:27159476|rpsO| 30S ribosomal subunit protein S15 [Uncultured spirochete bdmA 4]  
MALSKEDKAQVVLEYGKDPKNTGAIETQIALISSRISYLTEHFKTHKKDTNSRRGLLKL  
V  
GQRRKLLKYLQRTNLESYRAIMEKLQIRK\*

>SPBDM4\_v1\_70019|ID:27159477|pnp| polynucleotide phosphorylase/polyadenylase [Uncultured spirochete bdmA 4]  
MINKLECKIGNETLVLETGRMAKQANGAVFATYGGSAVIATACCSSTPTEGLDFVPLTVE  
YSEKYYAAGKIPGGFIKRETRPKDREILVSRIIDRPMRPLFRKEFGREIQVVPTCISADQ  
INPPDVIAANAASAAVHISDIPFDGPIGCVRVALVDGSYIVNPSYDQIERAKLEIVVAGT  
AVGITMVEGGSHESTEEMIQA IETAKEPISQICATIEELRRLAGKEKLALAPLLVELNN  
KEEIRVYARELLSSALFTKIKQERAKAVAQAIAAVKEKFKDSLTD DIQSKLFSKLMDDLQ  
YEILRSSILDKGLRVDGRGLEEIRPITCETGVL SRTHGSALFTRGETQVLA VTTLGTVFD  
EQIFDDIEGDRRERFMLHYNFPFVSVEVGR LGTGRREIGHGDLARRSIEPMLPPKEKFP  
YTIRVVAEVLESNGSSSMATVCS SSMALMHAGVPVSRPVAGIAMGLITDETRYAVLSDIL  
GDEDHLGDMDFKVAGTKDGITGFQMDIKISSVSTEILRKALDQAKRGR LHILSIMEKTIA  
APQSEISPLAPQVLSARIDPEKIGLVIGPAGKNIKAISEKYGVQINIEEDGSLTVYGGKQ  
KSAFDARDAILGMVEEPEVGKVYTGTVKRIMDFGAFIEILPGREGLCHISRLAKGRVEKV  
TDVLKEGDTIQVKLMEIDHLGRLNLA AVDSL DENG EAPQRPPRSEGRPSDRARDTRPPR  
ESYRDR\*

>SPBDM4\_v1\_70020|ID:27159478|protein of unknown function [Uncultured spirochete bdmA 4]  
VFDKMKKAPVLRRLFISGTIGSQIL IETLDVFGIVSTAGIAPTADFSRRGIENLTCPDTI  
LFAEVLYLARDRTAAPRSVADAGELRHS HQVNRRRRG\*

>SPBDM4\_v1\_70021|ID:27159479|dut| Deoxyuridine 5'-triphosphate nucleotidohydrolase [Uncultured spirochete bdmA 4]

MIKSSLRNKNLLTSAQSSTIQSEGHAMDVQISLSE DARIPQYATEYSAGADLFASLKEAV  
VLQPLSRALIPTGVKIALPPGYEAQVRPRSG LALRHGVTCLNTPGTIDSDYRGEIRVLLI  
NLGDKSFTIENGDR IAQLIAPIMQAHFSISEKLD DTSRGAGGFGSTGR\*

>SPBDM4\_v1\_70022|ID:27159480|putative Permease YjgP/YjgQ family protein [Uncultured spirochete bdmA 4]  
MIPRAARAVLALQAVEMKKGKPPFTLWRMMFQELMSSFLG AFFFFFFVFLINQVLLFAEDI  
LSRGADFFSVVKLLFYSLPTILAITIPFSVLA AALMTSSRQNADNEFLASSTLGIRPLWL  
YIPFLIAGLGIAIGSFYLNDSIPRAAQRYKHVY AELIRKSAKIELTPYSIKKYGEKLLV  
TGPSKAGRIQNILIDQKTGYDSNAV TANNV GIEFSADSLAAILSM DNVTEEKRLQNGNE  
GDFSITQAQSADIRIQIQEQMPNYS GAAPSEMSLAALAHQIKQKEGRLAIRQEENRSQQA  
TALDSLRLSYGSLQVQREPADSVSLKSQSPSKSENVGSVLNALKSLRNQKIDDTSLQIYR  
LEYQKKFVIPSACFFFALLAFPLGIGSKRAGRTAGFGIALLLSVIYWALLFAGQTFGYRQ  
NLDPVLSMWMPNLIMFVATAVLWIFRKITKGHFL\*

>SPBDM4\_v1\_70023|ID:27159481|putative Permease YjgP/YjgQ family protein [Uncultured spirochete bdmA 4]  
MMSTEKEMHAFPHGQRNVQGAPVLLWKTL SKNILLWTAGGTLFSLVISLVELFSLWKF  
LVRNASFGDILQWIGLGAPKHIAESLPVAFLFAIVFTLSNWHANNELEAVFSAGISLQRF  
LLPLFALSIVFCFAEFYLTDAVSIPFLRIRNTLQSEILKESDSRYTVPGLIVDKGRQVYT  
YRYFDEKNLRLYDVSIVERDPNGNLIRKVS AQNARWEDGTWYFVNATVYQKKGGSWEF SK  
IAKFADPAFKEPPSGFSRPTMDVRLN TRELQAQVSFLKASGLPSIDADVEKQRRLS FSL

TPLIVIGLAGVFAGRFKKSIFLLSMLFSLSSATLYYVAQMIASLAAKAGMVSPAFSIWSV  
MVGFAIVSVASYLRAKT\*

>SPBDM4\_v1\_70024|ID:27159482|tgt| Queuine tRNA-ribosyltransferase [Uncultured spirochete bdmA 4]  
MSEPIFHEIHRDSCRARTGILSLPHGDVQTPAFMPVGTNATVKA VEPKDIAEMGFSSIL  
ANTYHLFLRPGPEIIAKAGGLHGFSGWKGNFLTDSGGFQVFSLSQFRKILVEGVHFKSHI  
DGSSHVLTPEKVVDVQVAFNSDIQMALDICAPWGETEKKAYHAAMLTYDWAKRAKSQWLA  
QRDHGYQGYLFGIVQGNFYRELKRTSAEQIGSLDFPGIAIGGLSIGEPKDAYIEYLEYTA  
TLLPSEKPHYLMGIGTPDYIIIEAVRNGIDIFDCVYPTRTARNGLLFTSKGQITIKKAMYR  
EDYLPIDPECTCHVCRYSRAYLHHLFRNNEILYSMLASQHNLFMAQFVSDIRHAIEED  
KFELFAGNFLHVYEKMSSQD\*

>SPBDM4\_v1\_70025|ID:27159483| Transcription elongation factor [Uncultured spirochete bdmA 4]  
MAESPLNEKLQLMLNEEKWTRTLMANYSVVSLKELDRFIDETTAQGITDDIIKTCTDHLS  
QTKNSVIALYVAGILNIMRQPADESFLVQLMDLFAADSKKNNIIEYICNRMLDFGENRIAL  
MRLAECYTDENKIEQRYGVWERLVRIDTEEAELAQLIAEWKEKNGQFEDAIDFYKKALIR  
YINKGLFANIKEIWLKLIELSPEDMDFFLHAQKKIAKQISPEKAAMLLTDL YAWYKKSEK  
WETALNILKLIIEYDERNPALRKEFLDCYTAIYSGHSMFDECVRLSNLTQTYRSLHEAIA  
DFEKRIAFDKGNVVFHRTWNIGRISNITNDEVVVDFAKSRNHHMSLKMAFDSLTTLSRDH  
IWLKATWPREKL RDKVKTDPAWAIKIIKSFDNRADMKRIKAELVPSVLSPEWNSWSS  
RAKDILKTDPMFGNAQDDISTFIVRDRPLSFEEKIYAQFKAENFFARVQFFRDYIEMSN  
DLDTDYFEDMLS YFVSFLKLTQANEFMIGSYLLVKELSSRYPRLQQHVTMR FADLFGQIK  
DNIVPIYLALKDTELNRQLIQNIKT FVSNWPDVYIQLLPYARSAKMLDALESAGQEENLK  
RMAMYIVENYKDMREAFIWLARDLKDKPWLKELGIVREKIIITLLHILDITFKEIDSHKD  
TTENRKINKLVQNILFKEKDLEEFLEEAPQQVTERVYSMLADIKEVDPAIKLDLKKKISE  
RYPNIKFYDGNERTVSRGLMVTAVKYEEKHLLGHIMEVDVPANQKEIAFALSLGDLRE  
NAEYKAAKEKQDELNSKVGKLNELDRAQIIGPEHVDASNISFGTKLTLKNLANGEIEIF  
TILGPWESDPENQIISYLSPLGKHLLNHKTGETLNFTINERKFSYKVLKIVKAEF\*

>SPBDM4\_v1\_70026|ID:27159484| Tetratricopeptide TPR\_2 repeat-containing protein [Uncultured spirochete bdmA 4]  
MAYQPQTQSATAADNLAFAYESLKNADIQSADSYLENALKADFEHAEVLLAMKCMFAWKD  
QLSKMPETGNLLDRGDFLCASWKKFMLFLTRIGDTSETVRYAYKRFVFGALDQYLALPD  
KEKDALGAALDLRLGRARKATGDIETALIHLE RAMQAQRNDACVLAELADAYAMAGEARL  
SKALFREAFFLAPQTIEIEFLESEFILKIENIQELGYSGNDIAEWIPVYAEIWGVFNVK  
RELSVAEHNRIASARQLEIELRESPQRSSLVPRLLNRYFWMADHLKANGDENGLHSVL  
LKIKILDQSIHALYVE\*

>SPBDM4\_v1\_70027|ID:27159485|rpe| Ribulose-phosphate 3-epimerase [Uncultured spirochete bdmA 4]  
MKEPIIAPSILSADFYDIRAAIQDIESSECPWLHLDIMDGRFVPPITFGNKMVADIRKHT  
SLFMDVHLMIVEPERHIHTFIESGADAVTFHVEACIHAHRLVQTIRHAGIKAGISVVPST  
PVSAIVPLLESIDQVLVMTVNPYGGQKLLPFCLAKVDELREIREKNGMNFSAIDGGIN  
LATIQQIALHKPDVLIMGSAFFNAQDKKVFISDVLVNWEHAVENFE\*

>SPBDM4\_v1\_70028|ID:27159486| exported protein of unknown function [Uncultured spirochete bdmA 4]  
MKRLAIGCFLIFLNIGFLLYAQANPVALDEFGSAFDMFKRGDFQNA GASFAHLYQTPED  
VLAADSCFMAARA YFNAGDYPASYGFCEEFLQSYPGHSNIPDMEFQRGRILFKMGRFKEA  
TLAFNAFLDKYPDSTLYPSAFFWKAESLYCLGDIARALPLFNEIREKWP GSEQASLAAWR  
LNVMGLEAREAKYLRLAAFESERNSAGEIVEMQKEAYREQQYLRDYLLLKSLRGRNNFPA  
PSASPLNMKYSSRNDKLDMLLDAKKRALDLLISKIKEYLKEIAP\*

>SPBDM4\_v1\_70029|ID:27159487| protein of unknown function [Uncultured spirochete bdmA 4]  
MKRAVFFLIMIVVLVEMGAALDIRDGLVRITDDTLRPLMLYRLVNIAGKSKYEPLWFNG  
DPRTSFITISVDNRIYRMGYSQEYQTSQRRIQNGIEIEYRSVTNRVTQRIMFAALAGSRV  
ANGFIELEVENYTSRDMKIMLKEVCDTWLGENTGNHIALASKPKVTDEMLLNSDSKEPY  
IISPGQDASIALLFDS DPRPDSVVIANWKRLSDSKFFYDSELMRGFTLSPYSVNDALGL  
YWNEKIVPAKGVV KVESRWLSGGPGSEFISWLTQNYPPKEAEETQAISQKNASPGISSGF  
SLDVEAIQALVSRIDSAIENIDNVTDEDLQLILSELEALNSDVS GTPD\*

>SPBDM4\_v1\_70030|ID:27159488|dtd| D-tyrosyl-tRNA(Tyr) deacylase [Uncultured spirochete bdmA 4]  
MRAVVQRVSEATV TYVASSSQNLLDKREQLCGGISNGVLVYIGIGVEDAEEDA EYLADK

IAHLRIFMDDCEKMNLSILDLNYEALVISQFTLLADARKGRRPSYSQAAESSRAKALYEF  
FCERLREQGLHVQMCKFQEIIMRVRYINEGPVTILLDSKKAF\*

>SPBDM4\_v1\_70031|ID:27159489|ppdK| Pyruvate, phosphate dikinase [Uncultured spirochete bdmA 4]  
MPKKKFVYSFGAGVAEGNGSMKELLGGKGAGLHEMTKIGLPVPAGFTITTEVCDLYFKHE  
KKWPEGLEKEIQRHLKQLEKTTKTLGDPRDPLLVSVRSGAPVSMGMMETILNLGLTDA  
SVEGLAAKTGNRRFALDAYRRFIMMYGSTAMGIDREEFDKAFDGVKEKRTRVRLHVSAGQ  
KVNDTDVNEEELDELIGVFKKIYREHIKTDFFQDPWEQLKGAIDAVFNSWMAEKAVTYRK  
VEKLVGVKGTAVNVVQMVFGNKGETSGTGVCFTRDPNSGDNVFGDYLINAQGEDVVAGI  
RTPIKLAELEKRDPKVFKQLVSIRKKLETHYRDMQDLEFTVEEGKLYMLQCRTGKRSPIA  
AFHIAVSMVKEKLITKEEA VQRIKASDIEGIFYPMIDKSNPADLKKAFIVQGIDAVPGAA  
TGKVVFNAAAEWAAKGEKVILVRKETSPEDEVGGMHAAQGILTATGGKTSHA AVVARGW  
GKCCVVGCEKLDIDYEKGQFSVGDVTVREGDYITLDGGAGNVYIGQLKLVKPEPPKAYTI  
LMSWVDKIRTLKVRTNADTPYDAEKARELGAEGIGLCRTEHMFDFSEERILAIREMIAD  
DLESRKALAKVLPFQTKDFEGIFKAMNGLPVTIRLIDPPLHEFVPHDEEGQKALADAVG  
VPLEKVIQRVNQLHEANPMLGHRGCRLTITYPEILDMQVTAIITAACNMTKKGVKVLPEI  
MIPLVIDEKELKILETRTREVADAIKSGISLGYMVGTMIEVPRAALLADRIANVAEFF  
SFGTNDLTQMTLGLSRDDAGKFLPDYVDEKKAGIFKADPFQSLDQDGVGMLIRMGIEKGR  
ATRSLKLVGICGEHGGDPASVKFFHRVGMNYVSSSPFRVPVSRLAAAQAVVEDSLAAKKQ  
TKRRGRPPKSGVASAKPSKTSASKATVTQARRPRGRPRGSKNK\*

>SPBDM4\_v1\_70032|ID:27159490| protein of unknown function [Uncultured spirochete bdmA 4]  
MNKKELTNKVFAFFEKLITTEL VKLYINNVIIYSIFMSQ\*

>SPBDM4\_v1\_70033|ID:27159491| conserved exported protein of unknown function [Uncultured spirochete bdmA 4]  
MDKRIERMSKFWKVLPNLLLLIVSAFPLTSCIGIDASAKIDAKGAGTLSIEYQISKDFAQ  
LGSLESTPMLPLSREDIERGLQG VQGVTLKSYSKSERGDNIIVSLMLAFDSSSLAVY  
LDPNGKLAQYQQENGRSHLKL SFGDTVQPLDPQMKAEISEKLPYRFKFALEAPGAPEI  
SVKNGDFFQVTTSGKKTLECSMTDIITCDRVPEIDITWQ\*

>SPBDM4\_v1\_70034|ID:27159492|metG| Methionine--tRNA ligase [Uncultured spirochete bdmA 4]  
LTAPVCRDIVQTMKRRLITSALPYVNNVPHLGNLIQVLSADV FARFCRLRGYETLYVCGT  
DEYGTATETKALEEKVTPRELCDRFHAIHRDIYSWFEIAFDTFGRTSTPEHTEVTQSIFL  
DLDRNGYITSQSIDQLYCDTCGRFLADRYVRGTCPHCGYEGARGDQCEMCGKLLDPMELI  
DPKCVTCGGTPRLRSTHLYIDLPAILPKLEAWMKEASVKGFWANNVQMTQAWIRDGLH  
PRAITRDLKWGIPVPKKGFEKVFYVWFDAPIGYISMTAKLAKERGFDWKA WWQNPEGVE  
LFQFIGKDNIPFHTVIFPSSLLGSGRQWTMLHMHMSSEYLNYEAGKFSKSKGIGVFGTDA  
VETGIPADVWRFYIFWNRPETS DYTFTWTD FE EKVN GELIGNLGNLVNRTLTFVSRYYNG  
VVPAGEPNGAFWDEVIAREKEVGDHLERADLRDAFRSIFAISDIANKRFQDEEPWKARTS  
DPQKAASLMRDLCYVLKDLAIMIHPYMPKAAERLAGFFGLKLTGGGLAWRDLGLKGVLKN  
IQNPEMLFQKLEDDRIARLRERYSGSQKEREERETVPAAASPQSSQEPPEVRFHRIIDL  
VARIKIERHPKADKLYIETLDDGSGKERVIVSGLVPFYKEEDLLGKQIILVNNLKPAKL  
RGVESAGMLLAASAEGPEGKELVEVLNAPSATPGDRVFLEASEAETASKPAPADIIDVDT  
FFSIPIVARDGYAWIGSQRLKVGSDYIKLANVLNGEIG\*

>SPBDM4\_v1\_70035|ID:27159493| Methicillin resistance protein [Uncultured spirochete bdmA 4]  
MKDLPSIQISPITSADDCIPEYVSE SFLQTKFWGLFKARTGWRA YACSYRFEDKGIAGHL  
IVLRRRFARLFTFLYVPGAELIFLSERWEALALGRAIGKSLGGTDIFIRFDVPWKRS  
GGLSHA EKDSPPNSEIRKSGLHKGM DVQVPD TVVL DITRNEDDLLAGMKPKWRYNIRLSQ  
KRGVCVKDEGIQGLPTFMNLYQETARRDKIAIHPQSYKTLFETASEVSSLIEKESLEIP  
KPYFSLYVARHGSDALASIIVLHMGENATYLYGASSDKKRNVM PAYALQWHAITEAKKRG  
EKTYDFFGIPPEGYDASHPMAGLFLFKTGFGGDIVRRYGACDVGF RPVMYWMFRAGEQLR  
ALWHKKIKKNMGKFYHTIFKRRAPAQELERKEQSSSDN QDSEKTNPSNP\*

>SPBDM4\_v1\_70036|ID:27159494| AMMECR1-domain protein [Uncultured spirochete bdmA 4]  
VDFSISVDDQKLLKYARDVIHASFYDHGKVEAPELSATMRCGAFVTLIENGSLRGCIGR  
MRSNDPLVATVSEMALAAAFEDPRFPSLKKEELALIDIEITALSPLHPIAPDEVIVGKHG  
LLISAWGRSGVLLPQVPTEYGWDRET FLEQVCRKAGLSPDTWKSSLAQLYGFEGFVFSSES  
\*

>SPBDM4\_v1\_70037|ID:27159495| putative MEMO1 family protein MM\_1761 [Uncultured spirochete bdmA 4]

MQTERLTRSPLLSGIFYPSDANQLQSEINMLAAYAKQLPHPACAIVAPHGSFLYSGKIVA  
AAW GALIGTEPSLIVIAGPSHLPYEEGVFLPESMQFDIPGTSFSVDANLEDYLLAKIPAL  
KKNDLPHLEDHSIEMQLPFAAHFFPGVPILPCIVSGREQGTVDTVVKLLEEIRICVENQG  
VLVISSDLAVSDTAEEDSLSKEFIASLSTQKIEPFHGFDA SRHSFCGEAAIRAFRAAYP  
EARPTLLDYANSSAFNEHNDELVVG YGAI SFKR\*

>SPBDM4\_v1\_70038|ID:27159496| putative galactokinase (Galactose kinase) [Uncultured spirochete bdmA 4]  
MSAMKDFIAHQSEYETSPDCASAAPAIVKILGEHTDFTDGLVLAACLSFEVKVAVSFRK  
DNSLRFHAADFNERKRANIATLKYKREDRWANHIKSICDYFWSTFDIEPRGLNVTIQSNV  
PLGLGLGISSALNMASAYIFKTLYNLDLQDELA VHAWKAQSTFFEKELPITNYLGITAP  
AGRSFSVIDLRLKKRRGIQFLPEPWEMLLTDSKVPRASVDAELEQRTADCNTCLSVLAPG  
RNRSIRDIAPRELDELLGIVPERKRRRCLHVLEEVRRVGEAEEALS RQDYVSFGRVVNKS  
HASLRSLYEISCPIDWLTKRALELDGVLC SRLVGGQFGGSTLTILKSEEKEAYHHKLEE  
YERIFGFRPIVHEVSTGAGLRILEH\*

>SPBDM4\_v1\_70039|ID:27159497|surE| 5'-nucleotidase SurE [Uncultured spirochete bdmA 4]  
MRILLTNDGDIQSEGLHALIDVLSALRDAEGKPLHEIWTVAPEHERSGVSHAMTLK KPTK  
IKKLGDFRYSCSGTPADCIIVAGLGV LHEAPDLVISGINKGPNLGTDIISGTCGAARQA  
ALEGIPAIAMSCATFSDNLEYRGLTSFLTDNLEKLVALWEPDSFININGPSTSCSNLRAV  
WATPGKNRYLDNLKCFDGADGYTYCFLAEGRQERTPDVFS DHHA VSQGFIAVSLVEIHR  
AFHDASLNGAPVF\*

>SPBDM4\_v1\_70040|ID:27159498| conserved protein of unknown function [Uncultured spirochete bdmA 4]  
MDTETLSKPRCFECIRCNGCCSGQPGYVWLSKKDLDTLSDFLHVSKRKFALDYCKPVDIG  
LSYTLSLKEKQNHDCIFLENSGCIVYNARPAQCRTYPFWGAILEEEESWIGEGKACPGIG  
RGAIPSEIIVNAILERRQNPLSIEKVAELKGLEAEWGT\*

>SPBDM4\_v1\_70041|ID:27159499| Aminodeoxychorismate lyase [Uncultured spirochete bdmA 4]  
MGHVMKYHKIKGFVQFFLLSCILFIVL GILIFVPPFRKDSAEIKIKKGSSLSIVARELY  
DARIIPSSKVVFYMRILGADRTIRTGT YRFAPSLPPFLVAQKLIRGETVAQKVIIPEGR  
TASQIAQILESQNI VSKDAFLSAVNDAEFAKKLEIPAASCEGYLFPD TYFFEQESDPQDI  
IEQMVS NFRAVIKKIEGSHISALTPQELYQKVVLASIVEREYRLPEDAPLIASVFFNRLE  
KKMPLQSCATVVYVLT EHLGRPHPSVVY YNDLRVKDPYNTYINRGLPPGPISNPGKISLS  
AVLFPSETNFLYFRLDNASSGKHRFSRTLEEHNEAAIIPKEL\*

>SPBDM4\_v1\_70042|ID:27159500| DNA primase (fragment) [Uncultured spirochete bdmA 4]  
MARISPQIRQEILDKTDFLSVYQEHVHLQKKGGSYWG LCPFHSEKTPSFSVSDTGLFYC  
FGCHKGGSVIQFLMDVDKLTYTEAMEEL AHRSGVQIHFEESERAGEAEKERQALFELYDR  
LSKTFHWFLVNHASGRKGLEVL YKRGLTDV LIEKFSLGYAPANRQWLYSFLKAKGYSDF  
LRHSGLFSKNDQYWPLFADRIMFPISDV KGRVIAFGGRAMDQEGPKYINSPETA VFKKQD  
TLFALSQALDSIKSADEAIVCEGYMDVLSFHAAGMTNA VAPLGTAF TSHQAMALRRRASR  
VVLCFDSDEAGLHAAERAC SIAAGVGL ETSVLLPEGGKDASEILEKKGEGELTRMSKNTI  
NAGHFLLTRASQLFDISTMEGKAKA VSFLFPFLDALDSDVQRQGYIREIGKALGVGAHAV  
EMDYAKAKVSGINRSRNAPSSNS\*

>SPBDM4\_v1\_70043|ID:27159501| protein of unknown function [Uncultured spirochete bdmA 4]  
MAAATNTKSDVLA EFDAPGYEFELGAF LERFIPDTFAFA\*

>SPBDM4\_v1\_70044|ID:27159502| protein of unknown function [Uncultured spirochete bdmA 4]  
VNLDSDNIDD PRAKDLFSALQEAQKEGIQDIEGILSLCADDAAVRFVREVDASGELKEGL  
EKILQD GIAQKRRRAILEKERKRLVAQLQTSQSGSSDILQEK MILEDIMKIDGELKASGGD  
INE\*

>SPBDM4\_v1\_70045|ID:27159503|rpoD| RNA polymerase sigma factor RpoD [Uncultured spirochete bdmA 4]  
MSDIELDPAITKVLEYAKEKKMISFDELSDMLPEQILNSDKMEAIINLLVSSNVKIEEEV  
QIEEEPLPKLAAIPSKSKMVANDKEMASDDPVRLYL RDIGRENLLTAEQEVLSRTMEQG  
ENIIKNTLRKSGMLIPEFHQIVAKATRKEPKDLSLQKKENTEKIAERRRLNQFYKELVDT  
SASDLKGYIELKRWIIAKGGNIFEDQQLKEIRERLLPIVNETDIHPEEITAFSEKFIAAA  
KKIIRYRKEQDRIEGILQVSSRDLRALGRNLTIKEKREEIEQRLGLNAEEIKDRIRQLQ  
VNEKKLKD IENNFETPIERIISMAREVNRGRKMMKSAKDKLIKANLRLVVSIAKKYTNRG  
MQFFDLVQEGNIGLIKAVEKFEYRKG YKFSTYATWWIRQAITRSISDQARTIRVPVHMIE  
QINKVVRESRQLMQKLGREPTDEEVA AQLGWEIDRVKAVKNVAREPVS LDTPIGEDEDSL



LQDFIEDKEVENPAVKTDYNLLQEQLRMVLATLPKREQEVLRMRFGLEDEGYSLTLEEVGL  
YFNVTRERIRQIEAKALKKLRQFKRSQKLRDYIDH\*

>SPBDM4\_v1\_70046|ID:27159504| conserved protein of unknown function [Uncultured spirochete bdmA 4]  
MPMRMDEVFETLRQYQEMLSKRVELEKQLEAMPKTIEIQNQMLSREKKTFFVEVREQYELS  
EASLKELRQALAEAELKRENAEKQMDGITTQREYDAANKEIREASEKEQELRRRIQEEER  
RFADIDDLRHRIEMSVSTLEAEIAQKRAEIDENSREISNDVDKLRTEENDLTQELDEDLK  
FKFERIIRSKSGMGIVPIHGVCCTGCHMILPANFVNEVRQADKIVFCPYCSRILYYEETE  
ADESMEEILTGSLVDLSNDEESEEAEESESNDDESDDASSKSKRGSGRKKKIQDEPLIDND  
FLIDTMDE\*

>SPBDM4\_v1\_70047|ID:27159505| protein of unknown function [Uncultured spirochete bdmA 4]  
MPHFAAKIAGRPLECISNDTSREMAAVQKAQNAPDAHRTRLTGPPFFDIVICNAQHIFSK  
E\*

>SPBDM4\_v1\_70048|ID:27159506| putative Tetratricopeptide repeat domain protein [Uncultured spirochete bdmA 4]  
MPNTFFRRNRAHFPRKSLWFIFLLLIVSVSFLGVYLIHNQNSKNILSRAELATLWNSG  
NIEKTLTESRKATESFPFDEYYLSIKGISSYYWALNAQDEESRQQLFEESVVSRLKALAV  
GVPKMRQIYYVLAKAYYQKGDWFDMAERYFLLAKDNGSKEQDIPQYLAIIVYAGKKDY  
ARAADWFELALKNDASDPLLLSAAITYNNINQKEKSRDLLLRLEASASDAKIRLAKALLL  
AQDSFDAGDISAALQGYQEVKEDPLNVDAWYGLGLVYSKKNQDLGARA AFRKVVQIDPN  
HADARRRLAEKL\*

>SPBDM4\_v1\_70049|ID:27159507|mreB| cell wall structural complex MreBCD, actin-like component MreB  
[Uncultured spirochete bdmA 4]  
VGILDMFSPDIGIDLGTCLNTLIYVKGKGIVLNEPSVVAVERGTNRIVAVGTEAKGMLSRT  
PTDIIAKRPLRDGVIADPDMTEKMIKYFIQKVFKNLFFKPRVVVGVPCTCITKVEENAVI  
DSTYKAGARMVKVIAESLAAAIGAGIPITEPAGHMICDIGGGTTEISVISLKGMMVVTNAI  
RIGGDEFDDAIVKHIRSIHNLIGEQTAEERLKEIGNASPERTIEKMEIKGTDAITGLPR  
RFEVDSVEIREALMDSVNLIVEEVKKTGLKTPPELAADIVERGIVLSGGGALLKGLPKLI  
AKETGVPVILAERPPECVALGAGQYFEIMQRNIGSSSVYESLNL\*

>SPBDM4\_v1\_70050|ID:27159508| putative Cell shape-determining protein MreC [Uncultured spirochete bdmA 4]  
MKNSRFHGPTRAHVHQAACLILSLMILFVSTKTMVRLPDIFKGYVIGGLQKSFSASVSSF  
FSRTVGAVSQLRVQKDYELLNKMQDYESRERDFAALKEENQRLKELLDLSSLPNTKKM  
AAHVIARDPSNTYSSLVIDKGYDDGIRKYMPVIA YQDGLGLVGKIIEVKASTSILQPLY  
DQRFYAAARLAKTRAEGMINGEGFRDSPLSLLYIPKSEMDQLKQGDIVVTSGLDQVFPPE  
IMIGRVGNFRLNEFSSSLVIDVQPAIDLSRIEYVFAIDVSSMLSSGKGPBK\*

>SPBDM4\_v1\_70051|ID:27159509| putative Rod shape-determining protein MreD [Uncultured spirochete bdmA 4]  
MSSILISSAAAILMLFIQSTWLSHGIFLGIIPDLAMSVLLFSSFINNGQGIIVSFVVGI  
VADMLSASPLGYYAFLFSSCAYLATLLSYTTEKDVFIIPFLLGTGATIVMGFLSRIIALV  
FSANIHSYQIFSAEFGVELIMNGLFTVLIFLFSVQRFFEHSRPRKALP\*

>SPBDM4\_v1\_70052|ID:27159510| Penicillin-binding protein 2 [Uncultured spirochete bdmA 4]  
MAVLQKKITRRIRILRILIVALIVVYSINLFLSLQILRKKLKFVSEAERVSIQSTRIPAPRG  
EIYDRSGSVLLAGNIEAYS VYITPSELPAKRRKIVVDNLAKLLNISTDDIESKLPDPNSY  
SYGRVAVAKNASLAAVTEIAARIDEFPSVSWTTKPLRDYADLGSLSNVIGYVGNITRDEY  
KLLYNKGYTLDDLTGKSGVELTYEDLLKKGKDGWISKAVDVHKGKDISGNAAKIQAPVSGKR  
LILSIDTNIQKIAEEALGKRQGSVIVLKPATGEVLAMVTYPYDSRVFMSDNAGKAYLDL  
LNDPQKPM LNRAYQSSYPPASTFKTILTASILEESFIPDKTIYCPGEISYGGRSWSCWI  
KRPGHGSLALEDALAQSCDIYYWTVGRDYVGVENIVSYAQDFGYGKDTGVDLPGENGGLL  
PTPSWKEEKYNEPWP TPGDTMNSIGQGYMLASPLQVANMMAMIVNGGVYKPHVLKEVRD  
PGTGALINEIQPEVLHKSSISAKTFDTLRSYLRNVIVNGTAKVPISKVQIAGKTGTGE  
IGLKDRWHSWFASFGPCDAPPKQIVVVTMIEASNPWEWWGPYAANVIYQAIYAGQNAQA  
AAQTVGVRLEGSSLSGRRE\*

>SPBDM4\_v1\_70053|ID:27159511|mrdB| Rod shape-determining protein RodA [Uncultured spirochete bdmA 4]  
MNFQSIRRLFGNIDYLLFATFFLCAIGIAAIYSAGVDANGMVVSNEYIKQIIFVIGFF  
LLIGAALIDFSRLKDTVWMFFAFTIILLV LTRLAGKVNGSRSWLGFAGFGIQPAEFAKI  
TTVLMLARYLDSAEFDSFKKLLKSALILSIPLVLILSQPDFGSALVFLPAALVMLTLAD  
VDFRYILFGVLSIIGIFLFLSLPLYAANHPNPENIYIILITQDKILFIVFAFILIIIS

GMGWLKFKKQYYYWLSYSLAILAFSIAGATAAHKILKPYQIERLLVFIDPNIDPKGSGWN  
ILQSITAIGSGGFWGKGFLOGTHSHARYIPQQSTDFIFSIIAEFGFLGCIVLFLVLYAVI  
FIRCFILIETSKDRFSQFVVGILGIFTFHFMINIGMAMGIMPVTGIPLYFVSYGGSALW  
SGLISIGILTGISARRYTA\*

>SPBDM4\_v1\_70054|ID:27159512| Radical SAM domain protein [Uncultured spirochete bdmA 4]  
VNKRFIKPMKDIGAALFQVQKPARYVGGEGCAVPPIEQGDSRLRIASFPDLYEIGMSNN  
ALRIIYSMLNERRDLLACERVFAPAPDFEQLLIQKNIPLYTLESGIPLFNTDVLAVFTVGY  
ELLATNMLAIMEQGGVPIETARRGEKDPIVIAGGPAITNPLPFARFLDAVWIGEAEGFV  
DLMIEMAEFKKRGADRQEKLLSEHPSIWISPLLEKRLGLSHEKHVVRAIFQDFYKTEY  
APRFPYPVLNPVHAHGSVEIMRGCPCNGCRFCHAGYFYRPPQRSKYPEIIKKEVEELVLRKG  
YREITLSSLSSGDYPGIVELFDDLNASWSKYKVSFQLPSLRVDSFTLPLLEKISEVRKSG  
LTFAVETPLESWQCAINKRVPFEKIAAILREAKAKGFKSAKFYFMVGLPVPERGMREAQE  
IVGYIEQIAELERISIHVNVGTFIPKPHTPFEREALQSEEEALECLQYIRRNLKYRKNVE  
VSYHPPFLSILEGLISRGDESVAADIIFDAYLKGARLDAWDEYINRDLWRGVLADFNKRG  
EGAWQSFLAQKNEKESLPWRKISLKVTSHWLQKEEQKAQEYNLTQICNEKCTIKCGVCD  
HNKIVSNSILNKEKFAEMAILDSPGGKSDILNGSSFDTEIDMAVIKLIADVSKRGA  
VLYPLHDVARSFRTFQISGFQIAFTHGFPNPQKLELSPPLPLGIEGQNEMLLLWINIPK  
NRLGEFESFISESQADILSSLNENLAEGLLIKSLGISRYNADRKRTIGSLLRAAAWKYVF  
ASEELYIKATDILADYSEDFTLVKDDAVGNEISLIETFSGASQKTL SFYKILKNLFAEEK  
PTTNTSESYFRSVERVECYGELEDRGYVRLQDIL\*

>SPBDM4\_v1\_70055|ID:27159513| protein of unknown function [Uncultured spirochete bdmA 4]  
MRGQRDKVTFSPRGVAASFIIVMAALLFSCGLPTSEYL YPPAFESLGGVIRLTHKTENID  
DAASAALFKGYDIYYRIFDSETEASKSYDELSSLTSTTIATVAPAKGYVVLVKFGDTNV  
PLIPVSDNTYNYFYLNLTNDGWTITTSTGTTLFHHVLRDKDDSSSTADFYLSAQYSSDQ  
DYEGDGISSGNSVYIVFFAVAAGVSSSIGTDIYSDPKILEPIAYTPGGS\*

>SPBDM4\_v1\_70056|ID:27159514| putative TPR repeat-containing protein [Uncultured spirochete bdmA 4]  
VSQQEKQPQKDTNVPKKQTEKKTSEKLTNFISVHRILIISIGVAVVLAIAAGVGIYTAVS  
GNIASASSRAMDLADQKLQAWSQETDEQKKADAESLVADLDSIAKKWPRTLAAQRALLR  
KGAILSQKKDYAEAEKVALDAFARNKSYAAPLAELEAAVSAEEAGNTDAALAHYTALTK  
DYLKDNPIAPAALFNLGRLQEGKKDYKAAVTSYNQVISSFGSDWSMLAKNRVIYLSKQ  
LAD\*

>SPBDM4\_v1\_70057|ID:27159515| Transcriptional regulator, NifA subfamily, Fis Family [Uncultured spirochete bdmA 4]  
MISAIDSEKFRTLIDINARLNSSYTDFRSLKKTIVESAARLVGAEEAASLALFDAPTNSLR  
FEIALGPRGAELQGKAIPSSDGIAGWVFNHNSRSIIVNDAAHDFSPAVSKEISYSTNSI  
LAVPLKVRDKTEGVIELINKTSHSLFVGDDLEWVELFAVQASIAFDNAKQYERTEHELVE  
LQHKVQEEQGWPHLVFSSRVMQDRLDLVKRVAPSDASVLILGESGVGKELIAEQLHLNSR  
RNQKPFVRVNCAALPENLLESELFHVKGAFTDAISNREGRFEAADGGTIFLDEIAELPL  
KLQSKLLRVIQKTFERIGSNETIKADVRIVAATNRDIEKLVQNQEFRSDLYYRLNVLPI  
QVPPLRERLDDIPTLAEYFLTKYARETNRGILHFSDSAMECMLSYSWPGNIRELENAVER  
AVLIAGGTLITDDLMIGTKSDAGNERFDGKELKEAAILFKSNYIRAALQNRWNQTETA  
RHLKIQR TYLSRLIKELNILQSKE\*

>SPBDM4\_v1\_70058|ID:27159516| 30S ribosomal protein S1 [Uncultured spirochete bdmA 4]  
MAENKEVEMDVTEPSRDDIQTQLQEYKLSLEGLEEGDLIDGKVVQVAGDTIFIDVGYKS  
EGKLSLLEFGDTPPKAGDIVKVLIRKETHSGDIVISKKKADEKLFWKSIAAFKDHLPV  
EGTITKEVKGGFEVDLGHGLSGFLPLSKADVQRVEKTAELVGIHAEFYLERLYSDKKINI  
ILNRRKLMEEEIERHREAFFQNTQIGD TVKGIVKSFTSFGAFIDLGGFDGLLHINDMSWG  
HVTRPKDFVRKQGEIELKVIRLDPEEKRLNLSLKHFSPPWNSFEEKYHVGDVVKGVKVT  
LTDYGAFIEVEEGIEGLAHISEFSWVKKVRKPEDMLKAGDVVDCMILGYDIPAGKVSGL  
KQVQPNPWD TINERYPSGTRLKRKIVKVTNAGAFIEME EGIDGFLHIDDYSWTQKVNPS  
SVLHEGEEIEVIVLESSPEDRNIRLVGKQLSEDPWRSFAKTYKPGSIVEGTVSSVDFGV  
FVKVPGDIEGLIKQDLVSDRSESYDEALKKYQPDMQVKA VVTDL NPERQKLGLSIRDLV  
QKQQREMSRFIQEDEGEAGYTLGDLLKAKDKEND\*

>SPBDM4\_v1\_70059|ID:27159517|cmk| Cytidylate kinase [Uncultured spirochete bdmA 4]

MKVAIDGPAGCGKSTIARMIADNFGFLYINSGNLYRAVTYLALQEKIGWQDGPGMIALMQ  
RHHFDYLPDGSVDIDGKRLSGELRTPQVDAIVSQVSAIPAIRTEVNAIIRSISEGKNVVS  
EGRDITTVFPDAEVKLYLDASAQIRAERRFKERLAQEASGNLSGASSKAASIEDIRKNI  
EMRDKLDTQKAVGSLKIAKDAEYLDTSDLTIQQVYEKVVYKILRARIAHGRK\*

>SPBDM4\_v1\_70060|ID:27159518| Pseudouridine synthase [Uncultured spirochete bdmA 4]  
MREPEEKLIRLHAFLASAGVASRRACEEMIRQGRVVVNGETANIGQKVKGFEKIEVDGQT  
ITVSAQKSCRYILLNPKGYLSSASDPQGRPCAIDLISESVKERLYNVGRLDQWSSGLLL  
FTNDGDLASKLMHPSSKVEKEYSVQTDAPLPAGFASNFIRGILYEGIRYRASSVKLLAPD  
RALIVLIEGKNREIRRVLHFGLRARILERIRIGPLQDANLAPGQWRDLTEDEVRAKLI  
ANHNRDEGKRQ\*

>SPBDM4\_v1\_70061|ID:27159519| Transcriptional regulator [Uncultured spirochete bdmA 4]  
MNEQMDREAALISAILFLENPISEEKLAKLSGFSEEQVSLLLQRLCTEFDQPVHGFAPT  
RSAGGWILAPKLLFWDQLKDHYGKKNEMKLSRAAMETLAIAYSQPITRAEIEAIRGVNV  
DAMIRLLLRSNLIAELGKRNVPGKPMQYGTTFSEFLKYFKLDSIEDLPKLDEIESARFSKP  
ETPEG\*

>SPBDM4\_v1\_70062|ID:27159520| ScpA/B protein [Uncultured spirochete bdmA 4]  
MMQEFDRDFSKEQIAILSNGRTFHLSDFEGLDLLLYLIKKNEMNIYDIHLSITEQFLE  
CLNSDSSANLDEISEFYQMAATLLYIKSRLLPHSDEDLEEIEDPRRTLIDQLIEYHRFK  
KLSELMEQREMEVEWFVERSTSQRPLPFVDNPDDDPWIPADSWDLLRTFASMIRHFNSER  
IIDLYEEVSINEKIVLINELLSRKGSFRFDDLIAKHASALDLACAFLAVLDATKNRIIRI  
RQHRLFGDILIPYAEAGDPHE\*

>SPBDM4\_v1\_70063|ID:27159521|folK| 2-amino-4-hydroxy-6-hydroxymethylidihydropteridine pyrophosphokinase  
[Uncultured spirochete bdmA 4]  
MMEKVWLGSGSNKGDSPAILRAVLNELDTSLSECRHSGLWRSRARYYEDQEDFFNMAVCG  
MTDLNPRELLKINEIETRFGRNRSKEIKKGPRITIDIDILLYGQKIITEPDLIIPHPGLA  
ERKFALLPPELDYELCHPGMGISIKQLAASLPPQGIYPVNDCRYDGPYSE\*

>SPBDM4\_v1\_70064|ID:27159522|recA| DNA strand exchange and recombination protein with protease and nuclease  
activity [Uncultured spirochete bdmA 4]  
MAKRQTRTAEPPVNEQNSKFVEGGSSISRQGNIDPEVQREREKLEKALEAARLQIEKQFG  
QGSLMKGAAHAIARGIEVISSGSILLDEALGIGGYPRGRIIEIYGPESSGKTTLALHAIA  
EAQKKGGIAAFIDAHAHALDPIYARNLGVDTNELYISQPDNGEQALDITESLIRSGAVDII  
VIDSVAALTPQAEIEGEMGD SHVGLQARLMSQALRKL LAGTLSKSKTILIFINQIRMKIGV  
MFGNPETTTGGNALKFYASVRLEVRRIETIEGGHDEEAIGNKVRVKVVKVKNKVAPPFRKAE  
LEIIFGKGISWSASLLDAAVKCNIEKKGAWYTSGSEKIGQGRENAYLEQFPPEAKKI  
EAQVREILFNPDKSKAAEASLGKETQGLSAESSFDQEPAQDESNADNSRIRAEDLF\*

>SPBDM4\_v1\_70065|ID:27159523| conserved membrane protein of unknown function [Uncultured spirochete bdmA  
4]  
MSRIKAKDLRPLSFLGFRFLFGKPVQGQRYAFHHMRHSTFWGAVLGISVSIVPLYIVLFFV  
SNGMIQGITDRYLETKTSHLQLSLPFLNLSSETRKKIQQDIARLEDVSIASFEVDGIGLAA  
SPNGSTSAQIRGLDPSIIKDEGFKKFIQIDGGTIFPEKQNEAVLGRYLARALGVNVGDSV  
SLITLRNADEAQMLPKLSIFRVAGIVSSGYRELDANWFIIQSEAAALRLLNPSTAYAFIGI  
KTKHPYGSGLDSLASEITHKISQSDIPGAQGIGIRTWRDIERSLFFASFSSTKSVLILIMA  
IAIIVASINLASALTTYVIEHRTEIAILRSFGVSPRQTATIFLLGGAVTGTGCIAGSAV  
GIFISFYVNQILRGAQA AVNFISKLLAPASHPV TLLNPDYYLEHIPISINWNYIILIGI  
GFVVSALVSLVPAIKSSHIAPAELIRHEQ\*

>SPBDM4\_v1\_70066|ID:27159524|lolD| outer membrane-specific lipoprotein transporter subunit ; ATP-binding  
component of ABC superfamily [Uncultured spirochete bdmA 4]  
VNEPIIECRDLIKTFSSSAEVLHILDHANFSLEKGNICTILGPSGSGKSTFLAILGSLER  
FDSGTVRVGGYDLHTLPEKSLFMFRRNVVGFVFQFHLLNDFTALENVALPRYMAGISRT  
DSWERATRLDLVGLKNRAHHYPSQLSGGERQRVAIARALINDPPIVLADEPTGNLDTAS  
SEEVRSLQLRLPEATNTTLVLVTHDSELATIGNISYLLKGGNFECLA\*

>SPBDM4\_v1\_70067|ID:27159525| putative Releasing system transmembrane [Uncultured spirochete bdmA 4]  
MTRTADDQKNTRFLPLLHAIARWSMTRKKTSHQTGLLFAALGIAAGIVALIVVMSVMNGF  
QRQYIDSLETTSFHIRITPEKNTDLPALSQSLHQNPLVRSVMPFMETNLLAEGLGNRQN

VVRVMWIRPQDLASDSGFCCKTLHIPASLAEKSLGSEAGRILGNSEGSTVTLRGA  
LVSPDEGIQQYEIDAPISGFFRSGYYELDAGLAIISREKIAGLSLASAPLVLGVKLNPE  
QVDAFIKTLSHAEGIKSIESWRDYNRSFFSALRTEKIVMFLLSIIFAVVAINIHYSMRR  
TITRKARDLAILSAFGTSQRSISTIFMLEGLIVGVVGAVVGIAVGIPIAQNVDDHIINGAI  
TLLEGVISLFYRIGIVKNIPDLRLFSPTVFYIDGIPSRVFASDIALIAAFVIFPAIAVY  
LAYRRFKNASPLEVLRSE\*

>SPBDM4\_v1\_70068|ID:27159526|ftsY| Signal recognition particle receptor FtsY [Uncultured spirochete bdmA 4]  
MKFAEKIKALFRRNQLSDEVFEELADLLIEGDIGASLAFEVVEALKNSCKKEGISNTEEA  
KKKLDILRPYIKTANFGLDPDKLNIVLILGVNGVGKTTSCANLAFWAQKTSPAKPVILA  
AGDTFRAAAIEQLKIHGERLGVVVAAQQHGSDPGAVLWDAIDAARTGNAQLVIADTAGRM  
HTRADLLKELEKLDVVNQKAGNVNYRKLVLDTATTGQNAMRQAEIFHGAVKVDGVIMTK  
YDSSSKGGTIIAVSRQFGLSTLFLGTGERYENFEPFDLNVYLDDDFVGE\*

>SPBDM4\_v1\_70069|ID:27159527| protein of unknown function [Uncultured spirochete bdmA 4]  
MNYVAAQDASIVRNNPKNIAVCFPVRADEPSLSQFSSQAPDEKLSWQFLEAGLAMPQSLP  
NGSPYPEAVSLAKLMEESLRARAEIGQIISIDTDLKALRQGEGEAPIFQAAALQNADVA  
VFMMYIIQSDVQFEALAVTKTGEGASYFSGPRSIFYLSDATNEAVTTFIARKILVPAIQ  
IPSDSLSSGQSSTLPSILPAIEPWKDRPKYEQANSRLKIAIGGVAVGLSASFICAGLWQT  
YQEAERYNTAFESA VTASGIATGASVAVTVAFTSAIWNVVLMLQASH\*

>SPBDM4\_v1\_70070|ID:27159528| Peptide chain release factor 2 (fragment) [Uncultured spirochete bdmA 4]  
MYELVREEDRQDMEGDLLASLHDIQARFDKALVIELLSGEADGND AFLTIHAGSGGTEAC  
DWASMLYRMYLRWAERHDFK VETIDFLEAEGGIKSVTIQVSGEYAYGYLKGETGVHRLVR  
ISPFANARRHTSFASVSVMPVLDDSIIDIRPEDIRIDTYRAGGAGGQKVNKTDSAVRI  
THLATGIVVTCQNERSQYKNKDVAMSILKSRLYEYKVERDKETAKFAGEKKEIAWGSQI  
RSYVFQPYTMVKDHRNKFSVGNVQAVMDGEIDPFIEAYLHWQWKGGTTVEEDEDI\*

>SPBDM4\_v1\_70071|ID:27159529| Aldose 1-epimerase [Uncultured spirochete bdmA 4]  
MSASESKIETKPFGLSNGDEVSLFILKAGDFCATFTNWGATWTSFVLPDKKQSDILL  
GFSTLSGYVGKHPFLGSTVGRFANRIGKARFAMDGKEYRLWANNGQNHLHGRRGFDKYL  
WKYELSAFKGSPAIQFSRTSPDGEEGYPGTLSVELTVNLSESGSLKRLRYLAKTDAKTPVN  
LTNHA YFNLAGEGKGTILDHELQMHASSYLPVDRELIPTGKEAPVQGTALDFRRTKVICE  
DIAQANGGYDFCYIIDKEFLPLKPFATVREAHTGRCMTVATTLPAVQFYTGNNLAGIAGK  
RGSTYDKYAGLCLETEMYLDSPNRPNFSPFLMPGETWEHETIYSFSINK\*

>SPBDM4\_v1\_70072|ID:27159530| Oxidoreductase [Uncultured spirochete bdmA 4]  
MKQETNHGEVAFVTGATSGLGLAIAKSLANAGYTVYAGARRQAPSEMPANFIYVQTDVTS  
DES VQRSAHHVLFQEGHVDLLVCAAGSGISGAIEDIPVDQAKSQFDVNFVGVVVRVQAF  
PALRQQKGGKIIIGSIAGKTGMPFQAYYSASKFALEGFVESLRYEVRAFNIACIVEPG  
DFRTGFTGARQKIVPDNSFYHDKFEKVIAVQEHDETHGVDPTVAGKRILRLASSRRLPAR  
ITIGPMFERFAVWVRRIPDHWF EAFYRIYYKL\*

>SPBDM4\_v1\_70073|ID:27159531|cmk| Cytidylate kinase [Uncultured spirochete bdmA 4]  
MWSKNTMGIIAISGKSGCGNTTVLRLVAEKLGFEPVNYTFRSMAIDMGISFEELLKRAQE  
SLEYDRRLDEHQAMLARKGNTVIGSRLAIWMVPEADLKVYLKASHAVRVQRIHAREGGDM  
ASIERFTRERDAKDRDRYLTLYNIDIDDISCAHLVIDTERWSASKVAEIIADAYNIAK\*

>SPBDM4\_v1\_70074|ID:27159532| conserved protein of unknown function [Uncultured spirochete bdmA 4]  
MKSMTGFAHHTISENGIQGTITLKS YNNRFLDISISLPPSASGIEPYIRDFLGSRISRGK  
IECTFRLRKPEASLEDIELHFQSAKILSEQLRSLAEACQLDDRPSLEVLTFRPGIVEMNT  
EIDEASLWQVLLPALEETWREFEESRLREGLATQANIMSQMERLKS KLAEIEAQADTLEQ  
LVHEQIVARFRDLLAEKYDESRVLQEVAVQLVRLTINEEIERLKAHFEAFQLISAQASCG  
KKLDFLCQEMNREVENTIGSKNMLVTISHAVVEMKDALENIREQLRNVE\*

>SPBDM4\_v1\_70075|ID:27159533|murC| UDP-N-acetylmuramate--L-alanine ligase [Uncultured spirochete bdmA 4]  
METIEFPGILDGLHIHLVGAKGTGMTALAEILHRRGAFLTGSADVADVFYTD SILHSLNIQ  
LFENFEAQHLPRNTDLVIYSAAYSREANPELRAAVQRNIPIFSYPQALGALSLSRSAGI  
AGVHGKTTTALAGLLMEALSMPATVLAGSAISNFNGRCTLIQNTYFIAETCEYRKHFL  
NFKPSWIVLTSVESDHQDYFPTYESIRDAFVEYVLTLPAGGVLI FCADQKGAVEVADIVL  
QKRKDIQFVEYGFLAKGKYKIQDFQISAGKNTFVVG DAPVPIELHVPGRHLVLDVA AIA  
LADSLFEAETSRTFGAGEWRKIAVALSLFRGSKRRSEIIGEFENILILDDYGHHTAIKT

TIEGIKKFWPHRRLVVDVDFMSHTYSRTIALQDDFVESLDEADSIVMHKIYSSAREQPIRGF  
DGRALFQKLCERRPELPIEIVPASKENASANPKNAPLKPNGGFAAYSEEPMDARDTLE  
ILQAGDIFLTMGAGDNWKLGKAIKAEKLCESHTSQSKKTEEHP\*

>SPBDM4\_v1\_70076|ID:27159534| putative 4-alpha-glucanotransferase [Uncultured spirochete bdmA 4]

MQSFRVVMYNNLPYNASNALYEQEQGAWRPFLSGLYKFLSIKSIHFSGAIFSWLEK  
NHPEYMYLLTEMVRRGQIELLGGGFYNPIASLISTQDMTGQIEALSAFIRKTFGKRPSGA  
WLYEYAWTASLPAILQNSKIQYTFPAQYCMCLYPKDIPCFPFASEDHRKIISLFPAFES  
RASAGIFEPYEKTLKLLQQAYPQCNTYVIMADGHEIAGSWEESGLESPDVLFFERTFAWFQ  
KNCLEYDTVTAAQLNKTLKSTSTVYFSQCYSERYKDYCQGTIKQVAMNNPEYIQISKQSV  
LDHPLVYALYQKLNFBVSTMTGLFRGDKSRKRASLDDIWRAQSGDLYWIGPSGGILLPEAR  
LAAAYASLIEAEKTIRQNRFHHLYSFDDLDFDGVKEALFRSSVYTCYLRSQTASVSEFDSL  
KTGINYACGWNAVQCSTGCFRDSIKEEGGFELFAESEGWNLINAKETMIVAFSHDFI  
GKIHNQISLACRKNYRFENDFFSIDYELVNKSSNALSFRFCTESDIAMPTLEEHGIV  
FKHRQKQSLDVHTVFSIDSIDGFELSESHGTEKLLIRADMPFSLMGPSPNLLQKPSKHQSN  
SSKDPSESVIFEGFSMKLGWDFALPAEGTTFFSLSIHLEY\*

>SPBDM4\_v1\_70077|ID:27159535| Acid phosphatase/vanadium-dependent haloperoxidase related protein [Uncultured spirochete bdmA 4]

VEIQSHSFVSLFSNPFLSGTLSIFLAQVIKALLTVLKRRKLQAKEIAFIMLWKTGGMPS  
SHSALVVSLASIAFVEGFDSLFIVSFFLSLIVIRDAVGVRRSAGLQSRALNLLGKHVSE  
RLDIPFTPVKEIHGHRWQEAIVGSLGLVAVLICWRFIF\*

>SPBDM4\_v1\_70078|ID:27159536| putative Ribosomal large subunit pseudouridine synthase C [Uncultured spirochete bdmA 4]

MVLGEDDDGRRADRIVRKALRNVPSTIYRLFRQGNVHVENHSIKPEDRLKKGEEIKISL  
PEALIAAKTGEAPDAPPRAISALKSEFNGLLNHEMPQIVWQNEHLIAFHKPRGMLVHDGE  
TSLDAYALSVLDRDQLPHSVSFPGLHRLDRNTSGIIMFSKTRIGAEEKFTAIRNRQIRK  
FYISIVQGDALPELLIQDTLLRDTQKHVSIIDKKGKASLYIVPLIKNGRYSLLLIELHT  
GITHQIRAQLAAHGLPLAGDSKYGGQKTSNIRYYFLHSYCLYLRSQLFGDMPSKIIDPLP  
EDFYTMIMTLFDTNPEKLEAGIFQVMKQLLEN\*

>SPBDM4\_v1\_70079|ID:27159537|hflK| Protein HflK [Uncultured spirochete bdmA 4]

MANTAIFKKPKFNLKWPVLIIVIAVIFLSTSFVVDQTEKAVITTFGKYTKTVGA  
GLHYKLPFGIQA YIVKTQVIQTETFGFRTIKPGVVYQYSSQKYPNESTMLTGDLNIVDV  
EWIIQYRITNPEAWLFNVTDREKTIRDTSQSVLNTLIGDRITLGVIGPDRQNIQDSAVSM  
MNDLFTKYELGIIVTQVQLQNIVPPEGVQA AFEDVNKAIQDMNRLINEGREAYNAEIPKV  
QGQAEQTIEIAQGYAAERVNEARGDASRFDAVYAEYRKAPEITKKRLYYEMMEEIFQGQE  
NIDLIDKSLQNVLPKINITQTSSTQEASK\*

>SPBDM4\_v1\_70080|ID:27159538|hflC| Protein HflC [Uncultured spirochete bdmA 4]

MKKIPTIILIVVLA VVFIVAFGPLFIVQEGEQAVVVRFGKIVAQYTEAGLKWRSFVDT  
VIKYPKMLMSWDGESQRIPTKENQFIYVDTTARWKIVDPVKFYESVNTLESAYGKLDLDDVI  
DSAVRTVISSNYLREAVRSSDEILNASKVETFTQTEVENSSTLQQLAITPTQYKIEKGR  
RELADEMKILVANIVPTFGIEVVDILPRQIKYSDELTESVYQRMKERNQIAQAFRSYGE  
GKKAEWLGKLENEKRSLSSAYAKGESIKGKADAEASKIYADSFGRDPSFFFEFWKAIESY  
RKTMPAFNKTLSTGMDYFKYLYSPSGR\*

>SPBDM4\_v1\_70081|ID:27159539| putative Metallophosphoesterase, Calcineurin-like family [Uncultured spirochete bdmA 4]

MADMFLALADIHGETEMLERILKENPHTKGFVAGDLTNGFKEKEAERIISVFSRVATNA  
ALFFVAGNCDTSGARHFFEKQPGYLEQKCFTLAMGRGEQKTPDEIIRIIGCGGLRHTGL  
TPFEISDKELESGLRAYEHCVTEEHKNAIPLKATTHPLIVLTHTPPRDSFADMRHMKHL  
GSAAFASMLYEYELLWICGHIHESRGAQWEDRTL VVNPGPAAHGSYAQILVEQKPRGLH  
AVAEALRAL\*

>SPBDM4\_v1\_70082|ID:27159540|tyrS| Tyrosine--tRNA ligase [Uncultured spirochete bdmA 4]

MNSALKVLQERGFVQQCTDFEGLSGLMDEGPVTFYIGVDPTGPSLHIGHMVPFFALRHLK  
DAGHRGVALLGGGTARIGDPSGKTETRKLISYEDIDANTERFVKQLDRFVGFDFGVHAFIA  
NNKEWLANLNYIEFLRDIGRHFSVNRMLSFEAYRIRMETGLSFIEFNYQLLQSYDFLQLF  
KRYNCRQLQIGGDDQWGNIVSGIELIRRIEGAECYGLTFPLVTTGDGKMKMGKTEKALFLD

PEMTSPYEFFQYFRNVSDADVERFLRMFTFLPMEECKHLGSMKDAALNEAKERLAWEVTA  
LIHGKEEADKALTAARAAFRGDGDATKLPTTQIERARLETGIGVLDLFIESGLAPSKNEA  
RRLIQGGASVNGKKIEDEKQIFSDADLNDGAMMLRAGKKRVARIVLKTE\*

>SPBDM4\_v1\_70083|ID:27159541| Histone family protein DNA-binding protein [Uncultured spirochete bdmA 4]  
MPSTGKPLTKVEIINALAKTTGFTKKDVGLILDEFKAYSEAKKNKFTLPGIAIMKIV  
HRKAKVGRNPATGQQITIPARNVIKINVAKPKDAVLGK\*

>SPBDM4\_v1\_70084|ID:27159542|glyQS| Glycine--tRNA ligase [Uncultured spirochete bdmA 4]  
MADTAVTMDKIVSLAKRRGFVQSSSEIYGGLSGAWDYGPQGIELKNRIARFWWKEMTQLH  
DNIVGIDAAILMHPMVWHASGHVENFTDPLVDCKKCKTRFRADQIPPENLAAKKCEPCGG  
ELTETRKFNLMFKTTLGPVEDESLVYLRPETAQGIYVNFKNVQSNRMKIPFGIAQIGK  
AFRNEIVTKNFIFRTCEFEQMEMQFFVKPGTDMWFEYWREQRWNYQKLGIDMNKLRWH  
RHGPDELAHYAKDAYDIEFEFPMGFKELEGVHNRSDYDLRHHQQFSGKDLQYIDQDNGNE  
RYIPNIIETSAGLTRQLLMLLDCDSYEEQKVADKGNDDWRTVLHFHPAVAPITVAVLPLM  
KKDGLAELAQEIRAELKEDFVTDYDQSGAIGRRYRRQDEVGTPFCVTIDYQTKEDSTFTI  
RDRDSMLQERVPRMRRISEYIRHKIKDYKRPERRL\*

>SPBDM4\_v1\_70085|ID:27159543|glnS| fragment of glutaminyl-tRNA synthetase (part 2) [Uncultured spirochete  
bdmA 4]  
MPTIAGMRRRGYSSAGIRDFLGRIGIAKTDSMVDIQLLEHCIREDLNAHARRYMVVLNPV  
KLCIENWPKGQVEWLDAVNNPEDPGAGTRKIPFSGLYIDHDDFREVPKYYRLYPENQ  
VRLRYGYIVTCTGYEKDSESEGITLIKCRYDPATRGGDAPDNRKVKGTIHWVSAEHSVPF  
TARLYDHLFEAERPMEAPEGKTFDLNLSHDLSLTVKNAEAPEVAEIEVGTTVQFERMGY  
FCKDPDSTDSGAVFNRTVTLKDTWAKLEKLEKKA\*

>SPBDM4\_v1\_70086|ID:27159544|glnS| fragment of glutaminyl-tRNA synthetase (part 1) [Uncultured spirochete  
bdmA 4]  
MSESNVKTEYLDIFIREAVAEDLRTGRFKEVHTRFPPEPNGWLHIGHAKALFVDFGVAQDF  
GGKCNLRMDDTNPEKEDMEYVEAIQRDIKWLGFDWEDRLFFASDYETLYELACKLIRKG  
LAYVDDLDEEQIKEYRGTNVPDKNNITYTPPGRNSPWRDRSPEENLDFVRRMRNGEFPDG  
AKTLRAKIDMAHPNLLMRDPVMYRIRREPHYRTGTKWCIYPMYDFAHPLSDAIE\*

>SPBDM4\_v1\_70087|ID:27159545|gltX| Glutamate--tRNA ligase [Uncultured spirochete bdmA 4]  
MSVRVRYAPSPTGNQHIGSVRTALINYLFAKSQGGSFILRLEDTRARYSPEYVQNL YDT  
FKWLGIFYWDEGPDVGGPVGYPYVQSERFDLYRKYAEELVKMDKAYYCFCDSERLEKLRQEQ  
IAAKKDEIGYDRHCRSISKEERERNIAEGKSYVIRLKIPLDGTTFVHDSLLGRIEWKNE  
ISPDPVLLKSDGFPTYHLANVIDDHLMGITHVMRAQEWIPSAPLHKVMYDAFGWKMPELC  
HLPMLVGLQDGHKLSKRHGATAVNEFRKAGYLPEALINYIALLGCSYEDGRDIYSLEELVK  
LFKIERLNKAPAVFDYQKLEWFGQYIRQKSDQDLSALVRPYFIEAGLRKEDPQKDQME  
LAAMPLVKERLFLTDAPAIMAYLYKRELPVETYLPPKADAHDAAFLTEDKKILQEF  
GLDDIPFVEEKFRERAIEIGKKLGDLLMPLRVAITYTRVSPPLFESMKILGLGECLERIE  
KAIQHLEGA\*

>SPBDM4\_v1\_70088|ID:27159546| membrane protein of unknown function [Uncultured spirochete bdmA 4]  
MKSESGPEVESGFLRAFKLFQKIAEIAGVVLWL VVTVLMLILGSETWRS AFEICSIGLLG  
ISLFNAISMVAFSLKRRERFVGHFLILVALILIAVIALALS LFMGIRLH\*

>SPBDM4\_v1\_70089|ID:27159547| Histidine triad (HIT) protein [Uncultured spirochete bdmA 4]  
MEYLFSFNKIA YLKGKRPKGCILCLVRDGS EDVEKLIVHQTEL FIVSLNLYPYNPGHMII  
FPKRHITDIREYTQEEKELDEL VPECLNALDRYGNPSAFNIGYNMGLSGGASIEHLHLH  
IIPRYPREIGIAELVGGSRVLVQDPKDTLVQLKEIFRTLVAEDVNPGS\*

>SPBDM4\_v1\_70090|ID:27159548| Thiamine diphosphokinase [Uncultured spirochete bdmA 4]  
MKALIVTGGDCPSHEIIHMLSEHADVFVIAADSGLEACLSAQIEPDFVVGDLDSVQQVSL  
RVSRDKILQFPEDKDYTDTELA IETARNHGAQDIVLAGGGAGRLDHL LAVRALFERKNPV  
QEWHTAQESAFFVSARHRLHFATPVPVIVSVFPLSKGASGMHSRGLKWPLDGLEWDCGHF  
GVSNKSVESEITIIAGQEPILVILPLGTRVDIFSDG\*

>SPBDM4\_v1\_70091|ID:27159549| tRNA adenylyltransferase/tRNA cytidylyltransferase [Uncultured spirochete  
bdmA 4]  
MHFLVDTIMSLRYTSKPGMRIPNIDPEL RKIADRLIQNGKKA YLVGGAVRDAFLKRPVTD  
FDIATDATPWECLQLFPRAIPTGVKHGTITVIPRSHKYKIEITFRTEGTYTDGRHPDNV

AFIADIFQDLSRRDFTINAMAFDLAHTTFLDPFEGKRDLVRRRIIRAVGNPLDRFHEDGLR  
TIRAIRFATQLGFVIEPATLNAIAECSDSLKISAERIRDEFKILGAQKPSVGLQLLLD  
TGTEAIPELLVCKGVPEPNHGQQDVLAHLLATVDAVIPDNLSEEELLVRLAALFHDI  
GKPVICYKNDNDSISFYKHEIESEKITRKTLLQQLKYPNTVIEKVCHLVRHHMFNYEPGWD  
AAVRRFVARVGLQSVKDLFALRLADTIATAGGPFSPVNVSELQSRIDHIVEANQALTKD  
LAVNGDDLAALGIPRTREMGVLLSELDAEALEDPSLNTKEKMLEIAKAKYFSLKR\*  
>SPBDM4\_v1\_70092|ID:27159550|rnc| Ribonuclease 3 [Uncultured spirochete bdmA 4]  
VKHSSLSQPSGSDITASRRTSLQQFQQLVVISFHNIVLLDIAFTHSSYVNEAHPTRNDNE  
RLEFLGDSVLGVCISHILYEFKPKREGELARMKSVLVSESSLSAVASTLSLADYLLLGK  
GEENSGGRQKPAILADAAEALLGAYYLDKGLEAAKALVLRFLADKIEALASTSGKDFKSI  
IQEYAQKRGIELPNYKIIKIEGLEHARHFHISCVLDGETFGPLEGHTKKEAEQRAARQAF  
EALHAREGETARILDAAIGTNSTGASALD\*  
>SPBDM4\_v1\_70093|ID:27159551|acpP| acyl carrier protein (ACP) [Uncultured spirochete bdmA 4]  
MDELFEKIKKIIAEKLEVDESKITMDASFRQDLGADSLDITYELVYGIEEELGIQIPDEKA  
NEFETVKDAYEFIKTQVK\*  
>SPBDM4\_v1\_70094|ID:27159552|coaD| Phosphopantetheine adenylyltransferase [Uncultured spirochete bdmA 4]  
MPNAVAFAGSFDPPPTTGHLDVIESALSIFDTLYVVVAHNPEKEGLFSIDERIEMLNAMNAF  
GERVQVCTWEGLVTDFAERERHCMVLVRGLRNASELPYESTMAYMNRRLAPEIRTVFFLYD  
AKHVDISSLVRDLVAYKKLPDDIVPEAAAKVLRKILKKRGQPLS\*  
>SPBDM4\_v1\_70095|ID:27159553|lnt| Apolipoprotein N-acyltransferase [Uncultured spirochete bdmA 4]  
VFVIYYFIMRENGVKAREYAILASRDIGQPPKPFLLRLSWAFFSALLFALAQPNELFLYG  
NWLLGLFCLVPLYLALEDTQKIGEASLIGALFGATNHALTSYWLFFYKNFAFWTLGTTTI  
AYAVVYAAAIMYGFMLKHAGIARPVVFALAWAAFEYAKSTGFLGYPWGLLPYSFTNVAI  
MLQTADIWGVYGISAFALCSASIAELFPQWPQKPGQNRMLRWVTISAVYGLILLAYG  
ANAMSHPVVPRSTVRLLLCQQNTDPWISGENAALESNIRLAKDALKSNEEAGGAKPDLMV  
FSESSLQRPFKERYAWFEKNPPDSPLLPFLQKTDIPLLTGLPVVINWDTYEASNSVGLIY  
PSGILGETYAKMHPVPFAEAIPWFESWFRFTVQKVIGLERGWVMGEKPVIFSLTLQNRD  
AVCSDIRTLPSVKFAAPICFEDAFAGQCRGFVLRGADLLINLTNDSWSRTLSAQIQHYAV  
ARFRAIESRKALVRSTNAGVTCVVGADGRNLVELPQFKAESIIVDVPLYASPLTFYMRLG  
DWFAWTCVGVFVGLLFWAILREKKIV\*  
>SPBDM4\_v1\_70096|ID:27159554| protein of unknown function [Uncultured spirochete bdmA 4]  
LSISNYINTEYINKLEDVCDVVQYREHPAFDAVPFVGSIKKHPYDQEKCLVLLLRKQGRM  
PWFKEGELIELKTRDVQALDELPSIDLVGTIINVFRIWVRRRAIAVRFEPFEVTDEEFR  
PFDADSISSRLLSKRDR\*  
>SPBDM4\_v1\_70097|ID:27159555| Radical SAM domain protein (fragment) [Uncultured spirochete bdmA 4]  
MEGSNIARYWRLENQRIQCLLCPHACILSNGERGHGCNARENRGDSMVLPNYAWISSIAI  
DPVEKKPLRRFMPNTWTYSVGFWHCTMDCPFCQNWIEIAHPSRAEKDIVEPQKLIELALAS  
GCPSVSFTYSEPTLHIEYAAEAMQIAHRYGLKTLVTNGNVLPEPARDILLHTDATNVDL  
KTADPTIYRNTLGGDLKVVQKFIQIAAELCHVEVTS LAVPGVLDSPRQIEEISRFLASVS  
TEIPLHITRYHPAWKFSKASLPLEMLHEMGETAKEHLKYVYSYC\*  
>SPBDM4\_v1\_70098|ID:27159556| protein of unknown function [Uncultured spirochete bdmA 4]  
MSIRIAEFYLLTDFAYFGIVSIADCTVGVAAQVVECQTVDLVVVGSIPITHPSPTPLLGF  
TKT\*  
>SPBDM4\_v1\_70099|ID:27159558| protein of unknown function [Uncultured spirochete bdmA 4]  
LHGGCSSGGRVPDCGSGCRGFDPHHPPEPDTTFRFRDKNLNAFVAQLDRATDFESVGRRF  
ESCRTHGFYIGPLAQLAEQQTLNLRVEGSKPSRLIKSGLKNVGLLDEKALFRLVCASHPR  
IARVVERQTRQT\*  
>SPBDM4\_v1\_70100|ID:27159557| conserved protein of unknown function [Uncultured spirochete bdmA 4]  
MRPAGLEPAAYGFVRRSIQLSYERVQVFVPPKPSGVGLGWVMGIEPTTTRSTVWHSTT\*  
>SPBDM4\_v1\_70101|ID:27159559|tig| Trigger factor [Uncultured spirochete bdmA 4]  
MEIAEKKIEEELSRVRMTLTPARDVHAEYAAMMNEYAKDARIDGFRKGHVPVSVLERK  
FGPSLKTEAMGRVIEKAVETGLKDVARQPLA YEPPALDGEPPFELDSDFIFSPTYDAYPS  
FDLPSLDGIEIEVPIVAIADEDVERELEDIRQRNAIVVEKDGPAETGDIVTADFVEIAED  
GSEVSGTARQDFSFELGKNLNVYKFDDEIVGLKTGDEKTFKTFPADFEYSEYASKTVTI

KVKVTKVKRQDLPALDDELAQDVSEKYKTLEDLKA AVRSQLAESLEARLRRTKENAIIIDE  
LLKRTNVSIPQSM LAELAMRWESLKRQMGVDNDERLDMLLSISGKTKEQLLQEWKPLAE  
KALSSRILLDKLIEAGAYSATDEEVDAEIVKEAAHTTMSPAEIKTEYEKHHGTIEYIKDDI  
KTRKFFDAVLSSASVKEAASVSYLDFMKEND\*

>SPBDM4\_v1\_70102|ID:27159560|clpP| proteolytic subunit of ClpA-ClpP and ClpX-ClpP ATP-dependent serine proteases [Uncultured spirochete bdmA 4]

MSEHMSNLVPIVIEQTGIGERSYDIYSRLLKDRIVFIDGEINDLTADLVIAQLLFLESQD  
PSRDISIYINSPGGMVTAGLAIYDTIQYIKPDVQTICIGQASSMAALLLACGTHGKRAAL  
PSSRILIHQPWGGVSGQASDISLQAREIIRLKKLTIDYFALHSGQPLEKVAQDMERDFYM  
SSQEALYGIIDTIMEPRKHGKK\*

>SPBDM4\_v1\_70103|ID:27159561|clpX| ATPase and specificity subunit of ClpX-ClpP ATP-dependent serine protease [Uncultured spirochete bdmA 4]

MARNKQFDLEQETFCFCGKSSSYVRKMIAGPGVNICDECVRICSQILDEEEQKVTLDFL  
TEIPKPKDIKEFLDMYVIGQEYAKRVLSVAVYNHYKRLVHKVSAPSPDIEIEKSNVLLMG  
PTGSGKTLARTLARKLKVPFAIADATTLTEAGYVGEDVENILLKLIQNAGGNIQAAERG  
IVYIDEIDKISRKSENPSITRDVSGEGVQQALLKIIEGTTANVPPQGGRKHPNQEYLRID  
TTNILFICGGAFIGLDKIIESRVAVHPMGFGADV KAKHEKNLGQLYAEMQPDDLKIFGLI  
PEFVGRLLPIKVALDDLSKEELKRIILEPRNALLKQYKASMQLDNVELEFDEAAVDAIAEK  
AIAQKTGARGLRRAIVEKIMIDLMYSLPSDSNVKKVVLTRDAVEGKGCSCIEYRQKTA\*

>SPBDM4\_v1\_70104|ID:27159562|thiB| Thiamine-binding periplasmic protein [Uncultured spirochete bdmA 4]

MMRTRQVIAIFLLVGALFIPNKLWAQSNPASAE LVIW TYDSFISEWGPAAQIAEAFQKA  
YGTKLRFVSKGDGALLSALLDSTKRPSADIIIGLDDRQLEKALQSGLFVPLSLKNLGD I  
QKNLLLDSTNRLVPDFGQFVFMWDSQSGIEPPRSLEDLTKPLYRKRIIIMDPRTSTPGL  
GFLAWTEAVYRDTWENYWKRLSPSVLAMTPSWDTGYGLFTKGEAPLVLSYSTDPAYHKAY  
ENTERYKALQFAEGHPMQIEFAGVLASSPNRELAQKFVDFLLSAECQAFLPETQWMFPSN  
MNAKLPASFSVSKYPALTA KVGD MERDPSEANILISNP\*

>SPBDM4\_v1\_70105|ID:27159563| putative ABC-type transporter, integral membrane subunit [Uncultured spirochete bdmA 4]

MNGENMTRRTSLFLYGALCVILIFSMAPLVAFLKIALSSLWDANKSLGAAGTISSFLSRI  
PVSTIVRSLKFTLSQSLASTLLAIAIGLPGAWFAARFRFAGRKALLALAAVPFCFPPIV  
ILAFILYYGKEGFLSSVISWFFGPRKQYQGFLYSFWGLVMVHAFYNFPIAVHQISALWIR  
IPDTQMEAAKTLGAGKLFKAFRTGVLPWLLPGIAQAAGLIFLYCFFSFTTVLVFGGRTGTT  
IEVEIYQALRYQSNYPLALTF SVIETFFALLGILMLTHIQGRTRRSLRDFGRTRELTAPK  
GIQRFFIIYGIFILIFFIGPLMSIAIEAFKVPSSMGGTTKFGFGNFERLIKGFQAPLLG  
AILSTIKLSGSAALIAIAGIIASLALFFAEKSNKNRAVPRTIEVLQWLPMAVSSAIFAY  
GWLFLSTNRVASTALVAAQAVIAWPFVSRAVHASLRAIDPRIEAAKTLGASPFRAFMTV  
ELRTLPSIAAAAAFAFSITAGDVNVPLMLGMGEVETPLLLYRLTAA YRFNEACAAGLV  
LGLMTGIVFLLKEKVIDVA\*

>SPBDM4\_v1\_70106|ID:27159564| putative Sulfate-transporting ATPase [Uncultured spirochete bdmA 4]

MSLEVKDLLVVRGTFTLEANFSLERGRVLLGPGSGCKTTLRAIAGLEAIQRGKITLD  
GARIDNLPTEKRHMGFVFDLALFEQMCVRDNIGYSLMIRHENK KYIHEKVMLLAQRFKI  
EHLNRYPSELSSGERQRFVAFARALASEPSLILLDEPLSALDAPLRREMRRFIRLQLAEG  
HLTAIHVTHDVEEAVDLADEIIVMRDGRMIGHGTIEDLEKRPGSGWLARFMNLGLVLPVK  
NICPAGASGALEVETSAGTLMYMAPKINVNTRHLSKNKVSLYAPLNAIDIAGDLGTATIR  
ARIVRHRSASNAKLVLMFPDVENYYFEFPLKNRDSNISPEGTDIGISINTSLCQLLPE  
DPLVFDNKANTSNSLQEPRLR\*

>SPBDM4\_v1\_70107|ID:27159565| putative Shikimate kinase [Uncultured spirochete bdmA 4]

MKIAFIGMMGSGKTELGRMLAAHYGVHFFDLHDVIEEQYQMKIANLFRDSGEHYFRDIEE  
NSLQMLAKGDVPMILGCGGGVLRDSNRLTLKKYFITVWLDVPLPELQRRLSAEREYRPL  
LSSDNWAVDLKNIFQQRKLYRDTAIIQYTWQQNQSLEESA EIIKLLTDAKKAKIIMDD  
S\*

>SPBDM4\_v1\_70108|ID:27159566| Dipeptidase, Metallo peptidase, MEROPS family M19 [Uncultured spirochete bdmA 4]

MAQQQEDFYVDAHCDTLM SLTGRSMNKEENKYRDFFTDNSKVHIDL PKLFRGHVACQIM



AIFLEDEQLPNATEEAMLMIEAFDRLKLNSTGGFSLAKNGADVHRAIAEKNVSAALLSIEG  
AEALGDSLDSLDEFYRRGVRAIGLTDNRNNAFGRGLKAEGDDGLSPLGKQLVERMQDMHM  
LVDVSHLSEEGFWEVAEIVRGPFIASHANARTVLDHPRNLTDQAIRAIADHGGAIGCVFV  
PYFVTKDPNDCSLDALMLHVDHIVAAGGIESCAMGSDFDGFKPIDACVIEDAGEFHLYE  
ALRRNGYSHAEAQKILGANWLRVFDEVLG\*

>SPBDM4\_v1\_70109|ID:27159567|uvrB| excinuclease of nucleotide excision repair, DNA damage recognition component [Uncultured spirochete bdmA 4]

VKPFKVVAPYGPAGDQAQALDALAGAIRGERYAALKGVTGSGKTFTMAKVIEAIQKPAL  
IISHNKTLSAQLYREFKGFDPNAVEYFVSYDYDYYQPEAYVPSKDLIEKDSINEEIDR  
MRLAATAALMERRDVVIVATVSCIYGLGSPDLYRDMRLYLDKGQSVDLDAVKRNLISLQY  
ERNDMVLERGRFRIRGDVLEIFPAYLEEAYRIELDFDTIIRIRRLNPLTGEATEELEEAV  
IYPAKHVMPENMVQLAVDRIKGEAERHKFFLEHGKYLEAERIKSRTEYDIEMLEEMGY  
CSGIENYSAPLSNRKPGERPGVLLDYFPRDFITFIDESHVTLTPQIGAMYAGDRSRKLSLV  
DYGFRLLPCALDNRPLTINEFESIVPQTVYVSATPGAEAEIKRSKTLAEQVIRPTGLVDPEI  
QVRSTEGQMEDIYARVRQRAQHGERSLIITLTKKMAEELSEYLGGLGLRVRVYHSEIETI  
ERVEILTQLRAGEFDVLVGINLLREGIDLPEVSFIAILDADKIGFLRSETSLIQIVGRAA  
RNAAGLVVMYADTMSDAMRRAIAETERRRTLQQEYNREHGITPQTIQKKVQDILERHREE  
KIEASQDEL DVIRRTHNILIPEQRRSLIKEMEKLMEFEHAKNLEFEQAAQIRDEIAKLGKGL

\*

>SPBDM4\_v1\_70110|ID:27159568| Peptidase S1 and S6 chymotrypsin/Hap [Uncultured spirochete bdmA 4]

MKLYSKTQVGIAVAISVALTALSIAGIIIFFNKPMKSQSPSNFASPIETSHNGTDDNFEP  
SGQTGINQTLAESIPVTNVSQYPPGGYSSEEAEENISYKYNESVVNITTEVLSINWFLD  
PVPQSGSGSGSIIDEQGYILTNNHVVDKAYKLYVSLSDGSRYEAKLVGADSESDLAVIK  
FAPEAGKKLKPIPFGTAKNLKVGQKVLAINPFGFLERTLTTGIISGLGRPIQESNTTILQ  
NMIQTDASINPGNSGGPLFNTRGEMIGINTMIYSPSGGSGVIGFAIPVDTAIRIVPQLIK  
NGQVRRGWIDMQAIQLFPDLIDYLKQSGKGAPVDSGLLVSTITSGSNAERAGLRGGTTAV  
RYGSTVFYIGGDIIVSIDNKPVTSIAQLYSALEDTPGQQVTVFVYRGSKKMSANITLSE  
RKK\*

>SPBDM4\_v1\_70111|ID:27159569| Cob(I)yrinic acid a,c-diamide adenosyltransferase [Uncultured spirochete bdmA 4]

MSIVTKTGDDGTTGLWSDERIGKDSLRLVEAYGTIDEFSSALGMARHLCLQDNVLYAIEYV  
QRLLFRVGGELASLGVAFDRPINEDDERTIEMKTSEIEERIPLRGFVVPGMTQGSAAALDV  
ARTIARRAERRVVALSRTESVSPVLLRTLNRLSDFIYMLAREEEAAQGKLTFI\*

>SPBDM4\_v1\_70112|ID:27159570| putative arginyl-tRNA--protein transferase [Uncultured spirochete bdmA 4]

MPQDLGIVQHFQARGTCTPYLMDHRESITDYLIQFQEVDPFLYALIRDGWRRYKGLYRM  
LCPGCRLCIPLRIHAASMHLAGSLRRILLNRDLLIIPRPPAFIEEHYMLWRNYSLWKHS  
CNPDELDEASYCQLFVPSLIFEYRENNENKRLIALSHVDPLAGGLSSVYFSFAPEAKAR  
SPGFFSILAEA YIAAFIKTDKLPNKEISAKTIFSYENKKTLKSTRPGADEDIGCQHGS  
PWYYYLGFWIPGAPKMDYKARIRPFELIAESEAANIASTWRQYASRDEALAYLHEKRWPG  
L\*

>SPBDM4\_v1\_70113|ID:27159571| putative PpiC-type peptidyl-prolyl cis-trans isomerase [Uncultured spirochete bdmA 4]

MASEENKKQTPSNGKASGEKKAENKKNKSSLKRNIKNPVYIGTIVILVLTIIAFVLIPG  
VGGGVSSAGKVPTFGSWNGTPIQYSSDSYFADQVSQINDYLRQQGMNESQSQLYAYQVWR  
MAFQNTVIRTAILDSAKRSGMKISEQTIDEEVAKNTQFQVDGKFSLEKYNSTPSATRMSI  
RNRIRDDQLIQNYYGDLMSVSPSTGEIDFVASMAKPQRTVQYVNISYADFPQEKTLDWAK  
SNESLFRRIGLSKITINTSQKDAEKVLAQIKANSLSFEDA AKSHSKDSYADKGGDMGTKV  
FYDLKGEFLNEKDADAVMALKKDEISPVYKESGNTWAFYRVNAEASMPDFSKQSVLDEVK  
SYLFDKEKSVMESWALAKADEFASRASKSPFAAAAKEVGLSKAAGPFILNYGKPSFYFY  
GQQVGLFQEPYRSLDTEL VGAESETEFLTTLFSTAKNAVSKPVVLDASVVVMTVTDDETEG  
TDQEISYTKFTYFYFYQTATENQIRGSILSSKLFKDEFNSTFVKLFTPAQK\*

>SPBDM4\_v1\_70114|ID:27159572|lepA| GTP-binding membrane protein [Uncultured spirochete bdmA 4]

MIEPEHIRNFCIIAHIDHGKSTLADR FIEKAHLIDLRFQDQMLDNMDIERERGITIKSQ  
AVSLPYIAKDGQTYMLNLVDTPGHVDFS YEVSRAIAACEGAILVIDATQGVEAQTLNMY  
MALEHDLEIIPVINKIDMPAADVEGVRRQIEKDLGLDGDSALAVSAKFGTGVDLFEAIV

ERVPSPTGRADNPLQALIFDSHYDPYRGAVVHLRLKEGVIKKGMVIRLMSTGAIHEVEEV  
GHFRITSVPAEELGAGEVGYCIAGIKTVKEVRVGDVTGNENPCDSPLPGFKEVKPVVFS  
SIYPIDSADYEELRDSIEKLVNDASLIFEKDHSLALGFGFRCGYLGLLHLEVQERLER  
EYSQSIIMTAPSVRYRLLLKDGTTLFIDNPSEYPDPARIESAEEPYIKAQVITPVDYVGN  
VISLCLAKRGTQESFVHLDEKRVELVFEMPLSEVLFDFYDKLKSTSRGYASFDYDVTGYR  
PVELAKLDFLINGEPVDALSMLVYRPSAYDRARIVCERLRNNIPRQQYKVAVQGAIGSQI  
IARETVNPVRKDVLAICYGGDITRKRKLEKQKEGKKKLMIGNIELGQEVFLSVLRASE  
DEEH\*

>SPBDM4\_v1\_70115|ID:27159573| Glutaredoxin [Uncultured spirochete bdmA 4]  
MNLQNLPPVTKETRNNHDMVYALSTCGFCKRALAFLDANQFTYKYLYVDLIPIDVKNT  
IKQELKERFKENVAFPFVVIDDKKYLVGFIEADWKLTLQV\*

>SPBDM4\_v1\_70116|ID:27159574| Ferredoxin thioredoxin reductase beta chain [Uncultured spirochete bdmA 4]  
MANYKTIEQTTVFTQMVAANKQGWALNPDKAFYDTLVEGLTKNYNRYGYFLCPCRDTEGSR  
EADRPALCPCIWSKPDIAEYGHICYCALYLSKEFVTAGKTPKPIPDRRFENA\*

>SPBDM4\_v1\_70117|ID:27159575| putative cysteine desulfurase [Uncultured spirochete bdmA 4]  
MRDVFLDWAATTPADPEILQRSLDLSLEVYANPSSSHWLGRQAKQLLEESRTSLMRALAI  
SKGTLVFTGSGSEADHIPLALVHRLKPVASRKPLHVIVSAIEHSAIDCQIRALEKLGVE  
VSWINPDTQGHIDPNQVSARMRKETALISIMGVNEMGAIQDVSAIGOSIKDAALQSGMK  
KPWFHVDVAVQMLGKLSMREVPDYADSFSAISHKIRGPRGIGALWLSRPLEAFACGGGQEG  
GIRPGTENLFGAFAFRFAVEKASESLAHHAHAQELESRLIEGISHIEGALLVPRRAPRD  
EGYVPSIVSIAFPGLGGETMVRALSDRQIAVSTGSACASNQRRQRRVLKAMGVPDDISF  
SAIRLSTGPLTTPEDIDIFLEHAEDLYRKLKT\*

>SPBDM4\_v1\_70118|ID:27159576| putative tRNA sulfurtransferase [Uncultured spirochete bdmA 4]  
MRTFFLIKPGEIELKLGNRREFIQRLKDQIRRRLLKGLHFELEEYPGRFFLNIEEKDSEIA  
LFVLQHCPGINGIAQTIKSEKRTERILKAAIEIASKEAARGARRFKVETRSDKSFPLDS  
YGMSVAAADAVLEHFPALSVDVHTPDFVLMVEIRERAYIYSSTAPGPRGLPVGSQGKGLL  
LLSGGIDSPVAGYMMAKRGLALESVYFHAYPYTSLEAQQKVERLAARIAIWSGDMSMWIV  
PFTEVQQAIARGPREGANTLMLRMAMMQASELIAHRINARAIVTGESLGQVASQTAENMR  
LSQNPTSLPVRPLVGIDKEETIALARRIGTYDISILPYEDCCVLFSPKHPILKPDFDEL  
HTYFESLVLGDIIIEAAVENAEKKILNFTDALREYGYHIASEQY\*

>SPBDM4\_v1\_70119|ID:27159577| RelA/SpoT domain protein [Uncultured spirochete bdmA 4]  
MSDIENIPNKALLSDIYIKNRANYEEALAKTIRDISKLLQRKGIHPTIKSRVKDFESYFA  
KKIKVLKNAWDEHKDPLPINDVLAMRIICPFLRDLDEVEATIAKHVDIVEIERKGQDRSF  
REFGYESIHLIRIPDEILPLCAGLERNVIEIQLRTLQEAWAEVEHEL VYKAEFTPFDE  
PLKRKLAALNATLTLSDIIFQEILDYQNKLNALKKRREAFYGKIEQTSAQVFGITESLS  
GELPSPVRQKKVPAKTGLSAKQGQVQNRWAGLDIDTLLLSALDAHNASDFKTAIAIYTEI  
LSRKPEAAIAAVVFKHRGMA YFAQSEYPDALADFTSCLMLDPDCYKALY YRGVVKSIQDE  
LRQAIDDFTKALEIHPYHFFSRYRRALCWWQLGDYVQAHADCEIALRIKPENKLAQELQK  
KIENIVKEEI\*

>SPBDM4\_v1\_70120|ID:27159578| protein of unknown function [Uncultured spirochete bdmA 4]  
MSAVSDHEHKERYIIALLIIVAVVFIVWRGPTLQFNGMRLYFPDKDGQTLKLEKRPIAPI  
GNLEEKAKDIVEELLGPLSRNLQPVVHVDISLERVVS GKNALFLDFTTEDLPGFSAEYE  
TFKAAIEKSLHDTIPGNFRIYL YINGILSR\*

>SPBDM4\_v1\_70121|ID:27159579| Cell wall hydrolase/autolysin [Uncultured spirochete bdmA 4]  
MHVCQNRISKLDLNPQSLKATTLISIAIVLMLIFCSVSFAAAQEAPQQDMSLSALVQSLN  
ASLEYDPLTHAGTITKEGRSVRFALDVPYVLLDWAIVKKVPSPYETDESLQVKKEFADAL  
RQFFEVKPGQSSKYSVKAIVIDPGHGGKDPGAIGEFDDFKLQEKDVNLAIAHRLAELLRI  
RYPDRTVLLTRSDDTYPSLEQRVEMANTI KLGETEAIYISIHNASFNKNTRGFVWYL  
NPDYRRTVVDEQTAKEKGEDIAPIINTMLEEEFTTESIILAQKVYQRMGKMIGDESPSRG  
IRAEWFVVRNAKMPSILIEVGFVTNEKEALLSQAGYLRRIADAIYNGVCD FIEHF EQ\*

>SPBDM4\_v1\_70122|ID:27159580| Vitamin B12-dependent ribonucleotide reductase [Uncultured spirochete bdmA 4]

MKIKRLFTKAGHGPYEGIVWEKRRSEIRNPNGASVFSMDAVIVPSFWSPIASDILAQKYF  
RKASVPKDKALDWTKYVPTSQASLSDEDIADDDSEHDARQVFHRLAYTWCQWARSANYFDS

DEDEKAFYDELICYMLAHQIAAPNSPQWFNTGLFAVYGIEGPAQGHYFVDPSTNQVVKSES  
AYQRPQPHACFILDVKKDDL VNEGGIMDLVTREARLFKYGSGTGSNFSRLRGANERLSGGG  
VSSGLLSFLKIADRSAGAIKSGGTTRRAAKMVILDADHPDVEEFVRWKTEEEYKVAACLA  
GSGLLNHYAEAMISAIEDMGAEDENSYLPDRNPLLRRVVKQALDAGAPSSWIHQVLTFFYS  
QTGKAPRLPLYNTAWESEAYNTVSGQSSNSVRVSNEFMEA VVNDLDWDLIGRTTQKPF  
TTKARDLWNEIAESA WLCADPGLQFHTTINEWHTCKADGEIRGSNPCSEYMFLDDTACNL  
ASLNLLSFYDEKTGTFDDAA YRHAIRLWTIVLEISV VMAQFPSKEIARKSFDYRTLGLGY  
ANIGSLLMVMGLPYDSRGRSVAAALSAILTGESYAQSARMAKEFGPFARYEANKEHMLR  
VIRNHRAAHNAPPEFEALS VIPKGLDVEFCPRNLSDAAHQCWDEALQLGEKYGFRNAQ  
VTAIAPTGTIGLLMDCD TTGVEPDFALV KFKKLAGGGYFKIINTSVPPALHALGYSEGI  
GDIIAYALGKGTLEAAPGIPRQSLLDKGIPEETLQKAEMALQNAISLESCFSPYIVGYDV  
MEKLGISKEEADVPTFSL SRLGYSEKEIEKAELFACGTMSLEGAPHLAEKD LA VFDTAT  
PSGKRGRTRISWQAHIAMMAAVQPFVTGSISKTINMPNNVSID DVKGAYTLAWRSMKSI  
ALYRDGSKLSQPLAALAPGSDLIADSI VALQSNELIAEEPGSGDLTSTAPLQTTPEPELP  
GMPFAPRSVRRALPSRRKGYTQKAKIGGHSIFLRTGEYEDGTLGEIFLDMHKEGAAFRSI  
LNSFAIAVSLGLQYGVPLEEYVDAFTFRFEPNGMVS GHDYLMATSVLDYIFRELAISY  
LHRYDLGQVKPEDLIATSTQSI ADEGSNAFESGRKQKQDKQKPKGTRASPASVKASFSG  
GGERDQAIMLMRTARQKGYEGDPCVCGNLTLVRNGTCLKCDTTCGSTTGCS\*

>SPBDM4\_v1\_70123|ID:27159581| putative Arginine deiminase [Uncultured spirochete bdmA 4]

MRSVRIESEIGRLRRVIIHNPGEIEAMTPRE AERDL YNDIIPLSAVQQEYIKLRDFLSL  
ITTTYELVDLLEACLSDEQDKLQFLKEYSKINPITHIVDDLMAFPKELARSILTGIIAP  
KGLSARYLNPHSFIANPLPNA YFMRDSLAI VGRNIVSAAFTFDVRMAEACITRFIFLHHP  
DFQNDGILLDGPEERNRLVTIEGGDIHVLSSNVLAIGISERTTAF AIDRLARRIARATEA  
PTTIFAVDLPKERATIHLDMVFTMIDRHAAL TYKPVMLSSHRAQVYRLEADSQGEIHYEE  
EKSLFDGLQKIGIELEPVLCGGGHSVYQEREQWLSGANSFSFAPGKILMYSCNMYTLEAL  
SAHGFAV VPAQDFLDGRADPEKYDRLA VAFDGIELARGGGGARCMTLPVEREQIEA\*

>SPBDM4\_v1\_70124|ID:27159582| conserved protein of unknown function [Uncultured spirochete bdmA 4]

MKQRRIIIIGAAGRDFHNFNTRYRQDESAEVVAFTA AQIPNIDGRKYPAELAGPLYPKGI  
PIFSESELSALIKEYNIDECVFSYSDVPYSHVMKVS AIVNAAGASFTLLGPKDTQIKSVK  
PVISVCAVRTGAGKSQTSRKIVQMLMKRGLKVV AIRHPMPYGD LVKQKIQRFAKVEDLAY  
HKCTIEEMEEYEPHIARGNVIIYAGVDYEA IREAEKEADVILWDGGNDFS FYVPDLQIT  
VADPLRAGNEVSFYPPGEVSLRTAHVVIINKIDSASPEQIQIVRENIARTNPKAIVIDAAS  
PITVDHPEFIRGKRVLCVEDGPTLTHGMMKYGAGIVAARKFQAAQIVDPRPYISGELVQT  
FRTYPEIGTLLPAMGYSEVQKRDL ETDINRTDCETVIIATPIDLNRIITIEKPAVRVSYE  
LQEIGSPNLEEVLSDFCSQQGLC\*

>SPBDM4\_v1\_70125|ID:27159583| conserved protein of unknown function [Uncultured spirochete bdmA 4]

MEIDAFPKAKEYQDFLEFVFP GSSPSKAPRALLSLKKAGDMKYDPRGETAARLSFFRRLG  
IEPGRIVGIELKHSRNVAFIDTREDLRNLLRTRPEGFDGIITNPSLIPGVTVADCMPIY  
LFCKTTGAFGLHSGWKGTGILKTA AQGMMERYHCRPNDISVVF GPAIGVCCYA VDPERA  
ALFRHEFGPSSVREETKEGETHYIDLLAANMGLA QSLGITHYVAVQTCTSCDDRFSFR  
RDGPQLFTRMLALVLSPPY\*

>SPBDM4\_v1\_70126|ID:27159584| protein of unknown function [Uncultured spirochete bdmA 4]

MPFIDLNEPYIIDVSHDVA AVFKPCGWHSALHTTGDISMTSWLFEHGDILPASELKNAVH  
DQTLPAQNGVQKWDEHDQFQ GELGMLYRLDRDTS GILLFALNRSTMDSMRRAQDNLALK  
KRYMFACTESNHELPGSMPRVRYAERA ALLDKLYVRQEIDVASYFRPYGPRGARVSCISP  
ELVQKPKKRIAKDIYVTKYLSAQNAGVEYHAPLGLPTGTIFIEAEIRKGRHQIRAHSAW  
MGLPILGDSIYGGVYSKRLFLEAFSVTLTDGTRTIAEWKLYNGN\*

>SPBDM4\_v1\_70127|ID:27159585| ABC-type multidrug/protein/lipid transport system, ATPase component [Uncultured spirochete bdmA 4]

MAEFFDTEPVTKGYDAHILRRILSYLKPYKLF AFIALIALALSTAGELLSPTIIQRAVDN  
ALVREWYGVDP SIVSTLPKANDLTGITIGARVYVRTSRLAGIADKERKQWNAQGLLDGEP  
SYVFSLESLEK KVLIAQRYPQIVLSESWGVLPSSLLNSLSSDDAETIRAGDNAILGHYA  
LLLLLILTVVLLATFTMTWFTNQIGTLIMKDMRLQLYRHVIEQSLAYLSRQPVGRLVTRL  
TSDIEVISQFFTDVLSAFIKDATVMVGALVVLVFLNWKLG FVVVFATVPLILIASAIVRVK

ARDAFRNQRYWTSKVNSEHISGIDIVKFFVQEKRVAENFGKNNQQLKANIAEMYVY  
ATFRPFVDFMSTLTTALAILAGAVLFLRLEISVGTLIAFINLIAMFYSPIKDLSEKYILL  
QSAMASGERVFGLLDTEDEKLPEQLPDMRGKDAPLAIRGHIELSHVWFAYKNEEWVLKDIS  
FVVNPGEKVAIVGYTGAGKSTIANLLARFWDIQKGDICIDGIPIGQYPLKRIRKFIQVPV  
QDVFLFQGTVRENIVLGLDLPQEKLEEAAKAVYAHEFISALPKGYDTPLSEGGLNLSLQ  
RQLISFARVLAHEPSIILDEATSSIDTETEKLLQKIEGLLKGHTSIVIAHRLSTIRDA  
DRIIVLGQGHAIESGTHDELIAQRGVYWNLYRLQSKEME\*

>SPBDM4\_v1\_70128|ID:27159586| ABC transporter related protein [Uncultured spirochete bdmA 4]

MFKEYVTLLPHLKQYKYRYIAGILCLIAVDASQVLIPRYVQTTIDTIVSGSFQVKEIVHP  
LVIMVLLALFISIGRFFWRYFINTASRRIEAEMRDRLFHILTMSGGFFRKNTTGDLMAR  
ATNDIGTIRQATGMGFVALVDGVFMTAMILVAMFANNAVAWIIPLPLITALILLFGK  
IVGKLFKRIQDIYGRLSNIAQESLSGVRIVKSFVKEHYFFEKFEVTNTEYKNAIMNLVKT  
SGFFFPFITFLSGLSTVLLILFGGNAIHNKMTPGSIIAMLSYLEMLVWPMMSAGFTVNI  
VQRGAASLKRINEILNTEPEIQESPRHVAGKPCGDIEIRELDYRYSGSDMLALKHISVRI  
SEASMLGILGKVGSGKSTILKLLPRMLDAGEGHVFIGGIDSCFFGLKELRSIFGMVPQES  
FLFSESIRSNILFSASDIGNERFEEVRIAGLDHDMHLFPDGWDTVVGERGITLSGGQKQ  
RIALARALVIDPPVLLDALS AVDAETEERILSALLKERRGKTTVIVSHRISTLRNADQ  
IIVLDGGEIVQRGTHETLMSEPEGFYARIAALQLEQESCAACEDAGLKEEAIDG\*

>SPBDM4\_v1\_70129|ID:27159587|rnhA| Ribonuclease H [Uncultured spirochete bdmA 4]

MQGVARHWLVCHSAHMTQQSIVIYTDGGCKGNPGGWAYVMRFGTRYRESWGAEPHTTN  
NRMELTAVINALSFLKGRLEGTRASCAAKSAVLPAWTGAPVHIFTDSMYVKNIGISGWITD  
WKRRGWKTAACKPVMNQDLWQQLDGLCIDLGFHFEWVEGHAGNPDNERCDTLVGLAIEEM  
IGQNEQIIHHEAELPASKDDDIL\*

>SPBDM4\_v1\_70130|ID:27159588| conserved exported protein of unknown function [Uncultured spirochete bdmA 4]

MKKRKYFGLMVVAILLSSCASAPVPEWIRKTPKPKDAKYTYFVGSSSAKDSATALNDATS  
SLIAGIMQFMGVSISVTSSAEARASLDDYQAQITQTVKTESTGRLAGFEVAEKYIQKDPK  
TGQYTVHVLARYETKELLKEKTRIESLFNEKIDAVAIPEQKGDAAASDRLLDAIRSYAE  
AMTAAGGSDIENAQIKLERNAKKASGLAATLKLIVPSSQGASISVGGQLPSFHASLVANK  
GGIEQGVSGAPLIITYPRRLASGRIGTSTTQSFTDQNGNAIFEVPAIDIAGNYRVTIQLD  
FASISDLFASLPSWALPYSDAVESDLSGIVAYIHYKVISAANKNIPTAIAVYGKNPANAGK  
IDLGIFVGSLEKEPLIKEGFVILDAAEPEVGENPDIAQLKAAAPPQAQRFALITLIDLVSVS  
KGDYFIAATTSGSMSVFDLTGGNTLYSASKNAQGMGLSETEAIANALKALGGQTFKDLL  
SALP\*

>SPBDM4\_v1\_70131|ID:27159589| conserved exported protein of unknown function [Uncultured spirochete bdmA 4]

MRVWKVLLTVMIVMLVASCGTKAPLRKGEVLIEDKGTAYGIKTPKWVEQAIIGGYRDIEK  
LADYKDKTVFIAQFEAQNLSAQLLAERMQADTEIARYLSTRVKDAFKGANVADADSKNF  
GAYGERFVASVGEAKFSGFRMEADWWVKVQTYTPENKPKQIYRVIQLWAIEKTMQLQKQF  
DILFSQMAGTEEPTPEQKRAMDLVQNTVAKDFFGEDK\*

>SPBDM4\_v1\_70132|ID:27159590| conserved protein of unknown function [Uncultured spirochete bdmA 4]

MPGGTQVPSAVPSTPQASTASYGALTPDETLFFQNYINRLSYLVYYDENSGLDPQLAKAA  
VSQANRYLIEKSGLSVIDFDQIQKNKKDQMSAYQAETGGSIDIVTYIAQKLNADIYLEID  
AKTTSGGGPGAWTGSAQGSMKIFDASTATLLGSISFLSPQTFSPVSADAAMMNAIAGIVW  
QSMKPVTEQSKALLSGVTATRGVRYELVLQNTPDAAKAVSQFEKNLSKRVREVESLSYAPG  
EARFALYAFMPASKIQDAIYEASAAGFPDCYLLYMRGRSYTFNTGL\*

>SPBDM4\_v1\_70133|ID:27159591| conserved membrane protein of unknown function [Uncultured spirochete bdmA 4]

VKLIHSPTARLSLLVLFSILFLKPTFSQAKDNTLSPPEITGIYFTETGCSHCDSFLYVQK  
AKLEHDYGVSIIVLETHDILSAAGYEQCVMKMLKQKQLNFTVFPVLFVGSNIYRGSSAIEEN  
MPQEIEYYLAHGSYRPAHRTNELASNADQSDKAFVASIIPSILAGLLDGINPCAFSTML  
FFLSFIALKRRDRRSLAWVGISFILAVFVTYFLIGLGLGALRKYLSENRFSLYVDIFVS  
ALAAIFAVLNVRDAVVATQGRASESLLQMPFFLKRMSHRFIRYFNQLPLYLGAALSGFL  
VSVIELACTGQIYLPTIAYMNQSARSSRSIILLIYNVAFIIPPLTLVFLYFFGLRHERI  
RQWYGTHLVLRVLSALFFIALGVLVWIP\*

>SPBDM4\_v1\_70134|ID:27159592| protein of unknown function [Uncultured spirochete bdmA 4]

VTALAATKARRGKTLWLEKQENTRQNEIQDARPSATPRLVLGADTLVAFQTQGGWITIGK  
PANERDAFDMLSMEAGKRHTVFSGLCLLDMTRDQPYVALSVSEVQFSPMTNEDIAWYLSF  
GEWRGAAGAYRIQGVGSYFIEEIKGSSSSVMGLPIRELYGILRESGYFASP\*

>SPBDM4\_v1\_70135|ID:27159593|rpsB| 30S ribosomal protein S2 [Uncultured spirochete bdmA 4]  
LLHRKEKQNELTIRLFKVGHFPPDFRFSKQDEIKGRGSDYLRSEVYVAVVTMKNLLESG  
VHFGHQVKRWDPKMKYIFAERNGIHIDLQKTIQAIKEAYDAVQKVSSGKTVLFVGTK  
KQAQSAIQKEAERCEQFYVNNRWLGGMLTNFSTIRKSIQRLKKIERMEVDGTFNSLTKKE  
IASLLKEKTKLEKNLGGIKEMTSLPGILFVVDTRKEAIAVAEAQRLGIPIVAIVDTNCNP  
EGITYPIPGNDDAIRSISLFTQIIANAVIEAGASEGLKIIETLPTEEEQELAVPAKTEDD  
EVEIDVENYADSSVQSEKESEEPAEIETPIVDEDRLYEEK\*

>SPBDM4\_v1\_70136|ID:27159594|tsf| Elongation factor Ts [Uncultured spirochete bdmA 4]  
VEIKATDVKALREKTGAGMMDCKKALNESQGDGFAAEKLLREWGMAGVEKRAGRATNEGR  
IFVAQTENELALVELACETDFVARNTDFINVGTKIAETALQQKASGPNEGLEARVKEIAS  
LIKENIALKRVAYFSAGMNETLHTYLHGEGRIGVVVKFRANDPAAFKNEKVAAFVHDIAL  
HVAAFNPMFLDESKVPQAWLSEQKEIFQKQVEMDEKMKSKPAKVLEGILAGKLLKLLAEV  
CLVDQGFVRDEKIPVAAALEQVAKETGYQLAIVEYYFAKVGQN\*

>SPBDM4\_v1\_70137|ID:27159595|frr| ribosome recycling factor [Uncultured spirochete bdmA 4]  
MESIRAANEERMKKTVSALHDEFNAIRTGRASPALLDKVRVDYYGQKTPLSQVATISVPE  
ARLVIQPWDRSLFSEIEKAILRSDLGLNPSNDGKVLRIAIPPLTEQRRKELVKTARNIA  
EQSRVAIRNIRRDGLEELKQLSAGGVAEDALKKEETEFQKLDDYIAQIGKILETKEKE  
IMEV\*

>SPBDM4\_v1\_70138|ID:27159596|ispU| undecaprenyl pyrophosphate synthase [Uncultured spirochete bdmA 4]  
MKEIRVPSHVAIIMDGNRWAKQRGLARTAGHQEGLEVAKRIVLAARQEKVHFLSLYAFS  
TENWKRTTQEVGFLMSLIRIHLTKELDFYRKNKVRVHSGDRSELPAEVLAEIDRAVEDT  
KHHNGLTLNLAINYGGRNEIVRAVRCSLSNLYETGTIGARDAMSKDEVTGAMTEKTIALN  
LDHPEIPDPDLIIRTGGEMRLSNFLLWQSAYSELYFSSKYWPDFTPEDFHAALADYAHRE  
RRFGDAR\*

>SPBDM4\_v1\_70139|ID:27159597| putative Phosphatidate cytidyltransferase [Uncultured spirochete bdmA 4]  
VNENTRARLLFFIGIPLFFSVLCCFPFAHFVAILVVFLLTVQYLSSLELRSMLSRGGLHD  
PGLGVTIAGLVQSAAVYVACVLSVSPSEVGLLFFASLMCLTIELVPLGAKKKALFPGLL  
KEAGSIVLVHFYTALLPSLLVLIVSGFPDARNATTTFVLLTIGNDSLAWLFGKYIGKKRN  
VVDVSPNKSIAGFIGGTIGSIAGAFGLGPLAGSWRPLEWNYIILSLTLGMGMAFFVIAG  
DLFESALKRSAGAKDSGDIVPGRGGVLDSEFDSL YFSAPFFVAFSFLFHLFGL\*

>SPBDM4\_v1\_70140|ID:27159598|dxr| 1-deoxy-D-xylulose 5-phosphate reductoisomerase [Uncultured spirochete  
bdmA 4]  
MPKR VIVLGAAGSIGRQTL DVIRQSLGSEDM LGLAGFSVHSNREMLRQLKNEFPQAVAAW  
TGDIAAVPSGTA WAGPEAMARLLSETDADIVVNGIAGASGLSASILALRNKMNLALANKE  
SIVMGYRLLKKLADENHCAIIPVDSEHAGLFQLIQRIGRNIISELTITASGGPFRFLPLD  
QLPSMTADDACKHPVWKMGRKISIDSA TMANKGLELIEASRLFDMPQEHIQVLIHPQSYV  
HAMVRTIDGTLYAQISKPDMRPLPIHAALYWPKSTPVSFGSANLAGKSLEFYEPQRERYPL  
LWIARQALDEGEAPCIA YNAANEIAVGNFDEGNIKFTQIADVVLKTLEKGNLPISSFED  
IFDIDTGARRIAADLMEHYA\*

>SPBDM4\_v1\_70141|ID:27159599| putative zinc metalloprotease TP\_0600 [Uncultured spirochete bdmA 4]  
MITILLGLIGLSIVVIVHELGHFVIARSVGVVEAFSVGWGPALFKRKGKKTTEWRIGVLP  
IGGYCKLKGEDGFRAALDQKLDIFADKGSYSAHPLKRV AIAIAGPSFNVLFATLVFVF  
VVAIGTTIQTAPNRIVLSSETGAMIQNGMPNPADIAGLETGDVIRAVDGTKIRDYSDLQE  
IIASNPGKALSVEVLRNGSVQNLVITPHLDRNSGAGVIGVYAVVDPVIATVKDQSPAIA  
DLRAGDIITEANGKAIHNTVDLMEVFKNASGPVSLMVMRDAEPFPTTIVAKSLEEMGIGF  
VSVIRTDKATSLPDAVSKGFKETASTFSLTIKSIGLLFRGVNVFKA VSGPARITYLIGTA  
ASEQIKADGLAGLVPVLSFLAYLSVALAITNLLPLPVLDDGGLILVFIIEFLRKRALTPQA  
LYRFQFIGAAFVVLVLFIVATMSDVFFFAGK\*

>SPBDM4\_v1\_70142|ID:27159600|dnaB| Replicative DNA helicase [Uncultured spirochete bdmA 4]  
MAGPSLKDTMPLYNGDAEQACL GALLIDPESINSVLKYLRSESFYEPANQEIFESLLAMH  
EKGQKPD LITLSEELRSRGLSERVGGSA YVASLASFTPSAANIEYARIVQEMSTRRLI

QVSSEMAAMAHEETMDIDRVLDELQAKIFEISQNRRTAEYHSAKEIVTETMLLIEKLSTN  
PEAFTGIPSGLTDLAMTSGFQNSEFIVIGARPSVGKTALALTAHAASIDLKIPTAFFS  
LEMSESAIMLRLLISSEAHIPAERIRTGRIRTTDYDSLMEAAARIYEAPLYIVDMPNMKLL  
ELRTMARRLVLERGIRILFVDYLTTLITHENADLPRWEQISAISSLKALARELNIPVVAL  
SQLKREAEGKQPTLADLRESGSIEQDADLILFLHRDREMTKGHDQQSDQMETDLVVAKQR  
NGPIGKTSVWFKSSYAKFVNMERHEHKQ\*

>SPBDM4\_v1\_70143|ID:27159601|rpII| 50S ribosomal protein L9 [Uncultured spirochete bdmA 4]  
MKVILNQDISNLGEIGDIKEVAAGYARNYLLPKKLVLVYNEKTVAMLQKRQVEIIAIEQ  
KRLASRSLKEKIEADPLIAMPAGNNGKLYGAVTNHTIADELLKKGIEVDKKEIEVPGRS  
IKSVGNVYKVLIRLYEKDEATLHCSVEAQA VAGLEEKKTTEGEAKKHRPRRQRTESEPVTA  
EEQAAAFEAAVNRRGQLS\*

>SPBDM4\_v1\_70144|ID:27159602| membrane protein of unknown function [Uncultured spirochete bdmA 4]  
MDSISSRNSAHHIPAFLSWGVLSGLLYASGFLAMAFVPIQYVFRKEGKKEGLLSMLISL  
VIVGLGNAFRFSDPNIMRLPLLQTLVSPALLLLAIGSINLVNIDTWKKTVA AAVVLSVI  
FGFLLQASIGTEGVQQSIAGMIAQMIDSTGMQSPDISTIAQSYVAPAVSIIFDCFGAALW  
LMLAGSWWIGNRLGALKVSTEEKIQEGKSSSFNVPSWLLWPSIAGWTLLLFLVLYGHKTGI  
LAIIAWNASLAAASWYGLQGFSVISRFFQLKGMQMTGLVLVLLAVLILLDTKVGLAVAM  
LVPVLGVSEVWLQYRIHKGA\*

>SPBDM4\_v1\_70145|ID:27159603|rpsR| 30S ribosomal protein S18 [Uncultured spirochete bdmA 4]  
MDEMKDIEEAKASRAEVDQQDMRRDQDDRNGPRKGGFFRKKVCRFCTQNVKIDYKDADL  
LRRYTTERGKILPRRITGTCSKHQRLLAVNIKRARSLALLPYVVK\*

>SPBDM4\_v1\_70146|ID:27159604| Single-stranded DNA-binding protein [Uncultured spirochete bdmA 4]  
VSDINVLVLIGRLTRDSELKYTPSGLPICRFSIAVNRSKKQDDQWVDEPHYFDIEFYGKS  
AEGLSKYLLKGRQVAVQGELRQDRWEKDGQQRSKVVIVAATIRPLGSPQSGDAGGRY  
ASDSVASKPESSNGQTPASPGVDEFTDDIPF\*

>SPBDM4\_v1\_70147|ID:27159605|rpsF| 30S ribosomal protein S6 [Uncultured spirochete bdmA 4]  
MRQYELVAVLNSEEDQFKAGKQAVAELLAQYKAIDVKEDDMGDRPLAYPIKKAHAYVL  
YRMSLEPTSIIALERAIKLSPSILKHLVVKIEA\*

>SPBDM4\_v1\_70148|ID:27159606|hisS| Histidine--tRNA ligase [Uncultured spirochete bdmA 4]  
MPTIQPRVLKGRDFLPDIEMARSSLIKKLEQVFLVFGFVPIDTPVLEYADILLGKGGGE  
TDKQVYRFRDHGDRD VAMRFDLTPFARFMAEHVEELYLPFRRYHIAKVWRGENTQRGRY  
REFMQCDFDIVGTDAASADADILLTAAKAMTALKVGFSLRINHRALFNRFLARIDALDK  
SVEILRTVDKLEKTGVQATAETLSTLVAPALANDILSFIQKEEGFEKTLNKMFSFCNPSD  
VQAQAAQRRLLDIMECVAAAGDEHRVVLDPSTRGLDYTGMMVETSALALPEIGSVCSG  
GRYDELTSLYTDRKLPVGVGASIGLDRMAALDVLGISAGSDMSAQILIINQGETPIAELH  
ALAASLRNAGFACEVFPEPKTITQYTYAERKHIPLAVFANSSSGPFTIRILSHRENIEI  
ADFARLCETARKELHASA\*

>SPBDM4\_v1\_70149|ID:27159607|trmB| tRNA (guanine-N(7)-)-methyltransferase [Uncultured spirochete bdmA 4]  
MHEKESGLLDGSIHTFVLRSGRLTEAQRRAIEKFGSKYIVPFAETFLDLNSLFPEKRPLV  
LEIGFGMGQATWQIAQARAQFNLYGIEVYTSVGVRLIIDLERHELKNVRIIQHDAIKVLK  
NMIPPELAGIHVFPDPWPCKRHHKRRLMQDAVVALMAEKLKADGGLYFVTDIEEYASF  
AKASLGSCTALKNRFDGYAPHQLWRPETKFENHAKNSGRGTFELFYIKG\*

>SPBDM4\_v1\_70150|ID:27159608| Pre-mRNA-splicing factor ATP-dependent RNA helicase PRP43 (Helicase JA1)  
[Uncultured spirochete bdmA 4]

MMNPHDLPIYQQKAKILEALANQVIVVESPTGSGKTTQLPIILHEAGYASNGIIGITQP  
RRIATLSVSDFIARQLSTTVPGIVGYKMR FEDATAPNTAIKIMTDGILLQEMKLDPYLTH  
YSVIMVDEAHERSLNIDFILGLLKKVLEARSEFRVIVSSATINAEVVFSEYFGPCPVVRID  
APMYPVRVVYDAIKTVPEASPGQGPRPQGPDPGGYYRSSDEAIYDKILSIVGRVLDGDAGA  
EPGDILIFLPGEKTIKECLQTLMASRWALRLHCIPLYARLGKDEQEKVFAYPEGKIKVV  
ISTNIAETSVIDGITVVVDSGLAKINYNPRTFTASLIETPISKASCNQRKGRAGRTRP  
GICYRLYSIKDFDSRPLYPTEEIHRDLSEVLLRMAELGITDFEHFDIFITKPPKSAIRGA  
IEVLNLLDALNPDRTLTRIGEMMCAFPPLPKLSRMIVEAVLKYPDVISETLIASAFLLSTT  
SPYVLPPEETEAREAAHHRFRDPMGDFASYLQLYEAFSSARDKTKFCERNYLDERTLREI  
VRIKEQLELIVSELGVPIGSGGAISDYLCVSRGLIQFVCARQGRGMFSSLTAERIQIHP

GSVMFRQDADFIVAGEIVRTRMYAMSVSPLSKAQLYRISPELAEQLIAIRQKRPAADRNL  
LRTPKERGRERIAEKSQAQGEALHENGGRGKRKSEKQORVEVSTGRKLDTISLGGEVFP  
IEGK NQAKRTVLLDWERLSKVAPLIGPADEEFGKGLRARVEWGKVQLFNGEKLSTVIKALKWID  
IGHDLTANWPQNTNFSLEGRDTSAEQTIAALAKSLEMILHVTKFGKSGKFGFIGLYSDGT  
GNFWYQPTRSFSEALNQLSLASTELLVDYA EKLSVSASLKEKISALYRRLSDFFNAL\*

>SPBDM4\_v1\_70151|ID:27159609|xseA| Exodeoxyribonuclease 7 large subunit [Uncultured spirochete bdmA 4]  
MEFDGALKDFESSLSPLTVSQITSLIRDDLENKYPDITVEGEISNCKTAASGHLYFSLKD  
EQAVLQAVMFRRDMLSLSFVPRDGMKVVARGGISVYPGRGQYQLITRSMRKAGLDILAM  
LEERKQRFKAKEGLFDESRRKKPIPVLPRIA VVTSPTGAAVRDVIRVLHRRNPKVSILVLP  
ALVQGEAAISIAARIRQANLWNLADVLIVGRGGGSIEDLLPFSEEIVRAIAESHIPVI  
SAVGHETDWALSDYAADLRAPTPSAAAEMACSDINLIYKEITHFETVLAQSMQQALVHAQ  
QRLSAVSPRNMEGILVRRHLLLEQQFDTAIETIRQSMQKMDACSNRLTLASSAVELSNP  
RAIMKRGFSVVEKQSRTRPQQNGEIEIVRS AKTLTAGDEVHILFYEGEADASIQTVP  
GDGRSKEHERL\*

>SPBDM4\_v1\_70152|ID:27159610|xseB| Exodeoxyribonuclease 7 small subunit [Uncultured spirochete bdmA 4]  
MKDFEKKIARLEQVAEKMRDSDLPLEKSFSLFEEGVSLARELKGELDTLQGKVEILLNSL  
EEMGTEQSTSPRTADFETTEAEQQSGSEKES\*

>SPBDM4\_v1\_70153|ID:27159611| CTP pyrophosphohydrolase [Uncultured spirochete bdmA 4]  
MGSKK GKDTPISLHRSVAGIAVHGELFFIARRRQDASEMSQRWEFPGGKVERKESDEAAL  
EREFLEEFNAPIRVLRLFLGESVFANKGKARALAAWEISLDPTNIAILNEHSEAAWLPLDT  
IANMELADSDRSLPIVQATLKVNR\*

>SPBDM4\_v1\_70154|ID:27159612| putative Carbohydrate kinase family protein [Uncultured spirochete bdmA 4]  
MRPLLSTSQSLELDAFTREVFDFSSDHLMEIAAMRLWQVLKLEI IQKRLNLCQPAALRDP  
ERRVSIAAVCGKGDNAGDALAVLRHAKLEGFQNLAAFVPEPDTLKENARLNLRRAEQCGV  
EIVRYETAEEGALQGKLLRHDIILDAVLGTGAHGRARGSAARAMQMFEVLDQTQAKNGDK  
APCIVAIDIPSGLDGDWQPDYPIVRADATLCIEPMKEALYMPAARSFAGDIVPVGGIFPL  
WADAAASNWVLEHSEVRDFLPPISKWAHKMQRGRVAVLAGSQRGAGAALHCVRGAAAAG  
AGYIALYCDEEMFSSYLATVGDVAIVRVLTEDTFLPESWDAIVAGPGWGTDERREEVLDQ  
LIHSDTALVLDADAVRLFARRAGQNRDRPRFFKAPVILTPHPGEFRELLPFLDSGESSA  
CNVSETVGVQVASLAKKFGIILALRASTTHIAFPDGTCAIFDGSASGLGIAGSGDVLSGLA  
GLLARWIAFSKENGAGKEYEDNKLWHNNLVQAIIGAVLVHGGAGRKLSQTKGWFTPADL  
AHACARMTSESKLG\*

>SPBDM4\_v1\_70155|ID:27159613| exported protein of unknown function [Uncultured spirochete bdmA 4]  
MNRISR FMSACVLIVLFSGCSASTDEAKTKILFDLGYGKSDSSLDLGGGEKNAVDISLKK  
GIFHLLSRGEAKILRISSYGQTLAMWYDPRKGSAPLVKDVQINDLSAGKELGRFAMQVP  
FNDPWPMAADSRQLLYVADNRFIRRFSDGKELQPLGQEGIGGSMFPMVTALDTLENDL  
AVLCASESETS VYFYDKNAVFLHV LKLNDQTMPVPSSILEKNPDTKGSRIIASLESISPS  
YFHGRMVVVLKINYMEKYDPDSGVTLSDPVG GWIIGIDAGNGTILDSFPLQSSVNDLG  
IDQQLIGAKSNSILSVRWDK GIGGEVFRYNQK GKVIGKLNFLVPDPEAALVAMIVGDDD  
YL YLLGQLPSTLRMYAWKLPSMGK\*

>SPBDM4\_v1\_70156|ID:27159614|secA| Protein translocase subunit SecA [Uncultured spirochete bdmA 4]  
MSGNILAALLGSKKEKDIKAVLPILHRINALEPWAFSLSDSDFPAVTNKFRRERLAQGETL  
DDLPEAFALVREAARRTLGERPFDVQLVGGIALHQGKIVEMKTGEGKTLSSVTAVYLNA  
LTGEGVHVITVNDYLAERDSQWMGQIYKFLGLSVGCILSSMDNAARKISYSRDITYGTNN  
EFGFDYLRDNMVWSLDQKVQRGHSYCIIDEIDSILIDEARTPLIISGPADDDTYKVNEVN  
RLALSLVEVKKNPETGEYPDEARGELLE GDFKIDEKSKRVMFTSEG MNHIESLLQKRGLI  
KGS LFDPESEFEVHYFTQAVRSQRLFSKDVVYVQENQVQIVDEFTGRILHGRRYS DGLH  
EAIEAKERIKIARRNRTLATITFQNYFRLYK KLAGMTGTADTESEEFNKIYNLDV VVIPT  
NRPVVRADENDLVYLNEAEKFDAILNEIKTMYAKGQPILVGTVSIEKSEKLSAMLTRNGI  
RHEVLNAKNHAREALIIAEAGAKGAVTIATNMAGRGTDIKLGGNPEFRARRKAGTEAPEE  
KYREALAREYEIWHDYEEVQGLGGLCVIGTERHESRRIDNQLRGRSGRQGD PGRSVFFI  
SLDDDL MRLFGGENFKQLMSKAGMKPGEPIYHPLL NKSIESAQKKVEQRNF EIRKHLLEY  
DDVLNKQRNFIYEQRNSILSDNNLIERVREAADEMLEDQSELLAQAVKDNPSKAIPDFCS  
WLFDTFGIDLPAKQAAELYQSGNLTQEVQRILNLDLTKIEAAGTDSL NFFIRFSYLEEI

DEKWLDHLESMEALREAVYLRSYAQKNPLLEYKLEGSDFESLILSIRHNIASKVFRVKI  
KESAQAKETQTPRAPRIEAAQTSHQSVGSFAGETGEAHKESAIAAASAPASATVVRQGQK  
IGRNDPCPCGSGKKYKYCHGR\*

>SPBDM4\_v1\_70157|ID:27159615| putative Fibronectin-binding A domain protein [Uncultured spirochete bdmA 4]  
MSLNCEEIDRILSEAPLAGTKIQNIYQPSFDSLVELEYGRGALIHYFISIAHNACRLHPL  
SAAPPKNERPLRFMECLRSRIRGGTIVRAAQIAKDRIIKIEVVRADENGLPTPLYL YARL  
WSGAGNVLLVSKEGAIIDALRRLPSRNEISGETFSLPPSRENVNPLKQYAIRDLGGEGPF  
WQRIEHYYSQSTGHL SREVLLAQAEILGHKKA AIENRLAHL VSKQEEYLQAERFRQIGD  
ILAGYTIETQGTKTFARTFDYFENKELLIEIDSRVNPAQNAATYYEKYHKAKNGIDEIN  
AEIHRWKATIRQLDAWFARLDAETDPLVIAQALRKGAARSKEKPRYPQSLEYRGWTL  
IGRSGKENDEILRHIVRGS DLWLHARDYAGSYVFIRAQKNKSIPPEVLQAACRLAVYYSK  
ARKNLGGDVHTTFVKNLRRAKNGPVGLVIPYLEKNLYIIFTEDQIREILEENQLEEGNSP  
\*

>SPBDM4\_v1\_70158|ID:27159616| conserved exported protein of unknown function [Uncultured spirochete bdmA 4]  
MKRAQSIFITVLLIISISMVMASPKNKITISVLKGPSGLSSAWMMSEL SKTSPDEFEFIT  
VSGADMAVAKLLNGEIDAGVLPVNVAAKLYNSGVPIQALAVVGNGMVKFLTTDPTIEGLP  
DLKGKTIYIAGQKATPDYIFQYLCARRGLIAGTDYVPVYNLAYPEIAAGLASGKISYAVL  
PEPFAAQAILKNPAIKIPIDITKEWQSATNQSDYPMSL FVARSSLVESSPKIKILIDSY  
RASIQKAIQDPSGTGKLAESLGLGISAQIATIAIPISNFVFIEAARATPNIEALLSVFLQ  
FDPVSI GGIMPNRSFYAQIQ\*

>SPBDM4\_v1\_70159|ID:27159617| Putative ABC transporter, permease protein (fragment) [Uncultured spirochete bdmA 4]  
LLTKASFWSSVAGSFLRVLEAFFLSILFGLVSGTMSGFKPQIKAFMSPFITGVRATPVLA  
LILLAMFWFPSSQVPVFSAILMAFPIMHTSTESGVHAADQKLVQMSNLFHVPKSTVFWRL  
RLPSALPYLLAGAKNALGLSWKVVVAGEVLSQPRMALGTGMQDARLTLETPSVFAWAITT  
ILFCGLSEYFFGVFANKLSLQFQAAQDEETERGKQ\*

>SPBDM4\_v1\_70160|ID:27159618| ABC transporter related protein [Uncultured spirochete bdmA 4]  
MSAYVKSLKKSFGSLNVLENISFELKDSSIVSILGPSGCGKTTILNIVSGITKADAGSLV  
GFEHKRFSYCFQEPRLGWLNAEDNLR FALSSLVQSHKDSRDMEMRIERFLREAGLWEFK  
RYKPNQLSGGMQORLALARTFAFPSDMLLLDEAFSAVDLQKQIELMQAFLRLWTDERPTV  
IIVTHDIHDALFLADQVVVLSQRPAHVAGTLNIDIPHEKRTFASSELSKHEMELYRLLGF  
GHDNSAQS\*

>SPBDM4\_v1\_70161|ID:27159619| putative Multi-sensor hybrid histidine kinase [Uncultured spirochete bdmA 4]  
MPRIAVLEPDSIIALDIAKSIERERLAEVNLFYEVEEILGNQRKLDYELFIVDIGDNQOS  
KIDAAIKIHRDAGIYCLVISDHSISASLTKLREAEPLGILVKPFSSRELVANVETALYRA  
SMEKRLRDSERRYRNLFAYSLSARCVADPSGSIERNKA FEASFPA TEKIENIKDMFLEE  
EEWPKILDSLQRDHVFQKELLTHDFGQGQRDVICNFSFFQEELNKINILCEFIDITESKR  
LREELSQSQKLEAIGRLASGIAHDLNFLT SIMGFLEMVKMEIPEDNA ALEDIHGIEKVI  
QKTSVLTRQLLGFSRPKSYSP TTVDLRETLNDSRKILKRLIPERILFSFSVPDEPVFANV  
DASHIEQILLNLVVNARDALEKTENPRISIQDLQEDYALIKVKDNGTGIDSRHISKIFE  
PFFTTKEDDKGTGLGLSIVKSLTEMNGGQVRVESELGKGTIFSIWIPNLQRTGSFPDTAE  
QKEPSS TILDDGCSEILRNKHILIVDDDESILE SCKRILERVGADVETCINAGESILLAE  
RTEFDLLIADIVLPGIYGTELWARLQKDN RIGACIFMTGYESLQADLSPDTPLLYKPFDA  
RTLVEACAKIV\*

>SPBDM4\_v1\_70162|ID:27159620| putative Trypsin domain/PDZ domain protein [Uncultured spirochete bdmA 4]  
MKKSHSVLALFVSLGIFIMLNGCVSSPETPSSVDPSQAVAGRIGQLAETDPEQSIAILSD  
VFEIQREKGEPLGNSVIGE QALALFR TSADNIVTLFKKAIQENDLIAARRLSFSVSSIIR  
YASLYDSLEKMLPREFSAIGAPAMRLQLAFLEAE EKFKKHGYVAGKTSLSAALMAEPGLS  
LSAATNSIENLKS VINTKEPLSYRSWAERAKENQDSDAEAWFSALASNKDLGSNSVHV  
PSDDWLSGAVASVVTVYVDRGFKIQSGYSVPDRVLGTAFAQISKGLYLTNYHV IQSEVDPT  
YKGYSRISIRPENPQIKVPAKVIGWDEEMDLALIRSEETAQGTIFLPATMQFQAGDRVF  
AVGSPVGLNSVTAGVVSSLSRKIISYGEAAQIDVPVNEGNSGSPLFSANGVLVGMVFAG  
LPSFQNINFALPAQWLVASLPALFDGKAAIHARLGLMLGKSGQNPLVLADLDSSLSAFR  
AGDVLTMIN DGLSKDIASIQQLAAIPKDALCYVEAQRNFQPIRRLRRICFTDDASLIPA



WDSIQKNTILEGLLGAKLTQLENSNKVGGLYSVQWVCPAEAADEIGLSENDTIKINKFQL  
DRKNKMFIEFSAKSRLSGYFERTIRLEFSSDSATII\*

>SPBDM4\_v1\_70163|ID:27159621|ftsH| protease, ATP-dependent zinc-metallo [Uncultured spirochete bdmA 4]  
MSDQNDNRNDNRPELPQAPKGNRAALAVFFSLIMLFGVYLFFGQKENTKEIPYSSFLSYL  
DLDEVKYVRIIDQRDIDGALKGKNGAEMPFTTRIPYFDSELSMQLQEKDVSITGAISGTS  
PLQILFELTPWIFGFILWIMMRMQGNNKAFSFGKSRAKLYNDSGKKITFNDVAGQKEA  
KYELMEVVDYLKNPKKFKVCMGARIPKGVLLVGMPGTGKTLIAKATAGEANVPPFFHMSGSD  
FVEMFVGVGASRVRDLFEQGRKHAPCIIFIDELDAVGRTRGSGLGGGHDEREQTLNQLV  
EMDGFDTKDGIVVLAATNRPDVLDPALLRGRFDRQVVVAMPDVQERADILKIHMSKVPV  
SGSVDIDKLSRATPGTSGADLANMVNEATLFAIRKNKEIVEMDDFEDARDKILMGVARKS  
LVIADDEKRATAIHESGHALLHYFLPNSDSLHKVTIVPRGRALGLALSPLGKDTYSRTYG  
WLYDRIVISYGGYAAEKIVYGQTTTGAAQDIKQATEIARKMVREWGMAEGIGPISLGEIE  
EPIFLGREIAQHKKDYSEETARKIDAAIQGILNSALEKAMTILKREKDRLLALADKLMQIE  
TLEDKDVRELLSLPEGKVVLEEGTVKC\*

>SPBDM4\_v1\_70164|ID:27159622| protein of unknown function [Uncultured spirochete bdmA 4]  
MKNLEIVVKKKLFSLDFDREKPVAFSGGLDSTVLLNILLQIVDNKKLRAIYVCHNLRP  
KEELAKEILLIKKTCQIMRVRLTLVYIREGAIAYAKQARCGIEAAARRFRYHALARTAQ  
RWNISTIITAHHADDQIETFLMRLLRGGNLGALAGISPSRAIDKTSGVRVVRPLLQIERR  
ELYNIAEKKGLEWSEDSTNEETIFLRNKIRHSLIPYLDSEFPKCSVIGYAPQIRNTQA  
FLHTCAEKHMHAMQKEYRGRPVLDLNLFKKREAVIRLEILKNFLQNFYKHHIGYHALQN  
LDRAISDGALKAEAGGYEFDLTGGFLQFKGRARFSSAPSTRGISFLDSDYREDQYFLKVQ  
APGKYECGAFKLVVAYDSSNTNIPGLAHIVIDESEKIASVKIPISFPFVFRNKKEGDIY  
TEAGIKGIDAIKKSKIPEGTRHLVPLEDKYGIAAVLISTFVKGSTLNAVCRNPSLGEN  
GEIVYILLMLKGDHIINV\*

>SPBDM4\_v1\_70165|ID:27159623|rp1Y| 50S ribosomal protein L25 [Uncultured spirochete bdmA 4]  
MEHIELKVSPREKLTGKELNKARKSGRVPAQLYGKEIAPMSIFLERDDFVNVARRVTESM  
IIDLNLEGKKYAALMKEIQKENISGEILHIDFNLIERGRRIRVKVPLHLVGSAGKGVREGG  
ILEHAIHDIEVECEPDVLPKEIEIDISGLEVNHALHLRDVAIPEGVKLLTNPETVIAIK  
FARAEVEQPAQPEVAEAEGEVPEQAAAEGTSEAVQK\*

>SPBDM4\_v1\_70166|ID:27159624|spoVG| putative septation protein SpoVG [Uncultured spirochete bdmA 4]  
MEVTDIRIRKVSSEGKLKAYVTVTDFDECFVHNVKIIIEGKSGMFIAMPSTRRTKTGEYKDI  
AHPICPDFRSKLQEKILAAYNNSDNPSDTSVPEFD\*

>SPBDM4\_v1\_70167|ID:27159625| putative 4-diphosphocytidyl-2-C-methyl-D-erythritol kinase [Uncultured  
spirochete bdmA 4]  
MKGVEIAAFKINIGLQVFERKPTGYHDIESIFQNVSLADSLRLYINGLGLIVIEGELGG  
CPPDNSSLYHAAMAFDAACGGLMCRKGVSIHIEKGIPAGAGLGGAGADAAATLWGLNELF  
ETRFSQVELARLGERVASDVPFFLFGGAAIVRGRGERISPSPSTDFGLIVLQPPWTSQT  
PEAYMALDSLREKSAHSPRAVIHETSYASCLSDGELETWYRSPIAQWQFKNDFQPVLV  
KKHPLYQELFSILKEHGAAYVSLTGSGSCIFGVFESFDRAHKVAEKCKRISSERAAGDQW  
HAVNIFTVQPLARSMIVSYIQDCNEDTRSDKERPCYGSN\*

>SPBDM4\_v1\_70168|ID:27159626| protein of unknown function [Uncultured spirochete bdmA 4]  
LNLSELTRSLKSASAFHLREQQAINGTL\*

>SPBDM4\_v1\_70169|ID:27159627| protein of unknown function [Uncultured spirochete bdmA 4]  
MNHKTTMTADPQEEFELITLTSNGNSADTIYSLRPTVRFDGAYDDEFDYDNDDDFEDDEDL  
EDDEDLEEDDFEDDEDIDEDLDEDEEDFNDEEDFDEDEDDEDDFDYDDDDTDE\*

>SPBDM4\_v1\_70170|ID:27159628|rsfS| Ribosomal silencing factor RsfS [Uncultured spirochete bdmA 4]  
LDSKAFAYQSAEILAQHNALDVLVMDIREVAGWADYFVLATSTSSTHMRGLQKHIEEFLK  
TEDISLLNKPEVSDDQRWLLMDAGNVVIHIMSDEARQFYDLESLWFNAPRFVVTFFSEKRS

\*

>SPBDM4\_v1\_70171|ID:27159629| conserved protein of unknown function [Uncultured spirochete bdmA 4]  
MSDLKSGMLRRSALPLVLILLVVAIGTFFVRLMQKGTVDTIKKDQPMGILFIFEKDEK  
PVSNQLLIWYPSRRKAAIMDIPGSMGIILKSADKMSGIDSVYDSRNPGRFVKEISDYLFK  
PINGWLTDEKSLAKTVLDLLEGIQIFPEPVMNNEALKDVSPLGGAVVLDGDKTSQYLSY  
SLAADSYSSEINRKQRMLVSLLAQLAQESDIINKNNDIRLIAKEPRSNFSLATREELFRH

FAQIDVDMIITQFISGSFRTFEGRRVLPYDYGELARDVVSQTAKALGAEDTNAMQKTVV  
TIELLNGSGEKGLANSASTLFESYGYQVVSIGNAPSFYAKTVMYDNDGDKTAFQQIANV  
INCKNFGDAAVLPGLRKANITVILGKDFNGRYCVGQ\*

>SPBDM4\_v1\_70172|ID:27159630| conserved protein of unknown function [Uncultured spirochete bdmA 4]  
MLSDRFGVDKEASYLAGLSHDMCRELSFEEQEGLVDRHGACIAFLRERPSMKALFSDTVY  
KKKMMHGPAACMLCHEFGMREPDILEAVTLHSIADEKMSDLAKIVYISDKLEPLRNRPH  
DADEKLHTLDLDSLFVYTIACVVRWFSETSEPLSPFTADLYSRMLK\*

>SPBDM4\_v1\_70173|ID:27159631|nadD| putative nicotinate-nucleotide adenylyltransferase [Uncultured spirochete bdmA 4]

MRIIVGGSFNPPHIGHLILAEVLAATRNVDKVLIPANLPPHKVPQHDPGAKMRLVMLS  
ASIEGWQEIIVEPCELQRQGISYTIDTLREIPQKYNCDGKPGLIIGDDLALDFLTAWKNP  
EKILDADLIIAHLRYAEKVNLAYPHRYIDNIIPISSSLVRERIAQRGAWRSLVMRVR  
ETIETHGLYRNT\*

>SPBDM4\_v1\_70174|ID:27159632|obgE| GTPase involved in cell partitioning and DNA repair [Uncultured spirochete bdmA 4]

VIKFADEAIITVASGKGGDGCVAFRREKFIPLGGPAGGDGGRGGDVIFVLKRNLRTLAYL  
RYRQVFKAQNGQPGMGKNMHGGDGEDVVIEVPPGTIVRDADTDEILKDFSARRGRDGN  
SSDEELWFFLKGGKGGWGNTHFKNSVNQAPRFAQPGQPGQERRLKVLSLIADIGLVGFP  
NAGKSSLLDYFTNARPKIAPYPTTKIPNLGVLTVNERDVIIADIPGIIEGAHEGAGLGL  
RFLKHVARTACLAFLIDLSEENWRIAFTLLRELDLFSPELAKKPRILLGTMKMDLPEAQE  
HFAKFKATFPRENVYGISVFSGFGLDALKQVFFEQVVEYETREEGKESIAERLFDEIEFD  
DEGLYE\*

>SPBDM4\_v1\_70175|ID:27159633|rpmA| 50S ribosomal subunit protein L27 [Uncultured spirochete bdmA 4]  
MPHKGVNDRSNPQHLGVKAYASEQISAGTIIVRQRGRINAGRNVMGMKDDTLFALVDG  
SVRFREYKGGKFFVDVEPAAQA\*

>SPBDM4\_v1\_70176|ID:27159634|rplU| 50S ribosomal protein L21 [Uncultured spirochete bdmA 4]  
MYAVVEINGKQYRAEQGKNLVDRFSATPGESVVFEEKVLLGGENTAVGTPYVAGAAVKA  
TVNEETKGDKVVVFKYMPKKGYRKTQGHRQLYTVLTVNEIVSA\*

>SPBDM4\_v1\_70177|ID:27159635|argS| Arginine--tRNA ligase [Uncultured spirochete bdmA 4]  
MEHYVDQWKSIIAAHLNAFAREKGFADYQLSPHEIIAEKPPKPELGDVGFPLFSYAKQFR  
MAPAQIAFEIADREHDMPPGGNIERDWPGNLKA VGPYLVNVDLDRTRAVEYLLAHTEKYSWG  
SSPFFNGHKIMVEFSCPNTNKPLHLGHLRNNVLGESLARIMKAAGA EVKKVDLINDRGIH  
ICKSMLAYLAYGENRSPEDGLKSDHFVKGYYVLFNKLKEEDPQAEQKAQELLQKWEAGD  
PEVIALWKKMNDWAVEGIMATYKRQQVSFDEFHFEHETYKLGKKEVLDGLARGIFYRGE  
GAIWVDLEDLGLGKKVLLRKDGTSIYITQDIGTAIMRHERWSFDEL VYV VASEQQYHFKV  
LFEVLRRLGYEWAANLYHLSYGLVNLP SGRMKTREGTVVDADDLIDELAKLAAHEIVEKG  
RMDAVGDIQSVAEKIALGALHYFLLQVSPNKDMLYNPEQSL SFTGDTGPYIQYMGARASS  
ILRKYEQGEGNASRGHPEAALLASDADWPLVRQLMELPSTIEQSARNKDPSILAGYAHAV  
ASEFSAWYRDNPNV LNDNANLSASRIALVRAVQSTLRQTSELLCMPFLEAM\*

>SPBDM4\_v1\_70178|ID:27159636| conserved protein of unknown function [Uncultured spirochete bdmA 4]  
LITRDELEARLQYLGPALRQEKEGTVLAVTVIPHAPHNVVAGFRNGSLLVKVSAAPEKGGK  
ANEAVLELIADFLGTAPSNLLLLRGHTSRSKIILLQNMG\*

>SPBDM4\_v1\_70179|ID:27159637|ligA| DNA ligase [Uncultured spirochete bdmA 4]  
MRDILRVKYGATALRARELEALIKHNQEL YNNGEPEISDEEFDALWDELASIDPGNPLFA  
SIGADRSERWPKYRHRMTMGSLSKATDPESFLVWAAKAGYRLYL VQYKLDGASMELQYDD  
GRFVRGITRGDGEIGDDITQNVMRMNGV PKKLAEPFTGAVRGEVLMSRNIHATKYADKAN  
CRNAANGLMKRKDGKGAEDLDIICYDAV GSLPAGAAFSTEREKISWLQRMGFNVVPTTER  
ESPEEVVAYRAKIMDIRAALPYDIDGLVVKGDRIDPKDASKLRPELQIAFKFSPEEA VTT  
LIGVEWSESGATVTPIGVVEPVRLAGTTVQRANLANPGMIRAMD L RIRSKVVITKRGEII  
PKIESLVENPPDAMPIPIPTRCSLCGTELIDEDTRL YCPNPEC PGKAYHRLEKWLSVINI  
KDIGSALLKRLFDAGKVVHIPDLYLLTVADLLSFERMGEKSAQKIIRNIKAQSEVSLSQF  
LAGFDVEGIGMLMADRLIAAGYDTL DKILLAPWSDFADIDGFAEVTAKALYNGLRLVEGD  
MRELVDKGFVRIQTPKSAVSANASPVAGKNFCFTGELTAMKRSEAEKLV RDNGGFVKSGV  
TKDLDYLV TNDPASGSEKNRKAQEFSVQIINEAQFLAMLGREVH\*

>SPBDM4\_v1\_70180|ID:27159638| NGN domain-containing protein [Uncultured spirochete bdmA 4]  
MRYFAIQIATRREDDWLKRIQPQIKDVKFHKIMKKMYIRRKGKTKLEDAPVFPGYIFFEN  
EDDSLPTDIIHDLRHSRFFIRFLPNNESPRSLNNRDSAIRHFIHFGSLIPPSLVKFDEN  
QKIKVIQGPLQGIEGFITKVDRRKHRAKVRILTIAESVMILDLAFEVMEGETIGAGSQDTH  
HEKQ\*

>SPBDM4\_v1\_70181|ID:27159639| protein of unknown function [Uncultured spirochete bdmA 4]  
MKS NESIPFEQISVPGMLYACMVRAGSDIGQIRAIRTPPLPERYSLITADQLPFRNELWI  
GDMSIPLFAARSVS YRGEAVGLIIGPDPLMVEELASTSVVECEERE PFLDWHSFSSSHIA  
ARIDFSRRKPAESDRSADKASLGERSTPAKTLEFSSYLNIEPHELT FHSGIGALAEWDYD  
KLKLACPTLWPEHVRSCIARMLDASMD DIEISMLQMYDSEL YSWYPSLLAARATAAAWA  
LKKPVKLVSGKREKKFLPCVHG ISHLKSKWSKDTRQLLHVECRFAIPIGAYSIFAQLL  
LEKTAHFAAGSIPETPISITGFAIRTDMPMGALESISAAAIYGMIEAH IARASRAMDSG  
LLELSQSTFSKKEFSKNAHKNAEKEIPAVKIARPLL RQTD FYRKYAAAYEQIHKRNPGEKE  
ATLRAVSFSLAYQNSQALLPAGAHKVQIQ LMLDRNLKAVLES DAA YSSERLKTALRLQIS  
QNLKIAAAHISFENMQRPHPGSIPLISSGMAIVSDLARRASDR IQRMRFRREALPLAVRT  
YSIVKQSETLKKISGSPLRPSIGAAILEVEYDTRTAIMQQVRLDISVFAGKILSRALAKS  
TIRSASIEALRSCLVCTYPEQKDHNDIYDSILSQSIINVDIMEDEKASIPRPLGDLAYAL  
VLSCFLGV LQQMND SNRLMLPFRPASSVSVSGDMR\*

>SPBDM4\_v1\_70182|ID:27159640| conserved protein of unknown function [Uncultured spirochete bdmA 4]  
MNIEFN LNSTQKVSITSAERALDVLVRQCNIKSLSGACLEGQCGSCLILIDDRPAYSCI  
MPALLLRDRRVETIENFTKTREYSLLYSEINKGGTAVCSSRQNAIMLMGMALVRRTLAPA  
QDEIFSTLANAYCDCLAPEDFANA VLN TIQHLATARKTP\*

>SPBDM4\_v1\_70183|ID:27159641| protein of unknown function [Uncultured spirochete bdmA 4]  
MTLSEIHYPHNLQELLLL LEREKKVQIIAGGTTFGYI QASRYLSFEPSIAYIQHIPELTS  
IHKTERMISFGAACTLSELEHVYPFEHKQTKELMHTIATS AVRNIATIGGHLMYEKRFLT  
LWALLACLDAELEFKAFSKTSSKNIWYLANESGLPAIESDKLLTRIRIPLQSIDHLFIKR  
IGGSIFPDGDGAYLVSAATVDRSSIANFKLVIAGARAYRDYDAEQRIISAPYPLPTKILQ  
NVL RMYAESLRKSNFWNV ELLPLISQALEDMQR SNR\*

>SPBDM4\_v1\_70184|ID:27159642| mfd| Transcription-repair-coupling factor [Uncultured spirochete bdmA 4]  
MKPDSLQALFDKISRNSALRMVREQLERGTLPVHIQNSENPLLA FSLVPLVRHTGKKCIV  
VLPSDQEAEDFGQDLALTDTKLLL FPSWPGAPYRAIPARSRMFSERTSALAKLAEGDFEI  
AVVSARTLAIPVPPPEYMR AHTSLLKVGALFEPTAVSNRLAELGYFRVPSVSLPGEYAMR  
GEVLDVYMPGDELAVRVHFD FRIEKIVRFDPETQSGNEKIGQVHIRPLKEVIWDMTALS  
YLRQHSLEFAQSEPRLEQVLEALNAGREMPGEEFWFPLAFDRA YSLIDYADSNTVFVVVA  
RERIDSLSETIRKEYASMYRLALHETIVPPPHKIVFNISELLSSV SAAIFCYALKGIDAV  
AERISLGAEP PRSYFGNIRLFKEELAGFKRDQYRTWIFASTEPQAERIASLIQDD SITIA  
QGPISSGFNLPALKLRVLAHELFGR RKHVPRSLARAKSAAIESFIELTPGDYVHVNYG  
IGRFNGIERLTVLGLERDYIRIDYAGDEKVFVPIEQANLVQRYIGNEGEAPRLDSLGSKA  
WENRKKRVSKSVEELAERLIRIYARRKAARGFVFPDSDWQIQFEATFPFEETEDQLRCI  
EDVKHDMESPKPMDRLVCGDVGF GKTEIAMRACFKAVTAGKQVAFLAPTTILAEQHYENF  
LERIGEFPLRV ELLSRLIDKKTQNAIIKGLSEGSVDMVIGTHRILQKDVRFKDLGLLVID  
EEQRFVGDKERL KEMKAGIDCLTLTATPIPRTLHMSLLKIRDMSVLQTPPMERQSIQTF  
VEEFSLELVARAIRNEMARGGQVFY LHNRIETLPEVEQFIRQLVPEALVESAHGKMDARD  
LESIMHRFIHGAFHVLVSTTIENGIDIPNVNTIIDRADNYGISQLYQLKGRVGRSDRQ  
AYAYLLYPDKRALSELAMKRLQIISDFTELGSGFKIAMKDLEVRGAGNLLGREQSGDIYA  
VGFDLYLKLLEAVSRLSGMGQGE EEPYLELEYSGFIPDGYISIPMIKMEIYKRIASVQS  
QEEIDSLHEELIERFGPLPEEALSLLSLAEMRVL CRKLSISSLRERN GIVSVEFSK VSKI  
SVEKILRLIRESSGAIRLSPEKPNAIQITKAIGLKEKSAYLKERLSFLAG\*

>SPBDM4\_v1\_70185|ID:27159643| protein of unknown function [Uncultured spirochete bdmA 4]  
MLVLLLEENSIANLV LKALHDSEVNALRYRDPLRVLDYIAELEPDAVIVRQKDFPLHEQ  
LLAALIQFYKPLQRCKMIVLGKEDAPFSSCTFIKEEAFLKDPSLLLA AFSGATHVSLHGG  
SRLVAKAQRMVKE\*

>SPBDM4\_v1\_70186|ID:27159644| Regulatory protein ArsR [Uncultured spirochete bdmA 4]  
MDTTPKPCNEKQLLPYAQKYKAIGHPIRLKILCLIAQQDVPCVGD IWRCLDQPQPVSQH

LAILKRNGIVASEVKKTRRIYSISDPFIKNLIDSMITEICADSDDASTK\*

>SPBDM4\_v1\_70187|ID:27159645|ispG| 4-hydroxy-3-methylbut-2-en-1-yl diphosphate synthase [Uncultured spirochete bdmA 4]

MSPTKAIKVGNVLMGAEWPVSIQTMWKDPLPVFSGYDDPRLPPIIERISDLKRLGCHIIR  
FAVPDISAAESLGLLAGRSPMPIVADIHFDWRIALRCMDFPVAKIRINPGNIGAWEKVVRE  
VAAKAMDKGIPIRIGINGGSLPVDLAQEEHDTVSAALKAAEREIEVLESMHFSDIVVSLK  
MNQPDEVVRANEEFASRYPYPLHLGVTEAGPLVAGVVRNTAALVPLLKQGIGATIRVSIS  
DSMEQEVLAGKEILACAGKNAHGVRIVSCPRCGRASFDTHAFTSRWMNRLYSIDADISVA  
IMGCVVNGPGEARHADLGITGAGNSVLIFKHGEIIRKIDARDADAAAFQEELSKLTREKSE  
QGRLFARQK\*

>SPBDM4\_v1\_70188|ID:27159646| V-type sodium ATPase, K subunit [Uncultured spirochete bdmA 4]

MNIALIGAACVLGLSATGSGIGAGIAGMAAIGSWKRSYLNKAASFLLVAFAGAPLTQTI  
YGFILMGRINSSKDPLLLASGVMSGLAIGMSAVAQGKAAAAGCDAYGETGKGFANYIT  
VVGLCETVALFVLAFTFSAI\*

>SPBDM4\_v1\_70189|ID:27159647| putative V-type ATP synthase subunit I 1 [Uncultured spirochete bdmA 4]

MIVPMKKFYLIVLDKDRKDVPKRLRKLGVAHIEELQGSGETYQSLERERSEVESAYFLQ  
NYIGKKSXSGSPKSLSPLEVDGVKSLVQEVSGLKREMDSLNERTNQLVREIERVESWGDV  
SAAALVEVNNGSGFSLRFFEAPLKEIASLPKELEYMGLCAPKGLRIALVLGESEKVP  
PPSFQEFQLPEFSVSQMRQEIVSVERRKKEIAQAFKDRSEKTPFIEKYLQELES  
DIVLERLRSGMPNQEHFAYLQGYVPARDCDKFKKIVAKYGWAIADFDDPSDEENPPTL  
VENPPAIRIDPVFEFLGTVPNYHEYDISFWFLIFFALFVAMIFGDGGYGTLLIVLASL  
GSIVLGRKGRHASDAQKFLVLGIVTVLWGALTASWFGIRFDQLPKMLQKISLNLINGQ  
SPDSESNIKVFCFIHLVQLSIAHMKNIRRDFFPNLKFLSQIGSLLLLAGMFNAALNL  
VIDATRFPIRSWALWCIAAGFFLVFLFGNWNGKLGPSLLESKGLIPTFLNTVSVFADIV  
SYIRLWAVGLAGLAISQTVNGMASGILGGAPGILLEFILKLLIAILLLVSHSLNFMLT  
VLSVVVHGVRLNMLEFSGHLGMEWSGYKYDPLREQNRPSAAMESSLEETGV\*

>SPBDM4\_v1\_70190|ID:27159648|atpD| V-type ATP synthase subunit D 1 [Uncultured spirochete bdmA 4]

MAKIKLTKNELKKEKDALKMYQRYLPTLQLKKQQLQVEVRSVQTRLEQLARKATLEKEY  
DVWVAVFSEQQKARTLDGEPLLRISLKTDTGNIAGVAIPIFQDVEFERLAYDLYATPPW  
VDSALTLMEQLLRTGMELEVVSROGDLLAHELRIITQRVNLFEKVKIPETIADIRKIRIY  
LGDQQTAAQVVRGKIAKRKVEGAER\*

>SPBDM4\_v1\_70191|ID:27159649|atpB| V-type ATP synthase beta chain [Uncultured spirochete bdmA 4]

MNKIYSRIESIVGNVIAVKAQDIAYGELAQVKTRYGMSLAETIRLDGDMVYLQVFAGGRG  
VSTGDEVRFGLGHPMQVSFSDNLMGRIFDGAGEPRDGGPVLSDNLITIAGPAVNPKRIIP  
REMIRTGIPMIDVFNTLVKSQKLPIFSVSGEPYNPLLARIAMQAEVDLIVLGGMGLKYDD  
YLFFRDTLEQGGALSKTIMFVHTAADPIVECLMVPDISLAVAERFALKGKNVLVLLTDMT  
NFADALKEIAITQEQVPSNRGYPGDLYSQLAARYEKAVDSDAGSITILAVTTMPGDDVT  
HPVPDNTGYITEGQFYLHGGHIEPFGSLRSLKQMVNGKTRDDHRSIMDAMIKLFAYRDT  
LEKKSMTGFQMSAWDRKLLKYGELFEQRMMDLVNIPLKALDQCWGLAECFEPRETGLR  
SDLIQKFWVGNE\*

>SPBDM4\_v1\_70192|ID:27159650|atpA| V-type ATP synthase alpha chain [Uncultured spirochete bdmA 4]

MTEGFVTAVNGNMVSVNTDGIVTMNEVAYIETGDRSLKSEVIRIRGDSVQVQVYEITKGI  
RVGNKVRFTNDLLSVELGPGLLGQIYDGLQNPLPKIAERVGYFLEPGLYLKALPRDVKWH  
FTPLVKEGDLLQRGMAVGVVPELHFHFKHIIMLPFDIFYGEWSITKILPEGDYTIDDVIAEVA  
DVKGNKKQVRMWFSWPVKRAVDCYSERLRPTDPLVTKTRIIDTFFPVAKGGTYCIPGPF  
GAGKTVLQQVTSRHAEVDIVLIAACGERAGEVVETLKEFPQIIDPKTGRSLMERTVIICNT  
SSMPVAAREASVYTAVTIAEYYRQMGLDVLLADSTSRWAQAMREMSGRLEEIPGEEAFP  
AYLESVIAAFYERAGIVKLYDGKTGSVTIGGTISPAGGNFEEPVTQATLKVVGFHGLSR  
ERSDARKYPSIHPLDSWSKYEGIMPKHAVQYAHSLERGAEVGAMMKVVGEEGTSLEDYV  
VYLKSEFLDAVYLQNSFDPVDASVSPSRQKYVFKLVLRILASRIVFQEKEDARNFFYEL  
RQTMLDLNGTPEDSDMFDSL YKKIEQALAEKPEFETRGLKAIRTLE\*

>SPBDM4\_v1\_70193|ID:27159651| conserved protein of unknown function [Uncultured spirochete bdmA 4]

MKRYWYFASTLTSFPGAPPISVEEFDVLC SRLVEKDEMEFIRHVEEVRTGEYSDCIEK  
SSFLKAYFEWERGVRNALVMLRARANKWDAEQWTRPGSISADALQAAQTVYAASNPLQAE

LAFEHERWDAIERLSSLSAFELDSILAYKMKLLIATRCVSFDKERGREGFKVLYQDIMNA  
AAGAASSALDTGVAT\*

>SPBDM4\_v1\_70194|ID:27159652| putative V-type ATP synthase subunit E [Uncultured spirochete bdmA 4]  
MEIQVQELLERIRSEGIETAKQQAEEIIQKAQSEASEIVSRAKKEAEEVQDEASRRIDSM  
EAASRASLLQASRDTMIALKQSIQRFIDAAISVDVDNAFDEKMAIQVIPEVLKALALNQS  
VDTEILLPPALIQQIDASLSARLAKELSKGVTFKPYPSIDAGFRVAQVGSAAQYDFSAES  
LAQILSARVNSLLSEYLKEASGSLE\*

>SPBDM4\_v1\_70195|ID:27159653| protein of unknown function [Uncultured spirochete bdmA 4]  
MGVEPTSPA WKAGVIAVIRRSRYKIRRFSRHFKKVTLVPLRLLLTTGGTVAPECAPSRYDG  
RDQNASLFATCPKANPMDEGLIVWRSSCQVVDKP\*

>SPBDM4\_v1\_70196|ID:27159654| protein of unknown function [Uncultured spirochete bdmA 4]  
MTAIRVVHDTSSFSLDFWNISNRIYYVLKNGQSQVENNFYSITF\*

>SPBDM4\_v1\_70197|ID:27159655|mgdB| Magnesium-transporting ATPase, P-type 1 [Uncultured spirochete bdmA 4]  
MTKFHLPLSFPQKKGERRNGNISSEENRLISLCATSIERAFSELDTSPRGLSEKEADDR  
LSEFGRNEVSQKELSFWE DIFERFKSPLVIQLLIIATVSAIVGEATSIIIVGMMILLSV  
GLSYILDGRSNREVKSLGKRVQSRTYILRDGTETEIRMSEVVPGDVLLQAGAIVPADVR  
VISAKDFFVSESALTGESMPVEKSANPSSAPVRSALEMPNACFMGTSVTSGTARAVVVT  
GHTLFGAISKKLSERREETSFDKGVRSFTWLMIRLMLVMVSVVFLIVGLTKGNWLEALL  
FALSVAVGLTPEMLPMIVTVNLAKGALAMAKKKVIVKKLPSIQNLG AIDILCTDKTGTLT  
QDRVVLEHHVDIIGNKSEEVLYAYLNSYFQTGLKNLLDRAVIEHVDLNVDECRLVDEL  
FDFQRRMSVVVEYEGDNVLICKGAVEEYSCCTHYQIDEEIYPLIDMIRADLFEEVQKL  
NEEGFRVLGIA YREFTREKMTFTVQDESQ LILLGYAFIDPPKESATEAIQLLTKAGVEV  
KVLTDGNGLVTEKVCKDVGIPFSSAITGAELNALDRAAFSTKVKECEVFVKLTPSQKEEI  
VRELKQGHVVG YMGDGIN DATALKAADVGISVDSAVDVAKEAADIVLLEKSLLVLEEGI  
MEGRRIFANIIKYIRMGASSNFGNMFSVVGASYLLPFLPMQPLQILTNNLLYDFSQTGIP  
MDNVDPELVAKPVKWDINNIKRFMVCVGPISIFDYATFALMWFFFHANGYLDPVL SAAQ  
KDTMARLFQTGW FVESLLTQTLIVHIIRTRRIPFFQSRASVPMILTTLTVMAMGVWLPYS  
PLATMLGLVPLPGIYWLWISGFLVSYIITHKVKRWFLRRFEGV\*

>SPBDM4\_v1\_70198|ID:27159656| putative PTS IIA-like nitrogen-regulatory protein PtsN [Uncultured spirochete bdmA 4]  
MDSILDALQEGRLFELPENDINGKNHALQFLAHIIIEAFPQIPTGTDIVGNVMAREKSMHTALG  
RGWACPHARVEFEEDLMCVVGWSPTGIDYGAPDGIPVSLITMYLVPSNQRNHYLREVSIM  
AKVLKSLPETDKLPSIKELNDVRNYLLDLIAASKETIGPDARARMIRLQSKAAMATQPVS  
DLSSLIIIEPVSIAGAGLRPLALTQNLELMNFIEGTAGLTERLDADGSYQNGLWRIVRRS  
ATAFQGSRTVFDICIALMPAKTAQK\*

>SPBDM4\_v1\_70199|ID:27159657| Translation elongation factor G [Uncultured spirochete bdmA 4]  
MSYTTEQIRNIAIIGHGGTGKTTLEHILFQGGMISKPETVDSGKTVSDYGDDEIARKIS  
VRSSLTHVNDDCKINLIDAPGAGDFVGEAILAIRAAETALLVIDGKSGVQIETIKLWRL  
LERHQKPRMV FVTRLDEERANYEAALADIKEKFRAAPVPLTIPMGEGPSFKGVIDVLNRK  
AYMRPSSH DQKEQIGEVPT EFADAVESARGQLFEAAAEGTDELMEKYLLEGELTQEDTLS  
GLQKALAAAGKIIPAFAGAGLANSGASAFIDFVVHVSVPSP LFRAPEKAQDQDGNQTEIAID  
PSKPASAFVFKTQIDQFSGRLCYIKVMTGSFVDPMDMVITRDAHKERTGKLYAMQGKKLE  
EVSSLPAGDLGILAKITTLKTNDTISQPDQLISYIPLRLPSPVHMLAISAINKKEEDKLN  
ELLYKAAEEDLTFRVNYNPETKETVIAGMGEQQINMILDKIKAQSKIVAETRVPRVAYRE  
TITKNATAEYTHKKQTGGHGQYGRVVFEIEPLERGGKYEFENRIFGGAVSRGFMPGIEKG  
IHQAMEAGVLAGYPVDAKTAIIDGKEHPVDSSEMAFKIAARGAFREAMRQANPVLLEPI  
MNL SVFVEEKYLG DVMSDL SGRRGKISGQNPIGGGIVQIDAQVPQAELLRYAIDLRSM TS  
GTGSFEIEFSHYAPISGKIAEDVIKAAQAFKTQEAEEE\*

>SPBDM4\_v1\_70200|ID:27159658|nrdR| Transcriptional repressor NrdR [Uncultured spirochete bdmA 4]  
MKCPYCGSLEDKVIDSRTLANGEAIRRRRECLSCGLRFTSYERIEEKPLLVIKRDGRREP  
FERQKIERGLVRALEKRPVSQMSIENLINEIEDEAAEHAKTSNEISSEELGRMVLRQLYS  
LDKVAYIRFASVYRK YDTLDEFIREIERLEKGQTA\*

>SPBDM4\_v1\_70201|ID:27159659| protein of unknown function [Uncultured spirochete bdmA 4]  
VFGSLVLYLVDEIFDGH LGHGSFFEGADKTA FNFLPLKRLAPAVTLNHQKRFLLDALVTC

KS\*

>SPBDM4\_v1\_70202|ID:27159660| SPFH domain, Band 7 family protein [Uncultured spirochete bdmA 4]  
MSLIYAGFAVLAAWWVIVVAIGRQKMPVFLFLLVFFAWAVPEVLLIAKKPEIATGLL  
VVPFIILIQMMRVIPEYQRGVLFRLGRMQKVIQPGFNLILPFSLDIMRKVDMRTFTIDVS  
KQEITRDNVAVIVDAVVYFNVFDPVLA VVKVADYTKSTSLLAQTILRSVLGQHELDEML  
AKRAELGQILQKLLDEATDPWGIKVS AVEIKAVELEDTMKRAIARQAEAERERRAKIIAA  
EGELQASEKLAQAADVLSKSPSSLQLRYLQTLTEIAVEKNSTIIFPLPMEFLNAVSKLAG  
KGAE\*

>SPBDM4\_v1\_70203|ID:27159661| conserved protein of unknown function [Uncultured spirochete bdmA 4]  
MNFSEKLLKFMGNSVDASKEILEKAADQAQVWGEMGKLEILQLRSKAQTLTARLGTEV  
YTLLEKNEPVISSSTPEIEPIIKELELDHVIDEKETLYKSKGGKESDLNEKVKE\*

>SPBDM4\_v1\_70204|ID:27159662| Fmu (Sun) domain protein [Uncultured spirochete bdmA 4]  
MAGFRDFDAFYKTLYGDRWESLRRALLGHNDVGLRFNMKHEIEFLENPPEGVYRMDRAS  
VQAAKALHLPSEGTVLDACAAPGGKTLVLAGGSGPQVHIEANELSAERRRRMREVLKAHL  
PEAIRSRIRVTGYDAARLCRIRKDWYDAILLDAPCSSERHVLNSPHALSEWTGARTRQLA  
VRQWSLLSSCFLMLKPGGCLVYSTCSISRLENDGVMQRLVEKYGDRCNIVNGEWGERTAY  
GAIVLPDTSSGAGPLYVAHIHKKA\*

>SPBDM4\_v1\_70205|ID:27159663| HAD-superfamily hydrolase, subfamily IA, variant 3 [Uncultured spirochete bdmA 4]

MTSKVPDLVAFDLGTLADTIEDIAASVNRVLSQFDLPPHETAAYTQMVGDFRSLIERA  
LPPEKLNDEALLQQVFECVHEYAHSLENTRPFGAIDMLEILTQKDIRLAVLSNKPDA  
MSKAIVQSLFGNIPFVAVWGNSPERPRKPNPSALLEICSLAKARPQQSLFIGDSGVDMMKT  
AKAADMIAIGALYGYRSREELEKAGADFLISSPLELLSLIGMA\*

>SPBDM4\_v1\_70206|ID:27159664|pgcA| Phosphoglucomutase [Uncultured spirochete bdmA 4]  
MNREEIIVRAQDYIAHETDSFFSDEVKALLQKGDWQELEDRFYRDLEFGTGGLRGVIGGG  
FNRMNTLVVTRATQGLCDYIKEQFPNKPLSACIAYDSRRKSKEFSLATALVFAANGIKAY  
LFPSLRPTPELSYAIRMLGADTGIVVTASHNPPQYNGYKAYWNDGSQVPPHDTGIIKVV  
LKVVRTVNIIAEEQARAKGLLVNIDEEIDDAYVRMVKAHLMRPELFAQLGKSVNIVYTPLH  
GTGAILFERIMRDLGLNVLTVPQEREPNGEFPTVSYPNPEEAAALAMAIELGKKTHADV  
MATDPDADRLGIAVPDGAGGYTLVTGNQLGTLHLDYIALTLKELGKMPPHPAAIRSIVTT  
EFQKAIKNGIASFECLTGFKWIADLMRRFEHEKYDFIYATEESYGHLEQEVKDKGI  
SAAALTAEMTLYWRSGKSLDRLEDLYREYGYEYEEKGLSFYFEGEQGMQIMKGMDSYR  
KEQPQFGGLAVIRTRDIKTGIERDRNGKQDKVDLPQSDVIQWRLEDETLLTVRPSGTEP  
KIKYYILCHGQSGKLPASKEMVQKQIALIEADIRTVIDPHRK\*

>SPBDM4\_v1\_70207|ID:27159665| putative DNA-directed DNA polymerase [Uncultured spirochete bdmA 4]  
MTDEKGAPLWTSFLGERREARTPPAPWYKNEAGVWKGLSWPLPACDEEPWEERHYVALDV  
ETTGLNAETGNIVEIALVRFFFDNEGALNEEDRFSTLINPAATIPAQASRIHGITNEDVA  
NAPLFDLAKKIADTCNQRVIVGHNVLFDIGFLEKEFWRANIEAEFQECADTFGMAKLAF  
PSMPSYNLGKLAFAIGLGSDAQHRALGDALTCMRLFAASIRVLTNNC\*

>SPBDM4\_v1\_70208|ID:27159666| exported protein of unknown function [Uncultured spirochete bdmA 4]  
VWFRIKYGLAIVFFIFIVLGLRFAMLALNPYPDTVGSTQSSRNSSSGHDFYENLSMLEPA  
RIHQISSQTAGVIAKNTATEGINMGYDSKSLAAMLIPSSGHILAMLIDDKDSEYQNLGD  
VSYPAKL\*

>SPBDM4\_v1\_70209|ID:27159667| protein of unknown function [Uncultured spirochete bdmA 4]  
MNTLRSRYESIFDSLYTSLKDYTPSVPPEWLEKDAGYWRGDVTLPLGLFTLPRAEGLDYSH  
TFALDIFLKNVEYLPGNVQRGPMIHSLSDGIVVAEAGGWIGFPRTSQSLSFIEGGISPKS  
GNGVIVYSPDEQRYYLYFHLYNVLVEKQIIRRGQALGYGGNTGINARKKGGGDHLHLEI  
FDARNGNSFRNTQIALLRESSRKRPAVSSE\*

>SPBDM4\_v1\_70210|ID:27159668| putative Glucokinase [Uncultured spirochete bdmA 4]  
MSKLFLVGDVGGTNTNLALAKHDQSGIHLVRKARFSTQKEKSLAPVERFLEAAREQGFV  
DIIDFCCISGAGPVQPDESIQLTNAPWSIQASELSSVLKIPVKLINDFTALS YAVTLLDY  
RDTDAVTQLPHPDGSLEYPRDGIMLVIGAGTGLGVGFVDRIGNNIVAFPSEGGHSEMPCF  
DDL SHA VHRWLSNKYGY SAG AELVISGQGIANIFEFVCSDEF RVQMLTSDYAVSHAALTT  
GLSETAKHILALPRPEWPANIALHAENDVFCTLAMELFGRLYALKAANLASIFLPAGGIW

LAGGISSKNEAWLLKNARFMRWFEKNYAPHIRQFLAHTPV LIVKNYDISLLGAAVAALQL SAHD\*

>SPBDM4\_v1\_70211|ID:27159669| conserved protein of unknown function [Uncultured spirochete bdmA 4]  
MTEQDIYPALRDDMIAKHVDIRLTL DILNRYNSGELDHFAKIIPDGIPPIDGIGVVDIRD  
KSPDRVLFKFKQKTLANLEKMILPPNGPHHGKSTL FERKERGETSLLFRAKALEEIGL  
RILGRCA YGVLNGGSATS YADLKKNRAIDEALFTALGPLFERFAGQCKEMP KGLTPAYIN  
PDGAPGANFLELKMRRARLLAARQLHLKPATETPFMPLFQMTSTANHEQLMRAYENIQTSP  
FLGSLAAEVGLKPSEWLSGIQPMIAAYTHSAEGRPKRIFDRA YGKEHSALALPGGHGQSF  
MVLADILRGLQKKG VRYAMLSNIDNIGAYIDPVELAILAISGKPAGFDFSFKTPVDV KGG  
ILVRAKDGS RNVVDIGPAIELREVERLEQEGASILFNCATGIFDLDWLVPHLEELTKNLP  
VRFSDQNKDAGTYSQAEQVTWEVVSLLPDFTAFAVDKRRFLAAKMLAEMLLTSGFGIDD  
ESVPSQLRETGKALHEGQTWLEHVYGLRRVNGRWWPRELARY\*

>SPBDM4\_v1\_70212|ID:27159670|lon| Lon protease [Uncultured spirochete bdmA 4]  
MSASELIPIDQILPNKLPVITLVGKPIFGIFTPI MIGKEPDIQLIEQAISADGMIGLVL  
QKEDSDESSSTNLFQVGTA AKIKKINLPDGGINIFISTFKRFRKIKKYISKEPPIIAIN  
YLDDANFDTDEVKALTRALISEMKQLSENNPLFSEEMRLNMINIDNPGKIADFIASILNI  
EKKEQQDILETL D VRERMEKVLIHISKEKELLRIQKKVQAEINEKIEKSQREYFLREELK  
TIKQELGMAPDARSSDYQFRDKIDSFQFDGEIKEIVEQELEKFNLMEPSSEY MVTRNW  
LDLVC SLPWNNELSSDFDIRRAQK VLEEDHYGLKDVKDRIIEYLA VRKLLKKNTRGTILCL  
VGPPGVGKTSVGRSVARALGKQFFRFSVGGMRDEAEIKGHRRTYVGALPGKIIQGLKIAK  
SRDPVFMIDEIDKMGISYQGD PSSALLEALDPEQNF SFRDHYL DLPFDISNIFFIVTANT  
LDTIPRPLDRMEVIQLPGYVDVEKIEIARHYLIPRSLERSGLAKNQVKYTRDALLAID  
GYAREAGVRNLEKALDKTHRKIAKSIVIENKQEEKFIIDKHSVEKYL GKPVFRDDELKRA  
TRPGMAVGLAWTSMGGDTLIEAMANPGKEGFKLTGQMGSVMQESAGIAYTYVRNIVAQK  
YGIEAQFFESRQIHLHIPEGATPKDGPSAGITMATTLLSLV LNKRIKDRLAMT GELSLTG  
QVLPIGGLREKTVAAKRNKIKEIIPAANEKDLEEIPEHVKKGLTFHPVSRMEEVIDIVF  
GT\*

>SPBDM4\_v1\_70213|ID:27159671| putative Adenosine kinase [Uncultured spirochete bdmA 4]  
VKTVVNSRFLGIGHAMCDISAELDVQ TWNAFRAAFS WLASGAPVHLDAAQA HGVSYLEE  
RAAQGQGNISYAAGGSALNAVRVASLLGT KAAFAGCVGNDEC GDVIRAGLKSAGVEALLD  
TSGGQGSTGMFCTVSPMTETVSGQNA TEEAVSERIIASPSVARRVRDLDFDGF DVEKVE  
LIHAEGLLADSPRNLEQLFQRAHRM KKMISIDVVSSEAARRNKDTLKR LIQSYADVFVFCN  
KSEFEALDVNIANYRSDIVVVIKADRAGVDCFASGQRIHADAPQCTV VDDL GAGDAFAGA  
FLSGMLVGLPVDRCLQLGT KAAACALQSRGTEPDEHCLRALSQDILAE\*

>SPBDM4\_v1\_70214|ID:27159672| putative Adenylyl cyclase CyaB [Uncultured spirochete bdmA 4]  
VAVQDSAHNVEIELKARIQNKEEIESRLAKFMRLTGNIDKRDEYWEVSGK DPLSSGTFRF  
RVRREAGHTTITFKDKTFDGNLEINREFEFGIDNEAAFRAFVERLQGRFVYRKRKTGTRW  
ESETGVVAEVVEVASLGLFLEVECVCHTQDAMAQEEAKCQLYDVIDWCDIPRRALEPRPY  
SLLGY\*

>SPBDM4\_v1\_70215|ID:27159673|gpmI| putative 2,3-bisphosphoglycerate-independent phosphoglycerate mutase [Uncultured spirochete bdmA 4]

MVGSLEKNPKWMGREGPVVLVIMDGVGYGTYKEGDAVLAADMRHFRAL EATCPATK LKAH  
GTAVGLPSDEDMGNSEVGHNAIGCGRVFAQ GARLVNLSIESGAMFQGGIWKELVGNVRSN  
TSTLHFIFLFS DGNVHSHIEHLKAMLAQA WKDGVSRARIHILLDGRDVG SQALEYVIPF  
EDFLAQLRMQ GADYRIASGGGRQYITMDRYGADWQMVKRGW DCHVRGVGRQFAGAE EAIL  
AYRKENPSIIDQDIPEFVIVDKGKPIGTIEDGDSVVFY NFRGDRAIEITAAFEQDDDFDKF  
DRVRRPNVYYAGMMQYDGD LHVPRNFLVSPPAIDRTLGGYLASTGLNSLA ISETQKYGHV  
TYFFNGNRSGKFSETLEEYVEIPSDRVPFEQRPWMKCAEIADYVIGAIESGKYQFIRLNF  
PNGDMVGHTGVFQAVVCGLEGMDIQLGRIKGA VEKAGGV LILTADHGNSDDMYEHDKKTG  
NVQHDADGQPKAKTSHSLNPIPCIIYDPKYKGEYKKVLRQGLGISSLAATCIDLLGYVPP  
GDYDPSVLEMA YE\*

>SPBDM4\_v1\_70216|ID:27159674|apt| Adenine phosphoribosyltransferase [Uncultured spirochete bdmA 4]  
MVNSDAVRSEANGYNLDDAIRKVPDFPKPGILFYDITSILANSDAFQYCIDSMLTYQET  
EFDVA AAIERSGFVFAAPFCYKRDLPLLLVRKKGKLPKGTISCSYDLEYGSAVLEMHVED

IKPGARFLIIDDLIATGGTINATCDMIKRCGAVPVRAFSVIGLPFLNYEEKVKDVGIDTL  
IEYFGE\*

>SPBDM4\_v1\_70217|ID:27159675| exported protein of unknown function [Uncultured spirochete bdmA 4]  
MLRRGCMMLVALLLAGACFPLHLANAQETGGTTSSSGQTAEGTLQNSESAQTTDIDEENT  
TETSENPVSSSTNQAALPSFSYKDTKESTVGRALILSIGLFPFTYFYSGIVVDVTRYVSHG  
FDSAYAPWSSSVSLTDESEMWTKIAVSSAASVVFGLLGAILK\*

>SPBDM4\_v1\_70218|ID:27159676| Pyridoxal phosphate enzyme, YggS family [Uncultured spirochete bdmA 4]  
VDDVSLMAVTKFHPAEAVRSAYLSGIRFFGENRVQEAQAKYPPIRASIKDASLHMIGTLQ  
KNKINKALSIFDAIEGIESVETLKAILARTDERQEPVRLYLELHTGEASKAGFPSLDEL  
RGCETYAEFLESDVRGAGEATLCLGLMTMAPFIEDSATIRKSFRMLAAAKKEIENRFHFSD  
FGELSMGMSNDFEIAIEEGSTLVRIGTAIFGERDAHNA\*

>SPBDM4\_v1\_70219|ID:27159677| exported protein of unknown function [Uncultured spirochete bdmA 4]  
MKRIKYLALSFLCLAAPMLGALDFQIPEVLGISGFGTTLTEQITAEPLGKSHETSPFYGQ  
TPRSDIMVESASNNIKAPSNGTIIYVQTEAPVKTIFSFPLGGALAVRHPESYLSLLSGLD  
ADQALKFSKQDQTTTQDVPVAVKKGETLSGGSGSGVYPPNCFGLRFLFDAQSALWVNPVFLA  
SWIQDRTSPVIRGAKLTKFDDSGTSPFDLSGAAVKEKRIMCVQGSYRIWVDAFDTIIPGS  
SLHSAPYRILVVLGDGKSIIDTSFIAANCSEGLSFLGNPAPSRETLAADGSYNIGQIMLA  
RGEHDLQLQVSDYAGNQSSLKTLIIAY\*

>SPBDM4\_v1\_70220|ID:27159678| protein of unknown function [Uncultured spirochete bdmA 4]  
MHHQYAMKKRSYSVVLFIAAIFFSLFSVRITRQEDAVEESIFLPFSQAQDVASVPSSRNA  
FLSFVGDALGYVDTAADRLYAQPYQGKAAIDNQGWIYDRLATDVQLHGTDGQHRVLM  
YAYPWFKASWRILVRSDQMGIARFNNQGSILWVKEFSMPITALDASSQVIAVGLLDGSLH  
IFDAEGALVFAAQAGFQDIQTIYGIASVSGDSKYIVVLKGFSPQKIETYKQSESSYTRISE  
SPLKQQAVALQATMAFAEDDSHVIIARENQLIYYNIKDNYNKQIELQAEHNESLDKDEDVQ  
FFALGPIGRATIAVLRKVPDPLDSEVLILKHGLLRRVAPDAISVSEGQGTLAIVYRDGI  
ELLKGWQP\*

>SPBDM4\_v1\_70221|ID:27159679|cdd| Cytidine deaminase [Uncultured spirochete bdmA 4]  
MRPEYTSLFKRAYKACEQSYAPYSHFRVGAALLCEDGSVITGVNVENRSFGLTICAERNA  
IAAAITAGKTKFKALVIATPDAAYPVSPCGACRQVISEFMPASATVIFGNAEDSYMSTV  
GELLPHDALHDLSDSIHDHPAHA\*

>SPBDM4\_v1\_70222|ID:27159680|recN| DNA repair protein RecN [Uncultured spirochete bdmA 4]  
MLEQLSVRNFAIIEQIDFELSQGMTVFSGETGAGKSLIVDALGFLGARADSSIIREGAP  
ECSVSGLFAENTQEIELWLKEKDIEWVPEDAILLRILKQNGRSLAWIQNRQVSRALV  
EFTQFLVDIHGQHEHQRLIDPATHIHMLDAFAGLEQELRSYESVYAEWKEALHEYHEL  
QKAKRSQETDYLEFLKDIISVKPKPDEDEQLAAEEKILSQHEKLFVAVSEAAGLLGAGE  
STDVLHALKRVRADIESAGTIDSHLGLSERLSAAYYELEDISESINEYQASLRFDPARL  
ENIEHRLSELQRLKRKYGPLSDVLNKYERARVTLDTLSHADEDAKLEKKVKSLKERTL  
GAALQLSEKRMAAATSMSSSIKEIIRDLGMPDVQVNLRVARAMDEHGAYRATAQGIDEVE  
FYIAPNPGEPPERPLSRIASGGELSRFALALKAVLAAHDVVGTLVFDEIDTGIGGQVGVAV  
GKYLKQLSQYRQVLCVTHLATIAAQADQCKVDKYISSGRTSTSLRFLSRQEREVEIARM  
LSGSSESEVSRTHAAELLKQSQSDE\*

>SPBDM4\_v1\_70223|ID:27159681|ppnK| putative inorganic polyphosphate/ATP-NAD kinase [Uncultured spirochete bdmA 4]

MSEKSAIFANLNKDNAGLSAQIVQAQLGERGWHADILAFRGPSEHPDFSSYGLLVSL  
GGDGTLLEYAASFAGPLGIPILPINLGTGFIANKMDTWAVTFDQWQRRRAIEVSKRLMLK  
VQASRGKQILYSGIALNDIVSSEGNARMIRMCLYVNKECFGHYRADGLIVSTPTGSTAY  
NLAAGGPAVHPEISALIINPICPFTLASRPLVIPGTLAVEIAIDETKKTGALLTMDGHEM  
ISLKKADMVIEKYKKYALLIVPPGNAFFSALRTKLGWSGSDSA\*

>SPBDM4\_v1\_70224|ID:27159682| conserved protein of unknown function [Uncultured spirochete bdmA 4]  
MISVFSSYITRKDMDLVLSRMVEDAVVDDVFSDRFEKAIKEQFQFEYAIALRSPYALLK  
ALKVCELGAGARIAISALAPSWHRVAVEDIGLTPILDIEEETLHPSSESIQRADPSAII  
LFDALGKLPSSALLDTLSVPVIEDISQTLGNSGQSRVNMPFAYFSVWGLEADSPIATGGG  
ALLCARGKRDAQILRALDEALPELKMMDYNAALGLSQLKSYSQMIGRRKTIREILQAQL  
ARTRHSGLRIEDTELWPGYAFPVFAEASAKEIIDYAKKHGVQAELAFASSAMLEENAEA



ISPSARSIALRCVLFPMHHKLSNQQVDQIGKIIATLP\*

>SPBDM4\_v1\_70227|ID:27159685| protein of unknown function [Uncultured spirochete bdmA 4]  
MLESSKCLGYTEGIVSIIVNTLLFGIKIWWGLAASSVAMTADAWHTLSDTLTSIADGWH  
HRSDALASLMIVVGAIAAGKYVWWIDGALGIGVSALIVYAAAYDIAKTA FNALMGENASPDF  
SERIKKIAGEASPELKDIIHHMHRYGDHLEITLHARLNENTKILDAHNFSTKLEQELRK  
ELNADTTVHIEPEK\*

>SPBDM4\_v1\_70228|ID:27159686| Binding-protein-dependent transport systems inner membrane component  
[Uncultured spirochete bdmA 4]

MRISWIKKGLFFVLVLAIVIPVLFPLLWMLASSFKTQVDIVAWPPRLVFTPTLQNYERVF  
REQNFLKYFINSSIVGISAVAFSLIMGLPAAYSIARFKQKRLSIFILVARLMPGISFLMP  
WYIIFSRLKLMDSYVALILSHMLITLPIVWIMSSYFETIPIEMEESAMVDGATRQRAFL  
SVVLPPIAGPGIVTSVTLSFIFSWNNFMFSQVLSMERTKTLPIAIYNFVSYAEVDWGAVMA  
AAVAIMAPAIILTMIFQKYVVKGLTMGAVKG\*

>SPBDM4\_v1\_70229|ID:27159687| Permease component of ABC-type sugar transporter [Uncultured spirochete bdmA  
4]

MEPKKIRGSFLERNLHIIFMPAVIFVVMMFFPVLYTFFLSFTNWNLTSGMPLSIVMLR  
SYQRILREPRFLAALGRTFSFTALAVSVETILGMIILNREFKGGKGLTKLIMLLPLVS  
TPVAIGIAWNLFYDPTIGLANFVLRGLPKQAWTGSSTVIPSALVDIWDQWTPMIALI  
LLSGLASLSNEPYESARVDGATEWQIFWRITLPMVPTLLTALILRTIDALKTFDIIYAM  
TGGGPGYSSETLNIMAFKYSFEYFRMGQASVILVFLFLLVLIMSLIVRMRKSLEL\*

>SPBDM4\_v1\_70230|ID:27159688| Extracellular solute-binding protein family 1 [Uncultured spirochete bdmA 4]

MKSKFMLVILVVLALFSVSAQQKEIRVLLANHPYGDLLKAAIPEYEKATGVKVNVESLQE  
SQLTTKLTTEFATRSSTVDVFMTRPLQEGKMFYKNGWYEPLTGYDFSDYPKNALDVATFG  
NKAYIVPLVTEWEVLYYRIDLFKKAGLSVPTNFTLEMAAKRLNSSDMAGFASRGKGAAA  
VTQLSSYVYNYGGTYLDKKGKAAFDSKEAIDAIRFYGKMLANYGPSGVTNMSWENIMPLFQ  
AGKVAMWTDASVFGQIVDPTKSQVPAENVGIANFPAGPKGNTPFIVVSWGMAIAKQSKN  
KALAMDFIKWATSQGLAKRGMLANITMARNSAWKDAEVRSKINTGLIATQEYAAKYGIPY  
DRPYMSAVGEARDLIGEVIIESINTAGTSTKLEALAKDKVDAVNGLLEDTGEYGVY\*

>SPBDM4\_v1\_70231|ID:27159689| Transcriptional regulator, RpiR family [Uncultured spirochete bdmA 4]

MKISTRCTNSAIYYKMADIIGTGMEKPSSSSCLYLIHSLMDTLSEREKRVAEHILEDPA  
SAVHPSIEELSESAGVSVSTLVRVFKKLGFKGYQQFRIALASEALAPEAKIYETFDVDPGE  
DPVGI AFNSARKALEITASMIDRSALTELAARIIRSNCIYLFVGGSAIVAQDAMHKLIR  
TGIRCIGTEDCHMQLMIASQMSEGSTAIVISHTGVNKDTRLRIAETAKNAGAFLCVITTY  
RSALARMANMRFISASSGSPSVSEAFSARIAQLALIDSLYIAIMEQLGEQGIDNVEKMRA  
AIAKRRM\*

>SPBDM4\_v1\_70232|ID:27159690|gnd| gluconate-6-phosphate dehydrogenase, decarboxylating [Uncultured  
spirochete bdmA 4]

MRADIGLIGLAVMGENLVLNMENHGFTVAVYNRTIEKVDAFVTGRGYGKHILGAHSPKEF  
VAMLKKPRIVMLMVRAGSAVDDTIAQLEPLLEPGDIIIDGGNSNYLDTMRRLSELETKGF  
LYVGTGVSGGEEGALNGPSIMPGGSEAAWQHIRPIFQAIAAKVDDGSPCCDWVGPGGAGH  
FVKMVHNGIEYGDMQLISEVYHLMRNQLNMTPEMAEVFDTWNGGELDSYLISITSDILR  
YKDEDGSPLIDKILDAAGQKGTGKWTGITALDFSVPVTLIVEAVFARCLSAMKDERVGA  
KLLGKPSGASFDGERAAFIDDLGRALYAAKIISYAQGFMLLREAASEYGWKLSYGSIAMM  
WRGGCIIRSRLGRIKEAFDADSSLSNLVFAPFFAKQVLENEKALRNVVGEAVAAGIPV  
ALSSALEWLDGLRTENLPANLLQAQRDYFGAHTYERVDRPRGQFFHTNWTGHGGSTSASA  
YVV\*

>SPBDM4\_v1\_70233|ID:27159691| PfkB domain protein [Uncultured spirochete bdmA 4]

MGALDIIPAEKANLDFLSLGLVMRMDPGIVPFAFADHYDVHVSNGEYNVAANLARCFCGK  
RTAIASAMVDYPLGERVEAAAREMKVQGFYKHFYDGVGRPNIALVWSDRGQGVPPVVF  
YNRANEAALLKQGDFFETIFGRGVRWFHSGGIFSALSDTTPKLIIEAMKTAHAHGAIV  
SFDLNYRAKLWAAANTGKKPSEVLGEIARHVDVLLGNEEDLQMGLGLPGPDIHSASKLDP  
ASFLKTIEQVHAQWPNIIEVVATTLREVKSTNHHLWSAVLWIKGQHWLAPTMELDVYDRVG  
GGDGFAAGLIYGLLEGFSPEEALRMGWAHGALLTTPYGDTTMASLEQVKTLAQQGSARIQ  
R\*

>SPBDM4\_v1\_70234|ID:27159692| Alcohol dehydrogenase GroES domain protein [Uncultured spirochete bdmA 4]  
LKALILKEYMHLEIADVAPQISAPDDVLIRIKATAICGSDVHGIDGSTGRRQPPLTMGH  
EAAGLVAAVGPGVKNVATGDRVTFDSTIWCGECHFRRGEVNLCNRRVLGVSCDEYRRE  
GTFAEYVVPERIYRLPESVAFEEAALTEPVSVAMHAFRITNMQPGESA AVVGSGLIGL  
LLIQIIRSYSPHLIFAFDTSQRRAAALRAGADFALDPADPASQKKVLDMTEGRGVDRVF  
EAVGASAPIATAVAARKGGT VTLIGNISPKAEIPLQSVVTREISLIGSCAISGEYPVSL  
DLMASHKIDAKSVISAIAPLEEGPLWFERLYRREPGLLKVVLP\*

>SPBDM4\_v1\_70235|ID:27159693| Oxidoreductase domain protein [Uncultured spirochete bdmA 4]  
MNDKIRFGLIGYGKVAALHARALRTAPHCELVS VSGHHQEKRDFAVQWGLASRNSVEEM  
VKEDGIEAVVITTPHPRHYHDAMEAFGAGCHALVEKPLALSVKETEAMIGESLARGRLS  
VISQRRWYPSCQRIRKAIDDGFLGTPALGQLTILGWRDEPYRSDPWRGSKHEGGGVIV  
NQAPHQFDLLCWYMGEVAEVYGGWANINHPYIEVDDSAVA AVHFRSGGLASIFISNSQRP  
GLYAKVHIHGTS GASAGVQTDGGAMFIAGRSVLEPPYNDIWTIPGQESMRERWQKEDAT  
FFSGIDATWYFFAQQEEDFASAILNNGKPAVTGYDGLQVARIIEGIYRANEDKAPVRY\*

>SPBDM4\_v1\_70236|ID:27159694| conserved protein of unknown function [Uncultured spirochete bdmA 4]  
MDIYAHEPLGFDGILVHVEADIRTGIPAVEIVGLASTSVREARERARIAMRNAGFEFPQD  
RILVNLSPADLPKEGSAYDLPIALKILAKSGQVEDVPARILAMGELTLEGDIRPARGVLP  
AVRAAADHGIRSCILPYENAGEAHIVSSVQVWPVRHLSEARQVLIALGKGEAPQRSGRRT  
TDRVPDQIQDFDDFRGDERLMRALMVA AAGGHNMFLAGPPGAGKTMAAQRFPSILPELDE  
KEAFDTASLYSLWGKTQVQLMRRPPFRAPHHSASLEGMLGGSKPLRPGEVSLAHHGVFL  
DECPEFRRDVLQALREPVEQGYVDIVRAGRVLRFPSDFQLIMAANPCPCGNLGM PGKTC  
CSPEEIRRYWKKLGGPLMDRIDMRIA VTPPEPSRLISASVTPTGLFREK VLSARLHQRSR  
LKRACATYGNPRTNARIPPALISDICSIGSAEKLFLSGMTSYGLSARAGHSILKVARTI  
ADLDARTDIGESAIEEAMEYRQFGDGDVWPI\*

>SPBDM4\_v1\_70237|ID:27159695|pheT| Phenylalanine--tRNA ligase beta subunit [Uncultured spirochete bdmA 4]  
MPKIEVNEELFFGLAGKTWSDKEEFEDLTVAKAELDEWDTSLSADRERTIKIELNDTNR  
PDLWSTAGLARQLRMYRTRSIPSYFFASRKKALKAPYRVVVEKSVKGVRPWLAGLVAKG  
KPIDALLRDMIQTQEKLAWNFRKRKGVSIGIYRIALIEWPVHYRGVDPDKVSFVPLQE  
TRTMTLNQILEQHPKIEYASILKGRPVHPLLTD AKGRVLSYPPINSADLGAVQVGD AE  
IFIEVTGSDYPSVALSSAIMACDLADMGEIDNVQVDYEYDTPFGSSVFPYFQEEVSV  
PLDDANRLLGSSLEMADALEALTRMGLCA YSTDGAVIHVAPPEYRNDFLHPFDIVEDI MI  
GVGMEKFVPQRPTDFTIGRLTPIERFSRKA KSIMVGLGYQEMIYNYLGSGKDYAEKMQVS  
A EGLVKIANPMTENYEYVRNSPLPGLLQTESVSAKASYPHRTFEVGKVVLKAPEVNYGVV  
TRQYIGFLTSHAQADYNEIASHVA AFMYLLGKEYTVRESSDSRFVPRQVDVLVDGARVG  
IFGELHPLVLEAFGVMMPCAAGELDLEMLLED\*

>SPBDM4\_v1\_70238|ID:27159696|pheS| Phenylalanine--tRNA ligase alpha subunit [Uncultured spirochete bdmA 4]  
MIDQSAARALHPLEVKIILAFSSGDMIDSARVREKLGFKEGQDQQA FSWLVAKGVLEEAD  
RQTEVFYELTPFGQEWHDGTPVRRIFSLRESGPLSLPDIAQKLGFDQKT VGS AFGALS  
KEGVCAMDESRRAVLARPELPQSLLDTEALLDAAA AHNGSLPETS LTPQKALVAQYAKK  
RGAQDAPFRIAERAKVLFRLTPLASEYREAVTALGMTGEELGAITPEMLEKGTWKQGSFR  
PYNLQIPPARVIPGRRNPYVEFLDSVKDKLVSLGFEEFDGNMVETEFWNSDALFMPQFHS  
ARDIHDVYYIEPTHAKFIEEPYLSLVAAAHEHGGNTGSRGWQYQFDRDFTRRLILRSQG  
TVLSARQLPKAKVPGKYFGIVRCFRYDRVDATHLSDFYQTEGIVLGEDVNLRTLLGFLEM  
FAVEVAGAKEVKYVPGYFPFTEPSIEVHIKHPVLGW FELGGSGIFRPEVTRSLGIDVPVL  
AWGIGIDRMALMALGLNDLRELF SADLESVRMRRSQYKIQ\*

>SPBDM4\_v1\_70239|ID:27159697| conserved protein of unknown function [Uncultured spirochete bdmA 4]  
MYFNELVSSYDRQRRENIYHDLMRDRVREVLVGS LYDSFVVESDGVLTEQIYGEYFKL  
NLNTIPRVTCAYTEESALDLFREGRFDLIIIMASLDFDMPLRLAASMRRIWPDIPILLMV  
TNNSSLAMLDMSRPELA AFNRVFWNGYSKLFVGMIKYIEDWRNVEIDTRTGEVRVILLI  
EDSVRYYSRYLPVLYKVVLRQTQALIEEEHITESYKLMSIRARPKILLASTYEEAHEIFE  
TYKPYLLTVITDIRFN RNVCDENAGYDFLQFAKREL PDL SMLVQSSEPNVKEKAF AIGA  
SFIDKNSESLEMELAAFLQANLGFSGSFVFRTPDGNEIDHAHNMGEFVQKLNKIPIESLLY  
HAEHNHFSAWLMARGEIHLAKILRPYRITDFSTPAELRQFIVRMIDQIRSTRSRGMMSYF  
DPEMVKYPRYLCKIADGSVGGKGRGLIFIHSLLENIDFSQYIQGMRISMPNTV FVGIDEF

EHFLESNGLWSWAYYGDNAQDVPPAFVQKSLSPQLLERLRQFLSVSKKPLAVRSSGLFED  
MLMVPFSGVYDITYILPNNHPDIDVRLQTLCDIAKLIYASLFSKESRAYFEAANYNLEER  
MAVVIQELVGSPHGAYFYFNAAGVAQSYNYYPVSYVKPDDGLCVTALGLGTYYVGGGAFF  
RFCPKYPKLDVLSPEHALESTQRYFHALSLENQAPDLLQGEMASLTELPGAAEKDRYFP  
MLASTWDAADQRFVPGIMIKGHRVIDFANMLKYDAYPFAKAVDMVLDIATRSMGTPVEIE  
YALNFDADREEPTLYLLQLKPLIHIDDRVEIDPGSIRKEQCFMLSRGCMMGNRDYDIRAI  
VWVDPRKFERSATLEIAAEIEELDSIAREENFNYYLLIGPGRWGTRDRWLGVVPSFSQISR  
AKAIAEVDLPDFVVESSQGSFFFHNLTTMHIKYMKVSHDSAEDFIDWDWLYAIPPRVRTK  
HCALTVLESPMDLRFDGRSGVGAILKPLAAPSGEPSGEPSGEPSGDVSEFEFKAV\*

>SPBDM4\_v1\_70240|ID:27159698|aroF| 3-deoxy-7-phosphoheptulonate synthase [Uncultured spirochete bdmA 4]  
VIKNIKLAARTPGQKTTIIDVNGVKVGGQLVIIAGPCS VETERQTIETAIAVKKAGAHML  
RGGAFKPRTPSYAFQGLGLKGLKILDKARKETGLPVVTEVVDTDRDVSWSVGEYADVLQIGA  
RNMQNFSLLREAGKSGKPILLKRGMYSTLEEWLNCAEYILAEGNPNVILCERGIRTFETY  
TRNTLDLSMIPAVRRESHLPIIDPSHGTGLLPFIEPMSLAAVAAGTDGLEIEVHIDPAS  
ALSDKDQQLTIPMFESLMEKLRKKAFFEESKMYVPGESPDNSTPETKFTLPSAFSEAVD

\*

>SPBDM4\_v1\_70241|ID:27159699| putative 3-dehydroquininate synthase [Uncultured spirochete bdmA 4]  
MQTTHSIIRFGPLSEFRELLSPERVVFFITSSALREKASEKLPMERESGRWIEVPDGESCK  
TFLVLESVYHALLNFDAGPDTVLVAIGGGSVSDLAGFAAHTWKRIGLILVPTLLAMID  
ASIGGKNAIDIGYAKNAVGSFHLPTSIIICDVGWLPSPLEKDLASGMAEAIKHAVLDSEEH  
VQFFEQLAETRIPLAELGGKTFEDLIRRSQAVKLRVYNADLYDSHERHALNYGHTFGHAI  
ELLTGLPHGFVAAGMGAANTLAVSRGTLDPVTQGRIGSLLRHFGPLPAGIQEAFGMAGRT  
MDRRALLELIRADKKRRGNMDFVLPHGIGDVRIEAIIPVDELAEVLQT\*

>SPBDM4\_v1\_70242|ID:27159700|aroC| Chorismate synthase [Uncultured spirochete bdmA 4]  
MNTGGRIFRISLYGESHGPAVGVVIDGCPAGIPLSEEDFAVDLARRKSGAEGTTPRIESD  
RPAILSGVFRDHTSGAPIHIEFRNENTKSADYADFTRIPRPGHADFSAMTKFAGWQDPRG  
SGHFSGRITIGLVAAGVVAKKILNHFAPIVFETKLEAGGSKNVPEAIRAAKKAGDSIGA  
LVEIRVNGVLPGWGEPFFDAAESVIGHYLFVPAVRGVVEFGDGFAAAAAMRGSANNDPFVS  
QDGR TARNGAGGINGGITNGNEIVLHVAVKPTSSISVAQHTLDFSRDEMTDLEIQGRHDA  
CIALRSVVLEAATACALADLALTARAESPWESNIPWRKS\*

>SPBDM4\_v1\_70243|ID:27159701| Prephenate dehydratase [Uncultured spirochete bdmA 4]  
MNLEDIRTDIDRIDAKILLSNERMEKALLTRRFKSGTFDPTREQVVLVDKVRHSSQCLLD  
PQFSVKIYEQMMAESRRIQEASPQTVAFQGEHGAYSEVALRILIPHAATIPCREFSDFVD  
GVEKGIYDYGIVPVENTLGGIVGPVNSILYITTLKIVAAIDMPVRHCLLTVPGADHREL  
TAWSHQALAQCRNFLQRNHLDSEPYDTAGAAKALSENRPKGIAAVASKFAGELYGLET  
IKEDIQDSPHNRTRFFLISARGNGDEGDKCSAVFTAGNKAGSLFVAVLKVFVFAEEKINLTRI  
ESVPDTPGKYAIFIDFEGALASDAVQRAVGKVKMAEDFKILGCYREMRVEE\*

>SPBDM4\_v1\_70244|ID:27159702| conserved protein of unknown function [Uncultured spirochete bdmA 4]  
MKIAILGAGHMGAWLTEELCWHHEVMVHSDLLKMKYFIK VHRALSIDEFAKFEPELFIN  
CVPLGYTLEAFDAVPLLPKTCIISDIASVKTGFKEYEYEQAGRPFVSSHMPMFGPTLANIR  
DLQEESAIISSESNREGASFFRDFYSSLKIRIFEYSFEEHDKTVAYS LATPFAS TMVFAA  
CMKKQDAPGTNFKRHLTIAKGLLSEDDRLLTEIMFNPR TIRQLELINSKLTYLTHIIRQR  
DYEEMKKFLDSL RANIGE\*

>SPBDM4\_v1\_70245|ID:27159703| Transporter [Uncultured spirochete bdmA 4]  
MSTGNRPSNPPQQSAIKIGKKAFLLSAGIILFLMLISGILTIVLPPGEYQRIVQDGKTLV  
VNGTYHSVPRPDYPAWRWLTAPIEVLFSQDNLTITIIIFIFCVGGISIAILEGAGVMEEL  
IHKL VRRFSRRKYFLIALVILFFMAISSFIGVYEGMVPMIIFIVPLAISLGWDSL TGLGM  
SLLPLAFGFASA VTNPF TIAVAQRIADLPLFSGAWFRIIFVIVYIIVTMFVILHAKRVE  
RDPSSSPTFKEDEAIRASLGEKQSATAQAAAEGEAGSLASPEDSLSKAKTKGLIWFVAVCI  
GIAMIIVLVTARMPGLSDLAFFPIMALLFLIGGIGGGLLAQMKGMSIVKTFLQGAANLAPG  
IVLILMAYSVKHIIISGKIMDTILHGAATLIAQAPPLSAAFLVYATTLVMNFFIGSASAK  
AFLMMPLLTPLADLVGITRQTA VLA FDFGDGFSNMIFPTNALLLIALSFTVVSYPQWMRW  
TWKLQAIMLLVTSIFLGIAVAIHFGPF\*

>SPBDM4\_v1\_70246|ID:27159704|aroA| 3-phosphoshikimate 1-carboxyvinyltransferase [Uncultured spirochete bdmA

4]

METRTMHPAAVGGSSIRAPASKSAMQRAIACAILGRGTSRIEGAPVCADSRAALRIAQKLG  
AEVREGGGIIEIDGSPFFQKESPRGRGGHRSRPERPLEISCGESGLCMRMFSPVVALLEDE  
VRLTGEGLMRRPMHMEVSSLNIFGARCASNGGRPPLTIRGPLRSKRATIDAKGSSQLIT  
GLLIALPLLPDSEIEVENLVSAGYLDLTLEMCAHFGVHVEKEEDGATFFIKGGQSYRAS  
DIHVEGDWSSGAFLAVAAAIAGREEGLRIRGLSWGSKQPDRAIAEVLSVAGADLRFEGSD  
LIVKPGKLVPPSFDATDCPDIFPPLVALACAIRGISRIRGVHRLASKESDRASALRTTFG  
TLGVEVSIEGDEMQVSGGHLRGGTVSSWKDHRIAMAAVAALAAEGEVHIEDTECVSKSW  
PGFFEDLASILLH\*

>SPBDM4\_v1\_70247|ID:27159705|gdhA| glutamate dehydrogenase, NADP-specific [Uncultured spirochete bdmA 4]

MNSYIKEVLDGLRARYPWESEFLQASEEVLESITPLIEAEPKYRQQKILERIIEPERVVM  
FRVPWVDDKGEYHINRGYRVQFNSAIGPYKGGIRFHPKVTLSTLKFALFEQIFKNSLTGL  
PMGGGKGGSDFDPNGKSDNEIMRFCQSFVTELYRHIGPDTDVPAGDIGVGGREVGVMFGQ  
YKRLANEFTGVFTGKGLSFGGSLIRPEATGFGAVYFAEEMLKLKNDSLKKGKTVSVSGFGN  
VAWGACIKASQLGAKVVTISGPDGYVYDPDGVGTQEKWEYLEEMLIIDRNKVETYVKKFP  
KAVFYKGGKPWEQKVDIAMPCAIQNELNGEDAKALIENGVKIVVEVSNMGCTPEAWKLF  
EKKIPFAPGKAANAGGVATSGLEMSQNSMRLAWRAEEVDHRLHEIMMNIHKACMETAVKY  
GFEGNYVVGANIAGFKKVADAMIAQGLV\*

>SPBDM4\_v1\_70248|ID:27159706| conserved protein of unknown function [Uncultured spirochete bdmA 4]

MSLFTQFFGARTKTDLPQDESVEEQREMIEGVEHLPEKIVRDVMVPRTDTVCVEDTTTID  
EILATLVESGHSRIPVYSGTIDNIVGILYAKDVLAAVKKEPELEKSLMRPPYFVPETKR  
IDTLLKEFRRRHVHIAIAVDEYGGTAGIISLEDIIEEIVGEIQDEFDEEAEQIVKIGENA  
WRCDARIRLEDINETIGSQLPSGEYDSLAGEYVFDLFRIPSAGEQVTAGDLQFSVEAMEG  
HRLITIRIDRIDISENDEHGEHVSIS\*

>SPBDM4\_v1\_70249|ID:27159707|ybeY| Endoribonuclease YbeY [Uncultured spirochete bdmA 4]

MNGNEVFYSIIGIEEPIWAQRAADFALSVLDLLEKRDWQVSLTLCDDATIQUALNRDYRHI  
DSPTDVLSFSLGEFEPVEQGENIYIAGDVVISIPALRRNAAEFEVTEDEELRRLIIHGIL  
HLSGMDHEDSSADQSMLELQERLLCQLGGNAIL\*

>SPBDM4\_v1\_70250|ID:27159708| putative 7TM receptor with intracellular metal dependent phosphohydrolase  
[Uncultured spirochete bdmA 4]

MKKNSEETFLRKVIRWLGSIKPSMWWFFVGTIVIAAVGLFLLGPSSIGRSNSLKSVEAGKI  
AETDIYAGKDTVYTDKEATQRKILAEERLVLAVFVLDLKITSSIREKTEAFTSYLQLVN  
GESGGADALGLLLSSRFPDFLQPEQYATIVRAKLNSQTFVYVSDIVESLLDKGIVSVPDG  
VDFRFPNYYELVRTLNGREESEQLAVNGMVTLANLGNRLEDEM DARRIPESLKQYVRL  
AKALLKENTFFDQSLSEKRIASARANVEPVTRFVSRNEILVRKGELITPEVYQQIKTIRS  
AILVSDVGVLLTDLGLLLIASLLGFLARIKDLSDFPNDRPSLIFLLSLLILFYWILAV  
QNVLDTKDLSRGALFVPASLFAGLVSLLYGPRTGIFFSLSFFLTGAATNLNAQFMIGIL  
LAGVSATLTMRTARTRIMLARA AVLQALVQALLAVVLLFNQKPTAAEVFQAMGLGALNGF  
AGGSFILLPLFERILDKATQFRLMELADINAPVLKEMLSNAPGTYAHSMNV AHLAETA  
AKDVGANPLLARIGAYYHDIGKIDHPEYFTENQKGINRHDEINPTLSASIIRRHVKDGV  
RAREIGLPKEVIDIIGQHGHNSVMEAIINKAKDSPNEADVQSYSYQGERPRSKEAAVVML  
ADTVEAASRSLKNPNAKLEQLVHQLVLHKITNGQLEESELTHDIDVAEKAFRLILQSQ  
MHTRIEYPEQEKQ\*

>SPBDM4\_v1\_70251|ID:27159709|ybeZ| putative enzyme with nucleoside triphosphate hydrolase domain [Uncultured  
spirochete bdmA 4]

LSPSHIVLEDTQLLAELCGANDYNLSVISSLLGARVLTRGNELFIESEDKKALDLFRLV  
SAIGTSIEEGVPATPELIIALHAELTPEGGQNHSGPDNAPEEGQSEVSKFLDTCIQIPN  
GFGKVFPRSGGQSLYLQGIASHDLVFAIGPAGTGKTYLAMAYALRELMTRSRRKLVLRTRP  
VVEAGESLGYLPDLEQKINPYLRPLYDAMEALVPYETIHRLEESRAIEVAPLAYMRGRS  
LTNCIVILDEGQNTTKEQMKMFLTRLGERTKAIVTGDITQIDLPKKTESGLVHAAALLEH  
IDEVFSRLDARDVVRSPVLRKIIIEA YEKE\*

>SPBDM4\_v1\_70252|ID:27159710| exported protein of unknown function [Uncultured spirochete bdmA 4]

MRRILGILILLHVLLVPMASQESAVGPASVSAVELASKTLRFRIASATFYELRDMAVEYG  
LSAEGSADELRLRYGHFGFDPVPKTKGDVSMSEQAANA EYFTLENGTKEIRLQGLEI

RFVDSQGTVHRIKAQYVVYNRDTRVQATGDVEYTRESKTRTDTYKQSIQAVNLDDYSGV  
FVDGSFNMEPTTRESRTLIVHFGSLISSEDILALADGSLTACDAIDPHYILRAKKVWLF  
GSGDWA VVNATLYVGKIPVLWLPFFY YPSKASAFHPVVGFRSRPGGFVQTTTTYLSGKQGT  
EAQKSSALSITQGALGSFGTYISKTEPSQENTDQPSIAVLADAYSSLGVFAGIRGKTADS  
SPINLSWLIGAGVRSRIFYESTGYSPFDAAGDYASVWNRWYLGSIDLPTRIVANFEASS  
KQNVSGLKWQVSLPFYSDPYVEQDFLDRSESYDFFSIIGGTSTSSIGERTSFSQKASLSW  
SWRPSASNGGFSFSLSNLSSTLGWKSXYASKSGMNSTQLRLYAVNPQRYFFYPYNARLLD  
SNFSLSGTIFQSKNASLVWKNNTNAAAYVEDRFYNAAWENPQDIDFQSWYWLLGARSDANLN  
SSFSVDSAGLTFQVSTGVRGQGQYRPLYDERTSPTTVHPFRIADYGYNTANWNAGTNIS  
WSPLKNSDVFSASRVQYSLSGKIARIDYTGLDGS GTDANPVYDLYWLSWDTDMITDHSVI  
ADLAAKLGSSSDHLSFKIALPPLLESYTLQASTSASIVSLGAA YVISRTSTTADLKSTSL  
TGNVALKPLKNLRFSTASWDFDTQTPLSLSTDVTAWSFYARFLAQETDGYVVFQSGSWVQ  
DGTQYFRPSSVSLSWKPVLRSSPRSSSDKVLWYFETDEAFSLTQNLIQYTNSTFGADFSF  
IVKNSAGLSLSTLSSINTSFWSYYTSLLPSTSGDLDPQVYARVFFADLLDSLWDT SRL  
QSTLFLKQLSLELSVDAHDWLLSASVDAGPTLVTPASGRPYQMDVSFSLAVTWKDISA  
IKSTVSYS DGTFSQ\*

>SPBDM4\_v1\_70253|ID:27159711|uvrA| ATPase and DNA damage recognition protein of nucleotide excision repair  
excinuclease UvrABC [Uncultured spirochete bdmA 4]

MDKLIK GAREHNLKNIDLELPRNKLIVISGLSGSGKSSLA FDTIFAEGQRRYVESLSAY  
ARQFLGRMDKPDVDYIEGLSPAISIEQKTTTRNPRSTVGTVTEIYDYLRLLFARIGVPHC  
PSCGREIREQSVDQILDVVLVSWPSGTKLQVLAPVIRAQKGEHRKVLEDALKQGFLRARVD  
GQFIELETPTLEKQKKHTIELVIDRIRLSEESRRRVAEAVEAALGIADGIVTVIRETDD  
QQKEEFFSQKGACPVCGISLPEMEPRLFSFNAPQGACPACGGLGMNMEFDPDLIIPDRSL  
SFNEGVCVPYNPQSAWNRSRFEALAHFHFSLDTPFEELPEKVMQAILYGSDDDIHRVYD  
NRDKTGHFYQSKFPGILADLRRRYMESSSDEIKDWLESFMVEKECEVCHGKRLRPEALA  
VTVGARNIYELTCMPVGESVKFFESLRLSETEAQISKLILKEIARLGFLRNVGLDYTL  
ERKASTLSGGEAQRIRLATQIGSSLVGVLYILDEPSIGLHQ RDNQRLIDTLTYLRDLGNT  
LIVVEHDEQTLRTADYLVDLPGGAGEHGGYVVAHGTVPEVTANSESLTGQYLAGTLKIEV  
PKVRRKGN GAFVALK GARQHNLKNIDVKIPLGKFCITGVSGSGKSTLLSDVLYPAISNR  
IMRSSLREGEY EKILGLEHIDKIINIDQSPIGRTPRSNPATYVGVFTPIRELFASLPESR  
ARGWKPGRFSFNVKGRCEHCQGDGTIKIEMNFLPDVYITCEVCHGKRFNADTL D VRFKG  
KNIADV LNM TVEEGSEFFAHIPSI AHKLRTMLDVGLGYIRLGQSAL T LSGGEAQRVKLSL  
ELARRATGR TLYFLDEPTTGLHFADVRQLLEVIHRLVDSGNTVVMIEHNLDIIKQADWVI  
DLGPEGGDRGGTIVAEGTPEEIAACTASYTGQYLRPMLRA\*

>SPBDM4\_v1\_70254|ID:27159712| conserved protein of unknown function [Uncultured spirochete bdmA 4]

MSRCVPHAGKSAEYVGPWPA AEEGFPPAGAVVGGPARFLVLGTFPSIRSQSRQEYYGHE  
RNHFVPLLSFAAESGLLPLPAEPGQSMWHAGASLAAVSA YEAKIGLAARLQVILWDMVK  
SCRRTTSADDALEIVALNDIAALLQAHPEIERIGLNGTRASTLFLKNVYGCDFRQAREA  
LSGVGGRVLA IAGKTRAIYRLPSTSPVPTPQYRTIEDKWALWQRFFY\*

>SPBDM4\_v1\_70255|ID:27159713|ychF| putative GTP-binding protein [Uncultured spirochete bdmA 4]

MPLNCGIVGLPNVGKSTIFSALTAAKAEANYPFCTIDPNVGIVPLPKRDLRDLCEIFKP  
KRRVPAVVEFVDIAGLVRGASKGEG LGNQFLSHIREVGMIAHVVR CFDDPDVIHVAGRVD  
PADDIEVIHTELALADLDSVDKRLDKLSRQLKVQDPNLK DSEKEMAVLQKIRPALEEGK  
PAFTVGLEPEESELARRSFLITL KRELFCNVDES GAHGNRYVDIVKSIAEKQGSEAVVI  
CGKFEAELADIEDPAERAAFLQDIGLEEPALASLAHAA YRLLGLRTFFTGGEDECRAWTI  
RAGDKAPTAAGVIHTDFEKGFIKAEVYHYDDLIQY GSEAAVRAAGKMRQEGREYVVQDGD  
IMFFKFNV\*

>SPBDM4\_v1\_70256|ID:27159714| putative enzyme [Uncultured spirochete bdmA 4]

MQDLSAYLSANAHNMKKS VIRELLKLTNQPDII SFAGGLPAPEAFPVEELREACDRVFKK  
YGDKILQYGTTEGDNDLKAQLVAYESAQGLTLGMQNLLITSASQQALDMLPKIFLDPGDY  
VIAGRPTYVGAIQAIQSYQGKVLGIPFSTANDGFD MVELERRY SRALSQKKRIKIYVIP  
DFQNPSGICWSLEKRRALIEFAYQENLFIVEDAPYREIRFLGEPISIIYKLEQQMQNRGI  
VINLKTFSKILAPGVRIGWVIARE DVIQKMVVAKQAMD LCTSVLTQKMIAEFMATGKLKN  
IVARTCGIYRDKRNFMLEKFDA YMPKRFDLTWTKPEGGLFLWLSLPHYIDTDKMFYKAIE

RKVAYVVGSAFYFDEAETNSMRINFSYSTFEQIEEGVKRLAVTIQEEIEAHEAGPRGQTV  
PEDM\*

>SPBDM4\_v1\_70257|ID:27159715| Beta-lactamase domain protein [Uncultured spirochete bdmA 4]  
MKVHPVTDRIYALHADIRSDDLFEGIWPIPYGVSLNSYLIKGEKTALIDLVRDWDVWGAPE  
IKNQLASIGVNLEDIDYLILNHLEPDHTGWLAEFLEINKKVVQLATAKIDLVKSFYFEH  
ERVHAVKNGETLDLGGAGQVLQFFETPNVHWPETMMTAAEGGVLFSCDGFAGALGDRV  
FDDEISPDEHEFFEAESLRYANIVASFGIFVKRAIEKVSGLPIKVVAPSHGIIWRAHPE  
TIERYLHYANYLEGPREKEITIVWGS MYGNTERGLKYVIEGIEEEKVPYTIHRVPNENV  
SFVLADAYKSEGVVIAMPTYEYRMFPPMAYVLDIFERKHIYQRKALRIGSYGWVGGAKKE  
YESKIAVLKWDSDSAEWAGAPSGDMAQLLRERGRELARRVKGAQ\*

>SPBDM4\_v1\_70258|ID:27159716| protein of unknown function [Uncultured spirochete bdmA 4]  
MTEFIETLRSASATVQAIAVSVGGLIGVFATLAFFFMIVVADRFGKR\*

>SPBDM4\_v1\_70259|ID:27159717|gcdB| Glutaconyl-CoA decarboxylase subunit beta [Uncultured spirochete bdmA 4]  
MQDVFIFGTSITWKMLVMYGIGGILIWLAIKKQYEPMLLLPIGFGAILVNLPLSIAWEHE  
GVPGLRILYDAGIANELFLLIFIAVGAMIDFGPLFRNPLMIFFGAAAQFGIFATMIMA  
TLLGFDLKTAA SIGIIGAADGPTAIYVANKFARDYLAPISVAAYSYMSLVPIIQPPVIRL  
LTTKEERRIHMPLHEKQSPQWLRILFPILVTMTAGIVAPISVPLVGSLMFGNLIRESGVV  
ERLSQIAQNELAYLVTLLGITIGGSMSAEKFLNWNTMLIMAMGLVAFIFDTAGGVLFK  
MVNLFPRERKINPMIGACGISAFPMSARVVQKMASEEERGNILMQAIGANVSGQLGSI  
LAGGLVLALVPLLVK\*

>SPBDM4\_v1\_70260|ID:27159718|mmmA| tRNA-specific 2-thiouridylase MnmA [Uncultured spirochete bdmA 4]  
MNENITVAVGLSGGVDSLSAARLLKEKGYKVIGLTMKIWK GAYKIQEDLKHACFGPGEEE  
DIAACERLCKNIGISYNVIDLSEYEHHVIEYFRKEYLAGRTPNPCICNRELKFGFLID  
RAKGTGLEFDL FATGHYVRTSSIDGTTYLKTARDAKDQSYFLYGLDSSRLSKIMFPLGE  
MTKEETRTAARAYGLEVADKPESQDFVGGGDYAPLFEYDRPEPGDIVDLKGNVLGQHRGL  
PFYTIGQRRGLGISIGPEPLYVIALDARQNQVIVGQKGLFSSGLLSHSFRLQNPQTYGQ  
SFACKVKIRQNHKPAAAVVLADSEG DARIDFEIPQRAVAPGQSAVLYSEDGLVLGGGIID  
AAIPDEESKSTCLADNA\*

>SPBDM4\_v1\_70261|ID:27159719| conserved protein of unknown function [Uncultured spirochete bdmA 4]  
MKTEVLWYLGERSIELREVEIPEPRAHEVLVEIEMCGMCSWDLLSFAGKFGKFHPYPFAA  
GHEGVGRVIKVGDNVSSVKVGQRVACHEVPIGTPGGALMARHAIRTEQKVTVIPENTIPL  
KYWVVEPVVCI VNGLVYAGIQPGDSIALIGAGYMGLIFVQGLAKTLAKEVVAFDIDEKRL  
ALAKEFGASRIVKIEGNAIPEEFRRYFDVIIETAGKPSSIEMALSLAKSGAVIENFAWHH  
HMHEFDLDAWHTNAWRILNIQPGVNPFGDLFPRITIDLMLNGTFSNEKLITHWAPVEEAK  
EIFTTALERKDGVMKGAVMFK\*

>SPBDM4\_v1\_70262|ID:27159720|rbsC| D-ribose transporter subunit ; membrane component of ABC superfamily  
[Uncultured spirochete bdmA 4]  
MKVKFVETLKNYGIILAFSLICVGLSILSPVFFTLNINIIN VIRQTSIYGIMAVGMTFVIL  
TGGIDLSVGSVLA VSGAICAGMLKAGNPIILVILATLGVGVGCGLVTGLFVTKARITPFV  
VTLGMMSIARGLALIYTRGYPISGFSPTFRLIGGGYILGIPIIIIFLVV VIIAYIVLMQ  
TKLGRYTYAIGGNEETVRLSGINSDFFKTLVYVISGSTAALSALILTSRLNSAEPIAGTG  
YELDVIAAVVIGGASLSGGRGSVWGTFIGALLIGVINNGMNLGISPYFQQVVKGLIIG  
AVWLDQLRAKEE\*

>SPBDM4\_v1\_70263|ID:27159721|rbsA| fused D-ribose transporter subunits of ABC superfamily: ATP-binding  
components [Uncultured spirochete bdmA 4]  
MDDRVLWMKGISKSFPGVQALKA VDFDLERGEVHALVGENGAGKSTLMKILSGLYKADEG  
EIWLRGRKLSSRGIKAMIDAGVSVIYQELNLMRQLSVAENIFIGREPMRHSGLIDWKKMY  
LDVQRILEPFNV DINPKTKIYLLSPA YQQVVEIAKALSNSDILVMDEPTASLTGNEVDK  
LFEIRNLRNSGVSIIYISHRLEEIPQIADRVTVLRDGEKILTKPLGELTTAEIIRHMVG  
RTLTEQYPKISVPLGKEILHVENLTKKGYCEDVSFSVRSGEIVGFTGLVGAGRTEIMQTI  
YGRMKKDSGR IYIDGKEVQIHNTCDAVRKGIGLIPEERKRQGLVLGLSVFDNVMTILDK  
ESVLGFLKKKLN IYHVEKLVELMEIKTPSTKQLVRYLSGGNQNIILAKWFLRHCKVYIF  
DEPTRGIDVGAKVEIYKLMQNLAKEGAGVIMVSSELPEILNMSDRIEVVFSGSIVKEFQR  
EADSEKVM EYALGLHEHESQQLRAAGAET\*

>SPBDM4\_v1\_70264|ID:27159722|rbsB| D-ribose-binding protein [Uncultured spirochete bdmA 4]  
MKKVVLVALVVIALVPAAVFAQKQIVIGMTVPGLQFPFFVTMKQEAEAAAALGLVKINFI  
DAQNASDKQMAAIETFVSQKVDGILISPLTEDSLVPAIEDAVKAGIPVATVDRKANTNAV  
LIHVGADNVEGGRAAARFIIKLGNGKGTVIELEGTPGASAAIDRKKGFDEIIKTSNVKLL  
VSQSADFTRSKAQSVMENLMQVYPKFDAVFGANDEMIIGAIEAMLAAGVNPASKVTIGFD  
ATDAFTYMKEGKLNATIDQFPGKQAAMALEALANKIRNNVNPQKVVYISPLPVTK\*

>SPBDM4\_v1\_70265|ID:27159723| putative HTH-type transcriptional repressor PurR [Uncultured spirochete bdmA 4]  
MPSLKDVARLAGVSTSTVSRAINGNIPVSEETLRRVEKAVRDINYKPNLVARGLRIKSTK  
LLGLVVPEIQHETFISFIRFTEEA AEAKGYNLIIGSTNSDPDREERFIENLIRRNIIDGII  
FSRVSDKSHVLKILDKTKIPVVIIDRTLEREDIPSVVMDNYASGKIAAEHLLSLGHEHFA  
CITGPLDIAINRDLRAGFTETVHKAGAVLEDKCIYEGNFKFESGKKGIAYFLDTGAQFTA  
LWAQNDYMAMGVLNLYLSKHSIPVPEAVSVVGLDNIQQSWMMQPALTTIAQPFRDMCSHAV  
DIIIDHATNKEDKMGRIQIMLOPELIVRETTAEPPEKCVTN\*

>SPBDM4\_v1\_70266|ID:27159724| conserved protein of unknown function [Uncultured spirochete bdmA 4]  
MAQEKQMIKALNEGKILRLEPAWVPRSFICIPGRRLKHPNDYYAYGANRGGIDERWFA  
STTKADNGPLTTAFEGLSFVWVEGKHHVLLKDAIEIAGREILGDVMMNAYGGWRAYSKFF  
DNQEPLPHHVHHTDKMAANIDQMGKPEAYYFPKQLNNHGGWFPYTFGLNPGTTKEQIKQ  
CLADWDKRDNNILALSRAYMLQPGTGWDVPPGILHAPGSLTYEPQRASDVFSMFQNIW  
NAYTPKELLQKDIPEDRKDDLDYYVDLLDWDLNTDPLFYEHRFMSPKPKPIEEMHAEGY  
EEYHIVYKTQSFSAKELTILPGRSALIRDKGPYGAIVVQGHGKMGLLDIESPAMIRFGQM  
TQDEVFVTEKAAREGVLTNTSKTDELVMLKHFGPEV\*

>SPBDM4\_v1\_70267|ID:27159725| conserved protein of unknown function [Uncultured spirochete bdmA 4]  
MITTSAEHIRYFGRNSIVLSNEKVRAVIDDLGGMVPEFSLRKGRGAINAHWIPDFRGNNG  
QPWDAATHAPYWKGKILYILAGDFPCSPSFGPDCTVDGTKLPAHGWTANERWAMSSSGIL  
ADENVAYAIQSLQSPDRSMPLSYKKYDVVQKDHVHYSVISIRNHGGSPIAINIAHHNTT  
GAPFLQAGCRIYVSAQKFLTPPLHTEFDDTGRLAVGAEFDSLVRAPSRNGKLIDLSVVP  
MIGFTDFVTGAVPKDARLGWSCVNPVLRRLAYVTFFPGPRDIPEKDIPLGFNDLWMQYGG  
RNFTPWALSEGADRTFCLGTENAVGAFANGLEYSRANPILLDSPTIVSIPAGEERNLFY  
GTALIELDDSLASEAILNIEAEDDALVLKTTKSSQRILLDGSFSSLRVLIRALS GK\*

>SPBDM4\_v1\_70268|ID:27159726|ulaE| L-ribulose-5-phosphate 3-epimerase UlaE [Uncultured spirochete bdmA 4]  
MTQASAEERYSFYIYEKAMPPGLHMREKLQAASRHGYDFMELSIDESDEKLARLNASAQW  
KRELADAIRDNTNIRIPTMCLSGHRKFPGLSSDQALRVRGMEIMKAAIRTAADLGIRIVQI  
AGYDVYYEPSTAETGSFFAENLAKSVEYAAACYGVCLAFETMETPFMNTVEKALEFVK  
SPYLQLYPDVGNVTNAFQGDTPRVVQDLRCGKGHIVAVHLKETKPGIFREVSYGRGHVDF  
DACVAETAKAGARMFTSEFWYSPDWDWEAEMEKSFAFLHSLKLERAFSGEI\*

>SPBDM4\_v1\_70269|ID:27159727| Carbohydrate kinase FGGY family protein [Uncultured spirochete bdmA 4]  
VKKYFLGIDNGGTVAKAALFDEKGMVEVGVASETIPFTSAGGGWAERDMHSMWKANCRIIK  
KVL RDSVIAPQKIAGIGCTGHGKGLYLWGKNDTPVYPGIVSTDTRAWEYPLRWQKDGTA  
RVYVKTQKILACQPVSLLAWFRDHNPDILSRVRWIFEAKDFVRYMLTGEAAAEITDYS  
SGLMNIRDGCFDIGLLKEYGIAECMGALPPLVKS AELAGRISKKAAMATGLVEGTPVAGG  
MFDIDACAVASGVIDPENICVVAGTWSINEYVSRFPVTDGSMVMNSLFLCLPEYFLIESS  
PTSAGNYEWFHFFLEKEKAEATASGLSVFEVADRMAAQIAPEECDLLFLPFLFGSNYNP  
EARAGFLGFSAAHTRAHMIRAVLEGIAFSHKTHLEKLVTSRRNLMQREAPPQGIPPNPEP  
EINEKRTVVRLTGGA AKSRLWVQIFADVFMPIETVISSEPGALGAAIAAAVACGEYRDL  
REAAGYMVHLADRFDPTGKSDIYEHKYSLYRDMTGSLDQTSWGFKR\*

>SPBDM4\_v1\_70270|ID:27159728|aroE| Shikimate dehydrogenase [Uncultured spirochete bdmA 4]  
MPNRNYKSELVGVFGYPVAENPTVMMEEAAFSLHGLNWRYLTIIEVRPEDLADAVRGLKAF  
NMRGINLTIPHKIEVMRYLDEIAEDARLIGAVNTVINREGCLRGENTDGGKGFISLKEKA  
GEIIPGADVLLGAGGAARAIAVELALAGAAQIGVANRGRDRGETLVRLLNERTQCQARY  
IPWDTALRVPEATQILVNATSIGLFPAVKESPHMDYDSIQKGLIVCDVIPNPPDTEFLKR  
AAQRGAMTINGLGMVLNQGVI GFRFWTGIDAPREIMIRALSREFTA\*

>SPBDM4\_v1\_70271|ID:27159729| conserved protein of unknown function [Uncultured spirochete bdmA 4]  
MSQM TTKTVPD SPENPLKICVFCGSS LGNHPSYAELAVKLGRTLAERGMVLVYGGGNVG  
LMGTVAEAAMNSGGKVI GII PQRLFDLVEQQELTELLIVKDMHERKALMQKKADAFISLP

GGIGTMEELFEVWSWRYIGYHQKPVAILNIEHYDRLLEMLRHMVGEGLFHREIYDDLIV  
SDNIEAVLEAIHGKARDSGAVPFLKKPERRR\*

>SPBDM4\_v1\_70272|ID:27159730|pncB| Nicotinate phosphoribosyltransferase [Uncultured spirochete bdmA 4]  
MNCNYQTALFTDFYELTMAQGYWKRHMTMPVVFDFYFFRRHPFGGGYSVFAGLATLMEALE  
GFSFSKEDLEYLSTLGLFEDGFLDHLSSFKFKGTIYAAREGEIVFPQEPLVRVEADLISA  
QIVEGLILNVLNFQSLIATKTARIWNASGRGAIMEFGLRRAQGADGALSASRAAFIGGAV  
GTSNTLAGKEFGIPVLGTMAHSWIMSYPNELEAFEAYAELYPKNTVFLIDTYNSLESGII  
NAIKAGKKLIEKGYGFGVRLDSGDIDYLSRMIRGRLDEAGLPDVKIVVSNELNEEIIESL  
VDGKAPIDVWVGVTNLVTGGNDAAFAGVYKLSAIDPEGQGRPVMKFSNPEKSTNPGVKV  
LWRLYDQRGAARLDLISCSEEEIQEGFEYLVHHPSADWRQLKIVPARVEPLLFKVMEHGA  
RIQGLPDIHIQAFMKERIQTFDSTYLRLNPHIYKVSVTDRFLNFKVSLINAFFKQKLS  
QG\*

>SPBDM4\_v1\_70273|ID:27159731|pncA| Pyrazinamidase/nicotinamidase [Uncultured spirochete bdmA 4]  
VDSALVAVDIQNDFCPGGVLA VPEGDSIVPKVNALLAA YPLSILTQDWHPLMHCSFASTK  
SLPPFSLDTSVTPPSILWPDHCVAGSTGADFHQALQTRWRARFILRKGMRKTLDYSAFFE  
NDAVTPPTGLAGLLSSLGIRRLVCGLATDYCVKATALDARRIGLDVVVEDAIKIDANP  
GDVANAKEQIRALGCTFASTSELSAKA\*

>SPBDM4\_v1\_70274|ID:27159732| exported protein of unknown function [Uncultured spirochete bdmA 4]  
VNLRLVHVGKKKLQCAAIFVLLPLTAALS LDASARSVSGNISLSTSTTGTRAYLSLILPF  
DALINASMPLSLDSEILNSAFTAKGKLGGLTLAAGKLIKSDAASFLARPDLVSSRGSLL  
MYSGNLGSASDPLGISATSSRLSFLAKGEIYSCGALQYFLDNPARVAISVGALLDEED  
QNSVLHRMKPWLALGSGYSVSNISFLARLHVYPDMEAHRGDFSWLKAAAGRLDISLRASK  
QKMKGFLEYAETGDFISATGKAASHDAMAQLDYEVDISRIPLFKNFSAGLSVFSKQGA AVP  
VMGDTPSFGTLDPDFALKYWPDGKGVHFGIENKEVRTHVFDADVGLSPSFGTVAREEGQ  
WSGKMGFDLDIRSAGPPAPRSPAPQLGLGFALQASCSEQDASEAEDGDFSGISEYEESD  
DTSATARNDMGKFI FDRVLVALRTAFDPFSCSVSTDVPLKHSDSDALRVQIRASAKMPHF  
FVEASGTGKFEMGAKQFSIASAHLVVKIPL\*

>SPBDM4\_v1\_70275|ID:27159733| Uncharacterized glutaredoxin-like 8.6 kDa protein in rubredoxin operon  
[Uncultured spirochete bdmA 4]  
MSVTIYTTPSCSYCRMADKDFRQNGISFTEYNVAADMHRAEEMMHKSGQMGPVIDVNGR  
IIVGFNKLEIERALHR\*

>SPBDM4\_v1\_70276|ID:27159734| conserved protein of unknown function [Uncultured spirochete bdmA 4]  
MNQDKAREILEAIEPPPAPFTLVFSGRTNKKVNGLYKPAKSEIVIHNRNFDSENQLIYTA  
IHEYAHHILFTRRGGLMPRPHTQELWALFHILLEKAEQLGLYANVFDTVPEFASLTAEI  
KSRCLAGNGSLLLELGRLLVQVEELCRIHARFEDYVERVLGLPKRTASTAIQAQTLNLD  
PSLGWDGLSLVASIRDPEARSKAAEALSRGATPLIAKRTAMPPEDESDDPIETLIAEHKR  
LERSIASMTERMHRIEKLHSGISEDDIAL\*

>SPBDM4\_v1\_70277|ID:27159735| conserved membrane protein of unknown function [Uncultured spirochete bdmA  
4]  
MLQMIQILILLAFLGALAAASRLAPKPRIVEVSITAALWLLFSMGRFRIGNDPELVHS  
IGTIGLLGFVAAVCTIAGSCAAVWLMSRLLPQAGAFQKQKPVIA TSFNVALDPGGHKDEK  
ATASLVRRMRPPATLLAVVLAGFVTGILLPEAGFNPGIITEWTLNVLLFLIGMQFRQSN  
PLVNMLKSPAVIALPLATAVGSLLGILLAPLFSPLPRALALASGFGWYSLSGVLISNL  
GDPMLGSSAFLANMIRESLGLLLIPVLGQTRVPAMAVISVAGATSM DVSLPLIEQTLGPEA  
VPLSFISGAFLSALVPVLPVLFMKL\*

>SPBDM4\_v1\_70278|ID:27159736| putative Dihydroorotate dehydrogenase B (NAD(+)), electron transfer subunit  
[Uncultured spirochete bdmA 4]  
MRQLNAPVVINKAIAPNWVHLAFEWPSDLQEPKPGQFFT VLPAMVELGAGTLLRRPLAFA  
GFEPKQKKNALSGKSSAIVHAIYQIRGPGTKALALQAPGSRIDVIAPLGNSFPWPRQGE  
KAIAGGIGIGPMLFLAASLFQENLQLGGPEFQLVLGFRSASLIPLRVGFSDGGPMASL  
WKELLSRAFFATDDGSEGFRGTVDALSSLKPKETSPEAWHIYGC GPGPMLASLAKFAKT  
HHIAAHFSAEQWMACGVGACHGCVLPASGDFLRVCADGPFVFEADRIDWEAGLR\*

>SPBDM4\_v1\_70279|ID:27159737|pyrD| Dihydroorotate dehydrogenase B (NAD(+)), catalytic subunit [Uncultured  
spirochete bdmA 4]



MNAEKKQNVFSPADLDLSVHIGSLAMSNPVGVAASGTFGYGEEYDELVRIDALGALYTKA  
VTLEPRRGNPAPRLVETPMGLINSIGLANPGVEGFLQEKLPLLRHRCAIIVNVAGSTED  
DYAEVIERIEDHIAVAGMEPGERSGVDGYEINVSCPNVHKGGMSFGIDPVLIGRLTRSLK  
DRTRRPLILKLSPNVTDIADIARAAEAGGADAISCINTVVGMMVIDTEKLRPAIARGAGGL  
SGPAIRPIGIAATYRVSRAVHIPVIGLGGIAHPSDAIQYLLAGAQAQVQIGTALFSNPRAP  
QEVLDGIIVWMQRHSVHSVCDIRSMLEEPE\*

>SPBDM4\_v1\_70280|ID:27159738|pstB| phosphate transporter subunit ; ATP-binding component of ABC superfamily  
[Uncultured spirochete bdmA 4]

MMQEARIQTSFILETKDLSVIYGDGNQGVKHVSIGFQERNVTAIIGPSGCGKSTLLRALN  
RMNELIPGTHTLGEVWYNDKNIYDASIDPVLIRRHIGMVFQKPNPFPKSVYQNIWAAKV  
HGYSGSMDDELVESSLRKA VLWDEVKDKLKKSAFALSGGQQQLCIARAIALQPDVILMDE  
PTSALDPIAASYIEDLISELRNDYTHIIVTHNMQQAGRISDNTAFMLMGDLIEVGPTKKL  
FIAPEDERTERYLTGRFG\*

>SPBDM4\_v1\_70281|ID:27159739| Phosphate-specific transport system accessory protein PhoU [Uncultured  
spirochete bdmA 4]

MPREAFERSIEEINARITAMGAATVDALQKAMYAFCERDLDLAKKIKKADAQIDIQQLEI  
DDLVAATTMATQQPVAKDLRLLLCAIQMASDLERGADYAAHLAKATKFFAQEPQWRQTEML  
EQMANIGASMITGTVNAFIERNALAAARQTSMLDDQIDHLHKSVIKEMVLLSTRPDDAEK  
VAKFIQVSGYLERLGDHMTNTCESILYMVEGIHVELNI\*

>SPBDM4\_v1\_70282|ID:27159740|phoB| Phosphate regulon transcriptional regulatory protein PhoB [Uncultured  
spirochete bdmA 4]

METILVVEDDRDIAQMIATSLGKVG YHVVIQQDAEHAHAFLRDGVVSAILLDLMLPGMDG  
FAFIRKLK KDPALSAVPIIIASAKDDDADV VAGLELGAEDYIVKPFSLKVLEARLRAVIR  
RHDSSVQSEESGARLQKMGILLDSSRHEVRNENDIVDLSATEFAILELLMKNPGRVFSRE  
RLITEIRGGDVA VTERSIDVHILAIRRKLNEKGALVETVRGVGYRFRDE\*

>SPBDM4\_v1\_70283|ID:27159741| putative Histidine kinase [Uncultured spirochete bdmA 4]

MKNTNSRIPMSIRRLFWGLLGLICSALISLFIADTYNNTLIACAVFLALSIVL FVALFH  
LQNAVYQRPLTALASKVGSLSLSTKSSDTALHEISGTEAHPALEPPSASGQPQDIPDE  
FAKIEQNLDLVAENLNAQSREVELAGRLQSIFDATEEAIVAIRAPNELLAANTAA YRLF  
ELPKNPAQTAESFFFKAPPIIGLIDECLREGHALLEQFSMLKEKNEVILTARGRRFRVGN  
SDGVVIVINDVTSLKRMELLKKNFVANVSHEL RTPVQIVKGYAELLGGAEISEEYRNWAE  
VIGHQAARMERIVADLLMLAKLEHDPASWIVREKFFLKSVLAEAARTVRLQYADSGTIEL  
DCPEELEAYANPGLIEQA AFNLMANAVQHSGSHEKILVGAVQEENDVVVRVRDFGAGISP  
KDLAHIFERFYRADKSRSSASGEGTSRIPSSGSGSLGLAIVKHIALAHGGAVRAESWAGE  
GSLFEFRFPNATEDSIAAARPEDPSSIPSSS\*

>SPBDM4\_v1\_70284|ID:27159742| conserved protein of unknown function [Uncultured spirochete bdmA 4]

MGHEKAFTSERLVVGVLS SDEGAEDAALDAMAKLYGPLCFRSAKEPFLWTKYYCPEMGEN  
ILRSYWAFEQLIDPSGLASIKRATDAIELKLAENGRRKVNLDPGMLGTARFCLATTKDRS  
HRIPLADGIYVELTLIYERGEFRALPWTYPDWASEPVRMMMAELRTGLLAELRRLNLL\*

>SPBDM4\_v1\_70285|ID:27159743| ABC-type transporter, periplasmic subunit [Uncultured spirochete bdmA 4]

MNSRSLAIFAIAIILAPLAAQDQETEFVTVYGAQLPELDPQKALFSNEAQIHTALY EGL  
FTYDPQSLEPVRALAQSWERSTD KKVYRFTIRENARWSDGTAITAEDFVRSWFRMLDLNA  
DYATFFDVIAGAKDYRTGRDRNPEHVGIKALDARTLEVTL LRPVAYFTRLLCHQSFSLIH  
PSMLNVEDWRTAIPYPVSGPYKPVSM TDEELVLKKNQYWD AENVSIPTLRMMFTDDDAL  
ATSLFNTGHVHWLDGPGTYEQVLLQTAIQIFPIYSTHYWFFNCRSAPWNDQVRRALALL  
LPWDSIRSSDLYRLPAATLVLPLPGYSKTKGIEKADHEEAMKLLSESGHPNGEGLPGIVI  
AFADYERPRSIATAFKTEWEKELGLK VTLKPMSPSSYYDTIGNRADTASFTIAHETWIGD  
FADPEAFLQMWTSGAPLNIAGYDDSVYMDYMNQSYSAGDDARMALLAKAETELLQSAACL  
PIYHNFAASIIDTDYIQGWYQNALDVHPYKYL RFGMPSVNPVVRADTAVGALASAAGAS  
SSK\*

>SPBDM4\_v1\_70286|ID:27159744| Thymidine kinase [Uncultured spirochete bdmA 4]

MQSNDETGEFLKSLGFPQLNIHTMSRHDFISAGKRILVIGPMGSGKTEFSARVWRDSRV  
ALKKKGAAARLTSSGNVDRRDIFIVRSALDKSRFPDYPEDALAYRGGYERCGDRIGSAKD  
SFSLEMLIAENPAVGTWVIDEAAFFDERIAYLMKDEAESRGLCFIYPTLVLNFRREIFNQ

TARLLETATDIVPLTAYCEHEECLKDSLYTYRYYLVDQECPALYFDPLIIGGDRTKH  
DGREPNYCTRCDEHHYLPKKEYTFFTLKPLGELAARGNIAPLLAELNALQGNIKDSRLYA  
SIESRCTEGQEHEVQMNALKVPLIAERALVYLYAEQNLSEEQMRFFISELNLDKDYLSQ  
RLADNRRPLALYERPVPASFA\*

>SPBDM4\_v1\_70287|ID:27159745| putative Threonyl/alanyl tRNA synthetase SAD [Uncultured spirochete bdmA 4]  
MNARALDERLFYRNPWLSEADAIVMATEWEDGVKPGHVRVLLDTTIFYPEGGGQPPDLGF  
IERARVVDVQEIDGQIWHFVEIPPEAGNGGAWLAQKGVVAGASVHLRIDWQRRLYHMQQH  
TGQHLLSAVLEQDYGIHTLSFHLGTDYCTIDVSAKNPADLPLEEIEAKVEGWIERDVLVR  
IHYCPPEDVAAFRLRKRPPADEAVIRVVEIDGYDWSPCGGTHVERTGQLRALKLLSLERY  
KGNVRVYFAAGAHALELLFKAYEEAKQAALLLGAGVGDLSARLRDSMEKTAHLEKKTCC  
AQQRAEAEARLAISQTEPEAVLEFKLEDEDAERGTGLVKA AAVLGRAAIAVSLPDSTVVV  
QVVQHGNFPALAE LLKEKMTALGGKGGGGATFFRANFASPDQAVLFAGYAKEALGTGRS\*

>SPBDM4\_v1\_70288|ID:27159746|smc| Chromosome partition protein Smc [Uncultured spirochete bdmA 4]  
VLFILLKRECLVYLKSLIFGFKSFADRVRIEFSQGISALLGPNCGCKSNIVDAIKWVVG  
EQSAKSLRAESMEDIIFNGTENRRPLSVAEVAITISNDGGALPLDVPEIEVKRRLYRSGE  
NEYFINGKQSKLKEVRELFWDTGIGKSAYSVM EQGRIDQVLSSKPEDRRYLFEEAAGITK  
HKVRAREAE LKLAKTEENMRQIEGIVREV KHSYESLKVQAEKTVQYRQLKDKIFETELDL  
YLVRLRQYVRERDRSSAAF DQKKKEREALVQRIDNMSASMSEGLDLVNELEAILVEMQKL  
LYGLAVEKNGKENQKTLLAERCRELKTKIEQLQGRDRAIAAKIESLQDEEKEKEAEYAGY  
RARIREVEANIHTFDENISAAALS VKANEGTIRQNAEESKEIGQKTAQLRQELDTITERI  
AQLVDERLRQSETQIEQRQKLEAQIRQGITEIALSVASRADRLQDYARIATLSSQERAQ  
EIERLSADLRELSSKSKWLEKDFQYIAIAPSFLNELVAPEGVMTQKRRIDA AISAHAER  
LREIDTENQALSARNGDLAKKIEIYRRTLEEARMEKTKIQAQMEAAQDALS VLRREIAGQ  
ESYRREIANELAGEQRRLEDELDEELGTLEELAEIEQKGRRLSEDMTELENSISQRTADL  
AEKRKESDLEQKLQAMQQELEDLHMAMAQSETEIRNLKDTFTEL YSRDL S AYETRM YEI  
RRPIVEIREELASL KSSLG SVNLMAPEEFEEVRQRYEFLT GQYEDMVKARTDLVRIT  
DEIRTESAQLFVDTYNRIKKNFHNMFRR LFGGGRAELRLLDADHVLES GIEIYAHPPGKK  
LENISLLSGGERTLTAIALLFATY MVKPS PFCFLDEIDAALDEGNIIQLV NLLREFGTAS  
QFIVITHNKKT VACADTLLGVTMEESGITKTI AIRVQ NENG VVRPVYVRDQPFEEDIDY  
EEGRQLDDKGSMTVTGA\*

>SPBDM4\_v1\_70289|ID:27159747| putative PTS IIA-like nitrogen-regulatory protein PtsN [Uncultured spirochete bdmA 4]

MDDDILTIEEVAKYLRV SERTVYDWAQKGEIPSGKIGTVWRFKKSEIERWVNERLSSNRP  
VAFISSVKIQNIISPDRILFLNYP SKRDTLIALSEN LSTAPQIKNRQELISEILRREELM  
STAIGKGIAPHVRLNSVTDLVISIGISRC DITDFQTLDDVPVRLLFMIAAAYNQHAYYL  
QTLSSFFSARLKVVELRDGLLGCKTANEA YDLLIQDQ\*

>SPBDM4\_v1\_70290|ID:27159748| protein of unknown function [Uncultured spirochete bdmA 4]  
MAMRIESVREKASGTLEVAVSGGLMFNFD AKDLQMLGCSFDRGTRTLMAADRTAVTLVGD  
ESFDEGAVSVLDRLNALHKARKDALSIVSRAEQASKQLYEKLLKRGYEPEIARTCLLWMC  
TERYVDDRRYV TLLLQSHL VRRGQGPDRIKTIAWPRVGLFENPKLILADGFAALEEDSMQ  
EAIRKNTANILRRTRTFRANRGFGRNLCRSSNARGMSGDDSEIEPKNLSFAERRSLLRA  
RLRNEGFP SKSVEKFLESWEIEENGKG\*

>SPBDM4\_v1\_70291|ID:27159749|rpsI| 30S ribosomal subunit protein S9 [Uncultured spirochete bdmA 4]  
MVKNINLIGITGRRKCAIARVFLREGSGKIINQKDLKEYFPVEGLVAQVRKPLLVT DSE  
NKFDAYITVIGGGPTGQAGACTHGLARALAQIDPANHVSLKAIGLLTRDPRMVERKKYQG  
RGARRRFQFSKR\*

>SPBDM4\_v1\_70292|ID:27159750|rplM| 50S ribosomal subunit protein L13 [Uncultured spirochete bdmA 4]  
MKTVFVTAATAERKWIIDAAGKPLGRVAVKVASILRGKNKPTFTPSQETGDYVIVVNAD  
KVMVTGRKRQNKMYHYHTGFPGGIKDFNFNELIGRNPVSPMEIAIRGMLPKGPLGRKLFK  
NAKVYAGPDHPHVAQTPTAIDL\*

>SPBDM4\_v1\_70293|ID:27159751| conserved protein of unknown function [Uncultured spirochete bdmA 4]  
MTALLVGIGLIVVAVLMVLP GILGWGNDVLAFLRGALPVLA V LIGALAVFIGIADIKDKV  
EEKREEEKEKSENSEGEQEKDVEKKD\*

>SPBDM4\_v1\_70294|ID:27159752| putative enzyme [Uncultured spirochete bdmA 4]

MLPHHSLVMYKTKPAIVVAGDPDRILIHLDIGEERRVRSKDVVLLHNGPISSFPKELPSA  
EAEVALELLRDEHPEGLALISWKEFVELAWNDAPHEIVTAWHSLLDNSAVEILEDGIRI  
RSSEEQKLLLEKEKKRKEIVETKAAFIESFRGAWKNHDPALIDKNPLFQQFFDELSCAR  
GFSDESPIARELGKIMTPQAIHETLLATGYWNMAFNPWPERNGCILSSPPAPDAIAERAD  
LALERLDRHLSSY AIDNAWSDDPDDAISTDGERIWIHVADPAAVISPMKLDSEAMARG  
STLYLPEKTVPMLNASLVQTLGLGLSSESKALSFGITLREDGRIAETLIVPSIVKVERLT  
YEQADTMFESSPALQKLHGMAEIRAALRRSQAVIDIDFPEVAIRVSDGNPAFLPVPHTRS  
ARIVQELMILAGEAAARWAYERNIPFPFAAQDSPVSEKLAGCGLGPSQSLAENYGRRRIM  
RAALVSSTCSAHAGLGLSFYSQVTSPLRRYQDLLAHYQIHAILARERNKHSAPAVRTPA  
PLDLETMNERLYLYSQQAANKHQAERDSRAHWTLVYLSRHRDWKGGQIVLDASAENGQIL  
IPEFGYETQMRIPRGIKPDENVILALRRASIPELSASFILPQSA\*

>SPBDM4\_v1\_70295|ID:27159753| ABC-type transporter, integral membrane subunit [Uncultured spirochete bdmA 4]  
MKASQPRKSGTVIAEIVTAIIFLLFLFPFLVLINSAKTSFEVTQYPLALPTRWGNLIDN  
IVKIWTSESVRYPSSLLSSIIITAVSLVLINVFSAMAGWALVRTKTKTSSAIFIFVASM  
VIPFQIVMFPLLSWFRVTVDVTGIRLLRTYQGIILSYIGFGAPLSIFMFHGFIKSIPLEL  
EEAATIDGCHKHQIFFKIIFPILTPIQATVLVLNGIWIWINDYLLPLLVLGKGNVMTFPL  
AVSNFAGAFVKQWDLILTAILLAMVPVIFFLFAQKYIVKGMVAGAIAIK\*

>SPBDM4\_v1\_70296|ID:27159754| ABC-type transporter, integral membrane subunit [Uncultured spirochete bdmA 4]  
MTKKTESRVVFWAFLAPVLF AFIMVMIIPFFLGSYYAFTNWTSSARVDNGLRFVGFKNFT  
NSLKDPSFLYSFGITFVY TILNMIAINVTAFA LALLVTGNLRFKNVYRVGFFVPNLIGGI  
ILGYIWQFIFNNAVPSLGTIIPALSFLADPKLILGKNTSALAAMIIVGTWQYAGYIMMI  
YVAAIENIPQELIEAAKMDGATPWIRLKAITIPCAQSFTVTMFLTLVNSFKQFDVNVSL  
TSGGPSTMLMGKPI LGTELLALNIYNTAFISNKLSEAQARAFVFFLVLAIIISLIQVYVVK  
KKEIEL\*

>SPBDM4\_v1\_70297|ID:27159755| Extracellular solute-binding protein family 1 [Uncultured spirochete bdmA 4]  
MKRIALAFMVLLTATAAFGAGKLTLMQNKPEIDAQLKAYAATWGQKNGVTVVIKSIGGTS  
GGMGPQLKADYAAGDMPDIFAFDGLSEFKDWEGIILDLSKEPWVSKTSVAFKYNGKVYGF  
PVAVEGWGMAYNADLLAKAGIDPKTLNSYDAYKKA FEKLD SMKGELGINAVVSMTASVEM  
GWVTAHNFNSLLSNGLPYGDL SVVNDLLAGK VDMQRLQEYADWV ELLFKYADR SILLTG  
NYDAQVGAFATGKT VFLHQGNWVDPNLKAANATFKMAFAPHGSMKKTTDGIFVAAPS FYA  
INKESKNVALAKKFLNDMVT TTEGQNYMVKEAGMIPAFSGINLNP DGQLSKSVQQWAAAG  
KVYSWDQYYFSGDFRDKVLTP IYNQFAGGSITKAQFVDLMTKAFKDNAQK\*

>SPBDM4\_v1\_70298|ID:27159756| rbpA| putative RNA-binding protein RbpA [Uncultured spirochete bdmA 4]  
MGKKLYVGNLSYNTNEDSLRNL FQTYGTVESVKVITDRDTGSSKGFVEMGTDAEASAA  
IAGANGFDLDGRQIKVNEAMDKPRRDNRRY\*

>SPBDM4\_v1\_70299|ID:27159757| Nitroreductase [Uncultured spirochete bdmA 4]  
MPLLKSIEMRRSFRALDEKPIQNEILLRLAEAARLTPSWGKQPWRIVTVTAPSQLTALK  
ATLTPGNYWAKKSPAIAAFVTS LDWDGRLDDGRDYALFDLGMAAMAYQLQAVEGLIAHP  
IAGFDAASAKRVL DIPETAILETLIILGFPGDPSGLSEKHLASETSARLRKPVDEIAGFD  
RWSQQLVPQRD\*

>SPBDM4\_v1\_70300|ID:27159758| Aldo/keto reductase [Uncultured spirochete bdmA 4]  
MKYRKLGN TG VIVSEVALGTMQFGGTMNMGNLGQEATTKMVKLALDSGINFIDTADVYSR  
GESETLLGNALKGIRDEIVL ATKARLPMSDNNFNRS GATRLNIMREVEGSLKRLQTDHID  
LYQIHGWD SNTPLEETLHTLDDLVRQ GKVR YIGLSNYLSWQAAMALSLQERMGLEKYATA  
QMHYSLVNRGLEYEFQSFAEYANLGILV WSPLAGGFLAGKYGR TAPAPEGTRFAEAGQFV  
PFDKELGYR VVDALKEVAGR HGVNPAQVALAWVLSKPAVSSVIAARKAENFADDIKAVD  
LALSDEDMQLLDKVS DPGVPYPKWMVLQLDTAEDPRPKVLHPERYADGGSWKDLRGTKWS  
GAH\*

>SPBDM4\_v1\_70301|ID:27159759| Glycosyltransferase 36 [Uncultured spirochete bdmA 4]  
MKRSKRGSVLLSYFEKREDAESARKK LKRKHFRITLLSNATDENMRPPGTPFRGRRQK  
YGAEDKVPKEDARALLPGETVL VVRASIDTLHVAVTLLREDSIPPAVFILHDKVSKAPE  
KELRRPGVPLSSAQILDHAERL GIEHHIERRPRRSRELLARLDSA YHLTRGTCAELSMAG  
RLEQGTSATAEWILDNEYVIESNTRDIRINLPTAFYRRLPTLAVGKSKGLPRIYDLACEL  
IANMELRLDRENILAFIDAYQSSCPLAIGELWAIPQMLRIALIESISDFALKVSIELRER

ESADFWAHLRIKANRQGPDLQFSILAKLALRFPSPSPYFATQLIDHLYDEEAVLVFVQGW  
LERTYHQPLSGISLREQNRQAKDQISVGNFTSLRQLALLDWREIFESLSRVEHLRDEP  
CGIYPGMDFDTRDRYRRVVEELSRRSGQAEDQVARQALALAKEAMNGAPCTDERRKHVGT  
YLIGERQELVRRLHCSESRRYRLLHWVYRNSSTVFFFGLGILTGGPTILLAFSVPGLA  
FGIRVLLALLLALPVSQALALELLNYLVARILPPRVLPKMDFEVSGVDPQFRTLVVVPVLL  
GDAQSIRSDVEKLEVRYLANNENLLFSLFTDYRDADEEHRKDDAELLRVAVESIESLNR  
RYGAGHFFLFHRERRWCESERKFIGWERKRGKLEELNGLLAGTRPEGSPELVYVGNKGAL  
AAVSFVITLSDTQLPPGTARRMIETLAHPLNQRPFDEAGKVLGASYTIIQPRVSPSLPS  
TSASLFGRLFADAVGIDPYTKAVSDLYQDLTGEGSYYGKGIYDVRAFNRVLCGRFPEERL  
LSHDLIEGAYVRVGLASDIELYDEFPPNYRAASERQHRWIRGDWQIGQWISPRVPVQKKG  
LERNPLSRFDRWKLFDNLRRSLLPAANLVLLASWAVFPQAGWIASLVVAAQLFSHSLAM  
CFTMLTTWRGANRLSLSLAHDLRALADAALLPHQAALGMGAMLRTEYRRHISHRGMQLQ  
WNSAQAMPVGVPEKSQIPALRMVPSAGSILTAFAISLWLPASLTCAGPWLAAWSLSPLV  
AWLLNLSRAHQRQSALPQADTKFLREISRRTWRVYFDDFVDAGTSWLPPDNYQFSPRNL  
ALRTSPTNIGLWMLSALSAHDFAYLTVDQVVQRLTGTVETLGSLEFRFKGHFNWYDVRTR  
TPLEPRYVSTVDSGNLLGSLWTLVQGLDELFRQPLLDEKVFSSLQDTGRILWNIMRQGH  
PGGHTGGDRVQTLGSLMKEWEAPPPRFVDMLGLLRQELGKIEASGKAVRPSTDEGAEAY  
WVAQIEKQLSAWLNIVDRYLAWMEILAEKSEEEVAALGPKAAEA VRRDLSRVPSLADLAK  
GRVDCIEVLKDVRGAAPQPTVPMCAWLDRLAEAFSKSRWLAGEMLGQGERLIRDCSALSE  
QMDMRFLYDPERRLFAIGYDVSESRDDSFYDLLASESRLGSFVAIARGDVPFEHWFALS  
RPYAKLGRHRVLLSWTGTMEFYLMPLLFQKSLMNTLLEDATRGAALAAQMDYGRQNQVPWG  
ISESAFADMDINRVYQYRAFGVPLRLKREPEEKIVIAPYATLLALGIAPRESVRNLRDL  
VDLGLLDVDGFIYESIDFSRQPGQNGERGVVVQTYMAHHQMSLLSLTNFLFEGSIRRSFR  
ADARVRSVEALLQERIPNLPASHYIPTREGERSVQSVVEATPSISKFDTAHTRTPKTQLL  
SNGRYSVMVTNAGGGYSQWGTQEITRWRSDPTRDSWGTFFYIHELSDRLWSPTYWPVGR  
KGEDCSASFALDRAIFQRFNGIHARVEIVVSPEDDVEIRRVTLTNRSLRTRHLDCSSYI  
ELSMAPHAADRQHPAFNKLFIQTEALPPQHALLAFRRPREGDAPPLYVAHRFTHEAGGEE  
TMRFETDRTRFIGRGRSLANPRGGTEEPQNSEGFVLDPILSLRSLAPGQRTVTVSLVI  
AAGGTKEQVLGLMGKYADPHAIDRAMDFAWAAAQLELRVLRIQPDDARRFQQLASHLLYP  
NRLRSQAGKIEENTQGQAGLWRYGISGDLPIALVTIGEIRDVGLVGQMLQAHTYWRMHG  
LMADLVILAEAGGYERPLHERLEGLIQAHSNTTGRDKPGGVFLRSADQIPEADLTLLLA  
AANIVFMSARGTLAWQVGVPGEMRDQREKPAWKNAVQDPVTPLPFLELPYFNGLGGFTPD  
GREYAIYLDADTNTAPWVNVIANPSFGTLVSEAGSGFTWSGNSQRNRLTAWSNPVDVDP  
ASEALYIRDETTGLCWTPASPIREKAAAYRARHGAGYSVFEHNSNGIDQELTVFVPMDKS  
GGQPVKLQILRLKNSSARRRSLTYVVEWVLGEHSETSRMHVVTAWDDEMQUAITARNSF  
HPDYGDRIAFAAISPNDSYCGDRSFLGRNGSMKSAAMGYVELSNKTGAGYDPCAALR  
LSFELAPGESTEITCMLGQVESREAALALVLA YRKTAAAEAALEGTKAWWDDLGVVEMH  
TPELAADFLINRWLLYQDLSCRWGRSAFYQSGGAFGFRDQLQDVMALLYASPGLARDHI  
LLAASRQFKEGDVQHWHPGGAGIRSHISDDLWLPFVVAQYVVRTGDVILNTQVSFL  
EGPELKEYQREAFFTPAVAAERASLFEHCRAVARGSTEGPHGLPLMGTGDWNDGMNLVG  
AGGKGESVWLAWFLVDVLRGMSEMSEALGLADLSREYLEKREALIGRIERSAWDGEWYLR  
AIFDDGTPLGSSMNAEGRIDSLPQSWAFLSGGDTERSRTALES AWKELVHEDEGLVLLFT  
PSFDKAVPSPGYIQA YPPGVRENGGQYTHAALWLAMAMARGGDGTRSGQLLRMLNPIEQA  
RTPEAVRRYSVEPYAAVADVYRLAGRSQGGWSWYTGSAAWMYRVWVEEVLGLKLRGDRL  
ELDPVIPGWWSGFRVNYRHGDARYEIQVENPENCERGVLWIEMDGLRLGNPLIPLERGP  
DHKILVRMGKS\*

>SPBDM4\_v1\_70302|ID:27159760| membrane protein of unknown function [Uncultured spirochete bdmA 4]

MLFATMKLWLKYAFGIIMGAVLYIALPPSMVHGTPAISFLAEISLKIGGYALILTAAASI  
PISVFRLSESHRFSKIDSSTLVFFIISLIIAAGIGLASTLIFRPAPLPLISDSGAMQSLD  
PLELIRSTFPSKIFSTFSGAATWFLPLALFMLAFGLALSHDPVMARPILPVLVISRAAY  
LINSFLSEILGIMLIPISLYLFLNLRDTGMLSEYKILVYSSALTILLVLVIFPIIRIL  
GGKSNPYVLLYRMMGPLLAAAASGSVFFSSGTALRHVSESLGVKRDNAVILPLALIGGR  
TGSVIIVASSFIAMFLSYSKNSPSVGQIALLLIIVPFSVVVGAAGLRSDILVMLS LTCML  
FGQGFQNGASLLVPVALPLSICAVILDSAWMMYSVALIAEHHGERTIKKARNFI\*

>SPBDM4\_v1\_70303|ID:27159761| putative PTS IIA-like nitrogen-regulatory protein PtsN [Uncultured spirochete bdmA 4]

MDLENLLKPELVTLDLKGRNKEEIIRELVDLAARSGKVMNKEEA VLRVFERENRMRTGMK  
HGAIIPHGKTTAVREL VACVGISKEEVDFDALDRKGCRIFIMTSLPIDKTGPHLQFLAEV  
GMLFRNEEKRQALLSAKTPEEVVSILLGNA\*

>SPBDM4\_v1\_70304|ID:27159762|groS| 10 kDa chaperonin [Uncultured spirochete bdmA 4]  
MNVKPLGERVLVKIKESSEKTAGGIIPQTAQEKQTQGVVAVGTDADVIVKVGDEVMY  
DKYAGTQIKMDGAEHLIVKMSDILAVLE\*

>SPBDM4\_v1\_70305|ID:27159763| protein of unknown function [Uncultured spirochete bdmA 4]  
LKYYKKTNRVYQARVLTFFALKSTIENVLRVVRQGVRLIRRKELYSYMDAGGSYDSGTNYRN  
ESRANYS\*

>SPBDM4\_v1\_70306|ID:27159764|ftsH| ATP-dependent zinc metalloprotease FtsH [Uncultured spirochete bdmA 4]  
MPSKGGKNNWSPNQKKPKDKNSNGSDKKPGMPEGPQFRFSLGYVLIALIVVSFFNYFLFKR  
DSSVVPYSMFKEKISSGEIKRVEIDSNYYTG YTDLKSSAPSSPLPASAKPGVVYKTVPI  
DPSFTALLDQKGVIIYSASPREGSAILSLLLNWVLPFAIMFFLWRSLMGRFMGSNSNVLAF  
GQKKATVVAEGDVKTRFTDVAGVDEAKEELVEVDFLKNPQKYTEIGGKIPKGVLLVGPP  
GTGKTLARAVAGEANVPPFKMSGADVFEMFVGVAARVRDLFKQAREKAPCIIFIDEID  
ALGRSRVSGIMGGNDEREQTLNQLLVEMDGFSTSLIIVAATNRPDVLDPAILRPGFRD  
RQVLVDRPDMLGREEILKIHSPKIKMDPSVDLSKIARSTPGLVGADLANVVNEAALLAVR  
AGRKKVKEEDFQEAIEKVAGLEKKNRMINPKEKQIVAVHETGHAITAAFTQGADPVRKI  
SIVPRGFSALGYTLQMPLEDRYLVTEEELGQIDVLLGGRAAEELVFHSISTGASNDIAR  
STEIAKRMITDYGMSSEKFNVALTKRGAGLPGSQQMADPFATREYSEETQRYIDEKIASI  
VDERYNHVVSLLEKREMLDRISLLLEKEVIEESEFAALTEESRSEKAIVGAMPVDAAV  
SSSTTESPALPASNS\*

>SPBDM4\_v1\_70307|ID:27159765|fabH| 3-oxoacyl-[acyl-carrier-protein] synthase 3 protein 1 [Uncultured spirochete bdmA 4]

MSVVIRSISSYVPPVRITNEELAARMETTDEWIRSHTGIGARHIAPDGVQTS DMAVSAAQ  
SALEKAKIGTSDIDYIIVATATPDYFGFPATACIVQDKLGAYGAAAFDVTAGCTGFIYAL  
NIASRMLESSHGRHALVIGADGLSRIVDWNDRSTAVLFGDGAGAAVVSRIDEGGRGCLSF  
ILGADGSGAKELYLVQPERTQAFDRQQPVVPVISMNGKKVYDFAVKSITVVIERLLHKTA  
YRLEDFS WIVPHQANARIVQAAAKRFSIPMDKIYMNIEEYANTS AASIPLALAEMDEKGL  
LKPNDLVMLVGFAGLTYGAAVVRW\*

>SPBDM4\_v1\_70308|ID:27159766|fabF| 3-oxoacyl-[acyl-carrier-protein] synthase II [Uncultured spirochete bdmA 4]

MQIEVAVTGLGIISPIGTSVDEFWKNCTHGVSGVGPITHFDASKVESKIAAEVKNFDPSQ  
WIERKEARKMALFSQYAVAAAAQAWNDAGLPENIESQKPGDKAHIDSDRIA VVVGNGIGG  
LDVFTESHAKMLQDGPDRIPPMTIPLMIANEAANIAMRFGIHGPALTQVTACASGTDAL  
GQALDLIRAGRADIVIAGGTEAAITEFAVGAFRCRLKALSTS YNDRPQLASRPFDRDRDGF  
VMGEGAGILILERLDHVVARNAKIHAFAGYGASCDAYHLTAPQPEGIFGAKAIELALKD  
ADIQPEDIDYNAHGTGTELNDPMESRMLKTAFGSLASTLKSSTKSMTGHCIAAAGAIE  
AIVCIKALETGVLPTIHLNPDTENGCDLDYIPNVAQSYAVKTAMSASLGFGGHNGMVI  
FKAADA\*

>SPBDM4\_v1\_70309|ID:27159767|fabZ| 3-hydroxyacyl-[acyl-carrier-protein] dehydratase FabZ [Uncultured spirochete bdmA 4]

MNDIESYLPHRPPFLFVDDVYIKDDTIFAEHTFHAEDWFFKGFHPEFPVPGVLLVESMA  
QAGGVGAKLMGIYPISLFMLAKIKEARFKQPVVRPGDTIKMEITNVRAS TVYLHQRGIGKV  
GDTIVTEAEWISIASGVPE\*

>SPBDM4\_v1\_70310|ID:27159768| putative reductase TDE\_0597 [Uncultured spirochete bdmA 4]

MILKPMVRNNICINAHMPMGCRAEVRLQTGRVKAFRDRLTNSGKNRGRGTPKPTHVLVIGCS  
TGYGLASRLVAAFGYGADTVGFSYEKEPSSTKPGTPGWYFNREFDALAVEAGLFARTFSD  
IDAFSDAAKDKAIELARERGFQYDLIISLASPVRTDPETGTLYRSVIKPIGRQYAGRTL  
DVFTGKIAEATVQPATEEEIAQTIKVMGGEDWQLWIDALDKAGVLGRDATT LAYSYLGGP  
FSWPIYRDGTIGQAKLHLEKTAQALNEHYQDAKGLRAFVSINKAVVTRASAVIPVIPLYI  
STLFKVMKERNIHEDCVDMIRLFAERIYRKGETQIPVDTEGRIRVDDLEMGPSVQNEVS  
ARLATVDESNLHKLADPDGFRNDFLRAHGFVPGVDYEQEVLSFE\*

>SPBDM4\_v1\_70311|ID:27159769| putative Ribosomal RNA small subunit methyltransferase E [Uncultured spirochete bdmA 4]

MNLCILNSSDTLQSLSRKDRRAQHILEVLKKKAGDRFRAGSTDGLVGWASLESITDERIM  
LRFIAEHPAPPLRPVRVMLGTVRPIQAARIVKELTTLGVSSIAFFPTTELGEKSYTQSNFY  
VQKEYYMHAQDGAEQAGNRLPEIGLVWSLKKALEQVEHIEVSAFKAPLQQGDGIQSADG  
TLPCCATKIVCHPDCAATPLSHMSLSGTPVILAIGTERGWTEHELEQFLQSGFALCALG  
DRILKTETAAAVAVSVVLARLGYF\*

>SPBDM4\_v1\_70312|ID:27159770|ziaA| Zinc-transporting ATPase [Uncultured spirochete bdmA 4]

MADKYYLKGLDCAQCANEIETALNKCDDVESATVNFATKLLIDGVSEEKVRGIVRQLEP  
EVELIAANDVAAGDNGAGGESDRAEIAKLVSAILFVAGSVFHTQLHNTPYVAEYAVLI  
PAYLLVGYPVLKSAALSIVHGRIFNEMFLMAIATLGAIAIHLPEAVGVMLFYAIGEFLQ  
DKAVDKSRRSIVQLMDLRPDFARVVENGASKTISPESVAIGQSVEVRPGERVPLDGEIVE  
GSSFVDTSSLTGESVPREVGPGDAVLAGYVNDSGRLVVRVTKEFCQSAVARILDLVENAS  
ANKAPTEKFITKFASVYTPVVVLAALIAVVPPLVIPGATFGDYVYRALVLLVISCPCAL  
VVSVPLGYFGGVSASRHKLLVKGANYIDAMTKIDTVVFDKTGTLTKGVFAVSEVPHNG  
FSGMEVLR YAAGAESVSPHPIARSIREAASAIGAAASVTNIVEKKG YGVVAVVDGHVMA  
GNDRMLHEHKVAHDVCDVGGTVVHVTVDDVYAGYILISDAVKDGAASIKELRRQGVHKV  
VMLTGDGETVAKKVAASLGIDEYYAGLLPQDKVEKLAAIKAQEPAGRKVAFVGDGMNDAP  
VLVSSDVGFAMGGLGSDAAIEAADIVVMDDDIGRIPLALRISAFTHSIVMENVVFALVVK  
GAFVLLGSVGRADMWEAVVADVGVSLLAVLNSLRAVRYNDKGLSVR\*

>SPBDM4\_v1\_70313|ID:27159771| putative transcriptional regulator [Uncultured spirochete bdmA 4]

MNDDLCSQYSISCSETAPELRA SLIDVAGLSELFKAMADETRVKILYLLSKRELCVCDLA  
YILETNLPAVSHHLRFLRVLNLVKARREGKMFYSLADEHVLALIEKAREHYIELT\*

>SPBDM4\_v1\_70314|ID:27159772|asnB| asparagine synthetase B [Uncultured spirochete bdmA 4]

MCGIFTITDIKGDPI LRKRALSHVKRLRHRGPDWSGVYSDKHGIICHERLAIVDVTHGA  
QPLIDAGTGRVLSVNGEIYNHRELRAKFLKPHDFKTESDCEPLLYLYDEMGPFLKLVN  
GIFAFVIYDPRDGDYFIARDHIGINPLYWGRDGEGNLYVASELKAIFDLCPKVEIFPPGH  
YYKGSEGKLVKWEYEPQWAAPGYIPTGEADLPALRESLVA AVKRQLMSDVPYGLLISGGVD  
SSIVAAIAARFAERRVETDGAEQAWWPRIHSFSVGLPDAPDTKYAKMVADYIGSQHHEIN  
FTVQEAIDALPDVIWHLETFDVTTIRAGTPMYLMTRKIKAMGIK MILSGEGSDEIFGGYL  
YFHKAPNRVEFHDELVRKLSMLHLYDCLRANKVTA AWGVEARVPFLDPEFLDVAMNIDPA  
HKMIRKDEGHMEKYILRKAFEGWIPDEILWRQKEQFSDGVGYNWIDSLKEYAEKEVSDSA  
MANAAYRFPVKTPPTKEAYLYRSIFEEHFKNPSAVDLVPDGP SIACSTPTAIRWDAAWAN  
QADPSGRAVRGVHDKSLV\*

>SPBDM4\_v1\_70315|ID:27159773| putative Predicted iron-sulfur flavoprotein [Uncultured spirochete bdmA 4]

MRSVVLAI SGLRESSFTEKMLDL CIKGLGENQEVHKFYPHKMNIGPCKGCRSCWKPKTP  
GECVQKDDFEQILDVYKRADYFLLATPLYFFDLPATVKNVIDRFFIILEPAQIKSVEGGS  
THPKRLGRHPKAALISSCGFAEIENFDLLRQHFR LICEHTDWSWSGEILVSEAGAAAAPK  
LFD RKYNLIEKAGAE LLEGMISQKTTNAIAAPVMPAEDYRRMVT LNFEGGVIAKAKVSLI  
AIKAMRD KKKIRE\*

>SPBDM4\_v1\_70316|ID:27159774|pepF| Oligoendopeptidase F homolog [Uncultured spirochete bdmA 4]

MTKTIPERSEISGEHKWNLSSLFKDDAEWERNFAILGAMLPEAEKKTDF SASADAFLD  
TLRAYEQYLILEERLGYAQLRAAEDEGNSTARGLFARFVGVSSQGQA AWSWLSPTIQAL  
GDDFVAGCLASQTFADYRVFLTKLRRFKPHVLSEAEERLLALQTESAQTAEAFSVLTNV  
DLNFGTVETPEGPKPLTQSTFISFMRMQDRSVRKAAYLQFYSHFEAHQNTLGALYAGSVK  
LDKYQAQVRKYPSARTMALFPDNVAEAA YDNLISTVNENLPILHRY YGLRKEILGLEGLR  
HYDVYVPLVKEVKASHGYEEAVDIVIEALKPLGEDYVRTLRNGLLGGWVD RYENK GKRS  
AFSAGSFIGEPYILMNYKDDVLDLFTIAHEGGHSMHSWHSARNNPFMCYNYTIFEAEVA  
STFNEQLVFSYL DHSSDDREKAFLVATRIDDTLATLFRQTMFAEF EKRAHEIAESGEAL  
TVDVLRKEYRALLEKYFGPEMAFENVSDMEGLRIPHFN AFYVYKYATGLSASIALSEKV  
LHGGKAERDAYLDFLKS GGSRFPIESLKL AGVDMSTPEPVEAACRRFAGDVEQLAALLQK  
K\*

>SPBDM4\_v1\_70317|ID:27159775| Transcriptional regulator, LacI family [Uncultured spirochete bdmA 4]

VGDGDY YLRQVTKRFDEPMSFVYNSSAMSKITIKDIALRAGVSKTTVSFALNYPDRISKE

TYKRIMAVEELGYVPNPFARTLTTKRLGAIGLLLQKIGDIFGNPHLAQVISGIGEECE  
QKEFSLAILPLIRGKIIIEARKSYVDGLLTIGVGPDHEVVSLLRKNHIPFVTIDGEESAS  
TINIGIDHKSAAREIMRHVLEQGFRQIAILSLEPDTKPSSESGHFSIVIQRLEGFQWALE  
ESGLSDDSRVYMQNCKGSIDGGYESARYLLSRERRPTAIVAMSDIAAIGALLAAKELGL  
RVPEDVA VAGFDDIPESVISAPTLTTIHQPAREKGI EAARMVMHMLDGAAGNHIRLPYEL  
VVRESTRRT\*

>SPBDM4\_v1\_70318|ID:27159776| protein of unknown function [Uncultured spirochete bdmA 4]  
MNCTQKTWARQSASSLDANSNHPPRRQSFCLVFTPFTHAILMTSLPPAAIRLYYIFTMD  
TLTVNIDGLNDISVPAGLSAQDIFERAGLTKGSSEGTA AFAPLAVFVNNELAALSAPINA  
NCSLSPVYPDSPMGAEVYRRSLCFLAMAAREIVPKRRLMVSMAIGNGYHYHFX

>SPBDM4\_v1\_80001|ID:27159777| Putative reductase TDE\_0597 (fragment) [Uncultured spirochete bdmA 4]  
MKERNIHEDCVDQMIRLFAERIYRKGETQIPVDTEGRIRVDDLEMGPSVQNEVSARLATV  
DESNLHKLADPDGFRNDFLRAHGFEVPGVDYEQEVLSFE\*

>SPBDM4\_v1\_80002|ID:27159778| putative Ribosomal RNA small subunit methyltransferase E [Uncultured spirochete bdmA 4]

MNLCILNSSDTLQSLSRKDRRAQHILEVLKKKAGDRFRAGSTDGLVGWASLESITDERIM  
LRFIAEHPAPPLRPVRVMLGTVRPIQAARIVKELTTLGVSSIAFFPTELGEKSYTQSNFY  
VQKEYYMHAQDGAEQAGNPRLPEIGLVWSLKKALEQVEHIEVSAFKAPLQQGDGIQSADG  
TLSPPCATKIVCHPDCAATPLSHMSLSGTPVILAIGTERGWTEHELEQFLQSGFALCALG  
DRILKTETAAAVAVSVVLARLGYF\*

>SPBDM4\_v1\_80003|ID:27159779|ziaA| Zinc-transporting ATPase [Uncultured spirochete bdmA 4]

MADKYYLKGLDCAQCANKIETALNKCDDVESATVSFATKTLVIAGASEEKARSIRQVEP  
EVELVAANNGSAGSSGNEQEEEGNSRVEIAKL VVSAILFVAGSVFHTQLHNTYPYSIAEYA  
VLIPAYLLVGYPVLKSAVLSIVHGRVFNEMFLMAIATLGAIAIHLPEAVGVMLFYAVGE  
FLQDKAVDKSRRSIVQLMDLRPDFARVVENGVSKTISPESVAIGQSVEVRPGERVPLDGE  
IVEGSSFVDTSSLTGESVPREVPGDAVLAGYVND SGRLVVRVTKEFCQSAVARILDLVE  
NASANKAPTEKFITKFASVYTPVVVLAALIAVVPPLVIPGATFGDYVYRALVLLVISCP  
CALVVSVPGLGYFGG VGSASRHKLLVKGANYIDAMTKIDTVVFDKTGTLTKGVFAVSEVVP  
HNGFSGMEVLR YAAGAESVSPHPIARSIREAASAIGAAASVTNIVEKKGYGVAVVDGHV  
VMAGNDRMLHEHKVAHDVCDVGGTVVHVTVDDVYAGYILISDAVKDGAAASIKELRRQGV  
HKVVMMLTGDGETVAKKVAASLGIDEYYAGLLPQDKVEKLA AKAQEPAGRKVA FVGDGMN  
DAPVLVSSDVGFAMGGLGSDAAIEAADIVVMDDDIGRIPLALRISAFTHSIVMENVVFAL  
VVKGAFVLLGSGRADMWEAVVADVGVSLLA VLNSLRAVRYNDKGLSVR\*

>SPBDM4\_v1\_80004|ID:27159780| putative transcriptional regulator [Uncultured spirochete bdmA 4]  
VNDDLCSQYSITCSETAPGLRASLIDVAGLSELFKAMADETRVKILYLLSKRELCVCDLA  
YILETNLPAISHHLRFLKALNLVKARREGKMFVYSLADEHVLALIEKAREHYIELT\*

>SPBDM4\_v1\_80005|ID:27159781|asnB| asparagine synthetase B [Uncultured spirochete bdmA 4]

MCGIFTITDIKGDPIALRKRALSHVKRLRHRGPDWSGVYSDKHGICHERLAIVDVTHGA  
QPLIDAGTGRVLSVNGEIYNHRELRAKFLKEPHDFKTESDCEPLL YLYDEMGPFLKHVN  
GIFAFVIYDPRDGYFIARDHIGINPLYWGRDGEGNLYVASEMKAIFDLCPKVEIFPPGH  
YYKGSEGKLVKWEYEPVWAEPGYIPTGEADLTALRESLVA AVKRQLMSDVPYGLLISGGVD  
SSIVAAIAARFAERRVETDGAEQAWWPRIHSFSVGLPDAPDTKYAKMVADYIGSQHHEIN  
FTVQE AIDALPDVIWHLETDFDVTTRAGTPMYLMTRKIKAMGIKMILSGEGSDEIFGGYL  
YFHKAPNRVEFHEELVRKLSMLHL YDCLRANKVTA AWGVEARVPFLDPEFLDVAMNIDPA  
HKMIRKDEGRMEKYILRKAFEGWIPDEILWRQKEQFSEG VGYNWIDSLKEYAEKEVSDSA  
MANAAYRFPVKTPPTKEAYLYRAIFEEHFKNPSTVDLVPDGPSIACSTPTAIRWDAAWAN  
QADPSGRAVRGVHDKSLK\*

>SPBDM4\_v1\_80006|ID:27159782| putative Predicted iron-sulfur flavoprotein [Uncultured spirochete bdmA 4]

MRSVVLAISGSLREPSFTEKILDLCIKGLGENQEVHKFYPHKMNI GPCKGCRSCWKPKTP  
GECVQKDDFEQILDVYKRADYFLLATPLYFFDLPATVKNVIDRFFIILEPAQIKSDEGGS  
THPKRLGRHPKAALISSCGFAEIENFDLLRQHFRLICENSEHTDWSWSGEILVSEAGAAAAPK  
LFD RKYNLIEKAGAELEGMISQKTTNAIAAPVMPAEDYRRMVTLNFEGGVIAKAKVSLI  
AIKAMRDKKKIRE\*

>SPBDM4\_v1\_80007|ID:27159783|pepF| Oligoendopeptidase F homolog [Uncultured spirochete bdmA 4]

MTKTIPERSEISGEHKWNLSSLFKDDAEWERNFAILGAMLPEAEKKKTDFASASADAFD  
TLRAYEQYLILEERLGYAQLRAAEDEGNSTARGLFARFVGVSSQGQAAWSWLSPTIQAL  
GDDFVAGCLASQTFADYRVFLTKLRRFKPHVLSEAEERLLALQTESAQTAQEAFSVLTNV  
DLNFGTVETPEGPKPLTQSTFISFMRMQDRSVRKAAYLQFYSHFEAHQNTLGALYAGSVK  
LDKYQAQVRKYPSARTMALFPDNVAEAAVDNLSTVNNENLPILHRYYGLRKEILGLEGLR  
HYDVYVPLVKEVKASHGYEEAVDIVIEALKPLGEDYVRTLRNGLLGGWVDRYENKGGKRS  
AFSAGSFIGEPYILMNYKDDVLDLFTIAHEGGHSMHSWHSARNNPFMCYNYTIFEAEVA  
STFNEQLVFSYLVDHSSDDREKAFLVATRIDDTLATLFRQTMFAEFKRAHEIAESGEAL  
TVDVLRKEYRALLEKYFGPEMAFENVSDMEGLRIPHFNAYFYVYKYATGLSASIALSEKV  
LHGGMAERDAYLDFLKSGGSRFPIESLKLAVDMSTPEPVEAACRRFAGDVEQLAALLQK  
K\*

>SPBDM4\_v1\_80008|ID:27159784| Transcriptional regulator, LacI family [Uncultured spirochete bdmA 4]  
VGDGDYYLRQVTKRFDPEMSFVYNSSAMSKITIKDIALRAGVSKTTVSFALNYPDRISKE  
TYKRIMAVEELGYVPNPFARTLTTKRLGAIGLLLPQKIGDIFGNPHLAQVISGIGEECE  
QKEFSLAILPLIRGKIIAARKSYVDGLLTIGVGPDHEVVSLLRKNHIPFVTIDGEEAS  
TINIGIDHKSAAAREIMRHVLEQGFQRIAILSLEPDTKPSSESGHFSIVIQRLEGFQWALE  
ESGLSLDDSRVYMQNCKGSIDGGYESARYLLSLERRPTAIVAMSDIAAIGALLAAKELGL  
RVPEDVAVAGFDDIPESVISAPTLTTHQPAREKGI EAARMVMHMLDGAAGNHIRLPYEL  
VVRESTRRT\*

>SPBDM4\_v1\_80009|ID:27159785| AAA ATPase [Uncultured spirochete bdmA 4]  
MTSLPPAAIRLYYIFTMDTLTVNIDGLNDISVPAGLSAQDIFERAGLTKGSSEGTAAP  
LAVFVNNELAALSAPINANCSLSPVYDPSMGAEVYRRSLCFLAMAAREIVPKRRLMVS  
MAINGNGYYHYFDDSEPISPOLLEALSARMRNYIASDLPIRIIMHSWINDALEYFDQSNQAD  
TVALMEYINDPFVQLNECDGYRDLHIAPLVPCTGLLSVWELIPYRRGMLLRFPHTKNPYE  
MDPFS DIPVLYEIAEEYEQKAKVLNAGSIGALNRINQSRNIQDFVLVAEALQNKKLAIA  
DQIAETSDKTKVILIAGPSSSGKTTS AKKLSVQLRALGFKPIHIELDNYFVDRSRTPLDK  
DGKPDYECLEALDVEFLNQQLDLDFDGKEVELPNLDFKSGTRKASGNVISLKNNEILILE  
GIHGLNERLTPHIPAENKLIYVSALTQLNVDDHNRVRTTDYRLLRRMVRDYNFRGHDAR  
ATLGMWSSVQRGERLYIFPFQGSANIAFNALSALDYELGVKVF AEPLLRAVKPHHPEYPDA  
RRIQAFISRISPSPQYVPSDSILREFIGSSVFKY\*

>SPBDM4\_v1\_80010|ID:27159786| Bacterial extracellular solute-binding protein, family 5 [Uncultured spirochete bdmA 4]

VLAALSVSALGAAPQNSQDYVYVFSTDPRSFNLYLNDQRATNIQHIANFVDALLEH DRYGI  
LRPALAESWKVND DFTVWTFDIRQGTKWVTADLETYA EVKAQDWVDAMKYMLDNRSPLTC  
LVDGFVRNAGAYLQGKITDFSQVGVKVKGDYVLEYTLERPIPYFD TILTSNAYYPVNGDF  
LRSKGVDFGRVDRNAILYNGAYVLSNYASRSVIEYDANPTYWDKDHVYIKHVKYVYSDGK  
SPDSLFDNF DAGDYVAAPVYTDNEALFARAQAKYKDYIFRARQDSTTFVYAFNYDRRAYA  
SPADPAKGGSPKSDQAKEDTRKAILNRDFRKAIFFGIDRPTILAQ RNGDVNKLAAIRNSY  
TAPELSFDKAGKDYVKYVEDALKSRNPADFPASF KIDDAQDPYYNPTLAKTYMAKAKAEL  
AEQGATFPVELDVAADISYAKGMRMSQSFKAGLEGLFGTDTIKVNIVEMDTDNYDASTCY  
ARIGAQS NYDIDNSMGWSPEYGD PYTFLQTLEPIVGALLTPIGLDPVDEGSDKASATAIG  
LYDYAHKVEAGNDEYKDSSERFKLF GDAEAQLLDDAVILPYMSFGGAFQVSRVIPYTAPR  
AA YGADEYKFKGVIVSDKVISLAEREKYRQDWEKQRQA EYKKLQKQ\*

>SPBDM4\_v1\_80011|ID:27159787| putative amidohydrolase [Uncultured spirochete bdmA 4]  
MKIALVQFEPVFGNSDRNVERLIRLCRQNPADLYVLP ELAYTG YQFVSIETRS LADDLA  
SPRIHAFRAAARDLDAIVFGFPEVSGGSIYNASLAVLPDGRDYL YRKTHLFYKETLYFS  
PGDTGFFVFEFRGARIGMAICFDWFFPESFRTLALKGADIIAHCSNLVMPYCQKADFAAA  
VQNRIFIATVNRVGSEQREEEALTFTGESVLISPRGEYVLRGPVDGEAVLVADINPEDAR  
NKS VNRYNDVLAMRRPGMYSL\*

>SPBDM4\_v1\_80012|ID:27159788| NAD-dependent malic enzyme [Uncultured spirochete bdmA 4]  
MNLSSLNDLSEVPDDLADQRRARAQTIFL KTLSEKAHRFYGGKIQVVPKAGLYGFNWF  
NVWYTPGVSKISTTIRENNDQSFALSNRGNLVA VVSDSTRVLGDGDCTPPGGLGVMEGKA  
FLMKYLGGVDAIALCIDSRGKDGKPDPEKIIDFVKMLEPSVGAVNLEDISQPNCFKVLDD  
LRDACDVPVWHDDAQGTACVTLAGLLNALELAGKKLSEAKIVLLGAGASNTTIARLILAD



GGKGENLIVFDSKGGHLRNRKDIEQDKRYRKYRKLWELCVQTNPQCIETEAEALKGADVLIAL  
STPGPDTVKREWVRAMAPKSIVFACANPVPEIWPYAAKEEGAYIVATGRGDFPNQVNSI  
CFPGLLKGALLVRARKITDNMAIRCAHSIAGFAKSRGVSADNIIATMEETEVEFAREAADV  
AVAAIEEGVARVTDWTWENIYAKAKEDILASRALTQDLMGQGHIAPIPERMLQESLDFAVA  
EVRKQ\*

>SPBDM4\_v1\_80013|ID:27159789| putative dihydropyrimidine dehydrogenase [NADP+], similar to dihydroorotate dehydrogenase [Uncultured spirochete bdmA 4]

MADLGTLYMLGLHLRNPVIGASGLTNLPDGVKAAHSGAGAIVLKSLFEEQILAVLGQEM  
AGLDIDSYPDAAFISRTAWEESTDEYLKLIDESKKRVDDVPLIASINCVGPGNWAGFAK  
RIEEAGADALELNIAVVPFSPHISGHEIEQKVFSTVKEARLATKLPIMVKLGNNYSSLPH  
LVHGLSKEGANAVVLFNRFFRDFNLNTMRLTGVQPLSSETEYHESLRWTAILYKRAGLE  
IVSTTGIHNADAAVKCLLAGANAVELCSIIYQKGWKAIGSILEEMDSLVESLGYSSLDL  
QGRLSAINAEKPEEYLRQLQYIKALTGMY\*

>SPBDM4\_v1\_80014|ID:27159790|thrS| Threonine--tRNA ligase [Uncultured spirochete bdmA 4]

MAADIERMRHSFAHVMAEAVQHL YGGVKFGIGPAIEDGFYDFLFPKPVTDLRTIEKE  
MRRIMAQNQSFVREEVSREQAREIFRDQPFKLELIEGLEEGTISIYKQGDFVDLCRGPV  
DSTKELKADAFKLTIAAGYWRGDEKRPMLTRIYAYAFASKADLEAYLHMLEEAERRDHR  
KLGKELDLFSTHEEAGPLIYWHPKGGRVRVELEKWWREEHYKNGYEILFTPHIGKSWLW  
ETSGHLGFYKANMYAPMTIDEDDYIKPMNCPFHMMIYKTSSHSYRDLPLRWAE LGTVYR  
YERSGVLHGLMRVRGFTQDDAHICTPEQIEDEILEVLRFSLSMWKTLGFKEIKAYLATR  
PADSVGEPERWDQALVSLRKAIDKEGLPYEIDEGGGAFYGPKIDLVKDAIGREWQMTTI  
QFDNFNEPERFDMTYVDKDGKQKRPYMVHRALLGSIERFFGVFIEHYAGAFPAWLMPDQVA  
VIPVAPTFDEYAKEVTANLRGKGIRAKAMLSEERMNAKIRDAQNQKIPYMVILGQREQDE  
RTVSLRLRTGGQENGIALDAFTARALEKIETKALDL\*

>SPBDM4\_v1\_80015|ID:27159791|clpS| ATP-dependent Clp protease adapter protein ClpS [Uncultured spirochete bdmA 4]

MGTKLTETTDQELTREDVEAKEPEEYRVYLINDDFTTMEFVVSILMTVFHKSLPEATKL  
TVEVHRKGRGMAGTYSYDIAITKIQQVHAMARQGRGFPLRCTMERA\*

>SPBDM4\_v1\_80016|ID:27159792|clpA| ATPase and specificity subunit of ClpA-ClpP ATP-dependent serine protease, chaperone activity [Uncultured spirochete bdmA 4]

MKVSPEVQAIFFNAAYNEAKLRSHEYLMPEHILFAGLSFEKVRNIFENC DADLEQMKRSIE  
AYFEQKMPIVRNAEPIQSAGFQAVIERAVMQSQSAGKEEVQIPDLVVS LYDEERTYAGYL  
MRKLGIKRLQLLEVL SHGISDEDFGADAFPEEETEERTEEGGKERRAARPGTLERFATDL  
TAMATAGKLEPVIGREAEIERTIQVLSRRLKNNPIHVGDAGVGKTAITEGLAQRIAAGDV  
PPKLGKTYIWSLDMGALLAGTKFRGDFEERVKKVIDSLLKKEKAILFIDEIHTIIGAGAV  
TGSTLDASNLLKPALTSGLKRCIGSTTYDEYNKIFEKDRALSRRFQKIDIIPTIPETVE  
ILKGLRSKYEEYHDVRYSDETLDIAAKLAAQFITERKLPDKAIDVIDEAGALARIRAYKV  
NQEAEQMOTIDITPHDIEVVIKARIPERTVTSSEKDKLATLEASLKQEVFGQDRAIEAV  
VKAVKRSRAGFRAPDKPIANFLVVGPTGVGKTELARQLSKHLGVPLHRFDMSEYQEKHTV  
SRLIGSPPGYVGYEEGGLLTD AIRKTPNAVLLDEIEKAHPDIYNILLQIMDYATLTDNQ  
GRKADFRNVILIMTSNAGARDIGKPLIGFGDQVVSASALDEAVERAFSPEFRNRLDAVVH  
FNNLPMEVIERIVKKAIDFGAQLAEKNVTLKAEDQVIRFLAERGYSREFGARNIARLVE  
DQIKTVFVDEVLFGRLEHGGTALARLENDKIVFDITPRDA\*

>SPBDM4\_v1\_80017|ID:27159793|aat| Leucyl/phenylalanyl-tRNA--protein transferase [Uncultured spirochete bdmA 4]

MRWLTMPPEYLDETGEYRFPATSATQSGIVGYGGNLSPGALLSAYRQGIFPWPSTPALLR  
WCSPNPRFIISQGS LYTESARKSLKKALRRGAPYTLTDKAFSDVINNCATVPRPGQPG  
TWIFPNLIQGYTELHRLGYAHSVEVWKNKVLVGGLYGVSIGAAFFGESMFSLESNASKIG  
FLSLAATLFFERGFVDCQVYTPYLALMGGLEVPRPLYLSTLNHALAAPTLLKGNWSGVFP  
DFPDTELVISFRKNSETITYHT\*

>SPBDM4\_v1\_80018|ID:27159794| protein of unknown function [Uncultured spirochete bdmA 4]

MKLLFVQLPSQMPDWSSAPANIPLAAGYLAESAESKGLLARREW TILEPEIANFGSDSSI  
IASITAREPDIVAF TLYSWNLSLRFVAERLASLLPRARLIAGGPEVVEHMPVTVRTPFH  
SLVYGEGEDAFAEVLQDIQEHRPLSSSYSSKDLIDL SKMPNPYLTGALRFDPNFQVHLET

MRGCSEKCSYCYGKKNYKTIRRFPHQQTVDVIRTASEAGVSEIYIMDPNFQSGPDFAGRL  
RDIA YANHAHTAIHTELRL EGINEELAGLLKEAGVASVEVGLQSTNPKALEAVHRTFDKK  
AFERGAELLQKQKIMIKTGLILGLPYDGYEQVIETFDLGMQGLGQEAELYPLSLLPGTE  
IRERADEYGISAMEIPPYLVTSTHWSYDDTVDAIATFEESFDVEWAMPPAPHFQLFKEG  
FVSFIDTRKPENIDWMRLNPEKLSSTITLLVDADDPEILARIVRAARDLRKDNPYSLYQI  
VLTSETRIPSEKLVERIRDAFLNPEHYEYELANSFSPDPQTSYHTRMFFATKNFTLAYRAL  
EEAQDMETMVVLNGREGYNADRLAELLPYVIFDKQALPFDRLYELISYADFPHMLIEAP  
DGLL\*

>SPBDM4\_v1\_80019|ID:27159795| D-isomer specific 2-hydroxyacid dehydrogenase NAD-binding protein [Uncultured spirochete bdmA 4]

MNIGSFMPHSAWGPVVAQLREEFADHTWLEGLTPESPQISSLDLIAGRIPSSVITEAV  
ALKALFQPF TGVNHLPAEMMVARGVEVYNVHSNAFDVAERALAMTLAFYGRHIEFHNDLK  
NEVWHGFWVSRGAEDNWD SIYGR TCAILGTGAIGQELAKLLKAFNCRVYGWRRSKGAEVP  
EHFDAVLPTLQEA VNMAEIVFIALPATRETEGLLSRELLMTMKGKFLVNVGRGSIVDEEG  
LYEALKTGVLKGA AIDTWYTYPKTG VIGAPSRYPHRLPNVILSPHVGGSTNQATRKSVE  
DTRQNIRAYLRTGHGIWRADLRKMY\*

>SPBDM4\_v1\_80020|ID:27159796| putative Ankyrin repeat protein [Uncultured spirochete bdmA 4]

MQKPKLTKARFLGLIILVFLLGSCATSPASNKEVTLSDLVIKGDIEGIRKFYSNQEQLN  
KADNQGLYPLHYAVMKGDVQIAEILIVLGAKPDNKDLSGKTPLRYAVDRKQADMVKMLVD  
RGADPFISDVGGTSPAQVALHSDMGILDAMFNSKNINNTGPDGRTILHYAADALMPKEVD  
LLLSK GASVQIKDKADRTALDLVLLYPDKLEAAQIAEKLILKGANPSFPEFSWFAVTVRA  
PDYNAVRFANGNTPLHEAISRYQSGFALFLLLNKIDPDLKNLNGEAPHLAVKAGYVEGA  
QLLLQNSANPDILDANQNTPLHLTIPPARRLEMVKLLLSYKANPALMDNQGNTPLHKAVM  
QFYAPEIVDTLIQAGAPVNAQNANGDTPLILCARTEHYEYAKSLIEAKADIFKMNQAGEN  
ALRIALSKGYKAVDNIVLPSNVNQSDDNSNSVLMTAVSLKAPADV LKLILSKGADPNARN  
KAQDSALHLAVRQNF AEQIVLLDAKADIFQYNARQENPLFLALTAKPAPLEWFFRPNVI  
AARDANGDSVVHHAARKNLPDGIAYLIKKGASLNVLNNAE TPLHTAAKYDATDAIQYL V  
SAGSSLKAADIKGDIPLQSAVLAGAAKATELLISSGSPVNNQNYSGETALHQSGKNNNA  
IVRLLTANGAQTEIQDSRGFTPLAAAAAYGAYDAAADLLKANALIDTRDNSGSTPLYQAV  
SGEHIAIIRLLL VNNADMHALNARGLSPFRLALTKNSQIAAEFYTGRLINKPDSNGDCVL  
HILVSNQMSQELFAEALKNGANPNARNAKGDTPMLLALRRNDLNAAVILIKAGSSLFVSN  
ADNISPLSVIFTMEPGARNKLF AAAGVNNSDFTGETLLHYAVRANNKDAVADLISLGADR  
GAQNRKGETPLDLAQAKGYQEIASLLANK\*

>SPBDM4\_v1\_80021|ID:27159797| RNA polymerase sigma factor [Uncultured spirochete bdmA 4]

MSDQVDCDAEGNSKRPTRRDAGEEPMSEL DPLSLYLRQISKYPLLNAEQEKDLGARLDEL  
GASVQNSDIELAKNPHDDILAQNRKRVADEL RITRELLITSNLRLVVSIAKGYQMRGVNL  
LDLIDEGNIGLIEAVNRFDYRRGYRFSTYASWWIRQAIKCLVDQSRIVRLPIHMLNTIR  
RCYASAKELVQELGRDPNAEIAEKSGISQNKVASAMQFAQGTSSLDLNLDEEKNGLAD  
SIKDEKTPDPFSQAFTATMQELIRYVMYLSEREQIVLQLRYGLNGEGPKTLEETGRALG  
ITRERVRQIQEQALEKIKQRQELSDYTV\*

>SPBDM4\_v1\_80022|ID:27159798| putative LysM domain/M23/M37 peptidase domain protein [Uncultured spirochete bdmA 4]

MPINKAGQYMARRV FVTSILLSL SMPLTLCGAEQEYHVIQTGETLYSIAKSYSIPYEM  
LANINGITDPSKIRPGIVLLIPQAHIVAKGETYYYGIAKKYDISIQELKSANDLSDSYILR  
VGDV LVIPEKGS GASQVAQLNPPSNTTASPQPSSVASANSVPPAASAAAGAKGSSAAGA Q  
TANAAPSAPAPTTVPAPSAPAPAATPSSTPPTSPASVSSSAPNAKAEASAPRATDALLSW  
PVDGKGQYMSGKLEGIMFQTNRGASVKAVASGMVVSAGPSRGFGEVVF IQSKSGFVYVYG  
GNESILVKTGENIEPGKTIKAVGLDTKEGSPIAYFFVFRNGQPVDPSLAPRE\*

>SPBDM4\_v1\_80023|ID:27159799| Diphosphate/fructose-6-phosphate 1-phosphotransferase [Uncultured spirochete bdmA 4]

MLEQSSLHTARYAYVPKVPEIFLEPVLNIKALPTETVEPEKDREALKRTFPNSYGKPAVK  
FIKGE GALEEKAFTVGVILSGGPAAGGHNVIAGLFDALKKANSQSRL LGFKGGPSGLIDG  
KYIELTSEIVDQYRNTGGFDIIGSGR TKIETPEQLEKSFENVRQLNLDALVVIGGDDSNT  
NAALLSEYFIQKGAPLTVVGVPKTIDGDLKNEWIETSFGFDTAIKVYSELIGNICRDAAS

GRKYWHFIKLMGRSASHIALECAFQTRPNIALISEEVEARHMSLSQIVEIIADAIAARAA  
KGENFGVIIIPEGLIEFIPEIKVLIAQINDIIASAGTEYESLSKGETQRAFILSRLPAES  
AQLFSNLPESIQTQLCWRDRDPHGNVQVSRIETEKLLVEMTSRKLQEMAASGVYKGFYDQ  
THFFGYEGRCAFPSNFDADYCYSLGYDACLLILHRLTGYYAAIRNLSGHPKDWLPGGIPI  
VSMMNIEHRHGKEKPKVIKKALVDLEGKPKFAFSAVRDKWALSDDYRIPGSIQYFGPPAIT  
DAPSIILQLEQHS\*

>SPBDM4\_v1\_80024|ID:27159800| Outer membrane lipoprotein carrier protein LolA [Uncultured spirochete bdmA 4]  
VKRTKFAIIAWLVVGFASVAGAGAQTLLTADQFFARLADKYSTVSDYQADVQITAGHQPM  
TGSLIFKSPTLLRIDFSQPADQVIVFDGKTLLVYLPQYRAVLRQDAGDQGVSLGSATLAS  
KEGLSLLRRNYTIGWEHSPNQEPLDPSNEQVYRLMLSRKSVSEGYKNIRLSVSADTMLI  
RRLEGWTVSNDKIGFDFQNIRLNQGINEDKFGYDAPASANVYNNFLFQ\*

>SPBDM4\_v1\_80025|ID:27159801| protein of unknown function [Uncultured spirochete bdmA 4]  
MGKVGSIFRDARLGKGLTLDQVSDETNISKRFLOQIEADNFEGFPGEVYILGFLRNYAEF  
LGLDALQIVARYRLNEVPQESGQAESPSPSAEARTPDPEKVQATEPQKPPSSPLTEASE  
KNHVAQAQDLAPAPSPKAAEEESTTQTPSLFSEAEAEENLLSSSSEKKKTAATKKKRRAK  
PDAQEKRGKDETTPHALGLKEEASSSGQAPQPQSLSKPEPVKPLKSENTHIQAGRILPFV  
LVGIVLIIAAISIIPKLNLPAGTSRTPAEYHAEGLPFEQRLYPQDKVYLPGLGDDFISITL  
RSIKDKVTFDTPYGALTAGLNEEAVINPSADNERLIATVMDYAPNASQNGALVHFDAKEA  
LSQSESPGDILVPAGSGSASGSQGSQSPAIQPSLQQAEPVLFRRSSGGPHPFYVNISFM  
SPVLFVRYEADRKEWVEKYRKGESVTVNAANSITFWTANAQAVKVSVFQSAGKSTELVMG  
GPGEIAVQRLSWSNAQGGWAMVAAPLD\*

>SPBDM4\_v1\_80026|ID:27159802|rimO| Ribosomal protein S12 methylthiotransferase RimO [Uncultured spirochete bdmA 4]

MPTFYIDQHGCACKNQVDGEEISARLIDAGFSVVEPENADVIIINTCGFIEDAKKESISA  
IVDTKKRWPGKKVIAAGCLSQRYPEVLFSMDPEADGVFGNGDLSLIPGAVEKVVHGTREL  
LKTPQQRNMPLVCYPRKAFFDYPGTAHIKITEGCSNHCGYCAIPLIRGELRSRDIADIVS  
EAQGLLDRGVFEIVLIGQDLGNYGKDLEGRCLPDLLSAFAEIKENFRVRVLYIHPDHFP  
HEILPIIKGDSRFAPYFDLPFHASASVLRSMNRQGSTEIYLGLIERIRAELEPFAMIRST  
FLVGFPGETEADFSALLDFQRAAQLDWLGAFAYSREENTPAYDMKNRVPKSVQAQRKALV  
EETQVAITAERLKRFIGMSDHFIVEEAFDHDKLCIGRGWMQAPEVDGVTLIHAAQKPGAI  
VEAHIISVNGVDFNAVLEYTATV\*

>SPBDM4\_v1\_80027|ID:27159803| conserved protein of unknown function [Uncultured spirochete bdmA 4]

MISGQIPEYLQGLNPEQLEAVRDEGTRLLILAGAGTGKTRVITTKIAYLVREKHILPESI  
LAVTFTNKAANEMRERAMDIEPSCERAIIRTFHSFGAWFMRRNVQAFDLKREFTIYDDDD  
SAELVHSIFPTFSKRDCGDYAFLIAKAKDYGLSPDAPNLGFISQHPEFRRIYAA YEERLR  
ATGNVDFGDLILMPAQLLEKDEAIRNRTQQRFRVILVDEYQDSNIAQFRLQLLASPEAM  
LCVVGDDDDQSIYRFRGAEVNRLGFQTIFFPGTKLIKLERNYRSHQSILDLAHSIVAHNAS  
RLGKKLLATRSGGTKPKLAILDDQDQEIEYCAIARQHLQHGGHWRDIAILYRTNAQSLG  
FERLFPHYDIPYRIVGALRFYEREIEIKDMLAFLAFLANPRDEVSFKRIVNKPARGIGTTS  
IEKIVASALQDDSDLLEASHKVIQEVHVGKGDGLRQFISLIGDAKTSLDKGVNDEGNLGM  
LGSLVADFAKNSGLIDFYRGKDKISGTQKEENIEELVNAASDSPLSEDGLLEFLDVTMLD  
QSQRNDANADAVTLITMHNTKGLEFPVVIVTGLEQGLFPRNDEEGDDIEEQRRLFYVAV  
TRAKEQLYLTACRWRRHLHGRLEFETVPSRFLTEIDSELYDLWGASGRPAQAAYTHRTPGRE  
HYDTTTKAEWAPGMTVYHDEYGNVTVIKVTSPQSAGALVIVKFESGKVAQFFPKYTKKLE  
KVEH\*

>SPBDM4\_v1\_80028|ID:27159804| conserved membrane protein of unknown function [Uncultured spirochete bdmA 4]

MNRHRSGSSQLGFFVALVSGISFSTLGIFAEMLYAEGFSVASALAWRFVVASLFLWAVVY  
VRMYFRKRFLHRAQDIQGTEDHVAVRKRFFRVFLLGLIGFSPQAGLFFLTVKILDPGIT  
SLFLYLPSFVFLIGFLLKHQKPGRVQSFALLSLVGCILTFWKAGSYPTVGLVLGVVVA  
IAYAVYLVAGESVLQNVDSLWATAVIMTAAALVYLCILIGGGTFIVPVSLKQILLVVCIA  
LFATVMPIVTLFMAMQRIGARDTSIISTVEPVFTNILSMIFFGELMTGRRILGGSLILAG  
VIILNRWGYPSRRKAEVAS\*

>SPBDM4\_v1\_80029|ID:27159805| conserved membrane protein of unknown function [Uncultured spirochete bdmA 4]

4]

MSEPKILDYKNNEVRERLLRALNGATKDWTDADLARATGLPLAQINAEMPAISDEYRGRLL  
KVSEKGDLLYSFPQGLKSRYRGFPGFMRKLWRTVSRGAVATGKVLKVVILVTFFGYFFL  
FIALALVALFGSVALQGGGSRDRGDRRGGGGLGGLWLTTSLFDSMIRLWFYSELFKSSDA  
RYRDSYARRERHPLNKA VFSHVFGDGNADWNTVLKKA FVAFIQTHKGVITLPEFMAIS  
GLKPEEAQDRITRFLVEFEGSPEVSENGALYFFFPSSLVKASDVS VPAASAFPLKKLKRF  
SSNDGKMDRTFRWVNIVNLLFGSYLLNAINVGTNVIIQTAEGVALKGGTYLYSYTVYL  
ASQLGATQPAVLLGWVLGVAPLAFSVLFFGIPLVRSWRLKRENEMLKRENMRKVLYSAVI  
ANPRGFDHRTVSLPSEEVRPSAPEAVQEEVRHLAAWSSGEISAEGIWAFKDLFIQREAE  
QVRASIRETDYAPQKT VFDTDEKV\*

>SPBDM4\_v1\_80030|ID:27159806|glgA| Glycogen synthase [Uncultured spirochete bdmA 4]  
VKILFISSEVTPFAKSGGLGDAVSSLATALS KLGHEVRILLPRYYFISKKTLRRINGILE  
IDSARERHHAFLYTTTTPNSQVKVYFLDCEPLYGRNGIYGYTSTQEFPDNPERFSVLCKA  
AFAACRSVGVWIPDIMHANDWPAALIPVYLNTKEKNTEFSSTAGVFAIHNLYGQGIYSRDH  
FPDLGLGWEYFYGAGFEYYGNINFLKSGIVSAECITTVSPTYAREIQTPNGGFGLDGLLR  
QRSRDLVGILNGIDTDVWNTKTDPYLPAHYSSTDLSGKAACKSTLQREFGLPIDPGVPLI  
GMVTRLVEQKGISEVFGRTYGCMRKILETIHVQVAVLGSGDAWAEAIMNYS AQYPQFKG  
VIGYNERLAHLIEGGSDFFLMPSRYEPCGLNQMYSLVYGTLPVHRTGGLADTVVNYNQD  
LGEGTGFMFDDLTPQAVYDVGWAMWAWYNRPQH IQNMRTRAMEQDFSWARS AEEYVRLY  
QHAVSLREAR\*

>SPBDM4\_v1\_80031|ID:27159807| exported protein of unknown function [Uncultured spirochete bdmA 4]  
MADHIKILPSLILILIAALLACPIGTPQGMGNVRIQCIVPGDLTGPGA KSAAQGLVGPQ  
SGWKIASYRLTFTADNGEVITRTLNRGTGEVALKVGGWACCAEGLSADGSVIVEKQVHVV  
AEAGKTINLPISLHLANGKGTLRIVFSPSQTPTGTGWKYSVSLVYKGLPGDPSFQGPDDFS  
TEVSATEASLVADLESGYYVLA VQLKDDSSATIAGTTATALILPKQISAGECGISLSDP  
SINISVVAPDLELSANAAIAVDRYLNRNRPMIVPLALGPDEAELNVDWYVNGEKIENPQN  
EMGQSLPGFRILLGSNEVPNMQTTIKMDALLTETTSGLSQTFPHTSYLALGPTTGWA EWV  
QSIDYRAAMGSSVFNASDASNTGTGIQADAKWVATNPAGLIAVAGLDKTSALHLFYSPLG  
KEATQGNQSVFTIPSSGTWLRLWRDKIVVEKNERSPDRVSISPDGSLIAIGSSTS NWLRV  
YALDGAGEILSKKDIVSTKNGAPAFASKAMNFSADSKRLFILTN SPEKILVFENTERLAL  
GEACSENEFSFESCFVPPSSSLGMEDMVLLPDGWIAACSSNIARIFFVRYSEAECQFSS  
AGLFASGANGESLGDPKAIAFDEEDGLCYILGYSKKLHVFSKPD TSSGYGPLTTLSLPNE  
FDKARSLVFLKNHSDAKFLIAGGGASLGIIALDSLQPLVLSL DSTPDDYAAISSISNI  
ASLGSSIVAAGGTSGLVAMLDIL\*

>SPBDM4\_v1\_80032|ID:27159808|gcvPB| putative glycine dehydrogenase (decarboxylating) subunit 2 [Uncultured spirochete bdmA 4]

MNTMNMNRDEPLVYELSRAGRKGC SLPKPDVPEYAVPEDLAREGLDLPELDELTVVRHFTR  
LSQKNFSIDTEFYPLG SCTMKYNPKVNEVAASNPGWKNLHPLVGDENAQGALELMWRLQE  
GLREVGGFAAVSLQPAAGAHGELSGVLMIRAALRERGAHARKKMLIPDSAHGTNPASCTM  
AGFETQTIPSGPDGNIDMAALRAALDET VAGIMITNPNTLGLFERNIEEICRLVHEAGGY  
VYGDGANMNALTGIFKPGNSGIDVMHFNLHKTFSTPHGGGGPGAGMVAANKTLAPYLPGP  
VAVKNGDGYTLEMPPKSIGRVKAFHGNFGVLVRAYSYLLMTGANGLRRVAENAVLNANYL  
KSLVEDVYPVYKRN CMHEFVAKGTIADGVHTLDIAKRLIDYGFHPPTIYFPLIVQEALM  
IEPTETDSKETLDLYADALKKIAMEAVAQPELLHDAPHNAPVARLDEVMAARRPILCYRG  
\*

>SPBDM4\_v1\_80033|ID:27159809|gcvPA| putative glycine dehydrogenase (decarboxylating) subunit 1 [Uncultured spirochete bdmA 4]

VPFVPNTDAERAEMLKA VGASSVEELFSDIPELLRIKGLDLS DGVSEIEALNEIDSLAER  
NVQTKKMDWFLGAGAYYGYPVVPALAGRGEFLTAYTPYQPEVSQGT LQAIFFEYQSMMA  
KLLGMPVNVNASHYDGATALAEAVLMAWKAKENRNRILLPVDLHPEYSQVIATYCTSFNIE  
FVQYEGAPESAPVDEDTAAIVIA YPSFSGEVYPIKRAVDRAHEMGALCIVHADPLMCAIM  
KSPGEQGADIVAAEQSLGNPLNFGG PYPYLGIMGTTEALVRRMPGRIVGETKDKV GKRGFV  
LTLSTREQHIRREKAVSNICSNQGLTMLQTCIYLATLGKQGLREVAKQSYDKAHYAAGLI  
GGTAGYHVRSSQFFREFLVETPKPAARIVKTL SRRGIMPGLALSRYYPDRPNELLICVTE

MNTRAQIERLAVALKEASK\*

>SPBDM4\_v1\_80034|ID:27159810|gcvH| glycine cleavage complex lipoylprotein [Uncultured spirochete bdmA 4]  
MAIDKNARYLESHEYAKPSGEHMIFGISDHAQTELGDVVFVELPAVGKTLKSGAMFGTIE  
SVKAASDLYAPVSGTVVEVNEAVKNDPSLVNKDCYGAGWLIKVAPSNASEFDGLLDPAAY  
GKAIGEE\*

>SPBDM4\_v1\_80035|ID:27159811|gcvT| Aminomethyltransferase [Uncultured spirochete bdmA 4]  
MEEPTNITALHDWHVSHGAKMAAFAGYDMPINYSTGAVGEHHLTRRSVGLFDIDHMGQIE  
ITGQGADDFVARMITAKVSDLIPPMARYSLLLDEKGGVIDDLFVYRLPDSWWIVVNASNR  
AADLEWFKTHAPSGVKVTDSDDTYMIADVQGPRAIELIDKVADSPVSSIQRFCWGNI  
GIPTLFGRTGYTGEDGGELFFPAEKALRLWEFLLRGEALGIETKPIGLAARDSLRFEAG  
MPLHGHEISIEINPIEAGFKWACDFEKEFVGKEALLAIIIEGVSRKLVGIEVFGGVPREG  
YEVCSPDGGSIGHCVAGMFCPTVKKYAANAFVAPDFAKAGTNVSVIIRGQPRAAVVIKRP  
LYIPAYRR\*

>SPBDM4\_v1\_80036|ID:27159812| putative Lipoprotein LpqB, GerMN domain protein [Uncultured spirochete bdmA 4]

MAARRKKRTSSKTGCLLWIAAFILLLILFLVKFGDIRTAVQKTGFLDALNHAVSKPNSPT  
PAPEQPHSPTIQTTEPQQPEESPGSSAAPSSGQTPNTPSTSSPAQAPQNIPSSPPESV  
PTPAVPAQQEKKTRSAVLYFVQTHDDGSISSQRVKRTIPISDSPIQDTLEILIKGPTESE  
LRENLLSLIPSGTKLRGVSVRGSTAIVDFNEAFVYNRYGKEGYMAQIRQIVYTLTEFQNI  
TDVQFLIEGKPR AFLTEGIALDKPWARASF\*

>SPBDM4\_v1\_80037|ID:27159813| protein of unknown function [Uncultured spirochete bdmA 4]  
VQIHNPYFWQVVFIDREPEKAVFFTVAPNKEQPEYASLVLDPFARQK\*

>SPBDM4\_v1\_80038|ID:27159814| protein of unknown function [Uncultured spirochete bdmA 4]

MTVGELQEQIFPSAEGLERALKAAALRASQTISPALRPRAPGIASPGGLVQLSHQKPCILV  
PDLHARPAFIDALLRTEFPDLGEPLHSALEDDRVSLLFLGDILHAEGEEAARRWISAYKR  
LAAARDDHAILSPEMDEEMGLSLEALLKVIDLVCRFPNSVFCLKGNHDNVMNAADHGDFF  
FYKYADEGRMGALWFQLRYGPDIAQLVRRYELSLPVA AVGENYCASHAEPALPLSRSAII  
AYFEHPEVVQALIWTANAEAKEGSVA\*

>SPBDM4\_v1\_80039|ID:27159815| Tetratricopeptide TPR\_2 repeat-containing protein [Uncultured spirochete bdmA 4]

MIEKSRRVPGMKPLSRAKSHVASAQKKSRIEDADGQPLSEAFEARKKLALSSIVYIRFEG  
PDALARVPEGIDPSIPYVQLQSPVIKLNPAITIESLLTGMVRVLAWEPNNSNAETYRA  
YVKA VRPELFEELIAAGIQKAESKEWTVAEELFFAASGLDPERPEPSINLALMHEEHAKY  
LSDSGNEEDA EKEDDLAHKYYQYLLALKETFPAYYHAAFFFLRKHNYDKAVALLTSYIG  
MSDDEERTKRAKSILEKLSSMGYLDTLFKEAYDFIQMGEEQKGLERALQFVDKYPDVWNG  
WFLVGWANRRMGKWAEGERAFHAALEKGAEGADVYNEL SICEMELGKLDAAKSGLEKALR  
IEPENVKIIVNLGALAYRQGRIKEAEGFF\*

>SPBDM4\_v1\_80040|ID:27159816| conserved membrane protein of unknown function [Uncultured spirochete bdmA 4]

MIGFLIKKSFDDGWDNLYLLAALNGVFLLVLLLFVVLPAALGAPTWLIIVLVAIAIVGLS  
IWDAAVTDAMYSLADAKSVHFSDIKAALSRLKGLIMGGLNLMIVVAVAVALPFYLGQK  
AMWGVFAGGVLFWTMLLAMLILQYVPAIFARDGGTTPRQAFRTALYLFADNPGFSIFLLVW  
RVLTFAISILTMLLAPGPAGTSLASAVAVRLRMKKYRYLKENPEANHRQIPWDDLLEEK  
ELVGKRTLKGMIFPWKD\*

>SPBDM4\_v1\_80041|ID:27159817| Ornithine decarboxylase [Uncultured spirochete bdmA 4]  
MHKVCNWSSSELSPCQEACTVKTAYSFPLENFM SREKFERIKEFAKDKETPCLIIDLEVI  
RKNYENLQTYLPWSIIYYAVKANPDDAVVALLRDLGNSNFDVASRYELDQLLR LGVSPDRM  
SFGNTIKKEKDIA YFYEKGVRLFVTDSDIDKLSRAAPGSKVFFRLLTEGLGADWPLSK  
KFGSHPDLARQLMKTAVRFGLEPYGISFHPGSQQRDVGVQWSSALAIVSQLFNWARHDLKI  
DLKMINMGGGF PANYLEPTDSLQQAEDIKRF LDNSFGLVWPEKIVIEPGRSMAGDAGVI  
VSEIINI AKKSVHERYPWVFLDIGKFGGLIETLEESIKYPIYFEGQGSVEEVILAGPTCD  
SMDILYERTPYFMPSSAQIGDKVYILTAGAYTQSYSSVYFNGFPPLKSYILPSV\*

>SPBDM4\_v1\_80042|ID:27159818| Aminotransferase class I and II [Uncultured spirochete bdmA 4]  
MNQLAEELNEVLAGTVAERLFSEMGRHMYFPKGIITQGAEASERAYRFNATIGMAYEHGQ

PMMLDALRKELPGLTPTEAVAYAPTGGVLELRKAWKAALYKKNPSLEKKNISLPVVVPGL  
TAAVSYICDLFVEPGDTVIVPDLHWPNYRLIIEERKMAAGITYPLFSGNAFNVEALLEGV  
RQAGQRRGKAIIVLNFPNNPTGYSLTLEEADRIANGLLEIARGGTDILAIADDAFYGLQY  
ENNLLCESMFARLTNLHPNILAVKADGPTKEDYVWGFRMGFVTFGGRDLTDQQYDALTKK  
LTGIIRSSVSSSCSLSQLLLKALTYEGYDAQKAGYRAVLEGRYKAMKKKLASMKLPGGL  
EPMPFNSGYFMSFYCEGFSAEALRKKLLDEMIGITVSLDRYLRFVAFSSVEEKDVDDLCE  
AIAQVTAELQA\*

>SPBDM4\_v1\_80043|ID:27159819| conserved exported protein of unknown function [Uncultured spirochete bdmA 4]  
MKKILMLAAAFIAVSGIAFAQVDLSKVVDGKYFAEDKSFSSSGWKEQVILEVSKGKIVSA  
EWNGISNLPGVADKKTAAAGKYGMVKGSKIKAEWDAQAKAAEYLVKTQNVNFKFDAN  
GHTDAISGATLSVKGFFELAQEALKSSPVAKGSYKDGWYAAEENFDKSGWKNTVVVTVV  
NGSIVDLLWNGISKDPQAKSKYVQSQTGAYKMNAKNGEWYVQADRVAQAIKAGDPSKLP  
VKADGKTDAVSGVSITVPVPLAVEALKTAK\*

>SPBDM4\_v1\_80044|ID:27159820| GHMP kinase, N-terminal domain protein [Uncultured spirochete bdmA 4]  
MDKEYMSNIHTRPQKIPLLTIAELSKNEANRLAARFARLASKLPPTEGSVQELHYSSP  
GRTELGGNHTDHNNGCVLAASVDLDMLAVVRARNDIVTLTSSGYAPLSLDMADTGARQD  
ERGSPAIIIRGLAGWLSRKGASLPKGFDAVDSEVPSGSLSSSAFELLIAAIFDDIGN  
YGFSPVEWAIAGQFAENEYFGKPCGLMDQLACAVGGIVSIDFAEPQRPKIETVSYDFAAH  
DLVLAIVNTGSNHEDLTREYASIPQEMKSVAAALCEARTLDRVTKSDLLARTPEIRARCGD  
RAFLRAWHFVHETRRPGQMQRALARDDIAAYLSLVRESGRSSWMYLQNIQAGDPRRQSLA  
LALALSEDLLGDEGAWRVHGGGFAGTVQVYIPKSKFHEFLERMETVFGQDSVRRLNIRPY  
GVCREFLM\*

>SPBDM4\_v1\_80045|ID:27159821| Major facilitator superfamily MFS\_1 [Uncultured spirochete bdmA 4]  
VRTKKGFPGPYLGITFLIGFFFTMGLMDPLYDNYVTIFLSRYIQRMSLVGFFMTIDNILA  
IFLIPLVSAWSDRTHTRIGRRMPYILVLLPLTAILFGAIPYAAGVSLAALLTTLILLNVT  
KQSVRGPIVALMPDTIPANYRSEANGVINTMGGIASIVGTVGLARLMDLDTTLPLLGATK  
DRLPFPLAGIFVVLAVILLFAFVREKEPNPSEAQEQTPILESFRNVAAQKDKSALYILI  
ALFLWFLGYQGVLPFIGKYSVDILKTSTGTAALASGMVGIAYALFAIPSGYIAHRIGRKK  
TIRISLLVISILTIVLFPWITASLPGSLKLGTFWAIMFLFGIFWVSIITNSFPMLWQM  
AEWGTIGIYTGLYYTASQAAAILAPILTGFIIDIFGYQGIFLFCICMLCARFVMGKVTK  
GEPGEILNSEER\*

>SPBDM4\_v1\_80046|ID:27159822|ycjV| putative sugar transporter subunit: ATP-binding component of ABC  
superfamily transporter [Uncultured spirochete bdmA 4]  
MAKVELKGIGKVYEGNVRAVTNANITINDKEFVVFVGPSCGKTTTLRMIAGLEDITEGE  
IYIDSKLVNDVPPKDRDIAMVFQNYALYPHMTVYENMAFGLKIRKLPKDEISSRVKEAAR  
ILDIDKLLDRKPKQLSGGQRQRAVGRAIVRKPVFLFDEPLSNLDAKLRVQMRAELIEL  
HDRLQATMIYVTHDQVEAMTMGDKIVVMKDGVVQQIGSPLYLYNDPINKFVAGFIGSPPM  
NFMTVNVVEEGKVLIDEGSFRAPDEKQAGLLKPYVGKSVYFGIRPEDLLVADAAQSGQ  
KFDKAVTVVEPLGSEIHLQATTPTQNMIARIPPHHLHKHGDITTFAPVMAKAIYFDKETE  
KSILPVRWNEQEE\*

>SPBDM4\_v1\_80047|ID:27159823| protein of unknown function [Uncultured spirochete bdmA 4]  
MMDIRHFANLHGRARTRKAVLILERIEREWRSMDSYERSLVYARGLAEFMAISDESPE  
EVVLAQAQNFSSKADLQAINRFRHALMAASGQRPADWDFVAEPRPPLSRATSRPGRVYL  
EDIRSPFNVGSVFRTAEALGFEEIILSPECADPLHPRALRTSMGTVERLPWRRAPTSELA  
AMEGVFALEVGGIALQEFDFPLPGIMVLGSEELGISRETLGFCRRGCAEIPLVGTNASLN  
VATAFGIAGFAWLSL\*

>SPBDM4\_v1\_80048|ID:27159824|rsmI| Ribosomal RNA small subunit methyltransferase I [Uncultured spirochete  
bdmA 4]  
MVATPIGNLGDITLRALETLSVDTVACEDTRHTLKLKSHFDIHKPLISCHANDERRGAE  
RVVSLLEDEGKDVAYCSDAGTPGLSDPGALVVREARRRGHKVVPVPGPSAFACLVSAAGVS  
GRTFLFDGFLSPKPGKRRTRLKELLRGESFVLYESPFRVKGKLLTDIASIDPNRLVCIGR  
ELTKIHEEIIIEGTAELAARFPAGSARGEFLIVRGLANEPSSGQAGDDL\*

>SPBDM4\_v1\_80049|ID:27159825| conserved membrane protein of unknown function [Uncultured spirochete bdmA  
4]

MMKTMNSRKISFLILLVLFVIVARIIPFLTIVILWSSLLYVFLEPLHKKLKGPEGPHGR  
RTLRTYLSAILLAVLGLVIVLPLAFLTVATGKQLADILKSGVHFFFEANADKFKIDPQQQ  
IGAALQSFFGDSFDLSNFDLMKELQSFLASAAANQILKISTSLIKNVSQFVVTILFIMFTL  
YYLLMDGKALGDTFVSMMPIDPEHTRLFMRKLRETGRQLVIGYFLVALFQGLMMFIVSLI  
FGFKNNVLLAVLTAISSFIPMFGTSIVWVPMSISIALQGDIVKAIVFLVCAGIVVSGLDN  
FIRPMVLGGQLKVHPLLLFFSIVGGLAVFGFNIGLPLILTIFIAAGELYRALNEEGEN  
APKKEESAT\*

>SPBDM4\_v1\_80050|ID:27159826| conserved protein of unknown function [Uncultured spirochete bdmA 4]  
MRLVDLHHTSSASDGELAPSALIEKAHALGLSTIALTDHDTVGDIAEAREAAARAGIDFI  
SGIEIEIDFEPGEFHLLGYGIDDHAPALVKATERLARARHERNKAILERIAVAGLPLDTV  
KIAELSRESYIGRPHLADMLVEARCARNRQDAFDKFLGKGRPFYIKKFCLEALS VIR  
AACGIPVVAHPYSLFVSKAMLGELFSRWKEMGIGGIEAYHPTAKYGCVILERMAREREM  
FVTAGSDFHKGTRPACGMGRTAGNMPIEGRFRDELVDALMRFSTSG\*

>SPBDM4\_v1\_80051|ID:27159827| protein of unknown function [Uncultured spirochete bdmA 4]  
MMMVVRTAARNKIAHSMYKIAEFAQNVKRCFFSLRTVRSVSSFHVFVSHGIKLEVKEMNTQ  
SSPQFLSPERHPRGTGRRRTIVYPVLSRRARGLSLGINLFPDRKQCTYDCPYCEVPSFSNP  
GLALQPGEVTDALWKFFADDWPMYSARFELKDISLSGNGEPTLSPFLGEALDAAWGTLQG  
LAGPCSVAGEVPVVLITNSTGFLRPEVCEMLERFSRRAHLEVWAKLDGGLPYLHRMLSGS  
EFA YGRIADAIADFALHVPVKLQTMICRDSRSGALLFDTDGYLETLQSLQRRRAKVRVQ  
LYTVARMPAKPWVEALEDAELQTIARRVRGALPAEIGVECFGRGTGYIE\*

>SPBDM4\_v1\_80052|ID:27159828|hisG| ATP phosphoribosyltransferase [Uncultured spirochete bdmA 4]  
MTDKGNGKTELRIPLKGRMQAKVIELFNSAGIPVSVDEREYRPRIGNGKSQASVSKGIE  
YEAKLLKPQNVEMLQAGSRDIGFAGADWVRELGVLDVELLDTGLDPVTIVAAPEPVTA  
VFRASGGDVEAMRAICGRTPHASEYEGLAKSWIEKNLPGAELVRSYGATEVFPEDADI  
IIDNCATGTTLRINKLEIIDTLMTSSTRLYASKEVMQIPAKSEAADSLILLFRSVLEARR  
RVMLEVNVS AELLDQLVAILPCLRAPTVSPLGKGDAFAVKVAAPRDTLASLIPEIKRRGG  
TDIVVTQMSQLVP\*

>SPBDM4\_v1\_80053|ID:27159829| putative Histidinol-phosphate transaminase [Uncultured spirochete bdmA 4]  
MLRLDANEGRCLLSENDLGEILSPEIARRYPVRLLEGPLAERLGLPASCVLATAGADDA  
IDRAVRTLAGPGGLVMSTHPGFVEFLAAAQRSSAMYASISKDPFGPFPIREICEALREKR  
PQLLILSSPDNPSGGVLSPTGLAEIAAACGESGTIFIFDATYGDSPNTATPADAFASN  
VLVSGSFSKSRGLAGFRIGYVAGGPQMEGIIGRLAEAGPPFSLSSSAIEAGRRALSIDPD  
RVKAFVDEIRREVRELSALLKSMDFLVSESEANFVLIRADEAIPLAALRRKEIFVRTWQ  
GKPGYEDLVRITVPGEAGEFGELTEAII SVGKIMGINKEALA\*

>SPBDM4\_v1\_80054|ID:27159830|hisB| Imidazoleglycerol-phosphate dehydratase [Uncultured spirochete bdmA 4]  
MTVQNEKTSVRRATKETDVLSLAFEPGQIEIDTIGIFFNHMLTQLAFHAGWSLSVTCKG  
DLVDVDDHHSVEDTAIALGVAFKLAGPSGAGRARFGYAYAPMDEALARA VVDISGRGCCVI  
DGTFA SPAIGTLSSCNIAHFFQSFAANAGLTLHLDILRGENEQHKAELFKAAALALRMA  
LAPRAGAESGSTKGETAIDTEGAGL\*

>SPBDM4\_v1\_80055|ID:27159831| putative Imidazole glycerol phosphate synthase subunit HisH [Uncultured spirochete bdmA 4]

MSERPCLVIVETGVANLASVRALAEPLGMEPLV SANPEEVVRAQTVILPGVGAFGPAMQK  
LKDYRLDAALRARVAEGLPTAGICLGMQLFFETSEESEGV DGLGVFQGKVRREGLPLP  
QLGWNRIEPDAGARLLQPGWVYFANSYGVRADSFPELLHEDGGAGREPARRGAAGGLFEH  
IAAAITTYGGPFVSAIEAWRDDRPSLLCQFHPELSGVFGTQLFARWLELNGARRPL\*

>SPBDM4\_v1\_80056|ID:27159832|hisF| imidazole glycerol phosphate synthase, catalytic subunit with HisH [Uncultured spirochete bdmA 4]

MSGLA VRIIPCLDFKDG RVVKGVKFENLVDSGDPLERARIYEAQGADEL TFLDISATVEG  
RKTMAKEVARIRRGIAIPITVGGGIATIDDAARLLDSGADRVS VN SAAVRSPAIIIGDIAS  
QFGVQCAVVAIDAARNDAMPSGYEVKIAAGAVPTGLDAIAWAREAAIRGAGEILLTSIDR  
DGTSLGYECTLLGLVARAVGIPVVASGGASKLEHFLEGYQSGASALLAAGIFHRGEVSIS  
EIKKYLSAHSVEVRL\*

>SPBDM4\_v1\_80057|ID:27159833| conserved protein of unknown function [Uncultured spirochete bdmA 4]  
MIVPSIDIMNGRAVQLRGGKQPPLDAGNPLELAERYSRVGEFAVVDLDAAMGKGGNRDLI

LTLCKKYSVRVGGGIRSQELAVEYLNAGARFIVLGTAAKPEFLATLPRERLIAALDSRND  
TIMVEGWTKPREGKVEDAVTALAPYVAGFLVTFIETEGDQCGIDLERARALIARAPDRKF  
TFAGGAAGGGRTADIAVLDALGADIQAGTSLVLGDLSLADAFAPLRTDRPDGLWPTS  
CDESGKLLGLVYSSRESLKLALLETGKGAYHSRSLGLWIKGESSGNDQRLVRADLDCDRDT  
IRFTVRQNGAGFCHLGRNCFDDGYGLEKLDRTITHRMKEAPQGSYTRRLFSDEALLASK  
LREEAQELAQSKTKDEAVAEAADVMYFALVKTISMGGSLADIEAELERRSLRVTRRGNA  
KPDFEGPEGKNEWKSIH\*

>SPBDM4\_v1\_80058|ID:27159834|hisD| Histidinol dehydrogenase [Uncultured spirochete bdmA 4]  
MEKHTLKRITIDEIPEPSVRLFDPKVA AVAMA AIEAIRAGGEAALREWAVKFDGLPGDVP  
LVISRDEMRAAYESLPHATAELLARAKGRIAAFAAAQRACLAPLDLPAQGGRHGHEFVPV  
ERAGCYVPGGAFPLPSSAIMTLVPAKTAGVEEVWCAGPKPTPETLAAAWLAGADGFLRCG  
GAHAVAALAFGVAVPKCNVIVGPGGKYVAAAKRLLYGLVGTEAPAGPSELLIADATANP  
EIVAADLLAQAEHSPDAMPALIVTDEKLDRIEEELSSQLSALPEPNRGIARAALGNGFC  
CVEPDLGRAVLGANRCAPEHLELATDRPTELARNVRNAGALFLGSGSAEVFGDYGAGPNH  
TLPTGGASKFAAGLSVIHFLRARTWLAIDDPSSLIGDTAAFARLEGLEAHARAALIRKRL  
QTEP\*

>SPBDM4\_v1\_80059|ID:27159835| Thermostable carboxypeptidase 1 [Uncultured spirochete bdmA 4]  
MHKETARLVELDREHSLVHIGAILGWDQETYMPСКАIEERASQLALLEGLAHQKAVNPE  
VGELLSALEAKSDLSDDEKAYVRVRRDYDRETKLPESFVTEYAKDASISQATWVEAKRN  
NDFRAFEPHARMVELNKERATYLNPGARPYDVLDDLYEPGSTQESIAAVFSTMKSYLVD  
ILGKIRSRPQIDDKCTGLQVSARTQERISHYCMKALHYERDRGRLDVS AHPFTTTLGTD  
VRITTRYIEDYFPSSLFSTIHESGHALYEMGIDPNPEFRGTKLADAVSMAVHESQSRLWE  
NIIGRSHAFWERNFPVLSALLGEAGDGLDLSFVKS VNRVSPSLIRTEADEVTYGLHVIA  
RFELESALFDGNLSVGDMPAAWQAKYRDLLGIEAPDDRQGC LQDVHWSMGAFGYFPSYAL  
GNLYGAQFWATLKKDVPDIETRIAEGETLSVLRWLRANVHVHGSRYTPGELVEKVTGQPL  
DPVWFERYLREKYSKIYGF\*

>SPBDM4\_v1\_80060|ID:27159836|recG| ATP-dependent DNA helicase RecG [Uncultured spirochete bdmA 4]  
VFLRELTQDLRILRGTGPATLRALANLDVHTVADLLLHLPRDYEDKTKIVPISRFSSEGKV  
YTTARILRHEWFGRMRTLKIVVADDSSEALLCFNRPFLEQMAPIGSTVQIYGKFKQFK  
YGEIQSSAFEIKRLD GALNLKIKPEAALSPVYLSERLSQMALRRMVELALS KFAPHLED  
ELPPSLRAAYGFPPKAEAIRAIHFSSWEAAKRAHDMLAYEELFYFQLGIALRMRSRRAK  
VIERRASPGVLARQLRERLPYALTVDQESVLGEIVDDMHKPYPMARLLQGDVGS GKTIVA  
ILAALHAVERGGQVAIMAPTELLARQHATIAAHLVEPLGVRLAFVTGSSISNAARPLLAA  
LKDGEIDIAIGTHALFSEDVSFKNLELVIIDEQQRFGVLQRIALYKKGRIPDFLMMTATP  
IPRSLALTFFGDLQVSTILHLPPGRKPVVTHLAHEDRRHRVYEFTRGKLKEGRQAYFVYP  
VISGSERLDRDAESMASHLAKDVFPEFKVLLHSRLGDEVKMEVMTKFAAGEISILVAT  
TVVEVGVDVPNATVMVIEHAERFGLSALHQLRGRIGRSSHQGYCFLVYSKDLTEEGRLRL  
KALYETTDGFTIAEEDLKIRGPGDMLGIEQSGDLRLQIADMRTDFELLKKARHDAFGVIE  
SDPALSEPDHEVIRQVLARANPFSEK\*

>SPBDM4\_v1\_80061|ID:27159837| protein of unknown function [Uncultured spirochete bdmA 4]  
MKKSEKLILESSNPDEYVSNLSKSR LSPA EKAKLARLWMENTGYTRDDIIRARNRNIYWR  
KRKMEGAAERTRRRMEEHDYSQSKNIEWTREHLSEFLTLNRKDMYGRYLHRDWELAAQFE  
TSIPSIQYLRRKYNKVRKMLGPAARREKIIDYMSCSELVLQHGGPKSRKRKRSSLPS\*

>SPBDM4\_v1\_80062|ID:27159838| putative Methyltransferase small [Uncultured spirochete bdmA 4]  
LSHALFSSFDIDAGTRLLLKEIAHEPGIVNAKRLLDAGCGTGIIGVCLAASCPDMDVVMR  
DRDFRAVSFSARNAARNGLAVELRGLGGARLEPCRKRHFSKIKVAERNAVPMIAEAGLLC  
EPDGRGPYDVVLSNLPKAGPLVLAQYFSTVRAELLRDGGIFAFVIVTPLAEQARAWCAE  
AGFSLRRTVSTKNHMVAIAQVPEGSSTASPGAASGRWFSRYVRSHVEKRIAGALLAWDGI  
QGLSEFDEPSYATTICALSLARKVFAGLLVRRALVIEPGVGIAPLWVQTVLGPQEIVLKSH  
DTLALAASSHNLGHAGRHN AVLMLPEFFLQAQLQAGQPSNRPSNAGLEYGGQLAPASTDA  
IILFLEDIPKFDIAAYYWPLISKVLKRGGA VVITAESTQTERVARQKPSGFSKSPFAEHK  
KGWDAIAFLRD\*

>SPBDM4\_v1\_80063|ID:27159839|efp| Elongation factor P [Uncultured spirochete bdmA 4]  
MVRGGDIGIGTCLLINGTPHIVVEREFVSPGKGS AFARVRAKNLKNGNVITQTIKTADFV



EDAQVDLVDCQYQYSDGEFFHFMNNETFDQFEVPLAAHEDRAPYLKDGETYTIVMWEGER  
IDIKIPYKMFVFTAESSENYIRGDTVSGATKPVTTETGLVVRVPLFIKQGEKILINTETNE  
YVERVNE\*

>SPBDM4\_v1\_80064|ID:27159840| Major facilitator superfamily MFS\_1 [Uncultured spirochete bdmA 4]  
MTKKKQKQILLALMVLVMIILNADGNVMAPTLVTIEAEFGVSDAQVGMGMFTIVGAIVS  
LLWGYFADKASRKLFLVLAVAIGEIPCLLSAFARSWNSFYVLRMLTGIGVGAAPLVSFI  
LGDYDEKERPVTTAILATAFGFGNIVGTVVGGYLGPSLGWRIPFILISAPNFILLALFW  
VLVPEPQKAASEDATRELVAAGILYPRTIKLSDYAVLFKKTNL YLLIQGIAGTVPWGAF  
FFLNKFLTEKGFDTGTATTIYLIFIGMTLGTLAGGKFGGMVFKKSDRALPVFCAVTTV  
AGALGTFVVIADVAGFAVLAALGFFTAFFAAMTGPNMKAMLLDVNLPEARGAIFSIFNLT  
DSLGTGIGRWVAGLLSATLGLSALGISTAFWFLCGAVLFAARLIFPPDRISLHREMEAA  
AAEMKAAKVSQ\*

>SPBDM4\_v1\_80065|ID:27159841| Lysine--tRNA ligase [Uncultured spirochete bdmA 4]  
MDVEVLQTRSRMVSVIREFFLSRGYLETDTPALAPSLIPESCLEVFATEYVHPTEEHRPL  
YLVPSPFIWMKKVIAATGRSVFQLCKAWRNAESTSRIHNPEFTMLEYYGVGLSSGDNIRL  
TEELFAALASQETPPRARPPFRVMSMCEAWTEYARADLDALSEPEAMRTACRERGLLVAS  
DAAWEDAFNVFFLSLVEPALPRDRPLVLD RYPAGIECLAKDIPGTMYKERWEL YVDGIEI  
ANCFTEMANPAAVRQYFSSQSAKKLSALVPHRIDDSYASVFEHFPPCSGVA VGFERLMMV  
LLGKKSIAEVLFPFEAFSD\*

>SPBDM4\_v1\_80066|ID:27159842| putative Iron-sulfur protein [Uncultured spirochete bdmA 4]  
VTVEEVQGGPPVKLQGEAGARAARWLLFHVQEQQFFSYAILGKEEWETVLLERGFEEEG  
ILETARSDAAGAMLVVALRYAPDVEPEPAAGRAARGLPPLPLPGAGKPVAKVGRFARGNW  
YREVIDRLATS AKATATDMVA VGLPFFPKRWHRFANSRFPEKALAVAAGLGATGRNGLV  
IAEASETGGQARSAAGGGLPSGGVIRAYFHSSARSSAVLLGLMLLPFDLEQAIIPRHS  
PQAMLSLCGNCRRCVDACPSRALHFAPEPASWRASGRVDFDRHRCIQHYASISGPLPDFIE  
ASWQNQLYGC DLCLEACPYFRPDPDAHVSSGHIGGLFDAKVIAGMEDTQLRALFRGSALD  
QRWIEPEALRRDATLAVKNC\*

>SPBDM4\_v1\_80067|ID:27159843|glyA| serine hydroxymethyltransferase [Uncultured spirochete bdmA 4]  
MSYIQSMDPELYAAIEAEGRQRDKLEIASENYTSKAVLEAVGSVLTNKYAEGYPGKRY  
YGGCEFVDIAENLARDRAKFLGADHANVQPHSGSQANMGVLFALNPGDTIMGMSLAHG  
GHLTHGAPVSFSGKFYKVVS YGVNPD TETIDFDQVAYLAREHRPKLIIAGASAYSRIIDF  
EAFRRIADEVGAYLMVDMAHIA GIVAVGRHPSPIPVADFTTTTTHKTLRGRPGGMILVGR  
DKENNRGIMAPKGDALRWSEVIDSMIMPGIQGGPLMHVIAGKAVALKEALEPDFAEYID  
RVLSNAKVMAQSLTAGGARIVSGGTDNHLMLVDLTPLEITGREAEKWLDEANITVNKNGI  
PFDKKS PFVTS GIRVGT PAVTTRGMGPAEMETIATFIMDVLKSKGEAQVVARVKQEV LAL  
TKRFPLS\*

>SPBDM4\_v1\_80068|ID:27159844| exported protein of unknown function [Uncultured spirochete bdmA 4]  
MKRRSVVIGGALVLLFVTGGALLFYWMLHPALSVIDPVTPLPDDTVSIVGRNFGEAPGEL  
LFDNIPLPGHAIQSWSPTYISFKMPSDVDSA VVRVRTTFGFSNPLMLANS SKIPKAAESQ  
AVSEFRPNITGVKPTANIQIGKSIVISGSHFGEPEENAAVFFTKIPSISTLETEDLNNFI  
KIESASLLVDRWRDTSMAVRVPDGVESGYV FVRTKNGISNTYPVSFSLGRTWRGESSK  
YVIEQKVILHVTA SLPDGRLSLFLPKPATTQNSAETNIGSGGDHLNADHANWQEFRFGQ  
DDASKSKLEITRQFIVDASEIRADINVGSIQAIGA APPAFLAPYLAADALVPSGDEAIVA  
AARTIQRKEKNTFRQVALAAQWVFSNIKLNEQDQGLSDDALPALKNKNGGIRALALIDCA  
LLRALGIPAIPVAGFLVAEDMRLIPHYWGEY YLLGIGWIPFDPALATGTVPAGFVPGFSE  
RLTYRGRIDNKHIAMSRGYQLLPPVQPEAQKKVKIPWSLSEYDELVQGVSYTSIWNPPEM  
APSAPQ\*

>SPBDM4\_v1\_80069|ID:27159845| exported protein of unknown function [Uncultured spirochete bdmA 4]  
MRLRTLILVVFSLLSAACA FSTPPVPATMPAPPQTGAPSSPGQESAPSLTPAAPPNVPV  
FQFHFRAAFMLTPAMVA AIQSASLNAQDSKSKSNSFS DRENNPAWEDPILREVSLAAPLG  
IKIQGERLVAMIVFIPVELVKKDLTMLVQNQIYARSPDNSIQMNTSVHTVRVPLGALFY  
YPLGGDAKQGA AVAIEILINQK\*

>SPBDM4\_v1\_80070|ID:27159846| conserved protein of unknown function [Uncultured spirochete bdmA 4]  
MCPDETLLTAYVDDEVSPWKERIEMLHGQCERC SRVAQYRALRSALRVADAIDDSLQ

EAAQRIQASLDSRMMELSRAPHRKSAFERYPIFYMPGSKRISVPLPVLAAASLLLFFVFFAG  
LAFGFFGLHKNASQAFVLSTKLPADTSANIESLVSTLSQTDPSMFVTIKAPENISQPLPN  
TPPVYVIYNTADQKPTVMAVPAQGEAK\*

>SPBDM4\_v1\_80071|ID:27159847| RNA polymerase sigma-24 factor [Uncultured spirochete bdmA 4]  
LFKDKDDGQEPDFDRIFVQNIDLLLRIAVRITNDWESAEDVVQDAFGKLIKRMQFPSDE  
DARFWLIRVVKNGAINWSKRKVREFKAYEHWWNAETTQAKTSANAALNGEEQNQNAGTDQ  
SAHELLMEESAQEVRAALMRLPEKLRIVLILKEYEGMNYKEIAKVLGITEGNVKVRAFR  
AREALFSLLEGGSHVSR\*

>SPBDM4\_v1\_80072|ID:27159848|cysS| Cysteine--tRNA ligase [Uncultured spirochete bdmA 4]  
MHDVYFFNTMGRSIQRFEPLHDHKVGFYGCGPTVYNFAHIGNLRTYVFEDILVRILRRFG  
YEVTHVMNITDVGHLSGDDDTGEDKMKVSARERGGKSVLEIAQFYTDAFFRDTERLNINRP  
TIVCKATEHIQDMIDLIRRIEANGYTYFAGGNLYFDVSKFDHYGELAGLRDLQKAGARV  
EVDPNKRNPYDFVLWFTKSKFENQALLWDSPWGRGYPGWHIECSAMSMKYLGDSDFIHAG  
GVDHIAVHHTNEIAQSEAATGHKWVNYWMHAEFLVLDKKGKMSKSSGSFLTQTLVDKGYD  
PLDYRYFCLGGHYRSQLSFSWEGLDQARAARLSLVDRVIALVESAGTPAPLAQLSERATQ  
YRAAFDEALADDLAMPRALAQMWMLKIDSEMAPAEELALMLDMDDVLMGLASAQKREAS  
VDAETVRWIEEKIQKRAAAKKARDFATADAIRNELKAKGIQLEDRPDGTAWKLTE\*

>SPBDM4\_v1\_80073|ID:27159849|murB| UDP-N-acetylenolpyruvoylglucosamine reductase [Uncultured spirochete bdmA 4]

MGTLWQIAQKINTEQCSAALGEPMWAHTTFKIGGPADLYVRPRSIRALTEALDRLRSAGL  
PVFLLGGGANILVGDRGIRGAVIDMGLLSSIRAGAFGESADSDAEQTRGQIALHAECGAS  
VSALCEEALVRGLSLENFYGMPGSVGGAIYMNARCYEDDISHIKKITYIDA V GALQEI  
AAASLPWSYKRSPFMCGEALAGSTVGAAMFMLVPDNPQRIAGRMRARLADRMQKHHFDYP  
SAGSMFKNNRAFGKPTGKILHELGLRGYRIGNAAISSWHANIFINLGGATARDMRALIEH  
AQAVVFAATGWHLEPEVLFVGEF\*

>SPBDM4\_v1\_80074|ID:27159850| membrane protein of unknown function [Uncultured spirochete bdmA 4]

MNVIHDPVGI F ALLASVLFSAWLSNVFRFNIAVILLIFGIIAGPEVAGLLDSGAVLQIL  
GSIGIVYVFFFAGLSTRISTRFRHDA YGKIPFNKRSPQFFVWTVIPALTGIAIGFVIGK  
SPLQAAAIGIFFASAGIASSLEENYMKFSSLESYGLPGSVSLLVVFVLLALDAVAGGADA  
RRCIFVLASGCILAGVIWSLFPRLASIFLRRIKSVGVIEGWFLFLLVFTASYAASFLSIP  
NWFTAYIAGIALSSAAMTTSGSGTGRILLKDDIFSPAFFLMGVSIHISEFSSNTQWL V W  
GGIFIAGGLAARMLVAFFSKRIALMKGPMLGLAVPFTTFSLAISWILYSSGIFDAPLFMG  
AIALALVTGIINSMLMKKASSAAKVLSSNPTEKAAFVIPNRILIALSKPSSIPHLLELGA  
ILHGADNRSPLFPLVVHSPEDSEIAQSAGSETILATAVMKLSGMQKSVLPLNVEAINPGL  
GILESAIQKNADTIVIGWKNPPRLAHAFNGNIIDQIVSGSNSMVLVARGRFPWKSSKQIL  
AIFPPLVDMHSGYEALQCIKRFARDSFATLHCFIPKDYEEQLADLWKITFSSINYKIST  
FSTWREIPDLFQKAATVHAAIVLVSARPGEASWSPA FERLPHILAE NLPEANVLM LYMPS  
YNEQREQPSPQAPPVEVEAASSPQRAEASNAEALLLESVRAGRIQVNMQGSALAEGIYK  
IIFSAFPNGEKKQLRALADHCIEMLQRQPIEIEPGVVLLHDRLENIPYPMVCFGAQKTGY  
RLSALESPVQIIVLIVPVHQSADEHLRFLADIAALFRMRNLRQRLMDANEPEDLLSYQ\*

>SPBDM4\_v1\_80075|ID:27159851| conserved membrane protein of unknown function [Uncultured spirochete bdmA 4]

MNALLIALGISFLVNALFFVFASIKKTDVVTDL SYGLSFFLTS LGLALVTHVHGFFWLFP  
FVAVMLWAARLSFYLFRRILTIKVDHRFDGRREDPVKFAQFWILQAVSTVIIMLPVIIGA  
SREPVGFSFLQLLGGLVWLIGLLIEAVADAQKFKFKKNNPDGFVSTGMWSWSRHPNYFGE  
MLVWWGLWLYVLP SLQGWENIAVLGPLYTILLRFVSGVPLLEKTASGKYGSLPEYKDYV  
SSTHLLFPWPPKSKSANARSSTASIPTIGSL SDEEFAGR WYELGRIPLPVARDWIMTSDV  
YEKQPDGTWHVRYEGKPDQDRTRTKVLRQKLRPDAAAPGEMLV SFLPGIWMKYRAVHMS  
SDRQSM LVTSSKMKYLWIMSRNADLPEEEYQ TLLSTAASLGF DTRAVQRIPQH\*

>SPBDM4\_v1\_80076|ID:27159852| exported protein of unknown function [Uncultured spirochete bdmA 4]

MKKAREFAMV FVLLIASLSGVSA YDPPKGASLLGRIYSPWTMGSLSLTERSSGAWNFL  
NPASTAETELPELALS YTG IADMSAGSTQGWGSAGMAAFSLPKSYGVWNGSVRLFSAPGA  
MTSMPLGTFVTAGGGFSK KVSSTLSVGASAWLAMGGNGTFGWGLWSDIGAVKELGDLGLF  
KNSRLGFVLGGLGKEFN YQTPPVGISAGSTASTGFPA AFTPAIGFSADLLSKYNL G I RAN

VDLRAPSFNDIEAEAGLAFSYRNLLNLRLSMASLYDIQQKSGRSAWPSITLSGSIPLGK  
KGPQNKSVSEIAPAVGFMPLYDSLDAFVVGARLTWGQPKSPPEVTLELPSTTSGTPVEY  
VSPNADGKQDWLELPLTIKDEQRTIAGWLFKIEDRSSGKVVRTITEQSDLPEINSFSTL  
KEFGFYSKHSVLVPDVLRWGDKDDQGNLVPEGTYIASFHAWDDLGNNTNINYDSCMNVVVD  
RSPPTVNAWVMGDEQLFQGNDSLIFSPDGDNNKDIISFRTQGSIEDNWKEYILDAGGNAV  
RTMDLKGRSAPRDFVWDGTNDAGKRVPDGYQFKLSSVDPAGNVGFKTIGVSADKSDWIV  
VDTSRPAVRVAADKKAFAKPAKEGKTGTIDIDFNLESLNNLVSWKEVIQDQNGKTVWSSSG  
DGATPPVSSLTFNGLDASGKAFSDGQYRAGIEMKYRNGYSPIVYSDSFVLATPPFAEIV  
LDDARSVSPDGDGSRDALTFATGSKEDVWNL SIRNEQGDLYVTQQYRDALPDRFVWDG  
RDSTGRRIADGKYTLELASTDVAGNEFHTDYSPIVDTRTPKAAFALNREAFSPNDDGVA  
DVLGLNIKLENTEGLLVWNL DVVGTAGTQTAKGEAPRFLLSGDGTNPPPGALQFDGKSQ  
RAPLREGTYHFELALEYENGWSTTQSSPFDIINTAPQAQISRSREFFNPRGGAQQSQMI  
ISQLGSEEKLTWTELDAQGLTRRKWEFKNSQPAEILWDGRTADGALLADGIYYRLLCV  
DSAGNSFASEPLKIGIDTASQSSLSASHMAISPNGDGIQDEMSSIVVTAPQTVGDWRL  
AVLAGQESVMEWKGTGNVPQSITWNGTSLARLSVPDGNVYAVFHAEYPNGDSTEVENLGPL  
VVDRAAPKAEAKVESTIFSPNDDGINDTLPIQQTSPVGGDWRGTIVDMAGKEVRGWTEG  
TVQSFWDGRDNAGNIAADGKYQYKLESKDAAGNAFSYTSVPFIEIETEKKA VRLTSDRA  
FSPNGDGVKDVVFTADVVAPEKVKEYVLQVVAQDGPAAVAVRTWKGETPLGRYEWGRGE  
TDTQIPAPDGHYATSLKVVYRNGDEAESATGTFLDRQFPQIDVKVQGSIFSPDGDGRSD  
TITITQKSAQGDWKGTMKDSAGNIARTWTWQAEAKDFVWDGRNASGSAVQDGFYDYTVE  
SQDAAGNKTVAGPFHIQVETGRRAVQLRLSDKAVSPNGDGVKDELVINVEADARDRIKQY  
SLAIRGKDGAAVRTWTGGIDLAREYRWNGRNDAGAAVPDGDYSVSLEILYLNDALAKDGP  
APVSVDRAPQATVNLRSIFSPNGDGRADTVEITQNSVYGDRWNGQISSEAGKIVRTWE  
WYPM LADIVWDGKDQNGKLVDPGAYYELRSIDEAGNSFILPRQQIMVDATQKNVSLRVD  
PSAFSPNDDGVKDVAYINISAPKPD TLVNYSVSIFSGAKAVQQAAPLRGWKGTDIRAQY  
AWDGMTDAGLKVPDGSYSVYLSLEYANGDLFNFGPMQLVVDTVAPRISLSADSLLFSPNG  
DGIKDYITITQSSDPGDDWSGRIRASGATVRSYSWKGQAKTFTWDGLDSNKRLVPNGTY  
TYEVVSVDAAGNSASAVVKGITVDATKPRVFVTASDTGISPNGDGIRDDVSFSLTVENRE  
GVESWRFSLLDSKGVRSFFGGSGADVPTRLVWDGRDLQGGVIEDSFTGKLVVKYLKGDV  
AEASSGKIVVKIEPPKVDITVSPEYFSPDGDGVDDILTFGIAADKNAGITEWKLEVMETA  
VVESSTMQGTGPTRTFMAWNGKGTTPAQITWNGKSSKGELVESATDYPFEFTCWDALGNQ  
TKVKGVIADVLDVIRLDGRLKIRVPSIVFRANHADFIGLDSEIVSRNERVVARVAQILGK  
FPDYRVRVEGHGNNVKGMLGYSASRIQQEEVNELIPLSTERAEVVRKMLVDNGVDPRLS  
VEGLGSSEPVSFTDVQNRWKNRRVEFVLIKNQ\*

>SPBDM4\_v1\_80077|ID:27159853| conserved exported protein of unknown function [Uncultured spirochete bdmA 4]

MGCAKCSIMKALLFSMLIFAVLPSLAEAIPEFPYRLFPSLYRKENFTRIDQNMSPANYQA  
SGGFLWDRVPLVANNTIVAYYGSPLSDRMGILGRYPKEKIAEMVKATASEYDQVNGKDG  
IPALYIYGTCWPGGEIGYLLDKALVEYIKYAQSEGMLVFVDHQIGRYSVHEAMDKILPF  
LQYPNVHLAIDPEWRTLSPMKEIGSITAEELNDAQDYMDAYIRQHNIPGIRMLVVHQFAD  
KMIQTRREVRSHRDRVILIHTADGFGTPQMKKATYQRNALALNMPVKGFKLFFKSDFPAA  
GFDMPMLMSPAEMQLDPRPSLIYQ\*

>SPBDM4\_v1\_80078|ID:27159854|ffh| Signal recognition particle protein [Uncultured spirochete bdmA 4]

MLEKISFTDVFRTISGKASISEKNVEEALERIKIALLEADVNVRRVRRFINGALEEAK  
GEKVLRSVTPGQQFIKIVYDRMVALLGDERQDLALKGTDTQSVILLGLQGSGKTTTAAK  
LASLLKKRGRKVLLAACDLVRPAAAEQLAVLADQVGVVDVHREDGADAVQVARNALARARR  
EGHDVIIVDTAGRLQIDEPLMQELARIRDALSPVESLLVADAMTGQAAVDIAKAFDEKIG  
VTGVILTKFSDTRGGAALSLSITGKAIKFIGVSRIDGLEPFYPDRIANRILGMGDIV  
SLVEKAQEVYDQKEALDLERKISQETFTLEDYLDQIHKMKMGSVKSMLEMIPGLAQID  
EDRIDLQEMKYEEAILLSMTKKERQNYLIVGPSRRTRIAKGSSTVAEVRNLLKKFEKSR  
SMMKKMVKNKGAMAKMFGGKTP\*

>SPBDM4\_v1\_80079|ID:27159855| Metal dependent phosphohydrolase [Uncultured spirochete bdmA 4]

MTREQAVALWRQWNSDESLWRHALSVEAAMRHFARKYGEDEEYWGLVGLLHDIDYQKYPE  
EHLRHAREILAPAGFDDTFIRSVESHGWGICSDVEPTHVMEKVL FATDELTFGIAACAYV  
RPSRSVLDMEVKS VKKKWGSAAFAAGVRRSVIEQGAQMLGIPLEELIGETILALRSAAE

TGLKGNL\*

>SPBDM4\_v1\_80080|ID:27159856| Peptidoglycan glycosyltransferase [Uncultured spirochete bdmA 4]  
MENHAQARFHRMVTLVVFLVIFAGVVCVRYAVLGLLEGPEKTGLSENTPIERGRILDRNG  
KVLAFDIPKFNLAIRKNEIDPYRITEDLSIVARSLNINADVLERKIRESGQNFVYLAKRL  
DVDTVKPLQEKLDKQQLAGFVLEEVENGRYPEGRLASHLLGFTGEGNKGLEGIEYKYNAE  
LSGTQGDKARGDDIYLTIDARLQYALEQITRKAIRDNKAESLFMMAMDVNSGEVLAYVQM  
PDFDPNNFGSFREAEREDRMSVYSYEPGSVFKIFSMASILDAGLITPKTKFNC DGAYRRT  
LPSGEKIVIKDLHSYGVL DLAGILAKSSNAGAGYASDRISENEFY SRLNFGFAEKTGIG  
SPGENPGSLREPAKWSARTKPTVAIGQEIRVTALQMITAASA VANGGILLKPDTVMRIED  
ADGKALYSHETVA VRRRAISPETSRAIMTAMESAASLEGTGWRAKVPDVRMAVKTGT AQMI  
DLKTKAYS DTDYIASTLGVLPADNPTIAIYVAIVKPMGESYLG GQIAAPVLRDAAESAID  
ILGLPRGKSQNTTHGGLVTIQEPAPASIGSKMPDLTGFSKRQLLPLLLRGDL DVTL DGDG  
YVVAQSPPPGTA VQGGTRIILRLQ\*

>SPBDM4\_v1\_80081|ID:27159857|lepB| Signal peptidase I [Uncultured spirochete bdmA 4]  
MSQAVRHAGKKLDSPALTLILVVVAAFLVRTFILDAAVVEGKSMLPHYRNGRVVLI FKAA  
YGIRGVGGKYLVCWKHPPRGDVVAAVRPNSREIVIKRIGEIRGDGGSSEYFLIGDNGIES  
IDSRDFGLVTLNAIIGKVVPQR\*

>SPBDM4\_v1\_80082|ID:27159858| protein of unknown function [Uncultured spirochete bdmA 4]  
MNSLYQSEDAVLEADKVLNKPLVSVLSGEDILAKAPAKSHKERSGKRRHPLFEKKT PENR  
KKRAKNDQPRKDFVIEPFLSPSSVTNITLEAKAPVEIAPAKNRSLLHIVPTGNTRKILLR  
AFVVLMI AATMAGASFLAATLISHPHVIALPNEDSAQEALMAMLEPEPSAPPSGDTALP  
PLPSLLVERTYTVRRGDSLQTIARQFGLREDTIISANGLSSKNQLQVGKTLKVPNMNGVY  
HTVKRNENLSVISRAYGVDMTRIADANNISSSTIRVGDRL LIPNAKLDASVLRNFYGETF  
IWPVRGPISSPFGYRINPFSGQRTFHAAIDIVVNKGTSVKATREGKVADTGYN AVFGNYV  
IIRHTDGYQSLY AHLDAILARKGARVNQGEVIGRSGNTGQSTGPHLHFSIFRNGQAVDPR  
KYLK\*

>SPBDM4\_v1\_80083|ID:27159859| RNA polymerase sigma factor [Uncultured spirochete bdmA 4]  
MAIADSDESLSLYFDSIRKIPLVSRQEE SILAGKIAKGDKKALKRLVEGNLRLVVRIAKS  
MWTPPHSLDLIQEGNIGLVKAAERFDAGKNVKFSTYAVWWIRQAISRSLVNTGRQIRLP  
HRKEDALRRINAIQMRKSLEISRAPT GKELASEMGCSESEVSAILHMGDQPV ALEQAGED  
ELSILEVYEDWRYNPEREIEKASISWESTWLLSTLSARERE VVSRRFGLGSGREQLKAV  
GSVVGCSAETVRHIEKKALQSLWQAAASVGLTA\*

>SPBDM4\_v1\_80084|ID:27159860| Divergent polysaccharide deacetylase family [Uncultured spirochete bdmA 4]  
VRKKHVHRGFSYALILASAALAAFAASAIINSCTPKESSQKTQKSPYGTPEYVIELPPGY  
EDLKVIPQSGQGQKTQPLSGSAPT NESQSTPQGDGTAVARLAR PQGPQEEAPRVTGHPTL  
IIVIDDVGYNNGELKPFKLPFITFAVLPQLPHSTDSVLAIRDAGKEFILHQPMEALGG  
NDPGPHAVYLAMDDATIEKTV AENIDSFPYPAGMNNHMGS AVTRDEKAMEPILKLVKER  
GMYYLDSL TAPGTVTVRLCQEMGTPYMERNVFLDNNTDRESILAAIDEGKRIARKNSAAV  
MIGHVWSSNLAATLMNIYPELVEEGYSLSTISEYMRMQAEENTGHADSGH\*

>SPBDM4\_v1\_80085|ID:27159861|gcp| O-sialoglycoprotein endopeptidase [Uncultured spirochete bdmA 4]  
MRILGIETSCDECAAAVVEDGSRILSNVIMTQIPLHERYQGVVPEVASRAHIEWIMGAVK  
RALSEAGIGVASIDGIAATAKPLIGSLAVGLSFAKALAWSRNLPFKGVNHMLAHL YAPQ  
LASHIEYPFLGLLVSGGHTIICRADD FDKITVLGTTIDDAAGEAFDKVAKHYGFGYPGGL  
VIDQLAERGDERAFRFLPSLHKGEHRYDVSYSGLKTA VIHHLPSYMRPGATATPENIAA  
SFRKTAIDILLSRLYRAVRDTGIQTVVAGGGVAANA YLRRELGKNDDL RVFFPPLALCGD  
NGAMVAGIAWHYFSRGETDGWDIAPSSRVVDFKRR\*

>SPBDM4\_v1\_80086|ID:27159862| putative leucyl aminopeptidase [Uncultured spirochete bdmA 4]  
VHSLSEAHIALSQCLELKKNEKILIVTNP DTEQAEIAAALYEQARAMGAQAGLLYQPVK  
TQADFAEDEVLRAI EARP DVILSISTEKL GKDKARLAAPLAGADGRSYDHIFNYLLHGIQ  
TIRAVWTPGITKDIFVRAVPVDY AAMRDTADRLEALLDEASAVMVRSPRGTDITFSVSGR  
KAMRDDGDFRNAGAGGNLPAGEVFISPAIKSAEGTIVFDG SISDIAGDIVIRTPIACTVR  
GGYVMGIEGGEEARRLEKALMHGLNMAATLVRDQGM APELALS YGTNARHLGEFGIGLNP  
AARIGGNMLEDEKVMGTIHFAIGANYDEDEDAPALIHLDGLVKSPTVLLMPTGEEVAVMEG  
GALAV\*

>SPBDM4\_v1\_80087|ID:27159863|lysS| Lysine--tRNA ligase [Uncultured spirochete bdmA 4]  
MEQKKTIIHWADQTAEKIVQTWGEKDLTYCASGITPSGTVHVGNFREMISVELVVRALRNL  
GKNVRFIYSWDDYDVFRKVPLNMPNPELLEKYLRFPITMVPDPWGRDESYARHHEVDVEK  
ILPEVGIHPEFLYQANKYRAGTYAKGIRRALEMGRHLKTILDKYRDEDHKIEGEWWPVS  
FCSNCDRDTTQIDGWDGDWGLSYHCESCCHSETGDIRTLKGVKLVWRVDWPMRWEYEKVD  
FEPAGKDHHSQGGSFDTSKHVVEDVYGRKPPVTFRYDFIGIKGSPGKMSSSKGKVVDLYE  
LLRVYQPEIVRYLFASTRPNTEFVISFDLVDVIKIYEDYDRTERIYWGAEKAKNEDVEALE  
RRIYEFVSQVGEVPEDMPYQIPFRHLNLLQIHLGNIDKVISILPDLKPSQEPRVRRRAQC  
AWYWITECAPEDFMFSLRQPGERAELSAIEIGALQSLRDDVVAKLETYGGENEVAEAIYA  
VAQASGIEPKKLFASYQALIGKDQGPRLAGFLNAIGKEKVMALLRQY\*

>SPBDM4\_v1\_80088|ID:27159864| Oligoendopeptidase, pepF/M3 family [Uncultured spirochete bdmA 4]  
MTGQTAIPEWSLEEVFPGFDSLEYRQAKEEVRTSLETMRRFLLESSPPEGGADFSDWLCE  
LLDKLNRLEMLADTSLAYAYARFSTETKSPSVLAELNKIEELLVPATTVQVLFNRLLARH  
EDTVRKAIKDDRRFGEYAFILEEALMFQKHQMATELEDLAADLSRSGAEAWSRLQESILA  
NASAPWDEASGARKTMVELRNLAYDPDRAVREKAYRLELGIWKTYEIPVAAALNGVKGT  
STLNKRRDWESALDTSLAQARISKATLDALIGVMEESLPMWRRYLRAKARLLGRERLSFF  
DIFAPLQQTGSEIPTFGWEEAKDFIVRQFGTFDADMARFAKHAFEHROWIDARPREGKVG  
AFCTHFPAAKQPRVLCSEFDGTYSSLITIAHELGHAWHYETIKDRPQLLSQYPMTLAETAS  
IFSETLVSNAAMAEIEAGSRMPLVELHLQDACQVIVDILSRFYFERAVFKERDEGELTPD  
RLCALMLDAQARTYGDAMREDERHPYMWAVKRHYYPGLSFYNFYAFGQLFGMGLYSLY  
KKEGPSFAARYRELLRATGSLPAVEVARRAGDFDFETPEFWK GAMMAFEPEVAFLEAQGRA  
TVQY\*

>SPBDM4\_v1\_80089|ID:27159865|ndk| Nucleoside diphosphate kinase [Uncultured spirochete bdmA 4]  
MALERTYAMLKPGVLSRRIAGEIISRIERKGFDIIGFKIMRIPRELAEKHYAEHKDKPFF  
GELVDYITSGPVIAMVLEGEQAVKMLRLMCGSTKPEEALPGTIRGDYAMHTNINIIHASD  
SPEAATREIGLFFKPEELVCWSDGNKDWI\*

>SPBDM4\_v1\_80090|ID:27159866| exported protein of unknown function [Uncultured spirochete bdmA 4]  
MKFFLQNNKTGSTKPIKLGALGALS AVFFLAISCASVPREVALSGLFDHF EKAPQVLVK  
TENNFLRDMAASFNDSTIEALMSVASDQKDAVHKPIDRDLKTLMRADMAGIGISWDGN  
TSPAIEVVLAGNFPSLLTSLSFSFDNNWERIVGGYAAKNGKLYLRKPSGGQLHFATWAPE  
DPPAFSGAAGSMARSSGMLSSDADLTIYLDKXSALVTQMPILDGVTLPFDGIMLSATRDA  
ASPAKGS PDARYSTVFQIQMKDEQAARTYKPIIKFMWVLISNKLSSYGVPLSSENSIEQR  
GSLFVSQPITMSAQQMIDAMLELSNLDGNTTDKIIANR\*

>SPBDM4\_v1\_80091|ID:27159867| protein of unknown function [Uncultured spirochete bdmA 4]  
MSTSGAVSSKLA AFFLFFSVTLDDLDFIPFGNMLAAQEASATEQPSHNDTQA APIAPGR  
WAGKLVLQSAQETQGGPQSQSAPSSFSFELVVRILAENRGILVDIPEQGMFSYPIDRYSI  
DAGRFSFVL DAMGADEGLTFSGNFSSSFVPQGGTQKGGIVGTVRGRTWNGSFYVQKEKAA  
SPQGELYIDVPVDGGTLPATLTFPVRTRAVLDANAPAGFPLVILVAGAGKTDRDGNNVDV  
PGKTDLSLKQMAAMLRARNVGSRLYDRRGTEGAYKLEAPGHM TSFSRHILDAAVIRAAEA  
LPRRGR LIVAGMNEGAWMAMAALNIVGGESPVDGLVVL D ASGQSPMETLRQSIESLDPES  
REKALEAAQKLIDTGTLDVPEDLANFFSPNRKDWLATWLA FDPVDTLKKVETPVLVYFG  
ERDMQVSREEFSKLA AAKPQAGIRIVPDMNYVLKEVHNEDENYAAFTDPSFKLPALLADL  
LAS YAKAQPAPQGLLPWSLQ\*

>SPBDM4\_v1\_80092|ID:27159868|adk| adenylate kinase [Uncultured spirochete bdmA 4]  
MNIQSMKLIFLPGGAGKGTISKMVAERLGV PQISTGDMFRAAVKEKTELGLKVQSILAA  
GGLVPDEL TIAIVKERLSWPDVRQSYILDGFPRTIPQAEALAAFSSLDAAVDFEVRDDLI  
LFRLTGR RVCKTCGAIYHAVTKPPKAEGICDL CGEELYTRNDDKEETVKARLSAYHEETE  
PLIGYYTKRLLL TIDGSPDAETVYNTFLSAIGRFLKK\*

>SPBDM4\_v1\_80093|ID:27159869| conserved protein of unknown function [Uncultured spirochete bdmA 4]  
MDSSDWAGVPCSRPKWPLHFSHPV EAVGRKLRIFDQNA STEYFSCCEEIRDYSYENLL  
IEGLEGIDRKMKSGSLKPVELSEYPKIIRADRGKVRACIYIGSFDPPFQLTHLAVAVRFLA  
SELSSSDFVVV VPEGSPDPAKPLKTDYAFRLSI AKMQIEGIFDPPFIKVL DLGMQADTIEI  
ARRFIAMHSGLTLELTHLIGSDVLPVAARFIAEDLSIWRKEAQESGVHYLHSTHVRRGE  
DAIDASYFDAIKNEGASAILDPSIVATPSSTDFRTKQAF TIVLPTPSIRDKMEIIFRYHM

HRSWSSDQE\*

>SPBDM4\_v1\_80094|ID:27159870| NADH:ubiquinone oxidoreductase 24 kD subunit [Uncultured spirochete bdmA 4]  
MPKAISNVKSQSLDSIISWKGKRNNGVNLGALEQAQQNDPKKYLSEITLREISQKLVNPLS  
RVYSVATFYFFSLKPQGEHVIVVCRGTACHTRGSQVLLNEALARLGIKEFKEEEENSVT  
SSDSFATIRTVACFGQCALAPVIMVDGKVISRMTISKLVSLLEKLLKKGGEV\*

>SPBDM4\_v1\_80095|ID:27159871| conserved protein of unknown function [Uncultured spirochete bdmA 4]  
MTNTLDLGLAKEGMAHFYGDTPWISVGMGTGCGIGSGADKVWEAITEKAENNPVRVRRVG  
CFGFCAAEPVMSWRPGKPVLFVTDVDAQKATRIVKGLSDDASYDKIAKLAEARIEEWF  
RTSKLEFGRGYEHLPTWKELNFFKDQEKIVLRDAGMIDPESIEEYIAVGGYRSLVRLTS  
MPPEIIIEEVKKSGLRGRGGAGFPTWRKWSLMRQSLIDNPGEGYIICNADEGDPGAYMNR  
NEIESDPHMLLEGMLLGAYAMGANRGIVYVRAEYPLAVYRLTKAIEDAREHGLLGKNILG  
TKFSFDIDMVTGAGAFVCGEETALISSIEGNAGRPRPRPPFPAQKGIYGRPTSINNVETW  
CNIPVIIARGGEWFAGIGTSTSTGTKVFSFVGKVRNTGLVELPLGSTLESVIYGICGGMG  
PKKKIKAVQCGGPGSGCVPASLFTKPIDYEHLTELGAIMGSGGMVMDQDNCMVAVARYF  
TSFVVRESCGKCTPCREGTSQMLHILQKVSDEGAAEEDLDTLQDLALTVKSSLCGLGQT  
SANPVLTTLRVYRDEYIQHIKGRCPAGICENLFIALCESSCPLHMNIPGYLQLLKENRI  
EDAFELTLRENPLPGTIGRICHFHCRMRCRRDMLDEPVSQGEIHRYLADTMKMGREKQI  
YAKLIKEKLPSSGKRVAIIGAGPAGLTAASYLVRGHEVTIYEASNEAGGVLRWGIPAYR  
LPKDVLLKKEVGFIEKLGVRVFNTRISEPEQWQRLADSCDAIIVAAGAASELTLGVPGED  
AHGVYKACDFLNTLARKEKVRTGGEVVVIGGGNSAIDAARSAMRLGSTVTVVYRRSKTDM  
PANEEELKGALEEGIDLICMASPVEILTRQKDGKHFKA VRIQRMKAGPVDSSGRPTPIP  
TDKVEDISCSTVIVAIGEKEVEIPGIDSIGVERSKNGRIKVDPFSLVTSNPKVYAIGDATL  
GPATAAEAMGQAKTVAEIVDQSLSGKKRFDLFRRFGRMEIPLNISKEKMTRAAML PIN  
ARKSNFMEINLGYTGEQARIEANRCLRCDVREHKREPRGTLVSE\*

>SPBDM4\_v1\_80096|ID:27159872| NADP-reducing hydrogenase subunit HndC (fragment) [Uncultured spirochete bdmA 4]  
MENLIEVTIDSQTVKVDPSNIVEACARAGVKIPTLCYLKGISQNASCVCVVEVEGAKS  
LVRSCVQKPTPGMKIQTASPRVLRARKTAIELLLANHPDCLSCVRADTCELHTMANLLE  
VRADRFPAYRKYPLPDTTSEGIVRDDKCCILCGR\*

>SPBDM4\_v1\_80097|ID:27159873| NADP-reducing hydrogenase subunit HndC (fragment) [Uncultured spirochete bdmA 4]  
VCEETQGVNAIAFTGRGARTRVATFMDRGLAQSACVQCQCQSVVCPTGAITEKDES RDVF  
DALRDSKLSVVVQTAPAIRASLGEALGLPAGSLVTGQMVAALRRLGFAKVFDTQFTADLT  
IMEEGSELLERLSHGTTTPMITSCSPGWINFIEGFYDLLGHVSTCKSPQMFQVAVAKTY  
YAQAAGIAPDKMRVVSIMPCTAKKYEARRKEMDGAWGWVKEQDPGKVPARPFDFVDWALT  
TRELARMIKLAGIEIHLPEEDFDPLGRSTGAATIFGTTGGVMEALRTVYEIVEK KPL  
ENIEFTQVRGFESIKSAEVVLGGSPVRVAVAHGLSNARILLDEIRAGKSPYQFIEIMSCP  
GGCIGGGGQPVLADIEKKLARSKALYTEDRILPIRKSHENPAVNTLYKDFLGKPLGHL SH  
ELLHTSYRARVF\*

>SPBDM4\_v1\_80098|ID:27159874| putative Haloacid dehalogenase domain protein hydrolase [Uncultured spirochete bdmA 4]  
VPRQWWTGVL LLLYTFYMQQKIGIRAVVFDVDGTLYPASSLYMRCIDMFIAHPRIVLEFS  
AARKELRSLQM QHGYIPQNKEDLHRLQASLMAQHLHIDQPHAQTANRARELMEQLFYEL  
PKRFASIRPYPEVRATIEKIRGSGIRVAALSDLPPQEKIYALGLSDLFERSFCTEDFGVL  
KPHPRAFEGMAEALGIDFSEILYVGNNIQYDIEGPKRVGMRAARRGRRCPGADLSFSRWR  
ELADWLLTDKG\*

>SPBDM4\_v1\_80099|ID:27159875| conserved protein of unknown function [Uncultured spirochete bdmA 4]  
MDMTEREISEHRLYNQFITNRRDQDHVVQNLCLGQAQYEKEALRSLLLRITEKSIEYASL  
VKCWTLRGTIHM IHETDLPVFLHTGSLSKYAEQWRACSSIPMNRKIFFADLILEALQEG  
NCTRDALKKRCSEKGMDETESRAYFFNPWGGIIRYL VETGRICYLVGNRSPTYALAPPFV  
PLGHDAAW EIIIDRYFSTFGPATMRDASYFLGKSQQFIQKHMAVDRLKTAQC GKKT YFYR  
NDAVGKGV PACILLPGFDPLLMAFFKEDSLFFERKDIRNIYSLTGIVYPTVMVVRGKIVAR  
WKQSGGKIHM A PFKSLPAKEKSLIEKSIEDRGAVDVVWEG\*

>SPBDM4\_v1\_80100|ID:27159876| Death-on-curing family protein [Uncultured spirochete bdmA 4]

MIRFLTLSEVLLIYEDQIRRYGGTYSVRNLALLSSAVYVPQATFEREYLHKTIPEMAAAY  
AYHICENHALVDGNKRVALATALVFLDINGYDFACSEEEIYQIMMAVASNKMNKAALTGK  
FIQYSKRRIL\*

>SPBDM4\_v1\_80101|ID:27159877| conserved protein of unknown function [Uncultured spirochete bdmA 4]  
MVKRLIQHGNSVALVIDKPILELLNVTFTDTPFEITTDGRNLILSPQSEGNAAINVIDSLE  
KINKKYSNALRRLGK\*

>SPBDM4\_v1\_80102|ID:27159878| putative Ribonuclease Z [Uncultured spirochete bdmA 4]  
MTIKILGNGGFYNEGLPYNAMAINGHVLVETPPDILQSLMQQAMRPAQIDTVFISHIHGD  
HCFGFPFFFNWLYWGESDSHYGRGTRLVIIGPEGLGSHLRELMRLAIPPEHPYLRDFDQ  
RVQIVEIDEDDVVPVKGNLWFGFRRTKHS�PTFSLIAGERGPDGALPSSSEYLKKALFIY  
SSDTSMFEGVRVLLGSGAKLILCDTNGEKENGVHMSPQELMAAAAAQGLSGTGRLRGIHM  
SRKMERVGELRFVQPGEEFTI\*

>SPBDM4\_v1\_80103|ID:27159879|dnaE| DNA polymerase III subunit alpha [Uncultured spirochete bdmA 4]  
MAEFVHLHNHTDYSLLDGAAPVPRLVKKAKAFGMPGIAITDHGNMFGVMAFEKECHDAGI  
NPIIGCEFYVAGGSRLEKTGTENGNKYWHLIIAENLEGYHNLLKLTSGSFTEGFYYKPR  
IDDELLAANSGLIASTACLAGIPLSLILAGKLDQAVKKIGFYKELFGKDFHYLELQDHG  
LDEQRTVNRELIRLSRQLDVPLVATNDLHYVEREDSV AHDILLCIGTNRKRNDPSRMRFP  
NDQFYLSPEEMEALFAEMPEALANTLKINEMARLKIEFFGPLLDPDYQVPEGFSAPDEYL  
RHIAREGLKTRYPNPGSEVVQRLEYELDVIIKMGFTGYFLIVWDFIHWAKEHGIPVGPGR  
GSGAGSIVAYSMTIDIDPLKYDLLFERFLNPERISMPDFDVFDFDFERRGEVIDYVAEKY  
GHDRVAQIITFGTLKAKAVIKDVARALDIPFDEANQVAKLVPEDPKMSLAKALKMEPKLA  
ALMQNPLYSELFSIAAKLENLHRHSSIIHAAGIVIGKSALTDYVPLYKDPKTGLVATQYTM  
EYLENCGLVKMDFLGLKTLTLIRNTLNLHKGIDIEEENIPSDPKTFKMLCEGKSTSI  
FQFESQGMQSVLKRAKPSIEDLIALNALYRPGPMENIDQFINSKNGKMAITYPHPSLEK  
YLKGTYGIVVYQEQVMQVAREVAGYSLGRADLLRRAMGKKKPEILQKEEVPFIEGAVSRG  
YSREDAKRIFEILTPFAGYGFNKSHAAAYSVVAYRTAYL KANYPAEFMAANLTNEISNTD  
KLTEYISEARQMGLSVLPPDINRSDANFSVDHGQIIYGFLGIKGVGEGIAGAIQEEREAR  
GRFVDFIDFLTRLHDAGLNRKTMESLIMAGCFDSLKHGRRQLLNNLERAMEYVEGKRAFE  
ASRIGSLFDMEDMGSYPDFVFEPADFEFSNQEMLQSEKELGFFFS AHPMDEYRMIWERS  
TIDMGLHDHASPNEYIAVALLKEFRVHTTQNGRRMAFGQLEDFRGAIDIVIFPDMLEKN  
EEAFVKDRVLCVRGVFDNTRRSPSLKIQAILDPELKKMSWRELHIQLSPALCRTEAGGE  
PSGTENSGLATGQLGESGLYQLRDAVYSLHGQCKVIFHLPLSGGGEALIEAGLHTTCSAS  
DEDIAFLKRQPAVTEVWRV\*

>SPBDM4\_v1\_80104|ID:27159880| Molybdopterin dehydrogenase FAD-binding protein [Uncultured spirochete bdmA 4]

MEILEYARPRSMDEAFRLIRERHGTAIGGAAWLRNTKTALGVDLAAGLLEYIREAGER  
IEIGAMTTYRELETSQLLKARFGPLFEATVSHVVGIQLRNIITVGGTVAGRYGFSDLNTT  
LCALGAKAVFYPGQTVDLADFIEKGAETPFLEKILLPASMKASYQQMRISENFPIINT  
ASAWTGSDWRIAVGSRPAATRLCKKAMSLGDDPYPSDEKIVAAHAATDELQFGSDIRA  
SASYRRETLHVLIRRALMEVRG\*

>SPBDM4\_v1\_80105|ID:27159881|xdhC| Xanthine dehydrogenase iron-sulfur-binding subunit [Uncultured spirochete bdmA 4]

MIITLHINGKEESVECLPGEMLTEVLRAGYLEVKKGCDTGNCGVCTVLLLEGKPVLSCSY  
LAIRADSKEVTTIQGLAGEAKKFAQFLTAEADQCGFCAPGFALTVLSMKKELHDPNEAE  
IRHYLAGNLCRCSGYEQIRAIKKYLEAEHA\*

>SPBDM4\_v1\_80106|ID:27159882| Aldehyde oxidase and xanthine dehydrogenase molybdopterin binding protein [Uncultured spirochete bdmA 4]

MRDYHTPTLPPVDKPLEATEKFNIVAHDVSKVDGEGLVLGRPAYADDLAPQNALHVKLVR  
SPHAFARILSIDPSEALALPGVACVLTWKDCPRIPITRAGQGNPEPSPHDRFILDEYVRY  
VGDEVAVVAESEAIAEKAAPLVKVEYEVLPVLDFEKALDNPIVIHPEPEIHEMFPIGF  
EPARNIAAAHYHMEIGDVEKEIAASPVAVETTVYTQAQQHV ALEPHTAFSYFDVQGRLVIV  
TSTQNPWHTRRLGLAFQMPLRQIRIVKPRIGGGFGGKQHIHV EYPYVAMVTMKTGRPARL  
ALTRREVFEATFTRHEMRVKVRLGADQNGMLRAIDMQVLSNTGAYGEHALTTFMVAGSKT  
LPLYNKAVAVRFGGHVVYTNKVSAGALRGYGAIQGLTGLESAMDELAHKLKM DPVELRRK

NMLHEGETSEVFRIMGEGTEGVAMIIESCKLEECIARGKELIGWDPGNLVREIAPGKVRA  
KGMAIAMQSGIPLVDMGSARIELQDGGFFKLHV GATDLGTGSDTILAQIAAEELGVD  
MKDIVIHSSDTHTPFDVGAYASSTTYVSGSAVLKAARSLKTKLIEAVA  
EKLGV APEGIIYKDKIFRTL DGTKLSLDDFSYDTLYHDGAKMQTLEATESFTGDKS  
PPPYLA AAFVEI ELDVE TGKVDVVNYVAVADVGT PINPNTKIQIEGGLLQGI  
GMALYEDVRYSEAGHMLSHTMMTYPIPSREDVGRITVELVNSYEPSGPF  
GAKSAGEIGIDTPPAIANAIRNAV GIRL TEYPFT PERVLMAIRAAEKKQRPL\*

>SPBDM4\_v1\_80107|ID:27159883| putative XshC-Cox1-family protein [Uncultured spirochete bdmA 4]  
MNELRTWILGRLDRGETVVLAAVTHTS GSTARGTDALLAMDSKGAMAGTVGGGFSE  
GQTI DAARQFFVPEGASSHTGQIARDLEFDLTPETNNTQMICGGRLSVHLEKIEPR  
GSAAQALRACFDHVEN GAPCAFATMGTSRGRHYLA VGDEKRILFPQTPAQGEKKVLD  
ALLATLEVARP GFGGAADF ALEAGNDPELKA VRVFWLGMADP VVYIFGAGHVG  
VATCDVANLAGFKVVVTDDRPELLTGERFPRASLLRAIESFERPLTPYGKTPAIDIG  
PQDCALILTRQPDIDKEMLA QLLRTDAGYIGLIGSKTKRAGIFAALRNEGFTDADL  
SRVHSPIGLAIGARTPEEIAVSIVAEIIAVRAGVLPNSVIPDAETVPKKAAR\*

>SPBDM4\_v1\_80108|ID:27159884| Metal dependent phosphohydrolase (fragment) [Uncultured spirochete bdmA 4]  
VSHMNNFEIRPAAIILAAGYSSRMGATKPIVLIEGTPMLVRAAQTFVNANIGHIIV  
VTG FDTENVSELAAA HGMHPVYN SHFSEGMFSSVCAGIGAVPPDFDAVFLPVDI  
PFVSPRTV SAMRDATRDAMRARPVIVPRYGGKAGHPPLLHRTMFDSVGGWHGPD  
GLKGFFRNHASDIGYVDVDDRFLRDIDSRADLEQILMERKST\*

>SPBDM4\_v1\_80109|ID:27159885| Peptidase M20 [Uncultured spirochete bdmA 4]  
MNIAEKLSLVKFRTVSSFRPEEEDKPF AALIEALPGLYPGAHAALERILVGPRGIV  
YRWQGNPSLKPAIFCAHFDVVPASESDPWDEPPFSGTIRDGFVWGRGTQDIKVQI  
ACILEA AETLLSAGFVPERTLYFAFGGDEEVGGRRGAGAIKWFSEQNVHASWVIDE  
GSPVGQGLVGFVHKPIALIGIAEKGYADIVIEVPGQGGHASMPPRNTALGALSHAI  
ARIEDKPPPARITKTTDEFLAALAPHAVSPYKQIFSLRHLLTPVILKAFSATPSTN  
AMVRTTCAATMAQASPKENVLPNLAQAVINVRIMP GTTVAQVIDRFNALIAPYGA  
KAYAKFPEHTVEPSTESSTSEGWNSIVA AISEAFPDAIPAPFLFTAGTDTKH  
YRGITDDIYRFQPLVQTQADLAAVHNVNEKVSVENLERCVRFYRALMNQQ\*

>SPBDM4\_v1\_80110|ID:27159886|livF| leucine/isoleucine/valine transporter subunit ; ATP-binding component of ABC superfamily [Uncultured spirochete bdmA 4]  
MLEVKNLHVAYGGIRALKGVSLSVRKGEIVTIIGANGAGKSTLLNTISGFLKPVKGS  
VLYNGKDLPRRPDLIVKSGICHVPEGRLIFANLSVEDNLLLGA YLRNDKKAVQADME  
KVYRIFPRLKERQSQRAGT LSGGEQQMLAMGRALMTNGEMMLMDEPSLGLAPLLV  
QTVFDIIEQFRGLGKTILLVEQNAFKALQVADRAYILEQGRIVKEGPARDLALDPA  
VKEAYLGSRSRGGGGD\*

>SPBDM4\_v1\_80111|ID:27159887|livG| leucine/isoleucine/valine transporter subunit ; ATP-binding component of ABC superfamily [Uncultured spirochete bdmA 4]  
MTVATLLRVHELTKKFGGLTAVDAVSFDVPEGGIVGLIGPNGAGKTTIFNLITGVYK  
PTS GSIEFRGKSIVDLEPFRIADMGITRTFQNI RL FKNLSVFDNVL TACHLNANYS  
FAEAILR LPRFRAQEKLLMTKADNLLDIMGLLG YKDLIASNLPYGLQRRLEIVRAL  
ALNPSLLLLDEPAAGMNPDETEQLMRLIARIRNDFKLSVLVIEHHMDLIMGVCEHIV  
VLNFG EKIAQGSAD EVSKNPQVIEAYLGTSEE AADA\*

>SPBDM4\_v1\_80112|ID:27159888| Inner-membrane translocator [Uncultured spirochete bdmA 4]  
VDWTYIQGILMLAGINMIAVLGLSLLTGFTGLFSFGHAGFMAIGAYVGAWISASPT  
STPA GLGLPFVLAIVGGGVAAGAVSYFIGRISLNLKGDYFCIATLGFGEAIRLIF  
NNVNRF GGA RGWPGVPGKSTFLAILVADVVA VLFLANLVKSRHGRNMIAVREEE  
LAAQIAGIDVFRYKMLSLIISAVYAGVAGVFFAHYMTFIQPKMFS LTKSTELTIIVIF  
GGLSISGSVLGALVLTALPEILRTFEMWRLV FYGAAVILIMVSRPKGLMGMELTP  
SGIRKMVAERNALREAKARL LAEAQVGEEE\*

>SPBDM4\_v1\_80113|ID:27159889| High-affinity branched-chain amino acid transport system permease protein LivH (TC 3.A.1.4.1) [Uncultured spirochete bdmA 4]  
MVQFLQQLINGLSIGSVYALMAVGYSLVYSIMNFSNFAHGGVIMLGAYFGFFGLTLL  
KLPFAVAFLASFGTLLVAIIVERIAYKPLRERKAPFLYFIISAMGASILLENLVIATIG  
PTF



RTYPEVFSKAPIELGPLAIGRLDLIFVISA VSLTLLILFIDKTKLGKAIQAASYNVKAC  
 ALMGVNTDRVILTVFGLGGFLAGIAGVFFGMKYTVYPQIGNITTKSFIAAVFGGLGSLPG  
 AVLGSHLGHIEFVAGYLSSQFRDLIAFVILIAVLVVRPTGIMGKVTEDKA\*  
 >SPBDM4\_v1\_80114|ID:27159890| Extracellular ligand-binding receptor (fragment) [Uncultured spirochete bdmA 4]  
 VGDDYSQGLREFFKVNFEKGGTIVADESFNSGDVDFRPQLSKIKASNPVIFMPYFFKE  
 VALSANQARDLGKATLLGGDGWPSDQLISMGGKAVEGSYFVNHLDYADPAVQDFKTRYK  
 AKYGKETELNGFLAHDVLLFVEGLKKGAGKANGEAIAKALEGIDVQGITGRIHISPETHN  
 PEGKDA AIEKIVDGQYVFQEKYAAQ\*  
 >SPBDM4\_v1\_80115|ID:27159891| Branched-chain amino acid ABC transporter, amino acid-binding protein (TC  
 3.A.1.4.1) (fragment) [Uncultured spirochete bdmA 4]  
 MKKLLFAALAVL VLAGCGGGGKSDVIKVGWL GALTGDQAVWGENELNTVKMLFEEYNAA  
 GGIEVGGRRKYTLEVIGYDNKGDQPESVNVTKRLTGQDKVVAIIGPNSSGNAIPMAPILEK  
 R\*  
 >SPBDM4\_v1\_80116|ID:27159892| protein of unknown function [Uncultured spirochete bdmA 4]  
 MARRHTLDSGSPSAGRLSPHETAQRLESFLARWRESGGRAIDAFALAAGSEDALDLLPDV  
 PPWVEC VGALVTKDRTRVLLWLKSKPSAGESNIYEKISAGVQLPFRPQWWASRSVRIRY  
 YVIPPSPAGGADALLSGLEQAHGSLIVLSPPGSGEMLIQISESR\*  
 >SPBDM4\_v1\_80117|ID:27159893| conserved exported protein of unknown function [Uncultured spirochete bdmA 4]  
 MKRLLAAWGFLVVFSSVQVHAQTGLELVCSEVVAGEGVTAVRPLSDFFSGLRGTPFDTPV  
 FVMGDGARGTEGAEAPPCAIVAGTHANEIAGVLASYWIIERCVRPEGRLVVVPRANASG  
 ATWSLQDASGPRFLDLGSRTIRYGTLSNPAQERLADPGSFVPPQASGNFPALAGQEARN  
 LNRQYPGRQDGNRTAQAYALTLMLQAEVRIALDLHEASMTSSLVWSMITRPEHLDA  
 LAALDIEDETGVSFHLED SRDEFAGYSHWEWGKLGISAFLVETPNPAQPTDDPTIEQLHN  
 AAAPLAKRVYVHLCAAKALIANAADLLQDAGALRIEGFPSSVEEVGRWLEGTL\*  
 >SPBDM4\_v1\_80118|ID:27159894| conserved exported protein of unknown function [Uncultured spirochete bdmA 4]  
 MVRKHRFVARVLSVALMAGIGVLQVCAQGTVPPSLQGSFLQPGYITSAGQTSDAIVKVL  
 ANTRLKLGFGYDIAAKPQSIAGAKTLVLVLGASNKGLGAAGLSLEQDIERVKS VIAEAQK  
 NGVRIISMHTGGTARRGEASNQVIELCPVPSDVVVVVEGGNNDGFFDLDLCEKAGVPLVEV  
 ASISAAGNVLKSLMAQQ\*  
 >SPBDM4\_v1\_80119|ID:27159895|ggg| Gamma-glutamyltranspeptidase [Uncultured spirochete bdmA 4]  
 MALQRHEKVARRKRVAMSL LAILAFVVAAPLSAADTVKAEVSARNGMVASAQPLASAA  
 GLEILMAGGNAVDAAVASAFALGVVEPNATGLGGEGMMVIYLADKDVTV AIDYRSMSPLA  
 DMSKVKFGSTGHVAVAVPGTVAGLCDALQKYGTMSLAEVMAPAIRYARNGFIVSETLAQT  
 IADRFDPISNNEALLKIVAPEGLPLVAGQIIKNPDLAATMEKIAEGGPDVFYRGEIADAI  
 ADDMAKNGGYITKADLAA YRAIEREPVRGTYRGEIVSAPPPVGGISVIEMLNMLENFDL  
 ASEAPLSPRNVHIMAEVMKRGFADNSAYVGDPAFTDIPVRGLLDKEYAKSRAAEIDLGKM  
 SPSTKAGTPSEHPSTTHLSVVD RGGNMVALTQTISGFWGACVAVPGTG VILNNEMQNWSS  
 RGPNA YAPGKRMRTTIAPTIIAKNGVPFVTMGTPGAGRIISTMVILAVDLLDYHMGVQEA  
 IESPRFYARDTEKDL SIESRMPAETQAWLKSIGYSIKEYPFDLFFGGAQAILVDPDTGM  
 MYGGADPRRDGAVVFGF\*  
 >SPBDM4\_v1\_80120|ID:27159896| conserved exported protein of unknown function [Uncultured spirochete bdmA 4]  
 MRRYFRCFLFGLFLIFIAVPTFSSPFSGAGTILHDVRPGKGITRVTWLSEWSSPLEGTPA  
 DTRVFIADSGKPGATVFIAGGTHANEIAGILSAVLLIENAVPSAGRLIVIPDMNMSASTW  
 TESTKVPSWVRIETPNGRFFKYGARYTDPVHQGAPDPDRYVHPKGGDALEGSEARNLNR  
 VYPGKPDGTLTERLAWALMSLLKQEGVDIAFDLHEAGPESRLANMIVANPKNLDLAAALAV  
 INLEMDGIRMKLEPSSDAFHGLSHREWGDGTKAYAF LIETPNPAQSTENGNPVEDPQYPL  
 AGRIATHLASIGAILDAWNMDCPPDKRIEFDALPDWRAVAASGAGAFLNW\*  
 >SPBDM4\_v1\_80121|ID:27159897| protein of unknown function [Uncultured spirochete bdmA 4]  
 LGAGSSDTRNFY YSEVLSKVGRLKEPPFIAAFAYGFNETRANAKPISEATDF\*  
 >SPBDM4\_v1\_80122|ID:27159898| ABC-type transporter, integral membrane subunit [Uncultured spirochete bdmA 4]  
 MNELMTVLKKNVREYGM YIALAAIIAVFTILSHGVFISSRNIANLLNQTGYIAVLA VGMT  
 LVIVIRHIDLSVGFLSGFLGAI AAIISLTQWHWPVWLSILFVLGLGICAGLLTALPVAGLG  
 IPAFVASLAGWLIYRGALMLVTAATGTIIPNESFNALGNGYIPDLFASNSFLPGIHKTT  
 LVLGLIATIVFIFGQIADRKRKMQYKFEVLSTGLFVAKLVFMAILGFISWILAGYNGMS

WTVVIMLAVVLVYDFITRRTVIGRHIYAVGGNPEAAELSGISVRNITFTVFGSMGFLAAL  
SGILFAARLKSATPQAGTLFEMDAIAAAAYIGGVASGGIGSISGLIGALVYMSLMNGMN  
LLGTDISLQYVIRGLVLLLA VIFDVITRKRKL\*

>SPBDM4\_v1\_80123|ID:27159899|xy|G| fused D-xylose transporter subunits of ABC superfamily: ATP-binding components [Uncultured spirochete bdmA 4]

MSDNILEMRHITKTFPGVRALSDVNFAVRRGEIHCLVGENGAGKSTLMKVLSGLYPHSDF  
EGEIIFNKGKKEFNHIDSEEAGIGIYQELALVPDMTVYENIMLGHEIRRGMTIDVQEM  
IHKAELLRRVRLSINPSAKVKDLGIGKQQLVVIKVLNRVSLILDEPTAALNEDDCD  
NLLNILRLKTQGVTSIMISHKLKEVLSIAETITVLRDGTICTLDRQKDEVTEQILIKH  
MVGRSIENIYPPRTSTHAEAVLEVKDWASAYDAKLGRKVLNNVNFHVCKGEIVGLSGLVG  
SGRTELARSLFGNPDGYIVSGDMVFKGKKQRFTHPRHAIRSGLAYATEDRKRNGLILIKS  
IQENISLANLQGVSKNGVINEELDKQNALNFVNSLSIKTPSISQLVMNLSGGNQQKVSVA  
KWLFVGPPEMLIFDEPTRGIDVGAKYEIYTIMNDLVAKGMSILMISSELPEILGMSDRIYV  
VANGTITGELDAKSATQEAVMRLATQY\*

>SPBDM4\_v1\_80124|ID:27159900| Periplasmic sugar-binding protein [Uncultured spirochete bdmA 4]

MKRSLFIAMLFIVAGIAFADTQVGIVLPTKDEPRWIQDQTRFLDALKSAGFSKVLFSQ  
GDSAKEKANVEALLSENIKVLICPDGTAADAAAADLAHKAGVKVISYDRLIRETTSDY  
YVTFDSFQVGKAWGDYLNKVPAGSKGNNLYLYAGAASDNNSFIFFEGAWSALQPKIADG  
TYIVRNSDKATALSKKAALTRDEEAQIIGQVTTNWNFSDAKNKAEANLTAACKDAKGTVY  
VCAPNDGTARAIADAYAADKDVKTYIITGQDAEIASIQYIIDGKQSMVTLKDVRTLVSDA  
IAAAVAYMKGQTPPVNTYNNNGKKDVPKPTAIVVVTQDNVKEIVDSGYWPADKFTGLK

\*

>SPBDM4\_v1\_80125|ID:27159901|xy|F| D-xylose transporter subunit ; periplasmic-binding component of ABC superfamily [Uncultured spirochete bdmA 4]

MREIELRVKMRMRHMRRIILVAVSIVCMAASLGLSSCSKSKKPVADRAPMIGFSLDSLVE  
RWRRDVDSFTKAAHDLGADVLRVANQDANTQIAQVRELLNQGIDVLVIIPNDAERLSDV  
CREAKRKGVPVLSYDRLVHNADVLDYISFDNEKVGSLQAQAVTEAVPGGNYVIVNGAITD  
NNAFMINKGFHAVLDPFIADGRIRLLEEIWPWDMSDEVTRFEALLKPGQKIDVVLGCGN  
DMLAETIISVLSENRMVGGTKVTGQDAELSACQRIAEQSQFATIYKPIDALALKAAGFAV  
MMAHGKIRYDTKIDDGRYKVSYIALEPILVTAKTLYSTVIKDGFTREDIYRNVKH\*

>SPBDM4\_v1\_80126|ID:27159902| Two component transcriptional regulator, AraC family [Uncultured spirochete bdmA 4]

MKRVLIAADDEMPVINGLSLLFKRYFQGGYTVVGTARSGREAIEKSKALSPEIILMDVQMP  
GITGLDAIRELSREGGAKAFILVTAYERFDIAREALSMGVCDYLLKPVSRERLGIALTAA  
SSYLDRVQLLNERELEFRDRQQLVPFVKTAFFVSARQKAGYQSGGSGNDLSLFKEMQL  
SGETGIMGISSFPSDGAVDAA YERFCSVIQYKTVALAGPLEDRRYCAWFLPLKNEAVPS  
QELAAFLAVLQSAFSAQLATGEMKLSYGQPEKLETLGRSWDTALRLFAKGPTSDDKWEEN  
AACALDAQFYDEIIEGRFAMAGQALERMILLSLESAEPMKRDILFRIIAALSFAASKLAGG  
GVLSEKVVREFMDFSDIERLWAE GASQLFASNVRSRFQTLQQRAAAAGAHSPFVVRALQY  
IENHYQEPITLESVAEAIGVSSGHLTRLMSDELKRGFARTLIEYRMQKAKELLKRPVNSI  
REVSRLCGYPDANYFARLFRRLTGHTPREYAARVAKGDNSDA\*

>SPBDM4\_v1\_80127|ID:27159903| Signal transduction histidine kinase, LytS [Uncultured spirochete bdmA 4]

MIDLSFLAHLRKPRRRSGLRNRIIVNSVILLVLVIATSYTAFASFDLARSVELLFRNSI  
SMEELRSTLRDTQENLTGYLSAKNSESLKEFIRTSTILSGMTSRLNRENKVDDVFLLEKD  
LAFLLDGYLASAEGAVQAKGRDVAQYVSLYEDARRNASLIEFLSARMDTIHLDQSLKGF  
SSYKANISPALVSNVLLLVAFLLSIALIGRYSYTITEPLARLSVAEAEIGRGEYDHPLP  
PYEREDEIRTLHDAFVNMQDSIQRAFAELTRKAELERSLMEERMVLTQYQHRKDAELLA  
LQTQINPHFLYNTLAAGWQLALTEGNEKTAEFLEKLA AFIRYALKPSTRFVLVSEEIECV  
RQYIWLKLRFRGERFRFRLEAQDEALGYETPALVLQPLVENAIVHGLKDLEEGGDVIVSA  
RLDGETVRFSVSDSGRGMKDSIALALAAADPEDTTPQHIGLHNVRRVALATGGLGRV  
EIESELGHGTRVTIILQAGKAV\*

>SPBDM4\_v1\_80128|ID:27159904| conserved exported protein of unknown function [Uncultured spirochete bdmA 4]

MKRAAWRMLPIVVFAIALTGALAVNISLVSRSRNALASTILRNPATVRTARFHVVAAILPD  
TADPFYTHLIEGLRGESEQNAALQIFYYPSTAIGEGGSTSEEVS RWF EIALRSKADGIL

LFQPKGMDVARFAQEADSAHIPFVPLAMDAPQAWTRSGVTGDSVSQGKEAGTLVLGLLGS  
AARIGIILSSDTS LGYAFNEEPFYRGVEETLKDRPGAVLVAAVREEESILGGEDACARML  
TEHPDINAILCIDAKATIGAAQVIIDRGNVGVQVIIGSDEDESEVNRLIEKGVVHASIVRN  
AAAMGQSGVALAIGQRIGLRSPEKISVGYHVIPTRGDGP\*

>SPBDM4\_v1\_80129|ID:27159905|glmS| Glutamine--fructose-6-phosphate aminotransferase [isomerizing]  
[Uncultured spirochete bdmA 4]

MCGIIGYTGPRKTSKILLEGLRRLEYRGYDSAGIAVGRNLNAEPRLEIIKSVGKIAELARK  
IPEDIDGNWGHTRWATHGGVTEANAHPHDTMSGKIAVVHNGIENYKTLRTMLEKKGV  
VFKSETDTEVIPQLIASYYEGDLLAAVLAALQHLEGTYGIACIHADEPGRIVGARNGSPL  
IVGVGKDEMFLASDITAMVAYTNRVIYLNDGEVIDITQDSYTITDRHSNALDKKVDEVTW  
ELGAIKESGFMHYMEKEIFEQPESIARAMSGRIDEENAIKLGGLNLTRRQLADVRRVRI  
IAAGTSHWAGMTGSYLLEQAARIPAQAELASELRYRNPVVENGSLWFVVSQSGETADSLY  
AMREVQRKGATVLGICNVVGSTIARESDDGGVYVHSGPEIAVASTKAFTSQLTVFYLFLL  
MARMRDMRSREGQKFARSLEIPDMVRDALGKRDLIAIAKKYCRAKDFLYLGRGILYPI  
ALEGALKLKEISYIHAEGYSAGEMKHGPIALISPEVPSVFLVSDDYLHEKTISNMREIKA  
RGGPVIAVGVEGDAEAMALADDFIPVKKADPRFYPFSMVVPLQLFAFYCALELDRDQDQP  
RNLAKSVTVE\*

>SPBDM4\_v1\_80130|ID:27159906| protein of unknown function [Uncultured spirochete bdmA 4]  
MIPYHNHPSKDGTQISHGMMLALFLKLG\*

>SPBDM4\_v1\_80131|ID:27159907| conserved protein of unknown function [Uncultured spirochete bdmA 4]

MPAQEPLFQLFSFPCLGSTMDEARALAREGFTGAAIVRADTQTSGRGRIGGRTWVDAPKL  
SLLMTILLPADFKEAKALPLRAGLGVVRALEETAALNETVMIQRDQKPAARSYKFRLLKWP  
NDVLVQPHQREPGVRSAAAIPRDGAA YGKLCGILCESA QGRILIGIGMNLRSPPPVRSH  
SGLQPASLEETWGCLPPFDNLDEAAHYVAQQVIDTLDSPQWHSEYERLWGRGSTLQFL  
AGHPQSPERMQGMCVGIDEDGALILNIEGEKKTFAASGEIASLRLV\*

>SPBDM4\_v1\_80132|ID:27159908| 2-dehydropantoate 2-reductase [Uncultured spirochete bdmA 4]

MDSIHSTVIVGAGAIGASIAARLVDAGHRVSVSARGERAARYQREGFVVNGRQYFLPVTD  
SHGAVPADLVLVAVKNYSLDEAIQEMKPYVGAETIILSLLNGVDAVPKLREAFGPDAVPY  
GMILGIDAYRQGNEIQYSAKGQIFCGFEKELAQKNASKLARLEQLFRQSDILFRVPDDIV  
REIWFKFMINV SINQWSAVLRAPYQIFQTSSHAIALLERAMKEVIVLSQKIDTGLTEADI  
AKAMAVLRTLGDGKTSMLQDVEAHRRTVEAFAGTMVRLAGAAKVEVPINAMLYEAILA  
IEDSYKAQ\*

>SPBDM4\_v1\_80133|ID:27159909|HflX| GTPase HflX [Uncultured spirochete bdmA 4]

MHSNISMSTLRETERVFLVGVASEDLRKPEARELLDELHGLAQTGLLETVEGELIQLRD  
TTPSLLVGTGKAEELAEAADQAGADSIIFDHILSPVQQRNWEKLSKKVYDRAELIIF  
ASRALTKEASLQVELAQLQYTLPRLAHSYDDL MRQRGGRYGTKGSGEQKLELDRREIERR  
IHEIKDELESVRKERSVQKRRRERAGVPRAAIVGYTNAGKSSLLNALTAA SVHAENTLFA  
TLDPTTRLLFAQGQTLTLLTDTVGFIRNLPHGLVEAFRSTLEEASQADLLIHVADASDVH  
VDAHIATTQLVCEIGANDVPRILVLNKIDLAERDAEAFLLRYPGSVAVSAKTGQGLDG  
LVEAIQEALTRGMKTYVLRIPHADYSIASLVMREGTVLEEHHDESTWLHCRIPGRIEKK  
VQPYIVDAAGMGAGIFSAKE\*

>SPBDM4\_v1\_80134|ID:27159910| Aminotransferase class I and II [Uncultured spirochete bdmA 4]

MPLQISDLSDAVLHTHYAVRGPIVARAQELEDHGKEIICNIGNPQALGQKPLSYVRNVL  
AACERPELLKVANHAFLDDVREKARYILEQSRYGIGAYSESKGLRFVRAAISEFIAARDS  
HDGVAQASNPEHVYLTGASKGVQ TALRLLIASGNDGILIPQYPLYSATITLYGGRQI  
GYLDEESGWGLNEQLLEDAMRRAMKEGIRARAIVVINPGNPTGSVLSEDDMRMVIHFAK  
RHNLA LADEVYQENIYKPKLKFISFAHLSKIEEREVSLSFHSTSKGFFGECGQRGGY  
MEVRNVPEEVIAQITKLQSVALCANLPGQVLT YLMVSPPVAGEPSYRLFDEERNAILSEL  
GKRAKMMEEGLNRIPGIHCQPIDGAMYAYPSLSLPAGRTDEEYCMTLLEATGVCVVPGS  
FGQKPGTAHFRTTILPPTSQIEHVIDAIAAFHLQWR\*

>SPBDM4\_v1\_80135|ID:27159911| Diguanylate cyclase with PAS/PAC sensor [Uncultured spirochete bdmA 4]

MNFANDPSELQAMPGLSILQVLHEGVYIVDKERRIQYWNTAAEAITGYS AKTVVGRRC  
DNILRHVSEDGQQCTSGCPLQATLEDGKTRDLMAYLHHKDGRRLPVHVRSIALRDETGI  
PRVLEVFNEISDRGKLEELETLRQEVLTDP LTKIGNRRYELNGEARLAAYHAQKIPFG

LLMFDIDHFKA VNDGSGHGAGDSVLKMIAGTISHGLRPLD TVARYGGEEFVVMVPDCTEE  
YLSIVGGRIRMLIETSWLELDDGRRLTVTISGGGSMAQPGDTLATLTARADKHL YASKKS  
GRNRVIVDA\*

>SPBDM4\_v1\_80136|ID:27159912| RluA family pseudouridine synthase [Uncultured spirochete bdmA 4]  
VKKPFSLYIDTEIL AIDKPAGVLA VPDHWDPDVPVAREMLS KDLGKLLPVHRIDKDTTG  
VLLYARDEEAHRELNR RFSTRQVEKTYFAIVHGEPEHEAWEVEFPLRADGDRMHRTIIDT  
SNGKPAKTRFEVVERFRGFTLVRALPETGRTHQIRVHLTASGLTIVADPLYGDGVPLMLS  
ALKRKWKGDAYEERPLVARTALHAAKIAFQHPKSGARLEIEAPLPRDFKAALAQLRKLCS  
P\*

>SPBDM4\_v1\_80137|ID:27159913|groL| Cpn60 chaperonin GroEL, large subunit of GroESL [Uncultured spirochete bdmA 4]

MAKQLLFSEDARRKLLVGVETISKA VKVTLGPKGRNVLLDKKFGAPT VTKDGVSVAKEVE  
LEDPYENMGAQLLKEVATKTNDIAGDGT TATVLAYSIVKEGLKSVAAGIDPMALKRGID  
QAVTLSVEEIRKNSKEIKEKEEIAHVASVSANNDIEIGTQIADAMDKV GKDG VITVEESK  
TMETTIEYVEGMQFDRGYTSPYFVTNRDSMTTVFENPLILIHDKKISNMKDLLPLEKIA  
QTGKPLMIIAEDIEGEALATLIVNHLRGT LNVCAVKAPGFGDRRKAMLEDIAVLTGGEVI  
SEELGLKLENTSLNQLGTAKSVKVDKNTTIINGGGKQKDIQDRIAQIKKQIEETTSDYD  
REKLQERLAKLAGGVA VINVGAATEVEMKEKKHRVEDALSATRAAIEEGIVPGGGIALIQ  
SALALEKADTSNMTDDERVGFKIVKRALEEPIRQIAENAGIDGSIIADKAKHEKKG VGF  
AAKMEWADMVKS GIIDPAKVTR SALQNAASVAALLLTTECAITDLPEKNPPAPPAGNPGM  
GGMDY\*

>SPBDM4\_v1\_80138|ID:27159914| conserved membrane protein of unknown function [Uncultured spirochete bdmA 4]

MSTNEKPTNTNTASTPQTPRRHGQGF GPPGGGPHALMPGEKSRDFKGT MCKLLAYLGPYR  
WGLLVVMVLATAATILSIMGPKILGTAT TTLFEGVVKKIAHSGDIDFAKIGSILLTVLGL  
YVSSAILQYIQGWVVS GIAVKITYTLRKDIMAKINRMPFRAFDNTNHGEILSRMTNDVDT  
VNQTLSQLSQMITSVMTLIGAFVMMLTISWQMTLIALLMIPLSIGVVR FIVKRSQKYFK  
IQQDYLGHVNGHVVEIFGAHTVVKAFGGESKAVQTFEELNSTLYQSAWKSQFLSSIMMPL  
MNFVGNLGYVAVAVSGGWLA AKQMTIGDIQAF LQYVRSFTQPITQVANISNVLQQTAAA  
AERIFDFLASEEEKQDLAPAKVPEGIKGKVEFRHVHFGYVQGGPILKDFSATVLPGQTV  
IVGPTGAGKTTLV KLLMRFYEPESGEILIDDVPIQELPRSVVRSWFGMVLQDTWLFSGTV  
RDNIAYGKHEVREEDIIESAKATHVDHFVRAFPEGYNFVLNEETT NVSQGQKQLLTIARA  
MLAKPPMLILDEATSNVDTHTELLIQKAMLTLMQGRTSFVIAHRLSTIRDADLILVMDHG  
DIVEQGTHEELLAKCGFYAELYSQFDESGEAQAACS\*

>SPBDM4\_v1\_80139|ID:27159915| ABC-type multidrug transport system, ATPase and permease component [Uncultured spirochete bdmA 4]

MRTVFRYLKSYWASIIIVLLFIQANADL TLPDYLSQIVNIGIQQNGIEEDLPQVMRAS  
SFEAMGKLLMEGAGDAFAVLQKVYTHVTPGSAEADALAKKWPLAKTEAVMSLNTGDKAA  
TDSARKVFLAEYPKLVVFSQMSGVGT TGSAGGTETS VSTGTAPVAPSNQPGGAQSNAMPG  
LPALDSTSPQAILAQIDSMDPLAKSQL VVKGLQAEFAALGVDM SALQTSYILRIGALMLL  
ITLVSALATILVGYLGSRMAAGTARDLRS AVFTKVEDFSLAEFDSFSTASLITRSTNDIT  
QIQMMIMMGTRMLFYAPIIGVGGVIRALGKASGMWWIIALAVGVLLAIIGLVFAIVVPKF  
RIVQKLIDRLNLVVRENLSGMMVIRAFNRQDHEAKRFDKANRDLTG TLLYVTRVMVVLMP  
LMTIIMNVVSVSIIWVGSHEVAAGSIRVGDMMAFMQYSMQIFFAFIMMSFMFIMLPRASV  
SADRIAQVINTEVSIRDPKTPSQLSSPVHGQIEFRNVRFRYPGAQEDVLHDISFTA KPGT  
MTAILGTTGSGKSTLVSLIPRFYDVTEGQV LFDGVDIKSLPLAELRSHIGFVPQKSM LFT  
GSIAENIRYGKESASDDELVEALSISQIMSLAEESPEGLEHQISQGGMNVS GGRQRLSM  
ARALVRRAPVYIFDSSFSALDYKTDRAIRSALKTYAKDSVIFLVTQRVAPIRHAEQIIVL  
DDGRAVGIGTHEQLMETCEVYRDIALSQLKQEELA\*

>SPBDM4\_v1\_80140|ID:27159916| putative transcriptional regulator, MarR family [Uncultured spirochete bdmA 4]

MMTENIELENALKTW MGQVMQLSMRSFIEYTTETGLSMPQIAVLFLLNGDKHRAVTELGE  
EFGVSGAAASQMVEKLVQMGFVERREDSNDRRIRRLLLTTKGNIVERNIEARQRWMRSF  
CSTFSPESARDTARVFRDITEAAKRFETAQAPVPRHNSGI\*

>SPBDM4\_v1\_80141|ID:27159917| Beta-N-acetylhexosaminidase [Uncultured spirochete bdmA 4]

MMACDLVPVPVSFEEKESIFALGPGAGVAAPLALQKEAGLLAQWLSRIGEVGHVGVSVAA  
GPAERRHGS AVGGMGSTISLFLDPGMKRAEYELDIGPEGICIAARDAAGIVRGAASLFQ  
LALSQGRMLRAVRIRDWPRFAWRGFMLDCARNFFRVEFIEKLLDLAALHKLNVFHWHLTD  
DQAWRLEIPSKPELTDCAFRQDMRYRIDCRKGGYYSVEDVTRIVEYAAVRHIMVVPEIE  
TPGHATAILASHPEFSCLGGQDASVHFEPEDRYGIFEDILCGGNDRVLSFFDEVLDEVCA  
MFPGDYVHMGGDEAPKGRWLACPDCQRKMRVLGLIKDDGRYEPEGLQAWFMGELARMLAR  
RGKRMIGWDEVVEGCIGKDTLVMSWRGYENGRRAELGYDVVMCPQTKACYLDHKHLDSP  
EEPGLGVCSVRDSYMFPEPLPEGLSVGAASHIIGGQANLWSELLYFGRQAEYMLFPRLCA  
LSEVFWSPREKRNFEDEFMSRLETHKRRLDALDVLYYKGRLS\*

>SPBDM4\_v1\_80142|ID:27159918|bg|A| Beta-glucosidase [Uncultured spirochete bdmA 4]  
MKRQDDFPDDFIWGCSTSSYQIEGAVKEDGRGPSIWDTFHAHTPGKVTGGHTGDIACDSYH  
RWKDDISLLRELNAGAYRFSVSWPRIQPRGKGAPNQVGLDYYSRLVDALIGAGIEPWLEL  
FHWDLPPLEEEGGWRVRDTAMRFEYAAIMYEHIGDRVCHWTSMNPEWCAAFGLHGTGE  
HAPGLRDRQAASRAVHLLLAHGLAVRAYRQSLGAGEYGLVINPNRPRPATLRPEDVDAS  
ERASVERTSLWLDPVFGRGYPADFVERFGDDLPIEAGDMDIIASPLDFIGVNYNNEEA VR  
AAAPSADNPYGFVPTTYQKRTGMDWEIEPQGLRRILEYIAATWPCRSFLVTENGAAPFD  
IPGPDGIIRDYDRIEYMRGHIAACGEALAHGVPLKGYFVWSLMDNFEWSFGYTRKFGLVS  
IDHITKARRPKLSFYRDRDRIAGFGL\*

>SPBDM4\_v1\_80143|ID:27159919| Binding-protein-dependent transport systems inner membrane component  
[Uncultured spirochete bdmA 4]  
MSEAIRESKLLKALSAGRVA VYMVMGIFAFMTLYPIFWLIMNSFKTTREFQVSQLALPH  
APTLQNYVEAWKMGDFSLLFPNSIYTLGATAGIIFLSLLAGFAFAKLKSRATKPIYNSF  
VIGILLTQTLMIPLFLEVNLLGIYNTRLAVLLVYIGAGLPIGIYLSLEYIKAIPSAVVE  
SARIDGAGFFKIFLKIIPMSVPVATTLAMLNITSIWNEFALINILVSKTELKSLPLGIY  
KFSGLSTDYGKQFAALTIGMVPMLVFYMIFRKQITKGVAAGAMKG\*

>SPBDM4\_v1\_80144|ID:27159920| ABC-type transporter, integral membrane subunit [Uncultured spirochete bdmA 4]  
MAYTNRAHLEEKRAYWAMVTPAFALYLLVMAFPIILSFVLSVSNYSGGKMFGEKWFAG  
FGAYARVFTDPWFVNALKNNLYIVLISVFGQLPLGFIFAYFIYAKIVKAPNFWQGVLYVP  
NIISVIVVGLLWQTIFSPHGPIGEIIYFRVSDFQAQLKGIFNAAGGFSLSDDVIHKILD  
LAGPAGQSMFSPVPELRDLLSSYQGQPMSEVYTALSNLFVQKWSPAFLTKPDIAMVPVL  
FVILWMYTGMYLILFLANMQKIDAQIIESARIDGANEGQVMRFILPALS GTIVNSAILA  
ISGLSSFALIFAMTGGGSPRVTEILSIYMYNNAFLGRPNFPLAN AISLIMVIISFVLIA  
LTKAVEKRYGGKED\*

>SPBDM4\_v1\_80145|ID:27159921| Extracellular solute-binding protein family 1 [Uncultured spirochete bdmA 4]  
MKKGFLVVLVAIAFGSVVAQEKVTLNVLNYQQADQAGYQEDVAIWQKFQQQNPDITLNM  
EVLFNPEYHQKLQAYAAAGTLPDVFYVWPTARSAVIHEKKLAKDLSKLLGPDFLKD FSGA  
ATNPNNQLGKYMAMLPQSFTYTSVMYV NKKLLADNGFDLPKTYDDLK KMVPK LKAKGINV  
VMLPDKDGWPMQSCFLSTVLGRMAGDSFVDAILAGKAKFTDKPFIDSLKVIDNLYKDGII  
AREDNQVGYGEAPGLFVSEKAAIYIDGDWRAGAYITDKASGKALIPPAQQTDFALLPFP  
AIAGEVNPGLVLSAIAAGTGWAVSGSIPAGSAKEKAAVRLIKYLYSDEVQAIRYSTGAYVPT  
RKNVKANVEPLVAKVPVYADNPKTCYVFDGMFDPAVYNV LNDGLIAIGLGTSTPEKVAA  
DIQKAYETWKSSQK\*

>SPBDM4\_v1\_80146|ID:27159922| ROK family protein [Uncultured spirochete bdmA 4]  
MPPRGDQWTRTATRIFRTIWRNPNISRIDLADTLGLDKSTVTKQVAYLIDNGLIIEKEEG  
EASSRGGRRPIYLA VNKEYGRFIGIELQLGFYEA VVVDLAGNIRATDRGDTHVTRENFAE  
TAAEIVDKMQNQSCGDSLLLGVGIGTAGLVDSKKGRVKYSVPLGIDKSLDFAKAMTGK LQ  
VPSFIENDANCCAWGELAFNRDEELKDFLFTLVEYRRDETSLLKYGGIGVGFIVLGGRV  
HTGAHGYTGEFRSAFCEGPGELQFSLSRDELMQLRCDKILLGRTVDELARNMAMLINTMD  
FQHVYIGGDIEGLDIDLPAILRHRLEENWMPSPKDVEIRYSSLGDKAVAFGAAGMVFER  
LMAERNMPGLAGGTTSDKIRRV S\*

>SPBDM4\_v1\_80147|ID:27159923| Beta-mannosidase [Uncultured spirochete bdmA 4]  
VEIIHLAGEWKL VRLADGTVRPMQVPGDIYSALIQAGELPDYFGENELKAQWPGREDWR  
IEHRFWVPDQFLKLGTMRLLAEVVD TIGEYVLNGILVGKSNNMFRRFEADPKPYLHSGEN  
TIAVIIRSPEQAAIREAGRLPYPIPASPYVSSPHRNLVRKAQCMSGWDWG PCLMTGGIY

DDIRLIATDGPLIRSVQTRTEPLGSFDGASSRGPDFSVEVSAEIEVPAPMEVKISCFLDG  
KRADAGRFCQAGTTTIRIDMEAKEPKLWWPHGHGEPALHDLHVAERVTSTYIHRTDPQT  
GHASATCLHPHIVHKKIGFRELKVVTEEDSVGRSFKFVVGKDFAKGANWIPADALPSR  
WTRARIAGLLDSTVEANMNCLRWWGGGRYESDDFYELCDERGMILWQDCMFSCALYPSST  
EFLLNVEAEITYQVKRLSDHPCIALWCGNNEALGAITWYDESKKNPARYIIDYDRLTEGV  
LGRVIRSLDPDRCFWSSPSAGPNDFSDNWHSDERGDMHFWSVWHEGKPFSEYLTVQPRF  
CSEFGFQSLPSMRTIASFAPQSEWNISPVLEAHQKHPRGNSLILETMLRYFRMPKGFRE  
LAYLSQVQQAMAIRTAVEFWRSTMPRCMGTFLWQLNDVWPVVSWSLNDHGSWKILQYEA  
KRFYDPVLLALFIKNGTVQAHLVSEASGEHRAKVTLRLLDFHGEPFTIPAGVGGKEKGVVE  
EGAQASRSSAVERSLLISENSVQHVWAMPLDVLPCKTEEVFLEATLEVPDLDFKTASVLF  
LTEPKRCALEDPGLEVALESNDEGALEAKICATAAPAFYVVSPELEDAAGQFEDAGFYCAK  
GDHRTIRFIPAARQPSEIRAQPSTKTQTHSGLRVYHLQNSFEH\*

>SPBDM4\_v1\_80148|ID:27159924| MATE efflux family protein [Uncultured spirochete bdmA 4]  
MMSAPIVTEKNMLNKSIALARPLRFFGPGPFYREALALAVPVMQLSLITGLVSLVDNFM  
VAGLGDAKMAGVNIANQVNFIFMVIINVSMAGGIFLSQHRGAQNREGMMQSFRFKLVGM  
TGISILYFAACQLVPEALLSLMVSNNAEGAVIVAEGARYMRAVSFSFIPLALSQAIGSSF  
RDIGEPKVPLIVSTGAAIANTIGNWFLIYGNLGAPRLEVVGAAIATVMARGLEIAAFLFV  
LQKRKPAFSFKVKAIFKIDGKFLGGVLSRSAMMFFSETAVVSETIITALYNRRGGPETV  
AGMAAGWSVANLFFLVFPAIHTATNVIVGSTLGAGKLEDEGRAKARWIMAGSIVFGVAGL  
AAMLSTAAVPLVFGNLSDAAQHITRSIIIVIGIYLPLWCLLNAQFGVSRAGGDTLMGLLV  
DVGVTYAVFIPVAFVIARYTAWGPVALFGIAKLSDIPKAIVAGWWLKKERWVRNLTVSSV  
FKAIL\*

>SPBDM4\_v1\_80149|ID:27159925|trxA| Thioredoxin-1 [Uncultured spirochete bdmA 4]  
MSTEVILTENFKQEVLESKIPVLVDFWAEWCMPCMKIGPSVTQIAETYKDKIKVGKLVN  
DDQGDIASQYGIISIPTLIVFTEGQVARQKVGAIAPRHEIEKLFKDLI\*

>SPBDM4\_v1\_80150|ID:27159926| conserved protein of unknown function [Uncultured spirochete bdmA 4]  
MSQKKGKIRDQNEARRSMAVSARLCRKSMLGLLSWIIVSCAPPGIESAVLGDIPPIVKS  
AQLNAREFVLEFDEPVQVREGSFSAEKPNFIVSAESAEGIVNISFEPQPTPGEAVILAG  
NVQDLCGNSTHVQVQFKGYNDRPAALLLTEVQTAKNTSKKSPHRDYVELYVKEAGNLGGM  
FVQWASSAKTMRDYDFPGCEVSAGEVIVLHLAPEGIADERNESGNDLGLSGGIDATPAGRD  
FWS DAGGLPDASGAVSVYGREGAAPVDGLFYAESKKTGTVESSLVALVQELADAGRWHF  
DSPPKWENALLWKPSATRPLLRTTTSAYGASAWGVGESGSQSPGFVAR\*

>SPBDM4\_v1\_80151|ID:27159927| protein of unknown function [Uncultured spirochete bdmA 4]  
LGLLRFLWDAVLPLKINAENLGRCFKFTLVKTSSVI\*

>SPBDM4\_v1\_80152|ID:27159928| Integron integrase [Uncultured spirochete bdmA 4]  
MGSPYEKTVFKRYLLETCTFRPKGAEWACIWVEQFVRLYPAWRENREHSIEGFGYILSKR  
KPENIVNLALQSVRLFMGMMDNAGDNKAVNAQDSESKNVIPRYDVKKCFQESAPSSGS  
DGAQQDEMAAWSAFSAGIMKDVREYIRLRHRSRTEKTYLGWTRRFLDFIWKRLVRQKE  
GKFCIVADHLRAFLSFLAIEVRVSASTQEALNALLVLFMVLHIEIDGLSSVLRKRRK  
RLPVVLSRDEVAALLAHLQQPYRLMASLMYGCGLRLEECLSLRVKDLNFENETIEVRSRK  
GKDRDLTVLPGVLKLDLQAYLLELKVGVWDKARRRDLPGVFLPEALNKKYTSLSKEWGWYW  
LFPKSPCTNTRTGEVAFWHVHPSVIQKRIHEGIQAGISKMASAHTLRHSFATHLLEDG  
YDIRTIQELLGHSNVQTTMIYTHVAVRNKRGVRSPLLENL\*

>SPBDM4\_v1\_80153|ID:27159929| CopG-like domain-containing protein DNA-binding [Uncultured spirochete bdmA 4]  
MTSVRLPTDLERKLEMVARKKRTSKTNVIREALENLFTQEETEKDSYELGEEYFGKYGSG  
DGLSTTYKNKLKEKLGKYSYHSH\*

>SPBDM4\_v1\_80154|ID:27159930| conserved protein of unknown function [Uncultured spirochete bdmA 4]  
MVNTILIDAGPLIALFDKDDKYHAQIKAFIKQGKYRFITTA VITEVTHMLDFNVQID  
FFEWVVKDGVVLHEIAQKDISRIIALTKKYRDRPMDFADATLVIAAENTGIKNIISIDAD  
FDIYRLPGKVRIENVFKQQ\*

>SPBDM4\_v1\_80155|ID:27159931| protein of unknown function [Uncultured spirochete bdmA 4]  
LSRCLLPFCSVHKLEFIEERKTSNERSEDGALTCXHRANLLSQVALTYARVIREVFGRA  
SL\*

>SPBDM4\_v1\_80156|ID:27159932| protein of unknown function [Uncultured spirochete bdmA 4]  
MNMDFWGFGFYGVSAIFSLPFYIKVIREEDRMQRKNEIGAYNEALPKTSRITRA\*

>SPBDM4\_v1\_80157|ID:27159933| protein of unknown function [Uncultured spirochete bdmA 4]  
MLSESKQKAIVDIWNNYNSTKVVVKDTKGNLDNIDELRVVCIEQLKEIVNEYIRSNTV  
GQFKTALDSFNKRNNHWGFTATKGQMFNQLVRSAITDEDSLKILKDVIPADINEAE  
RKIDILDKYCQKYFNNAKDKRTVNPNSVCYFLSYFWQIFNYKKWPIMYTSLIEAFTEIG  
IWSDFDSQSNTYKYFLNINNEICVLLSKKANKLIDYWDIEHAFWNYKGNPNKQSKKKVET  
PNAQKVITNIEISEYIIPKISLVEIGNDKEQSSAKKGYQFEQLVAEAFKQLDFEVEIY  
GQSGRNPDVIIKNREQNTAFLVDAKAYSEGYSGLDDRAIKEYINTHCPKLMKDGYYKI  
GFILVCNSFNSNLDEFINELTWNTTEIKRFVLLTSEALLYLVAYKTRDKQSLQTIIDSIVS  
IENPITYEKVVSQFEDV\*

>SPBDM4\_v1\_80158|ID:27159934| protein of unknown function [Uncultured spirochete bdmA 4]  
VRVTSERALRQQVGAIVASYAAAPLFSPLSYLGAVSLFYPEAPQEACQERESGSRGCSA  
QKPIFEFLFTIRINHRNTEAFLTFKLGFSYLFQRRR\*

>SPBDM4\_v1\_80159|ID:27159935| protein of unknown function [Uncultured spirochete bdmA 4]  
MNMDFWGFGFYGVSAIFSLPFYIKVIREEDRMQRKNEIGAYNEALPKTSRITCA\*

>SPBDM4\_v1\_90001|ID:27159936| conserved protein of unknown function [Uncultured spirochete bdmA 4]  
MPSLQVRDLPNDIYTQLNYLAEKEHRSQAQETIVLLKEGIITKLGKERRRKLLEKADHL  
NIDGSSFPDPVAMVREDRDR\*

>SPBDM4\_v1\_90002|ID:27159937| conserved protein of unknown function [Uncultured spirochete bdmA 4]  
MIVVLDASAAIEIALNREYSTSFREVLQRQSDLVLAPDTFPSEITNVFWKYAIYSDMPVET  
CEKGIDYCLDLIDDYIETTSKREVFSES YKNNHSAYDLFYIVTARRYNASLLTRDAKMK  
NIADALKINILT\*

>SPBDM4\_v1\_90003|ID:27159938| protein of unknown function [Uncultured spirochete bdmA 4]  
VFYAPLSITSAISIFIEYFFILIIYRIPKAERGVHVFVIDLYVCFQLLF\*
